# Supplementary material for: Comparative Transcriptomic Analyses of a Vero Cell Line in Suspension versus Adherent Culture Conditions
Source: Hindawi journal article supplement (doi:10.1155/2023/9364689), 2023-08-30
Supplement: f1 [file 9364689.f1.zip]

| ids                                     | Log2(fold change)                                                                                                                                                            |
|-----------------------------------------|------------------------------------------------------------------------------------------------------------------------------------------------------------------------------|
| DM_Proline                              | -4.284582819 proline metabolism                                                                                                                                              |
| Proline_DM_COOP                         | -4.284582819 proline metabolism                                                                                                                                              |
| SOD2                                    | -4.268787475 Folate metabolism                                                                                                                                               |
| Folate_DM_COOP                          | -2.545283038 Folate metabolism                                                                                                                                               |
| DM_Folate                               | -2.545283038 Folate metabolism                                                                                                                                               |
| CA12_CA2_CA9_CA14_CA1_CA3_CA4_CA7_CA13  | -2.369776277 nitrogen metabolism                                                                                                                                             |
| Aspartate_DM_COOP                       | -2.05460882 aspartate metabolism                                                                                                                                             |
| DM_Aspartate                            | -2.05460882 aspartate metabolism                                                                                                                                             |
| carnitineAcylTransferasel               | -1.670562162 lipids metabolism                                                                                                                                               |
| ENO1_ENO3_ENO2                          | -1.505199688 glycolytic pathway                                                                                                                                              |
| MTHFD1_3                                | -1.25347137 folate metabolic pathway                                                                                                                                         |
| Palmitate_DM_COOP                       | -1.167201395 palmitate metabolism                                                                                                                                            |
| DM_Palmitate                            | -1.167201395 palmitate metabolism                                                                                                                                            |
| SQLF                                    | -1.143418033                                                                                                                                                                 |
| GCL                                     | -1.129948759                                                                                                                                                                 |
| mGSRnadph                               | -1.099258939                                                                                                                                                                 |
| mGSRnadh                                | -1.099258939                                                                                                                                                                 |
| DM_Urea                                 | -1.061293465                                                                                                                                                                 |
| palmitateActivation                     | -0.9670331                                                                                                                                                                   |
| HMGCR                                   | -0.917450812                                                                                                                                                                 |
| TranspCystineSer                        | -0.912675278                                                                                                                                                                 |
| ACO1_IREB2                              | -0.880865788                                                                                                                                                                 |
| ACO2_ACO1_1                             | -0.880865788                                                                                                                                                                 |
| betaOxidation                           | -0.878995563                                                                                                                                                                 |
| Urea_DM_COOP                            | -0.83646439                                                                                                                                                                  |
| Palmitate_UP_COOP                       | -0.778284167                                                                                                                                                                 |
| ALDH4A1_2                               | -0.777546472                                                                                                                                                                 |
| ALDH4A1_1                               | -0.777546472                                                                                                                                                                 |
| FDFT1_2                                 | -0.687774654                                                                                                                                                                 |
| FDFT1_1                                 | -0.687774654                                                                                                                                                                 |
| TKTL1_TKTL2_TKT_2                       | -0.678250385                                                                                                                                                                 |
| TKTL1_TKTL2_TKT_1                       | -0.678250385                                                                                                                                                                 |
| Complex1ROS                             | -0.605831865                                                                                                                                                                 |
| OAT                                     | -0.590359872                                                                                                                                                                 |
| carnitineAcylTransferasel1              | -0.589582149                                                                                                                                                                 |
| ID1_IDI2                                | -0.578715919                                                                                                                                                                 |
| AKG_DM_COOP                             | -0.569817648                                                                                                                                                                 |
| HMGCS1_HMGCS2                           | -0.554812071                                                                                                                                                                 |
| DLSTP1_DLD_OGDH_PDHX_DLST_DHTKD1_OGDHL  | -0.554765462                                                                                                                                                                 |
| DHCR24_LEFTY1                           | -0.553829688                                                                                                                                                                 |
| LSS                                     | -0.524680714                                                                                                                                                                 |
| GCK_HKDC1_HK1_ADPGK_HK2_HK3             | -0.507108916                                                                                                                                                                 |
| GPI                                     | -0.483360682                                                                                                                                                                 |
| GS                                      | -0.475363661                                                                                                                                                                 |
| MPC1_MPC2_MPC1L                         | -0.219084955                                                                                                                                                                 |
| LDH                                     | -0.182734938                                                                                                                                                                 |
| DM_Glucose                              | 0.074627175                                                                                                                                                                  |
| Glucose_DM_COOP                         | 0.074627175                                                                                                                                                                  |
| DM_AKG                                  | 0.213720885                                                                                                                                                                  |
| LHPP_PPA2_PRUNE_EIF4A2_NAV2_PPA1_1      | 0.42297536                                                                                                                                                                   |
| TYMS                                    | 0.424278355                                                                                                                                                                  |
| PRPS2_PRPS1_PRPS1L1                     | 0.47260837                                                                                                                                                                   |
| PYCR1_PYCR2_PYCR1_LEFTY1_2              | 0.479447542                                                                                                                                                                  |
| PYCR1_PYCR2_PYCR1_LEFTY1_1              | 0.479447542                                                                                                                                                                  |
| MDH2                                    | 0.492942548                                                                                                                                                                  |
| Lactatel_DM_COOP                        | 0.494256927                                                                                                                                                                  |
| DM_Lactatel                             | 0.494256927                                                                                                                                                                  |
| ACLY                                    | 0.495021758                                                                                                                                                                  |
| GART_1                                  | 0.514908059                                                                                                                                                                  |
| GART_2                                  | 0.514908059                                                                                                                                                                  |
| OGDH_GART_OGDHL                         | 0.514908059                                                                                                                                                                  |
| GLS                                     | 0.549620339                                                                                                                                                                  |
| GLS2                                    | 0.549620339                                                                                                                                                                  |
| ACACB_PRKAG2_PRKAB2_ACACA_PRAAA2        | 0.558136215                                                                                                                                                                  |
| ME2_ME3_1                               | 0.562417156                                                                                                                                                                  |
| Asparagine_DM_COOP                      | 0.585687666                                                                                                                                                                  |
| DM_Aspargine                            | 0.585687666                                                                                                                                                                  |
| RPE_LOC729020                           | 0.592214156                                                                                                                                                                  |
| TranspCystineGlu                        | 0.600260089                                                                                                                                                                  |
| SLC25A5_SLC25A4_SLC25A6                 | 0.621127462                                                                                                                                                                  |
| ALDH3B1_ALDH3A1_ALDH3B2_ALDH1A3         | 0.621127462                                                                                                                                                                  |
| Glutamine_DM_COOP                       | 0.629720883                                                                                                                                                                  |
| DM_Glutamine                            | 0.629720883                                                                                                                                                                  |
| TNRC6B_ADSL_1                           | 0.635729181                                                                                                                                                                  |
| TNRC6B_ADSL_2                           | 0.635729181                                                                                                                                                                  |
| SHMT1_2                                 | 0.647763394                                                                                                                                                                  |
| TransportFolate                         | 0.669747064                                                                                                                                                                  |
| G6PPer                                  | 0.681511534                                                                                                                                                                  |
| ATIC_1                                  | 0.716214326                                                                                                                                                                  |
| ATIC_2                                  | 0.716214326                                                                                                                                                                  |
| IDH3                                    | 0.751429959                                                                                                                                                                  |
| CAD_3                                   | 0.758558062                                                                                                                                                                  |
| CAD_1                                   | 0.758558062                                                                                                                                                                  |
| CAD_2                                   | 0.758558062                                                                                                                                                                  |
| ARID4B_GGPS1_FDPS_FDPSP7_1              | 0.767508061                                                                                                                                                                  |
| ARID4B_GGPS1_FDPS_FDPSP7_2              | 0.767508061                                                                                                                                                                  |
| Alanine_DM_COOP                         | 0.775208763                                                                                                                                                                  |
| DM_Alanine                              | 0.775208763                                                                                                                                                                  |
| Serine_DM_COOP                          | 0.900339379                                                                                                                                                                  |
| DM_Serine                               | 0.900339379                                                                                                                                                                  |
| RPIA_LOC101060545                       | 0.911031623                                                                                                                                                                  |
| Glycine_DM_COOP                         | 0.915279126                                                                                                                                                                  |
| DM_Glycine                              | 0.915279126                                                                                                                                                                  |
| ATPsynthase                             | 0.929361346                                                                                                                                                                  |
| AK                                      | 1.020522549                                                                                                                                                                  |
| PFAS                                    | 1.027643105                                                                                                                                                                  |
| CASB_CASA                               | 1.150245473                                                                                                                                                                  |
| IMPDH2                                  | 1.161815824                                                                                                                                                                  |
| CMPI1_DTYMK                             | 1.188041537                                                                                                                                                                  |
| DHFR1_DHFR_4                            | 1.290720546                                                                                                                                                                  |
| DHFR1_DHFR_5                            | 1.290720546                                                                                                                                                                  |
| DHFR1_DHFR_6                            | 1.290720546                                                                                                                                                                  |
| DHFR1_DHFR_2                            | 1.290720546                                                                                                                                                                  |
| Ex_SC_H2O                               | 1.324704252                                                                                                                                                                  |
| MTHFD1_AL445665_1_AQP7P4_LOC286297_2    | 1.46153521                                                                                                                                                                   |
| AK2_TAF9_AK1_AK7_AK3_AK5_AKD1_AK4_AK8_1 | 1.579405647                                                                                                                                                                  |
| Arginine_DM_COOP                        | 1.604353361                                                                                                                                                                  |
| DM_Arginines                            | 1.604353361                                                                                                                                                                  |
| OGDH_ODC1_OGDHL                         | 1.633632399                                                                                                                                                                  |
| MTHFD1_2                                | 1.661709798                                                                                                                                                                  |
| MTHFD2_2                                | 1.661709798 mitochondrial one-carbon metabolism (Fig. 1d), a metabolic system recently implicated in rapid cancer cell proliferation                                         |
| MTHFD2_4                                | 1.661709798 mitochondrial one-carbon metabolism (Fig. 1d), a metabolic system recently implicated in rapid cancer cell proliferation                                         |
| ALDOC_ALDOB_ALDOA_2                     | 1.705661546                                                                                                                                                                  |
| ALDOC_ALDOB_ALDOA_1                     | 1.705661546                                                                                                                                                                  |
| VPS29_PSPH_PSPHP1                       | 2.031170948 One carbon pool by folate                                                                                                                                        |
| CTPS2_GATM_CTPS1                        | 2.040658166 Pyrimidine metabolism                                                                                                                                            |
| ASNS                                    | 2.544354243 asparagine metabolism, adaptation to nutrient deprivation and/or hypoxia.                                                                                        |
| PEPCK                                   | 2.853019955 metabolic pathway of gluconeogenesis                                                                                                                             |
| AGAT                                    | 2.879052713 galactose metabolism                                                                                                                                             |
| PHGDH_UBAC2                             | 4.191346901 Glycine, serine and threonine metabolism                                                                                                                         |
| PSAT1                                   | 4.226572589 Serine pathway has a key role in cancer metabolism, using glycolysis-derived glucose for serine production and tumor growth. unrestrained cell cycle progression |
