# Supplementary material for: Comparative Transcriptomic Analyses of a Vero Cell Line in Suspension versus Adherent Culture Conditions
Source: Hindawi journal article supplement (doi:10.1155/2023/9364689), 2023-08-30
Supplement: f1 [file 9364689.f1.zip]

|      | Gene      | baseMean | log2FoldCh | lfcSE    | stat     | pvalue    | padj      | Adh_A    | Adh_B    | Adh_C    | Susp_A   | Susp_B   | Susp_C   |
|------|-----------|----------|------------|----------|----------|-----------|-----------|----------|----------|----------|----------|----------|----------|
| 14   | OLFM4     | 11425.84 | 9.605845   | 0.162528 | 59.10277 | 0         | 0         | 18.43094 | 35.58177 | 34.78657 | 22444.04 | 22024.28 | 23997.9  |
| 752  | TINAG     | 245.6462 | 9.296898   | 0.746108 | 12.46053 | 1.23E-35  | 4.33E-34  | 0        | 2.189647 | 0        | 473.2109 | 474.8826 | 523.5943 |
| 1774 | S100A8    | 101.3059 | 9.009863   | 1.057069 | 8.523438 | 1.55E-17  | 2.32E-16  | 0.542086 | 0.547412 | 0        | 203.1236 | 226.7457 | 176.8764 |
| 1157 | PCSK2     | 147.3753 | 8.969103   | 0.871282 | 10.29415 | 7.49E-25  | 1.72E-23  | 0        | 0.547412 | 1.391463 | 218.7484 | 320.8666 | 342.698  |
| 2718 | LOC119619 | 24.38332 | 8.80018    | 1.29128  | 6.815085 | 9.42E-12  | 9.21E-11  | 0        | 0        | 0        | 58.0353  | 47.06043 | 41.20416 |
| 962  | TLR4      | 141.7974 | 8.505927   | 0.762736 | 11.15186 | 7.01E-29  | 1.94E-27  | 1.084173 | 0.547412 | 0.695731 | 245.534  | 265.2497 | 337.6731 |
| 3102 | LINGO4    | 27.3629  | 8.019831   | 1.277926 | 6.275663 | 3.48E-10  | 2.98E-09  | 0        | 0.547412 | 0        | 49.10679 | 49.19955 | 65.32367 |
| 165  | LOC119629 | 445.0497 | 7.976744   | 0.373542 | 21.35436 | 3.55E-101 | 5.72E-99  | 3.794605 | 3.284471 | 3.478657 | 935.2612 | 797.8883 | 926.5911 |
| 3983 | LOC103227 | 11.85902 | 7.741729   | 1.437259 | 5.386454 | 7.19E-08  | 4.80E-07  | 0        | 0        | 0        | 29.01765 | 32.08666 | 10.04979 |
| 3993 | LOC119627 | 11.08743 | 7.652298   | 1.422354 | 5.380025 | 7.45E-08  | 4.96E-07  | 0        | 0        | 0        | 26.78552 | 25.66933 | 14.06971 |
| 78   | DTX4      | 689.7059 | 7.632218   | 0.290228 | 26.29733 | 2.06E-152 | 7.01E-150 | 3.252518 | 5.474118 | 13.2189  | 1415.169 | 1210.737 | 1490.385 |
| 4154 | ZNF552    | 10.6534  | 7.598905   | 1.446306 | 5.254011 | 1.49E-07  | 9.52E-07  | 0        | 0        | 0        | 15.62489 | 34.22577 | 14.06971 |
| 4081 | SLC51B    | 10.37827 | 7.583856   | 1.427614 | 5.312261 | 1.08E-07  | 7.05E-07  | 0        | 0        | 0        | 15.62489 | 23.53022 | 23.11453 |
| 4369 | LOC119624 | 9.998912 | 7.499648   | 1.470415 | 5.10036  | 3.39E-07  | 2.06E-06  | 0        | 0        | 0        | 17.85702 | 32.08666 | 10.04979 |
| 4620 | LOC103229 | 9.604941 | 7.434555   | 1.506173 | 4.936055 | 7.97E-07  | 4.59E-06  | 0        | 0        | 0        | 33.4819  | 17.11289 | 7.034856 |
| 4688 | F11       | 9.087373 | 7.36273    | 1.505098 | 4.891862 | 9.99E-07  | 5.66E-06  | 0        | 0        | 0        | 13.39276 | 32.08666 | 9.044815 |
| 5057 | GABRG1    | 8.962927 | 7.336224   | 1.575203 | 4.657319 | 3.20E-06  | 1.68E-05  | 0        | 0        | 0        | 13.39276 | 36.36488 | 4.019918 |
| 5091 | LPL       | 8.417387 | 7.245737   | 1.563321 | 4.634837 | 3.57E-06  | 1.87E-05  | 0        | 0        | 0        | 13.39276 | 32.08666 | 5.024897 |
| 4980 | LOC103239 | 8.25937  | 7.217483   | 1.536008 | 4.698858 | 2.62E-06  | 1.40E-05  | 0        | 0        | 0        | 17.85702 | 25.66933 | 6.029877 |
| 4963 | CYP4B1    | 8.070348 | 7.185987   | 1.52695  | 4.706105 | 2.52E-06  | 1.35E-05  | 0        | 0        | 0        | 17.85702 | 23.53022 | 7.034856 |
| 4999 | ITGBL1    | 8.054846 | 7.184161   | 1.532171 | 4.688876 | 2.75E-06  | 1.46E-05  | 0        | 0        | 0        | 15.62489 | 25.66933 | 7.034856 |
| 5030 | LOC103239 | 7.943337 | 7.164587   | 1.533116 | 4.673218 | 2.97E-06  | 1.57E-05  | 0        | 0        | 0        | 26.78552 | 12.83466 | 8.039836 |
| 5106 | PTPRZ1    | 7.698327 | 7.119087   | 1.539209 | 4.625159 | 3.74E-06  | 1.95E-05  | 0        | 0        | 0        | 15.62489 | 23.53022 | 7.034856 |
| 5507 | DCN       | 7.242346 | 7.023323   | 1.59318  | 4.408369 | 1.04E-05  | 5.03E-05  | 0        | 0        | 0        | 22.32127 | 17.11289 | 4.019918 |
| 5347 | TMEM273   | 7.22082  | 7.023075   | 1.564214 | 4.489841 | 7.13E-06  | 3.54E-05  | 0        | 0        | 0        | 22.32127 | 14.97377 | 6.029877 |
| 4545 | LOC119619 | 14.14509 | 7.020664   | 1.409616 | 4.98055  | 6.34E-07  | 3.71E-06  | 0        | 0        | 0.695731 | 33.4819  | 40.6431  | 10.04979 |
| 5246 | FAM81B    | 7.168289 | 7.019072   | 1.540988 | 4.554918 | 5.24E-06  | 2.66E-05  | 0        | 0        | 0        | 17.85702 | 17.11289 | 8.039836 |
| 5515 | MAGEB10   | 7.21134  | 7.018101   | 1.593187 | 4.40507  | 1.06E-05  | 5.10E-05  | 0        | 0        | 0        | 17.85702 | 21.39111 | 4.019918 |
| 5605 | LOC103239 | 7.180335 | 7.013856   | 1.604529 | 4.371287 | 1.24E-05  | 5.86E-05  | 0        | 0        | 0        | 13.39276 | 25.66933 | 4.019918 |
| 2    | SYT6      | 1734.788 | 6.996363   | 0.162158 | 43.14529 | 0         | 0         | 31.44101 | 24.08612 | 25.04633 | 3401.762 | 3396.908 | 3529.488 |
| 5511 | LOC103249 | 7.006815 | 6.979101   | 1.583596 | 4.407122 | 1.05E-05  | 5.05E-05  | 0        | 0        | 0        | 15.62489 | 21.39111 | 5.024897 |
| 28   | RORC      | 1056.123 | 6.97492    | 0.200571 | 34.77526 | 5.75E-265 | 5.46E-262 | 16.80468 | 14.23271 | 19.48048 | 2053.557 | 1942.312 | 2290.348 |
| 4467 | DIPK1C    | 13.51628 | 6.962877   | 1.383845 | 5.031544 | 4.87E-07  | 2.90E-06  | 0        | 0.547412 | 0        | 31.24978 | 34.22577 | 15.07469 |
| 5306 | LOC119624 | 6.753218 | 6.950471   | 1.539683 | 4.514223 | 6.35E-06  | 3.18E-05  | 0        | 0        | 0        | 15.62489 | 12.83466 | 12.05975 |
| 359  | KCND2     | 181.2872 | 6.938544   | 0.426398 | 16.27246 | 1.55E-59  | 1.15E-57  | 3.252518 | 2.189647 | 3.478657 | 337.0512 | 350.8141 | 390.937  |
| 734  | FAXDC2    | 110.3051 | 6.931597   | 0.550601 | 12.58915 | 2.42E-36  | 8.78E-35  | 0.542086 | 0.547412 | 4.87012  | 229.9091 | 213.9111 | 212.0507 |
| 5626 | GPR149    | 6.597766 | 6.900418   | 1.582296 | 4.361016 | 1.29E-05  | 6.12E-05  | 0        | 0        | 0        | 11.16063 | 21.39111 | 7.034856 |
| 6063 | LOC119629 | 6.625314 | 6.898716   | 1.66627  | 4.140214 | 3.47E-05  | 0.000152  | 0        | 0        | 0        | 8.928508 | 27.80844 | 3.014938 |
| 732  | CCL2      | 104.9757 | 6.877118   | 0.546133 | 12.5924  | 2.37E-36  | 8.44E-35  | 0.542086 | 2.189647 | 2.782925 | 209.8199 | 207.4937 | 207.0258 |
| 5865 | LOC103246 | 6.529309 | 6.873851   | 1.623173 | 4.234825 | 2.29E-05  | 0.000104  | 0        | 0        | 0        | 22.32127 | 12.83466 | 4.019918 |
| 6054 | LOC119620 | 6.315304 | 6.825164   | 1.647736 | 4.142146 | 3.44E-05  | 0.000151  | 0        | 0        | 0        | 15.62489 | 19.252   | 3.014938 |
| 6055 | LOC103249 | 6.315304 | 6.825164   | 1.647736 | 4.142146 | 3.44E-05  | 0.000151  | 0        | 0        | 0        | 15.62489 | 19.252   | 3.014938 |
| 5743 | MNDA      | 6.256751 | 6.823566   | 1.586113 | 4.302067 | 1.69E-05  | 7.83E-05  | 0        | 0        | 0        | 13.39276 | 17.11289 | 7.034856 |
| 6087 | DUX4      | 6.299801 | 6.822609   | 1.65301  | 4.127385 | 3.67E-05  | 0.00016   | 0        | 0        | 0        | 13.39276 | 21.39111 | 3.014938 |
| 6088 | NLRP8     | 6.299801 | 6.822609   | 1.65301  | 4.127385 | 3.67E-05  | 0.00016   | 0        | 0        | 0        | 13.39276 | 21.39111 | 3.014938 |
| 5789 | MLANA     | 6.241248 | 6.821145   | 1.593528 | 4.280531 | 1.86E-05  | 8.56E-05  | 0        | 0        | 0        | 11.16063 | 19.252   | 7.034856 |
| 1844 | LOC103214 | 44.77034 | 6.806983   | 0.81728  | 8.328831 | 8.16E-17  | 1.18E-15  | 0        | 0.547412 | 2.087194 | 84.82083 | 87.70354 | 93.46309 |
| 5881 | NFILZ     | 6.092712 | 6.797297   | 1.608814 | 4.225037 | 2.39E-05  | 0.000108  | 0        | 0        | 0        | 20.08914 | 6.417332 | 10.04979 |
| 6344 | HTR3A     | 6.132305 | 6.782529   | 1.691983 | 4.008628 | 6.11E-05  | 0.000256  | 0        | 0        | 0        | 13.39276 | 21.39111 | 2.009959 |
| 6046 | IL22RA2   | 6.110779 | 6.780377   | 1.635507 | 4.145734 | 3.39E-05  | 0.000149  | 0        | 0        | 0        | 13.39276 | 19.252   | 4.019918 |
| 6096 | RCVRN     | 6.095277 | 6.777986   | 1.643935 | 4.123027 | 3.74E-05  | 0.000163  | 0        | 0        | 0        | 11.16063 | 21.39111 | 4.019918 |
| 5979 | PRR9      | 6.058249 | 6.776595   | 1.624215 | 4.172228 | 3.02E-05  | 0.000134  | 0        | 0        | 0        | 8.928508 | 21.39111 | 6.029877 |
| 6277 | LOC103230 | 6.064271 | 6.774172   | 1.677426 | 4.038431 | 5.38E-05  | 0.000228  | 0        | 0        | 0        | 6.696381 | 25.66933 | 4.019918 |
| 3581 | LST1      | 21.68797 | 6.753314   | 1.169637 | 5.773854 | 7.75E-09  | 5.75E-08  | 0        | 0.547412 | 0.695731 | 62.49956 | 34.22577 | 32.15934 |
| 136  | LOC103218 | 388.014  | 6.752322   | 0.295487 | 22.85149 | 1.41E-115 | 2.76E-113 | 3.252518 | 6.02153  | 13.2189  | 776.7802 | 752.967  | 775.8442 |
| 6841 | LOC103240 | 5.933803 | 6.737636   | 1.772262 | 3.801717 | 0.000144  | 0.000558  | 0        | 0        | 0        | 8.928508 | 25.66933 | 1.004979 |
| 6159 | LOC119629 | 5.890752 | 6.733136   | 1.64486  | 4.09344  | 4.25E-05  | 0.000183  | 0        | 0        | 0        | 8.928508 | 21.39111 | 5.024897 |
| 6267 | LOC119618 | 5.875249 | 6.731227   | 1.664746 | 4.043396 | 5.27E-05  | 0.000223  | 0        | 0        | 0        | 6.696381 | 23.53022 | 5.024897 |
| 6051 | LOC103239 | 5.646634 | 6.71065    | 1.619592 | 4.143419 | 3.42E-05  | 0.00015   | 0        | 0        | 0        | 13.39276 | 6.417332 | 14.06971 |
| 3913 | IRF6      | 21.20265 | 6.705584   | 1.233649 | 5.435571 | 5.46E-08  | 3.71E-07  | 0        | 0.547412 | 0.695731 | 40.17829 | 72.72976 | 13.06473 |
| 6255 | ELF5      | 5.800769 | 6.703805   | 1.656311 | 4.047432 | 5.18E-05  | 0.00022   | 0        | 0        | 0        | 20.08914 | 10.69555 | 4.019918 |
| 5941 | LOC119618 | 5.674182 | 6.699599   | 1.599195 | 4.189356 | 2.80E-05  | 0.000125  | 0        | 0        | 0        | 11.16063 | 12.83466 | 10.04979 |
| 6537 | LOC119627 | 5.775786 | 6.695326   | 1.705828 | 3.924971 | 8.67E-05  | 0.000353  | 0        | 0        | 0        | 13.39276 | 19.252   | 2.009959 |
| 6075 | LOC119618 | 5.732736 | 6.695119   | 1.619586 | 4.133846 | 3.57E-05  | 0.000156  | 0        | 0        | 0        | 13.39276 | 14.97377 | 6.029877 |
| 6352 | LOC119619 | 5.723255 | 6.688641   | 1.669628 | 4.006067 | 6.17E-05  | 0.000258  | 0        | 0        | 0        | 8.928508 | 21.39111 | 4.019918 |
| 6281 | LOC119619 | 5.686227 | 6.687723   | 1.65653  | 4.037189 | 5.41E-05  | 0.000229  | 0        | 0        | 0        | 6.696381 | 21.39111 | 6.029877 |
| 6317 | IGFL4     | 5.611747 | 6.659907   | 1.657489 | 4.018071 | 5.87E-05  | 0.000247  | 0        | 0        | 0        | 20.08914 | 8.556443 | 5.024897 |
| 6143 | NHLH2     | 5.559216 | 6.65513    | 1.623155 | 4.10012  | 4.13E-05  | 0.000179  | 0        | 0        | 0        | 15.62489 | 10.69555 | 7.034856 |
| 607  | LOC119629 | 118.4742 | 6.65307    | 0.491654 | 13.53203 | 1.01E-41  | 4.43E-40  | 3.252518 | 3.284471 | 0        | 238.8376 | 252.4151 | 213.0556 |
| 440  | LOC103249 | 149.606  | 6.650074   | 0.437291 | 15.20742 | 3.16E-52  | 1.91E-50  | 1.626259 | 2.737059 | 4.87012  | 303.5693 | 265.2497 | 319.5835 |
| 5006 | MS4A7     | 10.64622 | 6.645385   | 1.418241 | 4.685653 | 2.79E-06  | 1.48E-05  | 0        | 0        | 0.695731 | 13.39276 | 25.66933 | 24.11951 |
| 5510 | NOX5      | 10.91427 | 6.643303   | 1.507234 | 4.407432 | 1.05E-05  | 5.05E-05  | 0        | 0.547412 | 0        | 24.5534  | 36.36488 | 4.019918 |
| 5219 | GADL1     | 10.76893 | 6.62232    | 1.449041 | 4.570141 | 4.87E-06  | 2.48E-05  | 0        | 0        | 0.695731 | 33.4819  | 21.39111 | 9.044815 |



|      |           |          |          |          |          |          |          |          |          |          |          |          |          |
|------|-----------|----------|----------|----------|----------|----------|----------|----------|----------|----------|----------|----------|----------|
| 1230 | MIOX      | 287.6528 | 6.618252 | 0.657146 | 10.0712  | 7.41E-24 | 1.60E-22 | 4.336691 | 1.642235 | 11.82743 | 551.3354 | 483.439  | 673.3362 |
| 5349 | MYH1      | 10.67272 | 6.612944 | 1.472922 | 4.489676 | 7.13E-06 | 3.55E-05 | 0        | 0.547412 | 0        | 20.08914 | 36.36488 | 7.034856 |
| 6224 | NT5C1B    | 5.333167 | 6.612241 | 1.62672  | 4.064768 | 4.81E-05 | 0.000205 | 0        | 0        | 0        | 13.39276 | 8.556443 | 10.04979 |
| 6465 | PTN       | 5.428748 | 6.608733 | 1.671778 | 3.953116 | 7.71E-05 | 0.000317 | 0        | 0        | 0        | 17.85702 | 10.69555 | 4.019918 |
| 6488 | LOC119618 | 5.382224 | 6.598537 | 1.672428 | 3.945482 | 7.96E-05 | 0.000326 | 0        | 0        | 0        | 11.16063 | 17.11289 | 4.019918 |
| 6375 | LOC119620 | 5.345212 | 6.597783 | 1.65252  | 3.992559 | 6.54E-05 | 0.000273 | 0        | 0        | 0        | 8.928508 | 17.11289 | 6.029877 |
| 6    | LOC103218 | 21930.51 | 6.585508 | 0.088827 | 74.13822 | 0        | 0        | 454.8105 | 466.9423 | 433.4406 | 43144.78 | 41789.67 | 45293.42 |
| 5289 | LOC119625 | 10.40639 | 6.577078 | 1.453859 | 4.523877 | 6.07E-06 | 3.05E-05 | 0        | 0        | 0.695731 | 35.71403 | 14.97377 | 11.05477 |
| 5221 | P2RX7     | 10.33516 | 6.570129 | 1.437807 | 4.569548 | 4.89E-06 | 2.49E-05 | 0        | 0.547412 | 0        | 29.01765 | 21.39111 | 11.05477 |
| 6697 | LOC119627 | 5.230246 | 6.553086 | 1.698951 | 3.857136 | 0.000115 | 0.000455 | 0        | 0        | 0        | 13.39276 | 14.97377 | 3.014938 |
| 6540 | LOC103230 | 5.140687 | 6.548494 | 1.668767 | 3.924151 | 8.70E-05 | 0.000354 | 0        | 0        | 0        | 6.696381 | 17.11289 | 7.034856 |
| 6574 | AGR2      | 5.177715 | 6.54812  | 1.674572 | 3.910323 | 9.22E-05 | 0.000373 | 0        | 0        | 0        | 8.928508 | 17.11289 | 5.024897 |
| 6677 | LOC119627 | 5.162212 | 6.545632 | 1.692905 | 3.86651  | 0.00011  | 0.00044  | 0        | 0        | 0        | 6.696381 | 19.252   | 5.024897 |
| 4172 | LOC119620 | 19.39827 | 6.54072  | 1.247114 | 5.244685 | 1.57E-07 | 9.98E-07 | 0        | 0        | 1.391463 | 33.4819  | 68.45154 | 13.06473 |
| 6716 | CYP4F57   | 5.056727 | 6.507212 | 1.690454 | 3.849388 | 0.000118 | 0.000469 | 0        | 0        | 0        | 15.62489 | 10.69555 | 4.019918 |
| 6567 | LOC103235 | 5.019699 | 6.506324 | 1.662814 | 3.912838 | 9.12E-05 | 0.000369 | 0        | 0        | 0        | 13.39276 | 10.69555 | 6.029877 |
| 6732 | LOC103238 | 5.025721 | 6.499981 | 1.691031 | 3.843798 | 0.000121 | 0.000478 | 0        | 0        | 0        | 11.16063 | 14.97377 | 4.019918 |
| 6785 | LOC103230 | 4.936163 | 6.497604 | 1.699527 | 3.823183 | 0.000132 | 0.000516 | 0        | 0        | 0        | 4.464254 | 17.11289 | 8.039836 |
| 6796 | FGF20     | 5.010219 | 6.497007 | 1.701105 | 3.819286 | 0.000134 | 0.000524 | 0        | 0        | 0        | 8.928508 | 17.11289 | 4.019918 |
| 5390 | MTRNR2L5  | 9.835862 | 6.493099 | 1.452976 | 4.468829 | 7.86E-06 | 3.88E-05 | 0        | 0        | 0.695731 | 29.01765 | 19.252   | 10.04979 |
| 7050 | ECRG4     | 4.979213 | 6.492363 | 1.748775 | 3.71252  | 0.000205 | 0.000774 | 0        | 0        | 0        | 4.464254 | 21.39111 | 4.019918 |
| 7032 | CHST9     | 4.89871  | 6.467386 | 1.737591 | 3.722043 | 0.000198 | 0.000747 | 0        | 0        | 0        | 20.08914 | 4.278221 | 5.024897 |
| 6690 | S100A9    | 4.830677 | 6.457453 | 1.673014 | 3.859772 | 0.000113 | 0.000451 | 0        | 0        | 0        | 13.39276 | 8.556443 | 7.034856 |
| 5756 | GRIN2A    | 9.581372 | 6.454649 | 1.502216 | 4.296753 | 1.73E-05 | 8.00E-05 | 0        | 0        | 0.695731 | 13.39276 | 36.36488 | 7.034856 |
| 6769 | TTL8      | 4.852202 | 6.453164 | 1.685767 | 3.82803  | 0.000129 | 0.000507 | 0        | 0        | 0        | 13.39276 | 10.69555 | 5.024897 |
| 6798 | DYTN      | 4.784169 | 6.446949 | 1.688667 | 3.817774 | 0.000135 | 0.000527 | 0        | 0        | 0        | 6.696381 | 14.97377 | 7.034856 |
| 7042 | CLDN14    | 4.842722 | 6.444499 | 1.734105 | 3.716327 | 0.000202 | 0.000763 | 0        | 0        | 0        | 8.928508 | 17.11289 | 3.014938 |
| 5661 | LOC103247 | 9.32735  | 6.414509 | 1.477504 | 4.341451 | 1.42E-05 | 6.65E-05 | 0        | 0        | 0.695731 | 31.24978 | 14.97377 | 9.044815 |
| 7459 | LOC119627 | 4.752739 | 6.412021 | 1.792019 | 3.578098 | 0.000346 | 0.001234 | 0        | 0        | 0        | 20.08914 | 6.417332 | 2.009959 |
| 5429 | LOC103235 | 9.145038 | 6.40843  | 1.441259 | 4.446412 | 8.73E-06 | 4.28E-05 | 0        | 0.547412 | 0        | 17.85702 | 21.39111 | 15.07469 |
| 7117 | LOC103227 | 4.715711 | 6.40764  | 1.736406 | 3.690173 | 0.000224 | 0.000837 | 0        | 0        | 0        | 17.85702 | 6.417332 | 4.019918 |
| 6836 | RBP3      | 4.61065  | 6.399479 | 1.682558 | 3.803423 | 0.000143 | 0.000555 | 0        | 0        | 0        | 8.928508 | 10.69555 | 8.039836 |
| 6873 | TBX22     | 4.647678 | 6.398097 | 1.689053 | 3.787979 | 0.000152 | 0.000587 | 0        | 0        | 0        | 11.16063 | 10.69555 | 6.029877 |
| 6906 | LOC119625 | 4.632175 | 6.394494 | 1.694021 | 3.774743 | 0.00016  | 0.000617 | 0        | 0        | 0        | 8.928508 | 12.83466 | 6.029877 |
| 7005 | LOC119627 | 4.669203 | 6.39444  | 1.7138   | 3.731148 | 0.000191 | 0.000723 | 0        | 0        | 0        | 11.16063 | 12.83466 | 4.019918 |
| 7347 | LOC103248 | 4.690728 | 6.394131 | 1.767952 | 3.616688 | 0.000298 | 0.00108  | 0        | 0        | 0        | 11.16063 | 14.97377 | 2.009959 |
| 7051 | OPRK1     | 4.6537   | 6.391037 | 1.721707 | 3.712036 | 0.000206 | 0.000775 | 0        | 0        | 0        | 8.928508 | 14.97377 | 4.019918 |
| 7413 | INSL4     | 4.675225 | 6.390808 | 1.777643 | 3.595102 | 0.000324 | 0.001163 | 0        | 0        | 0        | 8.928508 | 17.11289 | 2.009959 |
| 7169 | NLRP11    | 4.638197 | 6.388098 | 1.738522 | 3.674443 | 0.000238 | 0.000884 | 0        | 0        | 0        | 6.696381 | 17.11289 | 4.019918 |
| 7363 | SOHLH1    | 4.622695 | 6.385648 | 1.767591 | 3.612628 | 0.000303 | 0.001094 | 0        | 0        | 0        | 4.464254 | 19.252   | 4.019918 |
| 5547 | LOC103226 | 9.014569 | 6.378145 | 1.451955 | 4.392799 | 1.12E-05 | 5.36E-05 | 0        | 0.547412 | 0        | 20.08914 | 21.39111 | 12.05975 |
| 5802 | FKBP6     | 8.973196 | 6.370329 | 1.491059 | 4.272351 | 1.93E-05 | 8.86E-05 | 0.542086 | 0        | 0        | 11.16063 | 32.08666 | 10.04979 |
| 4513 | MYH13     | 16.83744 | 6.367245 | 1.272036 | 5.005552 | 5.57E-07 | 3.28E-06 | 0        | 0.547412 | 0.695731 | 24.5534  | 64.17332 | 11.05477 |
| 5608 | MGAT4C    | 8.834764 | 6.349104 | 1.452903 | 4.369944 | 1.24E-05 | 5.89E-05 | 0        | 0        | 0.695731 | 17.85702 | 21.39111 | 13.06473 |
| 7805 | LOC119618 | 4.554237 | 6.348653 | 1.832901 | 3.463718 | 0.000533 | 0.001815 | 0        | 0        | 0        | 15.62489 | 10.69555 | 1.004979 |
| 7316 | LOC119626 | 4.517209 | 6.341797 | 1.747698 | 3.628658 | 0.000285 | 0.001035 | 0        | 0        | 0        | 13.39276 | 10.69555 | 3.014938 |
| 7088 | LOC119627 | 4.480181 | 6.340505 | 1.712982 | 3.701444 | 0.000214 | 0.000804 | 0        | 0        | 0        | 11.16063 | 10.69555 | 5.024897 |
| 7834 | LOC119625 | 4.523232 | 6.340239 | 1.834078 | 3.456907 | 0.000546 | 0.001854 | 0        | 0        | 0        | 11.16063 | 14.97377 | 1.004979 |
| 4342 | RNASE11   | 16.81309 | 6.337267 | 1.23642  | 5.125497 | 2.97E-07 | 1.82E-06 | 0        | 0        | 1.391463 | 26.78552 | 55.61688 | 17.08465 |
| 7712 | LOC119625 | 4.41817  | 6.328266 | 1.813917 | 3.488729 | 0.000485 | 0.001673 | 0        | 0        | 0        | 2.232127 | 19.252   | 5.024897 |
| 7994 | CUNH7orf3 | 4.439695 | 6.326904 | 1.852925 | 3.41455  | 0.000639 | 0.002125 | 0        | 0        | 0        | 2.232127 | 21.39111 | 3.014938 |
| 4381 | UPK3BL2   | 16.71362 | 6.32339  | 1.241708 | 5.092495 | 3.53E-07 | 2.14E-06 | 0        | 0        | 1.391463 | 33.4819  | 51.33866 | 14.06971 |
| 5946 | LOC103238 | 8.731844 | 6.314554 | 1.507936 | 4.187547 | 2.82E-05 | 0.000126 | 0        | 0        | 0.695731 | 17.85702 | 27.80844 | 6.029877 |
| 6189 | SLC30A8   | 8.608085 | 6.308879 | 1.546434 | 4.07963  | 4.51E-05 | 0.000194 | 0        | 0.547412 | 0        | 6.696381 | 36.36488 | 8.039836 |
| 8889 | CUNH21orf | 4.38674  | 6.299335 | 2.001616 | 3.147125 | 0.001649 | 0.004931 | 0        | 0        | 0        | 15.62489 | 10.69555 | 0        |
| 7696 | SLCO6A1   | 4.365215 | 6.288652 | 1.799578 | 3.494514 | 0.000475 | 0.00164  | 0        | 0        | 0        | 15.62489 | 8.556443 | 2.009959 |
| 7697 | LOC103217 | 4.365215 | 6.288652 | 1.799578 | 3.494514 | 0.000475 | 0.00164  | 0        | 0        | 0        | 15.62489 | 8.556443 | 2.009959 |
| 6064 | INSYN2B   | 8.595353 | 6.288472 | 1.519004 | 4.139864 | 3.48E-05 | 0.000152 | 0        | 0        | 0.695731 | 22.32127 | 23.53022 | 5.024897 |
| 7258 | LOC103227 | 4.291159 | 6.285423 | 1.722071 | 3.649922 | 0.000262 | 0.000961 | 0        | 0        | 0        | 11.16063 | 8.556443 | 6.029877 |
| 7401 | LOC119627 | 4.328187 | 6.285268 | 1.745944 | 3.599925 | 0.000318 | 0.001143 | 0        | 0        | 0        | 13.39276 | 8.556443 | 4.019918 |
| 7396 | DMRT3     | 4.2016   | 6.284115 | 1.745045 | 3.60112  | 0.000317 | 0.001139 | 0        | 0        | 0        | 4.464254 | 10.69555 | 10.04979 |
| 7417 | TMCO5A    | 4.297182 | 6.276924 | 1.746963 | 3.593049 | 0.000327 | 0.001171 | 0        | 0        | 0        | 8.928508 | 12.83466 | 4.019918 |
| 7726 | LOC103234 | 4.318707 | 6.275783 | 1.801415 | 3.483807 | 0.000494 | 0.001701 | 0        | 0        | 0        | 8.928508 | 14.97377 | 2.009959 |
| 7497 | LOC103247 | 4.244651 | 6.27418  | 1.761618 | 3.5616   | 0.000369 | 0.001307 | 0        | 0        | 0        | 4.464254 | 14.97377 | 6.029877 |
| 7498 | LOC119625 | 4.244651 | 6.27418  | 1.761618 | 3.5616   | 0.000369 | 0.001307 | 0        | 0        | 0        | 4.464254 | 14.97377 | 6.029877 |
| 7500 | LOC119625 | 4.281679 | 6.273514 | 1.761827 | 3.560801 | 0.00037  | 0.001311 | 0        | 0        | 0        | 6.696381 | 14.97377 | 4.019918 |
| 7671 | LOC119625 | 4.266176 | 6.270628 | 1.790016 | 3.503114 | 0.00046  | 0.001594 | 0        | 0        | 0        | 4.464254 | 17.11289 | 4.019918 |
| 8057 | LOC103227 | 4.287701 | 6.269824 | 1.84562  | 3.397137 | 0.000681 | 0.002247 | 0        | 0        | 0        | 4.464254 | 19.252   | 2.009959 |
| 4477 | XIRP2     | 15.702   | 6.263699 | 1.246445 | 5.025249 | 5.03E-07 | 2.99E-06 | 0.542086 | 0        | 0.695731 | 42.41041 | 38.50399 | 12.05975 |
| 8297 | LOC119625 | 4.213221 | 6.235845 | 1.881771 | 3.313818 | 0.00092  | 0.002949 | 0        | 0        | 0        | 17.85702 | 6.417332 | 1.004979 |
| 7461 | LOC103215 | 4.065109 | 6.230311 | 1.741621 | 3.577306 | 0.000347 | 0.001237 | 0        | 0        | 0        | 8.928508 | 6.417332 | 9.044815 |
| 8234 | LOC119626 | 4.197718 | 6.230242 | 1.867639 | 3.335892 | 0.00085  | 0.002745 | 0        | 0        | 0        | 15.62489 | 8.556443 | 1.004979 |
| 7780 | LOC103247 | 4.176193 | 6.229064 | 1.794903 | 3.470417 | 0.00052  | 0.001776 | 0        | 0        | 0        | 15.62489 | 6.417332 | 3.014938 |
| 7468 | LOC119627 | 4.049606 | 6.226095 | 1.74226  | 3.573574 | 0.000352 | 0.001254 | 0        | 0        | 0        | 6.696381 | 8.556443 | 9.044815 |



|       |           |          |          |           |          |          |          |          |          |          |          |          |          |
|-------|-----------|----------|----------|-----------|----------|----------|----------|----------|----------|----------|----------|----------|----------|
| 7439  | LOC103214 | 4.086634 | 6.224301 | 1.736042  | 3.585534 | 0.000337 | 0.001203 | 0        | 0        | 0        | 8.928508 | 8.556443 | 7.034856 |
| 8222  | LOC119627 | 4.166713 | 6.220665 | 1.862239  | 3.340423 | 0.000837 | 0.002705 | 0        | 0        | 0        | 11.16063 | 12.83466 | 1.004979 |
| 7488  | LOC103235 | 4.071132 | 6.22016  | 1.743751  | 3.567115 | 0.000361 | 0.001281 | 0        | 0        | 0        | 6.696381 | 10.69555 | 7.034856 |
| 8264  | LOC103235 | 4.15121  | 6.216583 | 1.869849  | 3.324645 | 0.000885 | 0.002848 | 0        | 0        | 0        | 8.928508 | 14.97377 | 1.004979 |
| 4530  | LOC119618 | 15.11084 | 6.207831 | 1.242904  | 4.994616 | 5.90E-07 | 3.46E-06 | 0        | 0.547412 | 0.695731 | 35.71403 | 40.6431  | 13.06473 |
| 6191  | DBH       | 8.065315 | 6.196574 | 1.519069  | 4.079191 | 4.52E-05 | 0.000194 | 0        | 0        | 0.695731 | 24.5534  | 17.11289 | 6.029877 |
| 6952  | RGS1      | 7.940869 | 6.171408 | 1.643453  | 3.755146 | 0.000173 | 0.000662 | 0        | 0        | 0.695731 | 24.5534  | 21.39111 | 1.004979 |
| 9326  | LOC119624 | 4.014719 | 6.170697 | 2.04041   | 3.024243 | 0.002493 | 0.007105 | 0        | 0        | 0        | 13.39276 | 10.69555 | 0        |
| 8039  | TMEM176   | 3.987171 | 6.168855 | 1.813412  | 3.401795 | 0.000669 | 0.002214 | 0        | 0        | 0        | 15.62489 | 4.278221 | 4.019918 |
| 7843  | LOC103236 | 3.845082 | 6.161758 | 1.783464  | 3.454939 | 0.00055  | 0.001866 | 0        | 0        | 0        | 4.464254 | 8.556443 | 10.04979 |
| 9406  | LOC119620 | 3.983714 | 6.16119  | 2.04968   | 3.005927 | 0.002648 | 0.007483 | 0        | 0        | 0        | 8.928508 | 14.97377 | 0        |
| 7673  | CAPN13    | 3.919138 | 6.158747 | 1.758937  | 3.501403 | 0.000463 | 0.001604 | 0        | 0        | 0        | 8.928508 | 8.556443 | 6.029877 |
| 4427  | LOC119627 | 14.48522 | 6.158198 | 1.217277  | 5.058995 | 4.21E-07 | 2.53E-06 | 0        | 0.547412 | 0.695731 | 33.4819  | 32.08666 | 20.09959 |
| 6090  | LOC103235 | 7.731009 | 6.157857 | 1.492126  | 4.126901 | 3.68E-05 | 0.000161 | 0        | 0.547412 | 0        | 13.39276 | 21.39111 | 11.05477 |
| 7837  | FRG2      | 3.866607 | 6.156118 | 1.781056  | 3.456442 | 0.000547 | 0.001857 | 0        | 0        | 0        | 4.464254 | 10.69555 | 8.039836 |
| 6134  | CLEC10A   | 7.740226 | 6.156001 | 1.500533  | 4.102544 | 4.09E-05 | 0.000177 | 0        | 0        | 0.695731 | 11.16063 | 23.53022 | 11.05477 |
| 6373  | LOC119628 | 7.8102   | 6.154942 | 1.541387  | 3.99312  | 6.52E-05 | 0.000272 | 0.542086 | 0        | 0        | 15.62489 | 25.66933 | 5.024897 |
| 7728  | CYP8B1    | 3.903635 | 6.154466 | 1.766731  | 3.483533 | 0.000495 | 0.001702 | 0        | 0        | 0        | 6.696381 | 10.69555 | 6.029877 |
| 6411  | LOC119625 | 7.820305 | 6.153213 | 1.548116  | 3.974647 | 7.05E-05 | 0.000292 | 0        | 0        | 0.695731 | 13.39276 | 27.80844 | 5.024897 |
| 8161  | LOC103235 | 3.962188 | 6.151037 | 1.830142  | 3.360962 | 0.000777 | 0.00253  | 0        | 0        | 0        | 8.928508 | 12.83466 | 2.009959 |
| 7913  | LOC103246 | 3.92516  | 6.149326 | 1.790497  | 3.434425 | 0.000594 | 0.001995 | 0        | 0        | 0        | 6.696381 | 12.83466 | 4.019918 |
| 8244  | TASL      | 3.946686 | 6.147264 | 1.844645  | 3.332493 | 0.000861 | 0.002776 | 0        | 0        | 0        | 6.696381 | 14.97377 | 2.009959 |
| 8096  | LOC119627 | 3.909658 | 6.145906 | 1.817133  | 3.382199 | 0.000719 | 0.002361 | 0        | 0        | 0        | 4.464254 | 14.97377 | 4.019918 |
| 362   | KCND3     | 169.0222 | 6.131888 | 0.377424  | 16.24668 | 2.36E-59 | 1.73E-57 | 1.084173 | 5.474118 | 8.348776 | 319.1942 | 327.2839 | 352.7478 |
| 6212  | LOC103248 | 7.514176 | 6.125635 | 1.505742  | 4.068183 | 4.74E-05 | 0.000203 | 0        | 0        | 0.695731 | 8.928508 | 21.39111 | 14.06971 |
| 6360  | LY6K      | 7.622066 | 6.121102 | 1.530431  | 3.999593 | 6.35E-05 | 0.000265 | 0        | 0.547412 | 0        | 15.62489 | 23.53022 | 6.029877 |
| 6361  | DCAF4L2   | 7.622066 | 6.121102 | 1.530431  | 3.999593 | 6.35E-05 | 0.000265 | 0        | 0.547412 | 0        | 15.62489 | 23.53022 | 6.029877 |
| 6336  | KCNJ3     | 7.47353  | 6.100077 | 1.520893  | 4.010853 | 6.05E-05 | 0.000254 | 0        | 0.547412 | 0        | 24.5534  | 10.69555 | 9.044815 |
| 8679  | LOC103235 | 3.825697 | 6.095769 | 1.899838  | 3.208573 | 0.001334 | 0.004086 | 0        | 0        | 0        | 13.39276 | 8.556443 | 1.004979 |
| 8226  | FCRL3     | 3.804172 | 6.095558 | 1.825646  | 3.33885  | 0.000841 | 0.002719 | 0        | 0        | 0        | 13.39276 | 6.417332 | 3.014938 |
| 8006  | SLN       | 3.751641 | 6.090171 | 1.785823  | 3.410288 | 0.000649 | 0.002155 | 0        | 0        | 0        | 8.928508 | 8.556443 | 5.024897 |
| 8171  | LOC103235 | 3.788669 | 6.090095 | 1.815241  | 3.354979 | 0.000794 | 0.002582 | 0        | 0        | 0        | 11.16063 | 8.556443 | 3.014938 |
| 8362  | OLIG1     | 3.662083 | 6.087808 | 1.847929  | 3.294394 | 0.000986 | 0.003136 | 0        | 0        | 0        | 2.232127 | 10.69555 | 9.044815 |
| 8110  | LOC103225 | 3.699111 | 6.087492 | 1.8002819 | 3.376652 | 0.000734 | 0.002405 | 0        | 0        | 0        | 4.464254 | 10.69555 | 7.034856 |
| 8067  | AKNAD1    | 3.736139 | 6.085727 | 1.793691  | 3.392852 | 0.000692 | 0.002279 | 0        | 0        | 0        | 6.696381 | 10.69555 | 5.024897 |
| 8068  | KCNS2     | 3.736139 | 6.085727 | 1.793691  | 3.392852 | 0.000692 | 0.002279 | 0        | 0        | 0        | 6.696381 | 10.69555 | 5.024897 |
| 8069  | LOC119627 | 3.736139 | 6.085727 | 1.793691  | 3.392852 | 0.000692 | 0.002279 | 0        | 0        | 0        | 6.696381 | 10.69555 | 5.024897 |
| 8187  | LOC119627 | 3.773167 | 6.085321 | 1.816038  | 3.350879 | 0.000806 | 0.002616 | 0        | 0        | 0        | 8.928508 | 10.69555 | 3.014938 |
| 8188  | CLEC4D    | 3.773167 | 6.085321 | 1.816038  | 3.350879 | 0.000806 | 0.002616 | 0        | 0        | 0        | 8.928508 | 10.69555 | 3.014938 |
| 6550  | LOC119627 | 7.411256 | 6.082138 | 1.551763  | 3.919501 | 8.87E-05 | 0.00036  | 0        | 0        | 0.695731 | 8.928508 | 27.80844 | 7.034856 |
| 8954  | LOC119619 | 3.763686 | 6.078264 | 1.942073  | 3.129781 | 0.001749 | 0.005193 | 0        | 0        | 0        | 4.464254 | 17.11289 | 1.004979 |
| 8955  | LOC119627 | 3.763686 | 6.078264 | 1.942073  | 3.129781 | 0.001749 | 0.005193 | 0        | 0        | 0        | 4.464254 | 17.11289 | 1.004979 |
| 8416  | LOC119615 | 3.742161 | 6.077659 | 1.854419  | 3.277393 | 0.001048 | 0.00331  | 0        | 0        | 0        | 4.464254 | 14.97377 | 3.014938 |
| 8755  | PSKH2     | 3.726658 | 6.075044 | 1.906716  | 3.18613  | 0.001442 | 0.004377 | 0        | 0        | 0        | 2.232127 | 17.11289 | 3.014938 |
| 8756  | SERTM2    | 3.726658 | 6.075044 | 1.906716  | 3.18613  | 0.001442 | 0.004377 | 0        | 0        | 0        | 2.232127 | 17.11289 | 3.014938 |
| 7927  | PNLIPRP1  | 7.330123 | 6.064898 | 1.767694  | 3.430966 | 0.000601 | 0.002017 | 0        | 0.547412 | 0        | 15.62489 | 27.80844 | 0        |
| 6452  | GRHL2     | 7.330753 | 6.064027 | 1.531527  | 3.959465 | 7.51E-05 | 0.00031  | 0        | 0        | 0.695731 | 24.5534  | 10.69555 | 8.039836 |
| 5078  | RAB17     | 13.12655 | 6.038063 | 1.300195  | 4.643968 | 3.42E-06 | 1.79E-05 | 0        | 1.094824 | 0        | 31.24978 | 36.36488 | 10.04979 |
| 8788  | AQP10     | 3.652178 | 6.032355 | 1.898464  | 3.177492 | 0.001486 | 0.004494 | 0        | 0        | 0        | 15.62489 | 4.278221 | 2.009959 |
| 9870  | LOC119618 | 3.642698 | 6.029703 | 2.087569  | 2.888385 | 0.003872 | 0.010428 | 0        | 0        | 0        | 11.16063 | 10.69555 | 0        |
| 9871  | CCDC185   | 3.642698 | 6.029703 | 2.087569  | 2.888385 | 0.003872 | 0.010428 | 0        | 0        | 0        | 11.16063 | 10.69555 | 0        |
| 9872  | KRT34     | 3.642698 | 6.029703 | 2.087569  | 2.888385 | 0.003872 | 0.010428 | 0        | 0        | 0        | 11.16063 | 10.69555 | 0        |
| 8460  | TACR3     | 3.61515  | 6.029678 | 1.846666  | 3.26517  | 0.001094 | 0.003438 | 0        | 0        | 0        | 13.39276 | 4.278221 | 4.019918 |
| 8658  | LOC103248 | 3.636675 | 6.025661 | 1.874733  | 3.214144 | 0.001308 | 0.004017 | 0        | 0        | 0        | 13.39276 | 6.417332 | 2.009959 |
| 8659  | OPRPN     | 3.636675 | 6.025661 | 1.874733  | 3.214144 | 0.001308 | 0.004017 | 0        | 0        | 0        | 13.39276 | 6.417332 | 2.009959 |
| 8240  | SPATA21   | 3.562619 | 6.024933 | 1.806644  | 3.334876 | 0.000853 | 0.002753 | 0        | 0        | 0        | 8.928508 | 6.417332 | 6.029877 |
| 9933  | CGAS      | 3.627195 | 6.024512 | 2.093097  | 2.878276 | 0.003999 | 0.010701 | 0        | 0        | 0        | 8.928508 | 12.83466 | 0        |
| 6436  | KLRD1     | 6.968636 | 6.023344 | 1.518761  | 3.96596  | 7.31E-05 | 0.000302 | 0        | 0        | 0.695731 | 8.928508 | 17.11289 | 15.07469 |
| 6511  | LOC103228 | 7.132251 | 6.020886 | 1.53033   | 3.93437  | 8.34E-05 | 0.000341 | 0        | 0        | 0.695731 | 20.08914 | 14.97377 | 7.034856 |
| 8249  | SOX17     | 3.547117 | 6.020061 | 1.807573  | 3.330465 | 0.000867 | 0.002794 | 0        | 0        | 0        | 6.696381 | 8.556443 | 6.029877 |
| 1797  | LOC119625 | 43.93032 | 6.017214 | 0.711175  | 8.460948 | 2.65E-17 | 3.92E-16 | 3.252518 | 0.547412 | 0        | 60.26743 | 91.98176 | 107.5328 |
| 10191 | HPGDS     | 3.59619  | 6.015456 | 2.135218  | 2.817256 | 0.004844 | 0.012635 | 0        | 0        | 0        | 4.464254 | 17.11289 | 0        |
| 4913  | SCARA5    | 12.87897 | 6.014946 | 1.269629  | 4.737561 | 2.16E-06 | 1.17E-05 | 0        | 1.094824 | 0        | 29.01765 | 32.08666 | 15.07469 |
| 6565  | LOC103222 | 7.060135 | 6.013752 | 1.536187  | 3.914726 | 9.05E-05 | 0.000367 | 0.542086 | 0        | 0        | 13.39276 | 21.39111 | 7.034856 |
| 6592  | LOC119628 | 7.033212 | 6.012497 | 1.540005  | 3.904206 | 9.45E-05 | 0.000381 | 0        | 0        | 0.695731 | 8.928508 | 23.53022 | 9.044815 |
| 8703  | LOC103238 | 3.590167 | 6.010393 | 1.877626  | 3.20106  | 0.001369 | 0.004182 | 0        | 0        | 0        | 6.696381 | 12.83466 | 2.009959 |
| 8704  | LOC103247 | 3.590167 | 6.010393 | 1.877626  | 3.20106  | 0.001369 | 0.004182 | 0        | 0        | 0        | 6.696381 | 12.83466 | 2.009959 |
| 8525  | DDX53     | 3.553139 | 6.009674 | 1.850486  | 3.247619 | 0.001164 | 0.003629 | 0        | 0        | 0        | 4.464254 | 12.83466 | 4.019918 |
| 6853  | KLHL40    | 7.076263 | 6.009363 | 1.583827  | 3.794204 | 0.000148 | 0.000575 | 0        | 0        | 0.695731 | 8.928508 | 27.80844 | 5.024897 |
| 8850  | LOC119618 | 3.537637 | 6.006298 | 1.90261   | 3.156873 | 0.001595 | 0.00479  | 0        | 0        | 0        | 2.232127 | 14.97377 | 4.019918 |
| 9855  | TD RD15   | 3.522134 | 6.005058 | 2.076615  | 2.891753 | 0.003831 | 0.010335 | 0        | 0        | 0        | 0        | 17.11289 | 4.019918 |
| 9136  | DSG4      | 3.559162 | 6.004038 | 1.955195  | 3.070813 | 0.002135 | 0.006212 | 0        | 0        | 0        | 2.232127 | 17.11289 | 2.009959 |
| 7138  | LOC119620 | 6.992302 | 5.982579 | 1.623976  | 3.683908 | 0.00023  | 0.000855 | 0        | 0        | 0.695731 | 17.85702 | 21.39111 | 2.009959 |
| 5275  | CSMD1     | 13.37103 | 5.97751  | 1.318027  | 4.535196 | 5.76E-06 | 2.90E-05 | 0        | 0        | 1.391463 | 29.01765 | 42.78221 | 7.034856 |



|       |           |          |          |          |          |          |          |          |          |          |          |          |          |          |
|-------|-----------|----------|----------|----------|----------|----------|----------|----------|----------|----------|----------|----------|----------|----------|
| 6894  | ACP3      | 6.939771 | 5.97537  | 1.581723 | 3.77776  | 0.000158 | 0.00061  | 0        | 0        | 0.695731 | 13.39276 | 23.53022 | 4.019918 |          |
| 6766  | LOC119618 | 6.902743 | 5.973818 | 1.559503 | 3.830592 | 0.000128 | 0.000502 | 0        | 0        | 0.695731 | 11.16063 | 23.53022 | 6.029877 |          |
| 8533  | LOC103214 | 3.358095 | 5.951596 | 1.833755 | 3.245579 | 0.001172 | 0.003652 | 0        | 0        | 0        | 6.696381 | 6.417332 | 7.034856 |          |
| 6613  | TMEM275   | 6.717179 | 5.951337 | 1.526663 | 3.898265 | 9.69E-05 | 0.000389 | 0        | 0        | 0.695731 | 17.85702 | 10.69555 | 11.05477 |          |
| 8548  | CFHR2     | 3.395123 | 5.949431 | 1.835691 | 3.240977 | 0.001191 | 0.003705 | 0        | 0        | 0        | 8.928508 | 6.417332 | 5.024897 |          |
| 9151  | LOC119626 | 3.453676 | 5.947845 | 1.939654 | 3.066447 | 0.002166 | 0.006292 | 0        | 0        | 0        | 11.16063 | 8.556443 | 1.004979 |          |
| 9152  | LOC119627 | 3.453676 | 5.947845 | 1.939654 | 3.066447 | 0.002166 | 0.006292 | 0        | 0        | 0        | 11.16063 | 8.556443 | 1.004979 |          |
| 9153  | LOC103245 | 3.453676 | 5.947845 | 1.939654 | 3.066447 | 0.002166 | 0.006292 | 0        | 0        | 0        | 11.16063 | 8.556443 | 1.004979 |          |
| 8634  | LOC103247 | 3.342592 | 5.9464   | 1.847283 | 3.218998 | 0.001286 | 0.003961 | 0        | 0        | 0        | 4.464254 | 8.556443 | 7.034856 |          |
| 6694  | LOC119620 | 6.76023  | 5.943644 | 1.540326 | 3.858692 | 0.000114 | 0.000453 | 0        | 0        | 0.695731 | 17.85702 | 14.97377 | 7.034856 |          |
| 8715  | CELA3B    | 3.416648 | 5.943239 | 1.858246 | 3.198306 | 0.001382 | 0.004216 | 0        | 0        | 0        | 8.928508 | 8.556443 | 3.014938 |          |
| 8717  | SELE      | 3.416648 | 5.943239 | 1.858246 | 3.198306 | 0.001382 | 0.004216 | 0        | 0        | 0        | 8.928508 | 8.556443 | 3.014938 |          |
| 9173  | APOD      | 3.438173 | 5.942415 | 1.940808 | 3.061825 | 0.0022   | 0.006374 | 0        | 0        | 0        | 8.928508 | 10.69555 | 1.004979 |          |
| 9174  | IQCF6     | 3.438173 | 5.942415 | 1.940808 | 3.061825 | 0.0022   | 0.006374 | 0        | 0        | 0        | 8.928508 | 10.69555 | 1.004979 |          |
| 9175  | LOC119620 | 3.438173 | 5.942415 | 1.940808 | 3.061825 | 0.0022   | 0.006374 | 0        | 0        | 0        | 8.928508 | 10.69555 | 1.004979 |          |
| 9176  | KLRB1     | 3.438173 | 5.942415 | 1.940808 | 3.061825 | 0.0022   | 0.006374 | 0        | 0        | 0        | 8.928508 | 10.69555 | 1.004979 |          |
| 6834  | SULT2A1   | 6.781755 | 5.941784 | 1.561897 | 3.804211 | 0.000142 | 0.000553 | 0        | 0        | 0.695731 | 17.85702 | 17.11289 | 5.024897 |          |
| 9259  | TYRP1     | 3.422671 | 5.937645 | 1.952613 | 3.040871 | 0.002359 | 0.006771 | 0        | 0        | 0        | 6.696381 | 12.83466 | 1.004979 |          |
| 9260  | LOC103227 | 3.422671 | 5.937645 | 1.952613 | 3.040871 | 0.002359 | 0.006771 | 0        | 0        | 0        | 6.696381 | 12.83466 | 1.004979 |          |
| 9261  | PLA2G12B  | 3.422671 | 5.937645 | 1.952613 | 3.040871 | 0.002359 | 0.006771 | 0        | 0        | 0        | 6.696381 | 12.83466 | 1.004979 |          |
| 9262  | LOC103235 | 3.422671 | 5.937645 | 1.952613 | 3.040871 | 0.002359 | 0.006771 | 0        | 0        | 0        | 6.696381 | 12.83466 | 1.004979 |          |
| 6881  | LOC103247 | 6.75075  | 5.936971 | 1.568545 | 3.785018 | 0.000154 | 0.000594 | 0        | 0        | 0.695731 | 13.39276 | 21.39111 | 5.024897 |          |
| 9019  | ADAMDEC   | 3.348615 | 5.935199 | 1.908122 | 3.110492 | 0.001868 | 0.005506 | 0        | 0        | 0        | 2.232127 | 12.83466 | 5.024897 |          |
| 9983  | CRH       | 3.311587 | 5.934099 | 2.070711 | 2.865731 | 0.00416  | 0.011079 | 0        | 0        | 0        | 0        | 12.83466 | 7.034856 |          |
| 4889  | ADAM18    | 12.43928 | 5.912476 | 1.245191 | 4.748249 | 2.05E-06 | 1.12E-05 | 0        | 0        | 1.391463 | 22.32127 | 27.80844 | 23.11453 |          |
| 6733  | LOC119625 | 6.503174 | 5.902808 | 1.535979 | 3.843026 | 0.000122 | 0.00048  | 0        | 0        | 0.695731 | 11.16063 | 17.11289 | 10.04979 |          |
| 6773  | LOC103224 | 6.514595 | 5.901298 | 1.541991 | 3.827064 | 0.00013  | 0.000509 | 0.542086 | 0        | 0        | 0        | 13.39276 | 17.11289 | 8.039836 |
| 6767  | BFSP2     | 6.540202 | 5.901233 | 1.541006 | 3.829467 | 0.000128 | 0.000505 | 0        | 0        | 0.695731 | 13.39276 | 17.11289 | 8.039836 |          |
| 7033  | LOC103235 | 6.598756 | 5.899899 | 1.585102 | 3.722093 | 0.000198 | 0.000747 | 0        | 0        | 0.695731 | 15.62489 | 19.252   | 4.019918 |          |
| 6815  | LOC103238 | 6.5247   | 5.898954 | 1.547856 | 3.811048 | 0.000138 | 0.00054  | 0        | 0        | 0.695731 | 11.16063 | 19.252   | 8.039836 |          |
| 7617  | ISX       | 6.459494 | 5.891242 | 1.673342 | 3.520644 | 0.000431 | 0.001502 | 0        | 0.547412 | 0        | 2.232127 | 29.94755 | 6.029877 |          |
| 9587  | LOC103237 | 3.29566  | 5.8862   | 1.985774 | 2.964184 | 0.003035 | 0.008416 | 0        | 0        | 0        | 15.62489 | 2.139111 | 2.009959 |          |
| 10549 | LOC103227 | 3.301682 | 5.886158 | 2.152776 | 2.734218 | 0.006253 | 0.015757 | 0        | 0        | 0        | 13.39276 | 6.417332 | 0        |          |
| 10550 | NTSR2     | 3.301682 | 5.886158 | 2.152776 | 2.734218 | 0.006253 | 0.015757 | 0        | 0        | 0        | 13.39276 | 6.417332 | 0        |          |
| 9277  | PRSS48    | 3.258632 | 5.883403 | 1.9365   | 3.038163 | 0.00238  | 0.00682  | 0        | 0        | 0        | 13.39276 | 2.139111 | 4.019918 |          |
| 10511 | SUN5      | 3.28618  | 5.879684 | 2.144181 | 2.742158 | 0.006104 | 0.015438 | 0        | 0        | 0        | 11.16063 | 8.556443 | 0        |          |
| 8949  | LOC103215 | 3.169073 | 5.879326 | 1.877076 | 3.132173 | 0.001735 | 0.005155 | 0        | 0        | 0        | 6.696381 | 4.278221 | 8.039836 |          |
| 9295  | LOC119625 | 3.280157 | 5.877705 | 1.937495 | 3.033662 | 0.002416 | 0.00691  | 0        | 0        | 0        | 13.39276 | 4.278221 | 2.009959 |          |
| 9296  | LOC103248 | 3.280157 | 5.877705 | 1.937495 | 3.033662 | 0.002416 | 0.00691  | 0        | 0        | 0        | 13.39276 | 4.278221 | 2.009959 |          |
| 6950  | SMOC2     | 6.376163 | 5.876979 | 1.565004 | 3.755248 | 0.000173 | 0.000662 | 0        | 0        | 0.695731 | 20.08914 | 6.417332 | 11.05477 |          |
| 3933  | LOC119625 | 18.24643 | 5.872193 | 1.083856 | 5.417873 | 6.03E-08 | 4.08E-07 | 0        | 0.547412 | 1.391463 | 35.71403 | 57.75599 | 14.06971 |          |
| 8858  | LRRTM3    | 3.190598 | 5.871995 | 1.861252 | 3.154864 | 0.001606 | 0.004819 | 0        | 0        | 0        | 6.696381 | 6.417332 | 6.029877 |          |
| 8859  | LOC119627 | 3.190598 | 5.871995 | 1.861252 | 3.154864 | 0.001606 | 0.004819 | 0        | 0        | 0        | 6.696381 | 6.417332 | 6.029877 |          |
| 9159  | LOC119624 | 3.264654 | 5.870746 | 1.916365 | 3.063479 | 0.002188 | 0.00635  | 0        | 0        | 0        | 11.16063 | 6.417332 | 2.009959 |          |
| 8925  | LOC119620 | 3.227626 | 5.869896 | 1.870453 | 3.138222 | 0.0017   | 0.005063 | 0        | 0        | 0        | 8.928508 | 6.417332 | 4.019918 |          |
| 8959  | LOC119627 | 3.175096 | 5.866629 | 1.874998 | 3.128872 | 0.001755 | 0.005207 | 0        | 0        | 0        | 4.464254 | 8.556443 | 6.029877 |          |
| 6911  | MOG       | 6.403711 | 5.865219 | 1.554744 | 3.772466 | 0.000162 | 0.000622 | 0        | 0        | 0.695731 | 17.85702 | 12.83466 | 7.034856 |          |
| 9138  | LOC103235 | 3.249152 | 5.86474  | 1.910899 | 3.0691   | 0.002147 | 0.006246 | 0        | 0        | 0        | 8.928508 | 8.556443 | 2.009959 |          |
| 9139  | CLEC12A   | 3.249152 | 5.86474  | 1.910899 | 3.0691   | 0.002147 | 0.006246 | 0        | 0        | 0        | 8.928508 | 8.556443 | 2.009959 |          |
| 8944  | LOC119627 | 3.212124 | 5.864437 | 1.871669 | 3.133266 | 0.001729 | 0.005138 | 0        | 0        | 0        | 6.696381 | 8.556443 | 4.019918 |          |
| 398   | GPIHBP1   | 139.8037 | 5.863908 | 0.373137 | 15.71518 | 1.19E-55 | 7.95E-54 | 2.710432 | 5.474118 | 6.261582 | 272.3195 | 271.6671 | 280.3893 |          |
| 10733 | ANKRD53   | 3.239671 | 5.863328 | 2.184359 | 2.684233 | 0.00727  | 0.018003 | 0        | 0        | 0        | 4.464254 | 14.97377 | 0        |          |
| 7819  | FREM3     | 6.437282 | 5.862284 | 1.693785 | 3.461056 | 0.000538 | 0.001829 | 0        | 0        | 0.695731 | 13.39276 | 23.53022 | 1.004979 |          |
| 6867  | LOC119618 | 6.335678 | 5.860922 | 1.546649 | 3.789433 | 0.000151 | 0.000584 | 0        | 0        | 0.695731 | 11.16063 | 17.11289 | 9.044815 |          |
| 9049  | LOC119628 | 3.196621 | 5.859578 | 1.892243 | 3.096663 | 0.001957 | 0.00575  | 0        | 0        | 0        | 4.464254 | 10.69555 | 4.019918 |          |
| 9205  | GPR20     | 3.233649 | 5.859536 | 1.918853 | 3.053666 | 0.002261 | 0.006526 | 0        | 0        | 0        | 6.696381 | 10.69555 | 2.009959 |          |
| 9207  | LOC103225 | 3.233649 | 5.859536 | 1.918853 | 3.053666 | 0.002261 | 0.006526 | 0        | 0        | 0        | 6.696381 | 10.69555 | 2.009959 |          |
| 9208  | LOC103230 | 3.233649 | 5.859536 | 1.918853 | 3.053666 | 0.002261 | 0.006526 | 0        | 0        | 0        | 6.696381 | 10.69555 | 2.009959 |          |
| 11044 | IL26      | 3.224169 | 5.859365 | 2.238005 | 2.618119 | 0.008842 | 0.021283 | 0        | 0        | 0        | 2.232127 | 17.11289 | 0        |          |
| 9371  | LOC103214 | 3.218146 | 5.855117 | 1.942616 | 3.014037 | 0.002578 | 0.007313 | 0        | 0        | 0        | 4.464254 | 12.83466 | 2.009959 |          |
| 9372  | LOC103244 | 3.218146 | 5.855117 | 1.942616 | 3.014037 | 0.002578 | 0.007313 | 0        | 0        | 0        | 4.464254 | 12.83466 | 2.009959 |          |
| 172   | SUCNR1    | 257.4266 | 5.84657  | 0.276496 | 21.14523 | 3.05E-99 | 4.72E-97 | 9.757555 | 8.211177 | 8.348776 | 499.9964 | 502.691  | 515.5545 |          |
| 5125  | TMEM244   | 11.66664 | 5.832776 | 1.263517 | 4.616301 | 3.91E-06 | 2.03E-05 | 0        | 0.547412 | 0.695731 | 29.01765 | 25.66933 | 14.06971 |          |
| 5526  | ABC85     | 11.37496 | 5.829877 | 1.324664 | 4.401022 | 1.08E-05 | 5.18E-05 | 0        | 1.094824 | 0        | 35.71403 | 21.39111 | 10.04979 |          |
| 5222  | SLAMF7    | 11.65716 | 5.827897 | 1.275407 | 4.569439 | 4.89E-06 | 2.49E-05 | 0        | 0.547412 | 0.695731 | 24.5534  | 32.08666 | 12.05975 |          |
| 3385  | COL6A6    | 23.79716 | 5.827198 | 0.978339 | 5.956217 | 2.58E-09 | 2.03E-08 | 0        | 0.547412 | 2.087194 | 51.33892 | 72.72976 | 16.07967 |          |
| 7276  | LOC119627 | 6.273243 | 5.824391 | 1.599837 | 3.640616 | 0.000272 | 0.000994 | 0        | 0        | 0.695731 | 20.08914 | 12.83466 | 4.019918 |          |
| 7049  | LOC119625 | 6.094125 | 5.821559 | 1.568081 | 3.712537 | 0.000205 | 0.000774 | 0        | 0        | 0.695731 | 6.696381 | 17.11289 | 12.05975 |          |
| 7265  | LOC119620 | 6.25774  | 5.821044 | 1.596183 | 3.646851 | 0.000265 | 0.000971 | 0        | 0        | 0.695731 | 17.85702 | 14.97377 | 4.019918 |          |
| 2503  | LOC103225 | 29.20455 | 5.820255 | 0.816748 | 7.126134 | 1.03E-12 | 1.10E-11 | 0        | 0.547412 | 2.782925 | 62.49956 | 64.17332 | 45.22408 |          |
| 5407  | CDH9      | 11.27592 | 5.820229 | 1.304917 | 4.460228 | 8.19E-06 | 4.03E-05 | 0        | 1.094824 | 0        | 24.5534  | 29.94755 | 12.05975 |          |
| 6999  | LOC103224 | 6.168181 | 5.817861 | 1.55878  | 3.732317 | 0.00019  | 0.000721 | 0        | 0        | 0.695731 | 11.16063 | 17.11289 | 8.039836 |          |
| 7616  | LOC119627 | 6.24826  | 5.81725  | 1.6522   | 3.520911 | 0.00043  | 0.001501 | 0        | 0        | 0.695731 | 13.39276 | 21.39111 | 2.009959 |          |
| 7431  | SLC2A7    | 6.195729 | 5.811246 | 1.620252 | 3.58663  | 0.000335 | 0.001198 | 0        | 0        | 0.695731 | 8.928508 | 23.53022 | 4.019918 |          |



|       |           |          |          |          |          |           |          |          |          |          |          |          |          |
|-------|-----------|----------|----------|----------|----------|-----------|----------|----------|----------|----------|----------|----------|----------|
| 9939  | FOX12     | 3.11266  | 5.797316 | 2.015065 | 2.876987 | 0.004015  | 0.010738 | 0        | 0        | 0        | 13.39276 | 4.278221 | 1.004979 |
| 9940  | LOC103225 | 3.11266  | 5.797316 | 2.015065 | 2.876987 | 0.004015  | 0.010738 | 0        | 0        | 0        | 13.39276 | 4.278221 | 1.004979 |
| 5336  | TAFAS     | 11.74389 | 5.796749 | 1.288666 | 4.498255 | 6.85E-06  | 3.41E-05 | 0        | 0        | 1.391463 | 33.4819  | 23.53022 | 12.05975 |
| 9435  | LOC119618 | 3.075632 | 5.792777 | 1.931237 | 2.999516 | 0.002704  | 0.007618 | 0        | 0        | 0        | 11.16063 | 4.278221 | 3.014938 |
| 9436  | LOC103235 | 3.075632 | 5.792777 | 1.931237 | 2.999516 | 0.002704  | 0.007618 | 0        | 0        | 0        | 11.16063 | 4.278221 | 3.014938 |
| 7493  | AARD      | 6.115226 | 5.791584 | 1.625362 | 3.563258 | 0.000366  | 0.0013   | 0        | 0        | 0.695731 | 24.5534  | 6.417332 | 5.024897 |
| 9813  | LOC103225 | 3.097158 | 5.789913 | 1.994998 | 2.902215 | 0.003705  | 0.010038 | 0        | 0        | 0        | 11.16063 | 6.417332 | 1.004979 |
| 9191  | LOC119618 | 3.023102 | 5.787715 | 1.893441 | 3.056718 | 0.002238  | 0.006472 | 0        | 0        | 0        | 6.696381 | 6.417332 | 5.024897 |
| 9192  | LOC103247 | 3.023102 | 5.787715 | 1.893441 | 3.056718 | 0.002238  | 0.006472 | 0        | 0        | 0        | 6.696381 | 6.417332 | 5.024897 |
| 7562  | LOC103235 | 6.096529 | 5.786133 | 1.635698 | 3.537409 | 0.000404  | 0.001421 | 0        | 0.547412 | 0        | 22.32127 | 10.69555 | 3.014938 |
| 9329  | FABP2     | 3.06013  | 5.786047 | 1.913507 | 3.023792 | 0.002496  | 0.007113 | 0        | 0        | 0        | 8.928508 | 6.417332 | 3.014938 |
| 9330  | LOC103225 | 3.06013  | 5.786047 | 1.913507 | 3.023792 | 0.002496  | 0.007113 | 0        | 0        | 0        | 8.928508 | 6.417332 | 3.014938 |
| 9789  | MFS06L    | 3.081655 | 5.783487 | 1.990141 | 2.906069 | 0.00366   | 0.00994  | 0        | 0        | 0        | 8.928508 | 8.556443 | 1.004979 |
| 9350  | LOC103247 | 3.044627 | 5.780226 | 1.914915 | 3.018529 | 0.00254   | 0.007221 | 0        | 0        | 0        | 6.696381 | 8.556443 | 3.014938 |
| 9351  | IDO2      | 3.044627 | 5.780226 | 1.914915 | 3.018529 | 0.00254   | 0.007221 | 0        | 0        | 0        | 6.696381 | 8.556443 | 3.014938 |
| 9853  | REG3G     | 3.066152 | 5.777848 | 1.998005 | 2.891809 | 0.00383   | 0.010334 | 0        | 0        | 0        | 6.696381 | 10.69555 | 1.004979 |
| 9854  | KLHL6     | 3.066152 | 5.777848 | 1.998005 | 2.891809 | 0.00383   | 0.010334 | 0        | 0        | 0        | 6.696381 | 10.69555 | 1.004979 |
| 7292  | LOC119618 | 6.028495 | 5.776168 | 1.588136 | 3.637074 | 0.000276  | 0.001005 | 0        | 0.547412 | 0        | 15.62489 | 14.97377 | 5.024897 |
| 9500  | FOXR1     | 3.029124 | 5.775185 | 1.935536 | 2.983765 | 0.002847  | 0.007967 | 0        | 0        | 0        | 4.464254 | 10.69555 | 3.014938 |
| 9501  | PGLYRP2   | 3.029124 | 5.775185 | 1.935536 | 2.983765 | 0.002847  | 0.007967 | 0        | 0        | 0        | 4.464254 | 10.69555 | 3.014938 |
| 7313  | LOC103225 | 6.012105 | 5.773351 | 1.590445 | 3.630022 | 0.000283  | 0.00103  | 0.542086 | 0        | 0        | 13.39276 | 17.11289 | 5.024897 |
| 7536  | IL10      | 6.059238 | 5.772854 | 1.627385 | 3.547318 | 0.000389  | 0.001373 | 0        | 0        | 0.695731 | 13.39276 | 19.252   | 3.014938 |
| 10702 | ZNF804A   | 2.976594 | 5.771929 | 2.144523 | 2.691474 | 0.007114  | 0.017671 | 0        | 0        | 0        | 0        | 12.83466 | 5.024897 |
| 9793  | PMP2      | 3.013622 | 5.771044 | 1.986288 | 2.905442 | 0.003667  | 0.009954 | 0        | 0        | 0        | 2.232127 | 12.83466 | 3.014938 |
| 9795  | ERP27     | 3.013622 | 5.771044 | 1.986288 | 2.905442 | 0.003667  | 0.009954 | 0        | 0        | 0        | 2.232127 | 12.83466 | 3.014938 |
| 7352  | CCKBR     | 6.02221  | 5.770793 | 1.595981 | 3.615829 | 0.000299  | 0.001083 | 0        | 0        | 0.695731 | 11.16063 | 19.252   | 5.024897 |
| 10316 | LOC119625 | 3.035147 | 5.769398 | 2.071401 | 2.785264 | 0.005348  | 0.013784 | 0        | 0        | 0        | 2.232127 | 14.97377 | 1.004979 |
| 5502  | ADGB      | 11.03411 | 5.752749 | 1.304626 | 4.4095   | 1.04E-05  | 5.01E-05 | 0        | 0.547412 | 0.695731 | 13.39276 | 38.50399 | 13.06473 |
| 3378  | CSMD3     | 22.90175 | 5.750838 | 0.964422 | 5.96299  | 2.48E-09  | 1.95E-08 | 0        | 0        | 2.782925 | 58.0353  | 53.47777 | 23.11453 |
| 3988  | RD3       | 16.97901 | 5.746076 | 1.067542 | 5.382529 | 7.34E-08  | 4.90E-07 | 0        | 0        | 2.087194 | 40.17829 | 38.50399 | 21.10457 |
| 7506  | LOC103247 | 5.901222 | 5.734862 | 1.611626 | 3.558432 | 0.000373  | 0.001321 | 0        | 0        | 0.695731 | 17.85702 | 12.83466 | 4.019918 |
| 7330  | ICAM4     | 5.79616  | 5.729533 | 1.581533 | 3.622773 | 0.000291  | 0.001057 | 0        | 0        | 0.695731 | 8.928508 | 17.11289 | 8.039836 |
| 1451  | SULT1C2   | 5.48577  | 5.728027 | 0.611893 | 9.361162 | 7.89E-21  | 1.44E-19 | 0        | 1.094824 | 5.565851 | 100.4457 | 115.512  | 106.5278 |
| 5717  | GLP2R     | 10.59991 | 5.727509 | 1.326833 | 4.316676 | 1.58E-05  | 7.37E-05 | 0        | 1.094824 | 0        | 26.78552 | 25.66933 | 10.04979 |
| 5876  | CA8       | 10.57493 | 5.724815 | 1.354029 | 4.227984 | 2.36E-05  | 0.000107 | 0        | 1.094824 | 0        | 20.08914 | 34.22577 | 8.039836 |
| 450   | LOC119625 | 131.6532 | 5.724753 | 0.379313 | 15.09242 | 1.82E-51  | 1.07E-49 | 7.589209 | 2.737059 | 4.174388 | 276.7837 | 252.4151 | 246.22   |
| 7958  | LOC103235 | 5.749652 | 5.723149 | 1.671994 | 3.422949 | 0.000619  | 0.002069 | 0        | 0        | 0.695731 | 2.232127 | 23.53022 | 8.039836 |
| 5653  | LOC103247 | 11.2414  | 5.722947 | 1.316982 | 4.345501 | 1.39E-05  | 6.53E-05 | 0        | 0        | 1.391463 | 33.4819  | 23.53022 | 9.044815 |
| 5437  | TACSTD2   | 11.13634 | 5.722769 | 1.287614 | 4.444475 | 8.81E-06  | 4.31E-05 | 0        | 0        | 1.391463 | 24.5534  | 27.80844 | 13.06473 |
| 11301 | LOC103235 | 2.945164 | 5.720283 | 2.235414 | 2.558936 | 0.010499  | 0.024699 | 0        | 0        | 0        | 13.39276 | 4.278221 | 0        |
| 5421  | LTB       | 10.80161 | 5.717903 | 1.28465  | 4.450942 | 8.55E-06  | 4.19E-05 | 0        | 0.547412 | 0.695731 | 31.24978 | 19.252   | 13.06473 |
| 5898  | CAMK4     | 11.15441 | 5.706361 | 1.353915 | 4.214711 | 2.50E-05  | 0.000113 | 0        | 0        | 1.391463 | 17.85702 | 40.6431  | 7.034856 |
| 9850  | LOC103247 | 2.892633 | 5.697721 | 1.969906 | 2.892382 | 0.003823  | 0.010319 | 0        | 0        | 0        | 8.928508 | 6.417332 | 2.009959 |
| 3946  | LOC103225 | 15.58914 | 5.694448 | 1.052447 | 5.410674 | 6.28E-08  | 4.23E-07 | 1.084173 | 0        | 0.695731 | 37.94616 | 25.66933 | 28.13943 |
| 9715  | LOC119625 | 2.840102 | 5.692436 | 1.946011 | 2.925181 | 0.003443  | 0.009419 | 0        | 0        | 0        | 4.464254 | 8.556443 | 4.019918 |
| 9716  | LOC119625 | 2.840102 | 5.692436 | 1.946011 | 2.925181 | 0.003443  | 0.009419 | 0        | 0        | 0        | 4.464254 | 8.556443 | 4.019918 |
| 9717  | LOC103225 | 2.840102 | 5.692436 | 1.946011 | 2.925181 | 0.003443  | 0.009419 | 0        | 0        | 0        | 4.464254 | 8.556443 | 4.019918 |
| 9881  | LOC103224 | 2.87713  | 5.691473 | 1.971542 | 2.886812 | 0.003892  | 0.010466 | 0        | 0        | 0        | 6.696381 | 8.556443 | 2.009959 |
| 9882  | HTR2B     | 2.87713  | 5.691473 | 1.971542 | 2.886812 | 0.003892  | 0.010466 | 0        | 0        | 0        | 6.696381 | 8.556443 | 2.009959 |
| 9883  | LOC103215 | 2.87713  | 5.691473 | 1.971542 | 2.886812 | 0.003892  | 0.010466 | 0        | 0        | 0        | 6.696381 | 8.556443 | 2.009959 |
| 9884  | FMO2      | 2.87713  | 5.691473 | 1.971542 | 2.886812 | 0.003892  | 0.010466 | 0        | 0        | 0        | 6.696381 | 8.556443 | 2.009959 |
| 9885  | LOC103235 | 2.87713  | 5.691473 | 1.971542 | 2.886812 | 0.003892  | 0.010466 | 0        | 0        | 0        | 6.696381 | 8.556443 | 2.009959 |
| 7380  | SPEM2     | 5.597033 | 5.690004 | 1.577136 | 3.607809 | 0.000309  | 0.001112 | 0.542086 | 0        | 0        | 11.16063 | 12.83466 | 9.044815 |
| 10047 | LOC103235 | 2.8246   | 5.687191 | 1.994503 | 2.851433 | 0.004352  | 0.011515 | 0        | 0        | 0        | 2.232127 | 10.69555 | 4.019918 |
| 10048 | LOC103235 | 2.8246   | 5.687191 | 1.994503 | 2.851433 | 0.004352  | 0.011515 | 0        | 0        | 0        | 2.232127 | 10.69555 | 4.019918 |
| 8307  | LOC103235 | 5.724245 | 5.687038 | 1.717426 | 3.311374 | 0.000928  | 0.002971 | 0        | 0        | 0.695731 | 13.39276 | 19.252   | 1.004979 |
| 10030 | ANHX      | 2.861628 | 5.686143 | 1.991814 | 2.854756 | 0.004307  | 0.011411 | 0        | 0        | 0        | 4.464254 | 10.69555 | 2.009959 |
| 10031 | LOC119624 | 2.861628 | 5.686143 | 1.991814 | 2.854756 | 0.004307  | 0.011411 | 0        | 0        | 0        | 4.464254 | 10.69555 | 2.009959 |
| 10032 | LOC119625 | 2.861628 | 5.686143 | 1.991814 | 2.854756 | 0.004307  | 0.011411 | 0        | 0        | 0        | 4.464254 | 10.69555 | 2.009959 |
| 10033 | HMGCLL1   | 2.861628 | 5.686143 | 1.991814 | 2.854756 | 0.004307  | 0.011411 | 0        | 0        | 0        | 4.464254 | 10.69555 | 2.009959 |
| 10034 | LOC119625 | 2.861628 | 5.686143 | 1.991814 | 2.854756 | 0.004307  | 0.011411 | 0        | 0        | 0        | 4.464254 | 10.69555 | 2.009959 |
| 7452  | LOC103235 | 5.619446 | 5.685029 | 1.587659 | 3.580762 | 0.000343  | 0.001222 | 0        | 0.547412 | 0        | 11.16063 | 14.97377 | 7.034856 |
| 8367  | LOC103215 | 5.684022 | 5.684327 | 1.725935 | 3.293477 | 0.00099   | 0.003144 | 0        | 0.547412 | 0        | 11.16063 | 21.39111 | 1.004979 |
| 5523  | SLC9C2    | 10.5566  | 5.683998 | 1.290814 | 4.403423 | 1.07E-05  | 5.13E-05 | 0        | 0.547412 | 0.695731 | 20.08914 | 29.94755 | 12.05975 |
| 10326 | MCHR2     | 2.846125 | 5.681945 | 2.042148 | 2.782338 | 0.005397  | 0.013893 | 0        | 0        | 0        | 2.232127 | 12.83466 | 2.009959 |
| 10327 | LOC103235 | 2.846125 | 5.681945 | 2.042148 | 2.782338 | 0.005397  | 0.013893 | 0        | 0        | 0        | 2.232127 | 12.83466 | 2.009959 |
| 11400 | LOC103214 | 2.830622 | 5.681724 | 2.239811 | 2.536697 | 0.01119   | 0.026096 | 0        | 0        | 0        | 0        | 14.97377 | 2.009959 |
| 7587  | APOA2     | 5.640972 | 5.681477 | 1.609251 | 3.53051  | 0.000415  | 0.001453 | 0        | 0.547412 | 0        | 11.16063 | 17.11289 | 5.024897 |
| 6353  | ADCY8     | 10.26146 | 5.681448 | 1.418491 | 4.005276 | 6.19E-05  | 0.000259 | 0        | 1.094824 | 0        | 20.08914 | 36.36488 | 4.019918 |
| 7867  | LOC119625 | 5.687217 | 5.680354 | 1.646338 | 3.450297 | 0.00056   | 0.001892 | 0        | 0        | 0.695731 | 11.16063 | 19.252   | 3.014938 |
| 7620  | CPB1      | 5.588441 | 5.68007  | 1.61389  | 3.51949  | 0.000432  | 0.001508 | 0        | 0.547412 | 0        | 6.696381 | 19.252   | 7.034856 |
| 7621  | CASP14    | 5.588441 | 5.68007  | 1.61389  | 3.51949  | 0.000432  | 0.001508 | 0        | 0.547412 | 0        | 6.696381 | 19.252   | 7.034856 |
| 170   | LIPH      | 288.0051 | 5.679678 | 0.267332 | 21.24581 | 3.60E-100 | 5.64E-98 | 5.96295  | 14.23271 | 13.2189  | 575.8888 | 569.0034 | 549.7238 |
| 7946  | KRT26     | 5.671714 | 5.678058 | 1.657848 | 3.424957 | 0.000615  | 0.002057 | 0        | 0        | 0.695731 | 8.928508 | 21.39111 | 3.014938 |



|       |           |          |          |          |          |          |          |          |          |          |          |          |          |
|-------|-----------|----------|----------|----------|----------|----------|----------|----------|----------|----------|----------|----------|----------|
| 8540  | UPK1A     | 5.599598 | 5.674261 | 1.749364 | 3.243613 | 0.00118  | 0.003674 | 0.542086 | 0        | 0        | 2.232127 | 27.80844 | 3.014938 |
| 4025  | LOC119621 | 15.40445 | 5.666977 | 1.058388 | 5.354345 | 8.59E-08 | 5.67E-07 | 0        | 1.094824 | 0.695731 | 29.01765 | 38.50399 | 23.11453 |
| 4998  | NRXN3     | 16.45367 | 5.662214 | 1.207529 | 4.689093 | 2.74E-06 | 1.46E-05 | 0        | 0        | 2.087194 | 42.41041 | 49.19955 | 5.024897 |
| 4364  | RGS6      | 16.06401 | 5.652994 | 1.107434 | 5.104588 | 3.32E-07 | 2.02E-06 | 0        | 0        | 2.087194 | 29.01765 | 49.19955 | 16.07967 |
| 5602  | LOC119615 | 10.5753  | 5.649805 | 1.291846 | 4.373437 | 1.22E-05 | 5.80E-05 | 0        | 0        | 1.391463 | 22.32127 | 25.66933 | 14.06971 |
| 7896  | LOC119624 | 5.560206 | 5.647737 | 1.640936 | 3.441777 | 0.000578 | 0.001946 | 0        | 0        | 0.695731 | 20.08914 | 8.556443 | 4.019918 |
| 7518  | BHMT2     | 5.470647 | 5.644358 | 1.588557 | 3.553134 | 0.000381 | 0.001346 | 0        | 0        | 0.695731 | 13.39276 | 10.69555 | 8.039836 |
| 8138  | LOC103245 | 5.550726 | 5.640154 | 1.674714 | 3.367831 | 0.000758 | 0.002475 | 0        | 0        | 0.695731 | 15.62489 | 14.97377 | 2.009959 |
| 8167  | LOC119620 | 5.510503 | 5.637041 | 1.678205 | 3.358971 | 0.000782 | 0.002547 | 0        | 0.547412 | 0        | 13.39276 | 17.11289 | 2.009959 |
| 7794  | RFTN2     | 5.513698 | 5.636358 | 1.626008 | 3.466378 | 0.000528 | 0.001799 | 0        | 0        | 0.695731 | 13.39276 | 14.97377 | 4.019918 |
| 8276  | LOC103245 | 5.479498 | 5.631685 | 1.69581  | 3.320942 | 0.000897 | 0.002882 | 0        | 0.547412 | 0        | 8.928508 | 21.39111 | 2.009959 |
| 8268  | LOC119615 | 5.504217 | 5.631571 | 1.694482 | 3.323477 | 0.000889 | 0.002859 | 0        | 0        | 0.695731 | 8.928508 | 21.39111 | 2.009959 |
| 7933  | LOC103220 | 5.482692 | 5.63099  | 1.641655 | 3.430069 | 0.000603 | 0.002022 | 0        | 0        | 0.695731 | 8.928508 | 19.252   | 4.019918 |
| 8070  | LOC103247 | 5.467189 | 5.62894  | 1.659156 | 3.392653 | 0.000692 | 0.00228  | 0        | 0        | 0.695731 | 6.696381 | 21.39111 | 4.019918 |
| 11310 | DLK1      | 2.660561 | 5.623752 | 2.200274 | 2.555932 | 0.01059  | 0.024893 | 0        | 0        | 0        | 8.928508 | 0        | 7.034856 |
| 10860 | LOC103224 | 2.756142 | 5.622739 | 2.114965 | 2.65855  | 0.007848 | 0.019211 | 0        | 0        | 0        | 13.39276 | 2.139111 | 1.004979 |
| 6172  | ACSM1     | 9.830886 | 5.62069  | 1.374531 | 4.08917  | 4.33E-05 | 0.000186 | 0        | 1.094824 | 0        | 15.62489 | 34.22577 | 8.039836 |
| 10416 | LOC119620 | 2.719114 | 5.618473 | 2.034111 | 2.762127 | 0.005743 | 0.014657 | 0        | 0        | 0        | 11.16063 | 2.139111 | 3.014938 |
| 10629 | LOC103230 | 2.740639 | 5.6132   | 2.070047 | 2.71163  | 0.006695 | 0.016746 | 0        | 0        | 0        | 11.16063 | 4.278221 | 1.004979 |
| 10182 | KLF18     | 2.703611 | 5.61012  | 1.989934 | 2.819249 | 0.004814 | 0.012568 | 0        | 0        | 0        | 8.928508 | 4.278221 | 3.014938 |
| 10093 | LOC103235 | 2.651081 | 5.605731 | 1.973774 | 2.840108 | 0.00451  | 0.011879 | 0        | 0        | 0        | 4.464254 | 6.417332 | 5.024897 |
| 10569 | LOC119624 | 2.725137 | 5.605353 | 2.054224 | 2.728696 | 0.006359 | 0.015992 | 0        | 0        | 0        | 8.928508 | 6.417332 | 1.004979 |
| 10571 | ANKRD40C  | 2.725137 | 5.605353 | 2.054224 | 2.728696 | 0.006359 | 0.015992 | 0        | 0        | 0        | 8.928508 | 6.417332 | 1.004979 |
| 6177  | ACSBG2    | 10.08077 | 5.603706 | 1.370774 | 4.087988 | 4.35E-05 | 0.000187 | 0.542086 | 0        | 0.695731 | 17.85702 | 36.36488 | 5.024897 |
| 4003  | BHLHE22   | 21.02829 | 5.603486 | 1.04298  | 5.372571 | 7.76E-08 | 5.16E-07 | 0        | 0        | 2.782925 | 53.57105 | 57.75599 | 12.05975 |
| 10134 | LOC103225 | 2.688109 | 5.603086 | 1.979366 | 2.830748 | 0.004644 | 0.01218  | 0        | 0        | 0        | 6.696381 | 6.417332 | 3.014938 |
| 10135 | LOC119615 | 2.688109 | 5.603086 | 1.979366 | 2.830748 | 0.004644 | 0.01218  | 0        | 0        | 0        | 6.696381 | 6.417332 | 3.014938 |
| 10594 | LOC103244 | 2.709634 | 5.598579 | 2.056182 | 2.722803 | 0.006473 | 0.01624  | 0        | 0        | 0        | 6.696381 | 8.556443 | 1.004979 |
| 10596 | LOC119625 | 2.709634 | 5.598579 | 2.056182 | 2.722803 | 0.006473 | 0.01624  | 0        | 0        | 0        | 6.696381 | 8.556443 | 1.004979 |
| 10597 | LOC103247 | 2.709634 | 5.598579 | 2.056182 | 2.722803 | 0.006473 | 0.01624  | 0        | 0        | 0        | 6.696381 | 8.556443 | 1.004979 |
| 10232 | LOC119624 | 2.672606 | 5.596954 | 1.993588 | 2.807478 | 0.004993 | 0.012972 | 0        | 0        | 0        | 4.464254 | 8.556443 | 3.014938 |
| 10233 | LOC119615 | 2.672606 | 5.596954 | 1.993588 | 2.807478 | 0.004993 | 0.012972 | 0        | 0        | 0        | 4.464254 | 8.556443 | 3.014938 |
| 10529 | LOC119624 | 2.657103 | 5.591728 | 2.042122 | 2.738195 | 0.006178 | 0.015591 | 0        | 0        | 0        | 2.232127 | 10.69555 | 3.014938 |
| 10531 | LOC103227 | 2.657103 | 5.591728 | 2.042122 | 2.738195 | 0.006178 | 0.015591 | 0        | 0        | 0        | 2.232127 | 10.69555 | 3.014938 |
| 10532 | LOC103237 | 2.657103 | 5.591728 | 2.042122 | 2.738195 | 0.006178 | 0.015591 | 0        | 0        | 0        | 2.232127 | 10.69555 | 3.014938 |
| 10533 | CHRNA3    | 2.657103 | 5.591728 | 2.042122 | 2.738195 | 0.006178 | 0.015591 | 0        | 0        | 0        | 2.232127 | 10.69555 | 3.014938 |
| 10534 | LOC103217 | 2.657103 | 5.591728 | 2.042122 | 2.738195 | 0.006178 | 0.015591 | 0        | 0        | 0        | 2.232127 | 10.69555 | 3.014938 |
| 7862  | AMER3     | 5.324676 | 5.589453 | 1.619649 | 3.451028 | 0.000558 | 0.001888 | 0        | 0        | 0.695731 | 13.39276 | 12.83466 | 5.024897 |
| 7863  | SOX14     | 5.324676 | 5.589453 | 1.619649 | 3.451028 | 0.000558 | 0.001888 | 0        | 0        | 0.695731 | 13.39276 | 12.83466 | 5.024897 |
| 11621 | LOC119615 | 2.6416   | 5.589165 | 2.2456   | 2.48894  | 0.012812 | 0.029311 | 0        | 0        | 0        | 0        | 12.83466 | 3.014938 |
| 8109  | PABPC1L2H | 5.346201 | 5.587476 | 1.654719 | 3.376693 | 0.000734 | 0.002405 | 0        | 0        | 0.695731 | 13.39276 | 14.97377 | 3.014938 |
| 8151  | GCSAML    | 5.330698 | 5.584445 | 1.659791 | 3.364547 | 0.000767 | 0.002501 | 0        | 0        | 0.695731 | 11.16063 | 17.11289 | 3.014938 |
| 8845  | LOC103215 | 5.296498 | 5.582801 | 1.767805 | 3.15804  | 0.001588 | 0.004774 | 0        | 0.547412 | 0        | 6.696381 | 23.53022 | 1.004979 |
| 970   | CPAMD8    | 67.47464 | 5.582098 | 0.501236 | 11.13667 | 8.32E-29 | 2.28E-27 | 1.084173 | 3.831883 | 3.478657 | 133.9276 | 136.9031 | 125.6224 |
| 8331  | LOC103245 | 5.274973 | 5.579804 | 1.688829 | 3.303948 | 0.000953 | 0.003042 | 0        | 0.547412 | 0        | 6.696381 | 21.39111 | 3.014938 |
| 8325  | LOC103245 | 5.299693 | 5.579696 | 1.687431 | 3.306622 | 0.000944 | 0.003015 | 0        | 0        | 0.695731 | 6.696381 | 21.39111 | 3.014938 |
| 5978  | LOC119615 | 10.15634 | 5.571141 | 1.335174 | 4.172595 | 3.01E-05 | 0.000134 | 0        | 0        | 1.391463 | 31.24978 | 19.252   | 9.044815 |
| 5963  | LOC119627 | 10.09433 | 5.564133 | 1.330801 | 4.18104  | 2.90E-05 | 0.000129 | 0        | 0        | 1.391463 | 22.32127 | 27.80844 | 9.044815 |
| 5909  | COL3A1    | 9.759601 | 5.559211 | 1.321393 | 4.207085 | 2.59E-05 | 0.000116 | 0        | 0.547412 | 0.695731 | 29.01765 | 19.252   | 9.044815 |
| 6290  | ARSF      | 10.15288 | 5.558794 | 1.378058 | 4.033788 | 5.49E-05 | 0.000232 | 0        | 0        | 1.391463 | 24.5534  | 29.94755 | 5.024897 |
| 3416  | RALYL     | 25.36779 | 5.55765  | 0.9371   | 5.930693 | 3.02E-09 | 2.35E-08 | 0        | 0        | 3.478657 | 40.17829 | 83.42532 | 25.12449 |
| 5894  | LOC103245 | 9.727708 | 5.55698  | 1.317599 | 4.217503 | 2.47E-05 | 0.000111 | 0.542086 | 0        | 0.695731 | 24.5534  | 23.53022 | 9.044815 |
| 5860  | LOC119615 | 9.660562 | 5.552221 | 1.310414 | 4.236996 | 2.27E-05 | 0.000103 | 0        | 0.547412 | 0.695731 | 17.85702 | 27.80844 | 11.05477 |
| 6161  | SLC16A11  | 9.955275 | 5.550633 | 1.356121 | 4.093023 | 4.26E-05 | 0.000184 | 0        | 0        | 1.391463 | 35.71403 | 8.556443 | 14.06971 |
| 8103  | LOC119615 | 5.166659 | 5.550407 | 1.642237 | 3.79785  | 0.000725 | 0.00238  | 0        | 0        | 0.695731 | 17.85702 | 6.417332 | 6.029877 |
| 2530  | LOC103245 | 34.03594 | 5.548566 | 0.783398 | 7.082688 | 1.41E-12 | 1.49E-11 | 0        | 1.642235 | 2.782925 | 66.96381 | 102.6773 | 30.14938 |
| 4366  | KCNH5     | 14.61322 | 5.548473 | 1.087132 | 5.10377  | 3.33E-07 | 2.03E-06 | 0        | 0.547412 | 1.391463 | 29.01765 | 40.6431  | 16.07967 |
| 7887  | APELA     | 5.098626 | 5.544269 | 1.609258 | 3.445233 | 0.000571 | 0.001923 | 0        | 0        | 0.695731 | 11.16063 | 10.69555 | 8.039836 |
| 7888  | INMT      | 5.098626 | 5.544269 | 1.609258 | 3.445233 | 0.000571 | 0.001923 | 0        | 0        | 0.695731 | 11.16063 | 10.69555 | 8.039836 |
| 7979  | GABRR2    | 5.110934 | 5.542162 | 1.621773 | 3.417347 | 0.000632 | 0.002106 | 0        | 0.547412 | 0        | 13.39276 | 10.69555 | 6.029877 |
| 7980  | LOC103225 | 5.110934 | 5.542162 | 1.621773 | 3.417347 | 0.000632 | 0.002106 | 0        | 0.547412 | 0        | 13.39276 | 10.69555 | 6.029877 |
| 8154  | PRDM13    | 5.147962 | 5.541997 | 1.647481 | 3.363921 | 0.000768 | 0.002505 | 0        | 0.547412 | 0        | 15.62489 | 10.69555 | 4.019918 |
| 7917  | LOC103215 | 5.083123 | 5.540991 | 1.613619 | 3.433891 | 0.000595 | 0.001998 | 0        | 0        | 0.695731 | 8.928508 | 12.83466 | 8.039836 |
| 7977  | LOC119615 | 5.120151 | 5.538619 | 1.620499 | 3.417847 | 0.000631 | 0.002104 | 0        | 0        | 0.695731 | 11.16063 | 12.83466 | 6.029877 |
| 5999  | LOC103237 | 9.76322  | 5.535951 | 1.329286 | 4.164605 | 3.12E-05 | 0.000138 | 0        | 0        | 1.391463 | 11.16063 | 29.94755 | 16.07967 |
| 8497  | LOC119625 | 5.138482 | 5.534729 | 1.699287 | 3.257089 | 0.001126 | 0.003522 | 0        | 0.547412 | 0        | 11.16063 | 17.11289 | 2.009959 |
| 11983 | LOC119625 | 2.56712  | 5.533955 | 2.297034 | 2.409174 | 0.015989 | 0.035471 | 0        | 0        | 0        | 13.39276 | 0        | 2.009959 |
| 11984 | KIF2B     | 2.56712  | 5.533955 | 2.297034 | 2.409174 | 0.015989 | 0.035471 | 0        | 0        | 0        | 13.39276 | 0        | 2.009959 |
| 8218  | LOC103245 | 5.126174 | 5.531964 | 1.655569 | 3.341429 | 0.000833 | 0.002696 | 0        | 0        | 0.695731 | 8.928508 | 17.11289 | 4.019918 |
| 6011  | CUNH10or  | 9.576602 | 5.52905  | 1.329421 | 4.158992 | 3.20E-05 | 0.000141 | 0        | 0.547412 | 0.695731 | 26.78552 | 21.39111 | 8.039836 |
| 8629  | MLN       | 5.05814  | 5.528807 | 1.716807 | 3.2204   | 0.00128  | 0.003944 | 0        | 0        | 0.695731 | 2.232127 | 21.39111 | 6.029877 |
| 6221  | GPR45     | 9.880326 | 5.528316 | 1.359642 | 4.066009 | 4.78E-05 | 0.000204 | 0        | 0        | 1.391463 | 15.62489 | 34.22577 | 8.039836 |
| 8512  | PRG3      | 5.095168 | 5.527753 | 1.699148 | 3.25325  | 0.001141 | 0.003563 | 0        | 0        | 0.695731 | 4.464254 | 21.39111 | 4.019918 |
| 8823  | LOC119615 | 5.079666 | 5.526663 | 1.745614 | 3.166028 | 0.001545 | 0.004656 | 0        | 0        | 0.695731 | 2.232127 | 23.53022 | 4.019918 |



|       |           |          |          |          |          |           |          |          |          |          |          |          |          |
|-------|-----------|----------|----------|----------|----------|-----------|----------|----------|----------|----------|----------|----------|----------|
| 12087 | IRGM      | 2.573143 | 5.524021 | 2.311572 | 2.389725 | 0.016861  | 0.037082 | 0        | 0        | 0        | 11.16063 | 4.278221 | 0        |
| 6374  | LOC119622 | 9.849321 | 5.522028 | 1.382878 | 3.993141 | 6.52E-05  | 0.000272 | 0        | 0        | 1.391463 | 11.16063 | 38.50399 | 8.039836 |
| 10974 | LOC119624 | 2.551617 | 5.518736 | 2.094391 | 2.635007 | 0.008414  | 0.020379 | 0        | 0        | 0        | 11.16063 | 2.139111 | 2.009959 |
| 10976 | UMOD      | 2.551617 | 5.518736 | 2.094391 | 2.635007 | 0.008414  | 0.020379 | 0        | 0        | 0        | 11.16063 | 2.139111 | 2.009959 |
| 10719 | LOC119625 | 2.514589 | 5.518428 | 2.05381  | 2.686923 | 0.007211  | 0.017885 | 0        | 0        | 0        | 8.928508 | 2.139111 | 4.019918 |
| 12026 | CLEC12B   | 2.55764  | 5.515603 | 2.296598 | 2.401641 | 0.016322  | 0.036081 | 0        | 0        | 0        | 8.928508 | 6.417332 | 0        |
| 6089  | SFTPC     | 9.768818 | 5.514232 | 1.336169 | 4.126897 | 3.68E-05  | 0.000161 | 0        | 0        | 1.391463 | 26.78552 | 21.39111 | 9.044815 |
| 10587 | LOC119626 | 2.462059 | 5.513605 | 2.022804 | 2.725723 | 0.006416  | 0.016111 | 0        | 0        | 0        | 4.464254 | 4.278221 | 6.029877 |
| 10544 | LOC103223 | 2.499087 | 5.510725 | 2.015278 | 2.734474 | 0.006248  | 0.015749 | 0        | 0        | 0        | 6.696381 | 4.278221 | 4.019918 |
| 10545 | LOC119627 | 2.499087 | 5.510725 | 2.015278 | 2.734474 | 0.006248  | 0.015749 | 0        | 0        | 0        | 6.696381 | 4.278221 | 4.019918 |
| 10546 | LOC119628 | 2.499087 | 5.510725 | 2.015278 | 2.734474 | 0.006248  | 0.015749 | 0        | 0        | 0        | 6.696381 | 4.278221 | 4.019918 |
| 10547 | SEBOX     | 2.499087 | 5.510725 | 2.015278 | 2.734474 | 0.006248  | 0.015749 | 0        | 0        | 0        | 6.696381 | 4.278221 | 4.019918 |
| 10722 | GCM2      | 2.536115 | 5.509443 | 2.051027 | 2.686188 | 0.007227  | 0.017916 | 0        | 0        | 0        | 8.928508 | 4.278221 | 2.009959 |
| 10723 | LOC103245 | 2.536115 | 5.509443 | 2.051027 | 2.686188 | 0.007227  | 0.017916 | 0        | 0        | 0        | 8.928508 | 4.278221 | 2.009959 |
| 10724 | SLC10A1   | 2.536115 | 5.509443 | 2.051027 | 2.686188 | 0.007227  | 0.017916 | 0        | 0        | 0        | 8.928508 | 4.278221 | 2.009959 |
| 12057 | ANKRD66   | 2.542137 | 5.508023 | 2.299591 | 2.395219 | 0.01661   | 0.036622 | 0        | 0        | 0        | 6.696381 | 8.556443 | 0        |
| 12058 | BECN2     | 2.542137 | 5.508023 | 2.299591 | 2.395219 | 0.01661   | 0.036622 | 0        | 0        | 0        | 6.696381 | 8.556443 | 0        |
| 10746 | LOC119629 | 2.446556 | 5.50611  | 2.053988 | 2.680693 | 0.007347  | 0.018176 | 0        | 0        | 0        | 2.232127 | 6.417332 | 6.029877 |
| 2863  | LOC103218 | 23.18401 | 5.504422 | 0.835022 | 6.591951 | 4.34E-11  | 4.03E-10 | 0        | 1.094824 | 2.087194 | 44.64254 | 47.06043 | 44.2191  |
| 10575 | CMA1      | 2.483584 | 5.503769 | 2.017538 | 2.727963 | 0.006373  | 0.016019 | 0        | 0        | 0        | 4.464254 | 6.417332 | 4.019918 |
| 10576 | LOC103228 | 2.483584 | 5.503769 | 2.017538 | 2.727963 | 0.006373  | 0.016019 | 0        | 0        | 0        | 4.464254 | 6.417332 | 4.019918 |
| 10684 | LOC103247 | 2.520612 | 5.501768 | 2.04105  | 2.695558 | 0.007027  | 0.017484 | 0        | 0        | 0        | 6.696381 | 6.417332 | 2.009959 |
| 10685 | LOC119629 | 2.520612 | 5.501768 | 2.04105  | 2.695558 | 0.007027  | 0.017484 | 0        | 0        | 0        | 6.696381 | 6.417332 | 2.009959 |
| 12176 | LOC119629 | 2.526635 | 5.501202 | 2.320478 | 2.370719 | 0.017754  | 0.038753 | 0        | 0        | 0        | 4.464254 | 10.69555 | 0        |
| 12177 | MTNR1B    | 2.526635 | 5.501202 | 2.320478 | 2.370719 | 0.017754  | 0.038753 | 0        | 0        | 0        | 4.464254 | 10.69555 | 0        |
| 12178 | LOC119619 | 2.526635 | 5.501202 | 2.320478 | 2.370719 | 0.017754  | 0.038753 | 0        | 0        | 0        | 4.464254 | 10.69555 | 0        |
| 12179 | LOC119619 | 2.526635 | 5.501202 | 2.320478 | 2.370719 | 0.017754  | 0.038753 | 0        | 0        | 0        | 4.464254 | 10.69555 | 0        |
| 13627 | LOC119629 | 2.495629 | 5.495562 | 2.637762 | 2.083419 | 0.037213  | 0.072599 | 0        | 0        | 0        | 0        | 14.97377 | 0        |
| 12423 | LOC119629 | 2.511132 | 5.495502 | 2.37252  | 2.316315 | 0.020541  | 0.043954 | 0        | 0        | 0        | 2.232127 | 12.83466 | 0        |
| 10776 | KNG1      | 2.505109 | 5.495223 | 2.055481 | 2.673449 | 0.007508  | 0.018511 | 0        | 0        | 0        | 4.464254 | 8.556443 | 2.009959 |
| 10777 | CCR9      | 2.505109 | 5.495223 | 2.055481 | 2.673449 | 0.007508  | 0.018511 | 0        | 0        | 0        | 4.464254 | 8.556443 | 2.009959 |
| 10781 | PYCARD    | 2.505109 | 5.495223 | 2.055481 | 2.673449 | 0.007508  | 0.018511 | 0        | 0        | 0        | 4.464254 | 8.556443 | 2.009959 |
| 10782 | LOC103234 | 2.505109 | 5.495223 | 2.055481 | 2.673449 | 0.007508  | 0.018511 | 0        | 0        | 0        | 4.464254 | 8.556443 | 2.009959 |
| 10783 | LOC119629 | 2.505109 | 5.495223 | 2.055481 | 2.673449 | 0.007508  | 0.018511 | 0        | 0        | 0        | 4.464254 | 8.556443 | 2.009959 |
| 8131  | LOC103216 | 4.921025 | 5.493942 | 1.630034 | 3.370446 | 0.00075   | 0.002454 | 0.542086 | 0        | 0        | 13.39276 | 8.556443 | 7.034856 |
| 8114  | LOC119626 | 4.946632 | 5.493873 | 1.628452 | 3.373679 | 0.000742  | 0.00243  | 0        | 0        | 0.695731 | 13.39276 | 8.556443 | 7.034856 |
| 11079 | LOC119626 | 2.489607 | 5.489887 | 2.103643 | 2.609704 | 0.009062  | 0.021741 | 0        | 0        | 0        | 2.232127 | 10.69555 | 2.009959 |
| 11080 | LOC119626 | 2.489607 | 5.489887 | 2.103643 | 2.609704 | 0.009062  | 0.021741 | 0        | 0        | 0        | 2.232127 | 10.69555 | 2.009959 |
| 11081 | DNAJB8    | 2.489607 | 5.489887 | 2.103643 | 2.609704 | 0.009062  | 0.021741 | 0        | 0        | 0        | 2.232127 | 10.69555 | 2.009959 |
| 8419  | LOC119627 | 5.005185 | 5.489357 | 1.675435 | 3.276378 | 0.001051  | 0.00332  | 0        | 0        | 0.695731 | 15.62489 | 10.69555 | 3.014938 |
| 12181 | LOC119618 | 2.474104 | 5.488565 | 2.315555 | 2.370303 | 0.017774  | 0.038791 | 0        | 0        | 0        | 0        | 12.83466 | 2.009959 |
| 8211  | FOXI3     | 4.952655 | 5.484763 | 1.640693 | 3.342954 | 0.000829  | 0.002684 | 0        | 0        | 0.695731 | 11.16063 | 12.83466 | 5.024897 |
| 8238  | TSPYL6    | 4.874516 | 5.483765 | 1.644101 | 3.335419 | 0.000852  | 0.002749 | 0.542086 | 0        | 0        | 6.696381 | 14.97377 | 7.034856 |
| 8399  | CD1B      | 4.859901 | 5.480938 | 1.669675 | 3.282638 | 0.001028  | 0.003254 | 0        | 0.547412 | 0        | 4.464254 | 17.11289 | 7.034856 |
| 8365  | LOC103238 | 2.921649 | 5.478937 | 1.66343  | 3.293759 | 0.000989  | 0.003141 | 0        | 0        | 0.695731 | 6.696381 | 17.11289 | 5.024897 |
| 3742  | OC90      | 18.09638 | 5.478175 | 0.978063 | 5.601047 | 2.13E-08  | 1.51E-07 | 0        | 1.642235 | 0.695731 | 37.94616 | 49.19955 | 19.09461 |
| 8551  | LOC119627 | 4.906146 | 5.476713 | 1.690061 | 3.240541 | 0.001193  | 0.003709 | 0        | 0        | 0.695731 | 4.464254 | 19.252   | 5.024897 |
| 3080  | LOC103214 | 27.98853 | 5.469197 | 0.86769  | 6.303171 | 2.92E-10  | 2.52E-09 | 0        | 1.094824 | 2.782925 | 93.74933 | 49.19955 | 21.10457 |
| 6450  | MARCO     | 9.148592 | 5.460374 | 1.378736 | 3.96042  | 7.48E-05  | 0.000308 | 0        | 0.547412 | 0.695731 | 13.39276 | 34.22577 | 6.029877 |
| 6663  | LOC119626 | 8.818997 | 5.455089 | 1.408645 | 3.872578 | 0.000108  | 0.00043  | 0.542086 | 0.547412 | 0        | 17.85702 | 29.94755 | 4.019918 |
| 6581  | SGCZ      | 8.713935 | 5.448533 | 1.393976 | 3.908628 | 9.28E-05  | 0.000375 | 0.542086 | 0.547412 | 0        | 8.928508 | 34.22577 | 8.039836 |
| 9863  | LOC119626 | 4.859214 | 5.446441 | 1.884289 | 2.89045  | 0.003847  | 0.010369 | 0        | 0        | 0.695731 | 15.62489 | 12.83466 | 0        |
| 6094  | LOC119627 | 8.994033 | 5.446128 | 1.320198 | 4.125236 | 3.70E-05  | 0.000162 | 0        | 0.547412 | 0.695731 | 24.5534  | 17.11289 | 11.05477 |
| 8339  | LOC103236 | 4.754416 | 5.438044 | 1.647781 | 3.300222 | 0.000966  | 0.00308  | 0        | 0.547412 | 0        | 13.39276 | 8.556443 | 6.029877 |
| 8340  | LOC119627 | 4.754416 | 5.438044 | 1.647781 | 3.300222 | 0.000966  | 0.00308  | 0        | 0.547412 | 0        | 13.39276 | 8.556443 | 6.029877 |
| 169   | DNAJC12   | 284.5749 | 5.437884 | 0.255451 | 21.28738 | 1.49E-100 | 2.34E-98 | 16.80468 | 10.40082 | 11.1317  | 531.2462 | 519.8039 | 618.0624 |
| 12    | CFH       | 3958.017 | 5.436907 | 0.103474 | 52.54385 | 0         | 0        | 164.7943 | 186.6674 | 185.0645 | 7723.159 | 7568.174 | 7920.243 |
| 8316  | LOC119627 | 4.763633 | 5.434033 | 1.642146 | 3.309105 | 0.000936  | 0.002992 | 0        | 0        | 0.695731 | 11.16063 | 10.69555 | 6.029877 |
| 1095  | LOC103247 | 60.27703 | 5.430855 | 0.5155   | 10.53513 | 5.95E-26  | 1.44E-24 | 3.794605 | 2.189647 | 2.087194 | 140.624  | 98.39909 | 114.5677 |
| 5181  | HTR4      | 14.0265  | 5.430751 | 1.183498 | 4.588728 | 4.46E-06  | 2.29E-05 | 0        | 0        | 2.087194 | 31.24978 | 42.78221 | 8.039836 |
| 8359  | KLHL1     | 4.72341  | 5.430637 | 1.648286 | 3.294717 | 0.000985  | 0.003133 | 0        | 0.547412 | 0        | 8.928508 | 12.83466 | 6.029877 |
| 8527  | NKG7      | 4.670879 | 5.430048 | 1.672208 | 3.247233 | 0.001165  | 0.003633 | 0        | 0.547412 | 0        | 4.464254 | 14.97377 | 8.039836 |
| 6555  | XIRP1     | 9.297334 | 5.427508 | 1.385727 | 3.916721 | 8.98E-05  | 0.000364 | 0        | 0        | 1.391463 | 31.24978 | 17.11289 | 6.029877 |
| 6590  | LAIR1     | 8.640343 | 5.427191 | 1.389818 | 3.904964 | 9.42E-05  | 0.00038  | 0        | 1.094824 | 0        | 22.32127 | 21.39111 | 7.034856 |
| 8661  | TACR1     | 4.754153 | 5.42315  | 1.687608 | 3.213513 | 0.001311  | 0.004025 | 0        | 0        | 0.695731 | 6.696381 | 17.11289 | 4.019918 |
| 9120  | LOC103247 | 4.723147 | 5.419528 | 1.7609   | 3.077704 | 0.002086  | 0.006081 | 0        | 0        | 0.695731 | 2.232127 | 21.39111 | 4.019918 |
| 9487  | GATA4     | 4.719953 | 5.419135 | 1.813774 | 2.987767 | 0.00281   | 0.007875 | 0        | 0.547412 | 0        | 2.232127 | 23.53022 | 2.009959 |
| 2671  | LOC103236 | 26.25398 | 5.41332  | 0.787507 | 6.873992 | 6.24E-12  | 6.21E-11 | 0        | 1.642235 | 2.087194 | 53.57105 | 62.03421 | 38.18922 |
| 11659 | EVI2B     | 2.384121 | 5.412999 | 2.18345  | 2.479104 | 0.013171  | 0.030033 | 0        | 0        | 0        | 11.16063 | 2.139111 | 1.004979 |
| 11170 | LOC103234 | 2.310065 | 5.412152 | 2.09224  | 2.586774 | 0.009688  | 0.023058 | 0        | 0        | 0        | 6.696381 | 2.139111 | 5.024897 |
| 11047 | ODF4      | 2.294562 | 5.404842 | 2.065919 | 2.616192 | 0.008892  | 0.021398 | 0        | 0        | 0        | 4.464254 | 4.278221 | 5.024897 |
| 11468 | FGA       | 2.368618 | 5.402795 | 2.141774 | 2.52258  | 0.01165   | 0.026988 | 0        | 0        | 0        | 8.928508 | 4.278221 | 1.004979 |
| 11469 | CTXND2    | 2.368618 | 5.402795 | 2.141774 | 2.52258  | 0.01165   | 0.026988 | 0        | 0        | 0        | 8.928508 | 4.278221 | 1.004979 |
| 11470 | LOC119629 | 2.368618 | 5.402795 | 2.141774 | 2.52258  | 0.01165   | 0.026988 | 0        | 0        | 0        | 8.928508 | 4.278221 | 1.004979 |



|       |           |          |          |          |          |          |          |          |          |          |          |          |          |
|-------|-----------|----------|----------|----------|----------|----------|----------|----------|----------|----------|----------|----------|----------|
| 11472 | LOC103226 | 2.368618 | 5.402795 | 2.141774 | 2.52258  | 0.01165  | 0.026988 | 0        | 0        | 0        | 8.928508 | 4.278221 | 1.004979 |
| 11473 | LOC103247 | 2.368618 | 5.402795 | 2.141774 | 2.52258  | 0.01165  | 0.026988 | 0        | 0        | 0        | 8.928508 | 4.278221 | 1.004979 |
| 11474 | LOC119620 | 2.368618 | 5.402795 | 2.141774 | 2.52258  | 0.01165  | 0.026988 | 0        | 0        | 0        | 8.928508 | 4.278221 | 1.004979 |
| 11476 | LOC119623 | 2.368618 | 5.402795 | 2.141774 | 2.52258  | 0.01165  | 0.026988 | 0        | 0        | 0        | 8.928508 | 4.278221 | 1.004979 |
| 11072 | GPR182    | 2.33159  | 5.401628 | 2.068741 | 2.61107  | 0.009026 | 0.021668 | 0        | 0        | 0        | 6.696381 | 4.278221 | 3.014938 |
| 11073 | MYL1      | 2.33159  | 5.401628 | 2.068741 | 2.61107  | 0.009026 | 0.021668 | 0        | 0        | 0        | 6.696381 | 4.278221 | 3.014938 |
| 11075 | UCMA      | 2.33159  | 5.401628 | 2.068741 | 2.61107  | 0.009026 | 0.021668 | 0        | 0        | 0        | 6.696381 | 4.278221 | 3.014938 |
| 6582  | FAM71F2   | 8.792074 | 5.401196 | 1.381907 | 3.908509 | 9.29E-05 | 0.000375 | 0        | 0.547412 | 0.695731 | 13.39276 | 32.08666 | 6.029877 |
| 11434 | TRIM42    | 2.353115 | 5.394405 | 2.132804 | 2.529255 | 0.011431 | 0.026572 | 0        | 0        | 0        | 6.696381 | 6.417332 | 1.004979 |
| 11435 | MASP2     | 2.353115 | 5.394405 | 2.132804 | 2.529255 | 0.011431 | 0.026572 | 0        | 0        | 0        | 6.696381 | 6.417332 | 1.004979 |
| 11436 | LOC103221 | 2.353115 | 5.394405 | 2.132804 | 2.529255 | 0.011431 | 0.026572 | 0        | 0        | 0        | 6.696381 | 6.417332 | 1.004979 |
| 11102 | LOC119624 | 2.316087 | 5.394106 | 2.071369 | 2.604127 | 0.009211 | 0.022052 | 0        | 0        | 0        | 4.464254 | 6.417332 | 3.014938 |
| 11104 | LOC119626 | 2.316087 | 5.394106 | 2.071369 | 2.604127 | 0.009211 | 0.022052 | 0        | 0        | 0        | 4.464254 | 6.417332 | 3.014938 |
| 11346 | HJV       | 2.300585 | 5.387471 | 2.114987 | 2.547283 | 0.010857 | 0.025427 | 0        | 0        | 0        | 2.232127 | 8.556443 | 3.014938 |
| 11347 | LOC103234 | 2.300585 | 5.387471 | 2.114987 | 2.547283 | 0.010857 | 0.025427 | 0        | 0        | 0        | 2.232127 | 8.556443 | 3.014938 |
| 11348 | LOC119618 | 2.300585 | 5.387471 | 2.114987 | 2.547283 | 0.010857 | 0.025427 | 0        | 0        | 0        | 2.232127 | 8.556443 | 3.014938 |
| 11349 | WFDC13    | 2.300585 | 5.387471 | 2.114987 | 2.547283 | 0.010857 | 0.025427 | 0        | 0        | 0        | 2.232127 | 8.556443 | 3.014938 |
| 11350 | LOC103233 | 2.300585 | 5.387471 | 2.114987 | 2.547283 | 0.010857 | 0.025427 | 0        | 0        | 0        | 2.232127 | 8.556443 | 3.014938 |
| 11351 | LOC103227 | 2.300585 | 5.387471 | 2.114987 | 2.547283 | 0.010857 | 0.025427 | 0        | 0        | 0        | 2.232127 | 8.556443 | 3.014938 |
| 12359 | LOC103225 | 2.263557 | 5.387429 | 2.311861 | 2.330343 | 0.019788 | 0.042565 | 0        | 0        | 0        | 8.556443 | 5.024897 |          |
| 11520 | LOC103245 | 2.337613 | 5.387254 | 2.147074 | 2.509114 | 0.012103 | 0.027924 | 0        | 0        | 0        | 4.464254 | 8.556443 | 1.004979 |
| 11521 | SPATA48   | 2.337613 | 5.387254 | 2.147074 | 2.509114 | 0.012103 | 0.027924 | 0        | 0        | 0        | 4.464254 | 8.556443 | 1.004979 |
| 11522 | GDF3      | 2.337613 | 5.387254 | 2.147074 | 2.509114 | 0.012103 | 0.027924 | 0        | 0        | 0        | 4.464254 | 8.556443 | 1.004979 |
| 11523 | LOC119618 | 2.337613 | 5.387254 | 2.147074 | 2.509114 | 0.012103 | 0.027924 | 0        | 0        | 0        | 4.464254 | 8.556443 | 1.004979 |
| 8565  | LOC103225 | 4.565394 | 5.386455 | 1.663414 | 3.238193 | 0.001203 | 0.003734 | 0        | 0.547412 | 0        | 13.39276 | 6.417332 | 7.034856 |
| 8546  | DGAT2L6   | 4.590114 | 5.386397 | 1.661674 | 3.241548 | 0.001189 | 0.003698 | 0        | 0        | 0.695731 | 13.39276 | 6.417332 | 7.034856 |
| 12467 | SLC27A6   | 2.285082 | 5.38304  | 2.333818 | 2.306538 | 0.021081 | 0.044946 | 0        | 0        | 0        | 10.69555 | 3.014938 |          |
| 12468 | LOC119620 | 2.285082 | 5.38304  | 2.333818 | 2.306538 | 0.021081 | 0.044946 | 0        | 0        | 0        | 10.69555 | 3.014938 |          |
| 12469 | LOC103222 | 2.285082 | 5.38304  | 2.333818 | 2.306538 | 0.021081 | 0.044946 | 0        | 0        | 0        | 10.69555 | 3.014938 |          |
| 11782 | LOC119620 | 2.32211  | 5.38154  | 2.194344 | 2.45246  | 0.014188 | 0.031996 | 0        | 0        | 0        | 2.232127 | 10.69555 | 1.004979 |
| 11784 | FAM170B   | 2.32211  | 5.38154  | 2.194344 | 2.45246  | 0.014188 | 0.031996 | 0        | 0        | 0        | 2.232127 | 10.69555 | 1.004979 |
| 11785 | LOC119628 | 2.32211  | 5.38154  | 2.194344 | 2.45246  | 0.014188 | 0.031996 | 0        | 0        | 0        | 2.232127 | 10.69555 | 1.004979 |
| 11786 | LOC119618 | 2.32211  | 5.38154  | 2.194344 | 2.45246  | 0.014188 | 0.031996 | 0        | 0        | 0        | 2.232127 | 10.69555 | 1.004979 |
| 11787 | ZP4       | 2.32211  | 5.38154  | 2.194344 | 2.45246  | 0.014188 | 0.031996 | 0        | 0        | 0        | 2.232127 | 10.69555 | 1.004979 |
| 11788 | LOC119620 | 2.32211  | 5.38154  | 2.194344 | 2.45246  | 0.014188 | 0.031996 | 0        | 0        | 0        | 2.232127 | 10.69555 | 1.004979 |
| 11789 | LOC119623 | 2.32211  | 5.38154  | 2.194344 | 2.45246  | 0.014188 | 0.031996 | 0        | 0        | 0        | 2.232127 | 10.69555 | 1.004979 |
| 12859 | LOC119625 | 2.306607 | 5.381222 | 2.416624 | 2.226752 | 0.025964 | 0.053674 | 0        | 0        | 0        | 12.83466 | 1.004979 |          |
| 12860 | KRT31     | 2.306607 | 5.381222 | 2.416624 | 2.226752 | 0.025964 | 0.053674 | 0        | 0        | 0        | 12.83466 | 1.004979 |          |
| 8835  | TMEM235   | 4.648667 | 5.380396 | 1.701752 | 3.16168  | 0.001569 | 0.00472  | 0        | 0        | 0.695731 | 15.62489 | 8.556443 | 3.014938 |
| 8586  | OVCH2     | 4.543605 | 5.374925 | 1.662518 | 3.233002 | 0.001225 | 0.003792 | 0        | 0        | 0.695731 | 6.696381 | 12.83466 | 7.034856 |
| 8587  | GPAT2     | 4.543605 | 5.374925 | 1.662518 | 3.233002 | 0.001225 | 0.003792 | 0        | 0        | 0.695731 | 6.696381 | 12.83466 | 7.034856 |
| 8763  | LOC103227 | 4.528103 | 5.371625 | 1.686618 | 3.184849 | 0.001448 | 0.004394 | 0        | 0        | 0.695731 | 4.464254 | 14.97377 | 7.034856 |
| 8728  | LOC119618 | 4.565131 | 5.36908  | 1.681125 | 3.193742 | 0.001404 | 0.004278 | 0        | 0        | 0.695731 | 6.696381 | 14.97377 | 5.024897 |
| 8873  | LOC119620 | 4.577439 | 5.368586 | 1.70448  | 3.149692 | 0.001634 | 0.004897 | 0        | 0.547412 | 0        | 8.928508 | 14.97377 | 3.014938 |
| 8977  | SNX20     | 4.586656 | 5.365586 | 1.717904 | 3.123332 | 0.001788 | 0.005296 | 0        | 0        | 0.695731 | 6.696381 | 17.11289 | 3.014938 |
| 8978  | EDDM3A    | 4.586656 | 5.365586 | 1.717904 | 3.123332 | 0.001788 | 0.005296 | 0        | 0        | 0.695731 | 6.696381 | 17.11289 | 3.014938 |
| 2784  | MS4A8     | 24.39368 | 5.359251 | 0.797014 | 6.724161 | 1.77E-11 | 1.69E-10 | 2.168345 | 1.094824 | 0        | 53.57105 | 51.33866 | 38.18922 |
| 7     | PLA1A     | 1629.574 | 5.354161 | 0.13208  | 40.5374  | 0        | 0        | 82.39713 | 73.90059 | 77.22618 | 3011.139 | 3069.624 | 3463.159 |
| 6871  | LOC119625 | 8.471696 | 5.342722 | 1.410365 | 3.788185 | 0.000152 | 0.000587 | 0.542086 | 0        | 0.695731 | 15.62489 | 29.94755 | 4.019918 |
| 5185  | GALNT14   | 13.16493 | 5.34199  | 1.164432 | 4.587635 | 4.48E-06 | 2.30E-05 | 0        | 0        | 2.087194 | 40.17829 | 25.66933 | 11.05477 |
| 10362 | LOC103224 | 4.493478 | 5.337413 | 1.924182 | 2.773861 | 0.00554  | 0.014212 | 0        | 0.547412 | 0        | 17.85702 | 8.556443 | 0        |
| 4672  | CSF2      | 12.08382 | 5.337368 | 1.088551 | 4.903186 | 9.43E-07 | 5.37E-06 | 0.542086 | 0.547412 | 0.695731 | 22.32127 | 19.252   | 29.1444  |
| 4852  | LOC103247 | 12.70016 | 5.334563 | 1.116047 | 4.779871 | 1.75E-06 | 9.61E-06 | 0        | 0.547412 | 1.391463 | 31.24978 | 29.94755 | 13.06473 |
| 4308  | KCNJ2     | 17.43252 | 5.332478 | 1.035253 | 5.150892 | 2.59E-07 | 1.60E-06 | 0        | 0        | 2.782925 | 31.24978 | 53.47777 | 17.08465 |
| 9213  | PCDH20    | 4.45645  | 5.322273 | 1.743754 | 3.052192 | 0.002272 | 0.006555 | 0        | 0.547412 | 0        | 15.62489 | 8.556443 | 2.009959 |
| 9182  | CLNK      | 4.440948 | 5.317474 | 1.737472 | 3.060466 | 0.00221  | 0.006398 | 0        | 0.547412 | 0        | 13.39276 | 10.69555 | 2.009959 |
| 6536  | NCR3      | 8.41466  | 5.3158   | 1.354313 | 3.92509  | 8.67E-05 | 0.000353 | 0        | 0        | 1.391463 | 22.32127 | 10.69555 | 16.07967 |
| 8883  | LOC119623 | 4.42864  | 5.315474 | 1.688374 | 3.148281 | 0.001642 | 0.004915 | 0        | 0        | 0.695731 | 11.16063 | 10.69555 | 4.019918 |
| 8846  | GIPC2     | 4.351389 | 5.31407  | 1.683032 | 3.157439 | 0.001592 | 0.004783 | 0        | 0.547412 | 0        | 6.696381 | 12.83466 | 6.029877 |
| 6504  | APOBEC1   | 8.240511 | 5.313407 | 1.348864 | 3.939173 | 8.18E-05 | 0.000334 | 0        | 0.547412 | 0.695731 | 15.62489 | 23.53022 | 9.044815 |
| 6564  | LOC119623 | 8.473213 | 5.311904 | 1.3569   | 3.914734 | 9.05E-05 | 0.000367 | 0        | 0        | 1.391463 | 24.5534  | 12.83466 | 12.05975 |
| 9235  | AGXT      | 4.434662 | 5.309488 | 1.743062 | 3.04607  | 0.002319 | 0.006674 | 0        | 0        | 0.695731 | 8.928508 | 14.97377 | 2.009959 |
| 5104  | ZNF37A    | 11.91092 | 5.309421 | 1.147657 | 4.626315 | 3.72E-06 | 1.94E-05 | 1.084173 | 0.547412 | 0        | 24.5534  | 34.22577 | 11.05477 |
| 9184  | CFAP97D1  | 4.356524 | 5.305989 | 1.733981 | 3.060005 | 0.002213 | 0.006407 | 0.542086 | 0        | 0        | 4.464254 | 17.11289 | 4.019918 |
| 3124  | VWA5B1    | 24.97744 | 5.305142 | 0.849081 | 6.248099 | 4.15E-10 | 3.54E-09 | 0.542086 | 0.547412 | 2.782925 | 46.87467 | 77.00798 | 22.10955 |
| 6521  | LOC103245 | 8.411202 | 5.304406 | 1.349262 | 3.931339 | 8.45E-05 | 0.000344 | 0        | 0        | 1.391463 | 15.62489 | 21.39111 | 12.05975 |
| 9544  | WNT16     | 4.403657 | 5.304058 | 1.783584 | 2.97382  | 0.002941 | 0.008192 | 0        | 0        | 0.695731 | 4.464254 | 19.252   | 2.009959 |
| 5483  | PAX3      | 12.16949 | 5.297871 | 1.199353 | 4.417273 | 1.00E-05 | 4.85E-05 | 0        | 1.094824 | 0.695731 | 24.5534  | 40.6431  | 6.029877 |
| 11746 | SGCG      | 2.10554  | 5.297594 | 2.154197 | 2.459196 | 0.013925 | 0.031516 | 0        | 0        | 0        | 4.464254 | 2.139111 | 6.029877 |
| 13038 | LOC119618 | 2.201122 | 5.2973   | 2.410629 | 2.197477 | 0.027986 | 0.057052 | 0        | 0        | 0        | 8.928508 | 4.278221 | 0        |
| 13039 | LOC103215 | 2.201122 | 5.2973   | 2.410629 | 2.197477 | 0.027986 | 0.057052 | 0        | 0        | 0        | 8.928508 | 4.278221 | 0        |
| 13041 | LOC103227 | 2.201122 | 5.2973   | 2.410629 | 2.197477 | 0.027986 | 0.057052 | 0        | 0        | 0        | 8.928508 | 4.278221 | 0        |
| 7173  | LOC119628 | 7.902323 | 5.297034 | 1.441884 | 3.67369  | 0.000239 | 0.000886 | 0        | 1.094824 | 0        | 15.62489 | 25.66933 | 5.024897 |
| 12033 | LOC119625 | 2.068512 | 5.296819 | 2.206445 | 2.400612 | 0.016368 | 0.036162 | 0        | 0        | 0        | 2.232127 | 2.139111 | 8.039836 |



|       |           |          |          |          |          |          |          |          |          |          |          |          |          |
|-------|-----------|----------|----------|----------|----------|----------|----------|----------|----------|----------|----------|----------|----------|
| 11707 | GDF10     | 2.142568 | 5.295262 | 2.143518 | 2.47036  | 0.013498 | 0.030651 | 0        | 0        | 0        | 6.696381 | 2.139111 | 4.019918 |
| 11862 | LOC119621 | 2.179596 | 5.293834 | 2.175018 | 2.433926 | 0.014936 | 0.033472 | 0        | 0        | 0        | 8.928508 | 2.139111 | 2.009959 |
| 11863 | ELANE     | 2.179596 | 5.293834 | 2.175018 | 2.433926 | 0.014936 | 0.033472 | 0        | 0        | 0        | 8.928508 | 2.139111 | 2.009959 |
| 6862  | DEFB128   | 8.491281 | 5.293668 | 1.395855 | 3.792421 | 0.000149 | 0.000578 | 0        | 0        | 1.391463 | 17.85702 | 25.66933 | 6.029877 |
| 6770  | LOC119624 | 8.364694 | 5.293045 | 1.382952 | 3.827353 | 0.00013  | 0.000509 | 0        | 0        | 1.391463 | 8.928508 | 27.80844 | 12.05975 |
| 13018 | MYF6      | 2.185619 | 5.288013 | 2.403049 | 2.200543 | 0.027768 | 0.056695 | 0        | 0        | 0        | 6.696381 | 6.417332 | 0        |
| 13019 | LOC119624 | 2.185619 | 5.288013 | 2.403049 | 2.200543 | 0.027768 | 0.056695 | 0        | 0        | 0        | 6.696381 | 6.417332 | 0        |
| 13020 | CLEC4C    | 2.185619 | 5.288013 | 2.403049 | 2.200543 | 0.027768 | 0.056695 | 0        | 0        | 0        | 6.696381 | 6.417332 | 0        |
| 13021 | LOC119621 | 2.185619 | 5.288013 | 2.403049 | 2.200543 | 0.027768 | 0.056695 | 0        | 0        | 0        | 6.696381 | 6.417332 | 0        |
| 5083  | LOC119621 | 12.31777 | 5.287043 | 1.138836 | 4.642496 | 3.44E-06 | 1.80E-05 | 0.542086 | 0        | 1.391463 | 24.5534  | 36.36488 | 11.05477 |
| 11588 | CD3G      | 2.127066 | 5.287009 | 2.117351 | 2.496993 | 0.012525 | 0.028735 | 0        | 0        | 0        | 4.464254 | 4.278221 | 4.019918 |
| 5007  | ODAD2     | 12.28163 | 5.286162 | 1.128345 | 4.684881 | 2.80E-06 | 1.49E-05 | 0        | 0.547412 | 1.391463 | 22.32127 | 36.36488 | 13.06473 |
| 3606  | TMEM108   | 20.4442  | 5.284338 | 0.92169  | 5.733315 | 9.85E-09 | 7.26E-08 | 0        | 1.094824 | 2.087194 | 44.64254 | 57.75599 | 17.08465 |
| 11695 | PKD2L2    | 2.164094 | 5.283987 | 2.137713 | 2.471794 | 0.013444 | 0.030544 | 0        | 0        | 0        | 6.696381 | 4.278221 | 2.009959 |
| 11696 | CD2       | 2.164094 | 5.283987 | 2.137713 | 2.471794 | 0.013444 | 0.030544 | 0        | 0        | 0        | 6.696381 | 4.278221 | 2.009959 |
| 11697 | LOC119621 | 2.164094 | 5.283987 | 2.137713 | 2.471794 | 0.013444 | 0.030544 | 0        | 0        | 0        | 6.696381 | 4.278221 | 2.009959 |
| 11699 | MAGEB4    | 2.164094 | 5.283987 | 2.137713 | 2.471794 | 0.013444 | 0.030544 | 0        | 0        | 0        | 6.696381 | 4.278221 | 2.009959 |
| 11701 | LOC103231 | 2.164094 | 5.283987 | 2.137713 | 2.471794 | 0.013444 | 0.030544 | 0        | 0        | 0        | 6.696381 | 4.278221 | 2.009959 |
| 11702 | LOC119621 | 2.164094 | 5.283987 | 2.137713 | 2.471794 | 0.013444 | 0.030544 | 0        | 0        | 0        | 6.696381 | 4.278221 | 2.009959 |
| 3604  | DEFB1     | 19.01276 | 5.28097  | 0.920875 | 5.73473  | 9.77E-09 | 7.20E-08 | 2.710432 | 0        | 0        | 37.94616 | 34.22577 | 39.1942  |
| 13123 | FHL5      | 2.170116 | 5.279694 | 2.418649 | 2.18291  | 0.029042 | 0.058799 | 0        | 0        | 0        | 4.464254 | 8.556443 | 0        |
| 13124 | LOC119621 | 2.170116 | 5.279694 | 2.418649 | 2.18291  | 0.029042 | 0.058799 | 0        | 0        | 0        | 4.464254 | 8.556443 | 0        |
| 13126 | LOC103231 | 2.170116 | 5.279694 | 2.418649 | 2.18291  | 0.029042 | 0.058799 | 0        | 0        | 0        | 4.464254 | 8.556443 | 0        |
| 13127 | EXOC1L    | 2.170116 | 5.279694 | 2.418649 | 2.18291  | 0.029042 | 0.058799 | 0        | 0        | 0        | 4.464254 | 8.556443 | 0        |
| 13128 | PDE6H     | 2.170116 | 5.279694 | 2.418649 | 2.18291  | 0.029042 | 0.058799 | 0        | 0        | 0        | 4.464254 | 8.556443 | 0        |
| 13129 | LOC103221 | 2.170116 | 5.279694 | 2.418649 | 2.18291  | 0.029042 | 0.058799 | 0        | 0        | 0        | 4.464254 | 8.556443 | 0        |
| 13130 | LOC119621 | 2.170116 | 5.279694 | 2.418649 | 2.18291  | 0.029042 | 0.058799 | 0        | 0        | 0        | 4.464254 | 8.556443 | 0        |
| 13131 | LOC119621 | 2.170116 | 5.279694 | 2.418649 | 2.18291  | 0.029042 | 0.058799 | 0        | 0        | 0        | 4.464254 | 8.556443 | 0        |
| 11761 | LOC119621 | 2.111563 | 5.27895  | 2.149992 | 2.455335 | 0.014075 | 0.031803 | 0        | 0        | 0        | 2.232127 | 6.417332 | 4.019918 |
| 11764 | ENTHD1    | 2.111563 | 5.27895  | 2.149992 | 2.455335 | 0.014075 | 0.031803 | 0        | 0        | 0        | 2.232127 | 6.417332 | 4.019918 |
| 11765 | MAGEL2    | 2.111563 | 5.27895  | 2.149992 | 2.455335 | 0.014075 | 0.031803 | 0        | 0        | 0        | 2.232127 | 6.417332 | 4.019918 |
| 11766 | LOC119621 | 2.111563 | 5.27895  | 2.149992 | 2.455335 | 0.014075 | 0.031803 | 0        | 0        | 0        | 2.232127 | 6.417332 | 4.019918 |
| 11723 | MS4A1     | 2.148591 | 5.27578  | 2.14079  | 2.464408 | 0.013724 | 0.031112 | 0        | 0        | 0        | 4.464254 | 6.417332 | 2.009959 |
| 11724 | LOC103221 | 2.148591 | 5.27578  | 2.14079  | 2.464408 | 0.013724 | 0.031112 | 0        | 0        | 0        | 4.464254 | 6.417332 | 2.009959 |
| 11725 | LOC103241 | 2.148591 | 5.27578  | 2.14079  | 2.464408 | 0.013724 | 0.031112 | 0        | 0        | 0        | 4.464254 | 6.417332 | 2.009959 |
| 11726 | WFDC10B   | 2.148591 | 5.27578  | 2.14079  | 2.464408 | 0.013724 | 0.031112 | 0        | 0        | 0        | 4.464254 | 6.417332 | 2.009959 |
| 11727 | LOC103231 | 2.148591 | 5.27578  | 2.14079  | 2.464408 | 0.013724 | 0.031112 | 0        | 0        | 0        | 4.464254 | 6.417332 | 2.009959 |
| 12872 | LHX8      | 2.074535 | 5.275593 | 2.371884 | 2.224221 | 0.026134 | 0.053975 | 0        | 0        | 0        | 0        | 6.417332 | 6.029877 |
| 13352 | LOC119621 | 2.154613 | 5.272637 | 2.468506 | 2.135963 | 0.032682 | 0.065074 | 0        | 0        | 0        | 2.232127 | 10.69555 | 0        |
| 12897 | LOC119621 | 2.09606  | 5.27042  | 2.374947 | 2.219174 | 0.026475 | 0.054561 | 0        | 0        | 0        | 0        | 8.556443 | 4.019918 |
| 8981  | LOC119621 | 4.156344 | 5.2692   | 1.687585 | 3.122332 | 0.001794 | 0.005311 | 0        | 0.547412 | 0        | 8.928508 | 6.417332 | 9.044815 |
| 11960 | LOC119621 | 2.133088 | 5.268909 | 2.184471 | 2.411984 | 0.015866 | 0.035244 | 0        | 0        | 0        | 2.232127 | 8.556443 | 2.009959 |
| 11962 | TRHR      | 2.133088 | 5.268909 | 2.184471 | 2.411984 | 0.015866 | 0.035244 | 0        | 0        | 0        | 2.232127 | 8.556443 | 2.009959 |
| 11963 | IMPG1     | 2.133088 | 5.268909 | 2.184471 | 2.411984 | 0.015866 | 0.035244 | 0        | 0        | 0        | 2.232127 | 8.556443 | 2.009959 |
| 11964 | P2RY13    | 2.133088 | 5.268909 | 2.184471 | 2.411984 | 0.015866 | 0.035244 | 0        | 0        | 0        | 2.232127 | 8.556443 | 2.009959 |
| 11965 | LOC103241 | 2.133088 | 5.268909 | 2.184471 | 2.411984 | 0.015866 | 0.035244 | 0        | 0        | 0        | 2.232127 | 8.556443 | 2.009959 |
| 11966 | CUNH6orf  | 2.133088 | 5.268909 | 2.184471 | 2.411984 | 0.015866 | 0.035244 | 0        | 0        | 0        | 2.232127 | 8.556443 | 2.009959 |
| 11967 | TBPL2     | 2.133088 | 5.268909 | 2.184471 | 2.411984 | 0.015866 | 0.035244 | 0        | 0        | 0        | 2.232127 | 8.556443 | 2.009959 |
| 11968 | LOC103211 | 2.133088 | 5.268909 | 2.184471 | 2.411984 | 0.015866 | 0.035244 | 0        | 0        | 0        | 2.232127 | 8.556443 | 2.009959 |
| 9201  | TMEM233   | 4.270623 | 5.268573 | 1.724931 | 3.054368 | 0.002255 | 0.006516 | 0        | 0        | 0.695731 | 15.62489 | 4.278221 | 5.024897 |
| 9202  | LOC119621 | 4.270623 | 5.268573 | 1.724931 | 3.054368 | 0.002255 | 0.006516 | 0        | 0        | 0.695731 | 15.62489 | 4.278221 | 5.024897 |
| 8983  | BTNL10    | 4.218092 | 5.265753 | 1.686824 | 3.121696 | 0.001798 | 0.005322 | 0        | 0        | 0.695731 | 11.16063 | 6.417332 | 7.034856 |
| 8979  | LOC119621 | 4.165562 | 5.265156 | 1.686011 | 3.122848 | 0.001791 | 0.005303 | 0        | 0        | 0.695731 | 6.696381 | 8.556443 | 9.044815 |
| 8953  | NLRP9     | 4.20259  | 5.261519 | 1.680855 | 3.130263 | 0.001747 | 0.005186 | 0        | 0        | 0.695731 | 8.928508 | 8.556443 | 7.034856 |
| 9085  | LOC119621 | 4.150059 | 5.260753 | 1.703589 | 3.088041 | 0.002015 | 0.005896 | 0        | 0        | 0.695731 | 4.464254 | 10.69555 | 9.044815 |
| 9014  | AGTR1     | 4.162367 | 5.257558 | 1.689695 | 3.111544 | 0.001861 | 0.005489 | 0        | 0.547412 | 0        | 6.696381 | 10.69555 | 7.034856 |
| 5339  | LOC103221 | 11.83795 | 5.256748 | 1.169204 | 4.496008 | 6.92E-06 | 3.45E-05 | 0        | 1.094824 | 0.695731 | 31.24978 | 29.94755 | 8.039836 |
| 9216  | NLRP13    | 4.236423 | 5.253175 | 1.721985 | 3.050651 | 0.002283 | 0.006587 | 0        | 0.547412 | 0        | 11.16063 | 10.69555 | 3.014938 |
| 9204  | LOC119621 | 4.261143 | 5.253015 | 1.720018 | 3.054046 | 0.002258 | 0.006521 | 0        | 0        | 0.695731 | 11.16063 | 10.69555 | 3.014938 |
| 3431  | OLFM3     | 19.32175 | 5.251934 | 0.887731 | 5.916135 | 3.30E-09 | 2.55E-08 | 0.542086 | 1.642235 | 0.695731 | 53.57105 | 36.36488 | 23.11453 |
| 9477  | LOC103231 | 4.156082 | 5.249923 | 1.755064 | 2.991299 | 0.002778 | 0.007793 | 0        | 0        | 0.695731 | 2.232127 | 14.97377 | 7.034856 |
| 9772  | NPTX2     | 4.267166 | 5.249811 | 1.80378  | 2.91045  | 0.003609 | 0.009819 | 0        | 0        | 0.695731 | 8.928508 | 14.97377 | 1.004979 |
| 5272  | SLC34A3   | 12.06029 | 5.249353 | 1.15716  | 4.536409 | 5.72E-06 | 2.89E-05 | 0.542086 | 0        | 1.391463 | 35.71403 | 25.66933 | 9.044815 |
| 9269  | LOC119621 | 4.220033 | 5.249214 | 1.726536 | 3.040315 | 0.002363 | 0.006778 | 0.542086 | 0        | 0        | 8.928508 | 12.83466 | 3.014938 |
| 9268  | LOC103211 | 4.22092  | 5.249208 | 1.726465 | 3.040438 | 0.002362 | 0.006776 | 0        | 0.547412 | 0        | 8.928508 | 12.83466 | 3.014938 |
| 9243  | LOC119611 | 4.24564  | 5.249054 | 1.724485 | 3.043839 | 0.002336 | 0.006718 | 0        | 0        | 0.695731 | 8.928508 | 12.83466 | 3.014938 |
| 6916  | NLRP7     | 7.958048 | 5.247539 | 1.39237  | 3.768782 | 0.000164 | 0.000631 | 0        | 0.547412 | 0.695731 | 20.08914 | 21.39111 | 5.024897 |
| 7234  | LOC103224 | 7.964071 | 5.244813 | 1.434342 | 3.656598 | 0.000256 | 0.000939 | 0        | 0.547412 | 0.695731 | 17.85702 | 25.66933 | 3.014938 |
| 6848  | SPN       | 7.890015 | 5.243196 | 1.380122 | 3.799081 | 0.000145 | 0.000564 | 0        | 0.547412 | 0.695731 | 13.39276 | 25.66933 | 7.034856 |
| 7025  | LOC119621 | 7.91154  | 5.241184 | 1.406995 | 3.72509  | 0.000195 | 0.000739 | 0        | 0.547412 | 0.695731 | 13.39276 | 27.80844 | 5.024897 |
| 5993  | ART5      | 11.698   | 5.236983 | 1.256789 | 4.166954 | 3.09E-05 | 0.000137 | 0        | 1.094824 | 0.695731 | 29.01765 | 36.36488 | 3.014938 |
| 340   | CCL7      | 189.8797 | 5.23594  | 0.316012 | 16.56879 | 1.17E-61 | 9.16E-60 | 5.420864 | 13.6853  | 10.43597 | 308.0335 | 444.935  | 356.7677 |
| 3778  | COL19A1   | 20.0969  | 5.232436 | 0.939991 | 5.566477 | 2.60E-08 | 1.83E-07 | 0        | 0.547412 | 2.782925 | 42.41041 | 57.75599 | 17.08465 |
| 4137  | LOC103211 | 15.60049 | 5.231613 | 0.993424 | 5.266243 | 1.39E-07 | 8.95E-07 | 0        | 1.094824 | 1.391463 | 31.24978 | 42.78221 | 17.08465 |



|       |           |          |          |          |          |           |           |          |          |          |          |          |          |
|-------|-----------|----------|----------|----------|----------|-----------|-----------|----------|----------|----------|----------|----------|----------|
| 7015  | WIPF3     | 8.134762 | 5.228946 | 1.402614 | 3.728    | 0.000193  | 0.000731  | 0        | 0        | 1.391463 | 17.85702 | 23.53022 | 6.029877 |
| 4993  | LOC119623 | 11.6405  | 5.226383 | 1.113985 | 4.691611 | 2.71E-06  | 1.44E-05  | 0        | 0.547412 | 1.391463 | 17.85702 | 29.94755 | 20.09959 |
| 5013  | KCNA1     | 11.71456 | 5.224444 | 1.116125 | 4.680878 | 2.86E-06  | 1.51E-05  | 0        | 0.547412 | 1.391463 | 22.32127 | 29.94755 | 16.07967 |
| 7298  | WFDC8     | 8.156287 | 5.224049 | 1.43687  | 3.635714 | 0.000277  | 0.00101   | 0        | 0        | 1.391463 | 17.85702 | 25.66933 | 4.019918 |
| 4699  | KLHL34    | 16.30053 | 5.22103  | 1.068945 | 4.884283 | 1.04E-06  | 5.87E-06  | 0        | 0        | 2.782925 | 40.17829 | 42.78221 | 12.05975 |
| 3822  | BLK       | 19.9449  | 5.219431 | 0.945219 | 5.521925 | 3.35E-08  | 2.33E-07  | 0        | 0.547412 | 2.782925 | 44.64254 | 55.61688 | 16.07967 |
| 6781  | LOC103234 | 7.731111 | 5.21719  | 1.364011 | 3.824887 | 0.000131  | 0.000513  | 0.542086 | 0        | 0.695731 | 17.85702 | 19.252   | 8.039836 |
| 1124  | MROH2A    | 71.70198 | 5.21381  | 0.500199 | 10.42347 | 1.94E-25  | 4.58E-24  | 4.336691 | 1.094824 | 6.261582 | 91.51721 | 156.1551 | 170.8465 |
| 6954  | LOC119624 | 7.927673 | 5.213744 | 1.388777 | 3.754198 | 0.000174  | 0.000665  | 0        | 0        | 1.391463 | 24.5534  | 8.556443 | 13.06473 |
| 6807  | LOC119625 | 7.716496 | 5.213022 | 1.366666 | 3.814409 | 0.000137  | 0.000533  | 0        | 0.547412 | 0.695731 | 15.62489 | 21.39111 | 8.039836 |
| 5472  | LOC119626 | 12.06437 | 5.21102  | 1.176971 | 4.427482 | 9.53E-06  | 4.63E-05  | 0        | 0        | 2.087194 | 35.71403 | 23.53022 | 11.05477 |
| 4578  | PDE6A     | 15.48206 | 5.210751 | 1.051888 | 4.953711 | 7.28E-07  | 4.23E-06  | 0        | 1.094824 | 1.391463 | 29.01765 | 51.33866 | 10.04979 |
| 9552  | LOC103228 | 4.103127 | 5.203488 | 1.750947 | 2.971813 | 0.00296   | 0.00824   | 0        | 0        | 0.695731 | 15.62489 | 4.278221 | 4.019918 |
| 10794 | CHRNBA    | 4.105955 | 5.203358 | 1.947663 | 2.671591 | 0.007549  | 0.018592  | 0        | 0.547412 | 0        | 13.39276 | 10.69555 | 0        |
| 6888  | CLEC14A   | 7.924215 | 5.202684 | 1.376131 | 3.78066  | 0.000156  | 0.000604  | 0        | 0        | 1.391463 | 17.85702 | 19.252   | 9.044815 |
| 3992  | KANK4     | 19.09323 | 5.202416 | 0.966973 | 5.380108 | 7.44E-08  | 4.96E-07  | 1.084173 | 0.547412 | 1.391463 | 46.87467 | 55.61688 | 9.044815 |
| 5772  | UTS2R     | 11.76321 | 5.201722 | 1.213296 | 4.287267 | 1.81E-05  | 8.33E-05  | 0        | 0.547412 | 1.391463 | 37.94616 | 25.66933 | 5.024897 |
| 4439  | LOC119627 | 15.66826 | 5.20144  | 1.029825 | 5.050801 | 4.40E-07  | 2.63E-06  | 0        | 0.547412 | 2.087194 | 31.24978 | 47.06043 | 13.06473 |
| 9197  | MINDY4B   | 3.998065 | 5.199188 | 1.70175  | 3.055201 | 0.002249  | 0.006501  | 0        | 0        | 0.695731 | 6.696381 | 8.556443 | 8.039836 |
| 10796 | NELL2     | 4.115172 | 5.198346 | 1.94589  | 2.67145  | 0.007552  | 0.018596  | 0        | 0        | 0.695731 | 11.16063 | 12.83466 | 0        |
| 540   | CXCL8     | 110.6205 | 5.196219 | 0.366186 | 14.19009 | 1.06E-45  | 5.19E-44  | 6.505036 | 5.474118 | 5.565851 | 247.7661 | 190.3808 | 208.0308 |
| 9340  | LOC103235 | 3.982562 | 5.194778 | 1.719539 | 3.021029 | 0.002519  | 0.00717   | 0        | 0        | 0.695731 | 4.464254 | 10.69555 | 8.039836 |
| 10857 | LOC103229 | 4.099669 | 5.193924 | 1.953301 | 2.65905  | 0.007836  | 0.019188  | 0        | 0        | 0.695731 | 8.928508 | 14.97377 | 0        |
| 9335  | SHCBP1L   | 4.072121 | 5.192449 | 1.718003 | 3.022375 | 0.002508  | 0.007142  | 0        | 0        | 0.695731 | 11.16063 | 8.556443 | 4.019918 |
| 808   | LOC103240 | 76.5844  | 5.192397 | 0.431494 | 12.03354 | 2.37E-33  | 7.79E-32  | 4.336691 | 4.379295 | 3.478657 | 136.1597 | 143.3204 | 167.8316 |
| 10984 | LOC119628 | 4.059446 | 5.190101 | 1.971107 | 2.633089 | 0.008461  | 0.020477  | 0        | 0.547412 | 0        | 6.696381 | 17.11289 | 0        |
| 9665  | LOC103236 | 4.068926 | 5.188826 | 1.764    | 2.941511 | 0.003266  | 0.008984  | 0        | 0.547412 | 0        | 11.16063 | 10.69555 | 2.009959 |
| 9432  | GPR148    | 4.004088 | 5.187349 | 1.729071 | 3.000078 | 0.002699  | 0.007606  | 0        | 0        | 0.695731 | 4.464254 | 12.83466 | 6.029877 |
| 9433  | BICDL2    | 4.004088 | 5.187349 | 1.729071 | 3.000078 | 0.002699  | 0.007606  | 0        | 0        | 0.695731 | 4.464254 | 12.83466 | 6.029877 |
| 13685 | LOC103238 | 2.027602 | 5.187239 | 2.503394 | 2.072082 | 0.038258  | 0.074321  | 0        | 0        | 0        | 11.16063 | 0        | 1.004979 |
| 11113 | CD5L      | 4.068664 | 5.186505 | 1.994662 | 2.600193 | 0.009317  | 0.022286  | 0        | 0        | 0.695731 | 4.464254 | 19.252   | 0        |
| 9685  | MUC7      | 4.078144 | 5.184438 | 1.766341 | 2.935129 | 0.003334  | 0.009152  | 0        | 0        | 0.695731 | 8.928508 | 12.83466 | 2.009959 |
| 9450  | GGT6      | 4.041116 | 5.184287 | 1.729442 | 2.997664 | 0.002721  | 0.007654  | 0        | 0        | 0.695731 | 6.696381 | 12.83466 | 4.019918 |
| 13378 | TRNAM-Cd  | 1.990574 | 5.180727 | 2.431143 | 2.130984 | 0.03309   | 0.065758  | 0        | 0        | 0        | 8.928508 | 0        | 3.014938 |
| 4355  | LOC119629 | 15.33672 | 5.173055 | 1.012177 | 5.110822 | 3.21E-07  | 1.96E-06  | 0        | 0.547412 | 2.087194 | 37.94616 | 36.36488 | 15.07469 |
| 7065  | SFTPD     | 7.517994 | 5.172531 | 1.395725 | 3.705981 | 0.000211  | 0.000792  | 0        | 0.547412 | 0.695731 | 11.16063 | 25.66933 | 7.034856 |
| 12315 | LOC119624 | 1.938044 | 5.170973 | 2.207504 | 2.342453 | 0.019157  | 0.041349  | 0        | 0        | 0        | 4.464254 | 2.139111 | 5.024897 |
| 7302  | CTXND1    | 7.539519 | 5.170171 | 1.422491 | 3.634589 | 0.000278  | 0.001014  | 0        | 0.547412 | 0.695731 | 11.16063 | 27.80844 | 5.024897 |
| 12639 | LOC103227 | 2.0121   | 5.168332 | 2.274372 | 2.272422 | 0.023061  | 0.048503  | 0        | 0        | 0        | 8.928508 | 2.139111 | 1.004979 |
| 12640 | LOC119626 | 2.0121   | 5.168332 | 2.274372 | 2.272422 | 0.023061  | 0.048503  | 0        | 0        | 0        | 8.928508 | 2.139111 | 1.004979 |
| 4077  | LOC103224 | 19.4749  | 5.168247 | 0.972367 | 5.31512  | 1.07E-07  | 6.95E-07  | 0        | 0        | 3.478657 | 22.32127 | 59.8951  | 31.15436 |
| 12309 | LOC119624 | 1.975072 | 5.167925 | 2.206085 | 2.342577 | 0.019151  | 0.041346  | 0        | 0        | 0        | 6.696381 | 2.139111 | 3.014938 |
| 12310 | LOC119627 | 1.975072 | 5.167925 | 2.206085 | 2.342577 | 0.019151  | 0.041346  | 0        | 0        | 0        | 6.696381 | 2.139111 | 3.014938 |
| 12311 | LORICRIN  | 1.975072 | 5.167925 | 2.206085 | 2.342577 | 0.019151  | 0.041346  | 0        | 0        | 0        | 6.696381 | 2.139111 | 3.014938 |
| 12312 | CPA2      | 1.975072 | 5.167925 | 2.206085 | 2.342577 | 0.019151  | 0.041346  | 0        | 0        | 0        | 6.696381 | 2.139111 | 3.014938 |
| 12314 | LOC119627 | 1.975072 | 5.167925 | 2.206085 | 2.342577 | 0.019151  | 0.041346  | 0        | 0        | 0        | 6.696381 | 2.139111 | 3.014938 |
| 2296  | LOC119628 | 29.54494 | 5.166834 | 0.696098 | 7.422563 | 1.15E-13  | 1.33E-12  | 1.084173 | 1.094824 | 2.782925 | 51.33892 | 72.72976 | 48.23901 |
| 12349 | LOC119627 | 1.922541 | 5.162133 | 2.211451 | 2.334274 | 0.019581  | 0.042155  | 0        | 0        | 0        | 2.232127 | 4.278221 | 5.024897 |
| 5578  | SLC8A3    | 11.09391 | 5.160914 | 1.177773 | 4.381925 | 1.18E-05  | 5.61E-05  | 0        | 1.094824 | 0.695731 | 26.78552 | 29.94755 | 8.039836 |
| 3734  | LOC119627 | 23.22605 | 5.159989 | 0.919834 | 5.609699 | 2.03E-08  | 1.44E-07  | 0        | 0.547412 | 3.478657 | 62.49956 | 57.75599 | 15.07469 |
| 12203 | IL21      | 1.959569 | 5.158573 | 2.180556 | 2.365715 | 0.017995  | 0.039194  | 0        | 0        | 0        | 4.464254 | 4.278221 | 3.014938 |
| 12204 | LOC119627 | 1.959569 | 5.158573 | 2.180556 | 2.365715 | 0.017995  | 0.039194  | 0        | 0        | 0        | 4.464254 | 4.278221 | 3.014938 |
| 12205 | IL17A     | 1.959569 | 5.158573 | 2.180556 | 2.365715 | 0.017995  | 0.039194  | 0        | 0        | 0        | 4.464254 | 4.278221 | 3.014938 |
| 12482 | LOC119626 | 1.996597 | 5.157301 | 2.239069 | 2.303324 | 0.021261  | 0.045253  | 0        | 0        | 0        | 6.696381 | 4.278221 | 1.004979 |
| 12483 | CUNH11or  | 1.996597 | 5.157301 | 2.239069 | 2.303324 | 0.021261  | 0.045253  | 0        | 0        | 0        | 6.696381 | 4.278221 | 1.004979 |
| 12484 | LOC103247 | 1.996597 | 5.157301 | 2.239069 | 2.303324 | 0.021261  | 0.045253  | 0        | 0        | 0        | 6.696381 | 4.278221 | 1.004979 |
| 12486 | BEND2     | 1.996597 | 5.157301 | 2.239069 | 2.303324 | 0.021261  | 0.045253  | 0        | 0        | 0        | 6.696381 | 4.278221 | 1.004979 |
| 12487 | LOC119626 | 1.996597 | 5.157301 | 2.239069 | 2.303324 | 0.021261  | 0.045253  | 0        | 0        | 0        | 6.696381 | 4.278221 | 1.004979 |
| 12488 | LOC119627 | 1.996597 | 5.157301 | 2.239069 | 2.303324 | 0.021261  | 0.045253  | 0        | 0        | 0        | 6.696381 | 4.278221 | 1.004979 |
| 12489 | PRSS37    | 1.996597 | 5.157301 | 2.239069 | 2.303324 | 0.021261  | 0.045253  | 0        | 0        | 0        | 6.696381 | 4.278221 | 1.004979 |
| 12490 | LOC103237 | 1.996597 | 5.157301 | 2.239069 | 2.303324 | 0.021261  | 0.045253  | 0        | 0        | 0        | 6.696381 | 4.278221 | 1.004979 |
| 40    | SHISAL1   | 872.7307 | 5.150748 | 0.161919 | 31.81056 | 4.62E-222 | 3.07E-219 | 45.53526 | 42.69812 | 56.35424 | 1649.542 | 1567.968 | 1874.287 |
| 10695 | LOC103227 | 3.892579 | 5.150322 | 1.912452 | 2.693047 | 0.00708   | 0.0176    | 0        | 0        | 0.695731 | 15.62489 | 0        | 7.034856 |
| 12374 | GZMB      | 1.944066 | 5.150104 | 2.213665 | 2.326505 | 0.019992  | 0.042927  | 0        | 0        | 0        | 2.232127 | 6.417332 | 3.014938 |
| 12375 | NPY2R     | 1.944066 | 5.150104 | 2.213665 | 2.326505 | 0.019992  | 0.042927  | 0        | 0        | 0        | 2.232127 | 6.417332 | 3.014938 |
| 12376 | LOC119628 | 1.944066 | 5.150104 | 2.213665 | 2.326505 | 0.019992  | 0.042927  | 0        | 0        | 0        | 2.232127 | 6.417332 | 3.014938 |
| 12377 | LOC119628 | 1.944066 | 5.150104 | 2.213665 | 2.326505 | 0.019992  | 0.042927  | 0        | 0        | 0        | 2.232127 | 6.417332 | 3.014938 |
| 12378 | LOC119627 | 1.944066 | 5.150104 | 2.213665 | 2.326505 | 0.019992  | 0.042927  | 0        | 0        | 0        | 2.232127 | 6.417332 | 3.014938 |
| 12379 | LOC103237 | 1.944066 | 5.150104 | 2.213665 | 2.326505 | 0.019992  | 0.042927  | 0        | 0        | 0        | 2.232127 | 6.417332 | 3.014938 |
| 12380 | LOC103237 | 1.944066 | 5.150104 | 2.213665 | 2.326505 | 0.019992  | 0.042927  | 0        | 0        | 0        | 2.232127 | 6.417332 | 3.014938 |
| 12381 | LOC119628 | 1.944066 | 5.150104 | 2.213665 | 2.326505 | 0.019992  | 0.042927  | 0        | 0        | 0        | 2.232127 | 6.417332 | 3.014938 |
| 13476 | LOC119626 | 1.907038 | 5.148878 | 2.438474 | 2.111516 | 0.034728  | 0.0685    | 0        | 0        | 0        | 0        | 6.417332 | 5.024897 |
| 13477 | LOC119624 | 1.907038 | 5.148878 | 2.438474 | 2.111516 | 0.034728  | 0.0685    | 0        | 0        | 0        | 0        | 6.417332 | 5.024897 |
| 13478 | LOC103237 | 1.907038 | 5.148878 | 2.438474 | 2.111516 | 0.034728  | 0.0685    | 0        | 0        | 0        | 0        | 6.417332 | 5.024897 |



|       |           |          |          |          |          |          |          |          |          |          |          |          |          |
|-------|-----------|----------|----------|----------|----------|----------|----------|----------|----------|----------|----------|----------|----------|
| 4584  | MHC-DOA   | 15.14424 | 5.148586 | 1.039849 | 4.951283 | 7.37E-07 | 4.28E-06 | 0        | 0.547412 | 2.087194 | 31.24978 | 44.92132 | 12.05975 |
| 12527 | LOC103215 | 1.981094 | 5.148236 | 2.242746 | 2.295506 | 0.021704 | 0.046017 | 0        | 0        | 0        | 4.464254 | 6.417332 | 1.004979 |
| 12528 | MS4A14    | 1.981094 | 5.148236 | 2.242746 | 2.295506 | 0.021704 | 0.046017 | 0        | 0        | 0        | 4.464254 | 6.417332 | 1.004979 |
| 12529 | LOC119624 | 1.981094 | 5.148236 | 2.242746 | 2.295506 | 0.021704 | 0.046017 | 0        | 0        | 0        | 4.464254 | 6.417332 | 1.004979 |
| 12530 | LOC103218 | 1.981094 | 5.148236 | 2.242746 | 2.295506 | 0.021704 | 0.046017 | 0        | 0        | 0        | 4.464254 | 6.417332 | 1.004979 |
| 12532 | DUOXA2    | 1.981094 | 5.148236 | 2.242746 | 2.295506 | 0.021704 | 0.046017 | 0        | 0        | 0        | 4.464254 | 6.417332 | 1.004979 |
| 12533 | LOC119628 | 1.981094 | 5.148236 | 2.242746 | 2.295506 | 0.021704 | 0.046017 | 0        | 0        | 0        | 4.464254 | 6.417332 | 1.004979 |
| 12534 | CALML5    | 1.981094 | 5.148236 | 2.242746 | 2.295506 | 0.021704 | 0.046017 | 0        | 0        | 0        | 4.464254 | 6.417332 | 1.004979 |
| 12535 | LOC103215 | 1.981094 | 5.148236 | 2.242746 | 2.295506 | 0.021704 | 0.046017 | 0        | 0        | 0        | 4.464254 | 6.417332 | 1.004979 |
| 12537 | LOC103247 | 1.981094 | 5.148236 | 2.242746 | 2.295506 | 0.021704 | 0.046017 | 0        | 0        | 0        | 4.464254 | 6.417332 | 1.004979 |
| 12538 | LOC103228 | 1.981094 | 5.148236 | 2.242746 | 2.295506 | 0.021704 | 0.046017 | 0        | 0        | 0        | 4.464254 | 6.417332 | 1.004979 |
| 12539 | LOC103237 | 1.981094 | 5.148236 | 2.242746 | 2.295506 | 0.021704 | 0.046017 | 0        | 0        | 0        | 4.464254 | 6.417332 | 1.004979 |
| 422   | CXCL1     | 140.5768 | 5.147389 | 0.334431 | 15.39147 | 1.87E-53 | 1.18E-51 | 5.420864 | 7.663765 | 10.43597 | 319.1942 | 237.4413 | 263.3046 |
| 7119  | LOC103247 | 7.428011 | 5.147357 | 1.395035 | 3.689768 | 0.000224 | 0.000838 | 0        | 0.547412 | 0.695731 | 22.32127 | 14.97377 | 6.029877 |
| 13550 | LOC119628 | 1.928564 | 5.14297  | 2.45093  | 2.098375 | 0.035872 | 0.070355 | 0        | 0        | 0        | 8.556443 | 3.014938 |          |
| 13551 | LOC119618 | 1.928564 | 5.14297  | 2.45093  | 2.098375 | 0.035872 | 0.070355 | 0        | 0        | 0        | 8.556443 | 3.014938 |          |
| 13552 | LOC119615 | 1.928564 | 5.14297  | 2.45093  | 2.098375 | 0.035872 | 0.070355 | 0        | 0        | 0        | 8.556443 | 3.014938 |          |
| 13553 | LOC119615 | 1.928564 | 5.14297  | 2.45093  | 2.098375 | 0.035872 | 0.070355 | 0        | 0        | 0        | 8.556443 | 3.014938 |          |
| 13554 | LOC119620 | 1.928564 | 5.14297  | 2.45093  | 2.098375 | 0.035872 | 0.070355 | 0        | 0        | 0        | 8.556443 | 3.014938 |          |
| 12748 | ANKRD7    | 1.965592 | 5.140816 | 2.285736 | 2.249086 | 0.024507 | 0.051064 | 0        | 0        | 0        | 2.232127 | 8.556443 | 1.004979 |
| 12749 | LOC119627 | 1.965592 | 5.140816 | 2.285736 | 2.249086 | 0.024507 | 0.051064 | 0        | 0        | 0        | 2.232127 | 8.556443 | 1.004979 |
| 12750 | LOC103216 | 1.965592 | 5.140816 | 2.285736 | 2.249086 | 0.024507 | 0.051064 | 0        | 0        | 0        | 2.232127 | 8.556443 | 1.004979 |
| 12751 | LOC119615 | 1.965592 | 5.140816 | 2.285736 | 2.249086 | 0.024507 | 0.051064 | 0        | 0        | 0        | 2.232127 | 8.556443 | 1.004979 |
| 12752 | LOC119615 | 1.965592 | 5.140816 | 2.285736 | 2.249086 | 0.024507 | 0.051064 | 0        | 0        | 0        | 2.232127 | 8.556443 | 1.004979 |
| 12753 | LOC103214 | 1.965592 | 5.140816 | 2.285736 | 2.249086 | 0.024507 | 0.051064 | 0        | 0        | 0        | 2.232127 | 8.556443 | 1.004979 |
| 12754 | LOC119620 | 1.965592 | 5.140816 | 2.285736 | 2.249086 | 0.024507 | 0.051064 | 0        | 0        | 0        | 2.232127 | 8.556443 | 1.004979 |
| 12755 | LOC119620 | 1.965592 | 5.140816 | 2.285736 | 2.249086 | 0.024507 | 0.051064 | 0        | 0        | 0        | 2.232127 | 8.556443 | 1.004979 |
| 12756 | PRR35     | 1.965592 | 5.140816 | 2.285736 | 2.249086 | 0.024507 | 0.051064 | 0        | 0        | 0        | 2.232127 | 8.556443 | 1.004979 |
| 12757 | CD300LD   | 1.965592 | 5.140816 | 2.285736 | 2.249086 | 0.024507 | 0.051064 | 0        | 0        | 0        | 2.232127 | 8.556443 | 1.004979 |
| 12758 | SPPL2C    | 1.965592 | 5.140816 | 2.285736 | 2.249086 | 0.024507 | 0.051064 | 0        | 0        | 0        | 2.232127 | 8.556443 | 1.004979 |
| 12759 | LOC119623 | 1.965592 | 5.140816 | 2.285736 | 2.249086 | 0.024507 | 0.051064 | 0        | 0        | 0        | 2.232127 | 8.556443 | 1.004979 |
| 7359  | LRTM1     | 7.418531 | 5.140294 | 1.422414 | 3.613781 | 0.000302 | 0.00109  | 0        | 0.547412 | 0.695731 | 17.85702 | 21.39111 | 4.019918 |
| 13880 | LOC119624 | 1.950089 | 5.139189 | 2.527484 | 2.033322 | 0.04202  | 0.080471 | 0        | 0        | 0        | 10.69555 | 1.004979 |          |
| 13881 | LOC119627 | 1.950089 | 5.139189 | 2.527484 | 2.033322 | 0.04202  | 0.080471 | 0        | 0        | 0        | 10.69555 | 1.004979 |          |
| 13882 | LOC103234 | 1.950089 | 5.139189 | 2.527484 | 2.033322 | 0.04202  | 0.080471 | 0        | 0        | 0        | 10.69555 | 1.004979 |          |
| 9575  | LOC119623 | 24.50977 | 5.139156 | 1.732238 | 2.966772 | 0.003009 | 0.008356 | 0        | 0        | 4.174388 | 44.64254 | 79.14709 | 19.09461 |
| 9919  | AWAT1     | 3.93563  | 5.135714 | 1.7832   | 2.880054 | 0.003976 | 0.010657 | 0        | 0        | 0.695731 | 15.62489 | 4.278221 | 3.014938 |
| 10289 | CD69      | 3.957155 | 5.134242 | 1.839572 | 2.790997 | 0.005255 | 0.013577 | 0        | 0        | 0.695731 | 15.62489 | 6.417332 | 1.004979 |
| 9618  | HS3ST4    | 3.793541 | 5.13355  | 1.736812 | 2.955731 | 0.003119 | 0.008622 | 0        | 0        | 0.695731 | 4.464254 | 8.556443 | 9.044815 |
| 756   | PILRA     | 102.0255 | 5.132079 | 0.412486 | 12.44184 | 1.55E-35 | 5.45E-34 | 3.252518 | 3.284471 | 11.1317  | 207.5878 | 216.0502 | 170.8465 |
| 4456  | DYDC1     | 14.86566 | 5.131392 | 1.018633 | 5.037528 | 4.72E-07 | 2.81E-06 | 0        | 0.547412 | 2.087194 | 24.5534  | 44.92132 | 17.08465 |
| 9761  | STPG3     | 3.920127 | 5.129326 | 1.760586 | 2.913419 | 0.003575 | 0.009737 | 0        | 0        | 0.695731 | 13.39276 | 6.417332 | 3.014938 |
| 5311  | KLK1      | 15.37993 | 5.129163 | 1.136515 | 4.513064 | 6.39E-06 | 3.20E-05 | 0        | 0        | 2.782925 | 13.39276 | 62.03421 | 14.06971 |
| 8242  | LOC103244 | 7.043315 | 5.127822 | 1.538407 | 3.333203 | 0.000859 | 0.002769 | 0        | 1.094824 | 0        | 15.62489 | 23.53022 | 2.009959 |
| 9540  | KBTBD13   | 3.867597 | 5.125894 | 1.723425 | 2.974249 | 0.002937 | 0.008185 | 0        | 0        | 0.695731 | 8.928508 | 8.556443 | 5.024897 |
| 9617  | LOC103237 | 3.827374 | 5.121722 | 1.732708 | 2.955907 | 0.003118 | 0.008618 | 0        | 0.547412 | 0        | 6.696381 | 10.69555 | 5.024897 |
| 9955  | LOC119627 | 3.799563 | 5.121004 | 1.781996 | 2.873746 | 0.004056 | 0.010833 | 0        | 0        | 0.695731 | 2.232127 | 12.83466 | 7.034856 |
| 10264 | FPR3      | 3.910647 | 5.118655 | 1.829417 | 2.79797  | 0.005142 | 0.01332  | 0        | 0        | 0.695731 | 8.928508 | 12.83466 | 1.004979 |
| 6150  | LOC119624 | 11.11517 | 5.116494 | 1.248935 | 4.096686 | 4.19E-05 | 0.000181 | 0        | 0.547412 | 1.391463 | 20.08914 | 40.6431  | 4.019918 |
| 7626  | ZC3H12D   | 6.932231 | 5.116454 | 1.454493 | 3.517689 | 0.000435 | 0.001518 | 0        | 1.094824 | 0        | 8.928508 | 23.53022 | 8.039836 |
| 9830  | LOC103238 | 3.848899 | 5.11548  | 1.764633 | 2.898892 | 0.003745 | 0.010127 | 0        | 0.547412 | 0        | 6.696381 | 12.83466 | 3.014938 |
| 9811  | LOC103247 | 3.873619 | 5.115322 | 1.762333 | 2.902586 | 0.003701 | 0.010029 | 0        | 0        | 0.695731 | 6.696381 | 12.83466 | 3.014938 |
| 10009 | CD14      | 3.833396 | 5.112263 | 1.788611 | 2.858232 | 0.00426  | 0.011313 | 0        | 0.547412 | 0        | 4.464254 | 14.97377 | 3.014938 |
| 10011 | LOC103230 | 3.833396 | 5.112263 | 1.788611 | 2.858232 | 0.00426  | 0.011313 | 0        | 0.547412 | 0        | 4.464254 | 14.97377 | 3.014938 |
| 10526 | CCL19     | 3.879642 | 5.111633 | 1.866596 | 2.738478 | 0.006172 | 0.015587 | 0        | 0        | 0.695731 | 4.464254 | 17.11289 | 1.004979 |
| 10304 | LOC103214 | 3.842614 | 5.109903 | 1.833141 | 2.787512 | 0.005311 | 0.013704 | 0        | 0        | 0.695731 | 2.232127 | 17.11289 | 3.014938 |
| 7259  | LMLN2     | 7.351127 | 5.107567 | 1.399393 | 3.649844 | 0.000262 | 0.000961 | 0        | 0        | 1.391463 | 20.08914 | 8.556443 | 14.06971 |
| 4445  | LOC119615 | 13.68314 | 5.102275 | 1.011033 | 5.046597 | 4.50E-07 | 2.69E-06 | 1.084173 | 1.094824 | 0        | 22.32127 | 38.50399 | 19.09461 |
| 5058  | LY6L      | 15.10999 | 5.102081 | 1.095749 | 4.656249 | 3.22E-06 | 1.69E-05 | 0        | 0        | 2.782925 | 46.87467 | 29.94755 | 11.05477 |
| 5337  | LOC103225 | 13.71807 | 5.101615 | 1.13464  | 4.496239 | 6.92E-06 | 3.45E-05 | 0        | 2.189647 | 0        | 35.71403 | 36.36488 | 8.039836 |
| 4480  | KLK5      | 14.52465 | 5.097199 | 1.014558 | 5.02406  | 5.06E-07 | 3.00E-06 | 0        | 0.547412 | 2.087194 | 26.78552 | 40.6431  | 17.08465 |
| 5408  | LOC119623 | 10.57352 | 5.096347 | 1.143031 | 4.458625 | 8.25E-06 | 4.05E-05 | 0.542086 | 0        | 1.391463 | 24.5534  | 12.83466 | 24.11951 |
| 3345  | ITGA9     | 21.06396 | 5.089373 | 0.848219 | 6.00007  | 1.97E-09 | 1.57E-08 | 1.084173 | 1.094824 | 1.391463 | 49.10679 | 55.61688 | 18.08963 |
| 8112  | LOC103227 | 6.869796 | 5.088356 | 1.507309 | 3.375788 | 0.000736 | 0.002412 | 0        | 1.094824 | 0        | 17.85702 | 19.252   | 3.014938 |
| 5822  | LOC103238 | 11.12183 | 5.087021 | 1.193675 | 4.261645 | 2.03E-05 | 9.27E-05 | 0        | 0        | 2.087194 | 26.78552 | 27.80844 | 10.04979 |
| 348   | PIK3IP1   | 169.632  | 5.086733 | 0.309387 | 16.44132 | 9.68E-61 | 7.39E-59 | 9.757555 | 10.94824 | 8.348776 | 334.819  | 260.9715 | 392.947  |
| 16    | SLC2A2    | 2269.865 | 5.08617  | 0.11719  | 43.40113 | 0        | 0        | 130.6428 | 115.5039 | 144.7121 | 4357.112 | 4348.812 | 4522.408 |
| 7507  | LOC103215 | 7.39072  | 5.084195 | 1.429791 | 3.555901 | 0.000377 | 0.001334 | 0        | 0        | 1.391463 | 13.39276 | 23.53022 | 6.029877 |
| 5931  | TF        | 10.50788 | 5.081464 | 1.211791 | 4.193349 | 2.75E-05 | 0.000123 | 0        | 1.094824 | 0.695731 | 17.85702 | 36.36488 | 7.034856 |
| 8074  | LOC103237 | 6.786259 | 5.078475 | 1.497646 | 3.390971 | 0.000696 | 0.002293 | 0        | 1.094824 | 0        | 8.928508 | 25.66933 | 5.024897 |
| 5593  | LOC103247 | 10.74059 | 5.078409 | 1.1604   | 4.37643  | 1.21E-05 | 5.73E-05 | 0        | 0.547412 | 1.391463 | 26.78552 | 25.66933 | 10.04979 |
| 6388  | CDH12     | 10.44456 | 5.066568 | 1.271974 | 3.983232 | 6.80E-05 | 0.000283 | 0.542086 | 0.547412 | 0.695731 | 26.78552 | 32.08666 | 2.009959 |
| 7385  | ERVV-2    | 7.226681 | 5.062957 | 1.404107 | 3.60582  | 0.000311 | 0.00112  | 0        | 0        | 1.391463 | 20.08914 | 12.83466 | 9.044815 |
| 15398 | LOC119620 | 1.860106 | 5.062307 | 2.876798 | 1.759702 | 0.078458 | 0.135451 | 0        | 0        | 0        | 11.16063 | 0        | 0        |



|       |           |          |          |          |          |          |          |          |          |          |          |          |          |
|-------|-----------|----------|----------|----------|----------|----------|----------|----------|----------|----------|----------|----------|----------|
| 9782  | DUSP21    | 3.678575 | 5.061873 | 1.740027 | 2.909077 | 0.003625 | 0.009852 | 0        | 0        | 0.695731 | 8.928508 | 6.417332 | 6.029877 |
| 9914  | LOC119622 | 3.601324 | 5.061291 | 1.756739 | 2.881072 | 0.003963 | 0.010628 | 0        | 0.547412 | 0        | 4.464254 | 8.556443 | 8.039836 |
| 10243 | LOC119622 | 3.752631 | 5.058593 | 1.803799 | 2.80441  | 0.005041 | 0.013083 | 0        | 0        | 0.695731 | 13.39276 | 6.417332 | 2.009959 |
| 9950  | LOC103222 | 3.690883 | 5.058497 | 1.759339 | 2.875226 | 0.004037 | 0.010787 | 0        | 0.547412 | 0        | 11.16063 | 6.417332 | 4.019918 |
| 9925  | ATP1B2    | 3.715603 | 5.058355 | 1.756888 | 2.879156 | 0.003987 | 0.010681 | 0        | 0        | 0.695731 | 11.16063 | 6.417332 | 4.019918 |
| 3870  | FBN2      | 17.50852 | 5.057384 | 0.923253 | 5.477786 | 4.31E-08 | 2.96E-07 | 0        | 1.094824 | 2.087194 | 35.71403 | 47.06043 | 19.09461 |
| 7465  | LOC119622 | 7.232703 | 5.05592  | 1.414268 | 3.574938 | 0.00035  | 0.001248 | 0        | 0        | 1.391463 | 17.85702 | 17.11289 | 7.034856 |
| 7397  | CCRL2     | 7.180173 | 5.055387 | 1.403901 | 3.600956 | 0.000317 | 0.001139 | 0        | 0        | 1.391463 | 13.39276 | 19.252   | 9.044815 |
| 9896  | PEAK3     | 3.7001   | 5.053203 | 1.751172 | 2.885611 | 0.003907 | 0.010495 | 0        | 0        | 0.695731 | 8.928508 | 8.556443 | 4.019918 |
| 4870  | LOC119622 | 13.95051 | 5.051994 | 1.061509 | 4.759257 | 1.94E-06 | 1.06E-05 | 0        | 1.094824 | 1.391463 | 37.94616 | 34.22577 | 9.044815 |
| 9977  | LOC103242 | 3.659877 | 5.048892 | 1.760674 | 2.86759  | 0.004136 | 0.011021 | 0        | 0.547412 | 0        | 6.696381 | 10.69555 | 4.019918 |
| 9966  | RBMXL2    | 3.684597 | 5.048762 | 1.758191 | 2.871566 | 0.004084 | 0.010894 | 0        | 0        | 0.695731 | 6.696381 | 10.69555 | 4.019918 |
| 9967  | GJD2      | 3.684597 | 5.048762 | 1.758191 | 2.871566 | 0.004084 | 0.010894 | 0        | 0        | 0.695731 | 6.696381 | 10.69555 | 4.019918 |
| 5753  | LOC103222 | 10.54208 | 5.048549 | 1.17469  | 4.29777  | 1.73E-05 | 7.97E-05 | 0        | 0.547412 | 1.391463 | 22.32127 | 29.94755 | 9.044815 |
| 4966  | LOC103242 | 14.49641 | 5.048067 | 1.072753 | 4.705714 | 2.53E-06 | 1.35E-05 | 0        | 0        | 2.782925 | 40.17829 | 29.94755 | 14.06971 |
| 10216 | LOC103212 | 3.721625 | 5.047889 | 1.79512  | 2.812006 | 0.004923 | 0.012811 | 0        | 0        | 0.695731 | 8.928508 | 10.69555 | 2.009959 |
| 10217 | LOC103222 | 3.721625 | 5.047889 | 1.79512  | 2.812006 | 0.004923 | 0.012811 | 0        | 0        | 0.695731 | 8.928508 | 10.69555 | 2.009959 |
| 8023  | AVPR1A    | 7.275754 | 5.045044 | 1.481319 | 3.405779 | 0.00066  | 0.002186 | 0        | 0        | 1.391463 | 17.85702 | 21.39111 | 3.014938 |
| 14070 | DHRS7C    | 1.823078 | 5.044765 | 2.522819 | 1.999654 | 0.045538 | 0.086036 | 0        | 0        | 0        | 8.928508 | 0        | 2.009959 |
| 14071 | LOC103212 | 1.823078 | 5.044765 | 2.522819 | 1.999654 | 0.045538 | 0.086036 | 0        | 0        | 0        | 8.928508 | 0        | 2.009959 |
| 7345  | ART1      | 6.823917 | 5.044419 | 1.394238 | 3.618047 | 0.000297 | 0.001074 | 0        | 0.547412 | 0.695731 | 20.08914 | 8.556443 | 11.05477 |
| 11140 | FBXW12    | 3.616564 | 5.044383 | 1.944801 | 2.593778 | 0.009493 | 0.022654 | 0        | 0        | 0.695731 | 0        | 14.97377 | 6.029877 |
| 3925  | PHACTR3   | 17.34102 | 5.041474 | 0.929313 | 5.424946 | 5.80E-08 | 3.93E-07 | 0        | 1.094824 | 2.087194 | 35.71403 | 47.06043 | 18.08963 |
| 14341 | LOC103222 | 1.844603 | 5.041057 | 2.579562 | 1.95423  | 0.050674 | 0.093932 | 0        | 0        | 0        | 8.928508 | 2.139111 | 0        |
| 14342 | LOC119622 | 1.844603 | 5.041057 | 2.579562 | 1.95423  | 0.050674 | 0.093932 | 0        | 0        | 0        | 8.928508 | 2.139111 | 0        |
| 13975 | LOC103222 | 1.78605  | 5.040639 | 2.499483 | 2.016673 | 0.04373  | 0.083188 | 0        | 0        | 0        | 6.696381 | 0        | 4.019918 |
| 10450 | LOC119612 | 3.69062  | 5.040357 | 1.829522 | 2.755013 | 0.005869 | 0.014929 | 0        | 0        | 0.695731 | 4.464254 | 14.97377 | 2.009959 |
| 10451 | LOC103242 | 3.69062  | 5.040357 | 1.829522 | 2.755013 | 0.005869 | 0.014929 | 0        | 0        | 0.695731 | 4.464254 | 14.97377 | 2.009959 |
| 10726 | LOC103222 | 3.675117 | 5.038148 | 1.875941 | 2.685665 | 0.007239 | 0.017941 | 0        | 0        | 0.695731 | 2.232127 | 17.11289 | 2.009959 |
| 5929  | TMEM30B   | 10.7498  | 5.03579  | 1.200547 | 4.194579 | 2.73E-05 | 0.000123 | 0        | 0        | 2.087194 | 24.5534  | 27.80844 | 10.04979 |
| 7850  | LOC119622 | 6.909131 | 5.032403 | 1.45743  | 3.452929 | 0.000555 | 0.001878 | 0.542086 | 0        | 0.695731 | 20.08914 | 17.11289 | 3.014938 |
| 12937 | LOC119622 | 1.770547 | 5.031791 | 2.271345 | 2.215335 | 0.026737 | 0.054941 | 0        | 0        | 0        | 4.464254 | 2.139111 | 4.019918 |
| 14203 | LOC103222 | 1.8291   | 5.028896 | 2.545126 | 1.975893 | 0.048167 | 0.090108 | 0        | 0        | 0        | 6.696381 | 4.278221 | 0        |
| 14204 | ASPN      | 1.8291   | 5.028896 | 2.545126 | 1.975893 | 0.048167 | 0.090108 | 0        | 0        | 0        | 6.696381 | 4.278221 | 0        |
| 14205 | WNT6      | 1.8291   | 5.028896 | 2.545126 | 1.975893 | 0.048167 | 0.090108 | 0        | 0        | 0        | 6.696381 | 4.278221 | 0        |
| 14206 | LOC119612 | 1.8291   | 5.028896 | 2.545126 | 1.975893 | 0.048167 | 0.090108 | 0        | 0        | 0        | 6.696381 | 4.278221 | 0        |
| 14207 | LOC119622 | 1.8291   | 5.028896 | 2.545126 | 1.975893 | 0.048167 | 0.090108 | 0        | 0        | 0        | 6.696381 | 4.278221 | 0        |
| 14208 | TMPRSS11  | 1.8291   | 5.028896 | 2.545126 | 1.975893 | 0.048167 | 0.090108 | 0        | 0        | 0        | 6.696381 | 4.278221 | 0        |
| 14209 | LOC119622 | 1.8291   | 5.028896 | 2.545126 | 1.975893 | 0.048167 | 0.090108 | 0        | 0        | 0        | 6.696381 | 4.278221 | 0        |
| 14210 | RAB19     | 1.8291   | 5.028896 | 2.545126 | 1.975893 | 0.048167 | 0.090108 | 0        | 0        | 0        | 6.696381 | 4.278221 | 0        |
| 14211 | LOC119622 | 1.8291   | 5.028896 | 2.545126 | 1.975893 | 0.048167 | 0.090108 | 0        | 0        | 0        | 6.696381 | 4.278221 | 0        |
| 13026 | LOC103212 | 1.807575 | 5.028343 | 2.286463 | 2.19918  | 0.027865 | 0.056857 | 0        | 0        | 0        | 6.696381 | 2.139111 | 2.009959 |
| 13027 | LOC103232 | 1.807575 | 5.028343 | 2.286463 | 2.19918  | 0.027865 | 0.056857 | 0        | 0        | 0        | 6.696381 | 2.139111 | 2.009959 |
| 13028 | TAS2R40   | 1.807575 | 5.028343 | 2.286463 | 2.19918  | 0.027865 | 0.056857 | 0        | 0        | 0        | 6.696381 | 2.139111 | 2.009959 |
| 13029 | PPP1R2C   | 1.807575 | 5.028343 | 2.286463 | 2.19918  | 0.027865 | 0.056857 | 0        | 0        | 0        | 6.696381 | 2.139111 | 2.009959 |
| 12984 | ANGPTL5   | 1.755044 | 5.022085 | 2.276011 | 2.206529 | 0.027347 | 0.055989 | 0        | 0        | 0        | 2.232127 | 4.278221 | 4.019918 |
| 12985 | LOC119622 | 1.755044 | 5.022085 | 2.276011 | 2.206529 | 0.027347 | 0.055989 | 0        | 0        | 0        | 2.232127 | 4.278221 | 4.019918 |
| 8947  | TEX55     | 6.534802 | 5.018661 | 1.602011 | 3.132725 | 0.001732 | 0.005146 | 0        | 1.094824 | 0        | 17.85702 | 19.252   | 1.004979 |
| 14253 | LOC103242 | 1.813598 | 5.018419 | 2.550713 | 1.967457 | 0.049131 | 0.091575 | 0        | 0        | 0        | 4.464254 | 6.417332 | 0        |
| 14255 | LOC119622 | 1.813598 | 5.018419 | 2.550713 | 1.967457 | 0.049131 | 0.091575 | 0        | 0        | 0        | 4.464254 | 6.417332 | 0        |
| 14257 | NXPE1     | 1.813598 | 5.018419 | 2.550713 | 1.967457 | 0.049131 | 0.091575 | 0        | 0        | 0        | 4.464254 | 6.417332 | 0        |
| 14258 | LOC119612 | 1.813598 | 5.018419 | 2.550713 | 1.967457 | 0.049131 | 0.091575 | 0        | 0        | 0        | 4.464254 | 6.417332 | 0        |
| 14259 | LOC119612 | 1.813598 | 5.018419 | 2.550713 | 1.967457 | 0.049131 | 0.091575 | 0        | 0        | 0        | 4.464254 | 6.417332 | 0        |
| 14260 | LOC119612 | 1.813598 | 5.018419 | 2.550713 | 1.967457 | 0.049131 | 0.091575 | 0        | 0        | 0        | 4.464254 | 6.417332 | 0        |
| 14261 | LOC103222 | 1.813598 | 5.018419 | 2.550713 | 1.967457 | 0.049131 | 0.091575 | 0        | 0        | 0        | 4.464254 | 6.417332 | 0        |
| 14262 | LOC103232 | 1.813598 | 5.018419 | 2.550713 | 1.967457 | 0.049131 | 0.091575 | 0        | 0        | 0        | 4.464254 | 6.417332 | 0        |
| 14263 | LOC103242 | 1.813598 | 5.018419 | 2.550713 | 1.967457 | 0.049131 | 0.091575 | 0        | 0        | 0        | 4.464254 | 6.417332 | 0        |
| 12902 | LCE6A     | 1.792072 | 5.017677 | 2.261639 | 2.218602 | 0.026514 | 0.054578 | 0        | 0        | 0        | 4.464254 | 4.278221 | 2.009959 |
| 12903 | CSR3      | 1.792072 | 5.017677 | 2.261639 | 2.218602 | 0.026514 | 0.054578 | 0        | 0        | 0        | 4.464254 | 4.278221 | 2.009959 |
| 12904 | SLC7A13   | 1.792072 | 5.017677 | 2.261639 | 2.218602 | 0.026514 | 0.054578 | 0        | 0        | 0        | 4.464254 | 4.278221 | 2.009959 |
| 12905 | TAAR8     | 1.792072 | 5.017677 | 2.261639 | 2.218602 | 0.026514 | 0.054578 | 0        | 0        | 0        | 4.464254 | 4.278221 | 2.009959 |
| 12906 | LOC119622 | 1.792072 | 5.017677 | 2.261639 | 2.218602 | 0.026514 | 0.054578 | 0        | 0        | 0        | 4.464254 | 4.278221 | 2.009959 |
| 12908 | CETN1     | 1.792072 | 5.017677 | 2.261639 | 2.218602 | 0.026514 | 0.054578 | 0        | 0        | 0        | 4.464254 | 4.278221 | 2.009959 |
| 12909 | F13B      | 1.792072 | 5.017677 | 2.261639 | 2.218602 | 0.026514 | 0.054578 | 0        | 0        | 0        | 4.464254 | 4.278221 | 2.009959 |
| 12910 | FMO3      | 1.792072 |          |          |          |          |          |          |          |          |          |          |          |



|       |           |          |          |          |          |          |          |          |          |          |          |          |          |
|-------|-----------|----------|----------|----------|----------|----------|----------|----------|----------|----------|----------|----------|----------|
| 14475 | TCHHL1    | 1.798095 | 5.009415 | 2.596405 | 1.929366 | 0.053685 | 0.098579 | 0        | 0        | 0        | 2.232127 | 8.556443 | 0        |
| 14476 | LOC103231 | 1.798095 | 5.009415 | 2.596405 | 1.929366 | 0.053685 | 0.098579 | 0        | 0        | 0        | 2.232127 | 8.556443 | 0        |
| 14477 | LOC119621 | 1.798095 | 5.009415 | 2.596405 | 1.929366 | 0.053685 | 0.098579 | 0        | 0        | 0        | 2.232127 | 8.556443 | 0        |
| 14478 | LOC103231 | 1.798095 | 5.009415 | 2.596405 | 1.929366 | 0.053685 | 0.098579 | 0        | 0        | 0        | 2.232127 | 8.556443 | 0        |
| 13134 | LOC103231 | 1.77657  | 5.008656 | 2.295441 | 2.182001 | 0.029109 | 0.058881 | 0        | 0        | 0        | 2.232127 | 6.417332 | 2.009959 |
| 13135 | TAAR4     | 1.77657  | 5.008656 | 2.295441 | 2.182001 | 0.029109 | 0.058881 | 0        | 0        | 0        | 2.232127 | 6.417332 | 2.009959 |
| 13136 | LOC103211 | 1.77657  | 5.008656 | 2.295441 | 2.182001 | 0.029109 | 0.058881 | 0        | 0        | 0        | 2.232127 | 6.417332 | 2.009959 |
| 13137 | NXPH2     | 1.77657  | 5.008656 | 2.295441 | 2.182001 | 0.029109 | 0.058881 | 0        | 0        | 0        | 2.232127 | 6.417332 | 2.009959 |
| 13140 | LRRC52    | 1.77657  | 5.008656 | 2.295441 | 2.182001 | 0.029109 | 0.058881 | 0        | 0        | 0        | 2.232127 | 6.417332 | 2.009959 |
| 13141 | TMPRSS11  | 1.77657  | 5.008656 | 2.295441 | 2.182001 | 0.029109 | 0.058881 | 0        | 0        | 0        | 2.232127 | 6.417332 | 2.009959 |
| 13142 | LOC119621 | 1.77657  | 5.008656 | 2.295441 | 2.182001 | 0.029109 | 0.058881 | 0        | 0        | 0        | 2.232127 | 6.417332 | 2.009959 |
| 13143 | MAGEE2    | 1.77657  | 5.008656 | 2.295441 | 2.182001 | 0.029109 | 0.058881 | 0        | 0        | 0        | 2.232127 | 6.417332 | 2.009959 |
| 15685 | GUCA2B    | 1.782592 | 5.007607 | 2.912289 | 1.719475 | 0.085528 | 0.144927 | 0        | 0        | 0        | 0        | 10.69555 | 0        |
| 15686 | LOC119624 | 1.782592 | 5.007607 | 2.912289 | 1.719475 | 0.085528 | 0.144927 | 0        | 0        | 0        | 0        | 10.69555 | 0        |
| 15687 | LHCGR     | 1.782592 | 5.007607 | 2.912289 | 1.719475 | 0.085528 | 0.144927 | 0        | 0        | 0        | 0        | 10.69555 | 0        |
| 15688 | LYZL1     | 1.782592 | 5.007607 | 2.912289 | 1.719475 | 0.085528 | 0.144927 | 0        | 0        | 0        | 0        | 10.69555 | 0        |
| 15689 | LOC119619 | 1.782592 | 5.007607 | 2.912289 | 1.719475 | 0.085528 | 0.144927 | 0        | 0        | 0        | 0        | 10.69555 | 0        |
| 6132  | ATP13A5   | 10.01488 | 5.006453 | 1.219846 | 4.104168 | 4.06E-05 | 0.000176 | 0        | 1.094824 | 0.695731 | 22.32127 | 29.94755 | 6.029877 |
| 8053  | LOC103241 | 7.055727 | 5.003773 | 1.472438 | 3.398291 | 0.000678 | 0.002239 | 0        | 0        | 1.391463 | 13.39276 | 23.53022 | 4.019918 |
| 14277 | TEX53     | 1.761067 | 5.003162 | 2.545991 | 1.965114 | 0.049401 | 0.091938 | 0        | 0        | 0        | 0        | 8.556443 | 2.009959 |
| 14278 | LOC119620 | 1.761067 | 5.003162 | 2.545991 | 1.965114 | 0.049401 | 0.091938 | 0        | 0        | 0        | 0        | 8.556443 | 2.009959 |
| 14279 | LOC119624 | 1.761067 | 5.003162 | 2.545991 | 1.965114 | 0.049401 | 0.091938 | 0        | 0        | 0        | 0        | 8.556443 | 2.009959 |
| 14281 | LOC119620 | 1.761067 | 5.003162 | 2.545991 | 1.965114 | 0.049401 | 0.091938 | 0        | 0        | 0        | 0        | 8.556443 | 2.009959 |
| 14282 | LOC119620 | 1.761067 | 5.003162 | 2.545991 | 1.965114 | 0.049401 | 0.091938 | 0        | 0        | 0        | 0        | 8.556443 | 2.009959 |
| 14284 | LOC103241 | 1.761067 | 5.003162 | 2.545991 | 1.965114 | 0.049401 | 0.091938 | 0        | 0        | 0        | 0        | 8.556443 | 2.009959 |
| 14285 | ZBPB2     | 1.761067 | 5.003162 | 2.545991 | 1.965114 | 0.049401 | 0.091938 | 0        | 0        | 0        | 0        | 8.556443 | 2.009959 |
| 7955  | LOC119621 | 6.966168 | 5.001913 | 1.460937 | 3.423771 | 0.000618 | 0.002064 | 0        | 0        | 1.391463 | 6.696381 | 25.66933 | 8.039836 |
| 5737  | TNF       | 10.17954 | 5.001773 | 1.161504 | 4.306289 | 1.66E-05 | 7.69E-05 | 0        | 0.547412 | 1.391463 | 24.5534  | 23.53022 | 11.05477 |
| 8139  | LOC119620 | 6.987693 | 4.996885 | 1.483895 | 3.367411 | 0.000759 | 0.002478 | 0        | 0        | 1.391463 | 6.696381 | 27.80844 | 6.029877 |
| 6014  | GJA10     | 10.20709 | 4.994586 | 1.201056 | 4.158496 | 3.20E-05 | 0.000142 | 0        | 0.547412 | 1.391463 | 22.32127 | 29.94755 | 7.034856 |
| 4825  | LOC119621 | 13.38344 | 4.994583 | 1.041427 | 4.795902 | 1.62E-06 | 8.92E-06 | 0        | 1.094824 | 1.391463 | 37.94616 | 27.80844 | 12.05975 |
| 7559  | CLEC4E    | 6.759078 | 4.991357 | 1.410524 | 3.538654 | 0.000402 | 0.001414 | 0        | 0        | 1.391463 | 13.39276 | 10.69555 | 15.07469 |
| 10143 | LOC119620 | 3.44933  | 4.990156 | 1.764759 | 2.82767  | 0.004689 | 0.012289 | 0        | 0.547412 | 0        | 6.696381 | 6.417332 | 7.034856 |
| 8206  | INSM1     | 6.727019 | 4.987756 | 1.491406 | 3.344331 | 0.000825 | 0.002672 | 0        | 0.547412 | 0.695731 | 17.85702 | 19.252   | 2.009959 |
| 7619  | GABRR1    | 6.652963 | 4.98612  | 1.416564 | 3.519869 | 0.000432 | 0.001507 | 0        | 0.547412 | 0.695731 | 13.39276 | 19.252   | 6.029877 |
| 7836  | EGFL6     | 6.689991 | 4.985713 | 1.442348 | 3.456663 | 0.000547 | 0.001855 | 0        | 0.547412 | 0.695731 | 15.62489 | 19.252   | 4.019918 |
| 10152 | LOC103244 | 3.511078 | 4.985473 | 1.764661 | 2.825173 | 0.004726 | 0.012375 | 0        | 0        | 0.695731 | 8.928508 | 6.417332 | 5.024897 |
| 7622  | CLEC6A    | 6.600432 | 4.985297 | 1.416513 | 3.519414 | 0.000433 | 0.001509 | 0        | 0.547412 | 0.695731 | 8.928508 | 21.39111 | 8.039836 |
| 10331 | LOC119619 | 3.548106 | 4.982581 | 1.791461 | 2.781295 | 0.005414 | 0.013933 | 0        | 0        | 0.695731 | 11.16063 | 6.417332 | 3.014938 |
| 10195 | TTC29     | 3.470855 | 4.98059  | 1.768118 | 2.816887 | 0.004849 | 0.012644 | 0        | 0.547412 | 0        | 6.696381 | 8.556443 | 5.024897 |
| 10196 | LOC119621 | 3.470855 | 4.98059  | 1.768118 | 2.816887 | 0.004849 | 0.012644 | 0        | 0.547412 | 0        | 6.696381 | 8.556443 | 5.024897 |
| 4019  | GALNTL6   | 20.84901 | 4.980587 | 0.929685 | 5.357287 | 8.45E-08 | 5.59E-07 | 0        | 0        | 4.174388 | 40.17829 | 55.61688 | 25.12449 |
| 6412  | LOC119621 | 10.46734 | 4.980584 | 1.253101 | 3.974608 | 7.05E-05 | 0.000292 | 0        | 0        | 2.087194 | 29.01765 | 25.66933 | 6.029877 |
| 5097  | LOC119621 | 13.6032  | 4.980387 | 1.075423 | 4.631095 | 3.64E-06 | 1.90E-05 | 0        | 0.547412 | 2.087194 | 35.71403 | 34.22577 | 9.044815 |
| 10780 | CUNH13or  | 3.544911 | 4.980243 | 1.862868 | 2.673428 | 0.007508 | 0.018511 | 0        | 0.547412 | 0        | 11.16063 | 8.556443 | 1.004979 |
| 7943  | SYCE1     | 6.913213 | 4.976458 | 1.452832 | 3.425349 | 0.000614 | 0.002055 | 0        | 0        | 1.391463 | 20.08914 | 14.97377 | 5.024897 |
| 10384 | LOC119621 | 3.492381 | 4.972557 | 1.79564  | 2.769239 | 0.005619 | 0.014384 | 0        | 0.547412 | 0        | 6.696381 | 10.69555 | 3.014938 |
| 10385 | LOC119619 | 3.492381 | 4.972557 | 1.79564  | 2.769239 | 0.005619 | 0.014384 | 0        | 0.547412 | 0        | 6.696381 | 10.69555 | 3.014938 |
| 10893 | CYLC2     | 3.513906 | 4.970394 | 1.874401 | 2.651724 | 0.008008 | 0.019544 | 0        | 0.547412 | 0        | 6.696381 | 12.83466 | 1.004979 |
| 10870 | FOXB2     | 3.538626 | 4.970179 | 1.871663 | 2.655488 | 0.007919 | 0.019365 | 0        | 0        | 0.695731 | 6.696381 | 12.83466 | 1.004979 |
| 10871 | SLC17A6   | 3.538626 | 4.970179 | 1.871663 | 2.655488 | 0.007919 | 0.019365 | 0        | 0        | 0.695731 | 6.696381 | 12.83466 | 1.004979 |
| 10872 | LOC103211 | 3.538626 | 4.970179 | 1.871663 | 2.655488 | 0.007919 | 0.019365 | 0        | 0        | 0.695731 | 6.696381 | 12.83466 | 1.004979 |
| 5250  | CYP4F8    | 13.22799 | 4.969921 | 1.091575 | 4.552981 | 5.29E-06 | 2.68E-05 | 0        | 1.094824 | 1.391463 | 33.4819  | 36.36488 | 7.034856 |
| 11035 | LOC103220 | 3.523123 | 4.96647  | 1.894605 | 2.621375 | 0.008758 | 0.021098 | 0        | 0        | 0.695731 | 4.464254 | 14.97377 | 1.004979 |
| 11317 | LOC103221 | 3.482901 | 4.964184 | 1.94343  | 2.554341 | 0.010639 | 0.024992 | 0        | 0.547412 | 0        | 2.232127 | 17.11289 | 1.004979 |
| 6127  | LOC119624 | 9.971562 | 4.963301 | 1.208896 | 4.105647 | 4.03E-05 | 0.000175 | 0        | 0.547412 | 1.391463 | 15.62489 | 34.22577 | 8.039836 |
| 8406  | LOC103236 | 6.681565 | 4.959008 | 1.511378 | 3.281116 | 0.001034 | 0.00327  | 0        | 0        | 1.391463 | 2.232127 | 21.39111 | 15.07469 |
| 8208  | TMEM213   | 6.584505 | 4.956609 | 1.482192 | 3.344106 | 0.000825 | 0.002674 | 0        | 0.547412 | 0.695731 | 24.5534  | 10.69555 | 3.014938 |
| 8965  | SLC6A14   | 6.909755 | 4.954291 | 1.584092 | 3.127528 | 0.001763 | 0.005228 | 0        | 0        | 1.391463 | 13.39276 | 25.66933 | 1.004979 |
| 8162  | POU4F2    | 6.569003 | 4.95323  | 1.473789 | 3.36088  | 0.000777 | 0.002531 | 0        | 0.547412 | 0.695731 | 22.32127 | 12.83466 | 3.014938 |
| 3428  | IL1RL2    | 19.26435 | 4.949665 | 0.836386 | 5.917921 | 3.26E-09 | 2.53E-08 | 0.542086 | 1.094824 | 2.087194 | 31.24978 | 53.47777 | 27.13445 |
| 7828  | MEP1B     | 6.516472 | 4.949317 | 1.430924 | 3.458826 | 0.000543 | 0.001843 | 0        | 0.547412 | 0.695731 | 17.85702 | 14.97377 | 5.024897 |
| 6668  | TEX15     | 10.25334 | 4.945856 | 1.278075 | 3.869771 | 0.000109 | 0.000434 | 0        | 0        | 2.087194 | 22.32127 | 32.08666 | 5.024897 |
| 7718  | LOC119621 | 6.448438 | 4.94529  | 1.417909 | 3.487736 | 0.000487 | 0.001678 | 0        | 0.547412 | 0.695731 | 11.16063 | 19.252   | 7.034856 |
| 6705  | LOC103221 | 10.23783 | 4.94341  | 1.283048 | 3.852863 | 0.000117 | 0.000463 | 0        | 0        | 2.087194 | 20.08914 | 34.22577 | 5.024897 |
| 7826  | PRSS57    | 6.687163 | 4.942005 | 1.428704 | 3.459083 | 0.000542 | 0.001841 | 0        | 0        | 1.391463 | 17.85702 | 12.83466 | 8.039836 |
| 7784  | PGLYRP4   | 6.61913  | 4.938454 | 1.4232   | 3.469964 | 0.000521 | 0.001778 | 0        | 0        | 1.391463 | 11.16063 | 17.11289 | 10.04979 |
| 8337  | LOC103241 | 6.475986 | 4.936687 | 1.495176 | 3.301744 | 0.000961 | 0.003064 | 0        | 0.547412 | 0.695731 | 8.928508 | 25.66933 | 3.014938 |
| 4819  | LOC103211 | 12.73886 | 4.929014 | 1.026678 | 4.800937 | 1.58E-06 | 8.71E-06 | 0        | 1.094824 | 1.391463 | 26.78552 | 32.08666 | 15.07469 |
| 3494  | FAM163A   | 23.06731 | 4.928172 | 0.840632 | 5.86246  | 4.56E-09 | 3.47E-08 | 0        | 0.547412 | 4.174388 | 44.64254 | 59.8951  | 29.1444  |
| 8229  | LOC119621 | 6.714711 | 4.928    | 1.476617 | 3.337357 | 0.000846 | 0.002732 | 0        | 0        | 1.391463 | 15.62489 | 19.252   | 4.019918 |
| 8230  | NPAP1     | 6.714711 | 4.928    | 1.476617 | 3.337357 | 0.000846 | 0.002732 | 0        | 0        | 1.391463 | 15.62489 | 19.252   | 4.019918 |
| 6263  | LOC103241 | 10.00576 | 4.927395 | 1.218247 | 4.044659 | 5.24E-05 | 0.000222 | 0        | 0        | 2.087194 | 20.08914 | 27.80844 | 10.04979 |
| 8099  | LOC119624 | 6.66218  | 4.92709  | 1.457557 | 3.380376 | 0.000724 | 0.002376 | 0        | 0        | 1.391463 | 11.16063 | 21.39111 | 6.029877 |



|       |           |          |          |          |          |          |          |          |          |          |          |          |          |
|-------|-----------|----------|----------|----------|----------|----------|----------|----------|----------|----------|----------|----------|----------|
| 8100  | PLCXD3    | 6.66218  | 4.92709  | 1.457557 | 3.380376 | 0.000724 | 0.002376 | 0        | 0        | 1.391463 | 11.16063 | 21.39111 | 6.029877 |
| 8269  | LOC103232 | 6.699208 | 4.92472  | 1.482024 | 3.32297  | 0.000891 | 0.002863 | 0        | 0        | 1.391463 | 13.39276 | 21.39111 | 4.019918 |
| 6584  | DNPH1     | 9.442577 | 4.923242 | 1.25981  | 3.907923 | 9.31E-05 | 0.000376 | 1.084173 | 0        | 0.695731 | 15.62489 | 34.22577 | 5.024897 |
| 7851  | CPS1      | 6.007759 | 4.921758 | 1.425438 | 3.452804 | 0.000555 | 0.001879 | 0.542086 | 0.547412 | 0        | 8.928508 | 14.97377 | 11.05477 |
| 4532  | TM45F18   | 15.80281 | 4.919794 | 0.985259 | 4.993402 | 5.93E-07 | 3.48E-06 | 0        | 1.642235 | 1.391463 | 37.94616 | 42.78221 | 11.05477 |
| 8387  | CLCA4     | 6.104228 | 4.918147 | 1.496348 | 3.286768 | 0.001013 | 0.003212 | 0        | 1.094824 | 0        | 13.39276 | 17.11289 | 5.024897 |
| 11947 | LOC103247 | 3.417638 | 4.917574 | 2.036505 | 2.414713 | 0.015748 | 0.035042 | 0        | 0        | 0.695731 | 13.39276 | 6.417332 | 0        |
| 8259  | RLN2      | 6.0672   | 4.917172 | 1.478125 | 3.326627 | 0.000879 | 0.00283  | 0        | 1.094824 | 0        | 11.16063 | 17.11289 | 7.034856 |
| 8457  | TEX33     | 6.668203 | 4.917038 | 1.505508 | 3.266033 | 0.001091 | 0.003429 | 0        | 0        | 1.391463 | 8.928508 | 25.66933 | 4.019918 |
| 10560 | LOC103247 | 3.269526 | 4.914384 | 1.799601 | 2.730818 | 0.006318 | 0.015905 | 0        | 0        | 0.695731 | 4.464254 | 6.417332 | 8.039836 |
| 6252  | LOC103227 | 9.615043 | 4.908685 | 1.211984 | 4.050122 | 5.12E-05 | 0.000218 | 0        | 0.547412 | 1.391463 | 15.62489 | 32.08666 | 8.039836 |
| 7891  | LOC119618 | 6.311947 | 4.906941 | 1.424615 | 3.444398 | 0.000572 | 0.001928 | 0        | 0.547412 | 0.695731 | 15.62489 | 14.97377 | 6.029877 |
| 10566 | CATSPERB  | 3.318862 | 4.90503  | 1.797105 | 2.729407 | 0.006345 | 0.015964 | 0        | 0.547412 | 0        | 8.928508 | 6.417332 | 4.019918 |
| 4636  | DPPA4     | 15.65081 | 4.904109 | 0.995588 | 4.925844 | 8.40E-07 | 4.82E-06 | 0        | 1.642235 | 1.391463 | 40.17829 | 40.6431  | 10.04979 |
| 10825 | LOC103218 | 3.35589  | 4.903643 | 1.839813 | 2.665295 | 0.007692 | 0.018887 | 0        | 0.547412 | 0        | 11.16063 | 6.417332 | 2.009959 |
| 10826 | LOC103218 | 3.35589  | 4.903643 | 1.839813 | 2.665295 | 0.007692 | 0.018887 | 0        | 0.547412 | 0        | 11.16063 | 6.417332 | 2.009959 |
| 10827 | LOC103247 | 3.35589  | 4.903643 | 1.839813 | 2.665295 | 0.007692 | 0.018887 | 0        | 0.547412 | 0        | 11.16063 | 6.417332 | 2.009959 |
| 7892  | LOC103234 | 6.44561  | 4.903504 | 1.423635 | 3.444355 | 0.000572 | 0.001928 | 0        | 0        | 1.391463 | 13.39276 | 12.83466 | 11.05477 |
| 10807 | LOC103218 | 3.38061  | 4.903419 | 1.83694  | 2.669341 | 0.0076   | 0.018694 | 0        | 0        | 0.695731 | 11.16063 | 6.417332 | 2.009959 |
| 10808 | SPATA12   | 3.38061  | 4.903419 | 1.83694  | 2.669341 | 0.0076   | 0.018694 | 0        | 0        | 0.695731 | 11.16063 | 6.417332 | 2.009959 |
| 12050 | MEPE      | 3.346409 | 4.90026  | 2.044105 | 2.397264 | 0.016518 | 0.036442 | 0        | 0.547412 | 0        | 6.696381 | 12.83466 | 0        |
| 10589 | CXCR5     | 3.303359 | 4.899752 | 1.797996 | 2.725118 | 0.006428 | 0.016138 | 0        | 0.547412 | 0        | 6.696381 | 8.556443 | 4.019918 |
| 6400  | FOLR2     | 9.838265 | 4.898168 | 1.230728 | 3.979895 | 6.89E-05 | 0.000286 | 0        | 0        | 2.087194 | 20.08914 | 27.80844 | 9.044815 |
| 10805 | LOC103247 | 3.339499 | 4.897738 | 1.834698 | 2.669506 | 0.007596 | 0.01869  | 0.542086 | 0        | 0        | 8.928508 | 8.556443 | 2.009959 |
| 10773 | CBLIF     | 3.365107 | 4.897508 | 1.831704 | 2.673744 | 0.007501 | 0.018509 | 0        | 0        | 0.695731 | 8.928508 | 8.556443 | 2.009959 |
| 10774 | LOC103218 | 3.365107 | 4.897508 | 1.831704 | 2.673744 | 0.007501 | 0.018509 | 0        | 0        | 0.695731 | 8.928508 | 8.556443 | 2.009959 |
| 5409  | CCDC166   | 13.06128 | 4.896582 | 1.09831  | 4.458286 | 8.26E-06 | 4.06E-05 | 0        | 0        | 2.782925 | 17.85702 | 40.6431  | 17.08465 |
| 6104  | SFTPB     | 9.243285 | 4.896106 | 1.188576 | 4.119304 | 3.80E-05 | 0.000166 | 0        | 1.094824 | 0.695731 | 20.08914 | 23.53022 | 10.04979 |
| 8020  | LOC103237 | 6.414605 | 4.895836 | 1.437194 | 3.406525 | 0.000658 | 0.002181 | 0        | 0        | 1.391463 | 8.928508 | 17.11289 | 11.05477 |
| 12174 | PROKR2    | 3.355627 | 4.895506 | 2.064653 | 2.371103 | 0.017735 | 0.038729 | 0        | 0        | 0.695731 | 4.464254 | 14.97377 | 0        |
| 10689 | LOC119627 | 3.287856 | 4.895161 | 1.816409 | 2.694967 | 0.00704  | 0.017508 | 0        | 0.547412 | 0        | 4.464254 | 10.69555 | 4.019918 |
| 10669 | FAM83F    | 3.312576 | 4.895045 | 1.813444 | 2.699309 | 0.006948 | 0.017312 | 0        | 0        | 0.695731 | 4.464254 | 10.69555 | 4.019918 |
| 10670 | LOC119618 | 3.312576 | 4.895045 | 1.813444 | 2.699309 | 0.006948 | 0.017312 | 0        | 0        | 0.695731 | 4.464254 | 10.69555 | 4.019918 |
| 10849 | LOC103218 | 3.349604 | 4.892527 | 1.838743 | 2.660799 | 0.007796 | 0.019101 | 0        | 0        | 0.695731 | 6.696381 | 10.69555 | 2.009959 |
| 10850 | LOC119627 | 3.349604 | 4.892527 | 1.838743 | 2.660799 | 0.007796 | 0.019101 | 0        | 0        | 0.695731 | 6.696381 | 10.69555 | 2.009959 |
| 10990 | LOC103247 | 3.297073 | 4.891203 | 1.858728 | 2.631479 | 0.008501 | 0.020565 | 0        | 0        | 0.695731 | 2.232127 | 12.83466 | 4.019918 |
| 6117  | PGLYRP3   | 9.488032 | 4.890259 | 1.189522 | 4.111112 | 3.94E-05 | 0.000171 | 0        | 0.547412 | 1.391463 | 24.5534  | 21.39111 | 9.044815 |
| 11861 | LOC103237 | 3.281571 | 4.889268 | 2.008707 | 2.434037 | 0.014931 | 0.033467 | 0        | 0        | 0.695731 | 0        | 14.97377 | 4.019918 |
| 6599  | TAF2      | 9.754729 | 4.889007 | 1.25248  | 3.90346  | 9.48E-05 | 0.000382 | 0        | 0        | 2.087194 | 11.16063 | 34.22577 | 11.05477 |
| 3528  | SGPP2     | 18.56744 | 4.886409 | 0.83843  | 5.828044 | 5.61E-09 | 4.23E-08 | 0.542086 | 0.547412 | 2.782925 | 42.41041 | 29.94755 | 35.17428 |
| 4843  | LOC103227 | 16.32693 | 4.882504 | 1.019981 | 4.78686  | 1.69E-06 | 9.30E-06 | 0        | 0        | 3.478657 | 33.4819  | 44.92132 | 16.07967 |
| 13813 | TCF24     | 1.566022 | 4.88084  | 2.386368 | 2.045301 | 0.040825 | 0.078572 | 0        | 0        | 0        | 2.232127 | 2.139111 | 5.024897 |
| 6586  | GJA8      | 9.484575 | 4.878992 | 1.249046 | 3.906174 | 9.38E-05 | 0.000379 | 0        | 0.547412 | 1.391463 | 17.85702 | 32.08666 | 5.024897 |
| 8669  | CKM       | 5.952234 | 4.877767 | 1.518839 | 3.21151  | 0.00132  | 0.004049 | 0        | 1.094824 | 0        | 15.62489 | 14.97377 | 4.019918 |
| 13663 | FGG       | 1.603051 | 4.877359 | 2.349783 | 2.075664 | 0.037925 | 0.073782 | 0        | 0        | 0        | 4.464254 | 2.139111 | 3.014938 |
| 13665 | LOC103218 | 1.603051 | 4.877359 | 2.349783 | 2.075664 | 0.037925 | 0.073782 | 0        | 0        | 0        | 4.464254 | 2.139111 | 3.014938 |
| 13900 | LOC119624 | 1.640079 | 4.874752 | 2.401963 | 2.029486 | 0.042409 | 0.08107  | 0        | 0        | 0        | 6.696381 | 2.139111 | 1.004979 |
| 13901 | LOC103235 | 1.640079 | 4.874752 | 2.401963 | 2.029486 | 0.042409 | 0.08107  | 0        | 0        | 0        | 6.696381 | 2.139111 | 1.004979 |
| 13902 | CXCR6     | 1.640079 | 4.874752 | 2.401963 | 2.029486 | 0.042409 | 0.08107  | 0        | 0        | 0        | 6.696381 | 2.139111 | 1.004979 |
| 13903 | LOC119618 | 1.640079 | 4.874752 | 2.401963 | 2.029486 | 0.042409 | 0.08107  | 0        | 0        | 0        | 6.696381 | 2.139111 | 1.004979 |
| 13904 | PRSS38    | 1.640079 | 4.874752 | 2.401963 | 2.029486 | 0.042409 | 0.08107  | 0        | 0        | 0        | 6.696381 | 2.139111 | 1.004979 |
| 13905 | LOC119620 | 1.640079 | 4.874752 | 2.401963 | 2.029486 | 0.042409 | 0.08107  | 0        | 0        | 0        | 6.696381 | 2.139111 | 1.004979 |
| 13906 | LOC119627 | 1.640079 | 4.874752 | 2.401963 | 2.029486 | 0.042409 | 0.08107  | 0        | 0        | 0        | 6.696381 | 2.139111 | 1.004979 |
| 13907 | LOC119627 | 1.640079 | 4.874752 | 2.401963 | 2.029486 | 0.042409 | 0.08107  | 0        | 0        | 0        | 6.696381 | 2.139111 | 1.004979 |
| 8619  | EVX1      | 6.463678 | 4.87396  | 1.511717 | 3.224122 | 0.001264 | 0.003898 | 0        | 0        | 1.391463 | 6.696381 | 25.66933 | 5.024897 |
| 15052 | LOC119627 | 1.528994 | 4.868089 | 1.823973 | 2.068156 | 0.120378 | 0.000762 | 0        | 0        | 0        | 0        | 2.139111 | 7.034856 |
| 7008  | LOC119627 | 9.77583  | 4.867919 | 1.305091 | 3.729946 | 0.000192 | 0.000727 | 0        | 0        | 2.087194 | 29.01765 | 23.53022 | 4.019918 |
| 13715 | LOC119620 | 1.587548 | 4.866583 | 2.355373 | 2.066163 | 0.038813 | 0.075197 | 0        | 0        | 0        | 2.232127 | 4.278221 | 3.014938 |
| 13717 | LOC119618 | 1.587548 | 4.866583 | 2.355373 | 2.066163 | 0.038813 | 0.075197 | 0        | 0        | 0        | 2.232127 | 4.278221 | 3.014938 |
| 13718 | LOC103225 | 1.587548 | 4.866583 | 2.355373 | 2.066163 | 0.038813 | 0.075197 | 0        | 0        | 0        | 2.232127 | 4.278221 | 3.014938 |
| 13719 | LOC103225 | 1.587548 | 4.866583 | 2.355373 | 2.066163 | 0.038813 | 0.075197 | 0        | 0        | 0        | 2.232127 | 4.278221 | 3.014938 |
| 13720 | HS3ST2    | 1.587548 | 4.866583 | 2.355373 | 2.066163 | 0.038813 | 0.075197 | 0        | 0        | 0        | 2.232127 | 4.278221 | 3.014938 |
| 13722 | LOC103245 | 1.587548 | 4.866583 | 2.355373 | 2.066163 | 0.038813 | 0.075197 | 0        | 0        | 0        | 2.232127 | 4.278221 | 3.014938 |
| 13723 | LOC103235 | 1.587548 | 4.866583 | 2.355373 | 2.066163 | 0.038813 | 0.075197 | 0        | 0        | 0        | 2.232127 | 4.278221 | 3.014938 |
| 6625  | LOC103246 | 9.655266 | 4.865664 | 1.250402 | 3.89128  | 9.97E-05 | 0.0004   | 0        | 0        | 2.087194 | 17.85702 | 29.94755 | 8.039836 |
| 8142  | LOC103226 | 6.159953 | 4.865161 | 1.445246 | 3.366321 | 0.000762 | 0.002487 | 0        | 0.547412 | 0.695731 | 17.85702 | 12.83466 | 5.024897 |
| 8143  | AICDA     | 6.159953 | 4.865161 | 1.445246 | 3.366321 | 0.000762 | 0.002487 | 0        | 0.547412 | 0.695731 | 17.85702 | 12.83466 | 5.024897 |
| 6628  | LOC103218 | 9.118839 | 4.864973 | 1.250894 | 3.889198 | 0.000101 | 0.000403 | 0        | 1.094824 | 0.695731 | 20.08914 | 27.80844 | 5.024897 |
| 14879 | LOC119618 | 1.55052  | 4.863133 | 2.617493 | 1.857936 | 0.063178 | 0.112845 | 0        | 0        | 0        | 0        | 4.278221 | 5.024897 |
| 13820 | LOC119620 | 1.624576 | 4.862547 | 2.378649 | 2.044248 | 0.040929 | 0.078671 | 0        | 0        | 0        | 4.464254 | 4.278221 | 1.004979 |
| 13822 | LHFPL4    | 1.624576 | 4.862547 | 2.378649 | 2.044248 | 0.040929 | 0.078671 | 0        | 0        | 0        | 4.464254 | 4.278221 | 1.004979 |
| 13823 | LOC119627 | 1.624576 | 4.862547 | 2.378649 | 2.044248 | 0.040929 | 0.078671 | 0        | 0        | 0        | 4.464254 | 4.278221 | 1.004979 |
| 13824 | LOC119628 | 1.624576 | 4.862547 | 2.378649 | 2.044248 | 0.040929 | 0.078671 | 0        | 0        | 0        | 4.464254 | 4.278221 | 1.004979 |
| 13826 | LOC119618 | 1.624576 | 4.862547 | 2.378649 | 2.044248 | 0.040929 | 0.078671 | 0        | 0        | 0        | 4.464254 | 4.278221 | 1.004979 |



|       |           |          |          |          |          |           |           |          |          |          |          |          |          |
|-------|-----------|----------|----------|----------|----------|-----------|-----------|----------|----------|----------|----------|----------|----------|
| 13827 | LOC103235 | 1.624576 | 4.862547 | 2.378649 | 2.044248 | 0.040929  | 0.078671  | 0        | 0        | 0        | 4.464254 | 4.278221 | 1.004979 |
| 13828 | LOC119625 | 1.624576 | 4.862547 | 2.378649 | 2.044248 | 0.040929  | 0.078671  | 0        | 0        | 0        | 4.464254 | 4.278221 | 1.004979 |
| 13830 | LOC103235 | 1.624576 | 4.862547 | 2.378649 | 2.044248 | 0.040929  | 0.078671  | 0        | 0        | 0        | 4.464254 | 4.278221 | 1.004979 |
| 13831 | LOC119625 | 1.624576 | 4.862547 | 2.378649 | 2.044248 | 0.040929  | 0.078671  | 0        | 0        | 0        | 4.464254 | 4.278221 | 1.004979 |
| 8588  | RHCG      | 5.985971 | 4.85918  | 1.50299  | 3.23301  | 0.001225  | 0.003792  | 0.542086 | 0        | 0.695731 | 2.232127 | 21.39111 | 11.05477 |
| 8082  | LBX2      | 6.278114 | 4.858985 | 1.434384 | 3.387505 | 0.000705  | 0.00232   | 0        | 0        | 1.391463 | 13.39276 | 12.83466 | 10.04979 |
| 8320  | RFX8      | 6.023887 | 4.856969 | 1.468232 | 3.308039 | 0.00094   | 0.003002  | 0        | 0.547412 | 0.695731 | 4.464254 | 21.39111 | 9.044815 |
| 14878 | GZMK      | 1.572045 | 4.855422 | 2.613323 | 1.85795  | 0.063176  | 0.112845  | 0        | 0        | 0        | 0        | 6.417332 | 3.014938 |
| 14880 | LOC103215 | 1.572045 | 4.855422 | 2.613323 | 1.85795  | 0.063176  | 0.112845  | 0        | 0        | 0        | 0        | 6.417332 | 3.014938 |
| 14881 | LOC119618 | 1.572045 | 4.855422 | 2.613323 | 1.85795  | 0.063176  | 0.112845  | 0        | 0        | 0        | 0        | 6.417332 | 3.014938 |
| 14884 | LOC119618 | 1.572045 | 4.855422 | 2.613323 | 1.85795  | 0.063176  | 0.112845  | 0        | 0        | 0        | 0        | 6.417332 | 3.014938 |
| 20    | C3        | 22604.7  | 4.853395 | 0.126933 | 38.23588 | 0         | 0         | 1350.879 | 1811.933 | 1371.287 | 42519.79 | 40688.02 | 47886.27 |
| 8273  | CDH19     | 6.35217  | 4.853366 | 1.461166 | 3.32157  | 0.000895  | 0.002876  | 0        | 0        | 1.391463 | 17.85702 | 12.83466 | 6.029877 |
| 13992 | LOC103215 | 1.609073 | 4.852649 | 2.412805 | 2.011207 | 0.044304  | 0.084069  | 0        | 0        | 0        | 2.232127 | 6.417332 | 1.004979 |
| 13993 | LOC103215 | 1.609073 | 4.852649 | 2.412805 | 2.011207 | 0.044304  | 0.084069  | 0        | 0        | 0        | 2.232127 | 6.417332 | 1.004979 |
| 13995 | LOC119625 | 1.609073 | 4.852649 | 2.412805 | 2.011207 | 0.044304  | 0.084069  | 0        | 0        | 0        | 2.232127 | 6.417332 | 1.004979 |
| 13996 | LOC103225 | 1.609073 | 4.852649 | 2.412805 | 2.011207 | 0.044304  | 0.084069  | 0        | 0        | 0        | 2.232127 | 6.417332 | 1.004979 |
| 13997 | LOC119625 | 1.609073 | 4.852649 | 2.412805 | 2.011207 | 0.044304  | 0.084069  | 0        | 0        | 0        | 2.232127 | 6.417332 | 1.004979 |
| 13998 | LOC103235 | 1.609073 | 4.852649 | 2.412805 | 2.011207 | 0.044304  | 0.084069  | 0        | 0        | 0        | 2.232127 | 6.417332 | 1.004979 |
| 13999 | LOC119625 | 1.609073 | 4.852649 | 2.412805 | 2.011207 | 0.044304  | 0.084069  | 0        | 0        | 0        | 2.232127 | 6.417332 | 1.004979 |
| 14001 | LOC103215 | 1.609073 | 4.852649 | 2.412805 | 2.011207 | 0.044304  | 0.084069  | 0        | 0        | 0        | 2.232127 | 6.417332 | 1.004979 |
| 14003 | LOC119615 | 1.609073 | 4.852649 | 2.412805 | 2.011207 | 0.044304  | 0.084069  | 0        | 0        | 0        | 2.232127 | 6.417332 | 1.004979 |
| 14004 | LOC103235 | 1.609073 | 4.852649 | 2.412805 | 2.011207 | 0.044304  | 0.084069  | 0        | 0        | 0        | 2.232127 | 6.417332 | 1.004979 |
| 14005 | LOC103235 | 1.609073 | 4.852649 | 2.412805 | 2.011207 | 0.044304  | 0.084069  | 0        | 0        | 0        | 2.232127 | 6.417332 | 1.004979 |
| 14006 | TEKT1     | 1.609073 | 4.852649 | 2.412805 | 2.011207 | 0.044304  | 0.084069  | 0        | 0        | 0        | 2.232127 | 6.417332 | 1.004979 |
| 14007 | EDDM3B    | 1.609073 | 4.852649 | 2.412805 | 2.011207 | 0.044304  | 0.084069  | 0        | 0        | 0        | 2.232127 | 6.417332 | 1.004979 |
| 14008 | LOC103235 | 1.609073 | 4.852649 | 2.412805 | 2.011207 | 0.044304  | 0.084069  | 0        | 0        | 0        | 2.232127 | 6.417332 | 1.004979 |
| 14009 | LOC119625 | 1.609073 | 4.852649 | 2.412805 | 2.011207 | 0.044304  | 0.084069  | 0        | 0        | 0        | 2.232127 | 6.417332 | 1.004979 |
| 14010 | CACNG1    | 1.609073 | 4.852649 | 2.412805 | 2.011207 | 0.044304  | 0.084069  | 0        | 0        | 0        | 2.232127 | 6.417332 | 1.004979 |
| 8590  | SCRG1     | 6.404701 | 4.852604 | 1.501272 | 3.232329 | 0.001228  | 0.0038    | 0        | 0        | 1.391463 | 22.32127 | 10.69555 | 4.019918 |
| 2595  | LOC103235 | 27.00619 | 4.85123  | 0.694234 | 6.987884 | 2.79E-12  | 2.86E-11  | 1.084173 | 1.642235 | 2.782925 | 64.73168 | 55.61688 | 36.17926 |
| 15124 | LOC119625 | 1.59357  | 4.848859 | 2.679551 | 1.809579 | 0.070361  | 0.123656  | 0        | 0        | 0        | 0        | 8.556443 | 1.004979 |
| 15125 | LOC119615 | 1.59357  | 4.848859 | 2.679551 | 1.809579 | 0.070361  | 0.123656  | 0        | 0        | 0        | 0        | 8.556443 | 1.004979 |
| 15126 | LOC103215 | 1.59357  | 4.848859 | 2.679551 | 1.809579 | 0.070361  | 0.123656  | 0        | 0        | 0        | 0        | 8.556443 | 1.004979 |
| 15127 | LOC103235 | 1.59357  | 4.848859 | 2.679551 | 1.809579 | 0.070361  | 0.123656  | 0        | 0        | 0        | 0        | 8.556443 | 1.004979 |
| 2210  | LOC103235 | 32.66754 | 4.845532 | 0.638981 | 7.583215 | 3.37E-14  | 4.06E-13  | 1.626259 | 1.642235 | 3.478657 | 87.05295 | 44.92132 | 57.28383 |
| 11974 | LOC119625 | 3.185565 | 4.845444 | 2.009556 | 2.411201 | 0.0159    | 0.035302  | 0        | 0        | 0.695731 | 13.39276 | 0        | 5.024897 |
| 6715  | LOC119625 | 9.518775 | 4.840228 | 1.257268 | 3.849798 | 0.000118  | 0.000468  | 0        | 0        | 2.087194 | 22.32127 | 25.66933 | 7.034856 |
| 5099  | THEG      | 11.97932 | 4.839238 | 1.045368 | 4.629218 | 3.67E-06  | 1.91E-05  | 0        | 1.094824 | 1.391463 | 20.08914 | 34.22577 | 15.07469 |
| 11763 | NLRP14    | 3.218511 | 4.838596 | 1.970641 | 2.455341 | 0.014075  | 0.031803  | 0.542086 | 0        | 0        | 15.62489 | 2.139111 | 1.004979 |
| 4284  | KCNQ3     | 18.43822 | 4.836869 | 0.936468 | 5.165015 | 2.40E-07  | 1.49E-06  | 0.542086 | 0.547412 | 2.782925 | 37.94616 | 57.75599 | 11.05477 |
| 11120 | MUC15     | 3.170062 | 4.836709 | 1.861871 | 2.597769 | 0.009383  | 0.022433  | 0        | 0        | 0.695731 | 11.16063 | 2.139111 | 5.024897 |
| 8024  | SBK3      | 5.85896  | 4.834685 | 1.420143 | 3.404364 | 0.000663  | 0.002197  | 0.542086 | 0        | 0.695731 | 11.16063 | 10.69555 | 12.05975 |
| 5679  | FAM180A   | 12.62683 | 4.83452  | 1.114841 | 4.33651  | 1.45E-05  | 6.78E-05  | 0        | 0        | 2.782925 | 24.5534  | 36.36488 | 12.05975 |
| 7418  | TMEM211   | 8.856551 | 4.831407 | 1.344782 | 3.592705 | 0.000327  | 0.001173  | 1.084173 | 0        | 0.695731 | 6.696381 | 40.6431  | 4.019918 |
| 10923 | LOC103225 | 3.128952 | 4.83028  | 1.825134 | 2.646535 | 0.008132  | 0.019792  | 0.542086 | 0        | 0        | 8.928508 | 4.278221 | 5.024897 |
| 10895 | LOC103235 | 3.102029 | 4.829848 | 1.82169  | 2.651301 | 0.008018  | 0.019565  | 0        | 0        | 0.695731 | 4.464254 | 6.417332 | 7.034856 |
| 5113  | TH        | 15.83994 | 4.829673 | 1.044965 | 4.62185  | 3.80E-06  | 1.98E-05  | 0        | 0        | 3.478657 | 35.71403 | 42.78221 | 13.06473 |
| 11542 | LOC103225 | 3.203896 | 4.829333 | 1.927675 | 2.505263 | 0.012236  | 0.028181  | 0        | 0.547412 | 0        | 13.39276 | 4.278221 | 1.004979 |
| 3110  | PVRIG     | 23.87981 | 4.828727 | 0.770242 | 6.269102 | 3.63E-10  | 3.10E-09  | 0.542086 | 1.642235 | 2.782925 | 46.87467 | 66.31243 | 25.12449 |
| 11062 | LOC119618 | 3.191588 | 4.826523 | 1.847273 | 2.612783 | 0.008981  | 0.021581  | 0        | 0        | 0.695731 | 11.16063 | 4.278221 | 3.014938 |
| 34    | PLEK      | 890.2486 | 4.825235 | 0.146748 | 32.88116 | 4.09E-237 | 3.20E-234 | 52.04029 | 64.59459 | 66.09448 | 1736.595 | 1651.393 | 1770.774 |
| 10836 | LOC103235 | 3.139057 | 4.824457 | 1.811641 | 2.663031 | 0.007744  | 0.018997  | 0        | 0        | 0.695731 | 6.696381 | 6.417332 | 5.024897 |
| 10837 | LOC103235 | 3.139057 | 4.824457 | 1.811641 | 2.663031 | 0.007744  | 0.018997  | 0        | 0        | 0.695731 | 6.696381 | 6.417332 | 5.024897 |
| 6381  | CDH15     | 9.175618 | 4.823828 | 1.209987 | 3.986676 | 6.70E-05  | 0.000279  | 0        | 0        | 2.087194 | 15.62489 | 19.252   | 18.08963 |
| 11455 | LOC103235 | 3.187505 | 4.821868 | 1.909103 | 2.525724 | 0.011546  | 0.026796  | 0.542086 | 0        | 0        | 11.16063 | 6.417332 | 1.004979 |
| 4100  | NKX6-3    | 21.75488 | 4.821071 | 0.910323 | 5.296003 | 1.18E-07  | 7.67E-07  | 0        | 0.547412 | 4.174388 | 42.41041 | 66.31243 | 17.08465 |
| 12036 | CLIC3     | 3.049498 | 4.820207 | 2.008583 | 2.399805 | 0.016404  | 0.03623   | 0        | 0        | 0.695731 | 0        | 8.556443 | 9.044815 |
| 12037 | LOC119625 | 3.049498 | 4.820207 | 2.008583 | 2.399805 | 0.016404  | 0.03623   | 0        | 0        | 0.695731 | 0        | 8.556443 | 9.044815 |
| 5613  | OPTC      | 12.48431 | 4.819984 | 1.103949 | 4.366128 | 1.26E-05  | 5.99E-05  | 0        | 0        | 2.782925 | 31.24978 | 27.80844 | 13.06473 |
| 430   | ZNF227    | 130.4179 | 4.816124 | 0.314423 | 15.31733 | 5.86E-53  | 3.62E-51  | 10.84173 | 8.758589 | 6.957314 | 238.8376 | 258.8324 | 258.2797 |
| 11438 | RFPL4A    | 3.172003 | 4.815508 | 1.904142 | 2.528964 | 0.01144   | 0.02659   | 0.542086 | 0        | 0        | 8.928508 | 8.556443 | 1.004979 |
| 11437 | IL9       | 3.17289  | 4.815498 | 1.904027 | 2.529113 | 0.011435  | 0.026581  | 0        | 0.547412 | 0        | 8.928508 | 8.556443 | 1.004979 |
| 11030 | NCR1      | 3.135862 | 4.814416 | 1.835245 | 2.623309 | 0.008708  | 0.020988  | 0        | 0.547412 | 0        | 6.696381 | 8.556443 | 3.014938 |
| 11228 | LOC103225 | 3.083332 | 4.81414  | 1.869779 | 2.574711 | 0.010032  | 0.023752  | 0        | 0.547412 | 0        | 2.232127 | 10.69555 | 5.024897 |
| 11229 | LOC103225 | 3.083332 | 4.81414  | 1.869779 | 2.574711 | 0.010032  | 0.023752  | 0        | 0.547412 | 0        | 2.232127 | 10.69555 | 5.024897 |
| 7220  | KLK9      | 9.419312 | 4.810617 | 1.313958 | 3.661164 | 0.000251  | 0.000924  | 0        | 0        | 2.087194 | 29.01765 | 21.39111 | 4.019918 |
| 5350  | SLC7A14   | 12.1091  | 4.810415 | 1.071543 | 4.48924  | 7.15E-06  | 3.55E-05  | 0        | 0.547412 | 2.087194 | 29.01765 | 29.94755 | 11.05477 |
| 11479 | ANO9      | 3.182108 | 4.809835 | 1.907868 | 2.521052 | 0.0117    | 0.027095  | 0        | 0        | 0.695731 | 6.696381 | 10.69555 | 1.004979 |
| 11480 | LOC103245 | 3.182108 | 4.809835 | 1.907868 | 2.521052 | 0.0117    | 0.027095  | 0        | 0        | 0.695731 | 6.696381 | 10.69555 | 1.004979 |
| 11135 | PPP1R17   | 3.12036  | 4.809671 | 1.853611 | 2.594757 | 0.009466  | 0.022596  | 0        | 0.547412 | 0        | 4.464254 | 10.69555 | 3.014938 |
| 11137 | MC2R      | 3.12036  | 4.809671 | 1.853611 | 2.594757 | 0.009466  | 0.022596  | 0        | 0.547412 | 0        | 4.464254 | 10.69555 | 3.014938 |
| 11118 | LOC119625 | 3.14508  | 4.809506 | 1.850393 | 2.599182 | 0.009345  | 0.022346  | 0        | 0        | 0.695731 | 4.464254 | 10.69555 | 3.014938 |
| 8353  | CACNG3    | 6.132143 | 4.807133 | 1.45831  | 3.296374 | 0.000979  | 0.003117  | 0        | 0        | 1.391463 | 13.39276 | 14.97377 | 7.034856 |



|       |           |          |          |          |          |           |           |          |          |          |          |          |          |
|-------|-----------|----------|----------|----------|----------|-----------|-----------|----------|----------|----------|----------|----------|----------|
| 11424 | MMP26     | 3.104857 | 4.805965 | 1.899047 | 2.530725 | 0.011383  | 0.026489  | 0        | 0.547412 | 0        | 2.232127 | 12.83466 | 3.014938 |
| 11403 | STX19     | 3.129577 | 4.805824 | 1.895733 | 2.535075 | 0.011242  | 0.026206  | 0        | 0        | 0.695731 | 2.232127 | 12.83466 | 3.014938 |
| 11404 | LOC119615 | 3.129577 | 4.805824 | 1.895733 | 2.535075 | 0.011242  | 0.026206  | 0        | 0        | 0.695731 | 2.232127 | 12.83466 | 3.014938 |
| 11405 | LOC119620 | 3.129577 | 4.805824 | 1.895733 | 2.535075 | 0.011242  | 0.026206  | 0        | 0        | 0.695731 | 2.232127 | 12.83466 | 3.014938 |
| 11632 | STEAP4    | 3.141885 | 4.805642 | 1.932295 | 2.487013 | 0.012882  | 0.029443  | 0        | 0.547412 | 0        | 4.464254 | 12.83466 | 1.004979 |
| 11612 | LY9       | 3.166605 | 4.80541  | 1.929039 | 2.49109  | 0.012735  | 0.029151  | 0        | 0        | 0.695731 | 4.464254 | 12.83466 | 1.004979 |
| 11613 | SLCSA4    | 3.166605 | 4.80541  | 1.929039 | 2.49109  | 0.012735  | 0.029151  | 0        | 0        | 0.695731 | 4.464254 | 12.83466 | 1.004979 |
| 8374  | TNFAIP8L2 | 6.079612 | 4.805222 | 1.460125 | 3.290967 | 0.000998  | 0.003169  | 0        | 0        | 1.391463 | 8.928508 | 17.11289 | 9.044815 |
| 8375  | LOC103227 | 6.079612 | 4.805222 | 1.460125 | 3.290967 | 0.000998  | 0.003169  | 0        | 0        | 1.391463 | 8.928508 | 17.11289 | 9.044815 |
| 12304 | SPAM1     | 3.114074 | 4.805055 | 2.050561 | 2.343288 | 0.019115  | 0.041297  | 0        | 0        | 0.695731 | 0        | 14.97377 | 3.014938 |
| 12305 | LOC103216 | 3.114074 | 4.805055 | 2.050561 | 2.343288 | 0.019115  | 0.041297  | 0        | 0        | 0.695731 | 0        | 14.97377 | 3.014938 |
| 4727  | LOC119624 | 18.71246 | 4.804814 | 0.987536 | 4.865458 | 1.14E-06  | 6.42E-06  | 0        | 0        | 4.174388 | 31.24978 | 57.75599 | 19.09461 |
| 4201  | GRM1      | 21.50296 | 4.804651 | 0.921036 | 5.216575 | 1.82E-07  | 1.15E-06  | 0.542086 | 0        | 4.174388 | 33.4819  | 72.72976 | 18.08963 |
| 4984  | LOC103227 | 11.42367 | 4.802588 | 1.022502 | 4.696899 | 2.64E-06  | 1.41E-05  | 0.542086 | 1.094824 | 0.695731 | 22.32127 | 27.80844 | 16.07967 |
| 6337  | LOC103227 | 8.843453 | 4.797906 | 1.196386 | 4.010332 | 6.06E-05  | 0.000254  | 0        | 0.547412 | 1.391463 | 13.39276 | 25.66933 | 12.05975 |
| 2797  | TP63      | 39.462   | 4.796422 | 0.715855 | 6.700268 | 2.08E-11  | 1.98E-10  | 0.542086 | 1.094824 | 6.957314 | 87.05295 | 106.9555 | 34.1693  |
| 8482  | LOC103238 | 5.738859 | 4.791718 | 1.470131 | 3.259382 | 0.001117  | 0.003499  | 0        | 0.547412 | 0.695731 | 17.85702 | 4.278221 | 11.05477 |
| 9025  | ZNF560    | 5.631856 | 4.788746 | 1.540413 | 3.108742 | 0.001879  | 0.005535  | 0.542086 | 0.547412 | 0        | 17.85702 | 12.83466 | 2.009959 |
| 184   | TSPAN8    | 524.9707 | 4.784266 | 0.230926 | 20.71773 | 2.40E-95  | 3.46E-93  | 32.52518 | 22.9913  | 56.35424 | 1058.028 | 983.9909 | 995.9347 |
| 8829  | BCL2L15   | 5.543185 | 4.781763 | 1.511782 | 3.162997 | 0.001562  | 0.004702  | 0        | 1.094824 | 0        | 11.16063 | 14.97377 | 6.029877 |
| 8293  | LOC119624 | 5.766407 | 4.778123 | 1.441333 | 3.315073 | 0.000916  | 0.002937  | 0        | 0.547412 | 0.695731 | 15.62489 | 10.69555 | 7.034856 |
| 8430  | LOC103245 | 5.787932 | 4.772652 | 1.458027 | 3.273364 | 0.001063  | 0.003352  | 0        | 0.547412 | 0.695731 | 15.62489 | 12.83466 | 5.024897 |
| 8414  | LOC103245 | 5.921595 | 4.770742 | 1.455358 | 3.278053 | 0.001045  | 0.003303  | 0        | 0        | 1.391463 | 13.39276 | 10.69555 | 10.04979 |
| 9257  | LOC103227 | 5.830983 | 4.769064 | 1.568058 | 3.041381 | 0.002355  | 0.006763  | 0        | 0.547412 | 0.695731 | 15.62489 | 17.11289 | 1.004979 |
| 32    | PDZK1IP1  | 1861.137 | 4.768997 | 0.142706 | 33.41841 | 7.41E-245 | 6.15E-242 | 145.8212 | 105.6505 | 144.7121 | 3332.566 | 3482.472 | 3955.599 |
| 9299  | CBLL2     | 5.81548  | 4.765863 | 1.571609 | 3.032473 | 0.002426  | 0.006935  | 0        | 0.547412 | 0.695731 | 13.39276 | 19.252   | 1.004979 |
| 8466  | CUNH5orf5 | 5.943121 | 4.765403 | 1.46033  | 3.263237 | 0.001101  | 0.003459  | 0        | 0        | 1.391463 | 13.39276 | 12.83466 | 8.039836 |
| 8507  | LOC119625 | 5.89059  | 4.763491 | 1.463407 | 3.255068 | 0.001134  | 0.003543  | 0        | 0        | 1.391463 | 8.928508 | 14.97377 | 10.04979 |
| 12629 | LOC119620 | 3.055097 | 4.761406 | 2.092512 | 2.27545  | 0.022879  | 0.048162  | 0        | 0        | 0.695731 | 15.62489 | 0        | 2.009959 |
| 9607  | SLC16A8   | 5.768084 | 4.760058 | 1.608188 | 2.959889 | 0.003077  | 0.008516  | 0.542086 | 0        | 0.695731 | 6.696381 | 25.66933 | 1.004979 |
| 6660  | LOC103240 | 8.914681 | 4.759909 | 1.228934 | 3.873202 | 0.000107  | 0.000429  | 0        | 0        | 2.087194 | 20.08914 | 19.252   | 12.05975 |
| 9254  | LOC103215 | 5.694028 | 4.757957 | 1.564059 | 3.042056 | 0.00235   | 0.00675   | 0.542086 | 0        | 0.695731 | 2.232127 | 25.66933 | 5.024897 |
| 8657  | LOC103215 | 5.875087 | 4.75788  | 1.480264 | 3.214211 | 0.001308  | 0.004017  | 0        | 0        | 1.391463 | 6.696381 | 17.11289 | 10.04979 |
| 5630  | FOXL2     | 15.21646 | 4.757773 | 1.091683 | 4.3582   | 1.31E-05  | 6.19E-05  | 0        | 0        | 3.478657 | 42.41041 | 36.36488 | 9.044815 |
| 7307  | MAPK4     | 8.77756  | 4.755997 | 1.309132 | 3.63294  | 0.00028   | 0.001019  | 0        | 0.547412 | 1.391463 | 15.62489 | 32.08666 | 3.014938 |
| 5521  | LOC119618 | 15.10192 | 4.751448 | 1.078955 | 4.403749 | 1.06E-05  | 5.12E-05  | 0        | 0        | 3.478657 | 29.01765 | 47.06043 | 11.05477 |
| 2524  | LOC103227 | 37.61039 | 4.750731 | 0.669945 | 7.091229 | 1.33E-12  | 1.40E-11  | 0        | 2.189647 | 6.261582 | 78.12444 | 89.84265 | 49.24399 |
| 11565 | LOC119627 | 2.977846 | 4.747597 | 1.89748  | 2.502054 | 0.012348  | 0.028382  | 0        | 0.547412 | 0        | 11.16063 | 2.139111 | 4.019918 |
| 6490  | ATP10B    | 8.325724 | 4.746111 | 1.20316  | 3.944703 | 7.99E-05  | 0.000327  | 0        | 1.094824 | 0.695731 | 17.85702 | 19.252   | 11.05477 |
| 11248 | LOC119618 | 2.955035 | 4.745625 | 1.845995 | 2.70767  | 0.010147  | 0.023984  | 0        | 0        | 0.695731 | 6.696381 | 4.278221 | 6.029877 |
| 6638  | TEX11     | 8.331746 | 4.741117 | 1.220937 | 3.883178 | 0.000103  | 0.000413  | 0        | 1.094824 | 0.695731 | 15.62489 | 23.53022 | 9.044815 |
| 11324 | LIX1      | 2.961456 | 4.740194 | 1.857445 | 2.551997 | 0.010711  | 0.025145  | 0.542086 | 0        | 0        | 8.928508 | 4.278221 | 4.019918 |
| 11304 | TTL2      | 2.987063 | 4.740063 | 1.853829 | 2.556904 | 0.010561  | 0.024833  | 0        | 0        | 0.695731 | 8.928508 | 4.278221 | 4.019918 |
| 11305 | LOC119626 | 2.987063 | 4.740063 | 1.853829 | 2.556904 | 0.010561  | 0.024833  | 0        | 0        | 0.695731 | 8.928508 | 4.278221 | 4.019918 |
| 11306 | LOC103230 | 2.987063 | 4.740063 | 1.853829 | 2.556904 | 0.010561  | 0.024833  | 0        | 0        | 0.695731 | 8.928508 | 4.278221 | 4.019918 |
| 11269 | LOC103215 | 2.934532 | 4.739816 | 1.847242 | 2.565889 | 0.010291  | 0.024278  | 0        | 0        | 0.695731 | 4.464254 | 6.417332 | 6.029877 |
| 16745 | LOC103248 | 1.488085 | 4.738446 | 3.08885  | 1.534048 | 0.125018  | 0.198459  | 0        | 0        | 0        | 8.928508 | 0        | 0        |
| 16746 | DAOA      | 1.488085 | 4.738446 | 3.08885  | 1.534048 | 0.125018  | 0.198459  | 0        | 0        | 0        | 8.928508 | 0        | 0        |
| 16747 | LOC119620 | 1.488085 | 4.738446 | 3.08885  | 1.534048 | 0.125018  | 0.198459  | 0        | 0        | 0        | 8.928508 | 0        | 0        |
| 5852  | WFDC9     | 5.992888 | 4.737851 | 1.465065 | 3.233884 | 0.001221  | 0.003783  | 0        | 0.547412 | 0.695731 | 17.85702 | 6.417332 | 8.039836 |
| 11600 | MARCOL    | 2.599371 | 4.737721 | 1.898977 | 2.49488  | 0.0126    | 0.028877  | 0        | 0.547412 | 0        | 11.16063 | 4.278221 | 2.009959 |
| 11578 | LOC103214 | 3.024091 | 4.737467 | 1.895382 | 2.499479 | 0.012438  | 0.028559  | 0        | 0        | 0.695731 | 11.16063 | 4.278221 | 2.009959 |
| 11261 | ETDB      | 2.97156  | 4.73379  | 1.843805 | 2.567403 | 0.010246  | 0.024187  | 0        | 0        | 0.695731 | 6.696381 | 6.417332 | 4.019918 |
| 11262 | LOC119625 | 2.97156  | 4.73379  | 1.843805 | 2.567403 | 0.010246  | 0.024187  | 0        | 0        | 0.695731 | 6.696381 | 6.417332 | 4.019918 |
| 9625  | LOC119627 | 5.961188 | 4.732852 | 1.602288 | 2.953809 | 0.003139  | 0.00867   | 0        | 0        | 1.391463 | 6.696381 | 25.66933 | 2.009959 |
| 6806  | PPEF2     | 8.598019 | 4.732796 | 1.240693 | 3.814638 | 0.000136  | 0.000533  | 0        | 0.547412 | 1.391463 | 20.08914 | 23.53022 | 6.029877 |
| 7585  | ITPRID1   | 8.901743 | 4.73035  | 1.33976  | 3.530743 | 0.000414  | 0.001452  | 0        | 0        | 2.087194 | 8.928508 | 36.36488 | 6.029877 |
| 11495 | LOC119626 | 3.008588 | 4.730212 | 1.879625 | 2.516572 | 0.01185   | 0.0274    | 0        | 0        | 0.695731 | 8.928508 | 6.417332 | 2.009959 |
| 11496 | LOC103225 | 3.008588 | 4.730212 | 1.879625 | 2.516572 | 0.01185   | 0.0274    | 0        | 0        | 0.695731 | 8.928508 | 6.417332 | 2.009959 |
| 11497 | LOC119620 | 3.008588 | 4.730212 | 1.879625 | 2.516572 | 0.01185   | 0.0274    | 0        | 0        | 0.695731 | 8.928508 | 6.417332 | 2.009959 |
| 11498 | LOC103218 | 3.008588 | 4.730212 | 1.879625 | 2.516572 | 0.01185   | 0.0274    | 0        | 0        | 0.695731 | 8.928508 | 6.417332 | 2.009959 |
| 6818  | KCNV2     | 8.762687 | 4.729185 | 1.241216 | 3.810122 | 0.000139  | 0.000542  | 0        | 0        | 2.087194 | 22.32127 | 17.11289 | 11.05477 |
| 6744  | TRARG1    | 8.710157 | 4.728815 | 1.231447 | 3.840046 | 0.000123  | 0.000485  | 0        | 0        | 2.087194 | 17.85702 | 19.252   | 13.06473 |
| 8537  | SLC6A5    | 5.59891  | 4.728605 | 1.457485 | 3.244361 | 0.001177  | 0.003666  | 0        | 0.547412 | 0.695731 | 15.62489 | 10.69555 | 6.029877 |
| 5303  | LOC103225 | 11.24193 | 4.728305 | 1.047105 | 4.515599 | 6.31E-06  | 3.17E-05  | 0        | 0.547412 | 2.087194 | 22.32127 | 21.39111 | 21.10457 |
| 11352 | LOC103218 | 2.956058 | 4.728258 | 1.85623  | 2.547237 | 0.010858  | 0.025428  | 0        | 0        | 0.695731 | 4.464254 | 8.556443 | 4.019918 |
| 6049  | ASB4      | 11.51359 | 4.72651  | 1.140471 | 4.144349 | 3.41E-05  | 0.00015   | 0        | 0.547412 | 2.087194 | 15.62489 | 42.78221 | 8.039836 |
| 12441 | LOC119625 | 2.878807 | 4.725799 | 2.043427 | 2.312683 | 0.02074   | 0.044319  | 0        | 0.547412 | 0        | 0        | 10.69555 | 6.029877 |
| 12833 | KCNA7     | 2.973501 | 4.725176 | 2.11582  | 2.233259 | 0.025532  | 0.052892  | 0.542086 | 0        | 0        | 4.464254 | 12.83466 | 0        |
| 12830 | ARG1      | 2.974388 | 4.725167 | 2.115665 | 2.233419 | 0.025521  | 0.052883  | 0        | 0.547412 | 0        | 4.464254 | 12.83466 | 0        |
| 12804 | RIPK3     | 2.999108 | 4.724916 | 2.11136  | 2.237855 | 0.025231  | 0.052386  | 0        | 0        | 0.695731 | 4.464254 | 12.83466 | 0        |
| 10235 | TAC1      | 5.663486 | 4.724866 | 1.683264 | 2.806967 | 0.005001  | 0.01299   | 0        | 0.547412 | 0.695731 | 15.62489 | 17.11289 | 0        |
| 5271  | LOC103215 | 14.73336 | 4.724318 | 1.041276 | 4.537046 | 5.70E-06  | 2.88E-05  | 0        | 0        | 3.478657 | 33.4819  | 36.36488 | 15.07469 |
| 11513 | LOC119615 | 2.993086 | 4.724165 | 1.880812 | 2.511768 | 0.012013  | 0.027737  | 0        | 0        | 0.695731 | 6.696381 | 8.556443 | 2.009959 |



|       |           |          |          |          |          |          |          |          |          |          |          |          |          |
|-------|-----------|----------|----------|----------|----------|----------|----------|----------|----------|----------|----------|----------|----------|
| 11514 | LOC103243 | 2.993086 | 4.724165 | 1.880812 | 2.511768 | 0.012013 | 0.027737 | 0        | 0        | 0.695731 | 6.696381 | 8.556443 | 2.009959 |
| 8743  | LOC119625 | 5.478346 | 4.723952 | 1.480822 | 3.190089 | 0.001422 | 0.004325 | 0        | 0.547412 | 0.695731 | 4.464254 | 17.11289 | 10.04979 |
| 11626 | LOC119627 | 2.940555 | 4.72339  | 1.899071 | 2.487211 | 0.012875 | 0.029433 | 0        | 0        | 0.695731 | 2.232127 | 10.69555 | 4.019918 |
| 11627 | LOC103246 | 2.940555 | 4.72339  | 1.899071 | 2.487211 | 0.012875 | 0.029433 | 0        | 0        | 0.695731 | 2.232127 | 10.69555 | 4.019918 |
| 11628 | LOC119615 | 2.940555 | 4.72339  | 1.899071 | 2.487211 | 0.012875 | 0.029433 | 0        | 0        | 0.695731 | 2.232127 | 10.69555 | 4.019918 |
| 11629 | IL20      | 2.940555 | 4.72339  | 1.899071 | 2.487211 | 0.012875 | 0.029433 | 0        | 0        | 0.695731 | 2.232127 | 10.69555 | 4.019918 |
| 13149 | LOC103244 | 2.958886 | 4.721073 | 2.164472 | 2.181166 | 0.029171 | 0.058974 | 0        | 0.547412 | 0        | 2.232127 | 14.97377 | 0        |
| 13150 | LOC103247 | 2.958886 | 4.721073 | 2.164472 | 2.181166 | 0.029171 | 0.058974 | 0        | 0.547412 | 0        | 2.232127 | 14.97377 | 0        |
| 13113 | LOC103226 | 2.983606 | 4.720851 | 2.160114 | 2.185464 | 0.028855 | 0.0585   | 0        | 0        | 0.695731 | 2.232127 | 14.97377 | 0        |
| 9113  | TCEAL6    | 5.85916  | 4.719543 | 1.532439 | 3.07976  | 0.002072 | 0.006044 | 0        | 0        | 1.391463 | 22.32127 | 6.417332 | 5.024897 |
| 11653 | LOC119624 | 2.952863 | 4.719423 | 1.902539 | 2.480592 | 0.013116 | 0.029924 | 0        | 0.547412 | 0        | 4.464254 | 10.69555 | 2.009959 |
| 11639 | TCERG1L   | 2.977583 | 4.719202 | 1.89902  | 2.485072 | 0.012953 | 0.02958  | 0        | 0        | 0.695731 | 4.464254 | 10.69555 | 2.009959 |
| 11640 | LOC119615 | 2.977583 | 4.719202 | 1.89902  | 2.485072 | 0.012953 | 0.02958  | 0        | 0        | 0.695731 | 4.464254 | 10.69555 | 2.009959 |
| 11641 | LOC119615 | 2.977583 | 4.719202 | 1.89902  | 2.485072 | 0.012953 | 0.02958  | 0        | 0        | 0.695731 | 4.464254 | 10.69555 | 2.009959 |
| 15502 | C1QTNF4   | 1.414029 | 4.717321 | 2.705305 | 1.74373  | 0.081206 | 0.139264 | 0        | 0        | 0        | 4.464254 | 0        | 4.019918 |
| 1762  | FGF1      | 50.3743  | 4.716428 | 0.550567 | 8.566499 | 1.07E-17 | 1.61E-16 | 1.626259 | 1.642235 | 8.348776 | 95.98146 | 111.2338 | 83.4133  |
| 7127  | SPATA22   | 8.774732 | 4.716076 | 1.278797 | 3.687901 | 0.000226 | 0.000843 | 0        | 0        | 2.087194 | 17.85702 | 25.66933 | 7.034856 |
| 12794 | LOC119625 | 2.946577 | 4.715936 | 2.104635 | 2.240738 | 0.025043 | 0.052034 | 0        | 0        | 0.695731 | 0        | 14.97377 | 2.009959 |
| 6937  | PIWIL3    | 8.247786 | 4.71502  | 1.253349 | 3.761936 | 0.000169 | 0.000646 | 0        | 1.094824 | 0.695731 | 24.5534  | 17.11289 | 6.029877 |
| 8725  | LOC103215 | 5.723093 | 4.714607 | 1.475877 | 3.194444 | 0.001401 | 0.004268 | 0        | 0        | 1.391463 | 8.928508 | 14.97377 | 9.044815 |
| 6743  | LOC103225 | 8.433092 | 4.714214 | 1.227565 | 3.840296 | 0.000123 | 0.000484 | 0.542086 | 0        | 1.391463 | 26.78552 | 12.83466 | 9.044815 |
| 15749 | LOC103235 | 1.472582 | 4.714011 | 2.760103 | 1.707912 | 0.087653 | 0.147877 | 0        | 0        | 0        | 6.696381 | 2.139111 | 0        |
| 15750 | LOC119624 | 1.472582 | 4.714011 | 2.760103 | 1.707912 | 0.087653 | 0.147877 | 0        | 0        | 0        | 6.696381 | 2.139111 | 0        |
| 15751 | LOC119625 | 1.472582 | 4.714011 | 2.760103 | 1.707912 | 0.087653 | 0.147877 | 0        | 0        | 0        | 6.696381 | 2.139111 | 0        |
| 15752 | LOC119627 | 1.472582 | 4.714011 | 2.760103 | 1.707912 | 0.087653 | 0.147877 | 0        | 0        | 0        | 6.696381 | 2.139111 | 0        |
| 15754 | LOC103245 | 1.472582 | 4.714011 | 2.760103 | 1.707912 | 0.087653 | 0.147877 | 0        | 0        | 0        | 6.696381 | 2.139111 | 0        |
| 15755 | LOC103245 | 1.472582 | 4.714011 | 2.760103 | 1.707912 | 0.087653 | 0.147877 | 0        | 0        | 0        | 6.696381 | 2.139111 | 0        |
| 15756 | BP1FA3    | 1.472582 | 4.714011 | 2.760103 | 1.707912 | 0.087653 | 0.147877 | 0        | 0        | 0        | 6.696381 | 2.139111 | 0        |
| 15757 | LOC119625 | 1.472582 | 4.714011 | 2.760103 | 1.707912 | 0.087653 | 0.147877 | 0        | 0        | 0        | 6.696381 | 2.139111 | 0        |
| 15758 | LOC103235 | 1.472582 | 4.714011 | 2.760103 | 1.707912 | 0.087653 | 0.147877 | 0        | 0        | 0        | 6.696381 | 2.139111 | 0        |
| 2944  | SLC22A2   | 24.90296 | 4.712674 | 0.725721 | 6.493782 | 8.37E-11 | 7.56E-10 | 1.626259 | 0.547412 | 3.478657 | 60.26743 | 51.33866 | 32.15934 |
| 6630  | LAX1      | 8.105696 | 4.712115 | 1.211941 | 3.888071 | 0.000101 | 0.000405 | 0        | 1.094824 | 0.695731 | 13.39276 | 21.39111 | 12.05975 |
| 15773 | LOC103224 | 1.377001 | 4.711509 | 2.761484 | 1.706151 | 0.08798  | 0.148288 | 0        | 0        | 0        | 2.232127 | 0        | 6.029877 |
| 4179  | FAM83A    | 19.83816 | 4.710502 | 0.898515 | 5.242539 | 1.58E-07 | 1.01E-06 | 0.542086 | 0.547412 | 3.478657 | 26.78552 | 70.59065 | 17.08465 |
| 8895  | TRAF3IP3  | 5.797149 | 4.709597 | 1.497059 | 3.1459   | 0.001656 | 0.004949 | 0        | 0        | 1.391463 | 13.39276 | 14.97377 | 5.024897 |
| 14609 | LOC103248 | 1.398526 | 4.709321 | 2.472431 | 1.904733 | 0.056815 | 0.103356 | 0        | 0        | 0        | 2.232127 | 2.139111 | 4.019918 |
| 14610 | LOC103235 | 1.398526 | 4.709321 | 2.472431 | 1.904733 | 0.056815 | 0.103356 | 0        | 0        | 0        | 2.232127 | 2.139111 | 4.019918 |
| 14613 | LOC119615 | 1.398526 | 4.709321 | 2.472431 | 1.904733 | 0.056815 | 0.103356 | 0        | 0        | 0        | 2.232127 | 2.139111 | 4.019918 |
| 14614 | RNA5E9    | 1.398526 | 4.709321 | 2.472431 | 1.904733 | 0.056815 | 0.103356 | 0        | 0        | 0        | 2.232127 | 2.139111 | 4.019918 |
| 6986  | LOC103248 | 8.185775 | 4.706261 | 1.258397 | 3.739884 | 0.000184 | 0.000701 | 0        | 1.094824 | 0.695731 | 15.62489 | 25.66933 | 6.029877 |
| 8951  | SLAMF6    | 5.781647 | 4.705868 | 1.502633 | 3.131748 | 0.001738 | 0.005161 | 0        | 0        | 1.391463 | 11.16063 | 17.11289 | 5.024897 |
| 4946  | LOC119627 | 14.20012 | 4.704808 | 0.997493 | 4.716634 | 2.40E-06 | 1.29E-05 | 0        | 0.547412 | 2.782925 | 35.71403 | 32.08666 | 14.06971 |
| 5186  | IGF1      | 20.38993 | 4.704571 | 1.025508 | 4.587551 | 4.48E-06 | 2.30E-05 | 0        | 0.547412 | 4.174388 | 35.71403 | 74.86887 | 7.034856 |
| 14516 | SPRR4     | 1.435554 | 4.704104 | 2.450404 | 1.919726 | 0.054893 | 0.100461 | 0        | 0        | 0        | 4.464254 | 2.139111 | 2.009959 |
| 14517 | LOC119624 | 1.435554 | 4.704104 | 2.450404 | 1.919726 | 0.054893 | 0.100461 | 0        | 0        | 0        | 4.464254 | 2.139111 | 2.009959 |
| 14519 | AADAC     | 1.435554 | 4.704104 | 2.450404 | 1.919726 | 0.054893 | 0.100461 | 0        | 0        | 0        | 4.464254 | 2.139111 | 2.009959 |
| 14520 | LOC103228 | 1.435554 | 4.704104 | 2.450404 | 1.919726 | 0.054893 | 0.100461 | 0        | 0        | 0        | 4.464254 | 2.139111 | 2.009959 |
| 14521 | HBD       | 1.435554 | 4.704104 | 2.450404 | 1.919726 | 0.054893 | 0.100461 | 0        | 0        | 0        | 4.464254 | 2.139111 | 2.009959 |
| 14525 | LOC119627 | 1.435554 | 4.704104 | 2.450404 | 1.919726 | 0.054893 | 0.100461 | 0        | 0        | 0        | 4.464254 | 2.139111 | 2.009959 |
| 14526 | LOC119627 | 1.435554 | 4.704104 | 2.450404 | 1.919726 | 0.054893 | 0.100461 | 0        | 0        | 0        | 4.464254 | 2.139111 | 2.009959 |
| 14527 | LOC103235 | 1.435554 | 4.704104 | 2.450404 | 1.919726 | 0.054893 | 0.100461 | 0        | 0        | 0        | 4.464254 | 2.139111 | 2.009959 |
| 14528 | LOC119627 | 1.435554 | 4.704104 | 2.450404 | 1.919726 | 0.054893 | 0.100461 | 0        | 0        | 0        | 4.464254 | 2.139111 | 2.009959 |
| 6915  | NDST3     | 8.153882 | 4.702584 | 1.24768  | 3.769062 | 0.000164 | 0.00063  | 0.542086 | 0.547412 | 0.695731 | 11.16063 | 29.94755 | 6.029877 |
| 6695  | CUNH16or  | 8.356466 | 4.701836 | 1.218571 | 3.858483 | 0.000114 | 0.000453 | 0        | 0.547412 | 1.391463 | 15.62489 | 23.53022 | 9.044815 |
| 9783  | LCN6      | 5.871205 | 4.701715 | 1.616948 | 2.907715 | 0.00364  | 0.009892 | 0        | 0        | 1.391463 | 17.85702 | 14.97377 | 1.004979 |
| 9033  | SAMD7     | 5.766144 | 4.701551 | 1.514344 | 3.104678 | 0.001905 | 0.005606 | 0        | 0        | 1.391463 | 8.928508 | 19.252   | 5.024897 |
| 6824  | LGALS12   | 8.393494 | 4.700404 | 1.233989 | 3.809113 | 0.000139 | 0.000543 | 0        | 0.547412 | 1.391463 | 17.85702 | 23.53022 | 7.034856 |
| 15701 | LOC103236 | 1.457079 | 4.699888 | 2.739581 | 1.71555  | 0.086244 | 0.145899 | 0        | 0        | 0        | 4.464254 | 4.278221 | 0        |
| 15702 | LOC119624 | 1.457079 | 4.699888 | 2.739581 | 1.71555  | 0.086244 | 0.145899 | 0        | 0        | 0        | 4.464254 | 4.278221 | 0        |
| 15703 | LOC103235 | 1.457079 | 4.699888 | 2.739581 | 1.71555  | 0.086244 | 0.145899 | 0        | 0        | 0        | 4.464254 | 4.278221 | 0        |
| 15704 | LOC103235 | 1.457079 | 4.699888 | 2.739581 | 1.71555  | 0.086244 | 0.145899 | 0        | 0        | 0        | 4.464254 | 4.278221 | 0        |
| 15705 | LOC103247 | 1.457079 | 4.699888 | 2.739581 | 1.71555  | 0.086244 | 0.145899 | 0        | 0        | 0        | 4.464254 | 4.278221 | 0        |
| 15706 | LOC119625 | 1.457079 | 4.699888 | 2.739581 | 1.71555  | 0.086244 | 0.145899 | 0        | 0        | 0        | 4.464254 | 4.278221 | 0        |
| 15707 | PATE4     | 1.457079 | 4.699888 | 2.739581 | 1.71555  | 0.086244 | 0.145899 | 0        | 0        | 0        | 4.464254 | 4.278221 | 0        |
| 15708 | LOC119627 | 1.457079 | 4.699888 | 2.739581 | 1.71555  | 0.086244 | 0.145899 | 0        | 0        | 0        | 4.464254 | 4.278221 | 0        |
| 15709 | LOC119628 | 1.457079 | 4.699888 | 2.739581 | 1.71555  | 0.086244 | 0.145899 | 0        | 0        | 0        | 4.464254 | 4.278221 | 0        |
| 15710 | LOC119615 | 1.457079 | 4.699888 | 2.739581 | 1.71555  | 0.086244 | 0.145899 | 0        | 0        | 0        | 4.464254 | 4.278221 | 0        |
| 15711 | LOC119615 | 1.457079 | 4.699888 | 2.739581 | 1.71555  | 0.086244 | 0.145899 | 0        | 0        | 0        | 4.464254 | 4.278221 | 0        |
| 15712 | TECRL     | 1.457079 | 4.699888 | 2.739581 | 1.71555  | 0.086244 | 0.145899 | 0        | 0        | 0        | 4.464254 | 4.278221 | 0        |
| 15713 | TAS2R50   | 1.457079 | 4.699888 | 2.739581 | 1.71555  | 0.086244 | 0.145899 | 0        | 0        | 0        | 4.464254 | 4.278221 | 0        |
| 15714 | OMG       | 1.457079 | 4.699888 | 2.739581 | 1.71555  | 0.086244 | 0.145899 | 0        | 0        | 0        | 4.464254 | 4.278221 | 0        |
| 15715 | GPR142    | 1.457079 | 4.699888 | 2.739581 | 1.71555  | 0.086244 | 0.145899 | 0        | 0        | 0        | 4.464254 | 4.278221 | 0        |
| 206   | LRCOL1    | 257.113  | 4.699883 | 0.234938 | 20.00477 | 5.00E-89 | 6.46E-87 | 22.22554 | 13.6853  | 21.56767 | 506.6928 | 477.0217 | 501.4848 |
| 7106  | SMYD1     | 7.70027  | 4.697717 | 1.271569 | 3.694425 | 0.00022  | 0.000825 | 1.626259 | 0        | 0        | 13.39276 | 17.11289 | 14.06971 |



|       |           |          |          |          |          |          |          |          |          |          |          |          |          |
|-------|-----------|----------|----------|----------|----------|----------|----------|----------|----------|----------|----------|----------|----------|
| 5639  | GPR12     | 11.17603 | 4.693031 | 1.077544 | 4.355305 | 1.33E-05 | 6.26E-05 | 0        | 0.547412 | 2.087194 | 24.5534  | 27.80844 | 12.05975 |
| 14580 | LOC103215 | 1.420051 | 4.691961 | 2.457211 | 1.909466 | 0.056202 | 0.102429 | 0        | 0        | 0        | 2.232127 | 4.278221 | 2.009959 |
| 14582 | LOC103235 | 1.420051 | 4.691961 | 2.457211 | 1.909466 | 0.056202 | 0.102429 | 0        | 0        | 0        | 2.232127 | 4.278221 | 2.009959 |
| 14583 | LOC103230 | 1.420051 | 4.691961 | 2.457211 | 1.909466 | 0.056202 | 0.102429 | 0        | 0        | 0        | 2.232127 | 4.278221 | 2.009959 |
| 14584 | LOC103235 | 1.420051 | 4.691961 | 2.457211 | 1.909466 | 0.056202 | 0.102429 | 0        | 0        | 0        | 2.232127 | 4.278221 | 2.009959 |
| 14585 | LOC119625 | 1.420051 | 4.691961 | 2.457211 | 1.909466 | 0.056202 | 0.102429 | 0        | 0        | 0        | 2.232127 | 4.278221 | 2.009959 |
| 14586 | TAS2R39   | 1.420051 | 4.691961 | 2.457211 | 1.909466 | 0.056202 | 0.102429 | 0        | 0        | 0        | 2.232127 | 4.278221 | 2.009959 |
| 14587 | LOC119625 | 1.420051 | 4.691961 | 2.457211 | 1.909466 | 0.056202 | 0.102429 | 0        | 0        | 0        | 2.232127 | 4.278221 | 2.009959 |
| 15662 | LOC103248 | 1.383023 | 4.691705 | 2.723399 | 1.722739 | 0.084936 | 0.144153 | 0        | 0        | 0        | 0        | 4.278221 | 4.019918 |
| 15663 | LOC103235 | 1.383023 | 4.691705 | 2.723399 | 1.722739 | 0.084936 | 0.144153 | 0        | 0        | 0        | 0        | 4.278221 | 4.019918 |
| 15664 | LOC103235 | 1.383023 | 4.691705 | 2.723399 | 1.722739 | 0.084936 | 0.144153 | 0        | 0        | 0        | 0        | 4.278221 | 4.019918 |
| 3548  | IKZF1     | 31.4114  | 4.688798 | 0.807595 | 5.805878 | 6.40E-09 | 4.80E-08 | 0        | 1.094824 | 6.261582 | 71.42806 | 85.56443 | 24.11951 |
| 9165  | CYP1A2    | 5.202169 | 4.688402 | 1.53086  | 3.062594 | 0.002194 | 0.006366 | 0        | 1.094824 | 0        | 13.39276 | 10.69555 | 6.029877 |
| 15863 | TRIM60    | 1.441576 | 4.687919 | 2.776628 | 1.68835  | 0.091344 | 0.152972 | 0        | 0        | 0        | 2.232127 | 6.417332 | 0        |
| 15864 | SCGB1D2   | 1.441576 | 4.687919 | 2.776628 | 1.68835  | 0.091344 | 0.152972 | 0        | 0        | 0        | 2.232127 | 6.417332 | 0        |
| 15865 | CRYGC     | 1.441576 | 4.687919 | 2.776628 | 1.68835  | 0.091344 | 0.152972 | 0        | 0        | 0        | 2.232127 | 6.417332 | 0        |
| 15866 | LOC119625 | 1.441576 | 4.687919 | 2.776628 | 1.68835  | 0.091344 | 0.152972 | 0        | 0        | 0        | 2.232127 | 6.417332 | 0        |
| 15868 | LOC119625 | 1.441576 | 4.687919 | 2.776628 | 1.68835  | 0.091344 | 0.152972 | 0        | 0        | 0        | 2.232127 | 6.417332 | 0        |
| 15869 | LOC103215 | 1.441576 | 4.687919 | 2.776628 | 1.68835  | 0.091344 | 0.152972 | 0        | 0        | 0        | 2.232127 | 6.417332 | 0        |
| 15870 | LOC119615 | 1.441576 | 4.687919 | 2.776628 | 1.68835  | 0.091344 | 0.152972 | 0        | 0        | 0        | 2.232127 | 6.417332 | 0        |
| 15871 | LOC119620 | 1.441576 | 4.687919 | 2.776628 | 1.68835  | 0.091344 | 0.152972 | 0        | 0        | 0        | 2.232127 | 6.417332 | 0        |
| 15872 | LOC119620 | 1.441576 | 4.687919 | 2.776628 | 1.68835  | 0.091344 | 0.152972 | 0        | 0        | 0        | 2.232127 | 6.417332 | 0        |
| 15873 | LOC119625 | 1.441576 | 4.687919 | 2.776628 | 1.68835  | 0.091344 | 0.152972 | 0        | 0        | 0        | 2.232127 | 6.417332 | 0        |
| 15874 | DEFB132   | 1.441576 | 4.687919 | 2.776628 | 1.68835  | 0.091344 | 0.152972 | 0        | 0        | 0        | 2.232127 | 6.417332 | 0        |
| 15875 | LOC103245 | 1.441576 | 4.687919 | 2.776628 | 1.68835  | 0.091344 | 0.152972 | 0        | 0        | 0        | 2.232127 | 6.417332 | 0        |
| 9373  | LOC119620 | 5.259835 | 4.686959 | 1.555126 | 3.013878 | 0.002579 | 0.007316 | 0.542086 | 0.547412 | 0        | 15.62489 | 12.83466 | 2.009959 |
| 10810 | TULP1     | 21.19703 | 4.685611 | 1.755465 | 2.669157 | 0.007604 | 0.018701 | 0        | 0        | 4.87012  | 40.17829 | 62.03421 | 20.09959 |
| 16969 | LOC119625 | 1.426074 | 4.684159 | 3.130176 | 1.496452 | 0.134536 | 0.21071  | 0        | 0        | 0        | 0        | 8.556443 | 0        |
| 16970 | LOC119625 | 1.426074 | 4.684159 | 3.130176 | 1.496452 | 0.134536 | 0.21071  | 0        | 0        | 0        | 0        | 8.556443 | 0        |
| 16971 | LOC103226 | 1.426074 | 4.684159 | 3.130176 | 1.496452 | 0.134536 | 0.21071  | 0        | 0        | 0        | 0        | 8.556443 | 0        |
| 16972 | LOC103225 | 1.426074 | 4.684159 | 3.130176 | 1.496452 | 0.134536 | 0.21071  | 0        | 0        | 0        | 0        | 8.556443 | 0        |
| 16973 | LOC119618 | 1.426074 | 4.684159 | 3.130176 | 1.496452 | 0.134536 | 0.21071  | 0        | 0        | 0        | 0        | 8.556443 | 0        |
| 16974 | LOC119615 | 1.426074 | 4.684159 | 3.130176 | 1.496452 | 0.134536 | 0.21071  | 0        | 0        | 0        | 0        | 8.556443 | 0        |
| 16975 | LOC119625 | 1.426074 | 4.684159 | 3.130176 | 1.496452 | 0.134536 | 0.21071  | 0        | 0        | 0        | 0        | 8.556443 | 0        |
| 15729 | LOC119618 | 1.404548 | 4.682429 | 2.73429  | 1.712484 | 0.086807 | 0.146665 | 0        | 0        | 0        | 0        | 6.417332 | 2.009959 |
| 15730 | CXCL9     | 1.404548 | 4.682429 | 2.73429  | 1.712484 | 0.086807 | 0.146665 | 0        | 0        | 0        | 0        | 6.417332 | 2.009959 |
| 15731 | ZFP42     | 1.404548 | 4.682429 | 2.73429  | 1.712484 | 0.086807 | 0.146665 | 0        | 0        | 0        | 0        | 6.417332 | 2.009959 |
| 15732 | LOC103235 | 1.404548 | 4.682429 | 2.73429  | 1.712484 | 0.086807 | 0.146665 | 0        | 0        | 0        | 0        | 6.417332 | 2.009959 |
| 15733 | LOC103215 | 1.404548 | 4.682429 | 2.73429  | 1.712484 | 0.086807 | 0.146665 | 0        | 0        | 0        | 0        | 6.417332 | 2.009959 |
| 15734 | GLTG6D1   | 1.404548 | 4.682429 | 2.73429  | 1.712484 | 0.086807 | 0.146665 | 0        | 0        | 0        | 0        | 6.417332 | 2.009959 |
| 15735 | LOC119625 | 1.404548 | 4.682429 | 2.73429  | 1.712484 | 0.086807 | 0.146665 | 0        | 0        | 0        | 0        | 6.417332 | 2.009959 |
| 10173 | TRNAP-UG  | 5.793692 | 4.681755 | 1.659587 | 2.821036 | 0.004787 | 0.012509 | 0        | 0        | 1.391463 | 6.696381 | 25.66933 | 1.004979 |
| 11042 | CYP11B1   | 5.112186 | 4.677684 | 1.786368 | 2.618544 | 0.008831 | 0.021261 | 0        | 1.094824 | 0        | 24.5534  | 0        | 5.024897 |
| 5699  | LOC103225 | 10.86796 | 4.676022 | 1.08056  | 4.327405 | 1.51E-05 | 7.04E-05 | 0.542086 | 0.547412 | 1.391463 | 29.01765 | 25.66933 | 8.039836 |
| 5415  | KCNJ10    | 10.7784  | 4.675311 | 1.049623 | 4.454277 | 8.42E-06 | 4.13E-05 | 0.542086 | 0.547412 | 1.391463 | 22.32127 | 27.80844 | 12.05975 |
| 9048  | LOC103235 | 5.452939 | 4.673051 | 1.50877  | 3.097258 | 0.001953 | 0.005739 | 0        | 0.547412 | 0.695731 | 15.62489 | 12.83466 | 3.014938 |
| 8214  | CRYBA2    | 8.650286 | 4.671029 | 1.397739 | 3.341846 | 0.000832 | 0.002694 | 0        | 0        | 2.087194 | 17.85702 | 29.94755 | 2.009959 |
| 5716  | PLCL1     | 10.74829 | 4.670977 | 1.082019 | 4.316909 | 1.58E-05 | 7.36E-05 | 0        | 1.094824 | 1.391463 | 17.85702 | 32.08666 | 12.05975 |
| 13280 | LOC103246 | 2.8876   | 4.670903 | 2.170955 | 2.151542 | 0.031433 | 0.062926 | 0        | 0        | 0.695731 | 15.62489 | 0        | 1.004979 |
| 8872  | CLEC7A    | 5.5711   | 4.6682   | 1.482095 | 3.149731 | 0.001634 | 0.004897 | 0        | 0        | 1.391463 | 11.16063 | 12.83466 | 8.039836 |
| 8982  | LOC103225 | 5.608128 | 4.665168 | 1.494305 | 3.121965 | 0.001796 | 0.005317 | 0        | 0        | 1.391463 | 13.39276 | 12.83466 | 6.029877 |
| 9000  | APOL1     | 5.518569 | 4.664433 | 1.49694  | 3.115979 | 0.001833 | 0.005416 | 0        | 0        | 1.391463 | 6.696381 | 14.97377 | 10.04979 |
| 12681 | NPVF      | 2.776516 | 4.664108 | 2.060487 | 2.263594 | 0.023599 | 0.049474 | 0        | 0        | 0.695731 | 8.928508 | 0        | 7.034856 |
| 7141  | LOC119625 | 8.427694 | 4.661789 | 1.26558  | 3.68352  | 0.00023  | 0.000856 | 0        | 0        | 2.087194 | 22.32127 | 17.11289 | 9.044815 |
| 9164  | LOC103225 | 5.645156 | 4.661594 | 1.522138 | 3.062531 | 0.002195 | 0.006366 | 0        | 0        | 1.391463 | 15.62489 | 12.83466 | 4.019918 |
| 9166  | LOC119618 | 5.645156 | 4.661594 | 1.522138 | 3.062531 | 0.002195 | 0.006366 | 0        | 0        | 1.391463 | 15.62489 | 12.83466 | 4.019918 |
| 9660  | LOC119620 | 5.697686 | 4.660892 | 1.583225 | 2.943923 | 0.003241 | 0.008919 | 0        | 0        | 1.391463 | 20.08914 | 10.69555 | 2.009959 |
| 5316  | RARRES1   | 13.58293 | 4.659163 | 1.032904 | 4.51074  | 6.46E-06 | 3.23E-05 | 0        | 1.094824 | 2.087194 | 46.87467 | 21.39111 | 10.04979 |
| 9082  | LOC119625 | 5.577122 | 4.657188 | 1.507741 | 3.088852 | 0.002009 | 0.005882 | 0        | 0        | 1.391463 | 8.928508 | 17.11289 | 6.029877 |
| 11873 | LOC103225 | 2.773321 | 4.656357 | 1.914265 | 2.432452 | 0.014997 | 0.03358  | 0        | 0.547412 | 0        | 8.928508 | 2.139111 | 5.024897 |
| 11847 | LOC103225 | 2.798041 | 4.656318 | 1.910316 | 2.437459 | 0.014791 | 0.033191 | 0        | 0        | 0.695731 | 8.928508 | 2.139111 | 5.024897 |
| 4997  | CUNH10or  | 13.03327 | 4.652768 | 0.992164 | 4.689514 | 2.74E-06 | 1.46E-05 | 1.084173 | 0.547412 | 1.391463 | 11.16063 | 44.92132 | 19.09461 |
| 5694  | QRFPR     | 10.78249 | 4.645609 | 1.073087 | 4.329203 | 1.50E-05 | 6.99E-05 | 0        | 0.547412 | 2.087194 | 22.32127 | 25.66933 | 14.06971 |
| 4130  | LOC103220 | 21.94516 | 4.645484 | 0.881287 | 5.271247 | 1.35E-07 | 8.72E-07 | 0        | 1.094824 | 4.174388 | 53.57105 | 57.75599 | 15.07469 |
| 12251 | DRD3      | 2.831875 | 4.644687 | 1.971639 | 2.355749 | 0.018485 | 0.040114 | 0        | 0.547412 | 0        | 11.16063 | 4.278221 | 1.004979 |
| 11808 | LOC119625 | 2.794847 | 4.644248 | 1.897442 | 2.447636 | 0.01438  | 0.032375 | 0        | 0.547412 | 0        | 8.928508 | 4.278221 | 3.014938 |
| 11783 | LOC103235 | 2.819567 | 4.644056 | 1.893622 | 2.452473 | 0.014188 | 0.031996 | 0        | 0        | 0.695731 | 8.928508 | 4.278221 | 3.014938 |
| 7919  | LOC119625 | 7.88781  | 4.643346 | 1.352536 | 3.433066 | 0.000597 | 0.002004 | 0        | 1.094824 | 0.695731 | 17.85702 | 25.66933 | 2.009959 |
| 7749  | LOC119620 | 8.408734 | 4.641417 | 1.334433 | 3.478195 | 0.000505 | 0.001732 | 0        | 0        | 2.087194 | 13.39276 | 29.94755 | 5.024897 |
| 8814  | LOC103235 | 5.168336 | 4.638148 | 1.462564 | 3.171244 | 0.001518 | 0.004578 | 0        | 0.547412 | 0.695731 | 11.16063 | 8.556443 | 10.04979 |
| 11938 | LOC103245 | 2.726813 | 4.637388 | 1.918848 | 2.416757 | 0.015659 | 0.034872 | 0        | 0.547412 | 0        | 2.232127 | 8.556443 | 5.024897 |
| 11912 | LOC119625 | 2.751533 | 4.637384 | 1.914797 | 2.421868 | 0.015441 | 0.034458 | 0        | 0        | 0.695731 | 2.232127 | 8.556443 | 5.024897 |
| 11913 | SIRPD     | 2.751533 | 4.637384 | 1.914797 | 2.421868 | 0.015441 | 0.034458 | 0        | 0        | 0.695731 | 2.232127 | 8.556443 | 5.024897 |
| 11735 | LOC103224 | 2.804064 | 4.637193 | 1.883819 | 2.461591 | 0.013832 | 0.031333 | 0        | 0        | 0.695731 | 6.696381 | 6.417332 | 3.014938 |



|       |           |          |          |          |          |           |           |          |          |          |          |          |          |
|-------|-----------|----------|----------|----------|----------|-----------|-----------|----------|----------|----------|----------|----------|----------|
| 11736 | LOC119621 | 2.804064 | 4.637193 | 1.883819 | 2.461591 | 0.013832  | 0.031333  | 0        | 0        | 0.695731 | 6.696381 | 6.417332 | 3.014938 |
| 6984  | DSC1      | 8.052478 | 4.637142 | 1.239804 | 3.740222 | 0.000184  | 0.0007    | 0        | 0.547412 | 1.391463 | 20.08914 | 19.252   | 7.034856 |
| 6985  | ACSM4     | 8.052478 | 4.637142 | 1.239804 | 3.740222 | 0.000184  | 0.0007    | 0        | 0.547412 | 1.391463 | 20.08914 | 19.252   | 7.034856 |
| 5934  | AQP6      | 10.81003 | 4.637125 | 1.106026 | 4.1926   | 2.76E-05  | 0.000124  | 0        | 0.547412 | 2.087194 | 20.08914 | 32.08666 | 10.04979 |
| 5935  | LOC103231 | 10.81003 | 4.637125 | 1.106026 | 4.1926   | 2.76E-05  | 0.000124  | 0        | 0.547412 | 2.087194 | 20.08914 | 32.08666 | 10.04979 |
| 12183 | LOC119621 | 2.816372 | 4.63682  | 1.95651  | 2.369944 | 0.017791  | 0.038822  | 0        | 0.547412 | 0        | 8.928508 | 6.417332 | 1.004979 |
| 7229  | HCK       | 8.089506 | 4.636113 | 1.267326 | 3.658185 | 0.000254  | 0.000934  | 0        | 0.547412 | 1.391463 | 22.32127 | 19.252   | 5.024897 |
| 310   | HR        | 181.9427 | 4.634363 | 0.268556 | 17.25661 | 9.98E-67  | 8.56E-65  | 11.38381 | 17.51718 | 13.2189  | 381.6937 | 325.1448 | 342.698  |
| 11829 | LOC103211 | 2.788561 | 4.63139  | 1.896388 | 2.442216 | 0.014597  | 0.032804  | 0        | 0        | 0.695731 | 4.464254 | 8.556443 | 3.014938 |
| 11830 | LOC103231 | 2.788561 | 4.63139  | 1.896388 | 2.442216 | 0.014597  | 0.032804  | 0        | 0        | 0.695731 | 4.464254 | 8.556443 | 3.014938 |
| 12214 | MBOAT4    | 2.799982 | 4.63025  | 1.958114 | 2.364648 | 0.018047  | 0.039282  | 0.542086 | 0        | 0        | 6.696381 | 8.556443 | 1.004979 |
| 12213 | LOC103231 | 2.800869 | 4.630239 | 1.957974 | 2.364812 | 0.018039  | 0.039267  | 0        | 0.547412 | 0        | 6.696381 | 8.556443 | 1.004979 |
| 12186 | LOC119621 | 2.825589 | 4.629946 | 1.954107 | 2.369342 | 0.01782   | 0.038872  | 0        | 0        | 0.695731 | 6.696381 | 8.556443 | 1.004979 |
| 12187 | LOC119621 | 2.825589 | 4.629946 | 1.954107 | 2.369342 | 0.01782   | 0.038872  | 0        | 0        | 0.695731 | 6.696381 | 8.556443 | 1.004979 |
| 10121 | ACY3      | 4.935634 | 4.629766 | 1.634551 | 2.83244  | 0.004619  | 0.012134  | 0        | 1.094824 | 0        | 2.232127 | 19.252   | 7.034856 |
| 24    | ITGAX     | 3318.726 | 4.627588 | 0.129093 | 35.84701 | 2.05E-281 | 2.27E-278 | 244.481  | 240.8612 | 290.8157 | 6158.438 | 5683.617 | 7294.141 |
| 3744  | LOC119611 | 18.11739 | 4.62673  | 0.826287 | 5.599422 | 2.15E-08  | 1.53E-07  | 1.626259 | 0        | 2.782925 | 40.17829 | 29.94755 | 34.1693  |
| 13339 | LOC119611 | 305.901  | 4.626041 | 2.162105 | 2.139601 | 0.032387  | 0.064548  | 0        | 0.547412 | 70.9646  | 716.5128 | 802.1665 | 245.215  |
| 6068  | CPA3      | 10.18405 | 4.625218 | 1.117841 | 4.137636 | 3.51E-05  | 0.000154  | 0        | 1.642235 | 0.695731 | 15.62489 | 32.08666 | 11.05477 |
| 11242 | LOC119611 | 5.626195 | 4.62491  | 1.797865 | 2.572446 | 0.010098  | 0.02388   | 0        | 0        | 1.391463 | 6.696381 | 25.66933 | 0        |
| 12326 | LOC119621 | 2.785366 | 4.624824 | 1.976097 | 2.340383 | 0.019264  | 0.041549  | 0        | 0.547412 | 0        | 4.464254 | 10.69555 | 1.004979 |
| 12298 | LOC119621 | 2.810086 | 4.62455  | 1.972188 | 2.344883 | 0.019033  | 0.041144  | 0        | 0        | 0.695731 | 4.464254 | 10.69555 | 1.004979 |
| 4903  | CD93      | 19.51348 | 4.622406 | 0.975008 | 4.74089  | 2.13E-06  | 1.15E-05  | 0        | 0        | 4.87012  | 51.33892 | 42.78221 | 18.08963 |
| 12559 | LOC119621 | 2.794584 | 4.620659 | 2.016621 | 2.291288 | 0.021947  | 0.046453  | 0        | 0        | 0.695731 | 2.232127 | 12.83466 | 1.004979 |
| 12560 | FOX13     | 2.794584 | 4.620659 | 2.016621 | 2.291288 | 0.021947  | 0.046453  | 0        | 0        | 0.695731 | 2.232127 | 12.83466 | 1.004979 |
| 5878  | CD180     | 10.66752 | 4.619277 | 1.093024 | 4.226145 | 2.38E-05  | 0.000108  | 0        | 0.547412 | 2.087194 | 26.78552 | 23.53022 | 11.05477 |
| 9117  | LOC103221 | 5.232912 | 4.61781  | 1.499831 | 3.078887 | 0.002078  | 0.006059  | 0        | 0.547412 | 0.695731 | 11.16063 | 14.97377 | 4.019918 |
| 2098  | LOC103241 | 37.74026 | 4.617399 | 0.592077 | 7.798647 | 6.26E-15  | 7.93E-14  | 4.878777 | 0.547412 | 3.478657 | 62.49956 | 87.70354 | 67.33362 |
| 9273  | PGK2      | 5.456134 | 4.615461 | 1.518698 | 3.039091 | 0.002373  | 0.006803  | 0        | 0        | 1.391463 | 15.62489 | 10.69555 | 5.024897 |
| 3807  | KCNK9     | 27.33085 | 4.613571 | 0.834032 | 5.531645 | 3.17E-08  | 2.22E-07  | 0        | 0.547412 | 6.261582 | 46.87467 | 79.14709 | 31.15436 |
| 9199  | LOC103211 | 5.351072 | 4.612403 | 1.509884 | 3.054806 | 0.002252  | 0.006508  | 0        | 0        | 1.391463 | 6.696381 | 14.97377 | 9.044815 |
| 9178  | INHBC     | 5.3881   | 4.611345 | 1.506201 | 3.061574 | 0.002202  | 0.006378  | 0        | 0        | 1.391463 | 8.928508 | 14.97377 | 7.034856 |
| 9293  | PDCD1LG2  | 5.425128 | 4.608564 | 1.519041 | 3.033865 | 0.002414  | 0.006906  | 0        | 0        | 1.391463 | 11.16063 | 14.97377 | 5.024897 |
| 9730  | LOC103221 | 5.223432 | 4.608371 | 1.577748 | 3.028054 | 0.003491  | 0.009538  | 0        | 0.547412 | 0.695731 | 6.696381 | 21.39111 | 2.009959 |
| 9588  | LOC103221 | 5.462156 | 4.604972 | 1.553604 | 2.964058 | 0.003036  | 0.008418  | 0        | 0        | 1.391463 | 13.39276 | 14.97377 | 3.014938 |
| 1660  | LOC119621 | 44.66446 | 4.604086 | 0.522151 | 8.817538 | 1.17E-18  | 1.87E-17  | 1.626259 | 5.474118 | 3.478657 | 95.98146 | 77.00798 | 84.41828 |
| 7046  | ADARB2    | 7.832451 | 4.600531 | 1.238594 | 3.714318 | 0.000204  | 0.000769  | 0        | 0.547412 | 1.391463 | 15.62489 | 21.39111 | 8.039836 |
| 10212 | KRT24     | 5.499184 | 4.600465 | 1.635041 | 2.813669 | 0.004898  | 0.012751  | 0        | 0        | 1.391463 | 15.62489 | 14.97377 | 1.004979 |
| 9594  | LOC119611 | 5.357095 | 4.598987 | 1.552185 | 2.962911 | 0.003047  | 0.008444  | 0        | 0        | 1.391463 | 4.464254 | 19.252   | 7.034856 |
| 5919  | LOC103231 | 13.66034 | 4.598278 | 1.094272 | 4.202135 | 2.64E-05  | 0.000119  | 0        | 0        | 3.478657 | 26.78552 | 40.6431  | 11.05477 |
| 8184  | NOTO      | 7.604884 | 4.597062 | 1.371704 | 3.351351 | 0.000804  | 0.002612  | 0.542086 | 0.547412 | 0.695731 | 4.464254 | 36.36488 | 3.014938 |
| 113   | LOC119621 | 445.9497 | 4.587803 | 0.192629 | 23.8168  | 2.24E-125 | 5.26E-123 | 29.81475 | 39.96106 | 37.56949 | 848.2083 | 759.3843 | 960.7604 |
| 8265  | CUNH101   | 8.18226  | 4.587575 | 1.380115 | 3.324052 | 0.000887  | 0.002854  | 0        | 0        | 2.087194 | 29.01765 | 14.97377 | 3.014938 |
| 7652  | TBX10     | 7.252974 | 4.587217 | 1.307053 | 3.509587 | 0.000449  | 0.001559  | 0        | 1.642235 | 0        | 17.85702 | 14.97377 | 9.044815 |
| 4628  | GIMAP8    | 18.38155 | 4.585994 | 0.930077 | 4.930767 | 8.19E-07  | 4.71E-06  | 0        | 1.094824 | 3.478657 | 40.17829 | 53.47777 | 12.05975 |
| 6208  | CD244     | 10.49054 | 4.585377 | 1.126693 | 4.069768 | 4.71E-05  | 0.000202  | 0        | 0.547412 | 2.087194 | 22.32127 | 29.94755 | 8.039836 |
| 10192 | LOC119611 | 5.363117 | 4.584145 | 1.627182 | 2.817229 | 0.004844  | 0.012635  | 0        | 0        | 1.391463 | 2.232127 | 23.53022 | 5.024897 |
| 9679  | LOC119621 | 4.81287  | 4.583458 | 1.560534 | 2.937109 | 0.003313  | 0.009099  | 1.084173 | 0        | 0        | 8.928508 | 12.83466 | 6.029877 |
| 4862  | FFAR2     | 15.77358 | 4.583252 | 0.961558 | 4.766483 | 1.87E-06  | 1.03E-05  | 0        | 0.547412 | 3.478657 | 22.32127 | 49.19955 | 19.09461 |
| 9148  | ADRA1D    | 5.05337  | 4.582631 | 1.494094 | 3.067164 | 0.002161  | 0.00628   | 0        | 0.547412 | 0.695731 | 15.62489 | 6.417332 | 7.034856 |
| 9481  | KCNK12    | 4.881791 | 4.581924 | 1.532666 | 2.989512 | 0.002794  | 0.007835  | 0.542086 | 0.547412 | 0        | 15.62489 | 8.556443 | 4.019918 |
| 3062  | LOC103231 | 36.34829 | 4.580192 | 0.724844 | 6.318864 | 2.63E-10  | 2.29E-09  | 0        | 2.737059 | 6.261582 | 84.82083 | 94.12087 | 30.14938 |
| 989   | LGI3      | 69.83164 | 4.578159 | 0.414363 | 11.04867 | 2.22E-28  | 5.98E-27  | 8.131296 | 4.379295 | 4.174388 | 127.2312 | 128.3466 | 146.727  |
| 9218  | LOC119621 | 5.074895 | 4.575837 | 1.500158 | 3.050237 | 0.002287  | 0.006595  | 0        | 0.547412 | 0.695731 | 15.62489 | 8.556443 | 5.024897 |
| 7388  | PIWIL1    | 9.882626 | 4.573002 | 1.269277 | 3.602839 | 0.000315  | 0.001132  | 0        | 1.642235 | 0.695731 | 11.16063 | 42.78221 | 3.014938 |
| 8948  | LOC103221 | 8.141774 | 4.57092  | 1.459152 | 3.132587 | 0.001733  | 0.005148  | 0        | 0        | 2.087194 | 20.08914 | 25.66933 | 1.004979 |
| 6554  | CXCL13    | 10.63023 | 4.56852  | 1.166313 | 3.917063 | 8.96E-05  | 0.000364  | 0        | 0        | 2.782925 | 17.85702 | 32.08666 | 11.05477 |
| 5906  | WDR72     | 10.20505 | 4.568223 | 1.085225 | 4.20947  | 2.56E-05  | 0.000115  | 0.542086 | 0        | 2.087194 | 17.85702 | 25.66933 | 15.07469 |
| 366   | GASK1B    | 159.9574 | 4.566475 | 0.281905 | 16.19862 | 5.16E-59  | 3.75E-57  | 15.17842 | 14.78012 | 8.348776 | 299.105  | 303.7537 | 318.5785 |
| 569   | FAM107A   | 178.5108 | 4.566013 | 0.3283   | 13.90805 | 5.66E-44  | 2.64E-42  | 8.673382 | 25.18094 | 9.044508 | 337.0512 | 344.3968 | 346.7179 |
| 5188  | MAS1      | 12.85712 | 4.564791 | 0.995258 | 4.58654  | 4.51E-06  | 2.31E-05  | 0.542086 | 0        | 2.782925 | 26.78552 | 29.94755 | 17.08465 |
| 7814  | LOC119621 | 7.754513 | 4.564627 | 1.318504 | 3.461976 | 0.000536  | 0.001824  | 0        | 0.547412 | 1.391463 | 22.32127 | 19.252   | 3.014938 |
| 7694  | URO1      | 7.42623  | 4.563891 | 1.305565 | 3.495721 | 0.000473  | 0.001634  | 0        | 1.094824 | 0.695731 | 8.928508 | 27.80844 | 6.029877 |
| 10088 | LOC119621 | 5.08694  | 4.56171  | 1.605891 | 2.84061  | 0.004503  | 0.011864  | 0        | 0.547412 | 0.695731 | 11.16063 | 17.11289 | 1.004979 |
| 7779  | NAA11     | 7.934684 | 4.561396 | 1.314299 | 3.470592 | 0.000519  | 0.001775  | 0        | 0        | 2.087194 | 26.78552 | 10.69555 | 8.039836 |
| 9402  | CBLN1     | 5.236106 | 4.561069 | 1.51701  | 3.006617 | 0.002642  | 0.007469  | 0        | 0        | 1.391463 | 11.16063 | 12.83466 | 6.029877 |
| 9403  | LYPD4     | 5.236106 | 4.561069 | 1.51701  | 3.006617 | 0.002642  | 0.007469  | 0        | 0        | 1.391463 | 11.16063 | 12.83466 | 6.029877 |
| 9630  | LOC119621 | 5.288637 | 4.560747 | 1.544418 | 2.953051 | 0.003146  | 0.008686  | 0        | 0        | 1.391463 | 15.62489 | 10.69555 | 4.019918 |
| 6359  | SCN10A    | 10.01027 | 4.560582 | 1.139865 | 4.000984 | 6.31E-05  | 0.000264  | 0        | 1.094824 | 1.391463 | 11.16063 | 36.36488 | 10.04979 |
| 12274 | IGFL3     | 2.593517 | 4.560019 | 1.940447 | 2.349984 | 0.018774  | 0.040664  | 0        | 0        | 0.695731 | 6.696381 | 2.139111 | 6.029877 |
| 9580  | CCDC105   | 5.049912 | 4.559875 | 1.537648 | 2.965487 | 0.003022  | 0.008386  | 0        | 0.547412 | 0.695731 | 8.928508 | 17.11289 | 3.014938 |
| 9690  | HTR3E     | 5.033522 | 4.559494 | 1.554057 | 2.933929 | 0.003347  | 0.009183  | 0.542086 | 0        | 0.695731 | 6.696381 | 19.252   | 3.014938 |
| 203   | DOK5      | 250.4927 | 4.557519 | 0.226442 | 20.12667 | 4.31E-90  | 5.66E-88  | 21.14137 | 22.44388 | 17.39328 | 466.5145 | 459.9088 | 515.5545 |
| 9692  | P2RY14    | 5.03441  | 4.556779 |          |          |           |           |          |          |          |          |          |          |



|       |           |          |          |          |          |          |          |          |          |          |          |          |          |
|-------|-----------|----------|----------|----------|----------|----------|----------|----------|----------|----------|----------|----------|----------|
| 9484  | FAM217A   | 5.220604 | 4.556722 | 1.5249   | 2.98821  | 0.002806 | 0.007866 | 0        | 0        | 1.391463 | 8.928508 | 14.97377 | 6.029877 |
| 7335  | CDA       | 7.139062 | 4.556571 | 1.25872  | 3.620004 | 0.000295 | 0.001068 | 0        | 1.094824 | 0.695731 | 13.39276 | 8.556443 | 19.09461 |
| 7703  | KBTBD12   | 7.54439  | 4.55534  | 1.30429  | 3.492583 | 0.000478 | 0.001651 | 0        | 0.547412 | 1.391463 | 4.464254 | 27.80844 | 11.05477 |
| 13510 | LOC119624 | 2.689098 | 4.553963 | 2.163072 | 2.105323 | 0.035263 | 0.069371 | 0        | 0        | 0.695731 | 11.16063 | 4.278221 | 0        |
| 4920  | DSCAM     | 15.53763 | 4.553753 | 0.96204  | 4.733433 | 2.21E-06 | 1.19E-05 | 0        | 0.547412 | 3.478657 | 33.4819  | 40.6431  | 15.07469 |
| 6749  | HNFI1A    | 10.31268 | 4.552323 | 1.18613  | 3.837965 | 0.000124 | 0.000489 | 0.542086 | 0        | 2.087194 | 17.85702 | 36.36488 | 5.024897 |
| 9633  | LOC10323: | 5.205101 | 4.551358 | 1.541637 | 2.952289 | 0.003154 | 0.008704 | 0        | 0        | 1.391463 | 6.696381 | 17.11289 | 6.029877 |
| 9634  | CD300LF   | 5.205101 | 4.551358 | 1.541637 | 2.952289 | 0.003154 | 0.008704 | 0        | 0        | 1.391463 | 6.696381 | 17.11289 | 6.029877 |
| 12553 | NEU2      | 2.667573 | 4.551174 | 1.985261 | 2.292482 | 0.021878 | 0.04633  | 0        | 0        | 0.695731 | 11.16063 | 2.139111 | 2.009959 |
| 12554 | LOC10322: | 2.667573 | 4.551174 | 1.985261 | 2.292482 | 0.021878 | 0.04633  | 0        | 0        | 0.695731 | 11.16063 | 2.139111 | 2.009959 |
| 5625  | CCDC190   | 15.94039 | 4.549544 | 1.043093 | 4.36159  | 1.29E-05 | 6.10E-05 | 0        | 0        | 4.174388 | 33.4819  | 44.92132 | 13.06473 |
| 12130 | LOC11961: | 2.615042 | 4.5469   | 1.911553 | 2.378643 | 0.017377 | 0.038052 | 0        | 0        | 0.695731 | 6.696381 | 4.278221 | 4.019918 |
| 12140 | HES3      | 2.615042 | 4.5469   | 1.911553 | 2.378643 | 0.017377 | 0.038052 | 0        | 0        | 0.695731 | 6.696381 | 4.278221 | 4.019918 |
| 11979 | LOC11962: | 25.03461 | 4.546617 | 1.886707 | 2.409817 | 0.015961 | 0.035421 | 0        | 0        | 6.261582 | 49.10679 | 72.72976 | 22.10955 |
| 13481 | LOC11961: | 2.648875 | 4.545837 | 2.153493 | 2.110913 | 0.03478  | 0.068587 | 0        | 0.547412 | 0        | 8.928508 | 6.417332 | 0        |
| 13457 | LRIT2     | 2.673595 | 4.545504 | 2.14835  | 2.115811 | 0.034361 | 0.067872 | 0        | 0        | 0.695731 | 8.928508 | 6.417332 | 0        |
| 13458 | LOC11961: | 2.673595 | 4.545504 | 2.14835  | 2.115811 | 0.034361 | 0.067872 | 0        | 0        | 0.695731 | 8.928508 | 6.417332 | 0        |
| 13459 | LOC10323: | 2.673595 | 4.545504 | 2.14835  | 2.115811 | 0.034361 | 0.067872 | 0        | 0        | 0.695731 | 8.928508 | 6.417332 | 0        |
| 12364 | LINC02843 | 2.626462 | 4.542029 | 1.950113 | 2.32911  | 0.019853 | 0.042688 | 0.542086 | 0        | 0        | 8.928508 | 4.278221 | 2.009959 |
| 12362 | LOC119624 | 2.62735  | 4.542019 | 1.949961 | 2.329287 | 0.019844 | 0.042673 | 0        | 0.547412 | 0        | 8.928508 | 4.278221 | 2.009959 |
| 12191 | PTH2R     | 2.574819 | 4.540329 | 1.917527 | 2.367805 | 0.017894 | 0.039012 | 0        | 0.547412 | 0        | 4.464254 | 6.417332 | 4.019918 |
| 12192 | LOC11962: | 2.574819 | 4.540329 | 1.917527 | 2.367805 | 0.017894 | 0.039012 | 0        | 0.547412 | 0        | 4.464254 | 6.417332 | 4.019918 |
| 12194 | LOC10323: | 2.574819 | 4.540329 | 1.917527 | 2.367805 | 0.017894 | 0.039012 | 0        | 0.547412 | 0        | 4.464254 | 6.417332 | 4.019918 |
| 12164 | ADAM29    | 2.599539 | 4.540248 | 1.913188 | 2.373132 | 0.017638 | 0.038547 | 0        | 0        | 0.695731 | 4.464254 | 6.417332 | 4.019918 |
| 12165 | LOC103214 | 2.599539 | 4.540248 | 1.913188 | 2.373132 | 0.017638 | 0.038547 | 0        | 0        | 0.695731 | 4.464254 | 6.417332 | 4.019918 |
| 13511 | LOC11962: | 2.633373 | 4.538454 | 2.155722 | 2.105306 | 0.035265 | 0.069371 | 0        | 0.547412 | 0        | 6.696381 | 8.556443 | 0        |
| 13512 | LOC11962: | 2.633373 | 4.538454 | 2.155722 | 2.105306 | 0.035265 | 0.069371 | 0        | 0.547412 | 0        | 6.696381 | 8.556443 | 0        |
| 13514 | LOC10323: | 2.633373 | 4.538454 | 2.155722 | 2.105306 | 0.035265 | 0.069371 | 0        | 0.547412 | 0        | 6.696381 | 8.556443 | 0        |
| 6637  | TMEM125   | 9.947831 | 4.537022 | 1.168115 | 3.884053 | 0.000103 | 0.000411 | 0        | 1.094824 | 1.391463 | 20.08914 | 32.08666 | 5.024897 |
| 4482  | GPR141    | 17.89473 | 4.535666 | 0.903215 | 5.021693 | 5.12E-07 | 3.04E-06 | 0.542086 | 0        | 4.174388 | 33.4819  | 47.06043 | 22.10955 |
| 12335 | LOC11962: | 2.611847 | 4.534494 | 1.940614 | 2.336629 | 0.019458 | 0.041928 | 0        | 0.547412 | 0        | 6.696381 | 6.417332 | 2.009959 |
| 12336 | LOC11962: | 2.611847 | 4.534494 | 1.940614 | 2.336629 | 0.019458 | 0.041928 | 0        | 0.547412 | 0        | 6.696381 | 6.417332 | 2.009959 |
| 12321 | CALHM6    | 2.636567 | 4.53423  | 1.936375 | 2.341608 | 0.019201 | 0.041423 | 0        | 0        | 0.695731 | 6.696381 | 6.417332 | 2.009959 |
| 12322 | LIPJ      | 2.636567 | 4.53423  | 1.936375 | 2.341608 | 0.019201 | 0.041423 | 0        | 0        | 0.695731 | 6.696381 | 6.417332 | 2.009959 |
| 12323 | LOC11962: | 2.636567 | 4.53423  | 1.936375 | 2.341608 | 0.019201 | 0.041423 | 0        | 0        | 0.695731 | 6.696381 | 6.417332 | 2.009959 |
| 8198  | LOC10324: | 7.293986 | 4.532586 | 1.354048 | 3.347432 | 0.000816 | 0.002645 | 1.084173 | 0        | 0.695731 | 11.16063 | 27.80844 | 3.014938 |
| 950   | SMIM5     | 71.93788 | 4.532175 | 0.40459  | 11.20189 | 3.99E-29 | 1.12E-27 | 4.878777 | 4.926706 | 8.348776 | 131.6955 | 156.1551 | 125.6224 |
| 13625 | LOC11962: | 2.61787  | 4.532049 | 2.174887 | 2.083808 | 0.037178 | 0.072541 | 0        | 0.547412 | 0        | 4.464254 | 10.69555 | 0        |
| 13602 | LOC11962: | 2.64259  | 4.531741 | 2.16966  | 2.088687 | 0.036736 | 0.0718   | 0        | 0        | 0.695731 | 4.464254 | 10.69555 | 0        |
| 16453 | LOC11962: | 1.28356  | 4.530288 | 2.870048 | 1.578471 | 0.114457 | 0.184796 | 0        | 0        | 0        | 6.696381 | 0        | 1.004979 |
| 16454 | LOC10324: | 1.28356  | 4.530288 | 2.870048 | 1.578471 | 0.114457 | 0.184796 | 0        | 0        | 0        | 6.696381 | 0        | 1.004979 |
| 16455 | LOC11962: | 1.28356  | 4.530288 | 2.870048 | 1.578471 | 0.114457 | 0.184796 | 0        | 0        | 0        | 6.696381 | 0        | 1.004979 |
| 16456 | LOC11962: | 1.28356  | 4.530288 | 2.870048 | 1.578471 | 0.114457 | 0.184796 | 0        | 0        | 0        | 6.696381 | 0        | 1.004979 |
| 16457 | LOC10321: | 1.28356  | 4.530288 | 2.870048 | 1.578471 | 0.114457 | 0.184796 | 0        | 0        | 0        | 6.696381 | 0        | 1.004979 |
| 16458 | ACOD1     | 1.28356  | 4.530288 | 2.870048 | 1.578471 | 0.114457 | 0.184796 | 0        | 0        | 0        | 6.696381 | 0        | 1.004979 |
| 16459 | LOC11962: | 1.28356  | 4.530288 | 2.870048 | 1.578471 | 0.114457 | 0.184796 | 0        | 0        | 0        | 6.696381 | 0        | 1.004979 |
| 16460 | WFDC5     | 1.28356  | 4.530288 | 2.870048 | 1.578471 | 0.114457 | 0.184796 | 0        | 0        | 0        | 6.696381 | 0        | 1.004979 |
| 16462 | NDN       | 1.28356  | 4.530288 | 2.870048 | 1.578471 | 0.114457 | 0.184796 | 0        | 0        | 0        | 6.696381 | 0        | 1.004979 |
| 16463 | LOC11962: | 1.28356  | 4.530288 | 2.870048 | 1.578471 | 0.114457 | 0.184796 | 0        | 0        | 0        | 6.696381 | 0        | 1.004979 |
| 16464 | SLOC1B1   | 1.28356  | 4.530288 | 2.870048 | 1.578471 | 0.114457 | 0.184796 | 0        | 0        | 0        | 6.696381 | 0        | 1.004979 |
| 16466 | LOC10323: | 1.28356  | 4.530288 | 2.870048 | 1.578471 | 0.114457 | 0.184796 | 0        | 0        | 0        | 6.696381 | 0        | 1.004979 |
| 9971  | THSD7B    | 4.660876 | 4.529919 | 1.578512 | 2.86974  | 0.004108 | 0.010953 | 1.084173 | 0        | 0        | 11.16063 | 10.69555 | 5.024897 |
| 12411 | LOC10321: | 2.595457 | 4.528301 | 1.953432 | 2.318125 | 0.020443 | 0.043789 | 0.542086 | 0        | 0        | 4.464254 | 8.556443 | 2.009959 |
| 12410 | TXLNB     | 2.596345 | 4.528292 | 1.953277 | 2.318305 | 0.020433 | 0.043772 | 0        | 0.547412 | 0        | 4.464254 | 8.556443 | 2.009959 |
| 13841 | LOC11962: | 2.627087 | 4.52676  | 2.217374 | 2.041496 | 0.041202 | 0.079138 | 0        | 0        | 0.695731 | 2.232127 | 12.83466 | 0        |
| 7640  | LOC11962: | 7.257846 | 4.52612  | 1.288646 | 3.512305 | 0.000444 | 0.001546 | 0.542086 | 0.547412 | 0.695731 | 8.928508 | 27.80844 | 5.024897 |
| 16348 | LOC11961: | 1.246532 | 4.525825 | 2.835755 | 1.595986 | 0.110492 | 0.17967  | 0        | 0        | 0        | 4.464254 | 0        | 3.014938 |
| 16349 | LOC11962: | 1.246532 | 4.525825 | 2.835755 | 1.595986 | 0.110492 | 0.17967  | 0        | 0        | 0        | 4.464254 | 0        | 3.014938 |
| 12674 | LOC10323: | 2.580842 | 4.523515 | 1.996422 | 2.265811 | 0.023463 | 0.049216 | 0        | 0.547412 | 0        | 2.232127 | 10.69555 | 2.009959 |
| 12650 | LOC10324: | 2.605562 | 4.523301 | 1.992029 | 2.2707   | 0.023165 | 0.04868  | 0        | 0        | 0.695731 | 2.232127 | 10.69555 | 2.009959 |
| 12651 | LOC11962: | 2.605562 | 4.523301 | 1.992029 | 2.2707   | 0.023165 | 0.04868  | 0        | 0        | 0.695731 | 2.232127 | 10.69555 | 2.009959 |
| 7928  | TMEM212   | 7.751685 | 4.523063 | 1.318366 | 3.43081  | 0.000602 | 0.002018 | 0        | 0        | 2.087194 | 24.5534  | 12.83466 | 7.034856 |
| 13590 | LOC10322: | 2.590059 | 4.522681 | 2.162348 | 2.09156  | 0.036478 | 0.071359 | 0        | 0        | 0.695731 | 0        | 12.83466 | 2.009959 |
| 6312  | GRM6      | 13.06185 | 4.522424 | 1.124681 | 4.021073 | 5.79E-05 | 0.000244 | 0        | 0        | 3.478657 | 40.17829 | 25.66933 | 9.044815 |
| 9611  | DUSP26    | 5.062587 | 4.514739 | 1.52602  | 2.958505 | 0.003091 | 0.008551 | 0        | 0        | 1.391463 | 13.39276 | 8.556443 | 7.034856 |
| 15470 | OOSP2     | 1.231029 | 4.513898 | 2.580142 | 1.749477 | 0.080209 | 0.137784 | 0        | 0        | 0        | 2.232127 | 2.139111 | 3.014938 |
| 15471 | LOC103234 | 1.231029 | 4.513898 | 2.580142 | 1.749477 | 0.080209 | 0.137784 | 0        | 0        | 0        | 2.232127 | 2.139111 | 3.014938 |
| 15472 | LOC11962: | 1.231029 | 4.513898 | 2.580142 | 1.749477 | 0.080209 | 0.137784 | 0        | 0        | 0        | 2.232127 | 2.139111 | 3.014938 |
| 15473 | LOC11962: | 1.231029 | 4.513898 | 2.580142 | 1.749477 | 0.080209 | 0.137784 | 0        | 0        | 0        | 2.232127 | 2.139111 | 3.014938 |
| 15474 | PPP1R3A   | 1.231029 | 4.513898 | 2.580142 | 1.749477 | 0.080209 | 0.137784 | 0        | 0        | 0        | 2.232127 | 2.139111 | 3.014938 |
| 15475 | LOC10323: | 1.231029 | 4.513898 | 2.580142 | 1.749477 | 0.080209 | 0.137784 | 0        | 0        | 0        | 2.232127 | 2.139111 | 3.014938 |
| 15476 | LOC11962: | 1.231029 | 4.513898 | 2.580142 | 1.749477 | 0.080209 | 0.137784 | 0        | 0        | 0        | 2.232127 | 2.139111 | 3.014938 |
| 7275  | ZNF610    | 7.118789 | 4.512067 | 1.239289 | 3.640853 | 0.000272 | 0.000993 | 0.542086 | 0.547412 | 0.695731 | 22.32127 | 8.556443 | 10.04979 |
| 9748  | LOC119624 | 5.099615 | 4.510984 | 1.546092 | 2.91767  | 0.003527 | 0.009618 | 0        | 0        | 1.391463 | 15.62489 | 8.556443 | 5.024897 |



|       |           |          |          |          |          |          |          |          |          |          |          |          |          |
|-------|-----------|----------|----------|----------|----------|----------|----------|----------|----------|----------|----------|----------|----------|
| 9903  | LOC103227 | 4.913421 | 4.510736 | 1.563806 | 2.884461 | 0.003921 | 0.010526 | 0        | 0.547412 | 0.695731 | 13.39276 | 12.83466 | 2.009959 |
| 15524 | LOC103238 | 1.268057 | 4.507539 | 2.593554 | 1.737977 | 0.082215 | 0.140667 | 0        | 0        | 0        | 4.464254 | 2.139111 | 1.004979 |
| 15525 | LOC119624 | 1.268057 | 4.507539 | 2.593554 | 1.737977 | 0.082215 | 0.140667 | 0        | 0        | 0        | 4.464254 | 2.139111 | 1.004979 |
| 15526 | LOC103240 | 1.268057 | 4.507539 | 2.593554 | 1.737977 | 0.082215 | 0.140667 | 0        | 0        | 0        | 4.464254 | 2.139111 | 1.004979 |
| 15527 | LOC103240 | 1.268057 | 4.507539 | 2.593554 | 1.737977 | 0.082215 | 0.140667 | 0        | 0        | 0        | 4.464254 | 2.139111 | 1.004979 |
| 15528 | LOC103240 | 1.268057 | 4.507539 | 2.593554 | 1.737977 | 0.082215 | 0.140667 | 0        | 0        | 0        | 4.464254 | 2.139111 | 1.004979 |
| 15529 | LOC119626 | 1.268057 | 4.507539 | 2.593554 | 1.737977 | 0.082215 | 0.140667 | 0        | 0        | 0        | 4.464254 | 2.139111 | 1.004979 |
| 15530 | LOC119626 | 1.268057 | 4.507539 | 2.593554 | 1.737977 | 0.082215 | 0.140667 | 0        | 0        | 0        | 4.464254 | 2.139111 | 1.004979 |
| 15531 | LOC119618 | 1.268057 | 4.507539 | 2.593554 | 1.737977 | 0.082215 | 0.140667 | 0        | 0        | 0        | 4.464254 | 2.139111 | 1.004979 |
| 15532 | LOC119618 | 1.268057 | 4.507539 | 2.593554 | 1.737977 | 0.082215 | 0.140667 | 0        | 0        | 0        | 4.464254 | 2.139111 | 1.004979 |
| 15533 | LOC103230 | 1.268057 | 4.507539 | 2.593554 | 1.737977 | 0.082215 | 0.140667 | 0        | 0        | 0        | 4.464254 | 2.139111 | 1.004979 |
| 15534 | LOC119620 | 1.268057 | 4.507539 | 2.593554 | 1.737977 | 0.082215 | 0.140667 | 0        | 0        | 0        | 4.464254 | 2.139111 | 1.004979 |
| 15535 | LOC103230 | 1.268057 | 4.507539 | 2.593554 | 1.737977 | 0.082215 | 0.140667 | 0        | 0        | 0        | 4.464254 | 2.139111 | 1.004979 |
| 15536 | LOC119620 | 1.268057 | 4.507539 | 2.593554 | 1.737977 | 0.082215 | 0.140667 | 0        | 0        | 0        | 4.464254 | 2.139111 | 1.004979 |
| 15537 | KRTAP27-1 | 1.268057 | 4.507539 | 2.593554 | 1.737977 | 0.082215 | 0.140667 | 0        | 0        | 0        | 4.464254 | 2.139111 | 1.004979 |
| 15538 | LOC119620 | 1.268057 | 4.507539 | 2.593554 | 1.737977 | 0.082215 | 0.140667 | 0        | 0        | 0        | 4.464254 | 2.139111 | 1.004979 |
| 16611 | LOC119620 | 1.194001 | 4.506043 | 2.895913 | 1.556001 | 0.119708 | 0.191551 | 0        | 0        | 0        | 0        | 2.139111 | 5.024897 |
| 16612 | FIGLA     | 1.194001 | 4.506043 | 2.895913 | 1.556001 | 0.119708 | 0.191551 | 0        | 0        | 0        | 0        | 2.139111 | 5.024897 |
| 16613 | DUXB      | 1.194001 | 4.506043 | 2.895913 | 1.556001 | 0.119708 | 0.191551 | 0        | 0        | 0        | 0        | 2.139111 | 5.024897 |
| 16614 | LOC119620 | 1.194001 | 4.506043 | 2.895913 | 1.556001 | 0.119708 | 0.191551 | 0        | 0        | 0        | 0        | 2.139111 | 5.024897 |
| 7179  | OR52A1    | 10.30126 | 4.505869 | 1.227226 | 3.671587 | 0.000241 | 0.000893 | 0        | 0        | 2.782925 | 15.62489 | 36.36488 | 7.034856 |
| 10018 | NEUROD4   | 5.121141 | 4.503927 | 1.576359 | 2.857117 | 0.004274 | 0.011343 | 0        | 0        | 1.391463 | 15.62489 | 10.69555 | 3.014938 |
| 5341  | LOC103240 | 12.32797 | 4.502163 | 1.001729 | 4.49439  | 6.98E-06 | 3.47E-05 | 0        | 0.547412 | 2.782925 | 29.01765 | 23.53022 | 18.08963 |
| 7615  | TOX2      | 7.370447 | 4.501395 | 1.2784   | 3.521117 | 0.00043  | 0.0015   | 0        | 0.547412 | 1.391463 | 24.5534  | 10.69555 | 7.034856 |
| 10005 | CD248     | 5.105638 | 4.500352 | 1.573626 | 2.859862 | 0.004238 | 0.011262 | 0        | 0        | 1.391463 | 13.39276 | 12.83466 | 3.014938 |
| 6463  | CCL24     | 9.396531 | 4.500277 | 1.138003 | 3.954539 | 7.67E-05 | 0.000315 | 0        | 1.642235 | 0.695731 | 29.01765 | 14.97377 | 10.04979 |
| 9780  | PIRT      | 5.053107 | 4.499892 | 1.54685  | 2.909067 | 0.003625 | 0.009852 | 0        | 0        | 1.391463 | 8.928508 | 14.97377 | 5.024897 |
| 7534  | ESR2      | 7.354944 | 4.499069 | 1.268191 | 3.547627 | 0.000389 | 0.001372 | 0        | 0.547412 | 1.391463 | 22.32127 | 12.83466 | 7.034856 |
| 8386  | LOC119615 | 1.756911 | 4.497955 | 1.36842  | 3.28697  | 0.001013 | 0.00321  | 0        | 0        | 2.087194 | 4.464254 | 27.80844 | 11.05477 |
| 16474 | GIMD1     | 1.215527 | 4.496686 | 2.852771 | 1.576252 | 0.114968 | 0.185488 | 0        | 0        | 0        | 0        | 4.278221 | 3.014938 |
| 16476 | LOC103220 | 1.215527 | 4.496686 | 2.852771 | 1.576252 | 0.114968 | 0.185488 | 0        | 0        | 0        | 0        | 4.278221 | 3.014938 |
| 16484 | LOC119620 | 1.215527 | 4.496686 | 2.852771 | 1.576252 | 0.114968 | 0.185488 | 0        | 0        | 0        | 0        | 4.278221 | 3.014938 |
| 16485 | LOC119620 | 1.215527 | 4.496686 | 2.852771 | 1.576252 | 0.114968 | 0.185488 | 0        | 0        | 0        | 0        | 4.278221 | 3.014938 |
| 16494 | LOC119620 | 1.215527 | 4.496686 | 2.852771 | 1.576252 | 0.114968 | 0.185488 | 0        | 0        | 0        | 0        | 4.278221 | 3.014938 |
| 9951  | LOC119626 | 5.037604 | 4.494596 | 1.563567 | 2.874578 | 0.004046 | 0.010808 | 0        | 0        | 1.391463 | 6.696381 | 17.11289 | 5.024897 |
| 15616 | LOC119624 | 1.252555 | 4.493556 | 2.602035 | 1.726939 | 0.084179 | 0.143097 | 0        | 0        | 0        | 2.232127 | 4.278221 | 1.004979 |
| 15617 | INS       | 1.252555 | 4.493556 | 2.602035 | 1.726939 | 0.084179 | 0.143097 | 0        | 0        | 0        | 2.232127 | 4.278221 | 1.004979 |
| 15618 | TAAR6     | 1.252555 | 4.493556 | 2.602035 | 1.726939 | 0.084179 | 0.143097 | 0        | 0        | 0        | 2.232127 | 4.278221 | 1.004979 |
| 15619 | LOC119620 | 1.252555 | 4.493556 | 2.602035 | 1.726939 | 0.084179 | 0.143097 | 0        | 0        | 0        | 2.232127 | 4.278221 | 1.004979 |
| 15620 | CLDN20    | 1.252555 | 4.493556 | 2.602035 | 1.726939 | 0.084179 | 0.143097 | 0        | 0        | 0        | 2.232127 | 4.278221 | 1.004979 |
| 15622 | LOC119620 | 1.252555 | 4.493556 | 2.602035 | 1.726939 | 0.084179 | 0.143097 | 0        | 0        | 0        | 2.232127 | 4.278221 | 1.004979 |
| 15623 | LOC119620 | 1.252555 | 4.493556 | 2.602035 | 1.726939 | 0.084179 | 0.143097 | 0        | 0        | 0        | 2.232127 | 4.278221 | 1.004979 |
| 15624 | LOC103220 | 1.252555 | 4.493556 | 2.602035 | 1.726939 | 0.084179 | 0.143097 | 0        | 0        | 0        | 2.232127 | 4.278221 | 1.004979 |
| 15626 | LOC119618 | 1.252555 | 4.493556 | 2.602035 | 1.726939 | 0.084179 | 0.143097 | 0        | 0        | 0        | 2.232127 | 4.278221 | 1.004979 |
| 15627 | PTCHD3    | 1.252555 | 4.493556 | 2.602035 | 1.726939 | 0.084179 | 0.143097 | 0        | 0        | 0        | 2.232127 | 4.278221 | 1.004979 |
| 15628 | LOC119618 | 1.252555 | 4.493556 | 2.602035 | 1.726939 | 0.084179 | 0.143097 | 0        | 0        | 0        | 2.232127 | 4.278221 | 1.004979 |
| 15629 | LOC103230 | 1.252555 | 4.493556 | 2.602035 | 1.726939 | 0.084179 | 0.143097 | 0        | 0        | 0        | 2.232127 | 4.278221 | 1.004979 |
| 15630 | LOC119620 | 1.252555 | 4.493556 | 2.602035 | 1.726939 | 0.084179 | 0.143097 | 0        | 0        | 0        | 2.232127 | 4.278221 | 1.004979 |
| 15631 | VGLL1     | 1.252555 | 4.493556 | 2.602035 | 1.726939 | 0.084179 | 0.143097 | 0        | 0        | 0        | 2.232127 | 4.278221 | 1.004979 |
| 15633 | ZG16      | 1.252555 | 4.493556 | 2.602035 | 1.726939 | 0.084179 | 0.143097 | 0        | 0        | 0        | 2.232127 | 4.278221 | 1.004979 |
| 15634 | KRTAP11-1 | 1.252555 | 4.493556 | 2.602035 | 1.726939 | 0.084179 | 0.143097 | 0        | 0        | 0        | 2.232127 | 4.278221 | 1.004979 |
| 15635 | LOC103234 | 1.252555 | 4.493556 | 2.602035 | 1.726939 | 0.084179 | 0.143097 | 0        | 0        | 0        | 2.232127 | 4.278221 | 1.004979 |
| 15636 | LOC119620 | 1.252555 | 4.493556 | 2.602035 | 1.726939 | 0.084179 | 0.143097 | 0        | 0        | 0        | 2.232127 | 4.278221 | 1.004979 |
| 15638 | NKX2-4    | 1.252555 | 4.493556 | 2.602035 | 1.726939 | 0.084179 | 0.143097 | 0        | 0        | 0        | 2.232127 | 4.278221 | 1.004979 |
| 3921  | LOC119620 | 21.795   | 4.492993 | 0.827529 | 5.429407 | 5.65E-08 | 3.83E-07 | 1.626259 | 0.547412 | 3.478657 | 46.87467 | 64.17332 | 14.06971 |
| 7576  | LOC103230 | 7.181849 | 4.492846 | 1.271417 | 3.533731 | 0.00041  | 0.001438 | 0        | 0.547412 | 1.391463 | 6.696381 | 21.39111 | 13.06473 |
| 7705  | TGM7      | 7.344576 | 4.491933 | 1.28648  | 3.491646 | 0.00048  | 0.001656 | 0.542086 | 0        | 1.391463 | 17.85702 | 19.252   | 5.024897 |
| 12105 | FAM135B   | 26.84104 | 4.491302 | 1.882811 | 2.385423 | 0.017059 | 0.037466 | 0        | 0        | 6.957314 | 51.33892 | 70.59065 | 32.15934 |
| 7087  | PLD5      | 9.674849 | 4.489334 | 1.212857 | 3.701452 | 0.000214 | 0.000804 | 0        | 1.094824 | 1.391463 | 29.01765 | 23.53022 | 3.014938 |
| 8144  | LOC119620 | 7.054209 | 4.488324 | 1.333325 | 3.366263 | 0.000762 | 0.002487 | 0        | 1.094824 | 0.695731 | 6.696381 | 27.80844 | 6.029877 |
| 16659 | LOC119620 | 1.237052 | 4.485991 | 2.901658 | 1.546009 | 0.122102 | 0.194691 | 0        | 0        | 0        | 0        | 6.417332 | 1.004979 |
| 16660 | LOC103230 | 1.237052 | 4.485991 | 2.901658 | 1.546009 | 0.122102 | 0.194691 | 0        | 0        | 0        | 0        | 6.417332 | 1.004979 |
| 16661 | LOC119624 | 1.237052 | 4.485991 | 2.901658 | 1.546009 | 0.122102 | 0.194691 | 0        | 0        | 0        | 0        | 6.417332 | 1.004979 |
| 16662 | CLRN1     | 1.237052 | 4.485991 | 2.901658 | 1.546009 | 0.122102 | 0.194691 | 0        | 0        | 0        | 0        | 6.417332 | 1.004979 |
| 16663 | TAS2R16   | 1.237052 | 4.485991 | 2.901658 | 1.546009 | 0.122102 | 0.194691 | 0        | 0        | 0        | 0        | 6.417332 | 1.004979 |
| 16664 | LOC103220 | 1.237052 | 4.485991 | 2.901658 | 1.546009 | 0.122102 | 0.194691 | 0        | 0        | 0        | 0        | 6.417332 | 1.004979 |
| 16665 | LOC119620 | 1.237052 | 4.485991 | 2.901658 | 1.546009 | 0.122102 | 0.194691 | 0        | 0        | 0        | 0        | 6.417332 | 1.004979 |
| 16666 | LOC119620 | 1.237052 | 4.485991 | 2.901658 | 1.546009 | 0.122102 | 0.194691 | 0        | 0        | 0        | 0        | 6.417332 | 1.004979 |
| 16667 | LOC119618 | 1.237052 | 4.485991 | 2.901658 | 1.546009 | 0.122102 | 0.194691 | 0        | 0        | 0        | 0        | 6.417332 | 1.004979 |
| 16668 | CPB2      | 1.237052 | 4.485991 | 2.901658 | 1.546009 | 0.122102 | 0.194691 | 0        | 0        | 0        | 0        | 6.417332 | 1.004979 |
| 16669 | LOC103230 | 1.237052 | 4.485991 | 2.901658 | 1.546009 | 0.122102 | 0.194691 | 0        | 0        | 0        | 0        | 6.417332 | 1.004979 |
| 16670 | LOC119618 | 1.237052 | 4.485991 | 2.901658 | 1.546009 | 0.122102 | 0.194691 | 0        | 0        | 0        | 0        | 6.417332 | 1.004979 |
| 16672 | LOC119620 | 1.237052 | 4.485991 | 2.901658 | 1.546009 | 0.122102 | 0.194691 | 0        | 0        | 0        | 0        | 6.417332 | 1.004979 |
| 16673 | LOC103230 | 1.237052 | 4.485991 | 2.901658 | 1.546009 | 0.122102 | 0.194691 | 0        | 0        | 0        | 0        | 6.417332 | 1.004979 |



|       |          |          |          |          |          |          |          |          |          |          |          |          |            |
|-------|----------|----------|----------|----------|----------|----------|----------|----------|----------|----------|----------|----------|------------|
| 11909 | LOC10324 | 4.538206 | 4.485271 | 1.851233 | 2.422856 | 0.015399 | 0.034376 | 0        | 1.094824 | 0        | 11.16063 | 14.97377 | 0          |
| 4173  | LOC11962 | 16.37225 | 4.483355 | 0.854878 | 5.244437 | 1.57E-07 | 9.99E-07 | 1.626259 | 0        | 2.782925 | 24.5534  | 32.08666 | 37.18424   |
| 7823  | LRIT3    | 7.463624 | 4.481942 | 1.295443 | 3.459775 | 0.000541 | 0.001837 | 0        | 0        | 2.087194 | 13.39276 | 19.252   | 10.04979   |
| 5115  | LOC11962 | 14.80909 | 4.480823 | 0.969612 | 4.621254 | 3.81E-06 | 1.98E-05 | 0        | 0.547412 | 3.478657 | 31.24978 | 38.50399 | 15.07469   |
| 7922  | LOC11962 | 7.500652 | 4.480387 | 1.305391 | 3.432219 | 0.000599 | 0.002009 | 0        | 0        | 2.087194 | 15.62489 | 19.252   | 8.039836   |
| 7329  | GALNT5   | 10.14926 | 4.48001  | 1.236244 | 3.623887 | 0.00029  | 0.001053 | 0        | 0        | 2.782925 | 17.85702 | 34.22577 | 6.029877   |
| 5467  | CHL1     | 12.01131 | 4.479988 | 1.011271 | 4.430057 | 9.42E-06 | 4.58E-05 | 0        | 1.094824 | 2.087194 | 29.01765 | 27.80844 | 12.05975   |
| 10585 | RXFP4    | 5.006599 | 4.479303 | 1.643039 | 2.726231 | 0.006406 | 0.01609  | 0        | 0        | 1.391463 | 2.232127 | 21.39111 | 5.024897   |
| 10167 | SPRR3    | 4.471855 | 4.475787 | 1.586009 | 2.822044 | 0.004772 | 0.012478 | 1.084173 | 0        | 0        | 11.16063 | 8.556443 | 6.029877   |
| 8646  | GLRA3    | 6.772009 | 4.474907 | 1.391415 | 3.216084 | 0.0013   | 0.003996 | 0        | 1.642235 | 0        | 17.85702 | 17.11289 | 4.019918   |
| 6575  | CAPSL    | 9.69397  | 4.472087 | 1.143706 | 3.91017  | 9.22E-05 | 0.000373 | 0        | 0.547412 | 2.087194 | 13.39276 | 32.08666 | 10.04979   |
| 10346 | LOC10322 | 4.510658 | 4.470318 | 1.609458 | 2.77753  | 0.005477 | 0.014075 | 0        | 1.094824 | 0        | 13.39276 | 8.556443 | 4.019918   |
| 8445  | LOC10322 | 7.543703 | 4.46971  | 1.366732 | 3.270363 | 0.001074 | 0.003381 | 0        | 0        | 2.087194 | 15.62489 | 23.53022 | 4.019918   |
| 9742  | PRKACG   | 4.717489 | 4.469303 | 1.531329 | 2.918577 | 0.003516 | 0.009596 | 0.542086 | 0        | 0.695731 | 15.62489 | 6.417332 | 5.024897   |
| 4183  | FFAR4    | 22.00078 | 4.467648 | 0.853077 | 5.237097 | 1.63E-07 | 1.04E-06 | 1.084173 | 0        | 4.87012  | 51.33892 | 55.61688 | 19.09461   |
| 5820  | LOC11962 | 14.81165 | 4.466311 | 1.047677 | 4.263062 | 2.02E-05 | 9.21E-05 | 0        | 0.547412 | 3.478657 | 22.32127 | 53.47777 | 9.044815   |
| 7512  | BSPH1    | 7.128894 | 4.466283 | 1.256496 | 3.554555 | 0.000379 | 0.00134  | 0        | 0.547412 | 1.391463 | 20.08914 | 10.69555 | 10.04979   |
| 9842  | LOC10324 | 4.836537 | 4.464453 | 1.541772 | 2.895664 | 0.003784 | 0.01022  | 0        | 0        | 1.391463 | 11.16063 | 6.417332 | 10.04979   |
| 6311  | GP1BA    | 15.21143 | 4.463931 | 1.110038 | 4.021423 | 5.78E-05 | 0.000244 | 0        | 0        | 4.174388 | 49.10679 | 29.94755 | 8.039836   |
| 7884  | HAPLN1   | 7.20295  | 4.462172 | 1.295044 | 3.445575 | 0.00057  | 0.001922 | 0        | 0.547412 | 1.391463 | 24.5534  | 10.69555 | 6.029877   |
| 9787  | LOC11962 | 4.858063 | 4.459842 | 1.533985 | 2.907357 | 0.003645 | 0.009901 | 0        | 0        | 1.391463 | 11.16063 | 8.556443 | 8.039836   |
| 7924  | LOC11962 | 6.964226 | 4.459233 | 1.299368 | 3.431849 | 0.000599 | 0.002011 | 0        | 1.094824 | 0.695731 | 17.85702 | 17.11289 | 5.024897   |
| 12817 | GABRA6   | 2.364272 | 4.456541 | 1.994126 | 2.234834 | 0.025428 | 0.052743 | 0        | 0.547412 | 0        | 4.464254 | 2.139111 | 7.034856   |
| 4793  | LMO3     | 19.68522 | 4.455488 | 0.924802 | 4.817777 | 1.45E-06 | 8.05E-06 | 0        | 0.547412 | 4.87012  | 35.71403 | 59.8951  | 17.08465   |
| 9922  | DDI1     | 4.708009 | 4.454876 | 1.547067 | 2.879563 | 0.003982 | 0.01067  | 0.542086 | 0        | 0.695731 | 11.16063 | 12.83466 | 3.014938   |
| 6218  | TDRD9    | 9.327347 | 4.454805 | 1.095357 | 4.066991 | 4.76E-05 | 0.000204 | 0.542086 | 0.547412 | 1.391463 | 15.62489 | 27.80844 | 10.04979   |
| 10208 | LOC10322 | 4.602948 | 4.452628 | 1.581891 | 2.814749 | 0.004882 | 0.012713 | 0.542086 | 0        | 0.695731 | 2.232127 | 17.11289 | 7.034856   |
| 10127 | HIGD2B   | 4.932119 | 4.452355 | 1.572415 | 2.831539 | 0.004632 | 0.012161 | 0        | 0        | 1.391463 | 15.62489 | 8.556443 | 4.019918   |
| 7242  | CYP11B2  | 9.907712 | 4.452306 | 1.218206 | 3.654807 | 0.000257 | 0.000945 | 0        | 0        | 2.782925 | 13.39276 | 34.22577 | 9.044815   |
| 4572  | LOC10324 | 16.46917 | 4.451995 | 0.897727 | 4.959187 | 7.08E-07 | 4.12E-06 | 0        | 1.642235 | 2.782925 | 31.24978 | 47.06043 | 16.07967   |
| 4096  | SLFN12L  | 18.89519 | 4.451992 | 0.840035 | 5.299772 | 1.16E-07 | 7.53E-07 | 0        | 1.642235 | 3.478657 | 37.94616 | 49.19955 | 21.10457   |
| 7809  | TAFT7L   | 7.125437 | 4.449241 | 1.284768 | 3.463069 | 0.000534 | 0.001818 | 0        | 0.547412 | 1.391463 | 13.39276 | 21.39111 | 6.029877   |
| 8193  | CR1L     | 7.379664 | 4.448055 | 1.328398 | 3.348435 | 0.000813 | 0.002637 | 0        | 0        | 2.087194 | 22.32127 | 12.83466 | 7.034856   |
| 3994  | LOC10322 | 26.50347 | 4.446834 | 0.826799 | 5.378375 | 7.52E-08 | 5.00E-07 | 0        | 1.642235 | 5.565851 | 53.57105 | 79.14709 | 19.09461   |
| 12619 | PYDC1    | 2.410517 | 4.443987 | 1.951476 | 2.277243 | 0.022772 | 0.047974 | 0        | 0        | 0.695731 | 4.464254 | 4.278221 | 5.024897   |
| 12646 | CCDC153  | 2.385797 | 4.443941 | 1.956373 | 2.271521 | 0.023115 | 0.048594 | 0        | 0.547412 | 0        | 4.464254 | 4.278221 | 5.024897   |
| 10146 | LOC11961 | 4.811555 | 4.443454 | 1.57197  | 2.826679 | 0.004703 | 0.012324 | 0        | 0        | 1.391463 | 4.464254 | 14.97377 | 8.039836   |
| 7006  | PNOC     | 9.827209 | 4.442948 | 1.190943 | 3.730615 | 0.000191 | 0.000725 | 0        | 0        | 2.782925 | 29.01765 | 17.11289 | 10.04979   |
| 5031  | LY6H     | 19.79133 | 4.442039 | 0.950584 | 4.672958 | 2.97E-06 | 1.57E-05 | 0        | 0        | 5.565851 | 35.71403 | 51.33866 | 26.12947   |
| 12788 | CTSG     | 2.395015 | 4.436568 | 1.979158 | 2.241644 | 0.024984 | 0.05194  | 0        | 0        | 0.695731 | 2.232127 | 6.417332 | 5.024897   |
| 11187 | LOC10323 | 4.668411 | 4.436557 | 1.716459 | 2.584714 | 0.009746 | 0.023161 | 0        | 0.547412 | 0.695731 | 2.232127 | 23.53022 | 1.004979   |
| 8402  | LILRB4   | 7.354681 | 4.435507 | 1.351319 | 3.282355 | 0.001029 | 0.003257 | 0        | 0        | 2.087194 | 15.62489 | 21.39111 | 5.024897   |
| 13753 | LOC10323 | 2.333267 | 4.43525  | 2.155592 | 2.057555 | 0.039633 | 0.076612 | 0        | 0.547412 | 0        | 0        | 6.417332 | 7.034856   |
| 4939  | LOC10323 | 16.64546 | 4.433986 | 0.939444 | 4.719797 | 2.36E-06 | 1.27E-05 | 0        | 1.094824 | 3.478657 | 46.87467 | 36.36488 | 12.05975   |
| 13110 | CUNH10r  | 2.459853 | 4.433711 | 2.028475 | 2.185736 | 0.028835 | 0.058468 | 0        | 0.547412 | 0        | 8.928508 | 4.278221 | 1.004979   |
| 13111 | LOC10324 | 2.459853 | 4.433711 | 2.028475 | 2.185736 | 0.028835 | 0.058468 | 0        | 0.547412 | 0        | 8.928508 | 4.278221 | 1.004979   |
| 4812  | VIT      | 16.3232  | 4.433674 | 0.922562 | 4.805827 | 1.54E-06 | 8.51E-06 | 0        | 1.642235 | 2.782925 | 31.24978 | 49.19955 | 13.06473   |
| 13081 | LOC11962 | 2.484573 | 4.433364 | 2.023761 | 2.190655 | 0.028477 | 0.057872 | 0        | 0        | 0.695731 | 8.928508 | 4.278221 | 1.004979   |
| 13082 | LOC11962 | 2.484573 | 4.433364 | 2.023761 | 2.190655 | 0.028477 | 0.057872 | 0        | 0        | 0.695731 | 8.928508 | 4.278221 | 1.004979   |
| 6931  | LOC10324 | 9.296805 | 4.431787 | 1.177508 | 3.7637   | 0.000167 | 0.000642 | 0        | 1.094824 | 1.391463 | 29.01765 | 19.252   | 5.024897   |
| 7976  | SULT4A1  | 6.784684 | 4.431511 | 1.296582 | 3.41784  | 0.000631 | 0.002104 | 0        | 1.094824 | 0.695731 | 22.32127 | 8.556443 | 8.039836   |
| 5784  | VAT1L    | 11.86251 | 4.429747 | 1.034199 | 4.283266 | 1.84E-05 | 8.47E-05 | 0        | 0.547412 | 2.782925 | 31.24978 | 23.53022 | 13.06473   |
| 12707 | LOC11962 | 2.407323 | 4.429063 | 1.962557 | 2.256781 | 0.024022 | 0.050257 | 0        | 0.547412 | 0        | 4.464254 | 6.417332 | 3.014938   |
| 12687 | LOC11962 | 2.432043 | 4.428898 | 1.957746 | 2.262244 | 0.023682 | 0.049614 | 0        | 0        | 0.695731 | 4.464254 | 6.417332 | 3.014938   |
| 12688 | LOC11962 | 2.432043 | 4.428898 | 1.957746 | 2.262244 | 0.023682 | 0.049614 | 0        | 0        | 0.695731 | 4.464254 | 6.417332 | 3.014938   |
| 12689 | LOC11962 | 2.432043 | 4.428898 | 1.957746 | 2.262244 | 0.023682 | 0.049614 | 0        | 0        | 0.695731 | 4.464254 | 6.417332 | 3.014938   |
| 12690 | IL36B    | 2.432043 | 4.428898 | 1.957746 | 2.262244 | 0.023682 | 0.049614 | 0        | 0        | 0.695731 | 4.464254 | 6.417332 | 3.014938   |
| 13742 | LOC11962 | 2.379512 | 4.427185 | 2.147714 | 2.061348 | 0.03927  | 0.075971 | 0        | 0        | 0.695731 | 0        | 8.556443 | 5.024897   |
| 10705 | GASK1A   | 4.891633 | 4.427176 | 1.645664 | 2.690207 | 0.007141 | 0.017734 | 0        | 0        | 1.391463 | 6.696381 | 19.252   | 2.009959   |
| 1262  | STC1     | 81.94153 | 4.426048 | 0.444037 | 9.967744 | 2.11E-23 | 4.44E-22 | 2.710432 | 7.116354 | 12.52316 | 124.9991 | 209.6328 | 134.6672   |
| 13077 | LOC11962 | 2.444351 | 4.425441 | 2.01975  | 2.191083 | 0.028446 | 0.05782  | 0        | 0.547412 | 0        | 6.696381 | 6.417332 | 1.004979   |
| 13050 | RHEX     | 2.469071 | 4.425095 | 2.014996 | 2.196081 | 0.028086 | 0.057212 | 0        | 0        | 0.695731 | 6.696381 | 6.417332 | 1.004979   |
| 13051 | MUC3A    | 2.469071 | 4.425095 | 2.014996 | 2.196081 | 0.028086 | 0.057212 | 0        | 0        | 0.695731 | 6.696381 | 6.417332 | 1.004979   |
| 5873  | CD1C     | 11.56178 | 4.423827 | 1.046132 | 4.228746 | 2.35E-05 | 0.000106 | 0        | 1.094824 | 2.087194 | 15.62489 | 38.50399 | 12.05975   |
| 608   | ACP5     | 116.7415 | 4.423687 | 0.32692  | 13.53141 | 1.02E-41 | 4.46E-40 | 11.38381 | 13.6853  | 5.565851 | 212.0521 | 224.6066 | 233.1552   |
| 12966 | PPP4R3C  | 2.39182  | 4.422897 | 2.001078 | 2.210256 | 0.027087 | 0.055535 | 0        | 0.547412 | 0        | 2.232127 | 8.556443 | 3.014938   |
| 12967 | LOC11962 | 2.39182  | 4.422897 | 2.001078 | 2.210256 | 0.027087 | 0.055535 | 0        | 0.547412 | 0        | 2.232127 | 8.556443 | 3.014938   |
| 12934 | LLCFC1   | 2.41654  | 4.422758 | 1.99615  | 2.215644 | 0.026716 | 0.054913 | 0        | 0        | 0.695731 | 2.232127 | 8.556443 | 3.014938   |
| 8155  | PLA2G2D  | 7.035454 | 4.42198  | 1.314569 | 3.363825 | 0.000769 | 0.002506 | 0        | 0.547412 | 1.391463 | 24.5534  | 10.69555 | 5.024897   |
| 3832  | FBN3     | 31.32336 | 4.4199   | 0.80188  | 5.511922 | 3.55E-08 | 2.46E-07 | 0.542086 | 0.547412 | 7.653045 | 55.80317 | 96.25998 | 27.13445   |
| 13179 | S100G    | 2.428848 | 4.41867  | 2.032439 | 2.174073 | 0.0297   | 0.059913 | 0        | 0.547412 | 0        | 4.464254 | 8.556443 | 1.004979   |
| 13158 | LOC11962 | 2.453568 | 4.418343 | 2.027634 | 2.179063 | 0.029327 | 0.059249 | 0        | 0        | 0.695731 | 4.464254 | 8.556443 | 1.004979   |
| 13159 | CUNH10r  | 2.453568 | 4.418343 | 2.027634 | 2.179063 | 0.029327 | 0.059249 | 0        | 0        | 0.695731 | 4.464254 | 8.556443 | 1.004979   |
| 10563 | BOD1L2   | 4.373279 | 4.417987 | 1.61823  | 2.730136 | 0.006331 | 0.015933 | 0.542086 | 0.547412 | 0        | 17.85702 | 4.278221 | 3.014938</ |



|       |           |          |          |          |          |          |          |          |          |          |          |          |          |
|-------|-----------|----------|----------|----------|----------|----------|----------|----------|----------|----------|----------|----------|----------|
| 10829 | HEMGN     | 4.358664 | 4.415912 | 1.656942 | 2.665097 | 0.007697 | 0.018895 | 0        | 1.094824 | 0        | 15.62489 | 6.417332 | 3.014938 |
| 7731  | LMX1A     | 6.899387 | 4.415392 | 1.267719 | 3.482942 | 0.000496 | 0.001705 | 0        | 0.547412 | 1.391463 | 11.16063 | 19.252   | 9.044815 |
| 8075  | SPINT1    | 7.101083 | 4.414077 | 1.301865 | 3.390581 | 0.000697 | 0.002296 | 0        | 0        | 2.087194 | 15.62489 | 12.83466 | 12.05975 |
| 14295 | LOC119621 | 2.422562 | 4.413913 | 2.249253 | 1.962391 | 0.049717 | 0.092461 | 0        | 0        | 0.695731 | 0        | 12.83466 | 1.004979 |
| 11279 | LOC119618 | 4.860628 | 4.413878 | 1.722659 | 2.562247 | 0.0104   | 0.024513 | 0        | 0        | 1.391463 | 2.232127 | 23.53022 | 2.009959 |
| 13404 | LOC119620 | 2.412458 | 4.413634 | 2.075432 | 2.126609 | 0.033453 | 0.066349 | 0.542086 | 0        | 0        | 2.232127 | 10.69555 | 1.004979 |
| 13375 | LOC119621 | 2.438065 | 4.413334 | 2.070352 | 2.131683 | 0.033033 | 0.065662 | 0        | 0        | 0.695731 | 2.232127 | 10.69555 | 1.004979 |
| 5506  | CUNH12or  | 16.91924 | 4.412478 | 1.00082  | 4.408864 | 1.04E-05 | 5.02E-05 | 0        | 0        | 4.87012  | 22.32127 | 49.19955 | 25.12449 |
| 5118  | SGCD      | 16.38495 | 4.409143 | 0.954325 | 4.62017  | 3.83E-06 | 1.99E-05 | 0        | 1.094824 | 3.478657 | 33.4819  | 49.19955 | 11.05477 |
| 7357  | KCNA6     | 9.665735 | 4.407987 | 1.219701 | 3.613992 | 0.000302 | 0.00109  | 0        | 0        | 2.782925 | 26.78552 | 21.39111 | 7.034856 |
| 6109  | LOC103217 | 11.25459 | 4.407075 | 1.070822 | 4.115599 | 3.86E-05 | 0.000168 | 0        | 1.642235 | 1.391463 | 20.08914 | 36.36488 | 8.039836 |
| 7490  | LOC119619 | 9.402028 | 4.405676 | 1.23531  | 3.566453 | 0.000362 | 0.001284 | 0        | 0.547412 | 2.087194 | 13.39276 | 36.36488 | 4.019918 |
| 8181  | LOC103214 | 6.942437 | 4.40567  | 1.314298 | 3.352109 | 0.000802 | 0.002606 | 0        | 0.547412 | 1.391463 | 11.16063 | 23.53022 | 5.024897 |
| 2003  | GIMAP7    | 38.70656 | 4.4006   | 0.551968 | 7.972557 | 1.55E-15 | 2.06E-14 | 2.168345 | 6.02153  | 2.087194 | 87.05295 | 70.59065 | 64.31869 |
| 4948  | GCGR      | 13.64076 | 4.396798 | 0.932698 | 4.714065 | 2.43E-06 | 1.30E-05 | 0        | 1.094824 | 2.782925 | 26.78552 | 32.08666 | 19.09461 |
| 7683  | LOC119620 | 9.104326 | 4.395811 | 1.256784 | 3.497667 | 0.000469 | 0.001624 | 0        | 1.094824 | 1.391463 | 22.32127 | 27.80844 | 2.009959 |
| 10120 | UGT3A1    | 4.675063 | 4.395574 | 1.551682 | 2.832781 | 0.004614 | 0.012122 | 0        | 0        | 1.391463 | 8.928508 | 10.69555 | 7.034856 |
| 6896  | GRIFIN    | 12.04179 | 4.394988 | 1.163487 | 3.777429 | 0.000158 | 0.000611 | 0        | 0        | 3.478657 | 20.08914 | 40.6431  | 8.039836 |
| 7436  | LOC119618 | 9.477138 | 4.394115 | 1.225362 | 3.585973 | 0.000336 | 0.001201 | 0        | 0        | 2.782925 | 8.928508 | 32.08666 | 13.06473 |
| 2349  | CHST4     | 34.36709 | 4.393    | 0.598342 | 7.341957 | 2.10E-13 | 2.38E-12 | 4.336691 | 1.642235 | 3.478657 | 37.94616 | 83.42532 | 75.37346 |
| 10226 | PRSS54    | 4.712091 | 4.392026 | 1.563735 | 2.808677 | 0.004975 | 0.012934 | 0        | 0        | 1.391463 | 11.16063 | 10.69555 | 5.024897 |
| 8807  | LOC103246 | 7.171682 | 4.391279 | 1.384338 | 3.172116 | 0.001513 | 0.004568 | 0        | 0        | 2.087194 | 13.39276 | 23.53022 | 4.019918 |
| 6530  | LOC103216 | 11.69669 | 4.391049 | 1.118224 | 3.926805 | 8.61E-05 | 0.00035  | 0.542086 | 0        | 2.782925 | 22.32127 | 38.50399 | 6.029877 |
| 7477  | LOC103225 | 12.10034 | 4.389951 | 1.229465 | 3.570619 | 0.000356 | 0.001266 | 0        | 0        | 3.478657 | 22.32127 | 42.78221 | 4.019918 |
| 11611 | LOC119620 | 4.547423 | 4.389562 | 1.761669 | 2.491707 | 0.012713 | 0.029108 | 0        | 0.547412 | 0.695731 | 8.928508 | 17.11289 | 0        |
| 10457 | MINAR1    | 4.525897 | 4.387369 | 1.592786 | 2.754524 | 0.005878 | 0.014943 | 0        | 0.547412 | 0.695731 | 8.928508 | 14.97377 | 2.009959 |
| 9310  | LOC119620 | 7.193207 | 4.384833 | 1.446649 | 3.031027 | 0.002437 | 0.006959 | 0        | 0        | 2.087194 | 13.39276 | 25.66933 | 2.009959 |
| 10578 | LOC103220 | 4.510395 | 4.383819 | 1.607213 | 2.727591 | 0.00638  | 0.016034 | 0        | 0.547412 | 0.695731 | 6.696381 | 17.11289 | 2.009959 |
| 4677  | LOC103224 | 21.18121 | 4.383303 | 0.894638 | 4.899529 | 9.61E-07 | 5.46E-06 | 0        | 0.547412 | 5.565851 | 62.49956 | 36.36488 | 22.10955 |
| 5067  | LOC103241 | 12.95339 | 4.382546 | 0.942224 | 4.651276 | 3.30E-06 | 1.73E-05 | 1.084173 | 1.642235 | 0.695731 | 29.01765 | 34.22577 | 11.05477 |
| 10391 | HTR3B     | 4.681086 | 4.382255 | 1.583238 | 2.767907 | 0.005642 | 0.014434 | 0        | 0        | 1.391463 | 6.696381 | 14.97377 | 5.024897 |
| 7098  | PLA2G5    | 9.080397 | 4.380451 | 1.185103 | 3.696262 | 0.000219 | 0.000819 | 0        | 0.547412 | 2.087194 | 6.696381 | 32.08666 | 13.06473 |
| 8235  | RHOH      | 6.592204 | 4.377089 | 1.31221  | 3.335662 | 0.000851 | 0.002747 | 0        | 1.094824 | 0.695731 | 15.62489 | 17.11289 | 5.024897 |
| 7247  | LOC119621 | 9.393177 | 4.375879 | 1.197567 | 3.653975 | 0.000258 | 0.000947 | 0        | 0        | 2.782925 | 17.85702 | 25.66933 | 10.04979 |
| 6617  | LOC103238 | 8.844705 | 4.374986 | 1.123129 | 3.895356 | 9.81E-05 | 0.000394 | 0        | 1.094824 | 1.391463 | 24.5534  | 14.97377 | 11.05477 |
| 6478  | SYNDIG1   | 8.792175 | 4.374692 | 1.108056 | 3.94808  | 7.88E-05 | 0.000323 | 0        | 1.094824 | 1.391463 | 20.08914 | 17.11289 | 13.06473 |
| 3     | VCAM1     | 18494.96 | 4.372594 | 0.088988 | 49.13691 | 0        | 0        | 1702.693 | 1748.433 | 1659.319 | 34089.04 | 33768    | 38002.29 |
| 6903  | NPSR1     | 9.094588 | 4.367833 | 1.156742 | 3.775977 | 0.000159 | 0.000614 | 0.542086 | 0        | 2.087194 | 26.78552 | 17.11289 | 8.039836 |
| 7244  | LOC103221 | 8.633529 | 4.367165 | 1.195128 | 3.65414  | 0.000258 | 0.000947 | 0        | 1.642235 | 0.695731 | 15.62489 | 27.80844 | 6.029877 |
| 4237  | LOC103241 | 23.03519 | 4.366787 | 0.840459 | 5.195715 | 2.04E-07 | 1.28E-06 | 0.542086 | 0.547412 | 5.565851 | 53.57105 | 59.8951  | 18.08963 |
| 6709  | LOC103230 | 11.54559 | 4.366614 | 1.133559 | 3.852127 | 0.000117 | 0.000464 | 0        | 0.547412 | 2.782925 | 24.5534  | 36.36488 | 5.024897 |
| 3162  | LOC119624 | 21.37026 | 4.366586 | 0.703962 | 6.202868 | 5.54E-10 | 4.66E-09 | 2.168345 | 1.094824 | 2.782925 | 46.87467 | 32.08666 | 43.21412 |
| 6442  | SYNDIG1L  | 14.21635 | 4.363793 | 1.10081  | 3.964166 | 7.37E-05 | 0.000304 | 0        | 0        | 4.174388 | 35.71403 | 36.36488 | 9.044815 |
| 8411  | RESP18    | 6.924107 | 4.362185 | 1.33051  | 3.278581 | 0.001043 | 0.003298 | 0        | 0        | 2.087194 | 11.16063 | 19.252   | 9.044815 |
| 9054  | LOC119619 | 7.066196 | 4.361104 | 1.40904  | 3.09509  | 0.001968 | 0.005777 | 0        | 0        | 2.087194 | 22.32127 | 14.97377 | 3.014938 |
| 3817  | IL25      | 27.36091 | 4.360616 | 0.788841 | 5.527874 | 3.24E-08 | 2.26E-07 | 0        | 1.642235 | 6.261582 | 66.96381 | 64.17332 | 25.12449 |
| 8274  | FABP12    | 6.123977 | 4.360079 | 1.312763 | 3.321299 | 0.000896 | 0.002879 | 0.542086 | 1.094824 | 0        | 15.62489 | 6.417332 | 13.06473 |
| 2415  | NR0B1     | 33.22953 | 4.359982 | 0.601288 | 7.25107  | 4.13E-13 | 4.55E-12 | 1.626259 | 6.02153  | 1.391463 | 64.73168 | 66.31243 | 59.29379 |
| 575   | RET       | 135.2603 | 4.357173 | 0.314727 | 13.84429 | 1.38E-43 | 6.37E-42 | 7.589209 | 15.32753 | 15.30609 | 216.5163 | 267.3888 | 289.4341 |
| 9445  | TRIM40    | 6.252241 | 4.353894 | 1.452107 | 2.998329 | 0.002715 | 0.007641 | 1.084173 | 0.547412 | 0        | 15.62489 | 19.252   | 1.004979 |
| 9333  | LOC103246 | 6.247994 | 4.353799 | 1.440293 | 3.022856 | 0.002504 | 0.007133 | 0        | 1.642235 | 0        | 17.85702 | 14.97377 | 3.014938 |
| 7753  | TMEM132b  | 8.562408 | 4.353728 | 1.252043 | 3.477299 | 0.000506 | 0.001737 | 1.626259 | 0        | 0.695731 | 26.78552 | 19.252   | 3.014938 |
| 6830  | GLOD5     | 11.66375 | 4.351992 | 1.143236 | 3.806731 | 0.000141 | 0.000548 | 0        | 0        | 3.478657 | 20.08914 | 36.36488 | 10.04979 |
| 5371  | DIPK2B    | 13.08856 | 4.351552 | 0.971346 | 4.479921 | 7.47E-06 | 3.70E-05 | 0        | 1.642235 | 2.087194 | 20.08914 | 40.6431  | 14.06971 |
| 7245  | LOC119621 | 9.219658 | 4.350832 | 1.190683 | 3.654064 | 0.000258 | 0.000947 | 0        | 0        | 2.782925 | 20.08914 | 21.39111 | 11.05477 |
| 10125 | SCRT2     | 4.309328 | 4.349198 | 1.535777 | 2.83192  | 0.004627 | 0.012149 | 0        | 0.547412 | 0.695731 | 11.16063 | 6.417332 | 7.034856 |
| 9135  | LOC103241 | 7.004185 | 4.349133 | 1.416099 | 3.071206 | 0.002132 | 0.006205 | 0        | 0        | 2.087194 | 13.39276 | 23.53022 | 3.014938 |
| 4828  | SLC6A2    | 17.80625 | 4.347358 | 0.906559 | 4.795452 | 1.62E-06 | 8.94E-06 | 0        | 1.642235 | 3.478657 | 46.87467 | 42.78221 | 12.05975 |
| 5589  | LOC103231 | 13.09972 | 4.346881 | 0.99313  | 4.376949 | 1.20E-05 | 5.72E-05 | 0.542086 | 1.094824 | 2.087194 | 15.62489 | 49.19955 | 10.04979 |
| 13589 | ANKUB1    | 2.159748 | 4.343012 | 2.076262 | 2.091745 | 0.036461 | 0.071331 | 0        | 0.547412 | 0        | 2.232127 | 2.139111 | 8.039836 |
| 14641 | LOC103238 | 2.306972 | 4.337732 | 2.285005 | 1.898347 | 0.05765  | 0.104674 | 0.542086 | 0        | 0        | 11.16063 | 2.139111 | 0        |
| 14642 | LOC119621 | 2.306972 | 4.337732 | 2.285005 | 1.898347 | 0.05765  | 0.104674 | 0.542086 | 0        | 0        | 11.16063 | 2.139111 | 0        |
| 14621 | LOC119620 | 2.332579 | 4.337344 | 2.278576 | 1.903533 | 0.056971 | 0.103582 | 0        | 0        | 0.695731 | 11.16063 | 2.139111 | 0        |
| 8534  | HGF       | 6.760068 | 4.335513 | 1.336076 | 3.24496  | 0.001175 | 0.003659 | 0        | 0        | 2.087194 | 17.85702 | 8.556443 | 12.05975 |
| 8685  | LOC103221 | 6.16357  | 4.335115 | 1.351406 | 3.207856 | 0.001337 | 0.004094 | 0.542086 | 1.094824 | 0        | 8.928508 | 21.39111 | 5.024897 |
| 8676  | LOC119624 | 6.445346 | 4.333594 | 1.349908 | 3.210287 | 0.001326 | 0.004063 | 0.542086 | 0.547412 | 0.695731 | 15.62489 | 19.252   | 2.009959 |
| 10963 | LOC103225 | 4.389406 | 4.333184 | 1.643606 | 2.636389 | 0.008379 | 0.02032  | 0        | 0.547412 | 0.695731 | 13.39276 | 10.69555 | 1.004979 |
| 1508  | LOC103234 | 62.42067 | 4.331254 | 0.469202 | 9.23111  | 2.68E-20 | 4.72E-19 | 5.420864 | 10.40082 | 1.391463 | 127.2312 | 115.512  | 114.5677 |
| 8328  | LOC119618 | 6.616924 | 4.330935 | 1.310092 | 3.305825 | 0.000947 | 0.003023 | 0        | 0.547412 | 1.391463 | 15.62489 | 17.11289 | 5.024897 |
| 6001  | LOC103231 | 69.09739 | 4.329492 | 1.039915 | 4.163313 | 3.14E-05 | 0.000139 | 0.542086 | 6.02153  | 13.2189  | 176.338  | 156.1551 | 62.30873 |
| 10472 | LOC119619 | 4.336876 | 4.328262 | 1.573444 | 2.75082  | 0.005945 | 0.015091 | 0        | 0.547412 | 0.695731 | 8.928508 | 12.83466 | 3.014938 |
| 10489 | CFHR5     | 4.284345 | 4.327936 | 1.575305 | 2.747363 | 0.006008 | 0.015227 | 0        | 0.547412 | 0.695731 | 4.464254 | 14.97377 | 5.024897 |
| 1708  | CRB2      | 47.65576 | 4.327818 | 0.497346 | 8.701834 | 3.27E-18 | 5.08E-17 | 2.168345 | 6.568942 | 4.87012  | 73.66019 | 111.2338 |          |



|       |           |          |          |          |          |          |          |          |          |          |          |          |          |
|-------|-----------|----------|----------|----------|----------|----------|----------|----------|----------|----------|----------|----------|----------|
| 10556 | LOC103221 | 4.492064 | 4.326925 | 1.583553 | 2.732417 | 0.006287 | 0.015834 | 0        | 0        | 1.391463 | 6.696381 | 12.83466 | 6.029877 |
| 13471 | LOC119618 | 2.295551 | 4.3262   | 2.047756 | 2.112654 | 0.03463  | 0.068333 | 0        | 0        | 0.695731 | 8.928508 | 2.139111 | 2.009959 |
| 13472 | POF1B     | 2.295551 | 4.3262   | 2.047756 | 2.112654 | 0.03463  | 0.068333 | 0        | 0        | 0.695731 | 8.928508 | 2.139111 | 2.009959 |
| 13473 | INSL3     | 2.295551 | 4.3262   | 2.047756 | 2.112654 | 0.03463  | 0.068333 | 0        | 0        | 0.695731 | 8.928508 | 2.139111 | 2.009959 |
| 14460 | LOC119621 | 2.317077 | 4.326177 | 2.23899  | 1.9322   | 0.053335 | 0.098057 | 0        | 0        | 0.695731 | 8.928508 | 4.278221 | 0        |
| 13224 | LOC119618 | 2.217413 | 4.324656 | 1.998479 | 2.163974 | 0.030466 | 0.061248 | 0.542086 | 0        | 0        | 4.464254 | 4.278221 | 4.019918 |
| 13194 | LOC119620 | 2.243021 | 4.324625 | 1.992812 | 2.170112 | 0.029998 | 0.060445 | 0        | 0        | 0.695731 | 4.464254 | 4.278221 | 4.019918 |
| 3689  | LOC119621 | 28.48315 | 4.32453  | 0.765428 | 5.649818 | 1.61E-08 | 1.16E-07 | 0.542086 | 2.189647 | 5.565851 | 55.80317 | 87.70354 | 19.09461 |
| 10979 | LOC103235 | 4.581623 | 4.323613 | 1.641569 | 2.63383  | 0.008443 | 0.020442 | 0        | 0        | 1.391463 | 13.39276 | 10.69555 | 2.009959 |
| 10980 | VSIG4     | 4.581623 | 4.323613 | 1.641569 | 2.63383  | 0.008443 | 0.020442 | 0        | 0        | 1.391463 | 13.39276 | 10.69555 | 2.009959 |
| 8744  | LOC119621 | 6.809141 | 4.32131  | 1.354672 | 3.189932 | 0.001423 | 0.004327 | 0        | 0        | 2.087194 | 15.62489 | 17.11289 | 6.029877 |
| 18373 | LOC119621 | 1.116063 | 4.321142 | 3.409414 | 1.267415 | 0.205007 | 0.296443 | 0        | 0        | 0        | 6.696381 | 0        | 0        |
| 18374 | TRNAH-GU  | 1.116063 | 4.321142 | 3.409414 | 1.267415 | 0.205007 | 0.296443 | 0        | 0        | 0        | 6.696381 | 0        | 0        |
| 18375 | LOC103240 | 1.116063 | 4.321142 | 3.409414 | 1.267415 | 0.205007 | 0.296443 | 0        | 0        | 0        | 6.696381 | 0        | 0        |
| 18376 | LOC103217 | 1.116063 | 4.321142 | 3.409414 | 1.267415 | 0.205007 | 0.296443 | 0        | 0        | 0        | 6.696381 | 0        | 0        |
| 18378 | LOC119621 | 1.116063 | 4.321142 | 3.409414 | 1.267415 | 0.205007 | 0.296443 | 0        | 0        | 0        | 6.696381 | 0        | 0        |
| 18379 | WFDC10A   | 1.116063 | 4.321142 | 3.409414 | 1.267415 | 0.205007 | 0.296443 | 0        | 0        | 0        | 6.696381 | 0        | 0        |
| 18380 | LOC119620 | 1.116063 | 4.321142 | 3.409414 | 1.267415 | 0.205007 | 0.296443 | 0        | 0        | 0        | 6.696381 | 0        | 0        |
| 18381 | LOC119620 | 1.116063 | 4.321142 | 3.409414 | 1.267415 | 0.205007 | 0.296443 | 0        | 0        | 0        | 6.696381 | 0        | 0        |
| 18382 | LOC119621 | 1.116063 | 4.321142 | 3.409414 | 1.267415 | 0.205007 | 0.296443 | 0        | 0        | 0        | 6.696381 | 0        | 0        |
| 18383 | LOC103227 | 1.116063 | 4.321142 | 3.409414 | 1.267415 | 0.205007 | 0.296443 | 0        | 0        | 0        | 6.696381 | 0        | 0        |
| 10742 | LOC119621 | 4.30587  | 4.320886 | 1.611278 | 2.681652 | 0.007326 | 0.018131 | 0        | 0.547412 | 0.695731 | 4.464254 | 17.11289 | 3.014938 |
| 14473 | PTGDR     | 2.276854 | 4.317396 | 2.23739  | 1.929657 | 0.053649 | 0.098547 | 0        | 0.547412 | 0        | 6.696381 | 6.417332 | 0        |
| 4947  | SLC36A2   | 15.11113 | 4.317314 | 0.915594 | 4.715317 | 2.41E-06 | 1.30E-05 | 0        | 1.642235 | 2.782925 | 37.94616 | 34.22577 | 14.06971 |
| 13386 | ARL14EPL  | 2.202798 | 4.316991 | 2.026744 | 2.130013 | 0.033171 | 0.065878 | 0        | 0.547412 | 0        | 2.232127 | 6.417332 | 4.019918 |
| 14445 | LRRC2     | 2.301574 | 4.31699  | 2.230921 | 1.93507  | 0.052982 | 0.097502 | 0        | 0        | 0.695731 | 6.696381 | 6.417332 | 0        |
| 14446 | PRR4      | 2.301574 | 4.31699  | 2.230921 | 1.93507  | 0.052982 | 0.097502 | 0        | 0        | 0.695731 | 6.696381 | 6.417332 | 0        |
| 13353 | LOC103231 | 2.227518 | 4.316982 | 2.021151 | 2.135903 | 0.032687 | 0.065077 | 0        | 0        | 0.695731 | 2.232127 | 6.417332 | 4.019918 |
| 13316 | LOC103235 | 2.280049 | 4.316373 | 2.013688 | 2.143516 | 0.032072 | 0.063992 | 0        | 0        | 0.695731 | 6.696381 | 4.278221 | 2.009959 |
| 13317 | HTR1E     | 2.280049 | 4.316373 | 2.013688 | 2.143516 | 0.032072 | 0.063992 | 0        | 0        | 0.695731 | 6.696381 | 4.278221 | 2.009959 |
| 13319 | LOC119621 | 2.280049 | 4.316373 | 2.013688 | 2.143516 | 0.032072 | 0.063992 | 0        | 0        | 0.695731 | 6.696381 | 4.278221 | 2.009959 |
| 13321 | RERGL     | 2.280049 | 4.316373 | 2.013688 | 2.143516 | 0.032072 | 0.063992 | 0        | 0        | 0.695731 | 6.696381 | 4.278221 | 2.009959 |
| 13324 | LOC119621 | 2.280049 | 4.316373 | 2.013688 | 2.143516 | 0.032072 | 0.063992 | 0        | 0        | 0.695731 | 6.696381 | 4.278221 | 2.009959 |
| 4879  | LOC119621 | 17.85869 | 4.315402 | 0.907913 | 4.7531   | 2.00E-06 | 1.09E-05 | 0.542086 | 0        | 4.87012  | 35.71403 | 44.92132 | 21.10457 |
| 10987 | LOC103221 | 4.498087 | 4.311791 | 1.637868 | 2.632564 | 0.008474 | 0.020505 | 0        | 0        | 1.391463 | 4.464254 | 17.11289 | 4.019918 |
| 11131 | LOC103224 | 4.461059 | 4.310051 | 1.660208 | 2.59609  | 0.009429 | 0.02252  | 0        | 0        | 1.391463 | 2.232127 | 17.11289 | 6.029877 |
| 13373 | PRDM6     | 2.239826 | 4.308792 | 2.021285 | 2.131709 | 0.033031 | 0.065662 | 0        | 0.547412 | 0        | 4.464254 | 6.417332 | 2.009959 |
| 6192  | LOC103241 | 10.96559 | 4.308538 | 1.056686 | 4.077405 | 4.55E-05 | 0.000196 | 0.542086 | 0        | 2.782925 | 29.01765 | 21.39111 | 12.05975 |
| 13348 | LOC103241 | 2.264546 | 4.308522 | 2.01591  | 2.137259 | 0.032577 | 0.064873 | 0        | 0        | 0.695731 | 4.464254 | 6.417332 | 2.009959 |
| 13349 | CPHL      | 2.264546 | 4.308522 | 2.01591  | 2.137259 | 0.032577 | 0.064873 | 0        | 0        | 0.695731 | 4.464254 | 6.417332 | 2.009959 |
| 13350 | LOC119621 | 2.264546 | 4.308522 | 2.01591  | 2.137259 | 0.032577 | 0.064873 | 0        | 0        | 0.695731 | 4.464254 | 6.417332 | 2.009959 |
| 6187  | CUNH8orf1 | 10.78028 | 4.308348 | 1.055784 | 4.08071  | 4.49E-05 | 0.000193 | 0        | 1.094824 | 2.087194 | 26.78552 | 25.66933 | 9.044815 |
| 2287  | LOC119621 | 59.85873 | 4.307931 | 0.57895  | 7.440936 | 1.00E-13 | 1.16E-12 | 0.542086 | 6.568942 | 10.43597 | 113.8385 | 160.4333 | 67.33362 |
| 4108  | CUNH8orf1 | 19.20043 | 4.307704 | 0.814225 | 5.29056  | 1.22E-07 | 7.89E-07 | 0        | 2.189647 | 3.478657 | 44.64254 | 42.78221 | 22.10955 |
| 5428  | TMEM176I  | 12.93977 | 4.317574 | 0.968613 | 4.447158 | 8.70E-06 | 4.26E-05 | 0        | 1.094824 | 2.782925 | 22.32127 | 36.36488 | 15.07469 |
| 17363 | LOC119624 | 1.079035 | 4.304465 | 2.996847 | 1.436331 | 0.150908 | 0.23098  | 0        | 0        | 0        | 4.464254 | 0        | 2.009959 |
| 17364 | LOC103230 | 1.079035 | 4.304465 | 2.996847 | 1.436331 | 0.150908 | 0.23098  | 0        | 0        | 0        | 4.464254 | 0        | 2.009959 |
| 17365 | LOC103231 | 1.079035 | 4.304465 | 2.996847 | 1.436331 | 0.150908 | 0.23098  | 0        | 0        | 0        | 4.464254 | 0        | 2.009959 |
| 17366 | DLEU7     | 1.079035 | 4.304465 | 2.996847 | 1.436331 | 0.150908 | 0.23098  | 0        | 0        | 0        | 4.464254 | 0        | 2.009959 |
| 17367 | LOC119620 | 1.079035 | 4.304465 | 2.996847 | 1.436331 | 0.150908 | 0.23098  | 0        | 0        | 0        | 4.464254 | 0        | 2.009959 |
| 17369 | LOC119621 | 1.079035 | 4.304465 | 2.996847 | 1.436331 | 0.150908 | 0.23098  | 0        | 0        | 0        | 4.464254 | 0        | 2.009959 |
| 15759 | TFF1      | 2.255066 | 4.303518 | 2.519936 | 1.707789 | 0.087676 | 0.147906 | 0        | 0        | 0.695731 | 0        | 12.83466 | 0        |
| 14797 | LOC103244 | 2.245849 | 4.303188 | 2.296916 | 1.873464 | 0.061004 | 0.109603 | 0        | 0.547412 | 0        | 2.232127 | 10.69555 | 0        |
| 11338 | LOC103221 | 4.482584 | 4.303138 | 1.688313 | 2.54878  | 0.01081  | 0.025347 | 0        | 0        | 1.391463 | 2.232127 | 19.252   | 4.019918 |
| 6505  | IL7R      | 11.02503 | 4.303102 | 1.092394 | 3.93915  | 8.18E-05 | 0.000334 | 0        | 0.547412 | 2.782925 | 31.24978 | 23.53022 | 8.039836 |
| 10387 | SLITRK4   | 27.92745 | 4.302881 | 1.554139 | 2.176866 | 0.005629 | 0.014406 | 0        | 0.547412 | 7.653045 | 53.57105 | 87.70354 | 18.08963 |
| 14765 | LOC119619 | 2.270569 | 4.302842 | 2.290316 | 1.878711 | 0.060284 | 0.108536 | 0        | 0        | 0.695731 | 2.232127 | 10.69555 | 0        |
| 14766 | LOC103235 | 2.270569 | 4.302842 | 2.290316 | 1.878711 | 0.060284 | 0.108536 | 0        | 0        | 0.695731 | 2.232127 | 10.69555 | 0        |
| 8403  | LOC103224 | 5.999531 | 4.302641 | 1.310881 | 3.282251 | 0.00103  | 0.003258 | 0.542086 | 1.094824 | 0        | 15.62489 | 10.69555 | 8.039836 |
| 13607 | RBBP8NL   | 2.223436 | 4.302513 | 2.060304 | 2.088291 | 0.036772 | 0.071843 | 0.542086 | 0        | 0        | 2.232127 | 8.556443 | 2.009959 |
| 13603 | LOC103224 | 2.224323 | 4.302504 | 2.060104 | 2.088489 | 0.036754 | 0.071814 | 0        | 0.547412 | 0        | 2.232127 | 8.556443 | 2.009959 |
| 13605 | LOC119621 | 2.224323 | 4.302504 | 2.060104 | 2.088489 | 0.036754 | 0.071814 | 0        | 0.547412 | 0        | 2.232127 | 8.556443 | 2.009959 |
| 13606 | LOC119621 | 2.224323 | 4.302504 | 2.060104 | 2.088489 | 0.036754 | 0.071814 | 0        | 0.547412 | 0        | 2.232127 | 8.556443 | 2.009959 |
| 13571 | FABP6     | 2.249043 | 4.302263 | 2.054479 | 2.09409  | 0.036252 | 0.071011 | 0        | 0        | 0.695731 | 2.232127 | 8.556443 | 2.009959 |
| 13572 | LOC103234 | 2.249043 | 4.302263 | 2.054479 | 2.09409  | 0.036252 | 0.071011 | 0        | 0        | 0.695731 | 2.232127 | 8.556443 | 2.009959 |
| 6313  | ATOH1     | 10.95611 | 4.302169 | 1.070017 | 4.020655 | 5.80E-05 | 0.000244 | 0.542086 | 0        | 2.782925 | 24.5534  | 27.80844 | 10.04979 |
| 6258  | LOC119621 | 13.47619 | 4.300873 | 1.06299  | 4.046014 | 5.21E-05 | 0.000221 | 0        | 0        | 4.174388 | 20.08914 | 38.50399 | 18.08963 |
| 14547 | LOC103231 | 2.208821 | 4.300286 | 2.243343 | 1.916909 | 0.055249 | 0.10097  | 0        | 0.547412 | 0        | 0        | 10.69555 | 2.009959 |
| 17474 | LOC119624 | 1.042007 | 4.300194 | 3.03882  | 1.415087 | 0.157043 | 0.23883  | 0        | 0        | 0        | 2.232127 | 0        | 4.019918 |
| 17475 | LOC103217 | 1.042007 | 4.300194 | 3.03882  | 1.415087 | 0.157043 | 0.23883  | 0        | 0        | 0        | 2.232127 | 0        | 4.019918 |
| 17477 | APOC3     | 1.042007 | 4.300194 | 3.03882  | 1.415087 | 0.157043 | 0.23883  | 0        | 0        | 0        | 2.232127 | 0        | 4.019918 |
| 17478 | LOC119621 | 1.042007 | 4.300194 | 3.03882  | 1.415087 | 0.157043 | 0.23883  | 0        | 0        | 0        | 2.232127 | 0        | 4.019918 |
| 17480 | LOC103231 | 1.042007 | 4.300194 | 3.03882  | 1.415087 | 0.157043 | 0.23883  | 0        | 0        | 0        | 2.232127 | 0        | 4.019918 |
| 17481 | LOC119621 | 1.042007 | 4.300194 | 3.03882  | 1.415087 | 0.157043 | 0.23883  | 0        | 0        | 0        | 2.232127 | 0        | 4.019918 |



|       |           |          |          |          |          |           |           |          |          |          |          |          |          |
|-------|-----------|----------|----------|----------|----------|-----------|-----------|----------|----------|----------|----------|----------|----------|
| 8216  | ATP6V0D2  | 6.40549  | 4.299161 | 1.286573 | 3.341561 | 0.000833  | 0.002696  | 0.542086 | 0        | 1.391463 | 15.62489 | 12.83466 | 8.039836 |
| 6269  | LOC103232 | 10.85193 | 4.298031 | 1.063137 | 4.042784 | 5.28E-05  | 0.000224  | 0        | 0.547412 | 2.782925 | 15.62489 | 32.08666 | 14.06971 |
| 4606  | RIOX1     | 19.47875 | 4.298016 | 0.869954 | 4.940509 | 7.79E-07  | 4.50E-06  | 0        | 1.642235 | 4.174388 | 44.64254 | 51.33866 | 15.07469 |
| 12890 | LOC119623 | 26.0235  | 4.296839 | 1.935044 | 2.220538 | 0.026382  | 0.054412  | 0        | 0        | 7.653045 | 64.73168 | 55.61688 | 28.13943 |
| 12478 | DYNLT5    | 4.55664  | 4.295812 | 1.863765 | 2.304911 | 0.021172  | 0.045107  | 0        | 0        | 1.391463 | 6.696381 | 19.252   | 0        |
| 3154  | NCKAP1L   | 30.04069 | 4.294815 | 0.69134  | 6.212306 | 5.22E-10  | 4.40E-09  | 1.084173 | 1.642235 | 6.261582 | 73.66019 | 68.45154 | 29.1444  |
| 8687  | IFIT1B    | 6.480433 | 4.292662 | 1.338314 | 3.207516 | 0.001339  | 0.004097  | 0        | 0.547412 | 1.391463 | 20.08914 | 12.83466 | 4.019918 |
| 17487 | LOC119618 | 1.100561 | 4.291847 | 3.037936 | 1.412751 | 0.157729  | 0.23947   | 0        | 0        | 0        | 4.464254 | 2.139111 | 0        |
| 17488 | LOC119624 | 1.100561 | 4.291847 | 3.037936 | 1.412751 | 0.157729  | 0.23947   | 0        | 0        | 0        | 4.464254 | 2.139111 | 0        |
| 17490 | LOC103238 | 1.100561 | 4.291847 | 3.037936 | 1.412751 | 0.157729  | 0.23947   | 0        | 0        | 0        | 4.464254 | 2.139111 | 0        |
| 17491 | LOC119624 | 1.100561 | 4.291847 | 3.037936 | 1.412751 | 0.157729  | 0.23947   | 0        | 0        | 0        | 4.464254 | 2.139111 | 0        |
| 17492 | CCR3      | 1.100561 | 4.291847 | 3.037936 | 1.412751 | 0.157729  | 0.23947   | 0        | 0        | 0        | 4.464254 | 2.139111 | 0        |
| 17493 | LOC103228 | 1.100561 | 4.291847 | 3.037936 | 1.412751 | 0.157729  | 0.23947   | 0        | 0        | 0        | 4.464254 | 2.139111 | 0        |
| 17494 | LOC103248 | 1.100561 | 4.291847 | 3.037936 | 1.412751 | 0.157729  | 0.23947   | 0        | 0        | 0        | 4.464254 | 2.139111 | 0        |
| 17495 | LOC103221 | 1.100561 | 4.291847 | 3.037936 | 1.412751 | 0.157729  | 0.23947   | 0        | 0        | 0        | 4.464254 | 2.139111 | 0        |
| 17496 | SYT5      | 1.100561 | 4.291847 | 3.037936 | 1.412751 | 0.157729  | 0.23947   | 0        | 0        | 0        | 4.464254 | 2.139111 | 0        |
| 17497 | LOC119621 | 1.100561 | 4.291847 | 3.037936 | 1.412751 | 0.157729  | 0.23947   | 0        | 0        | 0        | 4.464254 | 2.139111 | 0        |
| 17498 | LOC119621 | 1.100561 | 4.291847 | 3.037936 | 1.412751 | 0.157729  | 0.23947   | 0        | 0        | 0        | 4.464254 | 2.139111 | 0        |
| 17499 | LOC103248 | 1.100561 | 4.291847 | 3.037936 | 1.412751 | 0.157729  | 0.23947   | 0        | 0        | 0        | 4.464254 | 2.139111 | 0        |
| 17500 | LOC119628 | 1.100561 | 4.291847 | 3.037936 | 1.412751 | 0.157729  | 0.23947   | 0        | 0        | 0        | 4.464254 | 2.139111 | 0        |
| 17502 | CUNH20orf | 1.100561 | 4.291847 | 3.037936 | 1.412751 | 0.157729  | 0.23947   | 0        | 0        | 0        | 4.464254 | 2.139111 | 0        |
| 17503 | LOC119619 | 1.100561 | 4.291847 | 3.037936 | 1.412751 | 0.157729  | 0.23947   | 0        | 0        | 0        | 4.464254 | 2.139111 | 0        |
| 17504 | LOC103230 | 1.100561 | 4.291847 | 3.037936 | 1.412751 | 0.157729  | 0.23947   | 0        | 0        | 0        | 4.464254 | 2.139111 | 0        |
| 17505 | LOC103247 | 1.100561 | 4.291847 | 3.037936 | 1.412751 | 0.157729  | 0.23947   | 0        | 0        | 0        | 4.464254 | 2.139111 | 0        |
| 17506 | LOC103231 | 1.100561 | 4.291847 | 3.037936 | 1.412751 | 0.157729  | 0.23947   | 0        | 0        | 0        | 4.464254 | 2.139111 | 0        |
| 17509 | LOC103231 | 1.100561 | 4.291847 | 3.037936 | 1.412751 | 0.157729  | 0.23947   | 0        | 0        | 0        | 4.464254 | 2.139111 | 0        |
| 17510 | LOC103218 | 1.100561 | 4.291847 | 3.037936 | 1.412751 | 0.157729  | 0.23947   | 0        | 0        | 0        | 4.464254 | 2.139111 | 0        |
| 17511 | LOC119621 | 1.100561 | 4.291847 | 3.037936 | 1.412751 | 0.157729  | 0.23947   | 0        | 0        | 0        | 4.464254 | 2.139111 | 0        |
| 1029  | TJP3      | 76.07073 | 4.289968 | 0.394734 | 10.86799 | 1.64E-27  | 4.23E-26  | 5.96295  | 6.02153  | 10.43597 | 174.1059 | 143.3204 | 116.5776 |
| 4560  | RASL12    | 17.08045 | 4.288832 | 0.863573 | 4.96638  | 6.82E-07  | 3.98E-06  | 1.084173 | 0        | 4.174388 | 42.41041 | 25.66933 | 29.1444  |
| 8384  | DMRTB1    | 6.359869 | 4.287955 | 1.304326 | 3.287488 | 0.001011  | 0.003205  | 0        | 0.547412 | 1.391463 | 8.928508 | 19.252   | 8.039836 |
| 5983  | GPHB5     | 10.16891 | 4.287702 | 1.027951 | 4.171116 | 3.03E-05  | 0.000135  | 0.542086 | 1.642235 | 0.695731 | 24.5534  | 23.53022 | 10.04979 |
| 13167 | DPP10     | 23.51007 | 4.287482 | 1.969045 | 2.177442 | 0.029448  | 0.059457  | 0        | 0        | 6.957314 | 60.26743 | 57.75599 | 16.07967 |
| 5386  | KLK4      | 14.81962 | 4.287356 | 0.959031 | 4.470507 | 7.80E-06  | 3.85E-05  | 0        | 1.642235 | 2.782925 | 20.08914 | 51.33866 | 13.06473 |
| 16473 | CUNH5orf  | 1.063533 | 4.286907 | 2.720691 | 1.575669 | 0.115102  | 0.185488  | 0        | 0        | 0        | 2.232127 | 2.139111 | 2.009959 |
| 16475 | LOC119624 | 1.063533 | 4.286907 | 2.720691 | 1.575669 | 0.115102  | 0.185488  | 0        | 0        | 0        | 2.232127 | 2.139111 | 2.009959 |
| 16477 | LOC119624 | 1.063533 | 4.286907 | 2.720691 | 1.575669 | 0.115102  | 0.185488  | 0        | 0        | 0        | 2.232127 | 2.139111 | 2.009959 |
| 16478 | INSL6     | 1.063533 | 4.286907 | 2.720691 | 1.575669 | 0.115102  | 0.185488  | 0        | 0        | 0        | 2.232127 | 2.139111 | 2.009959 |
| 16482 | LOC119628 | 1.063533 | 4.286907 | 2.720691 | 1.575669 | 0.115102  | 0.185488  | 0        | 0        | 0        | 2.232127 | 2.139111 | 2.009959 |
| 16483 | LOC103247 | 1.063533 | 4.286907 | 2.720691 | 1.575669 | 0.115102  | 0.185488  | 0        | 0        | 0        | 2.232127 | 2.139111 | 2.009959 |
| 16486 | LRIT1     | 1.063533 | 4.286907 | 2.720691 | 1.575669 | 0.115102  | 0.185488  | 0        | 0        | 0        | 2.232127 | 2.139111 | 2.009959 |
| 16487 | LOC103221 | 1.063533 | 4.286907 | 2.720691 | 1.575669 | 0.115102  | 0.185488  | 0        | 0        | 0        | 2.232127 | 2.139111 | 2.009959 |
| 16489 | LOC103229 | 1.063533 | 4.286907 | 2.720691 | 1.575669 | 0.115102  | 0.185488  | 0        | 0        | 0        | 2.232127 | 2.139111 | 2.009959 |
| 16490 | LOC103247 | 1.063533 | 4.286907 | 2.720691 | 1.575669 | 0.115102  | 0.185488  | 0        | 0        | 0        | 2.232127 | 2.139111 | 2.009959 |
| 16491 | LOC103231 | 1.063533 | 4.286907 | 2.720691 | 1.575669 | 0.115102  | 0.185488  | 0        | 0        | 0        | 2.232127 | 2.139111 | 2.009959 |
| 16492 | LOC119621 | 1.063533 | 4.286907 | 2.720691 | 1.575669 | 0.115102  | 0.185488  | 0        | 0        | 0        | 2.232127 | 2.139111 | 2.009959 |
| 16493 | PRM2      | 1.063533 | 4.286907 | 2.720691 | 1.575669 | 0.115102  | 0.185488  | 0        | 0        | 0        | 2.232127 | 2.139111 | 2.009959 |
| 16496 | SYCN      | 1.063533 | 4.286907 | 2.720691 | 1.575669 | 0.115102  | 0.185488  | 0        | 0        | 0        | 2.232127 | 2.139111 | 2.009959 |
| 16497 | CSN3      | 1.063533 | 4.286907 | 2.720691 | 1.575669 | 0.115102  | 0.185488  | 0        | 0        | 0        | 2.232127 | 2.139111 | 2.009959 |
| 6205  | LOC119625 | 13.3552  | 4.286621 | 1.053144 | 4.070308 | 4.70E-05  | 0.000201  | 0        | 0        | 4.174388 | 26.78552 | 32.08666 | 17.08465 |
| 4640  | LRRC18    | 17.23547 | 4.285946 | 0.870443 | 4.923867 | 8.49E-07  | 4.86E-06  | 0.542086 | 0.547412 | 4.174388 | 49.10679 | 29.94755 | 19.09461 |
| 6331  | LOC103248 | 15.79887 | 4.284115 | 1.067789 | 4.012136 | 6.02E-05  | 0.000253  | 0        | 0        | 4.87012  | 44.64254 | 34.22577 | 11.05477 |
| 8806  | LOC103221 | 6.583091 | 4.283412 | 1.350178 | 3.172479 | 0.001511  | 0.004563  | 0        | 0        | 2.087194 | 13.39276 | 14.97377 | 9.044815 |
| 17588 | GPR6      | 1.026505 | 4.283168 | 3.053752 | 1.402592 | 0.160739  | 0.242949  | 0        | 0        | 0        | 0        | 2.139111 | 4.019918 |
| 17589 | LOC119620 | 1.026505 | 4.283168 | 3.053752 | 1.402592 | 0.160739  | 0.242949  | 0        | 0        | 0        | 0        | 2.139111 | 4.019918 |
| 9395  | BEST4     | 6.694175 | 4.277147 | 1.421801 | 3.00826  | 0.002627  | 0.007435  | 0        | 0        | 2.087194 | 20.08914 | 14.97377 | 3.014938 |
| 8923  | FGF6      | 6.589114 | 4.275884 | 1.362348 | 3.138613 | 0.001697  | 0.005057  | 0        | 0        | 2.087194 | 11.16063 | 19.252   | 7.034856 |
| 8924  | LOC119621 | 6.589114 | 4.275884 | 1.362348 | 3.138613 | 0.001697  | 0.005057  | 0        | 0        | 2.087194 | 11.16063 | 19.252   | 7.034856 |
| 130   | SMPD3     | 386.9101 | 4.275179 | 0.185303 | 23.07126 | 9.00E-118 | 1.84E-115 | 39.5723  | 38.31883 | 36.17803 | 743.2983 | 663.1243 | 800.9686 |
| 17592 | ASIC5     | 1.085058 | 4.274666 | 3.051365 | 1.400903 | 0.161243  | 0.24309   | 0        | 0        | 0        | 2.232127 | 4.278221 | 0        |
| 17593 | LOC119624 | 1.085058 | 4.274666 | 3.051365 | 1.400903 | 0.161243  | 0.24309   | 0        | 0        | 0        | 2.232127 | 4.278221 | 0        |
| 17594 | LOC119618 | 1.085058 | 4.274666 | 3.051365 | 1.400903 | 0.161243  | 0.24309   | 0        | 0        | 0        | 2.232127 | 4.278221 | 0        |
| 17595 | LOC119624 | 1.085058 | 4.274666 | 3.051365 | 1.400903 | 0.161243  | 0.24309   | 0        | 0        | 0        | 2.232127 | 4.278221 | 0        |
| 17596 | LOC103234 | 1.085058 | 4.274666 | 3.051365 | 1.400903 | 0.161243  | 0.24309   | 0        | 0        | 0        | 2.232127 | 4.278221 | 0        |
| 17597 | LOC119625 | 1.085058 | 4.274666 | 3.051365 | 1.400903 | 0.161243  | 0.24309   | 0        | 0        | 0        | 2.232127 | 4.278221 | 0        |
| 17599 | LOC119626 | 1.085058 | 4.274666 | 3.051365 | 1.400903 | 0.161243  | 0.24309   | 0        | 0        | 0        | 2.232127 | 4.278221 | 0        |
| 17600 | LOC119628 | 1.085058 | 4.274666 | 3.051365 | 1.400903 | 0.161243  | 0.24309   | 0        | 0        | 0        | 2.232127 | 4.278221 | 0        |
| 17601 | LOC119626 | 1.085058 | 4.274666 | 3.051365 | 1.400903 | 0.161243  | 0.24309   | 0        | 0        | 0        | 2.232127 | 4.278221 | 0        |
| 17602 | LOC103228 | 1.085058 | 4.274666 | 3.051365 | 1.400903 | 0.161243  | 0.24309   | 0        | 0        | 0        | 2.232127 | 4.278221 | 0        |
| 17603 | LOC119628 | 1.085058 | 4.274666 | 3.051365 | 1.400903 | 0.161243  | 0.24309   | 0        | 0        | 0        | 2.232127 | 4.278221 | 0        |
| 17604 | LOC103247 | 1.085058 | 4.274666 | 3.051365 | 1.400903 | 0.161243  | 0.24309   | 0        | 0        | 0        | 2.232127 | 4.278221 | 0        |
| 17606 | GKN2      | 1.085058 | 4.274666 | 3.051365 | 1.400903 | 0.161243  | 0.24309   | 0        | 0        | 0        | 2.232127 | 4.278221 | 0        |
| 17607 | LOC119621 | 1.085058 | 4.274666 | 3.051365 | 1.400903 | 0.161243  | 0.24309   | 0        | 0        | 0        | 2.232127 | 4.278221 | 0        |
| 17608 | LOC119621 | 1.085058 | 4.274666 | 3.051365 | 1.400903 | 0.161243  | 0.24309   | 0        | 0        | 0        | 2.232127 | 4.278221 | 0        |



|       |           |          |          |          |          |          |          |          |          |          |          |          |          |
|-------|-----------|----------|----------|----------|----------|----------|----------|----------|----------|----------|----------|----------|----------|
| 17609 | LOC119621 | 1.085058 | 4.274666 | 3.051365 | 1.400903 | 0.161243 | 0.24309  | 0        | 0        | 0        | 2.232127 | 4.278221 | 0        |
| 17610 | LOC119621 | 1.085058 | 4.274666 | 3.051365 | 1.400903 | 0.161243 | 0.24309  | 0        | 0        | 0        | 2.232127 | 4.278221 | 0        |
| 17611 | LOC10321  | 1.085058 | 4.274666 | 3.051365 | 1.400903 | 0.161243 | 0.24309  | 0        | 0        | 0        | 2.232127 | 4.278221 | 0        |
| 17612 | LOC11961  | 1.085058 | 4.274666 | 3.051365 | 1.400903 | 0.161243 | 0.24309  | 0        | 0        | 0        | 2.232127 | 4.278221 | 0        |
| 17614 | LOC11961  | 1.085058 | 4.274666 | 3.051365 | 1.400903 | 0.161243 | 0.24309  | 0        | 0        | 0        | 2.232127 | 4.278221 | 0        |
| 17615 | LOC11961  | 1.085058 | 4.274666 | 3.051365 | 1.400903 | 0.161243 | 0.24309  | 0        | 0        | 0        | 2.232127 | 4.278221 | 0        |
| 17617 | LOC11961  | 1.085058 | 4.274666 | 3.051365 | 1.400903 | 0.161243 | 0.24309  | 0        | 0        | 0        | 2.232127 | 4.278221 | 0        |
| 17618 | LOC11961  | 1.085058 | 4.274666 | 3.051365 | 1.400903 | 0.161243 | 0.24309  | 0        | 0        | 0        | 2.232127 | 4.278221 | 0        |
| 17620 | UBE2QL1   | 1.085058 | 4.274666 | 3.051365 | 1.400903 | 0.161243 | 0.24309  | 0        | 0        | 0        | 2.232127 | 4.278221 | 0        |
| 17623 | LOC11962  | 1.085058 | 4.274666 | 3.051365 | 1.400903 | 0.161243 | 0.24309  | 0        | 0        | 0        | 2.232127 | 4.278221 | 0        |
| 17625 | LOC10323  | 1.085058 | 4.274666 | 3.051365 | 1.400903 | 0.161243 | 0.24309  | 0        | 0        | 0        | 2.232127 | 4.278221 | 0        |
| 17626 | KRTAP1-3  | 1.085058 | 4.274666 | 3.051365 | 1.400903 | 0.161243 | 0.24309  | 0        | 0        | 0        | 2.232127 | 4.278221 | 0        |
| 17627 | KRT40     | 1.085058 | 4.274666 | 3.051365 | 1.400903 | 0.161243 | 0.24309  | 0        | 0        | 0        | 2.232127 | 4.278221 | 0        |
| 17628 | LOC10324  | 1.085058 | 4.274666 | 3.051365 | 1.400903 | 0.161243 | 0.24309  | 0        | 0        | 0        | 2.232127 | 4.278221 | 0        |
| 17630 | LOC10323  | 1.085058 | 4.274666 | 3.051365 | 1.400903 | 0.161243 | 0.24309  | 0        | 0        | 0        | 2.232127 | 4.278221 | 0        |
| 17631 | LOC10323  | 1.085058 | 4.274666 | 3.051365 | 1.400903 | 0.161243 | 0.24309  | 0        | 0        | 0        | 2.232127 | 4.278221 | 0        |
| 17632 | LOC10324  | 1.085058 | 4.274666 | 3.051365 | 1.400903 | 0.161243 | 0.24309  | 0        | 0        | 0        | 2.232127 | 4.278221 | 0        |
| 17633 | LOC10322  | 1.085058 | 4.274666 | 3.051365 | 1.400903 | 0.161243 | 0.24309  | 0        | 0        | 0        | 2.232127 | 4.278221 | 0        |
| 17634 | LOC11962  | 1.085058 | 4.274666 | 3.051365 | 1.400903 | 0.161243 | 0.24309  | 0        | 0        | 0        | 2.232127 | 4.278221 | 0        |
| 10485 | SHE       | 4.110826 | 4.273438 | 1.554913 | 2.748345 | 0.00599  | 0.015187 | 0        | 0.547412 | 0.695731 | 6.696381 | 10.69555 | 6.029877 |
| 9553  | PLD4      | 6.408055 | 4.273287 | 1.437989 | 2.971711 | 0.002961 | 0.008241 | 0.542086 | 0        | 1.391463 | 6.696381 | 27.80844 | 2.009959 |
| 7165  | HS6ST3    | 8.534432 | 4.272987 | 1.162476 | 3.675763 | 0.000237 | 0.00088  | 0        | 0.547412 | 2.087194 | 24.5534  | 14.97377 | 9.044815 |
| 8851  | EYA1      | 8.664008 | 4.27237  | 1.353618 | 3.156259 | 0.001598 | 0.0048   | 0        | 0.547412 | 2.087194 | 6.696381 | 40.6431  | 2.009959 |
| 1090  | KCNT1     | 66.42003 | 4.271937 | 0.405008 | 10.54779 | 5.20E-26 | 1.27E-24 | 6.505036 | 4.379295 | 9.044508 | 116.0706 | 136.9031 | 125.6224 |
| 17514 | LOC11962  | 1.04803  | 4.270506 | 3.025108 | 1.411687 | 0.158042 | 0.239678 | 0        | 0        | 0        | 0        | 4.278221 | 2.009959 |
| 17515 | LOC11962  | 1.04803  | 4.270506 | 3.025108 | 1.411687 | 0.158042 | 0.239678 | 0        | 0        | 0        | 0        | 4.278221 | 2.009959 |
| 17516 | MS4A5     | 1.04803  | 4.270506 | 3.025108 | 1.411687 | 0.158042 | 0.239678 | 0        | 0        | 0        | 0        | 4.278221 | 2.009959 |
| 17517 | AADACL2   | 1.04803  | 4.270506 | 3.025108 | 1.411687 | 0.158042 | 0.239678 | 0        | 0        | 0        | 0        | 4.278221 | 2.009959 |
| 17518 | NRSN1     | 1.04803  | 4.270506 | 3.025108 | 1.411687 | 0.158042 | 0.239678 | 0        | 0        | 0        | 0        | 4.278221 | 2.009959 |
| 17519 | LOC10321  | 1.04803  | 4.270506 | 3.025108 | 1.411687 | 0.158042 | 0.239678 | 0        | 0        | 0        | 0        | 4.278221 | 2.009959 |
| 17520 | LOC11962  | 1.04803  | 4.270506 | 3.025108 | 1.411687 | 0.158042 | 0.239678 | 0        | 0        | 0        | 0        | 4.278221 | 2.009959 |
| 17523 | LOC10321  | 1.04803  | 4.270506 | 3.025108 | 1.411687 | 0.158042 | 0.239678 | 0        | 0        | 0        | 0        | 4.278221 | 2.009959 |
| 17524 | LOC11961  | 1.04803  | 4.270506 | 3.025108 | 1.411687 | 0.158042 | 0.239678 | 0        | 0        | 0        | 0        | 4.278221 | 2.009959 |
| 17525 | LOC10322  | 1.04803  | 4.270506 | 3.025108 | 1.411687 | 0.158042 | 0.239678 | 0        | 0        | 0        | 0        | 4.278221 | 2.009959 |
| 17528 | SPACA3    | 1.04803  | 4.270506 | 3.025108 | 1.411687 | 0.158042 | 0.239678 | 0        | 0        | 0        | 0        | 4.278221 | 2.009959 |
| 17529 | LOC11962  | 1.04803  | 4.270506 | 3.025108 | 1.411687 | 0.158042 | 0.239678 | 0        | 0        | 0        | 0        | 4.278221 | 2.009959 |
| 17530 | LOC11962  | 1.04803  | 4.270506 | 3.025108 | 1.411687 | 0.158042 | 0.239678 | 0        | 0        | 0        | 0        | 4.278221 | 2.009959 |
| 9137  | KRT71     | 6.610639 | 4.270094 | 1.391125 | 3.069527 | 0.002144 | 0.006238 | 0        | 0        | 2.087194 | 11.16063 | 21.39111 | 5.024897 |
| 10736 | LOC10323  | 4.303042 | 4.269109 | 1.590964 | 2.683348 | 0.007289 | 0.018047 | 0        | 0        | 1.391463 | 6.696381 | 10.69555 | 7.034856 |
| 10737 | OLIG3     | 4.303042 | 4.269109 | 1.590964 | 2.683348 | 0.007289 | 0.018047 | 0        | 0        | 1.391463 | 6.696381 | 10.69555 | 7.034856 |
| 5     | SOD2      | 65902.44 | 4.268737 | 0.080038 | 53.33394 | 0        | 0        | 6571.713 | 6666.928 | 6262.278 | 124550.5 | 121323.9 | 130039.3 |
| 6535  | CHP2      | 10.70596 | 4.268182 | 1.087388 | 3.925169 | 8.67E-05 | 0.000353 | 0        | 0.547412 | 2.782925 | 15.62489 | 34.22577 | 11.05477 |
| 6884  | CCNP      | 8.279317 | 4.268045 | 1.128206 | 3.783035 | 0.000155 | 0.000598 | 0.542086 | 0.547412 | 1.391463 | 15.62489 | 23.53022 | 8.039836 |
| 4293  | LOC11962  | 15.84583 | 4.267913 | 0.827145 | 5.159813 | 2.47E-07 | 1.53E-06 | 2.168345 | 0.547412 | 2.087194 | 17.85702 | 34.22577 | 38.18922 |
| 18605 | CUNH1orf  | 1.069555 | 4.26734  | 3.459098 | 1.233657 | 0.217331 | 0.309867 | 0        | 0        | 0        | 0        | 6.417332 | 0        |
| 18606 | ANXA10    | 1.069555 | 4.26734  | 3.459098 | 1.233657 | 0.217331 | 0.309867 | 0        | 0        | 0        | 0        | 6.417332 | 0        |
| 18608 | LOC11962  | 1.069555 | 4.26734  | 3.459098 | 1.233657 | 0.217331 | 0.309867 | 0        | 0        | 0        | 0        | 6.417332 | 0        |
| 18609 | LOC11962  | 1.069555 | 4.26734  | 3.459098 | 1.233657 | 0.217331 | 0.309867 | 0        | 0        | 0        | 0        | 6.417332 | 0        |
| 18612 | LOC11962  | 1.069555 | 4.26734  | 3.459098 | 1.233657 | 0.217331 | 0.309867 | 0        | 0        | 0        | 0        | 6.417332 | 0        |
| 18613 | LOC11962  | 1.069555 | 4.26734  | 3.459098 | 1.233657 | 0.217331 | 0.309867 | 0        | 0        | 0        | 0        | 6.417332 | 0        |
| 18614 | LOC11962  | 1.069555 | 4.26734  | 3.459098 | 1.233657 | 0.217331 | 0.309867 | 0        | 0        | 0        | 0        | 6.417332 | 0        |
| 18616 | LOC11962  | 1.069555 | 4.26734  | 3.459098 | 1.233657 | 0.217331 | 0.309867 | 0        | 0        | 0        | 0        | 6.417332 | 0        |
| 18617 | LOC10324  | 1.069555 | 4.26734  | 3.459098 | 1.233657 | 0.217331 | 0.309867 | 0        | 0        | 0        | 0        | 6.417332 | 0        |
| 18618 | LOC10324  | 1.069555 | 4.26734  | 3.459098 | 1.233657 | 0.217331 | 0.309867 | 0        | 0        | 0        | 0        | 6.417332 | 0        |
| 18619 | LOC10324  | 1.069555 | 4.26734  | 3.459098 | 1.233657 | 0.217331 | 0.309867 | 0        | 0        | 0        | 0        | 6.417332 | 0        |
| 18620 | LOC11962  | 1.069555 | 4.26734  | 3.459098 | 1.233657 | 0.217331 | 0.309867 | 0        | 0        | 0        | 0        | 6.417332 | 0        |
| 18623 | LOC11962  | 1.069555 | 4.26734  | 3.459098 | 1.233657 | 0.217331 | 0.309867 | 0        | 0        | 0        | 0        | 6.417332 | 0        |
| 18626 | LOC10324  | 1.069555 | 4.26734  | 3.459098 | 1.233657 | 0.217331 | 0.309867 | 0        | 0        | 0        | 0        | 6.417332 | 0        |
| 18628 | ACTBL2    | 1.069555 | 4.26734  | 3.459098 | 1.233657 | 0.217331 | 0.309867 | 0        | 0        | 0        | 0        | 6.417332 | 0        |
| 18630 | LOC11961  | 1.069555 | 4.26734  | 3.459098 | 1.233657 | 0.217331 | 0.309867 | 0        | 0        | 0        | 0        | 6.417332 | 0        |
| 18632 | LOC11961  | 1.069555 | 4.26734  | 3.459098 | 1.233657 | 0.217331 | 0.309867 | 0        | 0        | 0        | 0        | 6.417332 | 0        |
| 18633 | DEFA1     | 1.069555 | 4.26734  | 3.459098 | 1.233657 | 0.217331 | 0.309867 | 0        | 0        | 0        | 0        | 6.417332 | 0        |
| 18635 | LOC10323  | 1.069555 | 4.26734  | 3.459098 | 1.233657 | 0.217331 | 0.309867 | 0        | 0        | 0        | 0        | 6.417332 | 0        |
| 18637 | LOC11962  | 1.069555 | 4.26734  | 3.459098 | 1.233657 | 0.217331 | 0.309867 | 0        | 0        | 0        | 0        | 6.417332 | 0        |
| 18638 | CCL26     | 1.069555 | 4.26734  | 3.459098 | 1.233657 | 0.217331 | 0.309867 | 0        | 0        | 0        | 0        | 6.417332 | 0        |
| 18639 | LOC10322  | 1.069555 | 4.26734  | 3.459098 | 1.233657 | 0.217331 | 0.309867 | 0        | 0        | 0        | 0        | 6.417332 | 0        |
| 18640 | CNFN      | 1.069555 | 4.26734  | 3.459098 | 1.233657 | 0.217331 | 0.309867 | 0        | 0        | 0        | 0        | 6.417332 | 0        |
| 18641 | LOC10323  | 1.069555 | 4.26734  | 3.459098 | 1.233657 | 0.217331 | 0.309867 | 0        | 0        | 0        | 0        | 6.417332 | 0        |
| 18642 | LOC11962  | 1.069555 | 4.26734  | 3.459098 | 1.233657 | 0.217331 | 0.309867 | 0        | 0        | 0        | 0        | 6.417332 | 0        |
| 18644 | LOC10322  | 1.069555 | 4.26734  | 3.459098 | 1.233657 | 0.217331 | 0.309867 | 0        | 0        | 0        | 0        | 6.417332 | 0        |
| 18645 | LOC11962  | 1.069555 | 4.26734  | 3.459098 | 1.233657 | 0.217331 | 0.309867 | 0        | 0        | 0        | 0        | 6.417332 | 0        |
| 6707  | ABHD12B   | 10.86461 | 4.265395 | 1.107226 | 3.852325 | 0.000117 | 0.000464 | 0        | 0        | 3.478657 | 20.08914 | 23.53022 | 18.08963 |
| 4240  | LOC10324  | 15.85362 | 4.264083 | 0.821123 | 5.192987 | 2.07E-07 | 1.30E-06 | 1.084173 | 1.642235 | 2.087194 | 15.62489 | 38.50399 | 36.17926 |
| 5721  | C1QB      | 12.82197 | 4.263626 | 0.988539 | 4.313058 | 1.61E-05 | 7.48E-05 | 0        | 0.547412 | 3.478657 | 29.01765 | 27.80844 | 16.07967 |



|       |           |          |          |          |          |           |           |          |          |          |          |          |          |
|-------|-----------|----------|----------|----------|----------|-----------|-----------|----------|----------|----------|----------|----------|----------|
| 5903  | LOC103231 | 12.69433 | 4.263499 | 1.012748 | 4.209831 | 2.56E-05  | 0.000115  | 0        | 1.094824 | 2.782925 | 29.01765 | 34.22577 | 9.044815 |
| 5680  | CD28      | 12.76944 | 4.262754 | 0.983045 | 4.336273 | 1.45E-05  | 6.78E-05  | 0        | 0.547412 | 3.478657 | 24.5534  | 29.94755 | 18.08963 |
| 6456  | CUNH1orf  | 10.24705 | 4.26241  | 1.076972 | 3.957771 | 7.57E-05  | 0.000312  | 0        | 1.642235 | 1.391463 | 29.01765 | 21.39111 | 8.039836 |
| 8311  | PLIN5     | 6.180327 | 4.260589 | 1.286966 | 3.31057  | 0.000931  | 0.002978  | 0        | 0.547412 | 1.391463 | 13.39276 | 10.69555 | 11.05477 |
| 6151  | CHRNA2    | 10.15749 | 4.260478 | 1.040067 | 4.096349 | 4.20E-05  | 0.000181  | 0        | 1.642235 | 1.391463 | 22.32127 | 23.53022 | 12.05975 |
| 1775  | ADAM28    | 42.83312 | 4.258421 | 0.49974  | 8.521278 | 1.58E-17  | 2.36E-16  | 4.336691 | 5.474118 | 2.782925 | 64.73168 | 96.25998 | 83.4133  |
| 11045 | LOC103231 | 4.153876 | 4.25733  | 1.626513 | 2.617458 | 0.008859  | 0.021323  | 0        | 0.547412 | 0.695731 | 6.696381 | 14.97377 | 2.009959 |
| 9563  | LIM2      | 5.712358 | 4.257315 | 1.434083 | 2.968668 | 0.002991  | 0.008314  | 0        | 1.642235 | 0        | 4.464254 | 17.11289 | 11.05477 |
| 8423  | CUNH1orf  | 5.972608 | 4.25624  | 1.299382 | 3.275589 | 0.001054  | 0.003328  | 0        | 1.094824 | 0.695731 | 11.16063 | 12.83466 | 10.04979 |
| 4454  | DNAH9     | 25.9716  | 4.255381 | 0.844609 | 5.038287 | 4.70E-07  | 2.80E-06  | 0        | 1.094824 | 6.957314 | 62.49956 | 64.17332 | 21.10457 |
| 5328  | CRHR2     | 14.20018 | 4.2551   | 0.944472 | 4.50527  | 6.63E-06  | 3.31E-05  | 1.626259 | 0.547412 | 2.087194 | 13.39276 | 53.47777 | 14.06971 |
| 53    | CRYAB     | 1028.178 | 4.254996 | 0.146126 | 29.11875 | 2.08E-186 | 1.04E-183 | 81.31296 | 113.8617 | 112.7085 | 1908.469 | 1982.956 | 1969.76  |
| 8638  | LOC119621 | 5.763114 | 4.254807 | 1.322249 | 3.217855 | 0.001292  | 0.003975  | 1.084173 | 0.547412 | 0        | 8.928508 | 14.97377 | 9.044815 |
| 12365 | PON1      | 4.159899 | 4.254463 | 1.826855 | 2.328846 | 0.019867  | 0.042711  | 0        | 0.547412 | 0.695731 | 4.464254 | 19.252   | 0        |
| 12350 | LOC119621 | 4.106481 | 4.251121 | 1.821294 | 2.334121 | 0.019589  | 0.042169  | 0.542086 | 0        | 0.695731 | 0        | 21.39111 | 2.009959 |
| 8778  | LOC103221 | 5.784639 | 4.250214 | 1.336633 | 3.179791 | 0.001474  | 0.004464  | 1.084173 | 0.547412 | 0        | 8.928508 | 17.11289 | 7.034856 |
| 8696  | LOC119621 | 6.275909 | 4.248961 | 1.325915 | 3.204551 | 0.001353  | 0.004136  | 0        | 0.547412 | 1.391463 | 17.85702 | 12.83466 | 5.024897 |
| 7866  | ANKRD34C  | 8.649135 | 4.247865 | 1.230999 | 3.450747 | 0.000559  | 0.001889  | 0        | 0        | 2.782925 | 13.39276 | 25.66933 | 10.04979 |
| 9147  | HSD17B13  | 5.754521 | 4.247312 | 1.384764 | 3.067175 | 0.002161  | 0.00628   | 0.542086 | 1.094824 | 0        | 4.464254 | 21.39111 | 7.034856 |
| 11673 | MS4A2     | 4.383121 | 4.24693  | 1.71465  | 2.476849 | 0.013255  | 0.030187  | 0        | 0        | 1.391463 | 8.928508 | 14.97377 | 1.004979 |
| 301   | LOC103211 | 234.6052 | 4.246165 | 0.243174 | 17.46144 | 2.82E-68  | 2.49E-66  | 20.59928 | 18.612   | 32.00364 | 435.2648 | 494.1346 | 407.0167 |
| 9572  | LOC119611 | 6.041431 | 4.24449  | 1.430427 | 2.967289 | 0.003004  | 0.008344  | 1.084173 | 0        | 0.695731 | 8.928508 | 23.53022 | 2.009959 |
| 8626  | KRT75     | 5.983766 | 4.240753 | 1.31674  | 3.220645 | 0.001279  | 0.003942  | 0.542086 | 0.547412 | 0.695731 | 6.696381 | 21.39111 | 6.029877 |
| 3467  | CKNK10    | 33.68207 | 4.236841 | 0.719165 | 5.891335 | 3.83E-09  | 2.94E-08  | 1.626259 | 0.547412 | 8.348776 | 78.12444 | 81.28621 | 32.15934 |
| 4830  | HHLA1     | 21.2285  | 4.236174 | 0.883545 | 4.794518 | 1.63E-06  | 8.97E-06  | 0        | 1.094824 | 5.565851 | 46.87467 | 57.75599 | 16.07967 |
| 6607  | TRPV6     | 12.9737  | 4.235886 | 1.086231 | 3.899618 | 9.63E-05  | 0.000388  | 0        | 0        | 4.174388 | 20.08914 | 38.50399 | 15.07469 |
| 8347  | LOC103241 | 8.639655 | 4.235521 | 1.284539 | 3.297307 | 0.000976  | 0.003109  | 0        | 0        | 2.782925 | 8.928508 | 32.08666 | 8.039836 |
| 2867  | LOC103221 | 32.2868  | 4.234388 | 0.642677 | 6.588669 | 4.44E-11  | 4.12E-10  | 0.542086 | 3.831883 | 5.565851 | 84.82083 | 57.75599 | 41.20416 |
| 9314  | EPHA5     | 6.182005 | 4.23152  | 1.396572 | 3.029933 | 0.002446  | 0.006982  | 0.542086 | 0        | 1.391463 | 4.464254 | 25.66933 | 5.024897 |
| 11749 | LOC119621 | 3.702039 | 4.231455 | 1.720871 | 2.458904 | 0.013936  | 0.031534  | 0        | 1.094824 | 0        | 8.928508 | 2.139111 | 10.04979 |
| 6528  | LOC119621 | 10.44246 | 4.228862 | 1.076823 | 3.927167 | 8.60E-05  | 0.00035   | 0        | 0.547412 | 2.782925 | 29.01765 | 19.252   | 11.05477 |
| 7911  | TPP2      | 8.543649 | 4.224792 | 1.230013 | 3.434754 | 0.000593  | 0.001993  | 0        | 0        | 2.782925 | 22.32127 | 17.11289 | 9.044815 |
| 7817  | TESPA1    | 8.475616 | 4.221188 | 1.219498 | 3.461416 | 0.000537  | 0.001827  | 0        | 0        | 2.782925 | 15.62489 | 21.39111 | 11.05477 |
| 5925  | KCNAB1    | 11.82156 | 4.219872 | 1.005075 | 4.198563 | 2.69E-05  | 0.000121  | 1.084173 | 1.094824 | 1.391463 | 13.39276 | 44.92132 | 9.044815 |
| 4027  | SCN2B     | 24.88723 | 4.219847 | 0.788378 | 5.35257  | 8.67E-08  | 5.72E-07  | 0        | 1.642235 | 6.261582 | 49.10679 | 64.17332 | 28.13943 |
| 8106  | HPR       | 8.332473 | 4.219272 | 1.249049 | 3.377988 | 0.00073   | 0.002395  | 0        | 0.547412 | 2.087194 | 13.39276 | 29.94755 | 4.019918 |
| 5594  | CMTM5     | 16.93725 | 4.218812 | 0.964066 | 4.37606  | 1.21E-05  | 5.74E-05  | 0.542086 | 0        | 4.87012  | 44.64254 | 38.50399 | 13.06473 |
| 6424  | LOC103211 | 14.87465 | 4.218565 | 1.062465 | 3.970546 | 7.17E-05  | 0.000297  | 0        | 0.547412 | 4.174388 | 35.71403 | 42.78221 | 6.029877 |
| 15070 | LOC103221 | 2.143558 | 4.217842 | 2.315374 | 1.821668 | 0.068505  | 0.12085   | 0        | 0        | 0.695731 | 11.16063 | 0        | 1.004979 |
| 5855  | LOC119621 | 12.12167 | 4.217578 | 0.994061 | 4.242777 | 2.21E-05  | 0.0001    | 0        | 1.094824 | 2.782925 | 13.39276 | 36.36488 | 19.09461 |
| 14767 | FGF17     | 2.10653  | 4.215827 | 2.244229 | 1.878519 | 0.06031   | 0.108576  | 0        | 0        | 0.695731 | 8.928508 | 0        | 3.014938 |
| 15035 | FAM166C   | 1.995446 | 4.215703 | 2.30744  | 1.827005 | 0.067699  | 0.11971   | 0        | 0        | 0.695731 | 2.232127 | 0        | 9.044815 |
| 11134 | CCL11     | 4.145026 | 4.214446 | 1.623663 | 2.595641 | 0.009441  | 0.022544  | 0        | 0        | 1.391463 | 11.16063 | 4.278221 | 8.039836 |
| 5957  | LOC119621 | 12.40344 | 4.212768 | 1.007087 | 4.183124 | 2.88E-05  | 0.000128  | 0        | 0.547412 | 3.478657 | 20.08914 | 34.22577 | 16.07967 |
| 13891 | PLA2G3    | 2.029279 | 4.211962 | 2.072615 | 2.032198 | 0.042134  | 0.080639  | 0        | 0.547412 | 0        | 4.464254 | 2.139111 | 5.024897 |
| 13892 | LOC103241 | 2.028391 | 4.211957 | 2.072844 | 2.03197  | 0.042157  | 0.080675  | 0.542086 | 0        | 0        | 4.464254 | 2.139111 | 5.024897 |
| 4765  | LOC103231 | 23.11369 | 4.211939 | 0.871272 | 4.834243 | 1.34E-06  | 7.46E-06  | 0.542086 | 0.547412 | 6.261582 | 69.19594 | 47.06043 | 15.07469 |
| 4265  | OVCH1     | 20.20295 | 4.211889 | 0.813108 | 5.179988 | 2.22E-07  | 1.38E-06  | 0        | 2.189647 | 4.174388 | 42.41041 | 51.33866 | 21.10457 |
| 6156  | LOC103221 | 12.462   | 4.209607 | 1.028217 | 4.094083 | 4.24E-05  | 0.000183  | 0        | 0.547412 | 3.478657 | 22.32127 | 36.36488 | 12.05975 |
| 7112  | SEC14L3   | 7.880636 | 4.208828 | 1.139755 | 3.692748 | 0.000222  | 0.000829  | 0        | 1.094824 | 1.391463 | 15.62489 | 17.11289 | 12.05975 |
| 11183 | OPALIN    | 4.076992 | 4.20732  | 1.627546 | 2.585071 | 0.009736  | 0.023145  | 0        | 0        | 1.391463 | 4.464254 | 8.556443 | 10.04979 |
| 6283  | LOC119621 | 9.748441 | 4.206163 | 1.042112 | 4.036192 | 5.43E-05  | 0.00023   | 0        | 1.642235 | 1.391463 | 17.85702 | 23.53022 | 14.06971 |
| 8369  | LOC119621 | 8.450633 | 4.205306 | 1.276985 | 3.293151 | 0.000991  | 0.003147  | 0        | 0        | 2.782925 | 8.928508 | 29.94755 | 9.044815 |
| 4314  | LOC103231 | 19.88974 | 4.204678 | 0.81708  | 5.145983 | 2.66E-07  | 1.64E-06  | 0        | 2.737059 | 3.478657 | 49.10679 | 44.92132 | 19.09461 |
| 11823 | LOC103241 | 3.788141 | 4.203645 | 1.720428 | 2.443371 | 0.014551  | 0.032719  | 0        | 1.094824 | 0        | 8.928508 | 10.69555 | 2.009959 |
| 13941 | KRTAP4-3  | 2.012889 | 4.203573 | 2.075784 | 2.025054 | 0.042862  | 0.081736  | 0.542086 | 0        | 0        | 2.232127 | 4.278221 | 5.024897 |
| 13918 | CUNH22orf | 2.066307 | 4.203336 | 2.073504 | 2.027166 | 0.042645  | 0.081434  | 0        | 0.547412 | 0        | 6.696381 | 2.139111 | 3.014938 |
| 13919 | LIPN      | 2.066307 | 4.203336 | 2.073504 | 2.027166 | 0.042645  | 0.081434  | 0        | 0.547412 | 0        | 6.696381 | 2.139111 | 3.014938 |
| 13920 | TLR8      | 2.066307 | 4.203336 | 2.073504 | 2.027166 | 0.042645  | 0.081434  | 0        | 0.547412 | 0        | 6.696381 | 2.139111 | 3.014938 |
| 13921 | IGSF6     | 2.066307 | 4.203336 | 2.073504 | 2.027166 | 0.042645  | 0.081434  | 0        | 0.547412 | 0        | 6.696381 | 2.139111 | 3.014938 |
| 13922 | LOC119621 | 2.066307 | 4.203336 | 2.073504 | 2.027166 | 0.042645  | 0.081434  | 0        | 0.547412 | 0        | 6.696381 | 2.139111 | 3.014938 |
| 10828 | LOC103241 | 3.943329 | 4.202352 | 1.576739 | 2.665218 | 0.007694  | 0.01889   | 0        | 0.547412 | 0.695731 | 6.696381 | 10.69555 | 5.024897 |
| 11337 | TRNAC-GC  | 3.802756 | 4.201928 | 1.648453 | 2.549013 | 0.010803  | 0.025332  | 0.542086 | 0.547412 | 0        | 11.16063 | 8.556443 | 2.009959 |
| 6008  | ADAMTS2C  | 12.1798  | 4.201513 | 1.009836 | 4.160589 | 3.17E-05  | 0.00014   | 0        | 1.094824 | 2.782925 | 33.4819  | 25.66933 | 10.04979 |
| 7530  | LOC119621 | 9.558789 | 4.201327 | 1.183824 | 3.548946 | 0.000387  | 0.001366  | 0        | 2.189647 | 0.695731 | 8.928508 | 38.50399 | 7.034856 |
| 11189 | SLC39A12  | 4.098518 | 4.201118 | 1.625442 | 2.584601 | 0.009749  | 0.023164  | 0        | 0        | 1.391463 | 4.464254 | 10.69555 | 8.039836 |
| 8952  | LOC119621 | 5.863665 | 4.200902 | 1.341904 | 3.130553 | 0.001745  | 0.005182  | 0        | 1.094824 | 0.695731 | 13.39276 | 14.97377 | 5.024897 |
| 3622  | CXCR4     | 32.925   | 4.200761 | 0.73474  | 5.717343 | 1.08E-08  | 7.94E-08  | 0        | 1.642235 | 9.044508 | 69.19594 | 51.33866 | 66.32864 |
| 14874 | CRYBB2    | 2.001468 | 4.200727 | 2.259962 | 1.85876  | 0.063061  | 0.112712  | 0        | 0        | 0.695731 | 0        | 4.278221 | 7.034856 |
| 8876  | LOC103221 | 5.811134 | 4.199974 | 1.333679 | 3.149164 | 0.001637  | 0.004904  | 0        | 1.094824 | 0.695731 | 8.928508 | 17.11289 | 7.034856 |
| 11554 | FGF16     | 4.039964 | 4.199869 | 1.677446 | 2.503729 | 0.012289  | 0.028277  | 0        | 0        | 1.391463 | 2.232127 | 8.556443 | 12.05975 |
| 14242 | CCLA2B    | 2.128055 | 4.198431 | 2.132566 | 1.968723 | 0.048985  | 0.091426  | 0        | 0.695731 | 8.928508 | 2.139111 | 1.004979 |          |
| 14244 | RLN3      | 2.128055 | 4.198431 | 2.132566 | 1.968723 | 0.048985  | 0.091426  | 0        | 0        | 0.695731 | 8.928508 | 2.139111 | 1.004979 |
| 8158  | LOC       |          |          |          |          |           |           |          |          |          |          |          |          |



|       |          |          |          |          |          |           |           |          |          |          |            |          |          |
|-------|----------|----------|----------|----------|----------|-----------|-----------|----------|----------|----------|------------|----------|----------|
| 5995  | CR1      | 12.14879 | 4.198375 | 1.0077   | 4.166295 | 3.10E-05  | 0.000137  | 0        | 1.094824 | 2.782925 | 29.01765   | 29.94755 | 10.04979 |
| 5069  | CACNB2   | 18.04    | 4.198181 | 0.903035 | 4.648971 | 3.34E-06  | 1.75E-05  | 0        | 2.189647 | 3.478657 | 40.17829   | 51.33866 | 11.05477 |
| 5882  | TTL10    | 12.09626 | 4.197403 | 0.993504 | 4.22485  | 2.39E-05  | 0.000108  | 0        | 1.094824 | 2.782925 | 24.5534    | 32.08666 | 12.05975 |
| 11531 | FAM71C   | 4.225104 | 4.196087 | 1.673574 | 2.507261 | 0.012167  | 0.028051  | 0        | 0        | 1.391463 | 13.39276   | 8.556443 | 2.009959 |
| 5484  | LOC10323 | 14.20881 | 4.195144 | 0.949916 | 4.416332 | 1.00E-05  | 4.87E-05  | 0        | 1.094824 | 3.478657 | 31.24978   | 36.36488 | 13.06473 |
| 13808 | LOC11962 | 2.050804 | 4.194299 | 2.050115 | 2.045885 | 0.040768  | 0.07848   | 0        | 0.547412 | 0        | 4.464254   | 4.278221 | 3.014938 |
| 13809 | LOC10324 | 2.050804 | 4.194299 | 2.050115 | 2.045885 | 0.040768  | 0.07848   | 0        | 0.547412 | 0        | 4.464254   | 4.278221 | 3.014938 |
| 13810 | NPPA     | 2.050804 | 4.194299 | 2.050115 | 2.045885 | 0.040768  | 0.07848   | 0        | 0.547412 | 0        | 4.464254   | 4.278221 | 3.014938 |
| 12894 | LOC10321 | 4.277635 | 4.1923   | 1.888456 | 2.219961 | 0.026421  | 0.054472  | 0        | 0        | 1.391463 | 17.85702   | 6.417332 | 0        |
| 5576  | LOC10323 | 14.17781 | 4.191969 | 0.956446 | 4.382862 | 1.17E-05  | 5.58E-05  | 0        | 1.094824 | 3.478657 | 26.78552   | 40.6431  | 13.06473 |
| 14859 | LOC10322 | 1.998274 | 4.190613 | 2.252259 | 1.860627 | 0.062797  | 0.112353  | 0        | 0.547412 | 0        | 0          | 6.417332 | 5.024897 |
| 49    | LOC10323 | 989.772  | 4.190044 | 0.139242 | 30.09178 | 6.21E-199 | 3.37E-196 | 95.4072  | 119.3358 | 93.228   | 1866.058   | 1796.853 | 1967.75  |
| 14125 | GALNTL5  | 2.087832 | 4.187719 | 2.105526 | 1.988919 | 0.04671   | 0.087914  | 0        | 0.547412 | 0        | 6.696381   | 4.278221 | 1.004979 |
| 14100 | CNR2     | 2.112552 | 4.18731  | 2.099494 | 1.994438 | 0.046104  | 0.086928  | 0        | 0        | 0.695731 | 6.696381   | 4.278221 | 1.004979 |
| 13983 | LOC10324 | 2.035302 | 4.186335 | 2.079185 | 2.01345  | 0.044067  | 0.083782  | 0        | 0.547412 | 0        | 2.232127   | 6.417332 | 3.014938 |
| 13958 | LOC11962 | 2.060021 | 4.186228 | 2.072889 | 2.019513 | 0.043434  | 0.082714  | 0        | 0        | 0.695731 | 2.232127   | 6.417332 | 3.014938 |
| 13959 | LOC10323 | 2.060021 | 4.186228 | 2.072889 | 2.019513 | 0.043434  | 0.082714  | 0        | 0        | 0.695731 | 2.232127   | 6.417332 | 3.014938 |
| 13960 | LOC11962 | 2.060021 | 4.186228 | 2.072889 | 2.019513 | 0.043434  | 0.082714  | 0        | 0        | 0.695731 | 2.232127   | 6.417332 | 3.014938 |
| 4950  | GTSF1    | 13.62845 | 4.186089 | 0.888051 | 4.713793 | 2.43E-06  | 1.31E-05  | 0.542086 | 1.642235 | 2.087194 | 33.4819    | 29.94755 | 14.06971 |
| 12136 | LOC11962 | 628.3651 | 4.185661 | 1.75956  | 2.378811 | 0.017369  | 0.03805   | 0.542086 | 6.02153  | 189.9347 | 1354.901   | 1627.863 | 590.9279 |
| 8160  | LOC10324 | 8.345147 | 4.185356 | 1.245177 | 3.361253 | 0.000776  | 0.002528  | 0        | 0        | 2.782925 | 17.85702   | 21.39111 | 8.039836 |
| 7035  | LOC10324 | 10.20347 | 4.185076 | 1.12469  | 3.721091 | 0.000198  | 0.00075   | 0        | 0.547412 | 2.782925 | 15.62489   | 34.22577 | 8.039836 |
| 7202  | LOC10324 | 9.775564 | 4.184585 | 1.14141  | 3.666152 | 0.000246  | 0.000909  | 0        | 1.642235 | 1.391463 | 33.4819    | 17.11289 | 5.024897 |
| 11677 | CCL20    | 4.178596 | 4.181314 | 1.688776 | 2.475943 | 0.013288  | 0.030253  | 0        | 0        | 1.391463 | 6.696381   | 14.97377 | 2.009959 |
| 14955 | C1QTNF7  | 2.019799 | 4.17979  | 2.266172 | 1.844428 | 0.065121  | 0.115763  | 0        | 0.547412 | 0        | 0          | 8.556443 | 3.014938 |
| 14917 | LOC10321 | 2.044519 | 4.17972  | 2.258367 | 1.850771 | 0.064203  | 0.114406  | 0        | 0        | 0.695731 | 0          | 8.556443 | 3.014938 |
| 14918 | LOC11962 | 2.044519 | 4.17972  | 2.258367 | 1.850771 | 0.064203  | 0.114406  | 0        | 0        | 0.695731 | 0          | 8.556443 | 3.014938 |
| 14919 | LOC10322 | 2.044519 | 4.17972  | 2.258367 | 1.850771 | 0.064203  | 0.114406  | 0        | 0        | 0.695731 | 0          | 8.556443 | 3.014938 |
| 14170 | LOC11961 | 2.071442 | 4.178996 | 2.10848  | 1.981995 | 0.04748   | 0.089068  | 0.542086 | 0        | 0        | 4.464254   | 6.417332 | 1.004979 |
| 14164 | LOC11962 | 2.07233  | 4.178982 | 2.108259 | 1.982196 | 0.047457  | 0.089062  | 0        | 0.547412 | 0        | 4.464254   | 6.417332 | 1.004979 |
| 14166 | SECTM1   | 2.07233  | 4.178982 | 2.108259 | 1.982196 | 0.047457  | 0.089062  | 0        | 0.547412 | 0        | 4.464254   | 6.417332 | 1.004979 |
| 532   | CERS4    | 119.8754 | 4.178622 | 0.293191 | 14.25222 | 4.34E-46  | 2.17E-44  | 11.38381 | 13.13788 | 13.2189  | 229.9091   | 222.4675 | 229.1353 |
| 14132 | LOC11962 | 2.097049 | 4.178589 | 2.102159 | 1.987761 | 0.046838  | 0.088074  | 0        | 0        | 0.695731 | 4.464254   | 6.417332 | 1.004979 |
| 14133 | USP29    | 2.097049 | 4.178589 | 2.102159 | 1.987761 | 0.046838  | 0.088074  | 0        | 0        | 0.695731 | 4.464254   | 6.417332 | 1.004979 |
| 14134 | LOC10321 | 2.097049 | 4.178589 | 2.102159 | 1.987761 | 0.046838  | 0.088074  | 0        | 0        | 0.695731 | 4.464254   | 6.417332 | 1.004979 |
| 14135 | LOC10321 | 2.097049 | 4.178589 | 2.102159 | 1.987761 | 0.046838  | 0.088074  | 0        | 0        | 0.695731 | 4.464254   | 6.417332 | 1.004979 |
| 14136 | LOC10323 | 2.097049 | 4.178589 | 2.102159 | 1.987761 | 0.046838  | 0.088074  | 0        | 0        | 0.695731 | 4.464254   | 6.417332 | 1.004979 |
| 14137 | TAS2R8   | 2.097049 | 4.178589 | 2.102159 | 1.987761 | 0.046838  | 0.088074  | 0        | 0        | 0.695731 | 4.464254   | 6.417332 | 1.004979 |
| 14138 | LOC11962 | 2.097049 | 4.178589 | 2.102159 | 1.987761 | 0.046838  | 0.088074  | 0        | 0        | 0.695731 | 4.464254   | 6.417332 | 1.004979 |
| 9915  | LOC11962 | 6.273646 | 4.177607 | 1.450124 | 2.880862 | 0.003966  | 0.010633  | 0        | 0        | 2.087194 | 11.16063   | 21.39111 | 3.014938 |
| 9916  | ERICH6B  | 6.275646 | 4.177607 | 1.450124 | 2.880862 | 0.003966  | 0.010633  | 0        | 0        | 2.087194 | 11.16063   | 21.39111 | 3.014938 |
| 4629  | COL6A5   | 19.59178 | 4.176966 | 0.847328 | 4.929572 | 8.24E-07  | 4.73E-06  | 0        | 2.737059 | 3.478657 | 51.33892   | 44.92132 | 15.07469 |
| 5892  | HIF3A    | 11.69952 | 4.17694  | 0.989894 | 4.219585 | 2.45E-05  | 0.00011   | 0        | 1.642235 | 2.087194 | 22.32127   | 32.08666 | 12.05975 |
| 6158  | LOC10324 | 11.97952 | 4.17685  | 1.020334 | 4.093609 | 4.25E-05  | 0.000183  | 1.084173 | 0        | 2.782925 | 29.01765   | 29.94755 | 9.044815 |
| 10831 | ZIC4     | 32.29737 | 4.175618 | 1.567211 | 2.664363 | 0.007713  | 0.018933  | 0        | 0.547412 | 9.740239 | 62.49956   | 89.84265 | 31.15436 |
| 6510  | UBXN10   | 9.98088  | 4.17487  | 1.06099  | 3.934882 | 8.32E-05  | 0.00034   | 0        | 0.547412 | 2.782925 | 20.08914   | 21.39111 | 15.07469 |
| 7509  | TLX2     | 7.973389 | 4.173504 | 1.173878 | 3.555313 | 0.000378  | 0.001337  | 0        | 0.547412 | 2.087194 | 22.32127   | 12.83466 | 10.04979 |
| 7062  | UPB1     | 10.14361 | 4.172349 | 1.125673 | 3.706538 | 0.00021   | 0.000791  | 0.542086 | 0        | 2.782925 | 31.24978   | 19.252   | 7.034856 |
| 14400 | CD5      | 2.055939 | 4.172299 | 2.1472   | 1.943135 | 0.052     | 0.096001  | 0.542086 | 0        | 0        | 2.232127   | 8.556443 | 1.004979 |
| 14397 | LOC10321 | 2.056827 | 4.172287 | 2.146975 | 1.943333 | 0.051976  | 0.09597   | 0        | 0.547412 | 0        | 2.232127   | 8.556443 | 1.004979 |
| 14398 | LOC11961 | 2.056827 | 4.172287 | 2.146975 | 1.943333 | 0.051976  | 0.09597   | 0        | 0.547412 | 0        | 2.232127   | 8.556443 | 1.004979 |
| 14369 | LOC11962 | 2.081547 | 4.171936 | 2.140755 | 1.948815 | 0.051318  | 0.09493   | 0        | 0        | 0.695731 | 2.232127   | 8.556443 | 1.004979 |
| 14372 | PAGE1    | 2.081547 | 4.171936 | 2.140755 | 1.948815 | 0.051318  | 0.09493   | 0        | 0        | 0.695731 | 2.232127   | 8.556443 | 1.004979 |
| 5617  | LOC10322 | 13.92075 | 4.170208 | 0.955511 | 4.364375 | 1.27E-05  | 6.03E-05  | 0        | 1.094824 | 3.478657 | 20.08914   | 42.78221 | 16.07967 |
| 7714  | KPNA7    | 7.452889 | 4.16901  | 1.195024 | 3.488641 | 0.000485  | 0.001673  | 0        | 1.642235 | 0.695731 | 8.928508   | 21.39111 | 12.05975 |
| 5471  | LOC10322 | 16.09186 | 4.168706 | 0.941494 | 4.427754 | 9.52E-06  | 4.63E-05  | 0        | 1.094824 | 4.174388 | 29.01765   | 49.19955 | 13.06473 |
| 8173  | BTBD18   | 8.053468 | 4.164196 | 1.241232 | 3.354888 | 0.000794  | 0.002583  | 0        | 0.547412 | 2.087194 | 24.5534    | 17.11289 | 4.019918 |
| 12654 | LOC11962 | 4.089037 | 4.162833 | 1.834045 | 2.269756 | 0.023222  | 0.048788  | 0        | 0        | 1.391463 | 0          | 17.11289 | 6.029877 |
| 6085  | KCNA3    | 14.23955 | 4.162775 | 1.008326 | 4.128401 | 3.65E-05  | 0.00016   | 0        | 0.547412 | 4.174388 | 29.01765   | 40.6431  | 11.05477 |
| 4961  | SORCS1   | 15.72523 | 4.161631 | 0.883802 | 4.708784 | 2.49E-06  | 1.34E-05  | 0.542086 | 1.094824 | 3.478657 | 31.24978   | 44.92132 | 13.06473 |
| 8683  | TMIGD2   | 8.058603 | 4.160452 | 1.296938 | 3.207903 | 0.001337  | 0.004094  | 0.542086 | 0        | 2.087194 | 22.32127   | 21.39111 | 2.009959 |
| 5829  | LOC10324 | 11.27523 | 4.160365 | 0.977001 | 4.258301 | 2.06E-05  | 9.39E-05  | 0        | 2.189647 | 1.391463 | 22.32127   | 25.66933 | 16.07967 |
| 6142  | OLFML1   | 11.806   | 4.156459 | 1.013556 | 4.10087  | 4.12E-05  | 0.000178  | 1.084173 | 0        | 2.782925 | 31.24978   | 25.66933 | 10.04979 |
| 5342  | MAPK15   | 13.78337 | 4.15619  | 0.924796 | 4.49417  | 6.98E-06  | 3.48E-05  | 0.542086 | 0.547412 | 3.478657 | 24.5534    | 38.50399 | 15.07469 |
| 8699  | EMCN     | 5.673755 | 4.156031 | 1.29734  | 3.203501 | 0.001358  | 0.004149  | 0.542086 | 0.547412 | 0.695731 | 13.39276   | 12.83466 | 6.029877 |
| 9712  | LOC10322 | 5.733196 | 4.154941 | 1.420067 | 2.925877 | 0.003435  | 0.0094    | 0        | 1.094824 | 0.695731 | 15.62489   | 14.97377 | 2.009959 |
| 9713  | P2RY12   | 5.733196 | 4.154941 | 1.420067 | 2.925877 | 0.003435  | 0.0094    | 0        | 1.094824 | 0.695731 | 15.62489   | 14.97377 | 2.009959 |
| 9285  | SOX1     | 6.022048 | 4.153132 | 1.368238 | 3.035386 | 0.002402  | 0.006878  | 0        | 0        | 2.087194 | 11.16063   | 12.83466 | 10.04979 |
| 9276  | LOC10324 | 5.696168 | 4.152404 | 1.366695 | 3.038281 | 0.002379  | 0.006819  | 0        | 1.094824 | 0.695731 | 13.39276   | 14.97377 | 4.019918 |
| 5830  | LOC11961 | 11.67082 | 4.15123  | 0.974948 | 4.257899 | 2.06E-05  | 9.41E-05  | 0.542086 | 0.547412 | 2.782925 | 17.85702   | 34.22577 | 14.06971 |
| 8243  | LOC11962 | 8.140623 | 4.150972 | 1.245546 | 3.332653 | 0.00086   | 0.002774  | 0        | 0        | 2.782925 | 15.62489   | 21.39111 | 9.044815 |
| 9502  | EPB42    | 6.096104 | 4.14911  | 1.39061  | 2.983663 | 0.002848  | 0.007968  | 0        | 0        | 2.087194 | 15.62489   | 12.83466 | 6.029877 |
| 9503  | LOC10324 | 6.096104 | 4.14911  | 1.39061  | 2.983663 | 0.002848  | 0.007968  | 0        | 0        | 2.087194 | 15.62489   | 12.83466 | 6.029877 |
| 5145  | HTR1B    | 13.33242 | 4.14895  | 0.900751 | 4.606101 | 4.10E-06  | 2.12E-05  | 0        | 1.642235 | 2.782925 | 26.78552</ |          |          |



|       |           |           |          |          |          |          |          |          |          |          |          |          |          |
|-------|-----------|-----------|----------|----------|----------|----------|----------|----------|----------|----------|----------|----------|----------|
| 7937  | LOC103221 | 10.311173 | 4.148485 | 1.210325 | 3.42758  | 0.000609 | 0.00204  | 0        | 0        | 3.478657 | 24.5534  | 27.80844 | 6.029877 |
| 11614 | CLEC1A    | 3.837843  | 4.147549 | 1.664946 | 2.491101 | 0.012735 | 0.029151 | 0        | 0.547412 | 0.695731 | 15.62489 | 2.139111 | 4.019918 |
| 9762  | CDX2      | 6.133132  | 4.146149 | 1.423212 | 2.913234 | 0.003577 | 0.009741 | 0        | 0        | 2.087194 | 17.85702 | 12.83466 | 4.019918 |
| 5544  | LOC103241 | 12.84895  | 4.145474 | 0.943583 | 4.393333 | 1.12E-05 | 5.35E-05 | 0        | 2.737059 | 1.391463 | 15.62489 | 34.22577 | 23.11453 |
| 9080  | LOC103221 | 7.20426   | 4.144434 | 1.341522 | 3.089351 | 0.002006 | 0.005873 | 0        | 2.189647 | 0        | 15.62489 | 21.39111 | 4.019918 |
| 9834  | CCN6      | 8.288735  | 4.141243 | 1.428879 | 2.898245 | 0.003753 | 0.010145 | 0        | 0        | 2.782925 | 24.5534  | 21.39111 | 1.004979 |
| 6957  | LOC103218 | 9.440995  | 4.140962 | 1.103308 | 3.753225 | 0.000175 | 0.000667 | 0        | 1.642235 | 1.391463 | 15.62489 | 29.94755 | 8.039836 |
| 4537  | WDFY4     | 18.97863  | 4.139989 | 0.829457 | 4.991201 | 6.00E-07 | 3.52E-06 | 0        | 2.737059 | 3.478657 | 26.78552 | 57.75599 | 23.11453 |
| 10880 | LOC119621 | 89.2995   | 4.138923 | 1.559683 | 2.653695 | 0.007962 | 0.019454 | 0.542086 | 0.547412 | 27.82925 | 165.1774 | 233.1631 | 108.5378 |
| 2417  | XKR7      | 41.45257  | 4.138645 | 0.570963 | 7.248539 | 4.21E-13 | 4.63E-12 | 1.084173 | 5.474118 | 6.957314 | 78.12444 | 104.8164 | 52.25893 |
| 5997  | MROH9     | 11.03944  | 4.138239 | 0.993493 | 4.165344 | 3.11E-05 | 0.000138 | 1.626259 | 1.094824 | 0.695731 | 31.24978 | 23.53022 | 8.039836 |
| 9676  | NLRP5     | 6.012568  | 4.137863 | 1.408787 | 2.937181 | 0.003312 | 0.009099 | 0        | 0        | 2.087194 | 6.696381 | 19.252   | 8.039836 |
| 253   | STR3      | 432.723   | 4.136307 | 0.225937 | 10.30733 | 7.23E-75 | 7.60E-73 | 38.48813 | 33.93953 | 68.87741 | 857.1368 | 748.6887 | 849.2077 |
| 5234  | LOC119621 | 24.44925  | 4.13623  | 0.906632 | 4.562192 | 5.06E-06 | 2.57E-05 | 0        | 0.547412 | 7.653045 | 69.19594 | 49.19955 | 20.09959 |
| 11825 | LOC103221 | 4.051585  | 4.135656 | 1.692867 | 2.442989 | 0.014566 | 0.032748 | 0        | 0        | 1.391463 | 15.62489 | 4.278221 | 3.014938 |
| 12662 | LOC103241 | 4.104116  | 4.134256 | 1.822945 | 2.2679   | 0.023335 | 0.048995 | 0        | 0        | 1.391463 | 20.08914 | 2.139111 | 1.004979 |
| 4796  | OTOL1     | 28.22808  | 4.133707 | 0.858239 | 4.816497 | 1.46E-06 | 8.10E-06 | 0        | 1.094824 | 8.348776 | 49.10679 | 87.70354 | 23.11453 |
| 7632  | LOC103231 | 9.952015  | 4.133075 | 1.175955 | 3.514653 | 0.00044  | 0.001534 | 0        | 0.547412 | 2.782925 | 24.5534  | 27.80844 | 4.019918 |
| 10318 | SAMD3     | 6.123652  | 4.132777 | 1.484206 | 2.784504 | 0.005361 | 0.013813 | 0        | 0        | 2.087194 | 13.39276 | 19.252   | 2.009959 |
| 11676 | LOC103221 | 4.036083  | 4.132461 | 1.668826 | 2.476268 | 0.013276 | 0.030229 | 0        | 0        | 1.391463 | 13.39276 | 6.417332 | 3.014938 |
| 7935  | FMO1      | 7.285393  | 4.131392 | 1.204869 | 3.428914 | 0.000606 | 0.00203  | 0        | 1.642235 | 0.695731 | 8.928508 | 21.39111 | 11.05477 |
| 5167  | ABCB11    | 15.39459  | 4.130145 | 0.898834 | 4.595003 | 4.33E-06 | 2.23E-05 | 0        | 1.642235 | 3.478657 | 37.94616 | 34.22577 | 15.07469 |
| 12285 | LOC119621 | 3.664749  | 4.130052 | 1.759224 | 2.347655 | 0.018892 | 0.040883 | 0        | 0.547412 | 0.695731 | 0        | 10.69555 | 10.04979 |
| 2111  | ADH7      | 36.62113  | 4.129945 | 0.530717 | 7.781823 | 7.15E-15 | 9.00E-14 | 4.336691 | 3.284471 | 4.174388 | 66.96381 | 87.70354 | 53.26391 |
| 5381  | EIF4E1B   | 17.77341  | 4.128875 | 0.92277  | 4.474435 | 7.66E-06 | 3.79E-05 | 0        | 1.094824 | 4.87012  | 49.10679 | 38.50399 | 13.06473 |
| 7484  | FOLH1B    | 7.374064  | 4.128284 | 1.157059 | 3.567912 | 0.00036  | 0.001278 | 0.542086 | 1.094824 | 0.695731 | 15.62489 | 19.252   | 7.034856 |
| 4547  | FOXL2NB   | 19.15492  | 4.12777  | 0.829148 | 4.978329 | 6.41E-07 | 3.75E-06 | 0        | 2.189647 | 4.174388 | 42.41041 | 47.06043 | 19.09461 |
| 12022 | LOC103221 | 3.583616  | 4.127676 | 1.717999 | 2.402607 | 0.016279 | 0.035998 | 0        | 1.094824 | 0        | 6.696381 | 10.69555 | 3.014938 |
| 8055  | LOC119621 | 12.30931  | 4.125374 | 1.214246 | 3.397478 | 0.00068  | 0.002245 | 0        | 0        | 4.174388 | 35.71403 | 29.94755 | 4.019918 |
| 6171  | DCC       | 13.89854  | 4.125289 | 1.008801 | 4.0893   | 4.33E-05 | 0.000186 | 0        | 0.547412 | 4.174388 | 31.24978 | 36.36488 | 11.05477 |
| 1587  | CASP1     | 50.84169  | 4.123956 | 0.457928 | 9.005694 | 2.14E-19 | 3.59E-18 | 3.252518 | 7.116354 | 6.261582 | 82.5887  | 113.3729 | 92.45811 |
| 5539  | CCBE1     | 15.66599  | 4.123556 | 0.937929 | 4.396448 | 1.10E-05 | 5.28E-05 | 0.542086 | 0.547412 | 4.174388 | 40.17829 | 38.50399 | 10.04979 |
| 6676  | SMIM28    | 9.258791  | 4.122808 | 1.066262 | 3.866601 | 0.00011  | 0.000439 | 1.626259 | 0        | 1.391463 | 20.08914 | 21.39111 | 11.05477 |
| 7581  | LOC103241 | 10.03315  | 4.122346 | 1.166934 | 3.53263  | 0.000411 | 0.001443 | 0        | 0        | 3.478657 | 17.85702 | 27.80844 | 11.05477 |
| 7525  | LOC103221 | 9.99612   | 4.122231 | 1.161032 | 3.550489 | 0.000385 | 0.001358 | 0        | 0        | 3.478657 | 15.62489 | 27.80844 | 13.06473 |
| 5423  | LOC103231 | 12.98476  | 4.121215 | 0.926274 | 4.449238 | 8.62E-06 | 4.22E-05 | 0        | 2.189647 | 2.087194 | 22.32127 | 34.22577 | 17.08465 |
| 11591 | LOC119618 | 3.797358  | 4.119047 | 1.650091 | 2.496255 | 0.012551 | 0.028783 | 0        | 0.547412 | 0.695731 | 6.696381 | 12.83466 | 2.009959 |
| 11592 | LOC103218 | 3.797358  | 4.119047 | 1.650091 | 2.496255 | 0.012551 | 0.028783 | 0        | 0.547412 | 0.695731 | 6.696381 | 12.83466 | 2.009959 |
| 9066  | LOC103241 | 5.446818  | 4.118857 | 1.332508 | 3.091055 | 0.001994 | 0.005848 | 1.084173 | 0        | 0.695731 | 11.16063 | 10.69555 | 9.044815 |
| 11722 | IL27      | 3.989574  | 4.118074 | 1.670736 | 2.464827 | 0.013708 | 0.031089 | 0        | 0        | 1.391463 | 6.696381 | 12.83466 | 3.014938 |
| 12195 | LOC119621 | 4.042105  | 4.118068 | 1.739324 | 2.367626 | 0.017903 | 0.039028 | 0        | 0        | 1.391463 | 11.16063 | 10.69555 | 1.004979 |
| 6306  | FNDC1     | 13.09238  | 4.116472 | 1.023138 | 4.023381 | 5.74E-05 | 0.000242 | 0        | 2.189647 | 2.087194 | 22.32127 | 44.92132 | 7.034856 |
| 11904 | LOC103231 | 3.974072  | 4.111429 | 1.696216 | 2.423882 | 0.015356 | 0.034296 | 0        | 0        | 1.391463 | 4.464254 | 14.97377 | 3.014938 |
| 12014 | LOC103221 | 3.937044  | 4.111235 | 1.710132 | 2.404046 | 0.016215 | 0.035881 | 0        | 0        | 1.391463 | 2.232127 | 14.97377 | 5.024897 |
| 13187 | NEUROD1   | 20.89131  | 4.11042  | 1.892662 | 2.171766 | 0.029873 | 0.060225 | 0        | 0        | 6.957314 | 58.0353  | 34.22577 | 26.12947 |
| 3900  | GRIA1     | 32.87046  | 4.108667 | 0.754779 | 5.443536 | 5.22E-08 | 3.56E-07 | 0        | 2.737059 | 8.348776 | 71.42806 | 85.56443 | 29.1444  |
| 7268  | CLDN18    | 9.725965  | 4.107583 | 1.126889 | 3.645065 | 0.000267 | 0.000978 | 0        | 0.547412 | 2.782925 | 22.32127 | 25.66933 | 7.034856 |
| 3401  | LOC103231 | 40.24405  | 4.106717 | 0.690859 | 5.944362 | 2.78E-09 | 2.17E-08 | 0        | 7.663765 | 5.565851 | 91.51721 | 100.5382 | 36.17926 |
| 4145  | LOC103221 | 27.00574  | 4.104512 | 0.780214 | 5.260754 | 1.43E-07 | 9.20E-07 | 0.542086 | 1.642235 | 6.957314 | 82.5887  | 49.19955 | 21.10457 |
| 9263  | DRD2      | 5.66747   | 4.1039   | 1.349623 | 3.040775 | 0.00236  | 0.006772 | 0.542086 | 0        | 1.391463 | 8.928508 | 17.11289 | 6.029877 |
| 9405  | LOC119621 | 5.720888  | 4.102534 | 1.364755 | 3.00606  | 0.002647 | 0.007481 | 0        | 0.547412 | 1.391463 | 13.39276 | 14.97377 | 4.019918 |
| 9827  | LOC103218 | 5.495891  | 4.101396 | 1.414546 | 2.899444 | 0.003738 | 0.010113 | 1.084173 | 0        | 0.695731 | 8.928508 | 19.252   | 3.014938 |
| 12493 | SPRR1A    | 3.995597  | 4.101142 | 1.7811   | 2.302589 | 0.021302 | 0.045327 | 0        | 0        | 1.391463 | 4.464254 | 17.11289 | 1.004979 |
| 12494 | LOC119621 | 3.995597  | 4.101142 | 1.7811   | 2.302589 | 0.021302 | 0.045327 | 0        | 0        | 1.391463 | 4.464254 | 17.11289 | 1.004979 |
| 8940  | SOWAHB    | 6.92568   | 4.100029 | 1.308072 | 3.134405 | 0.001722 | 0.005121 | 0        | 2.189647 | 0        | 8.928508 | 21.39111 | 9.044815 |
| 9825  | LOC119621 | 5.928607  | 4.099741 | 1.413729 | 2.899949 | 0.003732 | 0.010099 | 0        | 0        | 2.087194 | 15.62489 | 12.83466 | 5.024897 |
| 8199  | TTC24     | 7.674536  | 4.098809 | 1.224884 | 3.346284 | 0.000819 | 0.002656 | 0.542086 | 0        | 2.087194 | 24.5534  | 12.83466 | 6.029877 |
| 4271  | RHAG      | 18.78908  | 4.098387 | 0.791702 | 5.176682 | 2.26E-07 | 1.41E-06 | 0.542086 | 1.094824 | 4.87012  | 29.01765 | 47.06043 | 30.14938 |
| 8570  | SALL3     | 7.504733  | 4.098073 | 1.266011 | 3.236997 | 0.001208 | 0.003747 | 0        | 1.094824 | 1.391463 | 24.5534  | 14.97377 | 3.014938 |
| 7678  | GML       | 9.896656  | 4.098012 | 1.171301 | 3.498684 | 0.000468 | 0.001619 | 0        | 0        | 3.478657 | 22.32127 | 23.53022 | 10.04979 |
| 1561  | LOC103231 | 67.31045  | 4.095727 | 0.452019 | 9.060958 | 1.29E-19 | 2.20E-18 | 10.84173 | 2.737059 | 9.044508 | 111.6063 | 104.8164 | 164.8166 |
| 7710  | BIN2      | 9.881154  | 4.095676 | 1.17393  | 3.488858 | 0.000485 | 0.001673 | 0        | 0        | 3.478657 | 20.08914 | 25.66933 | 10.04979 |
| 5498  | CSF2RB    | 13.03614  | 4.093867 | 0.928129 | 4.410883 | 1.03E-05 | 4.98E-05 | 0.542086 | 1.094824 | 2.782925 | 20.08914 | 40.6431  | 13.06473 |
| 8871  | LOC119618 | 7.494365  | 4.093534 | 1.299223 | 3.150754 | 0.001628 | 0.004488 | 0.542086 | 0.547412 | 1.391463 | 20.08914 | 21.39111 | 1.004979 |
| 6031  | LOC119618 | 10.98046  | 4.085645 | 0.984336 | 4.150662 | 3.32E-05 | 0.000146 | 0        | 1.642235 | 2.087194 | 24.5534  | 23.53022 | 14.06971 |
| 4143  | SCML4     | 20.2296   | 4.084844 | 0.776326 | 5.261764 | 1.43E-07 | 9.16E-07 | 0        | 2.737059 | 4.174388 | 42.41041 | 44.92132 | 27.13445 |
| 7272  | SMTNL1    | 9.567949  | 4.084507 | 1.120917 | 3.643898 | 0.000269 | 0.000982 | 0        | 0.547412 | 2.782925 | 26.78552 | 19.252   | 8.039836 |
| 12342 | KLF1      | 3.31274   | 4.084036 | 1.748278 | 2.336033 | 0.01949  | 0.041981 | 1.084173 | 0        | 0        | 4.464254 | 4.278221 | 10.04979 |
| 6047  | MYBPC1    | 11.12015  | 4.083966 | 0.985172 | 4.145434 | 3.39E-05 | 0.000149 | 0        | 1.094824 | 2.782925 | 20.08914 | 25.66933 | 17.08465 |
| 5769  | SLC7A3    | 10.94857  | 4.083755 | 0.9523   | 4.288307 | 1.80E-05 | 8.30E-05 | 0.542086 | 1.094824 | 2.087194 | 20.08914 | 27.80844 | 14.06971 |
| 5070  | MYPN      | 21.17136  | 4.083424 | 0.878572 | 4.647795 | 3.36E-06 | 1.76E-05 | 0        | 1.094824 | 6.261582 | 31.24978 | 66.31243 | 22.10955 |
| 8506  | WNT8B     | 7.374688  | 4.082139 | 1.254049 | 3.255166 | 0.001133 | 0.003542 | 0        | 1.094824 | 1.391463 | 8.928508 | 27.80844 | 5.024897 |
| 7104  | PRAMEF10  | 9.483525  | 4.081071 | 1.104551 | 3.694777 | 0.00022  | 0.000824 | 0.542086 | 0        |          |          |          |          |



|       |           |          |          |          |          |           |           |          |          |          |          |          |          |
|-------|-----------|----------|----------|----------|----------|-----------|-----------|----------|----------|----------|----------|----------|----------|
| 15297 | LOC119621 | 1.902005 | 4.079544 | 2.292374 | 1.779615 | 0.075139  | 0.130586  | 0        | 0        | 0.695731 | 6.696381 | 0        | 4.019918 |
| 4776  | CUNH14or  | 16.31409 | 4.078908 | 0.844983 | 4.827209 | 1.38E-06  | 7.71E-06  | 0        | 2.737059 | 2.782925 | 40.17829 | 32.08666 | 20.09959 |
| 6030  | LOC119621 | 10.99162 | 4.07801  | 0.982132 | 4.152201 | 3.29E-05  | 0.000145  | 0.542086 | 1.094824 | 2.087194 | 20.08914 | 32.08666 | 10.04979 |
| 15410 | LOC103231 | 1.939033 | 4.07752  | 2.318982 | 1.758323 | 0.078693  | 0.135732  | 0        | 0        | 0.695731 | 8.928508 | 0        | 2.009959 |
| 15411 | SLC26A3   | 1.939033 | 4.07752  | 2.318982 | 1.758323 | 0.078693  | 0.135732  | 0        | 0        | 0.695731 | 8.928508 | 0        | 2.009959 |
| 15412 | LOC119611 | 1.939033 | 4.07752  | 2.318982 | 1.758323 | 0.078693  | 0.135732  | 0        | 0        | 0.695731 | 8.928508 | 0        | 2.009959 |
| 8747  | LOC103231 | 7.80563  | 4.077112 | 1.278275 | 3.189541 | 0.001425  | 0.004331  | 0        | 0        | 2.782925 | 15.62489 | 21.39111 | 7.034856 |
| 10502 | ABHD16B   | 5.851094 | 4.07658  | 1.485719 | 2.743843 | 0.006072  | 0.015372  | 0        | 0        | 2.087194 | 4.464254 | 23.53022 | 5.024897 |
| 9706  | LOC103241 | 5.555962 | 4.073412 | 1.391543 | 2.927263 | 0.00342   | 0.009366  | 0.542086 | 0        | 1.391463 | 20.08914 | 4.278221 | 7.034856 |
| 5223  | SLC2A5    | 14.99387 | 4.071546 | 0.891121 | 4.569016 | 4.90E-06  | 2.49E-05  | 0.542086 | 0.547412 | 4.174388 | 31.24978 | 36.36488 | 17.08465 |
| 14544 | LOC119621 | 1.861782 | 4.071244 | 2.123594 | 1.917148 | 0.055219  | 0.100935  | 0        | 0.547412 | 0        | 4.464254 | 2.139111 | 4.019918 |
| 5821  | LOC103231 | 19.44564 | 4.071226 | 0.955085 | 4.262685 | 2.02E-05  | 9.22E-05  | 0        | 0.547412 | 6.261582 | 40.17829 | 55.61688 | 14.06971 |
| 13229 | HMGGB4    | 18.30984 | 4.071135 | 1.88174  | 2.163494 | 0.030503  | 0.061299  | 0        | 0        | 6.261582 | 46.87467 | 40.6431  | 16.07967 |
| 11537 | LOC103221 | 3.617816 | 4.06981  | 1.624094 | 2.505896 | 0.012214  | 0.028145  | 0        | 0.547412 | 0.695731 | 11.16063 | 4.278221 | 5.024897 |
| 11822 | KIAA1210  | 3.810033 | 4.069368 | 1.665434 | 2.443429 | 0.014548  | 0.032717  | 0        | 0        | 1.391463 | 11.16063 | 4.278221 | 6.029877 |
| 15766 | LOC103221 | 1.934951 | 4.069358 | 2.38324  | 1.70749  | 0.087731  | 0.147932  | 0.542086 | 0        | 0        | 8.928508 | 2.139111 | 0        |
| 15767 | LOC103221 | 1.934951 | 4.069358 | 2.38324  | 1.70749  | 0.087731  | 0.147932  | 0.542086 | 0        | 0        | 8.928508 | 2.139111 | 0        |
| 15761 | LOC103241 | 1.935838 | 4.06934  | 2.382943 | 1.707695 | 0.087693  | 0.147908  | 0        | 0.547412 | 0        | 8.928508 | 2.139111 | 0        |
| 15762 | LOC103231 | 1.935838 | 4.06934  | 2.382943 | 1.707695 | 0.087693  | 0.147908  | 0        | 0.547412 | 0        | 8.928508 | 2.139111 | 0        |
| 6059  | CHRM1     | 15.17387 | 4.069049 | 0.982571 | 4.141226 | 3.45E-05  | 0.000152  | 0        | 1.094824 | 4.174388 | 44.64254 | 32.08666 | 9.044815 |
| 11499 | LOC103211 | 3.549783 | 4.066571 | 1.616151 | 2.516207 | 0.011863  | 0.027426  | 0        | 0.547412 | 0.695731 | 4.464254 | 8.556443 | 7.034856 |
| 14062 | KLK11     | 26.50944 | 4.066024 | 2.031543 | 2.001447 | 0.045344  | 0.085726  | 0        | 0        | 9.044508 | 46.87467 | 77.00798 | 26.12947 |
| 5713  | LOC103221 | 19.25102 | 4.064785 | 0.941117 | 4.319106 | 1.57E-05  | 7.29E-05  | 0        | 0.547412 | 6.261582 | 24.5534  | 62.03421 | 22.10955 |
| 23    | LOC103221 | 1357.156 | 4.063381 | 0.113166 | 35.9063  | 2.44E-282 | 2.82E-279 | 151.7842 | 159.2968 | 148.1908 | 2526.768 | 2569.072 | 2587.822 |
| 6482  | TEX47     | 15.59921 | 4.063163 | 1.029437 | 3.946977 | 7.91E-05  | 0.000325  | 0        | 0        | 5.565851 | 35.71403 | 34.22577 | 18.08963 |
| 11820 | TLE7      | 3.741999 | 4.062923 | 1.662698 | 2.443573 | 0.014543  | 0.032709  | 0        | 0        | 1.391463 | 4.464254 | 8.556443 | 8.039836 |
| 14551 | LOC119611 | 1.871    | 4.062157 | 2.119748 | 1.916339 | 0.055322  | 0.101074  | 0        | 0        | 0.695731 | 2.232127 | 4.278221 | 4.019918 |
| 14648 | LOC119621 | 1.897923 | 4.061309 | 2.140428 | 1.897428 | 0.057771  | 0.104851  | 0.542086 | 0        | 0        | 6.696381 | 2.139111 | 2.009959 |
| 14646 | LOC119621 | 1.898881 | 4.061299 | 2.140175 | 1.897648 | 0.057743  | 0.104813  | 0        | 0.547412 | 0        | 6.696381 | 2.139111 | 2.009959 |
| 11461 | LOC103221 | 3.586811 | 4.060232 | 1.608484 | 2.52426  | 0.011594  | 0.026892  | 0        | 0.547412 | 0.695731 | 6.696381 | 8.556443 | 5.024897 |
| 12226 | LOC119621 | 3.410097 | 4.059915 | 1.719324 | 2.361344 | 0.018209  | 0.039594  | 0        | 1.094824 | 0        | 8.928508 | 6.417332 | 4.019918 |
| 11597 | SLC5A8    | 3.57042  | 4.05806  | 1.626347 | 2.495199 | 0.012589  | 0.028858  | 0.542086 | 0        | 0.695731 | 4.464254 | 10.69555 | 5.024897 |
| 5967  | LOC103241 | 10.42675 | 4.056972 | 0.970913 | 4.17851  | 2.93E-05  | 0.000131  | 1.084173 | 1.642235 | 0.695731 | 24.5534  | 23.53022 | 11.05477 |
| 15576 | PRR20G    | 1.945056 | 4.056475 | 2.341382 | 1.732513 | 0.083182  | 0.141929  | 0        | 0        | 0.695731 | 6.696381 | 4.278221 | 0        |
| 15579 | LOC103231 | 1.945056 | 4.056475 | 2.341382 | 1.732513 | 0.083182  | 0.141929  | 0        | 0        | 0.695731 | 6.696381 | 4.278221 | 0        |
| 15580 | LOC103231 | 1.945056 | 4.056475 | 2.341382 | 1.732513 | 0.083182  | 0.141929  | 0        | 0        | 0.695731 | 6.696381 | 4.278221 | 0        |
| 15581 | LOC119621 | 1.945056 | 4.056475 | 2.341382 | 1.732513 | 0.083182  | 0.141929  | 0        | 0        | 0.695731 | 6.696381 | 4.278221 | 0        |
| 8163  | SMC1B     | 7.439894 | 4.055687 | 1.207018 | 3.360087 | 0.000779  | 0.002538  | 0        | 0.547412 | 2.087194 | 17.85702 | 17.11289 | 7.034856 |
| 11876 | KNCN      | 3.763524 | 4.054665 | 1.667581 | 2.431466 | 0.015038  | 0.03366   | 0        | 0        | 1.391463 | 4.464254 | 10.69555 | 6.029877 |
| 11622 | LOC119621 | 3.623839 | 4.053896 | 1.629053 | 2.488499 | 0.012828  | 0.029345  | 0        | 0.547412 | 0.695731 | 8.928508 | 8.556443 | 3.014938 |
| 7840  | LOC103231 | 7.231287 | 4.053709 | 1.173035 | 3.455743 | 0.000549  | 0.001861  | 0.542086 | 0.547412 | 1.391463 | 15.62489 | 19.252   | 6.029877 |
| 8031  | LOC103231 | 7.054573 | 4.053181 | 1.190823 | 3.40368  | 0.000665  | 0.002201  | 0.542086 | 1.094824 | 0.695731 | 17.85702 | 17.11289 | 5.024897 |
| 7187  | LOC119621 | 11.37651 | 4.052137 | 1.104187 | 3.669791 | 0.000243  | 0.000898  | 0        | 0.547412 | 3.478657 | 37.94616 | 19.252   | 7.034856 |
| 12146 | TNFSF10   | 3.853083 | 4.051921 | 1.704969 | 2.376536 | 0.017476  | 0.038251  | 0        | 0        | 1.391463 | 11.16063 | 8.556443 | 2.009959 |
| 7764  | LOC103231 | 9.42109  | 4.051857 | 1.166171 | 3.474497 | 0.000512  | 0.001753  | 0.542086 | 0        | 2.782925 | 26.78552 | 21.39111 | 5.024897 |
| 14561 | LOC119621 | 1.883308 | 4.050913 | 2.117421 | 1.913135 | 0.055731  | 0.101751  | 0        | 0.547412 | 0        | 4.464254 | 4.278221 | 2.009959 |
| 8561  | SEZ6L     | 7.573557 | 4.050811 | 1.250861 | 3.238419 | 0.001202  | 0.003733  | 0        | 0        | 2.782925 | 15.62489 | 14.97377 | 12.05975 |
| 9810  | NANOGNB   | 5.553392 | 4.050795 | 1.39557  | 2.902611 | 0.003701  | 0.010029  | 0        | 0.547412 | 1.391463 | 13.39276 | 14.97377 | 3.014938 |
| 14529 | ADH4      | 1.908028 | 4.050631 | 2.110416 | 1.919352 | 0.05494   | 0.100494  | 0        | 0        | 0.695731 | 4.464254 | 4.278221 | 2.009959 |
| 14530 | LOC119621 | 1.908028 | 4.050631 | 2.110416 | 1.919352 | 0.05494   | 0.100494  | 0        | 0        | 0.695731 | 4.464254 | 4.278221 | 2.009959 |
| 14531 | LOC103211 | 1.908028 | 4.050631 | 2.110416 | 1.919352 | 0.05494   | 0.100494  | 0        | 0        | 0.695731 | 4.464254 | 4.278221 | 2.009959 |
| 14532 | LOC119621 | 1.908028 | 4.050631 | 2.110416 | 1.919352 | 0.05494   | 0.100494  | 0        | 0        | 0.695731 | 4.464254 | 4.278221 | 2.009959 |
| 14533 | VSTM2B    | 1.908028 | 4.050631 | 2.110416 | 1.919352 | 0.05494   | 0.100494  | 0        | 0        | 0.695731 | 4.464254 | 4.278221 | 2.009959 |
| 14534 | LINC02876 | 1.908028 | 4.050631 | 2.110416 | 1.919352 | 0.05494   | 0.100494  | 0        | 0        | 0.695731 | 4.464254 | 4.278221 | 2.009959 |
| 7674  | RPL3L     | 8.938506 | 4.050215 | 1.157144 | 3.500181 | 0.000465  | 0.001611  | 0        | 1.642235 | 1.391463 | 15.62489 | 29.94755 | 5.024897 |
| 15422 | LOC103231 | 1.855497 | 4.050214 | 2.305192 | 1.756996 | 0.078918  | 0.136043  | 0        | 0        | 0.695731 | 0        | 6.417332 | 4.019918 |
| 122   | LOC103211 | 494.7688 | 4.048483 | 0.17257  | 23.45991 | 1.05E-121 | 2.28E-119 | 47.16151 | 62.40495 | 59.8329  | 874.9938 | 1026.773 | 897.4467 |
| 8446  | SLC9C1    | 7.445916 | 4.048447 | 1.238099 | 3.269889 | 0.001076  | 0.003387  | 0        | 0.547412 | 2.087194 | 15.62489 | 21.39111 | 5.024897 |
| 5996  | LOC119621 | 12.94589 | 4.047767 | 0.971687 | 4.165709 | 3.10E-05  | 0.000138  | 0.542086 | 0.547412 | 3.478657 | 24.5534  | 38.50399 | 10.04979 |
| 6573  | DCAF8L1   | 10.89064 | 4.047478 | 1.034922 | 3.910903 | 9.20E-05  | 0.000372  | 0        | 1.094824 | 2.782925 | 11.16063 | 34.22577 | 16.07967 |
| 15691 | SOSTDC1   | 1.904833 | 4.046861 | 2.353789 | 1.719296 | 0.08556   | 0.144964  | 0        | 0.547412 | 0        | 4.464254 | 6.417332 | 0        |
| 15648 | SMPX      | 1.929553 | 4.046363 | 2.345371 | 1.725255 | 0.084482  | 0.143501  | 0        | 0        | 0.695731 | 4.464254 | 6.417332 | 0        |
| 15649 | LOC103241 | 1.929553 | 4.046363 | 2.345371 | 1.725255 | 0.084482  | 0.143501  | 0        | 0        | 0.695731 | 4.464254 | 6.417332 | 0        |
| 15650 | LOC119621 | 1.929553 | 4.046363 | 2.345371 | 1.725255 | 0.084482  | 0.143501  | 0        | 0        | 0.695731 | 4.464254 | 6.417332 | 0        |
| 15651 | TAS2R41   | 1.929553 | 4.046363 | 2.345371 | 1.725255 | 0.084482  | 0.143501  | 0        | 0        | 0.695731 | 4.464254 | 6.417332 | 0        |
| 8633  | SPDYE4    | 9.599116 | 4.046048 | 1.256716 | 3.219539 | 0.001284  | 0.003954  | 0        | 0        | 3.478657 | 6.696381 | 36.36488 | 11.05477 |
| 11833 | ZIM3      | 3.592833 | 4.044526 | 1.656869 | 2.441066 | 0.014644  | 0.0329    | 0        | 0.547412 | 0.695731 | 4.464254 | 12.83466 | 3.014938 |
| 7986  | SEL1L2    | 9.555641 | 4.042618 | 1.183218 | 3.41663  | 0.000634  | 0.002111  | 0        | 0        | 3.478657 | 24.5534  | 19.252   | 10.04979 |
| 7166  | RSP04     | 15.56433 | 4.042602 | 1.099805 | 3.675744 | 0.000237  | 0.00088   | 0        | 0        | 5.565851 | 42.41041 | 36.36488 | 9.044815 |
| 14733 | LOC119621 | 1.867805 | 4.042509 | 2.146822 | 1.88302  | 0.059698  | 0.107681  | 0        | 0.547412 | 0        | 2.232127 | 6.417332 | 2.009959 |
| 14734 | TMPRSS12  | 1.867805 | 4.042509 | 2.146822 | 1.88302  | 0.059698  | 0.107681  | 0        | 0.547412 | 0        | 2.232127 | 6.417332 | 2.009959 |
| 14736 | ASB18     | 1.867805 | 4.042509 | 2.146822 | 1.88302  | 0.059698  | 0.107681  | 0        | 0.547412 | 0        | 2.232127 | 6.417332 | 2.009959 |
| 14737 | LOC119621 | 1.867805 | 4.042509 | 2.146822 | 1.88302  | 0.059698  | 0.107681  | 0        | 0.547412 | 0        | 2.232127 | 6.417332 | 2.009959 |
| 14739 | LOC119621 | 1.867805 | 4.042509 | 2.146822 | 1.88302  | 0.059698  | 0.107681  | 0        | 0.547412 | 0        | 2.232127 | 6.417332 | 2.009    |



|       |           |          |          |          |          |          |          |          |          |          |          |          |          |
|-------|-----------|----------|----------|----------|----------|----------|----------|----------|----------|----------|----------|----------|----------|
| 18465 | TXNDC8    | 0.911539 | 4.042449 | 3.225694 | 1.253203 | 0.210132 | 0.301974 | 0        | 0        | 0        | 4.464254 | 0        | 1.004979 |
| 18466 | SPRR1B    | 0.911539 | 4.042449 | 3.225694 | 1.253203 | 0.210132 | 0.301974 | 0        | 0        | 0        | 4.464254 | 0        | 1.004979 |
| 18469 | PTH       | 0.911539 | 4.042449 | 3.225694 | 1.253203 | 0.210132 | 0.301974 | 0        | 0        | 0        | 4.464254 | 0        | 1.004979 |
| 18470 | LOC103240 | 0.911539 | 4.042449 | 3.225694 | 1.253203 | 0.210132 | 0.301974 | 0        | 0        | 0        | 4.464254 | 0        | 1.004979 |
| 18471 | LOC103240 | 0.911539 | 4.042449 | 3.225694 | 1.253203 | 0.210132 | 0.301974 | 0        | 0        | 0        | 4.464254 | 0        | 1.004979 |
| 18473 | LOC103230 | 0.911539 | 4.042449 | 3.225694 | 1.253203 | 0.210132 | 0.301974 | 0        | 0        | 0        | 4.464254 | 0        | 1.004979 |
| 18475 | LOC119620 | 0.911539 | 4.042449 | 3.225694 | 1.253203 | 0.210132 | 0.301974 | 0        | 0        | 0        | 4.464254 | 0        | 1.004979 |
| 18476 | LOC119620 | 0.911539 | 4.042449 | 3.225694 | 1.253203 | 0.210132 | 0.301974 | 0        | 0        | 0        | 4.464254 | 0        | 1.004979 |
| 18477 | LOC119620 | 0.911539 | 4.042449 | 3.225694 | 1.253203 | 0.210132 | 0.301974 | 0        | 0        | 0        | 4.464254 | 0        | 1.004979 |
| 18478 | LOC119620 | 0.911539 | 4.042449 | 3.225694 | 1.253203 | 0.210132 | 0.301974 | 0        | 0        | 0        | 4.464254 | 0        | 1.004979 |
| 18479 | LOC103220 | 0.911539 | 4.042449 | 3.225694 | 1.253203 | 0.210132 | 0.301974 | 0        | 0        | 0        | 4.464254 | 0        | 1.004979 |
| 18480 | LOC119620 | 0.911539 | 4.042449 | 3.225694 | 1.253203 | 0.210132 | 0.301974 | 0        | 0        | 0        | 4.464254 | 0        | 1.004979 |
| 18481 | TRNAT-AG  | 0.911539 | 4.042449 | 3.225694 | 1.253203 | 0.210132 | 0.301974 | 0        | 0        | 0        | 4.464254 | 0        | 1.004979 |
| 18482 | LOC119620 | 0.911539 | 4.042449 | 3.225694 | 1.253203 | 0.210132 | 0.301974 | 0        | 0        | 0        | 4.464254 | 0        | 1.004979 |
| 18483 | LOC119620 | 0.911539 | 4.042449 | 3.225694 | 1.253203 | 0.210132 | 0.301974 | 0        | 0        | 0        | 4.464254 | 0        | 1.004979 |
| 18484 | LOC103220 | 0.911539 | 4.042449 | 3.225694 | 1.253203 | 0.210132 | 0.301974 | 0        | 0        | 0        | 4.464254 | 0        | 1.004979 |
| 18485 | LOC103220 | 0.911539 | 4.042449 | 3.225694 | 1.253203 | 0.210132 | 0.301974 | 0        | 0        | 0        | 4.464254 | 0        | 1.004979 |
| 18486 | LOC119610 | 0.911539 | 4.042449 | 3.225694 | 1.253203 | 0.210132 | 0.301974 | 0        | 0        | 0        | 4.464254 | 0        | 1.004979 |
| 18487 | PRAP1     | 0.911539 | 4.042449 | 3.225694 | 1.253203 | 0.210132 | 0.301974 | 0        | 0        | 0        | 4.464254 | 0        | 1.004979 |
| 18489 | LOC103210 | 0.911539 | 4.042449 | 3.225694 | 1.253203 | 0.210132 | 0.301974 | 0        | 0        | 0        | 4.464254 | 0        | 1.004979 |
| 18490 | LOC103230 | 0.911539 | 4.042449 | 3.225694 | 1.253203 | 0.210132 | 0.301974 | 0        | 0        | 0        | 4.464254 | 0        | 1.004979 |
| 18491 | LOC119620 | 0.911539 | 4.042449 | 3.225694 | 1.253203 | 0.210132 | 0.301974 | 0        | 0        | 0        | 4.464254 | 0        | 1.004979 |
| 18494 | TNP2      | 0.911539 | 4.042449 | 3.225694 | 1.253203 | 0.210132 | 0.301974 | 0        | 0        | 0        | 4.464254 | 0        | 1.004979 |
| 18496 | IRGC      | 0.911539 | 4.042449 | 3.225694 | 1.253203 | 0.210132 | 0.301974 | 0        | 0        | 0        | 4.464254 | 0        | 1.004979 |
| 18498 | TAS2R9    | 0.911539 | 4.042449 | 3.225694 | 1.253203 | 0.210132 | 0.301974 | 0        | 0        | 0        | 4.464254 | 0        | 1.004979 |
| 14708 | LOC103210 | 1.892525 | 4.042264 | 2.139681 | 1.88919  | 0.058866 | 0.106388 | 0        | 0        | 0.695731 | 2.232127 | 6.417332 | 2.009959 |
| 14709 | LOC103240 | 1.892525 | 4.042264 | 2.139681 | 1.88919  | 0.058866 | 0.106388 | 0        | 0        | 0.695731 | 2.232127 | 6.417332 | 2.009959 |
| 14710 | LOC119610 | 1.892525 | 4.042264 | 2.139681 | 1.88919  | 0.058866 | 0.106388 | 0        | 0        | 0.695731 | 2.232127 | 6.417332 | 2.009959 |
| 10266 | DSG3      | 5.611902 | 4.041466 | 1.445023 | 2.796818 | 0.005161 | 0.013363 | 0        | 0        | 2.087194 | 4.464254 | 17.11289 | 10.04979 |
| 18527 | LOC119620 | 0.874511 | 4.038968 | 3.240356 | 1.246458 | 0.212596 | 0.304922 | 0        | 0        | 0        | 2.232127 | 0        | 3.014938 |
| 18529 | LOC103230 | 0.874511 | 4.038968 | 3.240356 | 1.246458 | 0.212596 | 0.304922 | 0        | 0        | 0        | 2.232127 | 0        | 3.014938 |
| 18530 | FSHB      | 0.874511 | 4.038968 | 3.240356 | 1.246458 | 0.212596 | 0.304922 | 0        | 0        | 0        | 2.232127 | 0        | 3.014938 |
| 18531 | LOC119620 | 0.874511 | 4.038968 | 3.240356 | 1.246458 | 0.212596 | 0.304922 | 0        | 0        | 0        | 2.232127 | 0        | 3.014938 |
| 18533 | LOC119620 | 0.874511 | 4.038968 | 3.240356 | 1.246458 | 0.212596 | 0.304922 | 0        | 0        | 0        | 2.232127 | 0        | 3.014938 |
| 18534 | LOC103220 | 0.874511 | 4.038968 | 3.240356 | 1.246458 | 0.212596 | 0.304922 | 0        | 0        | 0        | 2.232127 | 0        | 3.014938 |
| 18535 | TNMD      | 0.874511 | 4.038968 | 3.240356 | 1.246458 | 0.212596 | 0.304922 | 0        | 0        | 0        | 2.232127 | 0        | 3.014938 |
| 18536 | LOC103240 | 0.874511 | 4.038968 | 3.240356 | 1.246458 | 0.212596 | 0.304922 | 0        | 0        | 0        | 2.232127 | 0        | 3.014938 |
| 16798 | LOC103220 | 1.873828 | 4.038466 | 2.646355 | 1.526049 | 0.126998 | 0.20099  | 0        | 0.547412 | 0        | 0        | 10.69555 | 0        |
| 15843 | LOC103230 | 1.91405  | 4.038252 | 2.386915 | 1.691829 | 0.090679 | 0.152132 | 0        | 0        | 0.695731 | 2.232127 | 8.556443 | 0        |
| 15844 | LOC119620 | 1.91405  | 4.038252 | 2.386915 | 1.691829 | 0.090679 | 0.152132 | 0        | 0        | 0.695731 | 2.232127 | 8.556443 | 0        |
| 15845 | LOC119620 | 1.91405  | 4.038252 | 2.386915 | 1.691829 | 0.090679 | 0.152132 | 0        | 0        | 0.695731 | 2.232127 | 8.556443 | 0        |
| 15846 | LOC103230 | 1.91405  | 4.038252 | 2.386915 | 1.691829 | 0.090679 | 0.152132 | 0        | 0        | 0.695731 | 2.232127 | 8.556443 | 0        |
| 16754 | LOC119620 | 1.898547 | 4.038116 | 2.635922 | 1.531956 | 0.125533 | 0.199147 | 0        | 0        | 0.695731 | 0        | 10.69555 | 0        |
| 16755 | LOC103240 | 1.898547 | 4.038116 | 2.635922 | 1.531956 | 0.125533 | 0.199147 | 0        | 0        | 0.695731 | 0        | 10.69555 | 0        |
| 16756 | LOC103230 | 1.898547 | 4.038116 | 2.635922 | 1.531956 | 0.125533 | 0.199147 | 0        | 0        | 0.695731 | 0        | 10.69555 | 0        |
| 16758 | LOC103220 | 1.898547 | 4.038116 | 2.635922 | 1.531956 | 0.125533 | 0.199147 | 0        | 0        | 0.695731 | 0        | 10.69555 | 0        |
| 10281 | IL24      | 5.677575 | 4.038008 | 1.445819 | 2.792886 | 0.005224 | 0.013508 | 0        | 0        | 2.087194 | 6.696381 | 19.252   | 6.029877 |
| 6529  | LOC103210 | 15.2526  | 4.037934 | 1.028289 | 3.926846 | 8.61E-05 | 0.00035  | 0        | 0        | 5.565851 | 22.32127 | 38.50399 | 25.12449 |
| 15673 | LOC103220 | 1.851415 | 4.037789 | 2.34467  | 1.722158 | 0.085041 | 0.144249 | 0.542086 | 0        | 0        | 0        | 8.556443 | 2.009959 |
| 15603 | LOC103240 | 1.877022 | 4.037701 | 2.335503 | 1.728835 | 0.083839 | 0.142829 | 0        | 0        | 0.695731 | 0        | 8.556443 | 2.009959 |
| 15604 | MHC-DPB1  | 1.877022 | 4.037701 | 2.335503 | 1.728835 | 0.083839 | 0.142829 | 0        | 0        | 0.695731 | 0        | 8.556443 | 2.009959 |
| 15605 | LOC103230 | 1.877022 | 4.037701 | 2.335503 | 1.728835 | 0.083839 | 0.142829 | 0        | 0        | 0.695731 | 0        | 8.556443 | 2.009959 |
| 810   | LOC119620 | 94.92672 | 4.0371   | 0.335703 | 12.0258  | 2.60E-33 | 8.54E-32 | 9.757555 | 8.758589 | 14.61036 | 158.481  | 201.0764 | 176.8764 |
| 8093  | GP2       | 9.328961 | 4.036229 | 1.193147 | 3.382843 | 0.000717 | 0.002357 | 0        | 0.547412 | 2.782925 | 13.39276 | 34.22577 | 5.024897 |
| 5208  | KHDRBS2   | 16.39107 | 4.035204 | 0.882125 | 4.574413 | 4.78E-06 | 2.44E-05 | 0        | 1.642235 | 4.174388 | 37.94616 | 38.50399 | 16.07967 |
| 13497 | LOC103230 | 3.859106 | 4.032767 | 1.913574 | 2.107453 | 0.035078 | 0.069094 | 0        | 0        | 1.391463 | 8.928508 | 12.83466 | 0        |
| 11207 | LOC103230 | 5.417325 | 4.031757 | 1.561848 | 2.581401 | 0.00984  | 0.02334  | 0        | 0.547412 | 1.391463 | 0        | 23.53022 | 7.034856 |
| 9109  | TCEAL5    | 7.5701   | 4.031558 | 1.308678 | 3.080635 | 0.002066 | 0.006029 | 0        | 0        | 2.782925 | 8.928508 | 25.66933 | 8.039836 |
| 8071  | TRIML2    | 7.191431 | 4.029401 | 1.18784  | 3.39221  | 0.000693 | 0.002284 | 0.542086 | 0        | 2.087194 | 15.62489 | 12.83466 | 12.05975 |
| 5871  | LOC119610 | 12.35693 | 4.029258 | 0.952581 | 4.229833 | 2.34E-05 | 0.000106 | 0.542086 | 1.642235 | 2.087194 | 22.32127 | 38.50399 | 9.044815 |
| 6689  | GRIA4     | 17.26825 | 4.027511 | 1.043436 | 3.859852 | 0.000113 | 0.000451 | 0        | 0        | 6.261582 | 26.78552 | 53.47777 | 17.08465 |
| 6580  | ARHGAP20  | 10.69276 | 4.026733 | 1.030182 | 3.908759 | 9.28E-05 | 0.000375 | 1.084173 | 0.547412 | 2.087194 | 22.32127 | 32.08666 | 6.029877 |
| 4958  | LOC119620 | 13.58388 | 4.021715 | 0.853899 | 4.709827 | 2.48E-06 | 1.33E-05 | 0.542086 | 2.737059 | 1.391463 | 26.78552 | 29.94755 | 20.09959 |
| 3830  | LOC119620 | 24.45326 | 4.021554 | 0.729173 | 5.515224 | 3.48E-08 | 2.42E-07 | 3.252518 | 1.094824 | 4.174388 | 37.94616 | 79.14709 | 21.10457 |
| 6454  | AZGP1     | 12.78442 | 4.02127  | 1.015775 | 3.958822 | 7.53E-05 | 0.00031  | 0.542086 | 0.547412 | 3.478657 | 22.32127 | 42.78221 | 7.034856 |
| 18650 | LOC119610 | 0.859008 | 4.018662 | 3.260153 | 1.232661 | 0.217702 | 0.310012 | 0        | 0        | 0        | 0        | 2.139111 | 3.014938 |
| 18651 | LOC103230 | 0.859008 | 4.018662 | 3.260153 | 1.232661 | 0.217702 | 0.310012 | 0        | 0        | 0        | 0        | 2.139111 | 3.014938 |
| 18652 | APCS      | 0.859008 | 4.018662 | 3.260153 | 1.232661 | 0.217702 | 0.310012 | 0        | 0        | 0        | 0        | 2.139111 | 3.014938 |
| 18653 | LOC103220 | 0.859008 | 4.018662 | 3.260153 | 1.232661 | 0.217702 | 0.310012 | 0        | 0        | 0        | 0        | 2.139111 | 3.014938 |
| 18657 | LOC119620 | 0.859008 | 4.018662 | 3.260153 | 1.232661 | 0.217702 | 0.310012 | 0        | 0        | 0        | 0        | 2.139111 | 3.014938 |
| 18660 | LOC119620 | 0.859008 | 4.018662 | 3.260153 | 1.232661 | 0.217702 | 0.310012 | 0        | 0        | 0        | 0        | 2.139111 | 3.014938 |
| 18662 | LOC119610 | 0.859008 | 4.018662 | 3.260153 | 1.232661 | 0.217702 | 0.310012 | 0        | 0        | 0        | 0        | 2.139111 | 3.014938 |
| 18667 | LOC119620 | 0.859008 | 4.018662 | 3.260153 | 1.232661 | 0.217702 | 0.310012 | 0        | 0        | 0        | 0        | 2.139111 | 3.014938 |
| 18668 | LOC119610 | 0.859008 | 4.018662 | 3.260153 | 1.232661 | 0.217702 | 0.310012 | 0        | 0        | 0        | 0        | 2.139111 | 3.014938 |



|       |           |          |          |          |          |          |          |          |          |          |          |          |          |
|-------|-----------|----------|----------|----------|----------|----------|----------|----------|----------|----------|----------|----------|----------|
| 10001 | LOC119621 | 5.179858 | 4.017231 | 1.404029 | 2.861215 | 0.00422  | 0.011218 | 1.084173 | 0        | 0.695731 | 17.85702 | 6.417332 | 5.024897 |
| 17747 | LOC103218 | 0.896036 | 4.016615 | 2.921116 | 1.375028 | 0.169123 | 0.252436 | 0        | 0        | 0        | 2.232127 | 2.139111 | 1.004979 |
| 17748 | LOC103235 | 0.896036 | 4.016615 | 2.921116 | 1.375028 | 0.169123 | 0.252436 | 0        | 0        | 0        | 2.232127 | 2.139111 | 1.004979 |
| 17749 | LOC119621 | 0.896036 | 4.016615 | 2.921116 | 1.375028 | 0.169123 | 0.252436 | 0        | 0        | 0        | 2.232127 | 2.139111 | 1.004979 |
| 17750 | LOC119624 | 0.896036 | 4.016615 | 2.921116 | 1.375028 | 0.169123 | 0.252436 | 0        | 0        | 0        | 2.232127 | 2.139111 | 1.004979 |
| 17751 | KERA      | 0.896036 | 4.016615 | 2.921116 | 1.375028 | 0.169123 | 0.252436 | 0        | 0        | 0        | 2.232127 | 2.139111 | 1.004979 |
| 17753 | CCIN      | 0.896036 | 4.016615 | 2.921116 | 1.375028 | 0.169123 | 0.252436 | 0        | 0        | 0        | 2.232127 | 2.139111 | 1.004979 |
| 17754 | LOC103246 | 0.896036 | 4.016615 | 2.921116 | 1.375028 | 0.169123 | 0.252436 | 0        | 0        | 0        | 2.232127 | 2.139111 | 1.004979 |
| 17755 | LOC119624 | 0.896036 | 4.016615 | 2.921116 | 1.375028 | 0.169123 | 0.252436 | 0        | 0        | 0        | 2.232127 | 2.139111 | 1.004979 |
| 17757 | LOC119624 | 0.896036 | 4.016615 | 2.921116 | 1.375028 | 0.169123 | 0.252436 | 0        | 0        | 0        | 2.232127 | 2.139111 | 1.004979 |
| 17759 | LOC119625 | 0.896036 | 4.016615 | 2.921116 | 1.375028 | 0.169123 | 0.252436 | 0        | 0        | 0        | 2.232127 | 2.139111 | 1.004979 |
| 17761 | LOC103241 | 0.896036 | 4.016615 | 2.921116 | 1.375028 | 0.169123 | 0.252436 | 0        | 0        | 0        | 2.232127 | 2.139111 | 1.004979 |
| 17762 | LOC119625 | 0.896036 | 4.016615 | 2.921116 | 1.375028 | 0.169123 | 0.252436 | 0        | 0        | 0        | 2.232127 | 2.139111 | 1.004979 |
| 17763 | LOC119625 | 0.896036 | 4.016615 | 2.921116 | 1.375028 | 0.169123 | 0.252436 | 0        | 0        | 0        | 2.232127 | 2.139111 | 1.004979 |
| 17765 | SLC5A7    | 0.896036 | 4.016615 | 2.921116 | 1.375028 | 0.169123 | 0.252436 | 0        | 0        | 0        | 2.232127 | 2.139111 | 1.004979 |
| 17767 | LOC103248 | 0.896036 | 4.016615 | 2.921116 | 1.375028 | 0.169123 | 0.252436 | 0        | 0        | 0        | 2.232127 | 2.139111 | 1.004979 |
| 17768 | LOC119626 | 0.896036 | 4.016615 | 2.921116 | 1.375028 | 0.169123 | 0.252436 | 0        | 0        | 0        | 2.232127 | 2.139111 | 1.004979 |
| 17770 | LOC103220 | 0.896036 | 4.016615 | 2.921116 | 1.375028 | 0.169123 | 0.252436 | 0        | 0        | 0        | 2.232127 | 2.139111 | 1.004979 |
| 17771 | LOC119627 | 0.896036 | 4.016615 | 2.921116 | 1.375028 | 0.169123 | 0.252436 | 0        | 0        | 0        | 2.232127 | 2.139111 | 1.004979 |
| 17772 | LOC103214 | 0.896036 | 4.016615 | 2.921116 | 1.375028 | 0.169123 | 0.252436 | 0        | 0        | 0        | 2.232127 | 2.139111 | 1.004979 |
| 17773 | CCL22     | 0.896036 | 4.016615 | 2.921116 | 1.375028 | 0.169123 | 0.252436 | 0        | 0        | 0        | 2.232127 | 2.139111 | 1.004979 |
| 17774 | LOC119628 | 0.896036 | 4.016615 | 2.921116 | 1.375028 | 0.169123 | 0.252436 | 0        | 0        | 0        | 2.232127 | 2.139111 | 1.004979 |
| 17775 | PNLIPRP3  | 0.896036 | 4.016615 | 2.921116 | 1.375028 | 0.169123 | 0.252436 | 0        | 0        | 0        | 2.232127 | 2.139111 | 1.004979 |
| 17778 | LOC119628 | 0.896036 | 4.016615 | 2.921116 | 1.375028 | 0.169123 | 0.252436 | 0        | 0        | 0        | 2.232127 | 2.139111 | 1.004979 |
| 17779 | LOC119618 | 0.896036 | 4.016615 | 2.921116 | 1.375028 | 0.169123 | 0.252436 | 0        | 0        | 0        | 2.232127 | 2.139111 | 1.004979 |
| 17780 | GTSF1L    | 0.896036 | 4.016615 | 2.921116 | 1.375028 | 0.169123 | 0.252436 | 0        | 0        | 0        | 2.232127 | 2.139111 | 1.004979 |
| 17781 | DEFB115   | 0.896036 | 4.016615 | 2.921116 | 1.375028 | 0.169123 | 0.252436 | 0        | 0        | 0        | 2.232127 | 2.139111 | 1.004979 |
| 17782 | SMIM18    | 0.896036 | 4.016615 | 2.921116 | 1.375028 | 0.169123 | 0.252436 | 0        | 0        | 0        | 2.232127 | 2.139111 | 1.004979 |
| 17783 | LOC119618 | 0.896036 | 4.016615 | 2.921116 | 1.375028 | 0.169123 | 0.252436 | 0        | 0        | 0        | 2.232127 | 2.139111 | 1.004979 |
| 17784 | LOC119619 | 0.896036 | 4.016615 | 2.921116 | 1.375028 | 0.169123 | 0.252436 | 0        | 0        | 0        | 2.232127 | 2.139111 | 1.004979 |
| 17786 | LOC103246 | 0.896036 | 4.016615 | 2.921116 | 1.375028 | 0.169123 | 0.252436 | 0        | 0        | 0        | 2.232127 | 2.139111 | 1.004979 |
| 17787 | LOC119619 | 0.896036 | 4.016615 | 2.921116 | 1.375028 | 0.169123 | 0.252436 | 0        | 0        | 0        | 2.232127 | 2.139111 | 1.004979 |
| 17788 | LOC119619 | 0.896036 | 4.016615 | 2.921116 | 1.375028 | 0.169123 | 0.252436 | 0        | 0        | 0        | 2.232127 | 2.139111 | 1.004979 |
| 17789 | LOC103230 | 0.896036 | 4.016615 | 2.921116 | 1.375028 | 0.169123 | 0.252436 | 0        | 0        | 0        | 2.232127 | 2.139111 | 1.004979 |
| 17790 | LOC103230 | 0.896036 | 4.016615 | 2.921116 | 1.375028 | 0.169123 | 0.252436 | 0        | 0        | 0        | 2.232127 | 2.139111 | 1.004979 |
| 17791 | LOC103247 | 0.896036 | 4.016615 | 2.921116 | 1.375028 | 0.169123 | 0.252436 | 0        | 0        | 0        | 2.232127 | 2.139111 | 1.004979 |
| 17792 | LOC119620 | 0.896036 | 4.016615 | 2.921116 | 1.375028 | 0.169123 | 0.252436 | 0        | 0        | 0        | 2.232127 | 2.139111 | 1.004979 |
| 17793 | LOC119620 | 0.896036 | 4.016615 | 2.921116 | 1.375028 | 0.169123 | 0.252436 | 0        | 0        | 0        | 2.232127 | 2.139111 | 1.004979 |
| 17794 | LOC103247 | 0.896036 | 4.016615 | 2.921116 | 1.375028 | 0.169123 | 0.252436 | 0        | 0        | 0        | 2.232127 | 2.139111 | 1.004979 |
| 17795 | LOC103233 | 0.896036 | 4.016615 | 2.921116 | 1.375028 | 0.169123 | 0.252436 | 0        | 0        | 0        | 2.232127 | 2.139111 | 1.004979 |
| 17796 | LOC119620 | 0.896036 | 4.016615 | 2.921116 | 1.375028 | 0.169123 | 0.252436 | 0        | 0        | 0        | 2.232127 | 2.139111 | 1.004979 |
| 17797 | LOC119620 | 0.896036 | 4.016615 | 2.921116 | 1.375028 | 0.169123 | 0.252436 | 0        | 0        | 0        | 2.232127 | 2.139111 | 1.004979 |
| 17799 | CAPZA3    | 0.896036 | 4.016615 | 2.921116 | 1.375028 | 0.169123 | 0.252436 | 0        | 0        | 0        | 2.232127 | 2.139111 | 1.004979 |
| 17800 | LOC119621 | 0.896036 | 4.016615 | 2.921116 | 1.375028 | 0.169123 | 0.252436 | 0        | 0        | 0        | 2.232127 | 2.139111 | 1.004979 |
| 17804 | KRTAP29-1 | 0.896036 | 4.016615 | 2.921116 | 1.375028 | 0.169123 | 0.252436 | 0        | 0        | 0        | 2.232127 | 2.139111 | 1.004979 |
| 17805 | LOC103214 | 0.896036 | 4.016615 | 2.921116 | 1.375028 | 0.169123 | 0.252436 | 0        | 0        | 0        | 2.232127 | 2.139111 | 1.004979 |
| 17806 | LOC119627 | 0.896036 | 4.016615 | 2.921116 | 1.375028 | 0.169123 | 0.252436 | 0        | 0        | 0        | 2.232127 | 2.139111 | 1.004979 |
| 17807 | LOC103247 | 0.896036 | 4.016615 | 2.921116 | 1.375028 | 0.169123 | 0.252436 | 0        | 0        | 0        | 2.232127 | 2.139111 | 1.004979 |
| 17808 | LOC103247 | 0.896036 | 4.016615 | 2.921116 | 1.375028 | 0.169123 | 0.252436 | 0        | 0        | 0        | 2.232127 | 2.139111 | 1.004979 |
| 17811 | LOC119623 | 0.896036 | 4.016615 | 2.921116 | 1.375028 | 0.169123 | 0.252436 | 0        | 0        | 0        | 2.232127 | 2.139111 | 1.004979 |
| 11144 | MAGEA8    | 4.995439 | 4.016173 | 1.548798 | 2.59309  | 0.009512 | 0.022691 | 0        | 1.642235 | 0        | 15.62489 | 10.69555 | 2.009959 |
| 5066  | CNTNAP5   | 24.14391 | 4.014179 | 0.86296  | 4.651642 | 3.29E-06 | 1.73E-05 | 0        | 1.094824 | 7.653045 | 42.41041 | 70.59065 | 23.11453 |
| 19681 | LOC119623 | 0.837483 | 4.012891 | 3.739449 | 1.073124 | 0.283216 | 0.382566 | 0        | 0        | 0        | 0        | 0        | 5.024897 |
| 14060 | LOC119623 | 3.812598 | 4.012671 | 2.004486 | 2.001845 | 0.045301 | 0.085657 | 0        | 0        | 1.391463 | 2.232127 | 19.252   | 0        |
| 3707  | LOC119626 | 36.81868 | 4.012263 | 0.712117 | 5.634278 | 1.76E-08 | 1.26E-07 | 1.084173 | 1.094824 | 11.1317  | 91.51721 | 74.86887 | 41.20416 |
| 8186  | FAM163B   | 9.388144 | 4.011612 | 1.19709  | 3.351135 | 0.000805 | 0.002614 | 0        | 0        | 3.478657 | 24.5534  | 19.252   | 9.044815 |
| 5151  | CDC20B    | 16.01859 | 4.011473 | 0.871656 | 4.60213  | 4.18E-06 | 2.16E-05 | 0.542086 | 1.094824 | 4.174388 | 17.85702 | 51.33866 | 21.10457 |
| 8961  | LOC119620 | 7.070701 | 4.008615 | 1.281329 | 3.128483 | 0.001757 | 0.005213 | 0        | 1.094824 | 1.391463 | 13.39276 | 23.53022 | 3.014938 |
| 11606 | LOC103234 | 5.437538 | 4.005964 | 1.607385 | 2.492225 | 0.012695 | 0.029078 | 0.542086 | 0        | 1.391463 | 17.85702 | 12.83466 | 0        |
| 9815  | RXRG      | 5.150628 | 4.004515 | 1.38019  | 2.901422 | 0.003715 | 0.010062 | 0        | 1.094824 | 0.695731 | 13.39276 | 10.69555 | 5.024897 |
| 5105  | VIL1      | 24.03408 | 4.004408 | 0.865685 | 4.62571  | 3.73E-06 | 1.94E-05 | 0.542086 | 0.547412 | 7.653045 | 44.64254 | 72.72976 | 18.08963 |
| 10322 | LOC119627 | 5.572089 | 4.002138 | 1.438019 | 2.78309  | 0.005384 | 0.013866 | 0        | 0        | 2.087194 | 15.62489 | 10.69555 | 5.024897 |
| 3618  | RGS8      | 24.751   | 4.001972 | 0.699602 | 5.720355 | 1.06E-08 | 7.81E-08 | 1.626259 | 1.094824 | 6.261582 | 58.0353  | 51.33866 | 30.14938 |
| 18703 | C1QA      | 0.880533 | 4.001685 | 3.262894 | 1.226422 | 0.22004  | 0.312237 | 0        | 0        | 0        | 0        | 4.278221 | 1.004979 |
| 18704 | LOC119623 | 0.880533 | 4.001685 | 3.262894 | 1.226422 | 0.22004  | 0.312237 | 0        | 0        | 0        | 0        | 4.278221 | 1.004979 |
| 18705 | LOC119624 | 0.880533 | 4.001685 | 3.262894 | 1.226422 | 0.22004  | 0.312237 | 0        | 0        | 0        | 0        | 4.278221 | 1.004979 |
| 18706 | LOC119624 | 0.880533 | 4.001685 | 3.262894 | 1.226422 | 0.22004  | 0.312237 | 0        | 0        | 0        | 0        | 4.278221 | 1.004979 |
| 18707 | LOC119624 | 0.880533 | 4.001685 | 3.262894 | 1.226422 | 0.22004  | 0.312237 | 0        | 0        | 0        | 0        | 4.278221 | 1.004979 |
| 18708 | GJE1      | 0.880533 | 4.001685 | 3.262894 | 1.226422 | 0.22004  | 0.312237 | 0        | 0        | 0        | 0        | 4.278221 | 1.004979 |
| 18709 | LOC103240 | 0.880533 | 4.001685 | 3.262894 | 1.226422 | 0.22004  | 0.312237 | 0        | 0        | 0        | 0        | 4.278221 | 1.004979 |
| 18710 | LOC119626 | 0.880533 | 4.001685 | 3.262894 | 1.226422 | 0.22004  | 0.312237 | 0        | 0        | 0        | 0        | 4.278221 | 1.004979 |
| 18711 | CKK       | 0.880533 | 4.001685 | 3.262894 | 1.226422 | 0.22004  | 0.312237 | 0        | 0        | 0        | 0        | 4.278221 | 1.004979 |
| 18713 | LOC119626 | 0.880533 | 4.001685 | 3.262894 | 1.226422 | 0.22004  | 0.312237 | 0        | 0        | 0        | 0        | 4.278221 | 1.004979 |
| 18714 | LOC103215 | 0.880533 | 4.001685 | 3.262894 | 1.226422 | 0.22004  | 0.312237 | 0        | 0        | 0        | 0        | 4.278221 | 1.004979 |



|       |           |          |          |          |          |           |           |          |          |          |          |          |          |
|-------|-----------|----------|----------|----------|----------|-----------|-----------|----------|----------|----------|----------|----------|----------|
| 18715 | LOC119621 | 0.880533 | 4.001685 | 3.262894 | 1.226422 | 0.22004   | 0.312237  | 0        | 0        | 0        | 0        | 4.278221 | 1.004979 |
| 18716 | LOC103241 | 0.880533 | 4.001685 | 3.262894 | 1.226422 | 0.22004   | 0.312237  | 0        | 0        | 0        | 0        | 4.278221 | 1.004979 |
| 18717 | LOC119621 | 0.880533 | 4.001685 | 3.262894 | 1.226422 | 0.22004   | 0.312237  | 0        | 0        | 0        | 0        | 4.278221 | 1.004979 |
| 18718 | LOC119611 | 0.880533 | 4.001685 | 3.262894 | 1.226422 | 0.22004   | 0.312237  | 0        | 0        | 0        | 0        | 4.278221 | 1.004979 |
| 18719 | CUNH1orf  | 0.880533 | 4.001685 | 3.262894 | 1.226422 | 0.22004   | 0.312237  | 0        | 0        | 0        | 0        | 4.278221 | 1.004979 |
| 18720 | LOC103231 | 0.880533 | 4.001685 | 3.262894 | 1.226422 | 0.22004   | 0.312237  | 0        | 0        | 0        | 0        | 4.278221 | 1.004979 |
| 18721 | LOC103231 | 0.880533 | 4.001685 | 3.262894 | 1.226422 | 0.22004   | 0.312237  | 0        | 0        | 0        | 0        | 4.278221 | 1.004979 |
| 18722 | LOC119621 | 0.880533 | 4.001685 | 3.262894 | 1.226422 | 0.22004   | 0.312237  | 0        | 0        | 0        | 0        | 4.278221 | 1.004979 |
| 18723 | LOC103241 | 0.880533 | 4.001685 | 3.262894 | 1.226422 | 0.22004   | 0.312237  | 0        | 0        | 0        | 0        | 4.278221 | 1.004979 |
| 18724 | LOC103231 | 0.880533 | 4.001685 | 3.262894 | 1.226422 | 0.22004   | 0.312237  | 0        | 0        | 0        | 0        | 4.278221 | 1.004979 |
| 18725 | LOC119621 | 0.880533 | 4.001685 | 3.262894 | 1.226422 | 0.22004   | 0.312237  | 0        | 0        | 0        | 0        | 4.278221 | 1.004979 |
| 18728 | LOC119621 | 0.880533 | 4.001685 | 3.262894 | 1.226422 | 0.22004   | 0.312237  | 0        | 0        | 0        | 0        | 4.278221 | 1.004979 |
| 18729 | LOC103211 | 0.880533 | 4.001685 | 3.262894 | 1.226422 | 0.22004   | 0.312237  | 0        | 0        | 0        | 0        | 4.278221 | 1.004979 |
| 18730 | LOC119621 | 0.880533 | 4.001685 | 3.262894 | 1.226422 | 0.22004   | 0.312237  | 0        | 0        | 0        | 0        | 4.278221 | 1.004979 |
| 18731 | LOC103231 | 0.880533 | 4.001685 | 3.262894 | 1.226422 | 0.22004   | 0.312237  | 0        | 0        | 0        | 0        | 4.278221 | 1.004979 |
| 18732 | LOC103211 | 0.880533 | 4.001685 | 3.262894 | 1.226422 | 0.22004   | 0.312237  | 0        | 0        | 0        | 0        | 4.278221 | 1.004979 |
| 18733 | LOC119621 | 0.880533 | 4.001685 | 3.262894 | 1.226422 | 0.22004   | 0.312237  | 0        | 0        | 0        | 0        | 4.278221 | 1.004979 |
| 18734 | LOC119621 | 0.880533 | 4.001685 | 3.262894 | 1.226422 | 0.22004   | 0.312237  | 0        | 0        | 0        | 0        | 4.278221 | 1.004979 |
| 18735 | LOC119621 | 0.880533 | 4.001685 | 3.262894 | 1.226422 | 0.22004   | 0.312237  | 0        | 0        | 0        | 0        | 4.278221 | 1.004979 |
| 6858  | LOC103231 | 10.89943 | 3.999777 | 1.054518 | 3.792989 | 0.000149  | 0.000577  | 0        | 0.547412 | 3.478657 | 26.78552 | 23.53022 | 11.05477 |
| 6839  | LOC103221 | 10.71324 | 3.999712 | 1.052015 | 3.801953 | 0.000144  | 0.000558  | 0        | 1.094824 | 2.782925 | 24.5534  | 27.80844 | 8.039836 |
| 9889  | LOC103231 | 5.348867 | 3.999325 | 1.385612 | 2.886324 | 0.003898  | 0.010477  | 0        | 0.547412 | 1.391463 | 11.16063 | 14.97377 | 4.019918 |
| 4261  | GA57      | 24.81866 | 3.999111 | 0.771738 | 5.181957 | 2.20E-07  | 1.37E-06  | 0        | 2.737059 | 6.261582 | 40.17829 | 70.59065 | 29.1444  |
| 6750  | CYP2G2    | 10.8469  | 3.99904  | 1.042297 | 3.836758 | 0.000125  | 0.000491  | 0        | 0.547412 | 3.478657 | 22.32127 | 25.66933 | 13.06473 |
| 7022  | LOC119621 | 10.93646 | 3.998603 | 1.073151 | 3.726041 | 0.000195  | 0.000736  | 0        | 0.547412 | 3.478657 | 29.01765 | 23.53022 | 9.044815 |
| 3512  | AGMO      | 21.45422 | 3.997919 | 0.683895 | 5.845805 | 5.04E-09  | 3.82E-08  | 4.336691 | 1.094824 | 2.087194 | 44.64254 | 36.36488 | 40.19918 |
| 10108 | GDF2      | 5.067092 | 3.997861 | 1.409222 | 2.836928 | 0.004555  | 0.011979  | 0        | 1.094824 | 0.695731 | 4.464254 | 17.11289 | 7.034856 |
| 12793 | IDO1      | 3.19955  | 3.997408 | 1.783739 | 2.241027 | 0.025024  | 0.052003  | 0        | 1.094824 | 0        | 8.928508 | 2.139111 | 7.034856 |
| 6457  | LOC119621 | 12.70842 | 3.996172 | 1.009815 | 3.957332 | 7.58E-05  | 0.000312  | 0        | 0.547412 | 4.174388 | 20.08914 | 36.36488 | 15.07469 |
| 6211  | TMEM45B   | 10.02525 | 3.994919 | 0.981882 | 4.068636 | 4.73E-05  | 0.000202  | 0.542086 | 1.642235 | 1.391463 | 26.78552 | 10.69555 | 19.09461 |
| 6044  | CALN1     | 22.40783 | 3.994603 | 0.963409 | 4.146322 | 3.38E-05  | 0.000149  | 0.542086 | 0        | 7.653045 | 46.87467 | 66.31243 | 13.06473 |
| 7212  | IGSF22    | 8.694125 | 3.993107 | 1.090054 | 3.663221 | 0.000249  | 0.000918  | 0        | 1.094824 | 2.087194 | 13.39276 | 23.53022 | 12.05975 |
| 6987  | LOC103241 | 10.83653 | 3.992595 | 1.067748 | 3.739267 | 0.000185  | 0.000702  | 0.542086 | 0        | 3.478657 | 17.85702 | 32.08666 | 11.05477 |
| 10156 | TACR2     | 5.317862 | 3.991926 | 1.413396 | 2.824352 | 0.004738  | 0.012402  | 0        | 0.547412 | 1.391463 | 6.696381 | 19.252   | 4.019918 |
| 12094 | PLA2G2E   | 3.590005 | 3.991369 | 1.671116 | 2.388382 | 0.016923  | 0.0372    | 0        | 0        | 1.391463 | 6.696381 | 6.417332 | 7.034856 |
| 2673  | CCN5      | 31.94785 | 3.990082 | 0.580533 | 6.873134 | 6.28E-12  | 6.25E-11  | 3.252518 | 2.189647 | 6.261582 | 40.17829 | 68.45154 | 71.35354 |
| 50    | CLDN10    | 927.7291 | 3.98984  | 0.133369 | 29.91569 | 1.23E-196 | 6.54E-194 | 124.1378 | 101.2712 | 103.664  | 1763.38  | 1726.262 | 1747.659 |
| 7610  | PLEKHB1   | 8.805209 | 3.989541 | 1.132528 | 3.522687 | 0.000427  | 0.001492  | 0        | 1.094824 | 2.087194 | 20.08914 | 23.53022 | 6.029877 |
| 9322  | VWA2      | 6.766976 | 3.988255 | 1.318252 | 3.025412 | 0.002483  | 0.007081  | 0        | 1.642235 | 0.695731 | 24.5534  | 10.69555 | 3.014938 |
| 7464  | SIDT1     | 8.752678 | 3.988082 | 1.115285 | 3.57584  | 0.000349  | 0.001243  | 0        | 1.094824 | 2.087194 | 15.62489 | 25.66933 | 8.039836 |
| 5488  | LOC119621 | 13.45723 | 3.987786 | 0.903335 | 4.414516 | 1.01E-05  | 4.90E-05  | 1.626259 | 1.642235 | 1.391463 | 44.64254 | 21.39111 | 10.04979 |
| 17    | IGFBP7    | 5153.577 | 3.987536 | 0.089754 | 44.42726 | 0         | 0         | 627.736  | 623.5021 | 581.6314 | 9841.448 | 9384.278 | 9862.869 |
| 12072 | LOC103231 | 57.4747  | 3.987086 | 1.665825 | 2.393461 | 0.01669   | 0.036755  | 0        | 1.094824 | 19.48048 | 93.74933 | 156.1551 | 74.36848 |
| 8059  | SIGLEC14  | 9.034454 | 3.98558  | 1.173419 | 3.396554 | 0.000682  | 0.002251  | 0        | 0.547412 | 2.782925 | 22.32127 | 23.53022 | 5.024897 |
| 25    | SMIM10L2  | 2251.156 | 3.984997 | 0.112429 | 35.44466 | 3.51E-275 | 3.73E-272 | 279.7166 | 272.0637 | 250.4633 | 4066.935 | 4010.833 | 4626.925 |
| 11865 | LOC103241 | 3.382286 | 3.984535 | 1.637284 | 2.433625 | 0.014948  | 0.033494  | 0        | 0.547412 | 0.695731 | 4.464254 | 8.556443 | 6.029877 |
| 3422  | EPHB1     | 38.49717 | 3.982482 | 0.672419 | 5.922623 | 3.17E-09  | 2.46E-08  | 0.542086 | 4.379295 | 9.044508 | 75.89232 | 106.9555 | 34.1693  |
| 6157  | ELAVL4    | 12.32718 | 3.982475 | 0.97282  | 4.093743 | 4.24E-05  | 0.000183  | 0        | 1.094824 | 3.478657 | 20.08914 | 34.22577 | 15.07469 |
| 12142 | CLUU1-AS1 | 3.611531 | 3.982356 | 1.674527 | 2.378197 | 0.017398  | 0.038089  | 0        | 0        | 1.391463 | 6.696381 | 8.556443 | 5.024897 |
| 12143 | LOC119621 | 3.611531 | 3.982356 | 1.674527 | 2.378197 | 0.017398  | 0.038089  | 0        | 0        | 1.391463 | 6.696381 | 8.556443 | 5.024897 |
| 3549  | PIGR      | 20.02719 | 3.982092 | 0.686038 | 5.804475 | 6.46E-09  | 4.84E-08  | 1.626259 | 2.737059 | 2.782925 | 37.94616 | 44.92132 | 30.14938 |
| 5462  | LRRC74A   | 15.81789 | 3.981787 | 0.89798  | 4.434158 | 9.24E-06  | 4.50E-05  | 1.626259 | 0        | 4.174388 | 31.24978 | 42.78221 | 15.07469 |
| 5519  | DRAXIN    | 19.67018 | 3.981543 | 0.904031 | 4.404209 | 1.06E-05  | 5.11E-05  | 0        | 1.642235 | 5.565851 | 35.71403 | 62.03421 | 13.06473 |
| 4144  | PREX2     | 16.89567 | 3.980779 | 0.756591 | 5.261465 | 1.43E-07  | 9.17E-07  | 1.626259 | 1.642235 | 2.782925 | 35.71403 | 38.50399 | 21.10457 |
| 12170 | MEP1A     | 3.470957 | 3.980344 | 1.67816  | 2.37185  | 0.017699  | 0.038664  | 0.542086 | 0        | 0.695731 | 11.16063 | 6.417332 | 2.009959 |
| 8029  | LOC119621 | 8.763836 | 3.97979  | 1.169193 | 3.403877 | 0.000664  | 0.0022    | 0.542086 | 0.547412 | 2.087194 | 11.16063 | 34.22577 | 4.019918 |
| 8351  | ZSWIM2    | 7.030845 | 3.979405 | 1.207126 | 3.296596 | 0.000979  | 0.003115  | 0        | 0.547412 | 2.087194 | 13.39276 | 17.11289 | 9.044815 |
| 13765 | LOC119611 | 165.3533 | 3.979188 | 1.937393 | 2.053888 | 0.039987  | 0.077228  | 0        | 2.189647 | 57.04997 | 357.1403 | 464.187  | 111.5527 |
| 913   | TMEM1511  | 81.99758 | 3.978788 | 0.348596 | 11.41376 | 3.57E-30  | 1.04E-28  | 8.673382 | 9.853413 | 11.1317  | 149.5525 | 136.9031 | 175.8714 |
| 6910  | SIGLEC16  | 9.946678 | 3.978321 | 1.054256 | 3.773582 | 0.000161  | 0.000619  | 0.542086 | 2.189647 | 0.695731 | 24.5534  | 25.66933 | 6.029877 |
| 6571  | LOC119621 | 10.13712 | 3.977701 | 1.016905 | 3.911576 | 9.17E-05  | 0.000371  | 1.626259 | 0.547412 | 1.391463 | 24.5534  | 25.66933 | 7.034856 |
| 10280 | FAT3      | 38.80927 | 3.977406 | 1.423782 | 2.79355  | 0.005213  | 0.013482  | 0        | 2.189647 | 11.82743 | 89.28508 | 98.39909 | 31.15436 |
| 12296 | P2RX2     | 3.648559 | 3.977194 | 1.696013 | 2.345026 | 0.019026  | 0.041134  | 0        | 0        | 1.391463 | 8.928508 | 8.556443 | 3.014938 |
| 13198 | FFAR1     | 3.264126 | 3.975752 | 1.832662 | 2.169386 | 0.030053  | 0.060537  | 0        | 1.094824 | 0        | 8.928508 | 8.556443 | 1.004979 |
| 12289 | RNASE2    | 3.596028 | 3.975231 | 1.694037 | 2.346602 | 0.018945  | 0.040985  | 0        | 0        | 1.391463 | 4.464254 | 10.69555 | 5.024897 |
| 11119 | EN1       | 5.457547 | 3.975047 | 1.529799 | 2.598411 | 0.009366  | 0.022393  | 0        | 0        | 2.087194 | 2.232127 | 21.39111 | 7.034856 |
| 7872  | LOC119621 | 13.00224 | 3.974403 | 1.152658 | 3.448032 | 0.000565  | 0.001907  | 0        | 0        | 4.87012  | 22.32127 | 42.78221 | 8.039836 |
| 2732  | LOC119611 | 35.87802 | 3.974305 | 0.584175 | 6.803273 | 1.02E-11  | 9.95E-11  | 1.626259 | 2.737059 | 9.044508 | 58.0353  | 68.45154 | 75.37346 |
| 8448  | LOC103241 | 6.896294 | 3.972314 | 1.214937 | 3.269563 | 0.001077  | 0.00339   | 0.542086 | 0.547412 | 1.391463 | 15.62489 | 19.252   | 4.019918 |
| 2707  | GSDMC     | 49.22808 | 3.971709 | 0.581787 | 6.826742 | 8.69E-12  | 8.53E-11  | 2.168345 | 6.568942 | 9.044508 | 80.35657 | 154.016  | 43.21412 |
| 12156 | LOC119621 | 3.456342 | 3.971654 | 1.672532 | 2.374636 | 0.017566  | 0.038414  | 0        | 0.547412 | 0.695731 | 8.928508 | 8.556443 | 2.009959 |
| 12157 | DKK4      | 3.456342 | 3.971654 | 1.672532 | 2.374636 | 0.017566  | 0.038414  | 0        | 0.547412 | 0.695731 | 8.928508 | 8.556443 | 2.009959 |
| 13775 | ZNF677    | 19.10782 | 3.971524 | 1.935339 | 2.052107 | 0.040159  | 0.077507  | 0        | 0        | 6.957314 | 42.41041 | 49.19955 | 16.07967 |
| 7301  | CADPS     | 8.586864 | 3.97126  | 1.092436 | 3.635233 | 0.000278  | 0.001011  | 1.084173 | 0        | 2.087194 | 22.32127 | 14.97377 | 11.05477 |



|       |           |          |          |          |          |           |           |          |          |          |          |          |          |
|-------|-----------|----------|----------|----------|----------|-----------|-----------|----------|----------|----------|----------|----------|----------|
| 12806 | DBX2      | 3.685587 | 3.971174 | 1.774733 | 2.237617 | 0.025246  | 0.052408  | 0        | 0        | 1.391463 | 11.16063 | 8.556443 | 1.004979 |
| 12215 | CD36      | 3.241713 | 3.971009 | 1.679385 | 2.364562 | 0.018051  | 0.039288  | 0.542086 | 0.547412 | 0        | 8.928508 | 6.417332 | 3.014938 |
| 7262  | SMIM22    | 10.73796 | 3.967798 | 1.087284 | 3.649276 | 0.000263  | 0.000963  | 0        | 0.547412 | 3.478657 | 24.5534  | 27.80844 | 8.039836 |
| 12333 | CEACAM5   | 3.388309 | 3.966815 | 1.696869 | 2.337726 | 0.019401  | 0.041822  | 0        | 0.547412 | 0.695731 | 2.232127 | 12.83466 | 4.019918 |
| 12223 | GPR143    | 3.440839 | 3.966568 | 1.679278 | 2.362067 | 0.018173  | 0.039527  | 0        | 0.547412 | 0.695731 | 6.696381 | 10.69555 | 2.009959 |
| 5793  | LOC103238 | 11.9812  | 3.965794 | 0.927106 | 4.277605 | 1.89E-05  | 8.67E-05  | 1.084173 | 0.547412 | 2.782925 | 22.32127 | 32.08666 | 13.06473 |
| 7281  | LOC119624 | 8.328389 | 3.964001 | 1.089285 | 3.639085 | 0.000274  | 0.000999  | 0        | 1.642235 | 1.391463 | 15.62489 | 19.252   | 12.05975 |
| 8108  | LOC103231 | 8.89194  | 3.962243 | 1.173286 | 3.377049 | 0.000733  | 0.002402  | 0        | 0.547412 | 2.782925 | 29.01765 | 14.97377 | 6.029877 |
| 6768  | LOC119624 | 16.49666 | 3.962198 | 1.034865 | 3.828709 | 0.000129  | 0.000506  | 0        | 0        | 6.261582 | 24.5534  | 47.06043 | 21.10457 |
| 7752  | LOC119621 | 8.839409 | 3.961813 | 1.139252 | 3.477557 | 0.000506  | 0.001735  | 0        | 0.547412 | 2.782925 | 24.5534  | 17.11289 | 8.039836 |
| 7338  | SLC15A1   | 9.595557 | 3.961688 | 1.094559 | 3.619439 | 0.000295  | 0.00107   | 1.084173 | 2.189647 | 0        | 29.01765 | 19.252   | 6.029877 |
| 5061  | LOC119621 | 16.72135 | 3.960606 | 0.850886 | 4.654687 | 3.24E-06  | 1.70E-05  | 0        | 3.284471 | 2.782925 | 31.24978 | 44.92132 | 18.08963 |
| 9773  | LOC103227 | 5.137432 | 3.960068 | 1.360731 | 2.910251 | 0.003611  | 0.009824  | 0.542086 | 0        | 1.391463 | 11.16063 | 10.69555 | 7.034856 |
| 12929 | LOC103241 | 3.654581 | 3.959814 | 1.786789 | 2.216162 | 0.02668   | 0.054857  | 0        | 0        | 1.391463 | 6.696381 | 12.83466 | 1.004979 |
| 10445 | LOC103248 | 5.324514 | 3.959467 | 1.436522 | 2.756287 | 0.005846  | 0.01488   | 0        | 0        | 2.087194 | 13.39276 | 6.417332 | 10.04979 |
| 9677  | ABCG8     | 7.30314  | 3.958748 | 1.34782  | 2.937149 | 0.003312  | 0.009099  | 0        | 0        | 2.782925 | 15.62489 | 21.39111 | 4.019918 |
| 9678  | OTC       | 7.30314  | 3.958748 | 1.34782  | 2.937149 | 0.003312  | 0.009099  | 0        | 0        | 2.782925 | 15.62489 | 21.39111 | 4.019918 |
| 9862  | LOC119626 | 5.085789 | 3.957545 | 1.369125 | 2.890565 | 0.003846  | 0.010366  | 0        | 0.547412 | 1.391463 | 6.696381 | 12.83466 | 9.044815 |
| 76    | SLC43A2   | 2853.447 | 3.955873 | 0.150102 | 26.35453 | 4.55E-153 | 1.59E-150 | 392.4705 | 268.2318 | 377.0864 | 5167.374 | 4834.39  | 6081.131 |
| 7690  | MAT1A     | 8.585182 | 3.95475  | 1.131109 | 3.496347 | 0.000472  | 0.001631  | 0        | 1.094824 | 2.087194 | 15.62489 | 25.66933 | 7.034856 |
| 7002  | MARVELD1  | 12.27679 | 3.953536 | 1.059494 | 3.731533 | 0.00019   | 0.000723  | 0        | 1.094824 | 3.478657 | 24.5534  | 38.50399 | 6.029877 |
| 6868  | NME8      | 14.34603 | 3.952177 | 1.042949 | 3.789425 | 0.000151  | 0.000584  | 0        | 0.547412 | 4.87012  | 24.5534  | 47.06043 | 9.044815 |
| 15093 | LOC119619 | 32.26808 | 3.95101  | 2.174149 | 1.817267 | 0.069176  | 0.121848  | 0        | 0        | 11.82743 | 60.26743 | 98.39909 | 23.11453 |
| 140   | FLRT2     | 412.2327 | 3.950466 | 0.174093 | 22.69169 | 5.41E-114 | 1.03E-111 | 46.61943 | 58.02565 | 45.22254 | 787.9408 | 748.6887 | 786.8989 |
| 4471  | SELL      | 22.74822 | 3.950133 | 0.785588 | 5.028252 | 4.95E-07  | 2.94E-06  | 0.542086 | 1.094824 | 6.957314 | 53.57105 | 49.19955 | 25.12449 |
| 5670  | SLC16A4   | 11.80254 | 3.949726 | 0.910196 | 4.339423 | 1.43E-05  | 6.70E-05  | 0.542086 | 1.094824 | 2.782925 | 26.78552 | 23.53022 | 16.07967 |
| 10413 | LOC119621 | 5.315034 | 3.94904  | 1.428998 | 2.763503 | 0.005718  | 0.0146    | 0        | 0        | 2.087194 | 8.928508 | 12.83466 | 8.039836 |
| 5575  | TFAP2B    | 19.64645 | 3.948932 | 0.900969 | 4.382985 | 1.17E-05  | 5.58E-05  | 0        | 0.547412 | 6.957314 | 46.87467 | 36.36488 | 27.13445 |
| 10696 | SPATC1    | 5.404592 | 3.947655 | 1.465967 | 2.692867 | 0.007084  | 0.017606  | 0        | 0        | 2.087194 | 15.62489 | 10.69555 | 4.019918 |
| 10284 | CDHR3     | 5.196873 | 3.947249 | 1.413736 | 2.792069 | 0.005237  | 0.013538  | 0        | 0.547412 | 1.391463 | 13.39276 | 12.83466 | 3.014938 |
| 10488 | LOC119621 | 5.352062 | 3.947194 | 1.436689 | 2.747423 | 0.006007  | 0.015225  | 0        | 0        | 2.087194 | 11.16063 | 12.83466 | 6.029877 |
| 10068 | LOC103241 | 5.144342 | 3.946559 | 1.386388 | 2.846648 | 0.004418  | 0.011667  | 0        | 0.547412 | 1.391463 | 8.928508 | 14.97377 | 5.024897 |
| 10000 | LOC119619 | 7.182576 | 3.944845 | 1.37848  | 2.861736 | 0.004213  | 0.011201  | 0        | 0        | 2.782925 | 4.464254 | 27.80844 | 8.039836 |
| 10321 | LOC103240 | 5.18137  | 3.943584 | 1.416966 | 2.783119 | 0.005384  | 0.013866  | 0        | 0.547412 | 1.391463 | 11.16063 | 14.97377 | 3.014938 |
| 8592  | LOC119620 | 6.789292 | 3.940771 | 1.219471 | 3.231541 | 0.001231  | 0.00381   | 0        | 0.547412 | 2.087194 | 8.928508 | 17.11289 | 12.05975 |
| 4754  | PTPRD     | 22.37636 | 3.938801 | 0.813688 | 4.840677 | 1.29E-06  | 7.23E-06  | 2.168345 | 0        | 6.261582 | 49.10679 | 55.61688 | 21.10457 |
| 9116  | SEMA3E    | 6.96841  | 3.93834  | 1.279139 | 3.078899 | 0.002078  | 0.006059  | 0        | 0.547412 | 2.087194 | 22.32127 | 12.83466 | 4.019918 |
| 8282  | ZAN       | 68.97099 | 3.937969 | 1.186373 | 3.319335 | 0.000902  | 0.002896  | 1.626259 | 1.642235 | 22.2634  | 156.2489 | 164.7115 | 67.33362 |
| 4468  | MYH3      | 22.36866 | 3.937347 | 0.782588 | 5.031185 | 4.87E-07  | 2.90E-06  | 1.084173 | 1.094824 | 6.261582 | 44.64254 | 62.03421 | 19.09461 |
| 11158 | SMIM9     | 5.410615 | 3.936968 | 1.520063 | 2.590004 | 0.009597  | 0.022867  | 0        | 0        | 2.087194 | 13.39276 | 14.97377 | 2.009959 |
| 10813 | ADAD1     | 5.284028 | 3.936136 | 1.475462 | 2.66773  | 0.007637  | 0.018775  | 0        | 0        | 2.087194 | 4.464254 | 17.11289 | 8.039836 |
| 7144  | ARRDC5    | 8.38925  | 3.93254  | 1.067879 | 3.68257  | 0.000231  | 0.000859  | 0.542086 | 0.547412 | 2.087194 | 17.85702 | 19.252   | 10.04979 |
| 5586  | OPCML     | 13.3474  | 3.932479 | 0.898053 | 4.378896 | 1.19E-05  | 5.68E-05  | 0.542086 | 1.642235 | 2.782925 | 24.5534  | 38.50399 | 12.05975 |
| 14390 | NXPH1     | 3.608073 | 3.931744 | 2.021158 | 1.945293 | 0.05174   | 0.095585  | 0        | 0        | 1.391463 | 0        | 19.252   | 1.004979 |
| 7870  | LOC103240 | 10.70412 | 3.930879 | 1.139824 | 3.44867  | 0.000563  | 0.001903  | 0        | 0        | 4.174388 | 22.32127 | 25.66933 | 12.05975 |
| 14084 | RARRES2   | 18.60533 | 3.929414 | 1.967551 | 1.997109 | 0.045813  | 0.086477  | 0        | 0        | 6.957314 | 42.41041 | 49.19955 | 13.06473 |
| 1890  | CRTAC1    | 42.88463 | 3.928386 | 0.478067 | 8.217229 | 2.08E-16  | 2.93E-15  | 3.794605 | 6.02153  | 6.261582 | 82.5887  | 64.17332 | 94.46807 |
| 7769  | LOC103221 | 8.619382 | 3.927789 | 1.131321 | 3.471862 | 0.000517  | 0.001769  | 0        | 0.547412 | 2.782925 | 20.08914 | 19.252   | 9.044815 |
| 16032 | LOC103241 | 1.734508 | 3.926438 | 2.364575 | 1.660526 | 0.096809  | 0.160533  | 0        | 0        | 0.695731 | 6.696381 | 0        | 3.014938 |
| 9657  | IRS4      | 6.943427 | 3.925967 | 1.333132 | 2.94472  | 0.00323   | 0.008893  | 0        | 0.547412 | 2.087194 | 15.62489 | 21.39111 | 2.009959 |
| 15349 | CTXN3     | 1.657258 | 3.925524 | 2.216917 | 1.770713 | 0.076608  | 0.132688  | 0        | 0.547412 | 0        | 2.232127 | 2.139111 | 5.024897 |
| 16248 | LOC119621 | 1.771536 | 3.925249 | 2.426443 | 1.617697 | 0.105728  | 0.172992  | 0        | 0        | 0.695731 | 8.928508 | 0        | 1.004979 |
| 7249  | SLC26A8   | 8.16514  | 3.924903 | 1.074283 | 3.653509 | 0.000259  | 0.000949  | 1.084173 | 0.547412 | 1.391463 | 13.39276 | 23.53022 | 9.044815 |
| 8056  | LYVE1     | 8.624517 | 3.922858 | 1.154765 | 3.397106 | 0.000681  | 0.002247  | 0.542086 | 0        | 2.782925 | 17.85702 | 23.53022 | 7.034856 |
| 9266  | TRDN      | 6.838365 | 3.921316 | 1.289647 | 3.040611 | 0.002361  | 0.006774  | 0        | 0.547412 | 2.087194 | 6.696381 | 25.66933 | 6.029877 |
| 7639  | SMIM23    | 12.49719 | 3.919761 | 1.115944 | 3.512507 | 0.000444  | 0.001545  | 0        | 0        | 4.87012  | 31.24978 | 27.80844 | 11.05477 |
| 16297 | LOC119624 | 1.62023  | 3.918765 | 2.438256 | 1.6072   | 0.10801   | 0.176196  | 0        | 0.547412 | 0        | 0        | 2.139111 | 7.034856 |
| 8094  | ITLN1     | 8.402183 | 3.918399 | 1.158533 | 3.382208 | 0.000719  | 0.002361  | 0        | 1.094824 | 2.087194 | 13.39276 | 27.80844 | 6.029877 |
| 5346  | FUT7      | 15.18414 | 3.91695  | 0.872357 | 4.490076 | 7.12E-06  | 3.54E-05  | 0.542086 | 1.094824 | 4.174388 | 42.41041 | 27.80844 | 15.07469 |
| 5198  | HNF4A     | 28.20596 | 3.916758 | 0.855057 | 4.580698 | 4.63E-06  | 2.37E-05  | 0        | 1.094824 | 9.740239 | 66.96381 | 66.31243 | 25.12449 |
| 7271  | LOC119621 | 10.34441 | 3.916154 | 1.074519 | 3.644566 | 0.000268  | 0.000979  | 0        | 0.547412 | 3.478657 | 22.32127 | 25.66933 | 10.04979 |
| 12477 | LOC103234 | 3.26041  | 3.91604  | 1.698839 | 2.305128 | 0.021159  | 0.045085  | 0.542086 | 0        | 0.695731 | 11.16063 | 2.139111 | 5.024897 |
| 8702  | SHISA7    | 8.848626 | 3.915696 | 1.222975 | 3.201779 | 0.001366  | 0.004173  | 0        | 0        | 3.478657 | 22.32127 | 19.252   | 8.039836 |
| 4981  | PDZRN4    | 14.30666 | 3.915248 | 0.833318 | 4.698387 | 2.62E-06  | 1.40E-05  | 2.710432 | 1.094824 | 1.391463 | 33.4819  | 32.08666 | 15.07469 |
| 15229 | LOC119618 | 1.694286 | 3.914625 | 2.186508 | 1.790355 | 0.073397  | 0.128128  | 0        | 0.547412 | 0        | 4.464254 | 2.139111 | 3.014938 |
| 15192 | LOC103238 | 1.719006 | 3.914569 | 2.178227 | 1.797135 | 0.072314  | 0.126537  | 0        | 0        | 0.695731 | 4.464254 | 2.139111 | 3.014938 |
| 15193 | LOC119621 | 1.719006 | 3.914569 | 2.178227 | 1.797135 | 0.072314  | 0.126537  | 0        | 0        | 0.695731 | 4.464254 | 2.139111 | 3.014938 |
| 6238  | LOC103241 | 13.42554 | 3.910169 | 0.963759 | 4.057206 | 4.97E-05  | 0.000212  | 0        | 1.642235 | 3.478657 | 29.01765 | 36.36488 | 10.04979 |
| 2211  | EBI3      | 36.05627 | 3.9097   | 0.515647 | 7.58212  | 3.40E-14  | 4.09E-13  | 4.336691 | 4.379295 | 4.87012  | 49.10679 | 81.28621 | 72.35852 |
| 4743  | CACNA1S   | 18.53862 | 3.908879 | 0.805374 | 4.853494 | 1.21E-06  | 6.80E-06  | 0.542086 | 1.094824 | 5.565851 | 42.41041 | 38.50399 | 23.11453 |
| 4649  | LOC103211 | 18.44906 | 3.908755 | 0.79493  | 4.917103 | 8.78E-07  | 5.02E-06  | 0.542086 | 1.094824 | 5.565851 | 35.71403 | 40.6431  | 27.13445 |
| 12475 | COL10A1   | 3.422509 | 3.908542 | 1.695374 | 2.905416 | 0.021143  | 0.045058  | 0        | 0        | 1.391463 | 6.696381 | 6.417332 | 6.029877 |
| 4842  | LOC119620 | 22.17256 | 3.908214 | 0.816405 | 4.787102 | 1.69E-06  | 9.29E-06  | 0        | 1.642235 | 6.       |          |          |          |



|       |           |          |          |          |          |          |          |          |          |          |          |          |          |
|-------|-----------|----------|----------|----------|----------|----------|----------|----------|----------|----------|----------|----------|----------|
| 12202 | LOC103216 | 3.229405 | 3.905983 | 1.650779 | 2.366146 | 0.017974 | 0.039161 | 0.542086 | 0        | 0.695731 | 6.696381 | 6.417332 | 5.024897 |
| 3590  | LOC103240 | 25.59005 | 3.905126 | 0.678401 | 5.75637  | 8.59E-09 | 6.36E-08 | 0.542086 | 4.926706 | 4.174388 | 42.41041 | 66.31243 | 35.17428 |
| 15498 | LOC119619 | 1.730426 | 3.904666 | 2.23797  | 1.744736 | 0.081031 | 0.138999 | 0.542086 | 0        | 0        | 6.696381 | 2.139111 | 1.004979 |
| 15497 | LOC103240 | 1.731314 | 3.904649 | 2.237678 | 1.744955 | 0.080993 | 0.138942 | 0        | 0.547412 | 0        | 6.696381 | 2.139111 | 1.004979 |
| 15238 | LOC103225 | 1.703503 | 3.904417 | 2.182218 | 1.789197 | 0.073583 | 0.128327 | 0        | 0        | 0.695731 | 2.232127 | 4.278221 | 3.014938 |
| 15240 | LOC119619 | 1.703503 | 3.904417 | 2.182218 | 1.789197 | 0.073583 | 0.128327 | 0        | 0        | 0.695731 | 2.232127 | 4.278221 | 3.014938 |
| 15241 | TYR       | 1.703503 | 3.904417 | 2.182218 | 1.789197 | 0.073583 | 0.128327 | 0        | 0        | 0.695731 | 2.232127 | 4.278221 | 3.014938 |
| 15242 | B3GALT2   | 1.703503 | 3.904417 | 2.182218 | 1.789197 | 0.073583 | 0.128327 | 0        | 0        | 0.695731 | 2.232127 | 4.278221 | 3.014938 |
| 15243 | LOC119619 | 1.703503 | 3.904417 | 2.182218 | 1.789197 | 0.073583 | 0.128327 | 0        | 0        | 0.695731 | 2.232127 | 4.278221 | 3.014938 |
| 15449 | ALDOB     | 1.756034 | 3.904173 | 2.229658 | 1.751019 | 0.079943 | 0.13746  | 0        | 0        | 0.695731 | 6.696381 | 2.139111 | 1.004979 |
| 15450 | CCR6      | 1.756034 | 3.904173 | 2.229658 | 1.751019 | 0.079943 | 0.13746  | 0        | 0        | 0.695731 | 6.696381 | 2.139111 | 1.004979 |
| 15453 | LOC103216 | 1.756034 | 3.904173 | 2.229658 | 1.751019 | 0.079943 | 0.13746  | 0        | 0        | 0.695731 | 6.696381 | 2.139111 | 1.004979 |
| 15455 | LOC119620 | 1.756034 | 3.904173 | 2.229658 | 1.751019 | 0.079943 | 0.13746  | 0        | 0        | 0.695731 | 6.696381 | 2.139111 | 1.004979 |
| 15457 | RANBP3L   | 1.756034 | 3.904173 | 2.229658 | 1.751019 | 0.079943 | 0.13746  | 0        | 0        | 0.695731 | 6.696381 | 2.139111 | 1.004979 |
| 15458 | LOC103220 | 1.756034 | 3.904173 | 2.229658 | 1.751019 | 0.079943 | 0.13746  | 0        | 0        | 0.695731 | 6.696381 | 2.139111 | 1.004979 |
| 15459 | TBC1D3B   | 1.756034 | 3.904173 | 2.229658 | 1.751019 | 0.079943 | 0.13746  | 0        | 0        | 0.695731 | 6.696381 | 2.139111 | 1.004979 |
| 15461 | LOC119620 | 1.756034 | 3.904173 | 2.229658 | 1.751019 | 0.079943 | 0.13746  | 0        | 0        | 0.695731 | 6.696381 | 2.139111 | 1.004979 |
| 12571 | SBSPON    | 3.459537 | 3.90364  | 1.705161 | 2.289309 | 0.022061 | 0.046648 | 0        | 0        | 1.391463 | 8.928508 | 6.417332 | 4.019918 |
| 12572 | TCL1A     | 3.459537 | 3.90364  | 1.705161 | 2.289309 | 0.022061 | 0.046648 | 0        | 0        | 1.391463 | 8.928508 | 6.417332 | 4.019918 |
| 12573 | KIT       | 3.459537 | 3.90364  | 1.705161 | 2.289309 | 0.022061 | 0.046648 | 0        | 0        | 1.391463 | 8.928508 | 6.417332 | 4.019918 |
| 2638  | LOC119620 | 47.31377 | 3.903507 | 0.564179 | 6.91892  | 4.55E-12 | 4.59E-11 | 4.878777 | 3.284471 | 9.740239 | 82.5887  | 141.1813 | 42.20914 |
| 9710  | LOC119620 | 6.831031 | 3.902973 | 1.333793 | 2.926221 | 0.003431 | 0.009394 | 0.542086 | 0        | 2.087194 | 26.78552 | 8.556443 | 3.014938 |
| 12480 | LOC119620 | 3.177762 | 3.902804 | 1.69353  | 2.304538 | 0.021192 | 0.045144 | 0        | 0.547412 | 0.695731 | 2.232127 | 8.556443 | 7.034856 |
| 8673  | LOC119620 | 6.495837 | 3.902052 | 1.215324 | 3.21071  | 0.001324 | 0.004059 | 1.084173 | 0        | 1.391463 | 15.62489 | 12.83466 | 8.039836 |
| 12598 | LOC103240 | 3.407006 | 3.90169  | 1.708233 | 2.28405  | 0.022369 | 0.047203 | 0        | 0        | 1.391463 | 4.464254 | 8.556443 | 6.029877 |
| 7735  | ZNF366    | 12.33917 | 3.9006   | 1.120376 | 3.481511 | 0.000499 | 0.001714 | 0        | 0        | 4.87012  | 35.71403 | 21.39111 | 12.05975 |
| 1310  | LRRTM4    | 59.64114 | 3.900571 | 0.397142 | 9.821609 | 9.09E-23 | 1.84E-21 | 7.047123 | 7.663765 | 7.653045 | 116.0706 | 121.9293 | 97.48301 |
| 8734  | KCNF1     | 6.674326 | 3.899503 | 1.221361 | 3.192752 | 0.001409 | 0.004289 | 0        | 0.547412 | 2.087194 | 13.39276 | 14.97377 | 9.044815 |
| 6706  | CTSE      | 13.59277 | 3.899295 | 1.012094 | 3.852702 | 0.000117 | 0.000463 | 0        | 1.094824 | 4.174388 | 22.32127 | 44.92132 | 9.044815 |
| 12595 | SIGLEC1   | 3.444034 | 3.898193 | 1.706092 | 2.284867 | 0.022321 | 0.047113 | 0        | 0        | 1.391463 | 6.696381 | 8.556443 | 4.019918 |
| 12351 | LOC119620 | 3.266433 | 3.898173 | 1.67033  | 2.333774 | 0.019608 | 0.042204 | 0.542086 | 0        | 0.695731 | 8.928508 | 6.417332 | 3.014938 |
| 13365 | GPR152    | 3.090606 | 3.897422 | 1.82658  | 2.133726 | 0.032865 | 0.065374 | 0        | 1.094824 | 0        | 11.16063 | 4.278221 | 2.009959 |
| 13031 | LOC119620 | 3.036301 | 3.897397 | 1.772628 | 2.198655 | 0.027902 | 0.056925 | 1.084173 | 0        | 0        | 6.696381 | 6.417332 | 4.019918 |
| 10308 | DYRK4     | 6.103699 | 3.895406 | 1.397713 | 2.786987 | 0.00532  | 0.013721 | 0        | 2.189647 | 0        | 11.16063 | 19.252   | 4.019918 |
| 11533 | TRIM50    | 26.8781  | 3.894508 | 1.553395 | 2.507093 | 0.012173 | 0.02806  | 0        | 0.547412 | 9.740239 | 49.10679 | 72.72976 | 29.1444  |
| 15424 | LOC119620 | 1.715811 | 3.892653 | 2.215896 | 1.756695 | 0.07897  | 0.136087 | 0        | 0.547412 | 0        | 4.464254 | 4.278221 | 1.004979 |
| 15425 | LOC119620 | 1.715811 | 3.892653 | 2.215896 | 1.756695 | 0.07897  | 0.136087 | 0        | 0.547412 | 0        | 4.464254 | 4.278221 | 1.004979 |
| 15426 | SMCO3     | 1.715811 | 3.892653 | 2.215896 | 1.756695 | 0.07897  | 0.136087 | 0        | 0.547412 | 0        | 4.464254 | 4.278221 | 1.004979 |
| 15427 | LOC103225 | 1.715811 | 3.892653 | 2.215896 | 1.756695 | 0.07897  | 0.136087 | 0        | 0.547412 | 0        | 4.464254 | 4.278221 | 1.004979 |
| 6532  | SCN7A     | 13.52777 | 3.892386 | 0.991417 | 3.926084 | 8.63E-05 | 0.000351 | 0        | 1.094824 | 4.174388 | 40.17829 | 25.66933 | 10.04979 |
| 15383 | LOC103240 | 1.740531 | 3.89218  | 2.207808 | 1.762916 | 0.077915 | 0.134626 | 0        | 0        | 0.695731 | 4.464254 | 4.278221 | 1.004979 |
| 15384 | C1QTNF8   | 1.740531 | 3.89218  | 2.207808 | 1.762916 | 0.077915 | 0.134626 | 0        | 0        | 0.695731 | 4.464254 | 4.278221 | 1.004979 |
| 15385 | KLRK1     | 1.740531 | 3.89218  | 2.207808 | 1.762916 | 0.077915 | 0.134626 | 0        | 0        | 0.695731 | 4.464254 | 4.278221 | 1.004979 |
| 15386 | LOC103230 | 1.740531 | 3.89218  | 2.207808 | 1.762916 | 0.077915 | 0.134626 | 0        | 0        | 0.695731 | 4.464254 | 4.278221 | 1.004979 |
| 12717 | TOX3      | 2.984657 | 3.891989 | 1.726481 | 2.25429  | 0.024178 | 0.050544 | 0.542086 | 0.547412 | 0        | 2.232127 | 8.556443 | 6.029877 |
| 10358 | PATE1     | 4.778607 | 3.891746 | 1.402764 | 2.774341 | 0.005531 | 0.014197 | 0        | 1.094824 | 0.695731 | 11.16063 | 10.69555 | 5.024897 |
| 10834 | LOC119620 | 5.184565 | 3.890692 | 1.460767 | 2.663459 | 0.007734 | 0.018977 | 0        | 0        | 2.087194 | 11.16063 | 12.83466 | 5.024897 |
| 10835 | ADAD2     | 5.184565 | 3.890692 | 1.460767 | 2.663459 | 0.007734 | 0.018977 | 0        | 0        | 2.087194 | 11.16063 | 12.83466 | 5.024897 |
| 4277  | SLC34A1   | 33.98228 | 3.889945 | 0.752095 | 5.172147 | 2.31E-07 | 1.44E-06 | 2.168345 | 0        | 11.1317  | 82.5887  | 57.75599 | 50.24897 |
| 10074 | LOC119620 | 6.99313  | 3.888031 | 1.366675 | 2.844884 | 0.004443 | 0.011724 | 0        | 0        | 2.782925 | 22.32127 | 12.83466 | 4.019918 |
| 8620  | LOC103240 | 8.50547  | 3.887809 | 1.206088 | 3.223486 | 0.001266 | 0.003906 | 0        | 0        | 3.478657 | 15.62489 | 12.83466 | 19.09461 |
| 11818 | LOC103240 | 5.274124 | 3.88706  | 1.590424 | 2.444041 | 0.014524 | 0.032672 | 0        | 0        | 2.087194 | 17.85702 | 10.69555 | 1.004979 |
| 9181  | LOC119620 | 6.52516  | 3.887041 | 1.270078 | 3.060474 | 0.00221  | 0.006398 | 0        | 1.094824 | 1.391463 | 13.39276 | 19.252   | 4.019918 |
| 8077  | LOC119619 | 8.213161 | 3.886702 | 1.146529 | 3.389974 | 0.000699 | 0.002301 | 0        | 1.094824 | 2.087194 | 13.39276 | 25.66933 | 7.034856 |
| 12919 | FMOD      | 3.465559 | 3.886332 | 1.752027 | 2.218192 | 0.026542 | 0.05462  | 0        | 0        | 1.391463 | 6.696381 | 10.69555 | 2.009959 |
| 10929 | TBXT      | 5.169062 | 3.886192 | 1.469255 | 2.645009 | 0.008169 | 0.019871 | 0        | 0        | 2.087194 | 8.928508 | 14.97377 | 5.024897 |
| 13169 | LOC103230 | 3.022573 | 3.885809 | 1.785116 | 2.176783 | 0.029497 | 0.059547 | 0        | 1.094824 | 0        | 4.464254 | 8.556443 | 4.019918 |
| 10437 | SYT2      | 42.72222 | 3.885375 | 1.408625 | 2.758274 | 0.005811 | 0.014801 | 0.542086 | 0.547412 | 15.30609 | 73.66019 | 124.0684 | 42.20914 |
| 7824  | GRK1      | 7.842455 | 3.884857 | 1.122938 | 3.459548 | 0.000541 | 0.001839 | 1.084173 | 1.094824 | 0.695731 | 15.62489 | 23.53022 | 5.024897 |
| 2372  | LOC103240 | 34.72315 | 3.884422 | 0.53143  | 7.309375 | 2.68E-13 | 3.01E-12 | 4.336691 | 2.737059 | 6.261582 | 64.73168 | 77.00798 | 53.26391 |
| 12503 | LOC119620 | 3.236315 | 3.884393 | 1.688424 | 2.300603 | 0.021414 | 0.045533 | 0        | 0.547412 | 0.695731 | 4.464254 | 10.69555 | 3.014938 |
| 14654 | TRIM77    | 3.013093 | 3.884102 | 2.048208 | 1.896342 | 0.057915 | 0.105068 | 0        | 1.094824 | 0        | 0        | 14.97377 | 2.009959 |
| 15601 | LOC119620 | 1.700308 | 3.883504 | 2.245698 | 1.729308 | 0.083754 | 0.142728 | 0        | 0.547412 | 0        | 2.232127 | 6.417332 | 1.004979 |
| 15548 | UTS2B     | 1.725028 | 3.883077 | 2.237459 | 1.735485 | 0.082655 | 0.141302 | 0        | 0        | 0.695731 | 2.232127 | 6.417332 | 1.004979 |
| 15550 | LOC103230 | 1.725028 | 3.883077 | 2.237459 | 1.735485 | 0.082655 | 0.141302 | 0        | 0        | 0.695731 | 2.232127 | 6.417332 | 1.004979 |
| 15551 | LOC119620 | 1.725028 | 3.883077 | 2.237459 | 1.735485 | 0.082655 | 0.141302 | 0        | 0        | 0.695731 | 2.232127 | 6.417332 | 1.004979 |
| 13095 | LOC119620 | 3.413029 | 3.881292 | 1.773665 | 2.188289 | 0.028649 | 0.058157 | 0        | 0        | 1.391463 | 2.232127 | 12.83466 | 4.019918 |
| 13096 | LOC119619 | 3.413029 | 3.881292 | 1.773665 | 2.188289 | 0.028649 | 0.058157 | 0        | 0        | 1.391463 | 2.232127 | 12.83466 | 4.019918 |
| 16449 | LOC119619 | 1.684806 | 3.880972 | 2.456233 | 1.58005  | 0.114095 | 0.184408 | 0        | 0.547412 | 0        | 0        | 8.556443 | 1.004979 |
| 11082 | ALX3      | 5.15356  | 3.880805 | 1.487145 | 2.609568 | 0.009066 | 0.021746 | 0        | 0        | 2.087194 | 6.696381 | 17.11289 | 5.024897 |
| 16414 | LOC119620 | 1.709526 | 3.880639 | 2.446079 | 1.586473 | 0.112632 | 0.18238  | 0        | 0        | 0.695731 | 0        | 8.556443 | 1.004979 |
| 16415 | LOC103220 | 1.709526 | 3.880639 | 2.446079 | 1.586473 | 0.112632 | 0.18238  | 0        | 0        | 0.695731 | 0        | 8.556443 | 1.004979 |
| 16416 | LOC119620 | 1.709526 | 3.880639 | 2.446079 | 1.586473 | 0.112632 | 0.18238  | 0        | 0        | 0.695731 | 0        | 8.556443 | 1.004979 |
| 16417 | LOC103230 | 1.709526 | 3.880639 | 2.446079 | 1.586473 | 0.112632 | 0.18238  | 0        | 0        | 0.695731 | 0        |          |          |



|       |           |          |          |          |          |          |          |          |          |          |          |          |          |
|-------|-----------|----------|----------|----------|----------|----------|----------|----------|----------|----------|----------|----------|----------|
| 16418 | SCGB3A1   | 1.709526 | 3.880639 | 2.446079 | 1.586473 | 0.112632 | 0.18238  | 0        | 0        | 0.695731 | 0        | 8.556443 | 1.004979 |
| 8489  | PRG2      | 10.25699 | 3.880254 | 1.190926 | 3.258182 | 0.001121 | 0.003511 | 0        | 0.547412 | 3.478657 | 24.5534  | 29.94755 | 3.014938 |
| 10051 | TMPRSS3   | 6.946621 | 3.879674 | 1.361009 | 2.850587 | 0.004364 | 0.011542 | 0        | 0        | 2.782925 | 15.62489 | 19.252   | 4.019918 |
| 13109 | LOC119618 | 3.450057 | 3.879441 | 1.774802 | 2.185844 | 0.028827 | 0.058461 | 0        | 0        | 1.391463 | 4.464254 | 12.83466 | 2.009959 |
| 11815 | OTUD6A    | 5.243118 | 3.879377 | 1.58634  | 2.445489 | 0.014466 | 0.032549 | 0        | 0        | 2.087194 | 13.39276 | 14.97377 | 1.004979 |
| 5385  | CUNH1orf1 | 18.32718 | 3.879016 | 0.867297 | 4.472536 | 7.73E-06 | 3.82E-05 | 0.542086 | 1.094824 | 5.565851 | 26.78552 | 59.8951  | 16.07967 |
| 215   | GJB5      | 303.0472 | 3.876193 | 0.196779 | 19.69822 | 2.23E-86 | 2.76E-84 | 36.86187 | 38.31883 | 41.04815 | 622.7634 | 498.4128 | 580.8781 |
| 2977  | LOC103232 | 26.44357 | 3.875413 | 0.600408 | 6.454631 | 1.08E-10 | 9.69E-10 | 2.710432 | 3.831883 | 3.478657 | 53.57105 | 59.8951  | 35.17428 |
| 11855 | TREML1    | 5.227616 | 3.87516  | 1.591727 | 2.434563 | 0.01491  | 0.033435 | 0        | 0        | 2.087194 | 11.16063 | 17.11289 | 1.004979 |
| 7871  | LACRT     | 12.12516 | 3.872554 | 1.123043 | 3.448267 | 0.000564 | 0.001906 | 0        | 0        | 4.87012  | 29.01765 | 27.80844 | 11.05477 |
| 5460  | LOC103248 | 15.72026 | 3.872426 | 0.872889 | 4.43633  | 9.15E-06 | 4.46E-05 | 0        | 3.284471 | 2.782925 | 20.08914 | 47.06043 | 21.10457 |
| 1869  | CYP17A1   | 45.11557 | 3.871877 | 0.46896  | 8.256301 | 1.50E-16 | 2.14E-15 | 6.505036 | 7.663765 | 2.782925 | 80.35657 | 91.98176 | 81.40334 |
| 5157  | EXOC3L2   | 16.38558 | 3.871841 | 0.841875 | 4.599072 | 4.24E-06 | 2.19E-05 | 0.542086 | 1.094824 | 4.87012  | 26.78552 | 44.92132 | 20.09959 |
| 13337 | LOC103231 | 3.242337 | 3.871177 | 1.808505 | 2.14054  | 0.032311 | 0.064407 | 0        | 0.547412 | 0.695731 | 2.232127 | 14.97377 | 1.004979 |
| 4123  | ADAMTSL2  | 19.13879 | 3.870155 | 0.733577 | 5.27573  | 1.32E-07 | 8.53E-07 | 2.168345 | 1.094824 | 4.174388 | 44.64254 | 40.6431  | 22.10955 |
| 8447  | LOC119621 | 10.32262 | 3.867399 | 1.182822 | 3.269637 | 0.001077 | 0.003389 | 0        | 0        | 4.174388 | 15.62489 | 32.08666 | 10.04979 |
| 697   | TTN       | 166.7919 | 3.86704  | 0.301139 | 12.84137 | 9.62E-38 | 3.67E-36 | 15.7205  | 20.80165 | 27.82925 | 310.2657 | 400.0137 | 226.1204 |
| 7602  | LOC103211 | 13.83469 | 3.86487  | 1.096506 | 3.524714 | 0.000424 | 0.001483 | 0        | 0        | 5.565851 | 29.01765 | 36.36488 | 12.05975 |
| 7932  | FABP7     | 7.928557 | 3.86119  | 1.12557  | 3.43043  | 0.000603 | 0.00202  | 0        | 1.094824 | 2.087194 | 8.928508 | 21.39111 | 14.06971 |
| 4556  | EXD1      | 15.6285  | 3.860962 | 0.776917 | 4.96959  | 6.71E-07 | 3.92E-06 | 1.084173 | 2.189647 | 2.782925 | 31.24978 | 36.36488 | 20.09959 |
| 15430 | CLDN7     | 35.78805 | 3.8587   | 2.1983   | 1.755311 | 0.079206 | 0.136459 | 0        | 0        | 13.91463 | 91.51721 | 79.14709 | 30.14938 |
| 481   | ENPP2     | 165.3467 | 3.858339 | 0.260444 | 14.81444 | 1.18E-49 | 6.53E-48 | 17.34676 | 23.53871 | 23.65487 | 299.105  | 271.6671 | 356.7677 |
| 6725  | LOC119623 | 13.40092 | 3.857493 | 1.002805 | 3.846703 | 0.00012  | 0.000473 | 0        | 0.547412 | 4.87012  | 24.5534  | 36.36488 | 14.06971 |
| 9986  | TMPRSS2   | 5.88713  | 3.856811 | 1.34654  | 2.864239 | 0.00418  | 0.011128 | 0        | 2.189647 | 0        | 13.39276 | 10.69555 | 9.044815 |
| 5317  | GALNT15   | 14.16115 | 3.853855 | 0.854422 | 4.51048  | 6.47E-06 | 3.23E-05 | 0.542086 | 2.189647 | 2.782925 | 29.01765 | 36.36488 | 14.06971 |
| 10463 | LOC103232 | 4.796417 | 3.853336 | 1.39934  | 2.75368  | 0.005893 | 0.014973 | 0.542086 | 0        | 1.391463 | 13.39276 | 6.417332 | 7.034856 |
| 12561 | GYPA      | 4.716172 | 3.853265 | 1.682147 | 2.290684 | 0.021982 | 0.046524 | 0        | 1.094824 | 0.695731 | 20.08914 | 6.417332 | 0        |
| 9874  | LOC119626 | 6.76708  | 3.850766 | 1.333332 | 2.888077 | 0.003876 | 0.010436 | 0        | 0        | 2.782925 | 20.08914 | 10.69555 | 7.034856 |
| 8346  | ITK       | 7.408686 | 3.850678 | 1.167511 | 3.298195 | 0.000973 | 0.0031   | 1.084173 | 1.642235 | 0        | 11.16063 | 23.53022 | 7.034856 |
| 9460  | LOC103230 | 6.580886 | 3.84996  | 1.285569 | 2.994752 | 0.002747 | 0.007719 | 0        | 0.547412 | 2.087194 | 17.85702 | 14.97377 | 4.019918 |
| 8790  | PLAAT5    | 8.402549 | 3.84953  | 1.21207  | 3.175997 | 0.001493 | 0.004516 | 0        | 0        | 3.478657 | 15.62489 | 19.252   | 12.05975 |
| 10368 | LOC103220 | 4.781801 | 3.848039 | 1.388202 | 2.771959 | 0.005572 | 0.014287 | 0        | 0.547412 | 1.391463 | 11.16063 | 8.556443 | 7.034856 |
| 8538  | SLITRK1   | 13.82479 | 3.847603 | 1.185991 | 3.244211 | 0.001178 | 0.003667 | 0        | 0        | 5.565851 | 42.41041 | 29.94755 | 5.024897 |
| 11078 | LOC119621 | 4.657618 | 3.845163 | 1.473319 | 2.609865 | 0.009058 | 0.021737 | 0        | 1.094824 | 0.695731 | 17.85702 | 4.019918 | 14.06971 |
| 6469  | HEATR9    | 12.64127 | 3.84446  | 0.972788 | 3.952002 | 7.75E-05 | 0.000319 | 0        | 2.189647 | 2.782925 | 22.32127 | 38.50399 | 10.04979 |
| 10170 | UNCX      | 8.587689 | 3.843702 | 1.362075 | 2.821947 | 0.004773 | 0.012479 | 0        | 0        | 3.478657 | 26.78552 | 19.252   | 2.009959 |
| 6591  | SLC9A4    | 13.22138 | 3.843189 | 0.984266 | 3.904623 | 9.44E-05 | 0.000381 | 0        | 0.547412 | 4.87012  | 29.01765 | 27.80844 | 17.08465 |
| 4851  | LOC103224 | 17.2351  | 3.842175 | 0.803669 | 4.780793 | 1.75E-06 | 9.57E-06 | 1.084173 | 2.189647 | 3.478657 | 31.24978 | 51.33866 | 14.06971 |
| 8061  | GRID2     | 11.87413 | 3.841905 | 1.131344 | 3.395876 | 0.000684 | 0.002256 | 0        | 0        | 4.87012  | 20.08914 | 34.22577 | 12.05975 |
| 6718  | CD84      | 11.27915 | 3.840433 | 0.997898 | 3.848523 | 0.000119 | 0.00047  | 0        | 1.094824 | 3.478657 | 20.08914 | 29.94755 | 13.06473 |
| 898   | SERPINA3  | 87.90061 | 3.840045 | 0.334495 | 11.48014 | 1.66E-30 | 4.91E-29 | 9.757555 | 10.94824 | 13.91463 | 151.7846 | 188.2417 | 152.7569 |
| 9929  | FZD10     | 6.705069 | 3.838984 | 1.333659 | 2.878535 | 0.003995 | 0.010697 | 0        | 0        | 2.782925 | 11.16063 | 19.252   | 7.034856 |
| 3727  | TNFSF14   | 30.61167 | 3.838856 | 0.683605 | 5.615606 | 1.96E-08 | 1.40E-07 | 1.084173 | 2.189647 | 9.044508 | 58.0353  | 79.14709 | 34.1693  |
| 5396  | LOC103224 | 23.22085 | 3.838306 | 0.859748 | 4.464456 | 8.03E-06 | 3.95E-05 | 0.542086 | 0.547412 | 8.348776 | 29.01765 | 72.72976 | 28.13943 |
| 4418  | SLITRK3   | 24.32895 | 3.838214 | 0.757601 | 5.066276 | 4.06E-07 | 2.44E-06 | 0.542086 | 1.642235 | 7.653045 | 49.10679 | 59.8951  | 27.13445 |
| 4424  | CD72      | 18.57722 | 3.837997 | 0.758267 | 5.06154  | 4.16E-07 | 2.50E-06 | 0.542086 | 3.284471 | 3.478657 | 42.41041 | 40.6431  | 21.10457 |
| 7384  | LOC103215 | 9.724814 | 3.836895 | 1.063944 | 3.606293 | 0.000311 | 0.001118 | 0        | 0.547412 | 3.478657 | 17.85702 | 21.39111 | 15.07469 |
| 7129  | MAFB      | 9.627291 | 3.836055 | 1.040364 | 3.687225 | 0.000227 | 0.000845 | 0.542086 | 0.547412 | 2.782925 | 22.32127 | 23.53022 | 8.039836 |
| 6349  | LOC119618 | 14.01765 | 3.836012 | 0.957425 | 4.006591 | 6.16E-05 | 0.000258 | 2.710432 | 0        | 2.782925 | 26.78552 | 42.78221 | 9.044815 |
| 4368  | ZNF660    | 20.24962 | 3.835571 | 0.751904 | 5.101142 | 3.38E-07 | 2.05E-06 | 2.168345 | 1.642235 | 4.174388 | 31.24978 | 64.17332 | 18.08963 |
| 10707 | SULT6B1   | 4.735293 | 3.83449  | 1.425622 | 2.689696 | 0.007152 | 0.017757 | 0        | 0.547412 | 1.391463 | 4.464254 | 14.97377 | 7.034856 |
| 12355 | BMP10     | 32.93817 | 3.833325 | 1.644402 | 2.331137 | 0.019746 | 0.042489 | 0        | 0.547412 | 12.52316 | 66.96381 | 83.42532 | 34.1693  |
| 6260  | SLC39A4   | 12.85387 | 3.832686 | 0.947481 | 4.045132 | 5.23E-05 | 0.000222 | 1.084173 | 0        | 4.174388 | 31.24978 | 23.53022 | 17.08465 |
| 7326  | LOC119624 | 11.52992 | 3.832362 | 1.057232 | 3.624901 | 0.000289 | 0.001049 | 0        | 0.547412 | 4.174388 | 22.32127 | 32.08666 | 10.04979 |
| 7515  | LOC119618 | 9.729949 | 3.832355 | 1.078399 | 3.553743 | 0.00038  | 0.001344 | 0.542086 | 0        | 3.478657 | 15.62489 | 25.66933 | 13.06473 |
| 6989  | MUC20     | 9.063741 | 3.831935 | 1.025106 | 3.738086 | 0.000185 | 0.000705 | 0.542086 | 1.642235 | 1.391463 | 8.928508 | 27.80844 | 14.06971 |
| 11505 | SLC6A4    | 4.381866 | 3.831622 | 1.52389  | 2.514369 | 0.011925 | 0.027555 | 0        | 1.642235 | 0        | 8.928508 | 10.69555 | 5.024897 |
| 10678 | RBM46     | 4.772321 | 3.831478 | 1.420334 | 2.69759  | 0.006984 | 0.017389 | 0        | 0.547412 | 1.391463 | 6.696381 | 14.97377 | 5.024897 |
| 7856  | LOC103238 | 13.55568 | 3.83098  | 1.109747 | 3.45212  | 0.000556 | 0.001882 | 0        | 0        | 5.565851 | 40.17829 | 23.53022 | 12.05975 |
| 10803 | LAMB4     | 4.396481 | 3.828727 | 1.433899 | 2.670152 | 0.007582 | 0.018658 | 0.542086 | 1.094824 | 0        | 11.16063 | 8.556443 | 5.024897 |
| 12825 | LOC103233 | 3.056773 | 3.828597 | 1.713895 | 2.23858  | 0.025492 | 0.052843 | 0        | 0.547412 | 0.695731 | 8.928508 | 2.139111 | 6.029877 |
| 12826 | FAAH2     | 3.056773 | 3.828597 | 1.713895 | 2.23858  | 0.025492 | 0.052843 | 0        | 0.547412 | 0.695731 | 8.928508 | 2.139111 | 6.029877 |
| 10727 | LOC103216 | 4.647251 | 3.828143 | 1.425557 | 2.685367 | 0.007245 | 0.017954 | 0.542086 | 0.547412 | 0.695731 | 13.39276 | 10.69555 | 2.009959 |
| 12627 | LOC103224 | 3.040383 | 3.827593 | 1.681868 | 2.275799 | 0.022858 | 0.048126 | 0.542086 | 0        | 0.695731 | 6.696381 | 4.278221 | 6.029877 |
| 11488 | CACNG5    | 4.846377 | 3.826922 | 1.519139 | 2.519139 | 0.011764 | 0.027224 | 0        | 0.547412 | 1.391463 | 11.16063 | 14.97377 | 1.004979 |
| 6050  | DGKK      | 14.16691 | 3.825885 | 0.923287 | 4.143766 | 3.42E-05 | 0.00015  | 0.542086 | 1.642235 | 3.478657 | 20.08914 | 49.19955 | 10.04979 |
| 6330  | LOC119622 | 12.67547 | 3.825571 | 0.953451 | 4.012341 | 6.01E-05 | 0.000252 | 0        | 1.642235 | 3.478657 | 26.78552 | 32.08666 | 12.05975 |
| 6508  | LOC119621 | 14.35735 | 3.824342 | 0.971351 | 3.937137 | 8.25E-05 | 0.000337 | 1.626259 | 0        | 4.174388 | 20.08914 | 49.19955 | 11.05477 |
| 12880 | TRIM48    | 2.98874  | 3.823561 | 1.720466 | 2.223399 | 0.026256 | 0.054194 | 0        | 0.547412 | 0.695731 | 2.232127 | 6.417332 | 8.039836 |
| 11477 | LOC119620 | 4.986063 | 3.822018 | 1.515432 | 2.522064 | 0.011667 | 0.027025 | 0        | 0        | 2.087194 | 6.696381 | 17.11289 | 4.019918 |
| 9064  | LOC119628 | 6.295395 | 3.822012 | 1.236175 | 3.091804 | 0.001989 | 0.005835 | 0.542086 | 0        | 2.087194 | 13.39276 | 10.69555 | 11.05477 |
| 12926 | LYZL6     | 3.255012 | 3.820497 | 1.723676 | 2.162482 | 0.026658 | 0.054829 | 0        | 0        | 1.391463 | 6.696381 | 6.417332 | 5.024897 |
| 9070  | LOC103233 | 6.296283 | 3.820307 | 1        |          |          |          |          |          |          |          |          |          |



|       |           |          |          |          |          |           |           |          |          |          |          |          |          |
|-------|-----------|----------|----------|----------|----------|-----------|-----------|----------|----------|----------|----------|----------|----------|
| 8330  | SHISA9    | 7.627398 | 3.816561 | 1.154745 | 3.305112 | 0.000949  | 0.00303   | 0        | 1.642235 | 1.391463 | 11.16063 | 23.53022 | 8.039836 |
| 9255  | SLC35F3   | 8.324611 | 3.815474 | 1.254271 | 3.041985 | 0.00235   | 0.006751  | 0        | 0        | 3.478657 | 22.32127 | 17.11289 | 7.034856 |
| 8605  | LOC119621 | 11.76519 | 3.815156 | 1.182313 | 3.226857 | 0.001252  | 0.003867  | 0        | 0        | 4.87012  | 22.32127 | 36.36488 | 7.034856 |
| 9672  | LOC103241 | 6.422869 | 3.814623 | 1.298213 | 2.938366 | 0.003299  | 0.009069  | 0        | 0.547412 | 2.087194 | 22.32127 | 8.556443 | 5.024897 |
| 13103 | LOC103241 | 3.29204  | 3.814588 | 1.743979 | 2.18729  | 0.028721  | 0.058273  | 0        | 0        | 1.391463 | 8.928508 | 6.417332 | 3.014938 |
| 13053 | LOC119621 | 3.239509 | 3.813483 | 1.736788 | 2.19571  | 0.028113  | 0.057257  | 0        | 0        | 1.391463 | 4.464254 | 8.556443 | 5.024897 |
| 8815  | LOC119621 | 10.00313 | 3.812599 | 1.202564 | 3.170392 | 0.001522  | 0.004591  | 0        | 0        | 4.174388 | 17.85702 | 29.94755 | 8.039836 |
| 8496  | LOC103231 | 7.403288 | 3.809986 | 1.169712 | 3.257199 | 0.001125  | 0.003521  | 0.542086 | 1.642235 | 0.695731 | 6.696381 | 27.80844 | 7.034856 |
| 13023 | LOC119621 | 3.115326 | 3.809146 | 1.731075 | 2.200451 | 0.027775  | 0.056699  | 0        | 0.547412 | 0.695731 | 11.16063 | 4.278221 | 2.009959 |
| 5171  | CYP2B6    | 17.35965 | 3.808529 | 0.829075 | 4.593709 | 4.35E-06  | 2.24E-05  | 1.084173 | 0.547412 | 5.565851 | 26.78552 | 47.06043 | 23.11453 |
| 13244 | ATP4B     | 5.044616 | 3.807692 | 1.764059 | 2.158484 | 0.03089   | 0.062007  | 0        | 0        | 2.087194 | 8.928508 | 19.252   | 0        |
| 10214 | LOC103231 | 6.599583 | 3.806358 | 1.353405 | 2.812431 | 0.004917  | 0.012798  | 0        | 0        | 2.782925 | 20.08914 | 10.69555 | 6.029877 |
| 12922 | A1CF      | 3.098936 | 3.805768 | 1.715961 | 2.217864 | 0.026564  | 0.054653  | 0.542086 | 0        | 0.695731 | 8.928508 | 6.417332 | 2.009959 |
| 6717  | LTA       | 12.36829 | 3.805357 | 0.988657 | 3.849018 | 0.000119  | 0.000469  | 0        | 2.189647 | 2.782925 | 31.24978 | 29.94755 | 8.039836 |
| 11    | TXNDC16   | 2849.389 | 3.804496 | 0.096488 | 39.42984 | 0         | 0         | 383.2551 | 396.8736 | 361.0846 | 5209.784 | 5311.412 | 5433.924 |
| 9524  | LOC119621 | 6.360858 | 3.803211 | 1.277055 | 2.978111 | 0.0029    | 0.008096  | 0        | 0.547412 | 2.087194 | 13.39276 | 17.11289 | 5.024897 |
| 12927 | LHFPL3    | 3.099824 | 3.802571 | 1.715619 | 2.216442 | 0.026661  | 0.05483   | 0        | 0.547412 | 0.695731 | 8.928508 | 6.417332 | 2.009959 |
| 7732  | LOC103221 | 9.615871 | 3.802538 | 1.091844 | 3.482676 | 0.000496  | 0.001707  | 0        | 0.547412 | 3.478657 | 20.08914 | 23.53022 | 10.04979 |
| 13585 | LOC119621 | 3.313565 | 3.802185 | 1.81754  | 2.09194  | 0.036444  | 0.071318  | 0        | 0        | 1.391463 | 8.928508 | 8.556443 | 1.004979 |
| 6280  | ZNF831    | 12.18917 | 3.802179 | 0.941721 | 4.037477 | 5.40E-05  | 0.000229  | 0        | 2.189647 | 2.782925 | 17.85702 | 34.22577 | 16.07967 |
| 6229  | PTPN5     | 16.11191 | 3.80203  | 0.935895 | 4.062452 | 4.86E-05  | 0.000207  | 0.542086 | 0.547412 | 5.565851 | 46.87467 | 32.08666 | 11.05477 |
| 13264 | TUBAL3    | 3.261035 | 3.801606 | 1.764433 | 2.154576 | 0.031195  | 0.062519  | 0        | 0        | 1.391463 | 4.464254 | 10.69555 | 3.014938 |
| 13265 | ADGRE3    | 3.261035 | 3.801606 | 1.764433 | 2.154576 | 0.031195  | 0.062519  | 0        | 0        | 1.391463 | 4.464254 | 10.69555 | 3.014938 |
| 13064 | MYL2      | 3.030903 | 3.801387 | 1.732652 | 2.19397  | 0.028238  | 0.057463  | 0.542086 | 0        | 0.695731 | 2.232127 | 10.69555 | 4.019918 |
| 9423  | DMP1      | 6.079083 | 3.800342 | 1.265854 | 3.002196 | 0.00268   | 0.007562  | 0        | 1.094824 | 1.391463 | 6.696381 | 19.252   | 8.039836 |
| 13537 | SMCO1     | 2.922222 | 3.799177 | 1.808525 | 2.100705 | 0.035667  | 0.07005   | 0.542086 | 0.547412 | 0        | 11.16063 | 4.278221 | 1.004979 |
| 9074  | ANGPTL4   | 5.953125 | 3.797191 | 1.228855 | 3.090023 | 0.002001  | 0.005864  | 1.084173 | 0.547412 | 0.695731 | 13.39276 | 14.97377 | 5.024897 |
| 8164  | LOC119621 | 9.451202 | 3.796512 | 1.129991 | 3.359772 | 0.00078   | 0.00254   | 0        | 1.094824 | 2.782925 | 17.85702 | 29.94755 | 5.024897 |
| 13580 | CLEC9A    | 2.870579 | 3.796105 | 1.813968 | 2.092708 | 0.036375  | 0.071212  | 0        | 1.094824 | 0        | 6.696381 | 6.417332 | 3.014938 |
| 13647 | LOC103211 | 3.298063 | 3.795893 | 1.824878 | 2.08008  | 0.037518  | 0.073087  | 0        | 0        | 1.391463 | 6.696381 | 10.69555 | 1.004979 |
| 5566  | LOC103241 | 13.82935 | 3.795355 | 0.864992 | 4.387735 | 1.15E-05  | 5.47E-05  | 0.542086 | 1.642235 | 3.478657 | 29.01765 | 34.22577 | 14.06971 |
| 14416 | LOC119621 | 2.859324 | 3.793101 | 1.954565 | 1.940637 | 0.052302  | 0.096452  | 1.084173 | 0        | 0        | 2.232127 | 12.83466 | 1.004979 |
| 5389  | ADAMTSL1  | 21.45376 | 3.792396 | 0.848459 | 4.469744 | 7.83E-06  | 3.86E-05  | 0        | 3.831883 | 4.87012  | 51.33892 | 55.61688 | 13.06473 |
| 14027 | ABC5G     | 2.892104 | 3.79239  | 1.888289 | 2.083774 | 0.044604  | 0.084536  | 0        | 1.094824 | 0        | 6.696381 | 8.556443 | 1.004979 |
| 13581 | LOC103241 | 3.245532 | 3.79223  | 1.812391 | 2.092391 | 0.036404  | 0.071261  | 0        | 0        | 1.391463 | 2.232127 | 12.83466 | 3.014938 |
| 14247 | FAM205C   | 3.089456 | 3.792124 | 1.926644 | 1.968253 | 0.049039  | 0.091495  | 0.542086 | 0        | 0.695731 | 4.464254 | 12.83466 | 0        |
| 14249 | ANKS4B    | 3.089456 | 3.792124 | 1.926644 | 1.968253 | 0.049039  | 0.091495  | 0.542086 | 0        | 0.695731 | 4.464254 | 12.83466 | 0        |
| 10787 | LOC103231 | 4.62892  | 3.791141 | 1.418281 | 2.673053 | 0.007516  | 0.018525  | 0.542086 | 0        | 1.391463 | 13.39276 | 6.417332 | 6.029877 |
| 8395  | ITIH1     | 7.890842 | 3.7909   | 1.154681 | 3.283071 | 0.001027  | 0.003252  | 0        | 0.547412 | 2.782925 | 17.85702 | 17.11289 | 9.044815 |
| 6918  | LOC119621 | 10.76744 | 3.790194 | 1.005914 | 3.767911 | 0.000165  | 0.000633  | 0        | 1.642235 | 2.782925 | 22.32127 | 27.80844 | 10.04979 |
| 13669 | HRH2      | 54.40638 | 3.789318 | 1.826324 | 2.074834 | 0.038002  | 0.07391   | 0        | 0.547412 | 21.56767 | 100.4457 | 147.5986 | 56.27885 |
| 15746 | LOC119611 | 35.91648 | 3.788414 | 2.217105 | 1.708721 | 0.087503  | 0.147736  | 0        | 0        | 14.61036 | 69.19594 | 100.5382 | 31.15436 |
| 7312  | SLC5A5    | 11.16738 | 3.787956 | 1.043225 | 3.631007 | 0.000282  | 0.001026  | 0        | 0.547412 | 4.174388 | 24.5534  | 25.66933 | 12.05975 |
| 9     | EDIL3     | 4725.541 | 3.787756 | 0.100004 | 37.87598 | 0         | 0         | 591.9583 | 695.7604 | 626.854  | 8720.92  | 8505.104 | 9212.647 |
| 10920 | CPA1      | 6.372904 | 3.787345 | 1.430848 | 2.646924 | 0.008123  | 0.019775  | 0        | 0.547412 | 2.087194 | 8.928508 | 25.66933 | 1.004979 |
| 12108 | RAI2      | 4.52715  | 3.787176 | 1.588404 | 2.384265 | 0.017113  | 0.037566  | 0        | 1.094824 | 0.695731 | 20.08914 | 4.278221 | 1.004979 |
| 6760  | F13A1     | 12.58868 | 3.786504 | 0.988212 | 3.831672 | 0.000127  | 0.000501  | 0        | 1.094824 | 4.174388 | 37.94616 | 19.252   | 13.06473 |
| 13381 | LOC119621 | 3.053316 | 3.786323 | 1.777029 | 2.130704 | 0.033114  | 0.065789  | 0        | 0.547412 | 0.695731 | 2.232127 | 12.83466 | 2.009959 |
| 1099  | LOC103221 | 78.89075 | 3.785868 | 0.359657 | 10.52632 | 6.53E-26  | 1.58E-24  | 6.505036 | 13.13788 | 12.52316 | 154.0168 | 145.4595 | 141.7021 |
| 9129  | CTLA4     | 8.077036 | 3.785799 | 1.232045 | 3.072776 | 0.002121  | 0.006176  | 0        | 0        | 3.478657 | 20.08914 | 12.83466 | 12.05975 |
| 5973  | LOC103241 | 12.28015 | 3.785426 | 0.906464 | 4.176037 | 2.97E-05  | 0.000132  | 1.084173 | 0.547412 | 3.478657 | 24.5534  | 29.94755 | 14.06971 |
| 3592  | LOC103241 | 30.76172 | 3.784813 | 0.6578   | 5.753744 | 8.73E-09  | 6.46E-08  | 1.084173 | 3.284471 | 8.348776 | 66.96381 | 72.72976 | 32.15934 |
| 11826 | VSTM1     | 4.89608  | 3.781494 | 1.547976 | 2.442864 | 0.014571  | 0.032756  | 0        | 0        | 2.087194 | 17.85702 | 6.417332 | 3.014938 |
| 6237  | CALHM3    | 10.20966 | 3.779741 | 0.931415 | 4.058064 | 4.95E-05  | 0.000211  | 0.542086 | 1.642235 | 2.087194 | 15.62489 | 19.252   | 22.10955 |
| 11718 | LOC103221 | 4.880577 | 3.778396 | 1.531804 | 2.466632 | 0.013639  | 0.030943  | 0        | 0        | 2.087194 | 15.62489 | 8.556443 | 3.014938 |
| 7706  | ADGRF1    | 9.287163 | 3.777259 | 1.08182  | 3.491579 | 0.00048   | 0.001657  | 0        | 1.094824 | 2.782925 | 24.5534  | 19.252   | 8.039836 |
| 3466  | RXR2      | 55.12309 | 3.775246 | 0.640764 | 5.89179  | 3.82E-09  | 2.93E-08  | 1.084173 | 3.831883 | 18.08902 | 98.21359 | 141.1813 | 68.3386  |
| 7278  | PRCD      | 9.077669 | 3.774797 | 1.036887 | 3.64051  | 0.000272  | 0.000994  | 1.084173 | 0.547412 | 2.087194 | 22.32127 | 21.39111 | 7.034856 |
| 12090 | GFRA2     | 46.30028 | 3.774368 | 1.579778 | 2.389176 | 0.016886  | 0.037131  | 0        | 1.642235 | 17.39328 | 75.89232 | 132.6249 | 50.24897 |
| 9521  | STAR      | 7.487449 | 3.773968 | 1.266948 | 2.978786 | 0.002894  | 0.008081  | 0        | 1.642235 | 1.391463 | 8.928508 | 29.94755 | 3.014938 |
| 10962 | STRA8     | 4.422088 | 3.773919 | 1.431293 | 2.636721 | 0.008371  | 0.020302  | 0        | 1.094824 | 0.695731 | 11.16063 | 8.556443 | 5.024897 |
| 11399 | LOC119611 | 4.317027 | 3.773563 | 1.487501 | 2.536847 | 0.011186  | 0.026087  | 0        | 1.094824 | 0.695731 | 2.232127 | 12.83466 | 9.044815 |
| 6213  | LOC103211 | 15.74633 | 3.772952 | 0.927565 | 4.067589 | 4.75E-05  | 0.000203  | 0.542086 | 0.547412 | 5.565851 | 24.5534  | 49.19955 | 14.06971 |
| 9368  | LOC119611 | 7.977997 | 3.772559 | 1.251593 | 3.014206 | 0.002577  | 0.007312  | 0        | 0        | 3.478657 | 8.928508 | 21.39111 | 14.06971 |
| 11907 | LOC103231 | 4.140313 | 3.77169  | 1.556335 | 2.423443 | 0.015374  | 0.034326  | 0        | 1.642235 | 0        | 4.464254 | 10.69555 | 8.039836 |
| 6193  | ELFN1     | 15.37698 | 3.770479 | 0.924858 | 4.076821 | 4.57E-05  | 0.000196  | 0.542086 | 1.642235 | 4.174388 | 44.64254 | 34.22577 | 7.034856 |
| 9223  | CCDC73    | 8.868267 | 3.7684   | 1.235856 | 3.049222 | 0.002294  | 0.006613  | 0        | 2.189647 | 1.391463 | 13.39276 | 34.22577 | 2.009959 |
| 5431  | MYO1H     | 16.31215 | 3.768376 | 0.847562 | 4.446138 | 8.74E-06  | 4.28E-05  | 2.168345 | 1.642235 | 2.782925 | 46.87467 | 36.36488 | 8.039836 |
| 9258  | CDH5      | 5.936569 | 3.76794  | 1.238926 | 3.041296 | 0.002356  | 0.006764  | 0        | 1.094824 | 1.391463 | 13.39276 | 10.69555 | 9.044815 |
| 11083 | LOC103221 | 4.391083 | 3.766152 | 1.443202 | 2.60958  | 0.009065  | 0.021746  | 0        | 1.094824 | 0.695731 | 6.696381 | 12.83466 | 5.024897 |
| 46    | VEPH1     | 1203.356 | 3.765886 | 0.123743 | 30.43316 | 2.00E-203 | 1.16E-200 | 165.3363 | 181.7407 | 146.1036 | 2191.949 | 2305.961 | 2229.044 |
| 17899 | LOC119621 | 1.60404  | 3.765697 | 2.766013 | 1.361417 | 0.173382  | 0.25752   | 0        | 0        | 0.695731 | 8.928508 | 0        | 0        |
| 16260 | LOC103241 | 47.17917 | 3        |          |          |           |           |          |          |          |          |          |          |



|       |           |          |          |          |          |          |          |          |          |          |          |          |          |
|-------|-----------|----------|----------|----------|----------|----------|----------|----------|----------|----------|----------|----------|----------|
| 11235 | MLNR      | 4.212594 | 3.761561 | 1.461526 | 2.573721 | 0.010061 | 0.023808 | 1.084173 | 0.547412 | 0        | 8.928508 | 10.69555 | 4.019918 |
| 7180  | FGF14     | 10.14146 | 3.761532 | 1.024562 | 3.671357 | 0.000241 | 0.000893 | 0        | 2.737059 | 1.391463 | 17.85702 | 27.80844 | 11.05477 |
| 16735 | LOC103231 | 1.529984 | 3.759956 | 2.446927 | 1.536603 | 0.12439  | 0.197605 | 0        | 0        | 0.695731 | 4.464254 | 0        | 4.019918 |
| 16780 | LOC103234 | 1.505264 | 3.759708 | 2.459033 | 1.528937 | 0.12628  | 0.200069 | 0        | 0.547412 | 0        | 4.464254 | 0        | 4.019918 |
| 12044 | SPEGNB    | 4.343687 | 3.758907 | 1.567555 | 2.397942 | 0.016487 | 0.036393 | 0.542086 | 0.547412 | 0.695731 | 0        | 19.252   | 5.024897 |
| 7457  | PLA2G4D   | 10.89482 | 3.757334 | 1.04974  | 3.579302 | 0.000345 | 0.001228 | 0        | 0.547412 | 4.174388 | 15.62489 | 29.94755 | 15.07469 |
| 5374  | TCEAL7    | 16.708   | 3.757114 | 0.839048 | 4.477829 | 7.54E-06 | 3.73E-05 | 1.084173 | 1.094824 | 4.87012  | 26.78552 | 51.33866 | 15.07469 |
| 6113  | LOC103241 | 11.94196 | 3.756574 | 0.913253 | 4.1134   | 3.90E-05 | 0.00017  | 1.084173 | 1.094824 | 2.782925 | 24.5534  | 32.08666 | 10.04979 |
| 9907  | LOC119618 | 6.193362 | 3.755841 | 1.302712 | 2.883095 | 0.003938 | 0.010567 | 0        | 0.547412 | 2.087194 | 13.39276 | 17.11289 | 4.019918 |
| 5842  | IYD       | 11.69119 | 3.755794 | 0.883161 | 4.252672 | 2.11E-05 | 9.61E-05 | 1.084173 | 1.642235 | 2.087194 | 22.32127 | 29.94755 | 13.06473 |
| 4664  | DPEP1     | 17.90776 | 3.755357 | 0.765028 | 4.908781 | 9.16E-07 | 5.22E-06 | 1.084173 | 1.094824 | 5.565851 | 35.71403 | 27.80844 | 36.17926 |
| 16821 | BMP15     | 1.542292 | 3.754901 | 2.467843 | 1.521532 | 0.128126 | 0.02499  | 0        | 0.547412 | 0        | 6.696381 | 0        | 2.009959 |
| 16781 | LOC119620 | 1.567012 | 3.754647 | 2.45622  | 1.528628 | 0.126357 | 0.200166 | 0        | 0        | 0.695731 | 6.696381 | 0        | 2.009959 |
| 16782 | LOC103221 | 1.567012 | 3.754647 | 2.45622  | 1.528628 | 0.126357 | 0.200166 | 0        | 0        | 0.695731 | 6.696381 | 0        | 2.009959 |
| 10286 | ST6GALNA  | 6.037286 | 3.754354 | 1.344846 | 2.791662 | 0.005244 | 0.013552 | 0.542086 | 0.547412 | 1.391463 | 15.62489 | 17.11289 | 1.004979 |
| 7816  | LOC103238 | 7.278584 | 3.75434  | 1.084593 | 3.461519 | 0.000537 | 0.001827 | 1.084173 | 0.547412 | 1.391463 | 15.62489 | 14.97377 | 10.04979 |
| 7657  | PCARE     | 10.76718 | 3.753821 | 1.070117 | 3.507862 | 0.000452 | 0.001568 | 0        | 1.094824 | 3.478657 | 15.62489 | 36.36488 | 8.039836 |
| 10332 | NYX       | 6.34855  | 3.753145 | 1.349467 | 2.781206 | 0.005416 | 0.013935 | 0        | 0        | 2.782925 | 11.16063 | 17.11289 | 7.034856 |
| 16112 | CUNH6orf1 | 1.489761 | 3.752667 | 2.283812 | 1.643159 | 0.10035  | 0.165568 | 0        | 0.547412 | 0        | 2.232127 | 2.139111 | 4.019918 |
| 7535  | LOC103248 | 14.41956 | 3.752535 | 1.057809 | 3.547458 | 0.000389 | 0.001372 | 0        | 0        | 6.261582 | 33.4819  | 25.66933 | 21.10457 |
| 8946  | PRDM9     | 7.140674 | 3.750622 | 1.197158 | 3.132939 | 0.001731 | 0.005143 | 0        | 2.189647 | 0.695731 | 20.08914 | 12.83466 | 7.034856 |
| 7745  | GRIK1     | 10.86382 | 3.750549 | 1.077778 | 3.479892 | 0.000502 | 0.001722 | 0        | 0.547412 | 4.174388 | 11.16063 | 34.22577 | 15.07469 |
| 8808  | ENPP3     | 7.568157 | 3.749829 | 1.182168 | 3.171994 | 0.001514 | 0.00457  | 0        | 1.094824 | 2.087194 | 20.08914 | 17.11289 | 5.024897 |
| 8060  | LOC103237 | 14.54269 | 3.749803 | 1.104125 | 3.396176 | 0.000683 | 0.002254 | 0        | 0        | 6.261582 | 35.71403 | 34.22577 | 11.05477 |
| 10859 | SGS1L     | 6.422606 | 3.749646 | 1.410207 | 2.658933 | 0.007839 | 0.019191 | 0        | 0        | 2.782925 | 15.62489 | 17.11289 | 3.014938 |
| 10122 | LOC119618 | 6.162356 | 3.748949 | 1.323603 | 2.832382 | 0.00462  | 0.012135 | 0        | 0.547412 | 2.087194 | 8.928508 | 21.39111 | 4.019918 |
| 8051  | AQP2      | 9.135169 | 3.747464 | 1.102506 | 3.399041 | 0.000676 | 0.002233 | 0        | 1.094824 | 2.782925 | 26.78552 | 17.11289 | 7.034856 |
| 12543 | GPR119    | 4.787561 | 3.746773 | 1.632985 | 2.294432 | 0.021766 | 0.046133 | 0        | 0        | 2.087194 | 2.232127 | 21.39111 | 3.014938 |
| 8912  | IRX2      | 7.109668 | 3.744879 | 1.192234 | 3.141061 | 0.001683 | 0.005022 | 0        | 2.189647 | 0.695731 | 15.62489 | 17.11289 | 7.034856 |
| 9009  | LOC103248 | 7.712978 | 3.744418 | 1.202967 | 3.112654 | 0.001854 | 0.005471 | 0.542086 | 0        | 2.782925 | 13.39276 | 23.53022 | 6.029877 |
| 2221  | CCDC197   | 48.6896  | 3.744368 | 0.495063 | 7.563424 | 3.93E-14 | 4.70E-13 | 8.673382 | 2.189647 | 9.740239 | 100.4457 | 70.59065 | 100.4979 |
| 9017  | LOC103233 | 7.713866 | 3.742905 | 1.203072 | 3.111124 | 0.001864 | 0.005495 | 0        | 0.547412 | 2.782925 | 13.39276 | 23.53022 | 6.029877 |
| 5847  | ISL1      | 23.5728  | 3.740809 | 0.880201 | 4.249948 | 2.14E-05 | 9.72E-05 | 0        | 1.094824 | 9.044508 | 53.57105 | 55.61688 | 22.10955 |
| 17085 | MARCHF11  | 1.56293  | 3.740593 | 2.520994 | 1.483777 | 0.137868 | 0.214516 | 0.542086 | 0        | 0        | 6.696381 | 2.139111 | 0        |
| 17086 | LOC119620 | 1.56293  | 3.740593 | 2.520994 | 1.483777 | 0.137868 | 0.214516 | 0.542086 | 0        | 0        | 6.696381 | 2.139111 | 0        |
| 17079 | LOC119620 | 1.563817 | 3.740569 | 2.520583 | 1.484009 | 0.137806 | 0.214458 | 0        | 0.547412 | 0        | 6.696381 | 2.139111 | 0        |
| 17080 | PHOX2A    | 1.563817 | 3.740569 | 2.520583 | 1.484009 | 0.137806 | 0.214458 | 0        | 0.547412 | 0        | 6.696381 | 2.139111 | 0        |
| 17081 | LOC119620 | 1.563817 | 3.740569 | 2.520583 | 1.484009 | 0.137806 | 0.214458 | 0        | 0.547412 | 0        | 6.696381 | 2.139111 | 0        |
| 17082 | LOC103221 | 1.563817 | 3.740569 | 2.520583 | 1.484009 | 0.137806 | 0.214458 | 0        | 0.547412 | 0        | 6.696381 | 2.139111 | 0        |
| 17083 | LOC119621 | 1.563817 | 3.740569 | 2.520583 | 1.484009 | 0.137806 | 0.214458 | 0        | 0.547412 | 0        | 6.696381 | 2.139111 | 0        |
| 17014 | LOC103241 | 1.588537 | 3.739903 | 2.509277 | 1.49043  | 0.136111 | 0.212654 | 0        | 0        | 0.695731 | 6.696381 | 2.139111 | 0        |
| 17015 | LOC103241 | 1.588537 | 3.739903 | 2.509277 | 1.49043  | 0.136111 | 0.212654 | 0        | 0        | 0.695731 | 6.696381 | 2.139111 | 0        |
| 17016 | GSX2      | 1.588537 | 3.739903 | 2.509277 | 1.49043  | 0.136111 | 0.212654 | 0        | 0        | 0.695731 | 6.696381 | 2.139111 | 0        |
| 11654 | LRRC14B   | 6.428629 | 3.739495 | 1.507861 | 2.48     | 0.013138 | 0.029971 | 0        | 0        | 2.782925 | 13.39276 | 21.39111 | 1.004979 |
| 16090 | LOC119620 | 1.525902 | 3.738245 | 2.268295 | 1.648042 | 0.099344 | 0.164143 | 0.542086 | 0        | 0        | 4.464254 | 2.139111 | 2.009959 |
| 16055 | PYDC5     | 1.551509 | 3.737981 | 2.258301 | 1.655218 | 0.09788  | 0.162027 | 0        | 0        | 0.695731 | 4.464254 | 2.139111 | 2.009959 |
| 16056 | LOC103241 | 1.551509 | 3.737981 | 2.258301 | 1.655218 | 0.09788  | 0.162027 | 0        | 0        | 0.695731 | 4.464254 | 2.139111 | 2.009959 |
| 16057 | PROK2     | 1.551509 | 3.737981 | 2.258301 | 1.655218 | 0.09788  | 0.162027 | 0        | 0        | 0.695731 | 4.464254 | 2.139111 | 2.009959 |
| 16058 | ZFP57     | 1.551509 | 3.737981 | 2.258301 | 1.655218 | 0.09788  | 0.162027 | 0        | 0        | 0.695731 | 4.464254 | 2.139111 | 2.009959 |
| 16059 | PCP4      | 1.551509 | 3.737981 | 2.258301 | 1.655218 | 0.09788  | 0.162027 | 0        | 0        | 0.695731 | 4.464254 | 2.139111 | 2.009959 |
| 16060 | LOC119621 | 1.551509 | 3.737981 | 2.258301 | 1.655218 | 0.09788  | 0.162027 | 0        | 0        | 0.695731 | 4.464254 | 2.139111 | 2.009959 |
| 9912  | TMEM239   | 7.958613 | 3.73715  | 1.296961 | 2.881466 | 0.003958 | 0.010617 | 0        | 0        | 3.478657 | 17.85702 | 21.39111 | 5.024897 |
| 16834 | RBP2      | 1.498978 | 3.735935 | 2.459562 | 1.518943 | 0.128777 | 0.20337  | 0        | 0        | 0.695731 | 0        | 4.278221 | 4.019918 |
| 16870 | LOC119621 | 1.474259 | 3.735596 | 2.472051 | 1.511132 | 0.130755 | 0.206041 | 0        | 0.547412 | 0        | 0        | 4.278221 | 4.019918 |
| 16871 | LOC103235 | 1.474259 | 3.735596 | 2.472051 | 1.511132 | 0.130755 | 0.206041 | 0        | 0.547412 | 0        | 0        | 4.278221 | 4.019918 |
| 16872 | LOC119621 | 1.473371 | 3.735583 | 2.472505 | 1.51085  | 0.130827 | 0.206142 | 0.542086 | 0        | 0        | 0        | 4.278221 | 4.019918 |
| 6461  | BTX       | 13.56647 | 3.733969 | 0.944054 | 3.955251 | 7.65E-05 | 0.000315 | 0        | 1.642235 | 4.174388 | 35.71403 | 27.80844 | 12.05975 |
| 20516 | LOC119620 | 0.744042 | 3.733414 | 3.964294 | 0.94176  | 0.346315 | 0.447515 | 0        | 0        | 0        | 4.464254 | 0        | 0        |
| 20518 | LOC119618 | 0.744042 | 3.733414 | 3.964294 | 0.94176  | 0.346315 | 0.447515 | 0        | 0        | 0        | 4.464254 | 0        | 0        |
| 20520 | LOC103241 | 0.744042 | 3.733414 | 3.964294 | 0.94176  | 0.346315 | 0.447515 | 0        | 0        | 0        | 4.464254 | 0        | 0        |
| 20521 | LOC103221 | 0.744042 | 3.733414 | 3.964294 | 0.94176  | 0.346315 | 0.447515 | 0        | 0        | 0        | 4.464254 | 0        | 0        |
| 20522 | LOC103221 | 0.744042 | 3.733414 | 3.964294 | 0.94176  | 0.346315 | 0.447515 | 0        | 0        | 0        | 4.464254 | 0        | 0        |
| 20523 | LOC119624 | 0.744042 | 3.733414 | 3.964294 | 0.94176  | 0.346315 | 0.447515 | 0        | 0        | 0        | 4.464254 | 0        | 0        |
| 20524 | LOC103241 | 0.744042 | 3.733414 | 3.964294 | 0.94176  | 0.346315 | 0.447515 | 0        | 0        | 0        | 4.464254 | 0        | 0        |
| 20525 | LOC103231 | 0.744042 | 3.733414 | 3.964294 | 0.94176  | 0.346315 | 0.447515 | 0        | 0        | 0        | 4.464254 | 0        | 0        |
| 20526 | CAVIN3    | 0.744042 | 3.733414 | 3.964294 | 0.94176  | 0.346315 | 0.447515 | 0        | 0        | 0        | 4.464254 | 0        | 0        |
| 20527 | LOC119624 | 0.744042 | 3.733414 | 3.964294 | 0.94176  | 0.346315 | 0.447515 | 0        | 0        | 0        | 4.464254 | 0        | 0        |
| 20528 | LOC119624 | 0.744042 | 3.733414 | 3.964294 | 0.94176  | 0.346315 | 0.447515 | 0        | 0        | 0        | 4.464254 | 0        | 0        |
| 20529 | LOC119620 | 0.744042 | 3.733414 | 3.964294 | 0.94176  | 0.346315 | 0.447515 | 0        | 0        | 0        | 4.464254 | 0        | 0        |
| 20530 | LOC103241 | 0.744042 | 3.733414 | 3.964294 | 0.94176  | 0.346315 | 0.447515 | 0        | 0        | 0        | 4.464254 | 0        | 0        |
| 20531 | LOC103241 | 0.744042 | 3.733414 | 3.964294 | 0.94176  | 0.346315 | 0.447515 | 0        | 0        | 0        | 4.464254 | 0        | 0        |
| 20532 | LOC103221 | 0.744042 | 3.733414 | 3.964294 | 0.94176  | 0.346315 | 0.447515 | 0        | 0        | 0        | 4.464254 | 0        | 0        |
| 20533 | LOC103221 | 0.744042 | 3.733414 | 3.964294 | 0.94176  | 0.346315 | 0.447515 | 0        | 0        | 0        | 4.464254 | 0        | 0        |
| 20534 | LOC119621 | 0.744042 | 3.733414 | 3.964294 | 0.94176  | 0.346315 | 0.447515 | 0        | 0        | 0        | 4.464254 | 0        | 0        |



|       |           |          |          |          |          |          |          |          |          |          |          |          |          |
|-------|-----------|----------|----------|----------|----------|----------|----------|----------|----------|----------|----------|----------|----------|
| 20536 | LOC103246 | 0.744042 | 3.733414 | 3.964294 | 0.94176  | 0.346315 | 0.447515 | 0        | 0        | 0        | 4.464254 | 0        | 0        |
| 20538 | LOC119628 | 0.744042 | 3.733414 | 3.964294 | 0.94176  | 0.346315 | 0.447515 | 0        | 0        | 0        | 4.464254 | 0        | 0        |
| 20539 | LOC119618 | 0.744042 | 3.733414 | 3.964294 | 0.94176  | 0.346315 | 0.447515 | 0        | 0        | 0        | 4.464254 | 0        | 0        |
| 20541 | LOC119618 | 0.744042 | 3.733414 | 3.964294 | 0.94176  | 0.346315 | 0.447515 | 0        | 0        | 0        | 4.464254 | 0        | 0        |
| 20542 | LOC103247 | 0.744042 | 3.733414 | 3.964294 | 0.94176  | 0.346315 | 0.447515 | 0        | 0        | 0        | 4.464254 | 0        | 0        |
| 20543 | EBLN1     | 0.744042 | 3.733414 | 3.964294 | 0.94176  | 0.346315 | 0.447515 | 0        | 0        | 0        | 4.464254 | 0        | 0        |
| 20544 | LOC119619 | 0.744042 | 3.733414 | 3.964294 | 0.94176  | 0.346315 | 0.447515 | 0        | 0        | 0        | 4.464254 | 0        | 0        |
| 20545 | LOC119619 | 0.744042 | 3.733414 | 3.964294 | 0.94176  | 0.346315 | 0.447515 | 0        | 0        | 0        | 4.464254 | 0        | 0        |
| 20546 | LOC103219 | 0.744042 | 3.733414 | 3.964294 | 0.94176  | 0.346315 | 0.447515 | 0        | 0        | 0        | 4.464254 | 0        | 0        |
| 20547 | LOC119619 | 0.744042 | 3.733414 | 3.964294 | 0.94176  | 0.346315 | 0.447515 | 0        | 0        | 0        | 4.464254 | 0        | 0        |
| 20551 | LOC119619 | 0.744042 | 3.733414 | 3.964294 | 0.94176  | 0.346315 | 0.447515 | 0        | 0        | 0        | 4.464254 | 0        | 0        |
| 20552 | LOC119619 | 0.744042 | 3.733414 | 3.964294 | 0.94176  | 0.346315 | 0.447515 | 0        | 0        | 0        | 4.464254 | 0        | 0        |
| 20553 | LOC119620 | 0.744042 | 3.733414 | 3.964294 | 0.94176  | 0.346315 | 0.447515 | 0        | 0        | 0        | 4.464254 | 0        | 0        |
| 20554 | LOC119620 | 0.744042 | 3.733414 | 3.964294 | 0.94176  | 0.346315 | 0.447515 | 0        | 0        | 0        | 4.464254 | 0        | 0        |
| 20555 | RNASE12   | 0.744042 | 3.733414 | 3.964294 | 0.94176  | 0.346315 | 0.447515 | 0        | 0        | 0        | 4.464254 | 0        | 0        |
| 20556 | LOC103230 | 0.744042 | 3.733414 | 3.964294 | 0.94176  | 0.346315 | 0.447515 | 0        | 0        | 0        | 4.464254 | 0        | 0        |
| 20557 | LOC103230 | 0.744042 | 3.733414 | 3.964294 | 0.94176  | 0.346315 | 0.447515 | 0        | 0        | 0        | 4.464254 | 0        | 0        |
| 20559 | TEX13C    | 0.744042 | 3.733414 | 3.964294 | 0.94176  | 0.346315 | 0.447515 | 0        | 0        | 0        | 4.464254 | 0        | 0        |
| 20560 | ZCCHC13   | 0.744042 | 3.733414 | 3.964294 | 0.94176  | 0.346315 | 0.447515 | 0        | 0        | 0        | 4.464254 | 0        | 0        |
| 20561 | LOC119620 | 0.744042 | 3.733414 | 3.964294 | 0.94176  | 0.346315 | 0.447515 | 0        | 0        | 0        | 4.464254 | 0        | 0        |
| 20563 | LOC119620 | 0.744042 | 3.733414 | 3.964294 | 0.94176  | 0.346315 | 0.447515 | 0        | 0        | 0        | 4.464254 | 0        | 0        |
| 20564 | LOC119620 | 0.744042 | 3.733414 | 3.964294 | 0.94176  | 0.346315 | 0.447515 | 0        | 0        | 0        | 4.464254 | 0        | 0        |
| 20566 | LOC119620 | 0.744042 | 3.733414 | 3.964294 | 0.94176  | 0.346315 | 0.447515 | 0        | 0        | 0        | 4.464254 | 0        | 0        |
| 20570 | LOC119620 | 0.744042 | 3.733414 | 3.964294 | 0.94176  | 0.346315 | 0.447515 | 0        | 0        | 0        | 4.464254 | 0        | 0        |
| 20571 | LOC119620 | 0.744042 | 3.733414 | 3.964294 | 0.94176  | 0.346315 | 0.447515 | 0        | 0        | 0        | 4.464254 | 0        | 0        |
| 20572 | LOC119620 | 0.744042 | 3.733414 | 3.964294 | 0.94176  | 0.346315 | 0.447515 | 0        | 0        | 0        | 4.464254 | 0        | 0        |
| 20573 | LOC119620 | 0.744042 | 3.733414 | 3.964294 | 0.94176  | 0.346315 | 0.447515 | 0        | 0        | 0        | 4.464254 | 0        | 0        |
| 20574 | LOC119620 | 0.744042 | 3.733414 | 3.964294 | 0.94176  | 0.346315 | 0.447515 | 0        | 0        | 0        | 4.464254 | 0        | 0        |
| 8782  | LOC119618 | 9.377513 | 3.73162  | 1.173893 | 3.178843 | 0.001479 | 0.004476 | 0        | 0        | 4.174388 | 15.62489 | 21.39111 | 15.07469 |
| 12498 | AJAP1     | 29.14206 | 3.729351 | 1.619927 | 2.302173 | 0.021325 | 0.045362 | 0        | 0.547412 | 11.82743 | 71.42806 | 59.8951  | 31.15436 |
| 14421 | WT1       | 2.711675 | 3.728936 | 1.922415 | 1.939714 | 0.052414 | 0.096619 | 0.542086 | 0.547412 | 0        | 11.16063 | 0        | 4.019918 |
| 14959 | LOC119618 | 3.171052 | 3.727908 | 2.021978 | 1.843694 | 0.065228 | 0.115922 | 0        | 0        | 1.391463 | 15.62489 | 0        | 2.009959 |
| 16139 | LOC119619 | 1.510399 | 3.726773 | 2.273271 | 1.639388 | 0.101133 | 0.166591 | 0.542086 | 0        | 0        | 2.232127 | 4.278221 | 2.009959 |
| 16130 | LOC103220 | 1.511287 | 3.726765 | 2.272915 | 1.639641 | 0.10108  | 0.166522 | 0        | 0.547412 | 0        | 2.232127 | 4.278221 | 2.009959 |
| 16131 | LOC119624 | 1.511287 | 3.726765 | 2.272915 | 1.639641 | 0.10108  | 0.166522 | 0        | 0.547412 | 0        | 2.232127 | 4.278221 | 2.009959 |
| 16135 | SERPINB2  | 1.511287 | 3.726765 | 2.272915 | 1.639641 | 0.10108  | 0.166522 | 0        | 0.547412 | 0        | 2.232127 | 4.278221 | 2.009959 |
| 16096 | LOC103218 | 1.536006 | 3.726551 | 2.263123 | 1.64664  | 0.099632 | 0.164486 | 0        | 0        | 0.695731 | 2.232127 | 4.278221 | 2.009959 |
| 16097 | LOC119625 | 1.536006 | 3.726551 | 2.263123 | 1.64664  | 0.099632 | 0.164486 | 0        | 0        | 0.695731 | 2.232127 | 4.278221 | 2.009959 |
| 16098 | NMS       | 1.536006 | 3.726551 | 2.263123 | 1.64664  | 0.099632 | 0.164486 | 0        | 0        | 0.695731 | 2.232127 | 4.278221 | 2.009959 |
| 16100 | LOC119620 | 1.536006 | 3.726551 | 2.263123 | 1.64664  | 0.099632 | 0.164486 | 0        | 0        | 0.695731 | 2.232127 | 4.278221 | 2.009959 |
| 16101 | PGLYRP1   | 1.536006 | 3.726551 | 2.263123 | 1.64664  | 0.099632 | 0.164486 | 0        | 0        | 0.695731 | 2.232127 | 4.278221 | 2.009959 |
| 16102 | SPACA4    | 1.536006 | 3.726551 | 2.263123 | 1.64664  | 0.099632 | 0.164486 | 0        | 0        | 0.695731 | 2.232127 | 4.278221 | 2.009959 |
| 16103 | LOC103220 | 1.536006 | 3.726551 | 2.263123 | 1.64664  | 0.099632 | 0.164486 | 0        | 0        | 0.695731 | 2.232127 | 4.278221 | 2.009959 |
| 17010 | LOC103239 | 1.547427 | 3.726541 | 2.49978  | 1.490747 | 0.136028 | 0.212598 | 0.542086 | 0        | 0        | 4.464254 | 4.278221 | 0        |
| 17008 | OXGR1     | 1.548315 | 3.726517 | 2.499363 | 1.490987 | 0.135965 | 0.212525 | 0        | 0.547412 | 0        | 4.464254 | 4.278221 | 0        |
| 14271 | LOC119625 | 2.605726 | 3.726049 | 1.895123 | 1.966126 | 0.049284 | 0.09181  | 1.084173 | 0        | 0        | 2.232127 | 4.278221 | 8.039836 |
| 16961 | LOC119620 | 1.573034 | 3.725845 | 2.487892 | 1.497591 | 0.13424  | 0.21036  | 0        | 0        | 0.695731 | 4.464254 | 4.278221 | 0        |
| 16962 | PSAPL1    | 1.573034 | 3.725845 | 2.487892 | 1.497591 | 0.13424  | 0.21036  | 0        | 0        | 0.695731 | 4.464254 | 4.278221 | 0        |
| 16963 | LOC119619 | 1.573034 | 3.725845 | 2.487892 | 1.497591 | 0.13424  | 0.21036  | 0        | 0        | 0.695731 | 4.464254 | 4.278221 | 0        |
| 16964 | ZNF232    | 1.573034 | 3.725845 | 2.487892 | 1.497591 | 0.13424  | 0.21036  | 0        | 0        | 0.695731 | 4.464254 | 4.278221 | 0        |
| 16965 | LOC119618 | 1.573034 | 3.725845 | 2.487892 | 1.497591 | 0.13424  | 0.21036  | 0        | 0        | 0.695731 | 4.464254 | 4.278221 | 0        |
| 11710 | FGF23     | 4.654527 | 3.725005 | 1.508408 | 2.469494 | 0.01353  | 0.030718 | 0        | 0        | 2.087194 | 13.39276 | 6.417332 | 6.029877 |
| 1847  | LOC103218 | 51.37857 | 3.724532 | 0.447793 | 8.317527 | 8.98E-17 | 1.29E-15 | 4.336691 | 10.94824 | 6.261582 | 87.05295 | 111.2338 | 88.43819 |
| 15363 | LOC103220 | 2.755613 | 3.724354 | 2.108034 | 1.766743 | 0.077271 | 0.133706 | 0        | 1.094824 | 0        | 11.16063 | 4.278221 | 0        |
| 11211 | GRIN3A    | 7.986161 | 3.724287 | 1.443348 | 2.580311 | 0.009871 | 0.023408 | 0        | 0        | 3.478657 | 15.62489 | 27.80844 | 1.004979 |
| 4954  | SLC6A7    | 30.50869 | 3.722621 | 0.790056 | 4.711844 | 2.45E-06 | 1.32E-05 | 0        | 2.737059 | 10.43597 | 64.73168 | 77.00798 | 28.13943 |
| 11910 | CXCR1     | 4.691555 | 3.721855 | 1.536174 | 2.422807 | 0.015401 | 0.034378 | 0        | 0        | 2.087194 | 15.62489 | 6.417332 | 4.019918 |
| 13716 | UBD       | 3.034985 | 3.720034 | 1.800479 | 2.066136 | 0.038816 | 0.075197 | 0        | 0        | 1.391463 | 2.232127 | 8.556443 | 6.029877 |
| 6195  | LHX5      | 24.97488 | 3.719992 | 0.912684 | 4.075884 | 4.58E-05 | 0.000197 | 0        | 1.094824 | 9.740239 | 51.33892 | 70.59065 | 17.08465 |
| 13682 | LOC119619 | 3.124544 | 3.719728 | 1.795031 | 2.072237 | 0.038243 | 0.074304 | 0        | 0        | 1.391463 | 8.928508 | 6.417332 | 2.009959 |
| 13683 | LOC103220 | 3.124544 | 3.719728 | 1.795031 | 2.072237 | 0.038243 | 0.074304 | 0        | 0        | 1.391463 | 8.928508 | 6.417332 | 2.009959 |
| 13539 | LOC103220 | 3.072013 | 3.719385 | 1.770709 | 2.100506 | 0.035684 | 0.070059 | 0        | 0        | 1.391463 | 4.464254 | 8.556443 | 4.019918 |
| 13540 | HIGD1B    | 3.072013 | 3.719385 | 1.770709 | 2.100506 | 0.035684 | 0.070059 | 0        | 0        | 1.391463 | 4.464254 | 8.556443 | 4.019918 |
| 13541 | LOC119620 | 3.072013 | 3.719385 | 1.770709 | 2.100506 | 0.035684 | 0.070059 | 0        | 0        | 1.391463 | 4.464254 | 8.556443 | 4.019918 |
| 26813 | LOC119620 | 0.707014 | 3.718531 | 3.517506 | 1.05715  | 0.290443 | NA       | 0        | 0        | 0        | 2.232127 | 0        | 2.009959 |
| 27164 | LOC103230 | 0.707014 | 3.718531 | 3.517506 | 1.05715  | 0.290443 | NA       | 0        | 0        | 0        | 2.232127 | 0        | 2.009959 |
| 27423 | GP9       | 0.707014 | 3.718531 | 3.517506 | 1.05715  | 0.290443 | NA       | 0        | 0        | 0        | 2.232127 | 0        | 2.009959 |
| 27501 | LOC103220 | 0.707014 | 3.718531 | 3.517506 | 1.05715  | 0.290443 | NA       | 0        | 0        | 0        | 2.232127 | 0        | 2.009959 |
| 27689 | MYMX      | 0.707014 | 3.718531 | 3.517506 | 1.05715  | 0.290443 | NA       | 0        | 0        | 0        | 2.232127 | 0        | 2.009959 |
| 27811 | LOC119620 | 0.707014 | 3.718531 | 3.517506 | 1.05715  | 0.290443 | NA       | 0        | 0        | 0        | 2.232127 | 0        | 2.009959 |
| 27873 | LOC119620 | 0.707014 | 3.718531 | 3.517506 | 1.05715  | 0.290443 | NA       | 0        | 0        | 0        | 2.232127 | 0        | 2.009959 |
| 27968 | LOC119628 | 0.707014 | 3.718531 | 3.517506 | 1.05715  | 0.290443 | NA       | 0        | 0        | 0        | 2.232127 | 0        | 2.009959 |
| 28004 | LOC103220 | 0.707014 | 3.718531 | 3.517506 | 1.05715  | 0.290443 | NA       | 0        | 0        | 0        | 2.232127 | 0        | 2.009959 |
| 28012 | LOC103224 | 0.707014 | 3.718531 | 3.517506 | 1.05715  | 0.290443 | NA       | 0        | 0        | 0        | 2.232127 | 0        | 2.009959 |



|       |           |          |          |          |          |          |          |          |          |          |          |          |          |
|-------|-----------|----------|----------|----------|----------|----------|----------|----------|----------|----------|----------|----------|----------|
| 28135 | PTF1A     | 0.707014 | 3.718531 | 3.517506 | 1.05715  | 0.290443 | NA       | 0        | 0        | 0        | 2.232127 | 0        | 2.009959 |
| 28286 | LOC103225 | 0.707014 | 3.718531 | 3.517506 | 1.05715  | 0.290443 | NA       | 0        | 0        | 0        | 2.232127 | 0        | 2.009959 |
| 28679 | LOC103215 | 0.707014 | 3.718531 | 3.517506 | 1.05715  | 0.290443 | NA       | 0        | 0        | 0        | 2.232127 | 0        | 2.009959 |
| 28838 | LOC103218 | 0.707014 | 3.718531 | 3.517506 | 1.05715  | 0.290443 | NA       | 0        | 0        | 0        | 2.232127 | 0        | 2.009959 |
| 29058 | LOC103243 | 0.707014 | 3.718531 | 3.517506 | 1.05715  | 0.290443 | NA       | 0        | 0        | 0        | 2.232127 | 0        | 2.009959 |
| 29128 | LOC119627 | 0.707014 | 3.718531 | 3.517506 | 1.05715  | 0.290443 | NA       | 0        | 0        | 0        | 2.232127 | 0        | 2.009959 |
| 29138 | LOC103233 | 0.707014 | 3.718531 | 3.517506 | 1.05715  | 0.290443 | NA       | 0        | 0        | 0        | 2.232127 | 0        | 2.009959 |
| 29158 | PRR27     | 0.707014 | 3.718531 | 3.517506 | 1.05715  | 0.290443 | NA       | 0        | 0        | 0        | 2.232127 | 0        | 2.009959 |
| 29208 | LOC103225 | 0.707014 | 3.718531 | 3.517506 | 1.05715  | 0.290443 | NA       | 0        | 0        | 0        | 2.232127 | 0        | 2.009959 |
| 29357 | LOC103225 | 0.707014 | 3.718531 | 3.517506 | 1.05715  | 0.290443 | NA       | 0        | 0        | 0        | 2.232127 | 0        | 2.009959 |
| 16926 | LOC119626 | 1.520504 | 3.718063 | 2.474358 | 1.502637 | 0.132933 | 0.208792 | 0        | 0        | 0.695731 | 0        | 6.417332 | 2.009959 |
| 13387 | LOC119618 | 2.841881 | 3.71666  | 1.745217 | 2.129626 | 0.033202 | 0.065926 | 0.542086 | 0        | 0.695731 | 2.232127 | 8.556443 | 5.024897 |
| 8956  | CCDC60    | 7.571352 | 3.716554 | 1.187573 | 3.129537 | 0.001751 | 0.005197 | 0        | 0.547412 | 2.782925 | 20.08914 | 14.97377 | 7.034856 |
| 15333 | LOC103247 | 2.722833 | 3.716324 | 2.095871 | 1.773164 | 0.076201 | 0.132127 | 1.084173 | 0        | 0        | 6.696381 | 8.556443 | 0        |
| 11247 | LOC103230 | 4.233066 | 3.715952 | 1.445417 | 2.570851 | 0.010145 | 0.02398  | 0        | 1.094824 | 0.695731 | 11.16063 | 6.417332 | 6.029877 |
| 14749 | KLHL33    | 16.20571 | 3.715551 | 1.974985 | 1.881306 | 0.05993  | 0.108024 | 0        | 0        | 6.957314 | 29.01765 | 49.19955 | 12.05975 |
| 17208 | LOC103225 | 1.531924 | 3.71549  | 2.533032 | 1.466815 | 0.142426 | 0.219999 | 0.542086 | 0        | 0        | 2.232127 | 6.417332 | 0        |
| 17209 | LOC103225 | 1.531924 | 3.71549  | 2.533032 | 1.466815 | 0.142426 | 0.219999 | 0.542086 | 0        | 0        | 2.232127 | 6.417332 | 0        |
| 17210 | LOC119626 | 1.531924 | 3.71549  | 2.533032 | 1.466815 | 0.142426 | 0.219999 | 0.542086 | 0        | 0        | 2.232127 | 6.417332 | 0        |
| 17205 | LOC103235 | 1.532812 | 3.715468 | 2.532609 | 1.467052 | 0.142362 | 0.219951 | 0        | 0.547412 | 0        | 2.232127 | 6.417332 | 0        |
| 17206 | SLAMF1    | 1.532812 | 3.715468 | 2.532609 | 1.467052 | 0.142362 | 0.219951 | 0        | 0.547412 | 0        | 2.232127 | 6.417332 | 0        |
| 17207 | LOC119627 | 1.532812 | 3.715468 | 2.532609 | 1.467052 | 0.142362 | 0.219951 | 0        | 0.547412 | 0        | 2.232127 | 6.417332 | 0        |
| 5130  | HCN4      | 29.09209 | 3.715444 | 0.8053   | 4.613738 | 3.95E-06 | 2.05E-05 | 0.542086 | 1.642235 | 10.43597 | 66.96381 | 74.86887 | 20.09959 |
| 7084  | AGBL1     | 10.34006 | 3.71544  | 1.003707 | 3.701717 | 0.000214 | 0.000804 | 0        | 1.094824 | 3.478657 | 17.85702 | 23.53022 | 16.07967 |
| 5177  | CLVS1     | 16.00895 | 3.715002 | 0.809199 | 4.590964 | 4.41E-06 | 2.27E-05 | 2.168345 | 0.547412 | 4.174388 | 35.71403 | 36.36488 | 17.08465 |
| 17144 | NEUROG1   | 1.557532 | 3.714851 | 2.52096  | 1.473585 | 0.140593 | 0.217915 | 0        | 0        | 0.695731 | 2.232127 | 6.417332 | 0        |
| 17145 | LOC119624 | 1.557532 | 3.714851 | 2.52096  | 1.473585 | 0.140593 | 0.217915 | 0        | 0        | 0.695731 | 2.232127 | 6.417332 | 0        |
| 17146 | LOC103225 | 1.557532 | 3.714851 | 2.52096  | 1.473585 | 0.140593 | 0.217915 | 0        | 0        | 0.695731 | 2.232127 | 6.417332 | 0        |
| 17147 | SLC22A1   | 1.557532 | 3.714851 | 2.52096  | 1.473585 | 0.140593 | 0.217915 | 0        | 0        | 0.695731 | 2.232127 | 6.417332 | 0        |
| 17148 | LOC119625 | 1.557532 | 3.714851 | 2.52096  | 1.473585 | 0.140593 | 0.217915 | 0        | 0        | 0.695731 | 2.232127 | 6.417332 | 0        |
| 17149 | RNF113B   | 1.557532 | 3.714851 | 2.52096  | 1.473585 | 0.140593 | 0.217915 | 0        | 0        | 0.695731 | 2.232127 | 6.417332 | 0        |
| 17150 | CCDC172   | 1.557532 | 3.714851 | 2.52096  | 1.473585 | 0.140593 | 0.217915 | 0        | 0        | 0.695731 | 2.232127 | 6.417332 | 0        |
| 17151 | HDX36     | 1.557532 | 3.714851 | 2.52096  | 1.473585 | 0.140593 | 0.217915 | 0        | 0        | 0.695731 | 2.232127 | 6.417332 | 0        |
| 7190  | TESD17B6  | 8.449743 | 3.714675 | 1.012391 | 3.66921  | 0.000243 | 0.0009   | 0.542086 | 1.642235 | 1.391463 | 20.08914 | 14.97377 | 12.05975 |
| 11374 | BTN1A1    | 4.467446 | 3.713661 | 1.460343 | 2.543006 | 0.01099  | 0.025688 | 0.542086 | 0        | 1.391463 | 11.16063 | 10.69555 | 3.014938 |
| 13705 | LOC103225 | 3.109041 | 3.713486 | 1.796272 | 2.06733  | 0.038703 | 0.075071 | 0        | 0        | 1.391463 | 6.696381 | 8.556443 | 2.009959 |
| 13706 | LOC119627 | 3.109041 | 3.713486 | 1.796272 | 2.06733  | 0.038703 | 0.075071 | 0        | 0        | 1.391463 | 6.696381 | 8.556443 | 2.009959 |
| 13397 | SLCO1B3   | 2.842768 | 3.713356 | 1.744881 | 2.128143 | 0.033325 | 0.066131 | 0        | 0.547412 | 0.695731 | 2.232127 | 8.556443 | 5.024897 |
| 12220 | ASCL2     | 4.697578 | 3.711084 | 1.570866 | 2.362445 | 0.018155 | 0.039496 | 0        | 0        | 2.087194 | 13.39276 | 10.69555 | 2.009959 |
| 11024 | LRRRC25   | 4.269207 | 3.710831 | 1.413923 | 2.624494 | 0.008678 | 0.02093  | 0.542086 | 0.547412 | 0.695731 | 13.39276 | 6.417332 | 4.019918 |
| 6674  | LOC103233 | 11.56569 | 3.710577 | 0.959393 | 3.867632 | 0.00011  | 0.000438 | 0        | 2.189647 | 2.782925 | 24.5534  | 27.80844 | 12.05975 |
| 6566  | TREML2    | 15.01418 | 3.709604 | 0.947771 | 3.91403  | 9.08E-05 | 0.000368 | 0.542086 | 1.094824 | 4.87012  | 40.17829 | 36.36488 | 7.034856 |
| 8064  | LOC103225 | 8.884136 | 3.709419 | 1.09248  | 3.395411 | 0.000685 | 0.002259 | 0        | 1.094824 | 2.782925 | 17.85702 | 23.53022 | 8.039836 |
| 13836 | AMBN      | 3.05651  | 3.709201 | 1.815939 | 2.042581 | 0.041094 | 0.078959 | 0        | 0        | 1.391463 | 2.232127 | 10.69555 | 4.019918 |
| 13626 | LOC119618 | 2.628139 | 3.708665 | 1.7798   | 2.083754 | 0.037183 | 0.072545 | 0.542086 | 0.547412 | 0        | 2.232127 | 6.417332 | 6.029877 |
| 7239  | CYP4F3    | 10.1909  | 3.708512 | 1.014505 | 3.655487 | 0.000257 | 0.000943 | 0        | 1.642235 | 2.782925 | 17.85702 | 27.80844 | 11.05477 |
| 13314 | LOC119627 | 2.878909 | 3.708218 | 1.72929  | 2.144358 | 0.032004 | 0.063905 | 0.542086 | 0        | 0.695731 | 4.464254 | 8.556443 | 3.014938 |
| 5518  | LOC103233 | 24.37105 | 3.707604 | 0.841837 | 4.404184 | 1.06E-05 | 5.11E-05 | 0        | 1.642235 | 9.044508 | 55.80317 | 55.61688 | 24.11951 |
| 11381 | LOC119615 | 4.254592 | 3.707088 | 1.458389 | 2.541907 | 0.011025 | 0.025754 | 0        | 1.094824 | 0.695731 | 11.16063 | 8.556443 | 4.019918 |
| 11450 | LOC119624 | 4.4003   | 3.706392 | 1.467012 | 2.52649  | 0.011521 | 0.02675  | 0        | 0.547412 | 1.391463 | 4.464254 | 14.97377 | 5.024897 |
| 13839 | RTP2      | 3.093538 | 3.706231 | 1.815269 | 2.041698 | 0.041181 | 0.079105 | 0        | 0        | 1.391463 | 4.464254 | 10.69555 | 2.009959 |
| 10948 | AGBL4     | 4.253704 | 3.705963 | 1.403997 | 2.63958  | 0.008301 | 0.020157 | 0.542086 | 0.547412 | 0.695731 | 11.16063 | 8.556443 | 4.019918 |
| 396   | PPP1R32   | 193.5744 | 3.705235 | 0.235442 | 15.73735 | 8.39E-56 | 5.63E-54 | 29.27266 | 21.34906 | 32.69937 | 350.4439 | 350.8141 | 376.8673 |
| 13327 | ASB9      | 2.879796 | 3.704982 | 1.728951 | 2.142907 | 0.032121 | 0.064072 | 0        | 0.547412 | 0.695731 | 4.464254 | 8.556443 | 3.014938 |
| 9644  | SIGLEC11  | 7.695535 | 3.704266 | 1.256097 | 2.949028 | 0.003188 | 0.008787 | 0        | 0        | 3.478657 | 13.39276 | 19.252   | 10.04979 |
| 231   | TMEM140   | 355.6085 | 3.703983 | 0.19498  | 18.99675 | 1.81E-80 | 2.09E-78 | 52.04029 | 42.69812 | 58.44144 | 640.6204 | 586.1163 | 753.7346 |
| 7023  | TTC22     | 11.73293 | 3.70375  | 0.994074 | 3.725828 | 0.000195 | 0.000737 | 0        | 1.642235 | 3.478657 | 17.85702 | 36.36488 | 11.05477 |
| 11481 | ATP2C2    | 4.186558 | 3.703559 | 1.469097 | 2.520976 | 0.011703 | 0.027099 | 0        | 1.094824 | 0.695731 | 4.464254 | 12.83466 | 6.029877 |
| 9700  | GJC3      | 7.583397 | 3.702783 | 1.264041 | 2.929321 | 0.003397 | 0.00931  | 0        | 0.547412 | 2.782925 | 15.62489 | 23.53022 | 3.014938 |
| 13586 | LOC103230 | 2.863406 | 3.702326 | 1.769858 | 2.091877 | 0.03645  | 0.071322 | 0.542086 | 0        | 0.695731 | 2.232127 | 10.69555 | 3.014938 |
| 11791 | LOC119627 | 4.258839 | 3.702134 | 1.510137 | 2.451523 | 0.014225 | 0.032074 | 1.084173 | 0        | 0.695731 | 8.928508 | 12.83466 | 2.009959 |
| 12301 | LOC103218 | 4.666573 | 3.701999 | 1.579253 | 2.344146 | 0.019071 | 0.041216 | 0        | 0        | 2.087194 | 8.928508 | 14.97377 | 2.009959 |
| 5372  | TMIE      | 12.63259 | 3.701669 | 0.826317 | 4.479721 | 7.47E-06 | 3.70E-05 | 1.084173 | 1.642235 | 2.782925 | 26.78552 | 21.39111 | 22.10955 |
| 11756 | GCSAM     | 4.420938 | 3.700679 | 1.50577  | 2.457666 | 0.013984 | 0.031624 | 0.542086 | 0        | 1.391463 | 4.464254 | 17.11289 | 3.014938 |
| 14046 | MMP20     | 2.666055 | 3.699932 | 1.844746 | 2.005659 | 0.044893 | 0.084969 | 0        | 1.094824 | 0        | 4.464254 | 6.417332 | 4.019918 |
| 9778  | CPNE6     | 7.567894 | 3.699848 | 1.271774 | 2.909202 | 0.003624 | 0.009852 | 0        | 0.547412 | 2.782925 | 13.39276 | 25.66933 | 3.014938 |
| 11840 | IL23R     | 4.171056 | 3.699613 | 1.51684  | 2.439026 | 0.014727 | 0.033067 | 0        | 1.094824 | 0.695731 | 2.232127 | 14.97377 | 6.029877 |
| 13593 | LOC103236 | 2.864294 | 3.698961 | 1.769516 | 2.09038  | 0.036584 | 0.071534 | 0        | 0.547412 | 0.695731 | 2.232127 | 10.69555 | 3.014938 |
| 13595 | REM1      | 2.864294 | 3.698961 | 1.769516 | 2.09038  | 0.036584 | 0.071534 | 0        | 0.547412 | 0.695731 | 2.232127 | 10.69555 | 3.014938 |
| 13596 | LOC103228 | 2.864294 | 3.698961 | 1.769516 | 2.09038  | 0.036584 | 0.071534 | 0        | 0.547412 | 0.695731 | 2.232127 | 10.69555 | 3.014938 |
| 10340 | A4GNT     | 5.728587 | 3.698954 | 1.330902 | 2.779283 | 0.005448 | 0.014007 | 0        | 1.094824 | 1.391463 | 4.464254 | 21.39111 | 6.029877 |
| 6679  | LOC103238 | 16.83301 | 3.698458 | 0.956705 | 3.685829 | 0.000111 | 0.000441 | 0.542086 | 0        | 6.957314 | 40.17829 | 34.22577 | 19.09461 |
| 9556  | FMR1NB    | 7.478336 | 3.697446 | 1.244426 | 2.971207 | 0.002966 | 0.008252 | 0        | 0.547412 | 2.782925 | 6.696381 | 27.80844 | 7.034856 |
| 14154 | LOC119615 | 3.078035 | 3.697235 | 1.862713 | 1.984865 | 0.047159 | 0.088572 | 0        | 0        | 1.391463 | 2.232127 | 12.83466 | 2.009959 |



|       |           |          |          |          |          |          |          |   |          |          |          |          |          |
|-------|-----------|----------|----------|----------|----------|----------|----------|---|----------|----------|----------|----------|----------|
| 14115 | GNG13     | 3.078035 | 3.697235 | 1.862713 | 1.984865 | 0.047159 | 0.088572 | 0 | 0        | 1.391463 | 2.232127 | 12.83466 | 2.009959 |
| 14199 | LOC10324  | 2.703083 | 3.695499 | 1.869156 | 1.977095 | 0.048031 | 0.089929 | 0 | 1.094824 | 0        | 6.696381 | 6.417332 | 2.009959 |
| 19835 | NROB2     | 0.72854  | 3.695342 | 3.535464 | 1.045221 | 0.295921 | 0.395012 | 0 | 0        | 0        | 2.232127 | 2.139111 | 0        |
| 19836 | LOC11962  | 0.72854  | 3.695342 | 3.535464 | 1.045221 | 0.295921 | 0.395012 | 0 | 0        | 0        | 2.232127 | 2.139111 | 0        |
| 19837 | LOC11962  | 0.72854  | 3.695342 | 3.535464 | 1.045221 | 0.295921 | 0.395012 | 0 | 0        | 0        | 2.232127 | 2.139111 | 0        |
| 19838 | HMH81     | 0.72854  | 3.695342 | 3.535464 | 1.045221 | 0.295921 | 0.395012 | 0 | 0        | 0        | 2.232127 | 2.139111 | 0        |
| 19839 | LOC10321  | 0.72854  | 3.695342 | 3.535464 | 1.045221 | 0.295921 | 0.395012 | 0 | 0        | 0        | 2.232127 | 2.139111 | 0        |
| 19842 | LOC11962  | 0.72854  | 3.695342 | 3.535464 | 1.045221 | 0.295921 | 0.395012 | 0 | 0        | 0        | 2.232127 | 2.139111 | 0        |
| 19844 | LOC10323  | 0.72854  | 3.695342 | 3.535464 | 1.045221 | 0.295921 | 0.395012 | 0 | 0        | 0        | 2.232127 | 2.139111 | 0        |
| 19845 | LOC11962  | 0.72854  | 3.695342 | 3.535464 | 1.045221 | 0.295921 | 0.395012 | 0 | 0        | 0        | 2.232127 | 2.139111 | 0        |
| 19846 | LOC10323  | 0.72854  | 3.695342 | 3.535464 | 1.045221 | 0.295921 | 0.395012 | 0 | 0        | 0        | 2.232127 | 2.139111 | 0        |
| 19847 | LOC11962  | 0.72854  | 3.695342 | 3.535464 | 1.045221 | 0.295921 | 0.395012 | 0 | 0        | 0        | 2.232127 | 2.139111 | 0        |
| 19848 | LOC11962  | 0.72854  | 3.695342 | 3.535464 | 1.045221 | 0.295921 | 0.395012 | 0 | 0        | 0        | 2.232127 | 2.139111 | 0        |
| 19849 | LOC11962  | 0.72854  | 3.695342 | 3.535464 | 1.045221 | 0.295921 | 0.395012 | 0 | 0        | 0        | 2.232127 | 2.139111 | 0        |
| 19851 | IFITM5    | 0.72854  | 3.695342 | 3.535464 | 1.045221 | 0.295921 | 0.395012 | 0 | 0        | 0        | 2.232127 | 2.139111 | 0        |
| 19852 | MS4A12    | 0.72854  | 3.695342 | 3.535464 | 1.045221 | 0.295921 | 0.395012 | 0 | 0        | 0        | 2.232127 | 2.139111 | 0        |
| 19853 | LOC10324  | 0.72854  | 3.695342 | 3.535464 | 1.045221 | 0.295921 | 0.395012 | 0 | 0        | 0        | 2.232127 | 2.139111 | 0        |
| 19854 | LOC10323  | 0.72854  | 3.695342 | 3.535464 | 1.045221 | 0.295921 | 0.395012 | 0 | 0        | 0        | 2.232127 | 2.139111 | 0        |
| 19855 | LOC10323  | 0.72854  | 3.695342 | 3.535464 | 1.045221 | 0.295921 | 0.395012 | 0 | 0        | 0        | 2.232127 | 2.139111 | 0        |
| 19856 | LOC11962  | 0.72854  | 3.695342 | 3.535464 | 1.045221 | 0.295921 | 0.395012 | 0 | 0        | 0        | 2.232127 | 2.139111 | 0        |
| 19857 | LOC11962  | 0.72854  | 3.695342 | 3.535464 | 1.045221 | 0.295921 | 0.395012 | 0 | 0        | 0        | 2.232127 | 2.139111 | 0        |
| 19858 | LOC11962  | 0.72854  | 3.695342 | 3.535464 | 1.045221 | 0.295921 | 0.395012 | 0 | 0        | 0        | 2.232127 | 2.139111 | 0        |
| 19860 | LOC11962  | 0.72854  | 3.695342 | 3.535464 | 1.045221 | 0.295921 | 0.395012 | 0 | 0        | 0        | 2.232127 | 2.139111 | 0        |
| 19863 | LOC11962  | 0.72854  | 3.695342 | 3.535464 | 1.045221 | 0.295921 | 0.395012 | 0 | 0        | 0        | 2.232127 | 2.139111 | 0        |
| 19864 | IQCF2     | 0.72854  | 3.695342 | 3.535464 | 1.045221 | 0.295921 | 0.395012 | 0 | 0        | 0        | 2.232127 | 2.139111 | 0        |
| 19865 | LOC11962  | 0.72854  | 3.695342 | 3.535464 | 1.045221 | 0.295921 | 0.395012 | 0 | 0        | 0        | 2.232127 | 2.139111 | 0        |
| 19866 | LOC11962  | 0.72854  | 3.695342 | 3.535464 | 1.045221 | 0.295921 | 0.395012 | 0 | 0        | 0        | 2.232127 | 2.139111 | 0        |
| 19867 | LOC10324  | 0.72854  | 3.695342 | 3.535464 | 1.045221 | 0.295921 | 0.395012 | 0 | 0        | 0        | 2.232127 | 2.139111 | 0        |
| 19868 | LOC10324  | 0.72854  | 3.695342 | 3.535464 | 1.045221 | 0.295921 | 0.395012 | 0 | 0        | 0        | 2.232127 | 2.139111 | 0        |
| 19869 | LOC10324  | 0.72854  | 3.695342 | 3.535464 | 1.045221 | 0.295921 | 0.395012 | 0 | 0        | 0        | 2.232127 | 2.139111 | 0        |
| 19870 | LOC11962  | 0.72854  | 3.695342 | 3.535464 | 1.045221 | 0.295921 | 0.395012 | 0 | 0        | 0        | 2.232127 | 2.139111 | 0        |
| 19871 | LOC10323  | 0.72854  | 3.695342 | 3.535464 | 1.045221 | 0.295921 | 0.395012 | 0 | 0        | 0        | 2.232127 | 2.139111 | 0        |
| 19873 | LOC10321  | 0.72854  | 3.695342 | 3.535464 | 1.045221 | 0.295921 | 0.395012 | 0 | 0        | 0        | 2.232127 | 2.139111 | 0        |
| 19874 | LOC11962  | 0.72854  | 3.695342 | 3.535464 | 1.045221 | 0.295921 | 0.395012 | 0 | 0        | 0        | 2.232127 | 2.139111 | 0        |
| 19876 | LOC11961  | 0.72854  | 3.695342 | 3.535464 | 1.045221 | 0.295921 | 0.395012 | 0 | 0        | 0        | 2.232127 | 2.139111 | 0        |
| 19877 | LOC11961  | 0.72854  | 3.695342 | 3.535464 | 1.045221 | 0.295921 | 0.395012 | 0 | 0        | 0        | 2.232127 | 2.139111 | 0        |
| 19878 | BHLHE23   | 0.72854  | 3.695342 | 3.535464 | 1.045221 | 0.295921 | 0.395012 | 0 | 0        | 0        | 2.232127 | 2.139111 | 0        |
| 19879 | LOC11961  | 0.72854  | 3.695342 | 3.535464 | 1.045221 | 0.295921 | 0.395012 | 0 | 0        | 0        | 2.232127 | 2.139111 | 0        |
| 19880 | TMEM271   | 0.72854  | 3.695342 | 3.535464 | 1.045221 | 0.295921 | 0.395012 | 0 | 0        | 0        | 2.232127 | 2.139111 | 0        |
| 19881 | LOC10323  | 0.72854  | 3.695342 | 3.535464 | 1.045221 | 0.295921 | 0.395012 | 0 | 0        | 0        | 2.232127 | 2.139111 | 0        |
| 19883 | LOC11961  | 0.72854  | 3.695342 | 3.535464 | 1.045221 | 0.295921 | 0.395012 | 0 | 0        | 0        | 2.232127 | 2.139111 | 0        |
| 19884 | LOC11961  | 0.72854  | 3.695342 | 3.535464 | 1.045221 | 0.295921 | 0.395012 | 0 | 0        | 0        | 2.232127 | 2.139111 | 0        |
| 19885 | LOC11961  | 0.72854  | 3.695342 | 3.535464 | 1.045221 | 0.295921 | 0.395012 | 0 | 0        | 0        | 2.232127 | 2.139111 | 0        |
| 19887 | LOC11961  | 0.72854  | 3.695342 | 3.535464 | 1.045221 | 0.295921 | 0.395012 | 0 | 0        | 0        | 2.232127 | 2.139111 | 0        |
| 19888 | LOC10323  | 0.72854  | 3.695342 | 3.535464 | 1.045221 | 0.295921 | 0.395012 | 0 | 0        | 0        | 2.232127 | 2.139111 | 0        |
| 19889 | LOC11961  | 0.72854  | 3.695342 | 3.535464 | 1.045221 | 0.295921 | 0.395012 | 0 | 0        | 0        | 2.232127 | 2.139111 | 0        |
| 19890 | LOC10323  | 0.72854  | 3.695342 | 3.535464 | 1.045221 | 0.295921 | 0.395012 | 0 | 0        | 0        | 2.232127 | 2.139111 | 0        |
| 19891 | LOC11962  | 0.72854  | 3.695342 | 3.535464 | 1.045221 | 0.295921 | 0.395012 | 0 | 0        | 0        | 2.232127 | 2.139111 | 0        |
| 19892 | LOC11962  | 0.72854  | 3.695342 | 3.535464 | 1.045221 | 0.295921 | 0.395012 | 0 | 0        | 0        | 2.232127 | 2.139111 | 0        |
| 19894 | LOC10323  | 0.72854  | 3.695342 | 3.535464 | 1.045221 | 0.295921 | 0.395012 | 0 | 0        | 0        | 2.232127 | 2.139111 | 0        |
| 19895 | LOC10324  | 0.72854  | 3.695342 | 3.535464 | 1.045221 | 0.295921 | 0.395012 | 0 | 0        | 0        | 2.232127 | 2.139111 | 0        |
| 19896 | LOC11962  | 0.72854  | 3.695342 | 3.535464 | 1.045221 | 0.295921 | 0.395012 | 0 | 0        | 0        | 2.232127 | 2.139111 | 0        |
| 19897 | LOC11962  | 0.72854  | 3.695342 | 3.535464 | 1.045221 | 0.295921 | 0.395012 | 0 | 0        | 0        | 2.232127 | 2.139111 | 0        |
| 19898 | LOC11962  | 0.72854  | 3.695342 | 3.535464 | 1.045221 | 0.295921 | 0.395012 | 0 | 0        | 0        | 2.232127 | 2.139111 | 0        |
| 19899 | LOC10324  | 0.72854  | 3.695342 | 3.535464 | 1.045221 | 0.295921 | 0.395012 | 0 | 0        | 0        | 2.232127 | 2.139111 | 0        |
| 19900 | LOC11962  | 0.72854  | 3.695342 | 3.535464 | 1.045221 | 0.295921 | 0.395012 | 0 | 0        | 0        | 2.232127 | 2.139111 | 0        |
| 19901 | LOC10323  | 0.72854  | 3.695342 | 3.535464 | 1.045221 | 0.295921 | 0.395012 | 0 | 0        | 0        | 2.232127 | 2.139111 | 0        |
| 19902 | CPXCR1    | 0.72854  | 3.695342 | 3.535464 | 1.045221 | 0.295921 | 0.395012 | 0 | 0        | 0        | 2.232127 | 2.139111 | 0        |
| 19903 | LOC11962  | 0.72854  | 3.695342 | 3.535464 | 1.045221 | 0.295921 | 0.395012 | 0 | 0        | 0        | 2.232127 | 2.139111 | 0        |
| 19904 | KRTAP13-1 | 0.72854  | 3.695342 | 3.535464 | 1.045221 | 0.295921 | 0.395012 | 0 | 0        | 0        | 2.232127 | 2.139111 | 0        |
| 19905 | LOC11962  | 0.72854  | 3.695342 | 3.535464 | 1.045221 | 0.295921 | 0.395012 | 0 | 0        | 0        | 2.232127 | 2.139111 | 0        |
| 19906 | LOC10323  | 0.72854  | 3.695342 | 3.535464 | 1.045221 | 0.295921 | 0.395012 | 0 | 0        | 0        | 2.232127 | 2.139111 | 0        |
| 19908 | LOC11962  | 0.72854  | 3.695342 | 3.535464 | 1.045221 | 0.295921 | 0.395012 | 0 | 0        | 0        | 2.232127 | 2.139111 | 0        |
| 19909 | LOC10324  | 0.72854  | 3.695342 | 3.535464 | 1.045221 | 0.295921 | 0.395012 | 0 | 0        | 0        | 2.232127 | 2.139111 | 0        |
| 19911 | LOC10323  | 0.72854  | 3.695342 | 3.535464 | 1.045221 | 0.295921 | 0.395012 | 0 | 0        | 0        | 2.232127 | 2.139111 | 0        |
| 19912 | TAS2R13   | 0.72854  | 3.695342 | 3.535464 | 1.045221 | 0.295921 | 0.395012 | 0 | 0        | 0        | 2.232127 | 2.139111 | 0        |
| 19913 | LOC10324  | 0.72854  | 3.695342 | 3.535464 | 1.045221 | 0.295921 | 0.395012 | 0 | 0        | 0        | 2.232127 | 2.139111 | 0        |
| 19914 | LOC11962  | 0.72854  | 3.695342 | 3.535464 | 1.045221 | 0.295921 | 0.395012 | 0 | 0        | 0        | 2.232127 | 2.139111 | 0        |
| 19915 | LOC11962  | 0.72854  | 3.695342 | 3.535464 | 1.045221 | 0.295921 | 0.395012 | 0 | 0        | 0        | 2.232127 | 2.139111 | 0        |
| 19916 | LOC11962  | 0.72854  | 3.695342 | 3.535464 | 1.045221 | 0.295921 | 0.395012 | 0 | 0        | 0        | 2.232127 | 2.139111 | 0        |
| 26979 | LOC10321  | 0.669986 | 3.695061 | 4.01694  | 0.91987  | 0.357641 | NA       | 0 | 0        | 0        | 0        | 0        | 4.019918 |
| 27036 | OOSP4B    | 0.669986 | 3.695061 | 4.01694  | 0.91987  | 0.357641 | NA       | 0 | 0        | 0        | 0        | 0        | 4.019918 |
| 27120 | SLURP1    | 0.669986 | 3.695061 | 4.01694  | 0.91987  | 0.357641 | NA       | 0 | 0        | 0        | 0        | 0        | 4.019918 |
| 27489 | LOC10322  | 0.669986 | 3.695061 | 4.01694  | 0.91987  | 0.357641 | NA       | 0 | 0        | 0        | 0        | 0        | 4.019918 |



|       |           |          |          |          |          |           |           |          |          |          |          |          |          |
|-------|-----------|----------|----------|----------|----------|-----------|-----------|----------|----------|----------|----------|----------|----------|
| 27922 | LOC119621 | 0.669986 | 3.695061 | 4.01694  | 0.91987  | 0.357641  | NA        | 0        | 0        | 0        | 0        | 0        | 4.019918 |
| 28304 | ACTRT2    | 0.669986 | 3.695061 | 4.01694  | 0.91987  | 0.357641  | NA        | 0        | 0        | 0        | 0        | 0        | 4.019918 |
| 28898 | LOC119621 | 0.669986 | 3.695061 | 4.01694  | 0.91987  | 0.357641  | NA        | 0        | 0        | 0        | 0        | 0        | 4.019918 |
| 26809 | LOC119621 | 0.691512 | 3.693318 | 3.545337 | 1.041739 | 0.297533  | NA        | 0        | 0        | 0        | 0        | 2.139111 | 2.009959 |
| 26838 | LOC119624 | 0.691512 | 3.693318 | 3.545337 | 1.041739 | 0.297533  | NA        | 0        | 0        | 0        | 0        | 2.139111 | 2.009959 |
| 27047 | GLYAT     | 0.691512 | 3.693318 | 3.545337 | 1.041739 | 0.297533  | NA        | 0        | 0        | 0        | 0        | 2.139111 | 2.009959 |
| 27212 | LOC119621 | 0.691512 | 3.693318 | 3.545337 | 1.041739 | 0.297533  | NA        | 0        | 0        | 0        | 0        | 2.139111 | 2.009959 |
| 27270 | LOC119621 | 0.691512 | 3.693318 | 3.545337 | 1.041739 | 0.297533  | NA        | 0        | 0        | 0        | 0        | 2.139111 | 2.009959 |
| 27474 | PAX4      | 0.691512 | 3.693318 | 3.545337 | 1.041739 | 0.297533  | NA        | 0        | 0        | 0        | 0        | 2.139111 | 2.009959 |
| 27589 | LOC103241 | 0.691512 | 3.693318 | 3.545337 | 1.041739 | 0.297533  | NA        | 0        | 0        | 0        | 0        | 2.139111 | 2.009959 |
| 27700 | ZIM2      | 0.691512 | 3.693318 | 3.545337 | 1.041739 | 0.297533  | NA        | 0        | 0        | 0        | 0        | 2.139111 | 2.009959 |
| 27799 | CUNH22or  | 0.691512 | 3.693318 | 3.545337 | 1.041739 | 0.297533  | NA        | 0        | 0        | 0        | 0        | 2.139111 | 2.009959 |
| 27853 | LOC119621 | 0.691512 | 3.693318 | 3.545337 | 1.041739 | 0.297533  | NA        | 0        | 0        | 0        | 0        | 2.139111 | 2.009959 |
| 28203 | LOC119611 | 0.691512 | 3.693318 | 3.545337 | 1.041739 | 0.297533  | NA        | 0        | 0        | 0        | 0        | 2.139111 | 2.009959 |
| 28218 | TRNAA-AG  | 0.691512 | 3.693318 | 3.545337 | 1.041739 | 0.297533  | NA        | 0        | 0        | 0        | 0        | 2.139111 | 2.009959 |
| 28269 | LOC119611 | 0.691512 | 3.693318 | 3.545337 | 1.041739 | 0.297533  | NA        | 0        | 0        | 0        | 0        | 2.139111 | 2.009959 |
| 28278 | S100B     | 0.691512 | 3.693318 | 3.545337 | 1.041739 | 0.297533  | NA        | 0        | 0        | 0        | 0        | 2.139111 | 2.009959 |
| 28303 | LOC119611 | 0.691512 | 3.693318 | 3.545337 | 1.041739 | 0.297533  | NA        | 0        | 0        | 0        | 0        | 2.139111 | 2.009959 |
| 28415 | LOC103231 | 0.691512 | 3.693318 | 3.545337 | 1.041739 | 0.297533  | NA        | 0        | 0        | 0        | 0        | 2.139111 | 2.009959 |
| 28462 | LOC103231 | 0.691512 | 3.693318 | 3.545337 | 1.041739 | 0.297533  | NA        | 0        | 0        | 0        | 0        | 2.139111 | 2.009959 |
| 28548 | LOC119621 | 0.691512 | 3.693318 | 3.545337 | 1.041739 | 0.297533  | NA        | 0        | 0        | 0        | 0        | 2.139111 | 2.009959 |
| 28600 | LOC103231 | 0.691512 | 3.693318 | 3.545337 | 1.041739 | 0.297533  | NA        | 0        | 0        | 0        | 0        | 2.139111 | 2.009959 |
| 28643 | LOC103211 | 0.691512 | 3.693318 | 3.545337 | 1.041739 | 0.297533  | NA        | 0        | 0        | 0        | 0        | 2.139111 | 2.009959 |
| 28665 | LOC119621 | 0.691512 | 3.693318 | 3.545337 | 1.041739 | 0.297533  | NA        | 0        | 0        | 0        | 0        | 2.139111 | 2.009959 |
| 28831 | ART4      | 0.691512 | 3.693318 | 3.545337 | 1.041739 | 0.297533  | NA        | 0        | 0        | 0        | 0        | 2.139111 | 2.009959 |
| 28843 | LOC119621 | 0.691512 | 3.693318 | 3.545337 | 1.041739 | 0.297533  | NA        | 0        | 0        | 0        | 0        | 2.139111 | 2.009959 |
| 28858 | KRTAP7-1  | 0.691512 | 3.693318 | 3.545337 | 1.041739 | 0.297533  | NA        | 0        | 0        | 0        | 0        | 2.139111 | 2.009959 |
| 29126 | LOC103241 | 0.691512 | 3.693318 | 3.545337 | 1.041739 | 0.297533  | NA        | 0        | 0        | 0        | 0        | 2.139111 | 2.009959 |
| 29199 | LOC103241 | 0.691512 | 3.693318 | 3.545337 | 1.041739 | 0.297533  | NA        | 0        | 0        | 0        | 0        | 2.139111 | 2.009959 |
| 13785 | LOC119621 | 2.901322 | 3.692932 | 1.802249 | 2.049069 | 0.040455  | 0.07802   | 0        | 0.547412 | 0.695731 | 4.464254 | 10.69555 | 1.004979 |
| 9909  | LOC103214 | 9.348648 | 3.692304 | 1.28082  | 2.882766 | 0.003942  | 0.010575  | 0        | 0        | 4.174388 | 20.08914 | 27.80844 | 4.019918 |
| 9910  | TRIM72    | 9.348648 | 3.692304 | 1.28082  | 2.882766 | 0.003942  | 0.010575  | 0        | 0        | 4.174388 | 20.08914 | 27.80844 | 4.019918 |
| 5805  | ASTN1     | 12.8799  | 3.690088 | 0.864015 | 4.270862 | 1.95E-05  | 8.92E-05  | 1.084173 | 1.094824 | 3.478657 | 22.32127 | 34.22577 | 15.07469 |
| 14073 | ENAM      | 2.885819 | 3.687973 | 1.844866 | 1.999047 | 0.045603  | 0.086148  | 0        | 0.547412 | 0.695731 | 2.232127 | 12.83466 | 1.004979 |
| 6746  | KCNA2     | 9.853505 | 3.687233 | 0.960399 | 3.839271 | 0.000123  | 0.000486  | 1.626259 | 0.547412 | 2.087194 | 24.5534  | 19.252   | 11.05477 |
| 8882  | LOC119621 | 14.06173 | 3.687016 | 1.171078 | 3.148396 | 0.001642  | 0.004915  | 0        | 0        | 6.261582 | 35.71403 | 36.36488 | 6.029877 |
| 3458  | FER1L4    | 45.09969 | 3.68633  | 0.625201 | 5.896236 | 3.72E-09  | 2.86E-08  | 4.336691 | 2.189647 | 13.2189  | 93.74933 | 121.9293 | 35.17428 |
| 8843  | LOC119621 | 9.290676 | 3.686088 | 1.167149 | 3.158198 | 0.001587  | 0.004772  | 0.542086 | 3.284471 | 0        | 20.08914 | 27.80844 | 4.019918 |
| 7075  | PROP1     | 15.1769  | 3.685563 | 0.995096 | 3.703726 | 0.000212  | 0.000798  | 0        | 0.547412 | 6.261582 | 44.64254 | 23.53022 | 16.07967 |
| 7149  | RNF222    | 13.41244 | 3.685298 | 1.001178 | 3.680962 | 0.000232  | 0.000864  | 1.084173 | 0        | 4.87012  | 31.24978 | 34.22577 | 9.044815 |
| 8195  | FAM151A   | 8.864918 | 3.684348 | 1.100491 | 3.347913 | 0.000814  | 0.002641  | 0.542086 | 0        | 3.478657 | 17.85702 | 19.252   | 12.05975 |
| 8779  | LOC103234 | 6.936681 | 3.682804 | 1.158244 | 3.179644 | 0.001475  | 0.004465  | 1.626259 | 0        | 1.391463 | 17.85702 | 10.69555 | 10.04979 |
| 7874  | ARHGEF16  | 10.09479 | 3.682623 | 1.068322 | 3.447109 | 0.000567  | 0.001913  | 1.626259 | 0        | 2.782925 | 22.32127 | 27.80844 | 6.029877 |
| 6451  | LOC119621 | 12.32566 | 3.681697 | 0.929826 | 3.959553 | 7.51E-05  | 0.000309  | 0.542086 | 3.284471 | 1.391463 | 22.32127 | 36.36488 | 10.04979 |
| 116   | RASGEF1B  | 692.9708 | 3.68165  | 0.155202 | 23.72167 | 2.15E-124 | 4.94E-122 | 81.31296 | 112.7668 | 107.1426 | 1330.348 | 1210.737 | 1315.518 |
| 26598 | LOC119621 | 0.713037 | 3.680016 | 4.018067 | 0.915867 | 0.359737  | NA        | 0        | 0        | 0        | 0        | 4.278221 | 0        |
| 26625 | LOC119624 | 0.713037 | 3.680016 | 4.018067 | 0.915867 | 0.359737  | NA        | 0        | 0        | 0        | 0        | 4.278221 | 0        |
| 26648 | LOC119621 | 0.713037 | 3.680016 | 4.018067 | 0.915867 | 0.359737  | NA        | 0        | 0        | 0        | 0        | 4.278221 | 0        |
| 26672 | LOC119611 | 0.713037 | 3.680016 | 4.018067 | 0.915867 | 0.359737  | NA        | 0        | 0        | 0        | 0        | 4.278221 | 0        |
| 26685 | CUNH5orf4 | 0.713037 | 3.680016 | 4.018067 | 0.915867 | 0.359737  | NA        | 0        | 0        | 0        | 0        | 4.278221 | 0        |
| 26756 | LOC119624 | 0.713037 | 3.680016 | 4.018067 | 0.915867 | 0.359737  | NA        | 0        | 0        | 0        | 0        | 4.278221 | 0        |
| 26775 | LOC119624 | 0.713037 | 3.680016 | 4.018067 | 0.915867 | 0.359737  | NA        | 0        | 0        | 0        | 0        | 4.278221 | 0        |
| 26841 | LOC119624 | 0.713037 | 3.680016 | 4.018067 | 0.915867 | 0.359737  | NA        | 0        | 0        | 0        | 0        | 4.278221 | 0        |
| 26844 | LOC119624 | 0.713037 | 3.680016 | 4.018067 | 0.915867 | 0.359737  | NA        | 0        | 0        | 0        | 0        | 4.278221 | 0        |
| 26868 | LOC119621 | 0.713037 | 3.680016 | 4.018067 | 0.915867 | 0.359737  | NA        | 0        | 0        | 0        | 0        | 4.278221 | 0        |
| 26881 | LOC103231 | 0.713037 | 3.680016 | 4.018067 | 0.915867 | 0.359737  | NA        | 0        | 0        | 0        | 0        | 4.278221 | 0        |
| 26911 | FCER1A    | 0.713037 | 3.680016 | 4.018067 | 0.915867 | 0.359737  | NA        | 0        | 0        | 0        | 0        | 4.278221 | 0        |
| 26920 | LOC103221 | 0.713037 | 3.680016 | 4.018067 | 0.915867 | 0.359737  | NA        | 0        | 0        | 0        | 0        | 4.278221 | 0        |
| 26921 | LOC103221 | 0.713037 | 3.680016 | 4.018067 | 0.915867 | 0.359737  | NA        | 0        | 0        | 0        | 0        | 4.278221 | 0        |
| 26964 | LOC119624 | 0.713037 | 3.680016 | 4.018067 | 0.915867 | 0.359737  | NA        | 0        | 0        | 0        | 0        | 4.278221 | 0        |
| 27074 | LOC103231 | 0.713037 | 3.680016 | 4.018067 | 0.915867 | 0.359737  | NA        | 0        | 0        | 0        | 0        | 4.278221 | 0        |
| 27093 | LOC103241 | 0.713037 | 3.680016 | 4.018067 | 0.915867 | 0.359737  | NA        | 0        | 0        | 0        | 0        | 4.278221 | 0        |
| 27111 | LOC103241 | 0.713037 | 3.680016 | 4.018067 | 0.915867 | 0.359737  | NA        | 0        | 0        | 0        | 0        | 4.278221 | 0        |
| 27150 | FABP9     | 0.713037 | 3.680016 | 4.018067 | 0.915867 | 0.359737  | NA        | 0        | 0        | 0        | 0        | 4.278221 | 0        |
| 27178 | PPDPFL    | 0.713037 | 3.680016 | 4.018067 | 0.915867 | 0.359737  | NA        | 0        | 0        | 0        | 0        | 4.278221 | 0        |
| 27191 | TAAR5     | 0.713037 | 3.680016 | 4.018067 | 0.915867 | 0.359737  | NA        | 0        | 0        | 0        | 0        | 4.278221 | 0        |
| 27199 | LOC119621 | 0.713037 | 3.680016 | 4.018067 | 0.915867 | 0.359737  | NA        | 0        | 0        | 0        | 0        | 4.278221 | 0        |
| 27267 | LOC119621 | 0.713037 | 3.680016 | 4.018067 | 0.915867 | 0.359737  | NA        | 0        | 0        | 0        | 0        | 4.278221 | 0        |
| 27278 | LOC119621 | 0.713037 | 3.680016 | 4.018067 | 0.915867 | 0.359737  | NA        | 0        | 0        | 0        | 0        | 4.278221 | 0        |
| 27352 | LOC119621 | 0.713037 | 3.680016 | 4.018067 | 0.915867 | 0.359737  | NA        | 0        | 0        | 0        | 0        | 4.278221 | 0        |
| 27361 | LOC119621 | 0.713037 | 3.680016 | 4.018067 | 0.915867 | 0.359737  | NA        | 0        | 0        | 0        | 0        | 4.278221 | 0        |
| 27464 | LYG1      | 0.713037 | 3.680016 | 4.018067 | 0.915867 | 0.359737  | NA        | 0        | 0        | 0        | 0        | 4.278221 | 0        |
| 27516 | LOC119621 | 0.713037 | 3.680016 | 4.018067 | 0.915867 | 0.359737  | NA        | 0        | 0        | 0        | 0        | 4.278221 | 0        |
| 27543 | LOC103241 | 0.713037 | 3.680016 | 4.018067 | 0.915867 | 0.359737  | NA        | 0        | 0        | 0        | 0        | 4.278221 | 0        |



|       |           |          |          |          |          |          |          |          |          |          |          |          |          |
|-------|-----------|----------|----------|----------|----------|----------|----------|----------|----------|----------|----------|----------|----------|
| 27582 | LOC103241 | 0.713037 | 3.680016 | 4.018067 | 0.915867 | 0.359737 | NA       | 0        | 0        | 0        | 0        | 4.278221 | 0        |
| 27583 | LOC103241 | 0.713037 | 3.680016 | 4.018067 | 0.915867 | 0.359737 | NA       | 0        | 0        | 0        | 0        | 4.278221 | 0        |
| 27616 | LOC119621 | 0.713037 | 3.680016 | 4.018067 | 0.915867 | 0.359737 | NA       | 0        | 0        | 0        | 0        | 4.278221 | 0        |
| 27635 | TRNAV-CA  | 0.713037 | 3.680016 | 4.018067 | 0.915867 | 0.359737 | NA       | 0        | 0        | 0        | 0        | 4.278221 | 0        |
| 27688 | LOC119621 | 0.713037 | 3.680016 | 4.018067 | 0.915867 | 0.359737 | NA       | 0        | 0        | 0        | 0        | 4.278221 | 0        |
| 27705 | LOC119621 | 0.713037 | 3.680016 | 4.018067 | 0.915867 | 0.359737 | NA       | 0        | 0        | 0        | 0        | 4.278221 | 0        |
| 27768 | LOC119621 | 0.713037 | 3.680016 | 4.018067 | 0.915867 | 0.359737 | NA       | 0        | 0        | 0        | 0        | 4.278221 | 0        |
| 27920 | LOC119621 | 0.713037 | 3.680016 | 4.018067 | 0.915867 | 0.359737 | NA       | 0        | 0        | 0        | 0        | 4.278221 | 0        |
| 27934 | LIPF      | 0.713037 | 3.680016 | 4.018067 | 0.915867 | 0.359737 | NA       | 0        | 0        | 0        | 0        | 4.278221 | 0        |
| 27936 | CH25H     | 0.713037 | 3.680016 | 4.018067 | 0.915867 | 0.359737 | NA       | 0        | 0        | 0        | 0        | 4.278221 | 0        |
| 28043 | LOC119611 | 0.713037 | 3.680016 | 4.018067 | 0.915867 | 0.359737 | NA       | 0        | 0        | 0        | 0        | 4.278221 | 0        |
| 28066 | MTRNR2L   | 0.713037 | 3.680016 | 4.018067 | 0.915867 | 0.359737 | NA       | 0        | 0        | 0        | 0        | 4.278221 | 0        |
| 28086 | LOC103241 | 0.713037 | 3.680016 | 4.018067 | 0.915867 | 0.359737 | NA       | 0        | 0        | 0        | 0        | 4.278221 | 0        |
| 28155 | LOC119611 | 0.713037 | 3.680016 | 4.018067 | 0.915867 | 0.359737 | NA       | 0        | 0        | 0        | 0        | 4.278221 | 0        |
| 28156 | LOC119611 | 0.713037 | 3.680016 | 4.018067 | 0.915867 | 0.359737 | NA       | 0        | 0        | 0        | 0        | 4.278221 | 0        |
| 28284 | LOC119611 | 0.713037 | 3.680016 | 4.018067 | 0.915867 | 0.359737 | NA       | 0        | 0        | 0        | 0        | 4.278221 | 0        |
| 28285 | LOC103221 | 0.713037 | 3.680016 | 4.018067 | 0.915867 | 0.359737 | NA       | 0        | 0        | 0        | 0        | 4.278221 | 0        |
| 28374 | LOC119611 | 0.713037 | 3.680016 | 4.018067 | 0.915867 | 0.359737 | NA       | 0        | 0        | 0        | 0        | 4.278221 | 0        |
| 28388 | LOC103231 | 0.713037 | 3.680016 | 4.018067 | 0.915867 | 0.359737 | NA       | 0        | 0        | 0        | 0        | 4.278221 | 0        |
| 28390 | LOC103231 | 0.713037 | 3.680016 | 4.018067 | 0.915867 | 0.359737 | NA       | 0        | 0        | 0        | 0        | 4.278221 | 0        |
| 28409 | LOC119611 | 0.713037 | 3.680016 | 4.018067 | 0.915867 | 0.359737 | NA       | 0        | 0        | 0        | 0        | 4.278221 | 0        |
| 28457 | LOC119621 | 0.713037 | 3.680016 | 4.018067 | 0.915867 | 0.359737 | NA       | 0        | 0        | 0        | 0        | 4.278221 | 0        |
| 28493 | STOML3    | 0.713037 | 3.680016 | 4.018067 | 0.915867 | 0.359737 | NA       | 0        | 0        | 0        | 0        | 4.278221 | 0        |
| 28513 | LOC103241 | 0.713037 | 3.680016 | 4.018067 | 0.915867 | 0.359737 | NA       | 0        | 0        | 0        | 0        | 4.278221 | 0        |
| 28552 | LOC103231 | 0.713037 | 3.680016 | 4.018067 | 0.915867 | 0.359737 | NA       | 0        | 0        | 0        | 0        | 4.278221 | 0        |
| 28574 | LOC103231 | 0.713037 | 3.680016 | 4.018067 | 0.915867 | 0.359737 | NA       | 0        | 0        | 0        | 0        | 4.278221 | 0        |
| 28587 | LOC103231 | 0.713037 | 3.680016 | 4.018067 | 0.915867 | 0.359737 | NA       | 0        | 0        | 0        | 0        | 4.278221 | 0        |
| 28614 | SMIM21    | 0.713037 | 3.680016 | 4.018067 | 0.915867 | 0.359737 | NA       | 0        | 0        | 0        | 0        | 4.278221 | 0        |
| 28642 | DPPA3     | 0.713037 | 3.680016 | 4.018067 | 0.915867 | 0.359737 | NA       | 0        | 0        | 0        | 0        | 4.278221 | 0        |
| 28727 | LOC119621 | 0.713037 | 3.680016 | 4.018067 | 0.915867 | 0.359737 | NA       | 0        | 0        | 0        | 0        | 4.278221 | 0        |
| 28748 | LOC103231 | 0.713037 | 3.680016 | 4.018067 | 0.915867 | 0.359737 | NA       | 0        | 0        | 0        | 0        | 4.278221 | 0        |
| 28809 | LOC119621 | 0.713037 | 3.680016 | 4.018067 | 0.915867 | 0.359737 | NA       | 0        | 0        | 0        | 0        | 4.278221 | 0        |
| 28817 | LOC103221 | 0.713037 | 3.680016 | 4.018067 | 0.915867 | 0.359737 | NA       | 0        | 0        | 0        | 0        | 4.278221 | 0        |
| 28917 | LOC103221 | 0.713037 | 3.680016 | 4.018067 | 0.915867 | 0.359737 | NA       | 0        | 0        | 0        | 0        | 4.278221 | 0        |
| 28996 | MPC1L     | 0.713037 | 3.680016 | 4.018067 | 0.915867 | 0.359737 | NA       | 0        | 0        | 0        | 0        | 4.278221 | 0        |
| 29009 | LOC103231 | 0.713037 | 3.680016 | 4.018067 | 0.915867 | 0.359737 | NA       | 0        | 0        | 0        | 0        | 4.278221 | 0        |
| 29030 | LOC119621 | 0.713037 | 3.680016 | 4.018067 | 0.915867 | 0.359737 | NA       | 0        | 0        | 0        | 0        | 4.278221 | 0        |
| 29094 | FABP1     | 0.713037 | 3.680016 | 4.018067 | 0.915867 | 0.359737 | NA       | 0        | 0        | 0        | 0        | 4.278221 | 0        |
| 29122 | LOC119621 | 0.713037 | 3.680016 | 4.018067 | 0.915867 | 0.359737 | NA       | 0        | 0        | 0        | 0        | 4.278221 | 0        |
| 29195 | LOC119621 | 0.713037 | 3.680016 | 4.018067 | 0.915867 | 0.359737 | NA       | 0        | 0        | 0        | 0        | 4.278221 | 0        |
| 29310 | LOC119621 | 0.713037 | 3.680016 | 4.018067 | 0.915867 | 0.359737 | NA       | 0        | 0        | 0        | 0        | 4.278221 | 0        |
| 29387 | LOC119621 | 0.713037 | 3.680016 | 4.018067 | 0.915867 | 0.359737 | NA       | 0        | 0        | 0        | 0        | 4.278221 | 0        |
| 29454 | LOC103231 | 0.713037 | 3.680016 | 4.018067 | 0.915867 | 0.359737 | NA       | 0        | 0        | 0        | 0        | 4.278221 | 0        |
| 6390  | LOC119621 | 24.55698 | 3.679858 | 0.923857 | 3.983147 | 6.80E-05 | 0.000283 | 0        | 0.547412 | 10.43597 | 51.33892 | 59.8951  | 25.12449 |
| 2877  | ITGAD     | 64.22726 | 3.679797 | 0.55932  | 6.579051 | 4.73E-11 | 4.38E-10 | 3.252518 | 4.926706 | 20.17621 | 127.2312 | 160.4333 | 69.34358 |
| 15267 | DIO3      | 20.64623 | 3.679221 | 2.060968 | 1.785191 | 0.07423  | 0.129259 | 0        | 0        | 9.044508 | 35.71403 | 62.03421 | 17.08465 |
| 9050  | KRT13     | 8.384737 | 3.677375 | 1.187568 | 3.09656  | 0.001958 | 0.005751 | 0        | 2.189647 | 1.391463 | 22.32127 | 21.39111 | 3.014938 |
| 7412  | ESM1      | 13.82165 | 3.676387 | 1.022412 | 3.5958   | 0.000323 | 0.00116  | 0        | 3.831883 | 2.087194 | 33.4819  | 38.50399 | 5.024897 |
| 9251  | GUCA1A    | 8.319176 | 3.674427 | 1.207644 | 3.04264  | 0.002345 | 0.006739 | 2.168345 | 0        | 1.391463 | 13.39276 | 29.94755 | 3.014938 |
| 6021  | NWD2      | 20.98678 | 3.67439  | 0.884393 | 4.154705 | 3.26E-05 | 0.000144 | 0        | 4.926706 | 4.174388 | 46.87467 | 59.8951  | 10.04979 |
| 10166 | ACP4      | 5.846324 | 3.674344 | 1.301964 | 2.822155 | 0.00477  | 0.012475 | 0        | 0.547412 | 2.087194 | 17.85702 | 8.556443 | 6.029877 |
| 2300  | GUCY1A1   | 47.97851 | 3.673317 | 0.495634 | 7.411357 | 1.25E-13 | 1.44E-12 | 2.168345 | 9.306001 | 9.740239 | 73.66019 | 100.5382 | 92.45811 |
| 9612  | LOC119621 | 10.71156 | 3.673139 | 1.241964 | 2.957524 | 0.003101 | 0.008577 | 0        | 0        | 4.87012  | 6.696381 | 40.6431  | 12.05975 |
| 8156  | FAM3B     | 8.148583 | 3.671601 | 1.091591 | 3.363532 | 0.00077  | 0.002508 | 0.542086 | 2.189647 | 0.695731 | 22.32127 | 17.11289 | 6.029877 |
| 9814  | CDHR5     | 7.559044 | 3.671486 | 1.26521  | 2.901879 | 0.003709 | 0.010048 | 0        | 0        | 4.876657 | 17.85702 | 14.97377 | 9.044815 |
| 8705  | LOC119621 | 10.63106 | 3.670706 | 1.146696 | 3.201116 | 0.001369 | 0.004182 | 0        | 0        | 4.87012  | 22.32127 | 23.53022 | 13.06473 |
| 7364  | C9        | 9.643216 | 3.670032 | 1.01611  | 3.611845 | 0.000304 | 0.001098 | 1.084173 | 1.642235 | 1.391463 | 15.62489 | 32.08666 | 6.029877 |
| 10097 | GBX1      | 5.798928 | 3.66687  | 1.291537 | 2.839153 | 0.004523 | 0.01191  | 0.542086 | 0        | 2.087194 | 11.16063 | 14.97377 | 6.029877 |
| 4491  | ATP2B2    | 19.13276 | 3.665182 | 0.730735 | 5.015745 | 5.28E-07 | 3.13E-06 | 1.626259 | 3.831883 | 2.782925 | 42.41041 | 47.06043 | 17.08465 |
| 3478  | CACNG6    | 27.68092 | 3.665106 | 0.623337 | 5.879811 | 4.11E-09 | 3.14E-08 | 4.336691 | 2.189647 | 5.565851 | 66.96381 | 59.8951  | 27.13445 |
| 8574  | CLEC20A   | 6.949614 | 3.664602 | 1.132687 | 3.235318 | 0.001215 | 0.003768 | 1.084173 | 0.547412 | 1.391463 | 13.39276 | 19.252   | 6.029877 |
| 841   | CYP19A1   | 99.70743 | 3.663755 | 0.31     | 11.81858 | 3.13E-32 | 9.89E-31 | 13.01007 | 15.32753 | 15.30609 | 216.5163 | 173.268  | 164.8166 |
| 11800 | MLXIPL    | 29.13851 | 3.663581 | 1.49593  | 2.449032 | 0.014324 | 0.032272 | 1.084173 | 0        | 11.82743 | 58.0353  | 72.72976 | 31.15436 |
| 9831  | LOC119621 | 9.159626 | 3.663303 | 1.263682 | 2.898913 | 0.003745 | 0.010127 | 0        | 0        | 4.174388 | 20.08914 | 25.66933 | 5.024897 |
| 8624  | RPRML     | 10.3088  | 3.662675 | 1.136631 | 3.222396 | 0.001271 | 0.003919 | 0        | 0.547412 | 4.174388 | 6.696381 | 36.36488 | 14.06971 |
| 10343 | HOXB1     | 5.836843 | 3.662195 | 1.318023 | 2.778552 | 0.00546  | 0.014035 | 0        | 0.547412 | 2.087194 | 13.39276 | 14.97377 | 4.019918 |
| 7554  | NT5DC4    | 9.915253 | 3.661643 | 1.034139 | 3.540764 | 0.000399 | 0.001404 | 1.626259 | 0        | 2.782925 | 26.78552 | 19.252   | 9.044815 |
| 15494 | MUC5B     | 23.52922 | 3.658105 | 2.095859 | 1.745397 | 0.080916 | 0.138837 | 0        | 0        | 10.43597 | 40.17829 | 68.45154 | 22.10955 |
| 10312 | WNT8A     | 6.963434 | 3.657918 | 1.313235 | 2.785425 | 0.005346 | 0.013779 | 0        | 1.642235 | 1.391463 | 8.928508 | 27.80844 | 2.009959 |
| 10898 | SCT       | 5.976529 | 3.657505 | 1.379733 | 2.650878 | 0.008028 | 0.019581 | 0        | 0        | 2.782925 | 8.928508 | 17.11289 | 7.034856 |
| 10900 | CHRNA4    | 5.976529 | 3.657505 | 1.379733 | 2.650878 | 0.008028 | 0.019581 | 0        | 0        | 2.782925 | 8.928508 | 17.11289 | 7.034856 |
| 10537 | LOC103221 | 5.80495  | 3.656897 | 1.335786 | 2.737638 | 0.006188 | 0.015613 | 0.542086 | 0        | 2.087194 | 8.928508 | 19.252   | 4.019918 |
| 9327  | CCDC188   | 10.6121  | 3.656    | 1.208891 | 3.024259 | 0.002492 | 0.007105 | 0        | 0        | 4.87012  | 13.39276 | 36.36488 | 9.044815 |
| 7993  | LOC103221 | 10.28685 | 3.655957 | 1.070613 | 3.414826 | 0.000638 | 0.002123 | 0        | 0.547412 | 4.174388 | 24.5534  | 21.39111 | 11.05477 |



|       |           |          |          |          |          |           |           |          |          |          |          |          |          |
|-------|-----------|----------|----------|----------|----------|-----------|-----------|----------|----------|----------|----------|----------|----------|
| 11996 | LOC119624 | 4.418997 | 3.654113 | 1.517962 | 2.40725  | 0.016073  | 0.035621  | 0        | 0        | 2.087194 | 6.696381 | 10.69555 | 7.034856 |
| 4512  | TTBK1     | 25.77445 | 3.654009 | 0.729878 | 5.006331 | 5.55E-07  | 3.27E-06  | 0.542086 | 2.737059 | 8.348776 | 60.26743 | 55.61688 | 27.13445 |
| 11527 | LOC103237 | 4.278424 | 3.65395  | 1.456823 | 2.508163 | 0.012136  | 0.02799   | 0.542086 | 0        | 1.391463 | 11.16063 | 8.556443 | 4.019918 |
| 10363 | SIGLEC5   | 5.378354 | 3.650936 | 1.316256 | 2.773728 | 0.005542  | 0.014217  | 0        | 1.642235 | 0.695731 | 8.928508 | 14.97377 | 6.029877 |
| 4318  | EXOC3L4   | 21.03718 | 3.650208 | 0.709805 | 5.142549 | 2.71E-07  | 1.67E-06  | 2.168345 | 1.094824 | 6.261582 | 44.64254 | 44.92132 | 27.13445 |
| 11051 | LOC119625 | 5.827363 | 3.649796 | 1.39555  | 2.615311 | 0.008915  | 0.021446  | 0        | 0.547412 | 2.087194 | 8.928508 | 21.39111 | 2.009959 |
| 10633 | CCDC175   | 5.613621 | 3.649461 | 1.346434 | 2.710465 | 0.006719  | 0.016799  | 0        | 1.094824 | 1.391463 | 8.928508 | 19.252   | 3.014938 |
| 6822  | SLFN14    | 12.85344 | 3.649185 | 0.957899 | 3.809572 | 0.000139  | 0.000542  | 0        | 1.642235 | 4.174388 | 35.71403 | 23.53022 | 12.05975 |
| 12083 | LOC103235 | 4.118101 | 3.64882  | 1.526453 | 2.390391 | 0.01683   | 0.03703   | 0        | 1.094824 | 0.695731 | 15.62489 | 4.278221 | 3.014938 |
| 11896 | KCNMB2    | 3.761382 | 3.648788 | 1.504018 | 2.426027 | 0.015265  | 0.034114  | 0.542086 | 1.094824 | 0        | 4.464254 | 6.417332 | 10.04979 |
| 6602  | ERG       | 23.87857 | 3.64876  | 0.935156 | 3.901765 | 9.55E-05  | 0.000385  | 1.084173 | 0        | 9.740239 | 44.64254 | 72.72976 | 15.07469 |
| 5559  | LOC119627 | 23.36127 | 3.648525 | 0.831213 | 4.389397 | 1.14E-05  | 5.44E-05  | 1.626259 | 0        | 9.044508 | 46.87467 | 53.47777 | 29.1444  |
| 11886 | BARHL1    | 4.17425  | 3.648341 | 1.502232 | 2.428612 | 0.015157  | 0.033901  | 0        | 0.547412 | 1.391463 | 2.232127 | 12.83466 | 8.039836 |
| 11558 | TFAP2D    | 4.263809 | 3.647332 | 1.45716  | 2.503041 | 0.012313  | 0.028319  | 0        | 0.547412 | 1.391463 | 8.928508 | 10.69555 | 4.019918 |
| 11559 | LOC119627 | 4.263809 | 3.647332 | 1.45716  | 2.503041 | 0.012313  | 0.028319  | 0        | 0.547412 | 1.391463 | 8.928508 | 10.69555 | 4.019918 |
| 12479 | LINC02694 | 3.81816  | 3.643451 | 1.580826 | 2.304777 | 0.021179  | 0.045119  | 1.626259 | 0        | 0        | 6.696381 | 8.556443 | 6.029877 |
| 8680  | LOC103215 | 8.354264 | 3.643206 | 1.13548  | 3.208515 | 0.001334  | 0.004086  | 1.626259 | 0        | 2.087194 | 17.85702 | 23.53022 | 5.024897 |
| 6875  | LOC119620 | 16.22635 | 3.641971 | 0.961545 | 3.787624 | 0.000152  | 0.000588  | 0        | 0.547412 | 6.957314 | 31.24978 | 38.50399 | 20.09959 |
| 13963 | SLC46A2   | 2.861466 | 3.641519 | 1.803584 | 2.019046 | 0.043482  | 0.082789  | 0        | 0        | 1.391463 | 4.464254 | 4.278221 | 7.034856 |
| 100   | PTGER3    | 521.9578 | 3.641159 | 0.149899 | 24.29071 | 2.46E-130 | 6.47E-128 | 80.77087 | 75.54283 | 75.83472 | 1015.618 | 926.2349 | 957.7454 |
| 8459  | MPIG6B    | 8.496612 | 3.640294 | 1.114788 | 3.265458 | 0.001093  | 0.003435  | 0        | 1.094824 | 2.782925 | 13.39276 | 25.66933 | 8.039836 |
| 5749  | OXTR      | 11.79836 | 3.640269 | 0.846506 | 4.300347 | 1.71E-05  | 7.89E-05  | 1.626259 | 1.642235 | 2.087194 | 22.32127 | 14.97377 | 28.13943 |
| 11849 | CD37      | 4.231916 | 3.640183 | 1.493944 | 2.436626 | 0.014825  | 0.033262  | 0.542086 | 0        | 1.391463 | 4.464254 | 14.97377 | 4.019918 |
| 12625 | LOC103227 | 3.873353 | 3.639429 | 1.598785 | 2.276371 | 0.022824  | 0.048061  | 0        | 1.642235 | 0        | 11.16063 | 6.417332 | 4.019918 |
| 9668  | LOC103240 | 7.075148 | 3.63868  | 1.237563 | 2.940197 | 0.00328   | 0.009019  | 0        | 1.094824 | 2.087194 | 24.5534  | 10.69555 | 4.019918 |
| 13408 | LOC103225 | 49.02697 | 3.638515 | 1.711948 | 2.125366 | 0.033556  | 0.066534  | 0        | 1.094824 | 20.87194 | 87.05295 | 136.9031 | 48.23901 |
| 12444 | LOC103234 | 4.462048 | 3.638421 | 1.574031 | 2.311531 | 0.020804  | 0.04444   | 0        | 0        | 2.087194 | 6.696381 | 14.97377 | 3.014938 |
| 12445 | ANGPTL1   | 4.462048 | 3.638421 | 1.574031 | 2.311531 | 0.020804  | 0.04444   | 0        | 0        | 2.087194 | 6.696381 | 14.97377 | 3.014938 |
| 8915  | ZNFB62    | 12.01161 | 3.637524 | 1.158423 | 3.140065 | 0.001689  | 0.005037  | 0        | 0        | 5.565851 | 20.08914 | 36.36488 | 10.04979 |
| 11993 | ZIC1      | 36.14111 | 3.636871 | 1.510418 | 2.407858 | 0.016046  | 0.03557   | 0        | 1.642235 | 14.61036 | 71.42806 | 91.98176 | 37.18424 |
| 13751 | LOC103247 | 2.684752 | 3.636732 | 1.767287 | 2.057805 | 0.039609  | 0.076576  | 0        | 0.547412 | 0.695731 | 6.696381 | 2.139111 | 6.029877 |
| 9332  | LOC119618 | 8.875023 | 3.636405 | 1.202769 | 3.02336  | 0.0025    | 0.007122  | 0        | 0        | 4.174388 | 15.62489 | 21.39111 | 12.05975 |
| 7954  | TNK1      | 13.27144 | 3.634396 | 1.061489 | 3.423865 | 0.000617  | 0.002063  | 0        | 0.547412 | 5.565851 | 31.24978 | 34.22577 | 8.039836 |
| 9417  | LOC103215 | 7.057241 | 3.63404  | 1.210003 | 3.00333  | 0.00267   | 0.007539  | 0        | 0.547412 | 2.782925 | 6.696381 | 19.252   | 13.06473 |
| 12602 | RDH8      | 3.857851 | 3.633906 | 1.592285 | 2.282195 | 0.022478  | 0.047419  | 0        | 1.642235 | 0        | 8.928508 | 8.556443 | 4.019918 |
| 11408 | LOC119627 | 4.018174 | 3.633856 | 1.433804 | 2.534416 | 0.011263  | 0.02625   | 0.542086 | 0.547412 | 0.695731 | 4.464254 | 12.83466 | 5.024897 |
| 5419  | PAX5      | 26.0159  | 3.633852 | 0.816365 | 4.451261 | 8.54E-06  | 4.19E-05  | 0.542086 | 1.642235 | 9.740239 | 33.4819  | 85.56443 | 25.12449 |
| 7392  | LOC119627 | 11.43213 | 3.633686 | 1.008755 | 3.60215  | 0.000316  | 0.001135  | 0        | 1.094824 | 4.174388 | 22.32127 | 29.94755 | 11.05477 |
| 12373 | CLUL1     | 5.743827 | 3.633389 | 1.561414 | 2.326986 | 0.019966  | 0.0429    | 0        | 0.547412 | 2.087194 | 0        | 27.80844 | 4.019918 |
| 11856 | ZP2       | 4.019062 | 3.633193 | 1.492396 | 2.43447  | 0.014914  | 0.033441  | 0        | 1.094824 | 0.695731 | 4.464254 | 12.83466 | 5.024897 |
| 6579  | HEPH      | 10.77788 | 3.632439 | 0.929201 | 3.909209 | 9.26E-05  | 0.000374  | 2.168345 | 0.547412 | 2.087194 | 17.85702 | 29.94755 | 12.05975 |
| 5293  | FRMPD4    | 30.13446 | 3.632184 | 0.803359 | 4.521247 | 6.15E-06  | 3.09E-05  | 0        | 3.284471 | 10.43597 | 66.96381 | 77.00798 | 23.11453 |
| 9864  | ZP3       | 6.420892 | 3.631749 | 1.256506 | 2.890356 | 0.003848  | 0.010371  | 2.168345 | 0.547412 | 0        | 20.08914 | 10.69555 | 5.024897 |
| 14037 | GCG       | 2.935522 | 3.6317   | 1.80976  | 2.00673  | 0.044778  | 0.084789  | 0        | 0        | 1.391463 | 8.928508 | 4.278221 | 3.014938 |
| 14039 | LOC103237 | 2.935522 | 3.6317   | 1.80976  | 2.00673  | 0.044778  | 0.084789  | 0        | 0        | 1.391463 | 8.928508 | 4.278221 | 3.014938 |
| 9585  | LOC103238 | 8.881045 | 3.630626 | 1.224798 | 2.964265 | 0.003034  | 0.008414  | 0        | 0        | 4.174388 | 13.39276 | 25.66933 | 10.04979 |
| 6759  | LOC103237 | 13.82803 | 3.630501 | 0.947471 | 3.831781 | 0.000127  | 0.0005    | 0        | 2.737059 | 3.478657 | 33.4819  | 34.22577 | 9.044815 |
| 12473 | CIBAR2    | 4.093118 | 3.63028  | 1.57423  | 2.306067 | 0.021107  | 0.044987  | 0        | 1.094824 | 0.695731 | 8.928508 | 12.83466 | 1.004979 |
| 3427  | SYT16     | 34.10635 | 3.629717 | 0.613317 | 5.918173 | 3.26E-09  | 2.53E-08  | 3.252518 | 4.379295 | 7.653045 | 66.96381 | 96.25998 | 26.12947 |
| 9577  | LOC103237 | 10.4446  | 3.628257 | 1.223012 | 2.966657 | 0.003011  | 0.008357  | 0        | 0        | 4.87012  | 13.39276 | 36.36488 | 8.039836 |
| 13069 | LOC103214 | 3.863873 | 3.627944 | 1.654005 | 2.19343  | 0.028276  | 0.05752   | 0        | 1.642235 | 0        | 6.696381 | 12.83466 | 2.009959 |
| 13815 | LOC103227 | 2.72178  | 3.627637 | 1.773737 | 2.045195 | 0.040836  | 0.078582  | 0        | 0.547412 | 0.695731 | 8.928508 | 2.139111 | 4.019918 |
| 9228  | POTEA     | 6.923578 | 3.627167 | 1.190069 | 3.047864 | 0.002305  | 0.00664   | 0        | 1.094824 | 2.087194 | 8.928508 | 21.39111 | 8.039836 |
| 4735  | LOC103224 | 20.74566 | 3.626863 | 0.746503 | 4.858473 | 1.18E-06  | 6.64E-06  | 2.168345 | 1.094824 | 6.261582 | 26.78552 | 62.03421 | 26.12947 |
| 13982 | LOC103245 | 2.920019 | 3.626    | 1.799332 | 2.015192 | 0.043885  | 0.083441  | 0        | 0        | 1.391463 | 6.696381 | 6.417332 | 3.014938 |
| 657   | SEMA5B    | 129.8758 | 3.625878 | 0.27714  | 13.08319 | 4.11E-39  | 1.66E-37  | 21.68345 | 14.78012 | 22.2634  | 218.7484 | 254.5542 | 247.2249 |
| 867   | MYL3      | 126.6695 | 3.625348 | 0.309956 | 11.69632 | 1.33E-31  | 4.08E-30  | 15.7205  | 24.63353 | 16.69755 | 254.4625 | 171.1289 | 277.3743 |
| 10335 | FBP2      | 7.39757  | 3.625307 | 1.303676 | 2.780833 | 0.005422  | 0.013947  | 0        | 0        | 3.478657 | 15.62489 | 19.252   | 6.029877 |
| 7531  | MYO3B     | 9.592827 | 3.625253 | 1.021614 | 3.548554 | 0.000387  | 0.001367  | 0        | 1.642235 | 2.782925 | 13.39276 | 25.66933 | 14.06971 |
| 489   | NID2      | 156.1515 | 3.624113 | 0.245712 | 14.74943 | 3.10E-49  | 1.69E-47  | 23.30971 | 20.80165 | 26.43779 | 283.4801 | 299.4755 | 283.4042 |
| 15175 | REC114    | 2.795836 | 3.624094 | 2.012031 | 1.801212 | 0.071669  | 0.125557  | 0        | 0.547412 | 0.695731 | 13.39276 | 2.139111 | 0        |
| 8844  | LOC119625 | 6.693446 | 3.624056 | 1.147538 | 3.158115 | 0.001588  | 0.004773  | 0.542086 | 1.094824 | 1.391463 | 6.696381 | 21.39111 | 9.044815 |
| 7716  | MYH4      | 15.99579 | 3.622601 | 1.038421 | 3.488569 | 0.000486  | 0.001673  | 0        | 1.094824 | 6.261582 | 31.24978 | 51.33866 | 6.029877 |
| 13646 | LOC119627 | 2.706277 | 3.62161  | 1.740966 | 2.08023  | 0.037504  | 0.073066  | 0        | 0.547412 | 0.695731 | 6.696381 | 4.278221 | 4.019918 |
| 14202 | LOC103235 | 2.867488 | 3.621102 | 1.832362 | 1.976194 | 0.048133  | 0.090101  | 0        | 0        | 1.391463 | 2.232127 | 8.556443 | 5.024897 |
| 3748  | CUNH1orf  | 31.58087 | 3.620531 | 0.646968 | 5.596156 | 2.19E-08  | 1.55E-07  | 2.710432 | 3.284471 | 8.348776 | 58.0353  | 91.98176 | 25.12449 |
| 14089 | LOC103220 | 2.758808 | 3.61988  | 1.812837 | 1.996804 | 0.045846  | 0.086509  | 0        | 0.547412 | 0.695731 | 11.16063 | 2.139111 | 2.009959 |
| 8470  | BARX2     | 8.472259 | 3.619702 | 1.109496 | 3.262474 | 0.001104  | 0.003467  | 0        | 0.547412 | 3.478657 | 15.62489 | 17.11289 | 14.06971 |
| 14987 | LOC119627 | 2.779446 | 3.618722 | 1.970486 | 1.836462 | 0.066289  | 0.117589  | 0.542086 | 0        | 0.695731 | 11.16063 | 4.278221 | 0        |
| 5831  | SGIP1     | 27.79686 | 3.616678 | 0.849414 | 4.257853 | 2.06E-05  | 9.41E-05  | 0.542086 | 0.547412 | 11.82743 | 66.96381 | 57.75599 | 29.1444  |
| 10970 | SIGLEC6   | 5.80301  | 3.616589 | 1.372364 | 2.635299 | 0.008406  | 0.020372  | 0        | 0        | 2.782925 | 11.16063 | 12.83466 | 8.039836 |
| 10627 | TRIM17    | 7.21243  | 3.615701 | 1.333364 | 2.711713 | 0.006694  | 0.016745  | 0        | 0        | 3.478657 | 4.464254 | 19.252   | 16.07967 |
| 13868 | ANKRD33   | 2.742418 | 3.615226 | 1.775384 | 2.036307 |           |           |          |          |          |          |          |          |



|       |           |          |          |          |          |           |           |          |          |          |          |          |          |
|-------|-----------|----------|----------|----------|----------|-----------|-----------|----------|----------|----------|----------|----------|----------|
| 13668 | LOC103232 | 2.690775 | 3.615157 | 1.742301 | 2.074932 | 0.037993  | 0.073898  | 0        | 0.547412 | 0.695731 | 4.464254 | 6.417332 | 4.019918 |
| 7194  | LOC103220 | 8.976487 | 3.613409 | 0.984965 | 3.668567 | 0.000244  | 0.000901  | 1.626259 | 1.642235 | 0.695731 | 11.16063 | 25.66933 | 13.06473 |
| 11322 | SFRP5     | 5.877066 | 3.61313  | 1.415617 | 2.552335 | 0.0107    | 0.025125  | 0        | 0        | 2.782925 | 15.62489 | 12.83466 | 4.019918 |
| 5880  | PRKCB     | 29.26137 | 3.612773 | 0.855093 | 4.225007 | 2.39E-05  | 0.000108  | 0.542086 | 0.547412 | 12.52316 | 55.80317 | 77.00798 | 29.1444  |
| 7693  | CYP2W1    | 8.108464 | 3.612558 | 1.033386 | 3.495847 | 0.000473  | 0.001633  | 0.542086 | 1.094824 | 2.087194 | 15.62489 | 19.252   | 10.04979 |
| 11052 | LOC119620 | 5.787507 | 3.612246 | 1.381227 | 2.615245 | 0.008916  | 0.021446  | 0        | 0        | 2.782925 | 8.928508 | 14.97377 | 8.039836 |
| 14947 | LOC103245 | 2.763943 | 3.610673 | 1.955799 | 1.846137 | 0.064872  | 0.115383  | 0.542086 | 0        | 0.695731 | 8.928508 | 6.417332 | 0        |
| 15158 | LOC103225 | 2.566591 | 3.610174 | 2.000566 | 1.804576 | 0.071141  | 0.124771  | 0        | 1.094824 | 0        | 11.16063 | 2.139111 | 1.004979 |
| 13279 | LOXHD1    | 49.35588 | 3.609859 | 1.677706 | 2.151663 | 0.031424  | 0.062912  | 0        | 1.642235 | 20.87194 | 102.6778 | 134.764  | 36.17926 |
| 9055  | CCDC177   | 8.573863 | 3.607641 | 1.165896 | 3.094308 | 0.001973  | 0.005792  | 0        | 0.547412 | 3.478657 | 17.85702 | 23.53022 | 6.029877 |
| 6251  | LOC103225 | 16.72024 | 3.60647  | 0.890433 | 4.050242 | 5.12E-05  | 0.000218  | 0        | 2.189647 | 5.565851 | 35.71403 | 42.78221 | 14.06971 |
| 5240  | DNAH8     | 17.76367 | 3.6056   | 0.790921 | 4.558733 | 5.15E-06  | 2.61E-05  | 1.626259 | 1.642235 | 4.87012  | 46.87467 | 38.50399 | 13.06473 |
| 5904  | LHFPL1    | 24.2674  | 3.604238 | 0.856196 | 4.209594 | 2.56E-05  | 0.000115  | 0        | 1.642235 | 9.740239 | 33.4819  | 70.59065 | 30.14938 |
| 14602 | THEMIS2   | 2.926042 | 3.604142 | 1.891602 | 1.905338 | 0.056736  | 0.103289  | 0        | 0        | 1.391463 | 4.464254 | 10.69555 | 1.004979 |
| 418   | MYOM2     | 198.6756 | 3.604052 | 0.23299  | 15.46868 | 5.65E-54  | 3.59E-52  | 34.15144 | 31.20247 | 25.04633 | 372.7652 | 320.8666 | 408.0217 |
| 6447  | PLEKHS1   | 15.59276 | 3.602339 | 0.909424 | 3.96112  | 7.46E-05  | 0.000308  | 0.542086 | 0.547412 | 6.261582 | 40.17829 | 29.94755 | 16.07967 |
| 60    | TMEM86A   | 846.4103 | 3.601035 | 0.127683 | 28.2029  | 5.39E-175 | 2.39E-172 | 124.1378 | 129.7366 | 133.5804 | 1497.757 | 1555.133 | 1638.117 |
| 10683 | LOC119625 | 5.027234 | 3.599423 | 1.335268 | 2.695656 | 0.007025  | 0.017482  | 0.542086 | 1.642235 | 0        | 13.39276 | 8.556443 | 6.029877 |
| 14894 | SLC34A2   | 2.910539 | 3.595442 | 1.937843 | 1.855383 | 0.063541  | 0.113418  | 0        | 0        | 1.391463 | 2.232127 | 12.83466 | 1.004979 |
| 13079 | LOC103235 | 4.35054  | 3.595284 | 1.640866 | 2.191089 | 0.028445  | 0.05782   | 0        | 0        | 2.087194 | 17.85702 | 2.139111 | 4.019918 |
| 11859 | RTP5      | 5.719474 | 3.59397  | 1.476464 | 2.434174 | 0.014926  | 0.03346   | 0        | 0        | 2.782925 | 2.232127 | 19.252   | 10.04979 |
| 13172 | KCNC2     | 23.71604 | 3.593765 | 1.651497 | 2.176065 | 0.02955   | 0.059642  | 0        | 0.547412 | 10.43597 | 44.64254 | 70.59065 | 16.07967 |
| 14867 | LOC103230 | 2.48128  | 3.593393 | 1.932206 | 1.859736 | 0.062923  | 0.112518  | 1.084173 | 0        | 0        | 2.232127 | 8.556443 | 3.014938 |
| 8942  | GLDN      | 9.594968 | 3.591721 | 1.146055 | 3.133987 | 0.001724  | 0.005127  | 0        | 1.642235 | 2.782925 | 22.32127 | 27.80844 | 3.014938 |
| 3731  | LOC119615 | 39.85164 | 3.589968 | 0.639854 | 5.610602 | 2.02E-08  | 1.44E-07  | 1.084173 | 4.379295 | 13.2189  | 73.66019 | 100.5382 | 46.22906 |
| 22    | ABCC2     | 8111.442 | 3.589561 | 0.099261 | 36.16302 | 2.32E-286 | 2.81E-283 | 1206.142 | 1323.642 | 1203.615 | 14258.83 | 14272.15 | 16404.28 |
| 10520 | KRT27     | 5.231496 | 3.589198 | 1.310111 | 2.739614 | 0.006151  | 0.015544  | 0.542086 | 1.094824 | 0.695731 | 8.928508 | 17.11289 | 3.014938 |
| 497   | DGAT2     | 155.116  | 3.588657 | 0.244705 | 14.66525 | 1.08E-48  | 5.76E-47  | 21.14137 | 24.08612 | 26.43779 | 285.7123 | 290.9191 | 282.3992 |
| 4858  | PRSS42P   | 15.4796  | 3.58797  | 0.751548 | 4.774107 | 1.81E-06  | 9.88E-06  | 2.710432 | 2.189647 | 2.087194 | 35.71403 | 32.08666 | 18.08963 |
| 15265 | CARD17    | 2.502805 | 3.587662 | 2.00954  | 1.785315 | 0.07421   | 0.129242  | 1.084173 | 0        | 0        | 2.232127 | 10.69555 | 1.004979 |
| 15049 | LOC119624 | 2.681294 | 3.587409 | 1.966667 | 1.824106 | 0.068136  | 0.120351  | 0        | 0.547412 | 0.695731 | 0        | 12.83466 | 2.009959 |
| 16166 | LOC119624 | 2.489078 | 3.586494 | 2.195929 | 1.633247 | 0.102417  | 0.168425  | 0        | 1.094824 | 0        | 0        | 12.83466 | 1.004979 |
| 6209  | OPN5      | 16.59685 | 3.586356 | 0.881333 | 4.069243 | 4.72E-05  | 0.000202  | 0        | 1.642235 | 6.261582 | 26.78552 | 42.78221 | 22.10955 |
| 14890 | BPIFB6    | 2.483055 | 3.58593  | 1.931442 | 1.856608 | 0.063367  | 0.11314   | 0        | 1.094824 | 0        | 2.232127 | 8.556443 | 3.014938 |
| 10376 | LOC103214 | 7.156017 | 3.585197 | 1.294219 | 2.770164 | 0.005603  | 0.014356  | 0        | 0        | 3.478657 | 11.16063 | 19.252   | 9.044815 |
| 8450  | LOC103248 | 7.84088  | 3.584547 | 1.096585 | 3.268826 | 0.00108   | 0.003398  | 1.084173 | 1.094824 | 1.391463 | 29.01765 | 6.417332 | 8.039836 |
| 15051 | LOC119625 | 2.520083 | 3.583285 | 1.964373 | 1.824137 | 0.068131  | 0.120351  | 0        | 1.094824 | 0        | 4.464254 | 8.556443 | 1.004979 |
| 12056 | ESX1      | 3.876548 | 3.582832 | 1.495758 | 2.395328 | 0.016606  | 0.036617  | 0        | 1.094824 | 0.695731 | 11.16063 | 4.278221 | 6.029877 |
| 9492  | LOC119620 | 6.59487  | 3.582639 | 1.199732 | 2.986199 | 0.002825  | 0.007911  | 0        | 1.642235 | 1.391463 | 13.39276 | 17.11289 | 6.029877 |
| 7261  | SDK1      | 12.15271 | 3.582293 | 0.981627 | 3.649342 | 0.000263  | 0.000963  | 0        | 2.189647 | 3.478657 | 37.94616 | 19.252   | 10.04979 |
| 4251  | BTNL9     | 47.72277 | 3.581865 | 0.690499 | 5.187355 | 2.13E-07  | 1.33E-06  | 1.084173 | 3.284471 | 18.08902 | 113.8385 | 104.8164 | 45.22408 |
| 11837 | LOC119620 | 4.059284 | 3.580923 | 1.468041 | 2.439253 | 0.014718  | 0.033052  | 0        | 0.547412 | 1.391463 | 6.696381 | 10.69555 | 5.024897 |
| 11838 | PRTN3     | 4.059284 | 3.580923 | 1.468041 | 2.439253 | 0.014718  | 0.033052  | 0        | 0.547412 | 1.391463 | 6.696381 | 10.69555 | 5.024897 |
| 7472  | PATL2     | 20.15144 | 3.578173 | 1.001848 | 3.571574 | 0.000355  | 0.001263  | 0        | 0.547412 | 9.044508 | 26.78552 | 68.45154 | 16.07967 |
| 12591 | LOC103234 | 4.273026 | 3.577599 | 1.565282 | 2.285594 | 0.022278  | 0.047031  | 0        | 0        | 2.087194 | 6.696381 | 12.83466 | 4.019918 |
| 12592 | CUNH2orf8 | 4.273026 | 3.577599 | 1.565282 | 2.285594 | 0.022278  | 0.047031  | 0        | 0        | 2.087194 | 6.696381 | 12.83466 | 4.019918 |
| 12593 | GSX1      | 4.273026 | 3.577599 | 1.565282 | 2.285594 | 0.022278  | 0.047031  | 0        | 0        | 2.087194 | 6.696381 | 12.83466 | 4.019918 |
| 10487 | TNFSF8    | 5.436387 | 3.577562 | 1.30205  | 2.747638 | 0.006003  | 0.015217  | 0.542086 | 0        | 2.087194 | 13.39276 | 8.556443 | 8.039836 |
| 8920  | LOC119620 | 8.347813 | 3.577416 | 1.139593 | 3.139206 | 0.001694  | 0.005049  | 0        | 0.547412 | 3.478657 | 15.62489 | 21.39111 | 9.044815 |
| 8651  | LOC119624 | 7.97622  | 3.577023 | 1.112537 | 3.215195 | 0.001304  | 0.004006  | 1.626259 | 0        | 2.087194 | 17.85702 | 19.252   | 7.034856 |
| 10542 | LOC103244 | 6.975846 | 3.574834 | 1.306736 | 2.735696 | 0.006225  | 0.015698  | 0        | 0.547412 | 2.782925 | 6.696381 | 27.80844 | 4.019918 |
| 12141 | PSMB11    | 4.079922 | 3.573197 | 1.502291 | 2.378499 | 0.017383  | 0.038064  | 0.542086 | 0        | 1.391463 | 6.696381 | 12.83466 | 3.014938 |
| 10461 | OTX2      | 5.421772 | 3.572744 | 1.2973   | 2.753985 | 0.005887  | 0.014962  | 0        | 0.547412 | 2.087194 | 11.16063 | 10.69555 | 8.039836 |
| 14238 | SUN3      | 4.362585 | 3.572651 | 1.814248 | 1.969219 | 0.048928  | 0.091358  | 0        | 0        | 2.087194 | 13.39276 | 10.69555 | 0        |
| 17716 | PRR32     | 1.325459 | 3.571452 | 2.584426 | 1.381913 | 0.166998  | 0.250601  | 0        | 0        | 0.695731 | 2.32127  | 0        | 5.024897 |
| 6855  | LOC119625 | 21.43688 | 3.570894 | 0.941262 | 3.79373  | 0.000148  | 0.000576  | 0        | 0.547412 | 9.740239 | 53.57105 | 40.6431  | 24.11951 |
| 12785 | NODAL     | 4.257523 | 3.570882 | 1.592624 | 2.242137 | 0.024953  | 0.051882  | 0        | 0        | 2.087194 | 4.464254 | 14.97377 | 4.019918 |
| 12786 | LOC103225 | 4.257523 | 3.570882 | 1.592624 | 2.242137 | 0.024953  | 0.051882  | 0        | 0        | 2.087194 | 4.464254 | 14.97377 | 4.019918 |
| 8816  | LOC119625 | 14.49115 | 3.570779 | 1.126352 | 3.170215 | 0.001523  | 0.004593  | 0        | 0        | 6.957314 | 35.71403 | 34.22577 | 10.04979 |
| 5885  | LOC119618 | 28.16238 | 3.570777 | 0.845799 | 4.221778 | 2.42E-05  | 0.000109  | 0        | 1.642235 | 11.82743 | 40.17829 | 79.14709 | 36.17926 |
| 8308  | SLC24A4   | 7.894459 | 3.568773 | 1.077782 | 3.31122  | 0.000929  | 0.002972  | 0.542086 | 1.094824 | 2.087194 | 8.928508 | 25.66933 | 9.044815 |
| 12070 | LOC103245 | 3.882571 | 3.567578 | 1.490409 | 2.393691 | 0.01668   | 0.036735  | 0        | 1.094824 | 0.695731 | 8.928508 | 8.556443 | 4.019918 |
| 11462 | FAM181A   | 5.688044 | 3.566265 | 1.412791 | 2.524268 | 0.011594  | 0.026892  | 0        | 0        | 2.782925 | 15.62489 | 10.69555 | 5.024897 |
| 17584 | LOC103235 | 1.362487 | 3.566058 | 2.542093 | 1.402804 | 0.160675  | 0.242916  | 0        | 0        | 0.695731 | 4.464254 | 0        | 3.014938 |
| 17658 | CHRNA6    | 1.337767 | 3.565938 | 2.556482 | 1.394862 | 0.163058  | 0.245491  | 0        | 0.547412 | 0        | 4.464254 | 0        | 3.014938 |
| 10151 | LOC119620 | 6.88932  | 3.563607 | 1.261288 | 2.825372 | 0.004723  | 0.012368  | 0        | 0.547412 | 2.782925 | 24.5534  | 6.417332 | 7.034856 |
| 10247 | LOC103225 | 8.58308  | 3.563223 | 1.271074 | 2.803317 | 0.005058  | 0.013123  | 0        | 0        | 4.174388 | 15.62489 | 25.66933 | 6.029877 |
| 9982  | ACKR2     | 8.450471 | 3.562415 | 1.243018 | 2.865941 | 0.004158  | 0.011073  | 0        | 0        | 4.174388 | 8.928508 | 23.53022 | 14.06971 |
| 5641  | PEX5L     | 23.43914 | 3.561201 | 0.818029 | 4.353391 | 1.34E-05  | 6.32E-05  | 1.626259 | 0.547412 | 9.044508 | 53.57105 | 57.75599 | 18.08963 |
| 4516  | ISLR      | 21.32754 | 3.560751 | 0.711772 | 5.002655 | 5.65E-07  | 3.33E-06  | 1.626259 | 1.642235 | 6.957314 | 42.41041 | 49.19955 | 26.12947 |
| 8754  | IL17REL   | 9.737848 | 3.560496 | 1.117224 | 3.186912 | 0.001438  | 0.004367  | 0        | 0.547412 | 4.174388 | 17.85702 | 27.80844 | 8.039836 |
| 17844 | LOC119624 | 1.374795 | 3.560158 | 2.59969  | 1.369455 | 0.170857  | 0.254538  | 0        | 0.547412 | 0        | 6.696381 | 0        | 1.004979 |
| 17845 | LOC119615 | 1.374795 | 3.560158 | 2.59969  | 1.369455 | 0.170857  | 0.254538  | 0        | 0.547412 |          |          |          |          |



|       |           |          |          |          |          |           |           |          |          |          |          |          |          |
|-------|-----------|----------|----------|----------|----------|-----------|-----------|----------|----------|----------|----------|----------|----------|
| 593   | HLF       | 154.3509 | 3.55987  | 0.260275 | 13.67735 | 1.39E-42  | 6.22E-41  | 24.93597 | 24.63353 | 22.95914 | 225.4448 | 316.5884 | 311.5436 |
| 17756 | LOC119624 | 1.399515 | 3.559643 | 2.586001 | 1.376505 | 0.168665  | 0.252436  | 0        | 0        | 0.695731 | 6.696381 | 0        | 1.004979 |
| 17766 | GNAT3     | 1.399515 | 3.559643 | 2.586001 | 1.376505 | 0.168665  | 0.252436  | 0        | 0        | 0.695731 | 6.696381 | 0        | 1.004979 |
| 17801 | PRR19     | 1.399515 | 3.559643 | 2.586001 | 1.376505 | 0.168665  | 0.252436  | 0        | 0        | 0.695731 | 6.696381 | 0        | 1.004979 |
| 17809 | KLRF1     | 1.399515 | 3.559643 | 2.586001 | 1.376505 | 0.168665  | 0.252436  | 0        | 0        | 0.695731 | 6.696381 | 0        | 1.004979 |
| 11836 | LOC103226 | 3.850678 | 3.559104 | 1.459053 | 2.439325 | 0.014715  | 0.033051  | 0.542086 | 0.547412 | 0.695731 | 4.464254 | 12.83466 | 4.019918 |
| 10058 | GAPDHS    | 10.05063 | 3.558559 | 1.248865 | 2.849436 | 0.00438   | 0.011575  | 0        | 0        | 4.87012  | 29.01765 | 21.39111 | 5.024897 |
| 10059 | LOC119624 | 10.05063 | 3.558559 | 1.248865 | 2.849436 | 0.00438   | 0.011575  | 0        | 0        | 4.87012  | 29.01765 | 21.39111 | 5.024897 |
| 6778  | ANKFN1    | 18.08566 | 3.556265 | 0.92972  | 3.825094 | 0.000131  | 0.000513  | 0        | 1.094824 | 7.653045 | 33.4819  | 49.19955 | 17.08465 |
| 12525 | TMIGD1    | 3.888593 | 3.556111 | 1.548372 | 2.296677 | 0.021637  | 0.045926  | 0        | 1.094824 | 0.695731 | 6.696381 | 12.83466 | 2.009959 |
| 6345  | ATP1A4    | 22.39315 | 3.556061 | 0.887263 | 4.007899 | 6.13E-05  | 0.000257  | 0        | 1.094824 | 9.740239 | 51.33892 | 47.06043 | 25.12449 |
| 5875  | KCNK3     | 11.36045 | 3.555612 | 0.840866 | 4.22851  | 2.35E-05  | 0.000106  | 1.626259 | 1.642235 | 2.087194 | 22.32127 | 21.39111 | 19.09461 |
| 16880 | LOC119624 | 1.346985 | 3.555223 | 2.355438 | 1.509368 | 0.131205  | 0.206612  | 0        | 0        | 0.695731 | 2.232127 | 2.139111 | 3.014938 |
| 16883 | LOC119624 | 1.346985 | 3.555223 | 2.355438 | 1.509368 | 0.131205  | 0.206612  | 0        | 0        | 0.695731 | 2.232127 | 2.139111 | 3.014938 |
| 16934 | LOC119619 | 1.322265 | 3.555028 | 2.367436 | 1.501636 | 0.133191  | 0.209087  | 0        | 0.547412 | 0        | 2.232127 | 2.139111 | 3.014938 |
| 16935 | LOC103234 | 1.322265 | 3.555028 | 2.367436 | 1.501636 | 0.133191  | 0.209087  | 0        | 0.547412 | 0        | 2.232127 | 2.139111 | 3.014938 |
| 8516  | RNF17     | 8.7353   | 3.554192 | 1.092685 | 3.252715 | 0.001143  | 0.003568  | 2.710432 | 0.547412 | 0.695731 | 15.62489 | 27.80844 | 5.024897 |
| 33    | VAV3      | 1832.028 | 3.55405  | 0.10802  | 32.90192 | 2.06E-237 | 1.66E-234 | 274.8378 | 309.8351 | 277.5968 | 3430.779 | 3227.918 | 3471.199 |
| 42    | CSF1      | 10326.51 | 3.553675 | 0.113002 | 31.44777 | 4.50E-217 | 2.85E-214 | 1470.68  | 1828.903 | 1563.308 | 18542.28 | 17641.25 | 20912.62 |
| 8122  | MFAP4     | 9.761638 | 3.55244  | 1.053396 | 3.372369 | 0.000745  | 0.00244   | 1.626259 | 2.737059 | 0        | 26.78552 | 21.39111 | 6.029877 |
| 11114 | FCRL5     | 5.396789 | 3.552111 | 1.366073 | 2.600236 | 0.009316  | 0.022286  | 0        | 0.547412 | 2.087194 | 4.464254 | 19.252   | 6.029877 |
| 15394 | LOC103234 | 19.00961 | 3.551231 | 2.016911 | 1.760728 | 0.078284  | 0.135195  | 0        | 0        | 9.044508 | 35.71403 | 49.19955 | 20.09959 |
| 11363 | PABPN1L   | 8.595125 | 3.549985 | 1.394712 | 2.545318 | 0.10918   | 0.025542  | 0        | 0        | 4.174388 | 11.16063 | 34.22577 | 2.009959 |
| 4373  | JPH2      | 27.59015 | 3.549693 | 0.696222 | 5.098509 | 3.42E-07  | 2.08E-06  | 3.252518 | 2.189647 | 7.653045 | 44.64254 | 87.70354 | 20.09959 |
| 8792  | SIX6      | 7.888012 | 3.54952  | 1.117641 | 3.175905 | 0.001494  | 0.004517  | 0.542086 | 1.094824 | 2.087194 | 29.01765 | 8.556443 | 6.029877 |
| 16113 | GPR174    | 13.14071 | 3.549145 | 2.159927 | 1.643178 | 0.100346  | 0.165568  | 0        | 0        | 6.261582 | 26.78552 | 42.78221 | 3.014938 |
| 11753 | LOC103244 | 4.808094 | 3.54691  | 1.442981 | 2.458043 | 0.01397   | 0.031599  | 0        | 2.189647 | 0        | 8.928508 | 10.69555 | 7.034856 |
| 9103  | SLC1A6    | 8.211322 | 3.546449 | 1.150454 | 3.082651 | 0.002052  | 0.005992  | 0        | 0.547412 | 3.478657 | 20.08914 | 17.11289 | 8.039836 |
| 9771  | DNAI2     | 8.300881 | 3.546164 | 1.218347 | 2.910636 | 0.003607  | 0.009814  | 0        | 0.547412 | 3.478657 | 26.78552 | 14.97377 | 4.019918 |
| 5804  | SCN11A    | 18.3092  | 3.544199 | 0.829631 | 4.27202  | 1.94E-05  | 8.87E-05  | 0.542086 | 3.284471 | 4.87012  | 33.4819  | 55.61688 | 12.05975 |
| 9707  | TCIM      | 8.269875 | 3.541476 | 1.209864 | 2.92717  | 0.003421  | 0.009368  | 0        | 0.547412 | 3.478657 | 22.32127 | 19.252   | 4.019918 |
| 11142 | LOC103215 | 5.043361 | 3.540783 | 1.365361 | 2.593295 | 0.009506  | 0.022682  | 0        | 1.642235 | 0.695731 | 8.928508 | 14.97377 | 4.019918 |
| 14607 | FCN3      | 2.709472 | 3.540693 | 1.858835 | 1.904792 | 0.056807  | 0.103356  | 0        | 0        | 1.391463 | 6.696381 | 2.139111 | 6.029877 |
| 13091 | NTRK3     | 49.8184  | 3.540648 | 1.617507 | 2.188954 | 0.0286    | 0.058081  | 0        | 2.189647 | 21.56767 | 82.5887  | 143.3204 | 49.24399 |
| 3480  | LOC103224 | 29.30027 | 3.539984 | 0.602249 | 5.877943 | 4.15E-09  | 3.17E-08  | 5.420864 | 1.094824 | 7.653045 | 58.0353  | 51.33866 | 52.25893 |
| 6958  | CNTN4     | 20.79592 | 3.539225 | 0.942997 | 3.753166 | 0.000175  | 0.000667  | 1.084173 | 0        | 9.044508 | 31.24978 | 66.31243 | 17.08465 |
| 8628  | LOC119624 | 7.73733  | 3.539    | 1.098901 | 3.22049  | 0.00128   | 0.003943  | 0        | 1.642235 | 2.087194 | 13.39276 | 19.252   | 10.04979 |
| 17702 | LOC103235 | 1.331482 | 3.538773 | 2.557529 | 1.383669 | 0.16646   | 0.249977  | 0        | 0        | 0.695731 | 0        | 4.278221 | 3.014938 |
| 17703 | LOC103244 | 1.331482 | 3.538773 | 2.557529 | 1.383669 | 0.16646   | 0.249977  | 0        | 0        | 0.695731 | 0        | 4.278221 | 3.014938 |
| 17764 | GHRL      | 1.306762 | 3.538539 | 2.57243  | 1.375563 | 0.168957  | 0.252436  | 0        | 0.547412 | 0        | 0        | 4.278221 | 3.014938 |
| 17776 | LOC119624 | 1.305874 | 3.538531 | 2.572973 | 1.375269 | 0.169048  | 0.252436  | 0.542086 | 0        | 0        | 0        | 4.278221 | 3.014938 |
| 14344 | LOC103230 | 2.47934  | 3.53811  | 1.810991 | 1.953687 | 0.050738  | 0.094041  | 0.542086 | 0        | 0.695731 | 4.464254 | 2.139111 | 7.034856 |
| 9338  | GALNT8    | 7.884555 | 3.537646 | 1.170632 | 3.021996 | 0.002511  | 0.007149  | 0.542086 | 1.094824 | 2.087194 | 22.32127 | 19.252   | 2.009959 |
| 8572  | LOC119614 | 7.427748 | 3.537497 | 1.093312 | 3.23558  | 0.001214  | 0.003765  | 1.626259 | 1.094824 | 0.695731 | 24.5534  | 8.556443 | 8.039836 |
| 9655  | DRD4      | 6.462627 | 3.537481 | 1.200944 | 2.945584 | 0.003223  | 0.008876  | 1.084173 | 0.547412 | 1.391463 | 15.62489 | 17.11289 | 3.014938 |
| 17093 | LOC119624 | 1.359293 | 3.537243 | 2.385559 | 1.482773 | 0.138135  | 0.21483   | 0        | 0.547412 | 0        | 4.464254 | 2.139111 | 1.004979 |
| 17094 | CUNHXorf  | 1.359293 | 3.537243 | 2.385559 | 1.482773 | 0.138135  | 0.21483   | 0        | 0.547412 | 0        | 4.464254 | 2.139111 | 1.004979 |
| 8869  | POM121L1  | 8.008738 | 3.537114 | 1.122524 | 3.151036 | 0.001627  | 0.004877  | 0.542086 | 0.547412 | 2.782925 | 15.62489 | 23.53022 | 5.024897 |
| 17020 | CUNH11or  | 1.384013 | 3.536684 | 2.374109 | 1.489689 | 0.136306  | 0.212795  | 0        | 0        | 0.695731 | 4.464254 | 2.139111 | 1.004979 |
| 17022 | LOC119624 | 1.384013 | 3.536684 | 2.374109 | 1.489689 | 0.136306  | 0.212795  | 0        | 0        | 0.695731 | 4.464254 | 2.139111 | 1.004979 |
| 17023 | WFDC6     | 1.384013 | 3.536684 | 2.374109 | 1.489689 | 0.136306  | 0.212795  | 0        | 0        | 0.695731 | 4.464254 | 2.139111 | 1.004979 |
| 17024 | LOC103224 | 1.384013 | 3.536684 | 2.374109 | 1.489689 | 0.136306  | 0.212795  | 0        | 0        | 0.695731 | 4.464254 | 2.139111 | 1.004979 |
| 17025 | LOC103244 | 1.384013 | 3.536684 | 2.374109 | 1.489689 | 0.136306  | 0.212795  | 0        | 0        | 0.695731 | 4.464254 | 2.139111 | 1.004979 |
| 17026 | LOC103230 | 1.384013 | 3.536684 | 2.374109 | 1.489689 | 0.136306  | 0.212795  | 0        | 0        | 0.695731 | 4.464254 | 2.139111 | 1.004979 |
| 17027 | ASGR2     | 1.384013 | 3.536684 | 2.374109 | 1.489689 | 0.136306  | 0.212795  | 0        | 0        | 0.695731 | 4.464254 | 2.139111 | 1.004979 |
| 17028 | LOC103233 | 1.384013 | 3.536684 | 2.374109 | 1.489689 | 0.136306  | 0.212795  | 0        | 0        | 0.695731 | 4.464254 | 2.139111 | 1.004979 |
| 29    | LOC119624 | 6243.791 | 3.536013 | 0.103009 | 34.32732 | 3.07E-258 | 2.81E-255 | 913.4155 | 1098.656 | 961.5008 | 11008.85 | 11335.15 | 12145.18 |
| 149   | LOC103244 | 457.5171 | 3.535833 | 0.159486 | 22.17022 | 6.66E-109 | 1.19E-106 | 80.22878 | 66.78424 | 70.9646  | 803.5657 | 849.2269 | 874.3321 |
| 14655 | TMEM247   | 2.7465   | 3.535723 | 1.864695 | 1.89614  | 0.057942  | 0.105109  | 0        | 0        | 1.391463 | 8.928508 | 2.139111 | 4.019918 |
| 15437 | DKK2      | 15.90617 | 3.534576 | 2.014688 | 1.754404 | 0.079361  | 0.136673  | 0        | 0        | 7.653045 | 44.64254 | 32.08666 | 11.05477 |
| 14463 | LOC119624 | 2.730997 | 3.53213  | 1.828315 | 1.931905 | 0.053371  | 0.098097  | 0        | 0        | 1.391463 | 6.696381 | 4.278221 | 4.019918 |
| 14464 | LOC119620 | 2.730997 | 3.53213  | 1.828315 | 1.931905 | 0.053371  | 0.098097  | 0        | 0        | 1.391463 | 6.696381 | 4.278221 | 4.019918 |
| 11490 | VPREB3    | 4.797726 | 3.531552 | 1.402176 | 2.518622 | 0.011782  | 0.027259  | 0.542086 | 1.642235 | 0        | 4.464254 | 17.11289 | 5.024897 |
| 64    | PDGFB     | 835.5829 | 3.530363 | 0.129412 | 27.27995 | 7.34E-164 | 3.05E-161 | 142.0266 | 126.4521 | 130.7975 | 1593.739 | 1456.734 | 1563.748 |
| 956   | ABCC6     | 88.25031 | 3.530001 | 0.315704 | 11.18137 | 5.03E-29  | 1.40E-27  | 14.09425 | 15.32753 | 12.52316 | 156.2489 | 177.5462 | 153.7619 |
| 8288  | LOC103214 | 9.074835 | 3.529086 | 1.064061 | 3.316621 | 0.000911  | 0.002922  | 0        | 1.642235 | 2.782925 | 11.16063 | 27.80844 | 11.05477 |
| 6897  | TRPM2     | 12.91995 | 3.528663 | 0.934285 | 3.776858 | 0.000159  | 0.000612  | 0        | 2.737059 | 3.478657 | 35.71403 | 23.53022 | 12.05975 |
| 14669 | LOC119624 | 2.678466 | 3.526853 | 1.862314 | 1.893801 | 0.058251  | 0.10557   | 0        | 0        | 1.391463 | 2.232127 | 6.417332 | 6.029877 |
| 8431  | ADGRD2    | 10.91734 | 3.525488 | 1.077104 | 3.273117 | 0.001064  | 0.003354  | 0        | 0.547412 | 4.87012  | 20.08914 | 29.94755 | 10.04979 |
| 5984  | LINGO1    | 25.80078 | 3.525417 | 0.845218 | 4.171014 | 3.03E-05  | 0.000135  | 0        | 2.189647 | 10.43597 | 58.0353  | 62.03421 | 22.10955 |
| 14492 | LOC103244 | 2.715494 | 3.525225 | 1.829995 | 1.926358 | 0.05406   | 0.09917   | 0        | 0        | 1.391463 | 4.464254 | 6.417332 | 4.019918 |
| 14695 | LOC119624 | 2.768025 | 3.524377 | 1.863789 | 1.890974 | 0.058628  | 0.10605   | 0        | 0        | 1.391463 | 8.928508 | 4.278221 | 2.009959 |
| 14696 | LCN8      | 2.768025 | 3.524377 | 1.863789 | 1.890974 | 0.058628  | 0.10605   | 0        | 0        |          |          |          |          |



|       |           |          |          |          |          |           |           |          |          |          |          |          |          |
|-------|-----------|----------|----------|----------|----------|-----------|-----------|----------|----------|----------|----------|----------|----------|
| 17158 | LOC103236 | 1.342902 | 3.524031 | 2.392143 | 1.473169 | 0.140705  | 0.218012  | 0.542086 | 0        | 0        | 2.232127 | 4.278221 | 1.004979 |
| 17153 | LECT2     | 1.34379  | 3.524012 | 2.391718 | 1.473423 | 0.140637  | 0.217932  | 0        | 0.547412 | 0        | 2.232127 | 4.278221 | 1.004979 |
| 17154 | LOC119627 | 1.34379  | 3.524012 | 2.391718 | 1.473423 | 0.140637  | 0.217932  | 0        | 0.547412 | 0        | 2.232127 | 4.278221 | 1.004979 |
| 17155 | LOC103235 | 1.34379  | 3.524012 | 2.391718 | 1.473423 | 0.140637  | 0.217932  | 0        | 0.547412 | 0        | 2.232127 | 4.278221 | 1.004979 |
| 17156 | LOC103247 | 1.34379  | 3.524012 | 2.391718 | 1.473423 | 0.140637  | 0.217932  | 0        | 0.547412 | 0        | 2.232127 | 4.278221 | 1.004979 |
| 17103 | LOC103236 | 1.36851  | 3.523498 | 2.380071 | 1.480417 | 0.138762  | 0.215617  | 0        | 0        | 0.695731 | 2.232127 | 4.278221 | 1.004979 |
| 17104 | LOC103238 | 1.36851  | 3.523498 | 2.380071 | 1.480417 | 0.138762  | 0.215617  | 0        | 0        | 0.695731 | 2.232127 | 4.278221 | 1.004979 |
| 17105 | LOC103224 | 1.36851  | 3.523498 | 2.380071 | 1.480417 | 0.138762  | 0.215617  | 0        | 0        | 0.695731 | 2.232127 | 4.278221 | 1.004979 |
| 17107 | APOBEC4   | 1.36851  | 3.523498 | 2.380071 | 1.480417 | 0.138762  | 0.215617  | 0        | 0        | 0.695731 | 2.232127 | 4.278221 | 1.004979 |
| 17108 | LOC103227 | 1.36851  | 3.523498 | 2.380071 | 1.480417 | 0.138762  | 0.215617  | 0        | 0        | 0.695731 | 2.232127 | 4.278221 | 1.004979 |
| 17109 | LOC103227 | 1.36851  | 3.523498 | 2.380071 | 1.480417 | 0.138762  | 0.215617  | 0        | 0        | 0.695731 | 2.232127 | 4.278221 | 1.004979 |
| 10239 | PPP1R14D  | 6.683908 | 3.523123 | 1.255779 | 2.805527 | 0.005023  | 0.013043  | 0.542086 | 0        | 2.782925 | 22.32127 | 6.417332 | 8.039836 |
| 14171 | IL1F10    | 2.501753 | 3.519938 | 1.775849 | 1.982116 | 0.047466  | 0.089068  | 0        | 0.547412 | 0.695731 | 4.464254 | 4.278221 | 5.024897 |
| 7036  | ADIPOQ    | 23.65591 | 3.519596 | 0.946336 | 3.719184 | 0.0002    | 0.000755  | 0        | 0.547412 | 11.1317  | 55.80317 | 51.33866 | 23.11453 |
| 12705 | LOC103227 | 4.099507 | 3.519426 | 1.559097 | 2.257349 | 0.023986  | 0.050191  | 0        | 0        | 2.087194 | 8.928508 | 8.556443 | 5.024897 |
| 12669 | TBX5      | 37.58246 | 3.518584 | 1.552255 | 2.266757 | 0.023405  | 0.049114  | 0        | 2.189647 | 16.00182 | 87.05295 | 94.12087 | 26.12947 |
| 18010 | CUNH1orf  | 1.3274   | 3.518005 | 2.623204 | 1.341111 | 0.179885  | 0.265488  | 0.542086 | 0        | 0        | 0        | 6.417332 | 1.004979 |
| 18008 | LOC119627 | 1.328287 | 3.517991 | 2.622678 | 1.341373 | 0.179799  | 0.265421  | 0        | 0.547412 | 0        | 0        | 6.417332 | 1.004979 |
| 18009 | TARM1     | 1.328287 | 3.517991 | 2.622678 | 1.341373 | 0.179799  | 0.265421  | 0        | 0.547412 | 0        | 0        | 6.417332 | 1.004979 |
| 14647 | LOC119627 | 2.752522 | 3.517897 | 1.853998 | 1.897465 | 0.057767  | 0.104849  | 0        | 0        | 1.391463 | 6.696381 | 6.417332 | 2.009959 |
| 17964 | FAM240A   | 1.353007 | 3.517596 | 2.608251 | 1.348642 | 0.177452  | 0.262554  | 0        | 0        | 0.695731 | 0        | 6.417332 | 1.004979 |
| 17965 | LOC119626 | 1.353007 | 3.517596 | 2.608251 | 1.348642 | 0.177452  | 0.262554  | 0        | 0        | 0.695731 | 0        | 6.417332 | 1.004979 |
| 17967 | RNASE7    | 1.353007 | 3.517596 | 2.608251 | 1.348642 | 0.177452  | 0.262554  | 0        | 0        | 0.695731 | 0        | 6.417332 | 1.004979 |
| 17968 | CCL13     | 1.353007 | 3.517596 | 2.608251 | 1.348642 | 0.177452  | 0.262554  | 0        | 0        | 0.695731 | 0        | 6.417332 | 1.004979 |
| 6619  | BNIP5     | 11.13334 | 3.516743 | 0.903236 | 3.893492 | 9.88E-05  | 0.000397  | 1.626259 | 2.189647 | 1.391463 | 29.01765 | 23.53022 | 9.044815 |
| 15347 | LOC103227 | 18.57302 | 3.516293 | 1.985539 | 1.770951 | 0.076569  | 0.132637  | 0        | 0        | 9.044508 | 33.4819  | 42.78221 | 26.12947 |
| 12960 | LOC103236 | 4.136535 | 3.515526 | 1.589714 | 2.21142  | 0.027007  | 0.055399  | 0        | 0        | 2.087194 | 11.16063 | 8.556443 | 3.014938 |
| 14354 | LOC103237 | 2.485362 | 3.515263 | 1.801736 | 1.951043 | 0.051052  | 0.094553  | 0.542086 | 0        | 0.695731 | 2.232127 | 6.417332 | 5.024897 |
| 14762 | LOC103247 | 2.699992 | 3.51468  | 1.869941 | 1.879568 | 0.060167  | 0.108355  | 0        | 0        | 1.391463 | 2.232127 | 8.556443 | 4.019918 |
| 5455  | KASH5     | 16.54448 | 3.513904 | 0.7919   | 4.43731  | 9.11E-06  | 4.44E-05  | 2.168345 | 1.642235 | 4.174388 | 29.01765 | 49.19955 | 13.06473 |
| 8393  | GHRHR     | 7.630957 | 3.511778 | 1.06936  | 3.284001 | 0.001023  | 0.003242  | 0.542086 | 1.094824 | 2.087194 | 22.32127 | 10.69555 | 9.044815 |
| 12287 | LOC119625 | 3.85476  | 3.510942 | 1.495965 | 2.346941 | 0.018928  | 0.040954  | 0        | 0.547412 | 1.391463 | 4.464254 | 10.69555 | 6.029877 |
| 11635 | EF5       | 5.468017 | 3.510812 | 1.41203  | 2.486359 | 0.012906  | 0.029489  | 0        | 0        | 2.782925 | 11.16063 | 12.83466 | 6.029877 |
| 12979 | ZNF750    | 4.121032 | 3.510691 | 1.590386 | 2.207447 | 0.027283  | 0.055884  | 0        | 0        | 2.087194 | 8.928508 | 10.69555 | 3.014938 |
| 12243 | TRNAK-UU  | 3.907291 | 3.510343 | 1.48884  | 2.357771 | 0.018385  | 0.039922  | 0        | 0.547412 | 1.391463 | 8.928508 | 8.556443 | 4.019918 |
| 8682  | LOC103247 | 13.85003 | 3.510304 | 1.09412  | 3.208336 | 0.001335  | 0.004088  | 0        | 0        | 6.957314 | 31.24978 | 27.80844 | 17.08465 |
| 14755 | LOC119626 | 2.73702  | 3.510206 | 1.867109 | 1.880022 | 0.060105  | 0.108273  | 0        | 0        | 1.391463 | 4.464254 | 8.556443 | 2.009959 |
| 14756 | ABRA      | 2.73702  | 3.510206 | 1.867109 | 1.880022 | 0.060105  | 0.108273  | 0        | 0        | 1.391463 | 4.464254 | 8.556443 | 2.009959 |
| 14757 | RTP4      | 2.73702  | 3.510206 | 1.867109 | 1.880022 | 0.060105  | 0.108273  | 0        | 0        | 1.391463 | 4.464254 | 8.556443 | 2.009959 |
| 1271  | NAP1L2    | 93.06323 | 3.510044 | 0.353505 | 9.929257 | 3.11E-23  | 6.50E-22  | 8.131296 | 15.87494 | 21.56767 | 191.9629 | 154.016  | 166.8266 |
| 2295  | NAT8      | 43.20805 | 3.509867 | 0.472774 | 7.423981 | 1.14E-13  | 1.32E-12  | 8.131296 | 7.116354 | 5.565851 | 102.6778 | 51.33866 | 84.41828 |
| 11882 | F5        | 5.335408 | 3.509663 | 1.444918 | 2.42897  | 0.015142  | 0.033878  | 0        | 0        | 2.782925 | 4.464254 | 10.69555 | 14.06971 |
| 8066  | LOC119627 | 8.947824 | 3.509532 | 1.03421  | 3.393441 | 0.00069   | 0.002275  | 0        | 1.642235 | 2.782925 | 20.08914 | 17.11289 | 12.05975 |
| 15164 | LOC119627 | 2.449222 | 3.509266 | 1.946348 | 1.803    | 0.071388  | 0.125155  | 0        | 0.547412 | 0.695731 | 0        | 6.417332 | 7.034856 |
| 15882 | CUNH10orf | 2.78955  | 3.508587 | 2.07883  | 1.68777  | 0.091455  | 0.153088  | 0        | 0        | 1.391463 | 8.928508 | 6.417332 | 0        |
| 6466  | HEATR4    | 12.911   | 3.507988 | 0.887478 | 3.952763 | 7.73E-05  | 0.000318  | 1.626259 | 0.547412 | 4.174388 | 31.24978 | 27.80844 | 12.05975 |
| 14235 | CCDC179   | 2.538781 | 3.50798  | 1.781264 | 1.969377 | 0.04891   | 0.091337  | 0        | 0.547412 | 0.695731 | 6.696381 | 4.278221 | 3.014938 |
| 14236 | LOC119626 | 2.538781 | 3.50798  | 1.781264 | 1.969377 | 0.04891   | 0.091337  | 0        | 0.547412 | 0.695731 | 6.696381 | 4.278221 | 3.014938 |
| 12552 | LOC103237 | 3.760695 | 3.507848 | 1.530045 | 2.292643 | 0.021869  | 0.046317  | 0.542086 | 0.547412 | 0.695731 | 15.62489 | 2.139111 | 3.014938 |
| 10054 | VRTN      | 8.155963 | 3.507717 | 1.230597 | 2.850418 | 0.004366  | 0.011545  | 0        | 0        | 4.174388 | 17.85702 | 12.83466 | 14.06971 |
| 13872 | LOC119626 | 3.981347 | 3.506733 | 1.72265  | 2.035662 | 0.041784  | 0.080078  | 0        | 0.547412 | 1.391463 | 13.39276 | 8.556443 | 0        |
| 8045  | LOC103247 | 10.5671  | 3.506446 | 1.030999 | 3.401018 | 0.000671  | 0.002219  | 0        | 1.094824 | 4.174388 | 24.5534  | 23.53022 | 10.04979 |
| 12306 | LOC103237 | 3.891788 | 3.505468 | 1.49607  | 2.343117 | 0.019123  | 0.041313  | 0        | 0.547412 | 1.391463 | 6.696381 | 10.69555 | 4.019918 |
| 8275  | GZMM      | 10.72229 | 3.505226 | 1.05545  | 3.321072 | 0.000897  | 0.002881  | 0        | 0.547412 | 4.87012  | 22.32127 | 23.53022 | 13.06473 |
| 13104 | LOC119625 | 4.10553  | 3.505106 | 1.602581 | 2.187163 | 0.028731  | 0.058288  | 0        | 0        | 2.087194 | 6.696381 | 12.83466 | 3.014938 |
| 8802  | ZNF648    | 9.359805 | 3.504503 | 1.104426 | 3.173143 | 0.001508  | 0.004555  | 0        | 0.547412 | 4.174388 | 17.85702 | 23.53022 | 10.04979 |
| 10194 | BPIFB3    | 6.628808 | 3.503915 | 1.243849 | 2.816994 | 0.004848  | 0.012642  | 0        | 0.547412 | 2.782925 | 11.16063 | 19.252   | 6.029877 |
| 74    | ZNF292    | 906.4474 | 3.503785 | 0.132439 | 26.45589 | 3.12E-154 | 1.12E-151 | 133.3532 | 166.9606 | 139.842  | 1667.399 | 1674.924 | 1656.206 |
| 3963  | TMEM179   | 28.25839 | 3.503784 | 0.648642 | 5.401723 | 6.60E-08  | 4.43E-07  | 1.626259 | 3.284471 | 9.044508 | 60.26743 | 64.17332 | 31.15436 |
| 14660 | KCNK15    | 2.574921 | 3.502933 | 1.847673 | 1.895862 | 0.057978  | 0.10514   | 0.542086 | 0        | 0.695731 | 8.928508 | 4.278221 | 1.004979 |
| 8125  | TDRD5     | 9.027015 | 3.502607 | 1.03872  | 3.372043 | 0.000746  | 0.002441  | 0.542086 | 1.094824 | 2.782925 | 22.32127 | 21.39111 | 6.029877 |
| 11326 | LOC119626 | 5.297326 | 3.502552 | 1.372607 | 2.551751 | 0.010718  | 0.025159  | 0        | 0.547412 | 2.087194 | 11.16063 | 14.97377 | 3.014938 |
| 4317  | MRO       | 22.83254 | 3.502258 | 0.681022 | 5.142649 | 2.71E-07  | 1.67E-06  | 2.168345 | 2.737059 | 6.261582 | 49.10679 | 55.61688 | 21.10457 |
| 9337  | LOC119627 | 8.892464 | 3.502111 | 1.158761 | 3.02229  | 0.002509  | 0.007143  | 1.084173 | 1.094824 | 2.087194 | 24.5534  | 23.53022 | 1.004979 |
| 12039 | LOC119627 | 35.42409 | 3.501638 | 1.459569 | 2.39909  | 0.016436  | 0.036294  | 0        | 2.737059 | 14.61036 | 62.49956 | 100.5382 | 32.15934 |
| 9230  | LOC103226 | 7.820604 | 3.501479 | 1.149046 | 3.047292 | 0.002309  | 0.006651  | 0        | 1.094824 | 2.782925 | 15.62489 | 21.39111 | 6.029877 |
| 6274  | LOC103227 | 15.72056 | 3.501065 | 0.866433 | 4.040777 | 5.33E-05  | 0.000226  | 1.084173 | 0.547412 | 6.261582 | 24.5534  | 42.78221 | 19.09461 |
| 14289 | FAM181B   | 2.523278 | 3.501    | 1.782707 | 1.963867 | 0.049545  | 0.09218   | 0        | 0.547412 | 0.695731 | 4.464254 | 6.417332 | 3.014938 |
| 15911 | BPIFA2    | 2.774048 | 3.500991 | 2.081018 | 1.682346 | 0.092502  | 0.154547  | 0        | 0        | 1.391463 | 6.696381 | 8.556443 | 0        |
| 15913 | SULT1E1   | 2.774048 | 3.500991 | 2.081018 | 1.682346 | 0.092502  | 0.154547  | 0        | 0        | 1.391463 | 6.696381 | 8.556443 | 0        |
| 15326 | TMEM35A   | 16.97457 | 3.500961 | 1.972631 | 1.774768 | 0.075936  | 0.131722  | 0        | 0        | 8.348776 | 40.17829 | 34.22577 | 19.09461 |
| 15012 | LOC103227 | 2.721517 | 3.500648 | 1.911979 | 1.830903 | 0.067115  | 0.118831  | 0        | 0        | 1.391463 | 2.232127 | 10.69555 | 2.009959 |
| 15013 | TAAR1     | 2.721517 | 3.500648 | 1.911979 | 1.830903 | 0.067115  | 0.118831  | 0        | 0        | 1.391463 | 2.232127 | 10.69555 | 2.009959 |



|       |           |          |          |          |          |          |          |          |          |          |          |          |          |
|-------|-----------|----------|----------|----------|----------|----------|----------|----------|----------|----------|----------|----------|----------|
| 10004 | DUOXA1    | 6.452094 | 3.500597 | 1.224006 | 2.859951 | 0.004237 | 0.01126  | 0        | 1.094824 | 2.087194 | 13.39276 | 17.11289 | 5.024897 |
| 11060 | LOC10324  | 5.135227 | 3.499634 | 1.33924  | 2.613149 | 0.008971 | 0.021564 | 0.542086 | 0.547412 | 1.391463 | 15.62489 | 10.69555 | 2.009959 |
| 14668 | LOC10323  | 2.575809 | 3.499386 | 1.847319 | 1.894305 | 0.058185 | 0.105456 | 0        | 0.547412 | 0.695731 | 8.928508 | 4.278221 | 1.004979 |
| 5915  | AMER2     | 21.17637 | 3.499276 | 0.832433 | 4.203674 | 2.63E-05 | 0.000118 | 0.542086 | 1.642235 | 8.348776 | 49.10679 | 51.33866 | 16.07967 |
| 9324  | LOC11962  | 7.805101 | 3.498807 | 1.156645 | 3.024963 | 0.002487 | 0.007091 | 0        | 1.094824 | 2.782925 | 13.39276 | 23.53022 | 6.029877 |
| 15190 | CD79B     | 2.470747 | 3.497668 | 1.945569 | 1.797761 | 0.072215 | 0.126388 | 0        | 0.547412 | 0.695731 | 0        | 8.556443 | 5.024897 |
| 10615 | CUNH5orf1 | 5.082696 | 3.497635 | 1.287339 | 2.716949 | 0.006589 | 0.016501 | 0.542086 | 0.547412 | 1.391463 | 11.16063 | 12.83466 | 4.019918 |
| 10218 | KRT35     | 9.476911 | 3.497029 | 1.243879 | 2.811389 | 0.004933 | 0.012834 | 0        | 0.547412 | 4.174388 | 22.32127 | 27.80844 | 2.009959 |
| 11620 | LOC10324  | 4.957626 | 3.497015 | 1.404871 | 2.489208 | 0.012803 | 0.029291 | 1.084173 | 0.547412 | 0.695731 | 17.85702 | 8.556443 | 1.004979 |
| 7941  | CSF3R     | 14.93288 | 3.496917 | 1.020701 | 3.425997 | 0.000613 | 0.002051 | 0        | 0.547412 | 6.957314 | 37.94616 | 32.08666 | 12.05975 |
| 9279  | PAK5      | 6.184934 | 3.496314 | 1.151037 | 3.037535 | 0.002385 | 0.006834 | 0.542086 | 1.094824 | 1.391463 | 8.928508 | 17.11289 | 8.039836 |
| 8934  | PTPRT     | 10.77137 | 3.495617 | 1.114582 | 3.136259 | 0.001711 | 0.005092 | 0        | 0.547412 | 4.87012  | 20.08914 | 32.08666 | 7.034856 |
| 12696 | LOC11962  | 3.913313 | 3.495506 | 1.546585 | 2.260144 | 0.023812 | 0.049862 | 0        | 0.547412 | 1.391463 | 6.696381 | 12.83466 | 2.009959 |
| 7704  | KY        | 8.562503 | 3.495403 | 1.001074 | 3.491655 | 0.00048  | 0.001656 | 0.542086 | 2.189647 | 1.391463 | 20.08914 | 17.11289 | 10.04979 |
| 9097  | TSPAN32   | 12.35105 | 3.49432  | 1.132979 | 3.084189 | 0.002041 | 0.005965 | 0        | 0        | 6.261582 | 31.24978 | 23.53022 | 13.06473 |
| 14514 | LOC10324  | 2.507775 | 3.49387  | 1.818706 | 1.921075 | 0.054722 | 0.100234 | 0        | 0.547412 | 0.695731 | 2.232127 | 8.556443 | 3.014938 |
| 8054  | LOC11962  | 13.46533 | 3.493563 | 1.028064 | 3.398195 | 0.000678 | 0.002239 | 0        | 0.547412 | 6.261582 | 24.5534  | 36.36488 | 13.06473 |
| 9467  | LOC10322  | 8.969251 | 3.493259 | 1.166796 | 2.99389  | 0.002754 | 0.007734 | 1.626259 | 0        | 2.782925 | 11.16063 | 34.22577 | 4.019918 |
| 11535 | IKZF3     | 5.105109 | 3.492894 | 1.393398 | 2.506745 | 0.012185 | 0.028083 | 0        | 1.094824 | 1.391463 | 11.16063 | 14.97377 | 2.009959 |
| 12882 | SYNPR     | 3.89781  | 3.490643 | 1.570926 | 2.222029 | 0.026281 | 0.054233 | 0        | 0.547412 | 1.391463 | 4.464254 | 14.97377 | 2.009959 |
| 12883 | LOC11962  | 3.89781  | 3.490643 | 1.570926 | 2.222029 | 0.026281 | 0.054233 | 0        | 0.547412 | 1.391463 | 4.464254 | 14.97377 | 2.009959 |
| 4755  | LOC10322  | 29.70803 | 3.490587 | 0.721087 | 4.840728 | 1.29E-06 | 7.23E-06 | 1.084173 | 3.284471 | 10.43597 | 40.17829 | 94.12087 | 29.1444  |
| 7148  | LOC10323  | 15.73438 | 3.4898   | 0.948056 | 3.681007 | 0.000232 | 0.000864 | 0        | 1.642235 | 6.261582 | 20.08914 | 51.33866 | 15.07469 |
| 15343 | LOC10321  | 2.491385 | 3.489146 | 1.96906  | 1.771986 | 0.076397 | 0.132374 | 0.542086 | 0        | 0.695731 | 0        | 10.69555 | 3.014938 |
| 13721 | SLCO1B7   | 3.53836  | 3.489002 | 1.688664 | 2.066132 | 0.038816 | 0.075197 | 0        | 1.642235 | 0        | 11.16063 | 6.417332 | 2.009959 |
| 12112 | TEKT3     | 3.714186 | 3.488444 | 1.463482 | 2.383661 | 0.017141 | 0.037624 | 0.542086 | 0.547412 | 0.695731 | 8.928508 | 8.556443 | 3.014938 |
| 14725 | GSC2      | 2.543916 | 3.48827  | 1.850965 | 1.884568 | 0.059488 | 0.107402 | 0.542086 | 0        | 0.695731 | 4.464254 | 8.556443 | 1.004979 |
| 15288 | LOC10323  | 2.292258 | 3.488227 | 1.957721 | 1.781779 | 0.074785 | 0.130048 | 1.084173 | 0        | 0        | 2.232127 | 6.417332 | 4.019918 |
| 7777  | LOC10321  | 10.71587 | 3.487975 | 1.004904 | 3.470952 | 0.000519 | 0.001773 | 2.710432 | 1.642235 | 0.695731 | 17.85702 | 36.36488 | 5.024897 |
| 10832 | LOC11962  | 6.067661 | 3.48792  | 1.30932  | 2.663918 | 0.007724 | 0.018956 | 0        | 2.189647 | 0.695731 | 13.39276 | 17.11289 | 3.014938 |
| 15129 | LOC10323  | 2.309536 | 3.487155 | 1.927243 | 1.809401 | 0.070389 | 0.123689 | 0        | 1.094824 | 0        | 4.464254 | 4.278221 | 4.019918 |
| 246   | PTK2B     | 304.8116 | 3.486956 | 0.187782 | 18.56918 | 5.71E-77 | 6.17E-75 | 53.66655 | 43.79295 | 52.87558 | 551.3354 | 526.2212 | 600.9777 |
| 12770 | ZNF781    | 3.515947 | 3.486806 | 1.551747 | 2.247019 | 0.024639 | 0.051294 | 0.542086 | 1.094824 | 0        | 11.16063 | 4.278221 | 4.019918 |
| 5884  | GPD1      | 20.12981 | 3.485872 | 0.825635 | 4.222048 | 2.42E-05 | 0.000109 | 0        | 4.379295 | 5.565851 | 42.41041 | 51.33866 | 17.08465 |
| 14738 | CALY      | 2.544803 | 3.484714 | 1.850612 | 1.883006 | 0.0597   | 0.107681 | 0        | 0.547412 | 0.695731 | 4.464254 | 8.556443 | 1.004979 |
| 7414  | LTF       | 11.54835 | 3.484442 | 0.969216 | 3.595114 | 0.000324 | 0.001163 | 0        | 1.642235 | 4.174388 | 29.01765 | 21.39111 | 13.06473 |
| 11106 | LOC10321  | 4.654325 | 3.483897 | 1.337997 | 2.603815 | 0.009219 | 0.022068 | 1.084173 | 1.094824 | 0        | 11.16063 | 8.556443 | 6.029877 |
| 4337  | TMEM196   | 38.95633 | 3.482834 | 0.679193 | 5.127903 | 2.93E-07 | 1.80E-06 | 1.084173 | 3.831883 | 14.61036 | 69.19594 | 104.8164 | 40.19918 |
| 14239 | SHISAL2A  | 4.096049 | 3.482345 | 1.768438 | 1.969165 | 0.048934 | 0.091363 | 0        | 0        | 2.087194 | 2.232127 | 19.252   | 1.004979 |
| 3095  | YPEL4     | 29.6682  | 3.481789 | 0.553839 | 6.286642 | 3.24E-10 | 2.79E-09 | 3.794605 | 7.116354 | 3.478657 | 69.19594 | 49.19955 | 45.22408 |
| 16391 | CUNH1orf1 | 2.352587 | 3.481601 | 2.190595 | 1.58934  | 0.111984 | 0.181629 | 0        | 1.094824 | 0        | 4.464254 | 8.556443 | 0        |
| 7296  | SLC22A7   | 12.90738 | 3.479796 | 0.957067 | 3.635895 | 0.000277 | 0.001009 | 0        | 1.642235 | 4.87012  | 26.78552 | 32.08666 | 12.05975 |
| 14631 | LOC10324  | 189.2441 | 3.479711 | 1.83024  | 1.901233 | 0.057272 | 0.104064 | 0        | 9.306001 | 84.1835  | 314.7299 | 543.3341 | 183.9112 |
| 4460  | NTRK2     | 26.60077 | 3.479419 | 0.690972 | 5.035547 | 4.76E-07 | 2.84E-06 | 0.542086 | 3.831883 | 9.044508 | 49.10679 | 59.8951  | 37.18424 |
| 14743 | GMP12     | 2.293146 | 3.479414 | 1.848704 | 1.882083 | 0.059825 | 0.10787  | 0.542086 | 0.547412 | 0        | 2.232127 | 6.417332 | 4.019918 |
| 14744 | POMC      | 2.293146 | 3.479414 | 1.848704 | 1.882083 | 0.059825 | 0.10787  | 0.542086 | 0.547412 | 0        | 2.232127 | 6.417332 | 4.019918 |
| 15744 | LOC11962  | 2.367202 | 3.47856  | 2.035066 | 1.709311 | 0.087393 | 0.147571 | 0.542086 | 0.547412 | 0        | 6.696381 | 6.417332 | 0        |
| 8493  | LOC10321  | 10.41936 | 3.477627 | 1.067542 | 3.257603 | 0.001124 | 0.003517 | 1.084173 | 0        | 4.174388 | 24.5534  | 25.66933 | 7.034856 |
| 357   | LOC11962  | 366.859  | 3.477264 | 0.213636 | 16.2766  | 1.45E-59 | 1.08E-57 | 72.09749 | 47.07742 | 62.61582 | 743.2983 | 528.3603 | 747.7047 |
| 7965  | MAGEA9    | 11.75261 | 3.477045 | 1.016479 | 3.420677 | 0.000625 | 0.002085 | 0        | 1.094824 | 4.87012  | 24.5534  | 29.94755 | 10.04979 |
| 7802  | PLG       | 14.69133 | 3.476637 | 1.00344  | 3.464717 | 0.000531 | 0.001809 | 0        | 0.547412 | 6.957314 | 33.4819  | 32.08666 | 15.07469 |
| 8922  | LOC11961  | 7.677202 | 3.476546 | 1.107558 | 3.138929 | 0.001696 | 0.005053 | 0.542086 | 0.547412 | 2.782925 | 22.32127 | 12.83466 | 7.034856 |
| 10022 | KLK13     | 6.396735 | 3.474323 | 1.21646  | 2.856094 | 0.004289 | 0.011377 | 0        | 0.547412 | 2.782925 | 11.16063 | 12.83466 | 11.05477 |
| 6541  | LOC10323  | 12.18147 | 3.473614 | 0.885266 | 3.923807 | 8.72E-05 | 0.000354 | 2.168345 | 1.642235 | 2.087194 | 33.4819  | 25.66933 | 8.039836 |
| 3295  | LOC11962  | 30.90362 | 3.473011 | 0.574502 | 6.045258 | 1.49E-09 | 1.20E-08 | 4.336691 | 2.189647 | 9.044508 | 64.73168 | 59.8951  | 45.22408 |
| 15299 | RXFP2     | 2.331061 | 3.472492 | 1.951382 | 1.779504 | 0.075157 | 0.1306   | 0        | 1.094824 | 0        | 4.464254 | 6.417332 | 2.009959 |
| 3368  | LOC10323  | 39.62291 | 3.471407 | 0.581374 | 5.971037 | 2.36E-09 | 1.86E-08 | 2.710432 | 6.568942 | 10.43597 | 75.89232 | 106.9555 | 35.17428 |
| 10189 | MPZL2     | 6.469903 | 3.471403 | 1.231903 | 2.817919 | 0.004834 | 0.012612 | 0.542086 | 0        | 2.782925 | 15.62489 | 12.83466 | 7.034856 |
| 5762  | LOC10323  | 17.91922 | 3.471346 | 0.808404 | 4.294072 | 1.75E-05 | 8.09E-05 | 0.542086 | 1.642235 | 6.957314 | 33.4819  | 42.78221 | 22.10955 |
| 10252 | TP53TG5   | 7.951439 | 3.470896 | 1.239241 | 2.800823 | 0.005097 | 0.013218 | 0        | 0        | 4.174388 | 15.62489 | 12.83466 | 15.07469 |
| 7291  | LOC11962  | 14.03193 | 3.470529 | 0.954183 | 3.637172 | 0.000276 | 0.001005 | 1.084173 | 1.094824 | 4.87012  | 15.62489 | 53.47777 | 8.039836 |
| 10436 | LOC11962  | 6.506932 | 3.469    | 1.257569 | 2.758496 | 0.005807 | 0.014792 | 0.542086 | 0        | 2.782925 | 17.85702 | 12.83466 | 5.024897 |
| 9270  | SHISA6    | 12.16805 | 3.468986 | 1.141018 | 3.040255 | 0.002364 | 0.006779 | 0        | 0        | 6.261582 | 29.01765 | 25.66933 | 12.05975 |
| 6960  | LOC10322  | 11.05274 | 3.467992 | 0.924043 | 3.753062 | 0.000175 | 0.000667 | 1.626259 | 1.094824 | 2.782925 | 13.39276 | 36.36488 | 11.05477 |
| 9439  | LOC10323  | 6.240659 | 3.467698 | 1.156209 | 2.999195 | 0.002707 | 0.007624 | 0.542086 | 0.547412 | 2.087194 | 13.39276 | 12.83466 | 8.039836 |
| 11224 | KCNJ6     | 8.142601 | 3.466063 | 1.345893 | 2.575289 | 0.010016 | 0.023723 | 0        | 0        | 4.174388 | 24.5534  | 17.11289 | 3.014938 |
| 6144  | LOC10321  | 19.34193 | 3.464989 | 0.845155 | 4.099829 | 4.13E-05 | 0.000179 | 1.084173 | 1.094824 | 7.653045 | 31.24978 | 59.8951  | 15.07469 |
| 6501  | LOC10322  | 15.38646 | 3.462612 | 0.878834 | 3.940007 | 8.15E-05 | 0.000333 | 0.542086 | 1.094824 | 6.261582 | 24.5534  | 42.78221 | 17.08465 |
| 12051 | LOC10322  | 5.331526 | 3.461817 | 1.444167 | 2.397103 | 0.016525 | 0.036455 | 0        | 0        | 2.782925 | 15.62489 | 8.556443 | 5.024897 |
| 10490 | LOC11962  | 8.000512 | 3.461716 | 1.260244 | 2.746861 | 0.006017 | 0.015249 | 0        | 0        | 4.174388 | 13.39276 | 21.39111 | 9.044815 |
| 9237  | LOC10321  | 12.04749 | 3.460676 | 1.136255 | 3.045685 | 0.002322 | 0.006682 | 0        | 0        | 6.261582 | 17.85702 | 32.08666 | 16.07967 |
| 12600 | LOC10322  | 3.658828 | 3.46063  | 1.515439 | 2.283582 | 0.022396 | 0.047254 | 0.542086 | 0        | 1.391463 | 6.       |          |          |



|       |           |          |          |          |          |           |           |          |          |          |          |          |          |
|-------|-----------|----------|----------|----------|----------|-----------|-----------|----------|----------|----------|----------|----------|----------|
| 7350  | PLAAT4    | 12.93121 | 3.459324 | 0.956626 | 3.616173 | 0.000299  | 0.001081  | 0.542086 | 0.547412 | 5.565851 | 26.78552 | 32.08666 | 12.05975 |
| 11580 | LOC103222 | 6.55087  | 3.458635 | 1.384046 | 2.49893  | 0.012457  | 0.028598  | 0        | 0.547412 | 2.782925 | 17.85702 | 17.11289 | 1.004979 |
| 9036  | DMRTA2    | 7.292769 | 3.458396 | 1.114339 | 3.103539 | 0.001912  | 0.005626  | 0.542086 | 1.642235 | 1.391463 | 22.32127 | 12.83466 | 5.024897 |
| 10165 | SLC5A9    | 7.798815 | 3.456861 | 1.224769 | 2.822461 | 0.004766  | 0.012464  | 0        | 0.547412 | 3.478657 | 8.928508 | 27.80844 | 6.029877 |
| 13547 | LOC103233 | 3.941491 | 3.455379 | 1.646292 | 2.098886 | 0.035827  | 0.070308  | 0        | 0        | 2.087194 | 13.39276 | 2.139111 | 6.029877 |
| 12574 | AQP4      | 3.696743 | 3.453196 | 1.508495 | 2.289166 | 0.02207   | 0.046662  | 0        | 0.547412 | 1.391463 | 8.928508 | 4.278221 | 7.034856 |
| 3320  | LOC103233 | 30.182   | 3.452476 | 0.573211 | 6.023044 | 1.71E-09  | 1.37E-08  | 2.710432 | 7.116354 | 5.565851 | 35.71403 | 55.61688 | 74.36848 |
| 8089  | ARR3      | 10.12103 | 3.451572 | 1.020127 | 3.383474 | 0.000716  | 0.002352  | 0        | 1.094824 | 4.174388 | 17.85702 | 23.53022 | 14.06971 |
| 10238 | ARSH      | 7.591096 | 3.451522 | 1.229986 | 2.806147 | 0.005014  | 0.013019  | 0        | 1.094824 | 2.782925 | 6.696381 | 29.94755 | 5.024897 |
| 11394 | LOC119623 | 5.108304 | 3.451232 | 1.359527 | 2.538553 | 0.011131  | 0.025972  | 0        | 0.547412 | 2.087194 | 11.16063 | 12.83466 | 4.019918 |
| 12976 | ZBP1      | 3.749274 | 3.450119 | 1.56279  | 2.207667 | 0.027268  | 0.055865  | 0        | 0.547412 | 1.391463 | 13.39276 | 2.139111 | 5.024897 |
| 8714  | MMP25     | 7.192843 | 3.449488 | 1.078485 | 3.198458 | 0.001382  | 0.004215  | 1.084173 | 1.094824 | 1.391463 | 11.16063 | 21.39111 | 7.034856 |
| 11215 | LOC103240 | 4.910065 | 3.448652 | 1.337767 | 2.577917 | 0.00994   | 0.023562  | 0        | 1.094824 | 1.391463 | 13.39276 | 8.556443 | 5.024897 |
| 7243  | LOC119626 | 9.802852 | 3.448551 | 0.943617 | 3.654608 | 0.000258  | 0.000945  | 1.084173 | 1.094824 | 2.782925 | 24.5534  | 19.252   | 10.04979 |
| 13239 | LOC119615 | 3.947513 | 3.44844  | 1.597174 | 2.159088 | 0.030843  | 0.061936  | 0        | 0        | 2.087194 | 11.16063 | 6.417332 | 4.019918 |
| 9684  | CUNH19or  | 6.06908  | 3.44819  | 1.174594 | 2.935643 | 0.003329  | 0.009138  | 1.084173 | 0.547412 | 1.391463 | 13.39276 | 14.97377 | 5.024897 |
| 10751 | LOC103243 | 4.65752  | 3.44744  | 1.286855 | 2.678965 | 0.007385  | 0.018262  | 1.084173 | 0.547412 | 0.695731 | 11.16063 | 6.417332 | 8.039836 |
| 70    | GPRIN3    | 1839.238 | 3.447124 | 0.128891 | 26.74445 | 1.43E-157 | 5.44E-155 | 264.5381 | 361.8392 | 300.556  | 3283.459 | 3332.734 | 3492.304 |
| 5790  | CUX2      | 19.38001 | 3.446363 | 0.805195 | 4.28016  | 1.87E-05  | 8.58E-05  | 0        | 4.926706 | 4.87012  | 46.87467 | 38.50399 | 21.10457 |
| 556   | CUNH11or  | 156.5895 | 3.446255 | 0.244291 | 14.10719 | 3.43E-45  | 1.64E-43  | 27.6464  | 28.46541 | 22.2634  | 287.9444 | 305.8928 | 267.3245 |
| 13246 | LOC103247 | 3.786302 | 3.44596  | 1.59659  | 2.158326 | 0.030903  | 0.062022  | 0        | 0.547412 | 1.391463 | 15.62489 | 2.139111 | 3.014938 |
| 8326  | CHI3L2    | 8.757651 | 3.443717 | 1.041602 | 3.306173 | 0.000946  | 0.00302   | 0.542086 | 0.547412 | 3.478657 | 13.39276 | 23.53022 | 11.05477 |
| 9282  | LOC119623 | 7.450265 | 3.443617 | 1.133849 | 3.037103 | 0.002389  | 0.006842  | 1.084173 | 0        | 2.782925 | 20.08914 | 10.69555 | 10.04979 |
| 9063  | LOC103233 | 3.903286 | 3.442915 | 1.113494 | 3.091992 | 0.001988  | 0.005832  | 0        | 0.547412 | 4.174388 | 17.85702 | 21.39111 | 10.04979 |
| 10506 | LOC103233 | 6.03985  | 3.442903 | 1.255008 | 2.743331 | 0.006082  | 0.01539   | 0        | 1.642235 | 1.391463 | 8.928508 | 19.252   | 5.024897 |
| 8255  | LANCL3    | 10.76372 | 3.44215  | 1.034421 | 3.327612 | 0.000876  | 0.002821  | 0        | 3.284471 | 2.087194 | 20.08914 | 32.08666 | 7.034856 |
| 11065 | LOC119623 | 4.930702 | 3.441539 | 1.317297 | 2.612576 | 0.008986  | 0.021591  | 0.542086 | 0.547412 | 1.391463 | 13.39276 | 10.69555 | 3.014938 |
| 128   | LRR4C     | 535.6355 | 3.441365 | 0.148825 | 23.1236  | 2.68E-118 | 5.57E-116 | 83.4813  | 100.1764 | 86.96642 | 984.368  | 983.9909 | 974.8301 |
| 9838  | NEFH      | 7.701922 | 3.440752 | 1.187349 | 2.897844 | 0.003757  | 0.010153  | 0.542086 | 0        | 3.478657 | 22.32127 | 12.83466 | 7.034856 |
| 7489  | KCNQ2     | 15.33093 | 3.440538 | 0.9646   | 3.566804 | 0.000361  | 0.001283  | 0        | 1.642235 | 6.261582 | 31.24978 | 42.78221 | 10.04979 |
| 8600  | FAM9C     | 10.09604 | 3.440256 | 1.065398 | 3.22908  | 0.001242  | 0.003839  | 0        | 1.094824 | 4.174388 | 11.16063 | 32.08666 | 12.05975 |
| 88    | TSPAN18   | 1177.492 | 3.439073 | 0.13728  | 25.05146 | 1.68E-138 | 5.08E-136 | 183.2252 | 236.4819 | 176.02   | 2140.61  | 2083.494 | 2245.124 |
| 12765 | CKMT2     | 3.754409 | 3.438462 | 1.529798 | 2.247658 | 0.024598  | 0.051229  | 0.542086 | 0        | 1.391463 | 11.16063 | 6.417332 | 3.014938 |
| 13288 | LOC103233 | 3.916508 | 3.438415 | 1.598639 | 2.150839 | 0.031489  | 0.063     | 0        | 0        | 2.087194 | 6.696381 | 10.69555 | 4.019918 |
| 12332 | FAM178B   | 3.451109 | 3.438195 | 1.470549 | 2.338034 | 0.019385  | 0.041791  | 0.542086 | 0.547412 | 0.695731 | 4.464254 | 6.417332 | 8.039836 |
| 11519 | LOC119623 | 4.916087 | 3.438109 | 1.370185 | 2.509229 | 0.0121    | 0.027924  | 0        | 1.094824 | 1.391463 | 11.16063 | 12.83466 | 3.014938 |
| 9993  | LOC119623 | 10.62257 | 3.437241 | 1.200558 | 2.863036 | 0.004196  | 0.011163  | 0        | 0        | 5.565851 | 22.32127 | 27.80844 | 8.039836 |
| 8874  | LOC103247 | 8.743036 | 3.437008 | 1.09132  | 3.149405 | 0.001636  | 0.004901  | 0        | 1.094824 | 3.478657 | 11.16063 | 25.66933 | 11.05477 |
| 8712  | ACP7      | 8.618853 | 3.436548 | 1.074265 | 3.198977 | 0.001379  | 0.004209  | 0        | 1.642235 | 2.782925 | 17.85702 | 21.39111 | 8.039836 |
| 9363  | LOC103243 | 8.890261 | 3.436511 | 1.139593 | 3.015561 | 0.002565  | 0.007283  | 0.542086 | 0.547412 | 3.478657 | 20.08914 | 25.66933 | 3.014938 |
| 6340  | GUCY2F    | 19.02244 | 3.435746 | 0.856909 | 4.009465 | 6.09E-05  | 0.000255  | 1.084173 | 1.094824 | 7.653045 | 33.4819  | 57.75599 | 13.06473 |
| 15091 | ZBTB16    | 52.97001 | 3.434954 | 1.889502 | 1.817915 | 0.069077  | 0.121689  | 0        | 0.547412 | 26.43779 | 102.6778 | 136.9031 | 51.25395 |
| 9663  | LOC119615 | 7.618386 | 3.434654 | 1.167285 | 2.94243  | 0.003256  | 0.008959  | 0.542086 | 0        | 3.478657 | 13.39276 | 19.252   | 9.044815 |
| 13569 | NLRP4     | 3.953536 | 3.434542 | 1.639505 | 2.094866 | 0.036183  | 0.070889  | 0        | 0        | 2.087194 | 8.928508 | 10.69555 | 2.009959 |
| 5365  | FOX1      | 32.93869 | 3.433765 | 0.766144 | 4.481878 | 7.40E-06  | 3.67E-05  | 3.252518 | 0.547412 | 13.2189  | 44.64254 | 104.8164 | 31.15436 |
| 10650 | FFAR3     | 7.879524 | 3.432751 | 1.269093 | 2.704885 | 0.006833  | 0.017056  | 0        | 0        | 4.174388 | 20.08914 | 14.97377 | 8.039836 |
| 13464 | CRYBB1    | 3.901005 | 3.431529 | 1.6232   | 2.114052 | 0.034511  | 0.068137  | 0        | 0        | 2.087194 | 4.464254 | 12.83466 | 4.019918 |
| 13465 | CCDC196   | 3.901005 | 3.431529 | 1.6232   | 2.114052 | 0.034511  | 0.068137  | 0        | 0        | 2.087194 | 4.464254 | 12.83466 | 4.019918 |
| 1001  | CREG2     | 107.1096 | 3.431528 | 0.312383 | 10.98499 | 4.51E-28  | 1.20E-26  | 21.14137 | 13.6853  | 20.17621 | 194.195  | 158.2942 | 235.1652 |
| 11291 | GPR35     | 4.884194 | 3.431062 | 1.340255 | 2.560006 | 0.010467  | 0.024641  | 0.542086 | 0.547412 | 1.391463 | 6.696381 | 17.11289 | 3.014938 |
| 12730 | LOC103243 | 3.739794 | 3.431051 | 1.523707 | 2.25178  | 0.024336  | 0.050823  | 0        | 0.547412 | 1.391463 | 8.928508 | 8.556443 | 3.014938 |
| 5707  | SV2B      | 15.18384 | 3.430908 | 0.793618 | 4.323122 | 1.54E-05  | 7.17E-05  | 4.336691 | 0.547412 | 2.782925 | 31.24978 | 32.08666 | 20.09959 |
| 154   | PDZRN3    | 438.9367 | 3.430838 | 0.156923 | 21.86323 | 5.82E-106 | 1.00E-103 | 70.47123 | 78.8273  | 74.44326 | 772.3159 | 806.4447 | 831.118  |
| 6606  | MAGEC1    | 21.5606  | 3.430811 | 0.87969  | 3.900022 | 9.62E-05  | 0.000387  | 0        | 2.189647 | 9.044508 | 24.5534  | 68.45154 | 25.12449 |
| 8601  | ASCL4     | 14.16669 | 3.429228 | 1.062105 | 3.228709 | 0.001244  | 0.003844  | 0        | 1.094824 | 6.261582 | 24.5534  | 47.06043 | 6.029877 |
| 13657 | ZNFS44    | 3.938033 | 3.428849 | 1.651289 | 2.076468 | 0.037851  | 0.073681  | 0        | 0        | 2.087194 | 6.696381 | 12.83466 | 2.009959 |
| 7741  | LOC103223 | 13.74737 | 3.428237 | 0.984857 | 3.480948 | 0.0005    | 0.001716  | 0.542086 | 1.642235 | 4.87012  | 46.87467 | 23.53022 | 5.024897 |
| 10946 | LOC119618 | 4.648927 | 3.428206 | 1.298695 | 2.639732 | 0.008297  | 0.020152  | 0.542086 | 1.094824 | 0.695731 | 6.696381 | 12.83466 | 6.029877 |
| 6268  | ABCA9     | 13.77557 | 3.425862 | 0.847319 | 4.043177 | 5.27E-05  | 0.000224  | 3.794605 | 1.642235 | 1.391463 | 44.64254 | 17.11289 | 14.06971 |
| 8698  | KCNMB3    | 9.955046 | 3.424678 | 1.068854 | 3.204065 | 0.001355  | 0.004142  | 0.542086 | 1.094824 | 3.478657 | 33.4819  | 17.11289 | 4.019918 |
| 15218 | LOC103233 | 2.489445 | 3.424579 | 1.91074  | 1.792279 | 0.073088  | 0.127665  | 0        | 0        | 1.391463 | 2.232127 | 4.278221 | 7.034856 |
| 15219 | DACH2     | 2.489445 | 3.424579 | 1.91074  | 1.792279 | 0.073088  | 0.127665  | 0        | 0        | 1.391463 | 2.232127 | 4.278221 | 7.034856 |
| 15009 | LOC119626 | 2.526473 | 3.424366 | 1.869478 | 1.831723 | 0.066993  | 0.118646  | 0        | 0        | 1.391463 | 4.464254 | 4.278221 | 5.024897 |
| 15010 | TMEM238   | 2.526473 | 3.424366 | 1.869478 | 1.831723 | 0.066993  | 0.118646  | 0        | 0        | 1.391463 | 4.464254 | 4.278221 | 5.024897 |
| 15011 | HPD       | 2.526473 | 3.424366 | 1.869478 | 1.831723 | 0.066993  | 0.118646  | 0        | 0        | 1.391463 | 4.464254 | 4.278221 | 5.024897 |
| 11198 | LOC103233 | 6.39993  | 3.424143 | 1.325819 | 2.582662 | 0.009804  | 0.023276  | 0        | 0        | 3.478657 | 11.16063 | 10.69555 | 13.06473 |
| 5183  | MYT1L     | 30.11916 | 3.42387  | 0.746281 | 4.487909 | 4.48E-06  | 2.30E-05  | 0.542086 | 3.284471 | 11.82743 | 75.89232 | 62.03421 | 27.13445 |
| 10527 | GRM3      | 9.17052  | 3.423742 | 1.250235 | 2.738479 | 0.006172  | 0.015587  | 0        | 0        | 4.87012  | 11.16063 | 29.94755 | 9.044815 |
| 12818 | LOC119618 | 3.524277 | 3.423693 | 1.531985 | 2.234808 | 0.02543   | 0.052743  | 1.084173 | 0        | 0.695731 | 8.928508 | 6.417332 | 4.019918 |
| 7463  | TMPRSS6   | 11.82239 | 3.423633 | 0.957388 | 3.576013 | 0.000349  | 0.001243  | 1.626259 | 2.189647 | 2.087194 | 26.78552 | 34.22577 | 4.019918 |
| 10185 | REN       | 7.608906 | 3.423392 | 1.214569 | 2.818607 | 0.004823  | 0.01259   | 0.542086 | 0        | 3.478657 | 8.928508 | 25.66933 | 7.034856 |
| 13849 | LOC119623 | 3.92253  | 3.422393 | 1.677151 | 2.040599 | 0.041291  | 0.079263  | 0        | 0        | 2.087194 | 4.46425  |          |          |



|       |           |          |          |          |          |          |          |          |          |          |          |          |          |
|-------|-----------|----------|----------|----------|----------|----------|----------|----------|----------|----------|----------|----------|----------|
| 8391  | STRA6     | 12.69961 | 3.42218  | 1.041949 | 3.284403 | 0.001022 | 0.003238 | 0        | 1.094824 | 5.565851 | 44.64254 | 12.83466 | 12.05975 |
| 11173 | LOC103225 | 6.421455 | 3.421893 | 1.323011 | 2.586443 | 0.009697 | 0.023074 | 0        | 0        | 3.478657 | 11.16063 | 12.83466 | 11.05477 |
| 9464  | SCNN1G    | 7.234841 | 3.421068 | 1.142594 | 2.994123 | 0.002752 | 0.007731 | 0        | 1.642235 | 2.087194 | 13.39276 | 19.252   | 7.034856 |
| 9465  | LILRA4    | 7.234841 | 3.421068 | 1.142594 | 2.994123 | 0.002752 | 0.007731 | 0        | 1.642235 | 2.087194 | 13.39276 | 19.252   | 7.034856 |
| 9565  | LOC119618 | 6.965018 | 3.42092  | 1.152385 | 2.968557 | 0.002992 | 0.008316 | 2.168345 | 0        | 1.391463 | 8.928508 | 19.252   | 10.04979 |
| 3770  | DLGAP2    | 53.43514 | 3.420037 | 0.61359  | 5.573816 | 2.49E-08 | 1.76E-07 | 5.96295  | 1.642235 | 20.17621 | 111.6063 | 121.9293 | 59.29379 |
| 13434 | LOC103238 | 3.744929 | 3.419555 | 1.612661 | 2.120443 | 0.033969 | 0.067217 | 0.542086 | 0        | 1.391463 | 6.696381 | 12.83466 | 1.004979 |
| 15900 | GUCY2D    | 16.14311 | 3.419547 | 2.030379 | 1.684192 | 0.092145 | 0.154064 | 0        | 0        | 8.348776 | 37.94616 | 38.50399 | 12.05975 |
| 11123 | LOC103231 | 77.69962 | 3.419497 | 1.316466 | 2.597482 | 0.009391 | 0.022445 | 1.626259 | 2.189647 | 36.17803 | 145.0883 | 211.772  | 69.34358 |
| 7916  | LOC119628 | 10.56868 | 3.418314 | 0.995453 | 3.433927 | 0.000595 | 0.001998 | 0        | 3.284471 | 2.087194 | 22.32127 | 25.66933 | 10.04979 |
| 8417  | KCNS1     | 10.03272 | 3.41797  | 1.043032 | 3.276955 | 0.001049 | 0.003314 | 0.542086 | 0.547412 | 4.174388 | 20.08914 | 27.80844 | 7.034856 |
| 15055 | LOC103221 | 2.563501 | 3.417402 | 1.873985 | 1.823602 | 0.068212 | 0.120453 | 0        | 0        | 1.391463 | 6.696381 | 4.278221 | 3.014938 |
| 6222  | FAM186A   | 11.89556 | 3.417009 | 0.840501 | 4.065445 | 4.79E-05 | 0.000205 | 1.084173 | 1.642235 | 3.478657 | 24.5534  | 23.53022 | 17.08465 |
| 13678 | CD19      | 23.86699 | 3.416134 | 1.647999 | 2.072898 | 0.038182 | 0.074211 | 0.542086 | 0        | 11.82743 | 42.41041 | 66.31243 | 22.10955 |
| 7333  | SLC13A4   | 12.50064 | 3.415856 | 0.943205 | 3.621542 | 0.000293 | 0.001062 | 0.542086 | 0.547412 | 5.565851 | 22.32127 | 29.94755 | 16.07967 |
| 11608 | FGR       | 4.891734 | 3.414912 | 1.370337 | 2.492024 | 0.012702 | 0.029087 | 0        | 0.547412 | 2.087194 | 13.39276 | 4.278221 | 9.044815 |
| 3804  | COL9A2    | 28.47601 | 3.414631 | 0.617002 | 5.534231 | 3.13E-08 | 2.18E-07 | 2.710432 | 4.926706 | 6.957314 | 66.96381 | 64.17332 | 25.12449 |
| 13022 | LOC119615 | 3.493272 | 3.414049 | 1.551483 | 2.200507 | 0.027771 | 0.056696 | 1.084173 | 0        | 0.695731 | 4.464254 | 10.69555 | 4.019918 |
| 13846 | LOC103227 | 3.31231  | 3.412984 | 1.672151 | 2.041074 | 0.041243 | 0.079189 | 0        | 1.642235 | 0        | 8.928508 | 4.278221 | 5.024897 |
| 10883 | SPON1     | 6.18273  | 3.412745 | 1.286219 | 2.653316 | 0.007971 | 0.01947  | 0        | 0.547412 | 2.782925 | 4.464254 | 19.252   | 10.04979 |
| 11362 | MMP24     | 4.859841 | 3.412167 | 1.340437 | 2.545562 | 0.01091  | 0.025528 | 0.542086 | 0        | 2.087194 | 8.928508 | 8.556443 | 9.044815 |
| 16204 | LOC103221 | 21.45354 | 3.411529 | 2.097303 | 1.626626 | 0.103816 | 0.170326 | 0        | 0        | 11.1317  | 35.71403 | 57.75599 | 24.11951 |
| 377   | CHI3L1    | 264.684  | 3.410907 | 0.212009 | 16.08851 | 3.07E-58 | 2.17E-56 | 42.28274 | 55.83601 | 38.26523 | 459.8182 | 449.2132 | 542.6889 |
| 11508 | AOAH      | 6.449003 | 3.410345 | 1.357185 | 2.512807 | 0.011977 | 0.02767  | 0        | 0        | 3.478657 | 8.928508 | 19.252   | 7.034856 |
| 13199 | HAO2      | 3.547577 | 3.409179 | 1.571569 | 2.169284 | 0.030061 | 0.060548 | 0        | 1.094824 | 0.695731 | 8.928508 | 8.556443 | 2.009959 |
| 14929 | CLEC1B    | 2.297228 | 3.408726 | 1.843513 | 1.849039 | 0.064452 | 0.114774 | 0        | 0.547412 | 0.695731 | 2.232127 | 4.278221 | 6.029877 |
| 14511 | LOC119618 | 3.5536   | 3.40852  | 1.773824 | 1.921566 | 0.05466  | 0.100141 | 0        | 1.094824 | 0.695731 | 6.696381 | 12.83466 | 0        |
| 12268 | RAMP3     | 5.015917 | 3.406416 | 1.448735 | 2.351304 | 0.018708 | 0.04054  | 0        | 0        | 2.782925 | 6.696381 | 8.556443 | 12.05975 |
| 12683 | CUNH16or  | 3.54669  | 3.406377 | 1.50507  | 2.263268 | 0.023619 | 0.049508 | 0.542086 | 0.547412 | 0.695731 | 8.928508 | 8.556443 | 2.009959 |
| 6027  | LOC103244 | 14.07709 | 3.40576  | 0.820131 | 4.1527   | 3.29E-05 | 0.000145 | 3.252518 | 0.547412 | 3.478657 | 29.01765 | 32.08666 | 16.07967 |
| 12843 | MEOX2     | 3.478656 | 3.40566  | 1.526979 | 2.230325 | 0.025726 | 0.053253 | 0.542086 | 0.547412 | 0.695731 | 2.232127 | 12.83466 | 4.019918 |
| 9845  | LOC119620 | 6.665896 | 3.405244 | 1.176123 | 2.895313 | 0.003788 | 0.010228 | 1.084173 | 2.189647 | 0        | 17.85702 | 12.83466 | 6.029877 |
| 8785  | CUNH6orf  | 8.61168  | 3.404947 | 1.071311 | 3.178299 | 0.001481 | 0.004483 | 0.542086 | 0.547412 | 3.478657 | 13.39276 | 25.66933 | 8.039836 |
| 8190  | CAPN6     | 8.282348 | 3.404927 | 1.016712 | 3.348958 | 0.000811 | 0.002633 | 1.084173 | 1.094824 | 2.087194 | 24.5534  | 12.83466 | 8.039836 |
| 14893 | LOC103227 | 2.349759 | 3.40486  | 1.834874 | 1.855637 | 0.063505 | 0.113361 | 0        | 0.547412 | 0.695731 | 6.696381 | 2.139111 | 4.019918 |
| 13258 | LOC119620 | 3.532075 | 3.404286 | 1.578746 | 2.156323 | 0.031058 | 0.062279 | 0        | 1.094824 | 0.695731 | 6.696381 | 10.69555 | 2.009959 |
| 12450 | ICAM2     | 5.164029 | 3.404068 | 1.473064 | 2.310876 | 0.02084  | 0.0445   | 0        | 0        | 2.782925 | 15.62489 | 8.556443 | 4.019918 |
| 1769  | ZMAT4     | 59.46231 | 3.403262 | 0.398656 | 8.536847 | 1.38E-17 | 2.07E-16 | 9.215468 | 14.23271 | 6.957314 | 102.6778 | 126.2075 | 97.48301 |
| 10279 | ZNF878    | 9.028006 | 3.402909 | 1.218013 | 2.793819 | 0.005209 | 0.013472 | 0        | 0        | 4.87012  | 17.85702 | 21.39111 | 10.04979 |
| 12403 | LOC103215 | 5.148526 | 3.400625 | 1.465402 | 2.320609 | 0.020308 | 0.043529 | 0        | 0        | 2.782925 | 13.39276 | 10.69555 | 4.019918 |
| 13415 | LOC119624 | 3.516572 | 3.400247 | 1.600995 | 2.123834 | 0.033684 | 0.066753 | 0        | 1.094824 | 0.695731 | 4.464254 | 12.83466 | 2.009959 |
| 15327 | LOC103215 | 2.532495 | 3.399559 | 1.915892 | 1.7744   | 0.075997 | 0.131818 | 0        | 0        | 1.391463 | 2.232127 | 8.556443 | 3.014938 |
| 8007  | HCAR1     | 11.97909 | 3.399107 | 0.996764 | 3.410143 | 0.000649 | 0.002156 | 0.542086 | 2.189647 | 3.478657 | 17.85702 | 42.78221 | 5.024897 |
| 6675  | WFIKKN2   | 25.39591 | 3.398901 | 0.878831 | 3.867524 | 0.00011  | 0.000438 | 0        | 1.642235 | 11.82743 | 58.0353  | 57.75599 | 23.11453 |
| 6426  | COL25A1   | 16.62094 | 3.397999 | 0.855873 | 3.970214 | 7.18E-05 | 0.000297 | 0        | 3.831883 | 4.87012  | 29.01765 | 44.92132 | 17.08465 |
| 15080 | LOC119625 | 2.385899 | 3.396849 | 1.866808 | 1.819602 | 0.06882  | 0.121324 | 0.542086 | 0        | 0.695731 | 8.928508 | 2.139111 | 2.009959 |
| 14056 | CPA6      | 3.484679 | 3.396527 | 1.69597  | 2.002705 | 0.045209 | 0.085507 | 0.542086 | 0.547412 | 0.695731 | 0        | 17.11289 | 2.009959 |
| 10174 | LOC119627 | 5.886081 | 3.39594  | 1.204116 | 2.820276 | 0.004798 | 0.012538 | 1.084173 | 0.547412 | 1.391463 | 11.16063 | 17.11289 | 4.019918 |
| 6738  | RIMBP2    | 23.83173 | 3.395226 | 0.883767 | 3.841767 | 0.000122 | 0.000482 | 0        | 2.189647 | 10.43597 | 49.10679 | 64.17332 | 17.08465 |
| 7960  | LOC119625 | 12.41757 | 3.39326  | 0.991634 | 3.421887 | 0.000622 | 0.002077 | 0        | 1.094824 | 5.565851 | 31.24978 | 23.53022 | 13.06473 |
| 7424  | SEC14L5   | 10.79049 | 3.392831 | 0.944924 | 3.590584 | 0.00033  | 0.001181 | 1.084173 | 0.547412 | 4.174388 | 29.01765 | 12.83466 | 17.08465 |
| 4608  | NLRC3     | 21.43915 | 3.392449 | 0.686847 | 4.939164 | 7.85E-07 | 4.53E-06 | 1.626259 | 2.189647 | 7.653045 | 37.94616 | 47.06043 | 32.15934 |
| 10379 | INA       | 7.347344 | 3.391847 | 1.224677 | 2.769585 | 0.005613 | 0.014375 | 1.084173 | 0        | 2.782925 | 20.08914 | 17.11289 | 3.014938 |
| 9286  | LOC103227 | 8.084899 | 3.390381 | 1.117019 | 3.035205 | 0.002404 | 0.006882 | 2.168345 | 0.547412 | 1.391463 | 17.85702 | 23.53022 | 3.014938 |
| 12867 | FAM71B    | 5.154549 | 3.390036 | 1.523407 | 2.225299 | 0.026061 | 0.053846 | 0        | 0        | 2.782925 | 11.16063 | 14.97377 | 2.009959 |
| 7550  | ACOXL     | 16.30909 | 3.389413 | 0.957073 | 3.541435 | 0.000398 | 0.001401 | 0        | 1.094824 | 7.653045 | 31.24978 | 42.78221 | 15.07469 |
| 10510 | STUM      | 7.509443 | 3.38939  | 1.235906 | 2.742433 | 0.006099 | 0.015426 | 0.542086 | 0        | 3.478657 | 15.62489 | 21.39111 | 4.019918 |
| 8296  | RXFP1     | 9.593817 | 3.388569 | 1.022459 | 3.314137 | 0.000919 | 0.002946 | 0        | 1.642235 | 3.478657 | 17.85702 | 23.53022 | 11.05477 |
| 6288  | RPRM      | 19.86155 | 3.388519 | 0.83996  | 4.034141 | 5.48E-05 | 0.000232 | 1.084173 | 0.547412 | 9.044508 | 46.87467 | 38.50399 | 23.11453 |
| 14939 | DNALI1    | 2.370396 | 3.388195 | 1.834398 | 1.847033 | 0.064742 | 0.115205 | 0.542086 | 0        | 0.695731 | 6.696381 | 4.278221 | 2.009959 |
| 11176 | TEX13B    | 9.009046 | 3.385571 | 1.309186 | 2.586011 | 0.009709 | 0.023094 | 0        | 0        | 4.87012  | 8.928508 | 34.22577 | 6.029877 |
| 14950 | PRM3      | 2.371284 | 3.384694 | 1.834047 | 1.845478 | 0.064968 | 0.11553  | 0        | 0.547412 | 0.695731 | 6.696381 | 4.278221 | 2.009959 |
| 16005 | LOC103240 | 2.408312 | 3.38442  | 2.033886 | 1.664017 | 0.096109 | 0.159646 | 0        | 0.547412 | 0.695731 | 8.928508 | 4.278221 | 0        |
| 10455 | C6        | 5.930649 | 3.383489 | 1.228244 | 2.754737 | 0.005874 | 0.014935 | 0.542086 | 0.547412 | 2.087194 | 20.08914 | 4.278221 | 8.039836 |
| 16039 | LOC119624 | 2.172157 | 3.383433 | 2.040328 | 1.658279 | 0.097261 | 0.161213 | 0.542086 | 0.547412 | 0        | 8.928508 | 0        | 3.014938 |
| 11169 | LOC119620 | 4.726178 | 3.382998 | 1.307728 | 2.586928 | 0.009684 | 0.023049 | 0.542086 | 0.547412 | 1.391463 | 11.16063 | 10.69555 | 4.019918 |
| 10590 | S1PR4     | 6.077245 | 3.382292 | 1.241218 | 2.724977 | 0.006431 | 0.016143 | 0        | 0.547412 | 2.782925 | 13.39276 | 10.69555 | 9.044815 |
| 10681 | SBSN      | 7.479325 | 3.381796 | 1.25414  | 2.696507 | 0.007007 | 0.017441 | 0        | 0.547412 | 3.478657 | 11.16063 | 25.66933 | 4.019918 |
| 7034  | BTBD17    | 10.51987 | 3.381592 | 0.908748 | 3.721156 | 0.000198 | 0.00075  | 1.626259 | 0.547412 | 3.478657 | 17.85702 | 23.53022 | 16.07967 |
| 10730 | SLC26A4   | 5.987686 | 3.380598 | 1.259213 | 2.684692 | 0.00726  | 0.017987 | 0        | 0.547412 | 2.782925 | 6.696381 | 12.83466 | 13.06473 |
| 13268 | PAX7      | 25.70566 | 3.380094 | 1.568941 | 2.15438  | 0.03121  | 0.062536 | 0        | 1.094824 | 12.52316 | 44.64254 | 74.86887 | 21.10457 |
| 6429  | CELFB3    | 24.99242 | 3.379886 | 0.851714 | 3.968336 | 7.24E-05 | 0.000299 | 0.542086 | 1.094824 | 11.82743 | 33.4819  | 74.86887 |          |



|       |           |          |          |          |          |           |           |          |          |          |          |          |          |
|-------|-----------|----------|----------|----------|----------|-----------|-----------|----------|----------|----------|----------|----------|----------|
| 8635  | LOC119621 | 11.09211 | 3.378733 | 1.049673 | 3.218845 | 0.001287  | 0.003963  | 0        | 1.094824 | 4.87012  | 29.01765 | 23.53022 | 8.039836 |
| 7790  | DMRTC2    | 16.06994 | 3.378081 | 0.973995 | 3.468273 | 0.000524  | 0.001788  | 0        | 1.642235 | 6.957314 | 42.41041 | 36.36488 | 9.044815 |
| 14972 | LIPK      | 2.355781 | 3.377063 | 1.835845 | 1.839515 | 0.06584   | 0.116908  | 0        | 0.547412 | 0.695731 | 4.464254 | 6.417332 | 2.009959 |
| 13513 | KHDC3L    | 3.705961 | 3.376295 | 1.603697 | 2.105319 | 0.035264  | 0.069371  | 0        | 0        | 2.087194 | 6.696381 | 6.417332 | 7.034856 |
| 10512 | LOC103238 | 6.927658 | 3.375985 | 1.231318 | 2.741766 | 0.006111  | 0.015455  | 0        | 2.189647 | 1.391463 | 17.85702 | 17.11289 | 3.014938 |
| 11623 | MMP8      | 6.723299 | 3.37575  | 1.35689  | 2.487858 | 0.012851  | 0.029395  | 1.626259 | 1.094824 | 0.695731 | 13.39276 | 23.53022 | 0        |
| 15994 | CYP2C8    | 2.392809 | 3.375574 | 2.025336 | 1.666674 | 0.095579  | 0.158871  | 0        | 0.547412 | 0.695731 | 6.696381 | 6.417332 | 0        |
| 5854  | NPHS1     | 16.51421 | 3.374886 | 0.795371 | 4.243162 | 2.20E-05  | 0.0001    | 2.710432 | 0.547412 | 5.565851 | 37.94616 | 34.22577 | 18.08963 |
| 8394  | CUNHXorf1 | 13.47544 | 3.37406  | 1.02769  | 3.28315  | 0.001027  | 0.003251  | 0        | 1.642235 | 5.565851 | 31.24978 | 36.36488 | 6.029877 |
| 13343 | C4BPB     | 5.071013 | 3.373244 | 1.577464 | 2.138397 | 0.032485  | 0.064723  | 0        | 0        | 2.782925 | 2.232127 | 21.39111 | 4.019918 |
| 11703 | LOC119621 | 4.7322   | 3.372375 | 1.364384 | 2.47172  | 0.013446  | 0.030546  | 0.542086 | 0.547412 | 1.391463 | 8.928508 | 14.97377 | 2.009959 |
| 16066 | LOC119621 | 2.376419 | 3.371672 | 2.038757 | 1.653788 | 0.098171  | 0.162452  | 0.542086 | 0        | 0.695731 | 4.464254 | 8.556443 | 0        |
| 2840  | ADCYAP1R  | 54.40412 | 3.371265 | 0.508424 | 6.63082  | 3.34E-11  | 3.12E-10  | 4.336691 | 9.853413 | 14.61036 | 111.6063 | 134.764  | 51.25395 |
| 9846  | CRYGN     | 7.056976 | 3.371264 | 1.164509 | 2.89501  | 0.003791  | 0.010237  | 0.542086 | 1.094824 | 2.087194 | 8.928508 | 25.66933 | 4.019918 |
| 163   | TRIM22    | 527.7094 | 3.370636 | 0.156882 | 21.48515 | 2.14E-102 | 3.50E-100 | 102.4543 | 94.70224 | 81.40057 | 1006.689 | 877.0354 | 1003.974 |
| 7590  | LOC119621 | 11.73529 | 3.370322 | 0.954958 | 3.529287 | 0.000417  | 0.001459  | 1.626259 | 4.379295 | 0        | 33.4819  | 12.83466 | 18.08963 |
| 7269  | ALX4      | 21.2841  | 3.369608 | 0.924455 | 3.644968 | 0.000267  | 0.000978  | 0        | 1.094824 | 10.43597 | 46.87467 | 49.19955 | 20.09959 |
| 10600 | MAB21L4   | 5.922056 | 3.369505 | 1.237702 | 2.722389 | 0.006481  | 0.016255  | 0        | 1.094824 | 2.087194 | 15.62489 | 10.69555 | 6.029877 |
| 10668 | SYCP1     | 6.698414 | 3.369375 | 1.248086 | 2.699634 | 0.006942  | 0.017299  | 0        | 2.737059 | 0.695731 | 15.62489 | 17.11289 | 4.019918 |
| 13746 | RFPL1     | 3.780017 | 3.369277 | 1.635675 | 2.05987  | 0.039411  | 0.076221  | 0        | 0        | 2.087194 | 11.16063 | 6.417332 | 3.014938 |
| 8958  | PTPRC     | 8.209804 | 3.368731 | 1.076646 | 3.128912 | 0.001755  | 0.005207  | 0        | 1.642235 | 2.782925 | 13.39276 | 21.39111 | 10.04979 |
| 16685 | NEUROG3   | 2.538518 | 3.368709 | 2.1808   | 1.544713 | 0.122416  | 0.195051  | 0        | 0        | 1.391463 | 0        | 12.83466 | 1.004979 |
| 13455 | LOC119621 | 3.581777 | 3.368418 | 1.591669 | 2.11628  | 0.034321  | 0.067813  | 0        | 0.547412 | 1.391463 | 13.39276 | 2.139111 | 4.019918 |
| 5276  | CCDC180   | 24.05963 | 3.366223 | 0.742358 | 4.534499 | 5.77E-06  | 2.91E-05  | 2.168345 | 1.094824 | 9.740239 | 58.0353  | 49.19955 | 24.11951 |
| 6810  | VWC2L     | 12.60655 | 3.365613 | 0.882623 | 3.813196 | 0.000137  | 0.000536  | 2.710432 | 1.094824 | 2.782925 | 26.78552 | 34.22577 | 8.039836 |
| 15295 | KRTAP4-1  | 2.156655 | 3.364731 | 1.89057  | 1.779745 | 0.075118  | 0.130566  | 0.542086 | 0.547412 | 0        | 6.696381 | 2.139111 | 3.014938 |
| 85    | CSPG4     | 6364.862 | 3.364474 | 0.131911 | 25.50558 | 1.71E-143 | 5.35E-141 | 1212.647 | 955.781  | 1213.356 | 11348.13 | 10137.25 | 13322.01 |
| 3254  | TMEM114   | 47.08412 | 3.363678 | 0.552047 | 6.093104 | 1.11E-09  | 9.05E-09  | 4.336691 | 4.926706 | 16.00182 | 111.6063 | 98.39909 | 47.23404 |
| 8890  | LOC103231 | 8.251079 | 3.363609 | 1.068846 | 3.146954 | 0.00165   | 0.004934  | 1.084173 | 0.547412 | 2.782925 | 13.39276 | 25.66933 | 6.029877 |
| 7953  | LOC103231 | 9.440935 | 3.361918 | 0.981881 | 3.423955 | 0.000617  | 0.002063  | 0.542086 | 1.094824 | 3.478657 | 20.08914 | 21.39111 | 10.04979 |
| 16267 | LOC103231 | 2.361804 | 3.360879 | 2.081828 | 1.614389 | 0.106443  | 0.173959  | 0        | 0.547412 | 0.695731 | 2.232127 | 10.69555 | 0        |
| 12980 | LOC119621 | 4.525369 | 3.360584 | 1.522417 | 2.2074   | 0.027286  | 0.055885  | 0        | 1.642235 | 0.695731 | 6.696381 | 17.11289 | 1.004979 |
| 12320 | CRISPLD1  | 4.503843 | 3.360284 | 1.434911 | 2.341807 | 0.019191  | 0.041411  | 0        | 1.642235 | 0.695731 | 6.696381 | 14.97377 | 3.014938 |
| 14292 | MSGN1     | 3.801542 | 3.359768 | 1.711797 | 1.962714 | 0.049679  | 0.09241   | 0        | 0        | 2.087194 | 11.16063 | 8.556443 | 1.004979 |
| 12144 | LOC103211 | 6.303032 | 3.358877 | 1.412565 | 2.377857 | 0.017414  | 0.038121  | 0        | 0        | 3.478657 | 8.928508 | 21.39111 | 4.019918 |
| 5451  | KCNH7     | 18.72402 | 3.35868  | 0.756569 | 4.439359 | 9.02E-06  | 4.40E-05  | 2.710432 | 1.094824 | 6.261582 | 42.41041 | 42.78221 | 17.08465 |
| 13493 | LOC103211 | 4.311627 | 3.358532 | 1.592955 | 2.108366 | 0.034999  | 0.068953  | 0        | 2.189647 | 0        | 6.696381 | 14.97377 | 2.009959 |
| 3042  | PKHD1     | 41.66733 | 3.358058 | 0.52886  | 6.349616 | 2.16E-10  | 1.89E-09  | 4.336691 | 9.306001 | 8.348776 | 89.28508 | 100.5382 | 38.18922 |
| 17137 | LOC103221 | 2.346301 | 3.357596 | 2.277037 | 1.474546 | 0.140335  | 0.217704  | 0        | 0.547412 | 0.695731 | 0        | 12.83466 | 0        |
| 9222  | AADACL3   | 11.14181 | 3.357502 | 1.101068 | 3.049314 | 0.002294  | 0.006612  | 0        | 0.547412 | 5.565851 | 35.71403 | 14.97377 | 10.04979 |
| 5102  | CD3D      | 25.12033 | 3.357142 | 0.725488 | 4.627429 | 3.70E-06  | 1.93E-05  | 1.084173 | 2.189647 | 10.43597 | 49.10679 | 57.75599 | 30.14938 |
| 8491  | DPRX      | 8.037338 | 3.357067 | 1.030392 | 3.258048 | 0.001122  | 0.003512  | 1.084173 | 1.094824 | 2.087194 | 13.39276 | 23.53022 | 7.034856 |
| 11582 | VSX2      | 5.568629 | 3.356121 | 1.343287 | 2.498439 | 0.012474  | 0.028633  | 0        | 2.189647 | 0.695731 | 20.08914 | 6.417332 | 4.019918 |
| 6250  | NSG2      | 24.46479 | 3.356051 | 0.828415 | 4.051172 | 5.10E-05  | 0.000217  | 0.542086 | 1.642235 | 11.1317  | 51.33892 | 62.03421 | 20.09959 |
| 10378 | RBF0X1    | 63.90222 | 3.355637 | 1.211487 | 2.769848 | 0.005608  | 0.014366  | 1.626259 | 2.737059 | 29.91645 | 124.9991 | 166.8506 | 57.28383 |
| 11915 | LOC103211 | 4.72335  | 3.355471 | 1.385676 | 2.421541 | 0.015455  | 0.034483  | 0.542086 | 0        | 2.087194 | 13.39276 | 4.278221 | 8.039836 |
| 15204 | LOC103241 | 2.141152 | 3.354985 | 1.868416 | 1.795631 | 0.072553  | 0.126863  | 0.542086 | 0.547412 | 0        | 4.464254 | 4.278221 | 3.014938 |
| 10049 | LOC119621 | 9.981444 | 3.354669 | 1.176597 | 2.851161 | 0.004356  | 0.011524  | 0        | 0        | 5.565851 | 17.85702 | 21.39111 | 15.07469 |
| 7915  | LOC103231 | 10.08034 | 3.354443 | 0.976772 | 3.434212 | 0.000594  | 0.001996  | 1.084173 | 2.189647 | 2.087194 | 6.696381 | 36.36488 | 12.05975 |
| 13227 | GABRA3    | 30.23097 | 3.3543   | 1.550302 | 2.163643 | 0.030492  | 0.061285  | 0        | 1.642235 | 14.61036 | 71.42806 | 70.59065 | 23.11453 |
| 14091 | GRIA3     | 44.51944 | 3.353142 | 1.679584 | 1.996412 | 0.045889  | 0.086577  | 0        | 1.642235 | 22.2634  | 73.66019 | 128.3466 | 41.20416 |
| 13396 | CCR4      | 3.5878   | 3.353016 | 1.575491 | 2.128236 | 0.033318  | 0.06612   | 0        | 0.547412 | 1.391463 | 11.16063 | 6.417332 | 2.009959 |
| 14057 | SMIM35    | 41.8935  | 3.351914 | 1.67387  | 2.002494 | 0.045232  | 0.085543  | 0        | 1.642235 | 20.87194 | 75.89232 | 119.7902 | 33.16432 |
| 13971 | LOC119621 | 3.733508 | 3.351844 | 1.661487 | 2.017376 | 0.043656  | 0.083072  | 0        | 0        | 2.087194 | 4.464254 | 12.83466 | 3.014938 |
| 6232  | SLC17A8   | 15.28611 | 3.351536 | 0.825453 | 4.060237 | 4.90E-05  | 0.000209  | 0.542086 | 1.642235 | 6.261582 | 33.4819  | 25.66933 | 24.11951 |
| 9493  | DDO       | 8.361277 | 3.351089 | 1.122386 | 2.985683 | 0.002829  | 0.007924  | 0.542086 | 0        | 4.174388 | 13.39276 | 14.97377 | 17.08465 |
| 14620 | CLPS      | 3.608438 | 3.351034 | 1.760302 | 1.90367  | 0.056953  | 0.103564  | 0.542086 | 0        | 1.391463 | 11.16063 | 8.556443 | 0        |
| 13232 | LOC119621 | 3.518879 | 3.35092  | 1.549749 | 2.162234 | 0.0306    | 0.06148   | 0.542086 | 0        | 1.391463 | 4.464254 | 10.69555 | 4.019918 |
| 18549 | LOC119618 | 1.157963 | 3.350369 | 2.695147 | 1.243112 | 0.213827  | 0.306446  | 0        | 0        | 0.695731 | 2.232127 | 0        | 4.019918 |
| 18611 | LOC119621 | 1.133243 | 3.349596 | 2.713511 | 1.234414 | 0.217049  | 0.309867  | 0        | 0.547412 | 0        | 2.232127 | 0        | 4.019918 |
| 11570 | LOC119618 | 7.550553 | 3.349171 | 1.338903 | 2.50143  | 0.012369  | 0.028422  | 0        | 0        | 4.174388 | 17.85702 | 19.252   | 4.019918 |
| 8854  | HOXC12    | 9.255629 | 3.348966 | 1.061202 | 3.155823 | 0.0016    | 0.004805  | 0        | 2.189647 | 2.782925 | 17.85702 | 25.66933 | 7.034856 |
| 15796 | LYPD8     | 3.200704 | 3.347932 | 1.965991 | 1.702923 | 0.088582  | 0.149086  | 1.626259 | 0        | 0        | 11.16063 | 6.417332 | 0        |
| 7019  | DCX       | 24.61139 | 3.347412 | 0.898063 | 3.727371 | 0.000193  | 0.000733  | 0        | 1.642235 | 11.82743 | 44.64254 | 68.45154 | 21.10457 |
| 10791 | NLR4      | 5.210135 | 3.347342 | 1.252725 | 2.672047 | 0.007539  | 0.018572  | 1.626259 | 1.094824 | 0        | 8.928508 | 8.556443 | 11.05477 |
| 19452 | LOC103241 | 1.207299 | 3.346703 | 3.01588  | 1.109694 | 0.267131  | 0.365066  | 0        | 0.547412 | 0        | 6.696381 | 0        | 0        |
| 19453 | LOC119621 | 1.207299 | 3.346703 | 3.01588  | 1.109694 | 0.267131  | 0.365066  | 0        | 0.547412 | 0        | 6.696381 | 0        | 0        |
| 19405 | LOC119621 | 1.232019 | 3.345889 | 2.995844 | 1.116843 | 0.264061  | 0.361654  | 0        | 0        | 0.695731 | 6.696381 | 0        | 0        |
| 19406 | BBOX1     | 1.232019 | 3.345889 | 2.995844 | 1.116843 | 0.264061  | 0.361654  | 0        | 0        | 0.695731 | 6.696381 | 0        | 0        |
| 19410 | LOC103231 | 1.232019 | 3.345889 | 2.995844 | 1.116843 | 0.264061  | 0.361654  | 0        | 0        | 0.695731 | 6.696381 | 0        | 0        |
| 19411 | LOC103231 | 1.232019 | 3.345889 | 2.995844 | 1.116843 | 0.264061  | 0.361654  | 0        | 0        | 0.695731 | 6.696381 | 0        | 0        |
| 16133 | LOC119621 | 2.163565 | 3.345767 | 2.040375 | 1.639978 | 0.101051  | 0.166522  | 0        | 1.094824 | 0        | 4.464254 | 6.417332 | 1.004979 |
| 16137 | LOC103231 | 2.163565 | 3.345767 | 2.040375 | 1.639978 | 0.101051  | 0.166522  | 0        | 1.094824 | 0        | 4.464254 | 6.417332 | 1.00497  |



|       |           |          |          |          |          |           |           |          |          |          |          |          |          |
|-------|-----------|----------|----------|----------|----------|-----------|-----------|----------|----------|----------|----------|----------|----------|
| 6604  | ABCC12    | 12.44942 | 3.344252 | 0.857305 | 3.900888 | 9.58E-05  | 0.000386  | 2.168345 | 1.642235 | 2.782925 | 31.24978 | 27.80844 | 9.044815 |
| 641   | OSR1      | 148.691  | 3.34141  | 0.253054 | 13.20434 | 8.28E-40  | 3.44E-38  | 29.27266 | 22.9913  | 27.82925 | 308.0335 | 241.7195 | 262.2996 |
| 8132  | TRPCS     | 14.63765 | 3.341126 | 0.991478 | 3.369843 | 0.000752  | 0.002459  | 0        | 0.547412 | 7.653045 | 24.5534  | 29.94755 | 25.12449 |
| 18467 | LOC119624 | 1.194991 | 3.34075  | 2.665052 | 1.25354  | 0.210009  | 0.301974  | 0        | 0        | 0.695731 | 4.464254 | 0        | 2.009959 |
| 18468 | LOC10324  | 1.194991 | 3.34075  | 2.665052 | 1.25354  | 0.210009  | 0.301974  | 0        | 0        | 0.695731 | 4.464254 | 0        | 2.009959 |
| 18472 | LOC119618 | 1.194991 | 3.34075  | 2.665052 | 1.25354  | 0.210009  | 0.301974  | 0        | 0        | 0.695731 | 4.464254 | 0        | 2.009959 |
| 18474 | TRNAY-GU  | 1.194991 | 3.34075  | 2.665052 | 1.25354  | 0.210009  | 0.301974  | 0        | 0        | 0.695731 | 4.464254 | 0        | 2.009959 |
| 18492 | LOC11962  | 1.194991 | 3.34075  | 2.665052 | 1.25354  | 0.210009  | 0.301974  | 0        | 0        | 0.695731 | 4.464254 | 0        | 2.009959 |
| 18499 | LOC119618 | 1.194991 | 3.34075  | 2.665052 | 1.25354  | 0.210009  | 0.301974  | 0        | 0        | 0.695731 | 4.464254 | 0        | 2.009959 |
| 18500 | LOC119618 | 1.194991 | 3.34075  | 2.665052 | 1.25354  | 0.210009  | 0.301974  | 0        | 0        | 0.695731 | 4.464254 | 0        | 2.009959 |
| 5647  | HTRA4     | 14.3088  | 3.340251 | 0.768006 | 4.349249 | 1.37E-05  | 6.43E-05  | 2.710432 | 2.737059 | 2.087194 | 29.01765 | 34.22577 | 15.07469 |
| 13241 | DSG1      | 3.321528 | 3.339698 | 1.547171 | 2.158584 | 0.030882  | 0.062005  | 0        | 1.094824 | 0.695731 | 6.696381 | 6.417332 | 5.024897 |
| 124   | MARCHF4   | 890.8347 | 3.33857  | 0.143119 | 23.32715 | 2.35E-120 | 5.04E-118 | 136.6058 | 188.8571 | 155.1481 | 1654.006 | 1589.359 | 1621.032 |
| 10626 | NNAT      | 8.671488 | 3.338226 | 1.230746 | 2.71236  | 0.006681  | 0.016714  | 0        | 0        | 4.87012  | 17.85702 | 19.252   | 10.04979 |
| 16344 | LOC119624 | 15.34308 | 3.338103 | 2.090503 | 1.596794 | 0.110312  | 0.179432  | 0        | 0        | 8.348776 | 22.32127 | 51.33866 | 10.04979 |
| 14684 | MPPED1    | 27.91196 | 3.337564 | 1.763965 | 1.892081 | 0.05848   | 0.105877  | 0        | 0.547412 | 14.61036 | 62.49956 | 72.72976 | 17.08465 |
| 15570 | GPR183    | 2.162677 | 3.336993 | 1.92526  | 1.733268 | 0.083048  | 0.141791  | 0.542086 | 0.547412 | 0        | 4.464254 | 6.417332 | 1.004979 |
| 6805  | LOC103218 | 13.62634 | 3.334833 | 0.874175 | 3.814835 | 0.000136  | 0.000532  | 1.626259 | 2.189647 | 3.478657 | 26.78552 | 40.6431  | 7.034856 |
| 19567 | LOC10323  | 1.095327 | 3.332959 | 3.059991 | 1.089205 | 0.276063  | 0.375078  | 0.542086 | 0        | 0        | 0        | 0        | 6.029877 |
| 12780 | FBXO47    | 4.912996 | 3.332838 | 1.485857 | 2.243041 | 0.024894  | 0.051785  | 0        | 0        | 2.782925 | 6.696381 | 14.97377 | 5.024897 |
| 13410 | KCNU1     | 3.358556 | 3.332432 | 1.568258 | 2.124925 | 0.033593  | 0.066599  | 0        | 1.094824 | 0.695731 | 8.928508 | 6.417332 | 3.014938 |
| 3267  | LRP2      | 35.6652  | 3.331842 | 0.548344 | 6.076186 | 1.23E-09  | 1.00E-08  | 5.96295  | 4.926706 | 8.348776 | 58.0353  | 100.5382 | 36.17926 |
| 3686  | IL1RL1    | 24.22829 | 3.33177  | 0.589318 | 5.653605 | 1.57E-08  | 1.13E-07  | 3.794605 | 4.379295 | 4.87012  | 42.41041 | 57.75599 | 32.15934 |
| 15814 | FOXK2     | 3.187864 | 3.331467 | 1.961083 | 1.698789 | 0.089359  | 0.150225  | 0        | 1.642235 | 0        | 8.928508 | 8.556443 | 0        |
| 4722  | KRT1      | 27.8948  | 3.331227 | 0.684307 | 4.868031 | 1.13E-06  | 6.35E-06  | 1.626259 | 3.284471 | 10.43597 | 46.87467 | 77.00798 | 28.13943 |
| 11093 | RBPJL     | 8.699036 | 3.330674 | 1.277447 | 2.607289 | 0.009126  | 0.021872  | 0        | 0        | 4.87012  | 15.62489 | 25.66933 | 6.029877 |
| 13757 | TBC1D28   | 4.809451 | 3.330401 | 1.620045 | 2.055746 | 0.039807  | 0.076921  | 0.542086 | 0        | 2.087194 | 13.39276 | 12.83466 | 0        |
| 11901 | LOC119624 | 4.553546 | 3.330269 | 1.373628 | 2.424433 | 0.015332  | 0.03425   | 0        | 1.094824 | 1.391463 | 13.39276 | 6.417332 | 5.024897 |
| 12414 | LOC119618 | 4.646724 | 3.329355 | 1.436373 | 2.31789  | 0.020455  | 0.043807  | 0        | 0.547412 | 2.087194 | 2.232127 | 14.97377 | 8.039836 |
| 10902 | UCP1      | 5.894245 | 3.329062 | 1.256071 | 2.650376 | 0.00804   | 0.019606  | 0        | 0.547412 | 2.782925 | 11.16063 | 12.83466 | 8.039836 |
| 8599  | LOC119624 | 9.237298 | 3.328811 | 1.030633 | 3.229869 | 0.001238  | 0.003829  | 0        | 1.642235 | 3.478657 | 17.85702 | 21.39111 | 11.05477 |
| 6524  | LOC10322  | 26.78045 | 3.328781 | 0.847192 | 3.929191 | 8.52E-05  | 0.000347  | 0.542086 | 1.094824 | 13.2189  | 49.10679 | 70.59065 | 26.12947 |
| 9225  | SYL2      | 7.881096 | 3.328522 | 1.091679 | 3.048993 | 0.002296  | 0.006617  | 0        | 2.189647 | 2.087194 | 17.85702 | 17.11289 | 8.039836 |
| 6366  | COL2A1    | 20.71824 | 3.327916 | 0.832679 | 3.996636 | 6.42E-05  | 0.000268  | 0        | 4.379295 | 6.957314 | 42.41041 | 53.47777 | 17.08465 |
| 10006 | LOC10321  | 7.756913 | 3.327885 | 1.163736 | 2.859656 | 0.004241  | 0.011268  | 0        | 2.737059 | 1.391463 | 24.5534  | 12.83466 | 5.024897 |
| 12347 | VTN       | 5.249728 | 3.327505 | 1.425283 | 2.334628 | 0.019563  | 0.042122  | 1.626259 | 1.094824 | 0        | 2.232127 | 23.53022 | 3.014938 |
| 13163 | PLA2G2C   | 4.934522 | 3.326333 | 1.527224 | 2.178026 | 0.029404  | 0.059387  | 0        | 0        | 2.782925 | 6.696381 | 17.11289 | 3.014938 |
| 1704  | LOC10324  | 58.84654 | 3.324837 | 0.381483 | 8.715553 | 2.89E-18  | 4.51E-17  | 11.9259  | 12.04306 | 7.653045 | 111.6063 | 113.3729 | 96.47803 |
| 18002 | LOC103228 | 1.154768 | 3.324304 | 2.476783 | 1.342186 | 0.179536  | 0.26512   | 0        | 0.547412 | 0        | 2.232127 | 2.139111 | 2.009959 |
| 18003 | ADAM7     | 1.154768 | 3.324304 | 2.476783 | 1.342186 | 0.179536  | 0.26512   | 0        | 0.547412 | 0        | 2.232127 | 2.139111 | 2.009959 |
| 17955 | LELP1     | 1.179488 | 3.324245 | 2.462192 | 1.350116 | 0.176979  | 0.261984  | 0        | 0        | 0.695731 | 2.232127 | 2.139111 | 2.009959 |
| 17956 | LOC103228 | 1.179488 | 3.324245 | 2.462192 | 1.350116 | 0.176979  | 0.261984  | 0        | 0        | 0.695731 | 2.232127 | 2.139111 | 2.009959 |
| 17957 | LOC10323  | 1.179488 | 3.324245 | 2.462192 | 1.350116 | 0.176979  | 0.261984  | 0        | 0        | 0.695731 | 2.232127 | 2.139111 | 2.009959 |
| 17959 | PRR15L    | 1.179488 | 3.324245 | 2.462192 | 1.350116 | 0.176979  | 0.261984  | 0        | 0        | 0.695731 | 2.232127 | 2.139111 | 2.009959 |
| 6664  | CCN4      | 13.63839 | 3.323225 | 0.85827  | 3.872005 | 0.000108  | 0.000431  | 0.542086 | 2.189647 | 4.87012  | 15.62489 | 38.50399 | 20.09959 |
| 12402 | CNTN6     | 4.705277 | 3.321704 | 1.431369 | 2.320648 | 0.020306  | 0.043528  | 0        | 0.547412 | 2.087194 | 4.464254 | 17.11289 | 4.019918 |
| 10964 | ARGFX     | 5.752784 | 3.321071 | 1.259785 | 2.636222 | 0.008383  | 0.020326  | 1.084173 | 0        | 2.087194 | 15.62489 | 10.69555 | 5.024897 |
| 11164 | LOC10323  | 5.86324  | 3.32046  | 1.282698 | 2.588654 | 0.009635  | 0.022944  | 0        | 0.547412 | 2.782925 | 6.696381 | 17.11289 | 8.039836 |
| 13369 | LOC11962  | 4.919019 | 3.320444 | 1.557141 | 2.132397 | 0.032974  | 0.065571  | 0        | 0        | 2.782925 | 4.464254 | 19.252   | 3.014938 |
| 11936 | GPR62     | 5.627714 | 3.320171 | 1.37347  | 2.417361 | 0.015634  | 0.03482   | 1.626259 | 0        | 1.391463 | 22.32127 | 6.417332 | 2.009959 |
| 10315 | CUNH3orf  | 7.109874 | 3.319757 | 1.191905 | 2.785253 | 0.005349  | 0.013784  | 0.542086 | 0        | 3.478657 | 15.62489 | 14.97377 | 8.039836 |
| 11952 | LOC103228 | 4.507038 | 3.317948 | 1.37457  | 2.413809 | 0.015787  | 0.035115  | 0        | 1.094824 | 1.391463 | 6.696381 | 12.83466 | 5.024897 |
| 10741 | LOC103234 | 5.702029 | 3.317857 | 1.236984 | 2.682216 | 0.007314  | 0.018102  | 0        | 1.094824 | 2.087194 | 11.16063 | 12.83466 | 7.034856 |
| 12803 | SHH       | 4.688887 | 3.317787 | 1.48214  | 2.238511 | 0.025188  | 0.052302  | 0.542086 | 0        | 2.087194 | 2.232127 | 19.252   | 4.019918 |
| 9509  | LOC10323  | 7.849776 | 3.317767 | 1.112332 | 2.982714 | 0.002857  | 0.007988  | 1.626259 | 0.547412 | 2.087194 | 11.16063 | 27.80844 | 4.019918 |
| 12303 | LOC119618 | 4.595709 | 3.317366 | 1.415442 | 2.343695 | 0.019094  | 0.041261  | 0.542086 | 0.547412 | 1.391463 | 13.39276 | 10.69555 | 1.004979 |
| 18823 | LOC119618 | 1.190908 | 3.316026 | 2.729615 | 1.214833 | 0.22443   | 0.316977  | 0.542086 | 0        | 0        | 4.464254 | 2.139111 | 0        |
| 18813 | LOC119618 | 1.191796 | 3.315992 | 2.729001 | 1.215094 | 0.22433   | 0.316862  | 0        | 0.547412 | 0        | 4.464254 | 2.139111 | 0        |
| 18814 | LOC103218 | 1.191796 | 3.315992 | 2.729001 | 1.215094 | 0.22433   | 0.316862  | 0        | 0.547412 | 0        | 4.464254 | 2.139111 | 0        |
| 18815 | KRBOX1    | 1.191796 | 3.315992 | 2.729001 | 1.215094 | 0.22433   | 0.316862  | 0        | 0.547412 | 0        | 4.464254 | 2.139111 | 0        |
| 18816 | LOC119618 | 1.191796 | 3.315992 | 2.729001 | 1.215094 | 0.22433   | 0.316862  | 0        | 0.547412 | 0        | 4.464254 | 2.139111 | 0        |
| 18817 | LOC119618 | 1.191796 | 3.315992 | 2.729001 | 1.215094 | 0.22433   | 0.316862  | 0        | 0.547412 | 0        | 4.464254 | 2.139111 | 0        |
| 18818 | LOC119620 | 1.191796 | 3.315992 | 2.729001 | 1.215094 | 0.22433   | 0.316862  | 0        | 0.547412 | 0        | 4.464254 | 2.139111 | 0        |
| 18821 | PAGE3     | 1.191796 | 3.315992 | 2.729001 | 1.215094 | 0.22433   | 0.316862  | 0        | 0.547412 | 0        | 4.464254 | 2.139111 | 0        |
| 18822 | LOC10322  | 1.191796 | 3.315992 | 2.729001 | 1.215094 | 0.22433   | 0.316862  | 0        | 0.547412 | 0        | 4.464254 | 2.139111 | 0        |
| 14025 | CYP4F22   | 23.66822 | 3.315958 | 1.651032 | 2.008415 | 0.044599  | 0.084534  | 0        | 0.547412 | 12.52316 | 33.4819  | 66.31243 | 29.1444  |
| 18763 | LOC103238 | 1.216516 | 3.315041 | 2.712157 | 1.222289 | 0.221598  | 0.313795  | 0        | 0        | 0.695731 | 4.464254 | 2.139111 | 0        |
| 18764 | LOC103238 | 1.216516 | 3.315041 | 2.712157 | 1.222289 | 0.221598  | 0.313795  | 0        | 0        | 0.695731 | 4.464254 | 2.139111 | 0        |
| 18765 | LALBA     | 1.216516 | 3.315041 | 2.712157 | 1.222289 | 0.221598  | 0.313795  | 0        | 0        | 0.695731 | 4.464254 | 2.139111 | 0        |
| 18766 | LOC119624 | 1.216516 | 3.315041 | 2.712157 | 1.222289 | 0.221598  | 0.313795  | 0        | 0        | 0.695731 | 4.464254 | 2.139111 | 0        |
| 18767 | LOC119628 | 1.216516 | 3.315041 | 2.712157 | 1.222289 | 0.221598  | 0.313795  | 0        | 0        | 0.695731 | 4.464254 | 2.139111 | 0        |
| 18768 | IQCF3     | 1.216516 | 3.315041 | 2.712157 | 1.222289 | 0.221598  | 0.313795  | 0        | 0        | 0.695731 | 4.464254 | 2.139111 | 0        |
| 18769 | LOC119628 | 1.216516 | 3.315041 | 2.712157 | 1.222289 | 0.221598  | 0.313795  | 0        | 0        | 0.695731 | 4.464254 | 2.139111 | 0        |
| 18770 | RIBC2     | 1.216516 | 3.315041 | 2.712157 | 1.222289 | 0.221598  | 0.313795  |          |          |          |          |          |          |



|       |           |          |          |          |          |           |           |          |          |          |          |          |          |
|-------|-----------|----------|----------|----------|----------|-----------|-----------|----------|----------|----------|----------|----------|----------|
| 18771 | GPR18     | 1.216516 | 3.315041 | 2.712157 | 1.222289 | 0.221598  | 0.313795  | 0        | 0        | 0.695731 | 4.464254 | 2.139111 | 0        |
| 18774 | LOC103225 | 1.216516 | 3.315041 | 2.712157 | 1.222289 | 0.221598  | 0.313795  | 0        | 0        | 0.695731 | 4.464254 | 2.139111 | 0        |
| 4051  | SCUBE3    | 54.90004 | 3.314578 | 0.621637 | 5.332015 | 9.71E-08  | 6.37E-07  | 2.168345 | 6.02153  | 22.2634  | 98.21359 | 145.4595 | 55.27387 |
| 8227  | GJA5      | 22.11283 | 3.313974 | 0.992794 | 3.338028 | 0.000844  | 0.002727  | 0        | 0.547412 | 11.82743 | 40.17829 | 62.03421 | 18.08963 |
| 26658 | LOC119625 | 0.50249  | 3.311691 | 4.047647 | 0.818177 | 0.413256  | NA        | 0        | 0        | 0        | 0        | 0        | 3.014938 |
| 27013 | OMD       | 0.50249  | 3.311691 | 4.047647 | 0.818177 | 0.413256  | NA        | 0        | 0        | 0        | 0        | 0        | 3.014938 |
| 27077 | LOC119624 | 0.50249  | 3.311691 | 4.047647 | 0.818177 | 0.413256  | NA        | 0        | 0        | 0        | 0        | 0        | 3.014938 |
| 27245 | LOC119625 | 0.50249  | 3.311691 | 4.047647 | 0.818177 | 0.413256  | NA        | 0        | 0        | 0        | 0        | 0        | 3.014938 |
| 27733 | LOC119625 | 0.50249  | 3.311691 | 4.047647 | 0.818177 | 0.413256  | NA        | 0        | 0        | 0        | 0        | 0        | 3.014938 |
| 27763 | LOC119625 | 0.50249  | 3.311691 | 4.047647 | 0.818177 | 0.413256  | NA        | 0        | 0        | 0        | 0        | 0        | 3.014938 |
| 27956 | LOC119625 | 0.50249  | 3.311691 | 4.047647 | 0.818177 | 0.413256  | NA        | 0        | 0        | 0        | 0        | 0        | 3.014938 |
| 28033 | TTR       | 0.50249  | 3.311691 | 4.047647 | 0.818177 | 0.413256  | NA        | 0        | 0        | 0        | 0        | 0        | 3.014938 |
| 28035 | LOC119618 | 0.50249  | 3.311691 | 4.047647 | 0.818177 | 0.413256  | NA        | 0        | 0        | 0        | 0        | 0        | 3.014938 |
| 28149 | GOT1L1    | 0.50249  | 3.311691 | 4.047647 | 0.818177 | 0.413256  | NA        | 0        | 0        | 0        | 0        | 0        | 3.014938 |
| 28243 | LOC119615 | 0.50249  | 3.311691 | 4.047647 | 0.818177 | 0.413256  | NA        | 0        | 0        | 0        | 0        | 0        | 3.014938 |
| 28295 | LOC119615 | 0.50249  | 3.311691 | 4.047647 | 0.818177 | 0.413256  | NA        | 0        | 0        | 0        | 0        | 0        | 3.014938 |
| 28312 | LOC119615 | 0.50249  | 3.311691 | 4.047647 | 0.818177 | 0.413256  | NA        | 0        | 0        | 0        | 0        | 0        | 3.014938 |
| 28582 | LOC103235 | 0.50249  | 3.311691 | 4.047647 | 0.818177 | 0.413256  | NA        | 0        | 0        | 0        | 0        | 0        | 3.014938 |
| 28783 | LOC119625 | 0.50249  | 3.311691 | 4.047647 | 0.818177 | 0.413256  | NA        | 0        | 0        | 0        | 0        | 0        | 3.014938 |
| 28883 | LOC119625 | 0.50249  | 3.311691 | 4.047647 | 0.818177 | 0.413256  | NA        | 0        | 0        | 0        | 0        | 0        | 3.014938 |
| 28966 | LOC103234 | 0.50249  | 3.311691 | 4.047647 | 0.818177 | 0.413256  | NA        | 0        | 0        | 0        | 0        | 0        | 3.014938 |
| 29005 | LOC119625 | 0.50249  | 3.311691 | 4.047647 | 0.818177 | 0.413256  | NA        | 0        | 0        | 0        | 0        | 0        | 3.014938 |
| 29207 | LOC103225 | 0.50249  | 3.311691 | 4.047647 | 0.818177 | 0.413256  | NA        | 0        | 0        | 0        | 0        | 0        | 3.014938 |
| 11008 | LOC119628 | 5.723554 | 3.311246 | 1.260127 | 2.627709 | 0.008596  | 0.02076   | 0        | 1.094824 | 2.087194 | 11.16063 | 14.97377 | 5.024897 |
| 14740 | LOC119628 | 3.098306 | 3.309596 | 1.757718 | 1.882893 | 0.059715  | 0.107701  | 0        | 1.642235 | 0        | 2.232127 | 10.69555 | 4.019918 |
| 18654 | GADD45G   | 1.163985 | 3.30907  | 2.684343 | 1.23273  | 0.217677  | 0.310012  | 0        | 0        | 0.695731 | 0        | 4.278221 | 2.009959 |
| 18656 | LOC119624 | 1.163985 | 3.30907  | 2.684343 | 1.23273  | 0.217677  | 0.310012  | 0        | 0        | 0.695731 | 0        | 4.278221 | 2.009959 |
| 18658 | LOC119625 | 1.163985 | 3.30907  | 2.684343 | 1.23273  | 0.217677  | 0.310012  | 0        | 0        | 0.695731 | 0        | 4.278221 | 2.009959 |
| 18659 | LOC119625 | 1.163985 | 3.30907  | 2.684343 | 1.23273  | 0.217677  | 0.310012  | 0        | 0        | 0.695731 | 0        | 4.278221 | 2.009959 |
| 18661 | LOC103245 | 1.163985 | 3.30907  | 2.684343 | 1.23273  | 0.217677  | 0.310012  | 0        | 0        | 0.695731 | 0        | 4.278221 | 2.009959 |
| 18664 | LOC119620 | 1.163985 | 3.30907  | 2.684343 | 1.23273  | 0.217677  | 0.310012  | 0        | 0        | 0.695731 | 0        | 4.278221 | 2.009959 |
| 18666 | LOC119625 | 1.163985 | 3.30907  | 2.684343 | 1.23273  | 0.217677  | 0.310012  | 0        | 0        | 0.695731 | 0        | 4.278221 | 2.009959 |
| 18669 | LOC119625 | 1.163985 | 3.30907  | 2.684343 | 1.23273  | 0.217677  | 0.310012  | 0        | 0        | 0.695731 | 0        | 4.278221 | 2.009959 |
| 18750 | GK2       | 1.139265 | 3.309049 | 2.702524 | 1.224429 | 0.22079   | 0.313035  | 0        | 0.547412 | 0        | 0        | 4.278221 | 2.009959 |
| 18751 | GNRHR     | 1.139265 | 3.309049 | 2.702524 | 1.224429 | 0.22079   | 0.313035  | 0        | 0.547412 | 0        | 0        | 4.278221 | 2.009959 |
| 4709  | NOS1      | 38.32845 | 3.308841 | 0.67815  | 4.87922  | 1.07E-06  | 6.01E-06  | 3.794605 | 2.189647 | 15.30609 | 95.98146 | 85.56443 | 27.13445 |
| 6647  | ENTPD1    | 20.03977 | 3.307436 | 0.852587 | 3.879293 | 0.000105  | 0.000419  | 0.542086 | 1.642235 | 9.044508 | 46.87467 | 47.06043 | 15.07469 |
| 93    | SMTNL2    | 733.0564 | 3.307322 | 0.134239 | 24.63764 | 4.99E-134 | 1.43E-131 | 125.222  | 142.3271 | 136.3633 | 1381.687 | 1244.962 | 1367.777 |
| 2194  | LOC103244 | 47.85344 | 3.307203 | 0.433843 | 7.623034 | 2.48E-14  | 3.00E-13  | 5.96295  | 10.94824 | 9.740239 | 73.66019 | 81.28621 | 105.5228 |
| 7971  | IQSEC3    | 12.75078 | 3.305193 | 0.966757 | 3.418847 | 0.000629  | 0.002097  | 0        | 1.642235 | 5.565851 | 17.85702 | 36.36488 | 15.07469 |
| 6909  | ARHGEF15  | 16.43993 | 3.305073 | 0.875649 | 3.774425 | 0.00016   | 0.000617  | 0.542086 | 1.094824 | 7.653045 | 40.17829 | 32.08666 | 17.08465 |
| 8566  | NLRP3     | 9.261131 | 3.304969 | 1.020655 | 3.238086 | 0.001203  | 0.003735  | 0.542086 | 0.547412 | 4.174388 | 17.85702 | 21.39111 | 11.05477 |
| 10394 | LOC119625 | 5.456394 | 3.3047   | 1.194121 | 2.767476 | 0.005649  | 0.014449  | 0.542086 | 1.094824 | 1.391463 | 6.696381 | 14.97377 | 8.039836 |
| 7890  | GJB1      | 12.73952 | 3.302945 | 0.95886  | 3.444657 | 0.000572  | 0.001927  | 1.084173 | 0.547412 | 5.565851 | 13.39276 | 42.78221 | 13.06473 |
| 15621 | LOC119625 | 2.358976 | 3.301679 | 1.911669 | 1.727118 | 0.084146  | 0.143097  | 0        | 0        | 1.391463 | 4.464254 | 4.278221 | 4.019918 |
| 10930 | CYP4X1    | 8.488488 | 3.300913 | 1.248227 | 2.64448  | 0.008182  | 0.0199    | 0        | 0        | 4.87012  | 15.62489 | 21.39111 | 9.044815 |
| 7076  | LOC119620 | 14.87449 | 3.300327 | 0.891112 | 3.703606 | 0.000213  | 0.000799  | 0        | 2.189647 | 6.261582 | 22.32127 | 36.36488 | 22.10955 |
| 10613 | MMO2      | 5.545065 | 3.299875 | 1.214057 | 2.718056 | 0.006567  | 0.016449  | 1.084173 | 0.547412 | 1.391463 | 13.39276 | 12.83466 | 4.019918 |
| 18901 | CRYBA1    | 1.175406 | 3.29966  | 2.739253 | 1.204584 | 0.228364  | 0.321203  | 0.542086 | 0        | 0        | 2.232127 | 4.278221 | 0        |
| 18892 | LOC119620 | 1.176293 | 3.299628 | 2.738626 | 1.204848 | 0.228262  | 0.321094  | 0        | 0.547412 | 0        | 2.232127 | 4.278221 | 0        |
| 18893 | LOC119625 | 1.176293 | 3.299628 | 2.738626 | 1.204848 | 0.228262  | 0.321094  | 0        | 0.547412 | 0        | 2.232127 | 4.278221 | 0        |
| 18894 | LOC119625 | 1.176293 | 3.299628 | 2.738626 | 1.204848 | 0.228262  | 0.321094  | 0        | 0.547412 | 0        | 2.232127 | 4.278221 | 0        |
| 18896 | LOC103247 | 1.176293 | 3.299628 | 2.738626 | 1.204848 | 0.228262  | 0.321094  | 0        | 0.547412 | 0        | 2.232127 | 4.278221 | 0        |
| 18897 | LUZP4     | 1.176293 | 3.299628 | 2.738626 | 1.204848 | 0.228262  | 0.321094  | 0        | 0.547412 | 0        | 2.232127 | 4.278221 | 0        |
| 18898 | LOC119625 | 1.176293 | 3.299628 | 2.738626 | 1.204848 | 0.228262  | 0.321094  | 0        | 0.547412 | 0        | 2.232127 | 4.278221 | 0        |
| 18899 | LOC103246 | 1.176293 | 3.299628 | 2.738626 | 1.204848 | 0.228262  | 0.321094  | 0        | 0.547412 | 0        | 2.232127 | 4.278221 | 0        |
| 11691 | LYG2      | 4.329437 | 3.299042 | 1.333943 | 2.47315  | 0.013393  | 0.030455  | 0.542086 | 1.094824 | 0.695731 | 8.928508 | 10.69555 | 4.019918 |
| 18840 | LOC119620 | 1.201013 | 3.298722 | 2.721445 | 1.212122 | 0.225466  | 0.317985  | 0        | 0        | 0.695731 | 2.232127 | 4.278221 | 0        |
| 18841 | LOC119620 | 1.201013 | 3.298722 | 2.721445 | 1.212122 | 0.225466  | 0.317985  | 0        | 0        | 0.695731 | 2.232127 | 4.278221 | 0        |
| 18842 | LOC103245 | 1.201013 | 3.298722 | 2.721445 | 1.212122 | 0.225466  | 0.317985  | 0        | 0        | 0.695731 | 2.232127 | 4.278221 | 0        |
| 18845 | LOC103225 | 1.201013 | 3.298722 | 2.721445 | 1.212122 | 0.225466  | 0.317985  | 0        | 0        | 0.695731 | 2.232127 | 4.278221 | 0        |
| 18846 | LOC119625 | 1.201013 | 3.298722 | 2.721445 | 1.212122 | 0.225466  | 0.317985  | 0        | 0        | 0.695731 | 2.232127 | 4.278221 | 0        |
| 18848 | PRND      | 1.201013 | 3.298722 | 2.721445 | 1.212122 | 0.225466  | 0.317985  | 0        | 0        | 0.695731 | 2.232127 | 4.278221 | 0        |
| 18850 | DEFA5     | 1.201013 | 3.298722 | 2.721445 | 1.212122 | 0.225466  | 0.317985  | 0        | 0        | 0.695731 | 2.232127 | 4.278221 | 0        |
| 8662  | LOC119625 | 16.87474 | 3.298275 | 1.026458 | 3.213258 | 0.001312  | 0.004028  | 0        | 0.547412 | 9.044508 | 20.08914 | 53.47777 | 18.08963 |
| 4436  | LOC103245 | 32.84551 | 3.298195 | 0.652683 | 5.053285 | 4.34E-07  | 2.60E-06  | 1.084173 | 4.926706 | 12.52316 | 46.87467 | 83.42532 | 48.23901 |
| 9768  | LOC103225 | 6.641017 | 3.296918 | 1.132248 | 2.911833 | 0.003593  | 0.009779  | 1.084173 | 0.547412 | 2.087194 | 6.696381 | 21.39111 | 8.039836 |
| 9443  | LOC103235 | 11.99233 | 3.29577  | 1.099006 | 2.998864 | 0.00271   | 0.007629  | 0        | 0.547412 | 6.261582 | 35.71403 | 21.39111 | 8.039836 |
| 19636 | LOC119615 | 1.159903 | 3.295094 | 3.051946 | 1.07967  | 0.280289  | 0.379481  | 0.542086 | 0        | 0        | 0        | 6.417332 | 0        |
| 19632 | LOC119625 | 1.160791 | 3.295069 | 3.05117  | 1.079936 | 0.280171  | 0.379398  | 0        | 0.547412 | 0        | 0        | 6.417332 | 0        |
| 12856 | LOC119625 | 4.336347 | 3.295061 | 1.479153 | 2.227668 | 0.025903  | 0.053564  | 0        | 1.642235 | 0.695731 | 6.696381 | 14.97377 | 2.009959 |
| 19581 | APOA4     | 1.185511 | 3.294375 | 3.029927 | 1.087278 | 0.276914  | 0.375811  | 0        | 0        | 0.695731 | 0        | 6.417332 | 0        |
| 19582 | IL17C     | 1.185511 | 3.294375 | 3.029927 | 1.087278 | 0.276914  | 0.375811  | 0        | 0        | 0.695731 | 0        | 6.417332 | 0        |
| 19583 | LOC103224 | 1.185511 | 3.294375 | 3.029927 | 1.087278 | 0.276914  | 0.375811  | 0        | 0        | 0.695731 | 0        | 6.417332 | 0        |



|       |           |          |          |          |          |          |          |          |          |          |          |          |          |
|-------|-----------|----------|----------|----------|----------|----------|----------|----------|----------|----------|----------|----------|----------|
| 19584 | HMX1      | 1.185511 | 3.294375 | 3.029927 | 1.087278 | 0.276914 | 0.375811 | 0        | 0        | 0.695731 | 0        | 6.417332 | 0        |
| 19585 | ADAM2     | 1.185511 | 3.294375 | 3.029927 | 1.087278 | 0.276914 | 0.375811 | 0        | 0        | 0.695731 | 0        | 6.417332 | 0        |
| 19587 | LOC103231 | 1.185511 | 3.294375 | 3.029927 | 1.087278 | 0.276914 | 0.375811 | 0        | 0        | 0.695731 | 0        | 6.417332 | 0        |
| 19588 | LOC119620 | 1.185511 | 3.294375 | 3.029927 | 1.087278 | 0.276914 | 0.375811 | 0        | 0        | 0.695731 | 0        | 6.417332 | 0        |
| 19589 | CUNH16or  | 1.185511 | 3.294375 | 3.029927 | 1.087278 | 0.276914 | 0.375811 | 0        | 0        | 0.695731 | 0        | 6.417332 | 0        |
| 11141 | VIPR1     | 6.915087 | 3.293911 | 1.269995 | 2.59364  | 0.009497 | 0.022661 | 0        | 1.094824 | 2.782925 | 8.928508 | 25.66933 | 3.014938 |
| 15791 | LOC119624 | 2.396004 | 3.292675 | 1.933209 | 1.703218 | 0.088527 | 0.149012 | 0        | 0        | 1.391463 | 6.696381 | 4.278221 | 2.009959 |
| 15793 | NKX6-2    | 2.396004 | 3.292675 | 1.933209 | 1.703218 | 0.088527 | 0.149012 | 0        | 0        | 1.391463 | 6.696381 | 4.278221 | 2.009959 |
| 15794 | LOC103227 | 2.396004 | 3.292675 | 1.933209 | 1.703218 | 0.088527 | 0.149012 | 0        | 0        | 1.391463 | 6.696381 | 4.278221 | 2.009959 |
| 8804  | LOC119627 | 9.111965 | 3.291307 | 1.037341 | 3.17283  | 0.00151  | 0.004558 | 0.542086 | 1.094824 | 3.478657 | 17.85702 | 25.66933 | 6.029877 |
| 14672 | GHRH      | 4.095847 | 3.291055 | 1.737938 | 1.893655 | 0.058271 | 0.105585 | 1.084173 | 1.094824 | 0        | 0        | 21.39111 | 1.004979 |
| 16178 | LOC103216 | 2.159849 | 3.290756 | 2.018383 | 1.630392 | 0.103019 | 0.169289 | 0.542086 | 0        | 0.695731 | 6.696381 | 0        | 5.024897 |
| 8498  | CACNG2    | 19.33233 | 3.29039  | 1.010428 | 3.256433 | 0.001128 | 0.003529 | 0        | 0.547412 | 10.43597 | 53.57105 | 36.36488 | 15.07469 |
| 14032 | LOC103245 | 3.575492 | 3.290355 | 1.639247 | 2.007235 | 0.044725 | 0.084735 | 0        | 0        | 2.087194 | 8.928508 | 6.417332 | 4.019918 |
| 15315 | CTXN2     | 3.465924 | 3.290239 | 1.851645 | 1.776928 | 0.07558  | 0.131198 | 0.542086 | 0        | 1.391463 | 17.85702 | 0        | 1.004979 |
| 3302  | ZSCAN1    | 36.34999 | 3.290048 | 0.544935 | 6.037501 | 1.57E-09 | 1.26E-08 | 2.710432 | 10.40082 | 6.957314 | 73.66019 | 79.14709 | 45.22408 |
| 237   | SERPINA5  | 432.298  | 3.289336 | 0.174974 | 18.79896 | 7.70E-79 | 8.64E-77 | 86.19173 | 70.06871 | 85.57496 | 716.5128 | 737.9932 | 897.4467 |
| 9357  | LOC119627 | 6.495309 | 3.288901 | 1.090271 | 3.01659  | 0.002556 | 0.007263 | 1.084173 | 1.094824 | 1.391463 | 13.39276 | 14.97377 | 7.034856 |
| 6425  | LOC103228 | 34.73634 | 3.28889  | 0.828355 | 3.970388 | 7.18E-05 | 0.000297 | 0.542086 | 1.094824 | 18.08902 | 75.89232 | 70.59065 | 42.20914 |
| 7430  | LOC119619 | 9.735607 | 3.288604 | 0.916808 | 3.587014 | 0.000334 | 0.001197 | 1.626259 | 1.094824 | 2.782925 | 11.16063 | 25.66933 | 16.07967 |
| 8348  | KLK10     | 19.2798  | 3.28848  | 0.997426 | 3.296968 | 0.000977 | 0.003112 | 0        | 0.547412 | 10.43597 | 49.10679 | 38.50399 | 17.08465 |
| 13278 | NFAM1     | 39.21231 | 3.287858 | 1.527886 | 2.1519   | 0.031405 | 0.062879 | 0.542086 | 0.547412 | 20.87194 | 80.35657 | 104.8164 | 28.13943 |
| 10508 | LOC103247 | 7.722095 | 3.287724 | 1.198567 | 2.743045 | 0.006087 | 0.015401 | 2.168345 | 0        | 2.087194 | 13.39276 | 25.66933 | 3.014938 |
| 13890 | LOC119627 | 6.008948 | 3.287531 | 1.617734 | 2.032183 | 0.042135 | 0.080639 | 0        | 0        | 3.478657 | 0        | 23.53022 | 9.044815 |
| 7070  | LOC103234 | 12.38416 | 3.287272 | 0.887346 | 3.704611 | 0.000212 | 0.000796 | 0.542086 | 1.642235 | 4.87012  | 20.08914 | 32.08666 | 15.07469 |
| 26600 | LOC119626 | 0.524015 | 3.287001 | 3.974917 | 0.826936 | 0.408274 | NA       | 0        | 0        | 0        | 0        | 2.139111 | 1.004979 |
| 26630 | ANGPTL3   | 0.524015 | 3.287001 | 3.974917 | 0.826936 | 0.408274 | NA       | 0        | 0        | 0        | 0        | 2.139111 | 1.004979 |
| 26837 | LOC103235 | 0.524015 | 3.287001 | 3.974917 | 0.826936 | 0.408274 | NA       | 0        | 0        | 0        | 0        | 2.139111 | 1.004979 |
| 26880 | LOC103238 | 0.524015 | 3.287001 | 3.974917 | 0.826936 | 0.408274 | NA       | 0        | 0        | 0        | 0        | 2.139111 | 1.004979 |
| 26887 | LOC119620 | 0.524015 | 3.287001 | 3.974917 | 0.826936 | 0.408274 | NA       | 0        | 0        | 0        | 0        | 2.139111 | 1.004979 |
| 26912 | LOC103223 | 0.524015 | 3.287001 | 3.974917 | 0.826936 | 0.408274 | NA       | 0        | 0        | 0        | 0        | 2.139111 | 1.004979 |
| 26938 | LOC103223 | 0.524015 | 3.287001 | 3.974917 | 0.826936 | 0.408274 | NA       | 0        | 0        | 0        | 0        | 2.139111 | 1.004979 |
| 26967 | LOC119624 | 0.524015 | 3.287001 | 3.974917 | 0.826936 | 0.408274 | NA       | 0        | 0        | 0        | 0        | 2.139111 | 1.004979 |
| 26969 | LOC119624 | 0.524015 | 3.287001 | 3.974917 | 0.826936 | 0.408274 | NA       | 0        | 0        | 0        | 0        | 2.139111 | 1.004979 |
| 27012 | LOC119624 | 0.524015 | 3.287001 | 3.974917 | 0.826936 | 0.408274 | NA       | 0        | 0        | 0        | 0        | 2.139111 | 1.004979 |
| 27020 | HSD17B3   | 0.524015 | 3.287001 | 3.974917 | 0.826936 | 0.408274 | NA       | 0        | 0        | 0        | 0        | 2.139111 | 1.004979 |
| 27053 | LOC119624 | 0.524015 | 3.287001 | 3.974917 | 0.826936 | 0.408274 | NA       | 0        | 0        | 0        | 0        | 2.139111 | 1.004979 |
| 27095 | LOC103235 | 0.524015 | 3.287001 | 3.974917 | 0.826936 | 0.408274 | NA       | 0        | 0        | 0        | 0        | 2.139111 | 1.004979 |
| 27233 | UNC93A    | 0.524015 | 3.287001 | 3.974917 | 0.826936 | 0.408274 | NA       | 0        | 0        | 0        | 0        | 2.139111 | 1.004979 |
| 27403 | LOC119625 | 0.524015 | 3.287001 | 3.974917 | 0.826936 | 0.408274 | NA       | 0        | 0        | 0        | 0        | 2.139111 | 1.004979 |
| 27411 | LOC119625 | 0.524015 | 3.287001 | 3.974917 | 0.826936 | 0.408274 | NA       | 0        | 0        | 0        | 0        | 2.139111 | 1.004979 |
| 27451 | SPINK8    | 0.524015 | 3.287001 | 3.974917 | 0.826936 | 0.408274 | NA       | 0        | 0        | 0        | 0        | 2.139111 | 1.004979 |
| 27499 | LOC119626 | 0.524015 | 3.287001 | 3.974917 | 0.826936 | 0.408274 | NA       | 0        | 0        | 0        | 0        | 2.139111 | 1.004979 |
| 27526 | LOC119626 | 0.524015 | 3.287001 | 3.974917 | 0.826936 | 0.408274 | NA       | 0        | 0        | 0        | 0        | 2.139111 | 1.004979 |
| 27549 | CLDN25    | 0.524015 | 3.287001 | 3.974917 | 0.826936 | 0.408274 | NA       | 0        | 0        | 0        | 0        | 2.139111 | 1.004979 |
| 27593 | LOC103247 | 0.524015 | 3.287001 | 3.974917 | 0.826936 | 0.408274 | NA       | 0        | 0        | 0        | 0        | 2.139111 | 1.004979 |
| 27598 | HBB       | 0.524015 | 3.287001 | 3.974917 | 0.826936 | 0.408274 | NA       | 0        | 0        | 0        | 0        | 2.139111 | 1.004979 |
| 27622 | LOC119626 | 0.524015 | 3.287001 | 3.974917 | 0.826936 | 0.408274 | NA       | 0        | 0        | 0        | 0        | 2.139111 | 1.004979 |
| 27649 | POM121L2  | 0.524015 | 3.287001 | 3.974917 | 0.826936 | 0.408274 | NA       | 0        | 0        | 0        | 0        | 2.139111 | 1.004979 |
| 27668 | LOC103227 | 0.524015 | 3.287001 | 3.974917 | 0.826936 | 0.408274 | NA       | 0        | 0        | 0        | 0        | 2.139111 | 1.004979 |
| 27703 | LOC119627 | 0.524015 | 3.287001 | 3.974917 | 0.826936 | 0.408274 | NA       | 0        | 0        | 0        | 0        | 2.139111 | 1.004979 |
| 27715 | LOC119627 | 0.524015 | 3.287001 | 3.974917 | 0.826936 | 0.408274 | NA       | 0        | 0        | 0        | 0        | 2.139111 | 1.004979 |
| 27918 | LOC119628 | 0.524015 | 3.287001 | 3.974917 | 0.826936 | 0.408274 | NA       | 0        | 0        | 0        | 0        | 2.139111 | 1.004979 |
| 28060 | LOC119618 | 0.524015 | 3.287001 | 3.974917 | 0.826936 | 0.408274 | NA       | 0        | 0        | 0        | 0        | 2.139111 | 1.004979 |
| 28062 | LOC119618 | 0.524015 | 3.287001 | 3.974917 | 0.826936 | 0.408274 | NA       | 0        | 0        | 0        | 0        | 2.139111 | 1.004979 |
| 28075 | LOC119618 | 0.524015 | 3.287001 | 3.974917 | 0.826936 | 0.408274 | NA       | 0        | 0        | 0        | 0        | 2.139111 | 1.004979 |
| 28085 | WFDC12    | 0.524015 | 3.287001 | 3.974917 | 0.826936 | 0.408274 | NA       | 0        | 0        | 0        | 0        | 2.139111 | 1.004979 |
| 28179 | LOC119618 | 0.524015 | 3.287001 | 3.974917 | 0.826936 | 0.408274 | NA       | 0        | 0        | 0        | 0        | 2.139111 | 1.004979 |
| 28213 | LOC119618 | 0.524015 | 3.287001 | 3.974917 | 0.826936 | 0.408274 | NA       | 0        | 0        | 0        | 0        | 2.139111 | 1.004979 |
| 28244 | RD3L      | 0.524015 | 3.287001 | 3.974917 | 0.826936 | 0.408274 | NA       | 0        | 0        | 0        | 0        | 2.139111 | 1.004979 |
| 28255 | LOC119619 | 0.524015 | 3.287001 | 3.974917 | 0.826936 | 0.408274 | NA       | 0        | 0        | 0        | 0        | 2.139111 | 1.004979 |
| 28272 | LOC103219 | 0.524015 | 3.287001 | 3.974917 | 0.826936 | 0.408274 | NA       | 0        | 0        | 0        | 0        | 2.139111 | 1.004979 |
| 28313 | LOC119619 | 0.524015 | 3.287001 | 3.974917 | 0.826936 | 0.408274 | NA       | 0        | 0        | 0        | 0        | 2.139111 | 1.004979 |
| 28321 | LOC119619 | 0.524015 | 3.287001 | 3.974917 | 0.826936 | 0.408274 | NA       | 0        | 0        | 0        | 0        | 2.139111 | 1.004979 |
| 28370 | LOC119619 | 0.524015 | 3.287001 | 3.974917 | 0.826936 | 0.408274 | NA       | 0        | 0        | 0        | 0        | 2.139111 | 1.004979 |
| 28398 | LOC119619 | 0.524015 | 3.287001 | 3.974917 | 0.826936 | 0.408274 | NA       | 0        | 0        | 0        | 0        | 2.139111 | 1.004979 |
| 28422 | LOC103230 | 0.524015 | 3.287001 | 3.974917 | 0.826936 | 0.408274 | NA       | 0        | 0        | 0        | 0        | 2.139111 | 1.004979 |
| 28438 | LOC103247 | 0.524015 | 3.287001 | 3.974917 | 0.826936 | 0.408274 | NA       | 0        | 0        | 0        | 0        | 2.139111 | 1.004979 |
| 28549 | LOC103247 | 0.524015 | 3.287001 | 3.974917 | 0.826936 | 0.408274 | NA       | 0        | 0        | 0        | 0        | 2.139111 | 1.004979 |
| 28551 | LOC103233 | 0.524015 | 3.287001 | 3.974917 | 0.826936 | 0.408274 | NA       | 0        | 0        | 0        | 0        | 2.139111 | 1.004979 |
| 28558 | LOC119620 | 0.524015 | 3.287001 | 3.974917 | 0.826936 | 0.408274 | NA       | 0        | 0        | 0        | 0        | 2.139111 | 1.004979 |
| 28575 | LOC103233 | 0.524015 | 3.287001 | 3.974917 | 0.826936 | 0.408274 | NA       | 0        | 0        | 0        | 0        | 2.139111 | 1.004979 |
| 28603 | LOC119620 | 0.524015 | 3.287001 | 3.974917 | 0.826936 | 0.408274 | NA       | 0        | 0        | 0        | 0        | 2.139111 | 1.004979 |
| 28613 | LOC119620 | 0.524015 | 3.287001 | 3.974917 | 0.826936 | 0.408274 | NA       | 0        | 0        | 0        | 0        | 2.139111 | 1.004979 |



|       |           |          |          |          |          |          |          |          |          |          |          |          |          |
|-------|-----------|----------|----------|----------|----------|----------|----------|----------|----------|----------|----------|----------|----------|
| 28723 | LOC119620 | 0.524015 | 3.287001 | 3.974917 | 0.826936 | 0.408274 | NA       | 0        | 0        | 0        | 0        | 2.139111 | 1.004979 |
| 28771 | LOC119620 | 0.524015 | 3.287001 | 3.974917 | 0.826936 | 0.408274 | NA       | 0        | 0        | 0        | 0        | 2.139111 | 1.004979 |
| 28791 | LOC103230 | 0.524015 | 3.287001 | 3.974917 | 0.826936 | 0.408274 | NA       | 0        | 0        | 0        | 0        | 2.139111 | 1.004979 |
| 28800 | LOC119620 | 0.524015 | 3.287001 | 3.974917 | 0.826936 | 0.408274 | NA       | 0        | 0        | 0        | 0        | 2.139111 | 1.004979 |
| 28803 | LOC103220 | 0.524015 | 3.287001 | 3.974917 | 0.826936 | 0.408274 | NA       | 0        | 0        | 0        | 0        | 2.139111 | 1.004979 |
| 28819 | LOC119620 | 0.524015 | 3.287001 | 3.974917 | 0.826936 | 0.408274 | NA       | 0        | 0        | 0        | 0        | 2.139111 | 1.004979 |
| 28829 | LOC103210 | 0.524015 | 3.287001 | 3.974917 | 0.826936 | 0.408274 | NA       | 0        | 0        | 0        | 0        | 2.139111 | 1.004979 |
| 28912 | LOC103220 | 0.524015 | 3.287001 | 3.974917 | 0.826936 | 0.408274 | NA       | 0        | 0        | 0        | 0        | 2.139111 | 1.004979 |
| 28937 | LOC103230 | 0.524015 | 3.287001 | 3.974917 | 0.826936 | 0.408274 | NA       | 0        | 0        | 0        | 0        | 2.139111 | 1.004979 |
| 28971 | LOC103240 | 0.524015 | 3.287001 | 3.974917 | 0.826936 | 0.408274 | NA       | 0        | 0        | 0        | 0        | 2.139111 | 1.004979 |
| 29077 | SCP2D1    | 0.524015 | 3.287001 | 3.974917 | 0.826936 | 0.408274 | NA       | 0        | 0        | 0        | 0        | 2.139111 | 1.004979 |
| 29098 | LOC119620 | 0.524015 | 3.287001 | 3.974917 | 0.826936 | 0.408274 | NA       | 0        | 0        | 0        | 0        | 2.139111 | 1.004979 |
| 29175 | LOC119620 | 0.524015 | 3.287001 | 3.974917 | 0.826936 | 0.408274 | NA       | 0        | 0        | 0        | 0        | 2.139111 | 1.004979 |
| 29237 | LOC119620 | 0.524015 | 3.287001 | 3.974917 | 0.826936 | 0.408274 | NA       | 0        | 0        | 0        | 0        | 2.139111 | 1.004979 |
| 29415 | LOC103240 | 0.524015 | 3.287001 | 3.974917 | 0.826936 | 0.408274 | NA       | 0        | 0        | 0        | 0        | 2.139111 | 1.004979 |
| 26594 | LOC119620 | 0.539518 | 3.286943 | 3.931957 | 0.835956 | 0.40318  | NA       | 0        | 0        | 0        | 2.232127 | 0        | 1.004979 |
| 26606 | LOC103220 | 0.539518 | 3.286943 | 3.931957 | 0.835956 | 0.40318  | NA       | 0        | 0        | 0        | 2.232127 | 0        | 1.004979 |
| 26662 | LOC119610 | 0.539518 | 3.286943 | 3.931957 | 0.835956 | 0.40318  | NA       | 0        | 0        | 0        | 2.232127 | 0        | 1.004979 |
| 26680 | IL17B     | 0.539518 | 3.286943 | 3.931957 | 0.835956 | 0.40318  | NA       | 0        | 0        | 0        | 2.232127 | 0        | 1.004979 |
| 26780 | IL2       | 0.539518 | 3.286943 | 3.931957 | 0.835956 | 0.40318  | NA       | 0        | 0        | 0        | 2.232127 | 0        | 1.004979 |
| 26847 | LOC119620 | 0.539518 | 3.286943 | 3.931957 | 0.835956 | 0.40318  | NA       | 0        | 0        | 0        | 2.232127 | 0        | 1.004979 |
| 26870 | LOC119620 | 0.539518 | 3.286943 | 3.931957 | 0.835956 | 0.40318  | NA       | 0        | 0        | 0        | 2.232127 | 0        | 1.004979 |
| 26941 | LOC103220 | 0.539518 | 3.286943 | 3.931957 | 0.835956 | 0.40318  | NA       | 0        | 0        | 0        | 2.232127 | 0        | 1.004979 |
| 26981 | LOC103210 | 0.539518 | 3.286943 | 3.931957 | 0.835956 | 0.40318  | NA       | 0        | 0        | 0        | 2.232127 | 0        | 1.004979 |
| 26992 | LOC119620 | 0.539518 | 3.286943 | 3.931957 | 0.835956 | 0.40318  | NA       | 0        | 0        | 0        | 2.232127 | 0        | 1.004979 |
| 27018 | LOC119620 | 0.539518 | 3.286943 | 3.931957 | 0.835956 | 0.40318  | NA       | 0        | 0        | 0        | 2.232127 | 0        | 1.004979 |
| 27058 | LOC103230 | 0.539518 | 3.286943 | 3.931957 | 0.835956 | 0.40318  | NA       | 0        | 0        | 0        | 2.232127 | 0        | 1.004979 |
| 27070 | LOC103230 | 0.539518 | 3.286943 | 3.931957 | 0.835956 | 0.40318  | NA       | 0        | 0        | 0        | 2.232127 | 0        | 1.004979 |
| 27121 | LOC119620 | 0.539518 | 3.286943 | 3.931957 | 0.835956 | 0.40318  | NA       | 0        | 0        | 0        | 2.232127 | 0        | 1.004979 |
| 27208 | LOC119620 | 0.539518 | 3.286943 | 3.931957 | 0.835956 | 0.40318  | NA       | 0        | 0        | 0        | 2.232127 | 0        | 1.004979 |
| 27318 | LOC119620 | 0.539518 | 3.286943 | 3.931957 | 0.835956 | 0.40318  | NA       | 0        | 0        | 0        | 2.232127 | 0        | 1.004979 |
| 27339 | SPACA1    | 0.539518 | 3.286943 | 3.931957 | 0.835956 | 0.40318  | NA       | 0        | 0        | 0        | 2.232127 | 0        | 1.004979 |
| 27357 | LOC103240 | 0.539518 | 3.286943 | 3.931957 | 0.835956 | 0.40318  | NA       | 0        | 0        | 0        | 2.232127 | 0        | 1.004979 |
| 27416 | LOC119620 | 0.539518 | 3.286943 | 3.931957 | 0.835956 | 0.40318  | NA       | 0        | 0        | 0        | 2.232127 | 0        | 1.004979 |
| 27420 | LOC103220 | 0.539518 | 3.286943 | 3.931957 | 0.835956 | 0.40318  | NA       | 0        | 0        | 0        | 2.232127 | 0        | 1.004979 |
| 27529 | LOC119620 | 0.539518 | 3.286943 | 3.931957 | 0.835956 | 0.40318  | NA       | 0        | 0        | 0        | 2.232127 | 0        | 1.004979 |
| 27538 | LOC103240 | 0.539518 | 3.286943 | 3.931957 | 0.835956 | 0.40318  | NA       | 0        | 0        | 0        | 2.232127 | 0        | 1.004979 |
| 27599 | LOC119620 | 0.539518 | 3.286943 | 3.931957 | 0.835956 | 0.40318  | NA       | 0        | 0        | 0        | 2.232127 | 0        | 1.004979 |
| 27636 | TRNAA-CG  | 0.539518 | 3.286943 | 3.931957 | 0.835956 | 0.40318  | NA       | 0        | 0        | 0        | 2.232127 | 0        | 1.004979 |
| 27670 | LOC119620 | 0.539518 | 3.286943 | 3.931957 | 0.835956 | 0.40318  | NA       | 0        | 0        | 0        | 2.232127 | 0        | 1.004979 |
| 27743 | LOC119620 | 0.539518 | 3.286943 | 3.931957 | 0.835956 | 0.40318  | NA       | 0        | 0        | 0        | 2.232127 | 0        | 1.004979 |
| 27867 | LOC119620 | 0.539518 | 3.286943 | 3.931957 | 0.835956 | 0.40318  | NA       | 0        | 0        | 0        | 2.232127 | 0        | 1.004979 |
| 27929 | LOC119620 | 0.539518 | 3.286943 | 3.931957 | 0.835956 | 0.40318  | NA       | 0        | 0        | 0        | 2.232127 | 0        | 1.004979 |
| 27999 | LOC119610 | 0.539518 | 3.286943 | 3.931957 | 0.835956 | 0.40318  | NA       | 0        | 0        | 0        | 2.232127 | 0        | 1.004979 |
| 28061 | LOC119610 | 0.539518 | 3.286943 | 3.931957 | 0.835956 | 0.40318  | NA       | 0        | 0        | 0        | 2.232127 | 0        | 1.004979 |
| 28080 | LOC119610 | 0.539518 | 3.286943 | 3.931957 | 0.835956 | 0.40318  | NA       | 0        | 0        | 0        | 2.232127 | 0        | 1.004979 |
| 28109 | CST9L     | 0.539518 | 3.286943 | 3.931957 | 0.835956 | 0.40318  | NA       | 0        | 0        | 0        | 2.232127 | 0        | 1.004979 |
| 28141 | LOC119610 | 0.539518 | 3.286943 | 3.931957 | 0.835956 | 0.40318  | NA       | 0        | 0        | 0        | 2.232127 | 0        | 1.004979 |
| 28198 | LOC119610 | 0.539518 | 3.286943 | 3.931957 | 0.835956 | 0.40318  | NA       | 0        | 0        | 0        | 2.232127 | 0        | 1.004979 |
| 28207 | LOC119610 | 0.539518 | 3.286943 | 3.931957 | 0.835956 | 0.40318  | NA       | 0        | 0        | 0        | 2.232127 | 0        | 1.004979 |
| 28214 | LOC119610 | 0.539518 | 3.286943 | 3.931957 | 0.835956 | 0.40318  | NA       | 0        | 0        | 0        | 2.232127 | 0        | 1.004979 |
| 28282 | LOC103220 | 0.539518 | 3.286943 | 3.931957 | 0.835956 | 0.40318  | NA       | 0        | 0        | 0        | 2.232127 | 0        | 1.004979 |
| 28302 | LOC119610 | 0.539518 | 3.286943 | 3.931957 | 0.835956 | 0.40318  | NA       | 0        | 0        | 0        | 2.232127 | 0        | 1.004979 |
| 28308 | SLC6A19   | 0.539518 | 3.286943 | 3.931957 | 0.835956 | 0.40318  | NA       | 0        | 0        | 0        | 2.232127 | 0        | 1.004979 |
| 28446 | LOC119620 | 0.539518 | 3.286943 | 3.931957 | 0.835956 | 0.40318  | NA       | 0        | 0        | 0        | 2.232127 | 0        | 1.004979 |
| 28487 | LOC119620 | 0.539518 | 3.286943 | 3.931957 | 0.835956 | 0.40318  | NA       | 0        | 0        | 0        | 2.232127 | 0        | 1.004979 |
| 28567 | LOC103230 | 0.539518 | 3.286943 | 3.931957 | 0.835956 | 0.40318  | NA       | 0        | 0        | 0        | 2.232127 | 0        | 1.004979 |
| 28638 | LOC119620 | 0.539518 | 3.286943 | 3.931957 | 0.835956 | 0.40318  | NA       | 0        | 0        | 0        | 2.232127 | 0        | 1.004979 |
| 28651 | LOC119620 | 0.539518 | 3.286943 | 3.931957 | 0.835956 | 0.40318  | NA       | 0        | 0        | 0        | 2.232127 | 0        | 1.004979 |
| 28737 | LOC103240 | 0.539518 | 3.286943 | 3.931957 | 0.835956 | 0.40318  | NA       | 0        | 0        | 0        | 2.232127 | 0        | 1.004979 |
| 29101 | LOC119620 | 0.539518 | 3.286943 | 3.931957 | 0.835956 | 0.40318  | NA       | 0        | 0        | 0        | 2.232127 | 0        | 1.004979 |
| 29105 | LOC119620 | 0.539518 | 3.286943 | 3.931957 | 0.835956 | 0.40318  | NA       | 0        | 0        | 0        | 2.232127 | 0        | 1.004979 |
| 29198 | LOC119620 | 0.539518 | 3.286943 | 3.931957 | 0.835956 | 0.40318  | NA       | 0        | 0        | 0        | 2.232127 | 0        | 1.004979 |
| 29209 | LOC103220 | 0.539518 | 3.286943 | 3.931957 | 0.835956 | 0.40318  | NA       | 0        | 0        | 0        | 2.232127 | 0        | 1.004979 |
| 29320 | LOC119620 | 0.539518 | 3.286943 | 3.931957 | 0.835956 | 0.40318  | NA       | 0        | 0        | 0        | 2.232127 | 0        | 1.004979 |
| 29585 | LOC103220 | 0.539518 | 3.286943 | 3.931957 | 0.835956 | 0.40318  | NA       | 0        | 0        | 0        | 2.232127 | 0        | 1.004979 |
| 8418  | SLC30A10  | 10.26045 | 3.286943 | 1.003054 | 3.276934 | 0.001049 | 0.003314 | 0.542086 | 1.094824 | 4.174388 | 15.62489 | 32.08666 | 8.039836 |
| 5955  | LOC103220 | 16.86658 | 3.286631 | 0.785511 | 4.184068 | 2.86E-05 | 0.000128 | 2.168345 | 1.094824 | 6.261582 | 44.64254 | 29.94755 | 17.08465 |
| 15467 | KLK12     | 2.145234 | 3.286395 | 1.877765 | 1.750163 | 0.08009  | 0.137661 | 0        | 0.547412 | 0.695731 | 4.464254 | 2.139111 | 5.024897 |
| 14373 | LOC103210 | 3.61252  | 3.285627 | 1.686024 | 1.948742 | 0.051326 | 0.094935 | 0        | 0        | 2.087194 | 11.16063 | 6.417332 | 2.009959 |
| 4989  | KCNC1     | 27.21748 | 3.285425 | 0.699695 | 4.695511 | 2.66E-06 | 1.42E-05 | 2.168345 | 2.737059 | 10.43597 | 66.96381 | 59.8951  | 21.10457 |
| 15817 | ZNRF4     | 2.380501 | 3.284534 | 1.93544  | 1.697048 | 0.089688 | 0.150746 | 0        | 0        | 1.391463 | 4.464254 | 6.417332 | 2.009959 |
| 5678  | SOX5      | 42.17455 | 3.283594 | 0.756996 | 4.337665 | 1.44E-05 | 6.74E-05 | 1.084173 | 3.284471 | 19.48048 | 78.12444 | 121.9293 | 29.1444  |
| 16860 | GAST      | 2.433032 | 3.282807 | 2.169702 | 1.513022 | 0.130274 | 0.205417 | 0        | 0        | 1.391463 | 8.928508 | 4.278221 | 0        |



|       |           |          |          |          |          |           |           |          |          |          |          |          |          |
|-------|-----------|----------|----------|----------|----------|-----------|-----------|----------|----------|----------|----------|----------|----------|
| 191   | LRRC31    | 427.2524 | 3.281601 | 0.160071 | 20.50087 | 2.11E-93  | 2.94E-91  | 71.5554  | 82.65918 | 85.57496 | 772.3159 | 744.4105 | 806.9985 |
| 7700  | NKX2-3    | 12.44873 | 3.280044 | 0.938883 | 3.493561 | 0.000477  | 0.001646  | 0.542086 | 1.642235 | 4.87012  | 20.08914 | 38.50399 | 9.044815 |
| 4528  | TBC1D10C  | 27.78335 | 3.279883 | 0.65633  | 4.997307 | 5.81E-07  | 3.41E-06  | 4.336691 | 1.642235 | 9.740239 | 49.10679 | 72.72976 | 29.1444  |
| 12080 | RASSF10   | 7.240543 | 3.278458 | 1.371303 | 2.390761 | 0.016813  | 0.037002  | 0        | 0        | 4.174388 | 24.5534  | 10.69555 | 4.019918 |
| 10197 | ISLR2     | 52.18009 | 3.278343 | 1.163864 | 2.816774 | 0.004851  | 0.012647  | 1.626259 | 2.737059 | 25.04633 | 102.6778 | 134.764  | 46.22906 |
| 7561  | LOC10322C | 9.800813 | 3.278235 | 0.926714 | 3.537481 | 0.000404  | 0.00142   | 1.626259 | 0.547412 | 3.478657 | 20.08914 | 14.97377 | 18.08963 |
| 14218 | LOC11962E | 3.544487 | 3.277793 | 1.660647 | 1.973805 | 0.048404  | 0.090506  | 0        | 0        | 2.087194 | 4.464254 | 10.69555 | 4.019918 |
| 9551  | FXYD3     | 7.797927 | 3.277434 | 1.102737 | 2.972089 | 0.002958  | 0.008233  | 0        | 1.094824 | 3.478657 | 11.16063 | 14.97377 | 16.07967 |
| 5094  | LOC11962E | 40.47388 | 3.277315 | 0.707552 | 4.631908 | 3.62E-06  | 1.89E-05  | 1.626259 | 3.284471 | 18.08902 | 89.28508 | 98.39909 | 32.15934 |
| 14427 | SPATA16   | 3.507459 | 3.276921 | 1.689953 | 1.939061 | 0.052494  | 0.096732  | 0        | 0        | 2.087194 | 2.232127 | 10.69555 | 6.029877 |
| 10885 | NLRP2     | 9.304644 | 3.276572 | 1.235084 | 2.652915 | 0.00798   | 0.01949   | 0        | 1.094824 | 4.174388 | 35.71403 | 12.83466 | 2.009959 |
| 13001 | CABP2     | 4.723975 | 3.27656  | 1.487124 | 2.203286 | 0.027575  | 0.056381  | 0        | 0        | 2.782925 | 6.696381 | 12.83466 | 6.029877 |
| 16697 | RAX2      | 2.306445 | 3.275768 | 2.122884 | 1.543075 | 0.122813  | 0.195543  | 0        | 0        | 1.391463 | 0        | 6.417332 | 6.029877 |
| 7442  | LOC11962E | 9.395907 | 3.275449 | 0.913863 | 3.584178 | 0.000338  | 0.001208  | 2.710432 | 1.094824 | 1.391463 | 17.85702 | 19.252   | 14.06971 |
| 14422 | SLC14A2   | 3.581515 | 3.274298 | 1.688033 | 1.939712 | 0.052415  | 0.096619  | 0        | 0        | 2.087194 | 6.696381 | 10.69555 | 2.009959 |
| 16045 | LOC11962E | 2.364999 | 3.274276 | 1.975348 | 1.657569 | 0.097405  | 0.161398  | 0        | 0        | 1.391463 | 2.232127 | 8.556443 | 2.009959 |
| 139   | HNMT      | 610.2359 | 3.272883 | 0.143644 | 22.78465 | 6.51E-115 | 1.25E-112 | 111.6698 | 118.241  | 112.7085 | 1216.509 | 1063.138 | 1039.149 |
| 18336 | LOC11962E | 2.042576 | 3.272799 | 2.562182 | 1.277348 | 0.201479  | 0.292128  | 0        | 1.094824 | 0        | 11.16063 | 0        | 0        |
| 8389  | LOC10322E | 9.806206 | 3.272711 | 0.995988 | 3.285895 | 0.001017  | 0.003222  | 1.626259 | 1.094824 | 2.782925 | 8.928508 | 36.36488 | 8.039836 |
| 6783  | ZNFR814   | 13.82837 | 3.271111 | 0.855283 | 3.824594 | 0.000131  | 0.000513  | 4.336691 | 0.547412 | 2.782925 | 29.01765 | 34.22577 | 12.05975 |
| 13609 | TBC1D21   | 3.383275 | 3.271088 | 1.566574 | 2.088052 | 0.036793  | 0.071875  | 0        | 0.547412 | 1.391463 | 8.928508 | 6.417332 | 3.014938 |
| 10906 | GRIN2B    | 48.74234 | 3.270145 | 1.234145 | 2.649726 | 0.008056  | 0.019637  | 1.084173 | 2.189647 | 24.3506  | 91.51721 | 124.0684 | 49.24399 |
| 694   | PCSK6     | 157.3522 | 3.270076 | 0.254444 | 12.85185 | 8.40E-38  | 3.22E-36  | 28.18849 | 36.12918 | 24.3506  | 267.8552 | 260.9715 | 326.6183 |
| 13248 | LOC11961E | 40.07785 | 3.269869 | 1.51522  | 2.158016 | 0.030927  | 0.062061  | 0        | 0        | 2.782925 | 4.464254 | 14.97377 | 6.029877 |
| 10104 | LOC10322E | 7.262718 | 3.268524 | 1.151879 | 2.837557 | 0.004546  | 0.011961  | 2.710432 | 0.547412 | 0.695731 | 8.928508 | 25.66933 | 5.024897 |
| 9898  | GNA15     | 10.22724 | 3.268214 | 1.132777 | 2.885136 | 0.003912  | 0.010508  | 1.626259 | 0        | 4.174388 | 29.01765 | 23.53022 | 3.014938 |
| 14143 | DEFB116   | 3.420303 | 3.266013 | 1.643871 | 1.986782 | 0.046947  | 0.088247  | 0        | 0.547412 | 1.391463 | 11.16063 | 6.417332 | 1.004979 |
| 1715  | ADAMTS2   | 62.39367 | 3.265811 | 0.375861 | 8.688872 | 3.66E-18  | 5.67E-17  | 8.673382 | 12.04306 | 14.61036 | 122.767  | 119.7902 | 96.47803 |
| 3002  | B3GNT3    | 40.07785 | 3.265682 | 0.509034 | 6.415453 | 1.40E-10  | 1.24E-09  | 4.336691 | 6.02153  | 12.52316 | 69.19594 | 94.12087 | 54.26889 |
| 13850 | LOC11962E | 3.315242 | 3.265462 | 1.600824 | 2.039863 | 0.041364  | 0.079392  | 0        | 0.547412 | 1.391463 | 2.232127 | 10.69555 | 5.024897 |
| 10755 | GJA9      | 6.788076 | 3.265451 | 1.219237 | 2.678275 | 0.0074    | 0.018291  | 0        | 1.094824 | 2.782925 | 17.85702 | 14.97377 | 4.019918 |
| 15423 | GABRR3    | 2.166759 | 3.264544 | 1.858172 | 1.756857 | 0.078942  | 0.136074  | 0        | 0.547412 | 0.695731 | 4.464254 | 4.278221 | 3.014938 |
| 12115 | BPIFB2    | 4.333519 | 3.26369  | 1.369751 | 2.382689 | 0.017187  | 0.037714  | 0        | 1.094824 | 1.391463 | 8.928508 | 8.556443 | 6.029877 |
| 6819  | KHDC1L    | 10.58125 | 3.262819 | 0.85639  | 3.80997  | 0.000139  | 0.000542  | 1.084173 | 2.189647 | 2.782925 | 20.08914 | 19.252   | 18.08963 |
| 17665 | LOC10324E | 36.76157 | 3.262287 | 2.342424 | 1.392697 | 0.163711  | 0.246378  | 0        | 0        | 20.87194 | 64.73168 | 104.8164 | 30.14938 |
| 12588 | TRIM15    | 5.872457 | 3.262122 | 1.427014 | 2.285978 | 0.022256  | 0.047002  | 0        | 0        | 3.478657 | 4.464254 | 19.252   | 8.039836 |
| 8526  | LOC10322E | 18.91423 | 3.26093  | 1.004107 | 3.247591 | 0.001164  | 0.003629  | 0        | 0.547412 | 10.43597 | 26.78552 | 55.61688 | 20.09959 |
| 11205 | LOC10321E | 6.918282 | 3.260591 | 1.262888 | 2.581853 | 0.009827  | 0.023316  | 0        | 0.547412 | 3.478657 | 8.928508 | 23.53022 | 5.024897 |
| 12147 | HOXC11    | 7.147526 | 3.260494 | 1.372195 | 2.376115 | 0.017496  | 0.038292  | 0        | 0        | 4.174388 | 11.16063 | 23.53022 | 4.019918 |
| 3987  | LOC23A1   | 38.77312 | 3.260138 | 0.605644 | 5.382927 | 7.33E-08  | 4.89E-07  | 3.794605 | 7.663765 | 10.43597 | 66.96381 | 11.6511  | 26.12947 |
| 12982 | LOC10322E | 4.027556 | 3.259563 | 1.476898 | 2.207034 | 0.027312  | 0.05593   | 1.626259 | 0        | 0.695731 | 2.232127 | 8.556443 | 11.05477 |
| 12507 | LOC10322E | 5.447377 | 3.259321 | 1.41702  | 2.300124 | 0.021441  | 0.045576  | 0        | 1.642235 | 1.391463 | 20.08914 | 8.556443 | 1.004979 |
| 7897  | SEZ6      | 13.45559 | 3.259031 | 0.947002 | 3.441418 | 0.000579  | 0.001948  | 0        | 2.189647 | 5.565851 | 24.5534  | 36.36488 | 12.05975 |
| 11821 | LYZL4     | 4.369659 | 3.258882 | 1.333739 | 2.443418 | 0.014549  | 0.032717  | 0.542086 | 0.547412 | 1.391463 | 11.16063 | 8.556443 | 4.019918 |
| 10434 | LOC10323E | 6.302039 | 3.258146 | 1.18085  | 2.759154 | 0.005795  | 0.014766  | 0        | 2.189647 | 1.391463 | 15.62489 | 8.556443 | 10.04979 |
| 14644 | LOC11962E | 2.84382  | 3.257831 | 1.716535 | 1.897911 | 0.057708  | 0.104764  | 0.542086 | 1.094824 | 0        | 2.232127 | 2.139111 | 11.05477 |
| 7162  | NR1I2     | 12.02444 | 3.257606 | 0.886141 | 3.676171 | 0.000237  | 0.000879  | 0.542086 | 2.189647 | 4.174388 | 20.08914 | 32.08666 | 13.06473 |
| 15615 | LRRC10    | 2.151257 | 3.256082 | 1.88471  | 1.72763  | 0.084055  | 0.143097  | 0        | 0.547412 | 0.695731 | 2.232127 | 6.417332 | 3.014938 |
| 15637 | LOC10324E | 2.151257 | 3.256082 | 1.88471  | 1.72763  | 0.084055  | 0.143097  | 0        | 0.547412 | 0.695731 | 2.232127 | 6.417332 | 3.014938 |
| 865   | LOC10324E | 109.248  | 3.255538 | 0.278181 | 11.70296 | 1.23E-31  | 3.78E-30  | 18.97302 | 20.25424 | 22.95914 | 200.8914 | 207.4937 | 184.9162 |
| 15029 | LOC11961E | 2.933379 | 3.255226 | 1.780936 | 1.827818 | 0.067577  | 0.119542  | 0.542086 | 1.094824 | 0        | 8.928508 | 0        | 7.034856 |
| 4898  | KRT9      | 44.75581 | 3.255095 | 0.686216 | 4.743545 | 2.10E-06  | 1.14E-05  | 0.542086 | 7.116354 | 18.08902 | 75.89232 | 117.6511 | 49.24399 |
| 5853  | LOC10322E | 25.88599 | 3.255068 | 0.766996 | 4.243917 | 2.20E-05  | 9.98E-05  | 0.542086 | 3.284471 | 11.1317  | 44.64254 | 70.59065 | 25.12449 |
| 884   | TM4SF19   | 120.9089 | 3.255024 | 0.281209 | 11.57512 | 5.51E-31  | 1.66E-29  | 21.68345 | 19.15941 | 28.52499 | 238.8376 | 186.1026 | 231.1453 |
| 8382  | LOC10324E | 20.07177 | 3.254372 | 0.989534 | 2.388791 | 0.001006  | 0.003191  | 0        | 0.547412 | 11.1317  | 46.87467 | 47.82221 | 19.09461 |
| 13325 | WFDC1     | 3.168646 | 3.253907 | 1.51833  | 2.143083 | 0.032106  | 0.064056  | 0.542086 | 0.547412 | 0.695731 | 8.928508 | 4.278221 | 4.019918 |
| 17605 | TRNAV-AA  | 2.025299 | 3.253744 | 2.322091 | 1.401213 | 0.16115   | 0.24309   | 1.084173 | 0        | 0        | 8.928508 | 2.139111 | 0        |
| 6499  | KCNH8     | 15.54275 | 3.25282  | 0.825563 | 3.940122 | 8.14E-05  | 0.000333  | 2.168345 | 4.379295 | 2.087194 | 20.08914 | 53.47777 | 11.05477 |
| 7744  | RAX       | 11.9968  | 3.252371 | 0.934573 | 3.480061 | 0.000501  | 0.001721  | 2.168345 | 0.547412 | 4.174388 | 13.39276 | 40.6431  | 11.05477 |
| 15806 | LOC10322E | 2.203787 | 3.250949 | 1.912617 | 1.699739 | 0.08918   | 0.149997  | 0        | 0.547412 | 0.695731 | 6.696381 | 4.278221 | 1.004979 |
| 11717 | SYCP2L    | 5.394846 | 3.250634 | 1.317466 | 2.467338 | 0.013612  | 0.030885  | 0        | 1.642235 | 1.391463 | 15.62489 | 10.69555 | 3.014938 |
| 8452  | IQANK1    | 9.847316 | 3.250593 | 0.994613 | 3.2682   | 0.001082  | 0.003404  | 1.084173 | 1.094824 | 3.478657 | 11.16063 | 34.22577 | 8.039836 |
| 2959  | OTOGL     | 32.1456  | 3.249167 | 0.501399 | 6.480208 | 9.16E-11  | 8.23E-10  | 6.505036 | 5.474118 | 6.261582 | 55.80317 | 70.59065 | 48.23901 |
| 14370 | GSTA3     | 3.373795 | 3.248893 | 1.667103 | 1.948825 | 0.051316  | 0.09493   | 0        | 0.547412 | 1.391463 | 4.464254 | 12.83466 | 1.004979 |
| 11380 | ARMC3     | 5.289785 | 3.247867 | 1.277736 | 2.541892 | 0.011025  | 0.025754  | 0        | 1.642235 | 1.391463 | 6.696381 | 14.97377 | 7.034856 |
| 7211  | TNR       | 15.85301 | 3.246779 | 0.886292 | 3.663329 | 0.000249  | 0.000918  | 1.084173 | 0.547412 | 7.653045 | 31.24978 | 38.50399 | 16.07967 |
| 12642 | ENPP6     | 4.324039 | 3.245839 | 1.428539 | 2.27214  | 0.023078  | 0.048531  | 0        | 1.094824 | 1.391463 | 4.464254 | 14.97377 | 4.019918 |
| 6389  | LOC11962E | 20.23472 | 3.245799 | 0.81486  | 3.98326  | 6.80E-05  | 0.000283  | 1.626259 | 1.094824 | 9.044508 | 37.94616 | 55.61688 | 16.07967 |
| 9381  | NMBR      | 7.734604 | 3.245632 | 1.077477 | 3.012252 | 0.002593  | 0.007349  | 0.542086 | 0.547412 | 3.478657 | 20.08914 | 10.69555 | 11.05477 |
| 10743 | LOC11961E | 6.400981 | 3.245628 | 1.210445 | 2.681351 | 0.007333  | 0.018145  | 1.626259 | 0.547412 | 1.391463 | 17.85702 | 14.97377 | 2.009959 |
| 8553  | LOC11962E | 9.338607 | 3.245578 | 1.001718 | 2.340013 | 0.001195  | 0.003715  | 3.252518 | 0.547412 | 1.391463 | 24.5534  | 19.252   | 7.034856 |
| 136   |           |          |          |          |          |           |           |          |          |          |          |          |          |



|       |           |          |          |          |          |           |           |          |          |          |          |          |          |
|-------|-----------|----------|----------|----------|----------|-----------|-----------|----------|----------|----------|----------|----------|----------|
| 15008 | LOC119621 | 2.955792 | 3.242393 | 1.769728 | 1.832141 | 0.06693   | 0.118563  | 0        | 1.642235 | 0        | 8.928508 | 2.139111 | 5.024897 |
| 14432 | SLC24A3   | 23.8212  | 3.242241 | 1.67269  | 1.93834  | 0.052582  | 0.096865  | 0        | 0.547412 | 13.2189  | 35.71403 | 66.31243 | 27.13445 |
| 8821  | ADGRG4    | 16.00892 | 3.24219  | 1.023661 | 3.16725  | 0.001539  | 0.004638  | 0        | 1.642235 | 7.653045 | 37.94616 | 42.78221 | 6.029877 |
| 5122  | LOC119621 | 17.60482 | 3.241315 | 0.701922 | 4.617771 | 3.88E-06  | 2.01E-05  | 3.794605 | 3.284471 | 2.782925 | 40.17829 | 38.50399 | 17.08465 |
| 14048 | PTPN20    | 3.191059 | 3.241108 | 1.616391 | 2.005151 | 0.044947  | 0.085053  | 0        | 1.094824 | 0.695731 | 8.928508 | 6.417332 | 2.009959 |
| 14049 | LOC103234 | 3.191059 | 3.241108 | 1.616391 | 2.005151 | 0.044947  | 0.085053  | 0        | 1.094824 | 0.695731 | 8.928508 | 6.417332 | 2.009959 |
| 7538  | PRKG2     | 15.64707 | 3.240876 | 0.913807 | 3.546566 | 0.00039   | 0.001376  | 0        | 2.189647 | 6.957314 | 29.01765 | 40.6431  | 15.07469 |
| 10    | ASAH1     | 11454.58 | 3.240573 | 0.082545 | 39.25833 | 0         | 0         | 2175.393 | 2242.746 | 2158.159 | 20591.37 | 19955.76 | 21604.04 |
| 14078 | IQCM      | 2.902374 | 3.240334 | 1.621758 | 1.998038 | 0.045713  | 0.086316  | 0.542086 | 1.094824 | 0        | 4.464254 | 4.278221 | 7.034856 |
| 4973  | MYOG      | 27.40446 | 3.239685 | 0.689072 | 4.70152  | 2.58E-06  | 1.38E-05  | 3.252518 | 1.642235 | 11.1317  | 78.12444 | 32.08666 | 38.18922 |
| 15950 | TEX37     | 1.95213  | 3.238286 | 1.931943 | 1.67618  | 0.093703  | 0.156181  | 0.542086 | 0.547412 | 0        | 4.464254 | 2.139111 | 4.019918 |
| 7533  | CUNH4orf1 | 25.57247 | 3.238258 | 0.912653 | 3.548183 | 0.000388  | 0.001369  | 0        | 1.094824 | 13.91463 | 55.80317 | 53.47777 | 29.1444  |
| 9056  | CDR1      | 10.09101 | 3.237261 | 1.046551 | 3.093265 | 0.00198   | 0.005812  | 0        | 1.094824 | 4.87012  | 17.85702 | 25.66933 | 11.05477 |
| 11389 | LOC103214 | 5.33106  | 3.236664 | 1.274468 | 2.539619 | 0.011097  | 0.025904  | 1.084173 | 0.547412 | 1.391463 | 6.696381 | 19.252   | 3.014938 |
| 9369  | SLC28A3   | 10.1857  | 3.236149 | 1.0737   | 3.014016 | 0.002578  | 0.007313  | 0.542086 | 0.547412 | 4.87012  | 22.32127 | 27.80844 | 5.024897 |
| 9198  | LOC103230 | 7.115069 | 3.236075 | 1.059221 | 3.055146 | 0.00225   | 0.006502  | 2.168345 | 1.094824 | 0.695731 | 17.85702 | 12.83466 | 8.039836 |
| 10752 | SLC18A1   | 11.80304 | 3.235926 | 1.208036 | 2.678666 | 0.007392  | 0.018276  | 0        | 0        | 6.957314 | 29.01765 | 27.80844 | 7.034856 |
| 6108  | CMKLR1    | 35.51688 | 3.234788 | 0.785893 | 4.116067 | 3.85E-05  | 0.000168  | 0.542086 | 2.189647 | 18.08902 | 80.35657 | 72.72976 | 39.1942  |
| 13747 | MYCT1     | 3.893005 | 3.234577 | 1.57086  | 2.059112 | 0.039483  | 0.076356  | 2.168345 | 0        | 0        | 4.464254 | 10.69555 | 6.029877 |
| 11812 | TRIML1    | 6.983487 | 3.23432  | 1.322119 | 2.446316 | 0.014432  | 0.032483  | 0        | 0        | 4.174388 | 17.85702 | 12.83466 | 7.034856 |
| 14732 | LOC119621 | 3.196194 | 3.2332   | 1.71672  | 1.883359 | 0.059652  | 0.107646  | 0.542086 | 0.547412 | 0.695731 | 6.696381 | 10.69555 | 0        |
| 6552  | PNMA6E    | 15.03764 | 3.232506 | 0.824929 | 3.918529 | 8.91E-05  | 0.000361  | 1.084173 | 2.737059 | 4.87012  | 24.5534  | 44.92132 | 12.05975 |
| 9407  | TMC2      | 9.628902 | 3.232107 | 1.075245 | 3.005926 | 0.002648  | 0.007483  | 0        | 2.737059 | 2.782925 | 31.24978 | 14.97377 | 6.029877 |
| 14044 | LOC119615 | 3.986114 | 3.231327 | 1.610724 | 2.006134 | 0.044842  | 0.084889  | 0        | 2.189647 | 0        | 11.16063 | 8.556443 | 2.009959 |
| 8776  | LOC119621 | 8.239457 | 3.231326 | 1.016153 | 3.179959 | 0.001473  | 0.004462  | 1.626259 | 1.642235 | 1.391463 | 8.928508 | 27.80844 | 8.039836 |
| 17489 | HELT      | 2.011571 | 3.231325 | 2.287169 | 1.412806 | 0.157713  | 0.23947   | 0        | 1.094824 | 0        | 6.696381 | 4.278221 | 0        |
| 12852 | LOC119621 | 3.978316 | 3.231178 | 1.450096 | 2.228251 | 0.025864  | 0.0535    | 1.084173 | 1.094824 | 0        | 13.39276 | 4.278221 | 4.019918 |
| 4663  | BHLHE41   | 22.89701 | 3.230948 | 0.657818 | 4.911612 | 9.03E-07  | 5.15E-06  | 1.084173 | 6.02153  | 6.261582 | 33.4819  | 51.33866 | 39.1942  |
| 16791 | TRIM61    | 2.157279 | 3.23048  | 2.11536  | 1.527154 | 0.126723  | 0.200624  | 0        | 0.547412 | 0.695731 | 0        | 10.69555 | 1.004979 |
| 16792 | LOC103231 | 2.157279 | 3.23048  | 2.11536  | 1.527154 | 0.126723  | 0.200624  | 0        | 0.547412 | 0.695731 | 0        | 10.69555 | 1.004979 |
| 9301  | SLC13A2   | 15.04077 | 3.229736 | 1.065231 | 3.031957 | 0.00243   | 0.006945  | 0        | 0.547412 | 8.348776 | 20.08914 | 49.19955 | 12.05975 |
| 12605 | LOC103221 | 4.315188 | 3.229721 | 1.415395 | 2.281852 | 0.022498  | 0.04745   | 0        | 0.547412 | 2.087194 | 8.928508 | 4.278221 | 10.04979 |
| 11209 | LOC119621 | 9.354509 | 3.229646 | 1.251169 | 2.581302 | 0.009843  | 0.023345  | 0        | 0        | 5.565851 | 17.85702 | 25.66933 | 7.034856 |
| 11682 | PRDM14    | 5.168962 | 3.228909 | 1.304387 | 4.975422 | 0.013308  | 0.030283  | 1.626259 | 0.547412 | 0.695731 | 11.16063 | 14.97377 | 2.009959 |
| 4616  | LOC119621 | 18.17383 | 3.228878 | 0.654026 | 4.936925 | 7.94E-07  | 4.57E-06  | 2.710432 | 4.379295 | 3.478657 | 33.4819  | 27.80844 | 37.18424 |
| 16591 | LOC103231 | 1.990046 | 3.228803 | 2.07151  | 1.558671 | 0.119074  | 0.190802  | 0        | 1.094824 | 0        | 6.696381 | 2.139111 | 2.009959 |
| 4611  | NTNG1     | 28.11488 | 3.228558 | 0.653781 | 4.938287 | 7.88E-07  | 4.54E-06  | 2.168345 | 7.663765 | 6.261582 | 51.33892 | 79.14709 | 22.10955 |
| 13899 | HAND1     | 4.633992 | 3.228077 | 1.590409 | 2.029715 | 0.042386  | 0.08107   | 0        | 0        | 2.782925 | 17.85702 | 2.139111 | 5.024897 |
| 10539 | LOC119621 | 9.131287 | 3.227054 | 1.179135 | 2.736798 | 0.006204  | 0.01565   | 0        | 0.547412 | 4.87012  | 13.39276 | 29.94755 | 6.029877 |
| 12659 | LOC119621 | 4.976745 | 3.225431 | 1.422084 | 2.268102 | 0.023323  | 0.04898   | 1.626259 | 1.094824 | 0        | 11.16063 | 14.97377 | 1.004979 |
| 9141  | NPAS4     | 15.0128  | 3.224859 | 1.050939 | 3.06855  | 0.002151  | 0.006256  | 0        | 0.547412 | 8.348776 | 40.17829 | 29.94755 | 11.05477 |
| 4970  | LOC103221 | 17.1435  | 3.224291 | 0.685504 | 4.703533 | 2.56E-06  | 1.37E-05  | 3.794605 | 3.831883 | 2.087194 | 37.94616 | 32.08666 | 23.11453 |
| 8567  | CALCR     | 10.8283  | 3.223282 | 0.995539 | 3.237724 | 0.001205  | 0.003739  | 1.084173 | 1.094824 | 4.174388 | 8.928508 | 40.6431  | 9.044815 |
| 7470  | CATSPER1  | 10.53086 | 3.222626 | 0.90205  | 3.572556 | 0.000354  | 0.001258  | 1.084173 | 2.189647 | 2.782925 | 24.5534  | 23.53022 | 9.044815 |
| 7598  | MYO7A     | 22.86688 | 3.221538 | 0.913423 | 3.526887 | 0.00042   | 0.001471  | 0        | 1.094824 | 12.52316 | 37.94616 | 53.47777 | 32.15934 |
| 12499 | LOC103231 | 5.698938 | 3.22128  | 1.399333 | 2.302011 | 0.021335  | 0.045378  | 0        | 0        | 3.478657 | 6.696381 | 14.97377 | 9.044815 |
| 90    | BMF       | 988.3651 | 3.221131 | 0.129091 | 24.95233 | 2.01E-137 | 5.95E-135 | 183.7673 | 190.4993 | 201.7621 | 1662.935 | 1713.428 | 1977.8   |
| 9075  | DDX43     | 11.20204 | 3.220314 | 1.042204 | 3.089907 | 0.002002  | 0.005865  | 0        | 1.094824 | 5.565851 | 31.24978 | 19.252   | 10.04979 |
| 13564 | LOC103241 | 4.624511 | 3.218545 | 1.53528  | 2.09639  | 0.036048  | 0.070652  | 0        | 0        | 2.782925 | 13.39276 | 8.556443 | 3.014938 |
| 16521 | LOC119611 | 1.974543 | 3.21753  | 2.047633 | 1.571341 | 0.116103  | 0.18683   | 0        | 1.094824 | 0        | 4.464254 | 4.278221 | 2.009959 |
| 8248  | LOC103234 | 8.017752 | 3.217332 | 0.965985 | 3.330624 | 0.000867  | 0.002793  | 1.084173 | 2.189647 | 1.391463 | 13.39276 | 14.97377 | 15.07469 |
| 9695  | LOC103221 | 6.09574  | 3.217309 | 1.097222 | 2.932232 | 0.003365  | 0.009228  | 1.084173 | 1.094824 | 1.391463 | 13.39276 | 8.556443 | 11.05477 |
| 9852  | LOC103241 | 6.315504 | 3.216504 | 1.112219 | 2.89197  | 0.003828  | 0.010331  | 1.084173 | 0.547412 | 2.087194 | 11.16063 | 14.97377 | 8.039836 |
| 14184 | LOC119611 | 4.661539 | 3.215983 | 1.624539 | 1.979628 | 0.047745  | 0.089489  | 0        | 0        | 2.782925 | 15.62489 | 8.556443 | 1.004979 |
| 138   | CDH16     | 4408.992 | 3.215673 | 0.141071 | 22.79476 | 5.17E-115 | 9.96E-113 | 925.8835 | 699.5923 | 947.5861 | 7549.053 | 7106.126 | 9225.712 |
| 11581 | LOC103241 | 5.398041 | 3.215631 | 1.286822 | 2.498895 | 0.012458  | 0.028599  | 0        | 1.094824 | 2.087194 | 15.62489 | 8.556443 | 5.024897 |
| 14996 | FAIM2     | 28.21621 | 3.215494 | 1.752324 | 1.834988 | 0.066508  | 0.117895  | 0        | 0.547412 | 16.00182 | 40.17829 | 83.42532 | 29.1444  |
| 9817  | LOC103241 | 15.07843 | 3.213968 | 1.107854 | 2.901075 | 0.003719  | 0.010071  | 0        | 0        | 9.044508 | 31.24978 | 32.08666 | 18.08963 |
| 4256  | LRR12     | 21.57643 | 3.213829 | 0.619836 | 5.184966 | 2.16E-07  | 1.35E-06  | 2.168345 | 4.379295 | 6.261582 | 37.94616 | 38.50399 | 40.19918 |
| 9875  | PLA2G2F   | 8.923309 | 3.213701 | 1.112992 | 2.887442 | 0.003884  | 0.010456  | 0.542086 | 0        | 4.87012  | 20.08914 | 14.97377 | 13.06473 |
| 14252 | LOC119621 | 2.944537 | 3.212724 | 1.632605 | 1.967851 | 0.049085  | 0.091561  | 1.084173 | 0.547412 | 0        | 4.464254 | 8.556443 | 3.014938 |
| 11385 | FBXO40    | 5.330008 | 3.212248 | 1.264633 | 2.540063 | 0.011083  | 0.02588   | 0        | 1.094824 | 2.087194 | 8.928508 | 12.83466 | 7.034856 |
| 7125  | RP111     | 25.87148 | 3.212203 | 0.870888 | 3.688424 | 0.000226  | 0.000842  | 0        | 2.189647 | 13.2189  | 37.94616 | 72.72976 | 29.1444  |
| 11512 | LOC119611 | 5.382538 | 3.212092 | 1.278768 | 2.511864 | 0.01201   | 0.027734  | 0        | 1.094824 | 2.087194 | 13.39276 | 10.69555 | 5.024897 |
| 746   | GALM      | 127.3752 | 3.211379 | 0.256919 | 12.49958 | 7.50E-36  | 2.67E-34  | 24.39389 | 24.63353 | 25.74206 | 216.5163 | 226.7457 | 246.22   |
| 16000 | FNDC9     | 1.973655 | 3.211342 | 1.928274 | 1.665397 | 0.095834  | 0.159234  | 0.542086 | 0.547412 | 0        | 4.464254 | 4.278221 | 2.009959 |
| 13420 | NANOG     | 4.556478 | 3.211317 | 1.512743 | 2.122843 | 0.033767  | 0.066892  | 0        | 0        | 2.782925 | 6.696381 | 12.83466 | 5.024897 |
| 12881 | CCDC63    | 5.704961 | 3.210872 | 1.44498  | 2.222087 | 0.026277  | 0.054233  | 0        | 0        | 3.478657 | 4.464254 | 19.252   | 7.034856 |
| 16683 | TPRX1     | 1.95904  | 3.210166 | 2.077874 | 1.544928 | 0.122364  | 0.194991  | 0        | 1.094824 | 0        | 2.232127 | 6.417332 | 2.009959 |
| 14269 | LOC119611 | 2.945424 | 3.210153 | 1.632481 | 1.966425 | 0.049249  | 0.09176   | 0.542086 | 1.094824 | 0        | 4.464254 | 8.556443 | 3.014938 |
| 15251 | SRRM4     | 31.69181 | 3.209243 | 1.79444  | 1.788437 | 0.073705  | 0.128481  | 0        | 0.547412 | 18.08902 | 73.66019 | 72.72976 | 25.12449 |
| 12453 | TP53AIP1  | 4.142722 | 3.20692  | 1.388273 | 2.310007 | 0.020888  | 0.044591  | 1.084173 | 0        | 1.391463 | 8.928508 | 6.417332 | 7.034856 |
| 14324 | C         |          |          |          |          |           |           |          |          |          |          |          |          |



|       |           |          |          |          |          |           |           |          |          |          |          |          |          |
|-------|-----------|----------|----------|----------|----------|-----------|-----------|----------|----------|----------|----------|----------|----------|
| 12670 | SLC22A8   | 4.379764 | 3.205541 | 1.414298 | 2.266524 | 0.023419  | 0.04914   | 0        | 0.547412 | 2.087194 | 8.928508 | 10.69555 | 4.019918 |
| 8456  | TPBGL     | 12.41888 | 3.205481 | 0.981241 | 3.266761 | 0.001088  | 0.00342   | 0.542086 | 3.831883 | 2.782925 | 31.24978 | 32.08666 | 4.019918 |
| 16890 | EN2       | 15.30704 | 3.204968 | 2.124653 | 1.508467 | 0.131435  | 0.206892  | 0        | 0        | 9.044508 | 24.5534  | 49.19955 | 9.044815 |
| 13728 | LCN9      | 4.578003 | 3.204253 | 1.551571 | 2.065167 | 0.038907  | 0.075347  | 0        | 0        | 2.782925 | 6.696381 | 14.97377 | 3.014938 |
| 5950  | LOC103215 | 19.29695 | 3.203369 | 0.765369 | 4.185389 | 2.85E-05  | 0.000127  | 2.710432 | 1.094824 | 7.653045 | 40.17829 | 47.06043 | 17.08465 |
| 12000 | LOC119621 | 4.128107 | 3.202959 | 1.330931 | 2.406554 | 0.016104  | 0.035679  | 0.542086 | 0.547412 | 1.391463 | 6.696381 | 8.556443 | 7.034856 |
| 12649 | TNP1      | 5.571297 | 3.202875 | 1.410304 | 2.271053 | 0.023144  | 0.048642  | 0        | 0.547412 | 2.782925 | 6.696381 | 21.39111 | 2.009959 |
| 8350  | ZNF470    | 8.886863 | 3.202636 | 0.971483 | 3.296646 | 0.000978  | 0.003115  | 1.084173 | 3.284471 | 0.695731 | 20.08914 | 17.11289 | 11.05477 |
| 15191 | LOC119621 | 3.460526 | 3.202556 | 1.781502 | 1.797671 | 0.072229  | 0.126405  | 0        | 0        | 2.087194 | 13.39276 | 4.278221 | 1.004979 |
| 14243 | LOC119621 | 4.615031 | 3.20208  | 1.626475 | 1.968723 | 0.048985  | 0.091426  | 0        | 0        | 2.782925 | 8.928508 | 14.97377 | 1.004979 |
| 8101  | ROS1      | 9.10574  | 3.201575 | 0.947156 | 3.380199 | 0.000724  | 0.002377  | 1.626259 | 2.189647 | 1.391463 | 17.85702 | 23.53022 | 8.039836 |
| 51    | ELF3      | 2152.494 | 3.201027 | 0.10721  | 29.85756 | 7.00E-196 | 3.65E-193 | 430.9587 | 410.0114 | 427.1791 | 3770.062 | 3640.766 | 4235.988 |
| 8503  | TDRD1     | 19.20051 | 3.200755 | 0.983095 | 3.255793 | 0.001131  | 0.003535  | 0        | 1.094824 | 10.43597 | 24.5534  | 62.03421 | 17.08465 |
| 12053 | LOC103221 | 5.318752 | 3.200385 | 1.335199 | 2.396935 | 0.016533  | 0.036466  | 1.084173 | 0        | 2.087194 | 4.464254 | 19.252   | 5.024897 |
| 8831  | CUNH9orf1 | 8.544899 | 3.200041 | 1.011838 | 3.162603 | 0.001564  | 0.004707  | 0.542086 | 1.094824 | 3.478657 | 17.85702 | 19.252   | 9.044815 |
| 12885 | PDE11A    | 5.555795 | 3.198576 | 1.439861 | 2.221448 | 0.026321  | 0.054306  | 0        | 0.547412 | 2.782925 | 4.464254 | 23.53022 | 2.009959 |
| 10082 | ABCA6     | 7.58326  | 3.196754 | 1.124997 | 2.841566 | 0.004489  | 0.011838  | 3.252518 | 1.094824 | 0        | 6.696381 | 21.39111 | 13.06473 |
| 14628 | LOC119621 | 3.392493 | 3.196197 | 1.680863 | 1.901522 | 0.057234  | 0.104014  | 0        | 0        | 2.087194 | 6.696381 | 8.556443 | 3.014938 |
| 538   | MAF       | 244.21   | 3.195569 | 0.224885 | 14.20981 | 7.96E-46  | 3.94E-44  | 42.28274 | 41.05589 | 61.92009 | 484.3716 | 374.3444 | 461.2856 |
| 11560 | LOC103221 | 7.964473 | 3.194569 | 1.276473 | 2.502653 | 0.012327  | 0.028348  | 0        | 0        | 4.87012  | 15.62489 | 19.252   | 8.039836 |
| 9346  | WNT1      | 6.895042 | 3.194016 | 1.0577   | 3.019776 | 0.00253   | 0.007195  | 2.168345 | 1.094824 | 0.695731 | 13.39276 | 14.97377 | 9.044815 |
| 5244  | RFX4      | 29.17369 | 3.193323 | 0.700888 | 4.55611  | 5.21E-06  | 2.64E-05  | 3.252518 | 1.094824 | 13.2189  | 60.26743 | 62.03421 | 35.17428 |
| 11157 | EYA2      | 6.602249 | 3.192922 | 1.232707 | 2.590171 | 0.009593  | 0.022858  | 0        | 0.547412 | 3.478657 | 17.85702 | 10.69555 | 7.034856 |
| 10200 | RHBDL2    | 6.335089 | 3.19273  | 1.133817 | 2.815912 | 0.004864  | 0.012676  | 0.542086 | 0.547412 | 2.782925 | 13.39276 | 10.69555 | 10.04979 |
| 8748  | KCNK2     | 12.00108 | 3.190226 | 1.000227 | 3.189504 | 0.001425  | 0.004331  | 1.084173 | 0.547412 | 5.565851 | 24.5534  | 34.22577 | 6.029877 |
| 1373  | SPOCK3    | 75.34146 | 3.189862 | 0.33068  | 9.646358 | 5.09E-22  | 9.86E-21  | 14.09425 | 15.87494 | 14.61036 | 154.0168 | 119.7902 | 133.6623 |
| 7029  | PLCB2     | 22.65339 | 3.189587 | 0.856835 | 3.722522 | 0.000197  | 0.000746  | 0        | 3.831883 | 9.740239 | 37.94616 | 66.31243 | 18.08963 |
| 8884  | TVP23A    | 8.247621 | 3.189074 | 1.012999 | 3.14815  | 0.001643  | 0.004917  | 0.542086 | 1.642235 | 2.782925 | 8.928508 | 23.53022 | 12.05975 |
| 12228 | LOC119621 | 3.913477 | 3.188483 | 1.350479 | 2.361001 | 0.018226  | 0.039625  | 1.084173 | 0.547412 | 0.695731 | 6.696381 | 6.417332 | 8.039836 |
| 547   | FOXJ1     | 240.8162 | 3.188239 | 0.22546  | 14.14106 | 2.12E-45  | 1.03E-43  | 43.909   | 41.05589 | 58.44144 | 515.6213 | 365.7879 | 420.0814 |
| 10188 | LOC119621 | 6.135962 | 3.188192 | 1.131371 | 2.817991 | 0.004833  | 0.01261   | 1.084173 | 0.547412 | 2.087194 | 15.62489 | 6.417332 | 11.05477 |
| 8177  | LOC119621 | 10.66834 | 3.187444 | 0.950495 | 3.353457 | 0.000798  | 0.002595  | 0.542086 | 1.094824 | 4.87012  | 15.62489 | 27.80844 | 14.06971 |
| 10270 | LOC119621 | 6.356614 | 3.185903 | 1.139499 | 2.795881 | 0.005176  | 0.013398  | 0.542086 | 0.547412 | 2.782925 | 13.39276 | 12.83466 | 8.039836 |
| 759   | MMPI3     | 146.6927 | 3.185232 | 0.256295 | 12.42799 | 1.84E-35  | 6.45E-34  | 26.56223 | 35.58177 | 25.04633 | 258.9267 | 239.5804 | 294.459  |
| 9906  | LRRRC30   | 11.03109 | 3.184012 | 1.104103 | 2.883799 | 0.003929  | 0.010545  | 0        | 1.094824 | 5.565851 | 24.5534  | 29.94755 | 5.024897 |
| 17225 | LOC119621 | 19.78904 | 3.183855 | 2.17557  | 1.463458 | 0.143342  | 0.221234  | 0        | 0        | 11.82743 | 44.64254 | 49.19955 | 13.06473 |
| 7947  | GABRA4    | 20.03464 | 3.182912 | 0.929388 | 3.424741 | 0.000615  | 0.002059  | 1.084173 | 0        | 11.1317  | 37.94616 | 44.92132 | 25.12449 |
| 8304  | MAGEA3    | 13.60172 | 3.181691 | 0.960662 | 3.311979 | 0.000926  | 0.002966  | 0.542086 | 2.737059 | 4.87012  | 8.928508 | 53.47777 | 11.05477 |
| 12762 | LOC119621 | 5.614978 | 3.179933 | 1.414636 | 2.247881 | 0.024584  | 0.051211  | 0        | 0        | 3.478657 | 15.62489 | 8.556443 | 6.029877 |
| 12954 | LOC103231 | 4.172045 | 3.178827 | 1.436811 | 2.212419 | 0.026938  | 0.055283  | 0        | 1.094824 | 1.391463 | 6.696381 | 12.83466 | 3.014938 |
| 11382 | AQP9      | 4.891269 | 3.17626  | 1.249653 | 2.541713 | 0.011031  | 0.025765  | 1.084173 | 1.094824 | 0.695731 | 4.464254 | 14.97377 | 7.034856 |
| 4888  | CD209     | 26.10582 | 3.17616  | 0.668876 | 4.748505 | 2.05E-06  | 1.11E-05  | 4.336691 | 1.642235 | 9.740239 | 58.0353  | 57.75599 | 25.12449 |
| 7650  | LOC103231 | 12.21416 | 3.173359 | 0.904104 | 3.509951 | 0.000448  | 0.001557  | 3.252518 | 0        | 4.174388 | 20.08914 | 25.66933 | 20.09959 |
| 12936 | LOC103221 | 3.936778 | 3.173245 | 1.432339 | 2.215429 | 0.026731  | 0.054935  | 0        | 1.642235 | 0.695731 | 6.696381 | 8.556443 | 6.029877 |
| 490   | LOC103241 | 196.874  | 3.17264  | 0.215268 | 14.73806 | 3.67E-49  | 1.99E-47  | 44.45108 | 34.48694 | 38.96096 | 348.2118 | 359.3706 | 355.7627 |
| 12947 | GLRA1     | 5.621    | 3.172106 | 1.432785 | 2.213945 | 0.026833  | 0.055097  | 0        | 0        | 3.478657 | 13.39276 | 12.83466 | 4.019918 |
| 9799  | CD207     | 8.568731 | 3.172035 | 1.091924 | 2.904996 | 0.003673  | 0.009964  | 1.084173 | 0        | 4.174388 | 17.85702 | 19.252   | 9.044815 |
| 5742  | HVCN1     | 15.29203 | 3.16966  | 0.736236 | 4.305226 | 1.67E-05  | 7.72E-05  | 2.168345 | 2.189647 | 4.87012  | 33.4819  | 29.94755 | 19.09461 |
| 10404 | LOC119621 | 7.158579 | 3.169439 | 1.146008 | 2.765633 | 0.005681  | 0.014517  | 0        | 2.189647 | 2.087194 | 13.39276 | 19.252   | 6.029877 |
| 14536 | CR2       | 4.125537 | 3.167272 | 1.650272 | 1.919243 | 0.054954  | 0.100505  | 0        | 1.094824 | 1.391463 | 0        | 19.252   | 3.014938 |
| 14159 | PDE6C     | 3.775567 | 3.16631  | 1.596605 | 1.983152 | 0.04735   | 0.088905  | 0        | 2.189647 | 0        | 11.16063 | 4.278221 | 5.024897 |
| 12148 | LOC119621 | 5.302197 | 3.166171 | 1.332635 | 2.375873 | 0.017507  | 0.038314  | 0        | 0.547412 | 2.782925 | 4.464254 | 14.97377 | 9.044815 |
| 11184 | LOC103231 | 7.33006  | 3.166045 | 1.22476  | 2.585032 | 0.009737  | 0.023145  | 1.084173 | 0.547412 | 2.782925 | 4.464254 | 32.08666 | 3.014938 |
| 4120  | ITGAL     | 27.61648 | 3.165889 | 0.600023 | 5.276277 | 1.32E-07  | 8.51E-07  | 3.794605 | 3.831883 | 9.044508 | 53.57105 | 66.31243 | 29.1444  |
| 6671  | LOC103241 | 15.91709 | 3.165288 | 0.81827  | 3.868267 | 0.00011   | 0.000437  | 5.420864 | 0.547412 | 3.478657 | 33.4819  | 38.50399 | 14.06971 |
| 5137  | LOC103211 | 20.32973 | 3.164654 | 0.686783 | 4.60794  | 4.07E-06  | 2.10E-05  | 1.084173 | 4.379295 | 6.957314 | 33.4819  | 44.92132 | 31.15436 |
| 6908  | SCGN      | 12.16235 | 3.164031 | 0.838287 | 3.774399 | 0.00016   | 0.000617  | 1.084173 | 1.642235 | 4.87012  | 17.85702 | 21.39111 | 26.12947 |
| 14650 | CT45A10   | 3.01754  | 3.163997 | 1.667833 | 1.89707  | 0.057819  | 0.104922  | 0        | 1.094824 | 0.695731 | 11.16063 | 2.139111 | 3.014938 |
| 5323  | KRT76     | 19.61298 | 3.162999 | 0.701704 | 4.507594 | 6.56E-06  | 3.27E-05  | 2.168345 | 2.189647 | 7.653045 | 33.4819  | 47.06043 | 25.12449 |
| 14124 | LOC103231 | 3.016652 | 3.16288  | 1.58956  | 1.989784 | 0.046615  | 0.087741  | 0.542086 | 0.547412 | 0.695731 | 11.16063 | 2.139111 | 3.014938 |
| 6866  | CLEC17A   | 12.17183 | 3.161113 | 0.834147 | 3.789637 | 0.000151  | 0.000584  | 2.168345 | 1.642235 | 3.478657 | 29.01765 | 25.66933 | 11.05477 |
| 9736  | SLC32A1   | 13.30327 | 3.160916 | 1.082558 | 2.919857 | 0.003502  | 0.009562  | 0        | 0.547412 | 7.653045 | 40.17829 | 21.39111 | 10.04979 |
| 10309 | LOC119621 | 7.384996 | 3.159988 | 1.133879 | 2.786883 | 0.005322  | 0.013724  | 0        | 1.094824 | 3.478657 | 17.85702 | 12.83466 | 9.044815 |
| 13976 | LOC119621 | 4.450992 | 3.159984 | 1.567289 | 2.01621  | 0.043778  | 0.083274  | 0        | 0        | 2.782925 | 15.62489 | 4.278221 | 4.019918 |
| 320   | RASD2     | 309.234  | 3.159653 | 0.186773 | 16.91708 | 3.37E-64  | 2.80E-62  | 56.91907 | 64.04718 | 66.79021 | 535.7105 | 504.8301 | 627.1072 |
| 4133  | LOC103221 | 26.46256 | 3.159652 | 0.599568 | 5.269884 | 1.37E-07  | 8.78E-07  | 4.336691 | 7.116354 | 4.174388 | 60.26743 | 57.75599 | 25.12449 |
| 14750 | LOC103221 | 3.169271 | 3.159397 | 1.67943  | 1.881232 | 0.05994   | 0.108035  | 0        | 0.547412 | 1.391463 | 2.232127 | 12.83466 | 2.009959 |
| 9274  | CD40LG    | 13.17669 | 3.157737 | 1.039092 | 3.03894  | 0.002374  | 0.006806  | 0        | 0.547412 | 7.653045 | 31.24978 | 23.53022 | 16.07967 |
| 16433 | FAM3D     | 2.175977 | 3.156417 | 1.993218 | 1.583578 | 0.11329   | 0.183278  | 0        | 0        | 1.391463 | 2.232127 | 6.417332 | 3.014938 |
| 16574 | LOC119621 | 2.228507 | 3.156331 | 2.020789 | 1.56193  | 0.118305  | 0.189751  | 0        | 0        | 1.391463 | 6.696381 | 4.278221 | 1.004979 |
| 16576 | TRIM69    | 2.228507 | 3.156331 | 2.020789 | 1.56193  | 0.118305  | 0.189751  | 0        | 0        | 1.391463 | 6.696381 | 4.278221 | 1.004979 |
| 15647 | LOC103241 | 3.15288  | 3.154915 | 1.828658 | 1.7252   |           |           |          |          |          |          |          |          |



|       |           |          |          |          |          |           |           |          |          |          |           |          |          |
|-------|-----------|----------|----------|----------|----------|-----------|-----------|----------|----------|----------|-----------|----------|----------|
| 4410  | PCDH15    | 26.22194 | 3.152307 | 0.621429 | 5.072672 | 3.92E-07  | 2.36E-06  | 4.336691 | 3.831883 | 7.653045 | 69.19594  | 49.19955 | 23.11453 |
| 5577  | CPNE5     | 16.96452 | 3.150257 | 0.718768 | 4.382855 | 1.17E-05  | 5.58E-05  | 2.710432 | 3.284471 | 4.174388 | 40.17829  | 36.36488 | 15.07469 |
| 11167 | GRM5      | 7.573755 | 3.150099 | 1.217354 | 2.587662 | 0.009663  | 0.023004  | 0        | 0.547412 | 4.174388 | 11.16063  | 23.53022 | 6.029877 |
| 9781  | LOC103216 | 12.05486 | 3.149935 | 1.082801 | 2.909062 | 0.003625  | 0.009852  | 0.542086 | 0        | 6.957314 | 31.24978  | 23.53022 | 10.04979 |
| 14385 | ZBBX      | 2.986534 | 3.149461 | 1.616997 | 1.947723 | 0.051448  | 0.095082  | 0        | 1.094824 | 0.695731 | 6.696381  | 6.417332 | 3.014938 |
| 584   | LOC103235 | 229.9178 | 3.149163 | 0.228593 | 13.77631 | 3.54E-43  | 1.61E-41  | 40.11439 | 38.86624 | 61.92009 | 435.2648  | 372.2053 | 431.1362 |
| 14426 | LOC119624 | 3.038178 | 3.148896 | 1.623857 | 1.939186 | 0.052479  | 0.096711  | 0.542086 | 0.547412 | 0.695731 | 11.16063  | 4.278221 | 1.004979 |
| 8597  | KRT5      | 7.949031 | 3.148872 | 0.974803 | 3.230266 | 0.001237  | 0.003824  | 1.084173 | 1.642235 | 2.087194 | 17.85702  | 14.97377 | 10.04979 |
| 9835  | PGM5      | 8.11804  | 3.148741 | 1.086501 | 2.898056 | 0.003755  | 0.01015   | 0        | 2.189647 | 2.782925 | 11.16063  | 23.53022 | 9.044815 |
| 13236 | LOC119618 | 3.743674 | 3.147901 | 1.457089 | 2.160405 | 0.030741  | 0.061745  | 0.542086 | 1.642235 | 0        | 6.696381  | 8.556443 | 5.024897 |
| 12569 | ASCL5     | 7.824525 | 3.147813 | 1.374752 | 2.289732 | 0.022037  | 0.046611  | 0        | 0        | 4.87012  | 13.39276  | 25.66933 | 3.014938 |
| 618   | SH3RF3    | 159.1603 | 3.147633 | 0.234751 | 13.40841 | 5.40E-41  | 2.32E-39  | 29.81475 | 31.74989 | 35.4823  | 310.2657  | 265.2497 | 282.3992 |
| 16617 | LOC119618 | 2.213005 | 3.147322 | 2.023424 | 1.555443 | 0.11984   | 0.191706  | 0        | 0        | 1.391463 | 4.464254  | 6.417332 | 1.004979 |
| 16618 | CNMD      | 2.213005 | 3.147322 | 2.023424 | 1.555443 | 0.11984   | 0.191706  | 0        | 0        | 1.391463 | 4.464254  | 6.417332 | 1.004979 |
| 16619 | LOC119620 | 2.213005 | 3.147322 | 2.023424 | 1.555443 | 0.11984   | 0.191706  | 0        | 0        | 1.391463 | 4.464254  | 6.417332 | 1.004979 |
| 9118  | LOC119627 | 12.91298 | 3.146724 | 1.022082 | 3.078739 | 0.002079  | 0.006061  | 0        | 1.094824 | 6.957314 | 17.85702  | 38.50399 | 13.06473 |
| 12084 | LOC119627 | 7.691915 | 3.145818 | 1.316194 | 2.390088 | 0.016844  | 0.037057  | 0        | 0        | 4.87012  | 6.696381  | 23.53022 | 11.05477 |
| 4245  | LOC103226 | 47.83243 | 3.145496 | 0.605985 | 5.190719 | 2.09E-07  | 1.31E-06  | 2.710432 | 6.568942 | 20.17621 | 73.66019  | 132.6249 | 51.25395 |
| 10311 | BHLHA9    | 5.719636 | 3.145447 | 1.129012 | 2.786016 | 0.005336  | 0.013758  | 1.626259 | 1.094824 | 0.695731 | 11.16063  | 10.69555 | 9.044815 |
| 14843 | LOC119620 | 3.023562 | 3.145434 | 1.688345 | 1.863028 | 0.062458  | 0.11186   | 0        | 1.094824 | 0.695731 | 8.928508  | 6.417332 | 1.004979 |
| 14844 | LOC103240 | 3.023562 | 3.145434 | 1.688345 | 1.863028 | 0.062458  | 0.11186   | 0        | 1.094824 | 0.695731 | 8.928508  | 6.417332 | 1.004979 |
| 10374 | PRSS55    | 5.940288 | 3.145395 | 1.135333 | 2.77046  | 0.005598  | 0.014345  | 1.084173 | 1.094824 | 1.391463 | 8.928508  | 17.11289 | 6.029877 |
| 8730  | PIK3R6    | 14.84661 | 3.144327 | 0.984546 | 3.193683 | 0.001405  | 0.004278  | 0        | 2.189647 | 6.957314 | 31.24978  | 40.6431  | 8.039836 |
| 308   | ESR1      | 293.2712 | 3.144199 | 0.181704 | 17.30399 | 4.39E-67  | 3.79E-65  | 65.05036 | 57.47824 | 56.35424 | 497.7643  | 526.2212 | 556.7586 |
| 12230 | CA10      | 5.168534 | 3.143364 | 1.331714 | 2.36039  | 0.018256  | 0.039683  | 0        | 1.094824 | 2.087194 | 6.696381  | 17.11289 | 4.019918 |
| 11168 | LOC103228 | 5.636988 | 3.141676 | 1.21436  | 2.587104 | 0.009679  | 0.02304   | 1.084173 | 1.642235 | 0.695731 | 2.232127  | 17.11289 | 11.05477 |
| 2155  | APOL2     | 61.31537 | 3.140225 | 0.409196 | 7.67414  | 1.67E-14  | 2.05E-13  | 12.46799 | 6.568942 | 18.78475 | 116.0706  | 115.512  | 98.48799 |
| 14882 | MSR1      | 3.00806  | 3.139014 | 1.689502 | 1.857952 | 0.063176  | 0.112845  | 0        | 1.094824 | 0.695731 | 6.696381  | 8.556443 | 1.004979 |
| 14780 | SERPINB13 | 2.955529 | 3.138927 | 1.672619 | 1.876654 | 0.060566  | 0.10894   | 0        | 1.094824 | 0.695731 | 2.232127  | 10.69555 | 3.014938 |
| 13011 | DEFB125   | 4.17524  | 3.138649 | 1.425521 | 2.201756 | 0.027683  | 0.056563  | 0        | 0.547412 | 2.087194 | 6.696381  | 10.69555 | 5.024897 |
| 11768 | ASB14     | 5.836743 | 3.138381 | 1.278327 | 2.45507  | 0.014086  | 0.031821  | 1.626259 | 1.094824 | 0.695731 | 15.62489  | 14.97377 | 1.004979 |
| 290   | S100A4    | 4358.28  | 3.138374 | 0.178053 | 17.62603 | 1.56E-69  | 1.43E-67  | 1045.685 | 582.9936 | 1039.423 | 7595.928  | 7655.877 | 8229.777 |
| 9105  | LOC103246 | 10.63063 | 3.137121 | 1.017911 | 3.081921 | 0.002057  | 0.006005  | 0.542086 | 0.547412 | 5.565851 | 24.5534   | 23.53022 | 9.044815 |
| 16824 | LOC103237 | 2.197502 | 3.137056 | 2.062959 | 1.520658 | 0.128346  | 0.20281   | 0        | 0        | 1.391463 | 2.232127  | 8.556443 | 1.004979 |
| 14012 | LOC119625 | 3.734194 | 3.136882 | 1.560003 | 2.010818 | 0.044345  | 0.084135  | 0.542086 | 1.642235 | 0        | 2.232127  | 14.97377 | 3.014938 |
| 11375 | TRIM10    | 4.968519 | 3.135361 | 1.232963 | 2.542949 | 0.010992  | 0.02569   | 1.084173 | 0.547412 | 1.391463 | 8.928508  | 12.83466 | 5.024897 |
| 5413  | ARHGAP36  | 42.38651 | 3.134653 | 0.703566 | 4.455377 | 8.37E-06  | 4.11E-05  | 2.168345 | 3.284471 | 20.87194 | 64.73168  | 124.0684 | 39.1942  |
| 14995 | LOC119625 | 2.992557 | 3.133733 | 1.707448 | 1.835331 | 0.066457  | 0.117823  | 0        | 1.094824 | 0.695731 | 4.464254  | 10.69555 | 1.004979 |
| 9267  | NEU4      | 10.27207 | 3.131889 | 1.030036 | 3.040561 | 0.002361  | 0.006774  | 0        | 2.189647 | 4.174388 | 31.24978  | 14.97377 | 9.044815 |
| 13144 | ADAMTS4   | 72.61871 | 3.131854 | 1.435506 | 2.181706 | 0.029131  | 0.058921  | 0.542086 | 3.831883 | 40.35242 | 1504.0168 | 179.6853 | 57.28383 |
| 81    | ALOX5     | 909.523  | 3.130715 | 0.121353 | 25.79833 | 9.26E-147 | 3.04E-144 | 175.636  | 192.689  | 191.3261 | 1676.327  | 1567.968 | 1653.191 |
| 8678  | CASQ1     | 10.36949 | 3.129816 | 0.975416 | 3.208699 | 0.001333  | 0.004085  | 1.084173 | 0.547412 | 4.87012  | 17.85702  | 27.80844 | 10.04979 |
| 9510  | LOC103247 | 15.11608 | 3.128818 | 1.04901  | 2.98264  | 0.002858  | 0.007989  | 0        | 1.094824 | 8.348776 | 35.71403  | 38.50399 | 7.034856 |
| 13333 | C8A       | 4.196765 | 3.128684 | 1.460646 | 2.141986 | 0.032195  | 0.064194  | 0        | 0.547412 | 2.087194 | 6.696381  | 12.83466 | 3.014938 |
| 13125 | LOC103238 | 5.425956 | 3.128495 | 1.433098 | 2.183303 | 0.029034  | 0.058799  | 0        | 0        | 3.478657 | 15.62489  | 6.417332 | 7.034856 |
| 8936  | LOC103226 | 20.81219 | 3.127997 | 0.997699 | 3.135212 | 0.001717  | 0.005109  | 0        | 0.547412 | 12.52316 | 44.64254  | 47.06043 | 20.09959 |
| 13261 | LOC103247 | 4.029531 | 3.127801 | 1.451105 | 2.155461 | 0.031126  | 0.062399  | 0        | 1.094824 | 1.391463 | 13.39276  | 4.278221 | 4.019918 |
| 11943 | LOC119625 | 8.799488 | 3.127036 | 1.294317 | 2.415975 | 0.015693  | 0.034933  | 0        | 0        | 5.565851 | 13.39276  | 27.80844 | 6.029877 |
| 11574 | DAPP1     | 4.718637 | 3.126133 | 1.2501   | 2.500706 | 0.012395  | 0.02847   | 0.542086 | 1.642235 | 0.695731 | 6.696381  | 10.69555 | 8.039836 |
| 13853 | SLCO1A2   | 4.233793 | 3.125634 | 1.533078 | 2.038796 | 0.04147   | 0.079585  | 0        | 0.547412 | 2.087194 | 8.928508  | 12.83466 | 1.004979 |
| 7942  | LOC103215 | 9.576701 | 3.125159 | 0.912295 | 3.425601 | 0.000613  | 0.002053  | 2.710432 | 1.642235 | 1.391463 | 24.5534   | 17.11289 | 10.04979 |
| 8202  | LOC103237 | 16.96723 | 3.124841 | 0.933961 | 3.345794 | 0.00082   | 0.002659  | 0        | 1.642235 | 9.044508 | 31.24978  | 42.78221 | 17.08465 |
| 8615  | PODNL1    | 8.664632 | 3.123702 | 0.968595 | 3.224982 | 0.00126   | 0.003888  | 0.542086 | 2.737059 | 2.087194 | 11.16063  | 21.39111 | 14.06971 |
| 8916  | LOC119625 | 10.1205  | 3.123105 | 0.994663 | 3.139864 | 0.00169   | 0.00504   | 0        | 2.189647 | 4.174388 | 15.62489  | 25.66933 | 13.06473 |
| 7406  | TMEM119   | 10.80332 | 3.121554 | 0.867444 | 3.598564 | 0.00032   | 0.001149  | 2.168345 | 1.642235 | 2.782925 | 26.78552  | 21.39111 | 10.04979 |
| 97    | BCHE      | 847.4551 | 3.121246 | 0.127801 | 24.42277 | 9.80E-132 | 2.69E-129 | 182.6831 | 181.1933 | 160.0182 | 1446.418  | 1514.49  | 1599.927 |
| 17732 | NTSR1     | 2.181999 | 3.1211   | 2.263029 | 1.37917  | 0.167842  | 0.251641  | 0        | 0        | 1.391463 | 0         | 10.69555 | 1.004979 |
| 14779 | LOC103235 | 4.072582 | 3.120586 | 1.662327 | 1.87724  | 0.060485  | 0.108803  | 0        | 1.094824 | 1.391463 | 13.39276  | 8.556443 | 0        |
| 9247  | LOC103245 | 9.142706 | 3.119801 | 1.025171 | 3.043202 | 0.002341  | 0.00673   | 0        | 1.642235 | 4.174388 | 17.85702  | 17.11289 | 14.06971 |
| 2888  | SERPINA4  | 34.07027 | 3.119288 | 0.475227 | 6.563789 | 5.25E-11  | 4.83E-10  | 5.96295  | 8.211177 | 6.957314 | 55.80317  | 64.17332 | 63.31371 |
| 15021 | LOC119624 | 3.218974 | 3.118736 | 1.705041 | 1.829127 | 0.067381  | 0.119254  | 0        | 0        | 2.087194 | 8.928508  | 4.278221 | 4.019918 |
| 15545 | LOC119627 | 3.271504 | 3.118244 | 1.795587 | 1.736615 | 0.082455  | 0.141014  | 0        | 0        | 2.087194 | 13.39276  | 2.139111 | 2.009959 |
| 9779  | CCDC88B   | 11.76769 | 3.117432 | 1.071609 | 2.909114 | 0.003625  | 0.009852  | 0        | 0.547412 | 6.957314 | 20.08914  | 29.94755 | 13.06473 |
| 16212 | HMGCS2    | 1.999263 | 3.116934 | 1.917597 | 1.625437 | 0.104069  | 0.170625  | 0        | 0.547412 | 0.695731 | 4.464254  | 4.278221 | 2.009959 |
| 16213 | DPEP3     | 1.999263 | 3.116934 | 1.917597 | 1.625437 | 0.104069  | 0.170625  | 0        | 0.547412 | 0.695731 | 4.464254  | 4.278221 | 2.009959 |
| 16214 | LOC119615 | 1.999263 | 3.116934 | 1.917597 | 1.625437 | 0.104069  | 0.170625  | 0        | 0.547412 | 0.695731 | 4.464254  | 4.278221 | 2.009959 |
| 5217  | LOC103234 | 32.99889 | 3.114982 | 0.681437 | 4.571193 | 4.85E-06  | 2.47E-05  | 1.626259 | 3.831883 | 15.30609 | 69.19594  | 74.86887 | 33.16432 |
| 16740 | ZNF683    | 3.308532 | 3.114804 | 2.029035 | 1.535116 | 0.124755  | 0.198126  | 0        | 0        | 2.087194 | 15.62489  | 2.139111 | 0        |
| 9087  | LOC103247 | 13.77298 | 3.114508 | 1.009011 | 3.086694 | 0.002024  | 0.005921  | 0        | 1.094824 | 7.653045 | 22.32127  | 38.50399 | 13.06473 |
| 16140 | FEZF2     | 4.401027 | 3.114322 | 1.899752 | 1.639331 | 0.101144  | 0.1666    | 0        | 0        | 2.782925 | 2.232127  | 21.39111 | 0        |
| 12246 | LOC119620 | 5.186343 | 3.11399  | 1.320872 | 2.357527 | 0.018397  | 0.039939  | 0.542086 | 0        | 2.782925 | 8.928508  | 12.83466 | 6.029877 |
| 13447 | X         |          |          |          |          |           |           |          |          |          |           |          |          |



|       |           |          |          |          |          |          |          |          |          |          |          |          |          |
|-------|-----------|----------|----------|----------|----------|----------|----------|----------|----------|----------|----------|----------|----------|
| 9600  | AKR1D1    | 11.5815  | 3.113052 | 1.051343 | 2.961025 | 0.003066 | 0.008491 | 0        | 1.094824 | 6.261582 | 17.85702 | 34.22577 | 10.04979 |
| 13461 | LOC103232 | 5.438001 | 3.112489 | 1.471405 | 2.115318 | 0.034403 | 0.067944 | 0        | 0        | 3.478657 | 11.16063 | 14.97377 | 3.014938 |
| 3559  | LOC103232 | 28.06284 | 3.112417 | 0.536712 | 5.799049 | 6.67E-09 | 4.98E-08 | 4.336691 | 7.663765 | 5.565851 | 40.17829 | 51.33866 | 59.29379 |
| 2313  | LOC103218 | 47.02561 | 3.112053 | 0.42084  | 7.394857 | 1.42E-13 | 1.63E-12 | 10.84173 | 9.306001 | 9.044508 | 64.73168 | 104.8164 | 83.4133  |
| 16328 | LOC119624 | 1.982873 | 3.111945 | 1.944944 | 1.600017 | 0.109595 | 0.17844  | 0.542086 | 0        | 0.695731 | 2.232127 | 6.417332 | 2.009959 |
| 9856  | LOC119624 | 6.760063 | 3.111617 | 1.076045 | 2.891717 | 0.003831 | 0.010335 | 1.084173 | 1.642235 | 1.391463 | 11.16063 | 19.252   | 6.029877 |
| 9758  | LYPD5     | 9.352103 | 3.111518 | 1.067698 | 2.914229 | 0.003566 | 0.009714 | 0.542086 | 0.547412 | 4.87012  | 11.16063 | 29.94755 | 9.044815 |
| 10934 | WNT10A    | 6.002036 | 3.110771 | 1.176789 | 2.64344  | 0.008207 | 0.019954 | 1.084173 | 0.547412 | 2.087194 | 11.16063 | 17.11289 | 4.019918 |
| 14938 | PPP1R1C   | 2.77704  | 3.110087 | 1.683674 | 1.847203 | 0.064718 | 0.115177 | 1.084173 | 0.547412 | 0        | 4.464254 | 8.556443 | 2.009959 |
| 5256  | SLC22A3   | 16.85298 | 3.109813 | 0.683488 | 4.549918 | 5.37E-06 | 2.71E-05 | 4.336691 | 3.284471 | 2.782925 | 40.17829 | 21.39111 | 29.1444  |
| 11407 | CLEC4F    | 7.332202 | 3.109197 | 1.226804 | 2.534388 | 0.011264 | 0.02625  | 0        | 0.547412 | 4.174388 | 6.696381 | 23.53022 | 9.044815 |
| 4234  | NLGN4X    | 35.00272 | 3.107536 | 0.597899 | 5.197424 | 2.02E-07 | 1.27E-06 | 2.168345 | 6.02153  | 13.91463 | 60.26743 | 83.42532 | 44.2191  |
| 8289  | MOGAT3    | 9.735177 | 3.107144 | 0.93684  | 3.316623 | 0.000911 | 0.002922 | 0.542086 | 2.737059 | 2.782925 | 15.62489 | 25.66933 | 11.05477 |
| 2890  | LRG1      | 41.194   | 3.106933 | 0.473492 | 6.561741 | 5.32E-11 | 4.89E-10 | 10.84173 | 7.663765 | 6.957314 | 53.57105 | 104.8164 | 63.31371 |
| 7448  | LOC119618 | 16.00395 | 3.106557 | 0.867066 | 3.58284  | 0.00034  | 0.001213 | 1.084173 | 3.284471 | 5.565851 | 49.10679 | 29.94755 | 7.034856 |
| 5465  | LOC119624 | 17.76377 | 3.106417 | 0.70091  | 4.431978 | 9.34E-06 | 4.54E-05 | 2.168345 | 2.737059 | 6.261582 | 37.94616 | 36.36488 | 21.10457 |
| 15084 | OTOP3     | 3.187968 | 3.106379 | 1.707636 | 1.819112 | 0.068894 | 0.121424 | 0        | 0        | 2.087194 | 4.464254 | 8.556443 | 4.019918 |
| 8469  | LOC119624 | 16.69226 | 3.10601  | 0.951995 | 3.262632 | 0.001104 | 0.003465 | 0        | 5.474118 | 4.87012  | 35.71403 | 47.06043 | 7.034856 |
| 12275 | NXNL1     | 5.041523 | 3.105703 | 1.321637 | 2.34989  | 0.018779 | 0.040671 | 0        | 1.094824 | 2.087194 | 15.62489 | 6.417332 | 5.024897 |
| 8593  | LOC103218 | 11.54311 | 3.104222 | 0.960671 | 3.231305 | 0.001232 | 0.003812 | 0        | 4.379295 | 2.782925 | 20.08914 | 29.94755 | 12.05975 |
| 14343 | LRAT      | 4.025186 | 3.103728 | 1.588666 | 1.95367  | 0.05074  | 0.094041 | 0.542086 | 0.547412 | 1.391463 | 6.696381 | 14.97377 | 0        |
| 17179 | LOC103222 | 1.96737  | 3.103366 | 2.109768 | 1.470951 | 0.141304 | 0.218673 | 0.542086 | 0        | 0.695731 | 0        | 8.556443 | 2.009959 |
| 12604 | GFR3      | 4.563449 | 3.102702 | 1.359699 | 2.281904 | 0.022495 | 0.047448 | 0.542086 | 2.189647 | 0        | 8.928508 | 10.69555 | 5.024897 |
| 17238 | DPPA5     | 2.020788 | 3.101529 | 2.12215  | 1.461504 | 0.143877 | 0.221892 | 0        | 0.547412 | 0.695731 | 4.464254 | 6.417332 | 0        |
| 9654  | PNMA6F    | 12.61501 | 3.100768 | 1.052656 | 2.945661 | 0.003223 | 0.008874 | 0        | 1.094824 | 6.957314 | 20.08914 | 38.50399 | 9.044815 |
| 7325  | MORN3     | 10.59277 | 3.100506 | 0.855136 | 3.625748 | 0.000288 | 0.001046 | 2.168345 | 1.642235 | 2.782925 | 26.78552 | 17.11289 | 13.06473 |
| 8253  | EPN3      | 11.05535 | 3.099782 | 0.931136 | 3.329031 | 0.000871 | 0.002807 | 1.626259 | 0.547412 | 4.87012  | 31.24978 | 14.97377 | 13.06473 |
| 17189 | CPO       | 1.968257 | 3.099239 | 2.109424 | 1.469235 | 0.141769 | 0.219264 | 0        | 0.547412 | 0.695731 | 0        | 8.556443 | 2.009959 |
| 2563  | LOC119624 | 81.84411 | 3.09906  | 0.440801 | 7.030521 | 2.06E-12 | 2.13E-11 | 14.09425 | 7.663765 | 29.91645 | 151.7846 | 186.1026 | 101.5029 |
| 7730  | ATP1B4    | 22.15242 | 3.099006 | 0.889709 | 3.48317  | 0.000496 | 0.001704 | 1.084173 | 0.547412 | 12.52316 | 33.4819  | 64.17332 | 21.10457 |
| 17305 | LOC119618 | 1.800136 | 3.098698 | 2.140072 | 1.447941 | 0.147634 | 0.226808 | 0.542086 | 0.547412 | 0        | 6.696381 | 0        | 3.014938 |
| 10272 | LOC103244 | 8.271654 | 3.098672 | 1.108562 | 2.795218 | 0.005186 | 0.013423 | 0.542086 | 0.547412 | 4.174388 | 20.08914 | 19.252   | 5.024897 |
| 10003 | BRDT      | 8.015749 | 3.098274 | 1.083172 | 2.86037  | 0.004231 | 0.011246 | 0        | 1.642235 | 3.478657 | 20.08914 | 12.83466 | 10.04979 |
| 6979  | CHRNE     | 20.74201 | 3.09816  | 0.827914 | 3.742126 | 0.000182 | 0.000695 | 0.542086 | 1.642235 | 11.1317  | 37.94616 | 47.06043 | 26.12947 |
| 9974  | LOC119624 | 7.440947 | 3.097692 | 1.079593 | 2.869316 | 0.004114 | 0.010965 | 2.710432 | 1.094824 | 0.695731 | 24.5534  | 8.556443 | 7.034856 |
| 12209 | LOC103235 | 9.66939  | 3.096037 | 1.308908 | 2.365359 | 0.018013 | 0.039223 | 0        | 0        | 6.261582 | 4.464254 | 34.22577 | 13.06473 |
| 10126 | GHSR      | 10.26232 | 3.094761 | 1.09288  | 2.831749 | 0.004629 | 0.012154 | 0        | 1.642235 | 4.87012  | 20.08914 | 29.94755 | 5.024897 |
| 7241  | GPR61     | 15.03669 | 3.094252 | 0.846517 | 3.655275 | 0.000257 | 0.000943 | 0.542086 | 2.737059 | 6.261582 | 31.24978 | 36.36488 | 13.06473 |
| 5290  | SDK2      | 25.5112  | 3.093414 | 0.68398  | 4.522664 | 6.11E-06 | 3.07E-05 | 4.336691 | 3.284471 | 8.348776 | 53.57105 | 68.45154 | 15.07469 |
| 11841 | CTSV      | 4.978624 | 3.092545 | 1.268024 | 2.43887  | 0.014733 | 0.033079 | 0.542086 | 0.547412 | 2.087194 | 6.696381 | 14.97377 | 5.024897 |
| 8237  | LOC119624 | 11.04764 | 3.092208 | 0.927057 | 3.33551  | 0.000851 | 0.002748 | 0.542086 | 1.642235 | 4.87012  | 26.78552 | 21.39111 | 11.05477 |
| 6095  | NXPH3     | 38.40201 | 3.09098  | 0.749473 | 4.124204 | 3.72E-05 | 0.000162 | 0.542086 | 3.831883 | 20.17621 | 80.35657 | 81.28621 | 44.2191  |
| 13214 | MPPED2    | 5.051793 | 3.090803 | 1.427355 | 2.165406 | 0.030357 | 0.061074 | 1.084173 | 0        | 2.087194 | 11.16063 | 14.97377 | 1.004979 |
| 15835 | LOC119624 | 30.53668 | 3.090338 | 1.825562 | 1.692815 | 0.090491 | 0.151923 | 0        | 0.547412 | 18.78475 | 44.64254 | 94.12087 | 25.12449 |
| 11401 | LOC119624 | 7.272337 | 3.090265 | 1.218586 | 2.535944 | 0.011214 | 0.02615  | 0.542086 | 0        | 4.174388 | 22.32127 | 8.556443 | 8.039836 |
| 11980 | IL31RA    | 8.456332 | 3.089979 | 1.282448 | 2.409437 | 0.015977 | 0.035455 | 0        | 0        | 5.565851 | 6.696381 | 21.39111 | 17.08465 |
| 6316  | LOC103218 | 19.84709 | 3.088923 | 0.768685 | 4.01845  | 5.86E-05 | 0.000247 | 3.252518 | 1.642235 | 7.653045 | 35.71403 | 57.75599 | 13.06473 |
| 11191 | FAM186B   | 5.642586 | 3.088572 | 1.195521 | 2.583452 | 0.009782 | 0.023235 | 1.084173 | 1.642235 | 0.695731 | 17.85702 | 8.556443 | 4.019918 |
| 7174  | LOC103235 | 19.96456 | 3.088155 | 0.840671 | 3.673439 | 0.000239 | 0.000887 | 0        | 4.379295 | 8.348776 | 33.4819  | 53.47777 | 20.09959 |
| 8796  | NR5A1     | 13.36587 | 3.088116 | 0.97244  | 3.175637 | 0.001495 | 0.004519 | 0.542086 | 1.094824 | 6.957314 | 15.62489 | 44.92132 | 11.05477 |
| 12283 | CD48      | 8.579461 | 3.087784 | 1.314697 | 2.348666 | 0.018841 | 0.040779 | 0        | 0        | 5.565851 | 8.925808 | 29.94755 | 7.034856 |
| 19573 | LOC103226 | 0.990466 | 3.087602 | 2.837659 | 1.088081 | 0.27656  | 0.375564 | 0        | 0        | 0.695731 | 2.232127 | 0        | 3.014938 |
| 19574 | LOC103232 | 0.990466 | 3.087602 | 2.837659 | 1.088081 | 0.27656  | 0.375564 | 0        | 0        | 0.695731 | 2.232127 | 0        | 3.014938 |
| 19575 | GFRAL     | 0.990466 | 3.087602 | 2.837659 | 1.088081 | 0.27656  | 0.375564 | 0        | 0        | 0.695731 | 2.232127 | 0        | 3.014938 |
| 19577 | LOC103235 | 0.990466 | 3.087602 | 2.837659 | 1.088081 | 0.27656  | 0.375564 | 0        | 0        | 0.695731 | 2.232127 | 0        | 3.014938 |
| 8545  | ZKSCAN7   | 11.16451 | 3.087321 | 0.952389 | 3.241659 | 0.001188 | 0.003697 | 3.794605 | 1.642235 | 1.391463 | 15.62489 | 38.50399 | 6.029877 |
| 19641 | SERPINA11 | 0.965746 | 3.086865 | 2.860848 | 1.079004 | 0.280586 | 0.379786 | 0        | 0.547412 | 0        | 2.232127 | 0        | 3.014938 |
| 12252 | LOC103232 | 6.257776 | 3.086463 | 1.310209 | 2.355702 | 0.018488 | 0.040116 | 0        | 0.547412 | 3.478657 | 13.39276 | 17.11289 | 3.014938 |
| 11738 | LOC103244 | 4.726967 | 3.08589  | 1.254011 | 2.460815 | 0.013862 | 0.031396 | 1.084173 | 0.547412 | 1.391463 | 4.464254 | 12.83466 | 8.039836 |
| 10749 | RSP01     | 9.445744 | 3.08561  | 1.151412 | 2.679849 | 0.007366 | 0.018217 | 0        | 0.547412 | 5.565851 | 17.85702 | 25.66933 | 7.034856 |
| 3598  | PEG3      | 30.11305 | 3.085489 | 0.536925 | 5.746588 | 9.11E-09 | 6.73E-08 | 4.336691 | 7.663765 | 6.957314 | 44.64254 | 74.86887 | 42.20914 |
| 14275 | LOC119624 | 26.64824 | 3.084763 | 1.569359 | 1.965619 | 0.049343 | 0.091887 | 0        | 1.642235 | 15.30609 | 49.10679 | 72.72976 | 21.10457 |
| 9089  | SYNPO2    | 10.10599 | 3.084657 | 0.999529 | 3.086112 | 0.002028 | 0.005932 | 1.084173 | 0.547412 | 4.87012  | 31.24978 | 12.83466 | 10.04979 |
| 11721 | LOC119618 | 6.057761 | 3.084414 | 1.251345 | 2.46488  | 0.013706 | 0.031087 | 1.084173 | 0        | 2.782925 | 15.62489 | 12.83466 | 4.019918 |
| 10592 | LOC119624 | 11.61224 | 3.084393 | 1.132353 | 2.72388  | 0.006452 | 0.016194 | 0        | 0.547412 | 6.957314 | 15.62489 | 38.50399 | 8.039836 |
| 11107 | TSSK2     | 5.57544  | 3.084183 | 1.184499 | 2.603788 | 0.00922  | 0.022068 | 0.542086 | 2.189647 | 0.695731 | 11.16063 | 12.83466 | 6.029877 |
| 8241  | RASAL3    | 17.43296 | 3.083119 | 0.924797 | 3.33832  | 0.000857 | 0.002763 | 2.168345 | 0        | 9.044508 | 31.24978 | 47.06043 | 15.07469 |
| 13275 | NELL1     | 4.910591 | 3.082976 | 1.43225  | 2.15254  | 0.031355 | 0.062792 | 0.542086 | 0.547412 | 2.087194 | 0        | 19.252   | 7.034856 |
| 7438  | LOC103218 | 12.81243 | 3.082397 | 0.859677 | 3.585528 | 0.000336 | 0.001202 | 1.626259 | 1.642235 | 4.87012  | 22.32127 | 36.36488 | 10.04979 |
| 5814  | DMD       | 19.81938 | 3.082076 | 0.722286 | 4.267114 | 1.98E-05 | 9.05E-05 | 1.626259 | 2.737059 | 8.348776 | 40.17829 | 44.92132 | 21.10457 |
| 17283 | CDRT4     | 1.768243 | 3.081503 | 2.120975 | 1.452871 | 0.14626  | 0.224979 | 1.084173 | 0        | 0        | 2.232127 | 4.278221 | 3.014938 |
| 15138 | CUNH1orf3 | 3.744298 | 3.081065 | 1.704105 | 1.808025 | 0.070603 | 0.123991 | 0        |          |          |          |          |          |



|       |           |          |          |          |          |           |           |          |          |          |          |          |          |
|-------|-----------|----------|----------|----------|----------|-----------|-----------|----------|----------|----------|----------|----------|----------|
| 15041 | LOC119621 | 3.048282 | 3.078262 | 1.686164 | 1.825601 | 0.06791   | 0.120032  | 0        | 0.547412 | 1.391463 | 8.928508 | 6.417332 | 1.004979 |
| 6398  | NLRP1     | 22.50261 | 3.077242 | 0.773073 | 3.980532 | 6.88E-05  | 0.000286  | 1.084173 | 4.926706 | 8.348776 | 24.5534  | 77.00798 | 19.09461 |
| 14818 | LOC103221 | 2.758709 | 3.076391 | 1.645964 | 1.869051 | 0.061616  | 0.110547  | 1.084173 | 0        | 0.695731 | 4.464254 | 4.278221 | 6.029877 |
| 14593 | LOC103221 | 3.577065 | 3.075868 | 1.612051 | 1.908046 | 0.056385  | 0.102721  | 0        | 2.189647 | 0        | 6.696381 | 8.556443 | 4.019918 |
| 10759 | ACSM5     | 6.997472 | 3.074961 | 1.148383 | 2.677645 | 0.007414  | 0.01832   | 0        | 1.094824 | 3.478657 | 13.39276 | 14.97377 | 9.044815 |
| 17280 | LOC103241 | 19.55582 | 3.074528 | 2.115493 | 1.453338 | 0.14613   | 0.224818  | 0        | 0        | 12.52316 | 40.17829 | 38.50399 | 26.12947 |
| 11687 | CUNH16or  | 5.861298 | 3.074252 | 1.242656 | 2.473936 | 0.013363  | 0.030398  | 0        | 1.642235 | 2.087194 | 17.85702 | 8.556443 | 5.024897 |
| 13331 | PM20D1    | 3.986218 | 3.073994 | 1.434909 | 2.142292 | 0.03217   | 0.064154  | 0        | 0.547412 | 2.087194 | 6.696381 | 8.556443 | 6.029877 |
| 11419 | LOC103241 | 8.343769 | 3.073806 | 1.213988 | 2.531199 | 0.011342  | 0.026405  | 0        | 0.547412 | 4.87012  | 26.78552 | 12.83466 | 5.024897 |
| 10285 | LOC103221 | 8.001666 | 3.073347 | 1.10075  | 2.792049 | 0.005238  | 0.013538  | 1.084173 | 0        | 4.174388 | 17.85702 | 12.83466 | 12.05975 |
| 10203 | CALHM5    | 8.440888 | 3.072934 | 1.091394 | 2.815605 | 0.004869  | 0.012682  | 2.168345 | 1.642235 | 1.391463 | 15.62489 | 27.80844 | 2.009959 |
| 19679 | LOC119611 | 1.001887 | 3.072814 | 2.861572 | 1.07382  | 0.282903  | 0.382183  | 0.542086 | 0        | 0        | 4.464254 | 0        | 1.004979 |
| 19672 | AQP12B    | 1.002774 | 3.072793 | 2.860775 | 1.074112 | 0.282773  | 0.382045  | 0        | 0.547412 | 0        | 4.464254 | 0        | 1.004979 |
| 19673 | SLC10A2   | 1.002774 | 3.072793 | 2.860775 | 1.074112 | 0.282773  | 0.382045  | 0        | 0.547412 | 0        | 4.464254 | 0        | 1.004979 |
| 19674 | LOC119621 | 1.002774 | 3.072793 | 2.860775 | 1.074112 | 0.282773  | 0.382045  | 0        | 0.547412 | 0        | 4.464254 | 0        | 1.004979 |
| 19675 | LOC103211 | 1.002774 | 3.072793 | 2.860775 | 1.074112 | 0.282773  | 0.382045  | 0        | 0.547412 | 0        | 4.464254 | 0        | 1.004979 |
| 19676 | LOC119611 | 1.002774 | 3.072793 | 2.860775 | 1.074112 | 0.282773  | 0.382045  | 0        | 0.547412 | 0        | 4.464254 | 0        | 1.004979 |
| 19677 | LOC119621 | 1.002774 | 3.072793 | 2.860775 | 1.074112 | 0.282773  | 0.382045  | 0        | 0.547412 | 0        | 4.464254 | 0        | 1.004979 |
| 19623 | LOC119621 | 1.027494 | 3.072205 | 2.838992 | 1.082146 | 0.279188  | 0.37824   | 0        | 0        | 0.695731 | 4.464254 | 0        | 1.004979 |
| 7196  | CIITA     | 14.67095 | 3.07201  | 0.837376 | 3.668613 | 0.000244  | 0.000901  | 0.542086 | 3.284471 | 5.565851 | 33.4819  | 32.08666 | 13.06473 |
| 6852  | ALOX15B   | 12.39956 | 3.071876 | 0.80938  | 3.795345 | 0.000147  | 0.000572  | 2.168345 | 2.189647 | 3.478657 | 24.5534  | 29.94755 | 12.05975 |
| 8342  | SCRT1     | 17.5654  | 3.071131 | 0.930759 | 3.299597 | 0.000968  | 0.003085  | 0.542086 | 1.094824 | 9.740239 | 40.17829 | 42.78221 | 11.05477 |
| 12261 | LOC103221 | 4.838051 | 3.070032 | 1.304344 | 2.353698 | 0.018588  | 0.040303  | 1.084173 | 0.547412 | 1.391463 | 11.16063 | 12.83466 | 2.009959 |
| 5695  | LOC103241 | 17.3506  | 3.069628 | 0.709102 | 4.328894 | 1.50E-05  | 7.00E-05  | 5.96295  | 2.189647 | 2.782925 | 44.64254 | 21.39111 | 27.13445 |
| 8422  | GPR50     | 16.35366 | 3.069465 | 0.937057 | 3.275644 | 0.001054  | 0.003328  | 0        | 1.642235 | 9.044508 | 24.5534  | 42.78221 | 20.09959 |
| 14992 | LY96      | 2.743207 | 3.069217 | 1.672255 | 1.835377 | 0.06645   | 0.11782   | 1.084173 | 0        | 0.695731 | 2.232127 | 6.417332 | 6.029877 |
| 19661 | MAGEH1    | 0.974963 | 3.069001 | 2.850857 | 1.076519 | 0.281695  | 0.38088   | 0        | 0        | 0.695731 | 0        | 2.139111 | 3.014938 |
| 19662 | LOC119621 | 0.974963 | 3.069001 | 2.850857 | 1.076519 | 0.281695  | 0.38088   | 0        | 0        | 0.695731 | 0        | 2.139111 | 3.014938 |
| 9581  | LOC103241 | 13.42248 | 3.068789 | 1.034845 | 2.965458 | 0.003022  | 0.008386  | 0        | 1.094824 | 7.653045 | 20.08914 | 40.6431  | 11.05477 |
| 13867 | LOC119621 | 3.558899 | 3.068276 | 1.506652 | 2.036487 | 0.041701  | 0.079948  | 1.626259 | 0.547412 | 0        | 4.464254 | 10.69555 | 4.019918 |
| 19710 | LOC103221 | 0.950243 | 3.068139 | 2.874605 | 1.067325 | 0.285825  | 0.385445  | 0        | 0.547412 | 0        | 0        | 2.139111 | 3.014938 |
| 19711 | LOC103241 | 0.950243 | 3.068139 | 2.874605 | 1.067325 | 0.285825  | 0.385445  | 0        | 0.547412 | 0        | 0        | 2.139111 | 3.014938 |
| 19713 | LOC103231 | 0.950243 | 3.068139 | 2.874605 | 1.067325 | 0.285825  | 0.385445  | 0        | 0.547412 | 0        | 0        | 2.139111 | 3.014938 |
| 13047 | AIRE      | 7.452503 | 3.067721 | 1.396726 | 2.196365 | 0.028066  | 0.057188  | 0        | 0        | 4.87012  | 11.16063 | 25.66933 | 3.014938 |
| 6184  | ECE2      | 15.1867  | 3.066631 | 0.750976 | 4.083527 | 4.44E-05  | 0.000191  | 2.710432 | 2.737059 | 4.174388 | 26.78552 | 40.6431  | 14.06971 |
| 15270 | LOC103221 | 2.848268 | 3.066314 | 1.718103 | 1.78471  | 0.074308  | 0.129371  | 1.084173 | 0        | 0.695731 | 11.16063 | 2.139111 | 2.009959 |
| 8817  | EBF2      | 9.375464 | 3.065903 | 0.967177 | 3.169949 | 0.001525  | 0.004597  | 0.542086 | 3.284471 | 2.087194 | 15.62489 | 25.66933 | 9.044815 |
| 16912 | MC4R      | 1.821662 | 3.065779 | 2.037833 | 1.504431 | 0.13247   | 0.208232  | 0.542086 | 0.547412 | 0        | 6.696381 | 2.139111 | 1.004979 |
| 8453  | LOC103241 | 9.322046 | 3.065045 | 0.937851 | 3.268158 | 0.001082  | 0.003404  | 1.084173 | 2.737059 | 2.087194 | 11.16063 | 27.80844 | 11.05477 |
| 7675  | PLA2G4F   | 21.38429 | 3.064633 | 0.875704 | 3.499622 | 0.000466  | 0.001614  | 2.168345 | 0.547412 | 11.1317  | 44.64254 | 57.75599 | 12.05975 |
| 11149 | PROZ      | 6.599477 | 3.064424 | 1.182076 | 2.592409 | 0.009531  | 0.022726  | 0.542086 | 2.189647 | 1.391463 | 8.928508 | 23.53022 | 3.014938 |
| 17557 | LOC103241 | 1.789769 | 3.062572 | 2.178025 | 1.406124 | 0.159687  | 0.2418    | 1.084173 | 0        | 0        | 2.232127 | 6.417332 | 1.004979 |
| 9988  | DPP6      | 9.931213 | 3.061417 | 1.069013 | 2.86378  | 0.004186  | 0.011142  | 0        | 1.642235 | 4.87012  | 8.928508 | 32.08666 | 12.05975 |
| 11712 | PERCC1    | 9.495447 | 3.061366 | 1.239798 | 2.469247 | 0.01354   | 0.030734  | 0        | 0        | 6.261582 | 24.5534  | 17.11289 | 9.044815 |
| 11762 | LOC119621 | 8.303284 | 3.061094 | 1.24671  | 2.455338 | 0.014075  | 0.031803  | 0        | 0.547412 | 4.87012  | 17.85702 | 23.53022 | 3.014938 |
| 11852 | RAB39B    | 9.516972 | 3.060125 | 1.256482 | 2.43547  | 0.014872  | 0.03336   | 0        | 0        | 6.261582 | 24.5534  | 19.252   | 7.034856 |
| 84    | DKK3      | 1646.393 | 3.059663 | 0.11932  | 25.64247 | 5.13E-145 | 1.62E-142 | 323.0835 | 359.1022 | 377.7821 | 2901.765 | 2701.697 | 3214.929 |
| 14851 | CD33      | 2.780235 | 3.059464 | 1.642996 | 1.862125 | 0.062586  | 0.112035  | 1.084173 | 0        | 0.695731 | 4.464254 | 6.417332 | 4.019918 |
| 2456  | CIDEC     | 45.16175 | 3.058986 | 0.425471 | 7.18965  | 6.50E-13  | 7.03E-12  | 6.505036 | 1.094824 | 11.82743 | 78.12444 | 79.14709 | 84.41828 |
| 13961 | C2CD4A    | 4.761425 | 3.058798 | 1.51466  | 2.019462 | 0.043439  | 0.082718  | 0.542086 | 1.094824 | 1.391463 | 0        | 23.53022 | 2.009959 |
| 13412 | HAS1      | 59.26352 | 3.058641 | 1.439484 | 2.124817 | 0.033602  | 0.066605  | 1.084173 | 1.642235 | 35.4823  | 156.2489 | 121.9293 | 39.1942  |
| 6092  | LOC103241 | 19.32449 | 3.058129 | 0.741212 | 4.125848 | 3.69E-05  | 0.000161  | 1.084173 | 3.831883 | 7.653045 | 26.78552 | 53.47777 | 23.11453 |
| 6285  | LOC103231 | 19.72825 | 3.056036 | 0.75738  | 4.035012 | 5.46E-05  | 0.000231  | 2.168345 | 1.642235 | 9.044508 | 44.64254 | 42.78221 | 18.08963 |
| 8826  | CYP2A28   | 16.40761 | 3.055615 | 0.965334 | 3.165346 | 0.001549  | 0.004666  | 1.084173 | 0        | 9.740239 | 29.01765 | 38.50399 | 20.09959 |
| 17585 | CEACAM11  | 1.791544 | 3.054067 | 2.177142 | 1.402787 | 0.16068   | 0.242916  | 0        | 1.094824 | 0        | 2.232127 | 6.417332 | 1.004979 |
| 11658 | OLIG2     | 10.54447 | 3.053517 | 1.23161  | 2.47929  | 0.013164  | 0.03002   | 0        | 0        | 6.957314 | 29.01765 | 19.252   | 8.039836 |
| 12862 | LOC103241 | 3.808616 | 3.053261 | 1.371584 | 2.226084 | 0.026009  | 0.053758  | 0.542086 | 0.547412 | 1.391463 | 8.928508 | 6.417332 | 5.024897 |
| 13923 | SCGB1C1   | 4.029268 | 3.053142 | 1.506149 | 2.027119 | 0.04265   | 0.081438  | 0        | 0.547412 | 2.087194 | 6.696381 | 12.83466 | 2.009959 |
| 5783  | LOC103211 | 31.98161 | 3.051583 | 0.712447 | 4.28324  | 1.84E-05  | 8.47E-05  | 1.626259 | 3.284471 | 16.00182 | 66.96381 | 74.86887 | 29.1444  |
| 11790 | GYS2      | 5.689719 | 3.051069 | 1.244327 | 2.451984 | 0.014207  | 0.032035  | 0.542086 | 1.642235 | 1.391463 | 17.85702 | 10.69555 | 2.009959 |
| 9621  | NPM2      | 15.39996 | 3.050777 | 1.032305 | 2.955305 | 0.003124  | 0.008631  | 0        | 1.094824 | 9.044508 | 17.85702 | 51.33866 | 13.06473 |
| 12923 | GAPT      | 5.055875 | 3.050413 | 1.375462 | 2.217737 | 0.026573  | 0.054665  | 0.542086 | 0        | 2.782925 | 11.16063 | 12.83466 | 3.014938 |
| 4704  | LOC119621 | 21.67263 | 3.050395 | 0.624863 | 4.8817   | 1.05E-06  | 5.94E-06  | 3.252518 | 3.284471 | 7.653045 | 33.4819  | 49.19955 | 33.16432 |
| 180   | ADAMTS11  | 775.5171 | 3.048871 | 0.145857 | 20.90319 | 5.01E-97  | 7.40E-95  | 181.5989 | 143.9693 | 177.4115 | 1352.669 | 1274.91  | 1522.544 |
| 6298  | CTNND2    | 15.0511  | 3.048817 | 0.75718  | 4.026544 | 5.66E-05  | 0.000239  | 2.168345 | 3.284471 | 4.174388 | 31.24978 | 36.36488 | 13.06473 |
| 10470 | TMEM178   | 6.662907 | 3.048808 | 1.108056 | 2.751493 | 0.005932  | 0.015063  | 1.626259 | 0.547412 | 2.087194 | 17.85702 | 12.83466 | 5.024897 |
| 8852  | LOC103221 | 11.50257 | 3.048588 | 0.965893 | 3.156239 | 0.001598  | 0.0048    | 0        | 3.284471 | 4.174388 | 31.24978 | 19.252   | 11.05477 |
| 8120  | GAS2L2    | 14.76387 | 3.048569 | 0.903951 | 3.372493 | 0.000745  | 0.002439  | 0.542086 | 2.189647 | 6.957314 | 15.62489 | 49.19955 | 14.06971 |
| 19174 | LOC103231 | 0.987271 | 3.047564 | 2.634381 | 1.156843 | 0.247337  | 0.342721  | 0        | 0.547412 | 0        | 2.232127 | 2.139111 | 1.004979 |
| 19175 | LOC103231 | 0.987271 | 3.047564 | 2.634381 | 1.156843 | 0.247337  | 0.342721  | 0        | 0.547412 | 0        | 2.232127 | 2.139111 | 1.004979 |
| 19176 | LOC119621 | 0.987271 | 3.047564 | 2.634381 | 1.156843 | 0.247337  | 0.342721  | 0        | 0.547412 | 0        | 2.232127 | 2.139111 | 1.004979 |
| 19177 | GJB7      | 0.987271 | 3.047564 | 2.634381 | 1.156843 | 0.247337  | 0.342721  | 0        | 0.547412 | 0        | 2.232127 | 2.139111 | 1.004979 |
| 19178 | LOC119621 | 0.987271 | 3.047564 | 2.634381 | 1.156843 | 0.24      |           |          |          |          |          |          |          |



|       |           |          |          |          |          |          |          |          |          |          |          |          |          |
|-------|-----------|----------|----------|----------|----------|----------|----------|----------|----------|----------|----------|----------|----------|
| 19182 | LOC119621 | 0.987271 | 3.047564 | 2.634381 | 1.156843 | 0.247337 | 0.342721 | 0        | 0.547412 | 0        | 2.232127 | 2.139111 | 1.004979 |
| 19183 | LOC103227 | 0.987271 | 3.047564 | 2.634381 | 1.156843 | 0.247337 | 0.342721 | 0        | 0.547412 | 0        | 2.232127 | 2.139111 | 1.004979 |
| 19184 | CCDC182   | 0.987271 | 3.047564 | 2.634381 | 1.156843 | 0.247337 | 0.342721 | 0        | 0.547412 | 0        | 2.232127 | 2.139111 | 1.004979 |
| 19185 | LOC103229 | 0.987271 | 3.047564 | 2.634381 | 1.156843 | 0.247337 | 0.342721 | 0        | 0.547412 | 0        | 2.232127 | 2.139111 | 1.004979 |
| 19186 | LOC103234 | 0.987271 | 3.047564 | 2.634381 | 1.156843 | 0.247337 | 0.342721 | 0        | 0.547412 | 0        | 2.232127 | 2.139111 | 1.004979 |
| 19122 | LOC119625 | 1.011991 | 3.046997 | 2.616102 | 1.164709 | 0.244137 | 0.339313 | 0        | 0        | 0.695731 | 2.232127 | 2.139111 | 1.004979 |
| 19123 | LOC119627 | 1.011991 | 3.046997 | 2.616102 | 1.164709 | 0.244137 | 0.339313 | 0        | 0        | 0.695731 | 2.232127 | 2.139111 | 1.004979 |
| 19124 | VENTX     | 1.011991 | 3.046997 | 2.616102 | 1.164709 | 0.244137 | 0.339313 | 0        | 0        | 0.695731 | 2.232127 | 2.139111 | 1.004979 |
| 19125 | LOC103230 | 1.011991 | 3.046997 | 2.616102 | 1.164709 | 0.244137 | 0.339313 | 0        | 0        | 0.695731 | 2.232127 | 2.139111 | 1.004979 |
| 19126 | LOC103231 | 1.011991 | 3.046997 | 2.616102 | 1.164709 | 0.244137 | 0.339313 | 0        | 0        | 0.695731 | 2.232127 | 2.139111 | 1.004979 |
| 19127 | HRG       | 1.011991 | 3.046997 | 2.616102 | 1.164709 | 0.244137 | 0.339313 | 0        | 0        | 0.695731 | 2.232127 | 2.139111 | 1.004979 |
| 19128 | LOC119628 | 1.011991 | 3.046997 | 2.616102 | 1.164709 | 0.244137 | 0.339313 | 0        | 0        | 0.695731 | 2.232127 | 2.139111 | 1.004979 |
| 12207 | LOC103235 | 4.608806 | 3.046693 | 1.287903 | 2.365623 | 0.018    | 0.039201 | 1.084173 | 1.094824 | 0.695731 | 8.928508 | 12.83466 | 3.014938 |
| 10482 | KRT84     | 6.664682 | 3.046521 | 1.108282 | 2.748869 | 0.00598  | 0.015167 | 0.542086 | 1.642235 | 2.087194 | 17.85702 | 12.83466 | 5.024897 |
| 4109  | HECW1     | 54.80439 | 3.045445 | 0.575854 | 5.288571 | 1.23E-07 | 7.98E-07 | 3.794605 | 10.94824 | 20.87194 | 95.98146 | 154.016  | 43.21412 |
| 9305  | CUNH4orf3 | 10.53876 | 3.045329 | 1.004634 | 3.031283 | 0.002435 | 0.006957 | 0.542086 | 2.737059 | 3.478657 | 26.78552 | 25.66933 | 4.019918 |
| 9750  | MROH2B    | 10.00758 | 3.043021 | 1.043146 | 2.917156 | 0.003532 | 0.009632 | 0.542086 | 0.547412 | 5.565851 | 13.39276 | 29.94755 | 10.04979 |
| 10244 | NUTM2F    | 10.06099 | 3.042549 | 1.085068 | 2.804018 | 0.005047 | 0.013098 | 0        | 1.094824 | 5.565851 | 17.85702 | 27.80844 | 8.039836 |
| 14558 | CFAP299   | 2.81815  | 3.04187  | 1.58932  | 1.913944 | 0.055627 | 0.101583 | 0.542086 | 0.547412 | 0.695731 | 6.696381 | 6.417332 | 2.009959 |
| 11651 | MAGEA4    | 10.42992 | 3.041127 | 1.225791 | 2.48095  | 0.013103 | 0.029899 | 0        | 0        | 6.957314 | 15.62489 | 29.94755 | 10.04979 |
| 7073  | CPXM2     | 14.87093 | 3.040919 | 0.820999 | 3.703926 | 0.000212 | 0.000798 | 2.168345 | 3.831883 | 3.478657 | 26.78552 | 44.92132 | 8.039836 |
| 8577  | TAC3      | 10.72726 | 3.038929 | 0.939556 | 3.23443  | 0.001219 | 0.003778 | 1.084173 | 1.094824 | 4.87012  | 29.01765 | 19.252   | 9.044815 |
| 12297 | LOC103224 | 8.331461 | 3.038547 | 1.295752 | 2.345007 | 0.019027 | 0.041134 | 0        | 0        | 5.565851 | 24.5534  | 12.83466 | 7.034856 |
| 15137 | HTR2C     | 2.803535 | 3.038477 | 1.680491 | 1.808089 | 0.070593 | 0.123981 | 0        | 1.094824 | 0.695731 | 4.464254 | 8.556443 | 2.009959 |
| 16249 | MS4A15    | 2.770755 | 3.038186 | 1.878443 | 1.617396 | 0.105793 | 0.173088 | 1.084173 | 0        | 0.695731 | 0        | 12.83466 | 2.009959 |
| 8026  | GAD1      | 14.79629 | 3.038129 | 0.89248  | 3.404141 | 0.000664 | 0.002198 | 1.626259 | 0.547412 | 7.653045 | 20.08914 | 42.78221 | 16.07967 |
| 9957  | IL12B     | 7.630165 | 3.036398 | 1.056791 | 2.873224 | 0.004063 | 0.010848 | 0.542086 | 1.642235 | 2.782925 | 13.39276 | 21.39111 | 6.029877 |
| 12514 | LOC103225 | 4.79049  | 3.035891 | 1.320632 | 2.298817 | 0.021515 | 0.045708 | 0        | 1.094824 | 2.087194 | 6.696381 | 12.83466 | 6.029877 |
| 19817 | LOC103228 | 0.970881 | 3.034603 | 2.887543 | 1.050929 | 0.293291 | 0.393378 | 0.542086 | 0        | 0        | 0        | 4.278221 | 1.004979 |
| 19818 | LOC119626 | 0.970881 | 3.034603 | 2.887543 | 1.050929 | 0.293291 | 0.393378 | 0.542086 | 0        | 0        | 0        | 4.278221 | 1.004979 |
| 19819 | LOC119619 | 0.970881 | 3.034603 | 2.887543 | 1.050929 | 0.293291 | 0.393378 | 0.542086 | 0        | 0        | 0        | 4.278221 | 1.004979 |
| 19820 | LOC119620 | 0.970881 | 3.034603 | 2.887543 | 1.050929 | 0.293291 | 0.393378 | 0.542086 | 0        | 0        | 0        | 4.278221 | 1.004979 |
| 19811 | LOC119623 | 0.971769 | 3.034588 | 2.886707 | 1.051228 | 0.293154 | 0.393293 | 0        | 0.547412 | 0        | 0        | 4.278221 | 1.004979 |
| 19812 | LOC103236 | 0.971769 | 3.034588 | 2.886707 | 1.051228 | 0.293154 | 0.393293 | 0        | 0.547412 | 0        | 0        | 4.278221 | 1.004979 |
| 19813 | PHGR1     | 0.971769 | 3.034588 | 2.886707 | 1.051228 | 0.293154 | 0.393293 | 0        | 0.547412 | 0        | 0        | 4.278221 | 1.004979 |
| 19814 | LOC103229 | 0.971769 | 3.034588 | 2.886707 | 1.051228 | 0.293154 | 0.393293 | 0        | 0.547412 | 0        | 0        | 4.278221 | 1.004979 |
| 19815 | LOC103227 | 0.971769 | 3.034588 | 2.886707 | 1.051228 | 0.293154 | 0.393293 | 0        | 0.547412 | 0        | 0        | 4.278221 | 1.004979 |
| 19753 | LOC119622 | 0.996489 | 3.03418  | 2.863886 | 1.059462 | 0.289389 | 0.389303 | 0        | 0        | 0.695731 | 0        | 4.278221 | 1.004979 |
| 19754 | LOC119625 | 0.996489 | 3.03418  | 2.863886 | 1.059462 | 0.289389 | 0.389303 | 0        | 0        | 0.695731 | 0        | 4.278221 | 1.004979 |
| 19755 | LOC103248 | 0.996489 | 3.03418  | 2.863886 | 1.059462 | 0.289389 | 0.389303 | 0        | 0        | 0.695731 | 0        | 4.278221 | 1.004979 |
| 19756 | LOC103229 | 0.996489 | 3.03418  | 2.863886 | 1.059462 | 0.289389 | 0.389303 | 0        | 0        | 0.695731 | 0        | 4.278221 | 1.004979 |
| 19757 | SRARP     | 0.996489 | 3.03418  | 2.863886 | 1.059462 | 0.289389 | 0.389303 | 0        | 0        | 0.695731 | 0        | 4.278221 | 1.004979 |
| 19758 | LOC103247 | 0.996489 | 3.03418  | 2.863886 | 1.059462 | 0.289389 | 0.389303 | 0        | 0        | 0.695731 | 0        | 4.278221 | 1.004979 |
| 19759 | CUNH18orf | 0.996489 | 3.03418  | 2.863886 | 1.059462 | 0.289389 | 0.389303 | 0        | 0        | 0.695731 | 0        | 4.278221 | 1.004979 |
| 19760 | LOC119622 | 0.996489 | 3.03418  | 2.863886 | 1.059462 | 0.289389 | 0.389303 | 0        | 0        | 0.695731 | 0        | 4.278221 | 1.004979 |
| 19761 | LOC119627 | 0.996489 | 3.03418  | 2.863886 | 1.059462 | 0.289389 | 0.389303 | 0        | 0        | 0.695731 | 0        | 4.278221 | 1.004979 |
| 19762 | LOC103233 | 0.996489 | 3.03418  | 2.863886 | 1.059462 | 0.289389 | 0.389303 | 0        | 0        | 0.695731 | 0        | 4.278221 | 1.004979 |
| 12920 | SLC6A1    | 7.278984 | 3.032678 | 1.367322 | 2.21797  | 0.026557 | 0.054645 | 0        | 0        | 4.87012  | 13.39276 | 21.39111 | 4.019918 |
| 8300  | ANKRD45   | 22.34165 | 3.031914 | 0.915202 | 3.312836 | 0.000924 | 0.002958 | 0        | 1.642235 | 13.2189  | 46.87467 | 49.19955 | 23.11453 |
| 12645 | AMPD1     | 4.827518 | 3.031718 | 1.334652 | 2.271543 | 0.023114 | 0.048594 | 0        | 1.094824 | 2.087194 | 8.928508 | 12.83466 | 4.019918 |
| 16785 | LOC103235 | 2.793167 | 3.031152 | 1.983509 | 1.528177 | 0.126469 | 0.200304 | 0.542086 | 0.547412 | 0.695731 | 0        | 14.97377 | 0        |
| 14104 | KLK3      | 33.40478 | 3.031012 | 1.52047  | 1.99347  | 0.04621  | 0.087102 | 0        | 3.831883 | 18.08902 | 60.26743 | 94.12087 | 24.11951 |
| 7170  | MAP6      | 13.87497 | 3.030664 | 0.824838 | 3.674253 | 0.000239 | 0.000884 | 3.794605 | 1.642235 | 3.478657 | 26.78552 | 38.50399 | 9.044815 |
| 17897 | EPS8L3    | 24.37034 | 3.030627 | 2.225285 | 1.361905 | 0.173228 | 0.25732  | 0        | 0        | 16.00182 | 58.0353  | 47.06043 | 25.12449 |
| 8604  | LOC119621 | 11.14036 | 3.030599 | 0.939015 | 3.227423 | 0.001249 | 0.00386  | 3.252518 | 1.094824 | 2.782925 | 29.01765 | 25.66933 | 5.024897 |
| 17411 | SIT1      | 14.80298 | 3.030358 | 2.121943 | 1.428105 | 0.153262 | 0.234016 | 0        | 0        | 9.740239 | 37.94616 | 32.08666 | 9.044815 |
| 15379 | MUC5AC    | 21.96768 | 3.029769 | 1.717817 | 1.763732 | 0.077777 | 0.13445  | 0        | 0.547412 | 13.91463 | 44.64254 | 55.61688 | 17.08465 |
| 17077 | LOC119619 | 1.986955 | 3.027989 | 2.039792 | 1.48446  | 0.137687 | 0.214347 | 0        | 0        | 1.391463 | 2.232127 | 4.278221 | 4.019918 |
| 6962  | INSRR     | 19.72693 | 3.027423 | 0.806916 | 3.751842 | 0.000176 | 0.00067  | 1.084173 | 1.642235 | 10.43597 | 40.17829 | 44.92132 | 20.09959 |
| 4356  | FEZF1     | 22.63199 | 3.026603 | 0.592419 | 5.108892 | 3.24E-07 | 1.98E-06 | 2.710432 | 6.02153  | 6.261582 | 37.94616 | 40.6431  | 42.20914 |
| 10868 | LOC103226 | 9.0677   | 3.0252   | 1.139033 | 2.655937 | 0.007909 | 0.019345 | 0        | 0.547412 | 5.565851 | 17.85702 | 21.39111 | 9.044815 |
| 10869 | LOC103245 | 9.0677   | 3.0252   | 1.139033 | 2.655937 | 0.007909 | 0.019345 | 0        | 0.547412 | 5.565851 | 17.85702 | 21.39111 | 9.044815 |
| 7691  | SYNE4     | 11.29449 | 3.024661 | 0.865109 | 3.496277 | 0.000472 | 0.001631 | 2.168345 | 1.094824 | 4.174388 | 29.01765 | 19.252   | 12.05975 |
| 654   | SPOCK1    | 177.4838 | 3.024096 | 0.23104  | 13.08904 | 3.80E-39 | 1.55E-37 | 32.52518 | 47.07742 | 36.87376 | 303.5693 | 327.2839 | 317.5735 |
| 11884 | LOC119620 | 5.156286 | 3.024015 | 1.245092 | 2.428748 | 0.015151 | 0.033894 | 1.084173 | 2.189647 | 0        | 8.928508 | 10.69555 | 8.039836 |
| 9398  | ANKLE1    | 11.82986 | 3.02357  | 1.005351 | 3.007477 | 0.002634 | 0.007452 | 0.542086 | 1.094824 | 6.261582 | 13.39276 | 40.6431  | 9.044815 |
| 5014  | SIGLEC9   | 28.23423 | 3.023546 | 0.64601  | 4.680341 | 2.86E-06 | 1.52E-05 | 1.084173 | 6.02153  | 11.82743 | 46.87467 | 51.33866 | 52.25893 |
| 8196  | LOC119621 | 11.48414 | 3.022296 | 0.902746 | 3.34789  | 0.000814 | 0.002641 | 1.626259 | 1.094824 | 4.87012  | 22.32127 | 29.94755 | 9.044815 |
| 2724  | LOC103230 | 42.77277 | 3.020986 | 0.443475 | 6.812081 | 9.62E-12 | 9.39E-11 | 9.215468 | 6.02153  | 13.2189  | 73.66019 | 79.14709 | 75.37346 |
| 8787  | LOC103225 | 13.83143 | 3.020733 | 0.950629 | 3.177615 | 0.001485 | 0.004493 | 1.084173 | 0.547412 | 7.653045 | 17.85702 | 42.78221 | 13.06473 |
| 14553 | GIMAP4    | 4.041943 | 3.020086 | 1.576163 | 1.916101 | 0.055352 | 0.101116 | 0        | 0        | 2.782925 | 11.16063 | 4.278221 | 6.029877 |
| 16374 | LOC103225 | 2.608656 | 3.019502 | 1.895105 | 1.593316 | 0.11089  | 0.180366 | 1.626259 | 0        | 0        | 4.464254 | 8.556443 | 1.004979 |
| 17048 | NPHS2     | 2.023983 | 3.018701 | 2.03028  | 1.48684  | 0.137057 | 0.213704 | 0        | 0        | 1.391463 | 4.464254 | 4.278221 | 2.009959 |
| 17049 | LOC103231 | 2.023983 | 3.018701 | 2.03028  | 1.48684  |          |          |          |          |          |          |          |          |



|       |           |          |          |          |          |          |          |          |          |          |          |          |          |
|-------|-----------|----------|----------|----------|----------|----------|----------|----------|----------|----------|----------|----------|----------|
| 17050 | SAGE1     | 2.023983 | 3.018701 | 2.03028  | 1.48684  | 0.137057 | 0.213704 | 0        | 0        | 1.391463 | 4.464254 | 4.278221 | 2.009959 |
| 15500 | KCNK16    | 2.998946 | 3.018402 | 1.730298 | 1.74444  | 0.081082 | 0.139069 | 0        | 0        | 2.087194 | 4.464254 | 6.417332 | 5.024897 |
| 6185  | LOC119621 | 20.74349 | 3.017666 | 0.739055 | 4.083141 | 4.44E-05 | 0.000191 | 2.710432 | 3.284471 | 7.653045 | 35.71403 | 62.03421 | 13.06473 |
| 6474  | LOC103231 | 16.89166 | 3.017255 | 0.763725 | 3.950709 | 7.79E-05 | 0.00032  | 1.084173 | 3.284471 | 6.957314 | 44.64254 | 19.252   | 26.12947 |
| 7137  | RASGRF2   | 12.04199 | 3.017107 | 0.818894 | 3.684366 | 0.000229 | 0.000854 | 1.084173 | 2.737059 | 4.174388 | 26.78552 | 21.39111 | 16.07967 |
| 11058 | ALAS2     | 7.832487 | 3.016897 | 1.154373 | 2.61345  | 0.008963 | 0.021549 | 0        | 1.094824 | 4.174388 | 11.16063 | 23.53022 | 7.034856 |
| 18168 | LY6D      | 2.076514 | 3.016744 | 2.304052 | 1.309321 | 0.190426 | 0.278647 | 0        | 0        | 1.391463 | 8.928508 | 2.139111 | 0        |
| 3745  | CACNA1E   | 62.11969 | 3.015718 | 0.538763 | 5.59749  | 2.17E-08 | 1.54E-07 | 7.589209 | 6.568942 | 27.13352 | 113.8385 | 158.2942 | 59.29379 |
| 2178  | CFAP73    | 58.81647 | 3.015231 | 0.393984 | 7.65318  | 1.96E-14 | 2.39E-13 | 14.63633 | 10.40082 | 13.91463 | 73.66019 | 134.764  | 105.5228 |
| 9488  | ESRRB     | 8.529761 | 3.015141 | 1.009404 | 2.987051 | 0.002817 | 0.007893 | 1.084173 | 1.094824 | 3.478657 | 26.78552 | 10.69555 | 8.039836 |
| 15554 | FAM216B   | 3.035974 | 3.013834 | 1.736957 | 1.735123 | 0.082719 | 0.141384 | 0        | 0        | 2.087194 | 6.696381 | 6.417332 | 3.014938 |
| 16298 | LOC119621 | 4.153027 | 3.013489 | 1.875107 | 1.607103 | 0.108032 | 0.17622  | 0        | 0        | 2.782925 | 17.85702 | 4.278221 | 0        |
| 9414  | TMEM174   | 9.382385 | 3.013102 | 1.003007 | 3.00407  | 0.002664 | 0.007523 | 2.168345 | 0        | 4.174388 | 15.62489 | 19.252   | 15.07469 |
| 12953 | LOC103241 | 4.650804 | 3.012927 | 1.361695 | 2.21263  | 0.026923 | 0.055258 | 0        | 1.642235 | 1.391463 | 11.16063 | 10.69555 | 3.014938 |
| 15269 | LOC119621 | 2.588018 | 3.012767 | 1.687868 | 1.784954 | 0.074269 | 0.12931  | 1.084173 | 0.547412 | 0        | 4.464254 | 6.417332 | 3.014938 |
| 8159  | LOC103231 | 15.82483 | 3.011676 | 0.895928 | 3.361516 | 0.000775 | 0.002526 | 0        | 4.926706 | 5.565851 | 22.32127 | 47.06043 | 15.07469 |
| 14967 | RPH3A     | 42.88552 | 3.011541 | 1.636519 | 1.840212 | 0.065737 | 0.116765 | 0        | 2.737059 | 25.74206 | 66.96381 | 117.6511 | 44.2191  |
| 11900 | PASD1     | 5.541344 | 3.011005 | 1.241713 | 2.424879 | 0.015313 | 0.034211 | 0.542086 | 1.094824 | 2.087194 | 2.232127 | 19.252   | 8.039836 |
| 12679 | HSFX3     | 5.517087 | 3.010143 | 1.329139 | 2.264731 | 0.023529 | 0.049335 | 0        | 2.189647 | 1.391463 | 20.08914 | 6.417332 | 3.014938 |
| 13778 | AQP8      | 3.812699 | 3.009869 | 1.466998 | 2.05172  | 0.040197 | 0.077561 | 0        | 0.547412 | 2.087194 | 8.928508 | 4.278221 | 7.034856 |
| 8490  | LOC119621 | 11.51834 | 3.009647 | 0.923727 | 3.258156 | 0.001121 | 0.003511 | 1.626259 | 0.547412 | 5.565851 | 26.78552 | 23.53022 | 11.05477 |
| 7100  | CTSW      | 12.95919 | 3.009248 | 0.814213 | 3.6959   | 0.000219 | 0.00082  | 2.168345 | 1.642235 | 4.87012  | 15.62489 | 36.36488 | 17.08465 |
| 17439 | MPO       | 15.6479  | 3.009192 | 2.118989 | 1.420107 | 0.155576 | 0.237169 | 0        | 0        | 10.43597 | 22.32127 | 47.06043 | 14.06971 |
| 7759  | JPH4      | 24.80522 | 3.008327 | 0.865514 | 3.475768 | 0.000509 | 0.001745 | 0        | 2.189647 | 14.61036 | 44.64254 | 49.19955 | 38.18922 |
| 17243 | FAM71F1   | 2.00848  | 3.007593 | 2.060317 | 1.459772 | 0.144353 | 0.222561 | 0        | 0        | 1.391463 | 2.232127 | 6.417332 | 2.009959 |
| 10306 | LOC103221 | 12.56699 | 3.006723 | 1.078833 | 2.787015 | 0.00532  | 0.013721 | 0        | 2.189647 | 6.261582 | 6.696381 | 49.19955 | 11.05477 |
| 18087 | PDLIM3    | 2.061011 | 3.006679 | 2.270098 | 1.324471 | 0.185347 | 0.272415 | 0        | 0        | 1.391463 | 6.696381 | 4.278221 | 0        |
| 18088 | LOC119621 | 2.061011 | 3.006679 | 2.270098 | 1.324471 | 0.185347 | 0.272415 | 0        | 0        | 1.391463 | 6.696381 | 4.278221 | 0        |
| 15696 | LOC119621 | 3.020472 | 3.00649  | 1.750655 | 1.717351 | 0.085915 | 0.145518 | 0        | 0        | 2.087194 | 4.464254 | 8.556443 | 3.014938 |
| 5598  | ELN       | 35.9882  | 3.006434 | 0.687242 | 4.374634 | 1.22E-05 | 5.78E-05 | 1.626259 | 3.831883 | 18.78475 | 69.19594 | 81.28621 | 41.20416 |
| 8608  | LOC103231 | 14.21    | 3.005557 | 0.931596 | 3.226247 | 0.001254 | 0.003874 | 0        | 3.284471 | 6.261582 | 17.85702 | 42.78221 | 15.07469 |
| 1827  | WNT7B     | 71.56989 | 3.005147 | 0.358849 | 8.374395 | 5.55E-17 | 8.08E-16 | 12.46799 | 12.59047 | 22.95914 | 122.767  | 139.0422 | 119.5926 |
| 13878 | RGS18     | 3.849727 | 3.004043 | 1.47718  | 2.033634 | 0.041989 | 0.080434 | 0        | 0.547412 | 2.087194 | 11.16063 | 4.278221 | 5.024897 |
| 8665  | LOC119611 | 12.17476 | 3.004032 | 0.935052 | 3.212688 | 0.001315 | 0.004035 | 1.084173 | 2.189647 | 4.87012  | 8.928508 | 44.92132 | 11.05477 |
| 11906 | SLC13A5   | 5.412026 | 3.003736 | 1.239427 | 2.423488 | 0.015372 | 0.034325 | 0        | 2.189647 | 1.391463 | 11.16063 | 10.69555 | 7.034856 |
| 17395 | FEV       | 17.66932 | 3.003201 | 2.099967 | 1.430118 | 0.152683 | 0.233348 | 0        | 0        | 11.82743 | 35.71403 | 36.36488 | 22.10955 |
| 13758 | AFM       | 5.007426 | 3.001515 | 1.460065 | 2.05574  | 0.039808 | 0.076921 | 0        | 0        | 3.478657 | 6.696381 | 12.83466 | 7.034856 |
| 16053 | LOC119621 | 3.0575   | 3.001131 | 1.812805 | 1.655518 | 0.09782  | 0.161987 | 0        | 0        | 2.087194 | 6.696381 | 8.556443 | 1.004979 |
| 16054 | IZUMO2    | 3.0575   | 3.001131 | 1.812805 | 1.655518 | 0.09782  | 0.161987 | 0        | 0        | 2.087194 | 6.696381 | 8.556443 | 1.004979 |
| 16953 | LOC119621 | 1.773213 | 2.999979 | 2.001293 | 1.499021 | 0.133868 | 0.209927 | 0        | 0.547412 | 0.695731 | 2.232127 | 2.139111 | 5.024897 |
| 15786 | LOC103241 | 2.610431 | 2.999104 | 1.75978  | 1.704249 | 0.088335 | 0.148763 | 0.542086 | 1.094824 | 0        | 4.464254 | 8.556443 | 1.004979 |
| 7966  | CCDC141   | 10.89969 | 2.998075 | 0.876569 | 3.42024  | 0.000626 | 0.002088 | 2.710432 | 1.642235 | 2.782925 | 24.5534  | 25.66933 | 8.039836 |
| 18120 | LOC103231 | 2.045508 | 2.996267 | 2.274154 | 1.31753  | 0.187661 | 0.275329 | 0        | 0        | 1.391463 | 4.464254 | 6.417332 | 0        |
| 14977 | CUNH11or  | 4.053988 | 2.995833 | 1.629373 | 1.838642 | 0.065968 | 0.117097 | 0        | 0        | 2.782925 | 6.696381 | 12.83466 | 2.009959 |
| 11178 | SLC6A20   | 7.448054 | 2.994607 | 1.158028 | 2.585953 | 0.009711 | 0.023095 | 0        | 2.189647 | 2.782925 | 11.16063 | 23.53022 | 5.024897 |
| 13545 | ACTL10    | 4.920271 | 2.994447 | 1.426098 | 2.099748 | 0.035751 | 0.070169 | 0        | 0.547412 | 2.782925 | 15.62489 | 8.556443 | 2.009959 |
| 11464 | ASPG      | 5.415386 | 2.994092 | 1.186422 | 2.523632 | 0.011615 | 0.026935 | 1.626259 | 0.547412 | 1.391463 | 8.928508 | 14.97377 | 5.024897 |
| 10785 | RPGRIP1   | 10.63576 | 2.993343 | 1.119734 | 2.673263 | 0.007512 | 0.018516 | 0        | 1.642235 | 5.565851 | 8.928508 | 40.6431  | 7.034856 |
| 10132 | GRIA2     | 13.40786 | 2.992936 | 1.057275 | 2.830803 | 0.004643 | 0.01218  | 0        | 2.737059 | 6.261582 | 26.78552 | 40.6431  | 4.019918 |
| 15119 | LOC103211 | 3.409568 | 2.99266  | 1.65348  | 1.809916 | 0.070309 | 0.123629 | 0        | 2.189647 | 0        | 6.696381 | 8.556443 | 3.014938 |
| 8559  | TSSK1B    | 8.709267 | 2.991743 | 0.923683 | 3.238929 | 0.0012   | 0.003727 | 2.710432 | 1.094824 | 2.087194 | 11.16063 | 17.11289 | 18.08963 |
| 12409 | PLBD1     | 5.864229 | 2.991405 | 1.290016 | 2.318891 | 0.020401 | 0.043707 | 0        | 0.547412 | 3.478657 | 11.16063 | 14.97377 | 5.024897 |
| 8011  | LOC119621 | 12.69009 | 2.989981 | 0.877128 | 3.408831 | 0.000652 | 0.002165 | 3.252518 | 1.642235 | 3.478657 | 20.08914 | 40.6431  | 7.034856 |
| 9515  | MYBPC3    | 16.84137 | 2.989472 | 1.003084 | 2.980282 | 0.00288  | 0.008046 | 0        | 1.094824 | 10.43597 | 20.08914 | 51.33866 | 18.08963 |
| 13978 | LOC119621 | 3.855749 | 2.988769 | 1.48253  | 2.015992 | 0.043801 | 0.083306 | 0        | 0.547412 | 2.087194 | 8.928508 | 8.556443 | 3.014938 |
| 8260  | GABRE     | 11.30868 | 2.988459 | 0.898464 | 3.326188 | 0.00088  | 0.002834 | 1.084173 | 1.094824 | 5.565851 | 26.78552 | 19.252   | 14.06971 |
| 10041 | LOC119621 | 9.719091 | 2.988445 | 1.047428 | 2.853127 | 0.004329 | 0.011462 | 0.542086 | 0.547412 | 5.565851 | 20.08914 | 23.53022 | 8.039836 |
| 9478  | IL12RB1   | 10.41998 | 2.988268 | 0.999042 | 2.991134 | 0.002779 | 0.007796 | 1.626259 | 0        | 5.565851 | 17.85702 | 21.39111 | 16.07967 |
| 10591 | CCDC27    | 8.686462 | 2.988239 | 1.097052 | 2.72388  | 0.006452 | 0.016194 | 0        | 1.094824 | 4.87012  | 17.85702 | 19.252   | 9.044815 |
| 12716 | PRPH2     | 4.632473 | 2.987875 | 1.325422 | 2.254282 | 0.024178 | 0.050544 | 0        | 1.094824 | 2.087194 | 11.16063 | 6.417332 | 7.034856 |
| 18108 | LOC103231 | 1.992977 | 2.987348 | 2.263611 | 1.319727 | 0.186926 | 0.274444 | 0        | 0        | 1.391463 | 0        | 8.556443 | 2.009959 |
| 13255 | CPN1      | 4.799707 | 2.986691 | 1.384753 | 2.15684  | 0.031018 | 0.06221  | 0        | 0.547412 | 2.782925 | 4.464254 | 14.97377 | 6.029877 |
| 8723  | LOC119621 | 8.952332 | 2.986157 | 0.934397 | 3.195811 | 0.001394 | 0.00425  | 1.626259 | 1.642235 | 2.782925 | 8.928508 | 25.66933 | 13.06473 |
| 10582 | KCNJ16    | 15.06773 | 2.985836 | 1.095053 | 2.726658 | 0.006398 | 0.016073 | 0        | 0.547412 | 9.740239 | 35.71403 | 36.36488 | 8.039836 |
| 4762  | KEL       | 39.56747 | 2.985768 | 0.617318 | 4.836679 | 1.32E-06 | 7.37E-06 | 4.336691 | 4.379295 | 18.08902 | 75.89232 | 100.5382 | 34.1693  |
| 1904  | RRAD      | 62.08757 | 2.985184 | 0.364396 | 8.192151 | 2.57E-16 | 3.58E-15 | 11.38381 | 13.13788 | 17.39328 | 104.91   | 126.2075 | 99.49297 |
| 10410 | NR2E3     | 8.691597 | 2.984999 | 1.080029 | 2.763815 | 0.005713 | 0.01459  | 0.542086 | 0.547412 | 4.87012  | 15.62489 | 23.53022 | 7.034856 |
| 18221 | GPR173    | 27.82882 | 2.984345 | 2.298707 | 1.298271 | 0.194194 | 0.283335 | 0        | 0        | 18.78475 | 51.33892 | 72.72976 | 24.11951 |
| 13759 | TMPRSS9   | 5.283498 | 2.984129 | 1.45163  | 2.05571  | 0.03981  | 0.076921 | 0.542086 | 2.189647 | 0.695731 | 11.16063 | 17.11289 | 0        |
| 16105 | LRRCC5    | 46.95857 | 2.983833 | 1.8128   | 1.64598  | 0.099768 | 0.16469  | 0        | 1.094824 | 30.61218 | 78.12444 | 117.6511 | 54.26889 |
| 16876 | LOC103241 | 1.810241 | 2.982849 | 1.975077 | 1.510245 | 0.130981 | 0.206336 | 0        | 0.547412 | 0.695731 | 4.464254 | 2.139111 | 3.014938 |
| 10581 | CD300E    | 13.98771 | 2.982336 | 1.093644 | 2.769972 | 0.006392 | 0.01606  | 0        | 0.547412 | 9.044508 | 26.78552 | 38.50399 | 9.044815 |
| 15239 | PLPPR1    | 2.84287  | 2.981121 | 1.666016 |          |          |          |          |          |          |          |          |          |



|       |           |          |          |          |          |          |          |          |          |          |          |          |          |
|-------|-----------|----------|----------|----------|----------|----------|----------|----------|----------|----------|----------|----------|----------|
| 16908 | SERPINA12 | 2.989466 | 2.980249 | 1.980752 | 1.504605 | 0.132426 | 0.208217 | 0        | 0        | 2.087194 | 0        | 12.83466 | 3.014938 |
| 12727 | SLC52A3   | 4.705642 | 2.979886 | 1.323178 | 2.252067 | 0.024318 | 0.050797 | 0.542086 | 0.547412 | 2.087194 | 15.62489 | 6.417332 | 3.014938 |
| 3126  | LOC119621 | 661.7492 | 2.979793 | 0.477045 | 6.246352 | 4.20E-10 | 3.57E-09 | 149.0738 | 114.4091 | 182.9774 | 1285.705 | 1668.506 | 569.8234 |
| 12769 | LRRC38    | 4.601468 | 2.979792 | 1.326044 | 2.247129 | 0.024632 | 0.051286 | 0        | 1.094824 | 2.087194 | 6.696381 | 10.69555 | 7.034856 |
| 3394  | CIDEB     | 50.37414 | 2.976997 | 0.500425 | 5.94894  | 2.70E-09 | 2.11E-08 | 8.673382 | 20.25424 | 4.87012  | 104.91   | 62.03421 | 101.5029 |
| 16909 | TRNAM-CA  | 1.793851 | 2.976957 | 1.978648 | 1.504541 | 0.132442 | 0.208231 | 0.542086 | 0        | 0.695731 | 2.232127 | 4.278221 | 3.014938 |
| 11296 | LOC119621 | 7.650508 | 2.976486 | 1.162782 | 2.559798 | 0.10473  | 0.024649 | 4.336691 | 0        | 0.695731 | 17.85702 | 14.97377 | 8.039836 |
| 9328  | LOC119615 | 7.952127 | 2.975726 | 0.984006 | 3.024092 | 0.002494 | 0.007107 | 2.168345 | 0.547412 | 2.782925 | 11.16063 | 14.97377 | 16.07967 |
| 13597 | LOC119621 | 4.225793 | 2.975045 | 1.423354 | 2.090165 | 0.036603 | 0.071567 | 2.168345 | 0.547412 | 0        | 8.928508 | 10.69555 | 3.014938 |
| 12824 | IL16      | 4.638496 | 2.974896 | 1.331747 | 2.23383  | 0.025494 | 0.052843 | 0        | 1.094824 | 2.087194 | 8.928508 | 10.69555 | 5.024897 |
| 11977 | CWH43     | 6.578943 | 2.974635 | 1.234208 | 2.410157 | 0.015946 | 0.035394 | 0        | 1.094824 | 3.478657 | 4.464254 | 21.39111 | 9.044815 |
| 8918  | KLK6      | 12.33335 | 2.973762 | 0.94726  | 3.139332 | 0.001693 | 0.005048 | 1.084173 | 0.547412 | 6.957314 | 33.4819  | 12.83466 | 19.09461 |
| 16922 | LOC103241 | 1.794738 | 2.973125 | 1.978267 | 1.502894 | 0.132866 | 0.208737 | 0        | 0.547412 | 0.695731 | 2.232127 | 4.278221 | 3.014938 |
| 3706  | LOC103241 | 27.56647 | 2.972286 | 0.527496 | 5.634706 | 1.75E-08 | 1.26E-07 | 5.420864 | 8.211177 | 4.87012  | 51.33892 | 51.33866 | 44.2191  |
| 8701  | CSF3      | 11.18015 | 2.972092 | 0.928171 | 3.202097 | 0.001364 | 0.004169 | 1.626259 | 1.094824 | 4.87012  | 26.78552 | 25.66933 | 7.034856 |
| 15350 | LOC103231 | 2.828255 | 2.971798 | 1.678441 | 1.77057  | 0.076632 | 0.132721 | 0        | 0.547412 | 1.391463 | 4.464254 | 8.556443 | 2.009959 |
| 13916 | ADAMTS15  | 3.642007 | 2.968233 | 1.463828 | 2.02772  | 0.042589 | 0.081361 | 0        | 1.094824 | 1.391463 | 8.928508 | 6.417332 | 4.019918 |
| 6506  | DSCAML1   | 15.71239 | 2.967218 | 0.753429 | 3.938283 | 8.21E-05 | 0.000335 | 3.252518 | 4.379295 | 2.782925 | 29.01765 | 42.78221 | 12.05975 |
| 15546 | IGF2      | 29.10237 | 2.967005 | 1.708945 | 1.736162 | 0.082535 | 0.141142 | 0        | 1.094824 | 18.78475 | 51.33892 | 81.28621 | 22.10955 |
| 2996  | DCHS2     | 43.59887 | 2.966699 | 0.461935 | 6.422332 | 1.34E-10 | 1.19E-09 | 8.131296 | 6.02153  | 16.00182 | 82.5887  | 68.45154 | 80.39836 |
| 7637  | LOC103221 | 13.33545 | 2.965367 | 0.844159 | 3.512807 | 0.000443 | 0.001543 | 3.794605 | 1.642235 | 3.478657 | 24.5534  | 38.50399 | 8.039836 |
| 11517 | CFD       | 5.403965 | 2.965081 | 1.181433 | 2.509734 | 0.012082 | 0.02789  | 1.084173 | 0.547412 | 2.087194 | 6.696381 | 14.97377 | 7.034856 |
| 15668 | MAGEC3    | 2.812752 | 2.964922 | 1.72124  | 1.722549 | 0.08497  | 0.144177 | 0        | 0.547412 | 1.391463 | 2.232127 | 10.69555 | 2.009959 |
| 17232 | AGR3      | 1.847269 | 2.964075 | 2.026488 | 1.462666 | 0.143559 | 0.221478 | 0        | 0.547412 | 0.695731 | 6.696381 | 2.139111 | 1.004979 |
| 14288 | SPZ1      | 3.573974 | 2.963766 | 1.509027 | 1.964025 | 0.049527 | 0.092153 | 0        | 1.094824 | 1.391463 | 2.232127 | 10.69555 | 6.029877 |
| 9110  | PRR29     | 15.23645 | 2.962583 | 0.961735 | 3.080456 | 0.002067 | 0.006031 | 2.168345 | 0        | 8.348776 | 33.4819  | 36.36488 | 11.05477 |
| 16524 | LY86      | 2.84978  | 2.962229 | 1.88606  | 1.570591 | 0.116278 | 0.187076 | 0        | 0.547412 | 1.391463 | 4.464254 | 10.69555 | 0        |
| 10641 | PLPPR3    | 7.324403 | 2.961928 | 1.09371  | 2.708148 | 0.006766 | 0.016904 | 1.626259 | 0.547412 | 2.782925 | 17.85702 | 17.11289 | 4.019918 |
| 13770 | LOC119624 | 3.678148 | 2.961458 | 1.442672 | 2.05276  | 0.040096 | 0.077411 | 0.542086 | 0.547412 | 1.391463 | 11.16063 | 6.417332 | 2.009959 |
| 8825  | LOC103231 | 12.22812 | 2.961431 | 0.935455 | 3.165765 | 0.001547 | 0.00466  | 0.542086 | 1.642235 | 6.261582 | 33.4819  | 21.39111 | 10.04979 |
| 11834 | LOC103241 | 6.643261 | 2.96102  | 1.213093 | 2.440885 | 0.014651 | 0.032914 | 0.542086 | 0        | 4.174388 | 13.39276 | 10.69555 | 11.05477 |
| 4315  | MAFA      | 27.91606 | 2.960123 | 0.575499 | 5.143578 | 2.70E-07 | 1.66E-06 | 4.336691 | 3.831883 | 11.1317  | 49.10679 | 59.8951  | 39.1942  |
| 7584  | MATN4     | 12.42259 | 2.959812 | 0.838176 | 3.531253 | 0.000414 | 0.00145  | 0.542086 | 3.831883 | 4.174388 | 20.08914 | 27.80844 | 18.08963 |
| 9601  | LOC119620 | 9.347333 | 2.958914 | 0.999396 | 2.960701 | 0.003069 | 0.008499 | 0.542086 | 1.094824 | 4.87012  | 24.5534  | 14.97377 | 10.04979 |
| 12869 | ITI12     | 6.894918 | 2.958469 | 1.329829 | 2.224699 | 0.026101 | 0.053921 | 0        | 0        | 4.87012  | 15.62489 | 12.83466 | 8.039836 |
| 17720 | MCCD1     | 1.779236 | 2.958379 | 2.141217 | 1.381634 | 0.167084 | 0.250673 | 0        | 0.547412 | 0.695731 | 0        | 6.417332 | 3.014938 |
| 15214 | VSTM2A    | 27.68416 | 2.956361 | 1.648272 | 1.793612 | 0.072875 | 0.127342 | 0        | 1.642235 | 17.39328 | 42.41041 | 85.56443 | 19.09461 |
| 7651  | FRMD7     | 14.37216 | 2.956006 | 0.842181 | 3.509942 | 0.000448 | 0.001557 | 3.794605 | 1.094824 | 4.87012  | 26.78552 | 40.6431  | 9.044815 |
| 26751 | LOC119624 | 0.334993 | 2.955864 | 4.056412 | 0.728689 | 0.466192 | NA       | 0        | 0        | 0        | 0        | 0        | 2.009959 |
| 26824 | TRNAF-GA  | 0.334993 | 2.955864 | 4.056412 | 0.728689 | 0.466192 | NA       | 0        | 0        | 0        | 0        | 0        | 2.009959 |
| 26867 | IFNG      | 0.334993 | 2.955864 | 4.056412 | 0.728689 | 0.466192 | NA       | 0        | 0        | 0        | 0        | 0        | 2.009959 |
| 26885 | LOC103231 | 0.334993 | 2.955864 | 4.056412 | 0.728689 | 0.466192 | NA       | 0        | 0        | 0        | 0        | 0        | 2.009959 |
| 26890 | LOC119615 | 0.334993 | 2.955864 | 4.056412 | 0.728689 | 0.466192 | NA       | 0        | 0        | 0        | 0        | 0        | 2.009959 |
| 26894 | LOC119621 | 0.334993 | 2.955864 | 4.056412 | 0.728689 | 0.466192 | NA       | 0        | 0        | 0        | 0        | 0        | 2.009959 |
| 26897 | LOC103231 | 0.334993 | 2.955864 | 4.056412 | 0.728689 | 0.466192 | NA       | 0        | 0        | 0        | 0        | 0        | 2.009959 |
| 26923 | LOC103221 | 0.334993 | 2.955864 | 4.056412 | 0.728689 | 0.466192 | NA       | 0        | 0        | 0        | 0        | 0        | 2.009959 |
| 26976 | LOC119624 | 0.334993 | 2.955864 | 4.056412 | 0.728689 | 0.466192 | NA       | 0        | 0        | 0        | 0        | 0        | 2.009959 |
| 27054 | LOC103231 | 0.334993 | 2.955864 | 4.056412 | 0.728689 | 0.466192 | NA       | 0        | 0        | 0        | 0        | 0        | 2.009959 |
| 27172 | MOS       | 0.334993 | 2.955864 | 4.056412 | 0.728689 | 0.466192 | NA       | 0        | 0        | 0        | 0        | 0        | 2.009959 |
| 27187 | LOC119621 | 0.334993 | 2.955864 | 4.056412 | 0.728689 | 0.466192 | NA       | 0        | 0        | 0        | 0        | 0        | 2.009959 |
| 27240 | LOC103211 | 0.334993 | 2.955864 | 4.056412 | 0.728689 | 0.466192 | NA       | 0        | 0        | 0        | 0        | 0        | 2.009959 |
| 27319 | LOC119621 | 0.334993 | 2.955864 | 4.056412 | 0.728689 | 0.466192 | NA       | 0        | 0        | 0        | 0        | 0        | 2.009959 |
| 27410 | LOC119621 | 0.334993 | 2.955864 | 4.056412 | 0.728689 | 0.466192 | NA       | 0        | 0        | 0        | 0        | 0        | 2.009959 |
| 27478 | LOC119621 | 0.334993 | 2.955864 | 4.056412 | 0.728689 | 0.466192 | NA       | 0        | 0        | 0        | 0        | 0        | 2.009959 |
| 27530 | LOC103221 | 0.334993 | 2.955864 | 4.056412 | 0.728689 | 0.466192 | NA       | 0        | 0        | 0        | 0        | 0        | 2.009959 |
| 27580 | LOC119621 | 0.334993 | 2.955864 | 4.056412 | 0.728689 | 0.466192 | NA       | 0        | 0        | 0        | 0        | 0        | 2.009959 |
| 27676 | LOC119621 | 0.334993 | 2.955864 | 4.056412 | 0.728689 | 0.466192 | NA       | 0        | 0        | 0        | 0        | 0        | 2.009959 |
| 27711 | LOC119621 | 0.334993 | 2.955864 | 4.056412 | 0.728689 | 0.466192 | NA       | 0        | 0        | 0        | 0        | 0        | 2.009959 |
| 27731 | LOC119621 | 0.334993 | 2.955864 | 4.056412 | 0.728689 | 0.466192 | NA       | 0        | 0        | 0        | 0        | 0        | 2.009959 |
| 27747 | LOC119621 | 0.334993 | 2.955864 | 4.056412 | 0.728689 | 0.466192 | NA       | 0        | 0        | 0        | 0        | 0        | 2.009959 |
| 27782 | LOC119621 | 0.334993 | 2.955864 | 4.056412 | 0.728689 | 0.466192 | NA       | 0        | 0        | 0        | 0        | 0        | 2.009959 |
| 27847 | LOC119621 | 0.334993 | 2.955864 | 4.056412 | 0.728689 | 0.466192 | NA       | 0        | 0        | 0        | 0        | 0        | 2.009959 |
| 27915 | LOC119621 | 0.334993 | 2.955864 | 4.056412 | 0.728689 | 0.466192 | NA       | 0        | 0        | 0        | 0        | 0        | 2.009959 |
| 27974 | LOC119621 | 0.334993 | 2.955864 | 4.056412 | 0.728689 | 0.466192 | NA       | 0        | 0        | 0        | 0        | 0        | 2.009959 |
| 27998 | LOC119611 | 0.334993 | 2.955864 | 4.056412 | 0.728689 | 0.466192 | NA       | 0        | 0        | 0        | 0        | 0        | 2.009959 |
| 28021 | LOC119611 | 0.334993 | 2.955864 | 4.056412 | 0.728689 | 0.466192 | NA       | 0        | 0        | 0        | 0        | 0        | 2.009959 |
| 28057 | CIDEA     | 0.334993 | 2.955864 | 4.056412 | 0.728689 | 0.466192 | NA       | 0        | 0        | 0        | 0        | 0        | 2.009959 |
| 28158 | LOC119611 | 0.334993 | 2.955864 | 4.056412 | 0.728689 | 0.466192 | NA       | 0        | 0        | 0        | 0        | 0        | 2.009959 |
| 28250 | OTOR      | 0.334993 | 2.955864 | 4.056412 | 0.728689 | 0.466192 | NA       | 0        | 0        | 0        | 0        | 0        | 2.009959 |
| 28343 | LOC119611 | 0.334993 | 2.955864 | 4.056412 | 0.728689 | 0.466192 | NA       | 0        | 0        | 0        | 0        | 0        | 2.009959 |
| 28368 | LOC119611 | 0.334993 | 2.955864 | 4.056412 | 0.728689 | 0.466192 | NA       | 0        | 0        | 0        | 0        | 0        | 2.009959 |
| 28394 | LOC119611 | 0.334993 | 2.955864 | 4.056412 | 0.728689 | 0.466192 | NA       | 0        | 0        | 0        | 0        | 0        | 2.009959 |
| 28428 | LOC103231 | 0.334993 | 2.955864 | 4.056412 | 0.728689 | 0.466192 | NA       | 0        | 0        | 0        | 0        | 0        | 2.009959 |
| 28449 | LOC119621 | 0.334993 | 2.955864 | 4.056412 | 0.728689 | 0.466192 | NA       | 0        | 0        | 0        | 0        | 0        | 2.009959 |



|       |           |          |          |          |          |           |           |          |          |          |          |          |          |
|-------|-----------|----------|----------|----------|----------|-----------|-----------|----------|----------|----------|----------|----------|----------|
| 28503 | LOC119620 | 0.334993 | 2.955864 | 4.056412 | 0.728689 | 0.466192  | NA        | 0        | 0        | 0        | 0        | 0        | 2.009959 |
| 28595 | LOC119620 | 0.334993 | 2.955864 | 4.056412 | 0.728689 | 0.466192  | NA        | 0        | 0        | 0        | 0        | 0        | 2.009959 |
| 28761 | LOC119620 | 0.334993 | 2.955864 | 4.056412 | 0.728689 | 0.466192  | NA        | 0        | 0        | 0        | 0        | 0        | 2.009959 |
| 28767 | LOC119620 | 0.334993 | 2.955864 | 4.056412 | 0.728689 | 0.466192  | NA        | 0        | 0        | 0        | 0        | 0        | 2.009959 |
| 28786 | RTL3      | 0.334993 | 2.955864 | 4.056412 | 0.728689 | 0.466192  | NA        | 0        | 0        | 0        | 0        | 0        | 2.009959 |
| 28795 | LOC103230 | 0.334993 | 2.955864 | 4.056412 | 0.728689 | 0.466192  | NA        | 0        | 0        | 0        | 0        | 0        | 2.009959 |
| 28804 | LOC103220 | 0.334993 | 2.955864 | 4.056412 | 0.728689 | 0.466192  | NA        | 0        | 0        | 0        | 0        | 0        | 2.009959 |
| 28853 | LOC119620 | 0.334993 | 2.955864 | 4.056412 | 0.728689 | 0.466192  | NA        | 0        | 0        | 0        | 0        | 0        | 2.009959 |
| 28921 | LOC119620 | 0.334993 | 2.955864 | 4.056412 | 0.728689 | 0.466192  | NA        | 0        | 0        | 0        | 0        | 0        | 2.009959 |
| 28946 | LOC119620 | 0.334993 | 2.955864 | 4.056412 | 0.728689 | 0.466192  | NA        | 0        | 0        | 0        | 0        | 0        | 2.009959 |
| 28992 | LOC119620 | 0.334993 | 2.955864 | 4.056412 | 0.728689 | 0.466192  | NA        | 0        | 0        | 0        | 0        | 0        | 2.009959 |
| 29102 | LOC119610 | 0.334993 | 2.955864 | 4.056412 | 0.728689 | 0.466192  | NA        | 0        | 0        | 0        | 0        | 0        | 2.009959 |
| 29107 | LOC119610 | 0.334993 | 2.955864 | 4.056412 | 0.728689 | 0.466192  | NA        | 0        | 0        | 0        | 0        | 0        | 2.009959 |
| 29168 | LOC119610 | 0.334993 | 2.955864 | 4.056412 | 0.728689 | 0.466192  | NA        | 0        | 0        | 0        | 0        | 0        | 2.009959 |
| 29427 | LOC119610 | 0.334993 | 2.955864 | 4.056412 | 0.728689 | 0.466192  | NA        | 0        | 0        | 0        | 0        | 0        | 2.009959 |
| 29512 | LOC103240 | 0.334993 | 2.955864 | 4.056412 | 0.728689 | 0.466192  | NA        | 0        | 0        | 0        | 0        | 0        | 2.009959 |
| 29574 | LOC119620 | 0.334993 | 2.955864 | 4.056412 | 0.728689 | 0.466192  | NA        | 0        | 0        | 0        | 0        | 0        | 2.009959 |
| 29592 | DEFB109B  | 0.334993 | 2.955864 | 4.056412 | 0.728689 | 0.466192  | NA        | 0        | 0        | 0        | 0        | 0        | 2.009959 |
| 11911 | LOC103230 | 10.9179  | 2.955815 | 1.220234 | 2.422334 | 0.015421  | 0.03442   | 0        | 0        | 7.653045 | 17.85702 | 29.94755 | 10.04979 |
| 16778 | LDHAL6B   | 2.834278 | 2.955716 | 1.932978 | 1.5291   | 0.12624   | 0.200029  | 0        | 0.547412 | 1.391463 | 2.232127 | 12.83466 | 0        |
| 6777  | GJD3      | 12.25783 | 2.955271 | 0.772561 | 3.82529  | 0.000131  | 0.000512  | 2.710432 | 2.189647 | 3.478657 | 24.5534  | 23.53022 | 17.08465 |
| 14545 | LOC119620 | 5.994011 | 2.9539   | 1.540814 | 1.917103 | 0.055225  | 0.100939  | 0        | 0        | 4.174388 | 20.08914 | 10.69555 | 1.004979 |
| 8893  | EGR4      | 10.82086 | 2.953642 | 0.938763 | 3.146313 | 0.001653  | 0.004943  | 1.626259 | 1.642235 | 4.174388 | 8.928508 | 38.50399 | 10.04979 |
| 17163 | LOC119620 | 1.831766 | 2.952956 | 2.005268 | 1.472599 | 0.140859  | 0.218163  | 0        | 0.547412 | 0.695731 | 4.464254 | 4.278221 | 1.004979 |
| 17165 | LOC103220 | 1.831766 | 2.952956 | 2.005268 | 1.472599 | 0.140859  | 0.218163  | 0        | 0.547412 | 0.695731 | 4.464254 | 4.278221 | 1.004979 |
| 3683  | LOC103240 | 33.69807 | 2.952468 | 0.521357 | 5.663041 | 1.49E-08  | 1.07E-07  | 6.505036 | 4.926706 | 11.82743 | 80.35657 | 51.33866 | 47.23404 |
| 9900  | LOC119620 | 8.318951 | 2.952288 | 1.023397 | 2.884791 | 0.003917  | 0.010518  | 1.084173 | 0.547412 | 4.174388 | 20.08914 | 14.97377 | 9.044815 |
| 8001  | CCR1      | 10.77902 | 2.951524 | 0.865158 | 3.411543 | 0.000646  | 0.002146  | 2.168345 | 4.379295 | 0.695731 | 20.08914 | 19.252   | 18.08963 |
| 10688 | LOC103240 | 10.51797 | 2.950739 | 1.094879 | 2.695036 | 0.007038  | 0.017506  | 0        | 1.094824 | 6.261582 | 15.62489 | 32.08666 | 8.039836 |
| 12838 | SI        | 5.448791 | 2.949788 | 1.322108 | 2.231125 | 0.025673  | 0.053163  | 0        | 1.642235 | 2.087194 | 6.696381 | 19.252   | 3.014938 |
| 3261  | PRRG2     | 37.48723 | 2.948411 | 0.484384 | 6.086929 | 1.15E-09  | 9.38E-09  | 9.757555 | 8.758589 | 6.957314 | 95.98146 | 49.19955 | 54.26889 |
| 11532 | NHLRC4    | 6.436429 | 2.946153 | 1.175123 | 2.507102 | 0.012173  | 0.02806   | 0        | 1.094824 | 3.478657 | 11.16063 | 12.83466 | 10.04979 |
| 12492 | NEUROD6   | 5.638179 | 2.945952 | 1.279373 | 2.302652 | 0.021298  | 0.045327  | 0        | 0.547412 | 3.478657 | 8.928508 | 12.83466 | 8.039836 |
| 17301 | LOC103240 | 1.816264 | 2.943671 | 2.032704 | 1.448155 | 0.147574  | 0.226751  | 0        | 0.547412 | 0.695731 | 2.232127 | 6.417332 | 1.004979 |
| 17302 | LOC119610 | 1.816264 | 2.943671 | 2.032704 | 1.448155 | 0.147574  | 0.226751  | 0        | 0.547412 | 0.695731 | 2.232127 | 6.417332 | 1.004979 |
| 8885  | CYBB      | 13.18129 | 2.941458 | 0.934365 | 3.148082 | 0.001643  | 0.004917  | 0.542086 | 1.094824 | 7.653045 | 26.78552 | 29.94755 | 13.06473 |
| 13452 | CER1      | 6.795879 | 2.939923 | 1.388775 | 2.116918 | 0.034267  | 0.067721  | 0        | 0        | 4.87012  | 4.464254 | 21.39111 | 10.04979 |
| 14265 | LOC103240 | 4.876958 | 2.939104 | 1.494277 | 1.966907 | 0.049194  | 0.091674  | 0        | 0        | 3.478657 | 8.928508 | 12.83466 | 4.019918 |
| 14266 | TGM6      | 4.876958 | 2.939104 | 1.494277 | 1.966907 | 0.049194  | 0.091674  | 0        | 0        | 3.478657 | 8.928508 | 12.83466 | 4.019918 |
| 123   | ARHGAP42  | 1373.527 | 2.938941 | 0.125809 | 23.36042 | 1.08E-120 | 2.33E-118 | 313.3259 | 355.8177 | 281.0755 | 2247.752 | 2483.507 | 2559.683 |
| 7842  | C2        | 12.76843 | 2.93789  | 0.850228 | 3.455414 | 0.000549  | 0.001863  | 1.084173 | 1.642235 | 6.261582 | 29.01765 | 23.53022 | 15.07469 |
| 7348  | NAALAD2   | 15.34838 | 2.937468 | 0.812287 | 3.616295 | 0.000299  | 0.001081  | 3.252518 | 0.547412 | 6.957314 | 29.01765 | 34.22577 | 18.08963 |
| 11986 | ZNF541    | 11.83043 | 2.937416 | 1.219374 | 2.408955 | 0.015998  | 0.035486  | 0        | 0        | 8.348776 | 26.78552 | 27.80844 | 8.039836 |
| 7791  | LOC103240 | 13.40217 | 2.935479 | 0.846402 | 3.468185 | 0.000524  | 0.001788  | 2.710432 | 1.642235 | 4.87012  | 26.78552 | 36.36488 | 8.039836 |
| 8032  | TIGIT     | 12.97663 | 2.935046 | 0.862372 | 3.403457 | 0.000665  | 0.002202  | 3.252518 | 2.737059 | 2.782925 | 24.5534  | 38.50399 | 6.029877 |
| 13732 | OLR1      | 4.319434 | 2.934174 | 1.421496 | 2.064145 | 0.039004  | 0.075511  | 1.626259 | 0.547412 | 0.695731 | 15.62489 | 6.417332 | 1.004979 |
| 11598 | LOC103240 | 7.351785 | 2.933255 | 1.175645 | 2.495017 | 0.012595  | 0.028871  | 0        | 1.642235 | 3.478657 | 17.85702 | 17.11289 | 4.019918 |
| 15745 | MUC2      | 30.50634 | 2.933015 | 1.715989 | 1.709227 | 0.087409  | 0.147588  | 0        | 1.094824 | 20.17621 | 69.19594 | 68.45154 | 24.11951 |
| 12149 | ATCAY     | 9.763396 | 2.932353 | 1.234241 | 2.375836 | 0.017509  | 0.038315  | 0        | 0        | 6.957314 | 22.32127 | 19.252   | 10.04979 |
| 11391 | TC2N      | 9.592704 | 2.930295 | 1.1541   | 2.539031 | 0.011116  | 0.025943  | 0        | 0.547412 | 6.261582 | 22.32127 | 21.39111 | 7.034856 |
| 954   | LOC119620 | 144.6374 | 2.929797 | 0.261921 | 11.18579 | 4.79E-29  | 1.33E-27  | 30.35684 | 29.01283 | 42.43961 | 234.3733 | 233.1631 | 298.4789 |
| 6437  | ATP12A    | 15.70187 | 2.929339 | 0.738661 | 3.965743 | 7.32E-05  | 0.000302  | 4.336691 | 1.094824 | 5.565851 | 29.01765 | 32.08666 | 22.10955 |
| 10620 | LOC103210 | 10.2331  | 2.928543 | 1.078827 | 2.714562 | 0.006636  | 0.016613  | 1.626259 | 0        | 5.565851 | 26.78552 | 21.39111 | 6.029877 |
| 13594 | PHOX2B    | 4.700244 | 2.927744 | 1.400544 | 2.090434 | 0.036579  | 0.071534  | 0        | 0.547412 | 2.782925 | 11.16063 | 10.69555 | 3.014938 |
| 11689 | LOC119620 | 7.32078  | 2.927659 | 1.183636 | 2.473444 | 0.013382  | 0.030435  | 0        | 1.642235 | 3.478657 | 13.39276 | 21.39111 | 4.019918 |
| 8996  | LOC119620 | 11.9288  | 2.927425 | 0.938896 | 3.11773  | 0.001822  | 0.005386  | 1.626259 | 0.547412 | 6.261582 | 17.85702 | 34.22577 | 11.05477 |
| 12854 | LOC119620 | 7.770418 | 2.926787 | 1.313787 | 2.227748 | 0.025897  | 0.053561  | 0        | 0        | 5.565851 | 22.32127 | 10.69555 | 8.039836 |
| 10971 | LOC103240 | 6.71843  | 2.926163 | 1.110392 | 2.635252 | 0.008407  | 0.020373  | 2.710432 | 1.094824 | 0.695731 | 20.08914 | 10.69555 | 5.024897 |
| 6402  | GPM6B     | 13.62394 | 2.926097 | 0.735486 | 3.978454 | 6.94E-05  | 0.000288  | 3.252518 | 2.737059 | 3.478657 | 20.08914 | 32.08666 | 20.09959 |
| 7577  | TBX4      | 13.41751 | 2.925479 | 0.827871 | 3.53374  | 0.00041   | 0.001438  | 1.084173 | 2.737059 | 5.565851 | 31.24978 | 27.80844 | 12.05975 |
| 7115  | HTR1F     | 13.82122 | 2.925274 | 0.792661 | 3.690448 | 0.000224  | 0.000836  | 1.626259 | 4.379295 | 3.478657 | 35.71403 | 25.66933 | 12.05975 |
| 17739 | LOC103230 | 2.474827 | 2.92489  | 2.122511 | 1.378033 | 0.168193  | 0.252067  | 0        | 1.642235 | 0        | 8.928508 | 4.278221 | 0        |
| 4056  | LOC119620 | 31.45992 | 2.924823 | 0.549012 | 5.327427 | 9.96E-08  | 6.53E-07  | 3.252518 | 6.568942 | 12.52316 | 49.10679 | 62.03421 | 55.27387 |
| 8720  | RHOJ      | 10.10443 | 2.92464  | 0.914607 | 3.197702 | 0.001385  | 0.004223  | 3.794605 | 1.642235 | 1.391463 | 20.08914 | 25.66933 | 8.039836 |
| 18502 | PAX1      | 31.7977  | 2.924019 | 2.335578 | 1.251947 | 0.210589  | 0.30259   | 0        | 0        | 22.2634  | 62.49956 | 74.86887 | 31.15436 |
| 15212 | LOC119620 | 4.112602 | 2.923764 | 1.62956  | 1.794204 | 0.072781  | 0.127194  | 1.084173 | 1.642235 | 0        | 13.39276 | 8.556443 | 0        |
| 13185 | LOC119620 | 4.463202 | 2.923628 | 1.345564 | 2.172789 | 0.029796  | 0.060078  | 1.084173 | 0        | 2.087194 | 11.16063 | 6.417332 | 6.029877 |
| 18807 | LOC119620 | 1.563719 | 2.922198 | 2.402317 | 1.216408 | 0.223829  | 0.316383  | 1.084173 | 0        | 0        | 0        | 4.278221 | 4.019918 |
| 153   | MGST2     | 682.4327 | 2.920929 | 0.133417 | 21.89315 | 3.02E-106 | 5.25E-104 | 145.8212 | 172.4347 | 159.3225 | 1232.134 | 1182.928 | 1201.955 |
| 8777  | CUNH2orf  | 12.88119 | 2.920246 | 0.918334 | 3.17994  | 0.001473  | 0.004462  | 0.542086 | 1.094824 | 7.653045 | 20.08914 | 27.80844 | 20.09959 |
| 16072 | LOC103220 | 2.846952 | 2.919674 | 1.766643 | 1.652668 | 0.098399  | 0.162762  | 0        | 0        | 2.087194 | 6.696381 | 4.278221 | 4.019918 |
| 16073 | LOC119610 | 2.846952 | 2.919674 | 1.766643 | 1.652668 | 0.098399  | 0.162762  | 0        | 0        | 2.087194 | 6.696381 | 4.278221 | 4.019918 |
| 10292 | BSX       | 9.11269  | 2.919598 | 1.046394 | 2.790153 | 0.005268  | 0.013609  | 0        | 1.642235 | 4.87012  | 17.85702 | 19.252   | 11.05477 |
| 58    | PIK3R3    | 3584.312 | 2.919048 | 0.101902 | 28.6457  | 1.81E-180 | 8.31E-178 | 831.0184 | 900.4924 | 779.9149 | 6249.956 | 5998.066 | 6746.427 |



|       |           |          |          |          |          |           |           |          |          |           |          |          |          |
|-------|-----------|----------|----------|----------|----------|-----------|-----------|----------|----------|-----------|----------|----------|----------|
| 7649  | ACSM2B    | 36.26781 | 2.918786 | 0.831544 | 3.510081 | 0.000448  | 0.001557  | 1.084173 | 1.642235 | 22.95914  | 80.35657 | 83.42532 | 28.13943 |
| 18132 | LOC119623 | 1.564606 | 2.917495 | 2.2171   | 1.315906 | 0.188206  | 0.275946  | 0.542086 | 0.547412 | 0         | 0        | 4.278221 | 4.019918 |
| 2179  | ZNF469    | 62.7763  | 2.916671 | 0.381159 | 7.652104 | 1.98E-14  | 2.41E-13  | 13.01007 | 10.40082 | 20.87194  | 113.8385 | 124.0684 | 94.46807 |
| 16287 | LOC103240 | 4.889003 | 2.916062 | 1.812121 | 1.609198 | 0.107573  | 0.17559   | 0        | 0        | 3.478657  | 4.464254 | 21.39111 | 0        |
| 7746  | LOC103222 | 11.13867 | 2.915578 | 0.838059 | 3.478967 | 0.000503  | 0.001728  | 1.626259 | 3.284471 | 2.782925  | 24.5534  | 23.53022 | 11.05477 |
| 16679 | LOC119619 | 2.382606 | 2.915525 | 1.88672  | 1.545288 | 0.122277  | 0.194888  | 1.626259 | 0        | 0         | 2.232127 | 6.417332 | 4.019918 |
| 10552 | ANKK1     | 9.118713 | 2.914001 | 1.066064 | 2.733419 | 0.006268  | 0.01579   | 0        | 1.642235 | 4.87012   | 15.62489 | 23.53022 | 9.044815 |
| 8886  | AQP7      | 8.645516 | 2.913896 | 0.925697 | 3.147787 | 0.001645  | 0.004922  | 1.626259 | 1.094824 | 3.478657  | 15.62489 | 14.97377 | 15.07469 |
| 9746  | MRC1      | 7.736279 | 2.91369  | 0.9985   | 2.918067 | 0.003522  | 0.009608  | 1.084173 | 2.189647 | 2.087194  | 22.32127 | 10.69555 | 8.039836 |
| 6362  | FGF9      | 15.24852 | 2.913525 | 0.728677 | 3.998375 | 6.38E-05  | 0.000267  | 4.878777 | 1.642235 | 4.174388  | 22.32127 | 36.36488 | 22.10955 |
| 16255 | LOC119623 | 2.88398  | 2.913438 | 1.80312  | 1.615776 | 0.106143  | 0.173596  | 0        | 0        | 2.087194  | 8.928508 | 4.278221 | 2.009959 |
| 11056 | NINJ2     | 7.126788 | 2.912877 | 1.114473 | 2.613681 | 0.008957  | 0.021538  | 1.084173 | 1.094824 | 2.782925  | 13.39276 | 21.39111 | 3.014938 |
| 16094 | LOC119623 | 2.83145  | 2.912707 | 1.768341 | 1.647141 | 0.099529  | 0.164408  | 0        | 0        | 2.087194  | 4.464254 | 6.417332 | 4.019918 |
| 5991  | CTNNA3    | 16.74519 | 2.912185 | 0.698622 | 4.16847  | 3.07E-05  | 0.000136  | 4.878777 | 3.831883 | 2.782925  | 31.24978 | 40.6431  | 17.08465 |
| 6215  | PDZD2     | 31.75534 | 2.912096 | 0.715939 | 4.067521 | 4.75E-05  | 0.000203  | 1.084173 | 8.758589 | 12.52316  | 44.64254 | 98.39909 | 25.12449 |
| 11758 | LOC103235 | 5.251971 | 2.910299 | 1.184537 | 2.456908 | 0.014014  | 0.031685  | 1.084173 | 0.547412 | 2.087194  | 8.928508 | 12.83466 | 6.029877 |
| 11019 | LOC103235 | 6.035606 | 2.909629 | 1.1085   | 2.624835 | 0.008669  | 0.020916  | 0.542086 | 1.642235 | 2.087194  | 8.928508 | 14.97377 | 8.039836 |
| 8194  | NUTM1     | 12.60695 | 2.909434 | 0.868943 | 3.348243 | 0.000813  | 0.002639  | 1.084173 | 1.642235 | 6.261582  | 26.78552 | 27.80844 | 12.05975 |
| 12676 | LOC103236 | 5.024667 | 2.909397 | 1.284319 | 2.265322 | 0.023493  | 0.049271  | 1.626259 | 1.094824 | 0.695731  | 4.464254 | 19.252   | 3.014938 |
| 6672  | KCNJ9     | 30.21922 | 2.909188 | 0.75212  | 3.867983 | 0.00011   | 0.000437  | 1.084173 | 4.379295 | 16.00182  | 71.42806 | 66.31243 | 22.10955 |
| 370   | KLHL3     | 319.7652 | 2.908459 | 0.180301 | 16.13113 | 1.54E-58  | 1.11E-56  | 82.93921 | 77.73248 | 64.70302  | 535.7105 | 545.4732 | 612.0325 |
| 19748 | TRNAR-UC  | 1.606769 | 2.908038 | 2.742276 | 1.060447 | 0.288941  | 0.388957  | 1.084173 | 0        | 0         | 0        | 8.556443 | 0        |
| 10153 | RHBG      | 10.20104 | 2.907916 | 1.029357 | 2.824983 | 0.004728  | 0.012381  | 0.542086 | 0.547412 | 6.261582  | 24.5534  | 19.252   | 10.04979 |
| 6846  | ALK       | 18.91844 | 2.907153 | 0.765219 | 3.799112 | 0.000145  | 0.000564  | 5.96295  | 1.642235 | 5.565851  | 37.94616 | 51.33866 | 11.05477 |
| 15896 | LOC119618 | 3.724393 | 2.906965 | 1.725276 | 1.684928 | 0.092002  | 0.153868  | 0.542086 | 0        | 2.087194  | 11.16063 | 8.556443 | 0        |
| 13787 | SH2D1B    | 5.442505 | 2.904466 | 1.417738 | 2.048662 | 0.040495  | 0.078085  | 0        | 1.094824 | 2.782925  | 2.232127 | 23.53022 | 3.014938 |
| 18952 | LOC119623 | 1.63955  | 2.903692 | 2.43154  | 1.194178 | 0.232408  | 0.326012  | 0        | 1.094824 | 0         | 4.464254 | 4.278221 | 0        |
| 5738  | LOC103245 | 41.19668 | 2.903354 | 0.674248 | 4.306061 | 1.66E-05  | 7.70E-05  | 1.084173 | 8.758589 | 19.48048  | 78.12444 | 100.5382 | 39.1942  |
| 9800  | CA7       | 8.856688 | 2.903181 | 0.99942  | 2.904866 | 0.003674  | 0.009967  | 1.084173 | 1.094824 | 4.174388  | 8.928508 | 27.80844 | 10.04979 |
| 16312 | VTCN1     | 2.815947 | 2.902623 | 1.809569 | 1.604041 | 0.108705  | 0.177165  | 0        | 0        | 2.087194  | 2.232127 | 8.556443 | 4.019918 |
| 11353 | USHBP1    | 6.268045 | 2.902462 | 1.13959  | 2.546937 | 0.010867  | 0.025448  | 0.542086 | 0.547412 | 3.478657  | 11.16063 | 12.83466 | 9.044815 |
| 14355 | BTLA      | 3.415957 | 2.901912 | 1.487514 | 1.950847 | 0.051075  | 0.09459   | 0        | 1.094824 | 1.391463  | 6.696381 | 4.278221 | 7.034856 |
| 6847  | SLTRK2    | 22.51595 | 2.901173 | 0.763637 | 3.799154 | 0.000145  | 0.000564  | 0.542086 | 3.831883 | 11.82743  | 49.10679 | 40.6431  | 29.1444  |
| 15760 | RGR       | 2.632323 | 2.901045 | 1.69881  | 1.707693 | 0.087693  | 0.147908  | 0.542086 | 0        | 1.391463  | 6.696381 | 2.139111 | 5.024897 |
| 17386 | CLRN2     | 2.905506 | 2.900674 | 2.026638 | 1.431274 | 0.152352  | 0.232962  | 0        | 0        | 2.087194  | 8.928508 | 6.417332 | 0        |
| 12733 | LOC119623 | 5.46466  | 2.900296 | 1.288171 | 2.251483 | 0.024355  | 0.050847  | 0        | 0.547412 | 3.478657  | 11.16063 | 8.556443 | 9.044815 |
| 9559  | LOC103245 | 13.71347 | 2.898778 | 0.975915 | 2.970319 | 0.002975  | 0.008274  | 0        | 2.189647 | 7.653045  | 35.71403 | 25.66933 | 11.05477 |
| 18126 | LOC103225 | 1.602522 | 2.897732 | 2.201041 | 1.316528 | 0.187997  | 0.275731  | 0        | 1.094824 | 0         | 2.232127 | 4.278221 | 2.009959 |
| 19776 | LOC119623 | 1.608544 | 2.897709 | 2.741317 | 1.05705  | 0.290489  | 0.390506  | 0        | 1.094824 | 0         | 0        | 8.556443 | 0        |
| 5426  | MASP1     | 26.92411 | 2.896551 | 0.651252 | 4.447665 | 8.68E-06  | 4.25E-05  | 3.252518 | 6.02153  | 9.740239  | 60.26743 | 64.17332 | 18.08963 |
| 4013  | LOC103246 | 46.50016 | 2.895882 | 0.540136 | 5.361391 | 8.26E-08  | 5.47E-07  | 5.96295  | 7.116354 | 20.17621  | 71.42806 | 124.0684 | 50.24897 |
| 12155 | DCDC2C    | 7.329997 | 2.895429 | 1.219283 | 2.374698 | 0.017563  | 0.038414  | 0        | 1.094824 | 4.174388  | 11.16063 | 23.53022 | 4.019918 |
| 18935 | LOC119626 | 1.587019 | 2.895391 | 2.41688  | 1.197987 | 0.230922  | 0.324205  | 0        | 1.094824 | 0         | 0        | 6.417332 | 2.009959 |
| 13037 | ICOS      | 5.538716 | 2.895059 | 1.317239 | 2.197823 | 0.027962  | 0.057019  | 0        | 0.547412 | 3.478657  | 15.62489 | 8.556443 | 5.024897 |
| 6493  | CELF4     | 37.81272 | 2.894475 | 0.73402  | 3.943318 | 8.04E-05  | 0.000329  | 1.626259 | 6.568942 | 18.78475  | 78.12444 | 102.6773 | 19.09461 |
| 10053 | LOC103227 | 9.99846  | 2.894174 | 1.015335 | 2.850461 | 0.004366  | 0.011545  | 1.084173 | 0.547412 | 5.565851  | 20.08914 | 25.66933 | 7.034856 |
| 17927 | C1QC      | 16.53733 | 2.893919 | 2.134783 | 1.355603 | 0.175225  | 0.259852  | 0        | 0        | 11.82743  | 44.64254 | 25.66933 | 17.08465 |
| 3276  | IFI1      | 53.74774 | 2.893443 | 0.477128 | 6.064291 | 1.33E-09  | 1.08E-08  | 6.505036 | 8.758589 | 23.65487  | 78.12444 | 106.9555 | 98.48799 |
| 41    | LOC119623 | 44137.89 | 2.892363 | 0.091658 | 31.55608 | 1.48E-218 | 9.59E-216 | 10035.64 | 10814.67 | 10585.55  | 78691.4  | 71367.15 | 83332.9  |
| 10769 | AGXT2     | 9.084879 | 2.892056 | 1.081114 | 2.675071 | 0.007471  | 0.018444  | 0        | 1.094824 | 5.565851  | 13.39276 | 21.39111 | 13.06473 |
| 18232 | LOC119625 | 1.586132 | 2.892004 | 2.233635 | 1.294752 | 0.195406  | 0.284931  | 0.542086 | 0.547412 | 0         | 0        | 6.417332 | 2.009959 |
| 11927 | LOC119624 | 6.086196 | 2.891974 | 1.195409 | 2.419234 | 0.015553  | 0.034668  | 0        | 1.642235 | 2.782925  | 15.62489 | 6.417332 | 10.04979 |
| 6216  | LOC119615 | 15.10096 | 2.891891 | 0.710987 | 4.067432 | 4.75E-05  | 0.000203  | 2.168345 | 4.379295 | 4.174388  | 24.5534  | 34.22577 | 21.10457 |
| 36    | CTSH      | 3216.829 | 2.891189 | 0.088814 | 32.55348 | 1.87E-232 | 1.38E-229 | 748.6213 | 782.2515 | 761.8259  | 5551.3   | 5762.764 | 5694.214 |
| 10983 | PPP3R2    | 13.20664 | 2.891027 | 1.0979   | 2.633233 | 0.008458  | 0.020472  | 0        | 0.547412 | 9.044508  | 20.08914 | 38.50399 | 11.05477 |
| 2847  | LOC103247 | 43.60867 | 2.890403 | 0.436807 | 6.61712  | 3.66E-11  | 3.42E-10  | 9.757555 | 8.211177 | 13.2189   | 64.73168 | 98.93909 | 67.33362 |
| 16582 | CUNH16or  | 2.837472 | 2.890052 | 1.852259 | 1.560285 | 0.118693  | 0.190293  | 0        | 0        | 2.087194  | 2.232127 | 10.69555 | 2.009959 |
| 13092 | IRAG2     | 6.494719 | 2.888725 | 1.319919 | 2.188563 | 0.028629  | 0.058134  | 0        | 0.547412 | 4.174388  | 6.696381 | 23.53022 | 4.019918 |
| 15906 | NKAIN4    | 2.670239 | 2.887616 | 1.715644 | 1.683109 | 0.092354  | 0.154359  | 0        | 0.547412 | 1.391463  | 8.928508 | 2.139111 | 3.014938 |
| 44    | LOC103224 | 23509.52 | 2.886989 | 0.092611 | 31.17342 | 2.44E-213 | 1.48E-210 | 5457.183 | 6010.034 | 5331.389  | 40388.11 | 39562.85 | 44307.53 |
| 6500  | MX2       | 15.45999 | 2.886974 | 0.732718 | 3.940089 | 8.15E-05  | 0.000333  | 2.168345 | 3.284471 | 5.565851  | 35.71403 | 29.94755 | 16.07967 |
| 7462  | LOC103227 | 14.02559 | 2.886739 | 0.80698  | 3.577215 | 0.000347  | 0.001237  | 1.626259 | 2.189647 | 6.261582  | 26.78552 | 34.22577 | 13.06473 |
| 15599 | WDR87     | 36.04972 | 2.886735 | 1.669258 | 1.729352 | 0.083746  | 0.142726  | 0        | 2.189647 | 23.65487  | 51.33892 | 106.9555 | 32.15934 |
| 6386  | CASP5     | 18.19627 | 2.886119 | 0.724374 | 3.984294 | 6.77E-05  | 0.000282  | 1.084173 | 7.663765 | 4.174388  | 40.17829 | 29.94755 | 26.12947 |
| 55    | BMP1      | 3347.71  | 2.885322 | 0.100236 | 28.78529 | 3.28E-182 | 1.58E-179 | 791.9882 | 795.3894 | 809.1356  | 5734.334 | 5512.488 | 6442.923 |
| 4419  | PTGER1    | 54.36548 | 2.884955 | 0.56944  | 5.066305 | 4.06E-07  | 2.44E-06  | 4.878777 | 6.568942 | 27.82925  | 102.6778 | 121.9293 | 62.30873 |
| 17926 | AQP5      | 1.797933 | 2.884455 | 2.127737 | 1.355645 | 0.175212  | 0.259847  | 0        | 0        | 1.391463  | 2.232127 | 2.139111 | 5.024897 |
| 14454 | G6PC1     | 3.42198  | 2.883263 | 1.491483 | 1.933151 | 0.053218  | 0.097882  | 0        | 1.094824 | 1.391463  | 4.464254 | 8.556443 | 5.024897 |
| 13691 | ADRB3     | 4.294286 | 2.882909 | 1.392225 | 2.07072  | 0.038385  | 0.074535  | 0        | 1.642235 | 1.391463  | 11.16063 | 8.556443 | 3.014938 |
| 17323 | LOC103235 | 2.800444 | 2.882766 | 1.995507 | 1.444628 | 0.148562  | 0.227993  | 0        | 0        | 2.087194  | 0        | 10.69555 | 4.019918 |
| 6035  | PTGS1     | 15.97646 | 2.882665 | 0.694874 | 4.148473 | 3.35E-05  | 0.000147  | 2.168345 | 4.379295 | 4.87012   | 31.24978 | 32.08666 | 21.10457 |
| 73    | PAG1      | 4061.803 | 2.882042 | 0.108693 | 26.51549 | 6.43E-155 | 2.34E-152 | 980.0922 | 1072.927 | 857.141</ |          |          |          |



|       |           |          |          |          |          |           |           |          |          |          |          |          |          |
|-------|-----------|----------|----------|----------|----------|-----------|-----------|----------|----------|----------|----------|----------|----------|
| 14379 | LOC103221 | 5.862344 | 2.879407 | 1.477849 | 1.948377 | 0.05137   | 0.094977  | 0        | 2.737059 | 1.391463 | 2.232127 | 27.80844 | 1.004979 |
| 9430  | ROBO4     | 11.87448 | 2.879403 | 0.959593 | 3.000649 | 0.002694  | 0.007595  | 0        | 4.379295 | 4.174388 | 13.39276 | 34.22577 | 15.07469 |
| 13801 | CFAP100   | 4.5052   | 2.87908  | 1.406656 | 2.046755 | 0.040682  | 0.078366  | 0        | 0.547412 | 2.782925 | 13.39276 | 4.278221 | 6.029877 |
| 10119 | LOC119621 | 12.33857 | 2.878814 | 1.016175 | 2.832989 | 0.004611  | 0.012115  | 0        | 3.284471 | 5.565851 | 33.4819  | 25.66933 | 6.029877 |
| 11099 | LOC119621 | 8.167582 | 2.878517 | 1.10476  | 2.605558 | 0.009172  | 0.02197   | 0.542086 | 0.547412 | 4.87012  | 15.62489 | 21.39111 | 6.029877 |
| 13711 | IL12RB2   | 4.278783 | 2.878356 | 1.392638 | 2.066837 | 0.038749  | 0.075128  | 0        | 1.642235 | 1.391463 | 8.928508 | 10.69555 | 3.014938 |
| 6024  | LOC103231 | 34.93006 | 2.878214 | 0.692906 | 4.153829 | 3.27E-05  | 0.000144  | 3.252518 | 3.284471 | 18.78475 | 53.57105 | 100.5382 | 30.14938 |
| 17819 | OBP2B     | 14.44185 | 2.878201 | 2.094558 | 1.374133 | 0.1694    | 0.252742  | 0        | 0        | 10.43597 | 26.78552 | 36.36488 | 13.06473 |
| 2196  | CRB1      | 55.03474 | 2.877714 | 0.377807 | 7.616893 | 2.60E-14  | 3.15E-13  | 12.46799 | 13.13788 | 13.91463 | 82.5887  | 117.6511 | 90.44815 |
| 17834 | LOC103221 | 1.834961 | 2.876711 | 2.097593 | 1.371434 | 0.17024   | 0.253775  | 0        | 0        | 1.391463 | 4.464254 | 2.139111 | 3.014938 |
| 11457 | SYN2      | 6.044823 | 2.876697 | 1.139083 | 2.525449 | 0.011555  | 0.026813  | 0.542086 | 1.094824 | 2.782925 | 6.696381 | 17.11289 | 8.039836 |
| 12517 | LOC103221 | 7.416728 | 2.876633 | 1.251588 | 2.298387 | 0.02154   | 0.045749  | 0        | 0.547412 | 4.87012  | 20.08914 | 14.97377 | 4.019918 |
| 82    | CPM       | 2097.432 | 2.87645  | 0.111549 | 25.7864  | 1.26E-146 | 4.08E-144 | 469.9889 | 564.3816 | 473.7931 | 3645.063 | 3604.401 | 3826.962 |
| 18458 | OGN       | 1.850464 | 2.874351 | 2.290839 | 1.254715 | 0.209582  | 0.301844  | 0        | 0        | 1.391463 | 6.696381 | 0        | 3.014938 |
| 16124 | LOC103221 | 2.690876 | 2.873957 | 1.750909 | 1.641409 | 0.100713  | 0.166059  | 0.542086 | 0        | 1.391463 | 8.928508 | 4.278221 | 1.004979 |
| 115   | LOC119621 | 911.8081 | 2.873286 | 0.12098  | 23.75001 | 1.10E-124 | 2.54E-122 | 230.3867 | 215.1328 | 210.8066 | 1542.4   | 1696.315 | 1575.808 |
| 15286 | KLF17     | 4.746489 | 2.872752 | 1.611919 | 1.782194 | 0.074718  | 0.129938  | 0        | 0        | 3.478657 | 11.16063 | 12.83466 | 1.004979 |
| 13736 | LOC103241 | 4.299421 | 2.870211 | 1.390993 | 2.063425 | 0.039072  | 0.075621  | 0.542086 | 1.094824 | 1.391463 | 8.928508 | 12.83466 | 1.004979 |
| 14715 | UGT3A2    | 3.443505 | 2.870034 | 1.520854 | 1.88712  | 0.059144  | 0.106853  | 0        | 1.094824 | 1.391463 | 4.464254 | 10.69555 | 3.014938 |
| 11263 | LOC103211 | 7.936562 | 2.868352 | 1.117242 | 2.567352 | 0.010248  | 0.024189  | 1.626259 | 0        | 4.174388 | 13.39276 | 21.39111 | 7.034856 |
| 12916 | LCN10     | 5.315494 | 2.868106 | 1.292845 | 2.218445 | 0.026525  | 0.054595  | 0        | 1.094824 | 2.782925 | 11.16063 | 12.83466 | 4.019918 |
| 13556 | PRR30     | 6.559925 | 2.867806 | 1.366906 | 2.098027 | 0.035903  | 0.07041   | 0        | 0        | 4.87012  | 15.62489 | 12.83466 | 6.029877 |
| 13690 | CD8B      | 4.458691 | 2.867398 | 1.384624 | 2.070885 | 0.03837   | 0.074511  | 0        | 0.547412 | 2.782925 | 6.696381 | 10.69555 | 6.029877 |
| 4820  | ANKRD63   | 21.84381 | 2.867242 | 0.597327 | 4.800125 | 1.59E-06  | 8.75E-06  | 6.505036 | 4.379295 | 4.87012  | 26.78552 | 51.33866 | 37.18424 |
| 7579  | LHX9      | 18.19757 | 2.866766 | 0.811372 | 3.533234 | 0.000411  | 0.00144   | 2.168345 | 3.284471 | 7.653045 | 62.49956 | 23.53022 | 10.04979 |
| 9890  | LY6G6C    | 12.1715  | 2.866375 | 0.993087 | 2.886328 | 0.003898  | 0.010477  | 0        | 3.284471 | 5.565851 | 15.62489 | 38.50399 | 10.04979 |
| 17881 | LOC119621 | 1.819458 | 2.866201 | 2.101436 | 1.363925 | 0.172591  | 0.25659   | 0        | 0        | 1.391463 | 2.232127 | 4.278221 | 3.014938 |
| 17882 | LOC103231 | 1.819458 | 2.866201 | 2.101436 | 1.363925 | 0.172591  | 0.25659   | 0        | 0        | 1.391463 | 2.232127 | 4.278221 | 3.014938 |
| 5718  | LOC119611 | 18.65734 | 2.865904 | 0.663961 | 4.316373 | 1.59E-05  | 7.37E-05  | 3.252518 | 2.737059 | 7.653045 | 37.94616 | 34.22577 | 26.12947 |
| 11022 | LOC119621 | 9.972425 | 2.865823 | 1.091964 | 2.624466 | 0.008679  | 0.02093   | 0        | 1.094824 | 6.261582 | 15.62489 | 27.80844 | 9.044815 |
| 8926  | ITIH3     | 17.97366 | 2.86549  | 0.91316  | 3.137993 | 0.001701  | 0.005066  | 0        | 2.737059 | 10.43597 | 37.94616 | 40.6431  | 16.07967 |
| 10443 | TEX13A    | 9.641576 | 2.865372 | 1.03946  | 2.756598 | 0.005841  | 0.014869  | 0        | 1.642235 | 5.565851 | 11.16063 | 21.39111 | 18.08963 |
| 10428 | LOC103221 | 7.613511 | 2.864619 | 1.037569 | 2.760894 | 0.005764  | 0.014696  | 0.542086 | 1.642235 | 3.478657 | 6.696381 | 19.252   | 14.06971 |
| 13012 | KCNA10    | 5.299992 | 2.864287 | 1.300993 | 2.201617 | 0.027692  | 0.056574  | 0        | 1.094824 | 2.782925 | 8.928508 | 14.97377 | 4.019918 |
| 6214  | RASGEF1A  | 15.56014 | 2.864228 | 0.704156 | 4.067605 | 4.75E-05  | 0.000203  | 2.710432 | 4.926706 | 3.478657 | 26.78552 | 36.36488 | 19.09461 |
| 12206 | MANSC4    | 5.723454 | 2.864034 | 1.210619 | 2.365761 | 0.017993  | 0.039194  | 1.626259 | 1.642235 | 0.695731 | 13.39276 | 14.97377 | 2.009959 |
| 5656  | LOC119611 | 17.70731 | 2.863537 | 0.659152 | 4.344271 | 1.40E-05  | 6.57E-05  | 2.710432 | 6.568942 | 3.478657 | 31.24978 | 32.08666 | 30.14938 |
| 18063 | LOC103231 | 1.871989 | 2.863266 | 2.150397 | 1.331506 | 0.183023  | 0.269356  | 0        | 0        | 1.391463 | 6.696381 | 2.139111 | 1.004979 |
| 18064 | LOC103231 | 1.871989 | 2.863266 | 2.150397 | 1.331506 | 0.183023  | 0.269356  | 0        | 0        | 1.391463 | 6.696381 | 2.139111 | 1.004979 |
| 10888 | PLEKHG4B  | 11.8825  | 2.862535 | 1.079146 | 2.652593 | 0.007988  | 0.019503  | 0        | 0.547412 | 8.348776 | 15.62489 | 25.66933 | 21.10457 |
| 12255 | MHC-DOB   | 6.762828 | 2.862251 | 1.215283 | 2.355213 | 0.018512  | 0.040159  | 0        | 2.737059 | 2.087194 | 15.62489 | 17.11289 | 3.014938 |
| 6115  | LOC103221 | 17.23458 | 2.861453 | 0.695871 | 4.112048 | 3.92E-05  | 0.00017   | 5.96295  | 2.189647 | 4.174388 | 33.4819  | 38.50399 | 19.09461 |
| 394   | KLHL14    | 311.4988 | 2.86137  | 0.18105  | 15.80427 | 2.91E-56  | 1.96E-54  | 64.50828 | 85.94365 | 75.83472 | 553.5675 | 528.3603 | 560.7785 |
| 54    | SLC17A1   | 2191.117 | 2.860486 | 0.098266 | 29.10954 | 2.72E-186 | 1.34E-183 | 545.881  | 537.5584 | 507.8839 | 3765.598 | 3764.835 | 4024.943 |
| 6428  | LOC119621 | 27.25207 | 2.859974 | 0.720611 | 3.968818 | 7.22E-05  | 0.000299  | 1.626259 | 4.379295 | 13.91463 | 64.73168 | 57.75599 | 21.10457 |
| 143   | PLXNA2    | 1772.596 | 2.859776 | 0.127249 | 22.47391 | 7.47E-112 | 1.39E-109 | 375.1238 | 480.6276 | 433.4406 | 2970.961 | 2943.416 | 3432.005 |
| 9010  | CD22      | 16.31772 | 2.859346 | 0.918626 | 3.112633 | 0.001854  | 0.005471  | 0.542086 | 1.094824 | 10.43597 | 31.24978 | 38.50399 | 16.07967 |
| 8481  | P2RY6     | 25.69145 | 2.858982 | 0.877077 | 3.259671 | 0.001115  | 0.003496  | 0.542086 | 1.094824 | 17.39328 | 40.17829 | 57.75599 | 37.18424 |
| 11397 | LOC103211 | 6.899685 | 2.858924 | 1.126729 | 2.537366 | 0.011169  | 0.026053  | 0        | 1.642235 | 3.478657 | 13.39276 | 12.83466 | 10.04979 |
| 15600 | ANGPT2    | 3.449528 | 2.856949 | 1.652097 | 1.729286 | 0.083758  | 0.142728  | 0        | 1.094824 | 1.391463 | 2.232127 | 14.97377 | 1.004979 |
| 5648  | DGKB      | 24.8737  | 2.856627 | 0.656942 | 4.348371 | 1.37E-05  | 6.46E-05  | 7.047123 | 3.831883 | 6.957314 | 46.87467 | 68.45154 | 16.07967 |
| 11881 | LOC119621 | 5.955893 | 2.856296 | 1.175464 | 2.429931 | 0.015102  | 0.033792  | 1.626259 | 0.547412 | 2.087194 | 15.62489 | 12.83466 | 3.014938 |
| 2896  | LOC103211 | 43.29971 | 2.855368 | 0.435665 | 6.55404  | 5.60E-11  | 5.14E-10  | 11.38381 | 8.758589 | 11.1317  | 78.12444 | 94.12087 | 56.27885 |
| 5603  | B3GNT6    | 32.20561 | 2.854533 | 0.652799 | 4.372758 | 1.23E-05  | 5.82E-05  | 3.252518 | 4.379295 | 16.00182 | 58.0353  | 83.42532 | 28.13943 |
| 18014 | NXPE4     | 1.856486 | 2.853087 | 2.127901 | 1.340798 | 0.179986  | 0.265608  | 0        | 0        | 1.391463 | 4.464254 | 4.278221 | 1.004979 |
| 18015 | LOC119621 | 1.856486 | 2.853087 | 2.127901 | 1.340798 | 0.179986  | 0.265608  | 0        | 1.391463 | 4.464254 | 4.278221 | 1.004979 |          |
| 13122 | PADI6     | 9.335386 | 2.853076 | 1.306919 | 2.183055 | 0.029032  | 0.058799  | 0        | 0        | 6.957314 | 8.928508 | 32.08666 | 8.039836 |
| 18133 | LOC119621 | 15.1718  | 2.852506 | 2.167837 | 1.315831 | 0.188231  | 0.275968  | 0        | 0        | 11.1317  | 15.62489 | 49.19955 | 15.07469 |
| 881   | GMFG      | 132.1776 | 2.852375 | 0.245572 | 11.61522 | 3.45E-31  | 1.04E-29  | 34.15144 | 29.01283 | 33.39511 | 236.6055 | 226.7457 | 233.1552 |
| 8405  | CCR5      | 19.30362 | 2.851379 | 0.868823 | 3.281888 | 0.001031  | 0.003262  | 0        | 3.831883 | 10.43597 | 31.24978 | 49.19955 | 21.10457 |
| 16316 | LOC119621 | 3.285654 | 2.849224 | 1.777823 | 1.602648 | 0.109012  | 0.177623  | 1.626259 | 0        | 0.695731 | 6.696381 | 10.69555 | 0        |
| 13108 | TECTB     | 4.28109  | 2.847733 | 1.302705 | 2.186015 | 0.028814  | 0.05844   | 0.542086 | 0.547412 | 2.087194 | 8.928508 | 8.556443 | 5.024897 |
| 161   | LGR5      | 2052.62  | 2.847199 | 0.13189  | 21.58775 | 2.34E-103 | 3.87E-101 | 428.2482 | 594.4892 | 480.0546 | 3618.278 | 3428.994 | 3765.658 |
| 5771  | LOC119621 | 20.80667 | 2.846918 | 0.663976 | 4.287685 | 1.81E-05  | 8.32E-05  | 5.96295  | 5.474118 | 3.478657 | 26.78552 | 62.03421 | 21.10457 |
| 16151 | BP1FA1    | 2.440994 | 2.846292 | 1.738375 | 1.637329 | 0.101562  | 0.167174  | 0        | 1.094824 | 0.695731 | 6.696381 | 2.139111 | 4.019918 |
| 13536 | LOC103211 | 4.033148 | 2.846087 | 1.354844 | 2.100676 | 0.035669  | 0.07005   | 0.542086 | 1.642235 | 0.695731 | 4.464254 | 12.83466 | 4.019918 |
| 10083 | XG        | 7.561609 | 2.845677 | 1.001572 | 2.841209 | 0.004494  | 0.011849  | 1.626259 | 1.094824 | 2.782925 | 17.85702 | 14.97377 | 7.034856 |
| 13729 | LOC119621 | 6.060789 | 2.845245 | 1.378031 | 2.064717 | 0.03895   | 0.075423  | 0        | 1.642235 | 2.782925 | 26.78552 | 2.139111 | 3.014938 |
| 9597  | LOC119621 | 8.350379 | 2.844819 | 0.960445 | 2.961979 | 0.003057  | 0.008467  | 1.626259 | 1.642235 | 2.782925 | 15.62489 | 21.39111 | 7.034856 |
| 14605 | SPATA46   | 4.371536 | 2.843994 | 1.492767 | 1.905182 | 0.056756  | 0.103312  | 0        | 1.094824 | 2.087194 | 15.62489 | 6.417332 | 1.004979 |
| 11152 | LOC119621 | 6.51117  | 2.843759 | 1.09721  | 2.591809 | 0.009547  | 0.02276   | 0.542086 | 2.737059 | 1.391463 | 13.39276 | 14.97377 | 6.029877 |
| 13852 | GPR171    | 4.31723  | 2.       |          |          |           |           |          |          |          |          |          |          |



|       |           |          |          |          |          |           |           |          |          |          |          |          |          |
|-------|-----------|----------|----------|----------|----------|-----------|-----------|----------|----------|----------|----------|----------|----------|
| 18124 | MYOT      | 1.840984 | 2.8415   | 2.15789  | 1.316796 | 0.187907  | 0.275621  | 0        | 0        | 1.391463 | 2.232127 | 6.417332 | 1.004979 |
| 18670 | NCR2      | 1.803956 | 2.840817 | 2.305196 | 1.232354 | 0.217817  | 0.310159  | 0        | 0        | 1.391463 | 0        | 6.417332 | 3.014938 |
| 5951  | SLC1A2    | 16.35671 | 2.840079 | 0.678574 | 4.185366 | 2.85E-05  | 0.000127  | 3.794605 | 2.737059 | 5.565851 | 24.5534  | 36.36488 | 25.12449 |
| 12394 | LRRC53    | 6.22426  | 2.840073 | 1.223073 | 2.322079 | 0.020229  | 0.043389  | 0        | 3.831883 | 0.695731 | 8.928508 | 12.83466 | 11.05477 |
| 18199 | LRRN1     | 16.95983 | 2.84003  | 2.180856 | 1.302255 | 0.192829  | 0.281684  | 0        | 0        | 12.52316 | 31.24978 | 44.92132 | 13.06473 |
| 11418 | EPX       | 9.857459 | 2.837537 | 1.120546 | 2.532281 | 0.011332  | 0.026386  | 0        | 1.094824 | 6.261582 | 20.08914 | 25.66933 | 6.029877 |
| 10424 | LOC119620 | 7.062898 | 2.837075 | 1.027446 | 2.761288 | 0.005757  | 0.014683  | 1.626259 | 2.737059 | 0.695731 | 11.16063 | 17.11289 | 9.044815 |
| 9891  | SPAG17    | 9.496187 | 2.836931 | 0.982946 | 2.886151 | 0.0039    | 0.010481  | 0.542086 | 4.926706 | 1.391463 | 13.39276 | 25.66933 | 11.05477 |
| 14333 | LOC103220 | 3.781491 | 2.835963 | 1.450408 | 1.955286 | 0.050549  | 0.093759  | 1.084173 | 1.642235 | 0        | 2.232127 | 10.69555 | 7.034856 |
| 13889 | KRT23     | 4.303503 | 2.83525  | 1.394948 | 2.032512 | 0.042102  | 0.080587  | 0        | 1.094824 | 2.087194 | 8.928508 | 10.69555 | 3.014938 |
| 15938 | TDRD10    | 3.681967 | 2.835143 | 1.689551 | 1.678046 | 0.093338  | 0.155691  | 0        | 0        | 2.782925 | 4.464254 | 12.83466 | 2.009959 |
| 13432 | LOC103215 | 5.355717 | 2.834008 | 1.336287 | 2.120808 | 0.033938  | 0.067171  | 0        | 0.547412 | 3.478657 | 13.39276 | 10.69555 | 4.019918 |
| 6559  | KCNJ15    | 21.44327 | 2.833732 | 0.723587 | 3.916227 | 8.99E-05  | 0.000365  | 2.710432 | 1.642235 | 11.82743 | 31.24978 | 47.06043 | 34.1693  |
| 6497  | LOC119620 | 24.15462 | 2.833098 | 0.718839 | 3.941214 | 8.11E-05  | 0.000332  | 3.252518 | 2.189647 | 12.52316 | 49.10679 | 57.75599 | 20.09959 |
| 13274 | LOC103220 | 5.303186 | 2.832848 | 1.315822 | 2.152911 | 0.031326  | 0.062739  | 0        | 0.547412 | 3.478657 | 8.928508 | 12.83466 | 6.029877 |
| 12196 | LOC103220 | 5.924722 | 2.832217 | 1.196489 | 2.367107 | 0.017928  | 0.039079  | 0        | 1.642235 | 2.782925 | 13.39276 | 10.69555 | 7.034856 |
| 16216 | MS4A10    | 2.409989 | 2.831412 | 1.742142 | 1.625248 | 0.10411   | 0.170681  | 0        | 1.094824 | 0.695731 | 2.232127 | 6.417332 | 4.019918 |
| 18276 | LOC119620 | 19.6802  | 2.831223 | 2.197236 | 1.288538 | 0.197559  | 0.287377  | 0        | 0        | 14.61036 | 29.01765 | 51.33866 | 23.11453 |
| 5675  | ERBB4     | 19.24101 | 2.831168 | 0.652663 | 4.337873 | 1.44E-05  | 6.74E-05  | 4.336691 | 5.474118 | 4.174388 | 29.01765 | 51.33866 | 21.10457 |
| 17758 | LOC119620 | 1.604829 | 2.828561 | 2.056868 | 1.375179 | 0.169076  | 0.252436  | 0.542086 | 0        | 0.695731 | 2.232127 | 2.139111 | 4.019918 |
| 16796 | GFY       | 26.02507 | 2.828558 | 1.853043 | 1.526439 | 0.126901  | 0.20086   | 0        | 0.547412 | 18.78475 | 46.87467 | 74.86887 | 15.07469 |
| 12955 | LOC119620 | 5.172093 | 2.828361 | 1.278496 | 2.212257 | 0.026949  | 0.055302  | 0.542086 | 0.547412 | 2.782925 | 17.85702 | 4.278221 | 5.024897 |
| 13411 | ME3       | 5.287684 | 2.828204 | 1.331007 | 2.12486  | 0.033598  | 0.066603  | 0        | 0.547412 | 3.478657 | 6.696381 | 14.97377 | 6.029877 |
| 9561  | SLC39A2   | 9.180258 | 2.827876 | 0.952499 | 2.968903 | 0.002989  | 0.00831   | 1.084173 | 2.189647 | 3.478657 | 15.62489 | 25.66933 | 7.034856 |
| 16218 | SPATA3    | 3.666464 | 2.827527 | 1.740011 | 1.625005 | 0.104162  | 0.170744  | 0        | 0        | 2.782925 | 2.232127 | 14.97377 | 2.009959 |
| 9725  | CNTN5     | 7.902257 | 2.827052 | 0.966884 | 2.923878 | 0.003457  | 0.00945   | 1.084173 | 3.284471 | 1.391463 | 15.62489 | 14.97377 | 11.05477 |
| 9512  | LOC119620 | 18.79354 | 2.826161 | 0.947932 | 2.981395 | 0.002869  | 0.00802   | 0        | 1.642235 | 12.52316 | 35.71403 | 42.78221 | 20.09959 |
| 16208 | CD80      | 2.462519 | 2.825816 | 1.737762 | 1.626123 | 0.103923  | 0.170459  | 0        | 1.094824 | 0.695731 | 6.696381 | 4.278221 | 2.009959 |
| 15200 | SEPTIN12  | 4.471366 | 2.825793 | 1.573152 | 1.796262 | 0.072453  | 0.126715  | 0        | 0        | 3.478657 | 11.16063 | 2.139111 | 10.04979 |
| 11946 | CD86      | 6.891625 | 2.824661 | 1.169651 | 2.41496  | 0.015737  | 0.035021  | 1.084173 | 0        | 4.174388 | 8.928508 | 17.11289 | 10.04979 |
| 18968 | HCRTR1    | 1.825481 | 2.824135 | 2.3719   | 1.190664 | 0.233786  | 0.327636  | 0        | 0        | 1.391463 | 0        | 8.556443 | 1.004979 |
| 18969 | FOXO3     | 1.825481 | 2.824135 | 2.3719   | 1.190664 | 0.233786  | 0.327636  | 0        | 0        | 1.391463 | 0        | 8.556443 | 1.004979 |
| 16224 | SLCO1C1   | 2.445242 | 2.823728 | 1.739733 | 1.632081 | 0.104572  | 0.171354  | 1.084173 | 0        | 0.695731 | 4.464254 | 6.417332 | 2.009959 |
| 5692  | LOC119620 | 54.1108  | 2.823298 | 0.651884 | 4.330981 | 1.48E-05  | 6.93E-05  | 10.29964 | 1.642235 | 28.52499 | 82.5887  | 143.3204 | 58.28881 |
| 68    | NPL       | 2221.112 | 2.822949 | 0.104559 | 26.99863 | 1.53E-160 | 6.00E-158 | 527.45   | 587.9203 | 535.7132 | 3747.741 | 3771.252 | 4156.595 |
| 11504 | LOC103230 | 9.790055 | 2.822846 | 1.12256  | 2.51465  | 0.011915  | 0.027535  | 0        | 0.547412 | 6.957314 | 22.32127 | 12.83466 | 16.07967 |
| 13245 | PDILT     | 6.188167 | 2.822648 | 1.307747 | 2.158406 | 0.030896  | 0.062014  | 0        | 0.547412 | 4.174388 | 20.08914 | 4.278221 | 8.039836 |
| 9879  | SOST      | 9.397195 | 2.821643 | 0.977294 | 2.887199 | 0.003887  | 0.010461  | 1.084173 | 1.094824 | 4.87012  | 15.62489 | 25.66933 | 8.039836 |
| 12399 | LOC119620 | 7.019987 | 2.821584 | 1.215483 | 2.32137  | 0.020267  | 0.043455  | 0        | 1.094824 | 4.174388 | 17.85702 | 14.97377 | 4.019918 |
| 3075  | ERN2      | 42.17905 | 2.820416 | 0.447317 | 6.305182 | 2.88E-10  | 2.49E-09  | 13.01007 | 6.568942 | 11.82743 | 89.28508 | 62.03421 | 70.34856 |
| 5524  | LOC103240 | 19.92341 | 2.820288 | 0.640568 | 4.402793 | 1.07E-05  | 5.14E-05  | 4.878777 | 5.474118 | 4.174388 | 35.71403 | 49.19955 | 20.09959 |
| 12962 | GZMA      | 5.089444 | 2.81943  | 1.275049 | 2.211233 | 0.02702   | 0.055417  | 0        | 1.094824 | 2.782925 | 8.928508 | 10.69555 | 7.034856 |
| 10690 | IL2RA     | 9.361942 | 2.819406 | 1.046355 | 2.694503 | 0.007049  | 0.017531  | 0        | 2.189647 | 4.87012  | 13.39276 | 25.66933 | 10.04979 |
| 15054 | LOC103230 | 3.467338 | 2.818916 | 1.545756 | 1.823649 | 0.068205  | 0.120449  | 0.542086 | 0        | 2.087194 | 4.464254 | 10.69555 | 3.014938 |
| 13300 | SH2D2A    | 8.233412 | 2.818207 | 1.312458 | 2.147274 | 0.031772  | 0.063507  | 0        | 0        | 6.261582 | 17.85702 | 19.252   | 6.029877 |
| 10193 | LOC103220 | 9.022407 | 2.817454 | 1.000085 | 2.817213 | 0.004844  | 0.012635  | 2.710432 | 1.094824 | 2.782925 | 17.85702 | 25.66933 | 4.019918 |
| 10945 | TRIM55    | 7.292767 | 2.816655 | 1.066834 | 2.640201 | 0.008286  | 0.020126  | 1.084173 | 2.189647 | 2.087194 | 6.696381 | 25.66933 | 6.029877 |
| 6514  | SPATA19   | 21.95303 | 2.816302 | 0.715949 | 3.933662 | 8.37E-05  | 0.000341  | 3.794605 | 2.189647 | 10.43597 | 46.87467 | 51.33866 | 17.08465 |
| 14403 | AMELX     | 4.142292 | 2.815523 | 1.449129 | 1.942907 | 0.052027  | 0.096032  | 0        | 1.642235 | 1.391463 | 13.39276 | 6.417332 | 2.009959 |
| 17568 | LOC103240 | 2.136806 | 2.815331 | 2.00399  | 1.404863 | 0.160062  | 0.24219   | 0.542086 | 1.094824 | 0        | 0        | 2.139111 | 9.044815 |
| 12128 | LOC103230 | 6.317013 | 2.813963 | 1.182643 | 2.739385 | 0.017342  | 0.038013  | 0        | 3.284471 | 1.391463 | 15.62489 | 8.556443 | 9.044815 |
| 11590 | LOC103220 | 7.297902 | 2.813938 | 1.127186 | 2.496426 | 0.012545  | 0.028776  | 1.626259 | 1.642235 | 2.087194 | 4.464254 | 29.94755 | 4.019918 |
| 16439 | PRR15     | 2.431514 | 2.812125 | 1.777312 | 1.582235 | 0.113596  | 0.183706  | 0        | 1.094824 | 0.695731 | 2.232127 | 8.556443 | 2.009959 |
| 7555  | TMEM150   | 27.12915 | 2.811737 | 0.794195 | 3.540361 | 0.0004    | 0.001406  | 2.710432 | 1.094824 | 16.69755 | 60.26743 | 59.8951  | 22.10955 |
| 15469 | LOC119610 | 3.505253 | 2.811473 | 1.606763 | 1.749775 | 0.080157  | 0.137758  | 0        | 0.547412 | 2.087194 | 6.696381 | 10.69555 | 1.004979 |
| 10040 | ST14      | 9.321198 | 2.811245 | 0.985312 | 2.853151 | 0.004329  | 0.011462  | 0.542086 | 1.094824 | 5.565851 | 13.39276 | 19.252   | 16.07967 |
| 10717 | MALL      | 9.405622 | 2.811219 | 1.046085 | 2.687372 | 0.007202  | 0.017865  | 0        | 1.642235 | 5.565851 | 22.32127 | 12.83466 | 14.06971 |
| 17655 | LOC103240 | 2.673433 | 2.810282 | 2.014131 | 1.395283 | 0.162931  | 0.245342  | 0        | 0        | 2.087194 | 8.928508 | 0        | 5.024897 |
| 11563 | LOC103240 | 8.598058 | 2.810218 | 1.123027 | 2.50236  | 0.012337  | 0.028362  | 1.626259 | 0        | 4.87012  | 13.39276 | 25.66933 | 6.029877 |
| 7328  | CYP2A24   | 16.93508 | 2.810189 | 0.77541  | 3.624136 | 0.00029   | 0.001052  | 2.168345 | 1.642235 | 9.044508 | 29.01765 | 40.6431  | 19.09461 |
| 13444 | HEPACAM   | 4.883666 | 2.809385 | 1.326307 | 2.118201 | 0.034158  | 0.067546  | 0.542086 | 1.642235 | 1.391463 | 4.464254 | 19.252   | 2.009959 |
| 12709 | LOC119610 | 5.505201 | 2.808857 | 1.244789 | 2.256493 | 0.02404   | 0.050286  | 0.542086 | 2.737059 | 0.695731 | 8.928508 | 17.11289 | 3.014938 |
| 8270  | LOC103230 | 14.0511  | 2.80881  | 0.845376 | 3.322558 | 0.000892  | 0.002867  | 3.794605 | 1.094824 | 5.565851 | 42.41041 | 21.39111 | 10.04979 |
| 14014 | CYP4F12   | 4.074258 | 2.808644 | 1.396954 | 2.010549 | 0.044373  | 0.084177  | 0        | 1.642235 | 1.391463 | 6.696381 | 10.69555 | 4.019918 |
| 14290 | LOC119620 | 4.337703 | 2.808574 | 1.430359 | 1.963544 | 0.049583  | 0.092244  | 0        | 0.547412 | 2.782925 | 13.39276 | 4.278221 | 5.024897 |
| 8263  | LOC103210 | 11.62587 | 2.80841  | 0.84461  | 3.325097 | 0.000884  | 0.002844  | 2.168345 | 1.094824 | 5.565851 | 22.32127 | 23.53022 | 15.07469 |
| 7116  | LOC103210 | 14.5394  | 2.80795  | 0.760929 | 3.690163 | 0.000224  | 0.000837  | 3.794605 | 2.737059 | 4.174388 | 31.24978 | 34.22577 | 11.05477 |
| 8299  | LOC119620 | 14.22277 | 2.807739 | 0.847476 | 3.313059 | 0.000923  | 0.002956  | 1.084173 | 3.284471 | 6.261582 | 35.71403 | 29.94755 | 9.044815 |
| 11918 | AIF1      | 7.842956 | 2.807439 | 1.159853 | 2.420514 | 0.015499  | 0.034572  | 0        | 1.094824 | 4.87012  | 20.08914 | 14.97377 | 6.029877 |
| 14019 | LOC103240 | 4.268782 | 2.807051 | 1.396583 | 2.009942 | 0.044437  | 0.084269  | 0.542086 | 0        | 2.782925 | 6.696381 | 8.556443 | 7.034856 |
| 15598 | LOC119620 | 3.088303 | 2.80674  | 1.622565 | 1.729817 | 0.083663  | 0.142594  | 1.084173 | 1.094824 | 0        | 8.928508 | 6.417332 | 1.004979 |
| 19002 | LOC119610 | 28.67671 | 2.8061   | 2.3696   | 1.184208 | 0.236331  |           |          |          |          |          |          |          |



|                 |          |          |          |          |           |           |          |          |          |          |          |          |
|-----------------|----------|----------|----------|----------|-----------|-----------|----------|----------|----------|----------|----------|----------|
| 755 KRT19       | 158.1751 | 2.80532  | 0.225329 | 12.4499  | 1.40E-35  | 4.93E-34  | 42.28274 | 38.31883 | 38.26523 | 270.0874 | 271.6671 | 288.4291 |
| 9354 FAT2       | 12.92203 | 2.804361 | 0.929211 | 3.018003 | 0.002544  | 0.007232  | 0.542086 | 1.642235 | 7.653045 | 24.5534  | 32.08666 | 11.05477 |
| 1919 APOH       | 63.23879 | 2.803016 | 0.343844 | 8.151989 | 3.58E-16  | 4.96E-15  | 16.26259 | 16.42235 | 14.61036 | 120.5349 | 109.0946 | 102.5079 |
| 16983 LOC103248 | 2.452152 | 2.802868 | 1.874855 | 1.494978 | 0.13492   | 0.211195  | 0.542086 | 0.547412 | 0.695731 | 2.232127 | 10.69555 | 0        |
| 6301 DHH        | 29.92274 | 2.802566 | 0.696201 | 4.025515 | 5.69E-05  | 0.00024   | 2.710432 | 2.737059 | 17.39328 | 44.64254 | 74.86887 | 37.18424 |
| 11287 LOC103248 | 7.151306 | 2.802339 | 1.094264 | 2.560935 | 0.010439  | 0.024588  | 2.168345 | 1.642235 | 1.391463 | 11.16063 | 23.53022 | 3.014938 |
| 5331 FOXA2      | 25.42052 | 2.802161 | 0.6224   | 4.502184 | 6.73E-06  | 3.35E-05  | 2.168345 | 6.02153  | 11.1317  | 42.41041 | 55.61688 | 35.17428 |
| 16807 LOC119625 | 2.626925 | 2.801667 | 1.837984 | 1.524315 | 0.12743   | 0.201566  | 0        | 0        | 2.087194 | 2.232127 | 6.417332 | 5.024897 |
| 11596 LOC103215 | 6.758849 | 2.80156  | 1.122653 | 2.495481 | 0.012579  | 0.028838  | 0.542086 | 1.094824 | 3.478657 | 11.16063 | 19.252   | 5.024897 |
| 17841 LOC119625 | 1.642744 | 2.801553 | 2.045002 | 1.369951 | 0.170702  | 0.254364  | 0        | 0.547412 | 0.695731 | 4.464254 | 2.139111 | 2.009959 |
| 6928 LOC119615  | 14.6985  | 2.800534 | 0.744006 | 3.764128 | 0.000167  | 0.000641  | 1.626259 | 3.284471 | 6.261582 | 31.24978 | 25.66933 | 20.09959 |
| 17070 LOC103215 | 2.716484 | 2.79902  | 1.885098 | 1.484814 | 0.137593  | 0.214288  | 0        | 0        | 2.087194 | 8.928508 | 4.278221 | 1.004979 |
| 4592 LOC103215  | 36.4874  | 2.797672 | 0.565531 | 4.946981 | 7.54E-07  | 4.36E-06  | 5.96295  | 3.831883 | 18.08902 | 69.19594 | 70.59065 | 51.25395 |
| 8798 ETNPPL     | 9.542964 | 2.79565  | 0.880473 | 3.17517  | 0.001497  | 0.004525  | 2.168345 | 2.189647 | 2.782925 | 13.39276 | 25.66933 | 11.05477 |
| 3322 LOC103248  | 35.42599 | 2.794385 | 0.464014 | 6.022203 | 1.72E-09  | 1.38E-08  | 8.673382 | 6.568942 | 11.82743 | 60.26743 | 59.8951  | 65.32367 |
| 16356 APOF      | 3.344042 | 2.792762 | 1.750629 | 1.595291 | 0.110647  | 0.17984   | 0        | 1.094824 | 1.391463 | 11.16063 | 6.417332 | 0        |
| 10241 LOC103235 | 10.93804 | 2.79231  | 0.995409 | 2.805188 | 0.005029  | 0.013054  | 5.420864 | 0.547412 | 2.087194 | 29.01765 | 23.53022 | 5.024897 |
| 10756 LOC103215 | 18.79647 | 2.792081 | 1.042485 | 2.678293 | 0.0074    | 0.018291  | 0        | 0.547412 | 13.91463 | 29.01765 | 49.19955 | 20.09959 |
| 14364 LOC119625 | 4.274805 | 2.791847 | 1.432231 | 1.949299 | 0.05126   | 0.094864  | 0.542086 | 0        | 2.782925 | 4.464254 | 12.83466 | 5.024897 |
| 11091 LOC119625 | 7.529288 | 2.791119 | 1.070171 | 2.608105 | 0.009105  | 0.021823  | 0.542086 | 1.094824 | 4.174388 | 8.928508 | 21.39111 | 9.044815 |
| 17891 ASZ1      | 1.627242 | 2.790618 | 2.048815 | 1.362064 | 0.173178  | 0.25727   | 0        | 0.547412 | 0.695731 | 2.232127 | 4.278221 | 2.009959 |
| 17892 LOC103248 | 1.627242 | 2.790618 | 2.048815 | 1.362064 | 0.173178  | 0.25727   | 0        | 0.547412 | 0.695731 | 2.232127 | 4.278221 | 2.009959 |
| 17893 LOC119625 | 1.627242 | 2.790618 | 2.048815 | 1.362064 | 0.173178  | 0.25727   | 0        | 0.547412 | 0.695731 | 2.232127 | 4.278221 | 2.009959 |
| 8165 ONECUT3    | 28.89397 | 2.790458 | 0.830552 | 3.359765 | 0.00078   | 0.00254   | 0.542086 | 2.189647 | 19.48048 | 62.49956 | 53.47777 | 35.17428 |
| 252 KIF12       | 716.0432 | 2.789956 | 0.151509 | 18.41447 | 1.01E-75  | 1.06E-73  | 200.0299 | 154.9175 | 189.2389 | 1189.724 | 1159.398 | 1402.951 |
| 18624 SPACA7    | 1.679772 | 2.789923 | 2.261295 | 1.233772 | 0.217288  | 0.309867  | 0        | 0.547412 | 0.695731 | 6.696381 | 2.139111 | 0        |
| 18634 WNT3A     | 1.679772 | 2.789923 | 2.261295 | 1.233772 | 0.217288  | 0.309867  | 0        | 0.547412 | 0.695731 | 6.696381 | 2.139111 | 0        |
| 13516 LOC103248 | 5.108142 | 2.789582 | 1.325073 | 2.105229 | 0.035271  | 0.069376  | 0        | 0.547412 | 3.478657 | 11.16063 | 6.417332 | 9.044815 |
| 7853 ERICH4     | 14.9964  | 2.788783 | 0.807743 | 3.452562 | 0.000555  | 0.00188   | 1.084173 | 2.737059 | 7.653045 | 33.4819  | 29.94755 | 15.07469 |
| 16928 LOC119625 | 2.64845  | 2.788493 | 1.856062 | 1.502371 | 0.133001  | 0.208875  | 0        | 0        | 2.087194 | 2.232127 | 8.556443 | 3.014938 |
| 11413 LOC103225 | 6.596751 | 2.787423 | 1.100247 | 2.533453 | 0.011294  | 0.026307  | 1.084173 | 1.094824 | 2.782925 | 15.62489 | 14.97377 | 4.019918 |
| 12132 LOC103215 | 8.247519 | 2.787262 | 1.17165  | 2.378919 | 0.017363  | 0.038043  | 2.710432 | 3.284471 | 0        | 20.08914 | 21.39111 | 2.009959 |
| 13584 MEOX1     | 5.14517  | 2.786886 | 1.332154 | 2.092015 | 0.036437  | 0.071311  | 0        | 0.547412 | 3.478657 | 13.39276 | 6.417332 | 7.034856 |
| 9317 GJD4       | 11.10635 | 2.786024 | 0.920009 | 3.028256 | 0.00246   | 0.007018  | 1.084173 | 4.379295 | 2.782925 | 24.5534  | 27.80844 | 6.029877 |
| 12293 GLTPD2    | 6.80944  | 2.784873 | 1.187082 | 2.345982 | 0.018977  | 0.04104   | 0        | 1.094824 | 4.174388 | 17.85702 | 10.69555 | 7.034856 |
| 6382 LOC103225  | 18.6806  | 2.78394  | 0.698316 | 3.986645 | 6.70E-05  | 0.000279  | 5.420864 | 4.926706 | 3.478657 | 42.41041 | 42.78221 | 13.06473 |
| 4613 LOC103215  | 26.97608 | 2.783171 | 0.563626 | 4.937978 | 7.89E-07  | 4.55E-06  | 4.878777 | 7.116354 | 8.348776 | 51.33892 | 62.03421 | 28.13943 |
| 18562 LOC103248 | 1.663382 | 2.780805 | 2.240404 | 1.241207 | 0.214529  | 0.307255  | 0.542086 | 0        | 0.695731 | 4.464254 | 4.278221 | 0        |
| 7569 LRRC4      | 15.46789 | 2.78023  | 0.786408 | 3.535352 | 0.000407  | 0.00143   | 1.626259 | 3.831883 | 6.261582 | 37.94616 | 32.08666 | 11.05477 |
| 2346 LOC119625  | 112.0763 | 2.780027 | 0.378493 | 7.344997 | 2.06E-13  | 2.33E-12  | 20.59928 | 22.9913  | 41.74388 | 218.7484 | 258.8324 | 109.5428 |
| 3929 LOC103248  | 34.29127 | 2.779278 | 0.512527 | 5.422696 | 5.87E-08  | 3.97E-07  | 7.589209 | 6.02153  | 12.52316 | 60.26743 | 79.14709 | 40.19918 |
| 10042 SPEN1     | 8.42575  | 2.778689 | 0.974226 | 2.8522   | 0.004342  | 0.011494  | 2.168345 | 2.737059 | 1.391463 | 26.78552 | 6.417332 | 11.05477 |
| 16330 LOC119615 | 2.465714 | 2.776901 | 1.736098 | 1.599507 | 0.109708  | 0.178592  | 0        | 0.547412 | 1.391463 | 6.696381 | 2.139111 | 4.019918 |
| 12827 TCF23     | 5.652164 | 2.776536 | 1.242987 | 2.233761 | 0.025499  | 0.052845  | 0        | 1.642235 | 2.782925 | 4.464254 | 14.97377 | 10.04979 |
| 6811 LOC119625  | 18.05496 | 2.776496 | 0.728205 | 3.812793 | 0.000137  | 0.000536  | 1.626259 | 3.284471 | 9.044508 | 40.17829 | 32.08666 | 22.10955 |
| 11200 ACR       | 6.84784  | 2.776427 | 1.075145 | 2.582375 | 0.009812  | 0.023291  | 0.542086 | 3.284471 | 1.391463 | 6.696381 | 17.11289 | 12.05975 |
| 17726 LOC119625 | 2.236635 | 2.77627  | 2.011976 | 1.379872 | 0.167626  | 0.25139   | 1.626259 | 0        | 0        | 2.232127 | 8.556443 | 1.004979 |
| 13366 LOC103235 | 4.923001 | 2.776242 | 1.301156 | 2.133673 | 0.03287   | 0.065378  | 1.084173 | 0.547412 | 2.087194 | 6.696381 | 17.11289 | 2.009959 |
| 15888 LOC119615 | 3.589806 | 2.77543  | 1.645782 | 1.686389 | 0.091721  | 0.153474  | 2.710432 | 0        | 0        | 2.232127 | 8.556443 | 8.039836 |
| 8822 LOC119615  | 11.36022 | 2.77453  | 0.876213 | 3.1665   | 0.001543  | 0.004649  | 1.626259 | 1.642235 | 5.565851 | 11.16063 | 32.08666 | 16.07967 |
| 13934 RNASE13   | 5.18822  | 2.774076 | 1.369605 | 2.025457 | 0.04282   | 0.081698  | 0        | 0.547412 | 3.478657 | 13.39276 | 10.69555 | 3.014938 |
| 15281 LOC103225 | 4.318743 | 2.77391  | 1.555527 | 1.78326  | 0.074544  | 0.129687  | 0        | 0.547412 | 2.782925 | 4.464254 | 17.11289 | 1.004979 |
| 12796 HEY2      | 6.125587 | 2.771992 | 1.237252 | 2.240442 | 0.025062  | 0.052069  | 1.084173 | 2.737059 | 0.695731 | 6.696381 | 23.53022 | 2.009959 |
| 9694 HRC        | 24.36724 | 2.77155  | 0.945139 | 2.932426 | 0.003363  | 0.009223  | 0        | 2.189647 | 16.69755 | 33.4819  | 72.72976 | 21.10457 |
| 6971 CAPN14     | 17.8428  | 2.770962 | 0.739398 | 3.747592 | 0.000179  | 0.000681  | 4.336691 | 1.094824 | 8.348776 | 3.464254 | 34.22577 | 21.10457 |
| 16243 BOLL      | 2.450211 | 2.770707 | 1.712542 | 1.617891 | 0.105686  | 0.172945  | 0        | 0.547412 | 1.391463 | 4.464254 | 4.278221 | 4.019918 |
| 16245 LOC119625 | 2.450211 | 2.770707 | 1.712542 | 1.617891 | 0.105686  | 0.172945  | 0        | 0.547412 | 1.391463 | 4.464254 | 4.278221 | 4.019918 |
| 16246 ABO       | 2.450211 | 2.770707 | 1.712542 | 1.617891 | 0.105686  | 0.172945  | 0        | 0.547412 | 1.391463 | 4.464254 | 4.278221 | 4.019918 |
| 390 PTH1R       | 335.3956 | 2.770405 | 0.174882 | 15.84158 | 1.61E-56  | 1.10E-54  | 86.19173 | 81.56436 | 89.74935 | 649.549  | 513.3866 | 591.9329 |
| 18786 LOC103225 | 1.647879 | 2.769986 | 2.270776 | 1.219841 | 0.222525  | 0.314906  | 0.542086 | 0        | 0.695731 | 2.232127 | 6.417332 | 0        |
| 156 ADGRF2      | 1002.22  | 2.76757  | 0.12722  | 2.175416 | 6.31E-105 | 1.08E-102 | 279.7166 | 233.7448 | 257.4206 | 1616.06  | 1771.184 | 1855.192 |
| 9602 DCST1      | 8.802215 | 2.766657 | 0.934474 | 2.960658 | 0.00307   | 0.008499  | 1.084173 | 2.189647 | 3.478657 | 15.62489 | 21.39111 | 9.044815 |
| 501 LOC119625   | 241.4761 | 2.766007 | 0.188714 | 14.65712 | 1.21E-48  | 6.44E-47  | 61.25576 | 59.66789 | 65.39875 | 415.1756 | 402.1528 | 445.2059 |
| 16388 OTOP1     | 3.560979 | 2.765644 | 1.73913  | 1.590245 | 0.11178   | 0.181331  | 0        | 0        | 2.782925 | 11.16063 | 6.417332 | 1.004979 |
| 18800 LOC103225 | 1.648767 | 2.765619 | 2.27038  | 1.218131 | 0.223174  | 0.31559   | 0        | 0.547412 | 0.695731 | 2.232127 | 6.417332 | 0        |
| 3412 TM4SF20    | 33.22279 | 2.76525  | 0.46593  | 5.934906 | 2.94E-09  | 2.29E-08  | 9.215468 | 9.306001 | 6.957314 | 55.80317 | 57.75599 | 60.29877 |
| 3266 LOC119625  | 74.59625 | 2.764784 | 0.454993 | 6.176539 | 1.23E-09  | 1.00E-08  | 9.215468 | 16.96977 | 31.30791 | 136.1597 | 177.5462 | 76.37844 |
| 9727 TRNAL-AA   | 8.650484 | 2.764553 | 0.945738 | 2.923171 | 0.003465  | 0.00947   | 1.084173 | 2.737059 | 2.782925 | 24.5534  | 10.69555 | 10.04979 |
| 20738 LOC119625 | 0.82297  | 2.763414 | 3.030136 | 0.911977 | 0.361781  | 0.463761  | 0        | 0        | 0.695731 | 2.232127 | 0        | 2.009959 |
| 20739 LOC119625 | 0.82297  | 2.763414 | 3.030136 | 0.911977 | 0.361781  | 0.463761  | 0        | 0        | 0.695731 | 2.232127 | 0        | 2.009959 |
| 7334 CNTN2      | 14.56086 | 2.763207 | 0.763257 | 3.620283 | 0.000294  | 0.001067  | 2.168345 | 2.189647 | 6.957314 | 29.01765 | 29.94755 | 17.08465 |
| 10795 LOC103235 | 7.834424 | 2.762892 | 1.034168 | 2.671607 | 0.007549  | 0.018592  | 0.542086 | 3.284471 | 2.087194 | 20.08914 | 14.97377 | 6.029877 |
| 20815 LOC103225 | 0.79825  | 2.762889 | 3.060667 | 0.902708 | 0.366681  | 0.468348  | 0        | 0.547412 | 0        |          |          |          |



|       |           |          |          |          |          |          |          |          |          |          |          |          |          |
|-------|-----------|----------|----------|----------|----------|----------|----------|----------|----------|----------|----------|----------|----------|
| 12400 | LOC119626 | 7.250804 | 2.762067 | 1.190043 | 2.32098  | 0.020288 | 0.043496 | 0        | 2.737059 | 2.782925 | 17.85702 | 17.11289 | 3.014938 |
| 15672 | LOC119624 | 3.022576 | 2.761114 | 1.603187 | 1.722281 | 0.085019 | 0.14422  | 1.626259 | 0        | 0.695731 | 2.232127 | 8.556443 | 5.024897 |
| 3772  | NT5C1A    | 36.84337 | 2.760075 | 0.495263 | 5.572951 | 2.50E-08 | 1.77E-07 | 9.757555 | 9.306001 | 9.044508 | 51.33892 | 98.39909 | 43.21412 |
| 12896 | ITIH6     | 5.580512 | 2.759834 | 1.243496 | 2.219415 | 0.026459 | 0.054544 | 0        | 2.189647 | 2.087194 | 15.62489 | 8.556443 | 5.024897 |
| 10621 | LOC119618 | 9.092319 | 2.759353 | 1.016557 | 2.714411 | 0.006639 | 0.016619 | 1.626259 | 0.547412 | 4.87012  | 20.08914 | 21.39111 | 6.029877 |
| 21497 | P3R3URF   | 0.785942 | 2.759227 | 3.432865 | 0.803768 | 0.421531 | 0.521301 | 0        | 0        | 0.695731 | 0        | 0        | 4.019918 |
| 5665  | RGS16     | 19.36016 | 2.75765  | 0.635336 | 4.340457 | 1.42E-05 | 6.67E-05 | 4.336691 | 4.926706 | 5.565851 | 29.01765 | 49.19955 | 23.11453 |
| 16222 | MAGEB3    | 3.455917 | 2.756344 | 1.69789  | 1.623393 | 0.104505 | 0.171266 | 0        | 0        | 2.782925 | 2.232127 | 10.69555 | 5.024897 |
| 16122 | LOC103235 | 3.492945 | 2.756259 | 1.6791   | 1.64151  | 0.100692 | 0.166039 | 0        | 0        | 2.782925 | 4.464254 | 10.69555 | 3.014938 |
| 13231 | VSTM5     | 9.717877 | 2.755847 | 1.27415  | 2.162891 | 0.03055  | 0.061383 | 0        | 0        | 7.653045 | 20.08914 | 23.53022 | 7.034856 |
| 10337 | LOC103218 | 9.025174 | 2.75536  | 0.991109 | 2.780078 | 0.005435 | 0.013977 | 1.084173 | 1.094824 | 4.87012  | 13.39276 | 25.66933 | 8.039836 |
| 21474 | LOC119624 | 0.83439  | 2.755235 | 3.412642 | 0.807361 | 0.419458 | 0.519222 | 0.542086 | 0        | 0        | 4.464254 | 0        | 0        |
| 21476 | LOC119620 | 0.83439  | 2.755235 | 3.412642 | 0.807361 | 0.419458 | 0.519222 | 0.542086 | 0        | 0        | 4.464254 | 0        | 0        |
| 21477 | LOC103241 | 0.83439  | 2.755235 | 3.412642 | 0.807361 | 0.419458 | 0.519222 | 0.542086 | 0        | 0        | 4.464254 | 0        | 0        |
| 21469 | LOC119627 | 0.835278 | 2.755187 | 3.411377 | 0.807647 | 0.419294 | 0.51918  | 0        | 0.547412 | 0        | 4.464254 | 0        | 0        |
| 21470 | LOC119615 | 0.835278 | 2.755187 | 3.411377 | 0.807647 | 0.419294 | 0.51918  | 0        | 0.547412 | 0        | 4.464254 | 0        | 0        |
| 21472 | LOC119625 | 0.835278 | 2.755187 | 3.411377 | 0.807647 | 0.419294 | 0.51918  | 0        | 0.547412 | 0        | 4.464254 | 0        | 0        |
| 13494 | LOC119627 | 4.64699  | 2.754856 | 1.306599 | 2.108417 | 0.034995 | 0.068953 | 1.626259 | 0        | 2.087194 | 6.696381 | 6.417332 | 11.05477 |
| 13100 | LOC103220 | 4.958088 | 2.754413 | 1.258925 | 2.187909 | 0.028676 | 0.058195 | 0.542086 | 0.547412 | 2.782925 | 11.16063 | 10.69555 | 4.019918 |
| 196   | ADGRF4    | 636.3143 | 2.754243 | 0.134861 | 20.4229  | 1.05E-92 | 1.42E-90 | 153.9525 | 179.0037 | 160.0182 | 1080.349 | 1105.92  | 1138.642 |
| 1524  | TMEM72    | 92.92079 | 2.754034 | 0.300423 | 9.167195 | 4.85E-20 | 8.47E-19 | 23.8518  | 20.25424 | 28.52499 | 162.9453 | 139.0422 | 182.9063 |
| 21406 | LOC103241 | 0.859998 | 2.753837 | 3.376935 | 0.815484 | 0.414795 | 0.514935 | 0        | 0        | 0.695731 | 4.464254 | 0        | 0        |
| 21407 | LOC119624 | 0.859998 | 2.753837 | 3.376935 | 0.815484 | 0.414795 | 0.514935 | 0        | 0        | 0.695731 | 4.464254 | 0        | 0        |
| 21409 | ZNFB8     | 0.859998 | 2.753837 | 3.376935 | 0.815484 | 0.414795 | 0.514935 | 0        | 0        | 0.695731 | 4.464254 | 0        | 0        |
| 21410 | LOC119628 | 0.859998 | 2.753837 | 3.376935 | 0.815484 | 0.414795 | 0.514935 | 0        | 0        | 0.695731 | 4.464254 | 0        | 0        |
| 21412 | LOC103241 | 0.859998 | 2.753837 | 3.376935 | 0.815484 | 0.414795 | 0.514935 | 0        | 0        | 0.695731 | 4.464254 | 0        | 0        |
| 21413 | LOC103235 | 0.859998 | 2.753837 | 3.376935 | 0.815484 | 0.414795 | 0.514935 | 0        | 0        | 0.695731 | 4.464254 | 0        | 0        |
| 21414 | AGTR2     | 0.859998 | 2.753837 | 3.376935 | 0.815484 | 0.414795 | 0.514935 | 0        | 0        | 0.695731 | 4.464254 | 0        | 0        |
| 21415 | LOC119627 | 0.859998 | 2.753837 | 3.376935 | 0.815484 | 0.414795 | 0.514935 | 0        | 0        | 0.695731 | 4.464254 | 0        | 0        |
| 10729 | LOC103218 | 9.063089 | 2.753215 | 1.025344 | 2.685162 | 0.007249 | 0.017963 | 0.542086 | 1.642235 | 4.87012  | 15.62489 | 25.66933 | 6.029877 |
| 17470 | LOC103238 | 2.524267 | 2.752791 | 1.943914 | 1.416108 | 0.156744 | 0.238525 | 0        | 0.547412 | 1.391463 | 8.928508 | 4.278221 | 0        |
| 16430 | LOC119627 | 2.470849 | 2.751933 | 1.737228 | 1.584095 | 0.113172 | 0.183121 | 0.542086 | 0        | 1.391463 | 4.464254 | 6.417332 | 2.009959 |
| 14855 | LOC103244 | 4.105001 | 2.75166  | 1.478303 | 1.861364 | 0.062693 | 0.112197 | 0        | 1.094824 | 2.087194 | 4.464254 | 14.97377 | 2.009959 |
| 4124  | RHOV      | 35.55946 | 2.750943 | 0.521536 | 5.274689 | 1.33E-07 | 8.57E-07 | 5.420864 | 7.663765 | 14.61036 | 84.82083 | 55.61688 | 45.22408 |
| 13501 | NPPC      | 5.151418 | 2.750243 | 1.305613 | 2.106476 | 0.035163 | 0.069234 | 2.710432 | 1.094824 | 0        | 13.39276 | 10.69555 | 3.014938 |
| 5052  | LOC103227 | 30.1399  | 2.749973 | 0.59018  | 4.65955  | 3.17E-06 | 1.67E-05 | 7.047123 | 3.831883 | 12.52316 | 80.35657 | 44.92132 | 32.15934 |
| 16437 | LOC103235 | 2.471737 | 2.749193 | 1.737155 | 1.582583 | 0.113516 | 0.1836   | 0        | 0.547412 | 1.391463 | 4.464254 | 6.417332 | 2.009959 |
| 7736  | FRMD3     | 13.78294 | 2.748687 | 0.789573 | 3.481231 | 0.000499 | 0.001715 | 3.794605 | 3.831883 | 2.782925 | 29.01765 | 34.22577 | 9.044815 |
| 14841 | LOC119627 | 3.076882 | 2.747404 | 1.474427 | 1.863371 | 0.06241  | 0.111797 | 0.542086 | 1.094824 | 0.695731 | 6.696381 | 6.417332 | 3.014938 |
| 241   | CTSD      | 26961.34 | 2.74721  | 0.147035 | 18.68404 | 6.68E-78 | 7.37E-76 | 7952.407 | 5451.127 | 7568.862 | 45059.95 | 41402.49 | 54333.21 |
| 13708 | LOC119625 | 7.892396 | 2.746659 | 1.328744 | 2.067109 | 0.038724 | 0.0751   | 0        | 0        | 6.261582 | 20.08914 | 14.97377 | 6.029877 |
| 13621 | LOC119620 | 6.468057 | 2.745875 | 1.317012 | 2.084927 | 0.037076 | 0.072363 | 0        | 2.189647 | 2.782925 | 17.85702 | 14.97377 | 1.004979 |
| 7399  | SRPK3     | 14.15826 | 2.744886 | 0.762411 | 3.600273 | 0.000318 | 0.001142 | 3.794605 | 1.642235 | 5.565851 | 26.78552 | 32.08666 | 15.07469 |
| 9355  | PNMA8C    | 11.35634 | 2.744613 | 0.909582 | 3.017444 | 0.002549 | 0.007244 | 1.626259 | 1.642235 | 5.565851 | 22.32127 | 29.94755 | 7.034856 |
| 17452 | SLC5A12   | 2.508765 | 2.744084 | 1.935003 | 1.481129 | 0.156153 | 0.237871 | 0        | 0.547412 | 1.391463 | 6.696381 | 6.417332 | 0        |
| 9053  | SRMS      | 10.13946 | 2.74363  | 0.886414 | 3.095201 | 0.001967 | 0.005776 | 2.168345 | 2.189647 | 3.478657 | 31.24978 | 10.69555 | 11.05477 |
| 4878  | CACNA1I   | 40.13578 | 2.743012 | 0.577076 | 4.753296 | 2.00E-06 | 1.09E-05 | 4.878777 | 7.116354 | 19.48048 | 58.0353  | 109.0946 | 42.20914 |
| 17172 | LOC103248 | 3.418889 | 2.742997 | 1.863761 | 1.471754 | 0.141087 | 0.21844  | 0        | 0        | 2.782925 | 0        | 10.69555 | 7.034856 |
| 17200 | SLC7A4    | 3.050124 | 2.742825 | 1.868721 | 1.467755 | 0.142171 | 0.219732 | 1.626259 | 0        | 0.695731 | 0        | 14.97377 | 1.004979 |
| 12424 | LOC103225 | 6.394001 | 2.742409 | 1.183943 | 2.316336 | 0.02054  | 0.043954 | 0        | 2.189647 | 2.782925 | 13.39276 | 14.97377 | 5.024897 |
| 16689 | NKX2-5    | 2.456234 | 2.741299 | 1.77486  | 1.544516 | 0.122463 | 0.195068 | 0        | 0.547412 | 1.391463 | 2.232127 | 8.556443 | 2.009959 |
| 4167  | LOC119624 | 26.4305  | 2.740881 | 0.522379 | 5.246924 | 1.55E-07 | 9.87E-07 | 6.505036 | 7.116354 | 6.957314 | 40.17829 | 55.61688 | 42.20914 |
| 15201 | LOC119625 | 3.044989 | 2.740729 | 1.525753 | 1.796313 | 0.072445 | 0.126715 | 1.084173 | 0.547412 | 0.695731 | 2.232127 | 10.69555 | 3.014938 |
| 20837 | LOC103225 | 0.807467 | 2.740523 | 3.048003 | 0.899121 | 0.368588 | 0.47013  | 0        | 0        | 0.695731 | 0        | 2.139111 | 2.009959 |
| 20838 | LOC119624 | 0.807467 | 2.740523 | 3.048003 | 0.899121 | 0.368588 | 0.47013  | 0        | 0        | 0.695731 | 0        | 2.139111 | 2.009959 |
| 20839 | LOC103248 | 0.807467 | 2.740523 | 3.048003 | 0.899121 | 0.368588 | 0.47013  | 0        | 0        | 0.695731 | 0        | 2.139111 | 2.009959 |
| 20840 | LOC103225 | 0.807467 | 2.740523 | 3.048003 | 0.899121 | 0.368588 | 0.47013  | 0        | 0        | 0.695731 | 0        | 2.139111 | 2.009959 |
| 20841 | LOC103235 | 0.807467 | 2.740523 | 3.048003 | 0.899121 | 0.368588 | 0.47013  | 0        | 0        | 0.695731 | 0        | 2.139111 | 2.009959 |
| 20842 | LOC119620 | 0.807467 | 2.740523 | 3.048003 | 0.899121 | 0.368588 | 0.47013  | 0        | 0        | 0.695731 | 0        | 2.139111 | 2.009959 |
| 20843 | CLDN8     | 0.807467 | 2.740523 | 3.048003 | 0.899121 | 0.368588 | 0.47013  | 0        | 0        | 0.695731 | 0        | 2.139111 | 2.009959 |
| 20904 | LOC119624 | 0.782747 | 2.739815 | 3.07943  | 0.889715 | 0.373619 | 0.474955 | 0        | 0.547412 | 0        | 0        | 2.139111 | 2.009959 |
| 20907 | PANX3     | 0.782747 | 2.739815 | 3.07943  | 0.889715 | 0.373619 | 0.474955 | 0        | 0.547412 | 0        | 0        | 2.139111 | 2.009959 |
| 20908 | LOC119628 | 0.782747 | 2.739815 | 3.07943  | 0.889715 | 0.373619 | 0.474955 | 0        | 0.547412 | 0        | 0        | 2.139111 | 2.009959 |
| 20909 | LOC119618 | 0.782747 | 2.739815 | 3.07943  | 0.889715 | 0.373619 | 0.474955 | 0        | 0.547412 | 0        | 0        | 2.139111 | 2.009959 |
| 20910 | TCL1B     | 0.782747 | 2.739815 | 3.07943  | 0.889715 | 0.373619 | 0.474955 | 0        | 0.547412 | 0        | 0        | 2.139111 | 2.009959 |
| 20912 | LOC103235 | 0.782747 | 2.739815 | 3.07943  | 0.889715 | 0.373619 | 0.474955 | 0        | 0.547412 | 0        | 0        | 2.139111 | 2.009959 |
| 20914 | LOC103215 | 0.782747 | 2.739815 | 3.07943  | 0.889715 | 0.373619 | 0.474955 | 0        | 0.547412 | 0        | 0        | 2.139111 | 2.009959 |
| 1194  | CNIH2     | 117.5943 | 2.739781 | 0.269556 | 10.16404 | 2.87E-24 | 6.39E-23 | 30.35684 | 29.01283 | 32.69937 | 236.6055 | 166.8506 | 210.0407 |
| 12558 | LOC119628 | 5.598321 | 2.739262 | 1.195175 | 2.291934 | 0.021909 | 0.046383 | 0.542086 | 1.094824 | 2.782925 | 17.85702 | 4.278221 | 7.034856 |
| 214   | LOC103235 | 573.5552 | 2.737751 | 0.138891 | 19.71153 | 1.72E-86 | 2.13E-84 | 150.7    | 149.9908 | 148.8865 | 973.2074 | 941.2087 | 1077.338 |
| 16111 | NR1I3     | 3.083792 | 2.736907 | 1.665629 | 1.643167 | 0.100348 | 0.165568 | 0        | 1.642235 | 0.695731 | 4.464254 | 10.69555 | 1.004979 |
| 361   | VSIR      | 435.2412 | 2.736868 | 0.168432 | 16.24911 | 2.27E-59 | 1.67E-57 | 119.259  | 96.89189 | 125.9274 | 743.2983 | 690.9327 | 835.1379 |
| 7792  | GRM4      | 23.07436 | 2.736506 | 0.789119 | 3.467797 | 0.000525 | 0.00179  | 0.542086 | 3.831883 | 13.91463 | 49.10679 | 44.92132 | 26.12947 |
| 187   | EEPD1     | 986.9771 | 2.736147 | 0.132766 | 20.60876 | 2.29E-94 | 3.26E-92 | 272.1274 | 282.4645 | 217.0682 | 1703.113 | 1681.341 | 1765.7   |



|       |           |          |          |          |          |          |          |          |          |          |          |          |          |
|-------|-----------|----------|----------|----------|----------|----------|----------|----------|----------|----------|----------|----------|----------|
| 17573 | CUNH11or  | 2.493262 | 2.735983 | 1.948361 | 1.404249 | 0.160245 | 0.242396 | 0        | 0.547412 | 1.391463 | 4.464254 | 8.556443 | 0        |
| 17574 | GC        | 2.493262 | 2.735983 | 1.948361 | 1.404249 | 0.160245 | 0.242396 | 0        | 0.547412 | 1.391463 | 4.464254 | 8.556443 | 0        |
| 17575 | KLRF2     | 2.493262 | 2.735983 | 1.948361 | 1.404249 | 0.160245 | 0.242396 | 0        | 0.547412 | 1.391463 | 4.464254 | 8.556443 | 0        |
| 14472 | LOC119615 | 4.117676 | 2.735619 | 1.41737  | 1.930067 | 0.053599 | 0.09846  | 0        | 0.547412 | 2.782925 | 8.928508 | 6.417332 | 6.029877 |
| 17222 | LOC119615 | 3.052787 | 2.735425 | 1.868721 | 1.463795 | 0.14325  | 0.22113  | 0        | 1.642235 | 0.695731 | 0        | 14.97377 | 1.004979 |
| 8294  | RASD1     | 13.52991 | 2.735229 | 0.825206 | 3.314602 | 0.000918 | 0.002942 | 2.168345 | 2.189647 | 6.261582 | 17.85702 | 40.6431  | 12.05975 |
| 19204 | LOC119622 | 30.12902 | 2.735063 | 2.373816 | 1.15218  | 0.249247 | 0.345045 | 0        | 0        | 23.65487 | 42.41041 | 85.56443 | 29.1444  |
| 4710  | IFITM10   | 646.7748 | 2.734988 | 0.560615 | 4.87855  | 1.07E-06 | 6.03E-06 | 219.545  | 63.49977 | 224.0255 | 1180.795 | 864.2007 | 1328.583 |
| 14151 | LOC119624 | 3.852456 | 2.734965 | 1.377668 | 1.985214 | 0.047121 | 0.088524 | 1.084173 | 0.547412 | 1.391463 | 2.232127 | 12.83466 | 5.024897 |
| 17521 | LOC119618 | 2.439844 | 2.734753 | 1.937161 | 1.411732 | 0.158029 | 0.239678 | 0.542086 | 0        | 1.391463 | 0        | 10.69555 | 2.009959 |
| 13877 | ASCL1     | 7.830385 | 2.734576 | 1.344462 | 2.033955 | 0.041956 | 0.080378 | 0        | 0        | 6.261582 | 11.16063 | 23.53022 | 6.029877 |
| 7950  | LOC119625 | 16.21345 | 2.734307 | 0.798447 | 3.424533 | 0.000616 | 0.002059 | 1.626259 | 2.189647 | 9.044508 | 24.5534  | 42.78221 | 17.08465 |
| 9947  | LOC103224 | 10.11784 | 2.734172 | 0.950648 | 2.876114 | 0.004026 | 0.01076  | 3.794605 | 0.547412 | 3.478657 | 22.32127 | 23.53022 | 7.034856 |
| 14588 | FERD3L    | 4.065145 | 2.73412  | 1.432127 | 1.909132 | 0.056245 | 0.1025   | 0        | 0.547412 | 2.782925 | 4.464254 | 8.556443 | 8.039836 |
| 4756  | DMKN      | 25.92334 | 2.73145  | 0.564337 | 4.840103 | 1.30E-06 | 7.25E-06 | 5.96295  | 7.116354 | 6.957314 | 58.0353  | 51.33866 | 26.12947 |
| 15042 | PCDHB1    | 5.21294  | 2.731268 | 1.496157 | 1.825522 | 0.067922 | 0.12004  | 0        | 0        | 4.174388 | 13.39276 | 10.69555 | 3.014938 |
| 3695  | LOC103237 | 30.76057 | 2.729765 | 0.483633 | 5.644287 | 1.66E-08 | 1.19E-07 | 8.673382 | 6.568942 | 9.044508 | 55.80317 | 49.19955 | 55.27387 |
| 15117 | LOC103218 | 3.94379  | 2.729729 | 1.50779  | 1.810417 | 0.070231 | 0.12351  | 0        | 1.642235 | 1.391463 | 8.928508 | 10.69555 | 1.004979 |
| 17847 | NPBWR2    | 2.477759 | 2.72854  | 1.992734 | 1.369245 | 0.170923 | 0.254607 | 0        | 0.547412 | 1.391463 | 2.232127 | 10.69555 | 0        |
| 11934 | TMPRSS7   | 7.822018 | 2.727711 | 1.127994 | 2.418197 | 0.015598 | 0.034746 | 2.168345 | 1.094824 | 2.782925 | 8.928508 | 29.94755 | 2.009959 |
| 19075 | GPR26     | 18.51934 | 2.727677 | 2.324142 | 1.173627 | 0.240544 | 0.335249 | 0        | 0        | 14.61036 | 42.41041 | 47.06043 | 7.034856 |
| 3346  | LOC103235 | 37.1696  | 2.727038 | 0.454634 | 5.998312 | 1.99E-09 | 1.58E-08 | 8.131296 | 12.59047 | 8.348776 | 75.89232 | 57.75599 | 60.29877 |
| 7879  | HOXD12    | 17.86541 | 2.726843 | 0.79117  | 3.446595 | 0.000568 | 0.001915 | 1.626259 | 2.189647 | 10.43597 | 26.78552 | 47.06043 | 19.09461 |
| 1484  | DDC       | 106.6233 | 2.726544 | 0.293427 | 9.292072 | 1.51E-20 | 2.71E-19 | 27.6464  | 21.34906 | 35.4823  | 160.7131 | 209.6328 | 184.9162 |
| 10654 | LOC103215 | 7.592872 | 2.726303 | 1.008802 | 2.702516 | 0.006882 | 0.017172 | 0.542086 | 3.284471 | 2.087194 | 15.62489 | 14.97377 | 9.044815 |
| 5108  | RARB      | 35.84464 | 2.726107 | 0.589519 | 4.62429  | 3.76E-06 | 1.96E-05 | 14.09425 | 9.306001 | 4.174388 | 73.66019 | 87.70354 | 26.12947 |
| 6551  | LOC103227 | 15.00627 | 2.725077 | 0.695286 | 3.91936  | 8.88E-05 | 0.00036  | 3.252518 | 3.831883 | 4.87012  | 17.85702 | 32.08666 | 28.13943 |
| 13492 | CDH4      | 7.659694 | 2.724413 | 1.292179 | 2.108387 | 0.034998 | 0.068953 | 0        | 0.547412 | 5.565851 | 11.16063 | 25.66933 | 3.014938 |
| 859   | LOC119618 | 156.5352 | 2.723954 | 0.232133 | 11.73444 | 8.49E-32 | 2.63E-30 | 47.7036  | 37.224   | 38.26523 | 285.7123 | 260.9715 | 269.3345 |
| 16766 | FAM184B   | 3.336869 | 2.722981 | 1.779171 | 1.530478 | 0.125899 | 0.199609 | 0.542086 | 0        | 2.087194 | 6.696381 | 10.69555 | 0        |
| 7444  | LOC119627 | 12.89303 | 2.722491 | 0.759658 | 3.583837 | 0.000339 | 0.001209 | 1.626259 | 4.379295 | 4.174388 | 24.5534  | 23.53022 | 19.09461 |
| 10223 | CUNH1orf  | 7.79253  | 2.72243  | 0.969217 | 2.808898 | 0.004971 | 0.012927 | 1.626259 | 1.094824 | 3.478657 | 13.39276 | 17.11289 | 10.04979 |
| 16400 | LOC119615 | 3.782579 | 2.722237 | 1.713852 | 1.588374 | 0.112202 | 0.181883 | 0        | 2.189647 | 0.695731 | 13.39276 | 6.417332 | 0        |
| 7738  | SEMA3G    | 23.89618 | 2.722099 | 0.781937 | 3.481227 | 0.000499 | 0.001715 | 1.084173 | 2.737059 | 15.30609 | 44.64254 | 53.47777 | 26.12947 |
| 14099 | LOC103218 | 5.34781  | 2.721795 | 1.364593 | 1.994583 | 0.046088 | 0.086904 | 0        | 2.737059 | 1.391463 | 6.696381 | 19.252   | 2.009959 |
| 12652 | AIPL1     | 9.373667 | 2.721297 | 1.198604 | 2.270388 | 0.023184 | 0.048715 | 0        | 0.547412 | 6.957314 | 22.32127 | 21.39111 | 5.024897 |
| 12013 | PON3      | 7.39552  | 2.72024  | 1.131465 | 2.404176 | 0.016209 | 0.035871 | 0        | 4.379295 | 1.391463 | 17.85702 | 10.69555 | 10.04979 |
| 8440  | PNMT      | 13.44144 | 2.720225 | 0.83144  | 3.271705 | 0.001069 | 0.003367 | 1.626259 | 2.189647 | 6.957314 | 37.94616 | 12.83466 | 19.09461 |
| 2459  | COL22A1   | 66.90887 | 2.719977 | 0.378673 | 7.182915 | 6.82E-13 | 7.38E-12 | 13.01007 | 18.06459 | 21.56767 | 127.2312 | 141.1813 | 80.39836 |
| 7920  | GPR55     | 38.38533 | 2.719775 | 0.792254 | 3.432959 | 0.000597 | 0.002004 | 0.542086 | 4.379295 | 25.74206 | 58.0353  | 98.39909 | 43.21412 |
| 19059 | LOC119627 | 1.448753 | 2.719752 | 2.312918 | 1.175897 | 0.239636 | 0.334264 | 1.084173 | 0        | 0        | 4.464254 | 2.139111 | 1.004979 |
| 3853  | LOC103215 | 29.8461  | 2.719091 | 0.494745 | 5.49595  | 3.89E-08 | 2.68E-07 | 9.215468 | 6.568942 | 7.653045 | 55.80317 | 55.61688 | 44.2191  |
| 12446 | LOC119625 | 9.21068  | 2.718571 | 1.176154 | 2.311408 | 0.02081  | 0.044449 | 1.084173 | 0        | 6.261582 | 26.78552 | 17.11289 | 4.019918 |
| 19570 | LOC103235 | 1.397997 | 2.71785  | 2.496759 | 1.088551 | 0.276352 | 0.375412 | 0        | 1.094824 | 0        | 0        | 4.278221 | 3.014938 |
| 11368 | LOC119627 | 7.151244 | 2.717722 | 1.067984 | 2.544723 | 0.109936 | 0.025576 | 0.542086 | 1.094824 | 4.174388 | 8.928508 | 17.11289 | 11.05477 |
| 16561 | HOPX      | 4.32796  | 2.717718 | 1.737998 | 1.563705 | 0.117887 | 0.189251 | 0        | 0        | 3.478657 | 2.232127 | 19.252   | 1.004979 |
| 13372 | LOC103235 | 6.585955 | 2.717459 | 1.274752 | 2.131755 | 0.033027 | 0.065661 | 0        | 1.094824 | 4.174388 | 6.696381 | 23.53022 | 4.019918 |
| 9309  | BCL6B     | 9.279199 | 2.717368 | 0.896481 | 3.03115  | 0.002436 | 0.006959 | 2.168345 | 1.642235 | 3.478657 | 20.08914 | 19.252   | 9.044815 |
| 16596 | CLIC2     | 3.248198 | 2.71617  | 1.743304 | 1.558058 | 0.119219 | 0.190977 | 0        | 0.547412 | 2.087194 | 0        | 12.83466 | 4.019918 |
| 21013 | LOC119627 | 0.818887 | 2.715922 | 3.093766 | 0.877869 | 0.380015 | 0.48076  | 0.542086 | 0        | 0        | 2.232127 | 2.139111 | 0        |
| 21014 | LOC119625 | 0.818887 | 2.715922 | 3.093766 | 0.877869 | 0.380015 | 0.48076  | 0.542086 | 0        | 0        | 2.232127 | 2.139111 | 0        |
| 20997 | LOC119618 | 0.819775 | 2.715868 | 3.0927   | 0.878154 | 0.37986  | 0.480632 | 0        | 0.547412 | 0        | 2.232127 | 2.139111 | 0        |
| 20999 | LINC02868 | 0.819775 | 2.715868 | 3.0927   | 0.878154 | 0.37986  | 0.480632 | 0        | 0.547412 | 0        | 2.232127 | 2.139111 | 0        |
| 21000 | LOC119625 | 0.819775 | 2.715868 | 3.0927   | 0.878154 | 0.37986  | 0.480632 | 0        | 0.547412 | 0        | 2.232127 | 2.139111 | 0        |
| 21001 | PLSCR5    | 0.819775 | 2.715868 | 3.0927   | 0.878154 | 0.37986  | 0.480632 | 0        | 0.547412 | 0        | 2.232127 | 2.139111 | 0        |
| 21002 | LOC119628 | 0.819775 | 2.715868 | 3.0927   | 0.878154 | 0.37986  | 0.480632 | 0        | 0.547412 | 0        | 2.232127 | 2.139111 | 0        |
| 21004 | LOC103230 | 0.819775 | 2.715868 | 3.0927   | 0.878154 | 0.37986  | 0.480632 | 0        | 0.547412 | 0        | 2.232127 | 2.139111 | 0        |
| 21005 | LOC103247 | 0.819775 | 2.715868 | 3.0927   | 0.878154 | 0.37986  | 0.480632 | 0        | 0.547412 | 0        | 2.232127 | 2.139111 | 0        |
| 21009 | KRTAP19-5 | 0.819775 | 2.715868 | 3.0927   | 0.878154 | 0.37986  | 0.480632 | 0        | 0.547412 | 0        | 2.232127 | 2.139111 | 0        |
| 21010 | LOC103234 | 0.819775 | 2.715868 | 3.0927   | 0.878154 | 0.37986  | 0.480632 | 0        | 0.547412 | 0        | 2.232127 | 2.139111 | 0        |
| 2907  | LOC103248 | 43.32542 | 2.715684 | 0.415387 | 6.537723 | 6.25E-11 | 5.71E-10 | 11.9259  | 9.306001 | 13.2189  | 84.82083 | 66.31243 | 74.36848 |
| 18649 | IRX1      | 16.61378 | 2.715496 | 2.201707 | 1.23336  | 0.217442 | 0.309973 | 0        | 0        | 13.2189  | 40.17829 | 34.22577 | 12.05975 |
| 244   | IFIT3     | 490.7448 | 2.714377 | 0.145412 | 18.66674 | 9.23E-78 | 1.01E-75 | 130.1007 | 135.7581 | 123.1445 | 897.315  | 797.8883 | 860.2624 |
| 20928 | LOC119628 | 0.844495 | 2.714371 | 3.063689 | 0.885981 | 0.375628 | 0.47673  | 0        | 0        | 0.695731 | 2.232127 | 2.139111 | 0        |
| 20931 | LOC119624 | 0.844495 | 2.714371 | 3.063689 | 0.885981 | 0.375628 | 0.47673  | 0        | 0        | 0.695731 | 2.232127 | 2.139111 | 0        |
| 20932 | RETNLB    | 0.844495 | 2.714371 | 3.063689 | 0.885981 | 0.375628 | 0.47673  | 0        | 0        | 0.695731 | 2.232127 | 2.139111 | 0        |
| 20933 | CUNH3orf  | 0.844495 | 2.714371 | 3.063689 | 0.885981 | 0.375628 | 0.47673  | 0        | 0        | 0.695731 | 2.232127 | 2.139111 | 0        |
| 20935 | LOC119625 | 0.844495 | 2.714371 | 3.063689 | 0.885981 | 0.375628 | 0.47673  | 0        | 0        | 0.695731 | 2.232127 | 2.139111 | 0        |
| 20936 | LOC119628 | 0.844495 | 2.714371 | 3.063689 | 0.885981 | 0.375628 | 0.47673  | 0        | 0        | 0.695731 | 2.232127 | 2.139111 | 0        |
| 20938 | LOC119618 | 0.844495 | 2.714371 | 3.063689 | 0.885981 | 0.375628 | 0.47673  | 0        | 0        | 0.695731 | 2.232127 | 2.139111 | 0        |
| 20940 | MAGEB1    | 0.844495 | 2.714371 | 3.063689 | 0.885981 | 0.375628 | 0.47673  | 0        | 0        | 0.695731 | 2.232127 | 2.139111 | 0        |
| 20941 | LOC119620 | 0.844495 | 2.714371 | 3.063689 | 0.885981 | 0.375628 | 0.47673  | 0        | 0        | 0.695731 | 2.232127 | 2.139111 | 0        |
| 20943 | NAA10     | 0.844495 | 2.714371 | 3.063689 | 0.885981 | 0.375628 | 0.47673  | 0        | 0        | 0.695731 | 2.232127 | 2.139111 | 0        |
| 20945 | AMTN      | 0.844495 | 2.714371 | 3.063689 | 0.885981 | 0.3      |          |          |          |          |          |          |          |



|       |           |          |          |          |          |          |          |          |          |          |          |          |          |
|-------|-----------|----------|----------|----------|----------|----------|----------|----------|----------|----------|----------|----------|----------|
| 20946 | LOC119621 | 0.844495 | 2.714371 | 3.063689 | 0.885981 | 0.375628 | 0.47673  | 0        | 0        | 0.695731 | 2.232127 | 2.139111 | 0        |
| 20947 | LOC103218 | 0.844495 | 2.714371 | 3.063689 | 0.885981 | 0.375628 | 0.47673  | 0        | 0        | 0.695731 | 2.232127 | 2.139111 | 0        |
| 7213  | PDYN      | 12.87894 | 2.713585 | 0.740841 | 3.662844 | 0.000249 | 0.000919 | 2.710432 | 2.737059 | 4.87012  | 22.32127 | 23.53022 | 21.10457 |
| 9321  | L1TD1     | 11.89036 | 2.712822 | 0.896644 | 3.025529 | 0.002482 | 0.007079 | 2.168345 | 1.094824 | 6.261582 | 13.39276 | 36.36488 | 12.05975 |
| 16716 | NMU       | 2.25622  | 2.711845 | 1.761514 | 1.539497 | 0.123683 | 0.196704 | 1.084173 | 0        | 0.695731 | 4.464254 | 4.278221 | 3.014938 |
| 849   | IL1R2     | 152.854  | 2.710883 | 0.230085 | 11.78211 | 4.83E-32 | 1.51E-30 | 41.19856 | 37.77142 | 42.43961 | 256.6946 | 288.7799 | 250.2399 |
| 19079 | LOC119621 | 1.450528 | 2.710782 | 2.311911 | 1.172528 | 0.240985 | 0.355775 | 0        | 1.094824 | 0        | 4.464254 | 2.139111 | 1.004979 |
| 5897  | AATK      | 25.77583 | 2.710267 | 0.64288  | 4.215823 | 2.49E-05 | 0.000112 | 2.168345 | 6.568942 | 11.82743 | 51.33892 | 55.61688 | 27.13445 |
| 14302 | LOC119621 | 3.638714 | 2.708406 | 1.381301 | 1.960764 | 0.049907 | 0.092768 | 1.084173 | 1.094824 | 0.695731 | 2.232127 | 10.69555 | 6.029877 |
| 4164  | LOC119615 | 29.29855 | 2.707977 | 0.515957 | 5.24845  | 1.53E-07 | 9.79E-07 | 5.420864 | 8.758589 | 9.044508 | 51.33892 | 62.03421 | 39.1942  |
| 18597 | LOC103221 | 1.630436 | 2.707905 | 2.190989 | 1.235928 | 0.216485 | 0.309472 | 0        | 0        | 1.391463 | 2.232127 | 2.139111 | 4.019918 |
| 15250 | LOC119621 | 4.128833 | 2.707633 | 1.513962 | 1.788441 | 0.073705 | 0.128481 | 0.542086 | 0        | 2.782925 | 4.464254 | 14.97377 | 2.009959 |
| 19740 | LOC119615 | 1.417747 | 2.707492 | 2.549685 | 1.061893 | 0.288284 | 0.388249 | 1.084173 | 0        | 0        | 0        | 6.417332 | 1.004979 |
| 16232 | CUNH3orf4 | 2.257107 | 2.707274 | 1.669963 | 1.621158 | 0.104984 | 0.171944 | 0.542086 | 0.547412 | 0.695731 | 4.464254 | 4.278221 | 3.014938 |
| 8471  | LOC119615 | 11.2727  | 2.707094 | 0.829811 | 3.262302 | 0.001105 | 0.003468 | 1.084173 | 4.379295 | 3.478657 | 20.08914 | 23.53022 | 15.07469 |
| 19110 | LDLRAD1   | 1.43325  | 2.706708 | 2.318679 | 1.167349 | 0.243069 | 0.338148 | 1.084173 | 0        | 0        | 2.232127 | 4.278221 | 1.004979 |
| 6752  | BP1FC     | 16.72096 | 2.705682 | 0.705457 | 3.835361 | 0.000125 | 0.000494 | 2.168345 | 5.474118 | 5.565851 | 37.94616 | 32.08666 | 17.08465 |
| 21653 | LOC103230 | 0.803385 | 2.704818 | 3.455698 | 0.782713 | 0.433796 | 0.532477 | 0.542086 | 0        | 0        | 0        | 4.278221 | 0        |
| 21654 | LOC103231 | 0.803385 | 2.704818 | 3.455698 | 0.782713 | 0.433796 | 0.532477 | 0.542086 | 0        | 0        | 0        | 4.278221 | 0        |
| 21655 | FANCD2OS  | 0.803385 | 2.704818 | 3.455698 | 0.782713 | 0.433796 | 0.532477 | 0.542086 | 0        | 0        | 0        | 4.278221 | 0        |
| 21657 | LOC119615 | 0.803385 | 2.704818 | 3.455698 | 0.782713 | 0.433796 | 0.532477 | 0.542086 | 0        | 0        | 0        | 4.278221 | 0        |
| 21658 | LOC119620 | 0.803385 | 2.704818 | 3.455698 | 0.782713 | 0.433796 | 0.532477 | 0.542086 | 0        | 0        | 0        | 4.278221 | 0        |
| 21659 | LOC119621 | 0.803385 | 2.704818 | 3.455698 | 0.782713 | 0.433796 | 0.532477 | 0.542086 | 0        | 0        | 0        | 4.278221 | 0        |
| 21641 | LOC119621 | 0.804272 | 2.704777 | 3.454358 | 0.783004 | 0.433625 | 0.532418 | 0        | 0.547412 | 0        | 0        | 4.278221 | 0        |
| 21642 | LOC103228 | 0.804272 | 2.704777 | 3.454358 | 0.783004 | 0.433625 | 0.532418 | 0        | 0.547412 | 0        | 0        | 4.278221 | 0        |
| 21643 | LOC119620 | 0.804272 | 2.704777 | 3.454358 | 0.783004 | 0.433625 | 0.532418 | 0        | 0.547412 | 0        | 0        | 4.278221 | 0        |
| 21644 | LOC103241 | 0.804272 | 2.704777 | 3.454358 | 0.783004 | 0.433625 | 0.532418 | 0        | 0.547412 | 0        | 0        | 4.278221 | 0        |
| 21645 | LOC119615 | 0.804272 | 2.704777 | 3.454358 | 0.783004 | 0.433625 | 0.532418 | 0        | 0.547412 | 0        | 0        | 4.278221 | 0        |
| 21646 | LOC103230 | 0.804272 | 2.704777 | 3.454358 | 0.783004 | 0.433625 | 0.532418 | 0        | 0.547412 | 0        | 0        | 4.278221 | 0        |
| 21648 | LOC119620 | 0.804272 | 2.704777 | 3.454358 | 0.783004 | 0.433625 | 0.532418 | 0        | 0.547412 | 0        | 0        | 4.278221 | 0        |
| 21651 | LOC103241 | 0.804272 | 2.704777 | 3.454358 | 0.783004 | 0.433625 | 0.532418 | 0        | 0.547412 | 0        | 0        | 4.278221 | 0        |
| 21652 | LOC103241 | 0.804272 | 2.704777 | 3.454358 | 0.783004 | 0.433625 | 0.532418 | 0        | 0.547412 | 0        | 0        | 4.278221 | 0        |
| 7026  | BEST3     | 16.1648  | 2.704473 | 0.726039 | 3.72497  | 0.000195 | 0.000739 | 3.794605 | 2.737059 | 6.261582 | 40.17829 | 29.94755 | 14.06971 |
| 21582 | LOC119621 | 0.828992 | 2.703626 | 3.417933 | 0.791012 | 0.428937 | 0.528028 | 0        | 0        | 0.695731 | 0        | 4.278221 | 0        |
| 21583 | LOC119621 | 0.828992 | 2.703626 | 3.417933 | 0.791012 | 0.428937 | 0.528028 | 0        | 0        | 0.695731 | 0        | 4.278221 | 0        |
| 21584 | LOC119621 | 0.828992 | 2.703626 | 3.417933 | 0.791012 | 0.428937 | 0.528028 | 0        | 0        | 0.695731 | 0        | 4.278221 | 0        |
| 21585 | LOC119621 | 0.828992 | 2.703626 | 3.417933 | 0.791012 | 0.428937 | 0.528028 | 0        | 0        | 0.695731 | 0        | 4.278221 | 0        |
| 21586 | LOC119621 | 0.828992 | 2.703626 | 3.417933 | 0.791012 | 0.428937 | 0.528028 | 0        | 0        | 0.695731 | 0        | 4.278221 | 0        |
| 21587 | LOC119618 | 0.828992 | 2.703626 | 3.417933 | 0.791012 | 0.428937 | 0.528028 | 0        | 0        | 0.695731 | 0        | 4.278221 | 0        |
| 21588 | RPL10L    | 0.828992 | 2.703626 | 3.417933 | 0.791012 | 0.428937 | 0.528028 | 0        | 0        | 0.695731 | 0        | 4.278221 | 0        |
| 21589 | LOC119615 | 0.828992 | 2.703626 | 3.417933 | 0.791012 | 0.428937 | 0.528028 | 0        | 0        | 0.695731 | 0        | 4.278221 | 0        |
| 21590 | LOC119621 | 0.828992 | 2.703626 | 3.417933 | 0.791012 | 0.428937 | 0.528028 | 0        | 0        | 0.695731 | 0        | 4.278221 | 0        |
| 21591 | TAS2R38   | 0.828992 | 2.703626 | 3.417933 | 0.791012 | 0.428937 | 0.528028 | 0        | 0        | 0.695731 | 0        | 4.278221 | 0        |
| 21592 | CRX       | 0.828992 | 2.703626 | 3.417933 | 0.791012 | 0.428937 | 0.528028 | 0        | 0        | 0.695731 | 0        | 4.278221 | 0        |
| 21593 | LOC119621 | 0.828992 | 2.703626 | 3.417933 | 0.791012 | 0.428937 | 0.528028 | 0        | 0        | 0.695731 | 0        | 4.278221 | 0        |
| 21594 | LOC103231 | 0.828992 | 2.703626 | 3.417933 | 0.791012 | 0.428937 | 0.528028 | 0        | 0        | 0.695731 | 0        | 4.278221 | 0        |
| 21595 | PVALEF    | 0.828992 | 2.703626 | 3.417933 | 0.791012 | 0.428937 | 0.528028 | 0        | 0        | 0.695731 | 0        | 4.278221 | 0        |
| 21596 | LOC103241 | 0.828992 | 2.703626 | 3.417933 | 0.791012 | 0.428937 | 0.528028 | 0        | 0        | 0.695731 | 0        | 4.278221 | 0        |
| 9073  | FAM9B     | 11.08489 | 2.701286 | 0.87415  | 3.090186 | 0.002    | 0.005861 | 3.794605 | 2.737059 | 2.087194 | 15.62489 | 34.22577 | 8.039836 |
| 7812  | POU3F2    | 22.38762 | 2.700789 | 0.779963 | 3.462713 | 0.000535 | 0.00182  | 1.084173 | 4.379295 | 12.52316 | 44.64254 | 55.61688 | 16.07967 |
| 12630 | TMCC1     | 5.412128 | 2.700546 | 1.187068 | 2.274972 | 0.022908 | 0.048218 | 0.542086 | 1.642235 | 2.087194 | 15.62489 | 8.556443 | 4.019918 |
| 18810 | LOC103231 | 17.32823 | 2.700248 | 2.221128 | 1.21571  | 0.224095 | 0.316724 | 0        | 0        | 13.91463 | 26.78552 | 49.19955 | 14.06971 |
| 16718 | TMEM252   | 2.309638 | 2.699903 | 1.754209 | 1.5391   | 0.12378  | 0.196835 | 0.542086 | 0.547412 | 0.695731 | 8.928508 | 2.139111 | 1.004979 |
| 16836 | TRIM67    | 20.57643 | 2.699241 | 1.777581 | 1.518491 | 0.128891 | 0.203526 | 0        | 0.547412 | 16.00182 | 26.78552 | 62.03421 | 18.08963 |
| 6278  | LOC103211 | 24.54344 | 2.69894  | 0.668397 | 4.03793  | 5.39E-05 | 0.000228 | 2.168345 | 7.663765 | 9.740239 | 42.41041 | 64.17332 | 21.10457 |
| 16889 | SERPINA9  | 2.242492 | 2.698537 | 1.788963 | 1.508437 | 0.131443 | 0.206892 | 0        | 1.094824 | 0.695731 | 2.232127 | 6.417332 | 3.014938 |
| 19132 | LOC103211 | 1.435025 | 2.697717 | 2.317665 | 1.16398  | 0.244432 | 0.339617 | 0        | 1.094824 | 0        | 2.232127 | 4.278221 | 1.004979 |
| 19133 | HIPK4     | 1.435025 | 2.697717 | 2.317665 | 1.16398  | 0.244432 | 0.339617 | 0        | 1.094824 | 0        | 2.232127 | 4.278221 | 1.004979 |
| 19134 | LOC119621 | 1.435025 | 2.697717 | 2.317665 | 1.16398  | 0.244432 | 0.339617 | 0        | 1.094824 | 0        | 2.232127 | 4.278221 | 1.004979 |
| 19765 | CUNH5orf4 | 1.419523 | 2.697711 | 2.548654 | 1.058485 | 0.289835 | 0.389843 | 0        | 1.094824 | 0        | 0        | 6.417332 | 1.004979 |
| 15289 | LOC119621 | 3.714545 | 2.697162 | 1.513939 | 1.781552 | 0.074822 | 0.130103 | 0        | 2.189647 | 0.695731 | 6.696381 | 10.69555 | 2.009959 |
| 4641  | LOC119621 | 38.89728 | 2.696512 | 0.547673 | 4.923584 | 8.50E-07 | 4.87E-06 | 8.131296 | 8.211177 | 14.61036 | 75.89232 | 98.39909 | 28.13943 |
| 18576 | LOC103221 | 1.667464 | 2.695108 | 2.176112 | 1.238497 | 0.215532 | 0.308427 | 0        | 0        | 1.391463 | 4.464254 | 2.139111 | 2.009959 |
| 18578 | NANOS2    | 1.667464 | 2.695108 | 2.176112 | 1.238497 | 0.215532 | 0.308427 | 0        | 0        | 1.391463 | 4.464254 | 2.139111 | 2.009959 |
| 321   | LOC119621 | 737.8293 | 2.694573 | 0.159379 | 16.90675 | 4.01E-64 | 3.32E-62 | 169.673  | 244.6931 | 177.4115 | 1316.955 | 1227.85  | 1290.394 |
| 5872  | LOC119621 | 42.85329 | 2.69426  | 0.637104 | 4.228914 | 2.35E-05 | 0.000106 | 2.710432 | 8.211177 | 23.65487 | 84.82083 | 100.5382 | 37.18424 |
| 14872 | HDGFL1    | 4.57879  | 2.693913 | 1.448961 | 1.859204 | 0.062998 | 0.112615 | 1.084173 | 1.094824 | 1.391463 | 8.928508 | 14.97377 | 0        |
| 20174 | DUSP29    | 1.719995 | 2.693292 | 2.691937 | 1.000503 | 0.317067 | 0.417753 | 0        | 0        | 1.391463 | 8.928508 | 0        | 0        |
| 14722 | ASB15     | 3.946984 | 2.691258 | 1.427711 | 1.885016 | 0.059428 | 0.107317 | 0        | 1.094824 | 2.087194 | 8.928508 | 8.556443 | 3.014938 |
| 5172  | LOC119621 | 27.96089 | 2.690727 | 0.58576  | 4.593568 | 4.36E-06 | 2.24E-05 | 7.589209 | 4.926706 | 9.740239 | 62.49956 | 59.8951  | 23.11453 |
| 3444  | LDHD      | 48.2036  | 2.690192 | 0.455375 | 5.907641 | 3.47E-09 | 2.68E-08 | 14.09425 | 6.568942 | 18.78475 | 73.66019 | 70.59065 | 105.5228 |
| 17279 | LOC119621 | 2.474931 | 2.690039 | 1.850754 | 1.453483 | 0.14609  | 0.22477  | 0        | 0        | 2.087194 | 4.464254 | 4.278221 | 4.019918 |
| 7195  | CTCFL     | 15.05057 | 2.689572 | 0.733129 | 3.66862  | 0.000244 | 0.000901 | 3.794605 | 3.284471 | 4.87012  | 26.78552 | 38.50399 | 13.06473 |
| 12341 | LOC103221 | 7.018469 | 2.689125 | 1.151144 | 2.336046 | 0.019489 | 0.041981 | 0        | 2.189647 | 3.478657 | 11.16063 | 19.252   | 6.029877 |



|       |           |          |          |          |          |           |           |          |          |          |          |          |          |
|-------|-----------|----------|----------|----------|----------|-----------|-----------|----------|----------|----------|----------|----------|----------|
| 15397 | LOC103234 | 3.423197 | 2.687053 | 1.526794 | 1.759931 | 0.07842   | 0.135402  | 2.168345 | 0.547412 | 0        | 2.232127 | 8.556443 | 7.034856 |
| 14219 | LOC11962  | 6.647703 | 2.686153 | 1.361095 | 1.973524 | 0.048436  | 0.09056   | 0        | 0.547412 | 4.87012  | 8.928508 | 23.53022 | 2.009959 |
| 7901  | GRIN1     | 24.74759 | 2.685742 | 0.781057 | 3.4386   | 0.000585  | 0.001967  | 1.084173 | 4.379295 | 14.61036 | 53.57105 | 57.75599 | 17.08465 |
| 6892  | LOC10324  | 24.79255 | 2.685176 | 0.710634 | 3.778565 | 0.000158  | 0.000608  | 4.878777 | 9.853413 | 4.87012  | 37.94616 | 79.14709 | 12.05975 |
| 14758 | PNPLA5    | 4.648502 | 2.684838 | 1.428065 | 1.880053 | 0.060101  | 0.108273  | 0.542086 | 0.547412 | 2.782925 | 0        | 14.97377 | 9.044815 |
| 11206 | LOC103234 | 9.348648 | 2.684756 | 1.039986 | 2.581532 | 0.009836  | 0.023336  | 1.626259 | 0.547412 | 5.565851 | 4.464254 | 27.80844 | 16.07967 |
| 7767  | MLPH      | 16.10253 | 2.684663 | 0.773025 | 3.47293  | 0.000515  | 0.001762  | 3.794605 | 2.189647 | 6.957314 | 24.5534  | 47.06043 | 12.05975 |
| 13879 | FCRLA     | 4.482156 | 2.684514 | 1.32009  | 2.033584 | 0.041994  | 0.080438  | 0        | 1.642235 | 2.087194 | 6.696381 | 6.417332 | 10.04979 |
| 474   | ZBTB7C    | 284.0414 | 2.683409 | 0.180579 | 14.86    | 5.99E-50  | 3.36E-48  | 68.30288 | 83.2066  | 78.61764 | 470.9788 | 485.5781 | 517.5644 |
| 18688 | LOC11962  | 1.651962 | 2.683299 | 2.180672 | 1.230492 | 0.218513  | 0.3108    | 0        | 0        | 1.391463 | 2.232127 | 4.278221 | 2.009959 |
| 18689 | LOC10323  | 1.651962 | 2.683299 | 2.180672 | 1.230492 | 0.218513  | 0.3108    | 0        | 0        | 1.391463 | 2.232127 | 4.278221 | 2.009959 |
| 18690 | LOC10323  | 1.651962 | 2.683299 | 2.180672 | 1.230492 | 0.218513  | 0.3108    | 0        | 0        | 1.391463 | 2.232127 | 4.278221 | 2.009959 |
| 18691 | LOC11961  | 1.651962 | 2.683299 | 2.180672 | 1.230492 | 0.218513  | 0.3108    | 0        | 0        | 1.391463 | 2.232127 | 4.278221 | 2.009959 |
| 10084 | LOC10323  | 14.26938 | 2.683209 | 0.94438  | 2.841238 | 0.004494  | 0.011849  | 0        | 3.284471 | 8.348776 | 24.5534  | 36.36488 | 13.06473 |
| 16164 | KCNG2     | 3.106737 | 2.682859 | 1.641965 | 1.633932 | 0.102273  | 0.168209  | 1.084173 | 0        | 1.391463 | 4.464254 | 10.69555 | 1.004979 |
| 772   | NRN1      | 172.9064 | 2.682743 | 0.217991 | 12.30666 | 8.34E-35  | 2.87E-33  | 41.19856 | 49.26706 | 49.39693 | 299.105  | 308.0319 | 290.4391 |
| 17383 | POU3F4    | 2.511959 | 2.682405 | 1.872887 | 1.43223  | 0.152078  | 0.232583  | 0        | 0        | 2.087194 | 6.696381 | 4.278221 | 2.009959 |
| 6649  | LOC10322  | 16.04854 | 2.682194 | 0.691454 | 3.879065 | 0.000105  | 0.000419  | 5.96295  | 3.284471 | 3.478657 | 31.24978 | 34.22577 | 18.08963 |
| 10524 | LOC10322  | 10.58119 | 2.681719 | 0.979183 | 2.738732 | 0.006168  | 0.015579  | 1.626259 | 3.284471 | 3.478657 | 17.85702 | 34.22577 | 3.014938 |
| 14794 | CYP3A7    | 3.709055 | 2.681636 | 1.430697 | 1.874357 | 0.060881  | 0.109404  | 1.626259 | 0        | 1.391463 | 8.928508 | 4.278221 | 6.029877 |
| 14980 | LOC10322  | 3.915979 | 2.681432 | 1.458746 | 1.838177 | 0.066036  | 0.117195  | 0        | 1.094824 | 2.087194 | 4.464254 | 12.83466 | 3.014938 |
| 11025 | GATA1     | 18.33226 | 2.681146 | 1.021709 | 2.624179 | 0.008686  | 0.020944  | 0        | 1.094824 | 13.91463 | 42.41041 | 38.50399 | 14.06971 |
| 546   | KLF9      | 474.0977 | 2.681088 | 0.189564 | 14.14342 | 2.05E-45  | 9.98E-44  | 114.9223 | 156.0124 | 113.4042 | 805.7978 | 686.6545 | 967.7952 |
| 19521 | LOC11962  | 38.61932 | 2.680721 | 2.442088 | 1.097717 | 0.272328  | 0.370875  | 0        | 0        | 31.30791 | 66.96381 | 96.25998 | 37.18424 |
| 19491 | LOC10324  | 1.704492 | 2.680628 | 2.432665 | 1.101931 | 0.270492  | 0.368922  | 0        | 0        | 1.391463 | 6.696381 | 2.139111 | 0        |
| 18988 | LOC11961  | 2.115646 | 2.680301 | 2.258242 | 1.186897 | 0.235268  | 0.329398  | 1.626259 | 0        | 0        | 8.928508 | 2.139111 | 0        |
| 4882  | LOC11962  | 29.33446 | 2.679681 | 0.563987 | 4.75132  | 2.02E-06  | 1.10E-05  | 3.794605 | 8.758589 | 11.1317  | 60.26743 | 59.8951  | 32.15934 |
| 12564 | NRK       | 10.84263 | 2.679524 | 1.169941 | 2.290306 | 0.022004  | 0.046555  | 0        | 0.547412 | 8.348776 | 22.32127 | 27.80844 | 6.029877 |
| 11197 | TNNT3     | 9.467529 | 2.678084 | 1.03695  | 2.582655 | 0.009804  | 0.023276  | 0.542086 | 1.642235 | 5.565851 | 8.928508 | 32.08666 | 8.039836 |
| 18101 | LOC10324  | 2.248515 | 2.677896 | 2.0279   | 1.320526 | 0.186659  | 0.274147  | 0        | 1.094824 | 0.695731 | 0        | 10.69555 | 1.004979 |
| 13638 | KCNK17    | 4.338388 | 2.677553 | 1.286443 | 2.081361 | 0.037401  | 0.072907  | 0.542086 | 2.189647 | 0.695731 | 11.16063 | 6.417332 | 5.024897 |
| 1586  | TREM1     | 100.1955 | 2.676638 | 0.297156 | 9.007526 | 2.11E-19  | 3.53E-18  | 23.30971 | 34.48694 | 23.65487 | 171.8738 | 151.8769 | 195.971  |
| 16555 | CEACAM7   | 3.356454 | 2.676069 | 1.710368 | 1.564616 | 0.117673  | 0.188955  | 0        | 0        | 2.782925 | 8.928508 | 6.417332 | 2.009959 |
| 10354 | TEX35     | 11.04182 | 2.67535  | 0.963883 | 2.775597 | 0.00551   | 0.014148  | 0.542086 | 2.189647 | 6.261582 | 24.5534  | 25.66933 | 7.034856 |
| 4037  | LOC11962  | 903.9871 | 2.673665 | 0.500209 | 5.345091 | 9.04E-08  | 5.95E-07  | 160.4576 | 193.2364 | 381.2608 | 1732.131 | 2017.181 | 939.6558 |
| 8298  | CCDC187   | 14.38414 | 2.673546 | 0.806918 | 3.313282 | 0.000922  | 0.002954  | 1.084173 | 4.379295 | 6.261582 | 17.85702 | 40.6431  | 16.07967 |
| 7110  | GAB3      | 17.45727 | 2.672932 | 0.723747 | 3.693186 | 0.000221  | 0.000828  | 6.505036 | 3.831883 | 3.478657 | 44.64254 | 34.22577 | 12.05975 |
| 16602 | LOC11962  | 3.266895 | 2.672862 | 1.716985 | 1.556719 | 0.119537  | 0.191416  | 0        | 0        | 2.782925 | 2.232127 | 8.556443 | 6.029877 |
| 7970  | CFAP126   | 12.8275  | 2.671773 | 0.781456 | 3.418967 | 0.000629  | 0.002097  | 1.626259 | 3.284471 | 5.565851 | 29.01765 | 21.39111 | 16.07967 |
| 16314 | LOC10323  | 30.11974 | 2.671624 | 1.666884 | 1.602765 | 0.108986  | 0.177602  | 0        | 1.642235 | 22.95914 | 75.89232 | 47.06043 | 33.16432 |
| 18074 | LOC11961  | 2.095009 | 2.671365 | 2.010531 | 1.328686 | 0.183951  | 0.270574  | 1.084173 | 0.547412 | 0        | 8.928508 | 0        | 2.009959 |
| 19013 | LOC10324  | 2.118309 | 2.669978 | 2.257774 | 1.182571 | 0.236979  | 0.331357  | 0        | 1.642235 | 0        | 8.928508 | 2.139111 | 0        |
| 10342 | CAPN9     | 8.150725 | 2.669826 | 0.960754 | 2.778886 | 0.005455  | 0.014021  | 1.626259 | 1.642235 | 3.478657 | 6.696381 | 21.39111 | 14.06971 |
| 16585 | LOC11962  | 3.340951 | 2.669732 | 1.711628 | 1.559762 | 0.118816  | 0.190457  | 0        | 0        | 2.782925 | 6.696381 | 8.556443 | 2.009959 |
| 10210 | LOC10323  | 7.712249 | 2.669274 | 0.948499 | 2.814208 | 0.00489   | 0.012732  | 2.710432 | 2.189647 | 1.391463 | 8.928508 | 14.97377 | 16.07967 |
| 9953  | PTPRO     | 11.74936 | 2.66871  | 0.928534 | 2.874111 | 0.004052  | 0.010822  | 1.084173 | 1.642235 | 6.957314 | 13.39276 | 36.36488 | 11.05477 |
| 10095 | DACT2     | 10.87972 | 2.668002 | 0.93955  | 2.83966  | 0.004516  | 0.011893  | 1.084173 | 2.189647 | 5.565851 | 29.01765 | 21.39111 | 6.029877 |
| 19465 | LOC11962  | 1.68899  | 2.667866 | 2.411135 | 1.106477 | 0.26852   | 0.366722  | 0        | 0        | 1.391463 | 4.464254 | 4.278221 | 0        |
| 19466 | TAC4      | 1.68899  | 2.667866 | 2.411135 | 1.106477 | 0.26852   | 0.366722  | 0        | 0        | 1.391463 | 4.464254 | 4.278221 | 0        |
| 11571 | ATP6V1B1  | 10.50744 | 2.667597 | 1.066559 | 2.501125 | 0.01238   | 0.028444  | 0.542086 | 0.547412 | 7.653045 | 11.16063 | 32.08666 | 11.05477 |
| 4768  | LIMS2     | 25.14991 | 2.666826 | 0.552007 | 4.83115  | 1.36E-06  | 7.57E-06  | 5.420864 | 5.474118 | 9.740239 | 53.57105 | 38.50399 | 38.18922 |
| 10027 | LOC10322  | 10.61765 | 2.666767 | 0.934003 | 2.855202 | 0.004301  | 0.011403  | 1.626259 | 5.474118 | 1.391463 | 8.928508 | 34.22577 | 12.05975 |
| 12046 | UNC45B    | 10.54535 | 2.665804 | 1.111769 | 2.397804 | 0.016494  | 0.036401  | 0        | 1.094824 | 7.653045 | 13.39276 | 32.08666 | 9.044815 |
| 16076 | SLC22A6   | 4.074362 | 2.665634 | 1.613736 | 1.65184  | 0.098567  | 0.162984  | 0        | 0        | 3.478657 | 2.232127 | 10.69555 | 8.039836 |
| 16078 | LOC10324  | 4.074362 | 2.665634 | 1.613736 | 1.65184  | 0.098567  | 0.162984  | 0        | 0        | 3.478657 | 2.232127 | 10.69555 | 8.039836 |
| 15941 | PNMA5     | 29.49569 | 2.665553 | 1.588968 | 1.677537 | 0.093438  | 0.155827  | 0        | 3.284471 | 20.87194 | 53.57105 | 79.14709 | 20.09959 |
| 56    | HMOX1     | 5517.724 | 2.664793 | 0.092911 | 28.68125 | 6.54E-181 | 3.10E-178 | 1507.542 | 1462.137 | 1542.436 | 9263.327 | 9056.995 | 10273.91 |
| 14702 | LOC10322  | 3.783998 | 2.663413 | 1.408902 | 1.890418 | 0.058702  | 0.106149  | 1.084173 | 0.547412 | 1.391463 | 13.39276 | 4.278221 | 2.009959 |
| 1580  | PRODH2    | 132.7006 | 2.663261 | 0.294785 | 9.034582 | 1.65E-19  | 2.77E-18  | 42.82482 | 21.89647 | 44.52681 | 216.5163 | 218.1893 | 252.2498 |
| 11054 | CD6       | 12.85641 | 2.662691 | 1.01833  | 2.614763 | 0.008929  | 0.021474  | 1.626259 | 0        | 0.044508 | 22.32127 | 32.08666 | 12.05975 |
| 6060  | KMO       | 19.91193 | 2.662019 | 0.642812 | 4.141211 | 3.45E-05  | 0.000152  | 5.96295  | 3.284471 | 6.957314 | 51.33892 | 27.80844 | 24.11951 |
| 8221  | PGC       | 12.82227 | 2.66188  | 0.796761 | 3.340876 | 0.000835  | 0.002701  | 2.710432 | 2.189647 | 5.565851 | 22.32127 | 32.08666 | 12.05975 |
| 375   | SLC16A2   | 478.005  | 2.661652 | 0.165311 | 16.10088 | 2.51E-58  | 1.78E-56  | 110.5856 | 143.4219 | 138.4505 | 850.4404 | 733.715  | 891.4168 |
| 10950 | TOPAZ1    | 8.860137 | 2.661643 | 1.00849  | 2.639237 | 0.008309  | 0.020174  | 0.542086 | 3.831883 | 2.782925 | 11.16063 | 27.80844 | 7.034856 |
| 1261  | COL14A1   | 131.7609 | 2.661297 | 0.266905 | 9.970951 | 2.04E-23  | 4.31E-22  | 29.27266 | 35.58177 | 43.13534 | 212.0521 | 269.5279 | 200.9959 |
| 16981 | PVALB     | 2.260302 | 2.660571 | 1.779041 | 1.495508 | 0.134782  | 0.211011  | 0.542086 | 0        | 1.391463 | 4.464254 | 2.139111 | 5.024897 |
| 19445 | KDF1      | 1.636459 | 2.660238 | 2.396093 | 1.11024  | 0.266896  | 0.364803  | 0        | 0        | 1.391463 | 0        | 6.417332 | 2.009959 |
| 19446 | LOC10323  | 1.636459 | 2.660238 | 2.396093 | 1.11024  | 0.266896  | 0.364803  | 0        | 0        | 1.391463 | 0        | 6.417332 | 2.009959 |
| 19448 | LOC11961  | 1.636459 | 2.660238 | 2.396093 | 1.11024  | 0.266896  | 0.364803  | 0        | 0        | 1.391463 | 0        | 6.417332 | 2.009959 |
| 17294 | KCNB2     | 4.206971 | 2.660155 | 1.834783 | 1.449847 | 0.147101  | 0.22613   | 0        | 0        | 3.478657 | 8.928508 | 12.83466 | 0        |
| 10793 | LOC11962  | 13.64501 | 2.660152 | 0.995557 | 2.672023 | 0.00754   | 0.018572  | 0        | 1.642235 | 9.740239 | 22.32127 | 32.08666 | 16.07967 |
| 11536 | CCDC162P  | 8.088811 | 2.658999 | 1.060861 | 2.506453 | 0.012195  | 0.028103  | 1.084173 | 3.284471 | 2.087194 | 13.39276 | 25.66933 | 3.014938 |
|       |           |          |          |          |          |           |           |          |          |          |          |          |          |



|       |           |          |          |          |          |           |           |          |          |          |          |          |          |
|-------|-----------|----------|----------|----------|----------|-----------|-----------|----------|----------|----------|----------|----------|----------|
| 6228  | LOC103221 | 20.18639 | 2.656381 | 0.653622 | 4.064097 | 4.82E-05  | 0.000206  | 7.589209 | 3.831883 | 4.87012  | 31.24978 | 53.47777 | 20.09959 |
| 12578 | ADGRE1    | 10.68461 | 2.656274 | 1.160691 | 2.288528 | 0.022107  | 0.046725  | 0        | 0.547412 | 8.348776 | 26.78552 | 21.39111 | 7.034856 |
| 9755  | LOC103245 | 9.964361 | 2.655768 | 0.910871 | 2.915635 | 0.00355   | 0.009674  | 1.084173 | 1.642235 | 5.565851 | 22.32127 | 17.11289 | 12.05975 |
| 19599 | LOC119625 | 1.673487 | 2.654905 | 2.443642 | 1.086454 | 0.277278  | 0.376052  | 0        | 0        | 1.391463 | 2.232127 | 6.417332 | 0        |
| 19600 | LOC119627 | 1.673487 | 2.654905 | 2.443642 | 1.086454 | 0.277278  | 0.376052  | 0        | 0        | 1.391463 | 2.232127 | 6.417332 | 0        |
| 19603 | TSPAN16   | 1.673487 | 2.654905 | 2.443642 | 1.086454 | 0.277278  | 0.376052  | 0        | 0        | 1.391463 | 2.232127 | 6.417332 | 0        |
| 19604 | LOC119627 | 1.673487 | 2.654905 | 2.443642 | 1.086454 | 0.277278  | 0.376052  | 0        | 0        | 1.391463 | 2.232127 | 6.417332 | 0        |
| 17002 | DCD       | 3.309946 | 2.654706 | 1.77973  | 1.491634 | 0.135795  | 0.212322  | 0        | 0        | 2.782925 | 2.232127 | 12.83466 | 2.009959 |
| 17003 | LOC103237 | 3.309946 | 2.654706 | 1.77973  | 1.491634 | 0.135795  | 0.212322  | 0        | 0        | 2.782925 | 2.232127 | 12.83466 | 2.009959 |
| 11249 | CD4       | 13.65706 | 2.65445  | 1.032671 | 2.570471 | 0.010156  | 0.024002  | 0        | 1.642235 | 9.740239 | 17.85702 | 40.6431  | 12.05975 |
| 17639 | LINC02881 | 3.251393 | 2.652799 | 1.895514 | 1.399514 | 0.161659  | 0.243648  | 0        | 0        | 2.782925 | 0        | 10.69555 | 6.029877 |
| 57    | FXDY2     | 17919.14 | 2.652678 | 0.092567 | 28.65682 | 1.32E-180 | 6.15E-178 | 4539.973 | 5333.433 | 4878.468 | 31586.83 | 29778.56 | 31397.57 |
| 2967  | PCDH12    | 60.32286 | 2.652627 | 0.410066 | 6.468777 | 9.88E-11  | 8.85E-10  | 13.01007 | 12.59047 | 24.3506  | 80.35657 | 141.1813 | 90.44815 |
| 12660 | LOC103226 | 8.026057 | 2.652362 | 1.169433 | 2.268075 | 0.023325  | 0.04898   | 0.542086 | 0.547412 | 5.565851 | 26.78552 | 10.69555 | 4.019918 |
| 12994 | KRT20     | 6.581505 | 2.65059  | 1.202523 | 2.20419  | 0.027511  | 0.056286  | 0        | 3.284471 | 2.087194 | 6.696381 | 21.39111 | 6.029877 |
| 13099 | SPEM3     | 8.986143 | 2.650493 | 1.211137 | 2.188012 | 0.028669  | 0.058184  | 0        | 0.547412 | 6.957314 | 17.85702 | 23.53022 | 5.024897 |
| 11356 | FSIP2     | 10.61314 | 2.649969 | 1.040707 | 2.546317 | 0.010887  | 0.02548   | 0.542086 | 6.02153  | 2.087194 | 4.464254 | 38.50399 | 12.05975 |
| 4448  | LOC119625 | 35.83744 | 2.649834 | 0.525333 | 5.044107 | 4.56E-07  | 2.72E-06  | 9.757555 | 6.02153  | 13.91463 | 37.94616 | 94.12087 | 53.26391 |
| 18777 | TAS1R2    | 2.502479 | 2.649175 | 2.167873 | 1.222016 | 0.221702  | 0.313891  | 0        | 0        | 2.087194 | 2.232127 | 10.69555 | 0        |
| 17380 | LOC119618 | 2.079506 | 2.648916 | 1.848963 | 1.43265  | 0.151958  | 0.23244   | 1.084173 | 0.547412 | 0        | 6.696381 | 2.139111 | 2.009959 |
| 11161 | TTC9B     | 10.36064 | 2.648616 | 1.022704 | 2.589816 | 0.009603  | 0.022873  | 3.794605 | 1.094824 | 3.478657 | 37.94616 | 12.83466 | 3.014938 |
| 7303  | ANKRD35   | 18.49152 | 2.646484 | 0.728266 | 3.633952 | 0.000279  | 0.001016  | 5.96295  | 2.189647 | 6.957314 | 35.71403 | 47.06043 | 13.06473 |
| 17387 | LOC119618 | 2.080393 | 2.646005 | 1.848803 | 1.431199 | 0.152373  | 0.232981  | 0.542086 | 1.094824 | 0        | 6.696381 | 2.139111 | 2.009959 |
| 4084  | PDK4      | 33.91817 | 2.645268 | 0.498296 | 5.308624 | 0.10E-07  | 7.19E-07  | 10.84173 | 12.04306 | 4.87012  | 46.87467 | 70.59065 | 58.28881 |
| 15930 | LOC103217 | 3.126322 | 2.644792 | 1.574645 | 1.679612 | 0.093033  | 0.155259  | 0.542086 | 0        | 2.087194 | 6.696381 | 6.417332 | 3.014938 |
| 14704 | LOC119626 | 4.800696 | 2.644691 | 1.399486 | 1.889758 | 0.05879   | 0.106294  | 0        | 0.547412 | 3.478657 | 8.928508 | 12.83466 | 3.014938 |
| 18033 | CCDC152   | 2.065778 | 2.643691 | 1.977136 | 1.337132 | 0.18118   | 0.267102  | 0        | 1.642235 | 0        | 4.464254 | 4.278221 | 2.009959 |
| 12641 | UCP3      | 6.073623 | 2.643391 | 1.163328 | 2.272266 | 0.02307   | 0.048519  | 0.542086 | 1.642235 | 2.782925 | 15.62489 | 12.83466 | 3.014938 |
| 12949 | LOC103237 | 4.973389 | 2.642615 | 1.193801 | 2.213615 | 0.026855  | 0.055135  | 1.626259 | 1.642235 | 0.695731 | 11.16063 | 10.69555 | 4.019918 |
| 14414 | LOC119618 | 3.465195 | 2.642411 | 1.361381 | 1.940978 | 0.052261  | 0.096389  | 1.084173 | 1.094824 | 0.695731 | 4.464254 | 6.417332 | 7.034856 |
| 5121  | KLK14     | 39.2224  | 2.641434 | 0.571942 | 4.618358 | 3.87E-06  | 2.01E-05  | 5.420864 | 7.663765 | 19.48048 | 69.19594 | 98.39909 | 35.17428 |
| 14589 | PAD13     | 3.466083 | 2.640494 | 1.383232 | 1.90893  | 0.056271  | 0.102541  | 0.542086 | 1.642235 | 0.695731 | 4.464254 | 6.417332 | 7.034856 |
| 7679  | GPR179    | 29.71825 | 2.640326 | 0.754683 | 3.49859  | 0.000468  | 0.001619  | 1.084173 | 4.379295 | 19.48048 | 40.17829 | 77.00798 | 36.17926 |
| 20339 | LOC119627 | 1.657984 | 2.639678 | 2.718884 | 0.970868 | 0.331614  | 0.433451  | 0        | 0        | 1.391463 | 0        | 8.556443 | 0        |
| 13151 | NPFFR1    | 5.227353 | 2.639474 | 1.210384 | 2.18069  | 0.029206  | 0.059041  | 1.626259 | 0.547412 | 2.087194 | 13.39276 | 10.69555 | 3.014938 |
| 12969 | LOC119627 | 6.14847  | 2.639005 | 1.194471 | 2.209351 | 0.02715   | 0.055655  | 0.542086 | 0.547412 | 4.174388 | 4.464254 | 17.11289 | 10.04979 |
| 12175 | LOC103247 | 6.430471 | 2.638594 | 1.112841 | 2.371044 | 0.017738  | 0.038732  | 3.252518 | 0.547412 | 1.391463 | 13.39276 | 14.97377 | 5.024897 |
| 11748 | LOC119618 | 6.810229 | 2.637798 | 1.072719 | 2.458983 | 0.013933  | 0.03153   | 0.542086 | 1.094824 | 4.174388 | 11.16063 | 12.83466 | 11.05477 |
| 3259  | NEURL3    | 40.4228  | 2.637371 | 0.433254 | 6.08735  | 1.15E-09  | 9.36E-09  | 13.01007 | 10.94824 | 9.740239 | 53.57105 | 74.86887 | 80.39836 |
| 16030 | LOC119626 | 3.111707 | 2.636126 | 1.587393 | 1.660664 | 0.096781  | 0.160507  | 0        | 0.547412 | 2.087194 | 4.464254 | 8.556443 | 3.014938 |
| 18148 | LOC103237 | 2.050276 | 2.636102 | 2.007949 | 1.312833 | 0.189239  | 0.277216  | 0        | 1.642235 | 0        | 2.232127 | 6.417332 | 2.009959 |
| 197   | PTX3      | 982.6591 | 2.635463 | 0.12936  | 20.3731  | 2.90E-92  | 3.91E-90  | 269.959  | 295.6024 | 252.5505 | 1589.274 | 1619.307 | 1869.262 |
| 2396  | ZNF630    | 64.95356 | 2.635415 | 0.362126 | 7.277618 | 3.40E-13  | 3.77E-12  | 16.26259 | 15.32753 | 22.2634  | 133.9276 | 115.512  | 86.42823 |
| 11877 | LOC119627 | 15.48248 | 2.633629 | 1.083135 | 2.431487 | 0.015037  | 0.03366   | 0        | 0.547412 | 12.52316 | 37.94616 | 27.80844 | 14.06971 |
| 1311  | SYCE3     | 127.0575 | 2.632806 | 0.268213 | 9.816113 | 9.60E-23  | 1.95E-21  | 40.11439 | 30.65506 | 35.4823  | 236.6055 | 173.268  | 246.22   |
| 13768 | PLK5      | 4.382858 | 2.631536 | 1.281564 | 2.053379 | 0.040036  | 0.077306  | 1.626259 | 0.547412 | 1.391463 | 11.16063 | 8.556443 | 3.014938 |
| 17445 | CD3E      | 2.0485   | 2.63123  | 1.854073 | 1.419162 | 0.155852  | 0.237508  | 1.084173 | 0.547412 | 0        | 2.232127 | 6.417332 | 2.009959 |
| 6961  | HPN       | 16.77093 | 2.630133 | 0.70082  | 3.752939 | 0.000175  | 0.000667  | 3.252518 | 3.284471 | 7.653045 | 40.17829 | 17.11289 | 29.1444  |
| 13240 | CAPNS2    | 5.198123 | 2.629973 | 1.218318 | 2.158693 | 0.030874  | 0.061993  | 0.542086 | 1.642235 | 2.087194 | 8.928508 | 14.97377 | 3.014938 |
| 13614 | IRX6      | 4.315712 | 2.629056 | 1.259855 | 2.086793 | 0.036907  | 0.072071  | 1.084173 | 1.094824 | 1.391463 | 4.464254 | 12.83466 | 5.024897 |
| 1927  | LOC103220 | 86.02828 | 2.628814 | 0.322866 | 8.142117 | 3.88E-16  | 5.36E-15  | 21.68345 | 19.70683 | 30.61218 | 131.6955 | 181.8244 | 130.6473 |
| 16280 | IGSF21    | 3.096204 | 2.628644 | 1.631166 | 1.611512 | 0.107068  | 0.17483   | 0        | 0.547412 | 2.087194 | 2.232127 | 10.69555 | 3.014938 |
| 16281 | LOC103247 | 3.096204 | 2.628644 | 1.631166 | 1.611512 | 0.107068  | 0.17483   | 0        | 0.547412 | 2.087194 | 2.232127 | 10.69555 | 3.014938 |
| 17458 | ERVFRD-1  | 2.049388 | 2.62831  | 1.853911 | 1.417711 | 0.156275  | 0.237975  | 0.542086 | 1.094824 | 0        | 2.232127 | 6.417332 | 2.009959 |
| 10756 | MYLK3     | 8.884502 | 2.628127 | 0.983163 | 2.673141 | 0.007514  | 0.018521  | 2.710432 | 0.547412 | 4.174388 | 11.16063 | 25.66933 | 9.044815 |
| 10555 | LOC119628 | 8.140821 | 2.627529 | 0.961397 | 2.733033 | 0.006275  | 0.015806  | 1.626259 | 1.642235 | 3.478657 | 20.08914 | 14.97377 | 7.034856 |
| 12328 | CX3CR1    | 6.038902 | 2.627468 | 1.12334  | 2.338978 | 0.019337  | 0.041699  | 1.084173 | 0.547412 | 3.478657 | 13.39276 | 10.69555 | 7.034856 |
| 18593 | LOC119624 | 1.437332 | 2.627337 | 2.125681 | 1.235998 | 0.216459  | 0.309452  | 0.542086 | 0        | 0.695731 | 2.232127 | 2.139111 | 3.014938 |
| 18594 | LOC119620 | 1.437332 | 2.627337 | 2.125681 | 1.235998 | 0.216459  | 0.309452  | 0.542086 | 0        | 0.695731 | 2.232127 | 2.139111 | 3.014938 |
| 7839  | ADRA1A    | 18.63495 | 2.627331 | 0.760287 | 3.45571  | 0.000549  | 0.001861  | 3.252518 | 3.831883 | 8.348776 | 42.41041 | 44.92132 | 9.044815 |
| 17180 | LOC103214 | 2.267212 | 2.627292 | 1.786306 | 1.470796 | 0.141346  | 0.218725  | 0        | 0.547412 | 1.391463 | 2.232127 | 6.417332 | 3.014938 |
| 4835  | LOC119627 | 26.8699  | 2.626065 | 0.547962 | 4.792422 | 1.65E-06  | 9.06E-06  | 4.336691 | 7.116354 | 11.1317  | 49.10679 | 51.33866 | 38.18922 |
| 6949  | LOC103217 | 20.58106 | 2.625918 | 0.698919 | 3.757114 | 0.000172  | 0.000658  | 2.710432 | 6.02153  | 8.348776 | 35.71403 | 55.61688 | 15.07469 |
| 5808  | LOC103230 | 24.30406 | 2.623847 | 0.614511 | 4.26981  | 1.96E-05  | 8.96E-05  | 6.505036 | 6.02153  | 7.653045 | 26.78552 | 72.72976 | 26.12947 |
| 18825 | PNMA8B    | 13.23679 | 2.623827 | 2.160393 | 1.214514 | 0.224552  | 0.317116  | 0        | 0        | 11.1317  | 35.71403 | 23.53022 | 9.044815 |
| 15017 | LOC119627 | 3.756187 | 2.623262 | 1.43305  | 1.830545 | 0.067168  | 0.11891   | 1.084173 | 0        | 2.087194 | 8.928508 | 6.417332 | 4.019918 |
| 18607 | LOC103236 | 1.43822  | 2.623231 | 2.125245 | 1.234319 | 0.217084  | 0.309867  | 0        | 0.547412 | 0.695731 | 2.232127 | 2.139111 | 3.014938 |
| 11887 | LOC103220 | 13.6359  | 2.622834 | 1.080025 | 2.428493 | 0.015162  | 0.033909  | 0        | 0.547412 | 11.1317  | 20.08914 | 29.94755 | 20.09959 |
| 8738  | ECEL1     | 14.38382 | 2.622155 | 0.821414 | 3.192244 | 0.001412  | 0.004295  | 1.084173 | 2.737059 | 8.348776 | 31.24978 | 27.80844 | 15.07469 |
| 17331 | CNGA2     | 2.319743 | 2.621534 | 1.816064 | 1.443525 | 0.148873  | 0.228351  | 0        | 0.547412 | 1.391463 | 6.696381 | 4.278221 | 1.004979 |
| 12231 | APCDD1L   | 12.02699 | 2.621372 | 1.110629 | 2.36026  | 0.018262  | 0.039694  | 0        | 0.547412 | 9.740239 | 17.85702 | 29.94755 | 14.06971 |
| 5123  | XDH       | 24.51465 |          |          |          |           |           |          |          |          |          |          |          |



|       |           |          |          |          |          |           |           |          |          |          |          |          |          |
|-------|-----------|----------|----------|----------|----------|-----------|-----------|----------|----------|----------|----------|----------|----------|
| 14382 | POU4F3    | 5.384941 | 2.61751  | 1.343696 | 1.947993 | 0.051416  | 0.095042  | 0        | 1.094824 | 3.478657 | 4.464254 | 19.252   | 4.019918 |
| 4289  | NEURL1    | 53.538   | 2.617178 | 0.506919 | 5.162906 | 2.43E-07  | 1.51E-06  | 9.757555 | 7.663765 | 27.82925 | 93.74933 | 121.9293 | 60.29877 |
| 17287 | LOC103235 | 2.981501 | 2.616789 | 1.803227 | 1.45117  | 0.146732  | 0.225654  | 0        | 1.094824 | 1.391463 | 13.39276 | 0        | 2.009959 |
| 158   | NCAM1     | 7270.473 | 2.615837 | 0.120577 | 21.69432 | 2.32E-104 | 3.91E-102 | 1904.892 | 2395.474 | 1817.946 | 12182.95 | 11869.93 | 13451.65 |
| 15168 | FGF8      | 3.576279 | 2.615504 | 1.451395 | 1.802062 | 0.071536  | 0.125377  | 1.084173 | 1.094824 | 0.695731 | 11.16063 | 6.417332 | 1.004979 |
| 16443 | LIPM      | 3.512493 | 2.615376 | 1.653787 | 1.581447 | 0.113776  | 0.183953  | 2.168345 | 0        | 0.695731 | 2.232127 | 14.97377 | 1.004979 |
| 13293 | SLC45A2   | 6.0467   | 2.614286 | 1.216254 | 2.149457 | 0.031598  | 0.063194  | 0        | 1.642235 | 3.478657 | 11.16063 | 14.97377 | 5.024897 |
| 11780 | LOC119618 | 6.602509 | 2.613816 | 1.065492 | 2.453155 | 0.014161  | 0.031958  | 0.542086 | 1.642235 | 3.478657 | 8.928508 | 14.97377 | 10.04979 |
| 18403 | LOC119621 | 112.5302 | 2.613798 | 2.067723 | 1.264095 | 0.206196  | 0.297871  | 0        | 1.642235 | 93.228   | 220.9806 | 258.8324 | 100.4979 |
| 17361 | GZMH      | 2.30424  | 2.613018 | 1.818136 | 1.437196 | 0.150662  | 0.23071   | 0        | 0.547412 | 1.391463 | 4.464254 | 6.417332 | 1.004979 |
| 14803 | PTCRA     | 5.369439 | 2.612784 | 1.395669 | 1.872066 | 0.061197  | 0.109906  | 0        | 1.094824 | 3.478657 | 2.232127 | 21.39111 | 4.019918 |
| 19363 | LOC103235 | 1.490751 | 2.611825 | 2.320634 | 1.125479 | 0.260386  | 0.357505  | 0        | 0.547412 | 0.695731 | 6.696381 | 0        | 1.004979 |
| 13575 | LOC103235 | 4.33441  | 2.61137  | 1.247603 | 2.093109 | 0.036339  | 0.071166  | 1.084173 | 0.547412 | 2.087194 | 6.696381 | 8.556443 | 7.034856 |
| 9035  | LOC119621 | 14.12446 | 2.609808 | 0.840793 | 3.103982 | 0.001909  | 0.005618  | 0.542086 | 3.831883 | 7.653045 | 24.5534  | 32.08666 | 16.07967 |
| 10890 | LOC103228 | 7.801912 | 2.609297 | 0.983762 | 2.652366 | 0.007993  | 0.019511  | 2.710432 | 0.547412 | 3.478657 | 11.16063 | 12.83466 | 16.07967 |
| 1073  | LOC103246 | 138.3107 | 2.608988 | 0.24526  | 10.63764 | 1.99E-26  | 4.93E-25  | 41.74065 | 38.31883 | 36.17803 | 229.9091 | 271.6671 | 212.0507 |
| 45    | SPP1      | 367641.3 | 2.608866 | 0.085298 | 30.58516 | 1.93E-205 | 1.14E-202 | 103929.3 | 97032.03 | 109711.3 | 640645   | 646009.3 | 608521.1 |
| 12168 | LOC119621 | 9.380478 | 2.607051 | 1.098999 | 2.372206 | 0.017682  | 0.038633  | 0.542086 | 0.547412 | 6.957314 | 13.39276 | 27.80844 | 7.034856 |
| 6669  | TRIM29    | 16.31784 | 2.606875 | 0.673866 | 3.868537 | 0.000109  | 0.000436  | 3.252518 | 4.926706 | 5.565851 | 24.5534  | 38.50399 | 21.10457 |
| 6639  | UBQLNL    | 25.72834 | 2.60678  | 0.671346 | 3.882917 | 0.000103  | 0.000413  | 5.96295  | 3.284471 | 12.52316 | 33.4819  | 77.00798 | 22.10955 |
| 8781  | POU5F1    | 20.86953 | 2.605644 | 0.819597 | 3.179176 | 0.001477  | 0.004472  | 1.626259 | 1.642235 | 14.61036 | 40.17829 | 47.06043 | 20.09959 |
| 7273  | NWD1      | 22.24501 | 2.605512 | 0.715371 | 3.642185 | 0.00027   | 0.000988  | 2.710432 | 4.926706 | 11.1317  | 53.57105 | 47.06043 | 14.06971 |
| 8018  | LOC103235 | 20.64114 | 2.605109 | 0.764665 | 3.406862 | 0.000657  | 0.002179  | 5.420864 | 2.189647 | 9.740239 | 55.80317 | 40.6431  | 10.04979 |
| 17577 | LOC103235 | 2.288737 | 2.605067 | 1.855301 | 1.404121 | 0.160283  | 0.242412  | 0        | 0.547412 | 1.391463 | 2.232127 | 8.556443 | 1.004979 |
| 17578 | LOC119621 | 2.288737 | 2.605067 | 1.855301 | 1.404121 | 0.160283  | 0.242412  | 0        | 0.547412 | 1.391463 | 2.232127 | 8.556443 | 1.004979 |
| 13686 | LOC119619 | 5.389347 | 2.604006 | 1.256764 | 2.071994 | 0.038266  | 0.074332  | 0.542086 | 3.284471 | 0.695731 | 15.62489 | 2.139111 | 10.04979 |
| 12995 | LOC119621 | 6.500904 | 2.603807 | 1.181344 | 2.204106 | 0.027517  | 0.056294  | 1.626259 | 1.642235 | 2.087194 | 13.39276 | 19.252   | 1.004979 |
| 19282 | APCDD1    | 1.422717 | 2.603469 | 2.285619 | 1.139065 | 0.254676  | 0.351134  | 0        | 0.547412 | 0.695731 | 0        | 4.278221 | 3.014938 |
| 4822  | ZNF385D   | 51.20206 | 2.603332 | 0.542634 | 4.797579 | 1.61E-06  | 8.85E-06  | 8.131296 | 17.51718 | 17.39328 | 78.12444 | 151.8769 | 34.1693  |
| 9722  | PTGIR     | 11.67033 | 2.603303 | 0.890208 | 2.924377 | 0.003451  | 0.009438  | 2.710432 | 2.189647 | 4.87012  | 17.85702 | 36.36488 | 6.029877 |
| 7939  | AURKC     | 16.3211  | 2.600657 | 0.758788 | 3.427381 | 0.000609  | 0.002041  | 5.96295  | 5.474118 | 2.087194 | 51.33892 | 14.97377 | 18.08963 |
| 3665  | KLHL30    | 34.35481 | 2.600175 | 0.457495 | 5.683509 | 1.32E-08  | 9.57E-08  | 9.757555 | 10.94824 | 8.348776 | 51.33892 | 68.45154 | 57.28383 |
| 15602 | LOC103246 | 5.638906 | 2.600058 | 1.503822 | 1.728967 | 0.083815  | 0.142816  | 0        | 0        | 4.87012  | 6.696381 | 19.252   | 3.014938 |
| 5781  | GAP43     | 37.34009 | 2.599979 | 0.606894 | 4.284071 | 1.84E-05  | 8.44E-05  | 5.96295  | 4.379295 | 21.56767 | 73.66019 | 81.28621 | 37.18424 |
| 17900 | LOC103235 | 2.687051 | 2.599343 | 1.909666 | 1.361151 | 0.173466  | 0.257617  | 0        | 2.189647 | 0        | 2.232127 | 10.69555 | 1.004979 |
| 899   | PSTPIP1   | 252.9777 | 2.599308 | 0.22644  | 11.479   | 1.68E-30  | 4.97E-29  | 80.77087 | 50.36189 | 84.1835  | 486.6037 | 397.8746 | 418.0715 |
| 9378  | CABP4     | 12.49561 | 2.598764 | 0.862572 | 3.012806 | 0.002588  | 0.007338  | 3.252518 | 1.094824 | 6.261582 | 20.08914 | 34.22577 | 10.04979 |
| 16529 | LOC119621 | 2.663751 | 2.598513 | 1.654813 | 1.570276 | 0.116351  | 0.187137  | 1.084173 | 1.094824 | 0        | 2.232127 | 8.556443 | 3.014938 |
| 10768 | CTNNA2    | 10.41468 | 2.598148 | 0.971044 | 2.675625 | 0.007459  | 0.018415  | 1.084173 | 2.189647 | 5.565851 | 13.39276 | 34.22577 | 6.029877 |
| 1446  | MMP3      | 119.4473 | 2.597821 | 0.276966 | 3.979562 | 6.62E-21  | 1.22E-19  | 29.81475 | 29.56024 | 43.13534 | 171.8738 | 218.1893 | 224.1104 |
| 13929 | LOC103228 | 5.153922 | 2.597126 | 1.281987 | 2.02586  | 0.042779  | 0.081649  | 1.084173 | 0.547412 | 2.782925 | 2.232127 | 19.252   | 5.024897 |
| 106   | PXYLP1    | 2171.774 | 2.597013 | 0.108033 | 24.03902 | 1.09E-127 | 2.73E-125 | 626.6518 | 656.8942 | 564.9339 | 3555.778 | 3638.627 | 3987.759 |
| 12781 | LOC119618 | 5.666777 | 2.596469 | 1.157589 | 2.242997 | 0.024897  | 0.051787  | 1.084173 | 2.189647 | 1.391463 | 15.62489 | 10.69555 | 3.014938 |
| 8989  | TDO2      | 9.713389 | 2.5963   | 0.831988 | 3.120598 | 0.001805  | 0.005338  | 2.168345 | 3.284471 | 2.782925 | 17.85702 | 17.11289 | 15.07469 |
| 17091 | USP26     | 3.369447 | 2.595375 | 1.749457 | 1.483531 | 0.137933  | 0.214555  | 0.542086 | 2.189647 | 0        | 8.928508 | 8.556443 | 0        |
| 254   | STING1    | 523.1641 | 2.595197 | 0.141776 | 18.30487 | 7.57E-75  | 7.92E-73  | 155.5788 | 144.5167 | 146.1036 | 910.7078 | 836.3923 | 945.6857 |
| 16290 | LOC119621 | 2.882462 | 2.594092 | 1.612572 | 1.608667 | 0.107689  | 0.175747  | 0        | 1.094824 | 1.391463 | 2.232127 | 8.556443 | 4.019918 |
| 18873 | KLRC2     | 1.475248 | 2.593493 | 2.147034 | 1.207942 | 0.22707   | 0.319856  | 0        | 0.547412 | 0.695731 | 4.464254 | 2.139111 | 1.004979 |
| 8569  | MYO7B     | 18.05516 | 2.592631 | 0.800925 | 3.237047 | 0.001208  | 0.003747  | 1.084173 | 2.737059 | 11.82743 | 26.78552 | 42.78221 | 23.11453 |
| 11577 | LOC103235 | 6.207084 | 2.592066 | 1.036843 | 2.49996  | 0.012421  | 0.028523  | 1.626259 | 2.189647 | 1.391463 | 11.16063 | 12.83466 | 8.039836 |
| 14792 | RHO       | 4.108881 | 2.590434 | 1.381936 | 1.874497 | 0.060862  | 0.109385  | 0.542086 | 2.189647 | 0.695731 | 2.232127 | 14.97377 | 4.019918 |
| 16285 | OPN4      | 3.980922 | 2.590429 | 1.608539 | 1.610423 | 0.107305  | 0.175174  | 0        | 0        | 3.478657 | 6.696381 | 10.69555 | 3.014938 |
| 11991 | OVOL2     | 8.305851 | 2.590302 | 1.075578 | 2.408288 | 0.016028  | 0.035534  | 1.084173 | 0.547412 | 5.565851 | 8.928508 | 25.66933 | 8.039836 |
| 16240 | LOC119621 | 2.934993 | 2.590298 | 1.60031  | 1.618623 | 0.105528  | 0.172761  | 0        | 1.094824 | 1.391463 | 6.696381 | 6.417332 | 2.009959 |
| 17616 | LOC103246 | 3.219963 | 2.589942 | 1.848235 | 1.401305 | 0.161123  | 0.24309   | 0        | 0        | 2.782925 | 13.39276 | 2.139111 | 1.004979 |
| 16573 | LOC119621 | 2.866072 | 2.588862 | 1.65732  | 1.562077 | 0.11827   | 0.189718  | 0.542086 | 0.547412 | 1.391463 | 0        | 10.69555 | 4.019918 |
| 9796  | LOC103246 | 9.161827 | 2.588526 | 0.890964 | 2.905308 | 0.003669  | 0.009957  | 2.710432 | 2.189647 | 2.782925 | 17.85702 | 21.39111 | 8.039836 |
| 7349  | MAB21L2   | 26.96972 | 2.585473 | 0.714966 | 3.616216 | 0.000299  | 0.001081  | 4.336691 | 1.642235 | 17.39328 | 62.49956 | 42.78221 | 33.16432 |
| 8219  | EPHA8     | 15.9793  | 2.584522 | 0.773527 | 3.341217 | 0.000834  | 0.002698  | 7.047123 | 2.189647 | 4.174388 | 46.87467 | 23.53022 | 12.05975 |
| 11299 | LOC119621 | 8.175646 | 2.584508 | 1.00987  | 2.559248 | 0.01049   | 0.024681  | 1.084173 | 1.094824 | 4.87012  | 17.85702 | 17.11289 | 7.034856 |
| 13152 | LOC119618 | 5.039219 | 2.582764 | 1.184606 | 2.180272 | 0.029237  | 0.059099  | 1.084173 | 1.094824 | 2.087194 | 13.39276 | 8.556443 | 4.019918 |
| 7277  | GIMAP6    | 15.68038 | 2.582556 | 0.709383 | 3.640567 | 0.000272  | 0.000994  | 3.252518 | 3.831883 | 6.261582 | 35.71403 | 29.94755 | 15.07469 |
| 14984 | CUNH8orf  | 4.363733 | 2.582039 | 1.405507 | 1.837087 | 0.066197  | 0.117449  | 0        | 1.642235 | 2.087194 | 4.464254 | 14.97377 | 3.014938 |
| 9426  | PDE6B     | 18.03788 | 2.581935 | 0.860247 | 3.001389 | 0.002688  | 0.00758   | 1.084173 | 1.642235 | 13.2189  | 17.85702 | 34.22577 | 40.19918 |
| 15783 | LOC119624 | 3.347035 | 2.581679 | 1.514311 | 1.704854 | 0.088222  | 0.148601  | 1.084173 | 1.642235 | 0        | 8.928508 | 6.417332 | 2.009959 |
| 12280 | LOC119621 | 8.424475 | 2.581655 | 1.098926 | 2.349252 | 0.018811  | 0.040721  | 0.542086 | 0.547412 | 6.261582 | 22.32127 | 12.83466 | 8.039836 |
| 12655 | LOC103246 | 6.096628 | 2.579473 | 1.136544 | 2.269576 | 0.023233  | 0.048807  | 2.710432 | 1.642235 | 0.695731 | 20.08914 | 6.417332 | 5.024897 |
| 26586 | LOC119621 | 0.372021 | 2.579362 | 4.067274 | 0.634175 | 0.525967  | NA        | 0        | 0        | 0        | 2.232127 | 0        | 0        |
| 26596 | LOC119621 | 0.356518 | 2.579362 | 4.067274 | 0.634175 | 0.525967  | NA        | 0        | 0        | 0        | 0        | 2.139111 | 0        |
| 26597 | LOC119621 | 0.356518 | 2.579362 | 4.067274 | 0.634175 | 0.525967  | NA        | 0        | 0        | 0        | 0        | 2.139111 | 0        |
| 26604 | LOC119621 | 0.356518 | 2.579362 | 4.067274 | 0.634175 | 0.525967  | NA        | 0        | 0        | 0        | 0        | 2.139111 | 0        |
| 26607 | LOC119621 | 0.372021 | 2.5      |          |          |           |           |          |          |          |          |          |          |



|       |           |          |          |          |          |          |    |   |   |   |          |          |   |
|-------|-----------|----------|----------|----------|----------|----------|----|---|---|---|----------|----------|---|
| 26627 | LOC119621 | 0.372021 | 2.579362 | 4.067274 | 0.634175 | 0.525967 | NA | 0 | 0 | 0 | 2.232127 | 0        | 0 |
| 26628 | LOC119621 | 0.356518 | 2.579362 | 4.067274 | 0.634175 | 0.525967 | NA | 0 | 0 | 0 | 0        | 2.139111 | 0 |
| 26633 | UBE2U     | 0.356518 | 2.579362 | 4.067274 | 0.634175 | 0.525967 | NA | 0 | 0 | 0 | 0        | 2.139111 | 0 |
| 26667 | LOC103241 | 0.356518 | 2.579362 | 4.067274 | 0.634175 | 0.525967 | NA | 0 | 0 | 0 | 0        | 2.139111 | 0 |
| 26671 | LOC119611 | 0.356518 | 2.579362 | 4.067274 | 0.634175 | 0.525967 | NA | 0 | 0 | 0 | 0        | 2.139111 | 0 |
| 26675 | LOC119611 | 0.356518 | 2.579362 | 4.067274 | 0.634175 | 0.525967 | NA | 0 | 0 | 0 | 0        | 2.139111 | 0 |
| 26689 | LOC119611 | 0.372021 | 2.579362 | 4.067274 | 0.634175 | 0.525967 | NA | 0 | 0 | 0 | 2.232127 | 0        | 0 |
| 26699 | IL13      | 0.372021 | 2.579362 | 4.067274 | 0.634175 | 0.525967 | NA | 0 | 0 | 0 | 2.232127 | 0        | 0 |
| 26702 | MINAR2    | 0.356518 | 2.579362 | 4.067274 | 0.634175 | 0.525967 | NA | 0 | 0 | 0 | 0        | 2.139111 | 0 |
| 26704 | LOC119611 | 0.356518 | 2.579362 | 4.067274 | 0.634175 | 0.525967 | NA | 0 | 0 | 0 | 0        | 2.139111 | 0 |
| 26708 | FTMT      | 0.356518 | 2.579362 | 4.067274 | 0.634175 | 0.525967 | NA | 0 | 0 | 0 | 0        | 2.139111 | 0 |
| 26709 | LOC119621 | 0.356518 | 2.579362 | 4.067274 | 0.634175 | 0.525967 | NA | 0 | 0 | 0 | 0        | 2.139111 | 0 |
| 26713 | LOC119611 | 0.356518 | 2.579362 | 4.067274 | 0.634175 | 0.525967 | NA | 0 | 0 | 0 | 0        | 2.139111 | 0 |
| 26717 | LOC119621 | 0.372021 | 2.579362 | 4.067274 | 0.634175 | 0.525967 | NA | 0 | 0 | 0 | 2.232127 | 0        | 0 |
| 26718 | LOC119611 | 0.372021 | 2.579362 | 4.067274 | 0.634175 | 0.525967 | NA | 0 | 0 | 0 | 2.232127 | 0        | 0 |
| 26721 | LOC103211 | 0.372021 | 2.579362 | 4.067274 | 0.634175 | 0.525967 | NA | 0 | 0 | 0 | 2.232127 | 0        | 0 |
| 26722 | LOC103211 | 0.372021 | 2.579362 | 4.067274 | 0.634175 | 0.525967 | NA | 0 | 0 | 0 | 2.232127 | 0        | 0 |
| 26726 | LOC119611 | 0.372021 | 2.579362 | 4.067274 | 0.634175 | 0.525967 | NA | 0 | 0 | 0 | 2.232127 | 0        | 0 |
| 26739 | LOC119611 | 0.372021 | 2.579362 | 4.067274 | 0.634175 | 0.525967 | NA | 0 | 0 | 0 | 2.232127 | 0        | 0 |
| 26741 | LOC119611 | 0.356518 | 2.579362 | 4.067274 | 0.634175 | 0.525967 | NA | 0 | 0 | 0 | 0        | 2.139111 | 0 |
| 26776 | LOC119621 | 0.356518 | 2.579362 | 4.067274 | 0.634175 | 0.525967 | NA | 0 | 0 | 0 | 0        | 2.139111 | 0 |
| 26778 | LOC119621 | 0.372021 | 2.579362 | 4.067274 | 0.634175 | 0.525967 | NA | 0 | 0 | 0 | 2.232127 | 0        | 0 |
| 26783 | LOC119621 | 0.356518 | 2.579362 | 4.067274 | 0.634175 | 0.525967 | NA | 0 | 0 | 0 | 0        | 2.139111 | 0 |
| 26792 | LOC119621 | 0.356518 | 2.579362 | 4.067274 | 0.634175 | 0.525967 | NA | 0 | 0 | 0 | 0        | 2.139111 | 0 |
| 26801 | LOC119621 | 0.372021 | 2.579362 | 4.067274 | 0.634175 | 0.525967 | NA | 0 | 0 | 0 | 2.232127 | 0        | 0 |
| 26805 | LOC119621 | 0.356518 | 2.579362 | 4.067274 | 0.634175 | 0.525967 | NA | 0 | 0 | 0 | 0        | 2.139111 | 0 |
| 26814 | LOC119621 | 0.356518 | 2.579362 | 4.067274 | 0.634175 | 0.525967 | NA | 0 | 0 | 0 | 0        | 2.139111 | 0 |
| 26825 | LOC119621 | 0.356518 | 2.579362 | 4.067274 | 0.634175 | 0.525967 | NA | 0 | 0 | 0 | 0        | 2.139111 | 0 |
| 26828 | LOC119621 | 0.356518 | 2.579362 | 4.067274 | 0.634175 | 0.525967 | NA | 0 | 0 | 0 | 0        | 2.139111 | 0 |
| 26840 | LOC119621 | 0.372021 | 2.579362 | 4.067274 | 0.634175 | 0.525967 | NA | 0 | 0 | 0 | 2.232127 | 0        | 0 |
| 26851 | LOC103231 | 0.356518 | 2.579362 | 4.067274 | 0.634175 | 0.525967 | NA | 0 | 0 | 0 | 0        | 2.139111 | 0 |
| 26854 | LOC119621 | 0.356518 | 2.579362 | 4.067274 | 0.634175 | 0.525967 | NA | 0 | 0 | 0 | 0        | 2.139111 | 0 |
| 26855 | LOC119621 | 0.372021 | 2.579362 | 4.067274 | 0.634175 | 0.525967 | NA | 0 | 0 | 0 | 2.232127 | 0        | 0 |
| 26859 | LOC119621 | 0.356518 | 2.579362 | 4.067274 | 0.634175 | 0.525967 | NA | 0 | 0 | 0 | 0        | 2.139111 | 0 |
| 26862 | LOC119621 | 0.372021 | 2.579362 | 4.067274 | 0.634175 | 0.525967 | NA | 0 | 0 | 0 | 2.232127 | 0        | 0 |
| 26863 | LOC119621 | 0.372021 | 2.579362 | 4.067274 | 0.634175 | 0.525967 | NA | 0 | 0 | 0 | 2.232127 | 0        | 0 |
| 26869 | LOC119621 | 0.372021 | 2.579362 | 4.067274 | 0.634175 | 0.525967 | NA | 0 | 0 | 0 | 2.232127 | 0        | 0 |
| 26878 | LOC119621 | 0.372021 | 2.579362 | 4.067274 | 0.634175 | 0.525967 | NA | 0 | 0 | 0 | 2.232127 | 0        | 0 |
| 26883 | LOC103231 | 0.356518 | 2.579362 | 4.067274 | 0.634175 | 0.525967 | NA | 0 | 0 | 0 | 0        | 2.139111 | 0 |
| 26884 | LOC103231 | 0.372021 | 2.579362 | 4.067274 | 0.634175 | 0.525967 | NA | 0 | 0 | 0 | 2.232127 | 0        | 0 |
| 26889 | LOC103231 | 0.372021 | 2.579362 | 4.067274 | 0.634175 | 0.525967 | NA | 0 | 0 | 0 | 2.232127 | 0        | 0 |
| 26898 | LOC103231 | 0.356518 | 2.579362 | 4.067274 | 0.634175 | 0.525967 | NA | 0 | 0 | 0 | 0        | 2.139111 | 0 |
| 26902 | LOC119621 | 0.356518 | 2.579362 | 4.067274 | 0.634175 | 0.525967 | NA | 0 | 0 | 0 | 0        | 2.139111 | 0 |
| 26908 | LOC103231 | 0.372021 | 2.579362 | 4.067274 | 0.634175 | 0.525967 | NA | 0 | 0 | 0 | 2.232127 | 0        | 0 |
| 26913 | LOC103221 | 0.372021 | 2.579362 | 4.067274 | 0.634175 | 0.525967 | NA | 0 | 0 | 0 | 2.232127 | 0        | 0 |
| 26915 | LOC103221 | 0.356518 | 2.579362 | 4.067274 | 0.634175 | 0.525967 | NA | 0 | 0 | 0 | 0        | 2.139111 | 0 |
| 26917 | LOC103221 | 0.356518 | 2.579362 | 4.067274 | 0.634175 | 0.525967 | NA | 0 | 0 | 0 | 0        | 2.139111 | 0 |
| 26918 | LOC103221 | 0.356518 | 2.579362 | 4.067274 | 0.634175 | 0.525967 | NA | 0 | 0 | 0 | 0        | 2.139111 | 0 |
| 26919 | LOC103221 | 0.372021 | 2.579362 | 4.067274 | 0.634175 | 0.525967 | NA | 0 | 0 | 0 | 2.232127 | 0        | 0 |
| 26922 | LOC103221 | 0.356518 | 2.579362 | 4.067274 | 0.634175 | 0.525967 | NA | 0 | 0 | 0 | 0        | 2.139111 | 0 |
| 26932 | LOC119621 | 0.356518 | 2.579362 | 4.067274 | 0.634175 | 0.525967 | NA | 0 | 0 | 0 | 0        | 2.139111 | 0 |
| 26934 | LOC119621 | 0.356518 | 2.579362 | 4.067274 | 0.634175 | 0.525967 | NA | 0 | 0 | 0 | 0        | 2.139111 | 0 |
| 26935 | LOC103221 | 0.356518 | 2.579362 | 4.067274 | 0.634175 | 0.525967 | NA | 0 | 0 | 0 | 0        | 2.139111 | 0 |
| 26942 | CUNH1orf1 | 0.372021 | 2.579362 | 4.067274 | 0.634175 | 0.525967 | NA | 0 | 0 | 0 | 2.232127 | 0        | 0 |
| 26945 | LOC103221 | 0.356518 | 2.579362 | 4.067274 | 0.634175 | 0.525967 | NA | 0 | 0 | 0 | 0        | 2.139111 | 0 |
| 26948 | LOC119621 | 0.372021 | 2.579362 | 4.067274 | 0.634175 | 0.525967 | NA | 0 | 0 | 0 | 2.232127 | 0        | 0 |
| 26963 | LOC119621 | 0.372021 | 2.579362 | 4.067274 | 0.634175 | 0.525967 | NA | 0 | 0 | 0 | 2.232127 | 0        | 0 |
| 26968 | LOC119621 | 0.356518 | 2.579362 | 4.067274 | 0.634175 | 0.525967 | NA | 0 | 0 | 0 | 0        | 2.139111 | 0 |
| 26970 | LOC103221 | 0.356518 | 2.579362 | 4.067274 | 0.634175 | 0.525967 | NA | 0 | 0 | 0 | 0        | 2.139111 | 0 |
| 26975 | LOC119621 | 0.356518 | 2.579362 | 4.067274 | 0.634175 | 0.525967 | NA | 0 | 0 | 0 | 0        | 2.139111 | 0 |
| 26977 | LOC119621 | 0.356518 | 2.579362 | 4.067274 | 0.634175 | 0.525967 | NA | 0 | 0 | 0 | 0        | 2.139111 | 0 |
| 26982 | LOC103211 | 0.372021 | 2.579362 | 4.067274 | 0.634175 | 0.525967 | NA | 0 | 0 | 0 | 2.232127 | 0        | 0 |
| 26984 | LOC103211 | 0.356518 | 2.579362 | 4.067274 | 0.634175 | 0.525967 | NA | 0 | 0 | 0 | 0        | 2.139111 | 0 |
| 26995 | LOC119621 | 0.356518 | 2.579362 | 4.067274 | 0.634175 | 0.525967 | NA | 0 | 0 | 0 | 0        | 2.139111 | 0 |
| 27005 | LOC119621 | 0.372021 | 2.579362 | 4.067274 | 0.634175 | 0.525967 | NA | 0 | 0 | 0 | 2.232127 | 0        | 0 |
| 27008 | LOC119621 | 0.372021 | 2.579362 | 4.067274 | 0.634175 | 0.525967 | NA | 0 | 0 | 0 | 2.232127 | 0        | 0 |
| 27010 | TRNAK-CU  | 0.356518 | 2.579362 | 4.067274 | 0.634175 | 0.525967 | NA | 0 | 0 | 0 | 0        | 2.139111 | 0 |
| 27022 | ODF3      | 0.356518 | 2.579362 | 4.067274 | 0.634175 | 0.525967 | NA | 0 | 0 | 0 | 0        | 2.139111 | 0 |
| 27027 | LOC119621 | 0.356518 | 2.579362 | 4.067274 | 0.634175 | 0.525967 | NA | 0 | 0 | 0 | 0        | 2.139111 | 0 |
| 27029 | LOC119621 | 0.356518 | 2.579362 | 4.067274 | 0.634175 | 0.525967 | NA | 0 | 0 | 0 | 0        | 2.139111 | 0 |
| 27052 | LOC103231 | 0.372021 | 2.579362 | 4.067274 | 0.634175 | 0.525967 | NA | 0 | 0 | 0 | 2.232127 | 0        | 0 |
| 27059 | LOC103231 | 0.356518 | 2.579362 | 4.067274 | 0.634175 | 0.525967 | NA | 0 | 0 | 0 | 0        | 2.139111 | 0 |
| 27064 | LOC103231 | 0.356518 | 2.579362 | 4.067274 | 0.634175 | 0.525967 | NA | 0 | 0 | 0 | 0        | 2.139111 | 0 |
| 27066 | LOC103231 | 0.356518 | 2.579362 | 4.067274 | 0.634175 | 0.525967 | NA | 0 | 0 | 0 | 0        | 2.139111 | 0 |



|       |           |          |          |          |          |          |    |   |   |   |          |          |   |
|-------|-----------|----------|----------|----------|----------|----------|----|---|---|---|----------|----------|---|
| 27068 | LOC103231 | 0.356518 | 2.579362 | 4.067274 | 0.634175 | 0.525967 | NA | 0 | 0 | 0 | 0        | 2.139111 | 0 |
| 27073 | LOC119624 | 0.356518 | 2.579362 | 4.067274 | 0.634175 | 0.525967 | NA | 0 | 0 | 0 | 0        | 2.139111 | 0 |
| 27076 | LOC103231 | 0.372021 | 2.579362 | 4.067274 | 0.634175 | 0.525967 | NA | 0 | 0 | 0 | 2.232127 | 0        | 0 |
| 27079 | LOC103231 | 0.356518 | 2.579362 | 4.067274 | 0.634175 | 0.525967 | NA | 0 | 0 | 0 | 0        | 2.139111 | 0 |
| 27084 | LOC103231 | 0.372021 | 2.579362 | 4.067274 | 0.634175 | 0.525967 | NA | 0 | 0 | 0 | 2.232127 | 0        | 0 |
| 27096 | LOC119624 | 0.372021 | 2.579362 | 4.067274 | 0.634175 | 0.525967 | NA | 0 | 0 | 0 | 2.232127 | 0        | 0 |
| 27104 | ASCL3     | 0.372021 | 2.579362 | 4.067274 | 0.634175 | 0.525967 | NA | 0 | 0 | 0 | 2.232127 | 0        | 0 |
| 27110 | LOC103241 | 0.356518 | 2.579362 | 4.067274 | 0.634175 | 0.525967 | NA | 0 | 0 | 0 | 0        | 2.139111 | 0 |
| 27116 | LOC103241 | 0.356518 | 2.579362 | 4.067274 | 0.634175 | 0.525967 | NA | 0 | 0 | 0 | 0        | 2.139111 | 0 |
| 27117 | LOC119624 | 0.372021 | 2.579362 | 4.067274 | 0.634175 | 0.525967 | NA | 0 | 0 | 0 | 2.232127 | 0        | 0 |
| 27130 | LOC119624 | 0.372021 | 2.579362 | 4.067274 | 0.634175 | 0.525967 | NA | 0 | 0 | 0 | 2.232127 | 0        | 0 |
| 27133 | LOC119624 | 0.372021 | 2.579362 | 4.067274 | 0.634175 | 0.525967 | NA | 0 | 0 | 0 | 2.232127 | 0        | 0 |
| 27160 | LOC119624 | 0.372021 | 2.579362 | 4.067274 | 0.634175 | 0.525967 | NA | 0 | 0 | 0 | 2.232127 | 0        | 0 |
| 27161 | LOC119624 | 0.372021 | 2.579362 | 4.067274 | 0.634175 | 0.525967 | NA | 0 | 0 | 0 | 2.232127 | 0        | 0 |
| 27170 | LOC119624 | 0.372021 | 2.579362 | 4.067274 | 0.634175 | 0.525967 | NA | 0 | 0 | 0 | 2.232127 | 0        | 0 |
| 27174 | LOC119624 | 0.356518 | 2.579362 | 4.067274 | 0.634175 | 0.525967 | NA | 0 | 0 | 0 | 0        | 2.139111 | 0 |
| 27176 | LOC103231 | 0.356518 | 2.579362 | 4.067274 | 0.634175 | 0.525967 | NA | 0 | 0 | 0 | 0        | 2.139111 | 0 |
| 27182 | LOC119624 | 0.372021 | 2.579362 | 4.067274 | 0.634175 | 0.525967 | NA | 0 | 0 | 0 | 2.232127 | 0        | 0 |
| 27190 | TAAR3     | 0.372021 | 2.579362 | 4.067274 | 0.634175 | 0.525967 | NA | 0 | 0 | 0 | 2.232127 | 0        | 0 |
| 27197 | LOC119624 | 0.372021 | 2.579362 | 4.067274 | 0.634175 | 0.525967 | NA | 0 | 0 | 0 | 2.232127 | 0        | 0 |
| 27202 | LOC119624 | 0.356518 | 2.579362 | 4.067274 | 0.634175 | 0.525967 | NA | 0 | 0 | 0 | 0        | 2.139111 | 0 |
| 27209 | LOC119624 | 0.356518 | 2.579362 | 4.067274 | 0.634175 | 0.525967 | NA | 0 | 0 | 0 | 0        | 2.139111 | 0 |
| 27221 | LOC119624 | 0.356518 | 2.579362 | 4.067274 | 0.634175 | 0.525967 | NA | 0 | 0 | 0 | 0        | 2.139111 | 0 |
| 27222 | LOC119624 | 0.356518 | 2.579362 | 4.067274 | 0.634175 | 0.525967 | NA | 0 | 0 | 0 | 0        | 2.139111 | 0 |
| 27232 | LOC103241 | 0.372021 | 2.579362 | 4.067274 | 0.634175 | 0.525967 | NA | 0 | 0 | 0 | 2.232127 | 0        | 0 |
| 27250 | TEX44     | 0.356518 | 2.579362 | 4.067274 | 0.634175 | 0.525967 | NA | 0 | 0 | 0 | 0        | 2.139111 | 0 |
| 27260 | LOC119624 | 0.356518 | 2.579362 | 4.067274 | 0.634175 | 0.525967 | NA | 0 | 0 | 0 | 0        | 2.139111 | 0 |
| 27262 | LOC119624 | 0.356518 | 2.579362 | 4.067274 | 0.634175 | 0.525967 | NA | 0 | 0 | 0 | 0        | 2.139111 | 0 |
| 27299 | LOC119624 | 0.372021 | 2.579362 | 4.067274 | 0.634175 | 0.525967 | NA | 0 | 0 | 0 | 2.232127 | 0        | 0 |
| 27310 | LOC119624 | 0.372021 | 2.579362 | 4.067274 | 0.634175 | 0.525967 | NA | 0 | 0 | 0 | 2.232127 | 0        | 0 |
| 27326 | LOC119624 | 0.356518 | 2.579362 | 4.067274 | 0.634175 | 0.525967 | NA | 0 | 0 | 0 | 0        | 2.139111 | 0 |
| 27330 | MEI4      | 0.356518 | 2.579362 | 4.067274 | 0.634175 | 0.525967 | NA | 0 | 0 | 0 | 0        | 2.139111 | 0 |
| 27334 | LOC119624 | 0.372021 | 2.579362 | 4.067274 | 0.634175 | 0.525967 | NA | 0 | 0 | 0 | 2.232127 | 0        | 0 |
| 27337 | CGA       | 0.372021 | 2.579362 | 4.067274 | 0.634175 | 0.525967 | NA | 0 | 0 | 0 | 2.232127 | 0        | 0 |
| 27343 | LOC119624 | 0.356518 | 2.579362 | 4.067274 | 0.634175 | 0.525967 | NA | 0 | 0 | 0 | 0        | 2.139111 | 0 |
| 27350 | LOC119624 | 0.356518 | 2.579362 | 4.067274 | 0.634175 | 0.525967 | NA | 0 | 0 | 0 | 0        | 2.139111 | 0 |
| 27355 | LOC119624 | 0.372021 | 2.579362 | 4.067274 | 0.634175 | 0.525967 | NA | 0 | 0 | 0 | 2.232127 | 0        | 0 |
| 27362 | TRNAC-GC  | 0.372021 | 2.579362 | 4.067274 | 0.634175 | 0.525967 | NA | 0 | 0 | 0 | 2.232127 | 0        | 0 |
| 27365 | LOC119624 | 0.356518 | 2.579362 | 4.067274 | 0.634175 | 0.525967 | NA | 0 | 0 | 0 | 0        | 2.139111 | 0 |
| 27366 | LOC119624 | 0.356518 | 2.579362 | 4.067274 | 0.634175 | 0.525967 | NA | 0 | 0 | 0 | 0        | 2.139111 | 0 |
| 27371 | LOC119624 | 0.356518 | 2.579362 | 4.067274 | 0.634175 | 0.525967 | NA | 0 | 0 | 0 | 0        | 2.139111 | 0 |
| 27382 | LOC119624 | 0.372021 | 2.579362 | 4.067274 | 0.634175 | 0.525967 | NA | 0 | 0 | 0 | 2.232127 | 0        | 0 |
| 27385 | LOC119624 | 0.372021 | 2.579362 | 4.067274 | 0.634175 | 0.525967 | NA | 0 | 0 | 0 | 2.232127 | 0        | 0 |
| 27387 | LOC119624 | 0.356518 | 2.579362 | 4.067274 | 0.634175 | 0.525967 | NA | 0 | 0 | 0 | 0        | 2.139111 | 0 |
| 27397 | LOC119624 | 0.356518 | 2.579362 | 4.067274 | 0.634175 | 0.525967 | NA | 0 | 0 | 0 | 0        | 2.139111 | 0 |
| 27405 | LOC119624 | 0.356518 | 2.579362 | 4.067274 | 0.634175 | 0.525967 | NA | 0 | 0 | 0 | 0        | 2.139111 | 0 |
| 27413 | LOC119624 | 0.356518 | 2.579362 | 4.067274 | 0.634175 | 0.525967 | NA | 0 | 0 | 0 | 0        | 2.139111 | 0 |
| 27425 | LOC119624 | 0.356518 | 2.579362 | 4.067274 | 0.634175 | 0.525967 | NA | 0 | 0 | 0 | 0        | 2.139111 | 0 |
| 27432 | LOC119624 | 0.356518 | 2.579362 | 4.067274 | 0.634175 | 0.525967 | NA | 0 | 0 | 0 | 0        | 2.139111 | 0 |
| 27436 | LOC119624 | 0.356518 | 2.579362 | 4.067274 | 0.634175 | 0.525967 | NA | 0 | 0 | 0 | 0        | 2.139111 | 0 |
| 27448 | LOC119624 | 0.356518 | 2.579362 | 4.067274 | 0.634175 | 0.525967 | NA | 0 | 0 | 0 | 0        | 2.139111 | 0 |
| 27453 | LOC119624 | 0.356518 | 2.579362 | 4.067274 | 0.634175 | 0.525967 | NA | 0 | 0 | 0 | 0        | 2.139111 | 0 |
| 27467 | SULT1C3   | 0.356518 | 2.579362 | 4.067274 | 0.634175 | 0.525967 | NA | 0 | 0 | 0 | 0        | 2.139111 | 0 |
| 27468 | LOC119624 | 0.372021 | 2.579362 | 4.067274 | 0.634175 | 0.525967 | NA | 0 | 0 | 0 | 2.232127 | 0        | 0 |
| 27473 | LOC119624 | 0.356518 | 2.579362 | 4.067274 | 0.634175 | 0.525967 | NA | 0 | 0 | 0 | 0        | 2.139111 | 0 |
| 27483 | LOC103221 | 0.356518 | 2.579362 | 4.067274 | 0.634175 | 0.525967 | NA | 0 | 0 | 0 | 0        | 2.139111 | 0 |
| 27490 | EFCAB10   | 0.372021 | 2.579362 | 4.067274 | 0.634175 | 0.525967 | NA | 0 | 0 | 0 | 2.232127 | 0        | 0 |
| 27491 | LOC119624 | 0.372021 | 2.579362 | 4.067274 | 0.634175 | 0.525967 | NA | 0 | 0 | 0 | 2.232127 | 0        | 0 |
| 27492 | LOC119624 | 0.356518 | 2.579362 | 4.067274 | 0.634175 | 0.525967 | NA | 0 | 0 | 0 | 0        | 2.139111 | 0 |
| 27505 | LOC119624 | 0.356518 | 2.579362 | 4.067274 | 0.634175 | 0.525967 | NA | 0 | 0 | 0 | 0        | 2.139111 | 0 |
| 27509 | LOC119624 | 0.372021 | 2.579362 | 4.067274 | 0.634175 | 0.525967 | NA | 0 | 0 | 0 | 2.232127 | 0        | 0 |
| 27517 | NPY       | 0.356518 | 2.579362 | 4.067274 | 0.634175 | 0.525967 | NA | 0 | 0 | 0 | 0        | 2.139111 | 0 |
| 27519 | LOC119624 | 0.372021 | 2.579362 | 4.067274 | 0.634175 | 0.525967 | NA | 0 | 0 | 0 | 2.232127 | 0        | 0 |
| 27520 | LINC02860 | 0.356518 | 2.579362 | 4.067274 | 0.634175 | 0.525967 | NA | 0 | 0 | 0 | 0        | 2.139111 | 0 |
| 27537 | LOC103241 | 0.356518 | 2.579362 | 4.067274 | 0.634175 | 0.525967 | NA | 0 | 0 | 0 | 0        | 2.139111 | 0 |
| 27539 | LOC103241 | 0.356518 | 2.579362 | 4.067274 | 0.634175 | 0.525967 | NA | 0 | 0 | 0 | 0        | 2.139111 | 0 |
| 27542 | LOC103241 | 0.372021 | 2.579362 | 4.067274 | 0.634175 | 0.525967 | NA | 0 | 0 | 0 | 2.232127 | 0        | 0 |
| 27572 | LOC103241 | 0.356518 | 2.579362 | 4.067274 | 0.634175 | 0.525967 | NA | 0 | 0 | 0 | 0        | 2.139111 | 0 |
| 27575 | LOC103241 | 0.356518 | 2.579362 | 4.067274 | 0.634175 | 0.525967 | NA | 0 | 0 | 0 | 0        | 2.139111 | 0 |
| 27576 | LOC103241 | 0.372021 | 2.579362 | 4.067274 | 0.634175 | 0.525967 | NA | 0 | 0 | 0 | 2.232127 | 0        | 0 |
| 27578 | LOC103241 | 0.372021 | 2.579362 | 4.067274 | 0.634175 | 0.525967 | NA | 0 | 0 | 0 | 2.232127 | 0        | 0 |
| 27586 | LOC103241 | 0.356518 | 2.579362 | 4.067274 | 0.634175 | 0.525967 | NA | 0 | 0 | 0 | 0        | 2.139111 | 0 |
| 27587 | LOC103241 | 0.372021 | 2.579362 | 4.067274 | 0.634175 | 0.525967 | NA | 0 | 0 | 0 | 2.232127 | 0        | 0 |
| 27588 | LOC103241 | 0.372021 | 2.579362 | 4.067274 | 0.634175 | 0.525967 | NA | 0 | 0 | 0 | 2.232127 | 0        | 0 |



|       |           |          |          |          |          |          |    |   |   |   |          |          |   |
|-------|-----------|----------|----------|----------|----------|----------|----|---|---|---|----------|----------|---|
| 27595 | LOC10324: | 0.356518 | 2.579362 | 4.067274 | 0.634175 | 0.525967 | NA | 0 | 0 | 0 | 0        | 2.139111 | 0 |
| 27604 | LOC10324: | 0.372021 | 2.579362 | 4.067274 | 0.634175 | 0.525967 | NA | 0 | 0 | 0 | 2.232127 | 0        | 0 |
| 27611 | LOC11962: | 0.356518 | 2.579362 | 4.067274 | 0.634175 | 0.525967 | NA | 0 | 0 | 0 | 0        | 2.139111 | 0 |
| 27621 | LOC11962: | 0.372021 | 2.579362 | 4.067274 | 0.634175 | 0.525967 | NA | 0 | 0 | 0 | 2.232127 | 0        | 0 |
| 27623 | LOC11962: | 0.356518 | 2.579362 | 4.067274 | 0.634175 | 0.525967 | NA | 0 | 0 | 0 | 0        | 2.139111 | 0 |
| 27627 | LOC11962: | 0.372021 | 2.579362 | 4.067274 | 0.634175 | 0.525967 | NA | 0 | 0 | 0 | 2.232127 | 0        | 0 |
| 27657 | LOC11962: | 0.372021 | 2.579362 | 4.067274 | 0.634175 | 0.525967 | NA | 0 | 0 | 0 | 2.232127 | 0        | 0 |
| 27665 | LOC10322: | 0.356518 | 2.579362 | 4.067274 | 0.634175 | 0.525967 | NA | 0 | 0 | 0 | 0        | 2.139111 | 0 |
| 27678 | LOC11962: | 0.372021 | 2.579362 | 4.067274 | 0.634175 | 0.525967 | NA | 0 | 0 | 0 | 2.232127 | 0        | 0 |
| 27685 | LOC11962: | 0.356518 | 2.579362 | 4.067274 | 0.634175 | 0.525967 | NA | 0 | 0 | 0 | 0        | 2.139111 | 0 |
| 27686 | LOC10322: | 0.356518 | 2.579362 | 4.067274 | 0.634175 | 0.525967 | NA | 0 | 0 | 0 | 0        | 2.139111 | 0 |
| 27687 | LOC11962: | 0.372021 | 2.579362 | 4.067274 | 0.634175 | 0.525967 | NA | 0 | 0 | 0 | 2.232127 | 0        | 0 |
| 27692 | LOC11962: | 0.356518 | 2.579362 | 4.067274 | 0.634175 | 0.525967 | NA | 0 | 0 | 0 | 0        | 2.139111 | 0 |
| 27719 | LOC10322: | 0.356518 | 2.579362 | 4.067274 | 0.634175 | 0.525967 | NA | 0 | 0 | 0 | 0        | 2.139111 | 0 |
| 27729 | LOC11962: | 0.356518 | 2.579362 | 4.067274 | 0.634175 | 0.525967 | NA | 0 | 0 | 0 | 0        | 2.139111 | 0 |
| 27730 | LOC10322: | 0.372021 | 2.579362 | 4.067274 | 0.634175 | 0.525967 | NA | 0 | 0 | 0 | 2.232127 | 0        | 0 |
| 27736 | LOC11962: | 0.356518 | 2.579362 | 4.067274 | 0.634175 | 0.525967 | NA | 0 | 0 | 0 | 0        | 2.139111 | 0 |
| 27773 | LOC11962: | 0.372021 | 2.579362 | 4.067274 | 0.634175 | 0.525967 | NA | 0 | 0 | 0 | 2.232127 | 0        | 0 |
| 27777 | LOC11962: | 0.372021 | 2.579362 | 4.067274 | 0.634175 | 0.525967 | NA | 0 | 0 | 0 | 2.232127 | 0        | 0 |
| 27778 | LOC11962: | 0.372021 | 2.579362 | 4.067274 | 0.634175 | 0.525967 | NA | 0 | 0 | 0 | 2.232127 | 0        | 0 |
| 27785 | LOC11962: | 0.356518 | 2.579362 | 4.067274 | 0.634175 | 0.525967 | NA | 0 | 0 | 0 | 0        | 2.139111 | 0 |
| 27827 | LOC10321: | 0.356518 | 2.579362 | 4.067274 | 0.634175 | 0.525967 | NA | 0 | 0 | 0 | 0        | 2.139111 | 0 |
| 27833 | LOC11962: | 0.356518 | 2.579362 | 4.067274 | 0.634175 | 0.525967 | NA | 0 | 0 | 0 | 0        | 2.139111 | 0 |
| 27835 | LOC11962: | 0.372021 | 2.579362 | 4.067274 | 0.634175 | 0.525967 | NA | 0 | 0 | 0 | 2.232127 | 0        | 0 |
| 27843 | TRNAG-GC  | 0.356518 | 2.579362 | 4.067274 | 0.634175 | 0.525967 | NA | 0 | 0 | 0 | 0        | 2.139111 | 0 |
| 27851 | LOC11962: | 0.356518 | 2.579362 | 4.067274 | 0.634175 | 0.525967 | NA | 0 | 0 | 0 | 0        | 2.139111 | 0 |
| 27855 | LOC11962: | 0.372021 | 2.579362 | 4.067274 | 0.634175 | 0.525967 | NA | 0 | 0 | 0 | 2.232127 | 0        | 0 |
| 27858 | LOC11962: | 0.356518 | 2.579362 | 4.067274 | 0.634175 | 0.525967 | NA | 0 | 0 | 0 | 0        | 2.139111 | 0 |
| 27859 | CCL17     | 0.356518 | 2.579362 | 4.067274 | 0.634175 | 0.525967 | NA | 0 | 0 | 0 | 0        | 2.139111 | 0 |
| 27861 | LOC10323: | 0.372021 | 2.579362 | 4.067274 | 0.634175 | 0.525967 | NA | 0 | 0 | 0 | 2.232127 | 0        | 0 |
| 27863 | LOC10323: | 0.356518 | 2.579362 | 4.067274 | 0.634175 | 0.525967 | NA | 0 | 0 | 0 | 0        | 2.139111 | 0 |
| 27898 | LOC11962: | 0.356518 | 2.579362 | 4.067274 | 0.634175 | 0.525967 | NA | 0 | 0 | 0 | 0        | 2.139111 | 0 |
| 27910 | LOC11962: | 0.372021 | 2.579362 | 4.067274 | 0.634175 | 0.525967 | NA | 0 | 0 | 0 | 2.232127 | 0        | 0 |
| 27912 | LOC11962: | 0.356518 | 2.579362 | 4.067274 | 0.634175 | 0.525967 | NA | 0 | 0 | 0 | 0        | 2.139111 | 0 |
| 27940 | LOC11962: | 0.372021 | 2.579362 | 4.067274 | 0.634175 | 0.525967 | NA | 0 | 0 | 0 | 2.232127 | 0        | 0 |
| 27941 | LOC11962: | 0.372021 | 2.579362 | 4.067274 | 0.634175 | 0.525967 | NA | 0 | 0 | 0 | 2.232127 | 0        | 0 |
| 27943 | LOC11962: | 0.372021 | 2.579362 | 4.067274 | 0.634175 | 0.525967 | NA | 0 | 0 | 0 | 2.232127 | 0        | 0 |
| 27950 | LOC11962: | 0.372021 | 2.579362 | 4.067274 | 0.634175 | 0.525967 | NA | 0 | 0 | 0 | 2.232127 | 0        | 0 |
| 27955 | NPS       | 0.356518 | 2.579362 | 4.067274 | 0.634175 | 0.525967 | NA | 0 | 0 | 0 | 0        | 2.139111 | 0 |
| 27966 | LOC10324: | 0.356518 | 2.579362 | 4.067274 | 0.634175 | 0.525967 | NA | 0 | 0 | 0 | 0        | 2.139111 | 0 |
| 27967 | LOC11962: | 0.372021 | 2.579362 | 4.067274 | 0.634175 | 0.525967 | NA | 0 | 0 | 0 | 2.232127 | 0        | 0 |
| 27979 | LOC11962: | 0.356518 | 2.579362 | 4.067274 | 0.634175 | 0.525967 | NA | 0 | 0 | 0 | 0        | 2.139111 | 0 |
| 27980 | LOC11962: | 0.356518 | 2.579362 | 4.067274 | 0.634175 | 0.525967 | NA | 0 | 0 | 0 | 0        | 2.139111 | 0 |
| 27983 | LOC11962: | 0.372021 | 2.579362 | 4.067274 | 0.634175 | 0.525967 | NA | 0 | 0 | 0 | 2.232127 | 0        | 0 |
| 28003 | LOC11961: | 0.356518 | 2.579362 | 4.067274 | 0.634175 | 0.525967 | NA | 0 | 0 | 0 | 0        | 2.139111 | 0 |
| 28006 | LOC11961: | 0.356518 | 2.579362 | 4.067274 | 0.634175 | 0.525967 | NA | 0 | 0 | 0 | 0        | 2.139111 | 0 |
| 28009 | LOC11961: | 0.356518 | 2.579362 | 4.067274 | 0.634175 | 0.525967 | NA | 0 | 0 | 0 | 0        | 2.139111 | 0 |
| 28016 | LOC11961: | 0.372021 | 2.579362 | 4.067274 | 0.634175 | 0.525967 | NA | 0 | 0 | 0 | 2.232127 | 0        | 0 |
| 28031 | LOC11961: | 0.356518 | 2.579362 | 4.067274 | 0.634175 | 0.525967 | NA | 0 | 0 | 0 | 0        | 2.139111 | 0 |
| 28048 | LOC11961: | 0.356518 | 2.579362 | 4.067274 | 0.634175 | 0.525967 | NA | 0 | 0 | 0 | 0        | 2.139111 | 0 |
| 28055 | LOC11961: | 0.372021 | 2.579362 | 4.067274 | 0.634175 | 0.525967 | NA | 0 | 0 | 0 | 2.232127 | 0        | 0 |
| 28058 | LOC11961: | 0.372021 | 2.579362 | 4.067274 | 0.634175 | 0.525967 | NA | 0 | 0 | 0 | 2.232127 | 0        | 0 |
| 28059 | LOC10324: | 0.372021 | 2.579362 | 4.067274 | 0.634175 | 0.525967 | NA | 0 | 0 | 0 | 2.232127 | 0        | 0 |
| 28100 | LOC11961: | 0.372021 | 2.579362 | 4.067274 | 0.634175 | 0.525967 | NA | 0 | 0 | 0 | 2.232127 | 0        | 0 |
| 28104 | DEFB121   | 0.372021 | 2.579362 | 4.067274 | 0.634175 | 0.525967 | NA | 0 | 0 | 0 | 2.232127 | 0        | 0 |
| 28105 | LOC11961: | 0.356518 | 2.579362 | 4.067274 | 0.634175 | 0.525967 | NA | 0 | 0 | 0 | 0        | 2.139111 | 0 |
| 28108 | LOC11961: | 0.372021 | 2.579362 | 4.067274 | 0.634175 | 0.525967 | NA | 0 | 0 | 0 | 2.232127 | 0        | 0 |
| 28122 | LOC11961: | 0.356518 | 2.579362 | 4.067274 | 0.634175 | 0.525967 | NA | 0 | 0 | 0 | 0        | 2.139111 | 0 |
| 28124 | LOC11961: | 0.356518 | 2.579362 | 4.067274 | 0.634175 | 0.525967 | NA | 0 | 0 | 0 | 0        | 2.139111 | 0 |
| 28128 | LOC11961: | 0.372021 | 2.579362 | 4.067274 | 0.634175 | 0.525967 | NA | 0 | 0 | 0 | 2.232127 | 0        | 0 |
| 28129 | LOC10323: | 0.372021 | 2.579362 | 4.067274 | 0.634175 | 0.525967 | NA | 0 | 0 | 0 | 2.232127 | 0        | 0 |
| 28130 | LOC11961: | 0.372021 | 2.579362 | 4.067274 | 0.634175 | 0.525967 | NA | 0 | 0 | 0 | 2.232127 | 0        | 0 |
| 28132 | LOC11961: | 0.372021 | 2.579362 | 4.067274 | 0.634175 | 0.525967 | NA | 0 | 0 | 0 | 2.232127 | 0        | 0 |
| 28139 | LOC11961: | 0.372021 | 2.579362 | 4.067274 | 0.634175 | 0.525967 | NA | 0 | 0 | 0 | 2.232127 | 0        | 0 |
| 28146 | LOC11961: | 0.356518 | 2.579362 | 4.067274 | 0.634175 | 0.525967 | NA | 0 | 0 | 0 | 0        | 2.139111 | 0 |
| 28147 | LOC11961: | 0.356518 | 2.579362 | 4.067274 | 0.634175 | 0.525967 | NA | 0 | 0 | 0 | 0        | 2.139111 | 0 |
| 28165 | LOC11961: | 0.356518 | 2.579362 | 4.067274 | 0.634175 | 0.525967 | NA | 0 | 0 | 0 | 0        | 2.139111 | 0 |
| 28166 | LOC11961: | 0.356518 | 2.579362 | 4.067274 | 0.634175 | 0.525967 | NA | 0 | 0 | 0 | 0        | 2.139111 | 0 |
| 28168 | LOC10321: | 0.356518 | 2.579362 | 4.067274 | 0.634175 | 0.525967 | NA | 0 | 0 | 0 | 0        | 2.139111 | 0 |
| 28169 | LOC11961: | 0.356518 | 2.579362 | 4.067274 | 0.634175 | 0.525967 | NA | 0 | 0 | 0 | 0        | 2.139111 | 0 |
| 28177 | DEFB135   | 0.372021 | 2.579362 | 4.067274 | 0.634175 | 0.525967 | NA | 0 | 0 | 0 | 2.232127 | 0        | 0 |
| 28178 | DEFB134   | 0.372021 | 2.579362 | 4.067274 | 0.634175 | 0.525967 | NA | 0 | 0 | 0 | 2.232127 | 0        | 0 |
| 28180 | LOC11961: | 0.356518 | 2.579362 | 4.067274 | 0.634175 | 0.525967 | NA | 0 | 0 | 0 | 0        | 2.139111 | 0 |
| 28184 | LOC11961: | 0.372021 | 2.579362 | 4.067274 | 0.634175 | 0.525967 | NA | 0 | 0 | 0 | 2.232127 | 0        | 0 |



|       |           |          |          |          |          |          |    |   |   |   |          |          |   |
|-------|-----------|----------|----------|----------|----------|----------|----|---|---|---|----------|----------|---|
| 28185 | LOC103211 | 0.372021 | 2.579362 | 4.067274 | 0.634175 | 0.525967 | NA | 0 | 0 | 0 | 2.232127 | 0        | 0 |
| 28187 | LOC119615 | 0.372021 | 2.579362 | 4.067274 | 0.634175 | 0.525967 | NA | 0 | 0 | 0 | 2.232127 | 0        | 0 |
| 28190 | LOC119618 | 0.356518 | 2.579362 | 4.067274 | 0.634175 | 0.525967 | NA | 0 | 0 | 0 | 0        | 2.139111 | 0 |
| 28194 | LOC119615 | 0.372021 | 2.579362 | 4.067274 | 0.634175 | 0.525967 | NA | 0 | 0 | 0 | 2.232127 | 0        | 0 |
| 28196 | LOC119615 | 0.356518 | 2.579362 | 4.067274 | 0.634175 | 0.525967 | NA | 0 | 0 | 0 | 0        | 2.139111 | 0 |
| 28221 | LOC119615 | 0.356518 | 2.579362 | 4.067274 | 0.634175 | 0.525967 | NA | 0 | 0 | 0 | 0        | 2.139111 | 0 |
| 28245 | LOC119615 | 0.372021 | 2.579362 | 4.067274 | 0.634175 | 0.525967 | NA | 0 | 0 | 0 | 2.232127 | 0        | 0 |
| 28260 | TFF2      | 0.372021 | 2.579362 | 4.067274 | 0.634175 | 0.525967 | NA | 0 | 0 | 0 | 2.232127 | 0        | 0 |
| 28263 | LOC119615 | 0.356518 | 2.579362 | 4.067274 | 0.634175 | 0.525967 | NA | 0 | 0 | 0 | 0        | 2.139111 | 0 |
| 28273 | LOC119615 | 0.372021 | 2.579362 | 4.067274 | 0.634175 | 0.525967 | NA | 0 | 0 | 0 | 2.232127 | 0        | 0 |
| 28280 | LOC103225 | 0.372021 | 2.579362 | 4.067274 | 0.634175 | 0.525967 | NA | 0 | 0 | 0 | 2.232127 | 0        | 0 |
| 28291 | LOC119615 | 0.356518 | 2.579362 | 4.067274 | 0.634175 | 0.525967 | NA | 0 | 0 | 0 | 0        | 2.139111 | 0 |
| 28345 | LOC119615 | 0.372021 | 2.579362 | 4.067274 | 0.634175 | 0.525967 | NA | 0 | 0 | 0 | 2.232127 | 0        | 0 |
| 28351 | LOC119615 | 0.356518 | 2.579362 | 4.067274 | 0.634175 | 0.525967 | NA | 0 | 0 | 0 | 0        | 2.139111 | 0 |
| 28356 | DEFA4     | 0.356518 | 2.579362 | 4.067274 | 0.634175 | 0.525967 | NA | 0 | 0 | 0 | 0        | 2.139111 | 0 |
| 28357 | LOC103211 | 0.356518 | 2.579362 | 4.067274 | 0.634175 | 0.525967 | NA | 0 | 0 | 0 | 0        | 2.139111 | 0 |
| 28364 | LOC119615 | 0.372021 | 2.579362 | 4.067274 | 0.634175 | 0.525967 | NA | 0 | 0 | 0 | 2.232127 | 0        | 0 |
| 28367 | TRNAT-UG  | 0.356518 | 2.579362 | 4.067274 | 0.634175 | 0.525967 | NA | 0 | 0 | 0 | 0        | 2.139111 | 0 |
| 28369 | LOC119615 | 0.356518 | 2.579362 | 4.067274 | 0.634175 | 0.525967 | NA | 0 | 0 | 0 | 0        | 2.139111 | 0 |
| 28371 | LOC119615 | 0.356518 | 2.579362 | 4.067274 | 0.634175 | 0.525967 | NA | 0 | 0 | 0 | 0        | 2.139111 | 0 |
| 28375 | LOC119615 | 0.356518 | 2.579362 | 4.067274 | 0.634175 | 0.525967 | NA | 0 | 0 | 0 | 0        | 2.139111 | 0 |
| 28380 | LOC119615 | 0.372021 | 2.579362 | 4.067274 | 0.634175 | 0.525967 | NA | 0 | 0 | 0 | 2.232127 | 0        | 0 |
| 28386 | LOC119615 | 0.356518 | 2.579362 | 4.067274 | 0.634175 | 0.525967 | NA | 0 | 0 | 0 | 0        | 2.139111 | 0 |
| 28387 | LOC119615 | 0.356518 | 2.579362 | 4.067274 | 0.634175 | 0.525967 | NA | 0 | 0 | 0 | 0        | 2.139111 | 0 |
| 28389 | ATP6V1G3  | 0.356518 | 2.579362 | 4.067274 | 0.634175 | 0.525967 | NA | 0 | 0 | 0 | 0        | 2.139111 | 0 |
| 28393 | RG521     | 0.372021 | 2.579362 | 4.067274 | 0.634175 | 0.525967 | NA | 0 | 0 | 0 | 2.232127 | 0        | 0 |
| 28395 | LOC119615 | 0.356518 | 2.579362 | 4.067274 | 0.634175 | 0.525967 | NA | 0 | 0 | 0 | 0        | 2.139111 | 0 |
| 28412 | LOC119615 | 0.356518 | 2.579362 | 4.067274 | 0.634175 | 0.525967 | NA | 0 | 0 | 0 | 0        | 2.139111 | 0 |
| 28413 | LOC119615 | 0.372021 | 2.579362 | 4.067274 | 0.634175 | 0.525967 | NA | 0 | 0 | 0 | 2.232127 | 0        | 0 |
| 28416 | LOC119615 | 0.372021 | 2.579362 | 4.067274 | 0.634175 | 0.525967 | NA | 0 | 0 | 0 | 2.232127 | 0        | 0 |
| 28431 | LOC103231 | 0.372021 | 2.579362 | 4.067274 | 0.634175 | 0.525967 | NA | 0 | 0 | 0 | 2.232127 | 0        | 0 |
| 28432 | LOC103231 | 0.356518 | 2.579362 | 4.067274 | 0.634175 | 0.525967 | NA | 0 | 0 | 0 | 0        | 2.139111 | 0 |
| 28435 | LOC103231 | 0.372021 | 2.579362 | 4.067274 | 0.634175 | 0.525967 | NA | 0 | 0 | 0 | 2.232127 | 0        | 0 |
| 28442 | LOC119621 | 0.372021 | 2.579362 | 4.067274 | 0.634175 | 0.525967 | NA | 0 | 0 | 0 | 2.232127 | 0        | 0 |
| 28458 | LOC119615 | 0.356518 | 2.579362 | 4.067274 | 0.634175 | 0.525967 | NA | 0 | 0 | 0 | 0        | 2.139111 | 0 |
| 28465 | LOC119621 | 0.356518 | 2.579362 | 4.067274 | 0.634175 | 0.525967 | NA | 0 | 0 | 0 | 0        | 2.139111 | 0 |
| 28469 | LOC119621 | 0.372021 | 2.579362 | 4.067274 | 0.634175 | 0.525967 | NA | 0 | 0 | 0 | 2.232127 | 0        | 0 |
| 28470 | LOC119621 | 0.356518 | 2.579362 | 4.067274 | 0.634175 | 0.525967 | NA | 0 | 0 | 0 | 0        | 2.139111 | 0 |
| 28479 | SERPINE3  | 0.356518 | 2.579362 | 4.067274 | 0.634175 | 0.525967 | NA | 0 | 0 | 0 | 0        | 2.139111 | 0 |
| 28507 | LOC103214 | 0.372021 | 2.579362 | 4.067274 | 0.634175 | 0.525967 | NA | 0 | 0 | 0 | 2.232127 | 0        | 0 |
| 28511 | TRNAE-UU  | 0.356518 | 2.579362 | 4.067274 | 0.634175 | 0.525967 | NA | 0 | 0 | 0 | 0        | 2.139111 | 0 |
| 28512 | LOC119621 | 0.356518 | 2.579362 | 4.067274 | 0.634175 | 0.525967 | NA | 0 | 0 | 0 | 0        | 2.139111 | 0 |
| 28515 | LOC119621 | 0.372021 | 2.579362 | 4.067274 | 0.634175 | 0.525967 | NA | 0 | 0 | 0 | 2.232127 | 0        | 0 |
| 28527 | LOC103241 | 0.356518 | 2.579362 | 4.067274 | 0.634175 | 0.525967 | NA | 0 | 0 | 0 | 0        | 2.139111 | 0 |
| 28531 | LOC119621 | 0.372021 | 2.579362 | 4.067274 | 0.634175 | 0.525967 | NA | 0 | 0 | 0 | 2.232127 | 0        | 0 |
| 28536 | LOC119621 | 0.372021 | 2.579362 | 4.067274 | 0.634175 | 0.525967 | NA | 0 | 0 | 0 | 2.232127 | 0        | 0 |
| 28547 | LOC103244 | 0.356518 | 2.579362 | 4.067274 | 0.634175 | 0.525967 | NA | 0 | 0 | 0 | 0        | 2.139111 | 0 |
| 28554 | LOC103231 | 0.356518 | 2.579362 | 4.067274 | 0.634175 | 0.525967 | NA | 0 | 0 | 0 | 0        | 2.139111 | 0 |
| 28557 | LOC103231 | 0.356518 | 2.579362 | 4.067274 | 0.634175 | 0.525967 | NA | 0 | 0 | 0 | 0        | 2.139111 | 0 |
| 28565 | RNASE8    | 0.356518 | 2.579362 | 4.067274 | 0.634175 | 0.525967 | NA | 0 | 0 | 0 | 0        | 2.139111 | 0 |
| 28566 | RNASE6    | 0.356518 | 2.579362 | 4.067274 | 0.634175 | 0.525967 | NA | 0 | 0 | 0 | 0        | 2.139111 | 0 |
| 28570 | LOC103231 | 0.372021 | 2.579362 | 4.067274 | 0.634175 | 0.525967 | NA | 0 | 0 | 0 | 2.232127 | 0        | 0 |
| 28571 | LOC103231 | 0.356518 | 2.579362 | 4.067274 | 0.634175 | 0.525967 | NA | 0 | 0 | 0 | 0        | 2.139111 | 0 |
| 28572 | LOC103231 | 0.372021 | 2.579362 | 4.067274 | 0.634175 | 0.525967 | NA | 0 | 0 | 0 | 2.232127 | 0        | 0 |
| 28588 | LOC119621 | 0.356518 | 2.579362 | 4.067274 | 0.634175 | 0.525967 | NA | 0 | 0 | 0 | 0        | 2.139111 | 0 |
| 28590 | LOC119621 | 0.372021 | 2.579362 | 4.067274 | 0.634175 | 0.525967 | NA | 0 | 0 | 0 | 2.232127 | 0        | 0 |
| 28592 | LOC119621 | 0.372021 | 2.579362 | 4.067274 | 0.634175 | 0.525967 | NA | 0 | 0 | 0 | 2.232127 | 0        | 0 |
| 28597 | LOC119621 | 0.372021 | 2.579362 | 4.067274 | 0.634175 | 0.525967 | NA | 0 | 0 | 0 | 2.232127 | 0        | 0 |
| 28601 | LOC119621 | 0.372021 | 2.579362 | 4.067274 | 0.634175 | 0.525967 | NA | 0 | 0 | 0 | 2.232127 | 0        | 0 |
| 28602 | LOC103244 | 0.372021 | 2.579362 | 4.067274 | 0.634175 | 0.525967 | NA | 0 | 0 | 0 | 2.232127 | 0        | 0 |
| 28625 | LOC119621 | 0.372021 | 2.579362 | 4.067274 | 0.634175 | 0.525967 | NA | 0 | 0 | 0 | 2.232127 | 0        | 0 |
| 28626 | LOC119621 | 0.356518 | 2.579362 | 4.067274 | 0.634175 | 0.525967 | NA | 0 | 0 | 0 | 0        | 2.139111 | 0 |
| 28632 | LOC119621 | 0.356518 | 2.579362 | 4.067274 | 0.634175 | 0.525967 | NA | 0 | 0 | 0 | 0        | 2.139111 | 0 |
| 28645 | LOC103211 | 0.356518 | 2.579362 | 4.067274 | 0.634175 | 0.525967 | NA | 0 | 0 | 0 | 0        | 2.139111 | 0 |
| 28646 | LOC119621 | 0.372021 | 2.579362 | 4.067274 | 0.634175 | 0.525967 | NA | 0 | 0 | 0 | 2.232127 | 0        | 0 |
| 28647 | CCR8      | 0.372021 | 2.579362 | 4.067274 | 0.634175 | 0.525967 | NA | 0 | 0 | 0 | 2.232127 | 0        | 0 |
| 28669 | LOC119621 | 0.372021 | 2.579362 | 4.067274 | 0.634175 | 0.525967 | NA | 0 | 0 | 0 | 2.232127 | 0        | 0 |
| 28675 | LOC119621 | 0.356518 | 2.579362 | 4.067274 | 0.634175 | 0.525967 | NA | 0 | 0 | 0 | 0        | 2.139111 | 0 |
| 28682 | LOC119621 | 0.356518 | 2.579362 | 4.067274 | 0.634175 | 0.525967 | NA | 0 | 0 | 0 | 0        | 2.139111 | 0 |
| 28683 | LOC119621 | 0.372021 | 2.579362 | 4.067274 | 0.634175 | 0.525967 | NA | 0 | 0 | 0 | 2.232127 | 0        | 0 |
| 28721 | LOC119621 | 0.372021 | 2.579362 | 4.067274 | 0.634175 | 0.525967 | NA | 0 | 0 | 0 | 2.232127 | 0        | 0 |
| 28735 | LOC119621 | 0.356518 | 2.579362 | 4.067274 | 0.634175 | 0.525967 | NA | 0 | 0 | 0 | 0        | 2.139111 | 0 |
| 28747 | LOC119621 | 0.372021 | 2.579362 | 4.067274 | 0.634175 | 0.525967 | NA | 0 | 0 | 0 | 2.232127 | 0        | 0 |
| 28749 | LOC103231 | 0.356518 | 2.579362 | 4.067274 | 0.634175 | 0.525967 | NA | 0 | 0 | 0 | 0        | 2.139111 | 0 |



|       |           |          |          |          |          |          |    |   |   |   |          |          |   |
|-------|-----------|----------|----------|----------|----------|----------|----|---|---|---|----------|----------|---|
| 28752 | LOC11962: | 0.372021 | 2.579362 | 4.067274 | 0.634175 | 0.525967 | NA | 0 | 0 | 0 | 2.232127 | 0        | 0 |
| 28777 | LOC11962: | 0.356518 | 2.579362 | 4.067274 | 0.634175 | 0.525967 | NA | 0 | 0 | 0 | 0        | 2.139111 | 0 |
| 28782 | LOC11962: | 0.356518 | 2.579362 | 4.067274 | 0.634175 | 0.525967 | NA | 0 | 0 | 0 | 0        | 2.139111 | 0 |
| 28785 | LPAR4     | 0.356518 | 2.579362 | 4.067274 | 0.634175 | 0.525967 | NA | 0 | 0 | 0 | 0        | 2.139111 | 0 |
| 28801 | LOC11962: | 0.372021 | 2.579362 | 4.067274 | 0.634175 | 0.525967 | NA | 0 | 0 | 0 | 2.232127 | 0        | 0 |
| 28806 | LOC11962: | 0.356518 | 2.579362 | 4.067274 | 0.634175 | 0.525967 | NA | 0 | 0 | 0 | 0        | 2.139111 | 0 |
| 28816 | TRNAR-UC  | 0.356518 | 2.579362 | 4.067274 | 0.634175 | 0.525967 | NA | 0 | 0 | 0 | 0        | 2.139111 | 0 |
| 28822 | LOC11962: | 0.372021 | 2.579362 | 4.067274 | 0.634175 | 0.525967 | NA | 0 | 0 | 0 | 2.232127 | 0        | 0 |
| 28823 | LOC11962: | 0.356518 | 2.579362 | 4.067274 | 0.634175 | 0.525967 | NA | 0 | 0 | 0 | 0        | 2.139111 | 0 |
| 28836 | LOC11962: | 0.372021 | 2.579362 | 4.067274 | 0.634175 | 0.525967 | NA | 0 | 0 | 0 | 2.232127 | 0        | 0 |
| 28846 | LOC11962: | 0.372021 | 2.579362 | 4.067274 | 0.634175 | 0.525967 | NA | 0 | 0 | 0 | 2.232127 | 0        | 0 |
| 28849 | LOC11962: | 0.356518 | 2.579362 | 4.067274 | 0.634175 | 0.525967 | NA | 0 | 0 | 0 | 0        | 2.139111 | 0 |
| 28860 | LOC10321: | 0.356518 | 2.579362 | 4.067274 | 0.634175 | 0.525967 | NA | 0 | 0 | 0 | 0        | 2.139111 | 0 |
| 28872 | LOC11962: | 0.356518 | 2.579362 | 4.067274 | 0.634175 | 0.525967 | NA | 0 | 0 | 0 | 0        | 2.139111 | 0 |
| 28878 | KRTAP25-1 | 0.356518 | 2.579362 | 4.067274 | 0.634175 | 0.525967 | NA | 0 | 0 | 0 | 0        | 2.139111 | 0 |
| 28879 | LOC11962: | 0.356518 | 2.579362 | 4.067274 | 0.634175 | 0.525967 | NA | 0 | 0 | 0 | 0        | 2.139111 | 0 |
| 28887 | LOC11962: | 0.356518 | 2.579362 | 4.067274 | 0.634175 | 0.525967 | NA | 0 | 0 | 0 | 0        | 2.139111 | 0 |
| 28889 | LOC11962: | 0.356518 | 2.579362 | 4.067274 | 0.634175 | 0.525967 | NA | 0 | 0 | 0 | 0        | 2.139111 | 0 |
| 28894 | LOC11962: | 0.372021 | 2.579362 | 4.067274 | 0.634175 | 0.525967 | NA | 0 | 0 | 0 | 2.232127 | 0        | 0 |
| 28910 | LOC11962: | 0.356518 | 2.579362 | 4.067274 | 0.634175 | 0.525967 | NA | 0 | 0 | 0 | 0        | 2.139111 | 0 |
| 28915 | LOC11962: | 0.372021 | 2.579362 | 4.067274 | 0.634175 | 0.525967 | NA | 0 | 0 | 0 | 2.232127 | 0        | 0 |
| 28924 | LOC10322: | 0.372021 | 2.579362 | 4.067274 | 0.634175 | 0.525967 | NA | 0 | 0 | 0 | 2.232127 | 0        | 0 |
| 28928 | LOC11962: | 0.372021 | 2.579362 | 4.067274 | 0.634175 | 0.525967 | NA | 0 | 0 | 0 | 2.232127 | 0        | 0 |
| 28932 | LOC11962: | 0.356518 | 2.579362 | 4.067274 | 0.634175 | 0.525967 | NA | 0 | 0 | 0 | 0        | 2.139111 | 0 |
| 28948 | LOC11962: | 0.372021 | 2.579362 | 4.067274 | 0.634175 | 0.525967 | NA | 0 | 0 | 0 | 2.232127 | 0        | 0 |
| 28950 | PTH2      | 0.356518 | 2.579362 | 4.067274 | 0.634175 | 0.525967 | NA | 0 | 0 | 0 | 0        | 2.139111 | 0 |
| 28970 | ACTL9     | 0.372021 | 2.579362 | 4.067274 | 0.634175 | 0.525967 | NA | 0 | 0 | 0 | 2.232127 | 0        | 0 |
| 28974 | CCL18     | 0.356518 | 2.579362 | 4.067274 | 0.634175 | 0.525967 | NA | 0 | 0 | 0 | 0        | 2.139111 | 0 |
| 28997 | GPR82     | 0.372021 | 2.579362 | 4.067274 | 0.634175 | 0.525967 | NA | 0 | 0 | 0 | 2.232127 | 0        | 0 |
| 29016 | LOC11962: | 0.372021 | 2.579362 | 4.067274 | 0.634175 | 0.525967 | NA | 0 | 0 | 0 | 2.232127 | 0        | 0 |
| 29023 | LOC10324: | 0.372021 | 2.579362 | 4.067274 | 0.634175 | 0.525967 | NA | 0 | 0 | 0 | 2.232127 | 0        | 0 |
| 29024 | LOC11962: | 0.372021 | 2.579362 | 4.067274 | 0.634175 | 0.525967 | NA | 0 | 0 | 0 | 2.232127 | 0        | 0 |
| 29029 | LOC11962: | 0.356518 | 2.579362 | 4.067274 | 0.634175 | 0.525967 | NA | 0 | 0 | 0 | 0        | 2.139111 | 0 |
| 29034 | LOC11962: | 0.372021 | 2.579362 | 4.067274 | 0.634175 | 0.525967 | NA | 0 | 0 | 0 | 2.232127 | 0        | 0 |
| 29037 | LOC11962: | 0.372021 | 2.579362 | 4.067274 | 0.634175 | 0.525967 | NA | 0 | 0 | 0 | 2.232127 | 0        | 0 |
| 29040 | LOC11962: | 0.356518 | 2.579362 | 4.067274 | 0.634175 | 0.525967 | NA | 0 | 0 | 0 | 0        | 2.139111 | 0 |
| 29049 | KRTAP4-2  | 0.372021 | 2.579362 | 4.067274 | 0.634175 | 0.525967 | NA | 0 | 0 | 0 | 2.232127 | 0        | 0 |
| 29056 | LOC10324: | 0.356518 | 2.579362 | 4.067274 | 0.634175 | 0.525967 | NA | 0 | 0 | 0 | 0        | 2.139111 | 0 |
| 29059 | KRTAP3-1  | 0.356518 | 2.579362 | 4.067274 | 0.634175 | 0.525967 | NA | 0 | 0 | 0 | 0        | 2.139111 | 0 |
| 29061 | KRTAP3-3  | 0.356518 | 2.579362 | 4.067274 | 0.634175 | 0.525967 | NA | 0 | 0 | 0 | 0        | 2.139111 | 0 |
| 29062 | LOC11962: | 0.356518 | 2.579362 | 4.067274 | 0.634175 | 0.525967 | NA | 0 | 0 | 0 | 0        | 2.139111 | 0 |
| 29063 | LOC11962: | 0.356518 | 2.579362 | 4.067274 | 0.634175 | 0.525967 | NA | 0 | 0 | 0 | 0        | 2.139111 | 0 |
| 29083 | DEFB129   | 0.372021 | 2.579362 | 4.067274 | 0.634175 | 0.525967 | NA | 0 | 0 | 0 | 2.232127 | 0        | 0 |
| 29089 | LOC11962: | 0.356518 | 2.579362 | 4.067274 | 0.634175 | 0.525967 | NA | 0 | 0 | 0 | 0        | 2.139111 | 0 |
| 29092 | LOC11962: | 0.372021 | 2.579362 | 4.067274 | 0.634175 | 0.525967 | NA | 0 | 0 | 0 | 2.232127 | 0        | 0 |
| 29096 | LOC11962: | 0.356518 | 2.579362 | 4.067274 | 0.634175 | 0.525967 | NA | 0 | 0 | 0 | 0        | 2.139111 | 0 |
| 29097 | LOC10324: | 0.356518 | 2.579362 | 4.067274 | 0.634175 | 0.525967 | NA | 0 | 0 | 0 | 0        | 2.139111 | 0 |
| 29115 | LOC11962: | 0.356518 | 2.579362 | 4.067274 | 0.634175 | 0.525967 | NA | 0 | 0 | 0 | 0        | 2.139111 | 0 |
| 29119 | LOC11962: | 0.372021 | 2.579362 | 4.067274 | 0.634175 | 0.525967 | NA | 0 | 0 | 0 | 2.232127 | 0        | 0 |
| 29125 | LOC10324: | 0.372021 | 2.579362 | 4.067274 | 0.634175 | 0.525967 | NA | 0 | 0 | 0 | 2.232127 | 0        | 0 |
| 29129 | LOC11962: | 0.356518 | 2.579362 | 4.067274 | 0.634175 | 0.525967 | NA | 0 | 0 | 0 | 0        | 2.139111 | 0 |
| 29133 | LOC10324: | 0.356518 | 2.579362 | 4.067274 | 0.634175 | 0.525967 | NA | 0 | 0 | 0 | 0        | 2.139111 | 0 |
| 29139 | CATSPERD  | 0.372021 | 2.579362 | 4.067274 | 0.634175 | 0.525967 | NA | 0 | 0 | 0 | 2.232127 | 0        | 0 |
| 29145 | LOC11962: | 0.356518 | 2.579362 | 4.067274 | 0.634175 | 0.525967 | NA | 0 | 0 | 0 | 0        | 2.139111 | 0 |
| 29153 | LOC11962: | 0.356518 | 2.579362 | 4.067274 | 0.634175 | 0.525967 | NA | 0 | 0 | 0 | 0        | 2.139111 | 0 |
| 29157 | ODAM      | 0.356518 | 2.579362 | 4.067274 | 0.634175 | 0.525967 | NA | 0 | 0 | 0 | 0        | 2.139111 | 0 |
| 29161 | CSN2      | 0.372021 | 2.579362 | 4.067274 | 0.634175 | 0.525967 | NA | 0 | 0 | 0 | 2.232127 | 0        | 0 |
| 29162 | LOC11962: | 0.356518 | 2.579362 | 4.067274 | 0.634175 | 0.525967 | NA | 0 | 0 | 0 | 0        | 2.139111 | 0 |
| 29170 | LOC11962: | 0.372021 | 2.579362 | 4.067274 | 0.634175 | 0.525967 | NA | 0 | 0 | 0 | 2.232127 | 0        | 0 |
| 29171 | LOC11962: | 0.356518 | 2.579362 | 4.067274 | 0.634175 | 0.525967 | NA | 0 | 0 | 0 | 0        | 2.139111 | 0 |
| 29178 | LOC11962: | 0.372021 | 2.579362 | 4.067274 | 0.634175 | 0.525967 | NA | 0 | 0 | 0 | 2.232127 | 0        | 0 |
| 29187 | CLECL1    | 0.372021 | 2.579362 | 4.067274 | 0.634175 | 0.525967 | NA | 0 | 0 | 0 | 2.232127 | 0        | 0 |
| 29202 | LOC11962: | 0.372021 | 2.579362 | 4.067274 | 0.634175 | 0.525967 | NA | 0 | 0 | 0 | 2.232127 | 0        | 0 |
| 29225 | LOC10323: | 0.356518 | 2.579362 | 4.067274 | 0.634175 | 0.525967 | NA | 0 | 0 | 0 | 0        | 2.139111 | 0 |
| 29226 | LOC10323: | 0.356518 | 2.579362 | 4.067274 | 0.634175 | 0.525967 | NA | 0 | 0 | 0 | 0        | 2.139111 | 0 |
| 29232 | LOC10322: | 0.372021 | 2.579362 | 4.067274 | 0.634175 | 0.525967 | NA | 0 | 0 | 0 | 2.232127 | 0        | 0 |
| 29246 | LOC10324: | 0.372021 | 2.579362 | 4.067274 | 0.634175 | 0.525967 | NA | 0 | 0 | 0 | 2.232127 | 0        | 0 |
| 29247 | LOC11961: | 0.356518 | 2.579362 | 4.067274 | 0.634175 | 0.525967 | NA | 0 | 0 | 0 | 0        | 2.139111 | 0 |
| 29248 | LOC11962: | 0.356518 | 2.579362 | 4.067274 | 0.634175 | 0.525967 | NA | 0 | 0 | 0 | 0        | 2.139111 | 0 |
| 29294 | LOC11962: | 0.372021 | 2.579362 | 4.067274 | 0.634175 | 0.525967 | NA | 0 | 0 | 0 | 2.232127 | 0        | 0 |
| 29306 | LOC11962: | 0.356518 | 2.579362 | 4.067274 | 0.634175 | 0.525967 | NA | 0 | 0 | 0 | 0        | 2.139111 | 0 |
| 29321 | LOC10323: | 0.372021 | 2.579362 | 4.067274 | 0.634175 | 0.525967 | NA | 0 | 0 | 0 | 2.232127 | 0        | 0 |
| 29329 | LOC10323: | 0.356518 | 2.579362 | 4.067274 | 0.634175 | 0.525967 | NA | 0 | 0 | 0 | 0        | 2.139111 | 0 |
| 29331 | LOC10322: | 0.372021 | 2.579362 | 4.067274 | 0.634175 | 0.525967 | NA | 0 | 0 | 0 | 2.232127 | 0        | 0 |



|       |           |          |          |          |          |          |          |          |          |          |          |          |          |
|-------|-----------|----------|----------|----------|----------|----------|----------|----------|----------|----------|----------|----------|----------|
| 29380 | LOC103233 | 0.372021 | 2.579362 | 4.067274 | 0.634175 | 0.525967 | NA       | 0        | 0        | 0        | 2.232127 | 0        | 0        |
| 29392 | LOC103233 | 0.372021 | 2.579362 | 4.067274 | 0.634175 | 0.525967 | NA       | 0        | 0        | 0        | 2.232127 | 0        | 0        |
| 29424 | LOC119623 | 0.356518 | 2.579362 | 4.067274 | 0.634175 | 0.525967 | NA       | 0        | 0        | 0        | 0        | 2.139111 | 0        |
| 29470 | LOC103223 | 0.356518 | 2.579362 | 4.067274 | 0.634175 | 0.525967 | NA       | 0        | 0        | 0        | 0        | 2.139111 | 0        |
| 29484 | LOC103243 | 0.356518 | 2.579362 | 4.067274 | 0.634175 | 0.525967 | NA       | 0        | 0        | 0        | 0        | 2.139111 | 0        |
| 29496 | LOC103233 | 0.372021 | 2.579362 | 4.067274 | 0.634175 | 0.525967 | NA       | 0        | 0        | 0        | 2.232127 | 0        | 0        |
| 29497 | LOC119623 | 0.372021 | 2.579362 | 4.067274 | 0.634175 | 0.525967 | NA       | 0        | 0        | 0        | 2.232127 | 0        | 0        |
| 29499 | LOC119623 | 0.372021 | 2.579362 | 4.067274 | 0.634175 | 0.525967 | NA       | 0        | 0        | 0        | 2.232127 | 0        | 0        |
| 29501 | LOC103223 | 0.372021 | 2.579362 | 4.067274 | 0.634175 | 0.525967 | NA       | 0        | 0        | 0        | 2.232127 | 0        | 0        |
| 29513 | LOC119623 | 0.372021 | 2.579362 | 4.067274 | 0.634175 | 0.525967 | NA       | 0        | 0        | 0        | 2.232127 | 0        | 0        |
| 29519 | LOC119623 | 0.356518 | 2.579362 | 4.067274 | 0.634175 | 0.525967 | NA       | 0        | 0        | 0        | 0        | 2.139111 | 0        |
| 29531 | LOC119623 | 0.372021 | 2.579362 | 4.067274 | 0.634175 | 0.525967 | NA       | 0        | 0        | 0        | 2.232127 | 0        | 0        |
| 29534 | LOC103233 | 0.372021 | 2.579362 | 4.067274 | 0.634175 | 0.525967 | NA       | 0        | 0        | 0        | 2.232127 | 0        | 0        |
| 29535 | LOC103243 | 0.356518 | 2.579362 | 4.067274 | 0.634175 | 0.525967 | NA       | 0        | 0        | 0        | 0        | 2.139111 | 0        |
| 29547 | LOC103243 | 0.372021 | 2.579362 | 4.067274 | 0.634175 | 0.525967 | NA       | 0        | 0        | 0        | 2.232127 | 0        | 0        |
| 29550 | LOC103243 | 0.372021 | 2.579362 | 4.067274 | 0.634175 | 0.525967 | NA       | 0        | 0        | 0        | 2.232127 | 0        | 0        |
| 29551 | LOC119623 | 0.372021 | 2.579362 | 4.067274 | 0.634175 | 0.525967 | NA       | 0        | 0        | 0        | 2.232127 | 0        | 0        |
| 29561 | LOC103223 | 0.356518 | 2.579362 | 4.067274 | 0.634175 | 0.525967 | NA       | 0        | 0        | 0        | 0        | 2.139111 | 0        |
| 29563 | LOC103223 | 0.356518 | 2.579362 | 4.067274 | 0.634175 | 0.525967 | NA       | 0        | 0        | 0        | 0        | 2.139111 | 0        |
| 29575 | LOC119623 | 0.372021 | 2.579362 | 4.067274 | 0.634175 | 0.525967 | NA       | 0        | 0        | 0        | 2.232127 | 0        | 0        |
| 29587 | LOC119623 | 0.372021 | 2.579362 | 4.067274 | 0.634175 | 0.525967 | NA       | 0        | 0        | 0        | 2.232127 | 0        | 0        |
| 12521 | LOC103213 | 9.223349 | 2.578648 | 1.122386 | 2.297471 | 0.021592 | 0.045845 | 0        | 1.094824 | 6.957314 | 17.85702 | 21.39111 | 8.039836 |
| 15260 | LOC103233 | 4.632312 | 2.578044 | 1.443518 | 1.785945 | 0.074108 | 0.129106 | 0.542086 | 0        | 3.478657 | 8.928508 | 12.83466 | 2.009959 |
| 17538 | LOC119613 | 2.05347  | 2.577828 | 1.827905 | 1.410264 | 0.158462 | 0.240205 | 0        | 1.094824 | 0.695731 | 2.232127 | 4.278221 | 4.019918 |
| 5176  | SLA       | 26.75829 | 2.576635 | 0.561177 | 4.591485 | 4.40E-06 | 2.26E-05 | 6.505036 | 6.568942 | 9.740239 | 60.26743 | 51.33866 | 26.12947 |
| 11238 | CYP3A43   | 7.061684 | 2.576317 | 1.001337 | 2.572876 | 0.010086 | 0.023858 | 1.084173 | 2.189647 | 2.782925 | 11.16063 | 17.11289 | 8.039836 |
| 19493 | GUCA2A    | 1.443355 | 2.575915 | 2.338107 | 1.10171  | 0.270588 | 0.369034 | 0.542086 | 0        | 0.695731 | 0        | 6.417332 | 1.004979 |
| 15170 | TAS2R14   | 4.579782 | 2.57557  | 1.429231 | 1.802067 | 0.071535 | 0.125377 | 0.542086 | 0        | 3.478657 | 4.464254 | 14.97377 | 4.019918 |
| 12686 | PTCHD4    | 6.721923 | 2.575488 | 1.138374 | 2.262427 | 0.023671 | 0.049605 | 1.084173 | 0.547412 | 4.174388 | 13.39276 | 17.11289 | 4.019918 |
| 9483  | MYOCD     | 31.14158 | 2.575335 | 0.861719 | 2.988603 | 0.002803 | 0.007857 | 1.626259 | 1.094824 | 24.3506  | 75.89232 | 57.75599 | 26.12947 |
| 9578  | TRPM8     | 13.54346 | 2.574835 | 0.868111 | 2.96602  | 0.003017 | 0.008374 | 1.084173 | 4.926706 | 5.565851 | 17.85702 | 42.78221 | 9.044815 |
| 16142 | LOC119623 | 3.316917 | 2.574113 | 1.570383 | 1.639163 | 0.101179 | 0.166637 | 0.542086 | 2.189647 | 0        | 4.464254 | 10.69555 | 2.009959 |
| 17441 | TAS2R60   | 2.888485 | 2.573945 | 1.813242 | 1.419526 | 0.155746 | 0.2374   | 0        | 1.094824 | 1.391463 | 0        | 12.83466 | 2.009959 |
| 4057  | TNIP3     | 31.0137  | 2.573331 | 0.48305  | 5.327251 | 9.97E-08 | 6.53E-07 | 11.38381 | 8.211177 | 6.957314 | 55.80317 | 53.47777 | 50.24897 |
| 6335  | LOC119623 | 23.60657 | 2.573063 | 0.641522 | 4.010874 | 6.05E-05 | 0.000254 | 5.96295  | 2.189647 | 12.52316 | 35.71403 | 47.06043 | 38.18922 |
| 13763 | SCNN1D    | 5.046129 | 2.571885 | 1.25188  | 2.054419 | 0.039935 | 0.07714  | 0.542086 | 1.642235 | 2.087194 | 11.16063 | 12.83466 | 2.009959 |
| 10398 | LOC103223 | 15.19396 | 2.571832 | 0.929536 | 2.766792 | 0.005661 | 0.014474 | 1.084173 | 1.094824 | 11.1317  | 17.85702 | 44.92132 | 15.07469 |
| 15375 | LOC103223 | 4.617697 | 2.571789 | 1.457479 | 1.764547 | 0.07764  | 0.134248 | 0        | 0.547412 | 3.478657 | 6.696381 | 14.97377 | 2.009959 |
| 16018 | LOC103243 | 2.698838 | 2.57124  | 1.546853 | 1.662239 | 0.096465 | 0.160105 | 0.542086 | 1.094824 | 0.695731 | 6.696381 | 2.139111 | 5.024897 |
| 14830 | CCDC170   | 3.548468 | 2.570969 | 1.377287 | 1.866691 | 0.061945 | 0.111045 | 1.084173 | 0.547412 | 1.391463 | 6.696381 | 8.556443 | 3.014938 |
| 15354 | LOC103233 | 5.901842 | 2.569268 | 1.452976 | 1.76828  | 0.077014 | 0.13333  | 2.168345 | 2.737059 | 0        | 13.39276 | 17.11289 | 0        |
| 1403  | FCHO1     | 121.9959 | 2.569141 | 0.269831 | 9.521299 | 1.71E-21 | 3.24E-20 | 42.82482 | 27.37059 | 35.4823  | 220.9806 | 188.2417 | 217.0756 |
| 13448 | LOC119613 | 5.857678 | 2.566971 | 1.212093 | 2.1178   | 0.034192 | 0.067593 | 0        | 1.642235 | 3.478657 | 11.16063 | 12.83466 | 6.029877 |
| 623   | RASAL1    | 434.0818 | 2.5662   | 0.19222  | 13.35033 | 1.18E-40 | 5.03E-39 | 138.7741 | 97.98671 | 141.2335 | 676.3345 | 673.8199 | 876.3421 |
| 8945  | SCN4A     | 14.70341 | 2.563781 | 0.818275 | 3.133152 | 0.001729 | 0.00514  | 1.626259 | 2.189647 | 9.044508 | 33.4819  | 27.80844 | 14.06971 |
| 16071 | ID4       | 3.571769 | 2.563563 | 1.551193 | 1.652639 | 0.098404 | 0.162762 | 0        | 1.642235 | 1.391463 | 6.696381 | 10.69555 | 1.004979 |
| 15083 | CAMK1G    | 6.272854 | 2.56346  | 1.409133 | 1.819175 | 0.068885 | 0.121415 | 0        | 0        | 5.565851 | 8.928508 | 17.11289 | 6.029877 |
| 15824 | ARHGEF38  | 3.804208 | 2.563104 | 1.512273 | 1.694868 | 0.0901   | 0.151373 | 0        | 0.547412 | 2.782925 | 8.928508 | 8.556443 | 2.009959 |
| 17460 | LOC119623 | 3.157952 | 2.563025 | 1.80859  | 1.417139 | 0.156442 | 0.238203 | 0        | 0        | 2.782925 | 4.464254 | 10.69555 | 1.004979 |
| 14681 | CELA1     | 5.269088 | 2.561718 | 1.353592 | 1.892533 | 0.05842  | 0.10579  | 0.542086 | 0.547412 | 3.478657 | 8.928508 | 17.11289 | 1.004979 |
| 5580  | LOC103243 | 24.48255 | 2.560885 | 0.584514 | 4.381223 | 1.18E-05 | 5.62E-05 | 7.047123 | 8.211177 | 5.565851 | 58.0353  | 44.92132 | 23.11453 |
| 10144 | A2ML1     | 10.95776 | 2.560714 | 0.905805 | 2.827005 | 0.004699 | 0.012314 | 1.626259 | 1.642235 | 6.261582 | 26.78552 | 21.39111 | 8.039836 |
| 13956 | TNFRSF4   | 4.973492 | 2.56014  | 1.267188 | 2.020331 | 0.043349 | 0.082576 | 1.626259 | 0        | 2.782925 | 6.696381 | 10.69555 | 8.039836 |
| 17564 | ADH6      | 2.090498 | 2.559754 | 1.821809 | 1.405062 | 0.160003 | 0.242168 | 0        | 1.094824 | 0.695731 | 4.464254 | 4.278221 | 2.009959 |
| 12575 | LOC119613 | 5.621523 | 2.559213 | 1.11811  | 2.288874 | 0.022087 | 0.046694 | 0.542086 | 1.642235 | 2.782925 | 11.16063 | 8.556443 | 9.044815 |
| 15400 | LOC103223 | 4.130938 | 2.558459 | 1.454084 | 1.759499 | 0.078493 | 0.135493 | 2.168345 | 0        | 1.391463 | 2.232127 | 14.97377 | 4.019918 |
| 17087 | LOC119623 | 2.089611 | 2.55827  | 1.724391 | 1.483579 | 0.137921 | 0.214548 | 0.542086 | 0.547412 | 0.695731 | 4.464254 | 4.278221 | 2.009959 |
| 17088 | MAGEB17   | 2.089611 | 2.55827  | 1.724391 | 1.483579 | 0.137921 | 0.214548 | 0.542086 | 0.547412 | 0.695731 | 4.464254 | 4.278221 | 2.009959 |
| 17089 | LOC119623 | 2.089611 | 2.55827  | 1.724391 | 1.483579 | 0.137921 | 0.214548 | 0.542086 | 0.547412 | 0.695731 | 4.464254 | 4.278221 | 2.009959 |
| 292   | ARMCX1    | 602.3857 | 2.558193 | 0.145241 | 17.61349 | 1.94E-69 | 1.77E-67 | 162.0838 | 200.9001 | 161.4097 | 991.0644 | 1039.608 | 1059.248 |
| 6057  | PRKCG     | 26.89545 | 2.557956 | 0.617593 | 4.141814 | 3.45E-05 | 0.000151 | 3.794605 | 7.663765 | 11.82743 | 62.49956 | 53.47777 | 22.10955 |
| 7796  | CYP2A23   | 17.78408 | 2.555948 | 0.737393 | 3.466193 | 0.000528 | 0.0018   | 4.336691 | 2.737059 | 8.348776 | 29.01765 | 49.19955 | 13.06473 |
| 10944 | LOC119623 | 8.177481 | 2.555811 | 0.968009 | 2.640275 | 0.008284 | 0.020123 | 1.084173 | 3.831883 | 2.087194 | 22.32127 | 10.69555 | 9.044815 |
| 9210  | LOC103223 | 11.23551 | 2.555187 | 0.836868 | 3.053275 | 0.002264 | 0.006533 | 1.626259 | 3.284471 | 4.87012  | 15.62489 | 29.94755 | 12.05975 |
| 1701  | SPEF1     | 88.05976 | 2.555006 | 0.292702 | 8.729048 | 2.57E-18 | 4.01E-17 | 26.02015 | 24.08612 | 26.43779 | 167.4095 | 149.7377 | 134.6672 |
| 14080 | NEUROD2   | 9.350727 | 2.554748 | 1.278611 | 1.998065 | 0.04571  | 0.086316 | 0        | 0        | 8.348776 | 11.16063 | 23.53022 | 13.06473 |
| 2739  | FLRT1     | 50.89351 | 2.554483 | 0.375995 | 6.79393  | 1.09E-11 | 1.06E-10 | 14.09425 | 14.23271 | 16.00182 | 98.21359 | 83.42532 | 79.39338 |
| 11586 | COPZ2     | 9.116314 | 2.553814 | 1.022329 | 2.498035 | 0.012488 | 0.028656 | 3.794605 | 0.547412 | 3.478657 | 29.01765 | 12.83466 | 5.024897 |
| 16061 | LOC103223 | 3.773202 | 2.551969 | 1.542003 | 1.65497  | 0.09793  | 0.1621   | 0        | 0.547412 | 2.782925 | 4.464254 | 12.83466 | 2.009959 |
| 14225 | LOC103233 | 5.065714 | 2.551893 | 1.294248 | 1.971718 | 0.048642 | 0.090906 | 0        | 1.642235 | 2.782925 | 13.39276 | 8.556443 | 4.019918 |
| 18007 | LOC119623 | 2.126639 | 2.550991 | 1.901737 | 1.3414   | 0.179791 | 0.265421 | 0.542086 | 0.547412 | 0.695731 | 6.696381 | 4.278221 | 0        |
| 13875 | LOC119623 | 5.175508 | 2.550231 | 1.25314  | 2.035072 | 0.041844 | 0.080174 | 2.168345 | 2.189647 | 0        | 6.696381 | 14.97377 | 5.024897 |
| 177   | NR1H4     | 1122.935 | 2.549439 | 0.121778 | 20.93509 | 2.57E-97 | 3.85E-95 | 295.9792 | 364.5763 | 322.1236 | 1886.147 | 1974.399 | 1894.386 |
| 7024  | LOC119623 | 14.92514 | 2.549238 | 0.68423  | 3.725703 | 0.000195 | 0.000737 | 4.878777 | 3.284471 | 4.87012  | 22.32127 | 32.08666 | 22.10955 |



|       |           |          |          |          |          |           |           |          |          |          |          |          |          |
|-------|-----------|----------|----------|----------|----------|-----------|-----------|----------|----------|----------|----------|----------|----------|
| 13529 | HSPB9     | 5.048436 | 2.548983 | 1.212693 | 2.101918 | 0.03556   | 0.069878  | 1.084173 | 0.547412 | 2.782925 | 11.16063 | 10.69555 | 4.019918 |
| 11048 | LOC103232 | 7.550976 | 2.548577 | 0.974217 | 2.616026 | 0.008896  | 0.021407  | 2.168345 | 2.189647 | 2.087194 | 17.85702 | 14.97377 | 6.029877 |
| 18212 | GKN1      | 2.344463 | 2.547531 | 1.960847 | 1.299199 | 0.193876  | 0.28301   | 0        | 0        | 2.087194 | 6.696381 | 4.278221 | 1.004979 |
| 17972 | LOC119626 | 2.058605 | 2.546605 | 1.888933 | 1.348172 | 0.177603  | 0.262719  | 0.542086 | 0.547412 | 0.695731 | 0        | 8.556443 | 2.009959 |
| 14824 | LOC119623 | 4.162666 | 2.546049 | 1.363186 | 1.86772  | 0.061801  | 0.110833  | 0        | 1.642235 | 2.087194 | 8.928508 | 4.278221 | 8.039836 |
| 1004  | LRRC6     | 217.0524 | 2.545637 | 0.232011 | 10.97207 | 5.21E-28  | 1.38E-26  | 59.6295  | 80.46954 | 49.39693 | 339.2833 | 427.8221 | 345.7129 |
| 11567 | CFAP47    | 10.03239 | 2.544956 | 1.017262 | 2.501771 | 0.012357  | 0.028402  | 0        | 3.284471 | 5.565851 | 15.62489 | 25.66933 | 10.04979 |
| 6377  | LOC119625 | 19.08613 | 2.544888 | 0.637722 | 3.990593 | 6.59E-05  | 0.000275  | 5.420864 | 5.474118 | 5.565851 | 46.87467 | 32.08666 | 19.09461 |
| 111   | FOLR1     | 2682.028 | 2.544842 | 0.106386 | 23.92084 | 1.86E-126 | 4.45E-124 | 736.6954 | 878.0485 | 738.8667 | 4602.646 | 4504.967 | 4630.945 |
| 12508 | LOC103222 | 7.362781 | 2.543326 | 1.105792 | 2.300003 | 0.021448  | 0.045587  | 0.542086 | 1.094824 | 4.87012  | 13.39276 | 19.252   | 5.024897 |
| 15188 | LOC103217 | 3.351117 | 2.541912 | 1.413813 | 1.797913 | 0.072191  | 0.126367  | 0.542086 | 1.642235 | 0.695731 | 8.928508 | 4.278221 | 4.019918 |
| 19140 | CALML3    | 13.35103 | 2.541039 | 2.185527 | 1.162666 | 0.244965  | 0.34025   | 0        | 0        | 11.82743 | 8.928508 | 34.22577 | 25.12449 |
| 9670  | LOC119627 | 12.94204 | 2.540049 | 0.864263 | 2.938978 | 0.003293  | 0.009053  | 2.168345 | 1.642235 | 7.653045 | 15.62489 | 38.50399 | 12.05975 |
| 14745 | FCN2      | 5.177589 | 2.539733 | 1.349649 | 1.881773 | 0.059867  | 0.107939  | 0        | 0.547412 | 4.174388 | 4.464254 | 12.83466 | 9.044815 |
| 11709 | TMEM1321  | 16.82265 | 2.538552 | 1.027901 | 2.469648 | 0.013525  | 0.030707  | 0        | 1.094824 | 13.91463 | 33.4819  | 36.36488 | 16.07967 |
| 18251 | LMOD2     | 2.32896  | 2.538491 | 1.96341  | 1.292899 | 0.196046  | 0.285536  | 0        | 0        | 2.087194 | 4.464254 | 6.417332 | 1.004979 |
| 18252 | SOWAHD    | 2.32896  | 2.538491 | 1.96341  | 1.292899 | 0.196046  | 0.285536  | 0        | 0        | 2.087194 | 4.464254 | 6.417332 | 1.004979 |
| 18253 | LOC119622 | 2.32896  | 2.538491 | 1.96341  | 1.292899 | 0.196046  | 0.285536  | 0        | 0        | 2.087194 | 4.464254 | 6.417332 | 1.004979 |
| 14664 | ALOX12    | 5.251645 | 2.537455 | 1.338857 | 1.89524  | 0.058061  | 0.105261  | 0        | 0.547412 | 4.174388 | 8.928508 | 12.83466 | 5.024897 |
| 6322  | LOC119625 | 12.10686 | 2.537156 | 0.631809 | 4.015705 | 5.93E-05  | 0.000249  | 5.96295  | 4.379295 | 9.044508 | 31.24978 | 59.8951  | 22.10955 |
| 10528 | CACNA1F   | 24.06214 | 2.536422 | 0.926222 | 2.738461 | 0.006173  | 0.015587  | 0        | 3.284471 | 18.08902 | 53.57105 | 51.33866 | 18.08963 |
| 17011 | SPO11     | 2.742777 | 2.53634  | 1.701467 | 1.490679 | 0.136046  | 0.212602  | 0        | 1.642235 | 0.695731 | 6.696381 | 6.417332 | 1.004979 |
| 17012 | LOC103215 | 2.742777 | 2.53634  | 1.701467 | 1.490679 | 0.136046  | 0.212602  | 0        | 1.642235 | 0.695731 | 6.696381 | 6.417332 | 1.004979 |
| 14991 | LOC119620 | 3.334726 | 2.536257 | 1.381647 | 1.835677 | 0.066406  | 0.117763  | 1.084173 | 1.094824 | 0.695731 | 6.696381 | 6.417332 | 4.019918 |
| 15060 | LOC119620 | 4.985538 | 2.536132 | 1.391304 | 1.822845 | 0.068327  | 0.120616  | 1.626259 | 0        | 2.782925 | 2.232127 | 19.252   | 4.019918 |
| 16251 | CUNH14or  | 2.689358 | 2.535714 | 1.568234 | 1.616924 | 0.105895  | 0.173233  | 0.542086 | 1.094824 | 0.695731 | 2.232127 | 8.556443 | 3.014938 |
| 15226 | LOC119626 | 3.318336 | 2.534484 | 1.415159 | 1.790954 | 0.073301  | 0.127985  | 1.626259 | 0.547412 | 0.695731 | 4.464254 | 8.556443 | 4.019918 |
| 6936  | ADGRE2    | 18.43006 | 2.533553 | 0.673386 | 3.762405 | 0.000168  | 0.000645  | 2.168345 | 7.116354 | 6.957314 | 42.41041 | 27.80844 | 24.11951 |
| 21110 | CA3       | 1.298534 | 2.532755 | 2.932304 | 0.863742 | 0.387729  | 0.488289  | 0        | 1.094824 | 0        | 6.696381 | 0        | 0        |
| 15095 | LOC103217 | 3.319224 | 2.531574 | 1.393364 | 1.816879 | 0.069236  | 0.121935  | 1.084173 | 1.094824 | 0.695731 | 4.464254 | 8.556443 | 4.019918 |
| 92    | SUSD6     | 2471.681 | 2.531474 | 0.102198 | 24.77018 | 1.88E-135 | 5.43E-133 | 758.9209 | 701.2345 | 728.4307 | 4138.363 | 3961.633 | 4541.502 |
| 12454 | LOC103247 | 7.156273 | 2.531233 | 1.095781 | 2.309981 | 0.020889  | 0.044591  | 1.084173 | 4.379295 | 0.695731 | 22.32127 | 6.417332 | 8.039836 |
| 3358  | TSHZ2     | 58.40203 | 2.529429 | 0.422928 | 5.98076  | 2.22E-09  | 1.76E-08  | 13.55216 | 13.13788 | 25.04633 | 89.28508 | 139.0422 | 70.34856 |
| 8998  | IL2RB     | 16.49081 | 2.528787 | 0.811378 | 3.116657 | 0.001829  | 0.005404  | 1.084173 | 3.831883 | 9.740239 | 42.41041 | 27.80844 | 14.06971 |
| 19918 | TRNAT-UG  | 1.208088 | 2.528251 | 2.420964 | 1.044316 | 0.296339  | 0.395525  | 0.542086 | 0.547412 | 0        | 0        | 2.139111 | 4.019918 |
| 14223 | LCK       | 9.235761 | 2.527093 | 1.28085  | 1.972981 | 0.048498  | 0.09065   | 0        | 0        | 8.348776 | 15.62489 | 21.39111 | 10.04979 |
| 9026  | ZNF83     | 19.98585 | 2.526804 | 0.813022 | 3.107915 | 0.001884  | 0.005549  | 2.168345 | 4.379295 | 11.1317  | 29.01765 | 64.17332 | 9.044815 |
| 12502 | ICAM1     | 6.093538 | 2.526406 | 1.098123 | 2.300658 | 0.021411  | 0.04553   | 2.710432 | 0.547412 | 2.087194 | 15.62489 | 8.556443 | 7.034856 |
| 16638 | LOC103222 | 3.822905 | 2.526232 | 1.628521 | 1.551243 | 0.120843  | 0.19309   | 0        | 0        | 3.478657 | 11.16063 | 4.278221 | 4.019918 |
| 16397 | DRGX      | 4.568361 | 2.525737 | 1.590006 | 1.588507 | 0.112172  | 0.18186   | 0        | 0        | 4.174388 | 2.232127 | 14.97377 | 6.029877 |
| 803   | GPR15     | 198.494  | 2.52547  | 0.209203 | 12.07189 | 1.49E-33  | 4.92E-32  | 66.13454 | 60.2153  | 49.39693 | 328.1227 | 344.3968 | 342.698  |
| 6920  | LOC103232 | 20.25644 | 2.525445 | 0.670393 | 3.767112 | 0.000165  | 0.000634  | 3.252518 | 4.379295 | 10.43597 | 29.01765 | 51.33866 | 23.11453 |
| 17731 | NKAIN3    | 2.981238 | 2.525268 | 1.8308   | 1.379325 | 0.167795  | 0.251583  | 0        | 0.547412 | 2.087194 | 6.696381 | 8.556443 | 0        |
| 14686 | LOC119626 | 3.935362 | 2.525206 | 1.334817 | 1.8918   | 0.058518  | 0.10593   | 0.542086 | 2.189647 | 0.695731 | 4.464254 | 10.69555 | 5.024897 |
| 1639  | LOC103227 | 117.2959 | 2.524881 | 0.284373 | 8.878763 | 6.76E-19  | 1.10E-17  | 35.7777  | 26.82318 | 42.43961 | 60.7131  | 213.9111 | 224.1104 |
| 14513 | NPY4R2    | 4.002507 | 2.524816 | 1.314147 | 1.921258 | 0.054699  | 0.100198  | 1.084173 | 1.642235 | 0.695731 | 11.16063 | 6.417332 | 3.014938 |
| 1539  | LOC119627 | 109.8086 | 2.524601 | 0.276501 | 9.130516 | 6.82E-20  | 1.18E-18  | 28.73058 | 32.2973  | 36.17803 | 191.9629 | 213.9111 | 155.7718 |
| 9444  | LOC103225 | 20.6601  | 2.524413 | 0.841919 | 2.998402 | 0.002714  | 0.00764   | 5.96295  | 0.547412 | 11.82743 | 37.94616 | 55.61688 | 12.05975 |
| 11672 | CUNH19or  | 11.94382 | 2.524216 | 1.019106 | 2.476892 | 0.013253  | 0.030186  | 0.542086 | 0.547412 | 9.740239 | 20.08914 | 25.66933 | 15.07469 |
| 13093 | SDS       | 8.905541 | 2.523968 | 1.153301 | 2.188473 | 0.028635  | 0.058143  | 1.084173 | 0        | 6.957314 | 26.78552 | 8.556443 | 10.04979 |
| 13407 | LOC119625 | 5.20688  | 2.523785 | 1.187154 | 2.125912 | 0.033511  | 0.066449  | 2.168345 | 1.094824 | 1.391463 | 13.39276 | 2.139111 | 11.05477 |
| 16941 | SPP2      | 2.92782  | 2.523549 | 1.681565 | 1.500715 | 0.133429  | 0.209387  | 0.542086 | 0        | 2.087194 | 2.232127 | 10.69555 | 2.009959 |
| 14730 | LOC119627 | 5.909946 | 2.522792 | 1.339413 | 1.883505 | 0.059632  | 0.107625  | 0        | 1.094824 | 4.174388 | 8.928508 | 19.252   | 2.009959 |
| 17098 | CCL5      | 2.469594 | 2.5222   | 1.702133 | 1.481788 | 0.138397  | 0.215188  | 0.542086 | 1.642235 | 0        | 4.464254 | 2.139111 | 6.029877 |
| 14038 | TLX1      | 6.751613 | 2.522018 | 1.256751 | 2.006777 | 0.044773  | 0.084789  | 0        | 0.547412 | 5.565851 | 13.39276 | 14.97377 | 6.029877 |
| 20347 | LOC119627 | 1.261506 | 2.521797 | 2.600591 | 0.969702 | 0.332195  | 0.43404   | 0        | 1.094824 | 0        | 4.464254 | 0        | 2.009959 |
| 13807 | BHMT      | 5.037016 | 2.521718 | 1.232372 | 2.046232 | 0.040734  | 0.078431  | 0.542086 | 0.547412 | 3.478657 | 8.928508 | 10.69555 | 6.029877 |
| 9290  | CUNH14or  | 11.6431  | 2.520954 | 0.830755 | 3.034533 | 0.002409  | 0.006896  | 2.710432 | 6.02153  | 1.391463 | 17.85702 | 27.80844 | 14.06971 |
| 13363 | HEPHL1    | 7.844368 | 2.520428 | 1.181039 | 2.134076 | 0.032837  | 0.065327  | 0.542086 | 2.189647 | 4.174388 | 15.62489 | 23.53022 | 1.004979 |
| 9366  | SKAP1     | 12.5895  | 2.520045 | 0.835903 | 3.014758 | 0.002572  | 0.0073    | 1.626259 | 3.284471 | 6.261582 | 20.08914 | 34.22577 | 10.04979 |
| 9234  | DHRS9     | 10.21378 | 2.519947 | 0.827168 | 3.046475 | 0.002315  | 0.006666  | 2.168345 | 2.189647 | 4.87012  | 17.85702 | 17.11289 | 17.08465 |
| 20511 | LOC119626 | 1.297647 | 2.519869 | 2.668181 | 0.944414 | 0.344958  | 0.447112  | 0.542086 | 0.547412 | 0        | 6.696381 | 0        | 0        |
| 12345 | LOC103235 | 11.98775 | 2.51919  | 1.078779 | 2.335225 | 0.019532  | 0.042062  | 0        | 1.094824 | 9.740239 | 20.08914 | 29.94755 | 11.05477 |
| 16006 | LOC103224 | 3.083069 | 2.518676 | 1.514085 | 1.663497 | 0.096213  | 0.159804  | 1.626259 | 1.094824 | 0        | 4.464254 | 4.278221 | 7.034856 |
| 15561 | LOC103222 | 4.333094 | 2.518533 | 1.452134 | 1.734367 | 0.082853  | 0.141549  | 0        | 0.547412 | 3.478657 | 2.232127 | 10.69555 | 9.044815 |
| 8741  | NUP210L   | 13.63655 | 2.518393 | 0.789325 | 3.190564 | 0.00142   | 0.004319  | 3.794605 | 3.284471 | 4.87012  | 22.32127 | 38.50399 | 9.044815 |
| 11194 | DPEP2     | 9.716686 | 2.518314 | 0.974868 | 2.583236 | 0.009788  | 0.023245  | 3.252518 | 1.094824 | 4.174388 | 20.08914 | 25.66933 | 4.019918 |
| 18097 | SLC4A1    | 29.40512 | 2.517731 | 1.903685 | 1.322557 | 0.185983  | 0.273214  | 0        | 0.547412 | 25.74206 | 46.87467 | 79.14709 | 24.11951 |
| 20452 | LOC103235 | 1.208975 | 2.517205 | 2.638876 | 0.953893 | 0.340138  | 0.442136  | 0        | 1.094824 | 0        | 0        | 2.139111 | 4.019918 |
| 16581 | LOC103232 | 3.754872 | 2.51709  | 1.61317  | 1.560337 | 0.11868   | 0.190285  | 0        | 0        | 3.478657 | 4.464254 | 8.556443 | 6.029877 |
| 8028  | LOC103246 | 22.74875 | 2.516138 | 0.739188 | 3.403922 | 0.000664  | 0.0022    | 3.252518 | 3.831883 | 13.2189  | 37.94616 | 64.17332 | 14.06971 |
| 18956 | TRNAC-GC  | 1.9284   | 2.515505 | 2        |          |           |           |          |          |          |          |          |          |



|       |           |          |          |          |          |          |          |          |          |          |          |          |          |
|-------|-----------|----------|----------|----------|----------|----------|----------|----------|----------|----------|----------|----------|----------|
| 7588  | TPRG1     | 19.43498 | 2.513651 | 0.71212  | 3.529813 | 0.000416 | 0.001457 | 3.794605 | 4.379295 | 9.044508 | 42.41041 | 44.92132 | 12.05975 |
| 14665 | HAAO      | 4.226354 | 2.513492 | 1.326586 | 1.894706 | 0.058131 | 0.105381 | 0.542086 | 1.094824 | 2.087194 | 8.928508 | 10.69555 | 2.009959 |
| 15092 | LOC119626 | 3.939609 | 2.513426 | 1.382611 | 1.817884 | 0.069082 | 0.12169  | 1.626259 | 1.094824 | 0.695731 | 2.232127 | 14.97377 | 3.014938 |
| 15387 | LOC103228 | 4.211739 | 2.511968 | 1.425007 | 1.762776 | 0.077938 | 0.134658 | 0        | 1.642235 | 2.087194 | 6.696381 | 12.83466 | 2.009959 |
| 5899  | SLC51A    | 25.32803 | 2.511358 | 0.596191 | 4.212338 | 2.53E-05 | 0.000114 | 7.047123 | 8.211177 | 6.957314 | 64.73168 | 44.92132 | 20.09959 |
| 12250 | LOC103224 | 6.66583  | 2.51118  | 1.06586  | 2.356014 | 0.018472 | 0.040088 | 0.542086 | 3.284471 | 2.087194 | 8.928508 | 17.11289 | 8.039836 |
| 17076 | LOC119624 | 2.776089 | 2.510844 | 1.691392 | 1.484484 | 0.137681 | 0.214347 | 0.542086 | 0.547412 | 1.391463 | 11.16063 | 0        | 3.014938 |
| 2976  | MAP2K6    | 54.34334 | 2.510343 | 0.388846 | 6.455882 | 1.08E-10 | 9.61E-10 | 13.55216 | 13.13788 | 22.2634  | 82.5887  | 109.0946 | 85.42325 |
| 12915 | LOC119623 | 5.415224 | 2.510209 | 1.131341 | 2.21879  | 0.026501 | 0.054578 | 1.626259 | 0.547412 | 2.782925 | 8.928508 | 8.556443 | 10.04979 |
| 12540 | LOC103215 | 6.431616 | 2.510084 | 1.09367  | 2.295103 | 0.021727 | 0.046062 | 1.626259 | 3.284471 | 0.695731 | 6.696381 | 19.252   | 7.034856 |
| 7873  | PPP1R14A  | 13.35435 | 2.509975 | 0.728048 | 3.447542 | 0.000566 | 0.00191  | 2.710432 | 3.831883 | 5.565851 | 26.78552 | 17.11289 | 24.11951 |
| 19861 | LOC119625 | 1.244228 | 2.509476 | 2.397402 | 1.046748 | 0.295216 | 0.395012 | 1.084173 | 0        | 0        | 2.232127 | 2.139111 | 2.009959 |
| 19457 | LOC103228 | 2.182364 | 2.50935  | 2.263155 | 1.108784 | 0.267523 | 0.365529 | 0.542086 | 0        | 1.391463 | 11.16063 | 0        | 0        |
| 14337 | EDAR      | 4.773571 | 2.509266 | 1.283681 | 1.954743 | 0.050613 | 0.093852 | 0.542086 | 1.642235 | 2.087194 | 2.232127 | 17.11289 | 5.024897 |
| 20152 | CLEC2A    | 1.441415 | 2.507991 | 2.499234 | 1.003504 | 0.315618 | 0.416371 | 0        | 0        | 1.391463 | 2.232127 | 0        | 5.024897 |
| 11410 | NOX3      | 8.903197 | 2.507478 | 0.989575 | 2.533893 | 0.01128  | 0.026283 | 3.252518 | 1.094824 | 3.478657 | 22.32127 | 19.252   | 4.019918 |
| 13896 | LOC119619 | 8.257603 | 2.50634  | 1.234361 | 2.030475 | 0.042308 | 0.080942 | 0        | 0.547412 | 6.957314 | 15.62489 | 21.39111 | 5.024897 |
| 14746 | POU3F1    | 5.043926 | 2.505932 | 1.331831 | 1.881569 | 0.059895 | 0.107982 | 0        | 1.094824 | 3.478657 | 6.696381 | 14.97377 | 4.019918 |
| 19476 | LOC119618 | 1.46294  | 2.505868 | 2.269039 | 1.104374 | 0.269431 | 0.367739 | 0        | 0        | 1.391463 | 2.232127 | 2.139111 | 3.014938 |
| 19477 | LOC119620 | 1.46294  | 2.505868 | 2.269039 | 1.104374 | 0.269431 | 0.367739 | 0        | 0        | 1.391463 | 2.232127 | 2.139111 | 3.014938 |
| 15985 | CUNH10or  | 4.281677 | 2.505863 | 1.502168 | 1.668164 | 0.095283 | 0.158461 | 2.168345 | 1.642235 | 0        | 0        | 12.83466 | 9.044815 |
| 11941 | RAB25     | 6.70197  | 2.505816 | 1.036996 | 2.416419 | 0.015674 | 0.034896 | 1.084173 | 2.737059 | 2.087194 | 11.16063 | 17.11289 | 6.029877 |
| 4681  | LOC103233 | 26.74097 | 2.505593 | 0.51175  | 4.896123 | 9.77E-07 | 5.55E-06 | 7.589209 | 8.211177 | 8.348776 | 35.71403 | 51.33866 | 49.24399 |
| 17826 | LRRRC3C   | 2.07819  | 2.504993 | 1.824871 | 1.372696 | 0.169847 | 0.253303 | 0        | 0.547412 | 1.391463 | 2.232127 | 4.278221 | 4.019918 |
| 20064 | CDH7      | 1.478443 | 2.504979 | 2.458807 | 1.018778 | 0.308308 | 0.408512 | 0        | 0        | 1.391463 | 4.464254 | 0        | 3.014938 |
| 3328  | LOC119625 | 44.48795 | 2.504697 | 0.416146 | 6.018791 | 1.76E-09 | 1.40E-08 | 9.215468 | 14.78012 | 16.00182 | 82.5887  | 77.00798 | 67.33362 |
| 14428 | LOC103233 | 5.907118 | 2.50468  | 1.291872 | 1.938799 | 0.052526 | 0.096784 | 0        | 0.547412 | 4.87012  | 11.16063 | 12.83466 | 6.029877 |
| 16753 | CEMP1     | 3.796563 | 2.504314 | 1.634099 | 1.532535 | 0.12539  | 0.198988 | 0        | 3.284471 | 0        | 8.928508 | 8.556443 | 2.009959 |
| 15737 | SPIC      | 4.412285 | 2.504097 | 1.462805 | 1.711846 | 0.086925 | 0.146845 | 0.542086 | 0        | 3.478657 | 4.464254 | 14.97377 | 3.014938 |
| 8841  | DUOX2     | 21.60906 | 2.503601 | 0.792539 | 3.158962 | 0.001583 | 0.004761 | 2.710432 | 2.189647 | 14.61036 | 46.87467 | 49.19955 | 14.06971 |
| 18449 | LOC119624 | 2.041162 | 2.503304 | 1.991642 | 1.256905 | 0.208788 | 0.300847 | 0        | 0.547412 | 1.391463 | 0        | 4.278221 | 6.029877 |
| 5780  | DLX3      | 25.34012 | 2.501296 | 0.583803 | 4.284488 | 1.83E-05 | 8.42E-05 | 4.878777 | 4.926706 | 13.2189  | 44.64254 | 49.19955 | 35.17428 |
| 14663 | LOC103218 | 5.606645 | 2.50091  | 1.319437 | 1.895437 | 0.058035 | 0.105221 | 0        | 1.642235 | 3.478657 | 2.232127 | 19.252   | 7.034856 |
| 17938 | SFRP2     | 2.529035 | 2.50017  | 1.84739  | 1.353353 | 0.175943 | 0.260756 | 0        | 2.189647 | 0        | 6.696381 | 4.278221 | 2.009959 |
| 17177 | LOC103215 | 2.473841 | 2.499915 | 1.699283 | 1.471159 | 0.141248 | 0.218611 | 1.626259 | 0.547412 | 0        | 2.232127 | 6.417332 | 4.019918 |
| 5141  | LOC119621 | 27.64185 | 2.499064 | 0.542413 | 4.607313 | 4.08E-06 | 2.11E-05 | 5.420864 | 7.663765 | 11.82743 | 46.87467 | 59.8951  | 34.1693  |
| 1511  | HAVCR2    | 120.3803 | 2.498936 | 0.270862 | 9.225848 | 2.81E-20 | 4.95E-19 | 41.19856 | 35.58177 | 31.30791 | 174.1059 | 248.1368 | 191.9511 |
| 14490 | LOC119620 | 5.605096 | 2.498468 | 1.296713 | 1.92677  | 0.054008 | 0.09909  | 3.794605 | 1.094824 | 0        | 4.464254 | 19.252   | 5.024897 |
| 13766 | SP9       | 6.443806 | 2.498414 | 1.216624 | 2.053563 | 0.040018 | 0.077283 | 0.542086 | 1.094824 | 4.174388 | 24.5534  | 4.278221 | 4.019918 |
| 10833 | ACOT4     | 10.99343 | 2.49834  | 0.937888 | 2.663795 | 0.007726 | 0.018961 | 3.252518 | 1.642235 | 4.87012  | 20.08914 | 32.08666 | 4.019918 |
| 414   | S100A1    | 16712.71 | 2.497829 | 0.160863 | 15.52769 | 2.25E-54 | 1.45E-52 | 4010.355 | 6648.864 | 4422.069 | 29731.93 | 29532.56 | 25930.48 |
| 16196 | CD53      | 3.41109  | 2.49746  | 1.534474 | 1.627567 | 0.103617 | 0.170082 | 1.626259 | 0        | 1.391463 | 11.16063 | 4.278221 | 2.009959 |
| 20540 | LOC103224 | 1.283031 | 2.496624 | 2.649045 | 0.942462 | 0.345956 | 0.447515 | 0        | 1.094824 | 0        | 4.464254 | 2.139111 | 0        |
| 20562 | ARHGDI8   | 1.283031 | 2.496624 | 2.649045 | 0.942462 | 0.345956 | 0.447515 | 0        | 1.094824 | 0        | 4.464254 | 2.139111 | 0        |
| 20567 | LOC103234 | 1.283031 | 2.496624 | 2.649045 | 0.942462 | 0.345956 | 0.447515 | 0        | 1.094824 | 0        | 4.464254 | 2.139111 | 0        |
| 10889 | BARHL2    | 16.13334 | 2.495819 | 0.940948 | 2.652452 | 0.007991 | 0.01951  | 0.542086 | 1.642235 | 12.52316 | 37.94616 | 32.08666 | 12.05975 |
| 18095 | LOC119623 | 1.860366 | 2.495583 | 1.88677  | 1.322675 | 0.185944 | 0.273186 | 0.542086 | 1.094824 | 0        | 2.232127 | 4.278221 | 3.014938 |
| 11230 | DAND5     | 9.770471 | 2.495216 | 0.969157 | 2.574625 | 0.010035 | 0.023756 | 2.710432 | 0.547412 | 5.565851 | 26.78552 | 14.97377 | 8.039836 |
| 6392  | LOC119621 | 25.83836 | 2.493377 | 0.62615  | 3.982074 | 6.83E-05 | 0.000284 | 3.794605 | 7.663765 | 11.82743 | 40.17829 | 68.45154 | 23.11453 |
| 10372 | ITGB7     | 11.38733 | 2.492893 | 0.899719 | 2.770746 | 0.005593 | 0.014335 | 0.542086 | 5.474118 | 4.174388 | 24.5534  | 32.08666 | 10.04979 |
| 10721 | LOC103230 | 12.06161 | 2.492672 | 0.927799 | 2.686651 | 0.007217 | 0.017897 | 1.084173 | 2.189647 | 7.653045 | 22.32127 | 32.08666 | 7.034856 |
| 9352  | ANO1      | 12.28578 | 2.492433 | 0.825736 | 3.018437 | 0.002541 | 0.007223 | 1.626259 | 3.831883 | 5.565851 | 31.24978 | 21.39111 | 10.04979 |
| 5643  | LOC119620 | 25.54188 | 2.490842 | 0.572629 | 4.349834 | 1.36E-05 | 6.42E-05 | 5.420864 | 6.568942 | 11.1317  | 37.94616 | 62.03421 | 30.14938 |
| 20469 | LOC119623 | 1.230501 | 2.490553 | 2.618749 | 0.951047 | 0.341581 | 0.443642 | 0        | 1.094824 | 0        | 0        | 4.278221 | 2.009959 |
| 8383  | ACVRL1    | 19.78924 | 2.49043  | 0.757398 | 3.28814  | 0.001009 | 0.003198 | 1.626259 | 3.284471 | 13.2189  | 35.71403 | 29.74221 | 22.10955 |
| 8443  | IPCEF1    | 14.47528 | 2.490165 | 0.76138  | 3.270595 | 0.001073 | 0.003379 | 1.626259 | 5.474118 | 6.261582 | 13.39276 | 29.94755 | 30.14938 |
| 7841  | LOC119627 | 20.1444  | 2.489676 | 0.720471 | 3.455623 | 0.000549 | 0.001861 | 3.252518 | 3.284471 | 11.82743 | 26.78552 | 55.61688 | 20.09959 |
| 11813 | RNF212B   | 6.499128 | 2.488854 | 1.017528 | 2.44598  | 0.014446 | 0.03251  | 2.168345 | 1.642235 | 2.087194 | 15.62489 | 6.417332 | 11.05477 |
| 6409  | ENDOU     | 24.76341 | 2.488803 | 0.626131 | 3.974893 | 7.04E-05 | 0.000292 | 3.794605 | 4.926706 | 13.91463 | 40.17829 | 55.61688 | 30.14938 |
| 7355  | VAX1      | 24.35058 | 2.488667 | 0.688401 | 3.615142 | 0.0003   | 0.001085 | 2.710432 | 5.474118 | 13.91463 | 53.57105 | 51.33866 | 19.09461 |
| 17871 | LOC119627 | 3.015438 | 2.488206 | 1.821907 | 1.365715 | 0.172028 | 0.25591  | 0        | 0        | 2.782925 | 11.16063 | 2.139111 | 2.009959 |
| 12621 | LOC103247 | 6.776558 | 2.488176 | 1.092736 | 2.277015 | 0.022785 | 0.047998 | 2.710432 | 0.547412 | 2.782925 | 15.62489 | 14.97377 | 4.019918 |
| 18931 | FSHR      | 1.898282 | 2.488141 | 2.076392 | 1.1983   | 0.2308   | 0.324098 | 0        | 1.642235 | 0        | 4.464254 | 4.278221 | 1.004979 |
| 15976 | LOC119622 | 4.031475 | 2.48812  | 1.490609 | 1.669197 | 0.095078 | 0.158219 | 2.168345 | 0        | 1.391463 | 8.928508 | 10.69555 | 1.004979 |
| 13182 | RAMP2     | 5.460049 | 2.487967 | 1.144592 | 2.173672 | 0.02973  | 0.059958 | 0.542086 | 1.642235 | 2.782925 | 8.928508 | 12.83466 | 6.029877 |
| 19598 | LOC119624 | 1.499968 | 2.486769 | 2.289008 | 1.086396 | 0.277304 | 0.376052 | 0        | 0        | 1.391463 | 4.464254 | 2.139111 | 1.004979 |
| 19601 | LOC119627 | 1.499968 | 2.486769 | 2.289008 | 1.086396 | 0.277304 | 0.376052 | 0        | 0        | 1.391463 | 4.464254 | 2.139111 | 1.004979 |
| 19602 | LOC119619 | 1.499968 | 2.486769 | 2.289008 | 1.086396 | 0.277304 | 0.376052 | 0        | 0        | 1.391463 | 4.464254 | 2.139111 | 1.004979 |
| 10932 | FAM162B   | 8.893552 | 2.485603 | 0.939983 | 2.644305 | 0.008186 | 0.019907 | 1.626259 | 2.189647 | 4.174388 | 20.08914 | 19.252   | 6.029877 |
| 15587 | CXCL10    | 3.328441 | 2.484127 | 1.434628 | 1.731548 | 0.083354 | 0.142168 | 1.084173 | 0.547412 | 1.391463 | 2.232127 | 10.69555 | 4.019918 |
| 14790 | LOC103233 | 8.2763   | 2.483431 | 1.324571 | 1.874895 | 0.060807 | 0.109301 | 0        | 0        | 7.653045 | 17.85702 | 17.11289 | 7.034856 |
| 16571 | LOC103234 | 3.164035 | 2.483002 | 1.589355 | 1.56227  | 0.11     |          |          |          |          |          |          |          |



|       |           |          |          |          |          |           |           |          |          |          |          |          |          |
|-------|-----------|----------|----------|----------|----------|-----------|-----------|----------|----------|----------|----------|----------|----------|
| 15230 | LOC10324  | 4.047865 | 2.482593 | 1.386672 | 1.790324 | 0.073402  | 0.128128  | 1.626259 | 0.547412 | 1.391463 | 11.16063 | 8.556443 | 1.004979 |
| 16170 | LOC119618 | 3.747393 | 2.482294 | 1.520532 | 1.632516 | 0.102571  | 0.168636  | 1.626259 | 1.642235 | 0        | 2.232127 | 14.97377 | 2.009959 |
| 16436 | LOC10322  | 2.714078 | 2.481985 | 1.56775  | 1.583151 | 0.113387  | 0.183402  | 0.542086 | 0.547412 | 1.391463 | 2.232127 | 8.556443 | 3.014938 |
| 15443 | UPP2      | 3.997997 | 2.481715 | 1.415777 | 1.7529   | 0.079619  | 0.137064  | 0        | 2.189647 | 1.391463 | 6.696381 | 10.69555 | 3.014938 |
| 11365 | LOC10323  | 9.08037  | 2.481582 | 0.975005 | 2.545199 | 0.010922  | 0.025544  | 1.084173 | 1.642235 | 5.565851 | 15.62489 | 23.53022 | 7.034856 |
| 13260 | RXFP3     | 6.366292 | 2.481181 | 1.15107  | 2.155542 | 0.031119  | 0.062391  | 0.542086 | 1.094824 | 4.174388 | 13.39276 | 14.97377 | 4.019918 |
| 13328 | XPNPEP2   | 7.867147 | 2.480796 | 1.157684 | 2.142895 | 0.032122  | 0.064072  | 0        | 1.642235 | 5.565851 | 17.5702  | 17.11289 | 5.024897 |
| 221   | ITGB2     | 2000.845 | 2.480291 | 0.127862 | 19.39816 | 8.00E-84  | 9.62E-82  | 670.5608 | 520.0412 | 635.8985 | 3196.406 | 3238.614 | 3743.549 |
| 19615 | TNFRSF13F | 22.05287 | 2.479221 | 2.288094 | 1.083531 | 0.278573  | 0.377561  | 0        | 0        | 20.17621 | 37.94616 | 47.06043 | 27.13445 |
| 18242 | LOC11962  | 1.896507 | 2.47911  | 1.915855 | 1.293997 | 0.195666  | 0.285155  | 1.084173 | 0.547412 | 0        | 4.464254 | 4.278221 | 1.004979 |
| 89    | ZC3H12A   | 4897.332 | 2.477505 | 0.099179 | 24.98002 | 1.01E-137 | 3.01E-135 | 1458.212 | 1465.421 | 1552.177 | 8263.334 | 7613.095 | 9031.75  |
| 11412 | ADRA1B    | 8.910474 | 2.477338 | 0.97785  | 2.533454 | 0.011294  | 0.026307  | 2.710432 | 0.547412 | 4.87012  | 22.32127 | 14.97377 | 8.039836 |
| 20161 | LOC10324  | 1.447437 | 2.47699  | 2.472909 | 1.00165  | 0.316513  | 0.417323  | 0        | 0        | 1.391463 | 0        | 4.278221 | 3.014938 |
| 20163 | LOC11962  | 1.447437 | 2.47699  | 2.472909 | 1.00165  | 0.316513  | 0.417323  | 0        | 0        | 1.391463 | 0        | 4.278221 | 3.014938 |
| 8928  | PRSS56    | 12.86773 | 2.476326 | 0.789194 | 3.137791 | 0.001702  | 0.005069  | 3.252518 | 1.642235 | 6.957314 | 29.01765 | 19.252   | 17.08465 |
| 13401 | MEIOB     | 5.494249 | 2.475785 | 1.163821 | 2.12729  | 0.033396  | 0.066251  | 0.542086 | 1.094824 | 3.478657 | 13.39276 | 6.417332 | 8.039836 |
| 6741  | ZNF154    | 20.00211 | 2.475308 | 0.644448 | 3.840975 | 0.000123  | 0.000483  | 5.96295  | 3.831883 | 8.348776 | 35.71403 | 47.06043 | 19.09461 |
| 12988 | KLK15     | 7.736054 | 2.474149 | 1.121488 | 2.206131 | 0.027375  | 0.056039  | 0.542086 | 1.642235 | 4.87012  | 26.78552 | 8.556443 | 4.019918 |
| 11192 | FCRLB     | 18.18451 | 2.473246 | 0.957338 | 2.583463 | 0.009781  | 0.023235  | 1.626259 | 0.547412 | 14.61036 | 26.78552 | 53.47777 | 12.05975 |
| 19647 | LOC11961  | 1.484465 | 2.473195 | 2.294542 | 1.07786  | 0.281096  | 0.380341  | 0        | 0        | 1.391463 | 2.232127 | 4.278221 | 1.004979 |
| 19648 | LOC11962  | 1.484465 | 2.473195 | 2.294542 | 1.07786  | 0.281096  | 0.380341  | 0        | 0        | 1.391463 | 2.232127 | 4.278221 | 1.004979 |
| 14182 | PTAFR     | 4.863496 | 2.469817 | 1.247453 | 1.979888 | 0.047716  | 0.089447  | 0.542086 | 0.547412 | 3.478657 | 11.16063 | 6.417332 | 7.034856 |
| 16917 | XCL1      | 4.505926 | 2.468526 | 1.641705 | 1.503635 | 0.132675  | 0.208499  | 0        | 0        | 4.174388 | 11.16063 | 10.69555 | 1.004979 |
| 17699 | LOC11962  | 2.96893  | 2.467811 | 1.782892 | 1.384162 | 0.166309  | 0.249792  | 0        | 0        | 2.782925 | 4.464254 | 8.556443 | 2.009959 |
| 17700 | LOC10322  | 2.96893  | 2.467811 | 1.782892 | 1.384162 | 0.166309  | 0.249792  | 0        | 0        | 2.782925 | 4.464254 | 8.556443 | 2.009959 |
| 20126 | LOC11961  | 1.266641 | 2.466949 | 2.446265 | 1.008455 | 0.313236  | 0.413762  | 0.542086 | 0.547412 | 0        | 2.232127 | 4.278221 | 0        |
| 12460 | LOC11962  | 12.85473 | 2.466154 | 1.068361 | 2.308352 | 0.02098   | 0.044763  | 2.168345 | 0        | 9.740239 | 13.39276 | 42.78221 | 9.044815 |
| 6914  | NFE2      | 20.72812 | 2.46567  | 0.654114 | 3.76948  | 0.000164  | 0.000629  | 2.710432 | 6.568942 | 9.740239 | 46.87467 | 36.36488 | 22.10955 |
| 3854  | AEBP1     | 52.41707 | 2.465162 | 0.448608 | 5.49514  | 3.90E-08  | 2.69E-07  | 13.55216 | 14.78012 | 19.48048 | 84.82083 | 132.6249 | 49.24399 |
| 9145  | FSD2      | 14.5938  | 2.464414 | 0.803352 | 3.067663 | 0.002157  | 0.006272  | 3.794605 | 3.831883 | 5.565851 | 24.5534  | 42.78221 | 7.034856 |
| 6396  | MUC19     | 32.03333 | 2.464304 | 0.618964 | 3.981335 | 6.85E-05  | 0.000285  | 3.794605 | 10.94824 | 14.61036 | 46.87467 | 89.84265 | 26.12947 |
| 839   | ADHFE1    | 197.2438 | 2.463868 | 0.208294 | 11.82877 | 2.77E-32  | 8.78E-31  | 69.38706 | 55.28859 | 57.04997 | 328.1227 | 320.8666 | 352.7478 |
| 8970  | NRROS     | 11.54862 | 2.462735 | 0.788042 | 3.125131 | 0.001777  | 0.005267  | 3.794605 | 2.737059 | 4.174388 | 26.78552 | 10.69555 | 21.10457 |
| 14502 | NMRK2     | 11.97476 | 2.462289 | 1.279182 | 1.924893 | 0.054243  | 0.099438  | 0        | 0        | 11.1317  | 29.01765 | 6.029877 |          |
| 4674  | CLCN1     | 38.45354 | 2.461983 | 0.502272 | 4.901692 | 9.50E-07  | 5.40E-06  | 8.673382 | 9.853413 | 16.69755 | 75.89232 | 83.42532 | 36.17926 |
| 18980 | SERPINB12 | 2.121241 | 2.459808 | 2.070053 | 1.188283 | 0.234722  | 0.328772  | 0        | 0.547412 | 1.391463 | 2.232127 | 8.556443 | 0        |
| 10464 | LOC11962  | 10.08096 | 2.459465 | 0.893273 | 2.753319 | 0.005899  | 0.014988  | 4.336691 | 3.284471 | 1.391463 | 15.62489 | 27.80844 | 8.039836 |
| 10492 | LOC10323  | 9.960545 | 2.459448 | 0.895451 | 2.746602 | 0.006022  | 0.015258  | 3.252518 | 1.094824 | 4.87012  | 26.78552 | 10.69555 | 13.06473 |
| 3511  | LOC11962  | 74.63717 | 2.458919 | 0.420564 | 5.846713 | 5.01E-09  | 3.80E-08  | 11.38381 | 20.80165 | 36.87376 | 142.8561 | 145.4595 | 90.44815 |
| 13582 | TSBP1     | 8.280701 | 2.458836 | 1.175189 | 2.09229  | 0.036413  | 0.071273  | 0        | 2.737059 | 4.87012  | 13.39276 | 25.66933 | 3.014938 |
| 2364  | LOC10322  | 83.5609  | 2.457498 | 0.33559  | 7.322923 | 2.43E-13  | 2.73E-12  | 21.14137 | 21.34906 | 34.78657 | 138.3919 | 171.1289 | 114.5677 |
| 14040 | LOC11962  | 4.66631  | 2.457293 | 1.224487 | 2.006793 | 0.044772  | 0.084789  | 1.626259 | 0.547412 | 2.087194 | 11.16063 | 8.556443 | 4.019918 |
| 10841 | FOXN1     | 9.537604 | 2.456742 | 0.922754 | 2.662401 | 0.007759  | 0.019026  | 1.084173 | 2.189647 | 5.565851 | 20.08914 | 19.252   | 9.044815 |
| 18838 | LOC11962  | 2.990455 | 2.456726 | 2.025413 | 1.212951 | 0.225149  | 0.317739  | 0        | 0        | 2.782925 | 4.464254 | 10.69555 | 0        |
| 12928 | LOC11962  | 14.7024  | 2.454887 | 1.107671 | 2.216261 | 0.026674  | 0.054851  | 0        | 0.547412 | 13.2189  | 35.71403 | 25.66933 | 13.06473 |
| 13764 | LOC11962  | 5.320364 | 2.454852 | 1.194938 | 2.054376 | 0.039939  | 0.077142  | 0.542086 | 2.189647 | 2.087194 | 13.39276 | 10.69555 | 3.014938 |
| 10666 | SIRPB2    | 11.78622 | 2.454658 | 0.909147 | 2.699958 | 0.006935  | 0.017285  | 1.084173 | 1.642235 | 8.348776 | 15.62489 | 29.94755 | 14.06971 |
| 20331 | CUNH9orf1 | 1.468962 | 2.4534   | 2.52447  | 0.971848 | 0.331126  | 0.432945  | 0        | 0        | 1.391463 | 0        | 6.417332 | 1.004979 |
| 20332 | LOC11962  | 1.468962 | 2.4534   | 2.52447  | 0.971848 | 0.331126  | 0.432945  | 0        | 0        | 1.391463 | 0        | 6.417332 | 1.004979 |
| 8504  | MTRNR2L4  | 13.08587 | 2.453061 | 0.753492 | 3.255592 | 0.001132  | 0.003537  | 3.252518 | 3.831883 | 4.87012  | 24.5534  | 29.94755 | 12.05975 |
| 1079  | ZNF467    | 157.4989 | 2.451651 | 0.230913 | 1.016723 | 2.48E-26  | 6.11E-25  | 54.20864 | 42.15071 | 50.09266 | 274.5516 | 239.5804 | 284.4092 |
| 11678 | CNTNAP4   | 19.56678 | 2.451599 | 0.990185 | 2.475899 | 0.01329   | 0.030253  | 0        | 1.642235 | 16.69755 | 46.87467 | 32.08666 | 20.09959 |
| 504   | DRC1      | 310.4107 | 2.450057 | 0.168547 | 14.53636 | 7.13E-48  | 3.76E-46  | 95.4072  | 102.9134 | 89.74935 | 529.0141 | 502.691  | 542.6889 |
| 7589  | GNAT1     | 19.5334  | 2.449964 | 0.694132 | 3.529534 | 0.000416  | 0.001458  | 3.794605 | 2.737059 | 11.82743 | 26.78552 | 44.92132 | 27.13445 |
| 13133 | CLCA1     | 5.887331 | 2.449727 | 1.122437 | 2.182507 | 0.029072  | 0.05885   | 1.626259 | 1.642235 | 2.087194 | 6.696381 | 19.252   | 4.019918 |
| 15962 | LOC10324  | 3.113812 | 2.449132 | 1.464281 | 1.672583 | 0.094409  | 0.157241  | 1.626259 | 0.547412 | 0.695731 | 2.232127 | 8.556443 | 5.024897 |
| 6849  | SCNN1A    | 23.71498 | 2.447506 | 0.644364 | 3.79833  | 0.000146  | 0.000565  | 5.96295  | 4.926706 | 11.1317  | 24.5534  | 70.59065 | 25.12449 |
| 16768 | IQCA1L    | 27.42099 | 2.447147 | 1.598899 | 1.530519 | 0.125888  | 0.199609  | 0        | 3.284471 | 22.2634  | 53.57105 | 66.31243 | 19.09461 |
| 6421  | SSUH2     | 19.88438 | 2.445622 | 0.615635 | 3.97252  | 7.11E-05  | 0.000294  | 7.047123 | 4.926706 | 6.261582 | 46.87467 | 32.08666 | 22.10955 |
| 4375  | LOC11962  | 39.39777 | 2.444486 | 0.47967  | 5.096179 | 3.47E-07  | 2.11E-06  | 9.757555 | 8.211177 | 18.78475 | 66.96381 | 83.42532 | 49.24399 |
| 8413  | PLEKHD1   | 19.6305  | 2.444016 | 0.745484 | 3.278428 | 0.001044  | 0.003299  | 4.336691 | 2.737059 | 11.1317  | 46.87467 | 40.6431  | 12.05975 |
| 15316 | LOC10322  | 5.16004  | 2.443842 | 1.375437 | 1.776775 | 0.075605  | 0.131225  | 0        | 3.284471 | 1.391463 | 17.85702 | 6.417332 | 2.009959 |
| 15317 | CCR7      | 5.16004  | 2.443842 | 1.375437 | 1.776775 | 0.075605  | 0.131225  | 0        | 3.284471 | 1.391463 | 17.85702 | 6.417332 | 2.009959 |
| 6832  | LOC11962  | 20.02527 | 2.443567 | 0.642202 | 3.804983 | 0.000142  | 0.000552  | 7.047123 | 7.663765 | 3.478657 | 37.94616 | 44.92132 | 19.09461 |
| 5823  | APLNR     | 32.33298 | 2.442569 | 0.573194 | 4.261329 | 2.03E-05  | 9.28E-05  | 4.878777 | 7.663765 | 18.08902 | 33.4819  | 70.59065 | 59.29379 |
| 15408 | LOC10321  | 4.073473 | 2.442552 | 1.388682 | 1.7589   | 0.078595  | 0.135607  | 1.084173 | 0.547412 | 2.087194 | 11.16063 | 8.556443 | 1.004979 |
| 230   | CNTNAP2   | 1084.6   | 2.442467 | 0.128454 | 19.01436 | 1.30E-80  | 1.50E-78  | 2948.408 | 4117.632 | 3045.912 | 18189.6  | 17910.77 | 18868.49 |
| 4869  | COL1A2    | 33.10871 | 2.442022 | 0.513061 | 4.759709 | 1.94E-06  | 1.06E-05  | 7.047123 | 10.40082 | 13.2189  | 55.80317 | 77.00798 | 35.17428 |
| 385   | CEBPD     | 1328.73  | 2.441656 | 0.153261 | 15.93133 | 3.84E-57  | 2.65E-55  | 364.8241 | 517.8516 | 355.5187 | 2395.072 | 2124.137 | 2214.975 |
| 5974  | KCNN4     | 60.5526  | 2.439283 | 0.584226 | 4.175239 | 2.98E-05  | 0.000132  | 9.215468 | 6.568942 | 41.04815 | 107.1421 | 139.0422 | 60.29877 |
| 15802 | LOC11962  | 4.785983 | 2.43923  | 1.434083 | 1.700899 | 0.088962  | 0.149668  | 0.542086 | 0.547412 | 3.478657 | 0        | 17.11289 | 7.034856 |
| 13253 | DPPA2     | 8.323812 | 2.439116 | 1        |          |           |           |          |          |          |          |          |          |



|       |           |          |          |          |          |          |          |          |          |          |          |          |          |
|-------|-----------|----------|----------|----------|----------|----------|----------|----------|----------|----------|----------|----------|----------|
| 11415 | IRF7      | 7.753198 | 2.436908 | 0.962119 | 2.532854 | 0.011314 | 0.026349 | 2.710432 | 1.094824 | 3.478657 | 8.928508 | 19.252   | 11.05477 |
| 9240  | NCAN      | 14.71111 | 2.436223 | 0.800094 | 3.044922 | 0.002327 | 0.006697 | 2.168345 | 3.831883 | 7.653045 | 33.4819  | 32.08666 | 9.044815 |
| 235   | LRRCE     | 1657.708 | 2.43559  | 0.129003 | 18.88004 | 1.66E-79 | 1.88E-77 | 583.2849 | 448.8777 | 521.1028 | 2685.249 | 2637.523 | 3070.212 |
| 11370 | LOC119620 | 8.607798 | 2.435572 | 0.957371 | 2.544021 | 0.010958 | 0.025623 | 2.168345 | 1.094824 | 4.87012  | 8.928508 | 23.53022 | 11.05477 |
| 2604  | PTPN7     | 92.1675  | 2.434654 | 0.348954 | 6.976996 | 3.02E-12 | 3.08E-11 | 25.47806 | 17.51718 | 43.83108 | 165.1774 | 158.2942 | 142.7071 |
| 19409 | LOC119620 | 14.79558 | 2.43439  | 2.179282 | 1.117061 | 0.263968 | 0.361654 | 0        | 0        | 13.91463 | 24.5534  | 34.22577 | 16.07967 |
| 14280 | CRYBB3    | 5.577523 | 2.432914 | 1.238043 | 1.965129 | 0.049399 | 0.091938 | 0.542086 | 0.547412 | 4.174388 | 15.62489 | 8.556443 | 4.019918 |
| 6249  | GNG2      | 29.40353 | 2.431456 | 0.600041 | 4.05215  | 5.07E-05 | 0.000216 | 5.420864 | 4.379295 | 18.08902 | 60.26743 | 47.06043 | 41.20416 |
| 17438 | LOC119619 | 2.483946 | 2.431415 | 1.712089 | 1.420145 | 0.155565 | 0.237166 | 1.084173 | 0.547412 | 0.695731 | 0        | 8.556443 | 4.019918 |
| 15024 | LOC119620 | 4.4027   | 2.431363 | 1.32944  | 1.828863 | 0.06742  | 0.1193   | 0        | 2.737059 | 1.391463 | 6.696381 | 8.556443 | 7.034856 |
| 13054 | LOC103227 | 5.943056 | 2.429806 | 1.106698 | 2.195546 | 0.028124 | 0.057277 | 1.626259 | 1.094824 | 2.782925 | 11.16063 | 14.97377 | 4.019918 |
| 12671 | TGM3      | 8.73952  | 2.429469 | 1.071978 | 2.266342 | 0.02343  | 0.049159 | 2.710432 | 0.547412 | 4.87012  | 15.62489 | 25.66933 | 3.014938 |
| 13330 | ACTA2     | 6.78304  | 2.429289 | 1.133897 | 2.142426 | 0.032159 | 0.064138 | 0.542086 | 1.642235 | 4.174388 | 8.928508 | 21.39111 | 4.019918 |
| 18696 | LOC119620 | 2.118413 | 2.427531 | 1.974868 | 1.229211 | 0.218993 | 0.311399 | 0        | 0        | 2.087194 | 4.464254 | 2.139111 | 4.019918 |
| 6779  | UNC5CL    | 18.56814 | 2.425152 | 0.634025 | 3.825012 | 0.000131 | 0.000513 | 6.505036 | 3.284471 | 7.653045 | 33.4819  | 36.36488 | 24.11951 |
| 20111 | LOC103225 | 1.24831  | 2.424794 | 2.398479 | 1.010972 | 0.31203  | 0.412466 | 0.542086 | 0        | 0.695731 | 2.232127 | 0        | 4.019918 |
| 11372 | NKX2-1    | 13.06945 | 2.424484 | 0.95328  | 2.543307 | 0.010981 | 0.025671 | 0.542086 | 2.737059 | 9.044508 | 31.24978 | 27.80844 | 7.034856 |
| 8017  | LOC103230 | 15.00384 | 2.424425 | 0.711521 | 3.407382 | 0.000656 | 0.002175 | 2.710432 | 3.831883 | 7.653045 | 26.78552 | 29.94755 | 19.09461 |
| 19381 | LOC119620 | 2.133915 | 2.424106 | 2.16357  | 1.120419 | 0.262535 | 0.36012  | 0        | 0        | 2.087194 | 6.696381 | 0        | 4.019918 |
| 26587 | TRNAN-GL  | 0.167497 | 2.421735 | 4.072558 | 0.594647 | 0.552079 | NA       | 0        | 0        | 0        | 0        | 0        | 1.004979 |
| 26605 | LOC119620 | 0.167497 | 2.421735 | 4.072558 | 0.594647 | 0.552079 | NA       | 0        | 0        | 0        | 0        | 0        | 1.004979 |
| 26614 | LOC103220 | 0.167497 | 2.421735 | 4.072558 | 0.594647 | 0.552079 | NA       | 0        | 0        | 0        | 0        | 0        | 1.004979 |
| 26631 | LOC119620 | 0.167497 | 2.421735 | 4.072558 | 0.594647 | 0.552079 | NA       | 0        | 0        | 0        | 0        | 0        | 1.004979 |
| 26634 | LOC119620 | 0.167497 | 2.421735 | 4.072558 | 0.594647 | 0.552079 | NA       | 0        | 0        | 0        | 0        | 0        | 1.004979 |
| 26668 | LOC119620 | 0.167497 | 2.421735 | 4.072558 | 0.594647 | 0.552079 | NA       | 0        | 0        | 0        | 0        | 0        | 1.004979 |
| 26728 | ACTL7A    | 0.167497 | 2.421735 | 4.072558 | 0.594647 | 0.552079 | NA       | 0        | 0        | 0        | 0        | 0        | 1.004979 |
| 26747 | LOC119619 | 0.167497 | 2.421735 | 4.072558 | 0.594647 | 0.552079 | NA       | 0        | 0        | 0        | 0        | 0        | 1.004979 |
| 26752 | LOC119620 | 0.167497 | 2.421735 | 4.072558 | 0.594647 | 0.552079 | NA       | 0        | 0        | 0        | 0        | 0        | 1.004979 |
| 26761 | LOC119620 | 0.167497 | 2.421735 | 4.072558 | 0.594647 | 0.552079 | NA       | 0        | 0        | 0        | 0        | 0        | 1.004979 |
| 26777 | LOC119620 | 0.167497 | 2.421735 | 4.072558 | 0.594647 | 0.552079 | NA       | 0        | 0        | 0        | 0        | 0        | 1.004979 |
| 26872 | LOC119620 | 0.167497 | 2.421735 | 4.072558 | 0.594647 | 0.552079 | NA       | 0        | 0        | 0        | 0        | 0        | 1.004979 |
| 26875 | LOC119620 | 0.167497 | 2.421735 | 4.072558 | 0.594647 | 0.552079 | NA       | 0        | 0        | 0        | 0        | 0        | 1.004979 |
| 26888 | LOC103230 | 0.167497 | 2.421735 | 4.072558 | 0.594647 | 0.552079 | NA       | 0        | 0        | 0        | 0        | 0        | 1.004979 |
| 26900 | LOC103230 | 0.167497 | 2.421735 | 4.072558 | 0.594647 | 0.552079 | NA       | 0        | 0        | 0        | 0        | 0        | 1.004979 |
| 26924 | LOC103220 | 0.167497 | 2.421735 | 4.072558 | 0.594647 | 0.552079 | NA       | 0        | 0        | 0        | 0        | 0        | 1.004979 |
| 26937 | SPRR2G    | 0.167497 | 2.421735 | 4.072558 | 0.594647 | 0.552079 | NA       | 0        | 0        | 0        | 0        | 0        | 1.004979 |
| 26972 | LOC119620 | 0.167497 | 2.421735 | 4.072558 | 0.594647 | 0.552079 | NA       | 0        | 0        | 0        | 0        | 0        | 1.004979 |
| 26998 | LOC119620 | 0.167497 | 2.421735 | 4.072558 | 0.594647 | 0.552079 | NA       | 0        | 0        | 0        | 0        | 0        | 1.004979 |
| 27002 | LOC119620 | 0.167497 | 2.421735 | 4.072558 | 0.594647 | 0.552079 | NA       | 0        | 0        | 0        | 0        | 0        | 1.004979 |
| 27011 | LOC103219 | 0.167497 | 2.421735 | 4.072558 | 0.594647 | 0.552079 | NA       | 0        | 0        | 0        | 0        | 0        | 1.004979 |
| 27034 | LOC119620 | 0.167497 | 2.421735 | 4.072558 | 0.594647 | 0.552079 | NA       | 0        | 0        | 0        | 0        | 0        | 1.004979 |
| 27035 | LOC103230 | 0.167497 | 2.421735 | 4.072558 | 0.594647 | 0.552079 | NA       | 0        | 0        | 0        | 0        | 0        | 1.004979 |
| 27041 | LOC103230 | 0.167497 | 2.421735 | 4.072558 | 0.594647 | 0.552079 | NA       | 0        | 0        | 0        | 0        | 0        | 1.004979 |
| 27042 | LOC119620 | 0.167497 | 2.421735 | 4.072558 | 0.594647 | 0.552079 | NA       | 0        | 0        | 0        | 0        | 0        | 1.004979 |
| 27072 | LOC103230 | 0.167497 | 2.421735 | 4.072558 | 0.594647 | 0.552079 | NA       | 0        | 0        | 0        | 0        | 0        | 1.004979 |
| 27081 | LOC103230 | 0.167497 | 2.421735 | 4.072558 | 0.594647 | 0.552079 | NA       | 0        | 0        | 0        | 0        | 0        | 1.004979 |
| 27125 | LOC119620 | 0.167497 | 2.421735 | 4.072558 | 0.594647 | 0.552079 | NA       | 0        | 0        | 0        | 0        | 0        | 1.004979 |
| 27195 | TRNAE-CU  | 0.167497 | 2.421735 | 4.072558 | 0.594647 | 0.552079 | NA       | 0        | 0        | 0        | 0        | 0        | 1.004979 |
| 27215 | LOC119620 | 0.167497 | 2.421735 | 4.072558 | 0.594647 | 0.552079 | NA       | 0        | 0        | 0        | 0        | 0        | 1.004979 |
| 27224 | LOC103240 | 0.167497 | 2.421735 | 4.072558 | 0.594647 | 0.552079 | NA       | 0        | 0        | 0        | 0        | 0        | 1.004979 |
| 27255 | LOC119620 | 0.167497 | 2.421735 | 4.072558 | 0.594647 | 0.552079 | NA       | 0        | 0        | 0        | 0        | 0        | 1.004979 |
| 27258 | LOC103217 | 0.167497 | 2.421735 | 4.072558 | 0.594647 | 0.552079 | NA       | 0        | 0        | 0        | 0        | 0        | 1.004979 |
| 27265 | LOC119620 | 0.167497 | 2.421735 | 4.072558 | 0.594647 | 0.552079 | NA       | 0        | 0        | 0        | 0        | 0        | 1.004979 |
| 27288 | LOC119620 | 0.167497 | 2.421735 | 4.072558 | 0.594647 | 0.552079 | NA       | 0        | 0        | 0        | 0        | 0        | 1.004979 |
| 27304 | LOC119620 | 0.167497 | 2.421735 | 4.072558 | 0.594647 | 0.552079 | NA       | 0        | 0        | 0        | 0        | 0        | 1.004979 |
| 27364 | LOC119620 | 0.167497 | 2.421735 | 4.072558 | 0.594647 | 0.552079 | NA       | 0        | 0        | 0        | 0        | 0        | 1.004979 |
| 27386 | LOC119620 | 0.167497 | 2.421735 | 4.072558 | 0.594647 | 0.552079 | NA       | 0        | 0        | 0        | 0        | 0        | 1.004979 |
| 27396 | LOC119620 | 0.167497 | 2.421735 | 4.072558 | 0.594647 | 0.552079 | NA       | 0        | 0        | 0        | 0        | 0        | 1.004979 |
| 27435 | LOC119620 | 0.167497 | 2.421735 | 4.072558 | 0.594647 | 0.552079 | NA       | 0        | 0        | 0        | 0        | 0        | 1.004979 |
| 27454 | RTP3      | 0.167497 | 2.421735 | 4.072558 | 0.594647 | 0.552079 | NA       | 0        | 0        | 0        | 0        | 0        | 1.004979 |
| 27461 | LOC119620 | 0.167497 | 2.421735 | 4.072558 | 0.594647 | 0.552079 | NA       | 0        | 0        | 0        | 0        | 0        | 1.004979 |
| 27463 | LOC119620 | 0.167497 | 2.421735 | 4.072558 | 0.594647 | 0.552079 | NA       | 0        | 0        | 0        | 0        | 0        | 1.004979 |
| 27477 | LOC103220 | 0.167497 | 2.421735 | 4.072558 | 0.594647 | 0.552079 | NA       | 0        | 0        | 0        | 0        | 0        | 1.004979 |
| 27508 | LOC119620 | 0.167497 | 2.421735 | 4.072558 | 0.594647 | 0.552079 | NA       | 0        | 0        | 0        | 0        | 0        | 1.004979 |
| 27567 | LOC119620 | 0.167497 | 2.421735 | 4.072558 | 0.594647 | 0.552079 | NA       | 0        | 0        | 0        | 0        | 0        | 1.004979 |
| 27568 | LOC119620 | 0.167497 | 2.421735 | 4.072558 | 0.594647 | 0.552079 | NA       | 0        | 0        | 0        | 0        | 0        | 1.004979 |
| 27571 | LOC119620 | 0.167497 | 2.421735 | 4.072558 | 0.594647 | 0.552079 | NA       | 0        | 0        | 0        | 0        | 0        | 1.004979 |
| 27606 | LOC103247 | 0.167497 | 2.421735 | 4.072558 | 0.594647 | 0.552079 | NA       | 0        | 0        | 0        | 0        | 0        | 1.004979 |
| 27607 | LOC103247 | 0.167497 | 2.421735 | 4.072558 | 0.594647 | 0.552079 | NA       | 0        | 0        | 0        | 0        | 0        | 1.004979 |
| 27629 | LOC119620 | 0.167497 | 2.421735 | 4.072558 | 0.594647 | 0.552079 | NA       | 0        | 0        | 0        | 0        | 0        | 1.004979 |
| 27634 | LOC119620 | 0.167497 | 2.421735 | 4.072558 | 0.594647 | 0.552079 | NA       | 0        | 0        | 0        | 0        | 0        | 1.004979 |
| 27659 | TRNAT-CG  | 0.167497 | 2.421735 | 4.072558 | 0.594647 | 0.552079 | NA       | 0        | 0        | 0        | 0        | 0        | 1.004979 |
| 27682 | LOC103227 | 0.167497 | 2.421735 | 4.072558 | 0.594647 | 0.552079 | NA       | 0        | 0        | 0        | 0        | 0        | 1.004979 |
| 27708 | LOC119627 | 0.167497 | 2.421735 | 4.072558 | 0.594647 | 0.552079 | NA       | 0        | 0        | 0        | 0        | 0        | 1.004979 |



|       |           |          |          |          |          |          |    |   |   |   |   |   |          |
|-------|-----------|----------|----------|----------|----------|----------|----|---|---|---|---|---|----------|
| 27714 | LOC11962: | 0.167497 | 2.421735 | 4.072558 | 0.594647 | 0.552079 | NA | 0 | 0 | 0 | 0 | 0 | 1.004979 |
| 27724 | LOC11962: | 0.167497 | 2.421735 | 4.072558 | 0.594647 | 0.552079 | NA | 0 | 0 | 0 | 0 | 0 | 1.004979 |
| 27725 | LOC11962: | 0.167497 | 2.421735 | 4.072558 | 0.594647 | 0.552079 | NA | 0 | 0 | 0 | 0 | 0 | 1.004979 |
| 27734 | LOC11962: | 0.167497 | 2.421735 | 4.072558 | 0.594647 | 0.552079 | NA | 0 | 0 | 0 | 0 | 0 | 1.004979 |
| 27735 | LOC10322: | 0.167497 | 2.421735 | 4.072558 | 0.594647 | 0.552079 | NA | 0 | 0 | 0 | 0 | 0 | 1.004979 |
| 27758 | LOC10322: | 0.167497 | 2.421735 | 4.072558 | 0.594647 | 0.552079 | NA | 0 | 0 | 0 | 0 | 0 | 1.004979 |
| 27761 | LOC11962: | 0.167497 | 2.421735 | 4.072558 | 0.594647 | 0.552079 | NA | 0 | 0 | 0 | 0 | 0 | 1.004979 |
| 27775 | LOC10321: | 0.167497 | 2.421735 | 4.072558 | 0.594647 | 0.552079 | NA | 0 | 0 | 0 | 0 | 0 | 1.004979 |
| 27790 | LOC11962: | 0.167497 | 2.421735 | 4.072558 | 0.594647 | 0.552079 | NA | 0 | 0 | 0 | 0 | 0 | 1.004979 |
| 27805 | LOC11962: | 0.167497 | 2.421735 | 4.072558 | 0.594647 | 0.552079 | NA | 0 | 0 | 0 | 0 | 0 | 1.004979 |
| 27807 | LOC11962: | 0.167497 | 2.421735 | 4.072558 | 0.594647 | 0.552079 | NA | 0 | 0 | 0 | 0 | 0 | 1.004979 |
| 27882 | LOC11962: | 0.167497 | 2.421735 | 4.072558 | 0.594647 | 0.552079 | NA | 0 | 0 | 0 | 0 | 0 | 1.004979 |
| 27902 | LOC11962: | 0.167497 | 2.421735 | 4.072558 | 0.594647 | 0.552079 | NA | 0 | 0 | 0 | 0 | 0 | 1.004979 |
| 27931 | LOC11962: | 0.167497 | 2.421735 | 4.072558 | 0.594647 | 0.552079 | NA | 0 | 0 | 0 | 0 | 0 | 1.004979 |
| 27939 | LOC11962: | 0.167497 | 2.421735 | 4.072558 | 0.594647 | 0.552079 | NA | 0 | 0 | 0 | 0 | 0 | 1.004979 |
| 27942 | LOC11962: | 0.167497 | 2.421735 | 4.072558 | 0.594647 | 0.552079 | NA | 0 | 0 | 0 | 0 | 0 | 1.004979 |
| 27990 | ADAMTS7   | 0.167497 | 2.421735 | 4.072558 | 0.594647 | 0.552079 | NA | 0 | 0 | 0 | 0 | 0 | 1.004979 |
| 27994 | LOC10322: | 0.167497 | 2.421735 | 4.072558 | 0.594647 | 0.552079 | NA | 0 | 0 | 0 | 0 | 0 | 1.004979 |
| 28013 | LOC11961: | 0.167497 | 2.421735 | 4.072558 | 0.594647 | 0.552079 | NA | 0 | 0 | 0 | 0 | 0 | 1.004979 |
| 28020 | LOC11961: | 0.167497 | 2.421735 | 4.072558 | 0.594647 | 0.552079 | NA | 0 | 0 | 0 | 0 | 0 | 1.004979 |
| 28023 | LOC11961: | 0.167497 | 2.421735 | 4.072558 | 0.594647 | 0.552079 | NA | 0 | 0 | 0 | 0 | 0 | 1.004979 |
| 28027 | LOC10322: | 0.167497 | 2.421735 | 4.072558 | 0.594647 | 0.552079 | NA | 0 | 0 | 0 | 0 | 0 | 1.004979 |
| 28034 | LOC11961: | 0.167497 | 2.421735 | 4.072558 | 0.594647 | 0.552079 | NA | 0 | 0 | 0 | 0 | 0 | 1.004979 |
| 28054 | LOC11961: | 0.167497 | 2.421735 | 4.072558 | 0.594647 | 0.552079 | NA | 0 | 0 | 0 | 0 | 0 | 1.004979 |
| 28063 | LOC11961: | 0.167497 | 2.421735 | 4.072558 | 0.594647 | 0.552079 | NA | 0 | 0 | 0 | 0 | 0 | 1.004979 |
| 28082 | LOC11961: | 0.167497 | 2.421735 | 4.072558 | 0.594647 | 0.552079 | NA | 0 | 0 | 0 | 0 | 0 | 1.004979 |
| 28090 | LOC11961: | 0.167497 | 2.421735 | 4.072558 | 0.594647 | 0.552079 | NA | 0 | 0 | 0 | 0 | 0 | 1.004979 |
| 28092 | LOC10324: | 0.167497 | 2.421735 | 4.072558 | 0.594647 | 0.552079 | NA | 0 | 0 | 0 | 0 | 0 | 1.004979 |
| 28117 | LOC11961: | 0.167497 | 2.421735 | 4.072558 | 0.594647 | 0.552079 | NA | 0 | 0 | 0 | 0 | 0 | 1.004979 |
| 28181 | DEFB108B  | 0.167497 | 2.421735 | 4.072558 | 0.594647 | 0.552079 | NA | 0 | 0 | 0 | 0 | 0 | 1.004979 |
| 28197 | LOC11961: | 0.167497 | 2.421735 | 4.072558 | 0.594647 | 0.552079 | NA | 0 | 0 | 0 | 0 | 0 | 1.004979 |
| 28209 | LOC11961: | 0.167497 | 2.421735 | 4.072558 | 0.594647 | 0.552079 | NA | 0 | 0 | 0 | 0 | 0 | 1.004979 |
| 28210 | LOC11961: | 0.167497 | 2.421735 | 4.072558 | 0.594647 | 0.552079 | NA | 0 | 0 | 0 | 0 | 0 | 1.004979 |
| 28277 | LOC11961: | 0.167497 | 2.421735 | 4.072558 | 0.594647 | 0.552079 | NA | 0 | 0 | 0 | 0 | 0 | 1.004979 |
| 28289 | LOC10322: | 0.167497 | 2.421735 | 4.072558 | 0.594647 | 0.552079 | NA | 0 | 0 | 0 | 0 | 0 | 1.004979 |
| 28318 | LOC11961: | 0.167497 | 2.421735 | 4.072558 | 0.594647 | 0.552079 | NA | 0 | 0 | 0 | 0 | 0 | 1.004979 |
| 28352 | LOC11961: | 0.167497 | 2.421735 | 4.072558 | 0.594647 | 0.552079 | NA | 0 | 0 | 0 | 0 | 0 | 1.004979 |
| 28362 | LOC11961: | 0.167497 | 2.421735 | 4.072558 | 0.594647 | 0.552079 | NA | 0 | 0 | 0 | 0 | 0 | 1.004979 |
| 28377 | LOC11961: | 0.167497 | 2.421735 | 4.072558 | 0.594647 | 0.552079 | NA | 0 | 0 | 0 | 0 | 0 | 1.004979 |
| 28382 | LOC11961: | 0.167497 | 2.421735 | 4.072558 | 0.594647 | 0.552079 | NA | 0 | 0 | 0 | 0 | 0 | 1.004979 |
| 28434 | LOC10323: | 0.167497 | 2.421735 | 4.072558 | 0.594647 | 0.552079 | NA | 0 | 0 | 0 | 0 | 0 | 1.004979 |
| 28439 | LOC11961: | 0.167497 | 2.421735 | 4.072558 | 0.594647 | 0.552079 | NA | 0 | 0 | 0 | 0 | 0 | 1.004979 |
| 28448 | LOC11962: | 0.167497 | 2.421735 | 4.072558 | 0.594647 | 0.552079 | NA | 0 | 0 | 0 | 0 | 0 | 1.004979 |
| 28499 | LOC11962: | 0.167497 | 2.421735 | 4.072558 | 0.594647 | 0.552079 | NA | 0 | 0 | 0 | 0 | 0 | 1.004979 |
| 28516 | LOC11962: | 0.167497 | 2.421735 | 4.072558 | 0.594647 | 0.552079 | NA | 0 | 0 | 0 | 0 | 0 | 1.004979 |
| 28519 | LOC11962: | 0.167497 | 2.421735 | 4.072558 | 0.594647 | 0.552079 | NA | 0 | 0 | 0 | 0 | 0 | 1.004979 |
| 28524 | LOC11962: | 0.167497 | 2.421735 | 4.072558 | 0.594647 | 0.552079 | NA | 0 | 0 | 0 | 0 | 0 | 1.004979 |
| 28543 | LOC11962: | 0.167497 | 2.421735 | 4.072558 | 0.594647 | 0.552079 | NA | 0 | 0 | 0 | 0 | 0 | 1.004979 |
| 28564 | LOC11962: | 0.167497 | 2.421735 | 4.072558 | 0.594647 | 0.552079 | NA | 0 | 0 | 0 | 0 | 0 | 1.004979 |
| 28580 | LOC10323: | 0.167497 | 2.421735 | 4.072558 | 0.594647 | 0.552079 | NA | 0 | 0 | 0 | 0 | 0 | 1.004979 |
| 28607 | LOC11962: | 0.167497 | 2.421735 | 4.072558 | 0.594647 | 0.552079 | NA | 0 | 0 | 0 | 0 | 0 | 1.004979 |
| 28609 | LOC11962: | 0.167497 | 2.421735 | 4.072558 | 0.594647 | 0.552079 | NA | 0 | 0 | 0 | 0 | 0 | 1.004979 |
| 28624 | LOC10321: | 0.167497 | 2.421735 | 4.072558 | 0.594647 | 0.552079 | NA | 0 | 0 | 0 | 0 | 0 | 1.004979 |
| 28654 | LOC11962: | 0.167497 | 2.421735 | 4.072558 | 0.594647 | 0.552079 | NA | 0 | 0 | 0 | 0 | 0 | 1.004979 |
| 28707 | LOC11962: | 0.167497 | 2.421735 | 4.072558 | 0.594647 | 0.552079 | NA | 0 | 0 | 0 | 0 | 0 | 1.004979 |
| 28709 | LOC11962: | 0.167497 | 2.421735 | 4.072558 | 0.594647 | 0.552079 | NA | 0 | 0 | 0 | 0 | 0 | 1.004979 |
| 28715 | LOC11962: | 0.167497 | 2.421735 | 4.072558 | 0.594647 | 0.552079 | NA | 0 | 0 | 0 | 0 | 0 | 1.004979 |
| 28722 | LOC10323: | 0.167497 | 2.421735 | 4.072558 | 0.594647 | 0.552079 | NA | 0 | 0 | 0 | 0 | 0 | 1.004979 |
| 28765 | LOC10323: | 0.167497 | 2.421735 | 4.072558 | 0.594647 | 0.552079 | NA | 0 | 0 | 0 | 0 | 0 | 1.004979 |
| 28818 | LOC10322: | 0.167497 | 2.421735 | 4.072558 | 0.594647 | 0.552079 | NA | 0 | 0 | 0 | 0 | 0 | 1.004979 |
| 28824 | LOC11962: | 0.167497 | 2.421735 | 4.072558 | 0.594647 | 0.552079 | NA | 0 | 0 | 0 | 0 | 0 | 1.004979 |
| 28844 | LOC11962: | 0.167497 | 2.421735 | 4.072558 | 0.594647 | 0.552079 | NA | 0 | 0 | 0 | 0 | 0 | 1.004979 |
| 28845 | LOC11962: | 0.167497 | 2.421735 | 4.072558 | 0.594647 | 0.552079 | NA | 0 | 0 | 0 | 0 | 0 | 1.004979 |
| 28869 | LOC11962: | 0.167497 | 2.421735 | 4.072558 | 0.594647 | 0.552079 | NA | 0 | 0 | 0 | 0 | 0 | 1.004979 |
| 28908 | LOC11962: | 0.167497 | 2.421735 | 4.072558 | 0.594647 | 0.552079 | NA | 0 | 0 | 0 | 0 | 0 | 1.004979 |
| 28913 | LOC10322: | 0.167497 | 2.421735 | 4.072558 | 0.594647 | 0.552079 | NA | 0 | 0 | 0 | 0 | 0 | 1.004979 |
| 28916 | LOC10322: | 0.167497 | 2.421735 | 4.072558 | 0.594647 | 0.552079 | NA | 0 | 0 | 0 | 0 | 0 | 1.004979 |
| 28929 | TRNAC-AC  | 0.167497 | 2.421735 | 4.072558 | 0.594647 | 0.552079 | NA | 0 | 0 | 0 | 0 | 0 | 1.004979 |
| 28951 | LOC10323: | 0.167497 | 2.421735 | 4.072558 | 0.594647 | 0.552079 | NA | 0 | 0 | 0 | 0 | 0 | 1.004979 |
| 28959 | LOC11962: | 0.167497 | 2.421735 | 4.072558 | 0.594647 | 0.552079 | NA | 0 | 0 | 0 | 0 | 0 | 1.004979 |
| 28965 | LOC11962: | 0.167497 | 2.421735 | 4.072558 | 0.594647 | 0.552079 | NA | 0 | 0 | 0 | 0 | 0 | 1.004979 |
| 28968 | LOC11962: | 0.167497 | 2.421735 | 4.072558 | 0.594647 | 0.552079 | NA | 0 | 0 | 0 | 0 | 0 | 1.004979 |
| 28985 | LOC11962: | 0.167497 | 2.421735 | 4.072558 | 0.594647 | 0.552079 | NA | 0 | 0 | 0 | 0 | 0 | 1.004979 |
| 29007 | LOC11962: | 0.167497 | 2.421735 | 4.072558 | 0.594647 | 0.552079 | NA | 0 | 0 | 0 | 0 | 0 | 1.004979 |



|       |           |          |          |          |          |           |           |          |          |          |          |          |          |
|-------|-----------|----------|----------|----------|----------|-----------|-----------|----------|----------|----------|----------|----------|----------|
| 29032 | LOC103243 | 0.167497 | 2.421735 | 4.072558 | 0.594647 | 0.552079  | NA        | 0        | 0        | 0        | 0        | 0        | 1.004979 |
| 29045 | LOC119622 | 0.167497 | 2.421735 | 4.072558 | 0.594647 | 0.552079  | NA        | 0        | 0        | 0        | 0        | 0        | 1.004979 |
| 29051 | LOC103243 | 0.167497 | 2.421735 | 4.072558 | 0.594647 | 0.552079  | NA        | 0        | 0        | 0        | 0        | 0        | 1.004979 |
| 29052 | LOC103243 | 0.167497 | 2.421735 | 4.072558 | 0.594647 | 0.552079  | NA        | 0        | 0        | 0        | 0        | 0        | 1.004979 |
| 29069 | CUNH17or  | 0.167497 | 2.421735 | 4.072558 | 0.594647 | 0.552079  | NA        | 0        | 0        | 0        | 0        | 0        | 1.004979 |
| 29091 | LOC119622 | 0.167497 | 2.421735 | 4.072558 | 0.594647 | 0.552079  | NA        | 0        | 0        | 0        | 0        | 0        | 1.004979 |
| 29093 | LOC119622 | 0.167497 | 2.421735 | 4.072558 | 0.594647 | 0.552079  | NA        | 0        | 0        | 0        | 0        | 0        | 1.004979 |
| 29108 | LOC103243 | 0.167497 | 2.421735 | 4.072558 | 0.594647 | 0.552079  | NA        | 0        | 0        | 0        | 0        | 0        | 1.004979 |
| 29111 | LOC103243 | 0.167497 | 2.421735 | 4.072558 | 0.594647 | 0.552079  | NA        | 0        | 0        | 0        | 0        | 0        | 1.004979 |
| 29117 | LOC103243 | 0.167497 | 2.421735 | 4.072558 | 0.594647 | 0.552079  | NA        | 0        | 0        | 0        | 0        | 0        | 1.004979 |
| 29120 | LOC103243 | 0.167497 | 2.421735 | 4.072558 | 0.594647 | 0.552079  | NA        | 0        | 0        | 0        | 0        | 0        | 1.004979 |
| 29131 | LOC103243 | 0.167497 | 2.421735 | 4.072558 | 0.594647 | 0.552079  | NA        | 0        | 0        | 0        | 0        | 0        | 1.004979 |
| 29149 | LOC119622 | 0.167497 | 2.421735 | 4.072558 | 0.594647 | 0.552079  | NA        | 0        | 0        | 0        | 0        | 0        | 1.004979 |
| 29152 | LOC119622 | 0.167497 | 2.421735 | 4.072558 | 0.594647 | 0.552079  | NA        | 0        | 0        | 0        | 0        | 0        | 1.004979 |
| 29155 | SMR3B     | 0.167497 | 2.421735 | 4.072558 | 0.594647 | 0.552079  | NA        | 0        | 0        | 0        | 0        | 0        | 1.004979 |
| 29159 | LOC103233 | 0.167497 | 2.421735 | 4.072558 | 0.594647 | 0.552079  | NA        | 0        | 0        | 0        | 0        | 0        | 1.004979 |
| 29177 | LOC119618 | 0.167497 | 2.421735 | 4.072558 | 0.594647 | 0.552079  | NA        | 0        | 0        | 0        | 0        | 0        | 1.004979 |
| 29180 | LOC119622 | 0.167497 | 2.421735 | 4.072558 | 0.594647 | 0.552079  | NA        | 0        | 0        | 0        | 0        | 0        | 1.004979 |
| 29192 | LOC119622 | 0.167497 | 2.421735 | 4.072558 | 0.594647 | 0.552079  | NA        | 0        | 0        | 0        | 0        | 0        | 1.004979 |
| 29211 | LOC103243 | 0.167497 | 2.421735 | 4.072558 | 0.594647 | 0.552079  | NA        | 0        | 0        | 0        | 0        | 0        | 1.004979 |
| 29223 | IL31      | 0.167497 | 2.421735 | 4.072558 | 0.594647 | 0.552079  | NA        | 0        | 0        | 0        | 0        | 0        | 1.004979 |
| 29233 | LOC119622 | 0.167497 | 2.421735 | 4.072558 | 0.594647 | 0.552079  | NA        | 0        | 0        | 0        | 0        | 0        | 1.004979 |
| 29238 | LOC119622 | 0.167497 | 2.421735 | 4.072558 | 0.594647 | 0.552079  | NA        | 0        | 0        | 0        | 0        | 0        | 1.004979 |
| 29332 | LOC103222 | 0.167497 | 2.421735 | 4.072558 | 0.594647 | 0.552079  | NA        | 0        | 0        | 0        | 0        | 0        | 1.004979 |
| 29339 | LOC119622 | 0.167497 | 2.421735 | 4.072558 | 0.594647 | 0.552079  | NA        | 0        | 0        | 0        | 0        | 0        | 1.004979 |
| 29437 | LOC103243 | 0.167497 | 2.421735 | 4.072558 | 0.594647 | 0.552079  | NA        | 0        | 0        | 0        | 0        | 0        | 1.004979 |
| 29449 | LOC119618 | 0.167497 | 2.421735 | 4.072558 | 0.594647 | 0.552079  | NA        | 0        | 0        | 0        | 0        | 0        | 1.004979 |
| 29494 | LOC103230 | 0.167497 | 2.421735 | 4.072558 | 0.594647 | 0.552079  | NA        | 0        | 0        | 0        | 0        | 0        | 1.004979 |
| 29504 | LOC119622 | 0.167497 | 2.421735 | 4.072558 | 0.594647 | 0.552079  | NA        | 0        | 0        | 0        | 0        | 0        | 1.004979 |
| 29541 | LOC119622 | 0.167497 | 2.421735 | 4.072558 | 0.594647 | 0.552079  | NA        | 0        | 0        | 0        | 0        | 0        | 1.004979 |
| 14707 | LOC103243 | 5.349331 | 2.421566 | 1.281631 | 1.889442 | 0.058833  | 0.106348  | 1.626259 | 0.547412 | 2.782925 | 11.16063 | 14.97377 | 1.004979 |
| 7079  | IL9R      | 21.71102 | 2.420986 | 0.653793 | 3.702988 | 0.000213  | 0.0008    | 8.673382 | 3.831883 | 7.653045 | 49.10679 | 44.92132 | 16.07967 |
| 4823  | LOC103225 | 28.78702 | 2.420941 | 0.504667 | 4.797102 | 1.61E-06  | 8.87E-06  | 11.38381 | 6.02153  | 9.740239 | 46.87467 | 53.47777 | 45.22408 |
| 15977 | LOC103243 | 5.795347 | 2.420911 | 1.450445 | 1.669082 | 0.095101  | 0.158244  | 0        | 0        | 5.565851 | 15.62489 | 8.556443 | 5.024897 |
| 4463  | C1QL2     | 30.52056 | 2.4203   | 0.480811 | 5.033788 | 4.81E-07  | 2.86E-06  | 8.131296 | 10.94824 | 9.740239 | 60.26743 | 42.78221 | 51.25395 |
| 20122 | LOC103222 | 1.249198 | 2.420244 | 2.397982 | 1.009283 | 0.312839  | 0.41332   | 0        | 0.547412 | 0.695731 | 2.232127 | 0        | 4.019918 |
| 612   | LOC103222 | 426.4295 | 2.419257 | 0.179468 | 13.48013 | 2.05E-41  | 8.89E-40  | 148.5317 | 103.4608 | 151.6694 | 752.2268 | 678.0981 | 724.5902 |
| 13648 | KLHL10    | 8.076177 | 2.419169 | 1.163123 | 2.079891 | 0.037536  | 0.073116  | 0        | 2.737059 | 4.87012  | 11.16063 | 25.66933 | 4.019918 |
| 12766 | CNGB3     | 6.545111 | 2.41876  | 1.076175 | 2.247553 | 0.024605  | 0.051239  | 2.168345 | 0.547412 | 3.478657 | 8.928508 | 17.11289 | 7.034856 |
| 10844 | LRR1Q4    | 8.882816 | 2.418108 | 0.908436 | 2.661837 | 0.007772  | 0.019053  | 1.626259 | 3.831883 | 2.782925 | 15.62489 | 21.39111 | 8.039836 |
| 373   | SHOX2     | 1569.463 | 2.41809  | 0.15007  | 16.11305 | 2.07E-58  | 1.47E-56  | 428.7903 | 622.9546 | 431.3534 | 2611.589 | 2725.227 | 2596.867 |
| 9466  | ADRA2A    | 13.58678 | 2.416974 | 0.807255 | 2.994066 | 0.002753  | 0.007731  | 2.710432 | 4.379295 | 5.565851 | 22.32127 | 38.50399 | 8.039836 |
| 17546 | LOC103238 | 2.775826 | 2.415196 | 1.714089 | 1.409026 | 0.158828  | 0.240649  | 0.542086 | 0        | 2.087194 | 4.464254 | 8.556443 | 1.004979 |
| 1371  | CDH18     | 130.9588 | 2.414532 | 0.250293 | 9.646822 | 5.07E-22  | 9.83E-21  | 48.24569 | 41.05589 | 34.09084 | 225.4448 | 228.8848 | 208.0308 |
| 5723  | CD34      | 23.43676 | 2.414282 | 0.559925 | 4.311798 | 1.62E-05  | 7.52E-05  | 4.878777 | 8.211177 | 9.044508 | 42.41041 | 44.92132 | 31.15436 |
| 15441 | PRMT8     | 4.879624 | 2.412506 | 1.375466 | 1.753956 | 0.079438  | 0.13677   | 0        | 0.547412 | 4.174388 | 6.696381 | 12.83466 | 5.024897 |
| 15433 | GPR101    | 4.699715 | 2.411801 | 1.374262 | 1.754979 | 0.079263  | 0.136539  | 0        | 1.642235 | 2.782925 | 8.928508 | 12.83466 | 2.009959 |
| 17583 | SOX21     | 3.45717  | 2.411589 | 1.71891  | 1.402976 | 0.160624  | 0.242859  | 0        | 0.547412 | 2.782925 | 13.39276 | 0        | 4.019918 |
| 7926  | SYNPO2L   | 16.06241 | 2.41135  | 0.702765 | 3.431234 | 0.000601  | 0.002015  | 5.420864 | 2.189647 | 7.653045 | 26.78552 | 34.22577 | 20.09959 |
| 5532  | LOC119618 | 27.10773 | 2.410907 | 0.547962 | 4.399774 | 1.08E-05  | 5.21E-05  | 4.336691 | 10.40082 | 11.1317  | 37.94616 | 55.61688 | 43.21412 |
| 10801 | LOC103238 | 10.67326 | 2.410807 | 0.902765 | 2.670471 | 0.007574  | 0.018643  | 2.168345 | 1.094824 | 6.957314 | 26.78552 | 14.97377 | 12.05975 |
| 16846 | FAM20A    | 4.310882 | 2.410423 | 1.59021  | 1.515789 | 0.129573  | 0.204481  | 0        | 0        | 4.174388 | 13.39276 | 4.278221 | 4.019918 |
| 6487  | DOK2      | 17.88564 | 2.410004 | 0.610829 | 3.945462 | 7.96E-05  | 0.000326  | 5.420864 | 6.02153  | 5.565851 | 33.4819  | 25.66933 | 31.15436 |
| 18755 | LOC119622 | 2.139938 | 2.409488 | 1.968648 | 1.22393  | 0.220978  | 0.313234  | 0        | 0        | 2.087194 | 4.464254 | 4.278221 | 2.009959 |
| 16831 | TBATA     | 4.705738 | 2.4088   | 1.585555 | 1.519215 | 0.128708  | 0.203298  | 0        | 1.642235 | 2.782925 | 6.696381 | 17.11289 | 0        |
| 13855 | LOC103224 | 5.541443 | 2.406767 | 1.180662 | 2.038489 | 0.041501  | 0.079632  | 1.084173 | 2.737059 | 1.391463 | 17.85702 | 2.139111 | 8.039836 |
| 17034 | LOC103237 | 3.477807 | 2.406551 | 1.617206 | 1.488092 | 0.136727  | 0.213389  | 0.542086 | 0        | 2.782925 | 13.39276 | 2.139111 | 2.009959 |
| 13936 | LOC103235 | 8.395347 | 2.40624  | 1.188079 | 2.02532  | 0.042835  | 0.081713  | 0        | 1.094824 | 6.957314 | 22.32127 | 14.97377 | 5.024897 |
| 17255 | LOC103218 | 3.261758 | 2.405476 | 1.6508   | 1.457158 | 0.145073  | 0.22351   | 0        | 1.642235 | 1.391463 | 13.39276 | 2.139111 | 1.004979 |
| 860   | HAS3      | 230.5913 | 2.405278 | 0.205011 | 11.73242 | 8.69E-32  | 2.69E-30  | 68.30288 | 67.33165 | 84.87923 | 426.3363 | 333.7013 | 402.9968 |
| 5440  | LOC119620 | 32.79987 | 2.404982 | 0.541316 | 4.442845 | 8.88E-06  | 4.34E-05  | 10.29964 | 4.379295 | 16.69755 | 58.0353  | 64.17332 | 43.21412 |
| 14973 | LOC103238 | 5.528187 | 2.404653 | 1.307649 | 1.838913 | 0.065928  | 0.117051  | 0.542086 | 0        | 4.87012  | 11.16063 | 8.556443 | 8.039836 |
| 146   | CA12      | 12717.39 | 2.404646 | 0.107647 | 22.33835 | 1.57E-110 | 2.85E-108 | 3974.035 | 4472.355 | 3675.549 | 21165.03 | 19711.9  | 23305.47 |
| 14074 | SULT2B1   | 6.170985 | 2.401842 | 1.201615 | 1.998845 | 0.045625  | 0.086183  | 0.542086 | 0.547412 | 4.87012  | 8.928508 | 17.11289 | 5.024897 |
| 4242  | UPK3B     | 40.09952 | 2.401366 | 0.46244  | 5.192815 | 2.07E-07  | 1.30E-06  | 15.17842 | 6.568942 | 16.69755 | 73.66019 | 64.17332 | 64.31869 |
| 19608 | GAL3ST3   | 2.176966 | 2.401    | 2.213451 | 1.084732 | 0.278041  | 0.376974  | 0        | 0        | 2.087194 | 6.696381 | 4.278221 | 0        |
| 7612  | BRINP3    | 23.57915 | 2.40093  | 0.681779 | 3.521564 | 0.000429  | 0.001498  | 3.252518 | 6.02153  | 13.2189  | 35.71403 | 64.17332 | 19.09461 |
| 14297 | LOC119625 | 5.466757 | 2.399594 | 1.223026 | 1.962014 | 0.049761  | 0.092529  | 1.084173 | 3.284471 | 0.695731 | 4.464254 | 19.252   | 4.019918 |
| 15943 | MYOC      | 3.753617 | 2.399088 | 1.430208 | 1.67744  | 0.093456  | 0.155831  | 0        | 1.642235 | 2.087194 | 4.464254 | 4.278221 | 10.04979 |
| 13811 | LOC119625 | 10.57593 | 2.398779 | 1.172526 | 2.045821 | 0.040774  | 0.078486  | 0        | 0.547412 | 9.740239 | 11.16063 | 29.94755 | 12.05975 |
| 14332 | LOC119625 | 6.889356 | 2.398464 | 1.226468 | 1.955586 | 0.050514  | 0.0937    | 0        | 1.094824 | 5.565851 | 20.08914 | 8.556443 | 6.029877 |
| 11633 | LOC103243 | 11.47098 | 2.397798 | 0.964227 | 2.486757 | 0.012891  | 0.029461  | 2.168345 | 0.547412 | 8.348776 | 15.62489 | 32.08666 | 10.04979 |
| 8008  | LOC119622 | 14.65183 | 2.397691 | 0.703139 | 3.40998  | 0.00065   | 0.002157  | 3.794605 | 3.284471 | 6.957314 | 31.24978 | 23.53022 | 19.09461 |
| 18461 | URAD      | 1.923002 | 2.397268 | 1.911063 | 1.254416 | 0.209691  | 0.301961  | 0        | 1.094824 | 0.695731 | 4.464254 | 4.278221 | 1.004979 |



|       |           |          |          |          |          |           |           |          |          |          |          |          |          |
|-------|-----------|----------|----------|----------|----------|-----------|-----------|----------|----------|----------|----------|----------|----------|
| 16392 | LOC119621 | 4.068962 | 2.394787 | 1.506901 | 1.589214 | 0.112012  | 0.18165   | 0        | 1.094824 | 2.782925 | 6.696381 | 12.83466 | 1.004979 |
| 9619  | PRTFDC1   | 18.51054 | 2.394222 | 0.810045 | 2.955664 | 0.00312   | 0.008623  | 0.542086 | 5.474118 | 11.82743 | 33.4819  | 40.6431  | 19.09461 |
| 14800 | LOC10323  | 5.302658 | 2.393446 | 1.277868 | 1.872999 | 0.061068  | 0.109691  | 0        | 1.642235 | 3.478657 | 6.696381 | 14.97377 | 5.024897 |
| 3228  | ESYT3     | 68.48711 | 2.392119 | 0.389994 | 6.133728 | 8.58E-10  | 7.07E-09  | 16.26259 | 20.80165 | 28.52499 | 98.21359 | 164.7115 | 82.40832 |
| 17379 | LOC11962  | 2.556949 | 2.391383 | 1.668982 | 1.432839 | 0.151904  | 0.23237   | 0        | 1.094824 | 1.391463 | 6.696381 | 2.139111 | 4.019918 |
| 9709  | PAPOLB    | 15.11374 | 2.38961  | 0.816463 | 2.926782 | 0.003425  | 0.009378  | 5.96295  | 2.737059 | 5.565851 | 22.32127 | 47.06043 | 7.034856 |
| 13938 | CYP4F11   | 6.040779 | 2.388698 | 1.179483 | 2.025207 | 0.042846  | 0.081724  | 0.542086 | 1.094824 | 4.174388 | 17.85702 | 8.556443 | 4.019918 |
| 18671 | TMEM1321  | 1.907499 | 2.388663 | 1.939266 | 1.231736 | 0.218048  | 0.310454  | 0        | 1.094824 | 0.695731 | 2.232127 | 6.417332 | 1.004979 |
| 18672 | HSD3B2    | 1.907499 | 2.388663 | 1.939266 | 1.231736 | 0.218048  | 0.310454  | 0        | 1.094824 | 0.695731 | 2.232127 | 6.417332 | 1.004979 |
| 13504 | LOC10322  | 5.786815 | 2.388114 | 1.133767 | 2.106354 | 0.035174  | 0.069244  | 0.542086 | 2.189647 | 2.782925 | 15.62489 | 8.556443 | 5.024897 |
| 12585 | LOC10323  | 7.057538 | 2.387834 | 1.044215 | 2.286726 | 0.022212  | 0.046921  | 0.542086 | 2.737059 | 3.478657 | 17.85702 | 10.69555 | 7.034856 |
| 19654 | LOC11961  | 1.270723 | 2.386867 | 2.215238 | 1.077476 | 0.281267  | 0.380437  | 0        | 0.547412 | 0.695731 | 2.232127 | 2.139111 | 2.009959 |
| 19655 | IL36A     | 1.270723 | 2.386867 | 2.215238 | 1.077476 | 0.281267  | 0.380437  | 0        | 0.547412 | 0.695731 | 2.232127 | 2.139111 | 2.009959 |
| 3213  | CNTFR     | 49.16225 | 2.386829 | 0.388151 | 6.149231 | 7.79E-10  | 6.44E-09  | 16.26259 | 16.42235 | 14.61036 | 64.73168 | 100.5382 | 82.40832 |
| 20833 | GPR65     | 1.323254 | 2.386721 | 2.652907 | 0.899662 | 0.3683    | 0.469988  | 0        | 0.547412 | 0.695731 | 6.696381 | 0        | 0        |
| 10608 | FCMR      | 11.43845 | 2.386568 | 0.877552 | 2.719573 | 0.006537  | 0.016382  | 0.542086 | 4.926706 | 5.565851 | 17.85702 | 25.66933 | 14.06971 |
| 7961  | LOC10324  | 24.55699 | 2.386335 | 0.697368 | 3.421915 | 0.000622  | 0.002077  | 3.252518 | 3.831883 | 16.69755 | 49.10679 | 51.33866 | 23.11453 |
| 3838  | ODCF3B    | 45.2875  | 2.384265 | 0.432943 | 5.507108 | 3.65E-08  | 2.53E-07  | 11.38381 | 10.40082 | 22.2634  | 82.5887  | 72.72976 | 72.35852 |
| 5628  | PAH       | 25.5177  | 2.38353  | 0.546676 | 4.360042 | 1.30E-05  | 6.14E-05  | 8.673382 | 10.40082 | 5.565851 | 29.01765 | 49.19955 | 50.24897 |
| 151   | DEPP1     | 1949.245 | 2.38274  | 0.107927 | 22.07726 | 5.23E-108 | 9.20E-106 | 601.7159 | 666.7476 | 614.3308 | 3337.03  | 3005.45  | 3470.194 |
| 648   | N4BP2L1   | 295.0727 | 2.381753 | 0.181035 | 13.15635 | 1.56E-39  | 6.42E-38  | 85.10756 | 110.5772 | 89.05362 | 482.1394 | 509.1083 | 494.4499 |
| 13357 | CFAP99    | 5.698675 | 2.381548 | 1.115182 | 2.13557  | 0.032714  | 0.065115  | 1.626259 | 0.547412 | 3.478657 | 8.928508 | 8.556443 | 11.05477 |
| 16907 | LOC11962  | 2.525056 | 2.381533 | 1.582549 | 1.504871 | 0.132357  | 0.208122  | 0.542086 | 0.547412 | 1.391463 | 2.232127 | 6.417332 | 4.019918 |
| 13574 | KCNQ5     | 5.806565 | 2.381383 | 1.137643 | 2.09326  | 0.036326  | 0.071145  | 1.626259 | 1.094824 | 2.782925 | 15.62489 | 10.69555 | 3.014938 |
| 17428 | LOC11961  | 2.524169 | 2.381055 | 1.672476 | 1.423671 | 0.154542  | 0.235735  | 1.084173 | 0        | 1.391463 | 2.232127 | 6.417332 | 4.019918 |
| 3203  | IGFN1     | 139.0852 | 2.380289 | 0.386414 | 6.15995  | 7.28E-10  | 6.04E-09  | 24.93597 | 46.53    | 62.61582 | 238.8376 | 337.9795 | 123.6125 |
| 8517  | MYL10     | 15.16008 | 2.379977 | 0.73171  | 3.252622 | 0.001143  | 0.003569  | 4.336691 | 3.831883 | 6.261582 | 31.24978 | 34.22577 | 11.05477 |
| 9698  | FGF22     | 11.48974 | 2.379237 | 0.812072 | 2.929837 | 0.003391  | 0.009297  | 3.252518 | 1.642235 | 6.261582 | 22.32127 | 21.39111 | 14.06971 |
| 2597  | LOC11962  | 86.37902 | 2.379101 | 0.340729 | 6.982394 | 2.90E-12  | 2.97E-11  | 21.14137 | 24.08612 | 38.26523 | 156.2489 | 168.9897 | 109.5428 |
| 14796 | CLEC3B    | 4.159373 | 2.377069 | 1.268415 | 1.874046 | 0.060924  | 0.109466  | 1.084173 | 1.642235 | 1.391463 | 2.232127 | 8.556443 | 10.04979 |
| 9549  | PLP1      | 12.50073 | 2.376699 | 0.799587 | 2.972408 | 0.002955  | 0.008225  | 2.710432 | 4.379295 | 4.87012  | 15.62489 | 36.36488 | 11.05477 |
| 404   | RASSF5    | 549.6231 | 2.37603  | 0.151951 | 15.63678 | 4.09E-55  | 2.69E-53  | 158.8313 | 182.8355 | 192.7176 | 930.797  | 823.5576 | 1008.999 |
| 7467  | BCAN      | 27.11399 | 2.374762 | 0.664461 | 3.573968 | 0.000352  | 0.001252  | 3.794605 | 7.116354 | 15.30609 | 44.64254 | 72.72976 | 19.09461 |
| 17227 | SCTR      | 34.01181 | 2.373804 | 1.622249 | 1.64328  | 0.143391  | 0.221283  | 0        | 0.547412 | 2.782925 | 2.232127 | 12.83466 | 2.009959 |
| 20220 | LOC11961  | 1.254333 | 2.373118 | 2.389983 | 0.992944 | 0.320737  | 0.421681  | 0.542086 | 0        | 0.695731 | 0        | 4.278221 | 2.009959 |
| 20221 | LOC10323  | 1.254333 | 2.373118 | 2.389983 | 0.992944 | 0.320737  | 0.421681  | 0.542086 | 0        | 0.695731 | 0        | 4.278221 | 2.009959 |
| 7595  | LOC11961  | 20.95576 | 2.372937 | 0.672719 | 3.527384 | 0.00042   | 0.001469  | 7.047123 | 2.737059 | 10.43597 | 44.64254 | 42.78221 | 18.08963 |
| 15585 | LOC11962  | 7.783291 | 2.372895 | 1.370311 | 1.731648 | 0.083336  | 0.142156  | 0        | 0        | 7.653045 | 22.32127 | 10.69555 | 6.029877 |
| 312   | FMO4      | 540.2308 | 2.372192 | 0.138134 | 17.1731  | 4.22E-66  | 3.60E-64  | 183.2252 | 178.4563 | 162.8011 | 924.1006 | 864.2007 | 928.601  |
| 1380  | TAMALIN   | 157.9817 | 2.371937 | 0.246655 | 9.616429 | 6.82E-22  | 1.31E-20  | 62.33993 | 44.88777 | 46.614   | 270.0874 | 222.4675 | 301.4938 |
| 16158 | LOC11961  | 3.781164 | 2.371158 | 1.450139 | 1.635124 | 0.102023  | 0.16785   | 0        | 1.642235 | 2.087194 | 2.232127 | 10.69555 | 6.029877 |
| 7676  | LOC10322  | 25.49634 | 2.370763 | 0.677508 | 3.49924  | 0.000467  | 0.001616  | 4.878777 | 3.284471 | 16.69755 | 55.80317 | 49.19955 | 23.11453 |
| 13517 | CCER1     | 12.50532 | 2.370754 | 1.126384 | 2.104747 | 0.035313  | 0.069454  | 0        | 0.547412 | 11.82743 | 15.62489 | 29.94755 | 17.08465 |
| 17725 | ANKRD60   | 2.323623 | 2.370675 | 1.717946 | 1.379948 | 0.167603  | 0.25138   | 0.542086 | 1.642235 | 0        | 4.464254 | 4.278221 | 3.014938 |
| 7346  | LOC10322  | 35.43378 | 2.370191 | 0.655273 | 3.617107 | 0.000298  | 0.001078  | 6.505036 | 4.379295 | 23.65487 | 55.80317 | 94.12087 | 28.13943 |
| 18556 | LOC10323  | 2.309007 | 2.369887 | 1.907531 | 1.242385 | 0.214095  | 0.306731  | 0        | 2.189647 | 0        | 2.232127 | 6.417332 | 3.014938 |
| 14817 | LOC10324  | 4.518398 | 2.368903 | 1.267443 | 1.869041 | 0.061617  | 0.110547  | 1.084173 | 0.547412 | 2.782925 | 13.39276 | 4.278221 | 5.024897 |
| 12002 | FOXE3     | 21.60496 | 2.368683 | 0.984776 | 2.405303 | 0.016159  | 0.035792  | 0.542086 | 0.547412 | 20.17621 | 46.87467 | 36.36488 | 25.12449 |
| 20226 | LOC11962  | 1.255221 | 2.368595 | 2.389492 | 0.991255 | 0.321561  | 0.422638  | 0        | 0.547412 | 0.695731 | 0        | 4.278221 | 2.009959 |
| 20227 | LOC11961  | 1.255221 | 2.368595 | 2.389492 | 0.991255 | 0.321561  | 0.422638  | 0        | 0.547412 | 0.695731 | 0        | 4.278221 | 2.009959 |
| 12710 | CEBPE     | 9.139547 | 2.367779 | 1.049309 | 2.256513 | 0.024039  | 0.050286  | 0        | 2.737059 | 6.261582 | 13.39276 | 21.39111 | 11.05477 |
| 10128 | LOC11962  | 14.56724 | 2.367391 | 0.836159 | 2.831269 | 0.004636  | 0.012169  | 2.168345 | 4.379295 | 7.653045 | 8.928508 | 49.19955 | 15.07469 |
| 1613  | FLVCR2    | 119.7081 | 2.364732 | 0.264339 | 8.945829 | 3.69E-19  | 6.08E-18  | 35.7777  | 35.58177 | 45.22254 | 232.1412 | 194.6591 | 174.8664 |
| 17484 | AZU1      | 2.562972 | 2.362654 | 1.670486 | 1.414351 | 0.157259  | 0.239117  | 0        | 1.094824 | 1.391463 | 4.464254 | 6.417332 | 2.009959 |
| 5359  | CLIC5     | 40.48181 | 2.362642 | 0.526808 | 4.484823 | 7.30E-06  | 3.62E-05  | 10.84173 | 7.663765 | 20.87194 | 87.05295 | 81.28623 | 35.17428 |
| 7214  | PRLHR     | 24.43234 | 2.361576 | 0.644821 | 3.662377 | 0.00025   | 0.000921  | 3.252518 | 4.926706 | 16.00182 | 40.17829 | 47.06043 | 35.17428 |
| 5720  | LOC11962  | 41.55104 | 2.360933 | 0.54737  | 4.313233 | 1.61E-05  | 7.48E-05  | 8.131296 | 8.211177 | 24.3506  | 64.73168 | 102.6773 | 41.20416 |
| 27126 | LOC11962  | 0.618445 | 2.360592 | 3.758545 | 0.62806  | 0.529965  | NA        | 0        | 0        | 0.695731 | 0        | 0        | 3.014938 |
| 27251 | LOC10321  | 0.618445 | 2.360592 | 3.758545 | 0.62806  | 0.529965  | NA        | 0        | 0        | 0.695731 | 0        | 0        | 3.014938 |
| 29457 | LOC11962  | 0.618445 | 2.360592 | 3.758545 | 0.62806  | 0.529965  | NA        | 0        | 0        | 0.695731 | 0        | 0        | 3.014938 |
| 392   | MYBPH     | 627.371  | 2.360282 | 0.149201 | 15.81952 | 2.28E-56  | 1.55E-54  | 217.9187 | 201.995  | 194.8048 | 1066.957 | 902.7047 | 1179.846 |
| 13290 | B3GNT8    | 7.305217 | 2.359587 | 1.097346 | 2.150267 | 0.031534  | 0.06308   | 0.542086 | 1.094824 | 5.565851 | 15.62489 | 14.97377 | 6.029877 |
| 9733  | LOC11962  | 10.20535 | 2.357959 | 0.807346 | 2.920629 | 0.003493  | 0.009542  | 3.252518 | 3.831883 | 2.782925 | 22.32127 | 14.97377 | 14.06971 |
| 14994 | LOC11962  | 5.348015 | 2.357359 | 1.284404 | 1.835372 | 0.066451  | 0.11782   | 0.542086 | 0.547412 | 4.174388 | 6.696381 | 17.11289 | 3.014938 |
| 19157 | LOC10322  | 1.941699 | 2.3572   | 2.033735 | 1.15905  | 0.246436  | 0.341984  | 0        | 0.547412 | 1.391463 | 6.696381 | 0        | 3.014938 |
| 1142  | TMEM154   | 170.3573 | 2.357051 | 0.227799 | 10.34706 | 4.32E-25  | 1.00E-23  | 51.49821 | 65.68942 | 50.09266 | 265.6231 | 271.6671 | 317.5735 |
| 8105  | GCM1      | 14.03957 | 2.356793 | 0.697443 | 3.37919  | 0.000727  | 0.002385  | 4.878777 | 3.284471 | 5.565851 | 29.01765 | 21.39111 | 20.09959 |
| 14698 | AANAT     | 4.47189  | 2.356179 | 1.246169 | 1.890739 | 0.058659  | 0.1061    | 1.084173 | 0.547412 | 2.782925 | 6.696381 | 10.69555 | 5.024897 |
| 17733 | MRGPRX2   | 2.547469 | 2.355824 | 1.708994 | 1.378485 | 0.168053  | 0.251914  | 0        | 1.094824 | 1.391463 | 2.232127 | 8.556443 | 2.009959 |
| 17734 | LOC11962  | 2.547469 | 2.355824 | 1.708994 | 1.378485 | 0.168053  | 0.251914  | 0        | 1.094824 | 1.391463 | 2.232127 | 8.556443 | 2.009959 |
| 11940 | LOC11962  | 7.519019 | 2.355515 | 0.974725 | 2.416594 | 0.015666  | 0.034882  | 1.626259 | 2.189647 | 3.478657 | 20.08914 | 10.69555 | 7.034856 |
| 2427  | RDH12     | 80.45601 | 2.       |          |          |           |           |          |          |          |          |          |          |



|       |           |          |          |          |          |           |           |          |          |          |          |          |          |
|-------|-----------|----------|----------|----------|----------|-----------|-----------|----------|----------|----------|----------|----------|----------|
| 18513 | LOC119621 | 2.584497 | 2.353559 | 1.883804 | 1.249365 | 0.211532  | 0.303763  | 0        | 1.094824 | 1.391463 | 4.464254 | 8.556443 | 0        |
| 18460 | LYPD2     | 1.926196 | 2.352838 | 1.875569 | 1.254467 | 0.209672  | 0.301958  | 0        | 0.547412 | 1.391463 | 4.464254 | 2.139111 | 3.014938 |
| 9092  | VXN       | 12.72428 | 2.352741 | 0.762548 | 3.085369 | 0.002033  | 0.005944  | 5.420864 | 2.737059 | 4.174388 | 17.85702 | 32.08666 | 14.06971 |
| 12211 | PSCA      | 7.182406 | 2.351542 | 0.994371 | 2.364853 | 0.018037  | 0.039267  | 1.084173 | 3.831883 | 2.087194 | 8.928508 | 17.11289 | 10.04979 |
| 352   | H1-1      | 897.1541 | 2.350844 | 0.143533 | 16.37841 | 2.73E-60  | 2.06E-58  | 258.0331 | 348.1539 | 274.8139 | 1571.417 | 1514.49  | 1416.016 |
| 18456 | LOC103241 | 2.531966 | 2.350071 | 1.871539 | 1.255689 | 0.209229  | 0.301384  | 0        | 1.094824 | 1.391463 | 0        | 10.69555 | 2.009959 |
| 19388 | LOC119621 | 1.977839 | 2.350036 | 2.099051 | 1.119571 | 0.262897  | 0.360486  | 0.542086 | 0        | 1.391463 | 8.928508 | 0        | 1.004979 |
| 14571 | TUBB1     | 4.269569 | 2.348519 | 1.228534 | 1.911643 | 0.055922  | 0.10203   | 1.626259 | 1.094824 | 1.391463 | 8.928508 | 8.556443 | 4.019918 |
| 83    | RNF128    | 16972.58 | 2.34829  | 0.091111 | 25.77401 | 1.73E-146 | 5.56E-144 | 5311.362 | 6103.642 | 5300.082 | 28019.89 | 28439.48 | 28661.01 |
| 20374 | LOC119621 | 1.291361 | 2.348243 | 2.431971 | 0.965572 | 0.334258  | 0.436157  | 0.542086 | 0        | 0.695731 | 2.232127 | 4.278221 | 0        |
| 15989 | KCNK18    | 6.230792 | 2.347854 | 1.407597 | 1.667988 | 0.095318  | 0.158486  | 0        | 0        | 6.261582 | 13.39276 | 10.69555 | 7.034856 |
| 190   | SLC12A1   | 2634.274 | 2.347484 | 0.114465 | 20.50836 | 1.81E-93  | 2.54E-91  | 813.6716 | 993.5524 | 787.5679 | 4303.541 | 4447.211 | 4460.099 |
| 12012 | MXRA5     | 8.935188 | 2.345499 | 0.975579 | 2.404212 | 0.016207  | 0.03587   | 1.626259 | 1.642235 | 5.565851 | 8.928508 | 27.80844 | 8.039836 |
| 20385 | CST6      | 1.292249 | 2.343674 | 2.431482 | 0.963887 | 0.335103  | 0.437001  | 0        | 0.547412 | 0.695731 | 2.232127 | 4.278221 | 0        |
| 20386 | LOC103211 | 1.292249 | 2.343674 | 2.431482 | 0.963887 | 0.335103  | 0.437001  | 0        | 0.547412 | 0.695731 | 2.232127 | 4.278221 | 0        |
| 11951 | LOC119621 | 6.944476 | 2.343348 | 0.970747 | 2.413963 | 0.01578   | 0.035103  | 2.710432 | 2.737059 | 1.391463 | 8.928508 | 12.83466 | 13.06473 |
| 3551  | LOC103241 | 50.46766 | 2.342944 | 0.403711 | 5.803518 | 6.49E-09  | 4.86E-08  | 21.68345 | 16.42235 | 11.1317  | 84.82083 | 98.39909 | 70.34856 |
| 16775 | LOC119611 | 3.202942 | 2.341171 | 1.530627 | 1.529551 | 0.126128  | 0.199887  | 0        | 1.094824 | 2.087194 | 4.464254 | 8.556443 | 3.014938 |
| 11033 | TRPV5     | 9.365762 | 2.34107  | 0.892622 | 2.622688 | 0.008724  | 0.021022  | 1.084173 | 2.737059 | 5.565851 | 15.62489 | 17.11289 | 14.06971 |
| 3806  | OTOF      | 41.92834 | 2.340312 | 0.423071 | 5.531723 | 3.17E-08  | 2.21E-07  | 14.09425 | 13.6853  | 13.2189  | 75.89232 | 83.42532 | 51.25395 |
| 94    | DUSP4     | 4720.336 | 2.339879 | 0.095054 | 24.61621 | 8.47E-134 | 2.40E-131 | 1605.66  | 1527.826 | 1540.349 | 7698.606 | 7416.297 | 8533.281 |
| 21049 | LACTBL1   | 1.276746 | 2.337039 | 2.678359 | 0.872563 | 0.382901  | 0.483532  | 0        | 0.547412 | 0.695731 | 0        | 6.417332 | 0        |
| 21052 | LOC103241 | 1.276746 | 2.337039 | 2.678359 | 0.872563 | 0.382901  | 0.483532  | 0        | 0.547412 | 0.695731 | 0        | 6.417332 | 0        |
| 9620  | SOX7      | 11.32602 | 2.336923 | 0.790671 | 2.955619 | 0.00312   | 0.008623  | 3.794605 | 4.379295 | 2.782925 | 24.5534  | 21.39111 | 11.05477 |
| 13515 | LOC119621 | 14.40931 | 2.336644 | 1.109892 | 2.10529  | 0.035266  | 0.069371  | 0        | 0.547412 | 13.91463 | 31.24978 | 25.66933 | 15.07469 |
| 17855 | IL36RN    | 33.00254 | 2.336296 | 1.707168 | 1.368521 | 0.171149  | 0.25483   | 0        | 2.189647 | 30.61218 | 64.73168 | 66.31243 | 34.1693  |
| 15625 | CALHM1    | 5.293544 | 2.336024 | 1.352446 | 1.727258 | 0.084121  | 0.143097  | 0        | 0.547412 | 4.87012  | 4.464254 | 12.83466 | 9.044815 |
| 6204  | PROX1     | 35.58184 | 2.335672 | 0.573794 | 4.070576 | 4.69E-05  | 0.000201  | 5.96295  | 10.40082 | 18.78475 | 62.49956 | 87.70354 | 28.13943 |
| 13859 | LOC103221 | 5.633046 | 2.335544 | 1.146192 | 2.037655 | 0.041584  | 0.079769  | 1.626259 | 1.094824 | 2.782925 | 17.85702 | 6.417332 | 4.019918 |
| 11684 | ASAH2     | 8.095038 | 2.33526  | 0.943429 | 2.47529  | 0.013313  | 0.030291  | 1.084173 | 2.189647 | 4.87012  | 13.39276 | 14.97377 | 12.05975 |
| 15485 | DNAJC5B   | 3.601788 | 2.334112 | 1.335869 | 1.747262 | 0.080592  | 0.138362  | 1.626259 | 0.547412 | 1.391463 | 4.464254 | 8.556443 | 5.024897 |
| 10694 | CUNH19or  | 12.91736 | 2.333857 | 0.866484 | 2.69348  | 0.007071  | 0.017578  | 1.626259 | 2.189647 | 9.044508 | 26.78552 | 27.80844 | 10.04979 |
| 6013  | BLNK      | 34.37833 | 2.333679 | 0.561143 | 4.158797 | 3.20E-05  | 0.000141  | 13.01007 | 17.51718 | 3.478657 | 60.26743 | 40.6431  | 71.35354 |
| 16235 | ASB10     | 4.701288 | 2.333647 | 1.440853 | 1.619629 | 0.105312  | 0.17245   | 0        | 3.831883 | 0.695731 | 6.696381 | 14.97377 | 2.009959 |
| 12436 | TPH2      | 7.663106 | 2.332742 | 1.008417 | 2.313271 | 0.020708  | 0.044268  | 1.626259 | 4.379295 | 1.391463 | 11.16063 | 21.39111 | 6.029877 |
| 11866 | LOC103241 | 10.48593 | 2.332581 | 0.95864  | 2.43322  | 0.014965  | 0.033526  | 6.505036 | 2.189647 | 1.391463 | 17.85702 | 29.94755 | 5.024897 |
| 15348 | MAGEA1    | 4.933727 | 2.332565 | 1.31721  | 1.770838 | 0.076588  | 0.132661  | 0        | 2.737059 | 2.087194 | 8.928508 | 12.83466 | 3.014938 |
| 18001 | IL10RA    | 2.327705 | 2.332227 | 1.737385 | 1.342378 | 0.179473  | 0.265057  | 0        | 1.642235 | 0.695731 | 4.464254 | 2.139111 | 5.024897 |
| 14041 | CBL       | 7.008827 | 2.332135 | 1.162311 | 2.006464 | 0.044807  | 0.084836  | 0        | 2.189647 | 4.87012  | 6.696381 | 19.252   | 9.044815 |
| 16393 | LOC119621 | 6.950841 | 2.332094 | 1.467489 | 1.589173 | 0.112021  | 0.18165   | 0        | 0        | 6.957314 | 15.62489 | 17.11289 | 2.009959 |
| 10116 | LOC119621 | 10.2585  | 2.331541 | 0.822645 | 2.834201 | 0.004594  | 0.012073  | 2.710432 | 3.831883 | 3.478657 | 20.08914 | 21.39111 | 10.04979 |
| 13506 | LBX1      | 17.89287 | 2.331298 | 1.10687  | 2.106207 | 0.035186  | 0.06926   | 0.542086 | 0        | 17.39328 | 35.71403 | 40.6431  | 13.06473 |
| 12590 | NIPAL4    | 7.566152 | 2.330719 | 1.019681 | 2.285734 | 0.02227   | 0.047025  | 1.084173 | 2.189647 | 4.174388 | 20.08914 | 12.83466 | 5.024897 |
| 12747 | LOC103211 | 6.588681 | 2.330663 | 1.036072 | 2.249519 | 0.024479  | 0.051054  | 1.084173 | 3.284471 | 2.087194 | 8.928508 | 17.11289 | 7.034856 |
| 12930 | LOC103231 | 12.71393 | 2.330473 | 1.051568 | 2.216189 | 0.026679  | 0.054857  | 0        | 1.642235 | 11.1317  | 26.78552 | 25.66933 | 11.05477 |
| 17372 | LOC119621 | 3.171049 | 2.330026 | 1.622839 | 1.435772 | 0.151067  | 0.231183  | 0.542086 | 0.547412 | 2.087194 | 0        | 12.83466 | 3.014938 |
| 13991 | FGF10     | 6.18612  | 2.329834 | 1.158083 | 2.011802 | 0.044241  | 0.084064  | 0        | 2.737059 | 3.478657 | 11.16063 | 10.69555 | 9.044815 |
| 10584 | HTR1A     | 24.75422 | 2.329183 | 0.85434  | 2.726295 | 0.006405  | 0.016088  | 1.626259 | 1.642235 | 21.56767 | 49.10679 | 53.47777 | 21.10457 |
| 17133 | KRT36     | 2.997739 | 2.32916  | 1.57824  | 1.475796 | 0.139999  | 0.217234  | 0.542086 | 1.094824 | 1.391463 | 8.928508 | 0        | 6.029877 |
| 889   | LOC119621 | 220.6305 | 2.329084 | 0.201874 | 11.53732 | 8.55E-31  | 2.56E-29  | 79.14461 | 63.49977 | 76.53045 | 377.2295 | 395.7355 | 331.6432 |
| 12884 | TAS1R1    | 5.964746 | 2.328725 | 1.048149 | 2.22175  | 0.0263    | 0.054268  | 2.710432 | 1.094824 | 2.087194 | 11.16063 | 10.69555 | 8.039836 |
| 6730  | LOC119611 | 18.98663 | 2.328686 | 0.605688 | 3.844697 | 0.000121  | 0.000477  | 7.047123 | 7.116354 | 4.87012  | 29.01765 | 25.66933 | 40.19918 |
| 7787  | ANP32D    | 20.17661 | 2.328571 | 0.671197 | 3.469279 | 0.000522  | 0.001782  | 3.252518 | 10.94824 | 5.565851 | 49.10679 | 32.08666 | 20.09959 |
| 9546  | LY75      | 13.08466 | 2.328483 | 0.783073 | 2.973521 | 0.002944  | 0.008199  | 2.710432 | 3.284471 | 6.957314 | 24.5534  | 29.94755 | 11.05477 |
| 314   | TCN2      | 5836.813 | 2.327868 | 0.136121 | 17.10149 | 1.45E-65  | 1.22E-63  | 2159.13  | 1621.981 | 2038.493 | 9229.845 | 8663.398 | 11308.03 |
| 18965 | MMRN1     | 1.708372 | 2.327209 | 1.954199 | 1.190876 | 0.233702  | 0.327585  | 0.542086 | 1.094824 | 0        | 4.464254 | 2.139111 | 2.009959 |
| 18966 | LOC103211 | 1.708372 | 2.327209 | 1.954199 | 1.190876 | 0.233702  | 0.327585  | 0.542086 | 1.094824 | 0        | 4.464254 | 2.139111 | 2.009959 |
| 13684 | LOC103231 | 5.296433 | 2.327188 | 1.123108 | 2.072096 | 0.038256  | 0.074321  | 1.084173 | 2.737059 | 1.391463 | 6.696381 | 12.83466 | 7.034856 |
| 11406 | RGS22     | 9.176373 | 2.325465 | 0.917521 | 2.534507 | 0.011261  | 0.026246  | 1.084173 | 3.831883 | 4.174388 | 13.39276 | 23.53022 | 9.044815 |
| 16479 | MRGPRG    | 2.984231 | 2.324949 | 1.475443 | 1.575763 | 0.11508   | 0.185488  | 1.084173 | 1.094824 | 0.695731 | 4.464254 | 8.556443 | 2.009959 |
| 16488 | DNMT3L    | 2.984231 | 2.324949 | 1.475443 | 1.575763 | 0.11508   | 0.185488  | 1.084173 | 1.094824 | 0.695731 | 4.464254 | 8.556443 | 2.009959 |
| 13725 | BPIFB1    | 5.531179 | 2.324501 | 1.125444 | 2.065409 | 0.038884  | 0.075318  | 1.626259 | 0.547412 | 3.478657 | 8.928508 | 8.556443 | 10.04979 |
| 26793 | LOC119611 | 0.614363 | 2.324193 | 3.383486 | 0.686922 | 0.492132  | NA        | 0.542086 | 0        | 0        | 0        | 2.139111 | 1.004979 |
| 27536 | ACRV1     | 0.614363 | 2.324193 | 3.383486 | 0.686922 | 0.492132  | NA        | 0.542086 | 0        | 0        | 0        | 2.139111 | 1.004979 |
| 28171 | LOC119611 | 0.614363 | 2.324193 | 3.383486 | 0.686922 | 0.492132  | NA        | 0.542086 | 0        | 0        | 0        | 2.139111 | 1.004979 |
| 28346 | LOC119611 | 0.614363 | 2.324193 | 3.383486 | 0.686922 | 0.492132  | NA        | 0.542086 | 0        | 0        | 0        | 2.139111 | 1.004979 |
| 28728 | LOC103231 | 0.614363 | 2.324193 | 3.383486 | 0.686922 | 0.492132  | NA        | 0.542086 | 0        | 0        | 0        | 2.139111 | 1.004979 |
| 28857 | LOC103211 | 0.614363 | 2.324193 | 3.383486 | 0.686922 | 0.492132  | NA        | 0.542086 | 0        | 0        | 0        | 2.139111 | 1.004979 |
| 29381 | LOC103231 | 0.614363 | 2.324193 | 3.383486 | 0.686922 | 0.492132  | NA        | 0.542086 | 0        | 0        | 0        | 2.139111 | 1.004979 |
| 26782 | LOC103231 | 0.61525  | 2.324189 | 3.381844 | 0.687255 | 0.491922  | NA        | 0        | 0.547412 | 0        | 0        | 2.139111 | 1.004979 |
| 26861 | LOC119611 | 0.61525  | 2.324189 | 3.381844 | 0.687255 | 0.491922  | NA        | 0        | 0.547412 | 0        | 0        | 2.139111 | 1.004979 |
| 27033 | LOC103231 | 0.61525  | 2.324189 | 3.381844 | 0.687255 | 0.491922  | NA        | 0        | 0.547412 | 0        | 0        | 2.139111 | 1.004979 |
| 27373 | LOC119621 | 0.       |          |          |          |           |           |          |          |          |          |          |          |



|       |           |          |          |          |          |           |           |          |          |          |          |          |          |
|-------|-----------|----------|----------|----------|----------|-----------|-----------|----------|----------|----------|----------|----------|----------|
| 27878 | COX7B2    | 0.61525  | 2.324189 | 3.381844 | 0.687255 | 0.491922  | NA        | 0        | 0.547412 | 0        | 0        | 2.139111 | 1.004979 |
| 27889 | LOC119627 | 0.61525  | 2.324189 | 3.381844 | 0.687255 | 0.491922  | NA        | 0        | 0.547412 | 0        | 0        | 2.139111 | 1.004979 |
| 28506 | LOC119620 | 0.61525  | 2.324189 | 3.381844 | 0.687255 | 0.491922  | NA        | 0        | 0.547412 | 0        | 0        | 2.139111 | 1.004979 |
| 28668 | LOC119620 | 0.61525  | 2.324189 | 3.381844 | 0.687255 | 0.491922  | NA        | 0        | 0.547412 | 0        | 0        | 2.139111 | 1.004979 |
| 29078 | LOC119627 | 0.61525  | 2.324189 | 3.381844 | 0.687255 | 0.491922  | NA        | 0        | 0.547412 | 0        | 0        | 2.139111 | 1.004979 |
| 26663 | EFCAB9    | 0.630753 | 2.324126 | 3.354501 | 0.692838 | 0.488411  | NA        | 0        | 0.547412 | 0        | 2.232127 | 0        | 1.004979 |
| 26760 | LOC119624 | 0.630753 | 2.324126 | 3.354501 | 0.692838 | 0.488411  | NA        | 0        | 0.547412 | 0        | 2.232127 | 0        | 1.004979 |
| 27026 | MRGPRD    | 0.630753 | 2.324126 | 3.354501 | 0.692838 | 0.488411  | NA        | 0        | 0.547412 | 0        | 2.232127 | 0        | 1.004979 |
| 27050 | LOC103235 | 0.630753 | 2.324126 | 3.354501 | 0.692838 | 0.488411  | NA        | 0        | 0.547412 | 0        | 2.232127 | 0        | 1.004979 |
| 27440 | TAFA1     | 0.630753 | 2.324126 | 3.354501 | 0.692838 | 0.488411  | NA        | 0        | 0.547412 | 0        | 2.232127 | 0        | 1.004979 |
| 27512 | LOC119626 | 0.630753 | 2.324126 | 3.354501 | 0.692838 | 0.488411  | NA        | 0        | 0.547412 | 0        | 2.232127 | 0        | 1.004979 |
| 27558 | UBTFL1    | 0.630753 | 2.324126 | 3.354501 | 0.692838 | 0.488411  | NA        | 0        | 0.547412 | 0        | 2.232127 | 0        | 1.004979 |
| 28485 | CBY2      | 0.630753 | 2.324126 | 3.354501 | 0.692838 | 0.488411  | NA        | 0        | 0.547412 | 0        | 2.232127 | 0        | 1.004979 |
| 27048 | LOC103235 | 0.63997  | 2.324086 | 3.337507 | 0.696354 | 0.486207  | NA        | 0        | 0        | 0.695731 | 0        | 2.139111 | 1.004979 |
| 27146 | LOC119624 | 0.63997  | 2.324086 | 3.337507 | 0.696354 | 0.486207  | NA        | 0        | 0        | 0.695731 | 0        | 2.139111 | 1.004979 |
| 27157 | LOC103237 | 0.63997  | 2.324086 | 3.337507 | 0.696354 | 0.486207  | NA        | 0        | 0        | 0.695731 | 0        | 2.139111 | 1.004979 |
| 27236 | FAM240C   | 0.63997  | 2.324086 | 3.337507 | 0.696354 | 0.486207  | NA        | 0        | 0        | 0.695731 | 0        | 2.139111 | 1.004979 |
| 28137 | LOC119618 | 0.63997  | 2.324086 | 3.337507 | 0.696354 | 0.486207  | NA        | 0        | 0        | 0.695731 | 0        | 2.139111 | 1.004979 |
| 28279 | LOC119618 | 0.63997  | 2.324086 | 3.337507 | 0.696354 | 0.486207  | NA        | 0        | 0        | 0.695731 | 0        | 2.139111 | 1.004979 |
| 28281 | LOC103225 | 0.63997  | 2.324086 | 3.337507 | 0.696354 | 0.486207  | NA        | 0        | 0        | 0.695731 | 0        | 2.139111 | 1.004979 |
| 28611 | LOC103244 | 0.63997  | 2.324086 | 3.337507 | 0.696354 | 0.486207  | NA        | 0        | 0        | 0.695731 | 0        | 2.139111 | 1.004979 |
| 28926 | LOC103225 | 0.63997  | 2.324086 | 3.337507 | 0.696354 | 0.486207  | NA        | 0        | 0        | 0.695731 | 0        | 2.139111 | 1.004979 |
| 28934 | LOC103234 | 0.63997  | 2.324086 | 3.337507 | 0.696354 | 0.486207  | NA        | 0        | 0        | 0.695731 | 0        | 2.139111 | 1.004979 |
| 28940 | LOC103234 | 0.63997  | 2.324086 | 3.337507 | 0.696354 | 0.486207  | NA        | 0        | 0        | 0.695731 | 0        | 2.139111 | 1.004979 |
| 29038 | SMCO4     | 0.63997  | 2.324086 | 3.337507 | 0.696354 | 0.486207  | NA        | 0        | 0        | 0.695731 | 0        | 2.139111 | 1.004979 |
| 29245 | LOC103235 | 0.63997  | 2.324086 | 3.337507 | 0.696354 | 0.486207  | NA        | 0        | 0        | 0.695731 | 0        | 2.139111 | 1.004979 |
| 26899 | LOC103238 | 0.655473 | 2.324025 | 3.311781 | 0.701745 | 0.482838  | NA        | 0        | 0        | 0.695731 | 2.232127 | 0        | 1.004979 |
| 27345 | LOC119626 | 0.655473 | 2.324025 | 3.311781 | 0.701745 | 0.482838  | NA        | 0        | 0        | 0.695731 | 2.232127 | 0        | 1.004979 |
| 27618 | LOC119626 | 0.655473 | 2.324025 | 3.311781 | 0.701745 | 0.482838  | NA        | 0        | 0        | 0.695731 | 2.232127 | 0        | 1.004979 |
| 27648 | TRNAQ-CU  | 0.655473 | 2.324025 | 3.311781 | 0.701745 | 0.482838  | NA        | 0        | 0        | 0.695731 | 2.232127 | 0        | 1.004979 |
| 28297 | LOC119615 | 0.655473 | 2.324025 | 3.311781 | 0.701745 | 0.482838  | NA        | 0        | 0        | 0.695731 | 2.232127 | 0        | 1.004979 |
| 28530 | LOC119620 | 0.655473 | 2.324025 | 3.311781 | 0.701745 | 0.482838  | NA        | 0        | 0        | 0.695731 | 2.232127 | 0        | 1.004979 |
| 28553 | LOC119620 | 0.655473 | 2.324025 | 3.311781 | 0.701745 | 0.482838  | NA        | 0        | 0        | 0.695731 | 2.232127 | 0        | 1.004979 |
| 28618 | LOC119620 | 0.655473 | 2.324025 | 3.311781 | 0.701745 | 0.482838  | NA        | 0        | 0        | 0.695731 | 2.232127 | 0        | 1.004979 |
| 28754 | LOC119627 | 0.655473 | 2.324025 | 3.311781 | 0.701745 | 0.482838  | NA        | 0        | 0        | 0.695731 | 2.232127 | 0        | 1.004979 |
| 28905 | LOC119627 | 0.655473 | 2.324025 | 3.311781 | 0.701745 | 0.482838  | NA        | 0        | 0        | 0.695731 | 2.232127 | 0        | 1.004979 |
| 29260 | LOC119625 | 0.655473 | 2.324025 | 3.311781 | 0.701745 | 0.482838  | NA        | 0        | 0        | 0.695731 | 2.232127 | 0        | 1.004979 |
| 17281 | KRT12     | 4.11238  | 2.323826 | 1.599225 | 1.453095 | 0.146197  | 0.224909  | 0        | 0        | 4.174388 | 8.928508 | 8.556443 | 3.014938 |
| 2704  | LOC119625 | 70.03207 | 2.323509 | 0.340277 | 6.828294 | 8.59E-12  | 8.45E-11  | 18.97302 | 23.53871 | 27.13352 | 136.1597 | 121.9293 | 92.45811 |
| 12027 | LOC103227 | 7.9856   | 2.322277 | 0.966986 | 2.401561 | 0.016325  | 0.036086  | 4.878777 | 1.094824 | 2.087194 | 8.928508 | 12.83466 | 18.08963 |
| 12800 | LCP2      | 6.835796 | 2.322254 | 1.036932 | 2.239544 | 0.025121  | 0.052174  | 2.710432 | 3.284471 | 0.695731 | 17.85702 | 6.417332 | 10.04979 |
| 18801 | LOC103237 | 1.947722 | 2.322034 | 1.907363 | 1.217405 | 0.22345   | 0.315963  | 0        | 0.547412 | 1.391463 | 4.464254 | 4.278221 | 1.004979 |
| 11680 | LOC119627 | 10.30339 | 2.321774 | 0.937793 | 2.475786 | 0.013294  | 0.030259  | 2.710432 | 6.568942 | 0.695731 | 24.5534  | 19.252   | 8.039836 |
| 286   | AMPD3     | 622.0587 | 2.320718 | 0.130619 | 17.7671  | 1.27E-70  | 1.18E-68  | 202.1982 | 218.4173 | 202.4578 | 1006.689 | 1018.217 | 1084.373 |
| 11945 | SLC22A16  | 9.706053 | 2.319908 | 0.960598 | 2.415067 | 0.015732  | 0.035014  | 3.794605 | 2.189647 | 3.478657 | 20.08914 | 25.66933 | 3.014938 |
| 16143 | LOC119625 | 4.128108 | 2.319466 | 1.415022 | 1.639174 | 0.101177  | 0.166637  | 2.710432 | 0.547412 | 0.695731 | 13.39276 | 6.417332 | 1.004979 |
| 13460 | TRH       | 7.497066 | 2.318982 | 1.0962   | 2.115474 | 0.03439   | 0.067923  | 0        | 2.737059 | 4.87012  | 15.62489 | 10.69555 | 11.05477 |
| 2831  | PRRT1B    | 64.30425 | 2.317997 | 0.348818 | 6.645288 | 3.03E-11  | 2.84E-10  | 18.97302 | 27.37059 | 18.08902 | 113.8385 | 91.98176 | 115.5726 |
| 20363 | LOC119626 | 1.715282 | 2.317563 | 2.395784 | 0.967351 | 0.333369  | 0.435231  | 0        | 1.642235 | 0        | 2.232127 | 6.417332 | 0        |
| 17729 | ANGPT4    | 4.133905 | 2.31754  | 1.679865 | 0.137599 | 0.16771   | 0.251485  | 0        | 0        | 4.174388 | 8.928508 | 10.69555 | 1.004979 |
| 6644  | STYXL2    | 19.36743 | 2.316221 | 0.596905 | 3.880387 | 0.000104  | 0.000417  | 6.505036 | 7.116354 | 5.565851 | 31.24978 | 40.6431  | 25.12449 |
| 19666 | FBP1      | 1.72901  | 2.31591  | 2.153816 | 1.075259 | 0.282259  | 0.381565  | 1.084173 | 0.547412 | 0        | 4.464254 | 4.278221 | 0        |
| 14501 | LOC103237 | 6.213668 | 2.314728 | 1.20233  | 1.925203 | 0.054204  | 0.099373  | 0        | 2.737059 | 3.478657 | 8.928508 | 17.11289 | 5.024897 |
| 2405  | LOC119627 | 91.61558 | 2.314423 | 0.318529 | 7.265975 | 3.70E-13  | 4.09E-12  | 38.48813 | 33.39212 | 19.48048 | 167.4095 | 141.1813 | 149.7419 |
| 15389 | LOC103216 | 5.361896 | 2.3144   | 1.31363  | 1.761836 | 0.078097  | 0.134915  | 0.542086 | 3.284471 | 1.391463 | 6.696381 | 19.252   | 1.004979 |
| 9666  | LOC119625 | 12.77099 | 2.31431  | 0.786794 | 2.941442 | 0.003267  | 0.008985  | 3.252518 | 3.284471 | 6.261582 | 13.39276 | 36.36488 | 14.06971 |
| 428   | TRABD2B   | 403.386  | 2.313851 | 0.150976 | 15.3259  | 5.13E-53  | 3.19E-51  | 133.8953 | 142.8745 | 128.7103 | 662.9417 | 652.4288 | 699.4657 |
| 16910 | LOC103235 | 3.436329 | 2.313111 | 1.537478 | 1.504484 | 0.132457  | 0.208232  | 0.542086 | 2.189647 | 0.695731 | 11.16063 | 0        | 6.029877 |
| 8278  | LOC103237 | 18.17726 | 2.312978 | 0.696499 | 3.320863 | 0.000897  | 0.002882  | 7.047123 | 2.737059 | 8.348776 | 26.78552 | 47.06043 | 17.08465 |
| 15727 | FOXN4     | 5.976565 | 2.312833 | 1.350083 | 1.713104 | 0.086693  | 0.146547  | 0        | 0.547412 | 5.565851 | 4.464254 | 19.252   | 6.029877 |
| 15031 | LOC119627 | 5.840337 | 2.312816 | 1.265714 | 1.827282 | 0.067657  | 0.119664  | 0        | 1.094824 | 4.87012  | 15.62489 | 6.417332 | 7.034856 |
| 18948 | LOC119625 | 1.932219 | 2.312325 | 1.935262 | 1.194838 | 0.23215   | 0.325718  | 0        | 0.547412 | 1.391463 | 2.232127 | 6.417332 | 1.004979 |
| 558   | CUNH15or  | 402.2975 | 2.311863 | 0.164246 | 14.07557 | 5.37E-45  | 2.56E-43  | 126.3061 | 131.3788 | 146.1036 | 705.3521 | 718.7412 | 585.903  |
| 16535 | CEACAM6   | 3.673016 | 2.310937 | 1.472591 | 1.5693   | 0.116578  | 0.187434  | 1.626259 | 0        | 2.087194 | 11.16063 | 2.139111 | 5.024897 |
| 15799 | LOC103224 | 5.062524 | 2.310805 | 1.357908 | 1.701738 | 0.088804  | 0.149431  | 1.084173 | 0        | 4.174388 | 2.232127 | 12.83466 | 10.04979 |
| 242   | CORO2B    | 866.1192 | 2.310786 | 0.123703 | 18.68009 | 7.19E-78  | 7.90E-76  | 266.1644 | 291.2231 | 315.862  | 1428.561 | 1407.535 | 1487.37  |
| 150   | NRBP2     | 4034.929 | 2.310391 | 0.104649 | 22.07748 | 5.20E-108 | 9.20E-106 | 1294.502 | 1485.676 | 1282.929 | 6482.097 | 6419.471 | 7244.897 |
| 10038 | LOC119624 | 15.9327  | 2.308388 | 0.809005 | 2.853367 | 0.004326  | 0.011456  | 2.710432 | 1.642235 | 11.82743 | 31.24978 | 32.08666 | 16.07967 |
| 17904 | LOC119627 | 2.586804 | 2.307843 | 1.695856 | 1.360872 | 0.173554  | 0.257704  | 0.542086 | 0        | 2.087194 | 4.464254 | 6.417332 | 2.009959 |
| 6543  | PCDH17    | 24.46057 | 2.305995 | 0.587947 | 3.922117 | 8.78E-05  | 0.000357  | 12.46799 | 4.379295 | 7.653045 | 33.4819  | 55.61688 | 33.16432 |
| 14241 | TEX46     | 4.681182 | 2.305944 | 1.17129  | 1.968722 | 0.048985  | 0.091426  | 1.084173 | 2.189647 | 1.391463 | 6.696381 | 10.69555 | 6.029877 |
| 19556 | LOC103240 | 1.916716 | 2.303594 | 2.113377 | 1.090007 | 0.27571   | 0.374809  | 0        | 0.547412 | 1.391463 | 0        | 8.556443 | 1.004979 |
| 2951  | LOC119620 | 61.95176 | 2.301993 | 0.354865 | 6.486957 | 8.76E-11  | 7.89E-10  | 18.43094 | 16.96977 | 27.82925 | 102.6778 | 96.25998 | 109.5428 |
| 8335  | HSPA12B   | 19.80925 | 2.300588 | 0.696682 | 3.302207 | 0.000959  | 0.00306   | 3.794605 | 4.379295 | 11.82743 | 35.71403 | 47.06043 | 16.07967 |



|       |           |          |          |          |          |           |           |          |          |          |          |          |          |
|-------|-----------|----------|----------|----------|----------|-----------|-----------|----------|----------|----------|----------|----------|----------|
| 7480  | RASGRP2   | 18.3564  | 2.299385 | 0.644085 | 3.570001 | 0.000357  | 0.001269  | 9.757555 | 4.379295 | 4.174388 | 33.4819  | 34.22577 | 24.11951 |
| 10738 | LOC119621 | 11.19994 | 2.299121 | 0.856857 | 2.683202 | 0.007292  | 0.018054  | 2.168345 | 1.642235 | 7.653045 | 24.5534  | 17.11289 | 14.06971 |
| 2294  | POU2F2    | 155.037  | 2.298734 | 0.309334 | 7.431226 | 1.08E-13  | 1.25E-12  | 29.27266 | 53.09895 | 75.13899 | 283.4801 | 263.1106 | 226.1204 |
| 18180 | LOC119624 | 2.317337 | 2.296301 | 1.75863  | 1.305733 | 0.191643  | 0.280244  | 0.542086 | 1.094824 | 0.695731 | 0        | 8.556443 | 3.014938 |
| 283   | ZNF385B   | 1152.645 | 2.295583 | 0.128871 | 17.81308 | 5.59E-71  | 5.26E-69  | 345.8511 | 443.951  | 381.2608 | 1892.844 | 1828.94  | 2023.024 |
| 16034 | LOC119620 | 3.789555 | 2.294165 | 1.381914 | 1.660136 | 0.096887  | 0.160643  | 1.626259 | 2.189647 | 0        | 4.464254 | 6.417332 | 8.039836 |
| 236   | PLPP3     | 1000.768 | 2.293757 | 0.121511 | 18.87695 | 1.76E-79  | 1.99E-77  | 319.831  | 360.197  | 338.1254 | 1707.577 | 1525.186 | 1753.689 |
| 14015 | LOC103225 | 8.118076 | 2.2932   | 1.140692 | 2.010358 | 0.044393  | 0.08421   | 0        | 2.737059 | 5.565851 | 6.696381 | 25.66933 | 8.039836 |
| 625   | MAP1A     | 351.2598 | 2.29221  | 0.172047 | 13.32314 | 1.70E-40  | 7.22E-39  | 101.3702 | 135.2107 | 121.0573 | 558.0317 | 598.951  | 592.9379 |
| 9858  | EPHA1     | 16.19195 | 2.291631 | 0.792585 | 2.891339 | 0.003836  | 0.010345  | 2.168345 | 3.831883 | 10.43597 | 29.01765 | 40.6431  | 11.05477 |
| 1856  | LAMB3     | 124.5963 | 2.29147  | 0.276502 | 8.287338 | 1.16E-16  | 1.66E-15  | 39.03022 | 37.77142 | 50.09266 | 169.6417 | 263.1106 | 187.9312 |
| 16567 | LOC119618 | 3.883135 | 2.29012  | 1.465642 | 1.562536 | 0.118162  | 0.189614  | 0        | 0.547412 | 3.478657 | 6.696381 | 8.556443 | 4.019918 |
| 5527  | PDE4C     | 26.75269 | 2.289746 | 0.520298 | 4.400835 | 1.08E-05  | 5.19E-05  | 9.215468 | 9.306001 | 8.348776 | 46.87467 | 55.61688 | 31.15436 |
| 13285 | CPLX3     | 9.941614 | 2.289266 | 1.064126 | 2.15131  | 0.031452  | 0.062941  | 0        | 3.831883 | 6.261582 | 17.85702 | 25.66933 | 6.029877 |
| 9498  | EVPLL     | 12.69851 | 2.288896 | 0.767042 | 2.984055 | 0.002845  | 0.007962  | 4.878777 | 4.926706 | 2.782925 | 29.01765 | 23.53022 | 11.05477 |
| 939   | LOC119622 | 253.9768 | 2.287854 | 0.203031 | 11.26852 | 1.88E-29  | 5.31E-28  | 75.89209 | 81.56436 | 102.9682 | 437.4969 | 363.6488 | 462.2906 |
| 18890 | SMIM2     | 2.556686 | 2.287408 | 1.89797  | 1.205186 | 0.228131  | 0.321046  | 0        | 0.547412 | 2.087194 | 0        | 10.69555 | 2.009959 |
| 10709 | LOC103242 | 13.55351 | 2.286922 | 0.850309 | 2.689518 | 0.007156  | 0.017765  | 1.084173 | 4.379295 | 8.348776 | 20.08914 | 36.36488 | 11.05477 |
| 11323 | ZNF804B   | 8.948915 | 2.286462 | 0.895872 | 2.552218 | 0.010704  | 0.025132  | 2.168345 | 1.642235 | 5.565851 | 13.39276 | 12.83466 | 18.08963 |
| 7885  | SLC4A9    | 15.65121 | 2.28587  | 0.663446 | 3.445449 | 0.00057   | 0.001922  | 6.505036 | 4.379295 | 4.87012  | 31.24978 | 27.80844 | 19.09461 |
| 13642 | LOC119623 | 6.905648 | 2.28423  | 1.097716 | 2.080893 | 0.037444  | 0.072969  | 0.542086 | 1.094824 | 5.565851 | 15.62489 | 8.556443 | 10.04979 |
| 906   | EGR3      | 299.7929 | 2.284065 | 0.199701 | 11.43743 | 2.72E-30  | 7.98E-29  | 84.02339 | 122.0728 | 99.48959 | 569.1924 | 472.7435 | 451.2358 |
| 737   | LOC119623 | 331.726  | 2.283502 | 0.181707 | 12.56693 | 3.21E-36  | 1.16E-34  | 110.5856 | 113.8617 | 116.1871 | 555.7996 | 457.7697 | 636.152  |
| 6385  | NME9      | 28.01319 | 2.283227 | 0.572917 | 3.98527  | 6.74E-05  | 0.000281  | 8.131296 | 7.663765 | 12.53216 | 51.33892 | 66.31293 | 22.10955 |
| 10731 | DMBT1     | 14.39402 | 2.283201 | 0.850474 | 2.684623 | 0.007261  | 0.017989  | 1.626259 | 2.737059 | 10.43597 | 17.85702 | 40.6431  | 13.06473 |
| 4336  | LOC119623 | 37.70889 | 2.281883 | 0.44493  | 5.128634 | 2.92E-07  | 1.79E-06  | 13.01007 | 15.32753 | 9.740239 | 75.89232 | 62.03421 | 50.24897 |
| 16115 | PXT1      | 3.406744 | 2.280956 | 1.388413 | 1.642851 | 0.100414  | 0.165643  | 1.626259 | 0.547412 | 1.391463 | 6.696381 | 2.139111 | 8.039836 |
| 10789 | LOC119623 | 15.6868  | 2.280649 | 0.853298 | 2.672745 | 0.007523  | 0.018538  | 3.252518 | 1.094824 | 11.82743 | 20.08914 | 42.78221 | 15.07469 |
| 72    | NEU1      | 9532.702 | 2.28061  | 0.085756 | 26.59405 | 7.95E-156 | 2.94E-153 | 3343.589 | 3066.601 | 3354.121 | 15667.3  | 15433.68 | 16330.92 |
| 3330  | ZNF880    | 57.38827 | 2.280299 | 0.379114 | 6.014818 | 1.80E-09  | 1.44E-08  | 18.43094 | 25.18094 | 14.61036 | 87.05295 | 117.6511 | 81.40334 |
| 9497  | MEST      | 14.40515 | 2.280094 | 0.764026 | 2.984312 | 0.002842  | 0.007956  | 5.420864 | 1.642235 | 7.653045 | 24.5534  | 32.08666 | 15.07469 |
| 1156  | LOC119623 | 243.3    | 2.279043 | 0.221261 | 10.30026 | 7.03E-25  | 1.62E-23  | 89.98634 | 66.23683 | 92.53227 | 395.0865 | 481.2999 | 334.6582 |
| 14312 | TPH1      | 4.705015 | 2.278595 | 1.163303 | 1.95873  | 0.050144  | 0.093132  | 1.626259 | 1.094824 | 2.087194 | 6.696381 | 10.69555 | 6.029877 |
| 15968 | LOC119623 | 5.214719 | 2.277799 | 1.362917 | 1.671267 | 0.094669  | 0.157613  | 0.542086 | 0        | 4.87012  | 11.16063 | 10.69555 | 4.019918 |
| 13312 | LOC103230 | 7.58925  | 2.277138 | 1.061878 | 2.144443 | 0.031997  | 0.063896  | 1.084173 | 4.379295 | 2.087194 | 17.85702 | 17.11289 | 3.014938 |
| 469   | LYZ       | 2214.242 | 2.274841 | 0.152763 | 14.89131 | 3.75E-50  | 2.13E-48  | 854.3281 | 562.7393 | 858.5325 | 3729.884 | 3743.444 | 3536.523 |
| 20960 | SLC1A7    | 1.310946 | 2.274554 | 2.573063 | 0.883987 | 0.376703  | 0.477707  | 0        | 0        | 1.391463 | 4.464254 | 0        | 2.009959 |
| 20961 | LOC119625 | 1.310946 | 2.274554 | 2.573063 | 0.883987 | 0.376703  | 0.477707  | 0        | 0        | 1.391463 | 4.464254 | 0        | 2.009959 |
| 20962 | LOC119620 | 1.310946 | 2.274554 | 2.573063 | 0.883987 | 0.376703  | 0.477707  | 0        | 0        | 1.391463 | 4.464254 | 0        | 2.009959 |
| 20964 | LOC103248 | 1.310946 | 2.274554 | 2.573063 | 0.883987 | 0.376703  | 0.477707  | 0        | 0        | 1.391463 | 4.464254 | 0        | 2.009959 |
| 16949 | LOC119626 | 2.994335 | 2.274105 | 1.516464 | 1.49961  | 0.133715  | 0.209731  | 0.542086 | 1.094824 | 1.391463 | 2.232127 | 10.69555 | 2.009959 |
| 2832  | LOC119624 | 73.21933 | 2.272893 | 0.342057 | 6.64477  | 3.04E-11  | 2.85E-10  | 26.56223 | 18.06459 | 30.61218 | 147.3204 | 111.2338 | 105.5228 |
| 15276 | LOC119615 | 4.032986 | 2.271045 | 1.27301  | 1.783996 | 0.074424  | 0.129521  | 0.542086 | 1.642235 | 2.087194 | 4.464254 | 6.417332 | 9.044815 |
| 11333 | KCNH6     | 10.63487 | 2.269821 | 0.890052 | 2.55021  | 0.010766  | 0.025254  | 4.336691 | 2.189647 | 4.174388 | 24.5534  | 23.53022 | 5.024897 |
| 17468 | LOC119626 | 5.257769 | 2.269777 | 1.602607 | 1.416303 | 0.156687  | 0.238476  | 0.542086 | 0        | 4.87012  | 11.16063 | 14.97377 | 0        |
| 5585  | ADGRG3    | 27.56487 | 2.269763 | 0.518326 | 4.37903  | 1.19E-05  | 5.67E-05  | 9.215468 | 9.853413 | 9.044508 | 64.73168 | 36.36488 | 36.17926 |
| 20427 | HESS      | 1.295443 | 2.269593 | 2.369829 | 0.957703 | 0.338212  | 0.44015   | 0        | 0        | 1.391463 | 2.232127 | 2.139111 | 2.009959 |
| 20428 | LOC103233 | 1.295443 | 2.269593 | 2.369829 | 0.957703 | 0.338212  | 0.44015   | 0        | 0        | 1.391463 | 2.232127 | 2.139111 | 2.009959 |
| 12661 | LOC103233 | 7.206568 | 2.268986 | 1.000418 | 2.268038 | 0.023327  | 0.048981  | 4.336691 | 1.642235 | 1.391463 | 6.696381 | 17.11289 | 12.05975 |
| 20073 | LOC103215 | 1.966419 | 2.268305 | 2.230786 | 1.016819 | 0.30924   | 0.409562  | 0        | 0        | 2.087194 | 6.696381 | 0        | 3.014938 |
| 19422 | LOC103216 | 1.950916 | 2.267973 | 2.034463 | 1.114777 | 0.264946  | 0.362642  | 0        | 0        | 2.087194 | 4.464254 | 2.139111 | 3.014938 |
| 19423 | ARL13A    | 1.950916 | 2.267973 | 2.034463 | 1.114777 | 0.264946  | 0.362642  | 0        | 0        | 2.087194 | 4.464254 | 2.139111 | 3.014938 |
| 7930  | TSP02     | 14.99248 | 2.267726 | 0.661037 | 3.430556 | 0.000602  | 0.002019  | 4.878777 | 4.379295 | 6.261582 | 26.78552 | 23.53022 | 24.11951 |
| 11097 | LRTM2     | 16.42733 | 2.267711 | 0.870181 | 2.606023 | 0.00916   | 0.021945  | 2.168345 | 1.642235 | 13.2189  | 24.5534  | 44.92132 | 12.05975 |
| 7332  | LOC103215 | 21.93032 | 2.267451 | 0.626011 | 3.622064 | 0.000292  | 0.00106   | 10.84173 | 3.831883 | 7.653045 | 37.94616 | 49.19955 | 22.10955 |
| 21384 | LOC119624 | 1.092234 | 2.266127 | 2.768983 | 0.818397 | 0.413131  | 0.513612  | 1.084173 | 0        | 0        | 4.464254 | 0        | 1.004979 |
| 1094  | SAMD9     | 195.6571 | 2.265746 | 0.215059 | 10.53545 | 5.93E-26  | 1.44E-24  | 55.8349  | 78.8273  | 67.48594 | 339.2833 | 305.8928 | 326.6183 |
| 10092 | DNAAF1    | 12.04438 | 2.265225 | 0.797499 | 2.840409 | 0.004506  | 0.011869  | 2.168345 | 6.568942 | 3.478657 | 22.32127 | 25.66933 | 12.05975 |
| 13735 | SEPTIN1   | 8.49174  | 2.264464 | 1.097337 | 2.063599 | 0.039056  | 0.075595  | 4.336691 | 2.737059 | 1.391463 | 20.08914 | 21.39111 | 1.004979 |
| 20277 | RNF224    | 18.80487 | 2.264326 | 2.302572 | 0.98339  | 0.325415  | 0.426649  | 0        | 0        | 19.48048 | 33.4819  | 42.78221 | 17.08465 |
| 20886 | RPTN      | 1.040591 | 2.264058 | 2.537771 | 0.892144 | 0.372316  | 0.473885  | 0.542086 | 0.547412 | 0        | 0        | 2.139111 | 3.014938 |
| 17728 | LOC119623 | 2.720265 | 2.261492 | 1.639008 | 1.379793 | 0.16765   | 0.251409  | 1.626259 | 0.547412 | 0.695731 | 0        | 6.417332 | 7.034856 |
| 669   | SAMD9L    | 717.6757 | 2.260953 | 0.173859 | 13.00448 | 1.15E-38  | 4.58E-37  | 228.7604 | 315.3092 | 198.9792 | 1113.831 | 1165.815 | 1283.359 |
| 7711  | LOC103233 | 28.50032 | 2.260765 | 0.647999 | 3.488838 | 0.000485  | 0.001673  | 7.589209 | 3.831883 | 18.08902 | 44.64254 | 72.72976 | 24.11951 |
| 1692  | MHC-DMB   | 127.346  | 2.260597 | 0.258382 | 8.749036 | 2.15E-18  | 3.38E-17  | 49.87195 | 35.03436 | 47.30973 | 227.677  | 186.1026 | 218.0805 |
| 19693 | LOC103225 | 1.679674 | 2.260478 | 2.110528 | 1.071048 | 0.284148  | 0.383568  | 1.084173 | 0        | 0.695731 | 0        | 4.278221 | 4.019918 |
| 14753 | UBASH3A   | 5.738788 | 2.25989  | 1.20153  | 1.880843 | 0.059993  | 0.108108  | 0.542086 | 3.284471 | 2.087194 | 2.232127 | 19.252   | 7.034856 |
| 8631  | SULF1     | 17.2876  | 2.259868 | 0.701873 | 3.219766 | 0.001283  | 0.003952  | 3.252518 | 8.758589 | 5.565851 | 35.71403 | 36.36488 | 14.06971 |
| 18290 | LOC103215 | 3.29889  | 2.259153 | 1.757936 | 1.285117 | 0.198751  | 0.28889   | 0        | 0        | 3.478657 | 11.16063 | 2.139111 | 3.014938 |
| 5140  | NRL       | 33.35113 | 2.258358 | 0.490153 | 4.607455 | 4.08E-06  | 2.11E-05  | 13.01007 | 7.663765 | 13.91463 | 42.41041 | 74.86887 | 48.23901 |
| 21418 | RNF183    | 1.09401  | 2.255819 | 2.767599 | 0.815082 | 0.415026  | 0.515149  | 0        | 0.094824 | 0        | 4.464254 | 0        | 1.004979 |
| 17543 | LOC119623 | 2.37     |          |          |          |           |           |          |          |          |          |          |          |



|       |           |          |          |          |          |           |           |          |          |          |           |          |          |
|-------|-----------|----------|----------|----------|----------|-----------|-----------|----------|----------|----------|-----------|----------|----------|
| 7516  | MMRN2     | 21.1268  | 2.252657 | 0.633966 | 3.553278 | 0.00038   | 0.001346  | 4.336691 | 5.474118 | 12.52316 | 22.32127  | 44.92132 | 37.18424 |
| 18794 | LOC103222 | 2.627914 | 2.251775 | 1.847375 | 1.218906 | 0.22288   | 0.315274  | 0        | 0        | 2.782925 | 6.696381  | 4.278221 | 2.009959 |
| 69    | KRT8      | 15828.74 | 2.250481 | 0.083457 | 26.96571 | 3.73E-160 | 1.44E-157 | 5544.459 | 5562.799 | 5387.048 | 26245.35  | 24751.65 | 27481.16 |
| 11218 | TAS2R4    | 9.529278 | 2.249265 | 0.872661 | 2.577479 | 0.009952  | 0.023586  | 2.168345 | 2.189647 | 5.565851 | 20.08914  | 17.11289 | 10.04979 |
| 14412 | KIF19     | 11.73587 | 2.248134 | 1.158028 | 1.941347 | 0.052216  | 0.09632   | 0        | 0.547412 | 11.82743 | 22.32127  | 25.66933 | 10.04979 |
| 11956 | LOC119615 | 10.78706 | 2.246962 | 0.931155 | 2.413091 | 0.015818  | 0.035172  | 2.168345 | 2.737059 | 6.261582 | 11.16063  | 36.36488 | 6.029877 |
| 7139  | LOC103222 | 18.2413  | 2.246906 | 0.609934 | 3.683851 | 0.00023   | 0.000856  | 4.336691 | 7.116354 | 7.653045 | 31.24978  | 29.94755 | 29.1444  |
| 21159 | LOC103245 | 1.332471 | 2.246382 | 2.621337 | 0.85696  | 0.391467  | 0.491854  | 0        | 0        | 1.391463 | 4.464254  | 2.139111 | 0        |
| 19590 | CUNH4orf4 | 1.972441 | 2.245436 | 2.065339 | 1.0872   | 0.276949  | 0.375819  | 0        | 0        | 2.087194 | 4.464254  | 4.278221 | 1.004979 |
| 19591 | LOC103222 | 1.972441 | 2.245436 | 2.065339 | 1.0872   | 0.276949  | 0.375819  | 0        | 0        | 2.087194 | 4.464254  | 4.278221 | 1.004979 |
| 11360 | AR        | 11.64775 | 2.244724 | 0.881585 | 2.546238 | 0.010889  | 0.025483  | 2.710432 | 4.379295 | 4.87012  | 13.39276  | 38.50399 | 6.029877 |
| 16230 | CT8L2     | 3.690031 | 2.244081 | 1.383953 | 1.6215   | 0.10491   | 0.171845  | 0.542086 | 0.547412 | 2.782925 | 6.696381  | 8.556443 | 3.014938 |
| 157   | ST3GAL1   | 10177.05 | 2.242858 | 0.103231 | 21.72659 | 1.15E-104 | 1.95E-102 | 3550.124 | 3755.792 | 3346.468 | 16408.37  | 15348.12 | 18653.42 |
| 15894 | ARHGAP25  | 3.450682 | 2.242822 | 1.330614 | 1.685554 | 0.091882  | 0.153685  | 1.084173 | 1.094824 | 1.391463 | 6.696381  | 6.417332 | 4.019918 |
| 18184 | LOC119615 | 2.358447 | 2.242581 | 1.718497 | 1.304966 | 0.191904  | 0.280564  | 0        | 1.094824 | 1.391463 | 2.232127  | 6.417332 | 3.014938 |
| 21094 | LOC119627 | 1.279941 | 2.242178 | 2.590309 | 0.865603 | 0.386708  | 0.487326  | 0        | 0        | 1.391463 | 0         | 4.278221 | 2.009959 |
| 21095 | LOC119615 | 1.279941 | 2.242178 | 2.590309 | 0.865603 | 0.386708  | 0.487326  | 0        | 0        | 1.391463 | 0         | 4.278221 | 2.009959 |
| 13908 | ACADL     | 7.673943 | 2.241106 | 1.104298 | 2.029439 | 0.042414  | 0.081073  | 2.168345 | 2.189647 | 3.478657 | 20.08914  | 17.11289 | 1.004979 |
| 18311 | CALB2     | 2.409203 | 2.240751 | 1.749902 | 1.2805   | 0.200369  | 0.290892  | 1.084173 | 0        | 1.391463 | 6.696381  | 4.278221 | 1.004979 |
| 14298 | LOC119615 | 5.219914 | 2.239749 | 1.141597 | 1.961944 | 0.049769  | 0.092538  | 2.168345 | 1.094824 | 2.087194 | 13.39276  | 8.556443 | 4.019918 |
| 14731 | LOC119628 | 5.135491 | 2.239409 | 1.188993 | 1.88345  | 0.059639  | 0.107631  | 2.710432 | 0.547412 | 2.087194 | 4.464254  | 14.97377 | 6.029877 |
| 10543 | TRIM54    | 14.66904 | 2.23938  | 0.81878  | 2.735021 | 0.006238  | 0.015729  | 0.542086 | 6.568942 | 8.348776 | 26.78552  | 25.66933 | 20.09959 |
| 13105 | LIN28A    | 9.886525 | 2.239179 | 1.023936 | 2.186836 | 0.028755  | 0.058332  | 1.626259 | 0.547412 | 8.348776 | 8.928508  | 27.80844 | 12.05975 |
| 19987 | LOC103245 | 1.771008 | 2.23868  | 2.170322 | 1.031497 | 0.302308  | 0.042104  | 0        | 1.094824 | 0.695731 | 6.696381  | 2.139111 | 0        |
| 11297 | LOC119627 | 12.19365 | 2.237883 | 0.87429  | 2.559657 | 0.010478  | 0.024657  | 3.252518 | 4.379295 | 4.87012  | 24.5534   | 32.08666 | 4.019918 |
| 17482 | LOC119627 | 3.03367  | 2.237765 | 1.581411 | 1.415043 | 0.157056  | 0.238836  | 1.084173 | 0        | 2.087194 | 4.464254  | 8.556443 | 2.009959 |
| 6371  | PHKG1     | 27.83215 | 2.237491 | 0.560216 | 3.993982 | 6.50E-05  | 0.000271  | 11.9259  | 10.40082 | 6.261582 | 49.10679  | 64.17332 | 25.12449 |
| 15593 | LOC119628 | 3.887443 | 2.237208 | 1.29297  | 1.730287 | 0.083579  | 0.142497  | 2.168345 | 1.094824 | 0.695731 | 8.928508  | 6.417332 | 4.019918 |
| 232   | CAMK2B    | 1017.668 | 2.236444 | 0.117742 | 18.99443 | 1.90E-80  | 2.17E-78  | 333.9252 | 372.7874 | 363.8675 | 1624.988  | 1623.585 | 1786.853 |
| 96    | SERPINE2  | 65575.03 | 2.236381 | 0.09151  | 24.43864 | 6.65E-132 | 1.84E-129 | 22815.33 | 24262.39 | 21803.53 | 106459.1  | 101671.9 | 116437.9 |
| 17950 | LOC103245 | 3.92938  | 2.236149 | 1.654963 | 1.351177 | 0.176639  | 0.261612  | 0        | 0        | 4.174388 | 6.696381  | 10.69555 | 2.009959 |
| 19245 | H1FOO     | 1.718477 | 2.236108 | 1.952539 | 1.145231 | 0.252113  | 0.348251  | 0        | 1.094824 | 0.695731 | 2.232127  | 4.278221 | 2.009959 |
| 19246 | LOC103235 | 1.718477 | 2.236108 | 1.952539 | 1.145231 | 0.252113  | 0.348251  | 0        | 1.094824 | 0.695731 | 2.232127  | 4.278221 | 2.009959 |
| 10089 | ADRA2B    | 11.61862 | 2.235969 | 0.787138 | 2.840632 | 0.004502  | 0.011864  | 2.168345 | 3.284471 | 6.957314 | 20.08914  | 17.11289 | 20.09959 |
| 15026 | RIT2      | 7.604796 | 2.235593 | 1.22269  | 1.828422 | 0.067486  | 0.119401  | 0        | 1.094824 | 6.957314 | 11.16063  | 21.39111 | 5.024897 |
| 17278 | LOC119620 | 3.710669 | 2.235592 | 1.537917 | 1.453649 | 0.146044  | 0.224712  | 1.084173 | 0        | 2.782925 | 6.696381  | 10.69555 | 1.004979 |
| 21015 | TRNAF-GA  | 1.076732 | 2.235458 | 2.5468   | 0.877752 | 0.380078  | 0.480804  | 1.084173 | 0        | 0        | 2.232127  | 2.139111 | 1.004979 |
| 20206 | LOC103245 | 1.919911 | 2.234906 | 2.244229 | 0.995846 | 0.319325  | 0.420136  | 0        | 0        | 2.087194 | 0         | 6.417332 | 3.014938 |
| 16144 | LOC103235 | 4.351526 | 2.234393 | 1.363473 | 1.638752 | 0.101265  | 0.166757  | 0.542086 | 0.547412 | 3.478657 | 6.696381  | 12.83466 | 2.009959 |
| 13336 | F2RL3     | 6.51944  | 2.234131 | 1.043488 | 2.141022 | 0.032272  | 0.064334  | 1.626259 | 1.094824 | 4.174388 | 15.62489  | 8.556443 | 8.039836 |
| 15499 | LOC119626 | 4.109349 | 2.233489 | 1.280274 | 1.744539 | 0.081065  | 0.139049  | 1.084173 | 0.547412 | 2.782925 | 8.928508  | 4.278221 | 7.034856 |
| 11524 | KCNK7     | 10.58882 | 2.233443 | 0.890173 | 2.508999 | 0.012107  | 0.027931  | 2.168345 | 3.284471 | 5.565851 | 13.39276  | 32.08666 | 7.034856 |
| 7109  | MYLK2     | 24.19873 | 2.232369 | 0.604291 | 3.694196 | 0.000221  | 0.000825  | 10.84173 | 9.853413 | 4.174388 | 46.87467  | 51.33866 | 22.10955 |
| 12921 | RNF39     | 10.14499 | 2.229794 | 1.005382 | 2.217857 | 0.026565  | 0.054653  | 0        | 3.831883 | 6.957314 | 15.62489  | 21.39111 | 13.06473 |
| 21217 | LOC119627 | 1.316969 | 2.229682 | 2.629588 | 0.84792  | 0.396482  | 0.496677  | 0        | 0        | 1.391463 | 2.232127  | 4.278221 | 0        |
| 21218 | LOC119625 | 1.316969 | 2.229682 | 2.629588 | 0.84792  | 0.396482  | 0.496677  | 0        | 0        | 1.391463 | 2.232127  | 4.278221 | 0        |
| 21220 | BCL2L10   | 1.316969 | 2.229682 | 2.629588 | 0.84792  | 0.396482  | 0.496677  | 0        | 0        | 1.391463 | 2.232127  | 4.278221 | 0        |
| 21222 | LINGO3    | 1.316969 | 2.229682 | 2.629588 | 0.84792  | 0.396482  | 0.496677  | 0        | 0        | 1.391463 | 2.232127  | 4.278221 | 0        |
| 4230  | MEFV      | 48.11151 | 2.228826 | 0.428741 | 5.198539 | 2.01E-07  | 1.26E-06  | 23.30971 | 9.306001 | 18.08902 | 75.89232  | 87.70354 | 74.36848 |
| 21543 | LOC119625 | 1.061229 | 2.228688 | 2.792069 | 0.798221 | 0.424742  | 0.524117  | 1.084173 | 0        | 0        | 0         | 4.278221 | 1.004979 |
| 21544 | LOC103235 | 1.061229 | 2.228688 | 2.792069 | 0.798221 | 0.424742  | 0.524117  | 1.084173 | 0        | 0        | 0         | 4.278221 | 1.004979 |
| 590   | NLRCS     | 541.3629 | 2.227669 | 0.162483 | 13.71016 | 8.83E-43  | 3.98E-41  | 182.141  | 169.1503 | 222.634  | 863.8331  | 806.4447 | 1003.974 |
| 5414  | CALHM2    | 30.44015 | 2.227489 | 0.499993 | 4.455038 | 8.39E-06  | 4.12E-05  | 7.589209 | 13.6853  | 11.1317  | 53.57105  | 36.36488 | 60.29877 |
| 5459  | LOC119625 | 36.33495 | 2.226844 | 0.501929 | 4.436571 | 9.14E-06  | 4.45E-05  | 8.673382 | 15.32753 | 13.91463 | 62.49956  | 83.42532 | 34.1693  |
| 5245  | LOC119625 | 45.94942 | 2.225477 | 0.488479 | 4.555927 | 5.22E-06  | 2.64E-05  | 17.88885 | 12.59047 | 17.39328 | 1062.6778 | 91.98176 | 33.16432 |
| 19965 | NPPB      | 1.755505 | 2.224836 | 2.148084 | 1.035731 | 0.300328  | 0.399911  | 0        | 1.094824 | 0.695731 | 4.464254  | 4.278221 | 0        |
| 17350 | RTL4      | 3.493732 | 2.224479 | 1.545559 | 1.439272 | 0.150074  | 0.229954  | 1.084173 | 1.094824 | 1.391463 | 6.696381  | 10.69555 | 0        |
| 19326 | LOC119615 | 2.176764 | 2.223125 | 1.965273 | 1.131204 | 0.257969  | 0.354865  | 1.084173 | 1.094824 | 0        | 4.464254  | 6.417332 | 0        |
| 12732 | GRID1     | 8.90721  | 2.223105 | 0.987383 | 2.251513 | 0.024353  | 0.050847  | 0.542086 | 3.284471 | 5.565851 | 15.62489  | 21.39111 | 7.034856 |
| 2564  | LOC119624 | 117.5452 | 2.22251  | 0.316182 | 7.029219 | 2.08E-12  | 2.15E-11  | 34.69353 | 31.20247 | 59.8329  | 198.6593  | 149.7377 | 231.1453 |
| 11463 | LOC103245 | 9.355759 | 2.221754 | 0.880233 | 2.524051 | 0.011601  | 0.026905  | 2.168345 | 2.189647 | 5.565851 | 22.32127  | 12.83466 | 11.05477 |
| 20060 | LOC119628 | 1.738227 | 2.221124 | 2.179324 | 1.01918  | 0.308117  | 0.40832   | 1.084173 | 0        | 0.695731 | 2.232127  | 6.417332 | 0        |
| 11330 | LOC119620 | 9.288613 | 2.220878 | 0.870621 | 2.550914 | 0.010744  | 0.02521   | 1.626259 | 2.737059 | 5.565851 | 15.62489  | 17.11289 | 13.06473 |
| 1598  | LOC103235 | 126.679  | 2.220323 | 0.247205 | 8.981718 | 2.67E-19  | 4.43E-18  | 39.5723  | 49.26706 | 45.91827 | 209.8199  | 190.3808 | 225.1154 |
| 11711 | TLR7      | 11.24733 | 2.219476 | 0.898773 | 2.469451 | 0.013532  | 0.030719  | 0.542086 | 3.831883 | 7.653045 | 17.85702  | 23.53022 | 14.06971 |
| 20406 | SEMG2     | 1.941436 | 2.219331 | 2.311339 | 0.960193 | 0.336958  | 0.43899   | 0        | 0        | 2.087194 | 0         | 8.556443 | 1.004979 |
| 14468 | LOC119620 | 12.17132 | 2.218227 | 1.148959 | 1.930641 | 0.053527  | 0.098357  | 0        | 0.547412 | 12.52316 | 20.08914  | 27.80844 | 12.05975 |
| 102   | BACE2     | 5710.487 | 2.216193 | 0.091337 | 24.26396 | 4.71E-130 | 1.23E-127 | 2041.497 | 2032.54  | 1996.053 | 9283.416  | 8817.414 | 10092    |
| 10287 | LOC119627 | 13.39644 | 2.214892 | 0.793398 | 2.791652 | 0.005244  | 0.013552  | 3.252518 | 3.284471 | 7.653045 | 15.62489  | 38.50399 | 12.05975 |
| 1702  | LOC103225 | 113.9998 | 2.214519 | 0.25401  | 8.71823  | 2.83E-18  | 4.41E-17  | 38.48813 | 37.77142 | 45.22254 | 180.8023  | 196.7982 | 184.9162 |
| 4430  | TMEM178I  | 64.82817 | 2.214362 | 0.437763 | 5.058354 | 4.23E-07  | 2.54E-06  | 10.84173 | 21.34906 | 36.87376 | 124.9991  | 115.512  | 79.39338 |
| 1348  |           |          |          |          |          |           |           |          |          |          |           |          |          |



|       |          |           |          |          |          |          |          |          |          |          |          |          |          |
|-------|----------|-----------|----------|----------|----------|----------|----------|----------|----------|----------|----------|----------|----------|
| 21833 | LOC10324 | 1.301466  | 2.212886 | 2.932207 | 0.754683 | 0.450439 | 0.548378 | 0        | 0        | 1.391463 | 0        | 6.417332 | 0        |
| 21834 | LOC11962 | 1.301466  | 2.212886 | 2.932207 | 0.754683 | 0.450439 | 0.548378 | 0        | 0        | 1.391463 | 0        | 6.417332 | 0        |
| 21835 | DYDC2    | 1.301466  | 2.212886 | 2.932207 | 0.754683 | 0.450439 | 0.548378 | 0        | 0        | 1.391463 | 0        | 6.417332 | 0        |
| 21836 | CFAP161  | 1.301466  | 2.212886 | 2.932207 | 0.754683 | 0.450439 | 0.548378 | 0        | 0        | 1.391463 | 0        | 6.417332 | 0        |
| 21837 | LOC10324 | 1.301466  | 2.212886 | 2.932207 | 0.754683 | 0.450439 | 0.548378 | 0        | 0        | 1.391463 | 0        | 6.417332 | 0        |
| 12368 | LOC10323 | 11.49181  | 2.212481 | 0.950083 | 2.328725 | 0.019874 | 0.04272  | 0.542086 | 2.737059 | 9.044508 | 15.62489 | 29.94755 | 11.05477 |
| 5773  | KLHL4    | 27.45529  | 2.212331 | 0.516056 | 4.286999 | 1.81E-05 | 8.34E-05 | 6.505036 | 13.13788 | 9.740239 | 40.17829 | 44.92132 | 50.24897 |
| 5231  | PLXNA4   | 41.12013  | 2.212021 | 0.484751 | 4.56321  | 5.04E-06 | 2.56E-05 | 16.80468 | 10.40082 | 16.00182 | 87.05295 | 81.28621 | 35.17428 |
| 16527 | LOC11962 | 3.807989  | 2.211611 | 1.408353 | 1.570352 | 0.116333 | 0.18712  | 1.626259 | 1.094824 | 1.391463 | 0        | 10.69555 | 8.039836 |
| 8827  | APOB     | 14.4318   | 2.211263 | 0.698901 | 3.163914 | 0.001557 | 0.004688 | 2.710432 | 7.116354 | 5.565851 | 24.5534  | 23.53022 | 23.11453 |
| 13549 | KLHL38   | 11.95669  | 2.211101 | 1.053622 | 2.09857  | 0.035855 | 0.070352 | 0.542086 | 0.547412 | 11.82743 | 20.08914 | 25.66933 | 13.06473 |
| 18577 | LOC10322 | 2.611585  | 2.209881 | 1.78433  | 1.238493 | 0.215533 | 0.308427 | 1.626259 | 1.094824 | 0        | 8.928508 | 0        | 4.019918 |
| 3433  | LOC10321 | 51.25628  | 2.209506 | 0.37353  | 5.915207 | 3.31E-09 | 2.57E-08 | 17.88885 | 15.87494 | 20.87194 | 78.12444 | 98.39909 | 76.37844 |
| 14507 | GDAP1L1  | 6.745819  | 2.209305 | 1.148978 | 1.922843 | 0.0545   | 0.099874 | 4.336691 | 0        | 2.782925 | 15.62489 | 10.69555 | 7.034856 |
| 17818 | LOC11962 | 2.802119  | 2.209039 | 1.607602 | 1.37412  | 0.169404 | 0.252742 | 0.542086 | 1.642235 | 0.695731 | 2.232127 | 10.69555 | 1.004979 |
| 19471 | LOC10321 | 2.083489  | 2.208888 | 1.998671 | 1.105178 | 0.269082 | 0.367395 | 1.626259 | 0        | 0.695731 | 0        | 2.139111 | 8.039836 |
| 15155 | SMIM38   | 5.453866  | 2.208374 | 1.223431 | 1.805066 | 0.071064 | 0.124662 | 1.084173 | 0.547412 | 4.174388 | 8.928508 | 14.97377 | 3.014938 |
| 9888  | SOAT2    | 18.89452  | 2.207288 | 0.76471  | 2.886437 | 0.003896 | 0.010476 | 5.96295  | 1.094824 | 13.2189  | 33.4819  | 38.50399 | 21.10457 |
| 10402 | LOC11962 | 12.8122   | 2.204659 | 0.797038 | 2.766067 | 0.005674 | 0.014501 | 3.252518 | 2.737059 | 7.653045 | 20.08914 | 32.08666 | 11.05477 |
| 14570 | ARX      | 7.445892  | 2.203448 | 1.152605 | 1.911712 | 0.055913 | 0.102021 | 0.542086 | 0.547412 | 6.957314 | 15.62489 | 14.97377 | 6.029877 |
| 5485  | MYOZ3    | 41.64991  | 2.203326 | 0.49897  | 4.415751 | 1.01E-05 | 4.88E-05 | 8.673382 | 10.94824 | 25.04633 | 71.42806 | 85.56443 | 48.23901 |
| 14837 | GPR150   | 6.487865  | 2.202848 | 1.181623 | 1.864255 | 0.062286 | 0.111604 | 2.710432 | 3.284471 | 0.695731 | 6.696381 | 23.53022 | 2.009959 |
| 9661  | TMEM82   | 15.53576  | 2.20277  | 0.748322 | 2.943612 | 0.003244 | 0.008927 | 4.336691 | 4.379295 | 7.653045 | 35.71403 | 32.08666 | 9.044815 |
| 273   | TM4SF4   | 3259.859  | 2.202526 | 0.122778 | 17.93903 | 5.85E-72 | 5.69E-70 | 1261.435 | 968.9189 | 1262.057 | 5497.729 | 5037.606 | 5531.407 |
| 1596  | RP1      | 124.966   | 2.202005 | 0.245004 | 8.987634 | 2.53E-19 | 4.21E-18 | 44.45108 | 44.88777 | 44.52681 | 183.0344 | 228.8848 | 204.0108 |
| 10686 | ALDH3B2  | 10.47277  | 2.20159  | 0.816764 | 2.695503 | 0.007028 | 0.017485 | 2.710432 | 3.831883 | 4.87012  | 8.928508 | 21.39111 | 21.10457 |
| 16570 | SNX32    | 5.461663  | 2.200564 | 1.408583 | 1.562254 | 0.118228 | 0.189675 | 0        | 1.642235 | 4.174388 | 6.696381 | 19.252   | 1.004979 |
| 12555 | TFHD1    | 9.359211  | 2.200071 | 0.95977  | 2.29229  | 0.021889 | 0.046348 | 1.626259 | 2.737059 | 5.565851 | 13.39276 | 27.80844 | 5.024897 |
| 545   | DTFB     | 403.8754  | 2.199942 | 0.155475 | 14.14977 | 1.87E-45 | 9.14E-44 | 138.7741 | 135.7581 | 160.0182 | 651.7811 | 637.455  | 699.4657 |
| 18402 | FCRL4    | 2.414173  | 2.199774 | 1.740002 | 1.264237 | 0.206145 | 0.297814 | 0        | 0.547412 | 2.087194 | 6.696381 | 2.139111 | 3.014938 |
| 1110  | APO16    | 202.2195  | 2.19865  | 0.209727 | 10.48339 | 1.03E-25 | 2.47E-24 | 74.80792 | 78.27989 | 62.61582 | 341.5154 | 363.6488 | 292.449  |
| 327   | IL1R1    | 2126.75   | 2.198629 | 0.130773 | 16.81259 | 1.97E-63 | 1.60E-61 | 672.7292 | 901.5873 | 708.9503 | 3352.655 | 3366.96  | 3757.618 |
| 223   | LOC10323 | 1261.524  | 2.19855  | 0.113528 | 19.36575 | 1.50E-83 | 1.79E-81 | 464.568  | 435.1924 | 456.3998 | 2006.682 | 1955.147 | 2251.154 |
| 17649 | DEFB124  | 37.52666  | 2.197509 | 1.573364 | 1.39645  | 0.162579 | 0.244864 | 0        | 0.547412 | 3.478657 | 8.928508 | 8.556443 | 1.004979 |
| 3313  | CADM2    | 62.19357  | 2.196907 | 0.364303 | 6.030445 | 1.64E-09 | 1.31E-08 | 20.59928 | 29.56024 | 16.00182 | 111.6063 | 106.9555 | 88.43819 |
| 10648 | ZNF157   | 11.68228  | 2.195991 | 0.811669 | 2.705525 | 0.00682  | 0.017027 | 5.420864 | 2.737059 | 4.174388 | 15.62489 | 32.08666 | 10.04979 |
| 12823 | LOC10324 | 7.835674  | 2.195819 | 0.982878 | 2.23407  | 0.025478 | 0.052823 | 1.084173 | 4.379295 | 2.782925 | 15.62489 | 17.11289 | 6.029877 |
| 14366 | JSRP1    | 6.571707  | 2.194783 | 1.125949 | 1.949274 | 0.051263 | 0.094864 | 1.626259 | 0.547412 | 4.87012  | 13.39276 | 14.97377 | 4.019918 |
| 9325  | NAALADL1 | 26.86358  | 2.194398 | 0.725495 | 3.024692 | 0.002489 | 0.007096 | 5.420864 | 3.284471 | 20.17621 | 71.42806 | 42.78221 | 18.08963 |
| 5132  | SMOC1    | 36.33568  | 2.192894 | 0.475628 | 4.610522 | 4.02E-06 | 2.08E-05 | 9.215468 | 14.23271 | 15.30609 | 75.89232 | 64.17332 | 39.1942  |
| 12190 | LOC10323 | 8.662995  | 2.19202  | 0.925589 | 2.368244 | 0.017873 | 0.038978 | 2.168345 | 1.642235 | 5.565851 | 11.16063 | 21.39111 | 10.04979 |
| 14404 | LOC10322 | 6.503674  | 2.191618 | 1.128165 | 1.94264  | 0.05206  | 0.096085 | 1.626259 | 0.547412 | 4.87012  | 6.696381 | 19.252   | 6.029877 |
| 9574  | NLRP12   | 16.01593  | 2.189618 | 0.737993 | 2.96699  | 0.003007 | 0.008351 | 5.420864 | 3.284471 | 8.348776 | 40.17829 | 27.80844 | 11.05477 |
| 18858 | CXCL17   | 2.450313  | 2.189426 | 1.807821 | 1.211085 | 0.225863 | 0.318436 | 0.542086 | 0        | 2.087194 | 8.928508 | 2.139111 | 1.004979 |
| 19650 | AOC1     | 2.547799  | 2.189388 | 2.031564 | 1.077686 | 0.281174 | 0.380407 | 2.710432 | 0        | 0        | 0        | 8.556443 | 4.019918 |
| 10161 | LAMA2    | 17.80118  | 2.188846 | 0.775234 | 2.823465 | 0.004751 | 0.01243  | 1.626259 | 10.40082 | 6.957314 | 24.5534  | 49.19955 | 14.06971 |
| 16809 | LOC11962 | 3.681499  | 2.188255 | 1.436152 | 1.523693 | 0.127585 | 0.201788 | 1.084173 | 2.737059 | 0        | 6.696381 | 8.556443 | 3.014938 |
| 9283  | LOC10323 | 21.86917  | 2.187855 | 0.72059  | 3.036201 | 0.002396 | 0.006861 | 8.131296 | 1.642235 | 13.91463 | 26.78552 | 55.61688 | 25.12449 |
| 1688  | SLC43A3  | 125.8984  | 2.187719 | 0.249958 | 8.752365 | 2.09E-18 | 3.29E-17 | 39.5723  | 49.26706 | 46.614   | 220.9806 | 216.0502 | 182.9063 |
| 18866 | LOC11961 | 2.4511201 | 2.187107 | 1.807813 | 1.209808 | 0.226352 | 0.31896  | 0        | 0.547412 | 2.087194 | 8.928508 | 2.139111 | 1.004979 |
| 17953 | COX4I2   | 3.060165  | 2.186389 | 1.619193 | 1.350296 | 0.176921 | 0.261972 | 0        | 0.547412 | 2.782925 | 4.464254 | 8.556443 | 2.009959 |
| 17954 | CLDN5    | 3.060165  | 2.186389 | 1.619193 | 1.350296 | 0.176921 | 0.261972 | 0        | 0.547412 | 2.782925 | 4.464254 | 8.556443 | 2.009959 |
| 8236  | MYO1F    | 23.32494  | 2.186286 | 0.655435 | 3.335628 | 0.000851 | 0.002747 | 7.589209 | 10.94824 | 6.261582 | 22.32127 | 72.72976 | 20.09959 |
| 8361  | LOC10323 | 21.25384  | 2.186146 | 0.663574 | 3.294504 | 0.000986 | 0.003135 | 11.9259  | 4.379295 | 6.261582 | 31.24978 | 55.61688 | 18.08963 |
| 16725 | LOC10323 | 3.259353  | 2.182709 | 1.41922  | 1.537964 | 0.124058 | 0.197194 | 0.542086 | 2.189647 | 0.695731 | 6.696381 | 6.417332 | 3.014938 |
| 16767 | LOC10324 | 4.839032  | 2.182331 | 1.425921 | 1.530472 | 0.1259   | 0.199609 | 0        | 4.379295 | 0.695731 | 13.39276 | 8.556443 | 2.009959 |
| 16677 | LOC10321 | 3.482312  | 2.18178  | 1.411786 | 1.545405 | 0.122248 | 0.194877 | 0.542086 | 1.094824 | 2.087194 | 4.464254 | 10.69555 | 2.009959 |
| 16548 | SOX10    | 4.104839  | 2.180441 | 1.392404 | 1.565954 | 0.117359 | 0.188542 | 0        | 1.094824 | 3.478657 | 4.464254 | 8.556443 | 7.034856 |
| 8897  | LOC10323 | 39.00117  | 2.180272 | 0.693199 | 3.145232 | 0.00166  | 0.004959 | 4.878777 | 8.211177 | 29.22072 | 44.64254 | 121.9293 | 25.12449 |
| 729   | GRIN3B   | 295.2007  | 2.17769  | 0.172719 | 12.60832 | 1.90E-36 | 6.93E-35 | 101.3702 | 103.4608 | 116.8829 | 486.6037 | 451.3524 | 511.5345 |
| 17865 | LOC10322 | 3.503837  | 2.177669 | 1.593281 | 1.366783 | 0.171693 | 0.255455 | 0.542086 | 1.094824 | 2.087194 | 4.464254 | 12.83466 | 0        |
| 8729  | LOC11961 | 19.87226  | 2.17741  | 0.68179  | 3.193666 | 0.001405 | 0.004278 | 6.505036 | 7.663765 | 6.957314 | 35.71403 | 51.33866 | 11.05477 |
| 16136 | LOC11962 | 10.17666  | 2.177164 | 1.327835 | 1.639635 | 0.101081 | 0.166522 | 0        | 0        | 11.1317  | 26.78552 | 17.11289 | 6.029877 |
| 15078 | TMPRSS15 | 6.036133  | 2.176592 | 1.195755 | 1.820265 | 0.068719 | 0.121154 | 3.252518 | 1.094824 | 2.087194 | 2.232127 | 23.53022 | 4.019918 |
| 15495 | LOC11962 | 8.080464  | 2.175108 | 1.246295 | 1.74526  | 0.08094  | 0.138869 | 0        | 0.547412 | 8.348776 | 11.16063 | 21.39111 | 7.034856 |
| 6924  | ACTRT3   | 22.35474  | 2.174495 | 0.577544 | 3.765075 | 0.000166 | 0.000639 | 7.047123 | 5.474118 | 11.82743 | 35.71403 | 44.92132 | 29.1444  |
| 12422 | TBX21    | 11.78757  | 2.174114 | 0.938484 | 2.316623 | 0.005024 | 0.043925 | 0.542086 | 3.284471 | 9.044508 | 17.85702 | 29.94755 | 10.04979 |
| 4429  | SLC5A1   | 52.57182  | 2.172053 | 0.429361 | 5.058807 | 4.22E-07 | 2.53E-06 | 17.88885 | 10.94824 | 28.52499 | 87.05295 | 102.6773 | 68.3386  |
| 14197 | GUCA1B   | 6.357078  | 2.171976 | 1.098361 | 1.97747  | 0.047989 | 0.089862 | 2.168345 | 0.547412 | 4.174388 | 13.39276 | 12.83466 | 5.024897 |
| 2159  | SERTAD4  | 143.3518  | 2.171395 | 0.283074 | 7.670765 | 1.71E-14 | 2.11E-13 | 44.45108 | 73.35318 | 37.56949 | 252.2303 | 237.4413 | 215.0656 |
| 2468  | TMEM71   | 95.1951   | 2.169926 | 0.302817 | 7.16581  | 7.73E-13 | 8.33E-12 | 41.74065 | 33.392   |          |          |          |          |



|       |           |          |          |          |          |          |          |          |          |          |          |          |          |
|-------|-----------|----------|----------|----------|----------|----------|----------|----------|----------|----------|----------|----------|----------|
| 285   | ARRDC4    | 1464.635 | 2.168871 | 0.122038 | 17.77208 | 1.16E-70 | 1.08E-68 | 481.3727 | 605.9849 | 512.0583 | 2345.965 | 2320.935 | 2521.493 |
| 13633 | NOBOX     | 7.860264 | 2.168864 | 1.041793 | 2.081857 | 0.037356 | 0.07284  | 5.96295  | 1.642235 | 0.695731 | 17.85702 | 14.97377 | 6.029877 |
| 12996 | KLK7      | 23.02771 | 2.168585 | 0.983918 | 2.204029 | 0.027522 | 0.0563   | 1.084173 | 0.547412 | 23.65487 | 40.17829 | 55.61688 | 17.08465 |
| 210   | MYRF      | 2338.441 | 2.167057 | 0.109246 | 19.83653 | 1.44E-87 | 1.82E-85 | 801.2037 | 940.4535 | 814.7014 | 3685.242 | 3702.801 | 4086.247 |
| 12429 | LOC103214 | 9.518114 | 2.167025 | 0.935819 | 2.315645 | 0.020578 | 0.044015 | 0.542086 | 4.379295 | 5.565851 | 11.16063 | 21.39111 | 14.06971 |
| 11864 | BMX       | 10.31192 | 2.166611 | 0.890228 | 2.43377  | 0.014942 | 0.033483 | 1.626259 | 3.284471 | 6.261582 | 22.32127 | 21.39111 | 7.034856 |
| 18085 | FGB       | 2.602105 | 2.165812 | 1.634752 | 1.324857 | 0.185219 | 0.272272 | 1.626259 | 1.094824 | 0        | 4.464254 | 6.417332 | 2.009959 |
| 13870 | SPINK13   | 6.301248 | 2.165508 | 1.063485 | 2.036237 | 0.041727 | 0.079978 | 1.626259 | 3.831883 | 1.391463 | 15.62489 | 4.278221 | 11.05477 |
| 16879 | SLC38A11  | 3.8724   | 2.164235 | 1.433425 | 1.509835 | 0.131086 | 0.206464 | 0        | 2.189647 | 2.087194 | 2.232127 | 10.69555 | 6.029877 |
| 9675  | LOC119621 | 12.67896 | 2.163321 | 0.736512 | 2.937251 | 0.003311 | 0.009099 | 4.336691 | 3.831883 | 5.565851 | 29.01765 | 19.252   | 14.06971 |
| 17123 | EDNRA     | 3.501897 | 2.16306  | 1.463824 | 1.477678 | 0.139494 | 0.216577 | 0        | 1.094824 | 2.782925 | 6.696381 | 6.417332 | 4.019918 |
| 16522 | KLKB1     | 3.262547 | 2.162875 | 1.37678  | 1.570966 | 0.11619  | 0.186958 | 0.542086 | 1.642235 | 1.391463 | 6.696381 | 4.278221 | 5.024897 |
| 15272 | KDR       | 4.361692 | 2.162424 | 1.211734 | 1.78457  | 0.074331 | 0.129398 | 1.084173 | 2.189647 | 1.391463 | 8.928508 | 8.556443 | 4.019918 |
| 14185 | LOC119624 | 5.666352 | 2.162331 | 1.092373 | 1.979481 | 0.047762 | 0.089513 | 1.084173 | 1.642235 | 3.478657 | 8.928508 | 12.83466 | 6.029877 |
| 565   | NCF4      | 396.6259 | 2.162244 | 0.154619 | 13.98431 | 1.94E-44 | 9.14E-43 | 138.7741 | 140.6848 | 156.5396 | 611.6028 | 641.7332 | 690.4209 |
| 871   | KIRREL3   | 239.7262 | 2.161979 | 0.185044 | 11.68357 | 1.55E-31 | 4.72E-30 | 89.98634 | 86.49107 | 86.96642 | 386.158  | 363.6488 | 425.1063 |
| 18412 | LOC119625 | 2.588377 | 2.160927 | 1.710781 | 1.263123 | 0.206545 | 0.298213 | 0.542086 | 2.189647 | 0        | 2.232127 | 8.556443 | 2.009959 |
| 8284  | ASB12     | 20.02869 | 2.160856 | 0.651344 | 3.317534 | 0.000908 | 0.002914 | 3.252518 | 11.49565 | 6.957314 | 35.71403 | 40.6431  | 22.10955 |
| 17942 | SERPINB7  | 3.057563 | 2.160545 | 1.597126 | 1.35277  | 0.176129 | 0.260979 | 2.710432 | 0.547412 | 0        | 8.928508 | 2.139111 | 4.019918 |
| 16706 | LOC103221 | 3.485506 | 2.160388 | 1.401411 | 1.541581 | 0.123175 | 0.196014 | 0.542086 | 0.547412 | 2.782925 | 4.464254 | 8.556443 | 4.019918 |
| 16793 | LOC119615 | 4.199533 | 2.160387 | 1.414654 | 1.527148 | 0.126724 | 0.200624 | 0.542086 | 0.547412 | 3.478657 | 8.928508 | 10.69555 | 1.004979 |
| 14274 | LOC103231 | 5.409725 | 2.159195 | 1.098272 | 1.965993 | 0.049299 | 0.09183  | 2.710432 | 1.094824 | 2.087194 | 6.696381 | 12.83466 | 7.034856 |
| 346   | B3GNT7    | 1061.215 | 2.159046 | 0.131148 | 16.46267 | 6.80E-61 | 5.23E-59 | 361.5716 | 414.3907 | 391.001  | 1732.131 | 1531.603 | 1936.595 |
| 18183 | FATE1     | 2.180846 | 2.158893 | 1.654326 | 1.304998 | 0.191893 | 0.280564 | 0.542086 | 1.094824 | 0.695731 | 4.464254 | 4.278221 | 2.009959 |
| 306   | CDH6      | 10869.13 | 2.158327 | 0.124547 | 17.32941 | 2.82E-67 | 2.45E-65 | 3597.827 | 4781.642 | 3555.883 | 17591.39 | 16948.17 | 18739.85 |
| 12515 | OTOA      | 9.189774 | 2.157968 | 0.938815 | 2.298608 | 0.021527 | 0.045729 | 1.084173 | 2.737059 | 6.261582 | 15.62489 | 21.39111 | 8.039836 |
| 6925  | LOC103235 | 31.6053  | 2.157825 | 0.573134 | 3.764961 | 0.000167 | 0.000639 | 4.878777 | 10.40082 | 19.48048 | 49.10679 | 70.59065 | 35.17428 |
| 6963  | GRAP2     | 31.18595 | 2.15779  | 0.575275 | 3.750882 | 0.000176 | 0.000673 | 8.673382 | 9.853413 | 15.30609 | 64.73168 | 68.45154 | 20.09959 |
| 5375  | ZNF835    | 30.02992 | 2.15707  | 0.48177  | 4.477387 | 7.56E-06 | 3.74E-05 | 13.55216 | 9.853413 | 9.740239 | 49.10679 | 40.6431  | 57.28383 |
| 15282 | SLC38A4   | 6.540855 | 2.156574 | 1.209591 | 1.782895 | 0.074603 | 0.129782 | 0.542086 | 4.379295 | 2.087194 | 6.696381 | 23.53022 | 2.009959 |
| 18567 | LOC119625 | 3.041835 | 2.156331 | 1.738522 | 1.240324 | 0.214856 | 0.307622 | 0        | 0        | 3.478657 | 4.464254 | 4.278221 | 6.029877 |
| 18953 | LOC119618 | 2.166231 | 2.155636 | 1.805233 | 1.194104 | 0.232437 | 0.326035 | 0        | 1.642235 | 0.695731 | 2.232127 | 6.417332 | 2.009959 |
| 1344  | LARGE1    | 195.5581 | 2.155595 | 0.221499 | 9.731863 | 2.21E-22 | 4.36E-21 | 66.13454 | 60.2153  | 89.74935 | 301.3371 | 327.2839 | 328.6283 |
| 16042 | GDPD4     | 5.733333 | 2.155376 | 1.300057 | 1.657908 | 0.097336 | 0.161306 | 0        | 2.189647 | 4.174388 | 17.85702 | 2.139111 | 8.039836 |
| 11555 | LOC103220 | 9.355293 | 2.154891 | 0.860695 | 2.503665 | 0.012291 | 0.028277 | 3.252518 | 2.737059 | 4.174388 | 13.39276 | 23.53022 | 9.044815 |
| 1799  | LOC103240 | 108.9272 | 2.1547   | 0.25481  | 8.456107 | 2.76E-17 | 4.09E-16 | 41.19856 | 41.05589 | 37.56949 | 178.5702 | 173.268  | 181.9013 |
| 21148 | TAAAR9    | 1.081701 | 2.154378 | 2.50996  | 0.858331 | 0.39071  | 0.491112 | 0        | 0.547412 | 0.695731 | 2.232127 | 0        | 3.014938 |
| 21149 | GRXCR1    | 1.081701 | 2.154378 | 2.50996  | 0.858331 | 0.39071  | 0.491112 | 0        | 0.547412 | 0.695731 | 2.232127 | 0        | 3.014938 |
| 15660 | LOC103221 | 4.072119 | 2.154179 | 1.250089 | 1.72322  | 0.084849 | 0.144042 | 2.168345 | 1.642235 | 0.695731 | 4.464254 | 6.417332 | 9.044815 |
| 424   | C1QTNF6   | 533.577  | 2.154155 | 0.140077 | 15.37842 | 2.28E-53 | 1.43E-51 | 191.3565 | 191.0467 | 206.6322 | 848.2083 | 823.5576 | 940.6608 |
| 6883  | LOC119621 | 39.93927 | 2.15406  | 0.569277 | 3.783851 | 0.000154 | 0.000596 | 7.589209 | 9.853413 | 26.43779 | 75.89232 | 87.70354 | 32.15934 |
| 10645 | LOC103234 | 11.48503 | 2.153495 | 0.79548  | 2.707164 | 0.006786 | 0.016948 | 4.878777 | 2.189647 | 5.565851 | 13.39276 | 27.80844 | 15.07469 |
| 6692  | LOC119621 | 23.00073 | 2.153018 | 0.557818 | 3.859715 | 0.000114 | 0.000451 | 6.505036 | 6.568942 | 12.52316 | 35.71403 | 38.50399 | 38.18922 |
| 17392 | MUCL1     | 3.521647 | 2.152186 | 1.504564 | 1.430439 | 0.152591 | 0.23236  | 1.084173 | 0        | 2.782925 | 6.696381 | 8.556443 | 2.009959 |
| 17000 | LOC119624 | 4.160564 | 2.151503 | 1.442019 | 1.492007 | 0.135697 | 0.212207 | 0        | 0.547412 | 4.174388 | 8.928508 | 4.278221 | 7.034856 |
| 16438 | LOC119625 | 5.468053 | 2.151492 | 1.359615 | 1.582427 | 0.113552 | 0.183646 | 0        | 0.547412 | 5.565851 | 6.696381 | 14.97377 | 5.024897 |
| 18542 | SPRN      | 3.761884 | 2.149494 | 1.727636 | 1.244182 | 0.213433 | 0.306011 | 0        | 0        | 4.174388 | 6.696381 | 10.69555 | 1.004979 |
| 6702  | LOC119625 | 24.21767 | 2.149292 | 0.55768  | 3.853989 | 0.000116 | 0.000461 | 8.131296 | 8.211177 | 10.43597 | 55.80317 | 23.53022 | 39.1942  |
| 8811  | WNT9B     | 28.43969 | 2.149222 | 0.677596 | 3.171835 | 0.001515 | 0.004571 | 8.131296 | 7.663765 | 15.30609 | 33.4819  | 91.98176 | 14.06971 |
| 178   | CD24      | 20266.84 | 2.148751 | 0.102775 | 20.90733 | 4.59E-97 | 6.86E-95 | 6944.668 | 8494.189 | 6935.746 | 33225.21 | 33310.23 | 32690.98 |
| 6576  | ARPP21    | 45.76823 | 2.148185 | 0.549389 | 3.910131 | 9.22E-05 | 0.000373 | 5.96295  | 18.612   | 25.74206 | 102.6778 | 83.42532 | 38.18922 |
| 14117 | LOC119626 | 6.093468 | 2.147702 | 1.078802 | 1.990822 | 0.046501 | 0.08757  | 0.542086 | 2.737059 | 3.478657 | 8.928508 | 12.83466 | 8.039836 |
| 1482  | LOC103221 | 171.9255 | 2.147672 | 0.230933 | 9.299982 | 1.40E-20 | 2.52E-19 | 71.5554  | 49.81448 | 68.87741 | 301.3371 | 254.5542 | 285.4142 |
| 16339 | LOC119615 | 4.399252 | 2.147639 | 1.343936 | 1.598022 | 0.110038 | 0.179042 | 2.710432 | 0        | 2.087194 | 11.16063 | 6.417332 | 4.019918 |
| 7797  | LOC103215 | 38.02275 | 2.147284 | 0.619496 | 3.46618  | 0.000528 | 0.0018   | 4.878777 | 8.758589 | 28.52499 | 55.80317 | 91.98176 | 38.18922 |
| 20300 | LOC103241 | 1.487457 | 2.14695  | 2.194603 | 0.978286 | 0.327933 | 0.42947  | 1.084173 | 0.547412 | 0        | 0        | 4.278221 | 3.014938 |
| 18583 | TPSG1     | 3.06336  | 2.146404 | 1.734572 | 1.237426 | 0.215929 | 0.30891  | 0        | 0        | 3.478657 | 4.464254 | 6.417332 | 4.019918 |
| 20115 | LOC119625 | 1.727694 | 2.144789 | 2.123194 | 1.010171 | 0.312414 | 0.412901 | 0        | 0.547412 | 1.391463 | 0        | 6.417332 | 2.009959 |
| 15045 | UPK3A     | 5.862082 | 2.14282  | 1.174009 | 1.825216 | 0.067968 | 0.120103 | 1.626259 | 3.284471 | 1.391463 | 4.464254 | 21.39111 | 3.014938 |
| 18797 | LOC119615 | 3.100388 | 2.142362 | 1.758343 | 1.218398 | 0.223073 | 0.315497 | 0        | 0        | 3.478657 | 6.696381 | 6.417332 | 2.009959 |
| 12238 | DCST2     | 8.261119 | 2.142115 | 0.908029 | 2.359083 | 0.01832  | 0.039797 | 1.626259 | 2.737059 | 4.87012  | 11.16063 | 17.11289 | 12.05975 |
| 11562 | LOC119624 | 10.80477 | 2.142002 | 0.855947 | 2.502493 | 0.012332 | 0.028356 | 2.710432 | 5.474118 | 3.478657 | 29.01765 | 17.11289 | 7.034856 |
| 12520 | PCP4L1    | 9.656391 | 2.141771 | 0.932191 | 2.297566 | 0.021587 | 0.045837 | 2.710432 | 1.642235 | 6.261582 | 15.62489 | 25.66933 | 6.029877 |
| 1256  | TRPC7     | 181.6264 | 2.141567 | 0.214378 | 9.989672 | 1.69E-23 | 3.58E-22 | 57.46116 | 67.87906 | 76.53045 | 281.248  | 310.171  | 296.4689 |
| 1548  | LOC103221 | 137.7768 | 2.141526 | 0.235568 | 9.090909 | 9.82E-20 | 1.69E-18 | 51.49821 | 49.81448 | 50.78839 | 252.2303 | 220.3284 | 202.0009 |
| 20959 | CA6       | 1.489233 | 2.141497 | 2.422069 | 0.88416  | 0.37661  | 0.477703 | 0        | 1.642235 | 0        | 0        | 4.278221 | 3.014938 |
| 358   | C1R       | 834.1107 | 2.141397 | 0.131575 | 16.27505 | 1.48E-59 | 1.10E-57 | 284.5953 | 320.7833 | 321.4279 | 1359.365 | 1232.128 | 1486.365 |
| 10345 | LOC119621 | 13.17651 | 2.139645 | 0.770292 | 2.777705 | 0.005474 | 0.014068 | 2.168345 | 6.02153  | 6.261582 | 29.01765 | 23.53022 | 12.05975 |
| 15341 | GRXCR2    | 5.216977 | 2.138627 | 1.206588 | 1.772458 | 0.076318 | 0.132255 | 1.084173 | 3.831883 | 0.695731 | 6.696381 | 14.97377 | 4.019918 |
| 833   | JAG2      | 326.0075 | 2.138114 | 0.18025  | 11.86191 | 1.87E-32 | 5.96E-31 | 119.259  | 109.4824 | 134.9719 | 544.639  | 457.7697 | 589.9229 |
| 5796  |           |          |          |          |          |          |          |          |          |          |          |          |          |



|       |           |          |          |          |          |           |           |          |          |          |          |          |          |
|-------|-----------|----------|----------|----------|----------|-----------|-----------|----------|----------|----------|----------|----------|----------|
| 1784  | ATG9B     | 171.2851 | 2.136628 | 0.251454 | 8.497081 | 1.94E-17  | 2.90E-16  | 60.17159 | 48.17224 | 82.79203 | 247.7661 | 314.4493 | 274.3594 |
| 8972  | AQP3      | 17.14236 | 2.136571 | 0.683692 | 3.125051 | 0.001778  | 0.005268  | 5.420864 | 4.379295 | 9.044508 | 35.71403 | 34.22577 | 14.06971 |
| 1434  | KCNH3     | 198.4357 | 2.136244 | 0.226552 | 9.429385 | 4.13E-21  | 7.65E-20  | 87.81799 | 55.28859 | 77.92191 | 325.8905 | 308.0319 | 335.6631 |
| 9878  | TMC8      | 17.71125 | 2.136208 | 0.739897 | 2.887171 | 0.003887  | 0.010461  | 2.710432 | 3.284471 | 13.91463 | 29.01765 | 34.22577 | 23.11453 |
| 15187 | LOC103225 | 7.293164 | 2.135256 | 1.187641 | 1.797898 | 0.072193  | 0.126367  | 0        | 3.831883 | 4.174388 | 15.62489 | 17.11289 | 3.014938 |
| 3505  | TLR1      | 53.59939 | 2.133634 | 0.364704 | 5.85032  | 4.91E-09  | 3.72E-08  | 21.68345 | 18.06459 | 19.48048 | 93.74933 | 96.25998 | 72.35852 |
| 17219 | HLNR      | 4.203615 | 2.133538 | 1.456591 | 1.464748 | 0.14299   | 0.220761  | 0        | 0.547412 | 4.174388 | 8.928508 | 8.556443 | 3.014938 |
| 12413 | KRT74     | 8.318784 | 2.13095  | 0.919355 | 2.317877 | 0.020456  | 0.043807  | 2.168345 | 2.189647 | 4.87012  | 13.39276 | 19.252   | 8.039836 |
| 1837  | ANKRD22   | 135.3748 | 2.129531 | 0.255002 | 8.351029 | 6.77E-17  | 9.79E-16  | 60.17159 | 38.31883 | 52.87558 | 220.9806 | 211.772  | 228.1303 |
| 238   | SEMA4B    | 2017.546 | 2.129201 | 0.113395 | 18.77683 | 1.17E-78  | 1.31E-76  | 809.3349 | 708.3509 | 736.7795 | 3156.228 | 3069.624 | 3624.961 |
| 15139 | LOC119615 | 4.7765   | 2.12857  | 1.177312 | 1.80799  | 0.070608  | 0.123992  | 0.542086 | 2.737059 | 2.087194 | 6.696381 | 8.556443 | 8.039836 |
| 19973 | CUNH17orf | 1.539988 | 2.127021 | 2.057285 | 1.033897 | 0.301184  | 0.40089   | 1.084173 | 0.547412 | 0        | 4.464254 | 2.139111 | 1.004979 |
| 4761  | SHD       | 77.1624  | 2.126749 | 0.439664 | 4.837214 | 1.32E-06  | 7.35E-06  | 27.6464  | 10.94824 | 48.00546 | 140.624  | 126.2075 | 109.5428 |
| 13287 | VSIG10L2  | 7.706104 | 2.126125 | 0.988511 | 2.150836 | 0.031489  | 0.063     | 2.710432 | 1.094824 | 4.87012  | 20.08914 | 6.417332 | 11.05477 |
| 11004 | ACKR3     | 13.20814 | 2.126099 | 0.808884 | 2.628434 | 0.008578  | 0.020724  | 1.626259 | 6.02153  | 6.957314 | 26.78552 | 27.80844 | 10.04979 |
| 19307 | TM4SF5    | 2.42339  | 2.126035 | 1.875468 | 1.133602 | 0.256961  | 0.353842  | 0        | 0        | 2.782925 | 4.464254 | 4.278221 | 3.014938 |
| 969   | DMTN      | 320.0982 | 2.124918 | 0.190773 | 11.13844 | 8.15E-29  | 2.24E-27  | 108.4173 | 147.2538 | 101.5768 | 506.6928 | 556.1688 | 500.4798 |
| 14294 | KLF14     | 8.180151 | 2.12338  | 1.082008 | 1.962444 | 0.049711  | 0.092456  | 3.252518 | 2.189647 | 3.478657 | 15.62489 | 23.53022 | 1.004979 |
| 11313 | FCGR3A    | 11.95157 | 2.122664 | 0.830762 | 2.555079 | 0.010616  | 0.024948  | 2.710432 | 4.379295 | 6.261582 | 8.928508 | 36.36488 | 13.06473 |
| 21249 | LOC119618 | 1.118729 | 2.121303 | 2.519564 | 0.841933 | 0.399826  | 0.500229  | 0        | 0.547412 | 0.695731 | 4.464254 | 0        | 1.004979 |
| 15253 | CDCP2     | 7.024168 | 2.120854 | 1.186609 | 1.788105 | 0.073759  | 0.128557  | 0.542086 | 1.094824 | 6.261582 | 6.696381 | 23.53022 | 4.019918 |
| 14829 | TRNAD-GU  | 5.509389 | 2.12085  | 1.136106 | 1.866772 | 0.061934  | 0.111033  | 2.168345 | 1.094824 | 2.782925 | 11.16063 | 12.83466 | 3.014938 |
| 466   | LOC103236 | 562.1104 | 2.119462 | 0.142044 | 14.92112 | 2.40E-50  | 1.37E-48  | 203.8245 | 237.1759 | 199.6749 | 837.0476 | 990.4082 | 914.5313 |
| 8178  | LOC103247 | 35.7218  | 2.118721 | 0.631808 | 3.353426 | 0.000798  | 0.002595  | 3.252518 | 9.306001 | 27.82925 | 60.26743 | 68.45154 | 45.22408 |
| 7721  | LOC119621 | 29.39356 | 2.118177 | 0.607621 | 3.486017 | 0.00049   | 0.001688  | 6.505036 | 14.23271 | 11.82743 | 42.41041 | 81.28621 | 20.09959 |
| 7739  | LOC119625 | 20.75675 | 2.117444 | 0.608261 | 3.481145 | 0.000499  | 0.001715  | 11.9259  | 5.474118 | 5.565851 | 37.94616 | 38.50399 | 25.12449 |
| 686   | TSNARE1   | 397.2532 | 2.116619 | 0.164249 | 12.88663 | 5.35E-38  | 2.07E-36  | 137.1479 | 137.4004 | 172.5414 | 689.7272 | 624.6203 | 622.0823 |
| 15059 | GPR34     | 5.732182 | 2.116543 | 1.160903 | 1.823187 | 0.068275  | 0.120532  | 0.542086 | 1.094824 | 4.87012  | 11.16063 | 10.69555 | 6.029877 |
| 3890  | DLGAP3    | 84.24791 | 2.116065 | 0.387916 | 5.454962 | 4.90E-08  | 3.35E-07  | 29.81475 | 24.63353 | 39.65669 | 133.9276 | 201.0764 | 76.37844 |
| 3975  | CFAP52    | 44.80132 | 2.115189 | 0.392209 | 5.393011 | 6.93E-08  | 4.63E-07  | 18.97302 | 15.32753 | 16.00182 | 64.73168 | 83.42532 | 70.34856 |
| 160   | DEPTOR    | 2202.059 | 2.114379 | 0.097743 | 21.63212 | 8.96E-104 | 1.49E-101 | 823.4292 | 863.8158 | 792.438  | 3448.636 | 3544.506 | 3739.529 |
| 1002  | RHO       | 240.1347 | 2.112847 | 0.192432 | 10.97973 | 4.78E-28  | 1.27E-26  | 76.43418 | 95.24966 | 99.48959 | 397.3186 | 374.3444 | 397.9719 |
| 148   | SLC1A1    | 2489.724 | 2.112841 | 0.09505  | 22.22872 | 1.81E-109 | 3.26E-107 | 944.8565 | 941.5483 | 920.4526 | 3861.58  | 3993.72  | 4276.188 |
| 776   | SLC22A18  | 1205.62  | 2.112392 | 0.172003 | 12.28111 | 1.14E-34  | 3.92E-33  | 531.7867 | 340.4901 | 488.4034 | 1899.54  | 1711.289 | 2262.209 |
| 2264  | LZTS1     | 89.57984 | 2.111599 | 0.282429 | 7.47657  | 7.63E-14  | 8.96E-13  | 33.60935 | 31.74989 | 36.17803 | 131.6955 | 145.4595 | 158.7868 |
| 529   | SGK2      | 901.4452 | 2.111514 | 0.148037 | 14.26347 | 3.70E-46  | 1.86E-44  | 401.1439 | 289.0334 | 326.9937 | 1455.347 | 1358.335 | 1577.818 |
| 16332 | CCDC83    | 4.478278 | 2.111016 | 1.319858 | 1.599426 | 0.109726  | 0.17861   | 1.626259 | 0.547412 | 2.782925 | 15.62489 | 4.278221 | 2.009959 |
| 447   | PDE1B     | 646.5758 | 2.110089 | 0.139419 | 15.13487 | 9.54E-52  | 5.67E-50  | 252.0702 | 226.0811 | 253.2462 | 1058.028 | 943.3478 | 1146.682 |
| 9004  | ADPRHL1   | 16.33176 | 2.109978 | 0.677403 | 3.114804 | 0.001841  | 0.005435  | 4.878777 | 7.116354 | 6.261582 | 17.85702 | 42.78221 | 19.09461 |
| 16906 | LOC103230 | 7.328723 | 2.109165 | 1.401361 | 1.505083 | 0.132303  | 0.208048  | 0        | 0        | 8.348776 | 15.62489 | 14.79377 | 5.024897 |
| 19558 | TTPA      | 2.444915 | 2.109025 | 1.935817 | 1.089475 | 0.275944  | 0.375025  | 0        | 0        | 2.782925 | 4.464254 | 6.417332 | 1.004979 |
| 4107  | LRR4C8    | 80.88177 | 2.108845 | 0.398566 | 5.291074 | 1.22E-07  | 7.87E-07  | 19.51511 | 20.80165 | 51.48412 | 122.767  | 156.1551 | 114.5677 |
| 16354 | CLRN3     | 4.684375 | 2.107398 | 1.320762 | 1.595593 | 0.11058   | 0.179758  | 1.626259 | 2.737059 | 0.695731 | 15.62489 | 6.417332 | 1.004979 |
| 2609  | CYTH4     | 78.51867 | 2.106884 | 0.302555 | 6.963645 | 3.32E-12  | 3.38E-11  | 27.10432 | 29.56024 | 32.69937 | 113.8385 | 126.2075 | 141.7021 |
| 17721 | LOC119626 | 2.627712 | 2.105663 | 1.524565 | 1.381156 | 0.167231  | 0.250879  | 1.084173 | 1.094824 | 0.695731 | 4.464254 | 6.417332 | 2.009959 |
| 5662  | CNGB1     | 31.64473 | 2.105631 | 0.485044 | 4.341117 | 1.42E-05  | 6.66E-05  | 13.01007 | 9.853413 | 12.52316 | 66.96381 | 51.33866 | 36.17926 |
| 13560 | LOC119628 | 8.387442 | 2.105559 | 1.004013 | 2.097142 | 0.035981  | 0.070542  | 1.626259 | 2.189647 | 5.565851 | 13.39276 | 23.53022 | 4.019918 |
| 1393  | NR3C2     | 290.807  | 2.105208 | 0.220396 | 9.551921 | 1.27E-21  | 2.43E-20  | 104.0806 | 143.4219 | 81.40057 | 439.729  | 455.6306 | 520.5794 |
| 1615  | GCNT4     | 182.2061 | 2.105179 | 0.235509 | 8.938839 | 3.93E-19  | 6.47E-18  | 55.29281 | 62.40495 | 89.05362 | 301.3371 | 303.7537 | 281.3943 |
| 10667 | KIAA2012  | 13.16292 | 2.105065 | 0.779689 | 2.699878 | 0.006936  | 0.017288  | 7.589209 | 2.189647 | 4.87012  | 22.32127 | 29.94755 | 12.05975 |
| 12504 | VWDE      | 10.52586 | 2.104108 | 0.914662 | 2.300422 | 0.021424  | 0.045545  | 1.626259 | 3.284471 | 6.957314 | 11.16063 | 32.08666 | 8.039836 |
| 10012 | LOC119628 | 18.7986  | 2.103995 | 0.736139 | 2.858148 | 0.004261  | 0.011315  | 3.252518 | 6.02153  | 11.82743 | 35.71403 | 44.92132 | 11.05477 |
| 9440  | NECTIN4   | 22.78847 | 2.103665 | 0.701456 | 2.998997 | 0.002709  | 0.007628  | 3.252518 | 7.116354 | 15.30609 | 44.64254 | 51.33866 | 15.07469 |
| 11086 | LRR7C1    | 13.6687  | 2.103287 | 0.806365 | 2.608357 | 0.009098  | 0.021815  | 5.96295  | 4.926706 | 4.174388 | 24.5534  | 36.36488 | 6.029877 |
| 18358 | LOC103235 | 2.205566 | 2.102883 | 1.653115 | 1.272073 | 0.203347  | 0.294476  | 0.542086 | 0.547412 | 1.391463 | 4.464254 | 4.278221 | 2.009959 |
| 18913 | LOC119623 | 2.206453 | 2.102785 | 1.750148 | 1.20149  | 0.229561  | 0.322682  | 0        | 1.094824 | 1.391463 | 4.464254 | 4.278221 | 2.009959 |
| 20869 | EFCAB1    | 1.103227 | 2.100822 | 2.345997 | 0.895492 | 0.370524  | 0.471942  | 0        | 0.547412 | 0.695731 | 2.232127 | 2.139111 | 1.004979 |
| 20870 | LOC103217 | 1.103227 | 2.100822 | 2.345997 | 0.895492 | 0.370524  | 0.471942  | 0        | 0.547412 | 0.695731 | 2.232127 | 2.139111 | 1.004979 |
| 20871 | LOC119627 | 1.103227 | 2.100822 | 2.345997 | 0.895492 | 0.370524  | 0.471942  | 0        | 0.547412 | 0.695731 | 2.232127 | 2.139111 | 1.004979 |
| 20872 | LOC103225 | 1.103227 | 2.100822 | 2.345997 | 0.895492 | 0.370524  | 0.471942  | 0        | 0.547412 | 0.695731 | 2.232127 | 2.139111 | 1.004979 |
| 11203 | LOC103248 | 17.24517 | 2.100609 | 0.81358  | 2.581935 | 0.009825  | 0.023313  | 2.710432 | 13.13788 | 3.478657 | 51.33892 | 10.69555 | 22.10955 |
| 11478 | LOC119615 | 9.653195 | 2.100505 | 0.833133 | 2.521214 | 0.011695  | 0.027088  | 2.168345 | 3.284471 | 5.565851 | 17.85702 | 14.97377 | 14.06971 |
| 329   | LOC119623 | 1070.693 | 2.100317 | 0.125292 | 16.76343 | 4.52E-63  | 3.65E-61  | 382.713  | 447.2355 | 386.1309 | 1707.577 | 1617.168 | 1883.332 |
| 7599  | ABCC11    | 24.52485 | 2.100011 | 0.595496 | 3.52649  | 0.000421  | 0.001473  | 9.757555 | 6.02153  | 11.82743 | 31.24978 | 64.17332 | 24.11951 |
| 6119  | DGKI      | 62.75581 | 2.099916 | 0.510834 | 4.110763 | 3.94E-05  | 0.000171  | 11.38381 | 18.612   | 41.04815 | 116.0706 | 141.1813 | 48.23901 |
| 16156 | DEUP1     | 4.788545 | 2.099605 | 1.283547 | 1.635784 | 0.101885  | 0.167653  | 0.542086 | 2.737059 | 2.087194 | 2.232127 | 17.11289 | 4.019918 |
| 19735 | LOC119628 | 2.294412 | 2.099522 | 1.97519  | 1.062947 | 0.287806  | 0.387703  | 0        | 0        | 2.782925 | 2.232127 | 8.556443 | 1.004979 |
| 16985 | LOC103235 | 7.223661 | 2.097583 | 1.403083 | 1.494981 | 0.134919  | 0.211195  | 0        | 0        | 8.348776 | 6.696381 | 19.252   | 9.044815 |
| 17054 | LOC119628 | 3.698881 | 2.096822 | 1.41048  | 1.486602 | 0.13712   | 0.213753  | 0        | 2.189647 | 2.087194 | 4.464254 | 6.417332 | 7.034856 |
| 16189 | LOC103217 | 5.78702  | 2.096639 | 1.287532 | 1.628417 | 0.103437  | 0.16986   | 1.084173 | 0        | 5.565851 | 15.62    |          |          |



|       |           |          |          |          |          |           |           |          |          |          |          |          |          |
|-------|-----------|----------|----------|----------|----------|-----------|-----------|----------|----------|----------|----------|----------|----------|
| 16816 | LOC103235 | 3.752464 | 2.095104 | 1.375811 | 1.522814 | 0.127805  | 0.202052  | 1.084173 | 1.642235 | 1.391463 | 6.696381 | 10.69555 | 1.004979 |
| 4493  | LOC119625 | 76.88477 | 2.095017 | 0.417789 | 5.014538 | 5.32E-07  | 3.15E-06  | 29.27266 | 12.59047 | 45.91827 | 120.5349 | 145.4595 | 107.5328 |
| 18519 | LOC119625 | 2.190063 | 2.094969 | 1.678306 | 1.248264 | 0.211934  | 0.304243  | 0.542086 | 0.547412 | 1.391463 | 2.232127 | 6.417332 | 2.009959 |
| 10954 | SH2D3A    | 12.07193 | 2.094279 | 0.793686 | 2.638676 | 0.008323  | 0.0202    | 3.794605 | 5.474118 | 4.174388 | 17.85702 | 32.08666 | 9.044815 |
| 14556 | RASL11B   | 6.829705 | 2.094245 | 1.093663 | 1.91489  | 0.055507  | 0.101377  | 1.084173 | 4.379295 | 2.087194 | 11.16063 | 19.252   | 3.014938 |
| 13257 | UCN3      | 7.417677 | 2.094174 | 0.970989 | 2.156744 | 0.031026  | 0.062217  | 2.710432 | 2.189647 | 3.478657 | 6.696381 | 21.39111 | 8.039836 |
| 17124 | GDF5      | 6.636222 | 2.094143 | 1.417378 | 1.477477 | 0.139548  | 0.216648  | 0        | 0        | 7.653045 | 11.16063 | 14.97377 | 6.029877 |
| 13362 | RFX6      | 7.931157 | 2.093425 | 0.980694 | 2.134636 | 0.032791  | 0.06524   | 2.168345 | 3.831883 | 2.782925 | 13.39276 | 21.39111 | 4.019918 |
| 15854 | LOC103245 | 4.139889 | 2.092712 | 1.237932 | 1.69049  | 0.090934  | 0.152484  | 2.168345 | 1.094824 | 1.391463 | 4.464254 | 10.69555 | 5.024897 |
| 10014 | KCNQ4     | 14.56767 | 2.092487 | 0.732243 | 2.857642 | 0.004268  | 0.011331  | 5.96295  | 6.02153  | 4.174388 | 31.24978 | 29.94755 | 10.04979 |
| 18355 | LOC103245 | 2.578376 | 2.092194 | 1.644006 | 1.27262  | 0.203153  | 0.294243  | 1.084173 | 0.547412 | 1.391463 | 0        | 6.417332 | 6.029877 |
| 222   | HSPB8     | 1517.945 | 2.09215  | 0.107922 | 19.38569 | 1.02E-83  | 1.22E-81  | 560.5173 | 597.2263 | 574.6741 | 2339.269 | 2380.83  | 2655.156 |
| 11150 | DSC3      | 13.66172 | 2.09168  | 0.806862 | 2.592363 | 0.009532  | 0.022727  | 2.710432 | 7.663765 | 4.87012  | 22.32127 | 36.36488 | 8.039836 |
| 16345 | LOC119625 | 4.357774 | 2.091587 | 1.310073 | 1.596542 | 0.110368  | 0.179512  | 2.710432 | 2.189647 | 0        | 8.928508 | 4.278221 | 8.039836 |
| 17037 | TNFRSF11E | 3.053941 | 2.090878 | 1.405545 | 1.487593 | 0.136858  | 0.213557  | 1.084173 | 1.642235 | 0.695731 | 4.464254 | 6.417332 | 4.019918 |
| 491   | CRACDL    | 612.2539 | 2.090811 | 0.142095 | 14.71419 | 5.23E-49  | 2.83E-47  | 239.0601 | 253.4517 | 205.9365 | 997.7608 | 924.0958 | 1053.218 |
| 14953 | UNC13C    | 6.628743 | 2.089382 | 1.132628 | 1.844721 | 0.065078  | 0.115703  | 1.626259 | 1.642235 | 4.174388 | 8.928508 | 21.39111 | 2.009959 |
| 12580 | LOC103218 | 11.83178 | 2.089344 | 0.913189 | 2.287964 | 0.02214   | 0.046787  | 1.084173 | 2.189647 | 10.43597 | 13.39276 | 27.80844 | 16.07967 |
| 17737 | LOC103218 | 5.925653 | 2.089341 | 1.516022 | 1.378173 | 0.16815   | 0.252037  | 0        | 0        | 6.957314 | 13.39276 | 2.139111 | 13.06473 |
| 16365 | LOC103245 | 3.717743 | 2.087926 | 1.309316 | 1.594669 | 0.110786  | 0.179973  | 1.626259 | 0.547412 | 2.087194 | 4.464254 | 8.556443 | 5.024897 |
| 20420 | DEFB123   | 1.543183 | 2.086419 | 2.17693  | 0.958423 | 0.33785   | 0.439828  | 1.084173 | 0        | 0.695731 | 4.464254 | 0        | 3.014938 |
| 6467  | LOC119625 | 24.11905 | 2.086197 | 0.527831 | 3.952398 | 7.74E-05  | 0.000318  | 9.215468 | 10.40082 | 7.653045 | 44.64254 | 40.6431  | 32.15934 |
| 18116 | HHLA2     | 3.315703 | 2.085997 | 1.582547 | 1.318127 | 0.187461  | 0.275082  | 0        | 1.642235 | 2.087194 | 4.464254 | 10.69555 | 1.004979 |
| 21365 | CUNH3orf5 | 1.087724 | 2.085445 | 2.538073 | 0.821665 | 0.411268  | 0.511715  | 0        | 0.547412 | 0.695731 | 0        | 4.278221 | 1.004979 |
| 21367 | LOC119615 | 1.087724 | 2.085445 | 2.538073 | 0.821665 | 0.411268  | 0.511715  | 0        | 0.547412 | 0.695731 | 0        | 4.278221 | 1.004979 |
| 21368 | LOC103235 | 1.087724 | 2.085445 | 2.538073 | 0.821665 | 0.411268  | 0.511715  | 0        | 0.547412 | 0.695731 | 0        | 4.278221 | 1.004979 |
| 10875 | LOC103215 | 12.30921 | 2.084164 | 0.785019 | 2.654921 | 0.007933  | 0.01939   | 7.589209 | 2.737059 | 3.478657 | 22.32127 | 25.66933 | 12.05975 |
| 20749 | LOC119625 | 1.954961 | 2.083939 | 2.288418 | 0.910646 | 0.362482  | 0.464436  | 2.168345 | 0        | 0        | 0        | 8.556443 | 1.004979 |
| 12383 | LOC103235 | 13.09136 | 2.083047 | 0.895551 | 2.325994 | 0.020019  | 0.042978  | 3.794605 | 5.474118 | 5.565851 | 4.464254 | 49.19955 | 10.04979 |
| 293   | LTBP3     | 1597.578 | 2.082741 | 0.11827  | 17.61004 | 2.06E-69  | 1.87E-67  | 594.6687 | 594.4892 | 644.943  | 2482.125 | 2365.856 | 2903.386 |
| 248   | CASTOR2   | 1285.914 | 2.081826 | 0.112296 | 18.53875 | 1.01E-76  | 1.08E-74  | 497.6353 | 478.9853 | 499.5351 | 2109.36  | 1905.948 | 2224.02  |
| 10305 | LOC119625 | 14.83227 | 2.080883 | 0.74654  | 2.787368 | 0.005314  | 0.013709  | 7.047123 | 2.737059 | 6.957314 | 31.24978 | 29.94755 | 11.05477 |
| 16549 | GPR88     | 4.622199 | 2.080716 | 1.328778 | 1.565888 | 0.117375  | 0.188555  | 0        | 3.831883 | 1.391463 | 8.928508 | 8.556443 | 5.024897 |
| 5178  | SP7       | 44.08987 | 2.080524 | 0.453196 | 4.590779 | 4.42E-06  | 2.27E-05  | 13.01007 | 16.42235 | 20.87194 | 58.0353  | 106.9555 | 49.24399 |
| 14095 | LOC103235 | 9.200301 | 2.08052  | 1.042921 | 1.994896 | 0.046054  | 0.086864  | 1.084173 | 3.831883 | 5.565851 | 4.464254 | 34.22577 | 6.029877 |
| 11388 | ASIC4     | 18.68217 | 2.080195 | 0.819079 | 2.539675 | 0.011096  | 0.025902  | 3.252518 | 2.189647 | 16.00182 | 37.94616 | 40.6431  | 12.05975 |
| 8272  | SELENBP1  | 17.13393 | 2.078435 | 0.625682 | 3.321871 | 0.000894  | 0.002874  | 5.420864 | 6.02153  | 8.348776 | 33.4819  | 21.39111 | 28.13943 |
| 7997  | RIPPLY3   | 20.63726 | 2.078203 | 0.608863 | 3.413253 | 0.000642  | 0.002134  | 8.131296 | 10.94824 | 4.174388 | 37.94616 | 38.50399 | 24.11951 |
| 14863 | TMEM215   | 5.914716 | 2.077921 | 1.116982 | 1.8603   | 0.062843  | 0.112406  | 1.626259 | 1.642235 | 3.478657 | 4.464254 | 19.252   | 5.024897 |
| 18541 | LOC119625 | 2.685213 | 2.077817 | 1.670004 | 1.244199 | 0.213426  | 0.306011  | 0        | 1.642235 | 1.391463 | 8.928508 | 21.39111 | 2.009959 |
| 19548 | LOC119625 | 1.528568 | 2.077646 | 1.904382 | 1.090982 | 0.275281  | 0.374377  | 0.542086 | 0.547412 | 0.695731 | 2.232127 | 2.139111 | 3.014938 |
| 1078  | LYNX1     | 293.1078 | 2.077413 | 0.195642 | 10.61843 | 2.45E-26  | 6.03E-25  | 98.11763 | 140.1374 | 98.09812 | 466.5145 | 483.439  | 472.3404 |
| 16713 | OPRM1     | 4.882186 | 2.077198 | 1.349149 | 1.539636 | 0.123649  | 0.196683  | 0        | 2.737059 | 2.782925 | 8.928508 | 12.83466 | 2.009959 |
| 8555  | LOC119625 | 15.72244 | 2.07678  | 0.641065 | 3.239577 | 0.001197  | 0.00372   | 6.505036 | 5.474118 | 6.261582 | 24.5534  | 21.39111 | 30.14938 |
| 5659  | LOC119625 | 66.09883 | 2.07641  | 0.478165 | 4.342453 | 1.41E-05  | 6.62E-05  | 24.93597 | 9.306001 | 41.74388 | 129.4634 | 119.7902 | 71.35354 |
| 20282 | SERPINB11 | 1.767917 | 2.075938 | 2.114807 | 0.981621 | 0.326287  | 0.427686  | 0        | 0        | 2.087194 | 2.232127 | 4.278221 | 2.009959 |
| 14469 | PI15      | 6.661002 | 2.075418 | 1.075111 | 1.930422 | 0.053555  | 0.0984    | 1.084173 | 1.094824 | 5.565851 | 15.62489 | 8.556443 | 8.039836 |
| 13226 | CFAP77    | 6.995591 | 2.07527  | 0.959073 | 2.163829 | 0.030478  | 0.061261  | 3.252518 | 3.284471 | 1.391463 | 11.16063 | 12.83466 | 10.04979 |
| 16008 | NRSN2     | 4.878636 | 2.075211 | 1.247892 | 1.662974 | 0.096318  | 0.159958  | 2.168345 | 0.547412 | 2.782925 | 8.928508 | 12.83466 | 2.009959 |
| 744   | DPF3      | 368.5374 | 2.075077 | 0.165792 | 12.51613 | 6.09E-36  | 2.18E-34  | 139.8583 | 157.1072 | 127.3188 | 611.6028 | 541.195  | 634.142  |
| 18058 | PI16      | 2.684325 | 2.073987 | 1.556184 | 1.332739 | 0.182618  | 0.26885   | 0.542086 | 1.094824 | 1.391463 | 8.928508 | 2.139111 | 2.009959 |
| 152   | LOC103225 | 5804.261 | 2.073897 | 0.094517 | 21.94203 | 1.03E-106 | 1.81E-104 | 2271.884 | 2242.199 | 2172.073 | 9426.272 | 8629.172 | 10083.96 |
| 16043 | LOC103235 | 4.638399 | 2.071296 | 1.24944  | 1.657779 | 0.097362  | 0.16134   | 3.252518 | 0.547412 | 1.391463 | 8.928508 | 10.69555 | 3.014938 |
| 1081  | FA2H      | 207.1006 | 2.070244 | 0.195462 | 10.59153 | 3.26E-26  | 8.02E-25  | 85.64965 | 72.25836 | 81.40057 | 325.8905 | 333.7013 | 343.703  |
| 14924 | LOC103245 | 5.504939 | 2.069741 | 1.118875 | 1.849841 | 0.064336  | 0.114606  | 2.168345 | 3.284471 | 0.695731 | 11.16063 | 10.69555 | 5.024897 |
| 13942 | LOC103218 | 6.38976  | 2.069728 | 1.022138 | 2.024902 | 0.042877  | 0.08176   | 2.168345 | 1.094824 | 4.174388 | 11.16063 | 10.69555 | 9.044815 |
| 2782  | TNFRSF18  | 178.1066 | 2.069518 | 0.307624 | 6.727425 | 1.73E-11  | 1.65E-10  | 80.77087 | 38.86624 | 86.96642 | 314.7299 | 209.6328 | 337.6731 |
| 12844 | LOC103225 | 11.15718 | 2.069353 | 0.92804  | 2.229811 | 0.02576   | 0.053319  | 1.084173 | 2.737059 | 9.044508 | 26.78552 | 19.252   | 8.039836 |
| 1211  | LOC103225 | 454.9983 | 2.069266 | 0.204489 | 10.1192  | 4.54E-24  | 9.97E-23  | 166.9626 | 127.547  | 231.6785 | 725.4413 | 782.9145 | 695.4458 |
| 21660 | FGFBP1    | 1.687838 | 2.068643 | 2.643392 | 0.782571 | 0.433879  | 0.532533  | 0        | 0        | 2.087194 | 0        | 0        | 8.039836 |
| 14150 | LOC103245 | 8.236336 | 2.068333 | 1.041819 | 1.985309 | 0.04711   | 0.08851   | 1.084173 | 2.737059 | 5.565851 | 15.62489 | 21.39111 | 3.014938 |
| 13832 | PALMD     | 7.512737 | 2.068309 | 1.012069 | 2.043645 | 0.040989  | 0.07878   | 3.252518 | 0.547412 | 4.87012  | 13.39276 | 14.97377 | 8.039836 |
| 7378  | MUSK      | 23.98241 | 2.067989 | 0.57316  | 3.608047 | 0.000309  | 0.001112  | 9.757555 | 7.663765 | 10.43597 | 53.57105 | 19.252   | 43.21412 |
| 17284 | HAO1      | 5.887571 | 2.067057 | 1.422827 | 1.452781 | 0.146284  | 0.225004  | 0        | 0.547412 | 6.261582 | 20.08914 | 6.417332 | 2.009959 |
| 7226  | LOC103245 | 25.98457 | 2.066551 | 0.564749 | 3.659241 | 0.000253  | 0.000931  | 5.420864 | 8.211177 | 16.69755 | 46.87467 | 38.50399 | 40.19918 |
| 15291 | FPR2      | 5.32303  | 2.066055 | 1.160216 | 1.78075  | 0.074953  | 0.130314  | 0.542086 | 2.737059 | 2.782925 | 11.16063 | 10.69555 | 4.019918 |
| 14380 | DMC1      | 6.220385 | 2.065763 | 1.060391 | 1.948114 | 0.051401  | 0.095028  | 3.252518 | 1.642235 | 2.087194 | 15.62489 | 10.69555 | 4.019918 |
| 14013 | GPX2      | 6.376033 | 2.065059 | 1.027097 | 2.010579 | 0.04437   | 0.084177  | 1.084173 | 2.189647 | 4.174388 | 8.928508 | 12.83466 | 9.044815 |
| 3492  | LOC119625 | 156.3018 | 2.064996 | 0.352141 | 5.864119 | 4.52E-09  | 3.44E-08  | 35.23561 | 82.11177 | 62.61582 | 249.9982 | 355.0924 | 152.7569 |
| 20995 | LOC119625 | 1.804945 | 2.063548 | 2.347175 | 0.879162 | 0.379313  | 0.480307  | 0        | 0        | 2.087194 | 4.464254 | 4.278221 | 0        |
| 17820 | HOXD10    | 3.3344   | 2.063396 | 1.501857 | 1.373897 |           |           |          |          |          |          |          |          |



|       |           |          |          |          |          |          |          |          |          |          |          |          |          |
|-------|-----------|----------|----------|----------|----------|----------|----------|----------|----------|----------|----------|----------|----------|
| 19459 | SLC36A3   | 2.415745 | 2.060372 | 1.858532 | 1.108602 | 0.267602 | 0.3656   | 0        | 2.737059 | 0        | 4.464254 | 4.278221 | 3.014938 |
| 14771 | RGMA      | 8.174325 | 2.060261 | 1.096923 | 1.878219 | 0.060351 | 0.108621 | 1.084173 | 2.737059 | 5.565851 | 6.696381 | 29.94755 | 3.014938 |
| 12814 | NLRP6     | 12.30488 | 2.059892 | 0.921248 | 2.23598  | 0.025353 | 0.0526   | 2.168345 | 1.642235 | 10.43597 | 29.01765 | 23.53022 | 7.034856 |
| 19502 | LOC103241 | 1.972239 | 2.059658 | 1.87071  | 1.101003 | 0.270895 | 0.369299 | 1.084173 | 1.094824 | 0        | 2.232127 | 6.417332 | 1.004979 |
| 11266 | ALDH8A1   | 12.50163 | 2.059296 | 0.802471 | 2.566195 | 0.010282 | 0.024263 | 5.420864 | 2.737059 | 6.261582 | 11.16063 | 36.36488 | 13.06473 |
| 854   | NECTIN1   | 309.2995 | 2.059008 | 0.17511  | 11.7584  | 6.39E-32 | 1.99E-30 | 109.5014 | 125.3573 | 125.2316 | 524.5498 | 438.5177 | 532.6391 |
| 11530 | LOC103232 | 11.29578 | 2.05819  | 0.820738 | 2.507731 | 0.012151 | 0.028017 | 2.710432 | 2.737059 | 7.653045 | 20.08914 | 23.53022 | 11.05477 |
| 2171  | INSC      | 130.8756 | 2.056017 | 0.268441 | 7.6591   | 1.87E-14 | 2.29E-13 | 57.46116 | 41.6033  | 52.17985 | 249.9982 | 218.1893 | 165.8216 |
| 20978 | TAS2R10   | 1.752414 | 2.05564  | 2.331005 | 0.881869 | 0.377848 | 0.478839 | 0        | 0        | 2.087194 | 0        | 6.417332 | 2.009959 |
| 2968  | LOC119626 | 71.28406 | 2.055327 | 0.317789 | 6.467591 | 9.96E-11 | 8.92E-10 | 28.18849 | 27.37059 | 27.82925 | 93.74933 | 121.9293 | 128.6374 |
| 2077  | CELF5     | 127.7524 | 2.055053 | 0.262005 | 7.843574 | 4.38E-15 | 5.61E-14 | 40.65648 | 55.28859 | 52.17985 | 198.6593 | 243.8586 | 175.8714 |
| 20587 | LOC119627 | 1.513952 | 2.054455 | 2.187566 | 0.939151 | 0.347653 | 0.448942 | 0        | 1.094824 | 0.695731 | 0        | 4.278221 | 3.014938 |
| 14904 | LOC119627 | 6.328637 | 2.054252 | 1.108065 | 1.85391  | 0.063752 | 0.113718 | 1.626259 | 1.642235 | 4.174388 | 2.232127 | 19.252   | 9.044815 |
| 16715 | LOC119626 | 3.518617 | 2.053713 | 1.334014 | 1.539499 | 0.123683 | 0.196704 | 2.168345 | 0.547412 | 1.391463 | 6.696381 | 4.278221 | 6.029877 |
| 455   | LOC103221 | 767.8001 | 2.05306  | 0.136402 | 15.05154 | 3.37E-51 | 1.97E-49 | 303.0263 | 306.5506 | 286.6413 | 1241.063 | 1086.668 | 1382.852 |
| 19270 | CD74      | 2.246676 | 2.052546 | 1.79871  | 1.141121 | 0.25382  | 0.350135 | 0        | 0.547412 | 2.087194 | 6.696381 | 2.139111 | 2.009959 |
| 12055 | HAPLN2    | 15.62608 | 2.051224 | 0.856143 | 2.39589  | 0.01658  | 0.036564 | 2.710432 | 1.642235 | 13.91463 | 33.4819  | 29.94755 | 12.05975 |
| 21117 | PCDH8     | 1.789442 | 2.050918 | 2.379348 | 0.861966 | 0.388706 | 0.489334 | 0        | 0        | 2.087194 | 2.232127 | 6.417332 | 0        |
| 21118 | TMEM204   | 1.789442 | 2.050918 | 2.379348 | 0.861966 | 0.388706 | 0.489334 | 0        | 0        | 2.087194 | 2.232127 | 6.417332 | 0        |
| 12566 | NXPE2     | 9.052878 | 2.049628 | 0.894978 | 2.290144 | 0.022013 | 0.046571 | 3.252518 | 4.926706 | 2.087194 | 15.62489 | 21.39111 | 7.034856 |
| 6522  | PRAM1     | 31.46867 | 2.049561 | 0.521373 | 3.931085 | 8.46E-05 | 0.000345 | 7.589209 | 13.6853  | 15.30609 | 40.17829 | 74.86887 | 37.18424 |
| 10899 | SAG       | 12.91291 | 2.049282 | 0.773058 | 2.650879 | 0.008028 | 0.019581 | 3.252518 | 5.474118 | 6.261582 | 35.71403 | 10.69555 | 16.07967 |
| 15902 | SMIM24    | 5.585324 | 2.04879  | 1.216512 | 1.68415  | 0.092153 | 0.154064 | 1.084173 | 0.547412 | 4.87012  | 11.16063 | 12.83466 | 3.014938 |
| 1864  | CSF1R     | 129.0187 | 2.048698 | 0.247672 | 8.271805 | 1.32E-16 | 1.88E-15 | 42.82482 | 52.00412 | 56.35424 | 185.2665 | 224.6066 | 213.0556 |
| 10046 | LOC119615 | 12.57044 | 2.047944 | 0.718161 | 2.851649 | 0.004349 | 0.01151  | 4.336691 | 6.02153  | 4.174388 | 24.5534  | 19.252   | 17.08465 |
| 5146  | LOC119626 | 35.3434  | 2.047654 | 0.444566 | 4.605961 | 4.11E-06 | 2.12E-05 | 11.9259  | 16.96977 | 12.52316 | 60.26743 | 47.06043 | 63.31371 |
| 5182  | SRGAP3    | 44.83123 | 2.047221 | 0.446199 | 4.588131 | 4.47E-06 | 2.29E-05 | 14.09425 | 13.6853  | 24.3506  | 93.74933 | 74.86887 | 48.23901 |
| 8711  | LOC119614 | 16.79183 | 2.047221 | 0.639932 | 3.199122 | 0.001378 | 0.004207 | 7.589209 | 5.474118 | 6.261582 | 31.24978 | 32.08666 | 18.08963 |
| 12127 | CCDC144A  | 12.11108 | 2.046847 | 0.860208 | 2.37948  | 0.017337 | 0.038007 | 5.420864 | 4.926706 | 3.478657 | 11.16063 | 40.6431  | 7.034856 |
| 11105 | SORBS2    | 16.23898 | 2.045813 | 0.785662 | 2.603936 | 0.009216 | 0.022063 | 2.168345 | 8.211177 | 8.348776 | 29.01765 | 40.6431  | 9.044815 |
| 15480 | TMEM100   | 6.676658 | 2.045395 | 1.16994  | 1.74829  | 0.080414 | 0.138105 | 0        | 4.926706 | 2.782925 | 15.62489 | 10.69555 | 6.029877 |
| 7571  | ERIC6     | 26.68578 | 2.044175 | 0.578326 | 3.534644 | 0.000408 | 0.001434 | 7.047123 | 12.04306 | 11.82743 | 33.4819  | 70.59065 | 25.12449 |
| 268   | SLC9A3R1  | 4074.927 | 2.044098 | 0.113457 | 18.01657 | 1.44E-72 | 1.43E-70 | 1483.148 | 1826.166 | 1462.427 | 6497.722 | 6271.872 | 6908.229 |
| 3773  | LOC103230 | 67.47627 | 2.043921 | 0.366841 | 5.571686 | 2.52E-08 | 1.78E-07 | 16.80468 | 0.01283  | 33.39511 | 91.51721 | 132.6249 | 101.5029 |
| 19216 | LOC103246 | 2.231173 | 2.043722 | 1.775345 | 1.151169 | 0.249663 | 0.34538  | 0        | 0.547412 | 2.087194 | 4.464254 | 4.278221 | 2.009959 |
| 8404  | LOC119625 | 24.42501 | 2.043412 | 0.622262 | 3.281955 | 0.001031 | 0.003261 | 8.131296 | 3.831883 | 16.69755 | 49.10679 | 40.6431  | 28.13943 |
| 13561 | LOC103247 | 6.769541 | 2.04317  | 0.974315 | 2.097031 | 0.035991 | 0.070556 | 3.252518 | 3.284471 | 1.391463 | 8.928508 | 10.69555 | 13.06473 |
| 2048  | ADGRF5    | 104.3027 | 2.043129 | 0.259055 | 7.886856 | 3.10E-15 | 4.02E-14 | 39.03022 | 39.41365 | 43.83108 | 171.8738 | 166.8506 | 164.8166 |
| 14023 | LOC119628 | 7.280665 | 2.04284  | 1.017071 | 2.008553 | 0.044585 | 0.084524 | 3.252518 | 0.547412 | 4.87012  | 13.39276 | 8.556443 | 13.06473 |
| 17330 | SSTR4     | 5.19507  | 2.042763 | 1.414981 | 1.443667 | 0.148833 | 0.228316 | 0        | 0.547412 | 5.565851 | 15.62489 | 6.417332 | 3.014938 |
| 17171 | LOC103237 | 4.838872 | 2.04257  | 1.387867 | 1.471733 | 0.141093 | 0.21844  | 0        | 2.189647 | 3.478657 | 2.232127 | 17.11289 | 4.019918 |
| 4188  | LOC103235 | 55.53846 | 2.042221 | 0.390179 | 5.234063 | 1.66E-07 | 1.05E-06 | 14.63633 | 21.89647 | 28.52499 | 109.3742 | 83.42532 | 75.37346 |
| 2381  | TTYH1     | 118.7669 | 2.041987 | 0.279644 | 7.302087 | 2.83E-13 | 3.16E-12 | 42.82482 | 35.03436 | 61.92009 | 198.6593 | 188.2417 | 185.9212 |
| 6704  | ARHGAP45  | 48.60017 | 2.041978 | 0.529989 | 3.85287  | 0.000117 | 0.000463 | 22.22554 | 5.474118 | 29.22072 | 95.98146 | 83.42532 | 55.27387 |
| 14042 | NGFR      | 7.272593 | 2.041737 | 1.017645 | 2.006336 | 0.04482  | 0.084856 | 2.168345 | 2.737059 | 3.478657 | 6.696381 | 23.53022 | 5.024897 |
| 2849  | LPAR6     | 70.87373 | 2.041371 | 0.308561 | 6.615784 | 3.70E-11 | 3.45E-10 | 27.10432 | 26.82318 | 29.22072 | 118.3027 | 111.2338 | 112.5577 |
| 16211 | LOC119627 | 4.320318 | 2.041191 | 1.255614 | 1.625653 | 0.104024 | 0.170596 | 1.084173 | 2.737059 | 1.391463 | 2.232127 | 6.417332 | 12.05975 |
| 413   | CD82      | 2174.277 | 2.040907 | 0.131372 | 15.5353  | 2.00E-54 | 1.29E-52 | 923.7152 | 733.5318 | 896.102  | 3408.458 | 3125.241 | 3958.614 |
| 12232 | LOC119615 | 9.05341  | 2.040478 | 0.864538 | 2.360194 | 0.018265 | 0.039698 | 4.878777 | 2.737059 | 2.782925 | 15.62489 | 19.252   | 9.044815 |
| 12607 | DRD1      | 8.171558 | 2.039257 | 0.893879 | 2.281357 | 0.022527 | 0.047505 | 2.168345 | 3.831883 | 3.478657 | 13.39276 | 17.11289 | 9.044815 |
| 1169  | SOX13     | 243.8826 | 2.038231 | 0.198484 | 10.26901 | 9.72E-25 | 2.21E-23 | 84.56547 | 107.2927 | 95.3152  | 415.1756 | 335.8404 | 425.1063 |
| 8455  | ZBTB32    | 20.17681 | 2.037755 | 0.623741 | 3.266992 | 0.001087 | 0.003418 | 4.336691 | 11.49565 | 7.653045 | 44.64254 | 27.80844 | 25.12449 |
| 17483 | LOC119618 | 3.912064 | 2.035542 | 1.43894  | 1.414612 | 0.157182 | 0.239014 | 3.252518 | 0        | 1.391463 | 2.232127 | 8.556443 | 8.039836 |
| 17335 | LOC103227 | 3.082743 | 2.034236 | 1.410506 | 1.442203 | 0.149245 | 0.228883 | 0.542086 | 1.094824 | 2.087194 | 4.464254 | 4.278221 | 6.029877 |
| 17449 | CA9       | 3.116576 | 2.034034 | 1.433949 | 1.418484 | 0.15605  | 0.237754 | 0.542086 | 1.642235 | 1.391463 | 6.696381 | 6.417332 | 2.009959 |
| 8015  | ATP1A2    | 42.25978 | 2.033901 | 0.596819 | 3.47901  | 0.000655 | 0.002171 | 5.96295  | 9.306001 | 34.78657 | 60.26743 | 91.98176 | 51.25395 |
| 15879 | QPRT      | 4.649391 | 2.033255 | 1.204459 | 1.688107 | 0.091391 | 0.153009 | 2.168345 | 1.094824 | 2.087194 | 6.696381 | 12.83466 | 3.014938 |
| 16171 | FGL1      | 4.581192 | 2.032573 | 1.245241 | 1.632273 | 0.102622 | 0.16871  | 0.542086 | 2.189647 | 2.782925 | 2.232127 | 10.69555 | 9.044815 |
| 6387  | ZNF415    | 32.02945 | 2.032512 | 0.510253 | 3.983341 | 6.80E-05 | 0.000283 | 9.215468 | 14.78012 | 13.2189  | 69.19594 | 55.61688 | 30.14938 |
| 13009 | METTL21C  | 9.783564 | 2.032243 | 0.922708 | 2.202476 | 0.027632 | 0.056468 | 4.336691 | 2.737059 | 4.174388 | 15.62489 | 27.80844 | 4.019918 |
| 18925 | LOC103215 | 3.582305 | 2.031693 | 1.693727 | 1.19954  | 0.023018 | 0.323564 | 2.710432 | 0        | 1.391463 | 6.696381 | 10.69555 | 0        |
| 1836  | SMPDL3A   | 309.0043 | 2.031658 | 0.243092 | 8.357576 | 6.40E-17 | 9.27E-16 | 90.52842 | 174.077  | 98.79385 | 544.639  | 487.7172 | 458.2706 |
| 1651  | TRANK1    | 141.599  | 2.031036 | 0.229534 | 8.848535 | 8.87E-19 | 1.43E-17 | 52.04029 | 58.57306 | 57.04997 | 216.5163 | 218.1893 | 247.2249 |
| 13713 | LOC103237 | 14.64357 | 2.030356 | 0.982462 | 2.066601 | 0.038772 | 0.075166 | 0        | 5.474118 | 11.82743 | 17.85702 | 40.6431  | 12.05975 |
| 10411 | ST8SIA2   | 14.72273 | 2.030019 | 0.734524 | 2.763722 | 0.005715 | 0.014593 | 3.794605 | 4.379295 | 9.044508 | 31.24978 | 27.80844 | 12.05975 |
| 16764 | ENPP7     | 9.290533 | 2.028633 | 1.325147 | 1.530874 | 0.125801 | 0.199511 | 0        | 0        | 11.1317  | 11.16063 | 21.39111 | 12.05975 |
| 322   | SERPINA6  | 922.0833 | 2.028508 | 0.12008  | 16.89291 | 5.07E-64 | 4.19E-62 | 357.2349 | 374.9771 | 358.3017 | 1495.525 | 1362.613 | 1583.848 |
| 13364 | IL3RA     | 9.765895 | 2.02719  | 0.950037 | 2.1338   | 0.032859 | 0.065367 | 1.084173 | 2.189647 | 8.348776 | 13.39276 | 23.53022 | 10.04979 |
| 17848 | LOC119626 | 5.828755 | 2.026148 | 1.479846 | 1.369161 | 0.170949 | 0.254632 | 0        | 0        | 6.957314 | 11.16063 | 12.83466 | 4.019918 |
| 18590 | SELENOP   | 2.641899 | 2.026117 | 1.638741 | 1.236386 | 0.216315 | 0.309331 | 0        | 1.094824 | 2.087194 | 2.232127 | 6.417332 | 4.019918 |
| 9099  | LOC103227 | 22.80833 | 2.025387 | 0.656776 | 3.083835 | 0.0      |          |          |          |          |          |          |          |



|       |           |          |          |          |          |          |          |          |          |          |          |          |          |
|-------|-----------|----------|----------|----------|----------|----------|----------|----------|----------|----------|----------|----------|----------|
| 17707 | LOC119619 | 3.084683 | 2.025042 | 1.463933 | 1.383289 | 0.166576 | 0.250095 | 1.084173 | 1.094824 | 1.391463 | 2.232127 | 10.69555 | 2.009959 |
| 10819 | DUOX1     | 19.71877 | 2.024318 | 0.759272 | 2.666129 | 0.007673 | 0.018855 | 2.168345 | 7.116354 | 13.91463 | 42.41041 | 40.6431  | 12.05975 |
| 174   | TM4SF1    | 44188.77 | 2.024282 | 0.095779 | 21.1349  | 3.80E-99 | 5.81E-97 | 16839.91 | 19376.19 | 16097.83 | 71349.94 | 72269.85 | 69198.87 |
| 239   | NLGN1     | 3732.627 | 2.024226 | 0.108179 | 18.71178 | 3.97E-78 | 4.42E-76 | 1395.33  | 1673.985 | 1349.023 | 6008.886 | 5929.615 | 6038.922 |
| 240   | RP56KA3   | 18607.63 | 2.024181 | 0.108286 | 18.69294 | 5.65E-78 | 6.26E-76 | 6996.167 | 8418.646 | 6616.405 | 29234.17 | 29066.24 | 31314.16 |
| 7010  | ATOH8     | 23.99729 | 2.023733 | 0.542647 | 3.729372 | 0.000192 | 0.000728 | 10.84173 | 6.02153  | 11.82743 | 35.71403 | 36.36488 | 43.21412 |
| 9365  | LOC119624 | 15.93202 | 2.02357  | 0.671223 | 3.014752 | 0.002572 | 0.0073   | 3.794605 | 9.306001 | 5.565851 | 29.01765 | 27.80844 | 20.09959 |
| 15245 | LOC103234 | 6.429188 | 2.023508 | 1.130997 | 1.789137 | 0.073593 | 0.128335 | 0.542086 | 2.189647 | 4.87012  | 6.696381 | 19.252   | 5.024897 |
| 18990 | IL13RA2   | 1.976321 | 2.023228 | 1.704928 | 1.186694 | 0.235348 | 0.329458 | 0.542086 | 1.094824 | 0.695731 | 2.232127 | 4.278221 | 3.014938 |
| 18509 | CD164L2   | 3.378399 | 2.023219 | 1.619314 | 1.249429 | 0.211508 | 0.303746 | 0.542086 | 3.284471 | 0        | 11.16063 | 4.278221 | 1.004979 |
| 318   | ALDH1L1   | 1967.141 | 2.023205 | 0.11883  | 17.02597 | 5.27E-65 | 4.41E-63 | 837.5234 | 689.7389 | 805.6569 | 3046.853 | 2966.946 | 3456.124 |
| 212   | SLC17A3   | 1706.968 | 2.023193 | 0.102233 | 19.79004 | 3.63E-87 | 4.55E-85 | 703.6281 | 664.5579 | 654.6832 | 2584.803 | 2800.096 | 2834.042 |
| 2205  | LOC103227 | 124.7094 | 2.023108 | 0.266331 | 7.96205  | 3.05E-14 | 3.68E-13 | 44.45108 | 62.40495 | 41.04815 | 196.4272 | 181.8244 | 222.1005 |
| 14673 | LOC119627 | 8.434861 | 2.022703 | 1.068285 | 1.893411 | 0.058303 | 0.105636 | 4.336691 | 5.474118 | 0        | 22.32127 | 6.417332 | 12.05975 |
| 12382 | LOC103224 | 12.25668 | 2.022553 | 0.869541 | 2.326001 | 0.020018 | 0.042978 | 6.505036 | 4.379295 | 3.478657 | 4.464254 | 40.6431  | 14.06971 |
| 20820 | MSTN      | 1.535478 | 2.021797 | 2.242    | 0.901783 | 0.367172 | 0.468841 | 0        | 1.094824 | 0.695731 | 0        | 6.417332 | 1.004979 |
| 17542 | GNA14     | 4.391485 | 2.02175  | 1.434442 | 1.409433 | 0.158707 | 0.240521 | 0        | 0.547412 | 4.87012  | 4.464254 | 6.417332 | 10.04979 |
| 14712 | LOC103225 | 6.203401 | 2.021712 | 1.070622 | 1.888353 | 0.058979 | 0.106576 | 0.542086 | 2.737059 | 4.174388 | 11.16063 | 8.556443 | 10.04979 |
| 10456 | NOS2      | 14.04662 | 2.021294 | 0.733753 | 2.754734 | 0.005874 | 0.014935 | 3.252518 | 4.926706 | 8.348776 | 29.01765 | 25.66933 | 13.06473 |
| 7181  | LOC103215 | 21.53225 | 2.020577 | 0.5504   | 3.671106 | 0.000242 | 0.000894 | 9.757555 | 8.211177 | 7.653045 | 29.01765 | 36.36488 | 38.18922 |
| 11005 | LOC119627 | 14.9598  | 2.020432 | 0.768726 | 2.628287 | 0.008582 | 0.020731 | 6.505036 | 6.568942 | 4.174388 | 31.24978 | 34.22577 | 7.034856 |
| 11666 | IZUMO1R   | 12.00404 | 2.019565 | 0.814945 | 2.47816  | 0.013206 | 0.030095 | 1.626259 | 4.926706 | 7.653045 | 20.08914 | 25.66933 | 12.05975 |
| 20353 | LOC119627 | 1.53459  | 2.019276 | 2.085138 | 0.968413 | 0.332838 | 0.434709 | 0.542086 | 0.547412 | 0.695731 | 0        | 6.417332 | 1.004979 |
| 20354 | SPATA4    | 1.53459  | 2.019276 | 2.085138 | 0.968413 | 0.332838 | 0.434709 | 0.542086 | 0.547412 | 0.695731 | 0        | 6.417332 | 1.004979 |
| 20355 | LOC119627 | 1.53459  | 2.019276 | 2.085138 | 0.968413 | 0.332838 | 0.434709 | 0.542086 | 0.547412 | 0.695731 | 0        | 6.417332 | 1.004979 |
| 13962 | LOC103247 | 7.399546 | 2.018766 | 0.999747 | 2.019276 | 0.043458 | 0.082749 | 2.168345 | 1.642235 | 4.87012  | 17.85702 | 12.83466 | 5.024897 |
| 9894  | LOC103240 | 13.28977 | 2.017088 | 0.698914 | 2.886031 | 0.003901 | 0.010483 | 5.96295  | 5.474118 | 4.174388 | 26.78552 | 19.252   | 18.08963 |
| 16749 | HOXD11    | 4.055929 | 2.016134 | 1.31483  | 1.53338  | 0.125182 | 0.198697 | 2.168345 | 1.094824 | 1.391463 | 13.39276 | 4.278221 | 2.009959 |
| 8879  | LRFN2     | 20.93854 | 2.015222 | 0.640067 | 3.148456 | 0.001641 | 0.004915 | 4.336691 | 6.02153  | 14.61036 | 40.17829 | 36.36488 | 24.11951 |
| 2080  | LOC103236 | 245.0508 | 2.014632 | 0.257115 | 7.835523 | 4.67E-15 | 5.97E-14 | 113.2961 | 74.44801 | 105.0554 | 444.1933 | 260.9715 | 472.3404 |
| 2478  | MCHR1     | 130.5035 | 2.014609 | 0.281556 | 7.155277 | 8.35E-13 | 8.96E-12 | 46.61943 | 68.42648 | 39.65669 | 247.7661 | 177.5462 | 203.0059 |
| 10268 | CAPN11    | 17.75604 | 2.014226 | 0.720314 | 2.796315 | 0.005169 | 0.013383 | 5.96295  | 3.284471 | 11.82743 | 22.32127 | 47.06043 | 16.07967 |
| 12092 | MUCL3     | 10.74516 | 2.013694 | 0.843068 | 2.388531 | 0.016916 | 0.037191 | 3.794605 | 3.831883 | 4.87012  | 24.5534  | 21.39111 | 6.029877 |
| 4976  | TMEM229I  | 37.56234 | 2.013463 | 0.428397 | 4.699992 | 2.60E-06 | 1.39E-05 | 17.88885 | 11.49956 | 15.30609 | 62.49956 | 59.8951  | 58.28881 |
| 18395 | TGM5      | 3.173189 | 2.013067 | 1.590824 | 1.265424 | 0.205719 | 0.297312 | 0        | 1.642235 | 2.087194 | 11.16063 | 2.139111 | 2.009959 |
| 1500  | LOC103247 | 162.4793 | 2.01244  | 0.217644 | 9.246487 | 2.32E-20 | 4.11E-19 | 69.92914 | 64.59459 | 58.44144 | 254.4625 | 280.2235 | 247.2249 |
| 6526  | MYO15A    | 31.97196 | 2.012215 | 0.512251 | 3.928183 | 8.56E-05 | 0.000349 | 14.09425 | 7.116354 | 16.69755 | 53.57105 | 64.17332 | 36.17926 |
| 9627  | CPLX4     | 20.09017 | 2.01191  | 0.681171 | 2.953607 | 0.003141 | 0.008673 | 3.794605 | 4.926706 | 15.30609 | 40.17829 | 34.22577 | 22.10955 |
| 12697 | LOC119619 | 8.729875 | 2.01139  | 0.890107 | 2.259719 | 0.023839 | 0.049914 | 2.710432 | 2.737059 | 4.87012  | 22.32127 | 10.69555 | 9.044815 |
| 3697  | LOC119627 | 59.50262 | 2.010208 | 0.356195 | 5.643566 | 1.67E-08 | 1.20E-07 | 22.22554 | 22.44388 | 26.43779 | 73.66019 | 119.7902 | 92.45811 |
| 9514  | LOC119627 | 19.90136 | 2.009675 | 0.674309 | 2.980348 | 0.002879 | 0.008045 | 4.336691 | 9.306001 | 9.740239 | 40.17829 | 42.78221 | 13.06473 |
| 5910  | ESPN      | 38.21071 | 2.009101 | 0.477567 | 4.206948 | 2.59E-05 | 0.000116 | 13.55216 | 10.94824 | 20.87194 | 60.26743 | 83.42532 | 40.19918 |
| 15085 | ZAR1L     | 7.982346 | 2.008541 | 1.10417  | 1.81905  | 0.068904 | 0.121432 | 5.96295  | 0        | 3.478657 | 11.16063 | 19.252   | 8.039836 |
| 16957 | LOC119619 | 4.228193 | 2.008324 | 1.340346 | 1.498362 | 0.134039 | 0.210145 | 2.168345 | 2.737059 | 0        | 11.16063 | 4.278221 | 5.024897 |
| 9382  | ZNF280A   | 19.89387 | 2.007593 | 0.666551 | 3.011911 | 0.002596 | 0.007356 | 4.336691 | 5.474118 | 13.91463 | 40.17829 | 36.36488 | 19.09461 |
| 13498 | CRYBG2    | 10.27451 | 2.006041 | 0.95191  | 2.107384 | 0.035084 | 0.0691   | 1.626259 | 1.642235 | 9.044508 | 15.62489 | 25.66933 | 8.039836 |
| 15559 | CD300A    | 7.788839 | 2.004542 | 1.155653 | 1.734554 | 0.08282  | 0.141511 | 0        | 4.379295 | 4.87012  | 8.928508 | 23.53022 | 5.024897 |
| 10772 | CCR10     | 16.92991 | 2.004123 | 0.74942  | 2.674234 | 0.00749  | 0.018485 | 3.252518 | 3.831883 | 13.2189  | 24.5534  | 40.6431  | 16.07967 |
| 15123 | TEX38     | 5.731778 | 2.00186  | 1.106235 | 1.809615 | 0.070355 | 0.123656 | 2.710432 | 3.284471 | 0.695731 | 6.696381 | 14.97377 | 6.029877 |
| 294   | PDE2A     | 1356.869 | 2.001749 | 0.113942 | 17.56812 | 4.32E-69 | 3.91E-67 | 522.0292 | 526.0628 | 581.6314 | 2087.039 | 2072.798 | 2351.652 |
| 20796 | LOC119627 | 1.51626  | 2.001681 | 2.212251 | 0.904816 | 0.365563 | 0.467325 | 0.542086 | 0        | 1.391463 | 0        | 2.139111 | 5.024897 |
| 15274 | LOC103230 | 7.152327 | 2.000813 | 1.121369 | 1.784258 | 0.074382 | 0.129464 | 0        | 4.379295 | 4.174388 | 15.62489 | 10.69555 | 8.039836 |
| 19780 | LOC119619 | 1.996071 | 2.000579 | 1.893831 | 1.056366 | 0.290801 | 0.390847 | 1.626259 | 0        | 0.695731 | 2.232127 | 6.417332 | 1.004979 |
| 15132 | ACMSD     | 5.785502 | 1.999865 | 1.105482 | 1.809044 | 0.070444 | 0.123762 | 1.084173 | 1.094824 | 4.87012  | 8.928508 | 10.69555 | 8.039836 |
| 3561  | GAL3ST1   | 58.57533 | 1.999652 | 0.344989 | 5.796283 | 6.78E-09 | 5.06E-08 | 23.8518  | 19.70683 | 27.13352 | 89.28508 | 91.98176 | 99.49297 |
| 3136  | SNCB      | 80.12108 | 1.999405 | 0.320458 | 6.239209 | 4.40E-10 | 3.73E-09 | 29.27266 | 37.224   | 29.91645 | 93.74933 | 151.8769 | 138.6872 |
| 10573 | LOC103226 | 15.77063 | 1.999296 | 0.732771 | 2.728406 | 0.006364 | 0.016003 | 8.131296 | 2.737059 | 8.348776 | 11.16063 | 32.08666 | 32.15934 |
| 15486 | LOC119627 | 5.153758 | 1.999225 | 1.144401 | 1.746963 | 0.080644 | 0.138442 | 1.626259 | 1.642235 | 2.782925 | 11.16063 | 10.69555 | 3.014938 |
| 1768  | S1PR1     | 182.9438 | 1.999134 | 0.233999 | 8.54336  | 1.30E-17 | 1.96E-16 | 56.91907 | 91.41777 | 71.66033 | 290.1765 | 275.9453 | 311.5436 |
| 14339 | TNNI1     | 11.63384 | 1.997478 | 1.02201  | 1.95446  | 0.050647 | 0.093894 | 0.542086 | 1.094824 | 12.52316 | 22.32127 | 19.252   | 14.06971 |
| 21993 | PDE6G     | 1.090919 | 1.997185 | 2.739736 | 0.72897  | 0.46602  | 0.563333 | 0        | 0        | 1.391463 | 0        | 2.139111 | 3.014938 |
| 9887  | LOC103247 | 21.05345 | 1.997153 | 0.69186  | 2.886642 | 0.003894 | 0.01047  | 3.794605 | 5.474118 | 16.00182 | 40.17829 | 42.78221 | 18.08963 |
| 16088 | AWAT2     | 6.25625  | 1.99715  | 1.211628 | 1.648319 | 0.099287 | 0.164069 | 1.084173 | 5.474118 | 0.695731 | 11.16063 | 17.11289 | 2.009959 |
| 8398  | BMP3      | 19.59434 | 1.996767 | 0.60827  | 3.282698 | 0.001028 | 0.003254 | 4.878777 | 8.758589 | 9.740239 | 35.71403 | 36.36488 | 22.10955 |
| 7962  | LOC103226 | 20.013   | 1.996376 | 0.583501 | 3.421376 | 0.000623 | 0.00208  | 8.673382 | 8.758589 | 6.261582 | 40.17829 | 32.08666 | 24.11951 |
| 12227 | ATP4A     | 10.31071 | 1.996147 | 0.8454   | 2.361188 | 0.018216 | 0.039608 | 3.252518 | 2.737059 | 6.261582 | 22.32127 | 19.252   | 8.039836 |
| 8442  | LOC119627 | 21.83454 | 1.994384 | 0.609683 | 3.271184 | 0.001071 | 0.003373 | 8.673382 | 4.926706 | 12.52316 | 35.71403 | 47.06043 | 22.10955 |
| 26599 | LOC119627 | 0.450948 | 1.994089 | 4.056411 | 0.491589 | 0.62301  | NA       | 0        | 0        | 0.695731 | 0        | 0        | 2.009959 |
| 26886 | LOC103238 | 0.450948 | 1.994089 | 4.056411 | 0.491589 | 0.62301  | NA       | 0        | 0        | 0.695731 | 0        | 0        | 2.009959 |
| 27086 | LOC119624 | 0.450948 | 1.994089 | 4.056411 | 0.491589 | 0.62301  | NA       | 0        | 0        | 0.695731 | 0        | 0        | 2.009959 |
| 27779 | LOC119627 | 0.450948 | 1.9      |          |          |          |          |          |          |          |          |          |          |



|       |           |          |          |          |          |          |          |          |          |          |          |          |          |
|-------|-----------|----------|----------|----------|----------|----------|----------|----------|----------|----------|----------|----------|----------|
| 28630 | LOC103215 | 0.425341 | 1.994089 | 4.056411 | 0.491589 | 0.62301  | NA       | 0.542086 | 0        | 0        | 0        | 0        | 2.009959 |
| 28634 | LOC119620 | 0.450948 | 1.994089 | 4.056411 | 0.491589 | 0.62301  | NA       | 0        | 0        | 0.695731 | 0        | 0        | 2.009959 |
| 28922 | LOC103227 | 0.450948 | 1.994089 | 4.056411 | 0.491589 | 0.62301  | NA       | 0        | 0        | 0.695731 | 0        | 0        | 2.009959 |
| 28945 | LOC103234 | 0.450948 | 1.994089 | 4.056411 | 0.491589 | 0.62301  | NA       | 0        | 0        | 0.695731 | 0        | 0        | 2.009959 |
| 28963 | LOC103234 | 0.426228 | 1.994089 | 4.056411 | 0.491589 | 0.62301  | NA       | 0        | 0.547412 | 0        | 0        | 0        | 2.009959 |
| 29263 | LOC119625 | 0.425341 | 1.994089 | 4.056411 | 0.491589 | 0.62301  | NA       | 0.542086 | 0        | 0        | 0        | 0        | 2.009959 |
| 29489 | LOC119625 | 0.450948 | 1.994089 | 4.056411 | 0.491589 | 0.62301  | NA       | 0        | 0        | 0.695731 | 0        | 0        | 2.009959 |
| 29532 | LOC119625 | 0.426228 | 1.994089 | 4.056411 | 0.491589 | 0.62301  | NA       | 0        | 0.547412 | 0        | 0        | 0        | 2.009959 |
| 12472 | LOC103247 | 9.387808 | 1.993887 | 0.864553 | 2.306262 | 0.021096 | 0.044968 | 2.168345 | 5.474118 | 3.478657 | 22.32127 | 12.83466 | 10.04979 |
| 19161 | MRGPREF   | 2.424963 | 1.993346 | 1.72029  | 1.158726 | 0.246568 | 0.342083 | 0        | 2.189647 | 0.695731 | 2.232127 | 6.417332 | 3.014938 |
| 19229 | LOC103214 | 2.013349 | 1.993261 | 1.734785 | 1.148996 | 0.250558 | 0.346408 | 0.542086 | 1.094824 | 0.695731 | 4.464254 | 4.278221 | 1.004979 |
| 18999 | LOC119620 | 2.645094 | 1.993126 | 1.681944 | 1.185013 | 0.236012 | 0.330248 | 0        | 0.547412 | 2.782925 | 2.232127 | 4.278221 | 6.029877 |
| 963   | LOC119627 | 2175.065 | 1.992957 | 0.17871  | 11.15189 | 7.01E-29 | 1.94E-27 | 607.1367 | 1117.815 | 894.7105 | 3709.795 | 3506.002 | 3214.929 |
| 11801 | LGALS2    | 13.40975 | 1.992894 | 0.813822 | 2.448808 | 0.014333 | 0.032289 | 4.878777 | 2.737059 | 8.348776 | 20.08914 | 36.36488 | 8.039836 |
| 8306  | ADD2      | 20.23034 | 1.992715 | 0.601723 | 3.311684 | 0.000927 | 0.002968 | 5.420864 | 7.116354 | 11.82743 | 31.24978 | 40.6431  | 25.12449 |
| 20264 | A1BG      | 1.554175 | 1.992007 | 2.021636 | 0.985344 | 0.324455 | 0.425621 | 0        | 0.547412 | 1.391463 | 2.232127 | 2.139111 | 3.014938 |
| 13030 | LOC103215 | 9.205176 | 1.991983 | 0.905866 | 2.19898  | 0.027879 | 0.056882 | 2.710432 | 3.284471 | 4.87012  | 20.08914 | 19.252   | 5.024897 |
| 18135 | LOC103247 | 3.777869 | 1.990965 | 1.513567 | 1.315412 | 0.188371 | 0.276143 | 1.626259 | 2.737059 | 0        | 4.464254 | 12.83466 | 1.004979 |
| 17217 | LOC103247 | 9.129059 | 1.990325 | 1.35836  | 1.465241 | 0.142855 | 0.220584 | 0        | 0        | 11.1317  | 8.928508 | 25.66933 | 9.044815 |
| 10265 | NRG2      | 23.32981 | 1.990209 | 0.711558 | 2.796974 | 0.005158 | 0.01336  | 2.710432 | 6.02153  | 19.48048 | 46.87467 | 42.78221 | 22.10955 |
| 13371 | LOC103237 | 8.008309 | 1.989831 | 0.93333  | 2.131971 | 0.033009 | 0.065631 | 3.252518 | 2.737059 | 3.478657 | 11.16063 | 21.39111 | 6.029877 |
| 2222  | RSPH4A    | 108.9545 | 1.989703 | 0.263139 | 7.56142  | 3.99E-14 | 4.77E-13 | 47.7036  | 36.12918 | 48.00546 | 171.8738 | 171.1289 | 178.8863 |
| 20052 | LOC119615 | 2.218865 | 1.987957 | 1.94844  | 1.020282 | 0.307595 | 0.40781  | 0        | 0        | 2.782925 | 2.232127 | 4.278221 | 4.019918 |
| 12167 | ACAP1     | 12.35303 | 1.987479 | 0.837716 | 2.372498 | 0.017668 | 0.038605 | 4.878777 | 2.189647 | 7.653045 | 24.5534  | 27.80844 | 7.034856 |
| 2550  | LOC103217 | 85.72804 | 1.987404 | 0.281693 | 7.055219 | 1.72E-12 | 1.80E-11 | 34.69353 | 32.84471 | 36.17803 | 133.9276 | 139.0422 | 137.6822 |
| 5239  | LOC119615 | 48.54629 | 1.986897 | 0.435741 | 4.559809 | 5.12E-06 | 2.60E-05 | 24.39389 | 14.78012 | 18.78475 | 78.12444 | 106.9555 | 48.23901 |
| 13443 | LOC103234 | 7.816887 | 1.986724 | 0.937814 | 2.118462 | 0.034136 | 0.067508 | 4.878777 | 1.642235 | 2.782925 | 17.85702 | 10.69555 | 9.044815 |
| 19343 | RPP38-DT  | 1.997847 | 1.985888 | 1.760532 | 1.128004 | 0.259318 | 0.356406 | 0.542086 | 1.094824 | 0.695731 | 2.232127 | 6.417332 | 1.004979 |
| 4496  | LOC103247 | 46.9743  | 1.985489 | 0.396099 | 5.012614 | 5.37E-07 | 3.18E-06 | 20.0572  | 20.25424 | 16.00182 | 66.96381 | 96.25998 | 62.30873 |
| 1469  | PTGS2     | 196.4067 | 1.98544  | 0.212815 | 9.329431 | 1.06E-20 | 1.93E-19 | 78.60252 | 80.46954 | 80.00911 | 272.3195 | 295.1973 | 371.8424 |
| 21605 | LOC119624 | 1.127947 | 1.984837 | 2.513838 | 0.789564 | 0.429782 | 0.52875  | 0        | 0        | 1.391463 | 2.232127 | 2.139111 | 1.004979 |
| 21606 | LOC119628 | 1.127947 | 1.984837 | 2.513838 | 0.789564 | 0.429782 | 0.52875  | 0        | 0        | 1.391463 | 2.232127 | 2.139111 | 1.004979 |
| 21607 | LOC103247 | 1.127947 | 1.984837 | 2.513838 | 0.789564 | 0.429782 | 0.52875  | 0        | 0        | 1.391463 | 2.232127 | 2.139111 | 1.004979 |
| 21608 | LOC119627 | 1.127947 | 1.984837 | 2.513838 | 0.789564 | 0.429782 | 0.52875  | 0        | 0        | 1.391463 | 2.232127 | 2.139111 | 1.004979 |
| 21609 | NTF4      | 1.127947 | 1.984837 | 2.513838 | 0.789564 | 0.429782 | 0.52875  | 0        | 0        | 1.391463 | 2.232127 | 2.139111 | 1.004979 |
| 597   | ANOS1     | 597.4806 | 1.984794 | 0.145551 | 13.63641 | 2.43E-42 | 1.08E-40 | 237.4338 | 270.9688 | 214.981  | 946.4218 | 892.0091 | 1023.069 |
| 9545  | LOC119627 | 17.42775 | 1.98374  | 0.667073 | 2.973798 | 0.002941 | 0.008192 | 4.878777 | 8.211177 | 7.653045 | 31.24978 | 38.50399 | 14.06971 |
| 11584 | LOC119627 | 13.92961 | 1.983339 | 0.793908 | 2.498198 | 0.012483 | 0.028647 | 4.336691 | 3.284471 | 9.044508 | 26.78552 | 32.08666 | 8.039836 |
| 14877 | LOC119625 | 5.343832 | 1.98287  | 1.067216 | 1.857984 | 0.063171 | 0.112845 | 2.168345 | 2.189647 | 2.087194 | 11.16063 | 6.417332 | 8.039836 |
| 15104 | TNFRSF8   | 5.703802 | 1.982784 | 1.093496 | 1.813252 | 0.069793 | 0.122847 | 1.084173 | 3.831883 | 2.087194 | 4.464254 | 10.69555 | 12.05975 |
| 18753 | LOC103214 | 2.474831 | 1.98277  | 1.619766 | 1.224109 | 0.220911 | 0.313172 | 1.626259 | 0.547412 | 0.695731 | 6.696381 | 4.278221 | 1.004979 |
| 15867 | LOC119627 | 4.625723 | 1.981334 | 1.17354  | 1.68834  | 0.091346 | 0.152972 | 2.710432 | 2.189647 | 0.695731 | 6.696381 | 6.417332 | 9.044815 |
| 11398 | PLPP4     | 13.29221 | 1.981139 | 0.780801 | 2.537315 | 0.011171 | 0.026055 | 4.878777 | 2.737059 | 8.348776 | 33.4819  | 19.252   | 11.05477 |
| 19329 | LOC103216 | 2.461991 | 1.980967 | 1.753029 | 1.130025 | 0.258466 | 0.355492 | 0        | 2.189647 | 0.695731 | 4.464254 | 6.417332 | 1.004979 |
| 7630  | SP6       | 29.58271 | 1.979112 | 0.563048 | 3.515    | 0.00044  | 0.001532 | 13.55216 | 6.02153  | 16.00182 | 58.0353  | 57.75599 | 26.12947 |
| 722   | CFB       | 348.984  | 1.978583 | 0.15644  | 12.64755 | 1.15E-36 | 4.25E-35 | 143.6529 | 146.7064 | 133.5804 | 537.9426 | 556.1688 | 575.8532 |
| 7882  | LOC103220 | 20.87707 | 1.977506 | 0.573789 | 3.446399 | 0.000568 | 0.001916 | 7.047123 | 10.40082 | 7.653045 | 31.24978 | 42.78221 | 26.12947 |
| 397   | CA2       | 1014.432 | 1.977327 | 0.125741 | 15.72541 | 1.01E-55 | 6.78E-54 | 419.0328 | 366.7659 | 448.7467 | 1647.31  | 1512.351 | 1692.385 |
| 12097 | ESRP2     | 13.84037 | 1.97681  | 0.828061 | 2.387275 | 0.016974 | 0.037302 | 4.878777 | 6.02153  | 5.565851 | 15.62489 | 44.92132 | 6.029877 |
| 15111 | LOC119625 | 5.605594 | 1.976064 | 1.090911 | 1.811388 | 0.070081 | 0.123294 | 1.084173 | 2.189647 | 3.478657 | 11.16063 | 10.69555 | 5.024897 |
| 19046 | TCF21     | 2.666619 | 1.97519  | 1.677402 | 1.177529 | 0.238984 | 0.333526 | 0        | 0.547412 | 2.782925 | 2.232127 | 6.417332 | 4.019918 |
| 10380 | TFR2      | 16.37824 | 1.973632 | 0.712614 | 2.769569 | 0.005613 | 0.014375 | 3.252518 | 5.474118 | 11.1317  | 31.24978 | 32.08666 | 15.07469 |
| 4363  | DNAH2     | 97.54065 | 1.973191 | 0.386505 | 5.10522  | 3.30E-07 | 2.01E-06 | 34.15144 | 28.46541 | 55.65851 | 151.7846 | 226.7457 | 88.43819 |
| 10388 | SLC12A3   | 15.81548 | 1.972342 | 0.712457 | 2.768366 | 0.005634 | 0.014418 | 2.710432 | 8.758589 | 7.653045 | 22.32127 | 36.36488 | 17.08465 |
| 19042 | FEN2      | 2.71915  | 1.971253 | 1.673416 | 1.177982 | 0.238804 | 0.3334   | 0        | 0.547412 | 2.782925 | 6.696381 | 4.278221 | 2.009959 |
| 541   | DDND2A    | 692.6203 | 1.971176 | 0.139024 | 14.17873 | 1.24E-45 | 6.10E-44 | 305.1946 | 245.7879 | 294.9901 | 1046.868 | 1093.086 | 1169.796 |
| 1351  | GPC3      | 189.1586 | 1.970646 | 0.202872 | 9.713758 | 2.63E-22 | 5.18E-21 | 79.6867  | 77.73248 | 72.35606 | 305.8014 | 323.0057 | 276.3694 |
| 20808 | CD96      | 1.538672 | 1.970539 | 2.181711 | 0.903208 | 0.366416 | 0.468134 | 0        | 0.547412 | 1.391463 | 0        | 4.278221 | 3.014938 |
| 1550  | GPR137C   | 155.109  | 1.96974  | 0.216864 | 9.082818 | 1.06E-19 | 1.81E-18 | 61.25576 | 63.49977 | 64.70302 | 258.9267 | 231.024  | 251.2449 |
| 14495 | LOC119620 | 7.851119 | 1.969705 | 1.022779 | 1.925836 | 0.054125 | 0.099269 | 1.626259 | 1.642235 | 6.261582 | 11.16063 | 21.39111 | 5.024897 |
| 20180 | LOC119627 | 2.240391 | 1.969311 | 1.969172 | 1.000071 | 0.317276 | 0.417957 | 0        | 0        | 2.782925 | 2.232127 | 6.417332 | 2.009959 |
| 8213  | LOC119624 | 19.89317 | 1.967744 | 0.588717 | 3.342426 | 0.00083  | 0.002688 | 9.757555 | 6.568942 | 7.653045 | 40.17829 | 32.08666 | 23.11453 |
| 9348  | MAP3K7CL  | 19.11349 | 1.966765 | 0.65144  | 3.019105 | 0.002535 | 0.00721  | 4.336691 | 6.02153  | 13.2189  | 22.32127 | 40.6431  | 28.13943 |
| 12842 | LOC103215 | 9.143428 | 1.966471 | 0.881646 | 2.230456 | 0.025717 | 0.053239 | 2.168345 | 4.926706 | 4.174388 | 20.08914 | 6.417332 | 17.08465 |
| 18987 | TBX1      | 2.4456   | 1.966247 | 1.656465 | 1.187014 | 0.235222 | 0.329351 | 0.542086 | 1.642235 | 0.695731 | 2.232127 | 8.556443 | 1.004979 |
| 3349  | LOC119625 | 65.89984 | 1.965767 | 0.327949 | 5.994122 | 2.05E-09 | 1.62E-08 | 28.73058 | 29.01283 | 22.95914 | 107.1421 | 91.98176 | 115.5726 |
| 8767  | TNS4      | 26.1992  | 1.965072 | 0.617484 | 3.182385 | 0.001461 | 0.004429 | 8.131296 | 8.211177 | 15.30609 | 60.26743 | 49.19955 | 16.07967 |
| 6464  | SEMA6D    | 29.68446 | 1.964904 | 0.497029 | 3.953298 | 7.71E-05 | 0.000317 | 8.673382 | 14.78012 | 12.52316 | 51.33892 | 55.61688 | 35.17428 |
| 14705 | PKD1L3    | 7.117037 | 1.964068 | 1.039375 | 1.889664 | 0.058803 | 0.106309 | 1.626259 | 5.474118 | 1.391463 | 8.928508 | 19.252   | 6.029877 |
| 18408 | GP6       | 2.887863 | 1.963153 | 1.553375 | 1.263799 | 0.206302 | 0.297927 | 2.168345 | 0        | 1.391463 | 4.464254 | 4.278221 | 5.024897 |
| 18693 | ELSPBP1   | 4.480781 | 1.962164 | 1.595298 | 1.229967 | 0.218709 | 0.311046 | 0        | 0        | 5.565851 | 4.464254 | 12.83466 | 4.019918 |
| 7522  | PRPH      | 31.43829 | 1.960839 | 0.552059 | 3.551866 | 0.000383 | 0.001352 | 9.215468 | 13.6853  | 15.30609 | 37       |          |          |



|       |           |          |          |          |          |           |           |          |          |          |          |          |          |
|-------|-----------|----------|----------|----------|----------|-----------|-----------|----------|----------|----------|----------|----------|----------|
| 22087 | LOC103236 | 1.112444 | 1.960324 | 2.755394 | 0.71145  | 0.476806  | 0.573803  | 0        | 0        | 1.391463 | 0        | 4.278221 | 1.004979 |
| 22088 | RAG2      | 1.112444 | 1.960324 | 2.755394 | 0.71145  | 0.476806  | 0.573803  | 0        | 0        | 1.391463 | 0        | 4.278221 | 1.004979 |
| 22089 | LOC103227 | 1.112444 | 1.960324 | 2.755394 | 0.71145  | 0.476806  | 0.573803  | 0        | 0        | 1.391463 | 0        | 4.278221 | 1.004979 |
| 22091 | LOC119627 | 1.112444 | 1.960324 | 2.755394 | 0.71145  | 0.476806  | 0.573803  | 0        | 0        | 1.391463 | 0        | 4.278221 | 1.004979 |
| 9194  | SCX       | 18.73337 | 1.960094 | 0.641382 | 3.056049 | 0.002243  | 0.006485  | 7.047123 | 7.116354 | 9.044508 | 40.17829 | 12.83466 | 36.17926 |
| 478   | VAMP8     | 1023.912 | 1.960065 | 0.1322   | 14.82649 | 9.88E-50  | 5.49E-48  | 458.6051 | 354.7229 | 443.1809 | 1685.256 | 1578.664 | 1623.042 |
| 371   | RBMA7     | 3433.224 | 1.959403 | 0.121501 | 16.12664 | 1.66E-58  | 1.19E-56  | 1273.903 | 1657.016 | 1282.233 | 5488.8   | 5266.49  | 5630.9   |
| 1207  | LOC119624 | 563.6688 | 1.958718 | 0.19337  | 10.1294  | 4.09E-24  | 9.01E-23  | 298.6896 | 171.3399 | 221.2426 | 881.6902 | 966.878  | 842.1728 |
| 16269 | SH2D1A    | 5.2187   | 1.957928 | 1.213006 | 1.614112 | 0.106503  | 0.174036  | 1.626259 | 0.547412 | 4.174388 | 13.39276 | 8.556443 | 3.014938 |
| 14834 | GNG3      | 6.056542 | 1.957678 | 1.04973  | 1.864934 | 0.062191  | 0.111456  | 1.084173 | 2.189647 | 4.174388 | 11.16063 | 10.69555 | 7.034856 |
| 4405  | DNAH17    | 68.59765 | 1.957344 | 0.385497 | 5.077452 | 3.83E-07  | 2.31E-06  | 19.51511 | 32.84471 | 31.30791 | 102.6778 | 151.8769 | 73.3635  |
| 15999 | LOC119627 | 4.684276 | 1.957028 | 1.174787 | 1.665858 | 0.095742  | 0.159091  | 2.710432 | 2.189647 | 0.695731 | 8.928508 | 8.556443 | 5.024897 |
| 18433 | CYP7A1    | 2.891414 | 1.956591 | 1.553666 | 1.259338 | 0.207908  | 0.299856  | 0        | 2.189647 | 1.391463 | 4.464254 | 4.278221 | 5.024897 |
| 21989 | OSTN      | 0.888597 | 1.95636  | 2.681744 | 0.72951  | 0.46569   | 0.563025  | 0.542086 | 0.547412 | 0        | 2.232127 | 0        | 2.009959 |
| 218   | TGFB2     | 10560.23 | 1.956088 | 0.100378 | 19.48727 | 1.41E-84  | 1.72E-82  | 4320.97  | 4610.302 | 4054.722 | 16028.9  | 15867.92 | 18478.56 |
| 13618 | SLC22A31  | 7.132019 | 1.955967 | 0.937712 | 2.085893 | 0.036988  | 0.072208  | 2.168345 | 3.831883 | 2.782925 | 13.39276 | 8.556443 | 12.05975 |
| 21717 | LOC119620 | 1.350079 | 1.955855 | 2.521713 | 0.775606 | 0.437982  | 0.536158  | 1.626259 | 0        | 0        | 4.464254 | 0        | 2.009959 |
| 201   | C1S       | 3624.686 | 1.95545  | 0.097    | 20.15927 | 2.23E-90  | 2.95E-88  | 1528.684 | 1433.672 | 1498.605 | 5678.531 | 5394.837 | 6213.788 |
| 22788 | LOC103227 | 0.924738 | 1.955149 | 3.286998 | 0.594813 | 0.551969  | 0.643939  | 1.084173 | 0        | 0        | 4.464254 | 0        | 0        |
| 16207 | LOC103244 | 5.063997 | 1.953973 | 1.201552 | 1.626207 | 0.103906  | 0.17044   | 2.710432 | 2.737059 | 0.695731 | 2.232127 | 14.97377 | 7.034856 |
| 350   | LOC103216 | 53005.29 | 1.953896 | 0.118929 | 16.42913 | 1.18E-60  | 8.99E-59  | 23885.41 | 19099.2  | 22266.88 | 81463.71 | 75581.2  | 95735.35 |
| 20849 | SERPBN1C  | 2.224888 | 1.953719 | 2.17451  | 0.898464 | 0.368938  | 0.470441  | 0        | 0        | 2.782925 | 0        | 8.556443 | 2.009959 |
| 21021 | NCBP2L    | 2.261916 | 1.953283 | 2.226809 | 0.877167 | 0.380396  | 0.481059  | 0        | 0        | 2.782925 | 2.232127 | 8.556443 | 0        |
| 10896 | IGFALS    | 14.11311 | 1.952256 | 0.736381 | 2.65115  | 0.008022  | 0.019572  | 8.131296 | 2.189647 | 6.957314 | 26.78552 | 23.53022 | 17.08465 |
| 12931 | TRNAI-AAI | 9.540296 | 1.952248 | 0.880949 | 2.216075 | 0.026686  | 0.054865  | 5.96295  | 4.379295 | 1.391463 | 17.85702 | 8.556443 | 19.09461 |
| 8784  | TMEM2007  | 20.23033 | 1.952141 | 0.614125 | 3.178736 | 0.001479  | 0.004477  | 5.96295  | 8.211177 | 10.43597 | 40.17829 | 38.50399 | 18.08963 |
| 18385 | LOC119627 | 2.46341  | 1.952057 | 1.53991  | 1.267643 | 0.204925  | 0.296443  | 1.084173 | 0.547412 | 1.391463 | 4.464254 | 4.278221 | 3.014938 |
| 12946 | NR4A3     | 8.968594 | 1.951297 | 0.881318 | 2.214067 | 0.026824  | 0.055084  | 1.626259 | 3.831883 | 5.565851 | 15.62489 | 17.11289 | 10.04979 |
| 22371 | TRNAA-AG  | 0.889485 | 1.951033 | 2.942401 | 0.663075 | 0.507282  | 0.602812  | 0        | 1.094824 | 0        | 2.232127 | 0        | 2.009959 |
| 22372 | LOC119627 | 0.889485 | 1.951033 | 2.942401 | 0.663075 | 0.507282  | 0.602812  | 0        | 1.094824 | 0        | 2.232127 | 0        | 2.009959 |
| 3938  | RNF212    | 55.41731 | 1.951013 | 0.360326 | 5.414584 | 6.14E-08  | 4.15E-07  | 24.39389 | 19.15941 | 24.3506  | 95.98146 | 96.25998 | 72.35852 |
| 287   | ATP6V1H   | 2374.524 | 1.95072  | 0.110268 | 17.69064 | 4.95E-70  | 4.59E-68  | 1071.163 | 936.0742 | 921.8441 | 3816.937 | 3478.194 | 4022.933 |
| 15613 | MYOZ2     | 5.872551 | 1.950135 | 1.128964 | 1.727367 | 0.084102  | 0.143097  | 1.626259 | 3.284471 | 2.087194 | 13.39276 | 12.83466 | 2.009959 |
| 11416 | ADCY4     | 19.80822 | 1.948772 | 0.769492 | 2.532543 | 0.011324  | 0.02637   | 2.168345 | 8.211177 | 13.91463 | 29.01765 | 53.47777 | 10.25975 |
| 11275 | LOC119615 | 18.04751 | 1.948686 | 0.760218 | 2.563326 | 0.010367  | 0.024445  | 8.131296 | 6.02153  | 7.653045 | 31.24978 | 49.19955 | 6.029877 |
| 200   | CTSA      | 5768.754 | 1.948239 | 0.096609 | 20.1663  | 1.94E-90  | 2.57E-88  | 2368.917 | 2425.034 | 2332.092 | 9158.417 | 8376.757 | 9951.307 |
| 14597 | IL5RA     | 5.987682 | 1.948198 | 1.021709 | 1.906804 | 0.056546  | 0.102985  | 2.710432 | 3.284471 | 1.391463 | 8.928508 | 8.556443 | 11.05477 |
| 20477 | LOC103236 | 1.5757   | 1.948025 | 2.049765 | 0.950365 | 0.341927  | 0.44392   | 0        | 0.547412 | 1.391463 | 2.232127 | 4.278221 | 1.004979 |
| 16244 | CHST13    | 4.226877 | 1.947907 | 1.20393  | 1.617957 | 0.105672  | 0.172945  | 1.084173 | 2.737059 | 1.391463 | 6.696381 | 6.417332 | 7.034856 |
| 3939  | LTC4S     | 76.47824 | 1.947808 | 0.359809 | 5.413453 | 6.18E-08  | 4.17E-07  | 36.86187 | 18.06459 | 39.65669 | 104.624  | 109.0946 | 114.5677 |
| 19173 | LOC119615 | 2.44702  | 1.947629 | 1.682829 | 1.157354 | 0.247128  | 0.342664  | 1.626259 | 0        | 1.391463 | 2.232127 | 6.417332 | 3.014938 |
| 9791  | POU2F3    | 15.25046 | 1.946882 | 0.669987 | 2.90585  | 0.003663  | 0.009945  | 4.336691 | 5.474118 | 9.044508 | 29.01765 | 23.53022 | 20.09959 |
| 16915 | LOC119627 | 4.005277 | 1.94687  | 1.294625 | 1.50381  | 0.13263   | 0.208453  | 1.084173 | 0.547412 | 3.478657 | 4.464254 | 6.417332 | 8.039836 |
| 10918 | CLDN11    | 16.78762 | 1.946347 | 0.735243 | 2.647217 | 0.008116  | 0.019762  | 6.505036 | 5.474118 | 8.348776 | 42.41041 | 29.94755 | 8.039836 |
| 3310  | PIWIL2    | 68.5448  | 1.946236 | 0.322656 | 6.031928 | 1.62E-09  | 1.30E-08  | 25.47806 | 32.2973  | 26.43779 | 116.0706 | 115.512  | 95.47305 |
| 8095  | APOL4     | 26.25383 | 1.945645 | 0.575265 | 3.382172 | 0.000719  | 0.002361  | 8.131296 | 8.758589 | 15.30609 | 40.17829 | 62.03421 | 23.11453 |
| 13964 | SSTR1     | 10.44043 | 1.94532  | 0.963521 | 2.01897  | 0.04349   | 0.082792  | 1.626259 | 1.642235 | 9.740239 | 29.01765 | 8.556443 | 12.05975 |
| 16923 | ARHGAP15  | 3.782318 | 1.944757 | 1.294053 | 1.502841 | 0.13288   | 0.208746  | 1.084173 | 1.642235 | 2.087194 | 6.696381 | 2.139111 | 9.044815 |
| 10567 | VSX1      | 13.52183 | 1.944741 | 0.712577 | 2.729165 | 0.006349  | 0.015974  | 4.336691 | 8.211177 | 4.174388 | 15.62489 | 25.66933 | 23.11453 |
| 13639 | LOC103227 | 10.14206 | 1.944173 | 0.934136 | 2.081253 | 0.037411  | 0.072921  | 3.794605 | 1.642235 | 6.957314 | 15.62489 | 27.80844 | 5.024897 |
| 22803 | PATE3     | 0.926513 | 1.943811 | 3.285015 | 0.591721 | 0.554038  | 0.645837  | 0        | 1.094824 | 0        | 4.464254 | 0        | 0        |
| 22804 | LOC119627 | 0.926513 | 1.943811 | 3.285015 | 0.591721 | 0.554038  | 0.645837  | 0        | 1.094824 | 0        | 4.464254 | 0        | 0        |
| 22805 | LGSN      | 0.926513 | 1.943811 | 3.285015 | 0.591721 | 0.554038  | 0.645837  | 0        | 1.094824 | 0        | 4.464254 | 0        | 0        |
| 15697 | LOC103215 | 5.444383 | 1.943798 | 1.131978 | 1.717169 | 0.085948  | 0.145565  | 1.084173 | 2.737059 | 2.782925 | 15.62489 | 6.417332 | 4.019918 |
| 17115 | LOC119627 | 4.075251 | 1.942622 | 1.313556 | 1.478904 | 0.139166  | 0.216619  | 1.626259 | 2.782925 | 8.928508 | 8.556443 | 2.009959 |          |
| 21812 | TRNAQ-CU  | 1.387994 | 1.942556 | 2.563125 | 0.757886 | 0.448519  | 0.546635  | 1.084173 | 0.547412 | 0        | 6.696381 | 0        | 0        |
| 21815 | METTL11B  | 1.387994 | 1.942556 | 2.563125 | 0.757886 | 0.448519  | 0.546635  | 1.084173 | 0.547412 | 0        | 6.696381 | 0        | 0        |
| 135   | LOC103237 | 10125.85 | 1.94192  | 0.084759 | 22.91111 | 3.60E-116 | 7.09E-114 | 3927.416 | 4351.377 | 4268.312 | 16002.12 | 16317.14 | 15888.73 |
| 14752 | LOC119627 | 7.380114 | 1.941718 | 1.032296 | 1.88097  | 0.059976  | 0.108084  | 1.084173 | 6.568942 | 1.391463 | 15.62489 | 8.556443 | 11.05477 |
| 21805 | LOC103237 | 1.300211 | 1.940783 | 2.556217 | 0.75924  | 0.447709  | 0.545854  | 0        | 1.642235 | 0        | 0        | 2.139111 | 4.019918 |
| 9189  | LOC103215 | 16.33213 | 1.940692 | 0.634584 | 3.058213 | 0.002227  | 0.006442  | 7.047123 | 6.02153  | 6.957314 | 26.78552 | 32.08666 | 19.09461 |
| 17465 | RS1       | 5.446629 | 1.940584 | 1.370091 | 1.416391 | 0.156661  | 0.238468  | 0.542086 | 0        | 6.261582 | 11.16063 | 10.69555 | 4.019918 |
| 6485  | LOC119615 | 29.5668  | 1.939296 | 0.491479 | 3.945839 | 7.95E-05  | 0.000326  | 15.17842 | 9.306001 | 11.82743 | 53.57105 | 51.33866 | 36.17926 |
| 3071  | LCTL      | 79.82071 | 1.938182 | 0.307191 | 6.309379 | 2.80E-10  | 2.43E-09  | 34.15144 | 30.10765 | 35.4823  | 133.9276 | 100.5382 | 144.717  |
| 10778 | LOC119627 | 25.40044 | 1.938161 | 0.724958 | 2.673482 | 0.007507  | 0.018511  | 9.757555 | 1.642235 | 20.17621 | 37.94616 | 57.75599 | 25.12449 |
| 14679 | NCF1      | 8.326788 | 1.93777  | 1.02381  | 1.892705 | 0.058397  | 0.105763  | 1.626259 | 1.094824 | 7.653045 | 11.16063 | 21.39111 | 7.034856 |
| 1199  | SPEF2     | 224.0109 | 1.937641 | 0.190864 | 10.15195 | 3.25E-24  | 7.20E-23  | 86.73382 | 102.366  | 88.35788 | 368.301  | 363.6488 | 334.6582 |
| 9555  | RGS4      | 18.14308 | 1.936806 | 0.651836 | 2.971308 | 0.002965  | 0.008251  | 4.336691 | 10.94824 | 6.957314 | 29.01765 | 38.50399 | 19.09461 |
| 21093 | LOC119615 | 1.560198 | 1.93665  | 2.235962 | 0.866137 | 0.386415  | 0.487026  | 0        | 0.547412 | 1.391463 | 0        | 6.417332 | 1.004979 |
| 4232  | GDPD3     | 58.1276  | 1.936517 | 0.372544 | 5.198095 | 2.01E-07  | 1.26E-06  | 28.73058 | 22.9913  | 20.87194 | 100.4457 | 64.17332 | 111.5527 |
| 18073 | LOC103215 | 3.99349  | 1.936276 | 1.457025 | 1.328924 | 0.183873  | 0.270473  | 0.542086 | 1.642235 | 2.782925 | 0        | 14.97377 | 4.019918 |
| 13953 | LOC119615 | 11.14938 | 1.934571 | 0.957101 | 2.021282 | 0.043251  | 0.082406  | 1.626259 | 4.379295 |          |          |          |          |



|       |           |          |          |          |          |          |          |          |          |          |          |          |          |
|-------|-----------|----------|----------|----------|----------|----------|----------|----------|----------|----------|----------|----------|----------|
| 5826  | HSD11B2   | 35.95064 | 1.933583 | 0.453825 | 4.260633 | 2.04E-05 | 9.30E-05 | 16.26259 | 10.40082 | 18.08902 | 49.10679 | 70.59065 | 51.25395 |
| 14336 | LOC119618 | 9.340919 | 1.931765 | 0.988242 | 1.954748 | 0.050613 | 0.093852 | 1.084173 | 2.189647 | 8.348776 | 24.5534  | 12.83466 | 7.034856 |
| 511   | TNIK      | 5697.431 | 1.930643 | 0.133859 | 14.42296 | 3.71E-47 | 1.93E-45 | 2095.164 | 2908.946 | 2099.717 | 8716.456 | 8793.884 | 9570.419 |
| 382   | LOC10324  | 1590.017 | 1.930332 | 0.120272 | 16.04967 | 5.75E-58 | 4.00E-56 | 615.8101 | 753.7861 | 613.6351 | 2415.161 | 2500.62  | 2641.086 |
| 16687 | DKKL1     | 4.507502 | 1.930003 | 1.249483 | 1.544641 | 0.122433 | 0.19506  | 1.626259 | 1.094824 | 2.782925 | 6.696381 | 12.83466 | 2.009959 |
| 1916  | TMEM184   | 130.9302 | 1.929523 | 0.236329 | 8.164582 | 3.23E-16 | 4.48E-15 | 50.95612 | 56.38342 | 56.35424 | 187.4987 | 220.3284 | 214.0606 |
| 19978 | LOC10322  | 2.023454 | 1.929224 | 1.866537 | 1.033584 | 0.30133  | 0.400985 | 0        | 1.094824 | 1.391463 | 2.232127 | 6.417332 | 1.004979 |
| 11688 | LOC10324  | 10.7556  | 1.929001 | 0.779865 | 2.473508 | 0.013379 | 0.030432 | 5.420864 | 3.831883 | 4.174388 | 22.32127 | 10.69555 | 18.08963 |
| 15166 | LOC11962  | 11.60026 | 1.92865  | 1.070116 | 1.802282 | 0.071501 | 0.125337 | 0.542086 | 2.737059 | 11.1317  | 20.08914 | 32.08666 | 3.014938 |
| 176   | SERPINI1  | 3106.931 | 1.928553 | 0.092106 | 20.93846 | 2.39E-97 | 3.61E-95 | 1266.314 | 1360.866 | 1250.229 | 5078.089 | 4778.773 | 4907.315 |
| 22437 | LOC11962  | 0.925625 | 1.928436 | 2.965116 | 0.650375 | 0.51545  | 0.610607 | 0.542086 | 0.547412 | 0        | 4.464254 | 0        | 0        |
| 22439 | LOC11962  | 0.925625 | 1.928436 | 2.965116 | 0.650375 | 0.51545  | 0.610607 | 0.542086 | 0.547412 | 0        | 4.464254 | 0        | 0        |
| 6947  | SLC15A3   | 53.3172  | 1.928183 | 0.513097 | 3.75793  | 0.000171 | 0.000656 | 13.55216 | 12.59047 | 40.35242 | 98.21359 | 106.9555 | 48.23901 |
| 15216 | NTN3      | 6.514401 | 1.92818  | 1.075374 | 1.793032 | 0.072968 | 0.127487 | 0.542086 | 2.737059 | 4.87012  | 8.928508 | 14.97377 | 7.034856 |
| 17126 | SHOX      | 7.078942 | 1.927201 | 1.304618 | 1.477214 | 0.139618 | 0.216732 | 0        | 0.547412 | 8.348776 | 17.85702 | 10.69555 | 5.024897 |
| 19529 | LOC11962  | 2.022567 | 1.926747 | 1.758697 | 1.095554 | 0.273274 | 0.371991 | 0.542086 | 0.547412 | 1.391463 | 2.232127 | 6.417332 | 1.004979 |
| 19530 | LOC11962  | 2.022567 | 1.926747 | 1.758697 | 1.095554 | 0.273274 | 0.371991 | 0.542086 | 0.547412 | 1.391463 | 2.232127 | 6.417332 | 1.004979 |
| 11649 | LMOD1     | 14.14927 | 1.925921 | 0.77619  | 2.48125  | 0.013092 | 0.029879 | 2.710432 | 7.116354 | 7.653045 | 17.85702 | 38.50399 | 11.05477 |
| 19952 | GPR17     | 2.005123 | 1.925786 | 1.856225 | 1.037475 | 0.299515 | 0.399088 | 0        | 0.547412 | 2.087194 | 2.232127 | 2.139111 | 5.024897 |
| 519   | BTBD16    | 1046.146 | 1.925147 | 0.133863 | 14.38143 | 6.77E-47 | 3.47E-45 | 471.0731 | 369.503  | 469.6187 | 1604.899 | 1600.055 | 1761.729 |
| 16009 | LOC11962  | 5.417625 | 1.924939 | 1.157573 | 1.662909 | 0.096331 | 0.159969 | 2.168345 | 1.642235 | 2.782925 | 8.928508 | 14.97377 | 2.009959 |
| 17033 | LOC11962  | 4.080221 | 1.924805 | 1.293329 | 1.488256 | 0.136683 | 0.213335 | 0.542086 | 1.094824 | 3.478657 | 8.928508 | 6.417332 | 4.019918 |
| 20782 | LOC10322  | 1.335464 | 1.924655 | 2.122547 | 0.906767 | 0.36453  | 0.466319 | 1.084173 | 0.547412 | 0        | 2.232127 | 2.139111 | 2.009959 |
| 15885 | SLC18A2   | 7.258282 | 1.924499 | 1.140718 | 1.687095 | 0.091585 | 0.153276 | 1.084173 | 1.642235 | 6.261582 | 11.16063 | 21.39111 | 2.009959 |
| 354   | DDX58     | 1050.316 | 1.924471 | 0.11778  | 16.33954 | 5.16E-60 | 3.88E-58 | 440.7162 | 470.2267 | 402.1327 | 1591.507 | 1739.097 | 1658.216 |
| 17412 | LOC10322  | 3.358918 | 1.92413  | 1.347856 | 1.427548 | 0.153422 | 0.234243 | 1.084173 | 1.642235 | 1.391463 | 4.464254 | 8.556443 | 3.014938 |
| 229   | MYLK      | 7642.008 | 1.923625 | 0.101142 | 19.01915 | 1.18E-80 | 1.37E-78 | 3074.172 | 3470.591 | 3022.257 | 11718.67 | 11429.27 | 13137.09 |
| 12121 | LOC11962  | 10.2841  | 1.92362  | 0.807946 | 2.380875 | 0.017272 | 0.037882 | 2.710432 | 6.568942 | 3.478657 | 15.62489 | 19.252   | 14.06971 |
| 4503  | FRMPD2    | 53.66973 | 1.923527 | 0.383963 | 5.009673 | 5.45E-07 | 3.22E-06 | 28.18849 | 19.70683 | 18.78475 | 109.3742 | 70.59065 | 75.37346 |
| 16599 | LOC11962  | 5.918631 | 1.923378 | 1.23493  | 1.557479 | 0.119357 | 0.191162 | 0        | 3.831883 | 3.478657 | 15.62489 | 8.556443 | 4.019918 |
| 316   | RB1CC1    | 4650.706 | 1.92097  | 0.112712 | 17.04318 | 3.93E-65 | 3.30E-63 | 1824.663 | 2241.651 | 1762.983 | 7234.324 | 7208.803 | 7631.814 |
| 4609  | TMEM169   | 58.24619 | 1.920212 | 0.388792 | 4.938924 | 7.86E-07 | 4.53E-06 | 16.26259 | 26.27577 | 30.61218 | 118.3027 | 70.59065 | 87.43321 |
| 19478 | KRT38     | 2.261976 | 1.919245 | 1.737798 | 1.104412 | 0.269414 | 0.367739 | 1.084173 | 1.642235 | 0        | 6.696381 | 2.139111 | 2.009959 |
| 282   | IFI30     | 1463.794 | 1.918351 | 0.10768  | 17.81523 | 5.38E-71 | 5.08E-69 | 628.2781 | 633.3555 | 576.7613 | 2287.93  | 2203.284 | 2453.155 |
| 9843  | ACAN      | 22.52178 | 1.917689 | 0.662277 | 2.895599 | 0.003784 | 0.010221 | 4.878777 | 6.02153  | 17.39328 | 31.24978 | 53.47777 | 22.10955 |
| 19938 | LOC10323  | 2.903459 | 1.917232 | 1.841956 | 1.040868 | 0.297937 | 0.397264 | 0        | 2.189647 | 1.391463 | 0        | 12.83466 | 1.004979 |
| 9380  | ETV3L     | 24.27649 | 1.916761 | 0.636248 | 3.012598 | 0.00259  | 0.007341 | 4.336691 | 9.306001 | 16.69755 | 53.57105 | 40.6431  | 21.10457 |
| 1545  | BCO1      | 290.3253 | 1.91567  | 0.210404 | 9.104731 | 8.65E-20 | 1.49E-18 | 108.9594 | 157.6546 | 97.40239 | 491.0679 | 440.6568 | 446.2109 |
| 9613  | LOC10321  | 19.81628 | 1.915573 | 0.647921 | 2.956491 | 0.003112 | 0.008605 | 9.757555 | 7.663765 | 6.957314 | 31.24978 | 49.19955 | 14.06971 |
| 19925 | MS4A13    | 2.520911 | 1.915072 | 1.835627 | 1.043279 | 0.296819 | 0.396032 | 0        | 1.094824 | 2.087194 | 8.928508 | 0        | 3.014938 |
| 19525 | RBP7      | 3.862336 | 1.915011 | 1.745685 | 1.096997 | 0.272643 | 0.371227 | 0        | 0        | 4.87012  | 4.464254 | 12.83466 | 1.004979 |
| 13115 | KCNE1     | 8.059688 | 1.914525 | 0.876146 | 2.185166 | 0.028877 | 0.058535 | 3.252518 | 2.737059 | 4.174388 | 11.16063 | 14.97377 | 12.05975 |
| 6517  | GRIP2     | 62.99931 | 1.914388 | 0.4868   | 3.932592 | 8.40E-05 | 0.000343 | 17.88885 | 18.612   | 42.43961 | 91.51721 | 158.2942 | 49.24399 |
| 3922  | ANKRD30B  | 63.34015 | 1.913085 | 0.352546 | 5.426478 | 5.75E-08 | 3.90E-07 | 19.51511 | 32.2973  | 27.82925 | 89.28508 | 117.6511 | 93.46309 |
| 20398 | TRNAH-GU  | 2.057654 | 1.912856 | 1.988821 | 0.961804 | 0.336148 | 0.438106 | 0        | 0.547412 | 2.087194 | 6.696381 | 0        | 3.014938 |
| 14720 | ZNF497    | 6.08557  | 1.912627 | 1.014481 | 1.885326 | 0.059386 | 0.107254 | 3.252518 | 2.189647 | 2.087194 | 13.39276 | 8.556443 | 7.034856 |
| 8616  | TCTE1     | 29.3199  | 1.912344 | 0.59299  | 3.224917 | 0.00126  | 0.003888 | 5.420864 | 9.306001 | 22.2634  | 46.87467 | 59.8951  | 32.15934 |
| 302   | LYN       | 1638.365 | 1.912199 | 0.109611 | 17.44529 | 3.74E-68 | 3.29E-66 | 687.3655 | 722.0362 | 656.0747 | 2491.054 | 2455.699 | 2817.962 |
| 18677 | LOC11961  | 5.509265 | 1.912156 | 1.55268  | 1.23152  | 0.218128 | 0.310486 | 0        | 0        | 6.957314 | 13.39276 | 10.69555 | 2.009959 |
| 5813  | LOC10324  | 35.05903 | 1.912095 | 0.448089 | 4.267219 | 1.98E-05 | 9.05E-05 | 12.46799 | 15.32753 | 16.00182 | 58.0353  | 66.31243 | 42.20914 |
| 1686  | ANK1      | 177.4078 | 1.911666 | 0.218338 | 8.755552 | 2.03E-18 | 3.20E-17 | 68.84497 | 88.68071 | 65.39875 | 287.9444 | 280.2235 | 273.3544 |
| 11233 | LOC10321  | 23.11104 | 1.911485 | 0.742617 | 2.573983 | 0.010054 | 0.023794 | 4.336691 | 3.284471 | 21.56767 | 40.17829 | 49.19955 | 20.09959 |
| 10283 | GUCY2C    | 14.92281 | 1.911348 | 0.684452 | 2.792523 | 0.00523  | 0.013521 | 5.420864 | 5.474118 | 7.653045 | 31.24978 | 25.66933 | 14.06971 |
| 11739 | TNNC2     | 11.47297 | 1.911256 | 0.77679  | 2.460453 | 0.013876 | 0.031425 | 4.336691 | 7.116354 | 2.782925 | 24.5534  | 14.97377 | 15.07469 |
| 15232 | LOC10323  | 8.10359  | 1.91095  | 1.067783 | 1.789643 | 0.073511 | 0.128286 | 4.336691 | 3.284471 | 2.782925 | 0        | 17.11289 | 21.10457 |
| 20299 | LOC10323  | 2.232746 | 1.910946 | 1.953299 | 0.978317 | 0.327918 | 0.42947  | 0        | 2.737059 | 0        | 2.232127 | 6.417332 | 2.009959 |
| 577   | RHPN1     | 1465.463 | 1.909965 | 0.13804  | 13.83635 | 1.54E-43 | 7.09E-42 | 651.5878 | 501.4292 | 697.1228 | 2294.627 | 2196.867 | 2451.145 |
| 255   | TNIP1     | 10788.19 | 1.909773 | 0.104521 | 18.27167 | 1.39E-74 | 1.45E-72 | 4344.28  | 5060.822 | 4201.522 | 17060.15 | 15906.43 | 18155.96 |
| 15442 | MAP3K8    | 5.146217 | 1.909456 | 1.089206 | 1.753072 | 0.07959  | 0.137022 | 1.626259 | 2.737059 | 2.087194 | 6.696381 | 10.69555 | 7.034856 |
| 19926 | LOC10323  | 2.042151 | 1.908738 | 1.830186 | 1.04292  | 0.296985 | 0.396234 | 0        | 0.547412 | 2.087194 | 4.464254 | 2.139111 | 3.014938 |
| 2473  | USP2      | 103.2191 | 1.908282 | 0.26649  | 7.160809 | 8.02E-13 | 8.62E-12 | 39.5723  | 45.43518 | 45.91827 | 165.1774 | 143.3204 | 179.8913 |
| 12874 | LOC11962  | 9.65714  | 1.908264 | 0.858255 | 2.223424 | 0.026187 | 0.054073 | 5.96295  | 3.831883 | 2.087194 | 15.62489 | 21.39111 | 9.044815 |
| 11409 | LOC11962  | 15.03442 | 1.90721  | 0.752596 | 2.534175 | 0.011271 | 0.026264 | 7.047123 | 3.284471 | 8.348776 | 37.94616 | 23.53022 | 10.04979 |
| 12071 | FAM9A     | 13.90572 | 1.907196 | 0.796755 | 2.393704 | 0.016679 | 0.036735 | 2.710432 | 4.926706 | 9.740239 | 33.4819  | 23.53022 | 9.044815 |
| 376   | MAP3K5    | 987.5286 | 1.906835 | 0.118476 | 16.09471 | 2.78E-58 | 1.96E-56 | 408.7331 | 448.8777 | 390.3053 | 1484.364 | 1565.829 | 1627.062 |
| 22937 | LOC11961  | 0.893732 | 1.905637 | 3.323925 | 0.573309 | 0.566435 | 0.656495 | 1.084173 | 0        | 0        | 0        | 4.278221 | 0        |
| 22938 | LOC10322  | 0.893732 | 1.905637 | 3.323925 | 0.573309 | 0.566435 | 0.656495 | 1.084173 | 0        | 0        | 0        | 4.278221 | 0        |
| 14451 | LOC10324  | 8.720259 | 1.905555 | 0.985143 | 1.934293 | 0.053077 | 0.097644 | 6.505036 | 2.189647 | 2.087194 | 6.696381 | 27.80844 | 7.034856 |
| 21402 | LOC10322  | 1.372492 | 1.905533 | 2.334622 | 0.816206 | 0.414382 | 0.514734 | 1.084173 | 0.547412 | 0        | 4.464254 | 2.139111 | 0        |
| 7898  | KIF26B    | 22.49165 | 1.905192 | 0.55367  | 3.441028 | 0.00058  | 0.001951 | 11.38381 | 7.663765 | 9.044508 | 37.94616 | 42.78221 | 26.12947 |
| 260   | CLU       | 23482.07 | 1.904138 | 0.104915 | 18.14938 | 1.30E-73 | 1.33E-71 | 9532.589 | 10967.4  | 9208.005 | 36528.76 | 3        |          |



|       |           |          |          |          |          |           |           |          |          |          |          |          |          |
|-------|-----------|----------|----------|----------|----------|-----------|-----------|----------|----------|----------|----------|----------|----------|
| 3879  | PLIN4     | 61.02467 | 1.902192 | 0.347815 | 5.468984 | 4.53E-08  | 3.10E-07  | 31.9831  | 21.89647 | 23.65487 | 84.82083 | 96.25998 | 107.5328 |
| 20771 | LOC119621 | 1.763999 | 1.901919 | 2.095736 | 0.907519 | 0.364133  | 0.466034  | 1.626259 | 0        | 0.695731 | 2.232127 | 0        | 6.029877 |
| 21555 | LOC119621 | 1.594398 | 1.901295 | 2.388396 | 0.796055 | 0.426     | 0.52541   | 0        | 0        | 2.087194 | 4.464254 | 0        | 3.014938 |
| 16631 | LOC119611 | 4.979976 | 1.901054 | 1.224447 | 1.552581 | 0.120523  | 0.192659  | 1.626259 | 1.094824 | 3.478657 | 6.696381 | 14.97377 | 2.009959 |
| 720   | GGT1      | 1341.908 | 1.900444 | 0.150091 | 12.66191 | 9.61E-37  | 3.55E-35  | 657.5508 | 475.1535 | 570.4997 | 2073.646 | 1854.609 | 2419.991 |
| 1684  | DENND1C   | 178.0982 | 1.900431 | 0.216635 | 8.772499 | 1.75E-18  | 2.76E-17  | 62.88202 | 84.30142 | 78.61764 | 270.0874 | 297.3364 | 275.3644 |
| 17522 | LOC103221 | 5.981964 | 1.900382 | 1.345998 | 1.411876 | 0.157986  | 0.239678  | 2.710432 | 0.547412 | 4.174388 | 15.62489 | 12.83466 | 0        |
| 19234 | S100A12   | 2.489905 | 1.900293 | 1.655619 | 1.147784 | 0.251058  | 0.347009  | 0        | 1.094824 | 2.087194 | 4.464254 | 4.278221 | 3.014938 |
| 5724  | LOC119611 | 34.56514 | 1.900264 | 0.440761 | 4.311327 | 1.62E-05  | 7.54E-05  | 11.9259  | 14.78012 | 17.39328 | 55.80317 | 49.19955 | 58.28881 |
| 18361 | TRNAE-UU  | 2.660394 | 1.900123 | 1.493987 | 1.271847 | 0.203428  | 0.294535  | 1.084173 | 1.642235 | 0.695731 | 2.232127 | 4.278221 | 6.029877 |
| 22513 | LOC103221 | 0.91101  | 1.899786 | 2.979128 | 0.637699 | 0.52367   | 0.61825   | 0        | 1.094824 | 0        | 2.232127 | 2.139111 | 0        |
| 22516 | LOC119621 | 0.91101  | 1.899786 | 2.979128 | 0.637699 | 0.52367   | 0.61825   | 0        | 1.094824 | 0        | 2.232127 | 2.139111 | 0        |
| 13429 | CA14      | 9.031914 | 1.899724 | 0.895723 | 2.120883 | 0.033932  | 0.067163  | 1.626259 | 5.474118 | 4.174388 | 15.62489 | 19.252   | 8.039836 |
| 15247 | ADCYAP1   | 11.55837 | 1.899705 | 1.061875 | 1.78901  | 0.073613  | 0.128354  | 1.626259 | 0.547412 | 12.52316 | 13.39276 | 34.22577 | 7.034856 |
| 12416 | LOC103221 | 11.77305 | 1.899169 | 0.819588 | 2.317224 | 0.020492  | 0.043876  | 7.589209 | 3.831883 | 3.478657 | 6.696381 | 29.94755 | 19.09461 |
| 20918 | LOC119621 | 1.803855 | 1.898325 | 2.135445 | 0.88896  | 0.374025  | 0.475353  | 1.626259 | 0.547412 | 0        | 2.232127 | 6.417332 | 0        |
| 9507  | GPR37L1   | 18.64427 | 1.898032 | 0.636291 | 2.98296  | 0.002855  | 0.007983  | 7.589209 | 4.926706 | 11.1317  | 22.32127 | 42.78221 | 23.11453 |
| 10113 | SLC39A5   | 18.18651 | 1.897793 | 0.669443 | 2.834883 | 0.004584  | 0.012051  | 7.589209 | 6.02153  | 9.044508 | 40.17829 | 34.22577 | 12.05975 |
| 12622 | MKRN2OS   | 9.525821 | 1.897415 | 0.833366 | 2.27681  | 0.022798  | 0.048017  | 3.794605 | 3.284471 | 4.87012  | 22.32127 | 12.83466 | 10.04979 |
| 11414 | GRIN2D    | 16.94793 | 1.896282 | 0.748473 | 2.533535 | 0.011292  | 0.026307  | 3.252518 | 10.94824 | 6.957314 | 24.5534  | 44.92132 | 11.05477 |
| 2430  | CRB3      | 127.5339 | 1.89619  | 0.262445 | 7.225095 | 5.01E-13  | 5.48E-12  | 59.6295  | 40.50847 | 62.61582 | 183.0344 | 205.3546 | 214.0606 |
| 12718 | LOC119611 | 13.20986 | 1.896057 | 0.8411   | 2.254258 | 0.02418   | 0.050544  | 1.084173 | 6.568942 | 9.044508 | 31.24978 | 19.252   | 12.05975 |
| 1632  | LOC103234 | 178.5965 | 1.896028 | 0.213131 | 8.896073 | 5.79E-19  | 9.42E-18  | 79.14461 | 71.16354 | 75.83472 | 272.3195 | 320.8666 | 252.2498 |
| 16927 | LOC119611 | 4.500164 | 1.895024 | 1.261179 | 1.502581 | 0.132947  | 0.208802  | 0.542086 | 1.094824 | 4.174388 | 4.464254 | 10.69555 | 6.029877 |
| 22955 | MS4A18    | 0.895507 | 1.894247 | 3.32184  | 0.57024  | 0.568515  | 0.658417  | 0        | 1.094824 | 0        | 0        | 4.278221 | 0        |
| 21700 | CUNH18or  | 1.631426 | 1.893086 | 2.434571 | 0.777585 | 0.436814  | 0.535147  | 0        | 0        | 2.087194 | 6.696381 | 0        | 1.004979 |
| 2350  | CDH3      | 136.161  | 1.891875 | 0.257708 | 7.341159 | 2.12E-13  | 2.40E-12  | 48.24569 | 56.93083 | 68.87741 | 245.534  | 173.268  | 224.1104 |
| 7774  | VWF       | 27.86436 | 1.891685 | 0.544962 | 3.471223 | 0.000518  | 0.001771  | 7.589209 | 10.94824 | 16.69755 | 51.33892 | 53.47777 | 27.13445 |
| 16544 | LOC103241 | 6.235985 | 1.890165 | 1.206517 | 1.566629 | 0.117202  | 0.188334  | 2.168345 | 1.642235 | 4.174388 | 0        | 21.39111 | 8.039836 |
| 20143 | APOBEC2   | 1.802802 | 1.890128 | 1.88148  | 1.004596 | 0.315091  | 0.415862  | 0.542086 | 1.094824 | 0.695731 | 4.464254 | 0        | 4.019918 |
| 15958 | PLN       | 5.203883 | 1.888603 | 1.128295 | 1.673857 | 0.094159  | 0.156864  | 2.168345 | 2.189647 | 2.087194 | 8.928508 | 12.83466 | 3.014938 |
| 3183  | BAIAP2L2  | 112.5258 | 1.888495 | 0.305521 | 6.181225 | 6.36E-10  | 5.31E-09  | 55.8349  | 30.10765 | 58.44144 | 156.2489 | 177.5462 | 196.976  |
| 14831 | LOC103241 | 8.458142 | 1.888363 | 1.011786 | 1.866366 | 0.06199   | 0.111119  | 1.626259 | 2.737059 | 6.261582 | 17.85702 | 19.252   | 3.014938 |
| 5573  | COL11A2   | 102.6725 | 1.888317 | 0.430738 | 4.383913 | 1.17E-05  | 5.56E-05  | 32.52518 | 28.46541 | 69.57314 | 169.6417 | 237.4413 | 78.3884  |
| 2566  | FOXH1     | 110.1125 | 1.886827 | 0.268465 | 7.028211 | 2.09E-12  | 2.17E-11  | 44.99317 | 52.00412 | 44.52681 | 149.5525 | 162.5724 | 207.0258 |
| 15881 | OPN1SW    | 7.635137 | 1.88673  | 1.117841 | 1.687834 | 0.091443  | 0.153077  | 3.794605 | 1.642235 | 4.174388 | 2.232127 | 29.94755 | 4.019918 |
| 10907 | TRIM71    | 17.44947 | 1.886344 | 0.711944 | 2.649567 | 0.00806   | 0.019643  | 2.710432 | 10.94824 | 8.348776 | 31.24978 | 36.36488 | 15.07469 |
| 281   | WDR91     | 11233.08 | 1.884021 | 0.105655 | 17.83178 | 4.00E-71  | 3.79E-69  | 5078.265 | 4411.044 | 4881.947 | 17147.2  | 16216.6  | 19663.43 |
| 315   | CTSF      | 1120.988 | 1.883742 | 0.110245 | 17.08692 | 1.86E-65  | 1.57E-63  | 486.7936 | 464.2052 | 484.9248 | 1725.434 | 1696.315 | 1868.257 |
| 22204 | LOC119621 | 0.910123 | 1.883547 | 2.723007 | 0.691716 | 0.489116  | 0.585699  | 0.542086 | 0.547412 | 0        | 2.232127 | 2.139111 | 0        |
| 17231 | KLRG1     | 4.330788 | 1.883481 | 1.287475 | 1.462926 | 0.143488  | 0.221381  | 1.626259 | 1.642235 | 2.087194 | 8.928508 | 10.69555 | 1.004979 |
| 14323 | LOC103231 | 7.713599 | 1.882735 | 0.961829 | 1.957452 | 0.050294  | 0.093352  | 4.336691 | 3.831883 | 1.391463 | 17.85702 | 12.83466 | 6.029877 |
| 5688  | LOC119621 | 36.13027 | 1.882622 | 0.434589 | 4.331955 | 1.48E-05  | 6.91E-05  | 13.01007 | 16.96977 | 16.69755 | 53.57105 | 49.19955 | 67.33362 |
| 13074 | LOC119611 | 9.986507 | 1.882481 | 0.858744 | 2.192133 | 0.02837   | 0.057688  | 3.252518 | 4.379295 | 4.87012  | 17.85702 | 23.53022 | 6.029877 |
| 14363 | CDHR4     | 8.18354  | 1.881961 | 0.965445 | 1.949319 | 0.051257  | 0.094864  | 1.084173 | 4.379295 | 4.87012  | 15.62489 | 17.11289 | 6.029877 |
| 4619  | MUC22     | 50.48501 | 1.881869 | 0.381207 | 4.936613 | 7.95E-07  | 4.58E-06  | 16.80468 | 27.37059 | 20.17621 | 87.05295 | 79.14709 | 72.35852 |
| 6266  | CBFA2T3   | 34.36568 | 1.881674 | 0.465359 | 4.043488 | 5.27E-05  | 0.000223  | 10.29964 | 16.96977 | 16.69755 | 69.19594 | 42.78221 | 50.24897 |
| 14888 | LOC103221 | 6.754967 | 1.881138 | 1.012907 | 1.857168 | 0.063287  | 0.11301   | 2.168345 | 1.642235 | 4.87012  | 6.696381 | 17.11289 | 8.039836 |
| 16835 | LOC119621 | 4.969443 | 1.88108  | 1.23848  | 1.518861 | 0.128797  | 0.20339   | 0.542086 | 1.642235 | 4.174388 | 4.464254 | 14.97377 | 4.019918 |
| 20118 | LOC103211 | 2.062789 | 1.880271 | 1.862391 | 1.0096   | 0.312687  | 0.413182  | 0.542086 | 0        | 2.087194 | 4.464254 | 4.278221 | 1.004979 |
| 16226 | PRPS1L1   | 5.397978 | 1.878564 | 1.158228 | 1.62193  | 0.104818  | 0.171737  | 1.084173 | 1.094824 | 4.87012  | 4.464254 | 12.83466 | 8.039836 |
| 20127 | IL19      | 2.063677 | 1.877926 | 1.862353 | 1.008362 | 0.313281  | 0.413801  | 0        | 0.547412 | 2.087194 | 4.464254 | 4.278221 | 1.004979 |
| 16566 | SMPDL3B   | 4.933528 | 1.877782 | 1.201588 | 1.562751 | 0.118111  | 0.189544  | 2.710432 | 2.737059 | 0.695731 | 4.464254 | 14.97377 | 4.019918 |
| 14569 | LOC119621 | 7.254364 | 1.877673 | 0.982069 | 1.911955 | 0.055882  | 0.101971  | 2.710432 | 1.642235 | 4.87012  | 11.16063 | 17.11289 | 6.029877 |
| 10480 | ASPHD1    | 23.21204 | 1.877628 | 0.68298  | 2.74917  | 0.005975  | 0.015156  | 7.589209 | 6.568942 | 15.30609 | 35.71403 | 62.03421 | 12.05975 |
| 7103  | LOC103211 | 27.64845 | 1.876844 | 0.507935 | 3.695045 | 0.00022   | 0.000823  | 11.9259  | 8.758589 | 15.30609 | 42.41041 | 34.22577 | 53.26391 |
| 13154 | ZFPM2     | 12.94494 | 1.876379 | 0.860786 | 2.179843 | 0.029269  | 0.059154  | 1.084173 | 3.831883 | 11.82743 | 22.32127 | 23.53022 | 15.07469 |
| 483   | ATL1      | 660.8986 | 1.875699 | 0.126733 | 14.80037 | 1.46E-49  | 8.02E-48  | 285.6795 | 268.7792 | 294.2944 | 1029.011 | 1086.668 | 1000.96  |
| 5288  | EDNRB     | 48.98731 | 1.875481 | 0.414418 | 4.525582 | 6.02E-06  | 3.03E-05  | 20.0572  | 15.32753 | 27.82925 | 55.80317 | 100.5382 | 74.36848 |
| 117   | FAM107B   | 10089.93 | 1.873369 | 0.079102 | 23.68292 | 5.41E-124 | 1.23E-121 | 4250.499 | 4409.402 | 4319.1   | 16053.46 | 16079.69 | 15427.44 |
| 493   | VCAN      | 47235.67 | 1.873007 | 0.127399 | 14.70189 | 6.27E-49  | 3.38E-47  | 18055.27 | 24611.09 | 18114.06 | 71718.24 | 71551.11 | 79364.23 |
| 500   | NPC1L1    | 982.6968 | 1.872042 | 0.127717 | 14.65776 | 1.20E-48  | 6.39E-47  | 446.6792 | 400.158  | 420.9175 | 1473.204 | 1424.648 | 1730.575 |
| 7128  | HHIPL2    | 40.74501 | 1.871308 | 0.507427 | 3.687839 | 0.000226  | 0.000844  | 13.55216 | 14.23271 | 24.3506  | 51.33892 | 104.8164 | 36.17926 |
| 4809  | LOC119621 | 43.24155 | 1.87104  | 0.389188 | 4.807546 | 1.53E-06  | 8.45E-06  | 16.80468 | 20.80165 | 18.08902 | 66.96381 | 68.45154 | 68.3386  |
| 16724 | HORMAD1   | 4.799014 | 1.870903 | 1.21646  | 1.537991 | 0.124051  | 0.197194  | 0.542086 | 2.737059 | 2.782925 | 11.16063 | 8.556443 | 3.014938 |
| 18147 | LOC119621 | 3.195931 | 1.869536 | 1.423595 | 1.31325  | 0.189099  | 0.277026  | 2.168345 | 1.094824 | 0.695731 | 8.928508 | 4.278221 | 2.009959 |
| 14936 | SLC35F4   | 6.12217  | 1.869423 | 1.011862 | 1.847508 | 0.064674  | 0.115114  | 1.626259 | 2.737059 | 3.478657 | 11.16063 | 10.69555 | 7.034856 |
| 13805 | LOC119621 | 8.841283 | 1.869137 | 0.91336  | 2.04644  | 0.040713  | 0.078403  | 4.336691 | 3.284471 | 3.478657 | 13.39276 | 23.53022 | 5.024897 |
| 20603 | LOC103231 | 2.3255   | 1.869003 | 1.99579  | 0.936473 | 0.34903   | 0.450369  | 0        | 2.189647 | 0.695731 | 8.928508 | 2.139111 | 0        |
| 186   | ASPH      | 7600.059 | 1.868544 | 0.090581 | 20.6284  | 1.53E-94  | 2.18E-92  | 3147.896 | 3520.953 | 3134.966 | 11629.38 | 11825    | 12342.15 |
| 20246 | CKKAR     | 2.048174 | 1.868127 | 1.890317 | 0.988261 | 0.32302   |           |          |          |          |          |          |          |



|       |           |          |          |          |          |          |          |          |          |          |          |          |          |
|-------|-----------|----------|----------|----------|----------|----------|----------|----------|----------|----------|----------|----------|----------|
| 21275 | TNFSF11   | 1.60042  | 1.867357 | 2.22514  | 0.839209 | 0.401352 | 0.501502 | 0        | 0        | 2.087194 | 2.232127 | 4.278221 | 1.004979 |
| 21276 | LOC119623 | 1.60042  | 1.867357 | 2.22514  | 0.839209 | 0.401352 | 0.501502 | 0        | 0        | 2.087194 | 2.232127 | 4.278221 | 1.004979 |
| 11336 | LOC103235 | 21.08241 | 1.866293 | 0.732128 | 2.549134 | 0.010799 | 0.025326 | 5.420864 | 4.379295 | 17.39328 | 22.32127 | 59.8951  | 17.08465 |
| 17697 | LOC119620 | 5.634347 | 1.866207 | 1.34694  | 1.385516 | 0.165895 | 0.249216 | 0.542086 | 6.568942 | 0        | 6.696381 | 14.97377 | 5.024897 |
| 2772  | LOC119621 | 178.6861 | 1.864798 | 0.276628 | 6.741171 | 1.57E-11 | 1.51E-10 | 92.15468 | 56.38342 | 81.40057 | 258.9267 | 372.2053 | 211.0457 |
| 16799 | LOC103214 | 4.33487  | 1.864752 | 1.222024 | 1.525953 | 0.127022 | 0.201016 | 1.084173 | 1.642235 | 2.782925 | 8.928508 | 8.556443 | 3.014938 |
| 2558  | LBH       | 106.6823 | 1.864178 | 0.264971 | 7.035395 | 1.99E-12 | 2.07E-11 | 48.24569 | 41.05589 | 48.00546 | 174.1059 | 183.9635 | 144.7517 |
| 12617 | LOC103231 | 17.98792 | 1.864173 | 0.818084 | 2.278706 | 0.022685 | 0.047798 | 1.084173 | 14.23271 | 7.653045 | 31.24978 | 40.6431  | 13.06473 |
| 15918 | LOC103241 | 6.352039 | 1.863703 | 1.108269 | 1.681634 | 0.09264  | 0.15472  | 1.084173 | 2.189647 | 4.87012  | 6.696381 | 19.252   | 4.019918 |
| 17407 | LOC119620 | 4.577414 | 1.863186 | 1.304366 | 1.428422 | 0.15317  | 0.233904 | 0.542086 | 0.547412 | 4.87012  | 8.928508 | 8.556443 | 4.019918 |
| 6332  | PRR36     | 41.92149 | 1.862903 | 0.464343 | 4.011913 | 6.02E-05 | 0.000253 | 9.215468 | 21.89647 | 22.95914 | 69.19594 | 77.00798 | 51.25395 |
| 16636 | LOC119621 | 4.731513 | 1.861605 | 1.199624 | 1.551824 | 0.120704 | 0.19289  | 2.168345 | 0.547412 | 3.478657 | 4.464254 | 10.69555 | 7.034856 |
| 15855 | LOC103241 | 8.360014 | 1.860843 | 1.101058 | 1.690005 | 0.091018 | 0.152616 | 4.878777 | 4.926706 | 0.695731 | 6.696381 | 29.94755 | 3.014938 |
| 7645  | VILL      | 25.17046 | 1.8608   | 0.530008 | 3.510892 | 0.000447 | 0.001553 | 8.673382 | 8.758589 | 15.30609 | 46.87467 | 34.22577 | 37.18424 |
| 21471 | LOC119615 | 1.324931 | 1.859939 | 2.302557 | 0.807771 | 0.419223 | 0.51918  | 0        | 1.094824 | 0.695731 | 0        | 2.139111 | 4.019918 |
| 15522 | SHOC1     | 6.385352 | 1.859196 | 1.069276 | 1.738742 | 0.08208  | 0.140581 | 1.626259 | 1.094824 | 5.565851 | 11.16063 | 12.83466 | 6.029877 |
| 499   | TMEM63C   | 622.8145 | 1.858467 | 0.126752 | 1.466221 | 1.13E-48 | 6.00E-47 | 277.5482 | 264.3999 | 266.4651 | 937.4933 | 983.9909 | 1006.989 |
| 7197  | LOC119621 | 26.12036 | 1.857246 | 0.506237 | 3.668728 | 0.000244 | 0.000901 | 13.55216 | 9.853413 | 10.43597 | 33.4819  | 49.19955 | 40.19918 |
| 10846 | LOC103241 | 19.04884 | 1.856871 | 0.69771  | 2.661378 | 0.007782 | 0.019075 | 4.878777 | 7.663765 | 11.82743 | 44.64254 | 34.22577 | 11.05477 |
| 12021 | LOC103235 | 13.65626 | 1.856809 | 0.772801 | 2.402699 | 0.016275 | 0.035992 | 2.710432 | 7.116354 | 7.653045 | 22.32127 | 32.08666 | 10.04979 |
| 19241 | LOC119620 | 2.702392 | 1.855541 | 1.619597 | 1.14568  | 0.251927 | 0.348048 | 0        | 2.189647 | 1.391463 | 4.464254 | 2.139111 | 6.029877 |
| 16632 | KCNA5     | 12.60795 | 1.855491 | 1.195241 | 1.5524   | 0.120567 | 0.192717 | 0        | 1.094824 | 15.30609 | 17.85702 | 36.36488 | 5.024897 |
| 10401 | LOC119621 | 17.09444 | 1.8549   | 0.670584 | 2.766098 | 0.005673 | 0.014501 | 5.96295  | 6.568942 | 9.740239 | 13.39276 | 42.78221 | 24.11951 |
| 17254 | LOC119620 | 5.16754  | 1.854308 | 1.272509 | 1.457206 | 0.145059 | 0.223508 | 2.710432 | 3.831883 | 0        | 4.464254 | 14.97377 | 5.024897 |
| 11842 | LOC119624 | 12.62066 | 1.854291 | 0.760327 | 2.438807 | 0.014736 | 0.033082 | 4.336691 | 7.663765 | 4.174388 | 13.39276 | 32.08666 | 14.06971 |
| 10856 | LOC103221 | 13.04779 | 1.853207 | 0.696771 | 2.659707 | 0.007821 | 0.019152 | 5.96295  | 4.926706 | 6.261582 | 15.62489 | 21.39111 | 24.11951 |
| 19313 | LOC103221 | 3.013134 | 1.853075 | 1.636696 | 1.132205 | 0.257548 | 0.354432 | 1.084173 | 0        | 2.782925 | 8.928508 | 4.278221 | 1.004979 |
| 2985  | CD274     | 84.00336 | 1.852091 | 0.287432 | 6.443571 | 1.17E-10 | 1.04E-09 | 36.31979 | 39.96106 | 32.69937 | 127.2312 | 141.1813 | 126.6274 |
| 11647 | LEXM      | 11.82384 | 1.850636 | 0.74562  | 2.482009 | 0.013064 | 0.02982  | 6.505036 | 3.831883 | 4.87012  | 24.5534  | 17.11289 | 14.06971 |
| 21840 | LOC119620 | 1.584918 | 1.850245 | 2.452987 | 0.754282 | 0.45068  | 0.54857  | 0        | 0        | 2.087194 | 0        | 6.417332 | 1.004979 |
| 21841 | LOC119618 | 1.584918 | 1.850245 | 2.452987 | 0.754282 | 0.45068  | 0.54857  | 0        | 0        | 2.087194 | 0        | 6.417332 | 1.004979 |
| 9358  | GREM2     | 25.73693 | 1.850027 | 0.613314 | 3.016443 | 0.002558 | 0.007266 | 8.131296 | 7.116354 | 18.08902 | 37.94616 | 62.03421 | 21.10457 |
| 14905 | PDCD1     | 6.577366 | 1.849692 | 0.998035 | 1.853333 | 0.063835 | 0.113857 | 2.710432 | 1.642235 | 4.174388 | 8.928508 | 14.97377 | 7.034856 |
| 17453 | LOC119624 | 3.874809 | 1.848823 | 1.303782 | 1.418046 | 0.156177 | 0.237888 | 1.084173 | 0.547412 | 3.478657 | 6.696381 | 6.417332 | 5.024897 |
| 19886 | TNFSF18   | 1.824327 | 1.848524 | 1.764309 | 1.047733 | 0.294762 | 0.395012 | 0.542086 | 1.094824 | 0.695731 | 4.464254 | 2.139111 | 2.009959 |
| 16904 | BEST2     | 6.394037 | 1.848421 | 1.227659 | 1.505647 | 0.132158 | 0.207845 | 0        | 2.737059 | 5.565851 | 8.928508 | 17.11289 | 4.019918 |
| 15444 | LOC103218 | 6.370075 | 1.847968 | 1.054328 | 1.752745 | 0.079646 | 0.137101 | 4.336691 | 1.642235 | 2.087194 | 11.16063 | 14.97377 | 4.019918 |
| 18957 | LOC103241 | 3.447161 | 1.847943 | 1.548061 | 1.193715 | 0.23259  | 0.32618  | 0        | 1.642235 | 2.782925 | 6.696381 | 8.556443 | 1.004979 |
| 1011  | ROR1      | 464.5478 | 1.847917 | 0.168792 | 10.9479  | 6.80E-28 | 1.79E-26 | 169.673  | 240.8612 | 196.1962 | 705.3521 | 697.3501 | 777.8541 |
| 15189 | MHC-DRA   | 7.130016 | 1.847753 | 1.027772 | 1.797824 | 0.072205 | 0.126379 | 1.084173 | 3.284471 | 4.87012  | 20.08914 | 6.417332 | 7.034856 |
| 20237 | LOC103235 | 3.016555 | 1.846957 | 1.866219 | 0.989678 | 0.322331 | 0.423441 | 3.794605 | 0        | 0        | 11.16063 | 2.139111 | 1.004979 |
| 5195  | LOC119621 | 46.86695 | 1.846621 | 0.403304 | 4.581729 | 4.61E-06 | 2.36E-05 | 18.97302 | 16.42235 | 26.43779 | 55.80317 | 79.14709 | 84.41828 |
| 15016 | LOC103235 | 7.094101 | 1.846186 | 1.008528 | 1.830576 | 0.067164 | 0.11891  | 3.252518 | 4.379295 | 1.391463 | 20.08914 | 6.417332 | 7.034856 |
| 14548 | MYLPF     | 7.509901 | 1.846018 | 0.963075 | 1.916796 | 0.055264 | 0.100989 | 2.710432 | 2.737059 | 4.174388 | 11.16063 | 19.252   | 5.024897 |
| 6399  | LOC103241 | 38.56486 | 1.845233 | 0.463603 | 3.980196 | 6.89E-05 | 0.000286 | 11.38381 | 25.72836 | 13.2189  | 53.57105 | 64.17332 | 63.31371 |
| 19223 | UPK2      | 2.946876 | 1.845211 | 1.603978 | 1.150397 | 0.249981 | 0.345718 | 0        | 1.094824 | 2.782925 | 2.232127 | 8.556443 | 3.014938 |
| 16104 | EMILIN3   | 5.666356 | 1.844776 | 1.120582 | 1.646266 | 0.099709 | 0.164603 | 2.710432 | 0.547412 | 4.174388 | 6.696381 | 12.83466 | 7.034856 |
| 17508 | TEX13D    | 3.822338 | 1.843228 | 1.304174 | 1.41333  | 0.157559 | 0.23947  | 2.168345 | 2.189647 | 0.695731 | 6.696381 | 2.139111 | 9.044815 |
| 512   | GRK5      | 1013.423 | 1.842792 | 0.127795 | 14.41995 | 3.88E-47 | 2.01E-45 | 453.1842 | 477.8905 | 395.1754 | 1584.81  | 1461.013 | 1708.465 |
| 11835 | DLL4      | 12.55719 | 1.842058 | 0.75471  | 2.44075  | 0.014657 | 0.032924 | 5.96295  | 3.284471 | 6.957314 | 24.5534  | 23.53022 | 11.05477 |
| 19933 | GPR25     | 1.807937 | 1.840853 | 1.767261 | 1.041642 | 0.297578 | 0.396865 | 1.084173 | 0.547412 | 0.695731 | 2.232127 | 4.278221 | 2.009959 |
| 19934 | LOC103231 | 1.807937 | 1.840853 | 1.767261 | 1.041642 | 0.297578 | 0.396865 | 1.084173 | 0.547412 | 0.695731 | 2.232127 | 4.278221 | 2.009959 |
| 1170  | FUCA2     | 294.7352 | 1.840275 | 0.17923  | 10.26768 | 9.85E-25 | 2.24E-23 | 115.4644 | 143.9693 | 127.3188 | 412.9435 | 481.2999 | 487.415  |
| 7409  | OTOG      | 46.59127 | 1.840203 | 0.511577 | 3.597118 | 0.000322 | 0.001154 | 15.7205  | 16.42235 | 28.52499 | 51.33892 | 128.3466 | 39.1942  |
| 14326 | CUNH2orf6 | 8.028883 | 1.840129 | 0.940336 | 1.956885 | 0.050361 | 0.093456 | 2.710432 | 2.737059 | 4.87012  | 12.97377 | 5.024897 |          |
| 17360 | LOC103215 | 4.291557 | 1.839969 | 1.279888 | 1.437602 | 0.150547 | 0.230547 | 1.084173 | 1.094824 | 3.478657 | 2.232127 | 12.83466 | 5.024897 |
| 14179 | SLFN11    | 9.56818  | 1.83972  | 0.929125 | 1.980056 | 0.047697 | 0.089425 | 2.168345 | 3.284471 | 6.957314 | 11.16063 | 27.80844 | 6.029877 |
| 16642 | LOC119621 | 5.235218 | 1.839653 | 1.186808 | 1.550084 | 0.121121 | 0.193475 | 4.878777 | 1.094824 | 0.695731 | 11.16063 | 8.556443 | 5.024897 |
| 602   | MAP2      | 3523.869 | 1.839419 | 0.135466 | 13.57849 | 5.37E-42 | 2.37E-40 | 1371.479 | 1898.972 | 1346.24  | 5526.746 | 5497.514 | 5502.263 |
| 12091 | LOC119621 | 11.16181 | 1.839018 | 0.769889 | 2.38868  | 0.016909 | 0.037179 | 4.878777 | 6.02153  | 3.478657 | 24.5534  | 14.97377 | 13.06473 |
| 18089 | LOC119624 | 3.170783 | 1.83876  | 1.388417 | 1.324357 | 0.185384 | 0.272455 | 0.542086 | 2.189647 | 1.391463 | 4.464254 | 6.417332 | 4.019918 |
| 20659 | CHRNA     | 1.361071 | 1.838747 | 1.983095 | 0.927211 | 0.353817 | 0.455265 | 0.542086 | 0.547412 | 0.695731 | 2.232127 | 2.139111 | 2.009959 |
| 20660 | LOC119620 | 1.361071 | 1.838747 | 1.983095 | 0.927211 | 0.353817 | 0.455265 | 0.542086 | 0.547412 | 0.695731 | 2.232127 | 2.139111 | 2.009959 |
| 15683 | LOC103231 | 6.56417  | 1.838292 | 1.068882 | 1.719826 | 0.085464 | 0.144874 | 3.252518 | 0.547412 | 4.87012  | 6.696381 | 14.97377 | 9.044815 |
| 16272 | LOC103241 | 7.253806 | 1.838272 | 1.139523 | 1.613194 | 0.106702 | 0.174318 | 5.96295  | 0        | 3.478657 | 8.928508 | 17.11289 | 8.039836 |
| 7341  | CPLX2     | 67.09548 | 1.836836 | 0.507593 | 3.618717 | 0.000296 | 0.001072 | 18.97302 | 15.32753 | 53.57132 | 113.8385 | 147.5986 | 53.26391 |
| 4800  | PRSS36    | 52.76399 | 1.836629 | 0.381625 | 4.81266  | 1.49E-06 | 8.25E-06 | 26.02015 | 17.51718 | 26.43779 | 66.96381 | 79.14709 | 100.4979 |
| 14267 | KRT16     | 11.40832 | 1.83604  | 0.933493 | 1.966849 | 0.049201 | 0.09168  | 1.626259 | 1.642235 | 11.82743 | 15.62489 | 25.66933 | 12.05975 |
| 2651  | CABP1     | 109.9857 | 1.835988 | 0.266333 | 6.893566 | 5.44E-12 | 5.46E-11 | 41.74065 | 49.81448 | 52.17985 | 187.4987 | 183.9635 | 144.717  |
| 12166 | LOC119621 | 12.85745 | 1.835916 | 0.773731 | 2.37281  | 0.017653 | 0.038576 | 5.420864 | 3.831883 | 7.653045 | 8.928508 | 34.22577 | 17.08465 |
| 6512  |           |          |          |          |          |          |          |          |          |          |          |          |          |



|       |           |          |          |          |          |          |          |          |          |          |          |          |          |
|-------|-----------|----------|----------|----------|----------|----------|----------|----------|----------|----------|----------|----------|----------|
| 20759 | LOC119624 | 2.262601 | 1.831942 | 2.013014 | 0.910049 | 0.362797 | 0.464615 | 0.542086 | 1.642235 | 0.695731 | 0        | 10.69555 | 0        |
| 537   | LOC103225 | 760.4261 | 1.83167  | 0.12875  | 14.22661 | 6.26E-46 | 3.10E-44 | 309.5313 | 367.3133 | 324.2108 | 1129.456 | 1215.015 | 1217.03  |
| 15493 | LOC103247 | 7.103484 | 1.831288 | 1.048811 | 1.746061 | 0.0808   | 0.138648 | 4.878777 | 2.737059 | 1.391463 | 15.62489 | 14.97377 | 3.014938 |
| 10056 | RBFOX3    | 21.58193 | 1.829652 | 0.641934 | 2.850217 | 0.004369 | 0.01155  | 8.673382 | 8.758589 | 10.43597 | 44.64254 | 44.92132 | 12.05975 |
| 2029  | LOC119624 | 137.2669 | 1.829508 | 0.231159 | 7.914505 | 2.48E-15 | 3.25E-14 | 56.37698 | 64.04718 | 60.52863 | 229.9091 | 194.6591 | 218.0805 |
| 22226 | LOC119624 | 0.913317 | 1.829488 | 2.660748 | 0.687584 | 0.491715 | 0.588124 | 0.542086 | 0        | 0.695731 | 2.232127 | 0        | 2.009959 |
| 22227 | LOC119624 | 0.913317 | 1.829488 | 2.660748 | 0.687584 | 0.491715 | 0.588124 | 0.542086 | 0        | 0.695731 | 2.232127 | 0        | 2.009959 |
| 7592  | LOC103235 | 30.38789 | 1.829093 | 0.518392 | 3.528395 | 0.000418 | 0.001464 | 10.29964 | 12.59047 | 16.69755 | 53.57105 | 62.03421 | 27.13445 |
| 423   | KCNMA1    | 3630.655 | 1.826678 | 0.11874  | 15.38388 | 2.10E-53 | 1.32E-51 | 1517.842 | 1837.114 | 1436.685 | 5459.783 | 5399.115 | 6133.39  |
| 11124 | GPA33     | 13.77685 | 1.826658 | 0.703271 | 2.597375 | 0.009394 | 0.02245  | 7.047123 | 5.474118 | 5.565851 | 13.39276 | 32.08666 | 19.09461 |
| 9797  | EMILIN1   | 24.92309 | 1.826445 | 0.6287   | 2.905115 | 0.003671 | 0.009962 | 10.29964 | 4.379295 | 18.08902 | 40.17829 | 53.47777 | 23.11453 |
| 11280 | LOC103225 | 16.25201 | 1.826109 | 0.712818 | 2.561816 | 0.010413 | 0.024541 | 3.252518 | 8.211177 | 9.740239 | 29.01765 | 34.22577 | 13.06473 |
| 21130 | LOC103216 | 1.345568 | 1.824952 | 2.120411 | 0.86066  | 0.389426 | 0.489961 | 0.542086 | 0.547412 | 0.695731 | 0        | 4.278221 | 2.009959 |
| 12801 | LOC103247 | 11.12557 | 1.824034 | 0.814532 | 2.239365 | 0.025132 | 0.052194 | 5.96295  | 4.926706 | 3.478657 | 13.39276 | 29.94755 | 9.044815 |
| 11744 | GRIK3     | 15.64559 | 1.823609 | 0.741425 | 2.459599 | 0.013909 | 0.031486 | 7.589209 | 3.284471 | 9.740239 | 13.39276 | 42.78221 | 17.08465 |
| 378   | APOE      | 17562.67 | 1.822813 | 0.113343 | 16.08226 | 3.40E-58 | 2.39E-56 | 8161.11  | 6704.7   | 8358.517 | 28928.37 | 24678.92 | 28544.43 |
| 19962 | LOC103225 | 3.657812 | 1.822778 | 1.759524 | 1.035949 | 0.300226 | 0.399815 | 0        | 0        | 4.87012  | 2.232127 | 12.83466 | 2.009959 |
| 19963 | SERPIND1  | 3.657812 | 1.822778 | 1.759524 | 1.035949 | 0.300226 | 0.399815 | 0        | 0        | 4.87012  | 2.232127 | 12.83466 | 2.009959 |
| 10344 | PRKAG3    | 17.09309 | 1.822415 | 0.655967 | 2.778212 | 0.005466 | 0.014048 | 9.215468 | 6.02153  | 6.957314 | 26.78552 | 38.50399 | 15.07469 |
| 15857 | HAND2     | 5.883445 | 1.822227 | 1.078415 | 1.689726 | 0.09108  | 0.1527   | 1.626259 | 3.284471 | 2.782925 | 4.464254 | 17.11289 | 6.029877 |
| 13701 | LOC119623 | 7.967299 | 1.821243 | 0.880679 | 2.067999 | 0.03864  | 0.074976 | 3.794605 | 3.284471 | 3.478657 | 15.62489 | 8.556443 | 13.06473 |
| 5168  | WDR64     | 43.50196 | 1.820969 | 0.396296 | 4.594976 | 4.33E-06 | 2.23E-05 | 18.97302 | 19.70683 | 18.78475 | 55.80317 | 83.42532 | 64.31869 |
| 856   | ZBTB46    | 413.308  | 1.818466 | 0.154837 | 11.74439 | 7.55E-32 | 2.34E-30 | 203.2824 | 163.6761 | 180.8902 | 654.0132 | 626.7594 | 651.2267 |
| 9162  | PIK3R5    | 23.3533  | 1.818026 | 0.593511 | 3.063173 | 0.00219  | 0.006355 | 7.589209 | 10.40082 | 12.52316 | 40.17829 | 51.33866 | 18.08963 |
| 2314  | ANXA9     | 120.8052 | 1.81766  | 0.245908 | 7.391641 | 1.45E-13 | 1.67E-12 | 58.54533 | 49.81448 | 52.17985 | 169.6417 | 194.6591 | 199.9909 |
| 14915 | LOC103235 | 8.401386 | 1.817597 | 0.981864 | 1.85117  | 0.064145 | 0.114334 | 3.794605 | 6.568942 | 0.695731 | 17.85702 | 6.417332 | 15.07469 |
| 20878 | LOC103217 | 2.088397 | 1.816858 | 2.033108 | 0.893636 | 0.371517 | 0.473071 | 0        | 0        | 2.782925 | 4.464254 | 4.278221 | 1.004979 |
| 14853 | LOC119623 | 6.884381 | 1.816326 | 0.975565 | 1.86182  | 0.062628 | 0.112097 | 1.626259 | 3.284471 | 4.174388 | 15.62489 | 8.556443 | 8.039836 |
| 10816 | SIGLEC10  | 18.19828 | 1.814638 | 0.680511 | 2.666583 | 0.007663 | 0.018834 | 5.96295  | 8.211177 | 9.740239 | 17.85702 | 51.33866 | 16.07967 |
| 9248  | CAPN12    | 29.6153  | 1.814391 | 0.596244 | 3.043037 | 0.002342 | 0.006733 | 8.131296 | 7.663765 | 23.65487 | 33.4819  | 70.59065 | 34.1693  |
| 219   | SPARC     | 9419.01  | 1.813581 | 0.093218 | 19.45525 | 2.63E-84 | 3.19E-82 | 4112.267 | 4310.321 | 4097.162 | 14466.41 | 13609.02 | 15918.87 |
| 9308  | CPNE9     | 19.9662  | 1.813559 | 0.59833  | 3.031035 | 0.002437 | 0.006959 | 7.047123 | 8.758589 | 10.43597 | 44.64254 | 27.80844 | 21.10457 |
| 15934 | LOC119618 | 5.455276 | 1.812784 | 1.080038 | 1.678444 | 0.09326  | 0.155959 | 1.084173 | 2.737059 | 3.478657 | 6.696381 | 10.69555 | 8.039836 |
| 18411 | LOC119626 | 3.175918 | 1.812737 | 1.434528 | 1.263648 | 0.206357 | 0.297793 | 1.084173 | 1.642235 | 1.391463 | 2.232127 | 10.69555 | 2.009959 |
| 3637  | LOC103247 | 99.44433 | 1.812337 | 0.31764  | 5.705632 | 1.16E-08 | 8.47E-08 | 42.28274 | 35.58177 | 53.57132 | 165.1774 | 192.52   | 107.5328 |
| 12764 | LOC103235 | 10.4073  | 1.812163 | 0.806189 | 2.247813 | 0.024588 | 0.051214 | 4.878777 | 6.02153  | 2.782925 | 11.16063 | 23.53022 | 14.06971 |
| 12584 | SLC44A4   | 13.10595 | 1.812157 | 0.792418 | 2.286872 | 0.022203 | 0.046907 | 2.710432 | 5.474118 | 9.044508 | 24.5534  | 27.80844 | 9.044815 |
| 16384 | LOC103234 | 5.540753 | 1.812069 | 1.138655 | 1.591412 | 0.111517 | 0.18095  | 1.626259 | 2.737059 | 2.782925 | 13.39276 | 10.69555 | 2.009959 |
| 10112 | LHFPL5    | 17.67188 | 1.811305 | 0.638916 | 2.834963 | 0.004583 | 0.012049 | 8.673382 | 5.474118 | 9.044508 | 37.94616 | 27.80844 | 17.08465 |
| 17549 | LOC119625 | 3.641482 | 1.811136 | 1.286256 | 1.408068 | 0.159111 | 0.241038 | 1.626259 | 1.094824 | 2.087194 | 4.464254 | 8.556443 | 4.019918 |
| 15464 | MBD3L1    | 6.78623  | 1.81019  | 1.034001 | 1.750666 | 0.080003 | 0.137538 | 1.084173 | 3.831883 | 4.174388 | 4.464254 | 17.11289 | 10.04979 |
| 12385 | SLC4A10   | 10.69971 | 1.809986 | 0.778215 | 2.325819 | 0.020028 | 0.042988 | 5.96295  | 3.284471 | 4.87012  | 15.62489 | 21.39111 | 13.06473 |
| 2309  | CDKN2D    | 138.3102 | 1.809242 | 0.24432  | 7.405209 | 1.31E-13 | 1.51E-12 | 56.37698 | 73.90059 | 53.57132 | 198.6593 | 235.3022 | 212.0507 |
| 11843 | LOC119625 | 15.99673 | 1.806519 | 0.740757 | 2.438746 | 0.014738 | 0.033082 | 2.168345 | 9.306001 | 9.740239 | 22.32127 | 36.36488 | 16.07967 |
| 728   | FRK       | 1163.524 | 1.806504 | 0.143197 | 12.61553 | 1.73E-36 | 6.33E-35 | 473.7835 | 621.8598 | 456.3998 | 1854.898 | 1672.785 | 1901.421 |
| 4095  | FAM240B   | 65.83154 | 1.805079 | 0.340574 | 5.300103 | 1.16E-07 | 7.51E-07 | 29.27266 | 22.9913  | 35.4823  | 120.5349 | 96.25998 | 90.44815 |
| 9718  | LOC119625 | 19.03093 | 1.804023 | 0.61675  | 2.925049 | 0.003444 | 0.009422 | 4.878777 | 9.306001 | 11.1317  | 37.94616 | 27.80844 | 23.11453 |
| 4247  | ZNF233    | 63.28752 | 1.80401  | 0.34761  | 5.189747 | 2.11E-07 | 1.32E-06 | 22.76763 | 35.58177 | 26.43779 | 82.5887  | 104.8164 | 107.5328 |
| 19658 | LOC119625 | 4.145788 | 1.803793 | 1.674903 | 1.076953 | 0.281501 | 0.380695 | 0        | 0        | 5.565851 | 4.464254 | 12.83466 | 2.009959 |
| 22300 | LOC119624 | 0.898702 | 1.803644 | 2.672944 | 0.674778 | 0.499817 | 0.595858 | 0        | 0.547412 | 0.695731 | 0        | 2.139111 | 2.009959 |
| 18832 | LOC103225 | 3.612252 | 1.801031 | 1.483753 | 1.213835 | 0.224811 | 0.317364 | 0.542086 | 2.189647 | 2.087194 | 0        | 12.83466 | 4.019918 |
| 10184 | THSD7A    | 28.22127 | 1.800205 | 0.638671 | 2.818672 | 0.004822 | 0.012588 | 7.047123 | 11.49565 | 18.78475 | 58.0353  | 59.8951  | 14.06971 |
| 16794 | LOC103215 | 4.576324 | 1.799976 | 1.178698 | 1.527089 | 0.126739 | 0.200629 | 2.168345 | 1.094824 | 2.782925 | 6.696381 | 10.69555 | 4.019918 |
| 20447 | PIK3CG    | 2.502317 | 1.798714 | 1.884236 | 0.954612 | 0.339774 | 0.441749 | 0        | 0        | 3.478657 | 2.232127 | 4.278221 | 5.024897 |
| 14371 | LOC103235 | 8.949214 | 1.798139 | 0.922691 | 1.948798 | 0.05132  | 0.09493  | 2.710432 | 1.642235 | 7.653045 | 13.39276 | 19.252   | 9.044815 |
| 20612 | LOC119625 | 2.334717 | 1.798116 | 1.923062 | 0.935027 | 0.349774 | 0.451133 | 0        | 1.642235 | 1.391463 | 6.696381 | 4.278221 | 0        |
| 15365 | LOC103215 | 6.199218 | 1.797915 | 1.017735 | 1.766585 | 0.077298 | 0.133734 | 2.710432 | 3.284471 | 2.087194 | 13.39276 | 10.69555 | 5.024897 |
| 9280  | BIK       | 18.25592 | 1.797452 | 0.591773 | 3.037403 | 0.002386 | 0.006836 | 9.215468 | 8.211177 | 6.957314 | 33.4819  | 23.53022 | 28.13943 |
| 15563 | TRNAL-UA  | 5.873505 | 1.796573 | 1.035968 | 1.734197 | 0.082883 | 0.141582 | 3.252518 | 3.284471 | 1.391463 | 6.696381 | 8.556443 | 12.05975 |
| 18138 | CD1D      | 3.66212  | 1.796045 | 1.365944 | 1.314874 | 0.188552 | 0.276362 | 2.168345 | 0.547412 | 2.087194 | 4.464254 | 10.69555 | 2.009959 |
| 3086  | TSPAN1    | 120.4764 | 1.795796 | 0.285264 | 6.295211 | 3.07E-10 | 2.64E-09 | 62.88202 | 36.12918 | 63.31155 | 185.2665 | 173.268  | 202.0009 |
| 19931 | LOC103225 | 3.270447 | 1.795788 | 1.723453 | 1.041971 | 0.297425 | 0.396721 | 0        | 2.189647 | 2.087194 | 8.928508 | 6.417332 | 0        |
| 15079 | LOC103225 | 7.726207 | 1.795579 | 0.986423 | 1.820294 | 0.068714 | 0.121154 | 2.168345 | 3.284471 | 4.87012  | 4.464254 | 23.53022 | 8.039836 |
| 265   | KIFC2     | 2479.265 | 1.795485 | 0.09939  | 18.06498 | 6.01E-73 | 6.03E-71 | 1095.014 | 1083.328 | 1150.74  | 3966.49  | 3553.063 | 4026.953 |
| 2711  | RASGRF1   | 115.6399 | 1.795264 | 0.263174 | 6.82159  | 9.00E-12 | 8.83E-11 | 48.24569 | 59.66789 | 46.614   | 212.0521 | 160.4333 | 166.8266 |
| 18740 | KRT32     | 3.905551 | 1.795056 | 1.464203 | 1.225961 | 0.220213 | 0.3124   | 1.084173 | 0        | 4.174388 | 4.464254 | 10.69555 | 3.014938 |
| 3518  | KALRN     | 151.8925 | 1.794712 | 0.307282 | 5.840597 | 5.20E-09 | 3.93E-08 | 48.24569 | 61.31012 | 93.92374 | 232.1412 | 305.8928 | 169.8415 |
| 698   | HIF1A     | 45414.03 | 1.794095 | 0.139749 | 12.83798 | 1.00E-37 | 3.83E-36 | 17601.54 | 25791.31 | 17592.26 | 70740.57 | 69561.74 | 71196.77 |
| 9774  | ABCA12    | 26.83062 | 1.793157 | 0.616163 | 2.9102   | 0.003612 | 0.009824 | 5.420864 | 19.70683 | 10.43597 | 42.41041 | 59.8951  | 23.11453 |
| 20431 | LEUTX     | 1.84816  | 1.79295  | 1.872893 | 0.957316 | 0.338408 | 0.440339 | 1.084173 | 0        | 1.391463 | 4.464254 | 2.139111 | 2.009959 |
| 12715 | TEX29     | 10.71431 | 1.792602 |          |          |          |          |          |          |          |          |          |          |



|       |           |          |          |          |          |          |          |          |          |          |          |          |          |
|-------|-----------|----------|----------|----------|----------|----------|----------|----------|----------|----------|----------|----------|----------|
| 684   | CAPS      | 873.6729 | 1.789897 | 0.138833 | 12.89241 | 4.97E-38 | 1.93E-36 | 437.4637 | 338.8479 | 401.437  | 1265.616 | 1328.388 | 1470.285 |
| 10486 | LOC119621 | 20.45809 | 1.789863 | 0.651348 | 2.747936 | 0.005997 | 0.015205 | 4.336691 | 10.40082 | 12.52316 | 33.4819  | 44.92132 | 17.08465 |
| 18394 | LOC103221 | 2.954379 | 1.789255 | 1.413805 | 1.26556  | 0.205671 | 0.297257 | 2.168345 | 1.094824 | 0.695731 | 4.464254 | 4.278221 | 5.024897 |
| 10251 | COL17A1   | 25.86233 | 1.788995 | 0.638544 | 2.80168  | 0.005084 | 0.013184 | 9.757555 | 8.758589 | 16.00182 | 24.5534  | 77.00798 | 19.09461 |
| 9224  | FREM1     | 21.59266 | 1.788774 | 0.586649 | 3.049141 | 0.002295 | 0.006614 | 7.047123 | 9.853413 | 11.82743 | 37.94616 | 42.78221 | 20.09959 |
| 681   | LOC103221 | 1200.54  | 1.788715 | 0.13864  | 12.90184 | 4.39E-38 | 1.71E-36 | 583.827  | 454.8992 | 580.9357 | 1770.077 | 1741.236 | 2072.268 |
| 2694  | BAIAP3    | 145.6843 | 1.788526 | 0.261288 | 6.845036 | 7.65E-12 | 7.54E-11 | 71.5554  | 45.98259 | 79.31338 | 236.6055 | 207.4937 | 233.1552 |
| 1386  | VAV1      | 222.5286 | 1.788146 | 0.186379 | 9.594117 | 8.46E-22 | 1.62E-20 | 94.32303 | 106.7453 | 98.79385 | 330.3548 | 357.2315 | 347.7229 |
| 4266  | IL22RA1   | 66.17166 | 1.78751  | 0.3452   | 5.178186 | 2.24E-07 | 1.40E-06 | 27.10432 | 27.37059 | 35.4823  | 111.6063 | 74.86887 | 120.5975 |
| 15153 | LOC119621 | 9.40441  | 1.787423 | 0.990058 | 1.805373 | 0.071016 | 0.124594 | 3.794605 | 0.547412 | 8.348776 | 11.16063 | 23.53022 | 9.044815 |
| 435   | GCNT1     | 982.2508 | 1.786732 | 0.117015 | 15.26927 | 1.23E-52 | 7.49E-51 | 433.6691 | 476.7957 | 413.9602 | 1522.311 | 1475.986 | 1570.783 |
| 17402 | ZNF432    | 4.340525 | 1.786446 | 1.249991 | 1.429167 | 0.152956 | 0.233662 | 0.542086 | 3.831883 | 1.391463 | 6.696381 | 8.556443 | 5.024897 |
| 18367 | LOC119621 | 3.232531 | 1.786378 | 1.406292 | 1.270275 | 0.203987 | 0.295257 | 0.542086 | 1.642235 | 2.087194 | 6.696381 | 6.417332 | 2.009959 |
| 22709 | IQCF5     | 0.951233 | 1.78635  | 2.941794 | 0.607232 | 0.543697 | 0.636468 | 0        | 0.547412 | 0.695731 | 4.464254 | 0        | 0        |
| 15420 | FAM174B   | 7.073825 | 1.786281 | 1.016544 | 1.757209 | 0.078882 | 0.135998 | 2.168345 | 4.379295 | 2.782925 | 6.696381 | 21.39111 | 5.024897 |
| 651   | CRIP1     | 2779.443 | 1.784489 | 0.136057 | 13.11578 | 2.67E-39 | 1.09E-37 | 1077.126 | 1533.3   | 1140.999 | 4337.023 | 4205.492 | 4382.715 |
| 21354 | TSSK3     | 1.382596 | 1.784022 | 2.16642  | 0.823488 | 0.41023  | 0.510723 | 0.542086 | 0.547412 | 0.695731 | 2.232127 | 4.278221 | 0        |
| 15543 | MCEMP1    | 8.041754 | 1.783782 | 1.026822 | 1.737187 | 0.082354 | 0.14086  | 0.542086 | 2.737059 | 7.653045 | 11.16063 | 17.11289 | 9.044815 |
| 5348  | POU3F3    | 45.11149 | 1.783318 | 0.397207 | 4.48965  | 7.13E-06 | 3.55E-05 | 19.51511 | 24.08612 | 16.69755 | 80.35657 | 72.72976 | 57.28383 |
| 15728 | LOC103241 | 6.814144 | 1.782878 | 1.040786 | 1.713012 | 0.08671  | 0.146566 | 1.084173 | 2.737059 | 5.565851 | 4.464254 | 14.97377 | 12.05975 |
| 20482 | LOC119621 | 1.832657 | 1.782251 | 1.876213 | 0.949919 | 0.342153 | 0.444104 | 1.084173 | 0        | 1.391463 | 2.232127 | 4.278221 | 2.009959 |
| 14897 | TMEM266   | 7.952953 | 1.782093 | 0.960567 | 1.855252 | 0.06356  | 0.113435 | 4.878777 | 1.094824 | 4.87012  | 6.696381 | 17.11289 | 13.06473 |
| 1811  | LOC119621 | 251.6816 | 1.781658 | 0.211391 | 8.428253 | 3.51E-17 | 5.15E-16 | 118.1748 | 125.9047 | 94.61947 | 352.6761 | 477.0217 | 341.693  |
| 14455 | ABCA8     | 13.97135 | 1.781605 | 0.921668 | 1.933022 | 0.053234 | 0.097905 | 3.794605 | 3.831883 | 11.1317  | 6.696381 | 51.33866 | 7.034856 |
| 2589  | JAKMIP3   | 147.3273 | 1.781464 | 0.254605 | 6.996971 | 2.62E-12 | 2.69E-11 | 62.88202 | 81.01695 | 54.26705 | 274.5516 | 203.2155 | 208.0308 |
| 695   | RGS17     | 656.7583 | 1.781457 | 0.138653 | 12.84829 | 8.79E-38 | 3.36E-36 | 312.7838 | 266.5896 | 309.6005 | 921.8684 | 1084.529 | 1045.179 |
| 7775  | MYH11     | 25.71343 | 1.781186 | 0.513125 | 3.471249 | 0.000518 | 0.001771 | 9.757555 | 10.40082 | 14.61036 | 49.10679 | 34.22577 | 36.17926 |
| 19244 | EDN3      | 3.459573 | 1.781133 | 1.554926 | 1.145477 | 0.252011 | 0.348146 | 0        | 0.547412 | 4.174388 | 4.464254 | 8.556443 | 3.014938 |
| 21200 | LOC119611 | 1.885188 | 1.780205 | 2.094287 | 0.850029 | 0.395309 | 0.495721 | 1.084173 | 0        | 1.391463 | 6.696381 | 2.139111 | 0        |
| 15254 | SCN1A     | 7.073469 | 1.779371 | 0.995308 | 1.78776  | 0.073815 | 0.128646 | 4.336691 | 1.642235 | 3.478657 | 6.696381 | 19.252   | 7.034856 |
| 13320 | GDPD2     | 10.81392 | 1.778605 | 0.829709 | 2.14365  | 0.032061 | 0.063992 | 2.168345 | 6.02153  | 6.261582 | 17.85702 | 23.53022 | 9.044815 |
| 18107 | LOC119621 | 4.100289 | 1.778397 | 1.347571 | 1.319705 | 0.186933 | 0.274444 | 1.626259 | 3.831883 | 0        | 6.696381 | 6.417332 | 6.029877 |
| 17291 | LOC103231 | 3.890109 | 1.778254 | 1.226281 | 1.450119 | 0.147025 | 0.226052 | 2.168345 | 1.642235 | 1.391463 | 6.696381 | 6.417332 | 5.024897 |
| 8868  | ACTN3     | 26.78994 | 1.77781  | 0.564239 | 3.151324 | 0.001625 | 0.004872 | 9.757555 | 6.568942 | 20.17621 | 35.71403 | 51.33866 | 37.18424 |
| 21458 | LOC119621 | 2.023784 | 1.777561 | 2.194334 | 0.810069 | 0.417901 | 0.517751 | 2.710432 | 0        | 0        | 0        | 6.417332 | 3.014938 |
| 20496 | ODAPH     | 1.834432 | 1.777461 | 1.876084 | 0.947432 | 0.343419 | 0.445442 | 0        | 1.094824 | 1.391463 | 2.232127 | 4.278221 | 2.009959 |
| 351   | LOC119621 | 4815.184 | 1.776292 | 0.108157 | 16.42329 | 1.30E-60 | 9.87E-59 | 2319.588 | 1912.109 | 2298.696 | 7611.553 | 6975.64  | 7773.516 |
| 13235 | RAG1      | 10.29636 | 1.774174 | 0.820947 | 2.161132 | 0.030685 | 0.061637 | 3.252518 | 4.379295 | 6.261582 | 11.16063 | 25.66933 | 11.05477 |
| 17075 | GALR2     | 5.120026 | 1.774129 | 1.195051 | 1.484563 | 0.13766  | 0.21433  | 2.168345 | 0.547412 | 4.174388 | 13.39276 | 6.417332 | 4.019918 |
| 9767  | LOC103241 | 18.90725 | 1.774083 | 0.609159 | 2.912349 | 0.003587 | 0.009764 | 9.215468 | 7.663765 | 8.348776 | 40.17829 | 29.94755 | 18.9863  |
| 18143 | GPR84     | 3.718733 | 1.773402 | 1.34989  | 1.313738 | 0.188934 | 0.276846 | 1.626259 | 0.547412 | 2.782925 | 8.928508 | 6.417332 | 2.009959 |
| 5734  | RIIAD1    | 39.34776 | 1.772759 | 0.411558 | 4.307431 | 1.65E-05 | 7.66E-05 | 15.7205  | 17.51718 | 20.17621 | 55.80317 | 70.59065 | 56.27885 |
| 20898 | LOC103231 | 2.043724 | 1.772457 | 1.989983 | 0.890689 | 0.373096 | 0.474627 | 0        | 2.737059 | 0        | 2.232127 | 4.278221 | 3.014938 |
| 982   | LOC103241 | 387.3198 | 1.772247 | 0.159894 | 11.08389 | 1.50E-28 | 4.07E-27 | 173.4676 | 179.5511 | 174.6286 | 616.067  | 521.943  | 658.2616 |
| 9550  | LOC119621 | 20.87412 | 1.771355 | 0.595933 | 2.972406 | 0.002955 | 0.008225 | 5.96295  | 10.40082 | 11.82743 | 29.01765 | 44.92132 | 23.11453 |
| 13928 | LOC103221 | 12.73521 | 1.771305 | 0.874266 | 2.026048 | 0.04276  | 0.081618 | 6.505036 | 5.474118 | 4.87012  | 22.32127 | 34.22577 | 3.014938 |
| 21103 | LOC119621 | 1.817154 | 1.771292 | 2.048732 | 0.86458  | 0.387269 | 0.487859 | 1.084173 | 0        | 1.391463 | 0        | 6.417332 | 2.009959 |
| 20170 | LOC119611 | 3.027321 | 1.770359 | 1.768913 | 1.000818 | 0.316915 | 0.417707 | 0        | 0        | 4.174388 | 6.696381 | 4.278221 | 3.014938 |
| 13988 | LOC103231 | 9.10311  | 1.769748 | 0.879465 | 2.012301 | 0.044188 | 0.083982 | 5.420864 | 2.737059 | 4.174388 | 6.696381 | 23.53022 | 12.05975 |
| 17196 | MAL2      | 4.359388 | 1.769732 | 1.205291 | 1.468303 | 0.142022 | 0.219575 | 2.168345 | 2.189647 | 1.391463 | 6.696381 | 10.69555 | 3.014938 |
| 3215  | CYP1A1    | 91.42175 | 1.769246 | 0.287754 | 6.148459 | 7.82E-10 | 6.47E-09 | 50.41403 | 35.58177 | 38.26523 | 131.6955 | 151.8769 | 140.6971 |
| 20045 | LUM       | 2.511228 | 1.769083 | 1.732649 | 1.021028 | 0.307241 | 0.407463 | 1.084173 | 2.189647 | 0        | 2.232127 | 8.556443 | 1.004979 |
| 17256 | NTN5      | 4.620629 | 1.768954 | 1.21399  | 1.457141 | 0.145077 | 0.22351  | 1.626259 | 0.547412 | 4.174388 | 8.928508 | 6.417332 | 6.029877 |
| 10992 | MYBPHL    | 16.56654 | 1.768779 | 0.672339 | 2.630784 | 0.008519 | 0.020603 | 5.96295  | 6.568942 | 9.740239 | 24.5534  | 38.50399 | 14.06971 |
| 14331 | LOC103241 | 8.098593 | 1.768556 | 0.904325 | 1.955664 | 0.050505 | 0.09369  | 2.710432 | 3.284471 | 4.87012  | 17.85702 | 12.83466 | 7.034856 |
| 704   | SH3BP5    | 1914.602 | 1.768003 | 0.137986 | 12.81314 | 1.38E-37 | 5.23E-36 | 738.8637 | 1048.294 | 820.963  | 2837.033 | 2904.912 | 3137.546 |
| 10703 | TRNAW-CC  | 16.99681 | 1.767995 | 0.657063 | 2.690753 | 0.007129 | 0.017708 | 5.96295  | 11.49565 | 5.565851 | 35.71403 | 17.11289 | 26.12947 |
| 16273 | HSPB7     | 6.440612 | 1.767327 | 1.095527 | 1.613221 | 0.106696 | 0.174318 | 2.710432 | 1.094824 | 4.87012  | 6.696381 | 19.252   | 4.019918 |
| 15448 | LOC119621 | 8.018607 | 1.767295 | 1.00904  | 1.751462 | 0.079866 | 0.137445 | 0.542086 | 5.474118 | 4.87012  | 8.928508 | 19.252   | 9.044815 |
| 16554 | LOC103231 | 6.042916 | 1.766971 | 1.129257 | 1.56472  | 0.117649 | 0.188939 | 0.542086 | 2.737059 | 4.87012  | 13.39276 | 10.69555 | 4.019918 |
| 15898 | EXTL1     | 6.178849 | 1.76634  | 1.048508 | 1.684623 | 0.092061 | 0.153947 | 3.794605 | 1.094824 | 3.478657 | 6.696381 | 14.97377 | 7.034856 |
| 15463 | DENND2D   | 6.422697 | 1.766042 | 1.008664 | 1.750872 | 0.079968 | 0.137486 | 1.626259 | 4.926706 | 2.087194 | 11.16063 | 10.69555 | 8.039836 |
| 5209  | TREH      | 42.99957 | 1.765832 | 0.386069 | 4.573879 | 4.79E-06 | 2.44E-05 | 18.97302 | 20.25424 | 19.48048 | 62.49956 | 68.45154 | 68.3386  |
| 8556  | MAEL      | 23.5588  | 1.765243 | 0.544903 | 3.239551 | 0.001197 | 0.00372  | 12.46799 | 13.13788 | 6.261582 | 37.94616 | 36.36488 | 35.17428 |
| 8329  | LOC119621 | 24.66302 | 1.764985 | 0.533915 | 3.305742 | 0.000947 | 0.003024 | 14.09425 | 8.758589 | 11.1317  | 37.94616 | 27.80844 | 48.23901 |
| 1581  | LOC119621 | 245.0789 | 1.764505 | 0.19531  | 9.034375 | 1.65E-19 | 2.77E-18 | 125.764  | 94.15483 | 115.4914 | 359.3724 | 363.6488 | 412.0416 |
| 21691 | CHRNA1    | 1.402181 | 1.764298 | 2.266545 | 0.778408 | 0.436328 | 0.53475  | 0        | 0.547412 | 1.391463 | 4.464254 | 0        | 2.009959 |
| 21692 | MAGEB18   | 1.402181 | 1.764298 | 2.266545 | 0.778408 | 0.436328 | 0.53475  | 0        | 0.547412 | 1.391463 | 4.464254 | 0        | 2.009959 |
| 1823  | LOC119621 | 219.8759 | 1.763792 | 0.210298 | 8.387118 | 4.98E-17 | 7.27E-16 | 94.32303 | 90.87036 | 116.8829 | 325.8905 | 297.3364 | 393.952  |
| 2344  | TG        | 180.727  | 1.763406 | 0.240004 | 7.347402 | 2.02E-13 | 2.29E-12 | 98.11763 | 77.18507 | 69.57314 | 312.4978 | 305.8928 |          |



|       |           |          |          |          |          |          |           |          |          |          |          |          |          |
|-------|-----------|----------|----------|----------|----------|----------|-----------|----------|----------|----------|----------|----------|----------|
| 8313  | ELAVL3    | 35.5995  | 1.762099 | 0.532352 | 3.310024 | 0.000933 | 0.002983  | 10.29964 | 9.853413 | 28.52499 | 66.96381 | 57.75599 | 40.19918 |
| 19206 | BSPRY     | 2.753772 | 1.762    | 1.529606 | 1.151931 | 0.249349 | 0.34515   | 0.542086 | 1.094824 | 2.087194 | 2.232127 | 8.556443 | 2.009959 |
| 21196 | LOC103220 | 1.87146  | 1.761566 | 2.071044 | 0.850569 | 0.395009 | 0.495438  | 0        | 1.094824 | 1.391463 | 4.464254 | 4.278221 | 0        |
| 19671 | SLC35G6   | 2.337024 | 1.761209 | 1.638539 | 1.074866 | 0.282435 | 0.381721  | 0.542086 | 0.547412 | 2.087194 | 6.696381 | 2.139111 | 2.009959 |
| 4041  | PDZD7     | 69.78552 | 1.760301 | 0.329596 | 5.340781 | 9.25E-08 | 6.09E-07  | 35.7777  | 26.82318 | 32.69937 | 89.28508 | 132.6249 | 101.5029 |
| 14315 | C7        | 9.072771 | 1.76017  | 0.89861  | 1.958769 | 0.05014  | 0.093132  | 3.794605 | 2.189647 | 6.261582 | 22.32127 | 12.83466 | 7.034856 |
| 11092 | CUNH16or  | 16.9749  | 1.759798 | 0.674937 | 2.607354 | 0.009124 | 0.021869  | 3.794605 | 7.663765 | 11.82743 | 20.08914 | 36.36488 | 22.10955 |
| 19596 | LOC119626 | 2.78886  | 1.756539 | 1.616465 | 1.086654 | 0.27719  | 0.376031  | 0        | 1.094824 | 2.782925 | 6.696381 | 2.139111 | 4.019918 |
| 11094 | SLC5A11   | 16.34873 | 1.75632  | 0.67378  | 2.606668 | 0.009143 | 0.021909  | 8.673382 | 3.284471 | 10.43597 | 26.78552 | 27.80844 | 21.10457 |
| 2761  | S100A14   | 107.9651 | 1.756121 | 0.259872 | 6.75764  | 1.40E-11 | 1.35E-10  | 47.7036  | 45.43518 | 54.96278 | 151.7846 | 186.1026 | 161.8017 |
| 779   | LRRN4CL   | 409.9959 | 1.755913 | 0.143616 | 12.2264  | 2.25E-34 | 7.67E-33  | 185.9356 | 186.12   | 189.9347 | 624.9956 | 643.8723 | 629.1171 |
| 22448 | LOC119624 | 0.934843 | 1.755035 | 2.702492 | 0.649414 | 0.516071 | 0.611179  | 0.542086 | 0        | 0.695731 | 2.232127 | 2.139111 | 0        |
| 21306 | TPD52L3   | 1.386679 | 1.75446  | 2.107902 | 0.832325 | 0.405226 | 0.505628  | 0        | 0.547412 | 1.391463 | 2.232127 | 2.139111 | 2.009959 |
| 10853 | PIWIL4    | 15.48967 | 1.75409  | 0.659437 | 2.65998  | 0.007815 | 0.019142  | 5.96295  | 9.306001 | 6.261582 | 17.85702 | 21.39111 | 32.15934 |
| 20349 | LOC103231 | 2.996316 | 1.753992 | 1.809555 | 0.969295 | 0.332398 | 0.434262  | 0        | 0        | 4.174388 | 2.232127 | 8.556443 | 3.014938 |
| 13865 | C1QL3     | 9.145536 | 1.753036 | 0.860673 | 2.03682  | 0.041668 | 0.079895  | 5.420864 | 3.831883 | 3.478657 | 15.62489 | 6.417332 | 20.09959 |
| 20708 | LOC119618 | 1.836739 | 1.7525   | 1.907039 | 0.918964 | 0.358114 | 0.459748  | 0.542086 | 0        | 2.087194 | 2.232127 | 2.139111 | 4.019918 |
| 8986  | VIPR2     | 26.32565 | 1.75156  | 0.561179 | 3.121216 | 0.001801 | 0.005328  | 13.55216 | 8.211177 | 13.91463 | 42.41041 | 57.75599 | 22.10955 |
| 14754 | LOC119625 | 9.565882 | 1.751338 | 0.93128  | 1.88057  | 0.06003  | 0.108168  | 4.336691 | 1.642235 | 6.957314 | 22.32127 | 17.11289 | 5.024897 |
| 402   | HABP2     | 4971.215 | 1.75077  | 0.111696 | 15.67447 | 2.26E-55 | 1.50E-53  | 2110.884 | 2595.279 | 2127.547 | 7633.874 | 7217.359 | 8142.344 |
| 21169 | TEX43     | 1.85313  | 1.750585 | 2.047156 | 0.85513  | 0.392479 | 0.492893  | 0        | 0.547412 | 2.087194 | 4.464254 | 0        | 4.019918 |
| 277   | AOPEP     | 2166.258 | 1.750333 | 0.09785  | 17.88783 | 1.47E-71 | 1.41E-69  | 1057.611 | 954.6862 | 966.3709 | 3258.905 | 3337.013 | 3422.96  |
| 22458 | CCDC192   | 0.93573  | 1.750188 | 2.701784 | 0.64779  | 0.517121 | 0.612095  | 0        | 0.547412 | 0.695731 | 2.232127 | 2.139111 | 0        |
| 22459 | LOC103233 | 0.93573  | 1.750188 | 2.701784 | 0.64779  | 0.517121 | 0.612095  | 0        | 0.547412 | 0.695731 | 2.232127 | 2.139111 | 0        |
| 22460 | LOC103245 | 0.93573  | 1.750188 | 2.701784 | 0.64779  | 0.517121 | 0.612095  | 0        | 0.547412 | 0.695731 | 2.232127 | 2.139111 | 0        |
| 16198 | SKOR2     | 9.094389 | 1.74933  | 1.074963 | 1.627339 | 0.103665 | 0.170141  | 1.626259 | 4.379295 | 6.261582 | 15.62489 | 25.66933 | 1.004979 |
| 14443 | LOC103235 | 10.3093  | 1.748365 | 0.90321  | 1.935723 | 0.052902 | 0.097375  | 4.878777 | 1.094824 | 8.348776 | 8.928508 | 23.53022 | 15.07469 |
| 15215 | PRG4      | 8.097859 | 1.747887 | 0.974784 | 1.793102 | 0.072957 | 0.127476  | 2.168345 | 6.568942 | 2.087194 | 15.62489 | 17.11289 | 5.024897 |
| 19309 | LOC119627 | 4.237868 | 1.747747 | 1.542602 | 1.132986 | 0.25722  | 0.354145  | 0.542086 | 4.379295 | 0.695731 | 13.39276 | 6.417332 | 0        |
| 15892 | LOC119628 | 6.290656 | 1.74685  | 1.036194 | 1.685834 | 0.091828 | 0.153615  | 1.626259 | 2.737059 | 4.174388 | 15.62489 | 8.556443 | 5.024897 |
| 18992 | LOC119619 | 3.01382  | 1.746578 | 1.471942 | 1.186581 | 0.235393 | 0.329503  | 1.626259 | 1.642235 | 0.695731 | 6.696381 | 6.417332 | 1.004979 |
| 15804 | IRX4      | 5.977416 | 1.74595  | 1.026729 | 1.700497 | 0.089038 | 0.149776  | 3.794605 | 2.189647 | 2.087194 | 8.928508 | 12.83466 | 6.029877 |
| 12299 | LOC119620 | 14.67262 | 1.745904 | 0.744584 | 2.344805 | 0.019037 | 0.04115   | 6.505036 | 9.853413 | 3.478657 | 15.62489 | 38.50399 | 14.06971 |
| 981   | CA11      | 918.2784 | 1.745037 | 0.157404 | 11.08635 | 1.46E-28 | 3.96E-27  | 354.5245 | 524.9679 | 386.1309 | 1462.043 | 1351.918 | 1030.086 |
| 7910  | LOC119624 | 35.73065 | 1.744849 | 0.507941 | 3.435143 | 0.000592 | 0.00199   | 9.757555 | 13.13788 | 26.43779 | 49.10679 | 72.72976 | 43.21412 |
| 587   | PRRT3     | 993.9351 | 1.744418 | 0.126923 | 13.74387 | 5.54E-43 | 2.51E-41  | 411.4436 | 506.9033 | 453.6169 | 1540.168 | 1437.482 | 1613.997 |
| 799   | IL6R      | 421.2934 | 1.744217 | 0.144291 | 12.08817 | 1.22E-33 | 4.06E-32  | 184.3094 | 197.0683 | 200.3706 | 649.549  | 633.1768 | 663.2864 |
| 5757  | LOC103247 | 47.43677 | 1.744152 | 0.405924 | 4.296741 | 1.73E-05 | 8.00E-05  | 25.47806 | 23.53871 | 16.69755 | 78.12444 | 51.33866 | 89.44317 |
| 22841 | LOC119624 | 0.91934  | 1.743859 | 2.971817 | 0.586799 | 0.557339 | 0.648695  | 0.542086 | 0        | 0.695731 | 0        | 4.278221 | 0        |
| 18159 | TRNAP-CG  | 3.483465 | 1.743545 | 1.330194 | 1.310745 | 0.189944 | 0.27808   | 1.626259 | 1.094824 | 2.087194 | 8.928508 | 2.139111 | 5.024897 |
| 11311 | CITED1    | 17.25532 | 1.74345  | 0.682178 | 2.555712 | 0.010597 | 0.024907  | 5.420864 | 7.116354 | 11.1317  | 17.85702 | 44.92132 | 17.08465 |
| 635   | OAS2      | 581.3311 | 1.743124 | 0.131575 | 13.2481  | 4.63E-40 | 1.94E-38  | 260.2015 | 281.3697 | 261.595  | 888.3865 | 857.7834 | 938.6508 |
| 11816 | LOC103227 | 15.71094 | 1.742297 | 0.712792 | 2.444328 | 0.014512 | 0.032651  | 4.878777 | 9.306001 | 7.653045 | 8.928508 | 36.36488 | 27.13445 |
| 15654 | LOC119627 | 7.923464 | 1.741944 | 1.010303 | 1.72418  | 0.084675 | 0.143803  | 5.420864 | 1.094824 | 4.174388 | 17.85702 | 14.97377 | 4.019918 |
| 325   | RHOBTB1   | 3290.325 | 1.741859 | 0.103505 | 16.8288  | 1.50E-63 | 1.23E-61  | 1478.812 | 1645.52  | 1421.379 | 4874.965 | 4879.311 | 5441.964 |
| 12772 | DAO       | 11.35564 | 1.74102  | 0.775097 | 2.246197 | 0.024691 | 0.051395  | 4.336691 | 5.474118 | 5.565851 | 22.32127 | 21.39111 | 9.044815 |
| 3923  | MPZL3     | 75.56746 | 1.739923 | 0.320697 | 5.425434 | 5.78E-08 | 3.92E-07  | 36.31979 | 32.2973  | 36.17803 | 84.82083 | 141.1813 | 122.6075 |
| 12892 | FAM133A   | 11.56718 | 1.739524 | 0.783495 | 2.22021  | 0.026405 | 0.05445   | 3.794605 | 4.379295 | 7.653045 | 17.85702 | 25.66933 | 10.04979 |
| 733   | ARHGAP24  | 720.7617 | 1.739208 | 0.138129 | 12.5912  | 2.36E-36 | 8.56E-35  | 295.4371 | 380.4512 | 320.7322 | 1116.063 | 1097.364 | 1114.522 |
| 22850 | LOC119626 | 0.920227 | 1.738758 | 2.971009 | 0.585241 | 0.558385 | 0.649629  | 0        | 0.547412 | 0.695731 | 0        | 4.278221 | 0        |
| 11694 | LOC103233 | 17.65954 | 1.73846  | 0.703165 | 2.472336 | 0.013423 | 0.030516  | 4.336691 | 6.02153  | 13.91463 | 31.24978 | 36.36488 | 14.06971 |
| 10019 | COL28A1   | 22.5716  | 1.73831  | 0.608461 | 2.856897 | 0.004278 | 0.011352  | 8.673382 | 11.49565 | 10.43597 | 49.10679 | 40.6431  | 15.07469 |
| 721   | LRFN5     | 660.9113 | 1.738261 | 0.137418 | 12.64943 | 1.13E-36 | 4.15E-35  | 336.0935 | 289.5808 | 290.12   | 993.2965 | 951.9042 | 1104.472 |
| 16172 | LOC103234 | 5.548715 | 1.73813  | 1.064903 | 1.632195 | 0.102638 | 0.168726  | 1.626259 | 3.831883 | 2.087194 | 11.16063 | 8.556443 | 6.029877 |
| 1264  | LOC119628 | 648.1724 | 1.737632 | 0.174549 | 9.95499  | 2.40E-23 | 5.004E-22 | 319.2889 | 236.4819 | 342.2998 | 1127.224 | 840.6705 | 1023.069 |
| 8432  | PDGFRB    | 30.13115 | 1.737231 | 0.530773 | 3.27302  | 0.001064 | 0.003354  | 11.38381 | 9.853413 | 20.17621 | 51.33892 | 59.8951  | 28.13943 |
| 6900  | LOC103224 | 43.83607 | 1.737084 | 0.459984 | 3.776404 | 0.000159 | 0.000613  | 16.26259 | 21.34906 | 22.2634  | 78.12444 | 89.84265 | 35.17428 |
| 9387  | WNT5B     | 26.26638 | 1.736933 | 0.577061 | 3.009964 | 0.002613 | 0.0074    | 7.047123 | 10.94824 | 18.08902 | 51.33892 | 47.06043 | 23.11453 |
| 693   | RASGRP3   | 509.3896 | 1.736733 | 0.13505  | 12.85997 | 7.56E-38 | 2.90E-36  | 226.5921 | 246.8827 | 231.6785 | 799.1015 | 772.219  | 779.8641 |
| 17141 | LOC103227 | 4.613872 | 1.736228 | 1.177923 | 1.473975 | 0.140488 | 0.217892  | 1.084173 | 3.831883 | 1.391463 | 8.928508 | 6.417332 | 6.029877 |
| 21253 | LOC103217 | 1.890158 | 1.735405 | 2.062023 | 0.841603 | 0.40001  | 0.500366  | 0        | 0.547412 | 2.087194 | 6.696381 | 0        | 2.009959 |
| 21791 | LOC119618 | 1.371176 | 1.734627 | 2.279652 | 0.760918 | 0.446706 | 0.544981  | 0        | 0.547412 | 1.391463 | 0        | 4.278221 | 2.009959 |
| 20827 | MSMB      | 2.343934 | 1.734326 | 1.925341 | 0.900789 | 0.367701 | 0.469358  | 0        | 1.094824 | 2.087194 | 4.464254 | 6.417332 | 0        |
| 11344 | DDX4      | 16.74561 | 1.7338   | 0.680515 | 2.547775 | 0.010841 | 0.025407  | 6.505036 | 8.211177 | 8.348776 | 13.39276 | 44.92132 | 19.09461 |
| 10178 | LOC103219 | 20.90943 | 1.733768 | 0.614831 | 2.819908 | 0.004804 | 0.012547  | 8.673382 | 12.04306 | 7.653045 | 44.64254 | 36.36488 | 16.07967 |
| 1017  | MROH1     | 2066.743 | 1.733461 | 0.158856 | 10.91218 | 1.01E-27 | 2.64E-26  | 1104.772 | 729.6999 | 1035.248 | 2928.551 | 2954.112 | 3648.075 |
| 13689 | LOC103233 | 9.036428 | 1.730709 | 0.835523 | 2.071408 | 0.038321 | 0.074421  | 4.336691 | 3.831883 | 4.174388 | 17.85702 | 14.97377 | 9.044815 |
| 8349  | LOC103236 | 33.81421 | 1.729878 | 0.524715 | 3.296793 | 0.000978 | 0.003114  | 12.46799 | 8.211177 | 26.43779 | 55.80317 | 57.75599 | 42.20914 |
| 6748  | LOC119619 | 34.64901 | 1.729817 | 0.450688 | 3.838171 | 0.000124 | 0.000488  | 18.43094 | 12.04306 | 18.08902 | 42.41041 | 55.61688 | 61.30375 |
| 5806  | LOC103230 | 57.74996 | 1.729462 | 0.404944 | 4.270867 | 1.95E-05 | 8.92E-05  | 20.59928 | 22.9913  | 36.17803 | 98.21359 | 111.2338 | 57.28383 |
| 5249  | PCDH18    | 51.02078 | 1.729366 | 0.379822 | 4.553098 | 5.29E-   |           |          |          |          |          |          |          |



|       |           |          |          |          |          |          |          |          |          |          |          |          |          |
|-------|-----------|----------|----------|----------|----------|----------|----------|----------|----------|----------|----------|----------|----------|
| 13211 | BIRC7     | 13.08578 | 1.726277 | 0.797074 | 2.165766 | 0.030329 | 0.061032 | 2.710432 | 4.379295 | 11.1317  | 31.24978 | 14.97377 | 14.06971 |
| 15557 | LOC103225 | 6.993426 | 1.725968 | 0.994981 | 1.734675 | 0.082798 | 0.141483 | 2.168345 | 2.737059 | 4.87012  | 17.85702 | 4.278221 | 10.04979 |
| 6141  | LOC119624 | 55.07773 | 1.72578  | 0.420826 | 4.100932 | 4.11E-05 | 0.000178 | 27.10432 | 13.6853  | 36.17803 | 71.42806 | 102.6773 | 79.39338 |
| 13528 | LOC119621 | 10.79765 | 1.72488  | 0.820489 | 2.10226  | 0.035531 | 0.069824 | 6.505036 | 5.474118 | 2.782925 | 11.16063 | 27.80844 | 11.05477 |
| 1959  | LOC103228 | 161.6527 | 1.724334 | 0.213619 | 8.072026 | 6.91E-16 | 9.38E-15 | 72.63957 | 74.99542 | 77.22618 | 272.3195 | 239.5804 | 233.1552 |
| 15319 | KREMEN2   | 7.480148 | 1.72413  | 0.970594 | 1.776367 | 0.075673 | 0.131324 | 2.710432 | 3.284471 | 4.174388 | 17.85702 | 12.83466 | 4.019918 |
| 20021 | LOC103246 | 3.919738 | 1.723273 | 1.682259 | 1.024381 | 0.305655 | 0.405866 | 0        | 0        | 5.565851 | 2.232127 | 10.69555 | 5.024897 |
| 15669 | PPY       | 6.180789 | 1.723221 | 1.000411 | 1.722514 | 0.084977 | 0.144177 | 3.794605 | 2.189647 | 2.782925 | 6.696381 | 8.556443 | 13.06473 |
| 12611 | STH       | 12.99957 | 1.722654 | 0.75542  | 2.280393 | 0.022584 | 0.04761  | 9.757555 | 4.379295 | 4.174388 | 11.16063 | 21.39111 | 27.13445 |
| 9494  | LMAN1L    | 22.16921 | 1.722366 | 0.57694  | 2.985348 | 0.002833 | 0.007932 | 9.757555 | 6.568942 | 14.61036 | 29.01765 | 44.92132 | 28.13943 |
| 10642 | CUNH2orf  | 19.64383 | 1.72235  | 0.636006 | 2.708071 | 0.006768 | 0.016905 | 5.96295  | 14.78012 | 6.261582 | 31.24978 | 38.50399 | 21.10457 |
| 13667 | CST5      | 11.11225 | 1.721951 | 0.829868 | 2.074968 | 0.037989 | 0.073897 | 4.336691 | 2.737059 | 8.348776 | 13.39276 | 27.80844 | 10.04979 |
| 19170 | LOC103242 | 3.43962  | 1.721488 | 1.487173 | 1.157557 | 0.247045 | 0.342596 | 0        | 2.737059 | 2.087194 | 2.232127 | 8.556443 | 5.024897 |
| 16301 | ADGRG7    | 5.798701 | 1.721056 | 1.071359 | 1.606424 | 0.108181 | 0.17643  | 2.168345 | 1.094824 | 4.87012  | 8.928508 | 10.69555 | 7.034856 |
| 17925 | SPATS1    | 5.605799 | 1.720744 | 1.269135 | 1.355584 | 0.17515  | 0.259769 | 1.626259 | 0        | 6.261582 | 11.16063 | 8.556443 | 6.029877 |
| 16977 | F10       | 6.56483  | 1.719671 | 1.149318 | 1.496253 | 0.134588 | 0.210764 | 0.542086 | 1.642235 | 6.957314 | 13.39276 | 12.83466 | 4.019918 |
| 17337 | LOC103235 | 4.149728 | 1.719492 | 1.192697 | 1.441683 | 0.149392 | 0.229081 | 1.626259 | 2.737059 | 1.391463 | 6.696381 | 6.417332 | 6.029877 |
| 17485 | RGN       | 4.150616 | 1.719047 | 1.215978 | 1.413715 | 0.157446 | 0.239388 | 1.084173 | 3.284471 | 1.391463 | 6.696381 | 6.417332 | 6.029877 |
| 11690 | ZMYND15   | 19.21907 | 1.718801 | 0.69493  | 2.473346 | 0.013385 | 0.030441 | 6.505036 | 8.211177 | 11.82743 | 20.08914 | 55.61688 | 13.06473 |
| 917   | GFPT2     | 943.4322 | 1.718589 | 0.150662 | 11.40691 | 3.86E-30 | 1.12E-28 | 430.9587 | 512.9249 | 376.3907 | 1412.936 | 1296.301 | 1631.082 |
| 18636 | FCN1      | 5.852946 | 1.718448 | 1.392275 | 1.234274 | 0.217101 | 0.309867 | 0        | 0.547412 | 7.653045 | 8.928508 | 14.97377 | 3.014938 |
| 19053 | CUNH3orf  | 2.987784 | 1.717947 | 1.460105 | 1.176591 | 0.239359 | 0.333982 | 0.542086 | 2.189647 | 1.391463 | 2.232127 | 8.556443 | 3.014938 |
| 13915 | CMTM2     | 9.044758 | 1.71769  | 0.847086 | 2.027764 | 0.042584 | 0.081359 | 4.878777 | 2.737059 | 4.87012  | 15.62489 | 17.11289 | 9.044815 |
| 20268 | ACOT12    | 3.319887 | 1.717678 | 1.743849 | 0.984993 | 0.324628 | 0.425806 | 0        | 1.094824 | 3.478657 | 8.928508 | 6.417332 | 0        |
| 5129  | LXN       | 47.11922 | 1.716247 | 0.371967 | 4.613978 | 3.95E-06 | 2.05E-05 | 19.51511 | 23.53871 | 22.95914 | 75.89232 | 68.45154 | 72.35852 |
| 10183 | LOC119618 | 19.95824 | 1.715501 | 0.608588 | 2.81882  | 0.00482  | 0.012584 | 7.589209 | 8.211177 | 11.82743 | 31.24978 | 42.78221 | 18.08963 |
| 2383  | LOC119625 | 187.701  | 1.715402 | 0.235028 | 7.298699 | 2.91E-13 | 3.24E-12 | 107.8752 | 70.06871 | 84.1835  | 270.0874 | 333.7013 | 260.2897 |
| 585   | LOC103224 | 977.1131 | 1.715255 | 0.124578 | 13.76849 | 3.94E-43 | 1.79E-41 | 462.9418 | 425.8864 | 482.8376 | 1457.579 | 1388.283 | 1645.151 |
| 774   | METTL7B   | 118.0329 | 1.71495  | 0.13952  | 12.29176 | 1.00E-34 | 3.44E-33 | 304.6525 | 386.4727 | 315.1663 | 1078.117 | 1078.112 | 1145.677 |
| 579   | TRIB1     | 8994.48  | 1.714538 | 0.124066 | 13.81954 | 1.94E-43 | 8.92E-42 | 3801.652 | 5041.663 | 3760.428 | 13394.99 | 13442.17 | 14525.97 |
| 13474 | LOC119627 | 12.83788 | 1.713256 | 0.811145 | 2.112145 | 0.034674 | 0.068414 | 9.215468 | 2.189647 | 6.261582 | 26.78552 | 23.53022 | 9.044815 |
| 17947 | TEX50     | 4.362155 | 1.713096 | 1.267458 | 1.351599 | 0.176504 | 0.261464 | 0.542086 | 2.189647 | 3.478657 | 2.232127 | 10.69555 | 7.034856 |
| 5081  | WNT11     | 49.75152 | 1.712947 | 0.368947 | 4.642801 | 3.44E-06 | 1.80E-05 | 25.47806 | 20.25424 | 24.3506  | 64.73168 | 81.28621 | 82.40832 |
| 2218  | LOC119626 | 357.8576 | 1.712649 | 0.226321 | 7.567337 | 3.81E-14 | 4.57E-13 | 189.1881 | 127.547  | 187.8475 | 477.6752 | 451.3524 | 713.5354 |
| 13817 | OVGP1     | 10.64928 | 1.710832 | 0.836563 | 2.045072 | 0.040848 | 0.078594 | 8.131296 | 4.379295 | 2.087194 | 17.85702 | 21.39111 | 10.04979 |
| 15364 | TMEM26    | 8.324281 | 1.710665 | 0.968228 | 1.766801 | 0.077262 | 0.133706 | 3.794605 | 2.189647 | 5.565851 | 6.696381 | 25.66933 | 6.029877 |
| 21112 | LOC119621 | 1.581887 | 1.71066  | 1.981389 | 0.863364 | 0.387937 | 0.488505 | 1.084173 | 0.547412 | 0.695731 | 0        | 2.139111 | 5.024897 |
| 21468 | ALLC      | 1.911683 | 1.710394 | 2.117903 | 0.807588 | 0.419328 | 0.51918  | 0        | 0.547412 | 2.087194 | 6.696381 | 2.139111 | 0        |
| 20160 | MEIKIN    | 3.214825 | 1.709483 | 1.706304 | 1.001863 | 0.31641  | 0.41725  | 0        | 1.094824 | 3.478657 | 0        | 10.69555 | 4.019918 |
| 384   | LOC119623 | 2154.31  | 1.709233 | 0.107138 | 15.9535  | 2.69E-57 | 1.86E-55 | 942.6882 | 1116.173 | 969.1538 | 3232.12  | 3240.753 | 3424.97  |
| 1893  | CCDC102B  | 249.668  | 1.70921  | 0.208259 | 8.207137 | 2.27E-16 | 3.18E-15 | 106.2489 | 135.7581 | 107.1426 | 457.586  | 363.6488 | 327.6233 |
| 530   | YPEL3     | 929.6652 | 1.708162 | 0.119811 | 14.25717 | 4.05E-46 | 2.03E-44 | 414.6961 | 469.6793 | 423.7004 | 1433.026 | 1345.501 | 1491.39  |
| 18344 | LOC103228 | 4.205393 | 1.707672 | 1.339061 | 1.275276 | 0.202212 | 0.293055 | 0.542086 | 0.547412 | 4.87012  | 6.696381 | 8.556443 | 4.019918 |
| 15186 | LOC119615 | 7.923036 | 1.707374 | 0.949393 | 1.798386 | 0.072116 | 0.126248 | 3.794605 | 1.642235 | 5.565851 | 13.39276 | 17.11289 | 6.029877 |
| 9526  | LOC119627 | 26.98795 | 1.706955 | 0.57323  | 2.977784 | 0.002903 | 0.008103 | 6.505036 | 19.15941 | 11.82743 | 49.10679 | 49.19955 | 26.12947 |
| 1320  | SCN1B     | 339.086  | 1.706327 | 0.174217 | 9.794267 | 1.19E-22 | 2.40E-21 | 178.3464 | 139.59   | 160.7139 | 493.3001 | 487.7172 | 574.8483 |
| 19437 | CUNH5orf  | 3.513676 | 1.706072 | 1.534405 | 1.111878 | 0.26619  | 0.364083 | 0        | 2.737059 | 2.087194 | 6.696381 | 8.556443 | 1.004979 |
| 1608  | ZNFX616   | 240.8006 | 1.705397 | 0.190266 | 8.963204 | 3.15E-19 | 5.21E-18 | 109.5014 | 124.2625 | 104.3597 | 345.9797 | 414.9875 | 345.7129 |
| 14982 | LOC103248 | 7.597678 | 1.705274 | 0.928174 | 1.837234 | 0.066175 | 0.117426 | 2.168345 | 4.379295 | 4.174388 | 6.696381 | 17.11289 | 11.05477 |
| 668   | ITPKB     | 951.2723 | 1.704878 | 0.131092 | 13.00517 | 1.14E-38 | 4.55E-37 | 448.3054 | 491.0284 | 400.7413 | 1513.382 | 1315.553 | 1538.624 |
| 8716  | LOC103220 | 18.02002 | 1.704709 | 0.533001 | 3.198321 | 0.001382 | 0.004216 | 9.215468 | 19.15941 | 11.1317  | 53.57105 | 27.80844 | 47.23404 |
| 12035 | LOC103228 | 14.96448 | 1.704627 | 0.710297 | 2.399877 | 0.016401 | 0.036228 | 4.878777 | 4.926706 | 11.1317  | 31.24978 | 23.53022 | 14.06971 |
| 17555 | LOC119627 | 4.884331 | 1.703786 | 1.211578 | 1.406253 | 0.159649 | 0.24177  | 0.542086 | 1.642235 | 4.87012  | 8.928508 | 4.278221 | 9.044815 |
| 15263 | LOC103240 | 9.566304 | 1.702928 | 0.953676 | 1.785646 | 0.074157 | 0.129166 | 4.878777 | 2.737059 | 5.565851 | 13.39276 | 27.80844 | 3.014938 |
| 16721 | LOC119625 | 5.111066 | 1.702608 | 1.106653 | 1.53852  | 0.123922 | 0.197025 | 1.084173 | 3.284471 | 2.782925 | 8.928508 | 8.556443 | 6.029877 |
| 20334 | DBX1      | 2.347129 | 1.701685 | 1.751414 | 0.971607 | 0.331246 | 0.433077 | 0        | 0.547412 | 2.782925 | 4.462454 | 4.278221 | 2.009959 |
| 14798 | LOC103227 | 7.371169 | 1.701293 | 0.908199 | 1.87326  | 0.061032 | 0.109646 | 4.336691 | 3.284471 | 2.782925 | 8.928508 | 12.83466 | 12.05975 |
| 4023  | LOC119624 | 81.08545 | 1.700809 | 0.317605 | 5.355115 | 8.55E-08 | 5.65E-07 | 46.61943 | 29.01283 | 38.26523 | 122.767  | 143.3204 | 106.5278 |
| 16138 | LOC103223 | 6.034488 | 1.700257 | 1.036961 | 1.639654 | 0.101077 | 0.166522 | 1.084173 | 3.284471 | 4.174388 | 8.928508 | 10.69555 | 8.039836 |
| 976   | CBR3      | 357.9177 | 1.69955  | 0.152981 | 11.10954 | 1.13E-28 | 3.07E-27 | 172.9256 | 171.8873 | 160.0182 | 566.9603 | 539.0559 | 536.659  |
| 522   | MTSS1     | 1859.892 | 1.699338 | 0.118435 | 14.34832 | 1.09E-46 | 5.56E-45 | 815.2979 | 996.8369 | 816.0929 | 2761.141 | 2753.035 | 3016.948 |
| 7708  | LOC103215 | 27.76472 | 1.698911 | 0.486736 | 3.490418 | 0.000482 | 0.001663 | 16.26259 | 10.40082 | 12.52316 | 42.41041 | 42.78221 | 42.20914 |
| 10564 | LOC103247 | 20.79931 | 1.69889  | 0.622316 | 2.729947 | 0.006334 | 0.015941 | 4.878777 | 10.40082 | 13.91463 | 42.41041 | 32.08666 | 21.10457 |
| 16931 | LOC119627 | 5.616486 | 1.698814 | 1.131031 | 1.502005 | 0.133096 | 0.208992 | 1.626259 | 3.284471 | 2.782925 | 11.16063 | 12.83466 | 2.009959 |
| 11549 | MORN5     | 16.63445 | 1.698447 | 0.678219 | 2.504274 | 0.01227  | 0.028245 | 11.38381 | 3.284471 | 9.044508 | 24.5534  | 21.39111 | 30.14938 |
| 14173 | LOC103233 | 9.303845 | 1.697439 | 0.856543 | 1.981733 | 0.047509 | 0.089104 | 2.710432 | 6.02153  | 4.174388 | 15.62489 | 19.252   | 8.039836 |
| 13065 | LOC119615 | 15.39029 | 1.697175 | 0.773618 | 1.293817 | 0.028249 | 0.057472 | 4.878777 | 11.49565 | 4.87012  | 24.5534  | 38.50399 | 8.039836 |
| 7586  | LOC119627 | 30.47979 | 1.696529 | 0.48052  | 3.530611 | 0.000415 | 0.001453 | 17.34676 | 12.04306 | 13.2189  | 58.0353  | 47.06043 | 35.17428 |
| 1536  | LRMDA     | 227.9284 | 1.696341 | 0.185574 | 9.14107  | 6.18E-20 | 1.07E-18 | 111.6698 | 102.9134 | 107.1426 | 343.7476 | 376.4835 | 325.6133 |
| 8150  | LOC103214 | 25.04261 | 1.696142 | 0.504115 | 3.364591 | 0.000767 | 0.002501 | 10.29964 | 13.13788 | 11.82743 | 4        |          |          |



|       |           |           |          |          |          |          |          |          |          |          |          |          |          |
|-------|-----------|-----------|----------|----------|----------|----------|----------|----------|----------|----------|----------|----------|----------|
| 14856 | YJEFN3    | 8.627214  | 1.694232 | 0.91024  | 1.861302 | 0.062702 | 0.112205 | 3.252518 | 3.831883 | 4.87012  | 13.39276 | 21.39111 | 5.024897 |
| 5840  | NEFM      | 70.75474  | 1.694187 | 0.398323 | 4.253295 | 2.11E-05 | 9.59E-05 | 24.39389 | 38.31883 | 36.87376 | 82.5887  | 168.9897 | 73.3635  |
| 17042 | OXCT2     | 8.715304  | 1.693669 | 1.138841 | 1.487187 | 0.136965 | 0.213647 | 3.252518 | 0        | 9.044508 | 17.85702 | 17.11289 | 5.024897 |
| 17039 | CDX1      | 8.989266  | 1.693572 | 1.138682 | 1.487309 | 0.136933 | 0.213638 | 0        | 3.831883 | 9.044508 | 4.464254 | 23.53022 | 13.06473 |
| 463   | RALGDS    | 1759.427  | 1.693416 | 0.113344 | 14.94053 | 1.80E-50 | 1.03E-48 | 874.9274 | 856.6995 | 763.2173 | 2629.446 | 2502.759 | 2929.515 |
| 19739 | LOC103240 | 3.323307  | 1.692766 | 1.593593 | 1.062233 | 0.28813  | 0.388063 | 2.710432 | 1.094824 | 0.695731 | 11.16063 | 4.278221 | 0        |
| 14833 | TTLI9     | 8.694727  | 1.692612 | 0.907582 | 1.864969 | 0.062186 | 0.111455 | 3.794605 | 2.189647 | 6.261582 | 22.32127 | 8.556443 | 9.044815 |
| 22158 | NBPF4     | 1.130939  | 1.691217 | 2.421006 | 0.69856  | 0.484827 | 0.581692 | 1.084173 | 0.547412 | 0        | 0        | 2.139111 | 3.014938 |
| 11973 | TMEM116   | 13.37807  | 1.690903 | 0.70125  | 2.41127  | 0.015897 | 0.035298 | 8.131296 | 6.568942 | 4.174388 | 15.62489 | 25.66933 | 20.09959 |
| 713   | RBPMS     | 847.8029  | 1.690098 | 0.132987 | 12.70873 | 5.29E-37 | 1.97E-35 | 372.4133 | 460.3733 | 370.1291 | 1323.651 | 1257.797 | 1302.453 |
| 18213 | LOC103231 | 5.643868  | 1.68986  | 1.300753 | 1.29914  | 0.193896 | 0.283024 | 0        | 4.379295 | 3.478657 | 11.16063 | 12.83466 | 2.009959 |
| 17857 | LOC103214 | 4.453133  | 1.689576 | 1.235029 | 1.368045 | 0.171298 | 0.255024 | 1.626259 | 0.547412 | 4.174388 | 8.928508 | 6.417332 | 5.024897 |
| 303   | CLIP2     | 6960.616  | 1.688944 | 0.097092 | 17.39535 | 8.95E-68 | 7.85E-66 | 3367.441 | 3334.833 | 3187.841 | 10419.57 | 9799.266 | 11654.75 |
| 22574 | LOC119620 | 1.130051  | 1.688876 | 2.683872 | 0.629268 | 0.529173 | 0.623186 | 1.626259 | 0        | 0        | 0        | 2.139111 | 3.014938 |
| 11001 | LOC119621 | 17.36669  | 1.687278 | 0.641839 | 2.628819 | 0.008568 | 0.020706 | 10.29964 | 7.116354 | 6.957314 | 20.08914 | 40.6431  | 19.09461 |
| 18554 | LOC103241 | 5.151228  | 1.687044 | 1.357674 | 1.242599 | 0.214016 | 0.306651 | 0        | 1.094824 | 6.261582 | 6.696381 | 12.83466 | 4.019918 |
| 22881 | LOC103221 | 0.938925  | 1.686357 | 2.897031 | 0.582098 | 0.560501 | 0.65115  | 0        | 0        | 1.391463 | 2.232127 | 0        | 2.009959 |
| 22882 | LOC103230 | 0.938925  | 1.686357 | 2.897031 | 0.582098 | 0.560501 | 0.65115  | 0        | 0        | 1.391463 | 2.232127 | 0        | 2.009959 |
| 22883 | LOC119621 | 0.938925  | 1.686357 | 2.897031 | 0.582098 | 0.560501 | 0.65115  | 0        | 0        | 1.391463 | 2.232127 | 0        | 2.009959 |
| 22884 | LOC119620 | 0.938925  | 1.686357 | 2.897031 | 0.582098 | 0.560501 | 0.65115  | 0        | 0        | 1.391463 | 2.232127 | 0        | 2.009959 |
| 574   | EFNB1     | 3069.729  | 1.68477  | 0.121636 | 13.85092 | 1.26E-43 | 5.82E-42 | 1594.276 | 1275.47  | 1502.78  | 4734.341 | 4184.1   | 5127.405 |
| 19719 | LOC103220 | 2.784575  | 1.684765 | 1.58044  | 1.06601  | 0.286419 | 0.386148 | 1.626259 | 2.189647 | 0        | 4.464254 | 6.417332 | 2.009959 |
| 21190 | LOC103211 | 1.618022  | 1.684036 | 1.976487 | 0.852035 | 0.394195 | 0.494557 | 1.626259 | 0        | 0.695731 | 2.232127 | 2.139111 | 3.014938 |
| 20706 | LOC119621 | 1.619803  | 1.681884 | 1.829255 | 0.919437 | 0.357867 | 0.459475 | 0.542086 | 1.094824 | 0.695731 | 2.232127 | 2.139111 | 3.014938 |
| 410   | STON2     | 1654.027  | 1.681701 | 0.108182 | 15.54511 | 1.72E-54 | 1.11E-52 | 742.6583 | 862.721  | 753.4771 | 2470.965 | 2498.481 | 2595.862 |
| 3118  | SYNGR4    | 120.0108  | 1.681537 | 0.268746 | 6.256964 | 3.93E-10 | 3.35E-09 | 42.82482 | 65.14201 | 64.00729 | 167.4095 | 179.6853 | 200.9959 |
| 13222 | LOC103211 | 12.81347  | 1.681186 | 0.776752 | 2.164378 | 0.030435 | 0.061195 | 9.215468 | 6.568942 | 2.087194 | 24.5534  | 21.39111 | 13.06473 |
| 11174 | MYT1      | 25.95249  | 1.68101  | 0.649941 | 2.586402 | 0.009698 | 0.023074 | 7.047123 | 8.211177 | 21.56767 | 33.4819  | 66.31243 | 19.09461 |
| 10643 | LOC119620 | 18.9971   | 1.680863 | 0.62069  | 2.708053 | 0.006768 | 0.016905 | 5.420864 | 9.306001 | 12.52316 | 20.08914 | 38.50399 | 28.13943 |
| 16674 | LOC103231 | 5.587787  | 1.680325 | 1.087175 | 1.545588 | 0.122204 | 0.19483  | 2.168345 | 2.189647 | 3.478657 | 6.696381 | 14.97377 | 4.019918 |
| 7321  | LOC103241 | 36.30271  | 1.680191 | 0.463305 | 3.626535 | 0.000287 | 0.001043 | 11.9259  | 18.06459 | 22.2634  | 37.94616 | 66.31243 | 61.30375 |
| 667   | SCARA3    | 2263.381  | 1.679596 | 0.129141 | 13.00596 | 1.13E-38 | 4.51E-37 | 1004.486 | 1262.332 | 964.9794 | 3424.083 | 3180.858 | 3743.549 |
| 7931  | RAB37     | 362.61471 | 1.678833 | 0.489385 | 3.403496 | 0.000602 | 0.00202  | 20.0572  | 15.32753 | 10.43597 | 55.80317 | 59.8951  | 34.1693  |
| 561   | PDLM2     | 1738.796  | 1.678823 | 0.119424 | 14.05767 | 6.91E-45 | 3.28E-43 | 894.9846 | 732.437  | 857.141  | 2749.98  | 2421.473 | 2776.758 |
| 19568 | FAM110D   | 3.795555  | 1.678568 | 1.541382 | 1.089002 | 0.276153 | 0.37518  | 0        | 0.547412 | 4.87012  | 8.928508 | 6.417332 | 2.009959 |
| 19251 | LOC103241 | 3.501368  | 1.678315 | 1.466286 | 1.144603 | 0.252374 | 0.348504 | 0        | 2.189647 | 2.782925 | 4.464254 | 8.556443 | 3.014938 |
| 6612  | LOC119621 | 38.01524  | 1.67818  | 0.430459 | 3.898583 | 9.68E-05 | 0.000389 | 17.34676 | 23.53871 | 13.2189  | 55.80317 | 59.8951  | 58.28881 |
| 10420 | GAL3ST4   | 35.17502  | 1.677425 | 0.607417 | 2.761571 | 0.005752 | 0.014676 | 6.505036 | 10.40082 | 33.39511 | 60.26743 | 66.31243 | 34.1693  |
| 7205  | LOC119621 | 33.86743  | 1.677264 | 0.457558 | 3.665684 | 0.000247 | 0.00091  | 14.09425 | 18.612   | 15.30609 | 69.19594 | 42.78221 | 43.21412 |
| 307   | LGMN      | 14213.73  | 1.675916 | 0.096778 | 17.31714 | 3.49E-67 | 3.02E-65 | 6636.221 | 7211.056 | 6483.521 | 21816.81 | 19825.28 | 23309.49 |
| 451   | TRPS1     | 5602.307  | 1.674641 | 0.110995 | 15.08748 | 1.96E-51 | 1.15E-49 | 2433.426 | 3085.76  | 2498.371 | 8410.654 | 8513.66  | 8671.968 |
| 10361 | ZNFG65    | 18.58346  | 1.674548 | 0.603676 | 2.773921 | 0.005539 | 0.014211 | 9.215468 | 11.49565 | 5.565851 | 29.01765 | 32.08666 | 24.11951 |
| 15515 | LOC103231 | 7.942193  | 1.674468 | 0.962007 | 1.740598 | 0.081754 | 0.140086 | 1.626259 | 2.189647 | 7.653045 | 11.16063 | 14.97377 | 10.04979 |
| 349   | BCAM      | 3047.179  | 1.672417 | 0.101732 | 16.43939 | 9.99E-61 | 7.61E-59 | 1453.876 | 1435.314 | 1480.516 | 4629.431 | 4226.883 | 5057.057 |
| 22329 | LOC103221 | 1.426901  | 1.672179 | 2.494639 | 0.670309 | 0.502661 | 0.59847  | 0        | 0        | 2.087194 | 4.464254 | 0        | 2.009959 |
| 22217 | LOC103211 | 1.18347   | 1.671662 | 2.424073 | 0.689609 | 0.49044  | 0.586864 | 1.084173 | 0.547412 | 0        | 4.464254 | 0        | 1.004979 |
| 14317 | LOC119621 | 14.80154  | 1.671659 | 0.853688 | 1.958161 | 0.050211 | 0.093234 | 4.878777 | 1.094824 | 15.30609 | 26.78552 | 25.66933 | 15.07469 |
| 19168 | THEMIS    | 3.014811  | 1.671646 | 1.443711 | 1.157881 | 0.246913 | 0.342455 | 1.084173 | 0.547412 | 2.782925 | 2.232127 | 6.417332 | 5.024897 |
| 650   | CPT1A     | 1214.571  | 1.671645 | 0.12724  | 13.13768 | 2.00E-39 | 8.19E-38 | 602.258  | 623.5021 | 516.2327 | 1863.826 | 1670.645 | 20.0964  |
| 12644 | LOC103231 | 12.14105  | 1.671109 | 0.73554  | 2.271947 | 0.02309  | 0.048548 | 4.336691 | 6.568942 | 6.261582 | 20.08914 | 23.53022 | 12.05975 |
| 16822 | DAZL      | 7.287669  | 1.671059 | 1.098367 | 1.521403 | 0.128159 | 0.202538 | 2.710432 | 3.284471 | 4.174388 | 11.16063 | 21.39111 | 1.004979 |
| 15372 | LOC103231 | 6.966466  | 1.670621 | 0.94644  | 1.765163 | 0.077536 | 0.134095 | 4.336691 | 2.737059 | 2.782925 | 8.928508 | 14.97377 | 8.039836 |
| 4073  | LOC119621 | 71.95348  | 1.670011 | 0.314096 | 5.31689  | 1.06E-07 | 6.89E-07 | 39.5723  | 35.58177 | 27.82925 | 102.6778 | 115.512  | 110.5477 |
| 6372  | LOC103241 | 48.36739  | 1.668792 | 0.417898 | 3.993304 | 6.52E-05 | 0.000272 | 15.7205  | 30.10765 | 22.95914 | 82.5887  | 85.56443 | 53.26391 |
| 8775  | LOC119611 | 24.83426  | 1.667941 | 0.524388 | 3.180741 | 0.001469 | 0.004451 | 9.757555 | 15.32753 | 10.43597 | 31.24978 | 47.06043 | 35.17428 |
| 8532  | STAG3     | 47.6399   | 1.667464 | 0.51371  | 3.245922 | 0.001171 | 0.003648 | 9.757555 | 20.25424 | 38.26523 | 80.35657 | 91.98176 | 45.22408 |
| 14826 | LOC103221 | 7.684207  | 1.667321 | 0.892868 | 1.867377 | 0.061849 | 0.110903 | 3.252518 | 4.926706 | 2.782925 | 13.39276 | 10.69555 | 11.05477 |
| 17078 | LOC119621 | 6.259908  | 1.666971 | 1.123123 | 1.484229 | 0.137748 | 0.21443  | 0.542086 | 4.926706 | 3.478657 | 4.464254 | 17.11289 | 7.034856 |
| 18497 | FND8      | 4.946966  | 1.666578 | 1.329094 | 1.25392  | 0.209871 | 0.301974 | 0        | 1.642235 | 5.565851 | 11.16063 | 4.278221 | 7.034856 |
| 14940 | LOC119611 | 8.221163  | 1.665854 | 0.901935 | 1.846977 | 0.06475  | 0.115205 | 5.420864 | 2.737059 | 3.478657 | 20.08914 | 8.556443 | 9.044815 |
| 12434 | MMP17     | 26.81049  | 1.665676 | 0.719591 | 2.314754 | 0.020626 | 0.044101 | 6.505036 | 4.379295 | 27.82925 | 24.5534  | 68.45154 | 29.1444  |
| 13965 | LBHD2     | 10.19482  | 1.665496 | 0.824921 | 2.018976 | 0.04349  | 0.082792 | 6.505036 | 3.831883 | 4.174388 | 8.928508 | 25.66933 | 12.05975 |
| 677   | QPCT      | 651.5782  | 1.665208 | 0.128733 | 12.93538 | 2.84E-38 | 1.12E-36 | 332.2989 | 295.6024 | 310.2962 | 984.368  | 949.7651 | 1037.139 |
| 3048  | LOC103234 | 135.4412  | 1.663931 | 0.262317 | 6.343199 | 2.25E-10 | 1.96E-09 | 55.29281 | 76.63765 | 63.31155 | 158.481  | 243.8586 | 215.0656 |
| 22946 | LOC119621 | 0.923422  | 1.66337  | 2.911977 | 0.571217 | 0.567853 | 0.657822 | 0        | 0        | 1.391463 | 0        | 2.139111 | 2.009959 |
| 22947 | MRM3      | 0.923422  | 1.66337  | 2.911977 | 0.571217 | 0.567853 | 0.657822 | 0        | 0        | 1.391463 | 0        | 2.139111 | 2.009959 |
| 22948 | LOC103221 | 0.923422  | 1.66337  | 2.911977 | 0.571217 | 0.567853 | 0.657822 | 0        | 0        | 1.391463 | 0        | 2.139111 | 2.009959 |
| 22949 | LOC103211 | 0.923422  | 1.66337  | 2.911977 | 0.571217 | 0.567853 | 0.657822 | 0        | 0        | 1.391463 | 0        | 2.139111 | 2.009959 |
| 14311 | LOC103231 | 8.855308  | 1.663354 | 0.849156 | 1.958832 | 0.050132 | 0.093129 | 3.252518 | 3.284471 | 6.261582 | 11.16063 | 17.11289 | 12.05975 |
| 520   | PPP1R3B   | 2176.384  | 1.663286 | 0.115721 | 14.37323 | 7.62E-47 | 3.90E-45 | 1039.722 | 1159.966 | 934.3672 | 3316.941 | 3088.876 | 3518.433 |
| 1092  | SLC12A5   | 332.7254  | 1.662839 | 0.157741 | 10.5416  | 5.55E-26 | 1.35E-24 | 164.7943 | 156.5598 | 158.6268 | 479.9073 | 504.8301 |          |



|       |           |          |          |          |          |          |          |          |          |          |          |          |          |
|-------|-----------|----------|----------|----------|----------|----------|----------|----------|----------|----------|----------|----------|----------|
| 940   | OAS1      | 575.9695 | 1.662152 | 0.14758  | 11.26273 | 2.00E-29 | 5.67E-28 | 301.4    | 285.2016 | 244.2017 | 828.1191 | 832.114  | 964.7803 |
| 300   | EMC3      | 5792.321 | 1.661926 | 0.095116 | 17.47263 | 2.32E-68 | 2.05E-66 | 2939.734 | 2517.547 | 2888.677 | 8839.223 | 8800.301 | 8768.446 |
| 429   | VASH1     | 2537.235 | 1.660746 | 0.108409 | 15.31925 | 5.69E-53 | 3.52E-51 | 1246.257 | 1183.504 | 1232.14  | 3727.652 | 3529.533 | 4304.327 |
| 1571  | RRAGD     | 227.9516 | 1.660524 | 0.183546 | 9.046929 | 1.47E-19 | 2.49E-18 | 108.4173 | 117.6935 | 102.2725 | 348.2118 | 344.3968 | 346.7179 |
| 16276 | KLK8      | 7.498154 | 1.660113 | 1.029543 | 1.612476 | 0.106858 | 0.174541 | 1.084173 | 2.737059 | 6.957314 | 8.928508 | 19.252   | 6.029877 |
| 22302 | LOC119618 | 1.167079 | 1.659397 | 2.460096 | 0.674525 | 0.499977 | 0.595969 | 1.626259 | 0        | 0        | 2.232127 | 2.139111 | 1.004979 |
| 22303 | ZNF516-DT | 1.167079 | 1.659397 | 2.460096 | 0.674525 | 0.499977 | 0.595969 | 1.626259 | 0        | 0        | 2.232127 | 2.139111 | 1.004979 |
| 6410  | LOC103247 | 41.14756 | 1.659279 | 0.417457 | 3.97473  | 7.05E-05 | 0.000292 | 16.26259 | 24.08612 | 18.78475 | 78.12444 | 51.33866 | 58.28881 |
| 20358 | LOC103227 | 2.353212 | 1.65923  | 1.713932 | 0.968084 | 0.333002 | 0.434859 | 1.084173 | 2.189647 | 0        | 6.696381 | 2.139111 | 2.009959 |
| 16394 | SNTG2     | 6.362306 | 1.658628 | 1.043713 | 1.589161 | 0.112024 | 0.18165  | 2.168345 | 3.284471 | 3.478657 | 13.39276 | 12.83466 | 3.014938 |
| 4519  | ACKR4     | 74.44388 | 1.658575 | 0.331623 | 5.001391 | 5.69E-07 | 3.35E-06 | 27.10432 | 39.41365 | 41.04815 | 91.51721 | 139.0422 | 108.5378 |
| 15920 | LOC103227 | 6.328473 | 1.657796 | 0.986137 | 1.681101 | 0.092743 | 0.154873 | 2.168345 | 2.737059 | 4.174388 | 11.16063 | 10.69555 | 7.034856 |
| 6282  | LOC103247 | 42.15234 | 1.65686  | 0.410406 | 4.037129 | 5.41E-05 | 0.000229 | 18.43094 | 24.63353 | 17.39328 | 58.0353  | 79.14709 | 55.27387 |
| 3691  | INKA2     | 102.1275 | 1.656801 | 0.293255 | 5.649697 | 1.61E-08 | 1.16E-07 | 56.37698 | 39.41365 | 50.78839 | 158.481  | 186.1026 | 121.6025 |
| 12893 | LOC103237 | 13.8805  | 1.656341 | 0.746068 | 2.220094 | 0.026412 | 0.054462 | 8.673382 | 3.831883 | 7.653045 | 8.928508 | 32.08666 | 22.10955 |
| 21147 | LOC119627 | 2.334821 | 1.656221 | 1.929091 | 0.85855  | 0.390589 | 0.49103  | 0        | 0        | 3.478657 | 2.232127 | 4.278221 | 4.019918 |
| 7969  | MCF2L2    | 29.97826 | 1.655544 | 0.484179 | 3.419283 | 0.000628 | 0.002095 | 10.29964 | 14.23271 | 18.78475 | 53.57105 | 42.78221 | 40.19918 |
| 20770 | LOC103237 | 2.143032 | 1.655534 | 1.823587 | 0.907845 | 0.36396  | 0.465859 | 1.626259 | 0        | 1.391463 | 6.696381 | 2.139111 | 1.004979 |
| 8488  | LOC103237 | 27.30811 | 1.65489  | 0.507918 | 3.258185 | 0.001121 | 0.003511 | 16.26259 | 10.94824 | 11.82743 | 40.17829 | 53.47777 | 31.15436 |
| 20392 | CNDP1     | 2.633671 | 1.653867 | 1.717495 | 0.962953 | 0.335571 | 0.437483 | 0        | 1.642235 | 2.087194 | 8.928508 | 2.139111 | 1.004979 |
| 14215 | LOC103237 | 9.121744 | 1.653865 | 0.83769  | 1.974317 | 0.048346 | 0.090417 | 4.336691 | 2.737059 | 6.261582 | 15.62489 | 10.69555 | 15.07469 |
| 18796 | LOC103226 | 4.151773 | 1.653548 | 1.356736 | 1.218769 | 0.222932 | 0.315314 | 2.168345 | 1.094824 | 2.782925 | 0        | 12.83466 | 6.029877 |
| 17204 | LCN15     | 5.455806 | 1.652365 | 1.126195 | 1.467211 | 0.142319 | 0.219922 | 3.252518 | 1.642235 | 2.782925 | 15.62489 | 6.417332 | 3.014938 |
| 9837  | CHRNA2    | 20.39059 | 1.651763 | 0.56998  | 2.897931 | 0.003756 | 0.010152 | 7.589209 | 9.306001 | 12.52316 | 35.71403 | 32.08666 | 25.12449 |
| 22671 | LOC119627 | 1.151577 | 1.651529 | 2.70054  | 0.611555 | 0.540832 | 0.634203 | 1.626259 | 0        | 0        | 0        | 4.278221 | 1.004979 |
| 4112  | TMEM191B  | 68.14196 | 1.65054  | 0.312306 | 5.285009 | 1.26E-07 | 8.13E-07 | 33.60935 | 30.65506 | 34.78657 | 107.1421 | 94.12087 | 108.5378 |
| 17456 | CYP2E1    | 4.709558 | 1.649625 | 1.163399 | 1.417936 | 0.156209 | 0.237902 | 1.084173 | 2.189647 | 3.478657 | 8.928508 | 8.556443 | 4.019918 |
| 9061  | CDH20     | 33.59635 | 1.649432 | 0.533395 | 3.092326 | 0.001986 | 0.005827 | 16.80468 | 19.15941 | 11.82743 | 55.80317 | 74.86887 | 23.11453 |
| 21179 | LOC103218 | 2.077661 | 1.649224 | 1.932165 | 0.853563 | 0.393347 | 0.49375  | 0        | 1.642235 | 1.391463 | 0        | 6.417332 | 3.014938 |
| 18136 | LOC119618 | 4.988468 | 1.649221 | 1.253956 | 1.315215 | 0.188438 | 0.276225 | 3.794605 | 1.094824 | 2.087194 | 13.39276 | 8.556443 | 1.004979 |
| 11807 | LOC103237 | 25.00206 | 1.648779 | 0.673615 | 2.44766  | 0.014379 | 0.032375 | 11.9259  | 13.13788 | 10.43597 | 66.96381 | 38.50399 | 9.044815 |
| 22328 | F9        | 1.169742 | 1.648656 | 2.458886 | 0.670489 | 0.502546 | 0.598377 | 0        | 1.642235 | 0        | 2.232127 | 2.139111 | 1.004979 |
| 502   | GABRA2    | 3040.151 | 1.648355 | 0.112718 | 14.62375 | 1.98E-48 | 1.05E-46 | 1349.795 | 1684.386 | 1377.548 | 4495.504 | 4601.227 | 4732.448 |
| 665   | PBP2R2B   | 1135.004 | 1.648233 | 0.126403 | 13.03956 | 7.29E-39 | 2.91E-37 | 538.8339 | 624.0495 | 483.5333 | 1691.952 | 1271.984 | 1749.669 |
| 1225  | LOC119627 | 371.786  | 1.647985 | 0.163417 | 10.08454 | 6.47E-24 | 1.40E-22 | 171.8414 | 172.4347 | 196.892  | 589.2815 | 496.2737 | 603.9927 |
| 22041 | LOC103236 | 1.828739 | 1.647982 | 2.295141 | 0.718031 | 0.472738 | 0.570155 | 2.710432 | 0        | 0        | 2.232127 | 0        | 6.029877 |
| 21576 | SST       | 1.883872 | 1.64769  | 2.078553 | 0.79271  | 0.427947 | 0.527297 | 0        | 0        | 2.782925 | 2.232127 | 4.278221 | 2.009959 |
| 19785 | UTS2      | 2.583448 | 1.647545 | 1.560476 | 1.055796 | 0.291061 | 0.391098 | 0.542086 | 0.547412 | 2.782925 | 4.464254 | 2.139111 | 5.024897 |
| 16773 | LOC119627 | 5.929168 | 1.647534 | 1.076909 | 1.529874 | 0.126048 | 0.199785 | 2.710432 | 2.189647 | 3.478657 | 15.62489 | 8.556443 | 3.014938 |
| 20760 | LOC119627 | 2.547472 | 1.646711 | 1.809837 | 0.909867 | 0.362893 | 0.464716 | 1.626259 | 0        | 2.087194 | 0        | 8.556443 | 3.014938 |
| 407   | PML       | 2991.023 | 1.64637  | 0.105567 | 15.59556 | 7.80E-55 | 5.10E-53 | 1338.411 | 1562.861 | 1446.426 | 4363.808 | 4342.395 | 4892.24  |
| 10140 | LOC103218 | 23.22225 | 1.646267 | 0.581801 | 2.829604 | 0.004661 | 0.012219 | 9.757555 | 6.02153  | 18.08902 | 37.94616 | 36.36488 | 31.15436 |
| 11335 | LOC119627 | 16.37149 | 1.645791 | 0.6456   | 2.549242 | 0.010796 | 0.02532  | 4.878777 | 10.40082 | 8.348776 | 24.5534  | 29.94755 | 20.09959 |
| 3981  | FAM78A    | 80.64138 | 1.645616 | 0.305388 | 5.3886   | 7.10E-08 | 4.74E-07 | 34.69353 | 36.12918 | 45.91827 | 138.3919 | 126.2075 | 102.5079 |
| 7132  | LOC103218 | 36.56843 | 1.6453   | 0.446423 | 3.685514 | 0.000228 | 0.000851 | 16.80468 | 23.53871 | 12.52316 | 49.10679 | 64.17332 | 53.26391 |
| 550   | LGR4      | 3720.589 | 1.643778 | 0.116312 | 14.13253 | 2.39E-45 | 1.16E-43 | 1725.461 | 2070.859 | 1616.184 | 5299.069 | 5666.504 | 5945.459 |
| 12317 | CD226     | 13.52941 | 1.643586 | 0.701645 | 2.342475 | 0.019156 | 0.041349 | 4.336691 | 7.663765 | 7.653045 | 15.62489 | 27.80844 | 18.08963 |
| 21987 | CRCT1     | 1.167967 | 1.643    | 2.251572 | 0.729712 | 0.465566 | 0.562915 | 1.084173 | 0.547412 | 0        | 2.232127 | 2.139111 | 1.004979 |
| 19369 | FBXO39    | 2.824798 | 1.642294 | 1.45984  | 1.124982 | 0.260597 | 0.357683 | 1.626259 | 1.642235 | 0.695731 | 6.696381 | 4.278221 | 2.009959 |
| 5443  | LOC119627 | 59.2934  | 1.642134 | 0.369665 | 4.442222 | 8.90E-06 | 4.35E-05 | 20.0572  | 38.31883 | 27.82925 | 82.5887  | 100.5382 | 86.42823 |
| 3438  | LOC119627 | 144.917  | 1.640677 | 0.277529 | 5.911733 | 3.39E-09 | 2.62E-08 | 50.95612 | 85.39624 | 73.74753 | 225.4448 | 263.1106 | 170.8465 |
| 22706 | LOC119627 | 1.154239 | 1.640225 | 2.698964 | 0.607724 | 0.543371 | 0.63617  | 0        | 1.642235 | 0        | 0        | 4.278221 | 1.004979 |
| 13598 | LOC103237 | 10.2639  | 1.639937 | 0.784674 | 2.08996  | 0.036621 | 0.071597 | 7.047123 | 4.379295 | 3.478657 | 15.62489 | 14.97377 | 16.07967 |
| 21996 | TRNAD-GU  | 1.168855 | 1.639631 | 2.251216 | 0.728331 | 0.466411 | 0.563692 | 0.542086 | 1.094824 | 0        | 2.232127 | 2.139111 | 1.004979 |
| 13425 | LOC103246 | 10.94744 | 1.639521 | 0.772582 | 2.122133 | 0.033827 | 0.066985 | 5.96295  | 7.116354 | 2.782925 | 15.62489 | 17.11289 | 17.08465 |
| 14348 | FXYD1     | 15.1339  | 1.637688 | 0.838675 | 1.95271  | 0.050854 | 0.094226 | 3.252518 | 2.189647 | 16.69755 | 26.78552 | 27.80844 | 14.06971 |
| 6483  | ENKUR     | 45.12611 | 1.637483 | 0.414877 | 3.946908 | 7.92E-05 | 0.000325 | 15.7205  | 27.37059 | 22.2634  | 84.82083 | 66.31243 | 54.26889 |
| 19621 | GPX5      | 2.81107  | 1.637221 | 1.512656 | 1.082348 | 0.279098 | 0.378137 | 0.542086 | 2.737059 | 0.695731 | 4.464254 | 6.417332 | 2.009959 |
| 439   | ATP6V1B2  | 3194.794 | 1.637131 | 0.107633 | 15.21031 | 3.02E-52 | 1.83E-50 | 1654.99  | 1507.572 | 1504.171 | 4660.681 | 4470.741 | 5370.61  |
| 22327 | LOC119627 | 1.152464 | 1.636869 | 2.441389 | 0.670466 | 0.502561 | 0.598377 | 1.084173 | 0.547412 | 0        | 0        | 4.278221 | 1.004979 |
| 17708 | TMEM229B  | 4.924872 | 1.63676  | 1.183366 | 1.38314  | 0.166622 | 0.250135 | 1.084173 | 3.831883 | 2.087194 | 6.696381 | 12.83466 | 3.014938 |
| 1626  | HSD17B14  | 278.4908 | 1.636717 | 0.183712 | 8.909169 | 5.14E-19 | 8.41E-18 | 150.7    | 119.8832 | 135.6676 | 468.7467 | 382.9008 | 413.0466 |
| 13048 | LOC119627 | 11.66529 | 1.63617  | 0.74501  | 2.196173 | 0.02808  | 0.057211 | 5.420864 | 6.568942 | 4.87012  | 13.39276 | 25.66933 | 14.06971 |
| 11177 | SLC25A41  | 17.86527 | 1.63615  | 0.632693 | 2.586008 | 0.009709 | 0.023094 | 5.420864 | 9.306001 | 11.1317  | 29.01765 | 34.22577 | 18.08963 |
| 14310 | CHRNA3    | 11.59431 | 1.634857 | 0.834514 | 1.959053 | 0.050107 | 0.093088 | 4.878777 | 2.189647 | 9.740239 | 22.32127 | 21.39111 | 9.044815 |
| 7061  | APOC2     | 36.74362 | 1.634775 | 0.440947 | 3.707416 | 0.000209 | 0.000788 | 18.97302 | 13.6853  | 20.87194 | 49.10679 | 70.59065 | 47.23404 |
| 2527  | LOC103238 | 147.3656 | 1.634721 | 0.230703 | 7.085832 | 1.38E-12 | 1.45E-11 | 77.51835 | 62.40495 | 75.13899 | 209.8199 | 250.2759 | 209.0357 |
| 17289 | LOC103238 | 5.396458 | 1.634401 | 1.126506 | 1.450859 | 0.146819 | 0.225761 | 1.626259 | 3.284471 | 2.782925 | 6.696381 | 14.97377 | 3.014938 |
| 14437 | TMEM253   | 11.633   | 1.634105 | 0.843588 | 1.93709  | 0.052734 | 0.097108 | 1.626259 | 6.568942 | 9.044508 | 8.928508 | 23.53022 | 20.09959 |
| 6589  | LOC119627 | 41.07667 | 1.633513 | 0.418293 | 3.905187 | 9.42E-05 | 0.00038  | 21.68345 | 20.80165 | 17.39328 | 80.35657 | 44.92132 | 61.30375 |



|       |           |          |          |          |          |          |          |          |          |          |          |          |          |
|-------|-----------|----------|----------|----------|----------|----------|----------|----------|----------|----------|----------|----------|----------|
| 23035 | LOC119620 | 0.96045  | 1.632428 | 2.934856 | 0.556221 | 0.57806  | 0.667089 | 0        | 0        | 1.391463 | 2.232127 | 2.139111 | 0        |
| 23036 | LOC10323  | 0.96045  | 1.632428 | 2.934856 | 0.556221 | 0.57806  | 0.667089 | 0        | 0        | 1.391463 | 2.232127 | 2.139111 | 0        |
| 23037 | LOC11962  | 0.96045  | 1.632428 | 2.934856 | 0.556221 | 0.57806  | 0.667089 | 0        | 0        | 1.391463 | 2.232127 | 2.139111 | 0        |
| 23038 | LOC10324  | 0.96045  | 1.632428 | 2.934856 | 0.556221 | 0.57806  | 0.667089 | 0        | 0        | 1.391463 | 2.232127 | 2.139111 | 0        |
| 6124  | ILDR1     | 45.73087 | 1.631875 | 0.397326 | 4.107143 | 4.01E-05 | 0.000174 | 22.76763 | 21.89647 | 21.56767 | 69.19594 | 87.70354 | 51.25395 |
| 452   | EPAS1     | 1753.26  | 1.631501 | 0.108303 | 15.06429 | 2.78E-51 | 1.64E-49 | 853.786  | 916.9148 | 796.6124 | 2707.57  | 2474.951 | 2769.723 |
| 20317 | TCN1      | 2.129305 | 1.631359 | 1.672588 | 0.97535  | 0.329387 | 0.431006 | 0.542086 | 1.094824 | 1.391463 | 4.464254 | 4.278221 | 1.004979 |
| 1490  | SPTSSB    | 270.2121 | 1.631058 | 0.175993 | 9.267756 | 1.90E-20 | 3.39E-19 | 134.9795 | 129.1892 | 132.8847 | 401.7829 | 372.2053 | 450.2308 |
| 2412  | AK5       | 168.058  | 1.630121 | 0.22464  | 7.256607 | 3.97E-13 | 4.37E-12 | 72.63957 | 98.53413 | 74.44326 | 249.9982 | 269.5279 | 243.205  |
| 17125 | LOC10323  | 7.811002 | 1.630052 | 1.103445 | 1.477239 | 0.139612 | 0.216732 | 3.794605 | 0.547412 | 6.957314 | 11.16063 | 21.39111 | 3.014938 |
| 18698 | LOC10323  | 3.301354 | 1.62934  | 1.325693 | 1.229047 | 0.219054 | 0.311453 | 1.084173 | 1.642235 | 2.087194 | 6.696381 | 4.278221 | 4.019918 |
| 14360 | DNAAF6    | 11.4494  | 1.629245 | 0.835561 | 1.949882 | 0.05119  | 0.09477  | 6.505036 | 7.116354 | 2.782925 | 11.16063 | 32.08666 | 9.044815 |
| 1814  | LOC11962  | 1381.054 | 1.629148 | 0.193538 | 8.417727 | 3.84E-17 | 5.63E-16 | 859.2069 | 477.3431 | 685.9911 | 2120.521 | 2425.751 | 1717.51  |
| 289   | PLA2R1    | 6283.908 | 1.628632 | 0.092381 | 17.6296  | 1.46E-69 | 1.34E-67 | 3159.279 | 3174.989 | 2881.024 | 9113.774 | 9294.436 | 10079.94 |
| 20504 | AADACL4   | 2.587163 | 1.628445 | 1.722748 | 0.94526  | 0.344526 | 0.446704 | 0        | 1.642235 | 2.087194 | 2.232127 | 8.556443 | 1.004979 |
| 7176  | APOC4     | 39.92304 | 1.627892 | 0.443217 | 3.672905 | 0.00024  | 0.000888 | 19.51511 | 13.13788 | 25.74206 | 58.0353  | 74.86887 | 48.23901 |
| 12367 | LOC11962  | 12.4229  | 1.627885 | 0.699049 | 2.328712 | 0.019874 | 0.04272  | 6.505036 | 5.474118 | 6.261582 | 20.08914 | 17.11289 | 19.09461 |
| 12956 | LOC11962  | 13.34842 | 1.627256 | 0.735646 | 2.212009 | 0.026966 | 0.055326 | 8.673382 | 4.379295 | 6.261582 | 15.62489 | 32.08666 | 13.06473 |
| 22514 | CAVIN2    | 1.432924 | 1.627067 | 2.551197 | 0.637766 | 0.523626 | 0.61825  | 0        | 0        | 2.087194 | 2.232127 | 4.278221 | 0        |
| 22515 | LOC10322  | 1.432924 | 1.627067 | 2.551197 | 0.637766 | 0.523626 | 0.61825  | 0        | 0        | 2.087194 | 2.232127 | 4.278221 | 0        |
| 22518 | FAM243A   | 1.432924 | 1.627067 | 2.551197 | 0.637766 | 0.523626 | 0.61825  | 0        | 0        | 2.087194 | 2.232127 | 4.278221 | 0        |
| 2152  | RAPGEF3   | 203.866  | 1.627031 | 0.21188  | 7.679031 | 1.60E-14 | 1.98E-13 | 113.8381 | 79.92212 | 105.7512 | 292.4086 | 318.7275 | 312.5486 |
| 13987 | CFAP221   | 10.24158 | 1.626774 | 0.808233 | 2.012753 | 0.044141 | 0.083898 | 5.420864 | 6.02153  | 3.478657 | 8.928508 | 23.53022 | 14.06971 |
| 11888 | LOC10324  | 15.74619 | 1.626265 | 0.669719 | 2.428279 | 0.015171 | 0.033926 | 6.505036 | 11.49565 | 4.87012  | 31.24978 | 19.252   | 21.10457 |
| 22181 | MHC-DQA   | 1.905397 | 1.624818 | 2.339514 | 0.694511 | 0.487362 | 0.584101 | 0        | 0        | 2.782925 | 2.232127 | 6.417332 | 0        |
| 16678 | LRRN2     | 6.309879 | 1.624786 | 1.0514   | 1.545354 | 0.122261 | 0.194885 | 2.168345 | 1.642235 | 5.565851 | 4.464254 | 14.97377 | 9.044815 |
| 21711 | LOC11962  | 1.659138 | 1.624579 | 2.092514 | 0.776377 | 0.437527 | 0.535749 | 1.084173 | 0        | 1.391463 | 4.464254 | 0        | 3.014938 |
| 3353  | LOC11962  | 95.27141 | 1.624131 | 0.271161 | 5.989539 | 2.10E-09 | 1.67E-08 | 41.74065 | 45.98259 | 52.17985 | 147.3204 | 149.7377 | 134.6672 |
| 18539 | LOC10323  | 3.75655  | 1.62403  | 1.303552 | 1.24585  | 0.21282  | 0.305184 | 2.168345 | 0.547412 | 2.782925 | 4.464254 | 8.556443 | 4.019918 |
| 20437 | SLC15A5   | 2.113802 | 1.623727 | 1.6982   | 0.956146 | 0.338998 | 0.440978 | 0.542086 | 1.094824 | 1.391463 | 2.232127 | 6.417332 | 1.004979 |
| 14567 | LOC11962  | 9.876771 | 1.622981 | 0.848813 | 1.912059 | 0.055869 | 0.101961 | 2.710432 | 6.02153  | 5.565851 | 13.39276 | 23.53022 | 8.039836 |
| 20389 | CES4A     | 2.552442 | 1.622951 | 1.684739 | 0.963325 | 0.335385 | 0.43731  | 0.542086 | 0.547412 | 2.782925 | 0        | 6.417332 | 5.024897 |
| 6093  | PPFIBP2   | 62.95646 | 1.62283  | 0.393372 | 4.125429 | 3.70E-05 | 0.000161 | 23.8518  | 33.93953 | 34.09084 | 80.35657 | 141.1813 | 64.31869 |
| 9265  | LOC11962  | 30.08073 | 1.622354 | 0.533548 | 3.040689 | 0.00236  | 0.006773 | 16.26259 | 7.663765 | 20.17621 | 40.17829 | 62.03421 | 34.1693  |
| 12760 | CARNS1    | 15.64809 | 1.621368 | 0.721226 | 2.248073 | 0.024572 | 0.051194 | 7.047123 | 7.116354 | 8.348776 | 31.24978 | 32.08666 | 8.039836 |
| 948   | GUCY1B1   | 1224.52  | 1.620782 | 0.14456  | 11.21184 | 3.57E-29 | 1.00E-27 | 536.6655 | 736.2689 | 528.7558 | 1859.362 | 1861.026 | 1825.043 |
| 449   | PLEKHO2   | 1912.309 | 1.620527 | 0.107248 | 15.11008 | 1.39E-51 | 8.23E-50 | 998.5231 | 913.6303 | 905.8422 | 2850.426 | 2691.001 | 3114.431 |
| 5893  | LOC11962  | 60.20588 | 1.620091 | 0.384028 | 4.218673 | 2.46E-05 | 0.000111 | 34.15144 | 18.06459 | 36.17803 | 91.51721 | 106.9555 | 74.36848 |
| 426   | AHNAK2    | 22310.7  | 1.620011 | 0.105574 | 15.34476 | 3.84E-53 | 2.40E-51 | 10497.5  | 11381.79 | 10985.6  | 32365.84 | 30383.93 | 38249.52 |
| 11050 | CHRD12    | 33.03255 | 1.619842 | 0.619295 | 2.615624 | 0.008906 | 0.021428 | 13.01007 | 8.758589 | 26.43779 | 58.0353  | 74.86887 | 17.08465 |
| 528   | PLEKHH2   | 3972.964 | 1.619778 | 0.113425 | 14.28056 | 2.89E-46 | 1.46E-44 | 1922.78  | 2226.324 | 1701.759 | 5955.315 | 6008.762 | 6022.842 |
| 1065  | LOC10321  | 910.391  | 1.619618 | 0.151757 | 10.67243 | 1.37E-26 | 3.42E-25 | 491.6723 | 369.503  | 482.8376 | 1285.705 | 1274.91  | 1557.718 |
| 13984 | MCF2      | 12.31237 | 1.618473 | 0.803899 | 2.013279 | 0.044085 | 0.083811 | 4.336691 | 7.116354 | 6.261582 | 22.32127 | 27.80844 | 6.029877 |
| 26638 | LOC11962  | 0.447754 | 1.617593 | 4.067273 | 0.397709 | 0.690844 | NA       | 0        | 0.547412 | 0        | 0        | 2.139111 | 0        |
| 26643 | LOC11962  | 0.447754 | 1.617593 | 4.067273 | 0.397709 | 0.690844 | NA       | 0        | 0.547412 | 0        | 0        | 2.139111 | 0        |
| 26651 | LOC11962  | 0.487976 | 1.617593 | 4.067273 | 0.397709 | 0.690844 | NA       | 0        | 0        | 0.695731 | 2.232127 | 0        | 0        |
| 26695 | LOC11961  | 0.463256 | 1.617593 | 4.067273 | 0.397709 | 0.690844 | NA       | 0        | 0.547412 | 0        | 2.232127 | 0        | 0        |
| 26705 | LOC11962  | 0.472474 | 1.617593 | 4.067273 | 0.397709 | 0.690844 | NA       | 0        | 0        | 0.695731 | 0        | 2.139111 | 0        |
| 26707 | LOC11962  | 0.472474 | 1.617593 | 4.067273 | 0.397709 | 0.690844 | NA       | 0        | 0        | 0.695731 | 0        | 2.139111 | 0        |
| 26730 | LOC11961  | 0.463256 | 1.617593 | 4.067273 | 0.397709 | 0.690844 | NA       | 0        | 0.547412 | 0        | 2.232127 | 0        | 0        |
| 26873 | LOC11962  | 0.487976 | 1.617593 | 4.067273 | 0.397709 | 0.690844 | NA       | 0        | 0        | 0.695731 | 2.232127 | 0        | 0        |
| 26879 | LOC10323  | 0.447754 | 1.617593 | 4.067273 | 0.397709 | 0.690844 | NA       | 0        | 0.547412 | 0        | 0        | 2.139111 | 0        |
| 26910 | LOC10322  | 0.472474 | 1.617593 | 4.067273 | 0.397709 | 0.690844 | NA       | 0        | 0        | 0.695731 | 0        | 2.139111 | 0        |
| 26950 | TRNAN-GL  | 0.472474 | 1.617593 | 4.067273 | 0.397709 | 0.690844 | NA       | 0        | 0        | 0.695731 | 0        | 2.139111 | 0        |
| 26958 | TRNAN-GL  | 0.462369 | 1.617593 | 4.067273 | 0.397709 | 0.690844 | NA       | 0.542086 | 0        | 0        | 2.232127 | 0        | 0        |
| 26959 | TRNAE-CU  | 0.447754 | 1.617593 | 4.067273 | 0.397709 | 0.690844 | NA       | 0        | 0.547412 | 0        | 0        | 2.139111 | 0        |
| 26986 | LOC11962  | 0.472474 | 1.617593 | 4.067273 | 0.397709 | 0.690844 | NA       | 0        | 0        | 0.695731 | 0        | 2.139111 | 0        |
| 27113 | LOC10324  | 0.472474 | 1.617593 | 4.067273 | 0.397709 | 0.690844 | NA       | 0        | 0        | 0.695731 | 0        | 2.139111 | 0        |
| 27118 | LOC10324  | 0.487976 | 1.617593 | 4.067273 | 0.397709 | 0.690844 | NA       | 0        | 0        | 0.695731 | 2.232127 | 0        | 0        |
| 27156 | LOC11962  | 0.472474 | 1.617593 | 4.067273 | 0.397709 | 0.690844 | NA       | 0        | 0        | 0.695731 | 0        | 2.139111 | 0        |
| 27194 | LOC11962  | 0.446866 | 1.617593 | 4.067273 | 0.397709 | 0.690844 | NA       | 0.542086 | 0        | 0        | 0        | 2.139111 | 0        |
| 27205 | LOC11962  | 0.463256 | 1.617593 | 4.067273 | 0.397709 | 0.690844 | NA       | 0        | 0.547412 | 0        | 2.232127 | 0        | 0        |
| 27254 | LOC11962  | 0.472474 | 1.617593 | 4.067273 | 0.397709 | 0.690844 | NA       | 0        | 0        | 0.695731 | 0        | 2.139111 | 0        |
| 27300 | LOC11962  | 0.462369 | 1.617593 | 4.067273 | 0.397709 | 0.690844 | NA       | 0.542086 | 0        | 0        | 2.232127 | 0        | 0        |
| 27313 | TRNAG-GC  | 0.447754 | 1.617593 | 4.067273 | 0.397709 | 0.690844 | NA       | 0        | 0.547412 | 0        | 0        | 2.139111 | 0        |
| 27331 | LOC10323  | 0.463256 | 1.617593 | 4.067273 | 0.397709 | 0.690844 | NA       | 0        | 0.547412 | 0        | 2.232127 | 0        | 0        |
| 27341 | LOC11962  | 0.487976 | 1.617593 | 4.067273 | 0.397709 | 0.690844 | NA       | 0        | 0        | 0.695731 | 2.232127 | 0        | 0        |
| 27391 | LOC10322  | 0.447754 | 1.617593 | 4.067273 | 0.397709 | 0.690844 | NA       | 0        | 0.547412 | 0        | 0        | 2.139111 | 0        |
| 27392 | LOC10322  | 0.472474 | 1.617593 | 4.067273 | 0.397709 | 0.690844 | NA       | 0        | 0        | 0.695731 | 0        | 2.139111 | 0        |
| 27398 | LOC11962  | 0.487976 | 1.617593 | 4.067273 | 0.397709 | 0.690844 | NA       | 0        | 0        | 0.695731 | 2.232127 | 0        | 0        |
| 27402 | CCDC54    | 0.447754 | 1.617593 | 4.067273 | 0.397709 | 0.690844 | NA       | 0        | 0.547412 | 0        | 0        | 2.139111 | 0        |
| 27457 | LOC11962  | 0.472474 | 1.617593 | 4.067273 | 0.397709 | 0.690844 | NA       | 0        | 0        | 0.695731 | 0        | 2.139111 | 0        |
| 27513 | LOC11962  | 0.472474 | 1.617593 | 4.067273 | 0.397709 | 0.690844 | NA       | 0        | 0        | 0.695731 | 0        | 2.139111 | 0        |
| 27523 | LOC11962  | 0.487976 | 1.617593 | 4.067273 | 0.397709 | 0.690844 | NA       | 0        | 0        | 0.695731 | 2.232127 | 0        | 0        |



|       |           |          |          |          |          |          |    |          |          |          |          |          |   |
|-------|-----------|----------|----------|----------|----------|----------|----|----------|----------|----------|----------|----------|---|
| 27528 | LOC11962  | 0.472474 | 1.617593 | 4.067273 | 0.397709 | 0.690844 | NA | 0        | 0        | 0.695731 | 0        | 2.139111 | 0 |
| 27551 | LOC11962  | 0.463256 | 1.617593 | 4.067273 | 0.397709 | 0.690844 | NA | 0        | 0.547412 | 0        | 2.232127 | 0        | 0 |
| 27585 | LOC10324  | 0.447754 | 1.617593 | 4.067273 | 0.397709 | 0.690844 | NA | 0        | 0.547412 | 0        | 0        | 2.139111 | 0 |
| 27597 | OR5Z21    | 0.472474 | 1.617593 | 4.067273 | 0.397709 | 0.690844 | NA | 0        | 0        | 0.695731 | 0        | 2.139111 | 0 |
| 27600 | LOC10324  | 0.487976 | 1.617593 | 4.067273 | 0.397709 | 0.690844 | NA | 0        | 0        | 0.695731 | 2.232127 | 0        | 0 |
| 27615 | LOC11962  | 0.472474 | 1.617593 | 4.067273 | 0.397709 | 0.690844 | NA | 0        | 0        | 0.695731 | 0        | 2.139111 | 0 |
| 27645 | TRNAI-AAI | 0.487976 | 1.617593 | 4.067273 | 0.397709 | 0.690844 | NA | 0        | 0        | 0.695731 | 2.232127 | 0        | 0 |
| 27661 | TRNAA-AG  | 0.446866 | 1.617593 | 4.067273 | 0.397709 | 0.690844 | NA | 0.542086 | 0        | 0        | 0        | 2.139111 | 0 |
| 27713 | LOC11962  | 0.462369 | 1.617593 | 4.067273 | 0.397709 | 0.690844 | NA | 0.542086 | 0        | 0        | 2.232127 | 0        | 0 |
| 27815 | LOC11962  | 0.447754 | 1.617593 | 4.067273 | 0.397709 | 0.690844 | NA | 0        | 0.547412 | 0        | 0        | 2.139111 | 0 |
| 27834 | LOC11962  | 0.472474 | 1.617593 | 4.067273 | 0.397709 | 0.690844 | NA | 0        | 0        | 0.695731 | 0        | 2.139111 | 0 |
| 27840 | LOC10323  | 0.462369 | 1.617593 | 4.067273 | 0.397709 | 0.690844 | NA | 0.542086 | 0        | 0        | 2.232127 | 0        | 0 |
| 27869 | LOC11962  | 0.463256 | 1.617593 | 4.067273 | 0.397709 | 0.690844 | NA | 0        | 0.547412 | 0        | 2.232127 | 0        | 0 |
| 27892 | LOC11962  | 0.447754 | 1.617593 | 4.067273 | 0.397709 | 0.690844 | NA | 0        | 0.547412 | 0        | 0        | 2.139111 | 0 |
| 27896 | LOC11962  | 0.487976 | 1.617593 | 4.067273 | 0.397709 | 0.690844 | NA | 0        | 0        | 0.695731 | 2.232127 | 0        | 0 |
| 27933 | LOC11962  | 0.463256 | 1.617593 | 4.067273 | 0.397709 | 0.690844 | NA | 0        | 0.547412 | 0        | 2.232127 | 0        | 0 |
| 27944 | LOC11962  | 0.472474 | 1.617593 | 4.067273 | 0.397709 | 0.690844 | NA | 0        | 0        | 0.695731 | 0        | 2.139111 | 0 |
| 27960 | LOC11962  | 0.472474 | 1.617593 | 4.067273 | 0.397709 | 0.690844 | NA | 0        | 0        | 0.695731 | 0        | 2.139111 | 0 |
| 27965 | LOC10324  | 0.447754 | 1.617593 | 4.067273 | 0.397709 | 0.690844 | NA | 0        | 0.547412 | 0        | 0        | 2.139111 | 0 |
| 28014 | LOC11961  | 0.447754 | 1.617593 | 4.067273 | 0.397709 | 0.690844 | NA | 0        | 0.547412 | 0        | 0        | 2.139111 | 0 |
| 28037 | LOC11961  | 0.447754 | 1.617593 | 4.067273 | 0.397709 | 0.690844 | NA | 0        | 0.547412 | 0        | 0        | 2.139111 | 0 |
| 28083 | SPINT3    | 0.487976 | 1.617593 | 4.067273 | 0.397709 | 0.690844 | NA | 0        | 0        | 0.695731 | 2.232127 | 0        | 0 |
| 28106 | DEFB118   | 0.447754 | 1.617593 | 4.067273 | 0.397709 | 0.690844 | NA | 0        | 0.547412 | 0        | 0        | 2.139111 | 0 |
| 28113 | LOC11961  | 0.472474 | 1.617593 | 4.067273 | 0.397709 | 0.690844 | NA | 0        | 0        | 0.695731 | 0        | 2.139111 | 0 |
| 28123 | LOC11961  | 0.463256 | 1.617593 | 4.067273 | 0.397709 | 0.690844 | NA | 0        | 0.547412 | 0        | 2.232127 | 0        | 0 |
| 28157 | LOC10321  | 0.463256 | 1.617593 | 4.067273 | 0.397709 | 0.690844 | NA | 0        | 0.547412 | 0        | 2.232127 | 0        | 0 |
| 28175 | CUNH8orf  | 0.463256 | 1.617593 | 4.067273 | 0.397709 | 0.690844 | NA | 0        | 0.547412 | 0        | 2.232127 | 0        | 0 |
| 28192 | FSCB      | 0.487976 | 1.617593 | 4.067273 | 0.397709 | 0.690844 | NA | 0        | 0        | 0.695731 | 2.232127 | 0        | 0 |
| 28205 | LOC11961  | 0.463256 | 1.617593 | 4.067273 | 0.397709 | 0.690844 | NA | 0        | 0.547412 | 0        | 2.232127 | 0        | 0 |
| 28226 | LOC11961  | 0.447754 | 1.617593 | 4.067273 | 0.397709 | 0.690844 | NA | 0        | 0.547412 | 0        | 0        | 2.139111 | 0 |
| 28258 | LOC11961  | 0.472474 | 1.617593 | 4.067273 | 0.397709 | 0.690844 | NA | 0        | 0        | 0.695731 | 0        | 2.139111 | 0 |
| 28267 | LOC10321  | 0.487976 | 1.617593 | 4.067273 | 0.397709 | 0.690844 | NA | 0        | 0        | 0.695731 | 2.232127 | 0        | 0 |
| 28290 | LOC10322  | 0.472474 | 1.617593 | 4.067273 | 0.397709 | 0.690844 | NA | 0        | 0        | 0.695731 | 0        | 2.139111 | 0 |
| 28292 | LOC11961  | 0.472474 | 1.617593 | 4.067273 | 0.397709 | 0.690844 | NA | 0        | 0        | 0.695731 | 0        | 2.139111 | 0 |
| 28322 | LOC11961  | 0.472474 | 1.617593 | 4.067273 | 0.397709 | 0.690844 | NA | 0        | 0        | 0.695731 | 0        | 2.139111 | 0 |
| 28324 | LOC11961  | 0.447754 | 1.617593 | 4.067273 | 0.397709 | 0.690844 | NA | 0        | 0.547412 | 0        | 0        | 2.139111 | 0 |
| 28359 | HIST3H3   | 0.462369 | 1.617593 | 4.067273 | 0.397709 | 0.690844 | NA | 0.542086 | 0        | 0        | 2.232127 | 0        | 0 |
| 28392 | RGS13     | 0.447754 | 1.617593 | 4.067273 | 0.397709 | 0.690844 | NA | 0        | 0.547412 | 0        | 0        | 2.139111 | 0 |
| 28425 | LOC10323  | 0.487976 | 1.617593 | 4.067273 | 0.397709 | 0.690844 | NA | 0        | 0        | 0.695731 | 2.232127 | 0        | 0 |
| 28427 | LOC11961  | 0.472474 | 1.617593 | 4.067273 | 0.397709 | 0.690844 | NA | 0        | 0        | 0.695731 | 0        | 2.139111 | 0 |
| 28429 | LOC10323  | 0.463256 | 1.617593 | 4.067273 | 0.397709 | 0.690844 | NA | 0        | 0.547412 | 0        | 2.232127 | 0        | 0 |
| 28455 | LOC10323  | 0.462369 | 1.617593 | 4.067273 | 0.397709 | 0.690844 | NA | 0.542086 | 0        | 0        | 2.232127 | 0        | 0 |
| 28546 | LOC10324  | 0.487976 | 1.617593 | 4.067273 | 0.397709 | 0.690844 | NA | 0        | 0        | 0.695731 | 2.232127 | 0        | 0 |
| 28550 | LOC11962  | 0.462369 | 1.617593 | 4.067273 | 0.397709 | 0.690844 | NA | 0.542086 | 0        | 0        | 2.232127 | 0        | 0 |
| 28569 | LOC10323  | 0.472474 | 1.617593 | 4.067273 | 0.397709 | 0.690844 | NA | 0        | 0        | 0.695731 | 0        | 2.139111 | 0 |
| 28579 | LOC10323  | 0.472474 | 1.617593 | 4.067273 | 0.397709 | 0.690844 | NA | 0        | 0        | 0.695731 | 0        | 2.139111 | 0 |
| 28718 | LOC11962  | 0.487976 | 1.617593 | 4.067273 | 0.397709 | 0.690844 | NA | 0        | 0        | 0.695731 | 2.232127 | 0        | 0 |
| 28740 | LOC11962  | 0.487976 | 1.617593 | 4.067273 | 0.397709 | 0.690844 | NA | 0        | 0        | 0.695731 | 2.232127 | 0        | 0 |
| 28741 | MAGEA10   | 0.463256 | 1.617593 | 4.067273 | 0.397709 | 0.690844 | NA | 0        | 0.547412 | 0        | 2.232127 | 0        | 0 |
| 28799 | LOC11962  | 0.472474 | 1.617593 | 4.067273 | 0.397709 | 0.690844 | NA | 0        | 0        | 0.695731 | 0        | 2.139111 | 0 |
| 28807 | TNFRSF17  | 0.462369 | 1.617593 | 4.067273 | 0.397709 | 0.690844 | NA | 0.542086 | 0        | 0        | 2.232127 | 0        | 0 |
| 28839 | TSNR42    | 0.472474 | 1.617593 | 4.067273 | 0.397709 | 0.690844 | NA | 0        | 0        | 0.695731 | 0        | 2.139111 | 0 |
| 28847 | TRANW-CC  | 0.472474 | 1.617593 | 4.067273 | 0.397709 | 0.690844 | NA | 0        | 0        | 0.695731 | 0        | 2.139111 | 0 |
| 28867 | LOC11962  | 0.472474 | 1.617593 | 4.067273 | 0.397709 | 0.690844 | NA | 0        | 0        | 0.695731 | 0        | 2.139111 | 0 |
| 28876 | LOC10324  | 0.472474 | 1.617593 | 4.067273 | 0.397709 | 0.690844 | NA | 0        | 0        | 0.695731 | 0        | 2.139111 | 0 |
| 28886 | OXT       | 0.472474 | 1.617593 | 4.067273 | 0.397709 | 0.690844 | NA | 0        | 0        | 0.695731 | 0        | 2.139111 | 0 |
| 28895 | LOC11962  | 0.487976 | 1.617593 | 4.067273 | 0.397709 | 0.690844 | NA | 0        | 0        | 0.695731 | 2.232127 | 0        | 0 |
| 28939 | LOC10323  | 0.487976 | 1.617593 | 4.067273 | 0.397709 | 0.690844 | NA | 0        | 0        | 0.695731 | 2.232127 | 0        | 0 |
| 28962 | LOC10323  | 0.487976 | 1.617593 | 4.067273 | 0.397709 | 0.690844 | NA | 0        | 0        | 0.695731 | 2.232127 | 0        | 0 |
| 28986 | LOC11962  | 0.463256 | 1.617593 | 4.067273 | 0.397709 | 0.690844 | NA | 0        | 0.547412 | 0        | 2.232127 | 0        | 0 |
| 29018 | LOC11962  | 0.463256 | 1.617593 | 4.067273 | 0.397709 | 0.690844 | NA | 0        | 0.547412 | 0        | 2.232127 | 0        | 0 |
| 29060 | LOC10324  | 0.472474 | 1.617593 | 4.067273 | 0.397709 | 0.690844 | NA | 0        | 0        | 0.695731 | 0        | 2.139111 | 0 |
| 29073 | LOC11962  | 0.487976 | 1.617593 | 4.067273 | 0.397709 | 0.690844 | NA | 0        | 0        | 0.695731 | 2.232127 | 0        | 0 |
| 29086 | LOC10323  | 0.472474 | 1.617593 | 4.067273 | 0.397709 | 0.690844 | NA | 0        | 0        | 0.695731 | 0        | 2.139111 | 0 |
| 29090 | LOC10323  | 0.487976 | 1.617593 | 4.067273 | 0.397709 | 0.690844 | NA | 0        | 0        | 0.695731 | 2.232127 | 0        | 0 |
| 29110 | LOC11962  | 0.463256 | 1.617593 | 4.067273 | 0.397709 | 0.690844 | NA | 0        | 0.547412 | 0        | 2.232127 | 0        | 0 |
| 29124 | LOC11962  | 0.487976 | 1.617593 | 4.067273 | 0.397709 | 0.690844 | NA | 0        | 0        | 0.695731 | 2.232127 | 0        | 0 |
| 29135 | LOC10324  | 0.472474 | 1.617593 | 4.067273 | 0.397709 | 0.690844 | NA | 0        | 0        | 0.695731 | 0        | 2.139111 | 0 |
| 29156 | CABS1     | 0.447754 | 1.617593 | 4.067273 | 0.397709 | 0.690844 | NA | 0        | 0.547412 | 0        | 0        | 2.139111 | 0 |
| 29163 | LOC11962  | 0.447754 | 1.617593 | 4.067273 | 0.397709 | 0.690844 | NA | 0        | 0.547412 | 0        | 0        | 2.139111 | 0 |
| 29164 | LOC10322  | 0.472474 | 1.617593 | 4.067273 | 0.397709 | 0.690844 | NA | 0        | 0        | 0.695731 | 0        | 2.139111 | 0 |
| 29166 | LOC11962  | 0.487976 | 1.617593 | 4.067273 | 0.397709 | 0.690844 | NA | 0        | 0        | 0.695731 | 2.232127 | 0        | 0 |
| 29182 | LOC11962  | 0.447754 | 1.617593 | 4.067273 | 0.397709 | 0.690844 | NA | 0        | 0.547412 | 0        | 0        | 2.139111 | 0 |
| 29222 | LOC11962  | 0.447754 | 1.617593 | 4.067273 | 0.397709 | 0.690844 | NA | 0        | 0.547412 | 0        | 0        | 2.139111 | 0 |



|       |           |          |          |          |          |          |          |          |          |          |          |          |          |
|-------|-----------|----------|----------|----------|----------|----------|----------|----------|----------|----------|----------|----------|----------|
| 29280 | LOC119623 | 0.472474 | 1.617593 | 4.067273 | 0.397709 | 0.690844 | NA       | 0        | 0        | 0.695731 | 0        | 2.139111 | 0        |
| 29287 | LOC119623 | 0.463256 | 1.617593 | 4.067273 | 0.397709 | 0.690844 | NA       | 0        | 0.547412 | 0        | 2.232127 | 0        | 0        |
| 29430 | LOC119623 | 0.487976 | 1.617593 | 4.067273 | 0.397709 | 0.690844 | NA       | 0        | 0        | 0.695731 | 2.232127 | 0        | 0        |
| 29458 | LOC119623 | 0.463256 | 1.617593 | 4.067273 | 0.397709 | 0.690844 | NA       | 0        | 0.547412 | 0        | 2.232127 | 0        | 0        |
| 29485 | LOC119623 | 0.472474 | 1.617593 | 4.067273 | 0.397709 | 0.690844 | NA       | 0        | 0        | 0.695731 | 0        | 2.139111 | 0        |
| 29558 | LOC119623 | 0.447754 | 1.617593 | 4.067273 | 0.397709 | 0.690844 | NA       | 0        | 0.547412 | 0        | 0        | 2.139111 | 0        |
| 29565 | LOC119623 | 0.472474 | 1.617593 | 4.067273 | 0.397709 | 0.690844 | NA       | 0        | 0        | 0.695731 | 0        | 2.139111 | 0        |
| 13385 | ABCG4     | 12.3238  | 1.615611 | 0.758441 | 2.130174 | 0.033157 | 0.065856 | 7.047123 | 3.284471 | 7.653045 | 26.78552 | 17.11289 | 12.05975 |
| 13058 | LOC119623 | 16.85004 | 1.615605 | 0.735991 | 2.195141 | 0.028153 | 0.057318 | 7.589209 | 2.737059 | 14.61036 | 37.94616 | 17.11289 | 21.10457 |
| 8674  | LOC103223 | 28.1331  | 1.614993 | 0.503025 | 3.210564 | 0.001325 | 0.00406  | 13.55216 | 10.94824 | 16.69755 | 55.80317 | 40.6431  | 31.15436 |
| 15652 | LOC119623 | 7.533797 | 1.614583 | 0.936084 | 1.724827 | 0.084559 | 0.143623 | 5.96295  | 2.189647 | 2.782925 | 13.39276 | 12.83466 | 8.039836 |
| 15815 | LOC119623 | 6.802164 | 1.613872 | 0.950199 | 1.698457 | 0.089422 | 0.150317 | 4.336691 | 2.189647 | 3.478657 | 8.928508 | 12.83466 | 9.044815 |
| 355   | ARRB1     | 2272.707 | 1.61327  | 0.098825 | 16.32447 | 6.61E-60 | 4.95E-58 | 1122.119 | 1150.112 | 1089.515 | 3312.476 | 3287.813 | 3674.205 |
| 16063 | TRNAE-UU  | 7.622303 | 1.612905 | 0.974759 | 1.654672 | 0.097991 | 0.16218  | 4.878777 | 2.737059 | 3.478657 | 22.32127 | 4.278221 | 8.039836 |
| 15318 | LOC119623 | 7.55285  | 1.612882 | 0.907847 | 1.776601 | 0.075634 | 0.131266 | 3.794605 | 4.379295 | 2.782925 | 15.62489 | 10.69555 | 8.039836 |
| 15122 | LOC119623 | 8.304896 | 1.61255  | 0.891022 | 1.809776 | 0.070331 | 0.123643 | 3.252518 | 3.284471 | 5.565851 | 17.85702 | 12.83466 | 7.034856 |
| 261   | CTSL      | 224656.7 | 1.612448 | 0.088935 | 18.13063 | 1.83E-73 | 1.86E-71 | 117731.4 | 106698.2 | 107766   | 333569.1 | 321208.9 | 360966.5 |
| 12876 | TMEM262   | 13.8568  | 1.612394 | 0.725246 | 2.223237 | 0.0262   | 0.054095 | 3.794605 | 8.211177 | 8.348776 | 15.62489 | 32.08666 | 15.07469 |
| 23443 | LOC103240 | 0.944947 | 1.611538 | 3.26897  | 0.49298  | 0.622027 | 0.705245 | 0        | 0        | 1.391463 | 0        | 4.278221 | 0        |
| 23444 | LOC119623 | 0.944947 | 1.611538 | 3.26897  | 0.49298  | 0.622027 | 0.705245 | 0        | 0        | 1.391463 | 0        | 4.278221 | 0        |
| 23445 | LOC103234 | 0.944947 | 1.611538 | 3.26897  | 0.49298  | 0.622027 | 0.705245 | 0        | 0        | 1.391463 | 0        | 4.278221 | 0        |
| 23446 | LOC119623 | 0.944947 | 1.611538 | 3.26897  | 0.49298  | 0.622027 | 0.705245 | 0        | 0        | 1.391463 | 0        | 4.278221 | 0        |
| 23447 | LOC119623 | 0.944947 | 1.611538 | 3.26897  | 0.49298  | 0.622027 | 0.705245 | 0        | 0        | 1.391463 | 0        | 4.278221 | 0        |
| 23448 | LOC119623 | 0.944947 | 1.611538 | 3.26897  | 0.49298  | 0.622027 | 0.705245 | 0        | 0        | 1.391463 | 0        | 4.278221 | 0        |
| 7785  | ST3GAL6   | 36.64742 | 1.610774 | 0.464231 | 3.469768 | 0.000521 | 0.001779 | 21.68345 | 11.49565 | 20.87194 | 46.87467 | 72.72976 | 46.22906 |
| 1906  | LAT2      | 265.5019 | 1.609089 | 0.196541 | 8.187029 | 2.68E-16 | 3.73E-15 | 147.9896 | 124.8099 | 121.753  | 330.3548 | 412.8484 | 455.2557 |
| 2775  | LOC119623 | 125.4702 | 1.609078 | 0.238866 | 6.736312 | 1.62E-11 | 1.56E-10 | 64.50828 | 59.66789 | 61.92009 | 167.4095 | 205.3546 | 193.961  |
| 1179  | MANSC1    | 547.4511 | 1.608778 | 0.157234 | 10.23176 | 1.43E-24 | 3.22E-23 | 252.6122 | 318.5937 | 240.0273 | 756.691  | 853.5052 | 863.2774 |
| 11402 | ROBO1     | 16.74252 | 1.608432 | 0.63438  | 2.535439 | 0.011231 | 0.026185 | 7.047123 | 10.40082 | 6.957314 | 29.01765 | 29.94755 | 17.08465 |
| 4412  | SIGLEC15  | 73.18432 | 1.607995 | 0.317082 | 5.071234 | 3.95E-07 | 2.38E-06 | 28.73058 | 40.50847 | 39.65669 | 95.98146 | 117.6511 | 116.5776 |
| 22022 | LOC119623 | 1.156546 | 1.607705 | 2.225972 | 0.722248 | 0.470142 | 0.567546 | 0.542086 | 0.547412 | 0.695731 | 0        | 2.139111 | 3.014938 |
| 21689 | PANO1     | 1.87179  | 1.607472 | 2.064177 | 0.778747 | 0.436129 | 0.534579 | 2.710432 | 0        | 0        | 2.232127 | 4.278221 | 2.009959 |
| 4853  | LOC103238 | 60.2618  | 1.60734  | 0.336286 | 4.779681 | 1.76E-06 | 9.62E-06 | 28.73058 | 32.84471 | 27.13352 | 98.21359 | 96.25998 | 78.3884  |
| 16944 | LOC119623 | 6.159557 | 1.607204 | 1.071365 | 1.500146 | 0.133577 | 0.209581 | 1.084173 | 4.379295 | 3.478657 | 11.16063 | 12.83466 | 4.019918 |
| 7004  | LOC119623 | 47.53573 | 1.607127 | 0.4307   | 3.73143  | 0.00019  | 0.000723 | 16.80468 | 20.25424 | 34.09084 | 49.10679 | 85.56443 | 79.39338 |
| 17551 | ISM2      | 7.072446 | 1.606201 | 1.141186 | 1.407483 | 0.159284 | 0.241272 | 0        | 4.926706 | 5.565851 | 8.928508 | 14.97377 | 8.039836 |
| 16383 | GPR158    | 7.087226 | 1.605966 | 1.009109 | 1.591469 | 0.111504 | 0.18094  | 2.168345 | 3.284471 | 4.87012  | 8.928508 | 19.252   | 4.019918 |
| 592   | WNT2B     | 836.4265 | 1.6055   | 0.117301 | 13.68697 | 1.21E-42 | 5.45E-41 | 421.7432 | 425.8864 | 394.4797 | 1227.67  | 1234.267 | 1314.513 |
| 18068 | LHX3      | 4.758997 | 1.604542 | 1.206133 | 1.330318 | 0.183413 | 0.269872 | 1.084173 | 1.094824 | 4.87012  | 8.928508 | 8.556443 | 4.019918 |
| 17275 | LOC103233 | 5.426209 | 1.604189 | 1.10331  | 1.453978 | 0.145952 | 0.22461  | 1.626259 | 4.926706 | 1.391463 | 11.16063 | 6.417332 | 7.034856 |
| 19417 | PKIB      | 2.849518 | 1.604117 | 1.438368 | 1.115235 | 0.26475  | 0.362467 | 1.626259 | 1.094824 | 1.391463 | 6.696381 | 4.278221 | 2.009959 |
| 778   | TSPAN15   | 1243.804 | 1.603851 | 0.131167 | 12.22752 | 2.22E-34 | 7.57E-33 | 646.709  | 557.8126 | 646.3344 | 1845.969 | 1653.533 | 2112.467 |
| 15182 | SDCBP2    | 9.571474 | 1.603672 | 0.891118 | 1.799618 | 0.071921 | 0.12594  | 2.710432 | 4.379295 | 6.957314 | 26.78552 | 8.556443 | 8.039836 |
| 9949  | ATP6V1G2  | 21.35734 | 1.603367 | 0.557624 | 2.875352 | 0.004036 | 0.010784 | 9.757555 | 14.23271 | 7.653045 | 31.24978 | 32.08666 | 33.16432 |
| 14408 | LOC103226 | 9.974139 | 1.602534 | 0.825323 | 1.941706 | 0.052173 | 0.096263 | 3.794605 | 3.284471 | 7.653045 | 20.08914 | 14.97377 | 10.04979 |
| 15018 | LOC119623 | 9.486744 | 1.602218 | 0.875414 | 1.83024  | 0.067214 | 0.118983 | 4.336691 | 6.568942 | 2.782925 | 20.08914 | 17.11289 | 6.029877 |
| 15921 | ERAS      | 8.490399 | 1.600892 | 0.952467 | 1.680786 | 0.092805 | 0.154966 | 1.626259 | 2.737059 | 8.348776 | 8.928508 | 19.252   | 10.04979 |
| 17194 | LOC119623 | 5.622244 | 1.600337 | 1.089631 | 1.468696 | 0.141915 | 0.219435 | 1.084173 | 3.831883 | 3.478657 | 4.464254 | 12.83466 | 8.039836 |
| 482   | BIRC3     | 1949.687 | 1.600318 | 0.108127 | 14.80041 | 1.46E-49 | 8.02E-48 | 912.8734 | 1074.569 | 913.4953 | 2874.98  | 2960.529 | 2961.674 |
| 3954  | ZFHX2     | 131.5076 | 1.600064 | 0.295927 | 5.406962 | 6.41E-08 | 4.31E-07 | 42.28274 | 75.54283 | 77.22618 | 225.4448 | 211.772  | 156.7768 |
| 18430 | LOC119615 | 5.458878 | 1.599455 | 1.269581 | 1.259829 | 0.207731 | 0.299649 | 2.710432 | 0.547412 | 3.478657 | 13.39276 | 2.139111 | 5.024897 |
| 19139 | LOC103233 | 4.974207 | 1.598826 | 1.374715 | 1.163024 | 0.24482  | 0.340067 | 0.542086 | 5.474118 | 1.391463 | 13.39276 | 0        | 9.044815 |
| 1476  | LOC119623 | 318.9329 | 1.598765 | 0.171643 | 9.314497 | 1.23E-20 | 2.21E-19 | 171.2993 | 146.159  | 155.8438 | 522.3177 | 489.8563 | 428.1213 |
| 21129 | LOC119623 | 1.840619 | 1.597688 | 1.856078 | 0.860787 | 0.389355 | 0.489896 | 1.084173 | 1.094824 | 0.695731 | 0        | 2.139111 | 6.029877 |
| 12458 | LOC103216 | 18.40986 | 1.597091 | 0.691661 | 2.309065 | 0.02094  | 0.044685 | 5.420864 | 10.40082 | 11.1317  | 44.64254 | 27.80844 | 11.05477 |
| 6934  | LOC103233 | 44.92031 | 1.596573 | 0.424272 | 3.763087 | 0.000168 | 0.000643 | 13.55216 | 26.27577 | 27.13352 | 80.35657 | 59.8951  | 62.30873 |
| 17264 | ZBED2     | 7.424169 | 1.596566 | 1.096058 | 1.456644 | 0.145215 | 0.223617 | 5.420864 | 0.547412 | 4.87012  | 17.85702 | 12.83466 | 3.014938 |
| 326   | SARAF     | 4780.253 | 1.59635  | 0.094882 | 16.82454 | 1.61E-63 | 1.32E-61 | 2475.708 | 2161.182 | 2492.11  | 7194.145 | 7144.63  | 7213.743 |
| 17286 | LOC103226 | 6.148362 | 1.594756 | 1.098281 | 1.452047 | 0.146489 | 0.225292 | 3.252518 | 4.926706 | 0.695731 | 11.16063 | 12.83466 | 4.019918 |
| 20846 | MEIOC     | 2.907906 | 1.59474  | 1.774122 | 0.89889  | 0.368711 | 0.470219 | 0        | 2.189647 | 2.087194 | 11.16063 | 0        | 2.009959 |
| 13860 | DOK7      | 21.79777 | 1.594573 | 0.782619 | 2.037483 | 0.041602 | 0.079797 | 5.420864 | 2.737059 | 24.3506  | 49.10679 | 32.08666 | 17.08465 |
| 356   | TTC39A    | 2841.128 | 1.594498 | 0.097933 | 16.28155 | 1.33E-59 | 9.97E-58 | 1467.97  | 1417.797 | 1357.372 | 4120.506 | 4096.397 | 4586.726 |
| 19101 | LOC103233 | 3.309683 | 1.593645 | 1.36248  | 1.169665 | 0.242136 | 0.336989 | 1.626259 | 0.547412 | 2.782925 | 4.464254 | 6.417332 | 4.019918 |
| 9278  | CALCRL    | 23.82169 | 1.593253 | 0.524411 | 3.038176 | 0.00238  | 0.00682  | 11.9259  | 9.306001 | 14.61036 | 37.94616 | 29.94755 | 39.1942  |
| 886   | CD40      | 1092.273 | 1.593093 | 0.137693 | 11.56993 | 5.85E-31 | 1.76E-29 | 618.5205 | 472.9638 | 541.9747 | 1622.756 | 1499.517 | 1797.908 |
| 19360 | SOD3      | 2.838097 | 1.591655 | 1.414022 | 1.125623 | 0.260325 | 0.357476 | 1.084173 | 1.094824 | 2.087194 | 4.464254 | 4.278221 | 4.019918 |
| 4665  | LOC119623 | 64.85028 | 1.590766 | 0.324096 | 4.908322 | 9.19E-07 | 5.23E-06 | 34.69353 | 27.37059 | 34.78657 | 95.98146 | 104.8164 | 91.45313 |
| 1091  | PLCD4     | 603.5635 | 1.590758 | 0.150855 | 10.54494 | 5.36E-26 | 1.31E-24 | 306.2788 | 319.6885 | 278.9883 | 866.0653 | 802.1665 | 1048.194 |
| 20865 | LOC119623 | 2.400345 | 1.589325 | 1.773645 | 0.896078 | 0.370211 | 0.471702 | 0.542086 | 2.189647 | 0.695731 | 6.696381 | 4.278221 | 0        |
| 21600 | FNDC11    | 1.858062 | 1.589136 | 2.010387 | 0.790463 | 0.429258 | 0.528325 | 1.626259 | 1.094824 | 0        | 0        | 6.417332 | 2.009959 |
| 1709  | ITGA7     | 254.4547 | 1.589001 | 0.182623 | 8.700999 | 3.29E-18 | 5.12E-17 | 120.3432 | 117.1461 | 143.3207 | 388.3901 | 395.7355 | 361.7926 |
| 15438 | BCL11A    | 8.092929 | 1.588898 | 0.905797 | 1.754143 | 0.079406 | 0.136741 | 2.168345 | 4.926706 | 4.87012  | 17.85702 | 10.69555 |          |



|       |           |          |          |          |          |          |          |          |          |          |          |          |          |
|-------|-----------|----------|----------|----------|----------|----------|----------|----------|----------|----------|----------|----------|----------|
| 5036  | RNASE10   | 62.97712 | 1.58639  | 0.339707 | 4.669877 | 3.01E-06 | 1.59E-05 | 27.10432 | 37.224   | 30.61218 | 78.12444 | 96.25998 | 108.5378 |
| 20986 | CCL1      | 2.154912 | 1.586277 | 1.800175 | 0.881179 | 0.378221 | 0.479147 | 0        | 1.094824 | 2.087194 | 4.464254 | 4.278221 | 1.004979 |
| 14479 | TCEA3     | 9.217583 | 1.585869 | 0.822005 | 1.92927  | 0.053697 | 0.098594 | 3.252518 | 4.926706 | 5.565851 | 13.39276 | 17.11289 | 11.05477 |
| 4938  | COL9A1    | 58.26982 | 1.585684 | 0.335922 | 4.720388 | 2.35E-06 | 1.27E-05 | 30.35684 | 25.72836 | 31.30791 | 84.82083 | 91.98176 | 85.42325 |
| 3435  | LOC103230 | 141.454  | 1.583685 | 0.267754 | 5.914704 | 3.32E-09 | 2.57E-08 | 74.26583 | 54.19377 | 85.57496 | 176.338  | 201.0764 | 257.2747 |
| 14552 | LOC119620 | 10.38093 | 1.582581 | 0.825909 | 1.916168 | 0.055344 | 0.101107 | 2.710432 | 8.758589 | 4.174388 | 17.85702 | 10.69555 | 18.08963 |
| 711   | ICOSLG    | 838.7154 | 1.582186 | 0.124292 | 12.72957 | 4.05E-37 | 1.51E-35 | 421.7432 | 394.6839 | 445.9638 | 1249.991 | 1172.233 | 1347.677 |
| 441   | PLA2G4A   | 1911.015 | 1.58107  | 0.104039 | 15.19691 | 3.71E-52 | 2.23E-50 | 1013.702 | 914.1777 | 946.8904 | 2727.659 | 2806.513 | 3057.148 |
| 13013 | KIAA1549L | 17.58365 | 1.579631 | 0.717478 | 2.201643 | 0.027691 | 0.056574 | 4.878777 | 14.78012 | 6.261582 | 29.01765 | 38.50399 | 12.05975 |
| 18040 | LOC103240 | 5.418087 | 1.579624 | 1.18176  | 1.336671 | 0.18133  | 0.267228 | 1.626259 | 1.642235 | 4.87012  | 2.232127 | 17.11289 | 5.024897 |
| 6843  | CEACAM1   | 43.73423 | 1.579366 | 0.415558 | 3.800587 | 0.000144 | 0.000561 | 14.09425 | 27.37059 | 24.3506  | 66.96381 | 66.31243 | 63.31371 |
| 15072 | LOC103210 | 10.27361 | 1.579332 | 0.867157 | 1.821275 | 0.068565 | 0.12094  | 3.252518 | 4.926706 | 6.957314 | 20.08914 | 21.39111 | 5.024897 |
| 11644 | IGSF10    | 25.41589 | 1.579199 | 0.636073 | 2.482734 | 0.013038 | 0.029767 | 4.336691 | 14.23271 | 19.48048 | 35.71403 | 55.61688 | 23.11453 |
| 1747  | SLC1A3    | 263.9031 | 1.578526 | 0.18364  | 8.595746 | 8.27E-18 | 1.26E-16 | 116.5486 | 142.8745 | 139.1463 | 377.2295 | 376.4835 | 431.1362 |
| 12158 | LOC103240 | 15.65349 | 1.578199 | 0.664829 | 2.373841 | 0.017604 | 0.038494 | 8.673382 | 4.926706 | 9.740239 | 24.5534  | 29.94755 | 16.07967 |
| 11393 | TDRD6     | 26.60893 | 1.577849 | 0.621553 | 2.538561 | 0.011131 | 0.025972 | 12.46799 | 13.6853  | 13.2189  | 33.4819  | 72.72976 | 14.06971 |
| 11484 | LOC119620 | 17.99275 | 1.577447 | 0.625848 | 2.520496 | 0.011719 | 0.027129 | 5.420864 | 8.758589 | 13.2189  | 29.01765 | 21.39111 | 30.14938 |
| 13282 | LOC103220 | 16.31275 | 1.576084 | 0.732592 | 2.151379 | 0.031446 | 0.06294  | 10.84173 | 4.379295 | 9.044508 | 15.62489 | 44.92132 | 13.06473 |
| 3915  | LOC103210 | 88.69669 | 1.576048 | 0.290033 | 5.434023 | 5.51E-08 | 3.74E-07 | 46.07734 | 39.41365 | 48.7012  | 147.3204 | 106.9555 | 143.7121 |
| 5794  | LOC119610 | 56.28966 | 1.575549 | 0.368365 | 4.277136 | 1.89E-05 | 8.69E-05 | 35.7777  | 20.25424 | 28.52499 | 84.82083 | 91.98176 | 76.37844 |
| 9140  | LOC119620 | 25.2871  | 1.575529 | 0.513398 | 3.068826 | 0.002149 | 0.006251 | 13.55216 | 9.853413 | 14.61036 | 33.4819  | 47.06043 | 33.16432 |
| 9284  | LOC103220 | 24.40794 | 1.575179 | 0.518833 | 3.036005 | 0.002397 | 0.006865 | 14.09425 | 12.59047 | 9.740239 | 44.64254 | 34.22577 | 31.15436 |
| 17236 | LOC103240 | 5.487069 | 1.574018 | 1.076714 | 1.461872 | 0.143776 | 0.221762 | 2.168345 | 3.831883 | 2.087194 | 13.39276 | 6.417332 | 5.024897 |
| 368   | LAD1      | 2090.354 | 1.573473 | 0.097434 | 16.14905 | 1.15E-58 | 8.33E-57 | 1052.19  | 1069.095 | 1034.553 | 3185.245 | 2934.86  | 3266.183 |
| 12188 | LOC119620 | 19.5882  | 1.573473 | 0.664155 | 2.369134 | 0.01783  | 0.038891 | 8.131296 | 4.926706 | 16.69755 | 17.85702 | 42.78221 | 27.13445 |
| 7099  | LOC103240 | 79.52704 | 1.573222 | 0.425652 | 3.696029 | 0.000219 | 0.00082  | 18.43094 | 47.62483 | 53.57132 | 107.1421 | 168.9897 | 81.40334 |
| 11959 | LOC119620 | 17.43312 | 1.572493 | 0.651708 | 2.41288  | 0.015827 | 0.035184 | 5.96295  | 8.211177 | 11.82743 | 35.71403 | 27.80844 | 15.07469 |
| 17690 | TFDP3     | 6.278675 | 1.570569 | 1.132532 | 1.386776 | 0.16551  | 0.248733 | 4.878777 | 2.189647 | 2.087194 | 20.08914 | 6.417332 | 2.009959 |
| 19508 | LOC119620 | 3.051637 | 1.570536 | 1.427775 | 1.099989 | 0.271337 | 0.369781 | 2.168345 | 1.642235 | 0.695731 | 2.232127 | 8.556443 | 3.014938 |
| 17057 | LOC119620 | 9.79941  | 1.570206 | 1.056455 | 1.486297 | 0.1372   | 0.213842 | 1.084173 | 10.94824 | 2.782925 | 2.232127 | 25.66933 | 16.07967 |
| 16480 | LOC103230 | 6.401543 | 1.569569 | 0.995877 | 1.576067 | 0.11501  | 0.185488 | 3.794605 | 1.642235 | 4.174388 | 8.928508 | 12.83466 | 7.034856 |
| 932   | SERPINA1  | 32535.89 | 1.569387 | 0.138663 | 11.31802 | 1.07E-29 | 3.05E-28 | 14146.29 | 20654.94 | 14398.86 | 48330.01 | 46810.16 | 50875.08 |
| 19096 | LOC119610 | 3.610841 | 1.568803 | 1.340113 | 1.170649 | 0.24174  | 0.336545 | 2.168345 | 1.094824 | 2.087194 | 11.16063 | 2.139111 | 3.014938 |
| 531   | SYK       | 1319.815 | 1.568567 | 0.110045 | 14.25387 | 4.24E-46 | 2.12E-44 | 684.6551 | 652.5149 | 662.3363 | 1901.772 | 1876     | 2141.651 |
| 11937 | PLEKHG6   | 21.0385  | 1.568553 | 0.648991 | 2.416912 | 0.015653 | 0.034861 | 6.505036 | 7.663765 | 17.39328 | 37.94616 | 40.6431  | 16.07967 |
| 1125  | HSD3B7    | 454.226  | 1.568021 | 0.15049  | 10.41945 | 2.02E-25 | 4.78E-24 | 239.0601 | 210.2061 | 240.0273 | 669.6381 | 626.7594 | 739.6649 |
| 11295 | TCEAL2    | 20.62328 | 1.567877 | 0.612491 | 2.559837 | 0.010472 | 0.024648 | 5.96295  | 13.13788 | 11.82743 | 26.78552 | 44.92132 | 21.10457 |
| 13206 | LOC119620 | 19.44081 | 1.567641 | 0.723438 | 2.166933 | 0.03024  | 0.060876 | 6.505036 | 9.853413 | 12.52316 | 37.94616 | 42.78221 | 7.034856 |
| 555   | MGLL      | 8473.208 | 1.567479 | 0.111097 | 14.10912 | 3.34E-45 | 1.60E-43 | 4498.775 | 3974.21  | 4357.366 | 12254.38 | 11367.23 | 14387.29 |
| 1027  | COL18A1   | 22282.62 | 1.567144 | 0.144067 | 10.87792 | 1.47E-27 | 3.80E-26 | 12492.38 | 8780.485 | 12464.72 | 33595.74 | 28972.11 | 37390.26 |
| 21573 | MOGAT2    | 1.666936 | 1.566515 | 1.975826 | 0.79284  | 0.427871 | 0.527253 | 0        | 1.094824 | 1.391463 | 2.232127 | 4.278221 | 1.004979 |
| 20183 | SLAMF9    | 3.370012 | 1.565736 | 1.565829 | 0.999941 | 0.317339 | 0.417998 | 0.542086 | 1.642235 | 2.782925 | 6.696381 | 8.556443 | 0        |
| 7857  | LOC103220 | 34.79811 | 1.565584 | 0.453573 | 3.451665 | 0.000557 | 0.001885 | 21.14137 | 12.59047 | 18.78475 | 46.87467 | 64.17332 | 45.22408 |
| 15508 | LOC119620 | 7.84055  | 1.564768 | 0.898087 | 1.742334 | 0.08145  | 0.139628 | 4.878777 | 3.284471 | 3.478657 | 13.39276 | 14.97377 | 7.034856 |
| 781   | SYNM      | 5085.145 | 1.56427  | 0.128013 | 12.21963 | 2.44E-34 | 8.31E-33 | 2283.81  | 3061.674 | 2366.182 | 7314.68  | 7187.412 | 8297.11  |
| 4932  | ATP2A1    | 77.04617 | 1.563858 | 0.330975 | 4.724998 | 2.30E-06 | 1.24E-05 | 30.89892 | 38.31883 | 47.30973 | 102.6778 | 147.5986 | 95.47305 |
| 10504 | ENTPD2    | 20.5074  | 1.563505 | 0.569839 | 2.743765 | 0.006074 | 0.015373 | 10.29964 | 8.758589 | 12.52316 | 22.32127 | 29.94755 | 39.1942  |
| 4678  | TUBB4A    | 101.5177 | 1.563376 | 0.319192 | 4.897911 | 9.69E-07 | 5.50E-06 | 32.52518 | 68.97389 | 52.87558 | 154.0168 | 136.9031 | 163.8117 |
| 3471  | LOC103210 | 240.8711 | 1.563287 | 0.265533 | 5.887356 | 3.92E-09 | 3.01E-08 | 166.4205 | 80.46954 | 118.2743 | 299.105  | 434.2395 | 346.7179 |
| 10854 | LOC119620 | 20.25535 | 1.562956 | 0.587604 | 2.65988  | 0.007817 | 0.019146 | 6.505036 | 11.49565 | 12.52316 | 37.94616 | 29.94755 | 23.11453 |
| 22169 | CLEC5A    | 1.404286 | 1.562631 | 2.24403  | 0.69635  | 0.486209 | 0.583061 | 1.626259 | 0.547412 | 0        | 2.232127 | 0        | 4.019918 |
| 17260 | MYLK4     | 5.9474   | 1.562165 | 1.0724   | 1.456699 | 0.145199 | 0.223614 | 3.794605 | 2.189647 | 2.782925 | 8.928508 | 14.97377 | 3.014938 |
| 21234 | LOC119620 | 1.863032 | 1.561545 | 1.846572 | 0.845646 | 0.39775  | 0.497984 | 0.542086 | 1.642235 | 0.695731 | 0        | 4.278221 | 4.019918 |
| 14680 | LOC119620 | 14.22633 | 1.560922 | 0.824739 | 1.892625 | 0.058408 | 0.105775 | 10.29964 | 3.831883 | 6.957314 | 35.71403 | 23.53022 | 5.024897 |
| 674   | LOC119620 | 1028.624 | 1.560664 | 0.120283 | 1.279494 | 1.70E-38 | 6.70E-37 | 507.3928 | 548.5066 | 509.2754 | 1475.436 | 1441.761 | 1689.37  |
| 21036 | LOC119620 | 2.826842 | 1.560512 | 1.78284  | 0.875296 | 0.381413 | 0.482013 | 2.168345 | 0        | 2.087194 | 0        | 10.69555 | 2.009959 |
| 15642 | TXK       | 8.865245 | 1.560497 | 0.903971 | 1.72627  | 0.084299 | 0.143264 | 1.626259 | 5.474118 | 6.261582 | 20.08914 | 10.69555 | 9.044815 |
| 26619 | CYP4A22   | 0.68496  | 1.560453 | 3.618843 | 0.431202 | 0.666321 | NA       | 0        | 1.094824 | 0        | 0        | 0        | 3.014938 |
| 21269 | LOC103230 | 1.92929  | 1.559731 | 1.857289 | 0.839789 | 0.401027 | 0.501254 | 1.626259 | 0.547412 | 0.695731 | 6.696381 | 0        | 2.009959 |
| 15280 | LOC103210 | 7.845519 | 1.559647 | 0.874601 | 1.783267 | 0.074543 | 0.129687 | 3.794605 | 3.831883 | 4.174388 | 13.39276 | 12.83466 | 9.044815 |
| 7410  | HRH1      | 39.547   | 1.559506 | 0.433543 | 3.597122 | 0.000322 | 0.001154 | 21.14137 | 25.18094 | 13.2189  | 58.0353  | 68.45154 | 51.25395 |
| 2593  | INSYN1    | 211.8765 | 1.559059 | 0.222983 | 6.991817 | 2.71E-12 | 2.78E-11 | 102.9964 | 84.84883 | 134.9719 | 294.6408 | 342.2577 | 311.5436 |
| 955   | SLC7A8    | 1082.126 | 1.559023 | 0.139394 | 11.18432 | 4.87E-29 | 1.35E-27 | 488.9619 | 644.8511 | 512.0583 | 1654.006 | 1482.404 | 1710.475 |
| 2779  | TCAF2     | 160.0514 | 1.558008 | 0.231391 | 6.733232 | 1.66E-11 | 1.59E-10 | 97.57555 | 74.99542 | 70.26887 | 223.2127 | 263.1106 | 231.1453 |
| 21710 | LOC119620 | 1.650545 | 1.557341 | 2.005776 | 0.776428 | 0.437496 | 0.535736 | 0.542086 | 0.547412 | 1.391463 | 0        | 6.417332 | 1.004979 |
| 5422  | SPAG8     | 54.15688 | 1.557205 | 0.349926 | 4.450103 | 8.58E-06 | 4.21E-05 | 23.8518  | 28.46541 | 29.91645 | 87.05295 | 81.28621 | 74.36848 |
| 15891 | LOC119620 | 10.81942 | 1.557123 | 0.923628 | 1.685878 | 0.091819 | 0.15361  | 3.252518 | 4.926706 | 8.348776 | 2.232127 | 32.08666 | 14.06971 |
| 12466 | HUNK      | 15.04577 | 1.556668 | 0.674838 | 2.306727 | 0.02107  | 0.044934 | 5.96295  | 8.211177 | 8.348776 | 29.01765 | 25.66933 | 13.06473 |
| 21199 | LOC103240 | 1.930178 | 1.556434 | 1.830835 | 0.850123 | 0.395257 | 0.495679 | 1.084173 | 1.094824 | 0.695731 | 6.696381 | 0        | 2.009959 |
| 567   | PNRC1     | 5205.563 | 1.556033 | 0.111382 | 13.97025 | 2.37E-44 | 1.11E-42 | 2375.422 | 3040.325 | 2509.503 | 7964.229 | 7687.    |          |



|       |           |          |          |          |          |          |          |          |          |          |          |          |          |
|-------|-----------|----------|----------|----------|----------|----------|----------|----------|----------|----------|----------|----------|----------|
| 372   | KIF13B    | 4118.689 | 1.551022 | 0.096233 | 16.1173  | 1.93E-58 | 1.38E-56 | 2057.76  | 2208.807 | 2023.883 | 6008.886 | 5814.103 | 6598.695 |
| 2695  | GCNT3     | 151.6283 | 1.551015 | 0.226676 | 6.842417 | 7.79E-12 | 7.68E-11 | 75.89209 | 68.97389 | 87.66215 | 227.677  | 205.3546 | 244.21   |
| 672   | RGS14     | 1886.062 | 1.550764 | 0.119414 | 12.98646 | 1.46E-38 | 5.78E-37 | 1019.664 | 855.0573 | 1007.419 | 2890.604 | 2532.707 | 3010.918 |
| 953   | ARHGEF3   | 650.5325 | 1.550741 | 0.138606 | 11.18809 | 4.66E-29 | 1.30E-27 | 317.1205 | 367.3133 | 310.2962 | 915.1721 | 939.0696 | 1054.223 |
| 20217 | LOC119624 | 2.388036 | 1.55049  | 1.559719 | 0.994083 | 0.320183 | 0.421027 | 0.542086 | 1.642235 | 1.391463 | 4.464254 | 4.278221 | 2.009959 |
| 3962  | CLEC2B    | 81.99237 | 1.550411 | 0.286974 | 5.402624 | 6.57E-08 | 4.41E-07 | 44.45108 | 38.86624 | 41.74388 | 133.9276 | 113.3729 | 119.5926 |
| 22201 | CUNH12or  | 1.194462 | 1.550181 | 2.241399 | 0.691613 | 0.48918  | 0.585699 | 0        | 1.094824 | 0.695731 | 2.232127 | 2.139111 | 1.004979 |
| 22203 | LOC119615 | 1.194462 | 1.550181 | 2.241399 | 0.691613 | 0.48918  | 0.585699 | 0        | 1.094824 | 0.695731 | 2.232127 | 2.139111 | 1.004979 |
| 15180 | IQCF1     | 10.98214 | 1.549789 | 0.860877 | 1.800244 | 0.071822 | 0.125783 | 3.794605 | 4.379295 | 8.348776 | 13.39276 | 29.94755 | 6.029877 |
| 17131 | LOC119627 | 7.445859 | 1.549733 | 1.049788 | 1.476234 | 0.139881 | 0.217077 | 6.505036 | 0.547412 | 4.174388 | 17.85702 | 8.556443 | 7.034856 |
| 13219 | LOC119626 | 13.12251 | 1.548866 | 0.715537 | 2.164621 | 0.030417 | 0.061172 | 6.505036 | 3.831883 | 9.740239 | 22.32127 | 19.252   | 17.08465 |
| 3339  | ELL3      | 104.3438 | 1.548409 | 0.257931 | 6.003182 | 1.93E-09 | 1.54E-08 | 52.04029 | 57.47824 | 49.39693 | 167.4095 | 154.016  | 145.722  |
| 586   | ZBTB20    | 2708.038 | 1.547288 | 0.112541 | 13.74866 | 5.19E-43 | 2.35E-41 | 1291.792 | 1578.188 | 1271.797 | 3966.49  | 4038.641 | 4101.321 |
| 16125 | LHX4      | 8.450437 | 1.547218 | 0.942757 | 1.641163 | 0.100763 | 0.166127 | 2.168345 | 4.926706 | 5.565851 | 22.32127 | 10.69555 | 5.024897 |
| 12549 | LOC103215 | 15.0386  | 1.547066 | 0.674646 | 2.293151 | 0.021839 | 0.046266 | 6.505036 | 7.116354 | 9.044508 | 24.5534  | 29.94755 | 13.06473 |
| 2345  | PAK6      | 184.7042 | 1.546688 | 0.210523 | 7.346876 | 2.03E-13 | 2.30E-12 | 85.10756 | 94.70224 | 104.3597 | 256.6946 | 258.8324 | 308.5287 |
| 14388 | LOC103237 | 10.70419 | 1.546384 | 0.79446  | 1.946458 | 0.0516   | 0.095342 | 3.794605 | 3.831883 | 9.044508 | 15.62489 | 12.83466 | 19.09461 |
| 642   | LOC103220 | 1020.65  | 1.54594  | 0.11713  | 13.19844 | 8.96E-40 | 3.71E-38 | 512.2716 | 536.4636 | 516.2327 | 1466.507 | 1433.204 | 1659.221 |
| 19292 | LOC103234 | 3.10825  | 1.545173 | 1.35931  | 1.136733 | 0.25565  | 0.352294 | 1.626259 | 1.642235 | 1.391463 | 6.696381 | 4.278221 | 3.014938 |
| 22532 | LOC119623 | 1.177184 | 1.545059 | 2.430368 | 0.63573  | 0.524952 | 0.619338 | 1.084173 | 0        | 0.695731 | 0        | 4.278221 | 1.004979 |
| 22534 | LOC119622 | 1.177184 | 1.545059 | 2.430368 | 0.63573  | 0.524952 | 0.619338 | 1.084173 | 0        | 0.695731 | 0        | 4.278221 | 1.004979 |
| 1016  | ARHGEF10  | 1979.42  | 1.544866 | 0.141465 | 10.92046 | 9.20E-28 | 2.41E-26 | 1167.112 | 804.6954 | 1060.99  | 2997.747 | 2746.618 | 3099.357 |
| 14021 | LOC103215 | 10.98523 | 1.5446   | 0.768755 | 2.009222 | 0.044514 | 0.084402 | 3.252518 | 6.568942 | 6.957314 | 20.08914 | 14.97377 | 14.06971 |
| 10106 | LOC103230 | 27.12864 | 1.54256  | 0.543702 | 2.837141 | 0.004552 | 0.011974 | 11.38381 | 13.13788 | 16.69755 | 31.24978 | 64.17332 | 26.12947 |
| 16517 | LOC119627 | 9.741012 | 1.542498 | 0.981181 | 1.572082 | 0.115932 | 0.186598 | 3.794605 | 3.831883 | 6.957314 | 29.01765 | 12.83466 | 2.009959 |
| 15836 | LOC119627 | 10.33086 | 1.54236  | 0.91114  | 1.69278  | 0.090497 | 0.151924 | 4.336691 | 1.094824 | 10.43597 | 20.08914 | 14.97377 | 11.05477 |
| 9902  | USH2A     | 28.97728 | 1.541897 | 0.534519 | 2.884646 | 0.003919 | 0.010521 | 15.7205  | 15.32753 | 12.52316 | 53.57105 | 55.61688 | 21.10457 |
| 6287  | LOC119615 | 46.24973 | 1.541302 | 0.382051 | 4.034287 | 5.48E-05 | 0.000232 | 23.30971 | 19.70683 | 27.82925 | 75.89232 | 68.45154 | 62.30873 |
| 627   | LOC103230 | 6498.752 | 1.541167 | 0.115699 | 13.32053 | 1.76E-40 | 7.46E-39 | 3563.676 | 3027.735 | 3384.733 | 9345.916 | 8671.955 | 10998.5  |
| 6404  | LOC119625 | 47.05266 | 1.540094 | 0.38716  | 3.977926 | 6.95E-05 | 0.000289 | 26.02015 | 26.82318 | 18.78475 | 66.96381 | 83.42532 | 60.29877 |
| 20873 | LOC103237 | 2.357031 | 1.539975 | 1.720748 | 0.894945 | 0.370817 | 0.47227  | 0.542086 | 1.642235 | 1.391463 | 0        | 8.556443 | 2.009959 |
| 12691 | TMEM88B   | 14.60546 | 1.53938  | 0.680502 | 2.262123 | 0.02369  | 0.049625 | 7.047123 | 6.02153  | 9.044508 | 26.78552 | 25.66933 | 13.06473 |
| 18754 | LOC119615 | 3.832545 | 1.539093 | 1.257411 | 1.224017 | 0.220946 | 0.313205 | 2.168345 | 1.642235 | 2.087194 | 8.928508 | 2.139111 | 6.029877 |
| 754   | TMPPE     | 871.3352 | 1.538614 | 0.123518 | 12.45661 | 1.29E-35 | 4.54E-34 | 470.531  | 405.6322 | 464.0528 | 1310.259 | 1227.85  | 1349.687 |
| 15929 | LOC103237 | 10.34171 | 1.537641 | 0.915448 | 1.679659 | 0.093024 | 0.155253 | 5.96295  | 3.284471 | 6.261582 | 17.85702 | 25.66933 | 3.014938 |
| 14925 | C2CD6     | 9.710124 | 1.537534 | 0.831224 | 1.849722 | 0.064354 | 0.114629 | 4.336691 | 7.663765 | 2.782925 | 11.16063 | 19.252   | 13.06473 |
| 5165  | FAM222A   | 64.78352 | 1.536638 | 0.334341 | 4.59602  | 4.31E-06 | 2.22E-05 | 28.73058 | 35.03436 | 36.17803 | 75.89232 | 113.3729 | 99.49297 |
| 10775 | IGSF9     | 28.76319 | 1.5364   | 0.574651 | 2.673621 | 0.007504 | 0.018511 | 10.84173 | 12.04306 | 20.87194 | 42.41041 | 66.31243 | 20.09959 |
| 12267 | LOC119627 | 20.10307 | 1.53621  | 0.653304 | 2.351447 | 0.018701 | 0.040528 | 11.9259  | 6.02153  | 12.52316 | 29.01765 | 47.06043 | 14.06971 |
| 1253  | CYP7B1    | 629.4731 | 1.536191 | 0.153703 | 9.994543 | 1.61E-23 | 3.42E-22 | 274.2957 | 379.3564 | 314.4706 | 892.8508 | 988.2691 | 927.5961 |
| 22059 | DLK2      | 2.379444 | 1.535855 | 2.147764 | 0.715095 | 0.47455  | 0.571917 | 0        | 2.189647 | 1.391463 | 0        | 10.69555 | 0        |
| 16064 | LOC119627 | 8.007354 | 1.535706 | 0.928219 | 1.654466 | 0.098033 | 0.162239 | 2.710432 | 4.379295 | 5.565851 | 4.464254 | 12.83466 | 18.08963 |
| 9390  | WAS       | 31.30714 | 1.535351 | 0.510148 | 3.00962  | 0.002616 | 0.007406 | 8.673382 | 15.87494 | 23.65487 | 49.10679 | 51.33866 | 39.1942  |
| 17969 | LOC103217 | 4.978192 | 1.534932 | 1.138218 | 1.34854  | 0.177485 | 0.262588 | 1.626259 | 3.831883 | 2.087194 | 4.464254 | 12.83466 | 5.024897 |
| 15569 | LOC103216 | 12.95516 | 1.53387  | 0.884908 | 1.733367 | 0.08303  | 0.141779 | 4.336691 | 1.094824 | 14.61036 | 20.08914 | 23.53022 | 14.06971 |
| 14420 | FCGR2A    | 10.43531 | 1.533278 | 0.79045  | 1.939753 | 0.05241  | 0.096619 | 4.336691 | 8.211177 | 3.478657 | 13.39276 | 17.11289 | 16.07967 |
| 9249  | DACT3     | 25.73583 | 1.533154 | 0.503861 | 3.042808 | 0.002344 | 0.006737 | 10.84173 | 15.32753 | 13.2189  | 37.94616 | 44.92132 | 32.15934 |
| 20107 | CUNH12or  | 3.163975 | 1.533119 | 1.515848 | 1.011394 | 0.311828 | 0.412292 | 1.626259 | 1.094824 | 2.087194 | 11.16063 | 0        | 3.014938 |
| 21393 | LOC119627 | 1.900948 | 1.532602 | 1.874879 | 0.817441 | 0.413677 | 0.514074 | 0        | 2.189647 | 0.695731 | 2.232127 | 4.278221 | 2.009959 |
| 22109 | LOC119625 | 1.722661 | 1.532132 | 2.167497 | 0.706867 | 0.479649 | 0.576755 | 0        | 0.547412 | 2.087194 | 6.696381 | 0        | 1.004979 |
| 12839 | PODN      | 16.92875 | 1.531133 | 0.686292 | 2.231024 | 0.02568  | 0.053173 | 5.420864 | 9.306001 | 11.1317  | 17.85702 | 42.78221 | 15.07469 |
| 14419 | LOC119625 | 10.02406 | 1.531109 | 0.789286 | 1.939865 | 0.052396 | 0.096605 | 5.420864 | 4.926706 | 4.87012  | 15.62489 | 19.252   | 10.04979 |
| 11430 | LOC103238 | 21.2316  | 1.530539 | 0.604976 | 2.529917 | 0.011409 | 0.026536 | 13.55216 | 7.663765 | 11.82743 | 40.17829 | 14.97377 | 39.1942  |
| 13449 | LOC103215 | 14.04086 | 1.530426 | 0.72268  | 2.117708 | 0.0342   | 0.067604 | 6.505036 | 6.568942 | 8.348776 | 13.39276 | 36.36488 | 13.06473 |
| 1042  | DUSP10    | 696.8171 | 1.529305 | 0.141447 | 10.81185 | 3.02E-27 | 7.72E-26 | 342.0565 | 414.3907 | 317.9492 | 1058.028 | 1037.469 | 1011.009 |
| 19564 | WEE2      | 4.327371 | 1.528819 | 1.40337  | 1.089391 | 0.275981 | 0.375025 | 0.542086 | 0.547412 | 5.565851 | 4.464254 | 12.83466 | 2.009959 |
| 10851 | LOC119628 | 22.27311 | 1.528516 | 0.574555 | 2.660348 | 0.007806 | 0.019125 | 11.38381 | 9.306001 | 13.2189  | 35.71403 | 44.92132 | 19.09461 |
| 399   | NFKBIA    | 2417.062 | 1.527655 | 0.097286 | 15.70274 | 1.45E-55 | 9.65E-54 | 1185.543 | 1329.116 | 1221.009 | 3578.1   | 3495.307 | 3693.3   |
| 2268  | TET1      | 240.8554 | 1.527638 | 0.204399 | 7.473794 | 7.79E-14 | 9.13E-13 | 118.1748 | 149.4434 | 104.3597 | 321.4263 | 382.9008 | 368.8275 |
| 12807 | LOC103225 | 13.76662 | 1.527478 | 0.68264  | 2.237606 | 0.025247 | 0.052408 | 5.96295  | 7.116354 | 8.348776 | 13.39276 | 25.66933 | 22.10955 |
| 15006 | LOC103240 | 11.03542 | 1.527337 | 0.83357  | 1.832284 | 0.066909 | 0.118538 | 5.420864 | 7.663765 | 3.478657 | 20.08914 | 23.53022 | 6.029877 |
| 12218 | ZDHHC19   | 17.56029 | 1.526273 | 0.645923 | 2.362932 | 0.018131 | 0.039451 | 7.589209 | 9.306001 | 9.740239 | 35.71403 | 29.94755 | 13.06473 |
| 28319 | LOC119615 | 0.70471  | 1.525676 | 3.224742 | 0.473116 | 0.636131 | NA       | 1.084173 | 0        | 0        | 0        | 2.139111 | 1.004979 |
| 727   | MARVELD1  | 970.3123 | 1.525627 | 0.120918 | 12.61703 | 1.70E-36 | 6.22E-35 | 485.1673 | 551.2437 | 464.7486 | 1392.847 | 1437.482 | 1490.385 |
| 27046 | LOC103235 | 0.720213 | 1.525254 | 3.202247 | 0.476307 | 0.633855 | NA       | 1.084173 | 0        | 0        | 2.232127 | 0        | 1.004979 |
| 27841 | LOC103233 | 0.720213 | 1.525254 | 3.202247 | 0.476307 | 0.633855 | NA       | 1.084173 | 0        | 0        | 2.232127 | 0        | 1.004979 |
| 18259 | TRNAE-CU  | 4.571976 | 1.524953 | 1.180623 | 1.291651 | 0.196478 | 0.286071 | 2.710432 | 2.737059 | 1.391463 | 11.16063 | 6.417332 | 3.014938 |
| 12346 | NRIP2     | 17.16063 | 1.524838 | 0.653081 | 2.334837 | 0.019552 | 0.042102 | 8.673382 | 6.568942 | 11.1317  | 17.85702 | 40.6431  | 18.08963 |
| 571   | FBXO30    | 1792.949 | 1.524208 | 0.10982  | 13.87919 | 8.47E-44 | 3.94E-42 | 922.0889 | 973.8456 | 882.1874 | 2484.357 | 2579.767 | 2915.445 |
| 560   | NT5C2     | 6757.494 | 1.523103 | 0.108342 | 14.05835 | 6.85E-45 | 3.25E-43 | 3306.185 | 3995.011 | 3163.491 | 9792.341 |          |          |



|       |           |          |          |          |          |          |          |          |          |          |          |          |          |
|-------|-----------|----------|----------|----------|----------|----------|----------|----------|----------|----------|----------|----------|----------|
| 554   | PPP3CC    | 1083.751 | 1.520033 | 0.10773  | 14.10963 | 3.31E-45 | 1.59E-43 | 571.359  | 553.9808 | 556.5851 | 1533.471 | 1644.976 | 1642.136 |
| 9272  | NPBWR1    | 26.26683 | 1.519636 | 0.499991 | 3.039325 | 0.002371 | 0.006798 | 15.7205  | 11.49565 | 13.2189  | 37.94616 | 47.06043 | 32.15934 |
| 400   | CYP3A5    | 5481.837 | 1.519447 | 0.096893 | 15.68177 | 2.02E-55 | 1.34E-53 | 2620.446 | 3111.489 | 2773.185 | 8261.102 | 8087.977 | 8036.821 |
| 4163  | P2RX6     | 82.17246 | 1.518382 | 0.289261 | 5.249184 | 1.53E-07 | 9.76E-07 | 39.5723  | 47.07742 | 40.35242 | 124.9991 | 130.4858 | 110.5477 |
| 17902 | CCL21     | 5.263847 | 1.51834  | 1.115511 | 1.361117 | 0.173477 | 0.257618 | 2.168345 | 4.379295 | 1.391463 | 8.928508 | 10.69555 | 4.019918 |
| 606   | IRF1      | 1473.156 | 1.516952 | 0.111921 | 13.55375 | 7.53E-42 | 3.30E-40 | 787.1094 | 762.5447 | 742.3454 | 2049.093 | 2089.911 | 2407.931 |
| 21960 | BCL2A1    | 1.425811 | 1.51671  | 2.065606 | 0.734269 | 0.462785 | 0.560246 | 1.626259 | 0.547412 | 0        | 2.232127 | 2.139111 | 2.009959 |
| 18548 | BPIFB4    | 5.861438 | 1.516495 | 1.219876 | 1.243155 | 0.213811 | 0.306446 | 2.168345 | 0.547412 | 6.261582 | 15.62489 | 8.556443 | 2.009959 |
| 3849  | SFRP4     | 105.2477 | 1.515637 | 0.275691 | 5.497582 | 3.85E-08 | 2.66E-07 | 50.41403 | 62.40495 | 50.78839 | 124.9991 | 186.1026 | 156.7768 |
| 27342 | LOC119623 | 0.706486 | 1.514529 | 3.222226 | 0.470026 | 0.638337 | NA       | 0        | 1.094824 | 0        | 0        | 2.139111 | 1.004979 |
| 9506  | SDR9C7    | 37.67564 | 1.514224 | 0.507604 | 2.983084 | 0.002854 | 0.007981 | 23.30971 | 13.6853  | 20.87194 | 51.33892 | 87.70354 | 29.1444  |
| 29487 | LOC103221 | 0.721988 | 1.514149 | 3.199813 | 0.473199 | 0.636071 | NA       | 0        | 1.094824 | 0        | 2.232127 | 0        | 1.004979 |
| 1602  | RGS20     | 294.4182 | 1.514123 | 0.168668 | 8.976919 | 2.78E-19 | 4.62E-18 | 143.6529 | 155.465  | 157.931  | 446.4254 | 462.0479 | 400.9868 |
| 12496 | TAS2R3    | 15.14659 | 1.514084 | 0.657605 | 2.30242  | 0.021311 | 0.045336 | 5.96295  | 7.116354 | 10.43597 | 29.01765 | 19.252   | 19.09461 |
| 28407 | LOC103230 | 0.705598 | 1.514047 | 2.925685 | 0.517502 | 0.604806 | NA       | 0.542086 | 0.547412 | 0        | 0        | 2.139111 | 1.004979 |
| 29213 | LOC119627 | 0.705598 | 1.514047 | 2.925685 | 0.517502 | 0.604806 | NA       | 0.542086 | 0.547412 | 0        | 0        | 2.139111 | 1.004979 |
| 16357 | LOC103221 | 8.010126 | 1.513158 | 0.948524 | 1.595277 | 0.11065  | 0.17984  | 3.252518 | 2.737059 | 6.261582 | 20.08914 | 10.69555 | 5.024897 |
| 4700  | LOC119627 | 73.02017 | 1.513061 | 0.309793 | 4.884112 | 1.04E-06 | 5.88E-06 | 35.23561 | 33.39212 | 45.22254 | 116.0706 | 102.6773 | 105.5228 |
| 658   | PPM1L     | 1375.797 | 1.512331 | 0.115692 | 13.07199 | 4.76E-39 | 1.92E-37 | 693.3285 | 790.4627 | 659.5533 | 1959.807 | 2015.042 | 2136.586 |
| 14467 | LOC119626 | 12.58154 | 1.510976 | 0.782629 | 1.93064  | 0.053528 | 0.098357 | 7.589209 | 4.379295 | 7.653045 | 6.696381 | 32.08666 | 17.08465 |
| 3935  | LOC119615 | 106.617  | 1.510916 | 0.278952 | 5.416402 | 6.08E-08 | 4.11E-07 | 55.8349  | 64.59459 | 46.614   | 138.3919 | 143.3204 | 190.9461 |
| 14768 | MAPK10    | 11.96519 | 1.510897 | 0.804361 | 1.87838  | 0.060329 | 0.108596 | 8.131296 | 6.568942 | 3.478657 | 15.62489 | 29.94755 | 8.039836 |
| 7923  | LOC119624 | 33.01498 | 1.51089  | 0.440237 | 3.431995 | 0.000599 | 0.00201  | 17.88885 | 15.87494 | 17.39328 | 49.10679 | 55.61688 | 42.20914 |
| 18103 | TMCO2     | 4.543272 | 1.510669 | 1.144569 | 1.319858 | 0.186882 | 0.274414 | 3.252518 | 1.642235 | 2.087194 | 6.696381 | 8.556443 | 5.024897 |
| 655   | SNCA      | 1623.978 | 1.509875 | 0.115374 | 13.08679 | 3.92E-39 | 1.59E-37 | 755.6684 | 940.4535 | 836.9648 | 2361.59  | 2382.969 | 2466.22  |
| 437   | UNC5D     | 5378.048 | 1.509862 | 0.099003 | 15.25073 | 1.63E-52 | 9.90E-51 | 2722.358 | 3053.463 | 2611.776 | 7790.123 | 7670.851 | 8419.718 |
| 4490  | ADORA2A   | 92.56384 | 1.509239 | 0.300872 | 5.016208 | 5.27E-07 | 3.12E-06 | 51.49821 | 37.224   | 54.96278 | 142.8561 | 158.2942 | 110.5477 |
| 20364 | LOC119623 | 2.412756 | 1.508866 | 1.560376 | 0.966989 | 0.333549 | 0.435445 | 0.542086 | 1.094824 | 2.087194 | 4.464254 | 4.278221 | 2.009959 |
| 21923 | LOC103241 | 2.876637 | 1.508736 | 2.036694 | 0.740777 | 0.458829 | 0.55635  | 0        | 1.642235 | 2.782925 | 0        | 12.83466 | 0        |
| 11076 | CMYA5     | 27.66061 | 1.508657 | 0.577823 | 2.610934 | 0.00903  | 0.021673 | 13.55216 | 16.96977 | 11.82743 | 71.42806 | 32.08666 | 20.09959 |
| 1770  | THEM6     | 1294.529 | 1.508405 | 0.176715 | 8.535801 | 1.39E-17 | 2.09E-16 | 729.6483 | 507.9982 | 785.4807 | 1928.558 | 1574.385 | 2241.104 |
| 572   | ENO2      | 1296.469 | 1.508002 | 0.108693 | 13.87395 | 9.11E-44 | 4.23E-42 | 685.1972 | 662.9157 | 678.3381 | 1861.594 | 1822.522 | 2068.248 |
| 16762 | LOC103215 | 8.976647 | 1.507836 | 0.984968 | 1.530848 | 0.125807 | 0.199511 | 1.626259 | 9.306001 | 2.782925 | 24.5534  | 8.556443 | 7.034856 |
| 18048 | LOC119620 | 6.885835 | 1.507505 | 1.129448 | 1.334728 | 0.181966 | 0.268038 | 0.542086 | 2.189647 | 8.348776 | 4.464254 | 10.69555 | 15.07469 |
| 298   | CAMK2D    | 5261.994 | 1.506523 | 0.086024 | 17.51289 | 1.14E-68 | 1.02E-66 | 2848.122 | 2769.904 | 2600.644 | 7651.731 | 7852.675 | 7848.89  |
| 14661 | LOC119627 | 10.57336 | 1.505196 | 0.793976 | 1.89577  | 0.057991 | 0.105155 | 3.794605 | 4.926706 | 7.653045 | 15.62489 | 21.39111 | 10.04979 |
| 8484  | LOC119624 | 36.91355 | 1.504388 | 0.461567 | 3.259303 | 0.001117 | 0.0035   | 17.88885 | 16.42235 | 22.95914 | 46.87467 | 79.14709 | 38.18922 |
| 564   | FAM102A   | 1730.497 | 1.504371 | 0.107367 | 14.01147 | 1.33E-44 | 6.25E-43 | 875.4695 | 953.044  | 879.4045 | 2600.428 | 2355.161 | 2719.474 |
| 588   | ADORA1    | 1367.315 | 1.504053 | 0.10946  | 13.74061 | 5.80E-43 | 2.62E-41 | 705.2544 | 764.7343 | 669.2936 | 2006.682 | 1944.452 | 2113.472 |
| 9214  | ECT2L     | 35.13866 | 1.503819 | 0.492822 | 3.051448 | 0.002277 | 0.006571 | 16.26259 | 16.42235 | 21.56767 | 53.7105  | 74.86887 | 28.13943 |
| 18738 | LDHAL6A   | 5.288506 | 1.503772 | 1.226406 | 1.226162 | 0.220138 | 0.312326 | 1.084173 | 2.189647 | 4.87012  | 4.464254 | 17.11289 | 2.009959 |
| 8427  | LRRRC23   | 41.64428 | 1.50346  | 0.45909  | 3.274871 | 0.001057 | 0.003335 | 21.68345 | 16.96977 | 25.74206 | 64.73168 | 85.56443 | 35.17428 |
| 4994  | LOC119628 | 83.83899 | 1.502517 | 0.320283 | 4.691216 | 2.72E-06 | 1.45E-05 | 54.20864 | 34.48694 | 41.74388 | 116.0706 | 154.016  | 102.5079 |
| 872   | EMX1      | 803.6536 | 1.502395 | 0.128624 | 11.68053 | 1.60E-31 | 4.89E-30 | 410.3594 | 466.3949 | 381.2608 | 1178.563 | 1157.259 | 1228.085 |
| 13036 | ZNF404    | 15.53496 | 1.501922 | 0.68335  | 2.197883 | 0.027957 | 0.057015 | 7.047123 | 9.306001 | 7.653045 | 15.62489 | 38.50399 | 15.07469 |
| 19444 | LOC119620 | 6.535805 | 1.500435 | 1.351115 | 1.110516 | 0.266777 | 0.364753 | 0        | 0.547412 | 9.740239 | 8.928508 | 14.97377 | 5.024897 |
| 1208  | LOC103218 | 1019.641 | 1.500175 | 0.148135 | 10.12711 | 4.19E-24 | 9.22E-23 | 472.6993 | 649.2304 | 475.8803 | 1419.633 | 1548.716 | 1551.688 |
| 13838 | VSIG2     | 12.20129 | 1.499718 | 0.734404 | 2.042089 | 0.041143 | 0.079042 | 5.96295  | 6.02153  | 6.957314 | 13.39276 | 27.80844 | 13.06473 |
| 19153 | LOC119627 | 4.302449 | 1.499222 | 1.292641 | 1.159813 | 0.246125 | 0.341629 | 1.626259 | 2.189647 | 2.782925 | 2.232127 | 14.97377 | 2.009959 |
| 7343  | LOC119623 | 45.81728 | 1.498922 | 0.41424  | 3.618489 | 0.000296 | 0.001073 | 16.26259 | 22.9913  | 32.69937 | 62.49956 | 79.14709 | 61.30375 |
| 18463 | LOC103220 | 4.07258  | 1.498875 | 1.194939 | 1.254352 | 0.209714 | 0.301969 | 2.168345 | 2.737059 | 1.391463 | 6.696381 | 6.417332 | 5.024897 |
| 1080  | SPNS2     | 6253.889 | 1.498448 | 0.141365 | 10.59983 | 2.99E-26 | 7.35E-25 | 3703.534 | 2605.68  | 3503.007 | 9069.132 | 8216.324 | 10425.66 |
| 13430 | ST6GAL2   | 14.52893 | 1.497844 | 0.706224 | 2.120921 | 0.033928 | 0.067163 | 5.420864 | 9.306001 | 7.653045 | 33.4819  | 19.252   | 12.05975 |
| 20271 | LOC119623 | 3.087349 | 1.497597 | 1.521449 | 0.984323 | 0.324957 | 0.426174 | 1.084173 | 1.642235 | 2.087194 | 0        | 10.69555 | 3.014938 |
| 15392 | LOC119624 | 110.7642 | 1.497047 | 0.850023 | 1.761184 | 0.078207 | 0.135079 | 59.08741 | 10.40082 | 104.3597 | 200.8914 | 173.268  | 116.5776 |
| 7782  | TENT5C    | 40.64427 | 1.4968   | 0.431347 | 3.470063 | 0.00052  | 0.001778 | 17.34676 | 28.46541 | 17.39328 | 73.66019 | 57.75599 | 49.24399 |
| 11875 | LOC103218 | 17.02449 | 1.496723 | 0.615365 | 2.432253 | 0.015005 | 0.033593 | 5.96295  | 10.40082 | 10.43597 | 24.5534  | 25.66933 | 25.12449 |
| 19660 | LOC103241 | 3.106046 | 1.496422 | 1.389711 | 1.076786 | 0.281576 | 0.380758 | 1.084173 | 1.094824 | 2.782925 | 2.232127 | 6.417332 | 5.024897 |
| 10687 | ZNF540    | 22.15906 | 1.496392 | 0.555218 | 2.695144 | 0.007036 | 0.017502 | 14.63633 | 9.306001 | 11.1317  | 22.32127 | 36.36488 | 39.1942  |
| 8718  | P2RY8     | 30.82705 | 1.496375 | 0.467904 | 3.198038 | 0.001384 | 0.004219 | 13.01007 | 19.15941 | 16.69755 | 40.17829 | 40.6431  | 55.27387 |
| 790   | IKBKE     | 1110.159 | 1.49563  | 0.12283  | 12.17642 | 4.15E-34 | 1.40E-32 | 568.1065 | 612.5538 | 566.3253 | 1502.221 | 1578.664 | 1833.083 |
| 8746  | LOC119623 | 32.06017 | 1.495616 | 0.468866 | 3.189856 | 0.001423 | 0.004327 | 14.63633 | 22.9913  | 12.52316 | 44.64254 | 51.33866 | 46.22906 |
| 11793 | LOC119623 | 19.24044 | 1.495594 | 0.610307 | 2.450558 | 0.014263 | 0.032154 | 10.29964 | 5.474118 | 14.61036 | 31.24978 | 25.66933 | 28.13943 |
| 770   | ZNF697    | 1073.389 | 1.495486 | 0.121316 | 12.32723 | 6.46E-35 | 2.23E-33 | 530.7026 | 628.9762 | 526.6686 | 1529.007 | 1597.916 | 1627.062 |
| 21078 | MYMK      | 2.381751 | 1.495257 | 1.721076 | 0.868792 | 0.384961 | 0.485539 | 0.542086 | 1.094824 | 2.087194 | 0        | 8.556443 | 2.009959 |
| 16878 | MDGA2     | 6.541949 | 1.4948   | 0.989884 | 1.510076 | 0.131024 | 0.20638  | 2.168345 | 3.831883 | 4.174388 | 15.62489 | 6.417332 | 7.034856 |
| 22245 | LOC103233 | 1.675265 | 1.494539 | 2.181755 | 0.685017 | 0.493333 | 0.589556 | 0.542086 | 0        | 2.087194 | 0        | 6.417332 | 1.004979 |
| 9229  | LOC103241 | 30.78309 | 1.494227 | 0.490336 | 3.047354 | 0.002309 | 0.00665  | 11.38381 | 15.87494 | 20.87194 | 44.64254 | 57.75599 | 34.1693  |
| 19247 | LOC119618 | 3.350591 | 1.493743 | 1.304531 | 1.145042 | 0.252192 | 0.348308 | 2.168345 | 1.642235 | 1.391463 | 4.464254 | 6.417332 | 4.019918 |
| 9989  | LOC103241 | 26.26864 | 1.493559 | 0.521562 | 2.86363  | 0.004188 | 0.011147 | 11.9259  | 14.78012 | 14.61036 | 53.571   |          |          |



|       |           |          |          |          |          |          |          |          |          |          |          |          |          |
|-------|-----------|----------|----------|----------|----------|----------|----------|----------|----------|----------|----------|----------|----------|
| 2392  | ARMH4     | 262.7195 | 1.492201 | 0.204907 | 7.282336 | 3.28E-13 | 3.65E-12 | 118.7169 | 173.5295 | 121.0573 | 368.301  | 395.7355 | 398.9768 |
| 15800 | LOC103232 | 9.171665 | 1.492114 | 0.876914 | 1.701551 | 0.08884  | 0.149481 | 6.505036 | 5.474118 | 2.087194 | 20.08914 | 12.83466 | 8.039836 |
| 5032  | BCL11B    | 72.23523 | 1.491978 | 0.319342 | 4.672033 | 2.98E-06 | 1.58E-05 | 35.23561 | 42.15071 | 35.4823  | 131.6955 | 98.39909 | 90.44815 |
| 19578 | LOC103229 | 3.371951 | 1.491813 | 1.371282 | 1.087896 | 0.276641 | 0.375651 | 0.542086 | 2.737059 | 2.087194 | 6.696381 | 2.139111 | 6.029877 |
| 17230 | LOC103230 | 6.639006 | 1.491536 | 1.019468 | 1.463053 | 0.143453 | 0.22134  | 2.710432 | 4.379295 | 3.478657 | 2.232127 | 14.97377 | 12.05975 |
| 5489  | LOC119627 | 82.44251 | 1.491526 | 0.337872 | 4.144471 | 1.01E-05 | 4.90E-05 | 31.9831  | 41.05589 | 57.7457  | 89.28508 | 136.9031 | 137.6822 |
| 19645 | ZNF287    | 3.418625 | 1.491501 | 1.383092 | 1.078382 | 0.280863 | 0.380084 | 2.168345 | 1.642235 | 1.391463 | 11.16063 | 2.139111 | 2.009959 |
| 13660 | LOC119628 | 12.74357 | 1.491087 | 0.718218 | 2.076093 | 0.037885 | 0.073732 | 4.336691 | 8.211177 | 7.653045 | 22.32127 | 12.83466 | 21.10457 |
| 1086  | STAB2     | 653.8596 | 1.490652 | 0.141266 | 10.5521  | 4.97E-26 | 1.22E-24 | 362.1137 | 339.3953 | 330.4724 | 839.2797 | 977.5736 | 1074.323 |
| 18900 | LOC119619 | 4.12511  | 1.490555 | 1.237364 | 1.204621 | 0.22835  | 0.3212   | 2.168345 | 2.737059 | 1.391463 | 11.16063 | 4.278221 | 3.014938 |
| 1008  | COQ10A    | 498.0686 | 1.490414 | 0.13603  | 10.95653 | 6.18E-28 | 1.63E-26 | 262.3698 | 267.6844 | 254.6377 | 758.9232 | 693.0719 | 751.7246 |
| 10878 | LOC119625 | 22.39314 | 1.489915 | 0.561336 | 2.654231 | 0.007949 | 0.019427 | 8.131296 | 14.23271 | 12.52316 | 35.71403 | 40.6431  | 23.11453 |
| 8764  | SVOPL     | 61.80905 | 1.489625 | 0.467939 | 3.183376 | 0.001456 | 0.004416 | 28.18849 | 19.15941 | 49.39693 | 102.6778 | 126.2075 | 45.22408 |
| 544   | JAG1      | 3007.129 | 1.489288 | 0.105173 | 14.1603  | 1.61E-45 | 7.88E-44 | 1555.788 | 1678.912 | 1506.954 | 4368.273 | 4087.84  | 4845.006 |
| 1220  | CSMD2     | 434.0118 | 1.488811 | 0.147367 | 10.10277 | 5.37E-24 | 1.17E-22 | 226.5921 | 212.9432 | 245.5932 | 600.4422 | 665.2634 | 653.2367 |
| 21445 | LOC103233 | 1.94117  | 1.488721 | 1.832575 | 0.812365 | 0.416582 | 0.516439 | 0        | 1.642235 | 1.391463 | 4.464254 | 2.139111 | 2.009959 |
| 16589 | LOC119618 | 7.514505 | 1.488672 | 0.954821 | 1.559112 | 0.11897  | 0.190657 | 3.252518 | 5.474118 | 2.782925 | 17.85702 | 10.69555 | 5.024897 |
| 14555 | POU2AF1   | 13.00632 | 1.488639 | 0.777033 | 1.915798 | 0.055391 | 0.101172 | 3.252518 | 6.02153  | 11.1317  | 15.62489 | 29.94755 | 12.05975 |
| 2006  | GPR68     | 257.8746 | 1.488464 | 0.186905 | 7.963739 | 1.67E-15 | 2.21E-14 | 139.8583 | 121.5254 | 146.7993 | 334.819  | 387.179  | 417.0665 |
| 14444 | LOC103240 | 11.76926 | 1.487709 | 0.768674 | 1.935422 | 0.052939 | 0.097436 | 8.673382 | 6.02153  | 3.478657 | 17.85702 | 23.53022 | 11.05477 |
| 4829  | LOC103241 | 109.8376 | 1.487554 | 0.310262 | 4.794517 | 1.63E-06 | 8.97E-06 | 54.75072 | 50.36189 | 66.79021 | 174.1059 | 207.4937 | 105.5228 |
| 15342 | LOC119626 | 9.206692 | 1.487365 | 0.839366 | 1.772011 | 0.076393 | 0.132374 | 4.878777 | 3.831883 | 5.565851 | 20.08914 | 12.83466 | 8.039836 |
| 21025 | LOC119627 | 2.401336 | 1.486774 | 1.695977 | 0.876648 | 0.380678 | 0.481347 | 0        | 1.094824 | 2.782925 | 2.232127 | 4.278221 | 4.019918 |
| 819   | KATZB     | 2189.154 | 1.486586 | 0.124505 | 11.93997 | 7.32E-33 | 2.38E-31 | 1069.536 | 1348.275 | 1037.335 | 3131.674 | 3140.214 | 3407.885 |
| 6131  | LOC119624 | 68.43534 | 1.485988 | 0.36207  | 4.104151 | 4.06E-05 | 0.000176 | 30.89892 | 38.31883 | 37.56949 | 124.9991 | 115.512  | 63.31371 |
| 21932 | LCN1      | 2.204352 | 1.485976 | 2.011067 | 0.738899 | 0.459968 | 0.557553 | 0        | 0        | 3.478657 | 4.464254 | 4.278221 | 1.004979 |
| 619   | ITGB8     | 2037.661 | 1.48587  | 0.11083  | 13.40674 | 5.52E-41 | 2.37E-39 | 1012.075 | 1175.841 | 1031.074 | 2841.498 | 2928.443 | 3237.039 |
| 18414 | VSTM2L    | 4.552495 | 1.485745 | 1.176922 | 1.262399 | 0.206805 | 0.298572 | 3.252518 | 1.094824 | 2.782925 | 4.464254 | 10.69555 | 5.024897 |
| 10124 | LOC103224 | 23.26755 | 1.485637 | 0.524587 | 2.832012 | 0.004626 | 0.012147 | 10.84173 | 12.59047 | 13.2189  | 29.01765 | 42.78221 | 31.15436 |
| 6945  | LOC103215 | 46.27866 | 1.485197 | 0.395121 | 3.75884  | 0.000171 | 0.000653 | 26.56223 | 29.56024 | 16.69755 | 69.19594 | 66.31243 | 69.34358 |
| 13383 | LOC103240 | 14.26296 | 1.4846   | 0.696838 | 2.130483 | 0.033132 | 0.065815 | 4.336691 | 7.116354 | 11.1317  | 26.78552 | 17.11289 | 19.09461 |
| 18891 | LOC119625 | 4.110495 | 1.483978 | 1.23132  | 1.205192 | 0.228129 | 0.321046 | 1.626259 | 3.284471 | 1.391463 | 8.928508 | 6.417332 | 3.014938 |
| 11634 | ADGRD1    | 26.46551 | 1.482744 | 0.596341 | 2.486403 | 0.012904 | 0.029487 | 11.9259  | 8.211177 | 21.56767 | 26.78552 | 64.17332 | 26.12947 |
| 3170  | LOC103211 | 131.4306 | 1.482725 | 0.239355 | 6.194674 | 5.84E-10 | 4.90E-09 | 74.80792 | 67.33165 | 65.39875 | 169.6417 | 222.4675 | 188.9361 |
| 640   | PLXDC2    | 5643.865 | 1.48261  | 0.112268 | 13.206   | 8.10E-40 | 3.37E-38 | 2747.836 | 3416.945 | 2760.662 | 7988.782 | 8139.316 | 8809.65  |
| 15837 | LOC119627 | 7.977865 | 1.482539 | 0.875892 | 1.692605 | 0.090531 | 0.151971 | 3.252518 | 4.379295 | 4.87012  | 15.62489 | 10.69555 | 9.044815 |
| 11810 | ZNF418    | 21.78346 | 1.482465 | 0.605884 | 2.44678  | 0.014414 | 0.032446 | 13.01007 | 7.663765 | 13.2189  | 37.94616 | 42.78221 | 16.07967 |
| 14093 | PPP1R16B  | 16.65817 | 1.482066 | 0.742437 | 1.996218 | 0.04591  | 0.086605 | 3.794605 | 10.40082 | 11.82743 | 20.08914 | 42.78221 | 11.05477 |
| 20751 | LOC103220 | 3.212883 | 1.481982 | 1.62768  | 0.910487 | 0.362566 | 0.464437 | 0        | 2.189647 | 2.782925 | 11.16063 | 2.139111 | 1.004979 |
| 8271  | WNT10B    | 32.38679 | 1.481512 | 0.44594  | 3.32222  | 0.000893 | 0.00287  | 17.34676 | 16.42235 | 17.39328 | 40.17829 | 75.75599 | 45.22408 |
| 20141 | LOC119627 | 3.357336 | 1.481406 | 1.473955 | 1.005055 | 0.31487  | 0.415611 | 0        | 3.284471 | 2.087194 | 4.464254 | 4.278221 | 6.029877 |
| 9511  | LOC119618 | 26.41849 | 1.4813   | 0.496845 | 2.981416 | 0.002869 | 0.00802  | 11.9259  | 16.42235 | 13.2189  | 35.71403 | 47.06043 | 34.1693  |
| 653   | ENDOD1    | 2321.263 | 1.480444 | 0.113028 | 13.09799 | 3.38E-39 | 1.38E-37 | 1143.802 | 1371.814 | 1160.48  | 3205.334 | 3416.16  | 3629.986 |
| 7263  | LOC119627 | 43.68925 | 1.480167 | 0.405812 | 3.647424 | 0.000265 | 0.00097  | 28.18849 | 19.70683 | 20.87194 | 55.80317 | 81.28621 | 56.27885 |
| 785   | ATP6VOD1  | 4065.714 | 1.480052 | 0.121383 | 12.19319 | 3.38E-34 | 1.14E-32 | 2329.887 | 1911.562 | 2199.903 | 5774.512 | 5377.724 | 6800.696 |
| 6140  | GPR146    | 64.60919 | 1.479479 | 0.360754 | 4.10107  | 4.11E-05 | 0.000178 | 27.6464  | 32.84471 | 41.74388 | 73.66019 | 128.3466 | 83.4133  |
| 11285 | SNTG1     | 28.60145 | 1.479377 | 0.577639 | 2.561076 | 0.010435 | 0.02458  | 10.84173 | 13.6853  | 20.17621 | 44.64254 | 64.17332 | 18.08963 |
| 16560 | CC2D2B    | 8.18034  | 1.479019 | 0.945859 | 1.563679 | 0.117893 | 0.189251 | 1.626259 | 7.663765 | 3.478657 | 11.16063 | 17.11289 | 8.039836 |
| 460   | P4HA2     | 3031.918 | 1.478883 | 0.098815 | 14.96618 | 1.22E-50 | 7.06E-49 | 1589.939 | 1617.054 | 1600.182 | 4363.808 | 4158.431 | 4862.091 |
| 19255 | KLRG2     | 5.37184  | 1.478451 | 1.292115 | 1.144211 | 0.252536 | 0.348672 | 2.168345 | 3.284471 | 2.782925 | 11.16063 | 12.83466 | 0        |
| 11204 | LOC103222 | 20.78091 | 1.477901 | 0.572404 | 2.58192  | 0.009825 | 0.023313 | 13.55216 | 9.853413 | 9.044508 | 40.17829 | 29.94755 | 22.10955 |
| 6751  | LOC119618 | 56.0135  | 1.477789 | 0.385245 | 3.835969 | 0.000125 | 0.000493 | 32.52518 | 18.612   | 38.26523 | 80.35657 | 74.86887 | 91.45313 |
| 5194  | PPM1N     | 70.89319 | 1.477681 | 0.322492 | 4.582065 | 4.60E-06 | 2.36E-05 | 39.5723  | 35.58177 | 36.17803 | 113.8385 | 119.7902 | 80.39836 |
| 19080 | LOC103225 | 4.364092 | 1.476709 | 1.259411 | 1.172539 | 0.240981 | 0.335775 | 1.084173 | 4.379295 | 1.391463 | 11.16063 | 2.139111 | 6.029877 |
| 14052 | WDR88     | 12.58803 | 1.475774 | 0.736141 | 2.004744 | 0.04499  | 0.085118 | 7.047123 | 4.926706 | 7.653045 | 22.32127 | 23.53022 | 10.04979 |
| 11243 | LOC119615 | 69.72176 | 1.475052 | 0.573438 | 2.572294 | 0.010103 | 0.023889 | 16.26259 | 13.13788 | 81.40057 | 120.5349 | 117.6511 | 69.34358 |
| 9200  | ANKRD30A  | 38.23844 | 1.474886 | 0.48286  | 3.054482 | 0.002254 | 0.006515 | 22.22554 | 10.40082 | 27.82925 | 64.73168 | 62.03421 | 42.20914 |
| 894   | DNM1      | 1170.065 | 1.474428 | 0.128218 | 11.49938 | 1.33E-30 | 3.95E-29 | 674.3554 | 530.9895 | 653.9875 | 1741.059 | 1632.141 | 1787.858 |
| 2280  | FGFR3     | 477.6149 | 1.47441  | 0.197931 | 7.449105 | 9.40E-14 | 1.10E-12 | 262.3698 | 187.7623 | 310.2962 | 725.4413 | 598.951  | 780.869  |
| 21390 | LOC119627 | 2.879832 | 1.474354 | 1.802557 | 0.817924 | 0.413401 | 0.513804 | 0        | 1.094824 | 3.478657 | 0        | 10.69555 | 2.009959 |
| 514   | APPL2     | 1745.477 | 1.473342 | 0.102325 | 14.39862 | 5.28E-47 | 2.73E-45 | 952.4458 | 941.0009 | 881.4916 | 2457.572 | 2519.872 | 2720.479 |
| 412   | CTSB      | 11637.04 | 1.473125 | 0.09481  | 15.53767 | 1.93E-54 | 1.24E-52 | 6212.852 | 6318.775 | 5962.418 | 16642.74 | 15906.43 | 18779.05 |
| 7820  | LOC119620 | 39.17019 | 1.472951 | 0.425617 | 3.460741 | 0.000539 | 0.001831 | 19.51511 | 24.08612 | 18.08902 | 75.89232 | 49.19955 | 48.23901 |
| 15505 | LOC119625 | 11.47852 | 1.472821 | 0.844892 | 1.743206 | 0.081298 | 0.139394 | 8.131296 | 2.189647 | 7.653045 | 29.01765 | 12.83466 | 9.044815 |
| 6967  | TEX26     | 48.19472 | 1.472814 | 0.392803 | 3.7495   | 0.000177 | 0.000676 | 22.76763 | 33.39212 | 20.17621 | 82.5887  | 59.8951  | 70.34856 |
| 14849 | LOC103235 | 10.52116 | 1.471973 | 0.790345 | 1.862444 | 0.062541 | 0.11197  | 5.96295  | 4.926706 | 6.261582 | 11.16063 | 10.69555 | 24.11951 |
| 11921 | LOC103215 | 22.98392 | 1.471682 | 0.608138 | 2.419979 | 0.015521 | 0.034614 | 7.589209 | 18.612   | 9.740239 | 37.94616 | 44.92132 | 19.09461 |
| 19357 | LOC103226 | 3.390814 | 1.470973 | 1.306287 | 1.126072 | 0.260135 | 0.357271 | 2.168345 | 1.094824 | 2.087194 | 6.696381 | 4.278221 | 4.019918 |
| 5650  | DISP2     | 75.52875 | 1.469734 | 0.338143 | 4.346488 | 1.38E-05 | 6.51E-05 | 32.52518 | 33.39212 | 54.96278 | 91.51721 | 126.2075 | 114.5677 |
| 19841 | LOC103238 | 3.355726 | 1.469446 | 1.403459 | 1.047017 | 0.295092 | 0.395012 | 2        |          |          |          |          |          |



|       |           |          |          |          |          |          |          |          |          |          |          |          |          |
|-------|-----------|----------|----------|----------|----------|----------|----------|----------|----------|----------|----------|----------|----------|
| 19518 | LOC119621 | 4.697779 | 1.468106 | 1.336739 | 1.098275 | 0.272085 | 0.370585 | 3.252518 | 0.547412 | 3.478657 | 15.62489 | 4.278221 | 1.004979 |
| 19149 | LOC119618 | 4.927483 | 1.466652 | 1.263264 | 1.161002 | 0.245641 | 0.341029 | 1.084173 | 1.094824 | 5.565851 | 13.39276 | 6.417332 | 2.009959 |
| 17424 | LOC103246 | 7.596535 | 1.466542 | 1.028839 | 1.425435 | 0.154032 | 0.235017 | 5.96295  | 1.642235 | 4.174388 | 20.08914 | 10.69555 | 3.014938 |
| 6585  | S100A5    | 49.05286 | 1.466538 | 0.375335 | 3.907282 | 9.33E-05 | 0.000377 | 21.14137 | 26.82318 | 29.91645 | 78.12444 | 77.00798 | 61.30375 |
| 18444 | LOC103246 | 6.274006 | 1.465875 | 1.165505 | 1.257717 | 0.208494 | 0.300505 | 3.794605 | 0.547412 | 5.565851 | 4.464254 | 19.252   | 4.019918 |
| 662   | PPARGC1B  | 1098.077 | 1.465675 | 0.112203 | 13.06273 | 5.38E-39 | 2.16E-37 | 559.9752 | 612.5538 | 580.9357 | 1546.864 | 1578.664 | 1709.47  |
| 15810 | LOC103225 | 8.216124 | 1.46554  | 0.862493 | 1.69919  | 0.089283 | 0.150133 | 4.336691 | 4.379295 | 4.174388 | 13.39276 | 14.97377 | 8.039836 |
| 21453 | LOC119628 | 2.490007 | 1.465015 | 1.807089 | 0.810704 | 0.417536 | 0.517419 | 0.542086 | 0.547412 | 2.782925 | 8.928508 | 2.139111 | 0        |
| 16036 | KCNK4     | 13.44501 | 1.464545 | 0.882897 | 1.658795 | 0.097157 | 0.16107  | 3.794605 | 1.642235 | 16.00182 | 26.78552 | 21.39111 | 11.05477 |
| 9969  | LOC103246 | 51.29098 | 1.46403  | 0.510016 | 2.870558 | 0.004097 | 0.010927 | 21.68345 | 15.87494 | 43.83108 | 73.66019 | 115.512  | 37.18424 |
| 13566 | MYCN      | 15.54799 | 1.463635 | 0.698316 | 2.095948 | 0.036087 | 0.070719 | 5.96295  | 9.306001 | 9.740239 | 8.928508 | 34.22577 | 25.12449 |
| 901   | S100A3    | 911.8413 | 1.46333  | 0.127711 | 11.45818 | 2.14E-30 | 6.31E-29 | 490.5882 | 429.7183 | 537.1046 | 1368.294 | 1285.606 | 1359.737 |
| 731   | SEMA3F    | 5074.392 | 1.463114 | 0.116177 | 12.59389 | 2.28E-36 | 8.30E-35 | 2817.223 | 2472.659 | 2818.408 | 7412.894 | 6528.566 | 8396.603 |
| 2035  | SUOX      | 343.8651 | 1.463054 | 0.185215 | 7.899239 | 2.81E-15 | 3.67E-14 | 178.8885 | 212.9432 | 158.6268 | 491.0679 | 442.7959 | 578.8682 |
| 16322 | LOC119621 | 8.518997 | 1.462113 | 0.913062 | 1.601329 | 0.109304 | 0.178033 | 2.710432 | 4.379295 | 6.261582 | 15.62489 | 17.11289 | 5.024897 |
| 2062  | GDPGP1    | 364.5037 | 1.461865 | 0.185843 | 7.866109 | 3.66E-15 | 4.72E-14 | 223.3396 | 152.1805 | 208.0237 | 491.0679 | 547.6123 | 564.7985 |
| 13792 | LOC119621 | 12.76701 | 1.46138  | 0.713656 | 2.047736 | 0.040586 | 0.078232 | 9.757555 | 4.379295 | 6.261582 | 17.85702 | 19.252   | 19.09461 |
| 20319 | LOC119628 | 2.686991 | 1.461046 | 1.498426 | 0.975054 | 0.329534 | 0.431156 | 0.542086 | 1.642235 | 2.087194 | 6.696381 | 2.139111 | 3.014938 |
| 517   | ADAMTS1   | 40887.62 | 1.460896 | 0.101524 | 14.38959 | 6.01E-47 | 3.09E-45 | 21346.82 | 23447.29 | 20581.13 | 57957.18 | 55509.92 | 66483.41 |
| 15564 | LOC103235 | 9.131485 | 1.460598 | 0.842289 | 1.734083 | 0.082903 | 0.141608 | 4.878777 | 3.831883 | 6.261582 | 11.16063 | 8.556443 | 20.09959 |
| 16279 | LOC119618 | 8.979694 | 1.460402 | 0.906079 | 1.611783 | 0.107009 | 0.174755 | 4.336691 | 1.642235 | 8.348776 | 13.39276 | 17.11289 | 9.044815 |
| 1636  | DRP2      | 323.759  | 1.460058 | 0.164348 | 8.883966 | 6.45E-19 | 1.05E-17 | 179.4306 | 183.9304 | 154.4524 | 477.6752 | 455.6306 | 491.435  |
| 26589 | TRNAN-GL  | 0.283452 | 1.459961 | 4.072558 | 0.358488 | 0.719979 | NA       | 0        | 0        | 0.695731 | 0        | 0        | 1.004979 |
| 26646 | LOC119628 | 0.257844 | 1.459961 | 4.072558 | 0.358488 | 0.719979 | NA       | 0.542086 | 0        | 0        | 0        | 0        | 1.004979 |
| 26684 | SPINK14   | 0.258732 | 1.459961 | 4.072558 | 0.358488 | 0.719979 | NA       | 0        | 0.547412 | 0        | 0        | 0        | 1.004979 |
| 26711 | LOC119618 | 0.283452 | 1.459961 | 4.072558 | 0.358488 | 0.719979 | NA       | 0        | 0        | 0.695731 | 0        | 0        | 1.004979 |
| 26712 | LOC119618 | 0.283452 | 1.459961 | 4.072558 | 0.358488 | 0.719979 | NA       | 0        | 0        | 0.695731 | 0        | 0        | 1.004979 |
| 26973 | UBL4B     | 0.283452 | 1.459961 | 4.072558 | 0.358488 | 0.719979 | NA       | 0        | 0        | 0.695731 | 0        | 0        | 1.004979 |
| 27000 | CUNH9orf  | 0.257844 | 1.459961 | 4.072558 | 0.358488 | 0.719979 | NA       | 0.542086 | 0        | 0        | 0        | 0        | 1.004979 |
| 27186 | LOC119625 | 0.258732 | 1.459961 | 4.072558 | 0.358488 | 0.719979 | NA       | 0        | 0.547412 | 0        | 0        | 0        | 1.004979 |
| 27193 | SMLR1     | 0.258732 | 1.459961 | 4.072558 | 0.358488 | 0.719979 | NA       | 0        | 0.547412 | 0        | 0        | 0        | 1.004979 |
| 27261 | LOC119625 | 0.258732 | 1.459961 | 4.072558 | 0.358488 | 0.719979 | NA       | 0        | 0.547412 | 0        | 0        | 0        | 1.004979 |
| 27286 | LOC119625 | 0.258732 | 1.459961 | 4.072558 | 0.358488 | 0.719979 | NA       | 0        | 0.547412 | 0        | 0        | 0        | 1.004979 |
| 27292 | LOC103211 | 0.258732 | 1.459961 | 4.072558 | 0.358488 | 0.719979 | NA       | 0        | 0.547412 | 0        | 0        | 0        | 1.004979 |
| 27346 | LOC119628 | 0.258732 | 1.459961 | 4.072558 | 0.358488 | 0.719979 | NA       | 0        | 0.547412 | 0        | 0        | 0        | 1.004979 |
| 27347 | STRIT1    | 0.258732 | 1.459961 | 4.072558 | 0.358488 | 0.719979 | NA       | 0        | 0.547412 | 0        | 0        | 0        | 1.004979 |
| 27441 | LOC119625 | 0.283452 | 1.459961 | 4.072558 | 0.358488 | 0.719979 | NA       | 0        | 0        | 0.695731 | 0        | 0        | 1.004979 |
| 27590 | LOC103247 | 0.283452 | 1.459961 | 4.072558 | 0.358488 | 0.719979 | NA       | 0        | 0        | 0.695731 | 0        | 0        | 1.004979 |
| 27643 | TRNAA-AG  | 0.283452 | 1.459961 | 4.072558 | 0.358488 | 0.719979 | NA       | 0        | 0        | 0.695731 | 0        | 0        | 1.004979 |
| 27765 | LOC119627 | 0.283452 | 1.459961 | 4.072558 | 0.358488 | 0.719979 | NA       | 0        | 0        | 0.695731 | 0        | 0        | 1.004979 |
| 27776 | LOC103215 | 0.258732 | 1.459961 | 4.072558 | 0.358488 | 0.719979 | NA       | 0        | 0.547412 | 0        | 0        | 0        | 1.004979 |
| 27793 | LOC119627 | 0.257844 | 1.459961 | 4.072558 | 0.358488 | 0.719979 | NA       | 0.542086 | 0        | 0        | 0        | 0        | 1.004979 |
| 27829 | LOC119627 | 0.258732 | 1.459961 | 4.072558 | 0.358488 | 0.719979 | NA       | 0        | 0.547412 | 0        | 0        | 0        | 1.004979 |
| 27881 | LOC119627 | 0.283452 | 1.459961 | 4.072558 | 0.358488 | 0.719979 | NA       | 0        | 0        | 0.695731 | 0        | 0        | 1.004979 |
| 27900 | FGFBP2    | 0.283452 | 1.459961 | 4.072558 | 0.358488 | 0.719979 | NA       | 0        | 0        | 0.695731 | 0        | 0        | 1.004979 |
| 28032 | LOC103227 | 0.283452 | 1.459961 | 4.072558 | 0.358488 | 0.719979 | NA       | 0        | 0        | 0.695731 | 0        | 0        | 1.004979 |
| 28064 | CUNH20orf | 0.258732 | 1.459961 | 4.072558 | 0.358488 | 0.719979 | NA       | 0        | 0.547412 | 0        | 0        | 0        | 1.004979 |
| 28102 | LOC119618 | 0.258732 | 1.459961 | 4.072558 | 0.358488 | 0.719979 | NA       | 0        | 0.547412 | 0        | 0        | 0        | 1.004979 |
| 28261 | LOC119615 | 0.258732 | 1.459961 | 4.072558 | 0.358488 | 0.719979 | NA       | 0        | 0.547412 | 0        | 0        | 0        | 1.004979 |
| 28311 | LOC119615 | 0.257844 | 1.459961 | 4.072558 | 0.358488 | 0.719979 | NA       | 0.542086 | 0        | 0        | 0        | 0        | 1.004979 |
| 28344 | LOC119615 | 0.258732 | 1.459961 | 4.072558 | 0.358488 | 0.719979 | NA       | 0        | 0.547412 | 0        | 0        | 0        | 1.004979 |
| 28358 | LOC119615 | 0.283452 | 1.459961 | 4.072558 | 0.358488 | 0.719979 | NA       | 0        | 0        | 0.695731 | 0        | 0        | 1.004979 |
| 28401 | LOC119615 | 0.283452 | 1.459961 | 4.072558 | 0.358488 | 0.719979 | NA       | 0        | 0        | 0.695731 | 0        | 0        | 1.004979 |
| 28411 | LOC119615 | 0.257844 | 1.459961 | 4.072558 | 0.358488 | 0.719979 | NA       | 0.542086 | 0        | 0        | 0        | 0        | 1.004979 |
| 28504 | LOC119628 | 0.257844 | 1.459961 | 4.072558 | 0.358488 | 0.719979 | NA       | 0.542086 | 0        | 0        | 0        | 0        | 1.004979 |
| 28529 | LOC119628 | 0.258732 | 1.459961 | 4.072558 | 0.358488 | 0.719979 | NA       | 0        | 0.547412 | 0        | 0        | 0        | 1.004979 |
| 28541 | LOC119628 | 0.258732 | 1.459961 | 4.072558 | 0.358488 | 0.719979 | NA       | 0        | 0.547412 | 0        | 0        | 0        | 1.004979 |
| 28627 | TEX51     | 0.283452 | 1.459961 | 4.072558 | 0.358488 | 0.719979 | NA       | 0        | 0        | 0.695731 | 0        | 0        | 1.004979 |
| 28676 | LOC119628 | 0.283452 | 1.459961 | 4.072558 | 0.358488 | 0.719979 | NA       | 0        | 0        | 0.695731 | 0        | 0        | 1.004979 |
| 28758 | LOC119627 | 0.258732 | 1.459961 | 4.072558 | 0.358488 | 0.719979 | NA       | 0        | 0.547412 | 0        | 0        | 0        | 1.004979 |
| 28821 | LOC119627 | 0.257844 | 1.459961 | 4.072558 | 0.358488 | 0.719979 | NA       | 0.542086 | 0        | 0        | 0        | 0        | 1.004979 |
| 28859 | KRTAP8-1  | 0.258732 | 1.459961 | 4.072558 | 0.358488 | 0.719979 | NA       | 0        | 0.547412 | 0        | 0        | 0        | 1.004979 |
| 28864 | LOC119627 | 0.283452 | 1.459961 | 4.072558 | 0.358488 | 0.719979 | NA       | 0        | 0        | 0.695731 | 0        | 0        | 1.004979 |
| 28870 | LOC119627 | 0.258732 | 1.459961 | 4.072558 | 0.358488 | 0.719979 | NA       | 0        | 0.547412 | 0        | 0        | 0        | 1.004979 |
| 28914 | LOC103227 | 0.258732 | 1.459961 | 4.072558 | 0.358488 | 0.719979 | NA       | 0        | 0.547412 | 0        | 0        | 0        | 1.004979 |
| 28953 | LOC119627 | 0.283452 | 1.459961 | 4.072558 | 0.358488 | 0.719979 | NA       | 0        | 0        | 0.695731 | 0        | 0        | 1.004979 |
| 28984 | PFN3      | 0.283452 | 1.459961 | 4.072558 | 0.358488 | 0.719979 | NA       | 0        | 0        | 0.695731 | 0        | 0        | 1.004979 |
| 29070 | PPP1R27   | 0.257844 | 1.459961 | 4.072558 | 0.358488 | 0.719979 | NA       | 0.542086 | 0        | 0        | 0        | 0        | 1.004979 |
| 29151 | PF4V1     | 0.283452 | 1.459961 | 4.072558 | 0.358488 | 0.719979 | NA       | 0        | 0        | 0.695731 | 0        | 0        | 1.004979 |
| 29184 | LOC119627 | 0.283452 | 1.459961 | 4.072558 | 0.358488 | 0.719979 | NA       | 0        | 0        | 0.695731 | 0        | 0        | 1.004979 |
| 29214 | LOC119627 | 0.258732 | 1.459961 | 4.072558 | 0.358488 | 0.719979 | NA       | 0        | 0.547412 | 0        | 0        | 0        | 1.004979 |
| 29236 | LOC119627 | 0.258732 | 1.459961 | 4.072558 | 0.358488 | 0.719979 | NA       | 0        | 0.547412 | 0        | 0        | 0        | 1.004979 |
| 20828 | SLC6A18   | 2.421974 | 1.459698 | 1.620551 | 0.900742 | 0.367726 | 0.469367 | 0.542086 | 0.547412 | 2.782925 | 2.232127 | 6.417332 | 2.009959 |
| 3377  | TNFRSF6B  | 340.7651 | 1.459482 | 0.244733 | 5.963565 | 2.47E-09 | 1.94E-08 | 228.2184 | 114.4091 | 203.1536 | 562.496  | 410.7092 | 525.6043 |



|       |           |          |          |          |          |          |            |          |          |          |          |          |          |
|-------|-----------|----------|----------|----------|----------|----------|------------|----------|----------|----------|----------|----------|----------|
| 10339 | SLC25A48  | 22.42899 | 1.459123 | 0.524946 | 2.779568 | 0.005443 | 0.013996   | 13.01007 | 10.40082 | 12.52316 | 31.24978 | 34.22577 | 33.16432 |
| 1012  | SOX6      | 2195.634 | 1.458248 | 0.13323  | 10.94535 | 7.00E-28 | 1.84E-26   | 1045.685 | 1408.491 | 1061.686 | 3160.692 | 3080.319 | 3416.93  |
| 629   | ARRDC3    | 7508.707 | 1.458168 | 0.10967  | 13.29593 | 2.44E-40 | 1.03E-38   | 3686.187 | 4619.061 | 3714.51  | 11176.26 | 11151.18 | 10705.04 |
| 12736 | SHBG      | 16.64781 | 1.457761 | 0.647642 | 2.250874 | 0.024394 | 0.050919   | 5.96295  | 7.116354 | 13.91463 | 20.08914 | 25.66933 | 27.13445 |
| 3206  | DOCK8     | 147.1979 | 1.457709 | 0.236842 | 6.154774 | 7.52E-10 | 6.23E-09   | 63.96619 | 90.87036 | 81.40057 | 218.7484 | 201.0764 | 227.1254 |
| 10635 | KLHL35    | 26.98863 | 1.456617 | 0.537573 | 2.709619 | 0.006736 | 0.016839   | 13.01007 | 10.94824 | 18.78475 | 46.87467 | 49.19955 | 23.11453 |
| 8964  | LOC119627 | 30.87492 | 1.456055 | 0.46553  | 3.127733 | 0.001762 | 0.005224   | 15.17842 | 13.6853  | 20.87194 | 37.94616 | 51.33866 | 46.22906 |
| 21278 | LOC119627 | 2.141514 | 1.455825 | 1.735128 | 0.83903  | 0.401452 | 0.501579   | 1.626259 | 1.094824 | 0.695731 | 0        | 6.417332 | 3.014938 |
| 7681  | LMO1      | 55.0092  | 1.455174 | 0.416009 | 3.49794  | 0.000469 | 0.001623   | 24.93597 | 23.53871 | 38.96096 | 95.98146 | 98.39909 | 48.23901 |
| 470   | ACSL1     | 2323.785 | 1.45488  | 0.097748 | 14.88405 | 4.18E-50 | 2.37E-48   | 1253.304 | 1251.383 | 1225.183 | 3296.852 | 3257.866 | 3658.125 |
| 16803 | LOC103227 | 6.790313 | 1.454826 | 0.954284 | 1.524521 | 0.127379 | 0.201521   | 2.710432 | 3.831883 | 4.174388 | 11.16063 | 12.83466 | 6.029877 |
| 18488 | CCDC70    | 5.076184 | 1.45456  | 1.160534 | 1.253354 | 0.210077 | 0.301974   | 2.168345 | 1.094824 | 4.87012  | 4.464254 | 12.83466 | 5.024897 |
| 487   | CHST15    | 3706.613 | 1.454544 | 0.098466 | 14.77208 | 2.22E-49 | 1.21E-47   | 1933.08  | 2002.98  | 2013.447 | 5363.801 | 5014.075 | 5912.294 |
| 18937 | FETUB     | 4.597914 | 1.45395  | 1.213762 | 1.197887 | 0.230961 | 0.324238   | 4.878777 | 1.642235 | 0.695731 | 8.928508 | 6.417332 | 5.024897 |
| 4706  | LOC103237 | 78.72863 | 1.453486 | 0.297778 | 4.881101 | 1.05E-06 | 5.96E-06   | 49.32986 | 39.96106 | 36.87376 | 120.5349 | 109.0946 | 116.5776 |
| 1829  | MYOM3     | 265.1816 | 1.453394 | 0.173681 | 8.368171 | 5.85E-17 | 8.51E-16   | 152.8684 | 138.4952 | 134.2762 | 399.5507 | 367.927  | 397.9719 |
| 9964  | PCDH85    | 27.67364 | 1.453166 | 0.506013 | 2.871798 | 0.004081 | 0.01089    | 11.38381 | 18.612   | 13.91463 | 51.33892 | 40.6431  | 30.14938 |
| 13973 | MYL7      | 15.80111 | 1.452723 | 0.720296 | 2.016842 | 0.043712 | 0.083166   | 4.878777 | 7.663765 | 12.52316 | 22.32127 | 36.36488 | 11.05477 |
| 19736 | LOC119626 | 3.805951 | 1.452555 | 1.366675 | 1.062838 | 0.287855 | 0.38775    | 4.336691 | 0.547412 | 1.391463 | 2.232127 | 4.278221 | 10.04979 |
| 19950 | LOC103217 | 3.64435  | 1.451903 | 1.398961 | 1.037844 | 0.299343 | 0.398899   | 0.542086 | 0.547412 | 4.87012  | 4.464254 | 6.417332 | 5.024897 |
| 764   | DPYSL2    | 4818.991 | 1.451699 | 0.117029 | 12.40461 | 2.47E-35 | 8.58E-34   | 2342.355 | 2946.718 | 2453.845 | 7004.414 | 6498.618 | 7667.993 |
| 11289 | PARVG     | 24.95536 | 1.45153  | 0.566912 | 2.560418 | 0.010455 | 0.02462    | 7.047123 | 14.78012 | 18.08902 | 33.4819  | 49.19955 | 27.13445 |
| 897   | SMPD1     | 1180.553 | 1.450519 | 0.126266 | 11.48785 | 1.52E-30 | 4.50E-29   | 638.0357 | 619.1228 | 642.8558 | 1816.951 | 1475.986 | 1890.366 |
| 13138 | SV2C      | 14.49526 | 1.450081 | 0.66453  | 2.182115 | 0.029101 | 0.058881   | 8.131296 | 5.474118 | 9.740239 | 17.5702  | 25.66933 | 20.09959 |
| 2375  | RGS11     | 320.0558 | 1.449924 | 0.198459 | 7.305906 | 2.75E-13 | 3.08E-12   | 165.8784 | 148.3486 | 202.4578 | 495.5322 | 376.4835 | 531.6341 |
| 9059  | MGAM      | 52.89318 | 1.449493 | 0.46873  | 3.09238  | 0.001986 | 0.005827   | 30.89892 | 22.44388 | 30.61218 | 82.5887  | 117.6511 | 33.16432 |
| 1003  | LGALS3    | 20864.02 | 1.449246 | 0.132068 | 10.97345 | 5.13E-28 | 1.36E-26   | 12323.25 | 8701.111 | 12532.21 | 30316.75 | 30777.52 | 30533.29 |
| 10568 | LOC103215 | 26.1834  | 1.449198 | 0.531022 | 2.729075 | 0.006351 | 0.015977   | 16.80468 | 9.853413 | 16.00182 | 24.5534  | 40.6431  | 49.24399 |
| 3018  | LOC119627 | 160.4559 | 1.447757 | 0.226595 | 6.389178 | 1.67E-10 | 1.47E-09   | 78.06044 | 88.1333  | 91.14081 | 225.4448 | 275.9453 | 204.0108 |
| 14113 | LDLRAD2   | 13.083   | 1.447139 | 0.726721 | 1.991327 | 0.046445 | 0.087489   | 3.794605 | 8.758589 | 8.348776 | 17.85702 | 25.66933 | 14.06971 |
| 20181 | LOC119627 | 3.661793 | 1.446757 | 1.446655 | 1.000071 | 0.317276 | 0.417957   | 1.084173 | 0.547412 | 4.174388 | 4.464254 | 10.69555 | 1.004979 |
| 14130 | LOC119627 | 14.84941 | 1.446744 | 0.727645 | 1.988256 | 0.046783 | 0.088021   | 7.047123 | 6.02153  | 10.43597 | 22.32127 | 34.22577 | 9.044815 |
| 13379 | LOC103226 | 20.14217 | 1.446252 | 0.678703 | 2.130905 | 0.033097 | 0.065766   | 7.589209 | 19.15941 | 5.565851 | 42.41041 | 14.97377 | 31.15436 |
| 11845 | LOC119627 | 19.68237 | 1.446015 | 0.592945 | 2.438701 | 0.01474  | 0.033083   | 8.673382 | 7.663765 | 15.30609 | 31.24978 | 32.08666 | 23.11453 |
| 14839 | LOC103237 | 12.15906 | 1.445955 | 0.775729 | 1.863995 | 0.062322 | 0.111655   | 4.878777 | 6.02153  | 8.348776 | 17.85702 | 27.80844 | 8.039836 |
| 1538  | DENND3    | 393.8958 | 1.445683 | 0.158222 | 9.137053 | 6.42E-20 | 1.11E-18   | 200.572  | 198.7105 | 237.2444 | 575.8888 | 536.9168 | 614.0425 |
| 17129 | LOC119627 | 6.317839 | 1.444114 | 0.977962 | 1.476657 | 0.139768 | 0.216926   | 2.710432 | 3.831883 | 3.478657 | 11.16063 | 10.69555 | 6.029877 |
| 11894 | POU5F2    | 21.83911 | 1.443806 | 0.595009 | 2.426527 | 0.015244 | 0.034073   | 15.7205  | 9.853413 | 9.740239 | 15.62489 | 44.92132 | 35.17428 |
| 1665  | MYO16     | 303.3101 | 1.442888 | 0.163857 | 8.805796 | 1.30E-18 | 2.07E-17   | 170.2151 | 162.0339 | 157.2353 | 464.2824 | 412.8484 | 453.2457 |
| 2266  | MFSD4A    | 267.4124 | 1.441751 | 0.192883 | 7.474761 | 7.73E-14 | 9.07E-13   | 135.5216 | 134.1159 | 163.4969 | 424.1041 | 325.1448 | 422.0914 |
| 12360 | SLC22A20F | 21.58506 | 1.441564 | 0.618734 | 2.32986  | 0.019814 | 0.042617   | 11.9259  | 10.40082 | 11.82743 | 51.33892 | 29.94755 | 14.06971 |
| 15698 | LOC119618 | 9.752591 | 1.44156  | 0.839534 | 1.717096 | 0.085962 | 0.145579   | 4.336691 | 5.474118 | 5.565851 | 17.85702 | 19.252   | 6.029877 |
| 21675 | LOC119618 | 2.176767 | 1.441479 | 1.84681  | 0.780524 | 0.435083 | 0.53367    | 2.710432 | 0        | 0.695731 | 2.232127 | 6.417332 | 1.004979 |
| 19180 | LOC119618 | 5.15024  | 1.441325 | 1.245566 | 1.157164 | 0.247205 | 0.342721   | 2.168345 | 1.094824 | 4.87012  | 8.928508 | 12.83466 | 1.004979 |
| 19022 | SYTL5     | 7.847715 | 1.441092 | 1.220491 | 1.180748 | 0.237703 | 0.332212   | 3.794605 | 7.116354 | 1.391463 | 13.39276 | 21.39111 | 0        |
| 15716 | SLC52A1   | 10.74609 | 1.439849 | 0.839375 | 1.715382 | 0.086275 | 0.145942   | 4.878777 | 3.831883 | 8.348776 | 17.85702 | 23.53022 | 6.029877 |
| 19026 | MEIOSIN   | 4.640573 | 1.439847 | 1.220283 | 1.179929 | 0.238028 | 0.332597   | 0.542086 | 2.189647 | 4.87012  | 8.928508 | 4.278221 | 7.034856 |
| 11874 | CATSPERG  | 27.68278 | 1.43974  | 0.591899 | 2.432411 | 0.014999 | 0.033581   | 8.131296 | 11.49565 | 25.04633 | 31.24978 | 62.03421 | 28.13943 |
| 12130 | MACC1     | 19.83798 | 1.439515 | 0.60507  | 2.379088 | 0.017356 | 0.038038   | 9.215468 | 8.211177 | 14.61036 | 20.08914 | 42.78221 | 24.11951 |
| 2184  | RAB30     | 345.1198 | 1.439424 | 0.188353 | 7.64218  | 2.14E-14 | 2.60E-13   | 168.0468 | 229.913  | 159.3225 | 468.7467 | 541.195  | 503.4947 |
| 21087 | LOC119626 | 2.210435 | 1.439247 | 1.659735 | 0.867155 | 0.385857 | 0.486462   | 1.084173 | 1.642235 | 0.695731 | 6.696381 | 2.139111 | 1.004979 |
| 15114 | GABRB1    | 12.4313  | 1.439134 | 0.794758 | 1.810783 | 0.070174 | 0.123434   | 3.252518 | 4.926706 | 11.82743 | 17.85702 | 25.66933 | 11.05477 |
| 9499  | LOC103216 | 29.40756 | 1.438926 | 0.482216 | 2.983985 | 0.002845 | 0.007963   | 11.38381 | 18.06459 | 18.08902 | 51.33892 | 36.36488 | 41.20416 |
| 3573  | LOC103226 | 117.9072 | 1.438793 | 0.248932 | 5.77987  | 7.48E-09 | 5.56E-08   | 65.05036 | 70.61612 | 54.26705 | 171.8738 | 181.8244 | 163.8117 |
| 9839  | LOC119627 | 33.19194 | 1.438708 | 0.496528 | 2.897537 | 0.003761 | 0.010162   | 23.8518  | 20.25424 | 9.740239 | 37.94616 | 47.06043 | 60.29877 |
| 895   | CPEB4     | 3778.066 | 1.438588 | 0.125135 | 11.4963  | 1.38E-30 | 4.09E-29   | 1877.787 | 2425.582 | 1806.119 | 5354.873 | 5418.367 | 5785.667 |
| 19430 | FXDYD7    | 4.725162 | 1.438239 | 1.291966 | 1.113218 | 0.265615 | 0.363426   | 1.626259 | 1.642235 | 4.174388 | 15.62489 | 4.278221 | 1.004979 |
| 19715 | CUNH16or  | 3.398612 | 1.438036 | 1.347445 | 1.067232 | 0.285867 | 0.385482   | 1.084173 | 2.189647 | 2.087194 | 4.464254 | 8.556443 | 2.009959 |
| 16838 | HDC       | 7.212361 | 1.437514 | 0.946952 | 1.518043 | 0.129004 | 0.203691   | 4.336691 | 3.831883 | 3.478657 | 4.464254 | 17.11289 | 10.04979 |
| 3726  | EPS8L1    | 130.366  | 1.437466 | 0.255977 | 5.615605 | 1.96E-08 | 1.40E-07   | 61.25576 | 61.31012 | 88.35788 | 194.195  | 203.2155 | 173.8614 |
| 12624 | LOC119627 | 15.78086 | 1.436557 | 0.631038 | 2.276499 | 0.022816 | 0.048049   | 8.131296 | 8.758589 | 8.348776 | 24.5534  | 27.80844 | 17.08465 |
| 21156 | LOC103237 | 2.193157 | 1.434513 | 1.672582 | 0.857664 | 0.391078 | 0.491436   | 2.168345 | 0.547412 | 0.695731 | 4.464254 | 4.278221 | 1.004979 |
| 13848 | ZNF426    | 13.54303 | 1.433929 | 0.702634 | 2.040792 | 0.041272 | 0.079232   | 5.96295  | 10.94824 | 4.87012  | 17.85702 | 23.53022 | 18.08963 |
| 19439 | LOC103217 | 5.840384 | 1.433751 | 1.289776 | 1.111628 | 0.266298 | 0.364174   | 1.084173 | 8.211177 | 0        | 11.16063 | 8.556443 | 6.029877 |
| 7299  | IRAG1     | 46.06109 | 1.43346  | 0.394309 | 3.635368 | 0.000278 | 0.001011   | 20.0572  | 24.63353 | 29.91645 | 58.0353  | 83.42532 | 60.29877 |
| 1164  | CASZ1     | 1002.107 | 1.432861 | 0.139288 | 10.28707 | 8.06E-25 | 1.84E-23   | 497.6353 | 632.2606 | 496.0565 | 1493.293 | 1332.666 | 1560.733 |
| 6041  | CASR      | 55.42537 | 1.432811 | 0.345529 | 4.146721 | 3.37E-05 | 0.000148   | 31.44101 | 27.918   | 30.61218 | 69.19594 | 91.98176 | 81.40334 |
| 9076  | LOC119627 | 52.27562 | 1.432757 | 0.463688 | 3.089917 | 0.002002 | 0.005865   | 29.27266 | 14.23271 | 41.04815 | 64.73168 | 109.0946 | 55.27387 |
| 5064  | GGN       | 96.01756 | 1.432608 | 0.307868 | 4.653322 | 3.27E-06 | 1.71E-05   | 40.65648 | 54.19377 | 59.8329  | 158.481  | 160.4333 | 102.5079 |
| 710   | CD276     | 3943.876 | 1.432476 | 0.112527 | 12.73012 | 4.02E-37 | 1.51E-35</ |          |          |          |          |          |          |



|                 |          |          |          |          |          |          |          |          |          |          |          |          |
|-----------------|----------|----------|----------|----------|----------|----------|----------|----------|----------|----------|----------|----------|
| 959 FAM214A     | 1127.405 | 1.430292 | 0.128139 | 11.16204 | 6.25E-29 | 1.73E-27 | 658.0929 | 644.8511 | 528.0601 | 1533.471 | 1666.367 | 1733.59  |
| 13886 SSTR2     | 22.61272 | 1.430194 | 0.703486 | 2.033012 | 0.042051 | 0.080508 | 5.420864 | 12.04306 | 18.78475 | 40.17829 | 49.19955 | 10.04979 |
| 609 IQSEC1      | 3092.499 | 1.43013  | 0.105958 | 13.4972  | 1.62E-41 | 7.09E-40 | 1550.367 | 1837.114 | 1637.056 | 4314.701 | 4395.872 | 4819.882 |
| 14068 DNAI1     | 15.35344 | 1.429423 | 0.714652 | 2.000166 | 0.045482 | 0.08595  | 9.757555 | 10.40082 | 4.174388 | 26.78552 | 29.94755 | 11.05477 |
| 14573 LOC103232 | 14.07558 | 1.428717 | 0.747431 | 1.911505 | 0.05594  | 0.102049 | 7.589209 | 6.568942 | 8.348776 | 13.39276 | 38.50399 | 10.04979 |
| 1032 LOC103222  | 762.0586 | 1.428454 | 0.131506 | 10.86228 | 1.74E-27 | 4.49E-26 | 455.3526 | 389.2098 | 392.3925 | 1078.117 | 1200.041 | 1057.238 |
| 19375 LOC103222 | 3.863973 | 1.427715 | 1.27086  | 1.123424 | 0.261257 | 0.35846  | 2.710432 | 2.737059 | 0.695731 | 4.464254 | 8.556443 | 4.019918 |
| 8005 CDC42BPG   | 70.86082 | 1.427591 | 0.418593 | 3.410447 | 0.000649 | 0.002154 | 36.86187 | 31.20247 | 45.91827 | 122.767  | 141.1813 | 47.23404 |
| 5442 LOC119622  | 82.50799 | 1.426749 | 0.321183 | 4.442162 | 8.91E-06 | 4.35E-05 | 42.28274 | 33.93953 | 57.7457  | 120.5349 | 139.0422 | 101.5029 |
| 18263 LOC103232 | 5.502374 | 1.425444 | 1.104009 | 1.291152 | 0.196651 | 0.28626  | 4.336691 | 2.737059 | 2.087194 | 2.232127 | 8.556443 | 13.06473 |
| 14926 LOC119622 | 12.33076 | 1.42518  | 0.770604 | 1.849432 | 0.064395 | 0.114696 | 5.420864 | 10.94824 | 3.478657 | 13.39276 | 25.66933 | 15.07469 |
| 11396 LOC119622 | 22.00509 | 1.422239 | 0.560357 | 2.538094 | 0.011146 | 0.026001 | 9.215468 | 13.6853  | 12.52316 | 42.41041 | 32.08666 | 22.10955 |
| 14509 MMP23B    | 17.35678 | 1.421932 | 0.739719 | 1.922259 | 0.054573 | 0.099995 | 11.38381 | 2.189647 | 14.61036 | 26.78552 | 32.08666 | 17.08465 |
| 656 FNIP2       | 1271.821 | 1.421842 | 0.108659 | 13.08532 | 3.99E-39 | 1.62E-37 | 730.1903 | 702.8768 | 640.7686 | 1854.898 | 1811.827 | 1890.366 |
| 5994 DYNC111    | 62.75202 | 1.420902 | 0.341044 | 4.166332 | 3.10E-05 | 0.000137 | 39.03022 | 27.37059 | 35.4823  | 89.28508 | 106.9555 | 78.3884  |
| 18795 LOC103242 | 5.589034 | 1.419578 | 1.164689 | 1.218847 | 0.222902 | 0.315289 | 1.084173 | 4.379295 | 3.478657 | 4.464254 | 17.11289 | 3.014938 |
| 14175 LOC103212 | 12.18483 | 1.41917  | 0.716125 | 1.981735 | 0.047509 | 0.089104 | 5.420864 | 6.02153  | 8.348776 | 17.85702 | 21.39111 | 14.06971 |
| 3116 LOC119622  | 175.8271 | 1.419025 | 0.22662  | 6.26168  | 3.81E-10 | 3.25E-09 | 101.9122 | 77.73248 | 107.8384 | 225.4448 | 288.7799 | 253.2548 |
| 3436 CXXC4      | 139.6568 | 1.418444 | 0.239871 | 5.913349 | 3.35E-09 | 2.59E-08 | 62.88202 | 82.65918 | 82.0963  | 225.4448 | 198.9373 | 185.9212 |
| 9932 LOC119622  | 33.42006 | 1.4182   | 0.492724 | 2.878285 | 0.003998 | 0.010701 | 11.9259  | 26.82318 | 15.30609 | 55.80317 | 53.47777 | 37.18424 |
| 21612 LOC119622 | 2.24977  | 1.418042 | 1.796678 | 0.789258 | 0.429961 | 0.528897 | 1.626259 | 0.547412 | 1.391463 | 8.928508 | 0        | 1.004979 |
| 12886 P2RX5     | 20.6806  | 1.418016 | 0.638365 | 2.221325 | 0.026329 | 0.054319 | 13.55216 | 7.116354 | 12.52316 | 46.87467 | 29.94755 | 14.06971 |
| 14505 LOC119622 | 13.06066 | 1.417514 | 0.737053 | 1.92322  | 0.054452 | 0.099801 | 7.047123 | 6.568942 | 7.653045 | 8.928508 | 32.08666 | 16.07967 |
| 17112 LOC119622 | 8.996438 | 1.417406 | 0.957946 | 1.47963  | 0.138972 | 0.215905 | 10.29964 | 2.737059 | 1.391463 | 13.39276 | 17.11289 | 9.044815 |
| 18941 LOC103232 | 5.622511 | 1.417202 | 1.184373 | 1.196584 | 0.231469 | 0.324883 | 3.252518 | 2.189647 | 3.478657 | 6.696381 | 17.11289 | 1.004979 |
| 1278 LOC119622  | 432.3447 | 1.416142 | 0.142909 | 9.909364 | 3.79E-23 | 7.89E-22 | 241.7705 | 224.9863 | 240.0273 | 660.7096 | 607.5074 | 619.0674 |
| 18523 TRNAL-CA  | 6.417809 | 1.415888 | 1.135025 | 1.247451 | 0.212232 | 0.304605 | 1.084173 | 1.094824 | 8.348776 | 13.39276 | 8.556443 | 6.029877 |
| 787 ADGRE5      | 1308.992 | 1.415289 | 0.116102 | 12.19006 | 3.51E-34 | 1.19E-32 | 722.059  | 719.8465 | 703.3844 | 1841.505 | 1747.653 | 2119.502 |
| 14450 LOC103212 | 17.77041 | 1.415145 | 0.731594 | 1.934331 | 0.053072 | 0.097642 | 8.131296 | 9.853413 | 10.43597 | 37.94616 | 34.22577 | 6.029877 |
| 10557 LOC119622 | 33.11952 | 1.41501  | 0.517873 | 2.732349 | 0.006288 | 0.015836 | 17.88885 | 27.37059 | 8.348776 | 53.57105 | 51.33866 | 40.19918 |
| 20680 LOC119622 | 3.669958 | 1.414913 | 1.530283 | 0.924609 | 0.355169 | 0.456585 | 0        | 0.547412 | 5.565851 | 4.464254 | 6.417332 | 5.024897 |
| 836 SIRPA       | 7254.163 | 1.414636 | 0.119403 | 11.8476  | 2.21E-32 | 7.04E-31 | 3533.861 | 4599.354 | 3741.643 | 10401.71 | 9822.796 | 11425.61 |
| 1401 GJB4       | 769.7568 | 1.413946 | 0.148455 | 9.524485 | 1.66E-21 | 3.15E-20 | 472.6993 | 378.809  | 411.1772 | 1118.296 | 973.2954 | 1264.264 |
| 20359 LOC119612 | 2.927026 | 1.413559 | 1.460253 | 0.968023 | 0.333033 | 0.434878 | 5.42086  | 2.737059 | 1.391463 | 4.464254 | 6.417332 | 2.009959 |
| 11942 LOC119622 | 26.55499 | 1.412663 | 0.58467  | 2.416171 | 0.015685 | 0.034917 | 8.673382 | 14.78012 | 19.48048 | 49.10679 | 49.19955 | 18.08963 |
| 17233 ASIC2     | 7.115763 | 1.411425 | 0.965268 | 1.46221  | 0.143684 | 0.221658 | 1.626259 | 4.379295 | 5.565851 | 13.39276 | 10.69555 | 7.034856 |
| 20626 SH2D7     | 2.679818 | 1.410925 | 1.513514 | 0.932218 | 0.351224 | 0.452695 | 1.084173 | 0.547412 | 2.782925 | 2.232127 | 6.417332 | 3.014938 |
| 9567 LOC119622  | 28.24569 | 1.41074  | 0.475276 | 2.968254 | 0.002995 | 0.008323 | 13.01007 | 15.87494 | 17.39328 | 37.94616 | 47.06043 | 38.18922 |
| 2357 KCNV1      | 247.8148 | 1.409797 | 0.192383 | 7.328079 | 2.33E-13 | 2.63E-12 | 118.1748 | 143.4219 | 146.7993 | 348.2118 | 327.2839 | 402.9968 |
| 6507 LOC119622  | 64.10875 | 1.408364 | 0.357649 | 3.937841 | 8.22E-05 | 0.000336 | 30.89892 | 43.79295 | 29.91645 | 122.767  | 74.86887 | 82.40832 |
| 1523 DAB2       | 3679.811 | 1.4079   | 0.153551 | 9.168938 | 4.78E-20 | 8.34E-19 | 1716.245 | 2599.111 | 1728.197 | 5220.945 | 5123.17  | 5691.199 |
| 5117 LOC119622  | 76.25705 | 1.407552 | 0.304644 | 4.62032  | 3.83E-06 | 1.99E-05 | 39.03022 | 45.98259 | 41.04815 | 93.74933 | 109.0946 | 128.6374 |
| 16259 MUC1      | 8.571429 | 1.406244 | 0.870442 | 1.615551 | 0.106191 | 0.173633 | 3.794605 | 3.831883 | 6.261582 | 13.39276 | 17.11289 | 7.034856 |
| 13738 C1QTNF9   | 16.0434  | 1.406158 | 0.681863 | 2.06223  | 0.039186 | 0.075827 | 4.878777 | 13.6853  | 7.653045 | 17.85702 | 32.08666 | 20.09959 |
| 8170 LOC103232  | 50.72796 | 1.406023 | 0.418977 | 3.35585  | 0.000791 | 0.002575 | 22.22554 | 29.56024 | 30.61218 | 80.35657 | 98.39909 | 43.21412 |
| 1085 INTS6L     | 680.0435 | 1.406003 | 0.133159 | 10.55885 | 4.62E-26 | 1.13E-24 | 350.1878 | 403.9899 | 365.259  | 906.2436 | 1005.382 | 1049.199 |
| 864 THSD1       | 1087.135 | 1.405576 | 0.120051 | 11.70817 | 1.16E-31 | 3.56E-30 | 595.2108 | 644.3037 | 548.9321 | 1591.507 | 1469.569 | 1673.291 |
| 17710 LOC119612 | 7.249848 | 1.404607 | 1.015553 | 1.383097 | 0.166635 | 0.250141 | 2.168345 | 4.926706 | 4.87012  | 2.232127 | 19.252   | 10.04979 |
| 15553 H19       | 22.01965 | 1.4044   | 0.809373 | 1.73517  | 0.082711 | 0.141379 | 2.168345 | 11.49565 | 22.2634  | 37.94616 | 49.19955 | 9.044815 |
| 475 PROS1       | 5170.719 | 1.404227 | 0.094514 | 14.85727 | 6.24E-50 | 3.49E-48 | 2706.637 | 3090.14  | 2711.265 | 7368.251 | 7439.877 | 7208.193 |
| 14718 FAM83C    | 12.99434 | 1.403609 | 0.743983 | 1.886614 | 0.059212 | 0.106955 | 6.505036 | 5.474118 | 9.044508 | 20.08914 | 27.80844 | 9.044815 |
| 3164 IFI44      | 153.3023 | 1.403144 | 0.226239 | 6.202039 | 5.57E-10 | 4.68E-09 | 88.90216 | 85.94365 | 77.22618 | 191.9629 | 256.6933 | 219.0855 |
| 14190 GIMAP2    | 12.47012 | 1.403097 | 0.709047 | 1.978851 | 0.047833 | 0.089615 | 5.420864 | 8.758589 | 6.261582 | 22.32127 | 14.97377 | 17.08465 |
| 15578 LOC119622 | 9.550374 | 1.40274  | 0.809626 | 1.732579 | 0.083171 | 0.141929 | 4.878777 | 4.379295 | 6.261582 | 15.62489 | 17.11289 | 9.044815 |
| 8472 LOC119622  | 60.67674 | 1.40234  | 0.429919 | 3.26187  | 0.001107 | 0.003473 | 36.86187 | 31.74989 | 29.91645 | 95.98146 | 128.3466 | 41.20416 |
| 6065 WFDC3      | 75.72173 | 1.401408 | 0.33854  | 4.139566 | 4.81E-05 | 0.000153 | 43.36691 | 29.01283 | 52.17985 | 102.1778 | 132.6249 | 94.46807 |
| 14461 LOC119612 | 13.72644 | 1.401033 | 0.725138 | 1.932091 | 0.053348 | 0.098072 | 5.96295  | 6.568942 | 9.740239 | 20.08914 | 29.94755 | 10.04979 |
| 15878 LOC119612 | 11.54759 | 1.400996 | 0.829913 | 1.688123 | 0.091388 | 0.153009 | 5.420864 | 8.211177 | 4.87012  | 20.08914 | 25.66933 | 5.024897 |
| 1277 TPP1       | 1323.342 | 1.400197 | 0.14121  | 9.915672 | 3.56E-23 | 7.41E-22 | 628.2781 | 871.4796 | 683.2082 | 1832.576 | 1865.305 | 2059.203 |
| 22318 LOC119622 | 1.489334 | 1.40008  | 2.082577 | 0.672282 | 0.501404 | 0.597273 | 0.542086 | 1.094824 | 0.695731 | 4.464254 | 2.139111 | 0        |
| 15210 LOC119622 | 10.22497 | 1.399038 | 0.779525 | 1.794731 | 0.072697 | 0.127064 | 4.878777 | 6.02153  | 6.261582 | 13.39276 | 10.69555 | 20.09959 |
| 14907 LOC119622 | 11.73902 | 1.398768 | 0.754923 | 1.852863 | 0.063902 | 0.113962 | 5.96295  | 5.474118 | 7.653045 | 15.62489 | 25.66933 | 10.04979 |
| 8037 LOC119622  | 46.93358 | 1.398717 | 0.411108 | 3.402314 | 0.000668 | 0.00221  | 27.10432 | 20.80165 | 29.22072 | 95.98146 | 49.19955 | 59.29379 |
| 15040 LOC103232 | 13.89866 | 1.398554 | 0.766076 | 1.825607 | 0.067909 | 0.120032 | 8.673382 | 8.211177 | 5.565851 | 13.39276 | 38.50399 | 9.044815 |
| 20925 LOC103242 | 3.429354 | 1.398421 | 1.576001 | 0.887323 | 0.374905 | 0.476313 | 1.084173 | 1.642235 | 2.782925 | 2.232127 | 12.83466 | 0        |
| 5089 NNMT       | 81.83409 | 1.398364 | 0.301435 | 4.63903  | 3.50E-06 | 1.83E-05 | 50.95612 | 43.79295 | 40.35242 | 136.1597 | 94.12087 | 125.6224 |
| 23205 LRRTM1    | 1.206874 | 1.398319 | 2.644689 | 0.528727 | 0.596995 | 0.683952 | 0        | 0        | 2.087194 | 0        | 2.139111 | 3.014938 |
| 9686 LOC119612  | 27.6175  | 1.398139 | 0.476354 | 2.935086 | 0.003335 | 0.009152 | 13.55216 | 14.78012 | 17.39328 | 42.41041 | 36.36488 | 41.20416 |
| 16446 RBP5      | 8.564978 | 1.397795 | 0.884475 | 1.580367 | 0.114023 | 0.184318 | 2.168345 | 4.379295 | 7.653045 | 11.16063 | 14.97377 | 11.05477 |
| 7542 LOC103242  | 52.16833 | 1.397178 | 0.394024 | 3.545923 | 0.000391 | 0.001379 | 34.15144 | 21.89647 | 29.22072 | 80.35657 | 94.12087 | 53.26391 |
| 6471 NYAP1      | 119.1545 | 1.396795 | 0.353539 | 3.950891 | 7.79E-05 | 0.00032  | 45.53526 | 49.26706 | 101.5768 | 183.0344 | 213.9111 | 12       |



|       |           |          |          |          |          |          |          |          |          |          |          |          |          |
|-------|-----------|----------|----------|----------|----------|----------|----------|----------|----------|----------|----------|----------|----------|
| 2494  | MMP15     | 300.7183 | 1.395052 | 0.195333 | 7.141929 | 9.20E-13 | 9.81E-12 | 159.3734 | 149.9908 | 190.6304 | 406.2471 | 376.4835 | 521.5843 |
| 15056 | LOC103222 | 11.03082 | 1.394359 | 0.764668 | 1.823484 | 0.06823  | 0.120469 | 8.131296 | 4.926706 | 4.87012  | 20.08914 | 17.11289 | 11.05477 |
| 6314  | LOC119625 | 58.07877 | 1.39351  | 0.346715 | 4.019179 | 5.84E-05 | 0.000246 | 31.44101 | 27.918   | 36.17803 | 93.74933 | 89.84265 | 69.34358 |
| 1165  | EFNA5     | 695.9205 | 1.392937 | 0.135526 | 10.27799 | 8.86E-25 | 2.02E-23 | 348.5615 | 429.1709 | 374.9992 | 977.6716 | 981.8518 | 1063.268 |
| 17706 | LOC103222 | 7.110365 | 1.391766 | 1.006118 | 1.383304 | 0.166572 | 0.250095 | 1.084173 | 4.379295 | 6.261582 | 8.928508 | 14.97377 | 7.034856 |
| 1168  | ECHDC3    | 1080.269 | 1.391599 | 0.135509 | 10.26941 | 9.68E-25 | 2.20E-23 | 662.4295 | 519.4938 | 608.7649 | 1600.435 | 1401.117 | 1689.37  |
| 22228 | PDHA2     | 1.492529 | 1.391599 | 2.024194 | 0.687483 | 0.949178 | 0.588164 | 0.542086 | 0.547412 | 1.391463 | 4.464254 | 0        | 2.009959 |
| 5729  | TRPM1     | 81.1948  | 1.390852 | 0.322728 | 4.30968  | 1.63E-05 | 7.59E-05 | 33.06727 | 50.9093  | 50.09266 | 107.1421 | 145.4595 | 100.4979 |
| 3398  | ARID5A    | 126.4656 | 1.389891 | 0.23373  | 5.946559 | 2.74E-09 | 2.14E-08 | 67.21871 | 66.78424 | 75.83472 | 187.4987 | 177.5462 | 183.9112 |
| 20900 | LOC103222 | 2.469167 | 1.388417 | 1.559208 | 0.890463 | 0.373218 | 0.474736 | 1.084173 | 2.189647 | 0.695731 | 6.696381 | 2.139111 | 2.009959 |
| 12790 | FGD5      | 20.44611 | 1.38812  | 0.619385 | 2.241127 | 0.025018 | 0.052002 | 11.9259  | 11.49565 | 9.740239 | 37.94616 | 38.50399 | 13.06473 |
| 22707 | LOC119625 | 1.458329 | 1.387046 | 2.282328 | 0.607733 | 0.543364 | 0.63617  | 0.542086 | 1.094824 | 0.695731 | 0        | 6.417332 | 0        |
| 19718 | LOC103247 | 3.928383 | 1.386696 | 1.300495 | 1.066283 | 0.286296 | 0.386001 | 1.084173 | 3.831883 | 1.391463 | 6.696381 | 8.556443 | 2.009959 |
| 747   | PLS1      | 3194.742 | 1.386412 | 0.110979 | 12.49258 | 8.20E-36 | 2.92E-34 | 1767.202 | 1924.7   | 1614.097 | 4267.827 | 4545.61  | 5049.017 |
| 788   | USH1C     | 1212.525 | 1.385704 | 0.11376  | 12.18093 | 3.93E-34 | 1.33E-32 | 659.7191 | 694.1182 | 663.032  | 1660.702 | 1677.063 | 1920.516 |
| 1742  | LOC103235 | 364.9897 | 1.385299 | 0.160886 | 8.610451 | 7.28E-18 | 1.11E-16 | 199.4878 | 194.3312 | 213.5895 | 564.7281 | 462.0479 | 555.7536 |
| 12116 | LOC119625 | 25.48885 | 1.384974 | 0.581316 | 2.382482 | 0.017196 | 0.037732 | 9.757555 | 15.87494 | 16.00182 | 53.57105 | 40.6431  | 17.08465 |
| 7880  | LOC103216 | 43.21325 | 1.38374  | 0.401483 | 3.446575 | 0.000568 | 0.001915 | 27.4664  | 22.9913  | 20.87194 | 51.33892 | 79.14709 | 57.28383 |
| 15037 | LOC103235 | 12.73321 | 1.383134 | 0.757353 | 1.826275 | 0.067809 | 0.119884 | 7.047123 | 5.474118 | 8.348776 | 13.39276 | 32.08666 | 10.04979 |
| 23115 | LOC103235 | 0.978945 | 1.382207 | 2.554401 | 0.541108 | 0.588433 | 0.676768 | 1.084173 | 0.547412 | 0        | 2.232127 | 0        | 2.009959 |
| 4859  | LOC119624 | 115.2736 | 1.381881 | 0.289525 | 4.772928 | 1.82E-06 | 9.93E-06 | 72.09749 | 47.62483 | 70.9646  | 180.8023 | 192.52   | 127.6324 |
| 22969 | NKAPL     | 1.243902 | 1.381318 | 2.428771 | 0.568731 | 0.569539 | 0.659172 | 0        | 0        | 2.087194 | 2.232127 | 2.139111 | 1.004979 |
| 22970 | LOC103235 | 1.243902 | 1.381318 | 2.428771 | 0.568731 | 0.569539 | 0.659172 | 0        | 0        | 2.087194 | 2.232127 | 2.139111 | 1.004979 |
| 16375 | LOC119625 | 8.571227 | 1.380911 | 0.866912 | 1.592907 | 0.111181 | 0.180504 | 4.878777 | 4.926706 | 4.174388 | 11.16063 | 19.252   | 7.034856 |
| 862   | SEC14L2   | 1180.906 | 1.380403 | 0.117843 | 11.71395 | 1.08E-31 | 3.33E-30 | 710.1331 | 587.9203 | 669.2936 | 1647.31  | 1724.123 | 1746.654 |
| 23549 | LOC119625 | 0.730318 | 1.380043 | 2.897011 | 0.476368 | 0.633812 | 0.715403 | 0.542086 | 0        | 0.695731 | 0        | 2.139111 | 1.004979 |
| 23550 | LOC119615 | 0.730318 | 1.380043 | 2.897011 | 0.476368 | 0.633812 | 0.715403 | 0.542086 | 0        | 0.695731 | 0        | 2.139111 | 1.004979 |
| 23551 | LOC119615 | 0.730318 | 1.380043 | 2.897011 | 0.476368 | 0.633812 | 0.715403 | 0.542086 | 0        | 0.695731 | 0        | 2.139111 | 1.004979 |
| 23553 | LOC103222 | 0.730318 | 1.380043 | 2.897011 | 0.476368 | 0.633812 | 0.715403 | 0.542086 | 0        | 0.695731 | 0        | 2.139111 | 1.004979 |
| 13845 | LOC103235 | 14.42791 | 1.379761 | 0.675927 | 2.041286 | 0.041222 | 0.079155 | 9.215468 | 8.211177 | 6.261582 | 17.85702 | 29.94755 | 15.07469 |
| 18434 | LOC103218 | 5.157315 | 1.379005 | 1.095167 | 1.259172 | 0.207968 | 0.299926 | 2.710432 | 1.642235 | 4.174388 | 6.696381 | 10.69555 | 5.024897 |
| 23127 | LOC103235 | 0.979833 | 1.378573 | 2.553866 | 0.539799 | 0.589336 | 0.677409 | 0.542086 | 1.094824 | 0        | 2.232127 | 0        | 2.009959 |
| 16545 | LOC119625 | 7.844991 | 1.378222 | 0.8799   | 1.56634  | 0.117269 | 0.188431 | 3.794605 | 4.926706 | 4.174388 | 11.16063 | 14.97377 | 8.039836 |
| 9091  | MYBPC2    | 57.90814 | 1.37809  | 0.446616 | 3.085629 | 0.002031 | 0.00594  | 28.18849 | 19.70683 | 48.00546 | 104.91   | 98.39909 | 48.23901 |
| 777   | KBTBD11   | 3187.46  | 1.377894 | 0.112389 | 12.26004 | 1.48E-34 | 5.08E-33 | 1647.943 | 1961.924 | 1707.325 | 4448.629 | 4303.891 | 5055.047 |
| 4390  | TMOD1     | 104.9025 | 1.377059 | 0.27079  | 5.085343 | 3.67E-07 | 2.22E-06 | 46.07734 | 64.04718 | 65.39875 | 151.7846 | 143.3204 | 158.7868 |
| 21207 | LOC119625 | 2.721816 | 1.377025 | 1.621974 | 0.848981 | 0.395892 | 0.496271 | 0        | 1.094824 | 3.478657 | 4.464254 | 4.278221 | 3.014938 |
| 1177  | LIN7A     | 871.1877 | 1.376955 | 0.134493 | 10.2381  | 1.34E-24 | 3.02E-23 | 448.3054 | 558.3601 | 446.6595 | 1272.312 | 1200.041 | 1301.448 |
| 21170 | LOC119615 | 2.918077 | 1.376624 | 1.610291 | 0.854892 | 0.392611 | 0.493036 | 2.168345 | 0.547412 | 2.087194 | 0        | 10.69555 | 2.009959 |
| 19421 | LOC103226 | 4.995418 | 1.376358 | 1.234538 | 1.114877 | 0.264903 | 0.36262  | 2.168345 | 0.547412 | 5.565851 | 13.39276 | 4.278221 | 4.019918 |
| 23537 | CXCL11    | 0.746708 | 1.375244 | 2.878559 | 0.477754 | 0.632825 | 0.714635 | 0        | 0.547412 | 0.695731 | 2.232127 | 0        | 1.004979 |
| 23538 | LOC103248 | 0.746708 | 1.375244 | 2.878559 | 0.477754 | 0.632825 | 0.714635 | 0        | 0.547412 | 0.695731 | 2.232127 | 0        | 1.004979 |
| 23540 | TRNAG-CC  | 0.746708 | 1.375244 | 2.878559 | 0.477754 | 0.632825 | 0.714635 | 0        | 0.547412 | 0.695731 | 2.232127 | 0        | 1.004979 |
| 23541 | NAT2      | 0.746708 | 1.375244 | 2.878559 | 0.477754 | 0.632825 | 0.714635 | 0        | 0.547412 | 0.695731 | 2.232127 | 0        | 1.004979 |
| 23542 | LOC119615 | 0.746708 | 1.375244 | 2.878559 | 0.477754 | 0.632825 | 0.714635 | 0        | 0.547412 | 0.695731 | 2.232127 | 0        | 1.004979 |
| 3969  | LOC103222 | 127.9454 | 1.375162 | 0.254692 | 5.399313 | 6.69E-08 | 4.48E-07 | 71.01331 | 65.14201 | 77.22618 | 227.677  | 149.7377 | 176.8764 |
| 8686  | SAMD5     | 35.84202 | 1.375097 | 0.428695 | 3.207633 | 0.001338 | 0.004096 | 21.68345 | 17.51718 | 20.17621 | 53.57105 | 59.8951  | 42.20914 |
| 23563 | LOC103235 | 0.731206 | 1.375051 | 2.896028 | 0.474806 | 0.634925 | 0.71634  | 0        | 0.547412 | 0.695731 | 0        | 2.139111 | 1.004979 |
| 15205 | MFSD2B    | 12.13339 | 1.374093 | 0.765266 | 1.795575 | 0.072562 | 0.12687  | 4.336691 | 6.568942 | 9.044508 | 24.5534  | 19.252   | 9.044815 |
| 21962 | IL22      | 1.975107 | 1.373529 | 1.870851 | 0.734173 | 0.462843 | 0.560272 | 0        | 0.547412 | 2.782925 | 2.232127 | 4.278221 | 2.009959 |
| 20951 | LOC103222 | 2.437274 | 1.372723 | 1.551264 | 0.884906 | 0.376207 | 0.477374 | 1.626259 | 1.642235 | 0.695731 | 2.232127 | 6.417332 | 2.009959 |
| 14270 | LOC103212 | 14.37694 | 1.372492 | 0.698007 | 1.9663   | 0.049264 | 0.091779 | 7.047123 | 8.211177 | 8.348776 | 33.4819  | 17.11289 | 12.05975 |
| 20934 | TAGLN3    | 3.469577 | 1.372205 | 1.548747 | 0.88601  | 0.375612 | 0.47673  | 1.084173 | 1.094824 | 3.478657 | 4.464254 | 10.69555 | 0        |
| 20998 | LOC119625 | 2.438162 | 1.372077 | 1.562438 | 0.878164 | 0.379855 | 0.480632 | 1.084173 | 2.189647 | 0.695731 | 2.232127 | 6.417332 | 2.009959 |
| 1076  | ADCK5     | 1288.199 | 1.371974 | 0.129155 | 10.6227  | 2.34E-26 | 5.77E-25 | 806.6245 | 619.6702 | 729.1265 | 1886.147 | 1736.958 | 1950.665 |
| 17562 | LOC103248 | 6.902186 | 1.371557 | 0.975873 | 1.405466 | 0.159883 | 0.242027 | 3.252518 | 3.831883 | 4.174388 | 11.16063 | 14.97377 | 4.019918 |
| 611   | STAT6     | 2940.58  | 1.370471 | 0.101662 | 13.48068 | 2.03E-41 | 8.84E-40 | 1612.165 | 1764.856 | 1545.915 | 4120.506 | 4068.588 | 4531.452 |
| 1050  | SCAMP5    | 611.482  | 1.370183 | 0.127363 | 10.75811 | 5.43E-27 | 1.37E-25 | 343.6828 | 356.3651 | 323.5151 | 857.1368 | 887.7309 | 900.4616 |
| 7016  | ACTC1     | 58.27163 | 1.370132 | 0.367551 | 3.727736 | 0.000193 | 0.000732 | 34.69353 | 28.46541 | 34.09084 | 62.49956 | 115.512  | 74.36848 |
| 559   | PACIN1    | 4163.154 | 1.370022 | 0.097346 | 14.07369 | 5.51E-45 | 2.62E-43 | 2261.042 | 2454.047 | 2256.257 | 5903.976 | 5636.557 | 6467.043 |
| 4720  | GRM8      | 84.82014 | 1.369772 | 0.281278 | 4.869816 | 1.12E-06 | 6.29E-06 | 44.45108 | 46.53    | 50.78839 | 133.9276 | 117.6511 | 115.5726 |
| 20117 | LOC103234 | 3.172562 | 1.369154 | 1.356046 | 1.009666 | 0.312655 | 0.41318  | 1.084173 | 2.189647 | 2.087194 | 2.232127 | 6.417332 | 5.024897 |
| 1776  | LOC103235 | 433.1494 | 1.368362 | 0.160597 | 8.520449 | 1.59E-17 | 2.38E-16 | 232.013  | 268.7792 | 226.8084 | 591.5136 | 573.2817 | 706.5006 |
| 14503 | LOC103215 | 12.2757  | 1.36799  | 0.711062 | 1.923868 | 0.054371 | 0.099666 | 4.878777 | 8.758589 | 6.957314 | 17.85702 | 17.11289 | 18.08963 |
| 999   | SEMA3B    | 3431.315 | 1.367935 | 0.124502 | 10.98727 | 4.40E-28 | 1.17E-26 | 2102.753 | 1680.007 | 1970.311 | 4845.948 | 4417.264 | 5571.606 |
| 21254 | LOC103225 | 2.460054 | 1.367935 | 1.625557 | 0.841518 | 0.400058 | 0.500402 | 1.084173 | 1.094824 | 2.087194 | 4.464254 | 0        | 6.029877 |
| 15577 | LOC103216 | 12.07427 | 1.367552 | 0.789297 | 1.732621 | 0.083163 | 0.141929 | 5.420864 | 8.758589 | 5.565851 | 17.85702 | 27.80844 | 7.034856 |
| 21063 | LOC119628 | 3.50631  | 1.366594 | 1.569282 | 0.87084  | 0.383841 | 0.484472 | 4.336691 | 0        | 1.391463 | 11.16063 | 2.139111 | 2.009959 |
| 16209 | LOC119624 | 10.26049 | 1.366528 | 0.840434 | 1.625979 | 0.103954 | 0.170499 | 7.589209 | 2.189647 | 7.653045 | 8.928508 | 17.11289 | 18.08963 |
| 11265 | LOC119624 | 22.97232 | 1.366323 | 0.532384 | 2.566423 | 0.010275 | 0.024249 | 13.01007 | 12.59047 | 13.2189  | 22.32127 | 38.50399 | 38.18922 |
| 539   | G         |          |          |          |          |          |          |          |          |          |          |          |          |



|       |            |           |          |          |          |          |          |          |          |          |          |          |          |
|-------|------------|-----------|----------|----------|----------|----------|----------|----------|----------|----------|----------|----------|----------|
| 19354 | CUNH2orf1  | 4.199068  | 1.364088 | 1.211009 | 1.126406 | 0.259994 | 0.357151 | 3.252518 | 2.189647 | 1.391463 | 8.928508 | 6.417332 | 3.014938 |
| 3889  | LOC119627  | 112.1179  | 1.36396  | 0.249953 | 5.456869 | 4.85E-08 | 3.31E-07 | 58.54533 | 68.42648 | 61.22436 | 174.1059 | 147.5986 | 162.8067 |
| 8921  | LOC119627  | 48.80341  | 1.363622 | 0.434407 | 3.139041 | 0.001695 | 0.005051 | 28.18849 | 15.32753 | 38.26523 | 69.19594 | 85.56443 | 56.27885 |
| 12003 | LOC119627  | 28.58378  | 1.363085 | 0.566704 | 2.405286 | 0.01616  | 0.035792 | 17.34676 | 12.59047 | 17.39328 | 33.4819  | 70.59065 | 20.09959 |
| 23533 | LOC119627  | 0.962555  | 1.36294  | 2.850069 | 0.478213 | 0.632499 | 0.714566 | 1.626259 | 0        | 0        | 0        | 2.139111 | 2.009959 |
| 17434 | LOC103245  | 6.394991  | 1.362703 | 0.959331 | 1.420471 | 0.155471 | 0.237063 | 3.794605 | 2.737059 | 4.174388 | 8.928508 | 10.69555 | 8.039836 |
| 16568 | LOC119627  | 8.111887  | 1.362217 | 0.871839 | 1.562465 | 0.118179 | 0.189629 | 2.710432 | 5.474118 | 5.565851 | 11.16063 | 10.69555 | 13.06473 |
| 23191 | LOC119627  | 0.963442  | 1.361985 | 2.566286 | 0.530722 | 0.595611 | 0.682779 | 1.084173 | 0.547412 | 0        | 0        | 2.139111 | 2.009959 |
| 3998  | TMC5       | 108.3278  | 1.36171  | 0.253284 | 5.376212 | 7.61E-08 | 5.06E-07 | 56.91907 | 67.87906 | 57.04997 | 151.7846 | 162.5724 | 153.7619 |
| 14690 | LOC103217  | 19.31782  | 1.360453 | 0.719205 | 1.891607 | 0.058543 | 0.10595  | 7.047123 | 7.663765 | 17.39328 | 24.5534  | 49.19955 | 10.04979 |
| 1751  | LOC103245  | 376.8667  | 1.360199 | 0.15834  | 8.590376 | 8.67E-18 | 1.32E-16 | 230.3867 | 191.0467 | 213.5895 | 537.9426 | 513.3866 | 574.8483 |
| 19695 | LOC103245  | 4.21948   | 1.360117 | 1.26996  | 1.070993 | 0.284173 | 0.383568 | 1.084173 | 1.094824 | 4.87012  | 6.696381 | 8.556443 | 3.014938 |
| 23321 | LOC119627  | 1.228399  | 1.359504 | 2.662276 | 0.510655 | 0.609593 | 0.694899 | 0        | 0        | 2.087194 | 0        | 4.278221 | 1.004979 |
| 14096 | LOC119627  | 14.83684  | 1.359367 | 0.681482 | 1.994722 | 0.046073 | 0.086889 | 7.047123 | 7.116354 | 10.43597 | 24.5534  | 27.80844 | 12.05975 |
| 4591  | DNM3       | 121.2036  | 1.359106 | 0.27468  | 4.94796  | 7.50E-07 | 4.34E-06 | 53.12446 | 84.84883 | 65.39875 | 160.7131 | 205.3546 | 157.7818 |
| 1028  | SNN        | 710.4215  | 1.358835 | 0.124935 | 10.87637 | 1.49E-27 | 3.86E-26 | 396.8072 | 406.727  | 394.4797 | 959.8146 | 1003.243 | 1101.457 |
| 1913  | EGFLAM     | 426.2489  | 1.358794 | 0.16629  | 8.171211 | 3.05E-16 | 4.24E-15 | 234.1813 | 206.3743 | 276.2054 | 658.4775 | 622.4812 | 559.7736 |
| 10657 | TRIM7      | 41.49003  | 1.358577 | 0.502854 | 2.701731 | 0.006898 | 0.017208 | 16.80468 | 16.96977 | 35.4823  | 73.66019 | 74.86887 | 31.15436 |
| 683   | A4GALT     | 2087.958  | 1.358358 | 0.105343 | 12.89468 | 4.82E-38 | 1.88E-36 | 1178.496 | 1183.504 | 1156.306 | 3031.228 | 2723.088 | 3255.129 |
| 15203 | RNF125     | 12.93096  | 1.358139 | 0.756296 | 1.795778 | 0.07253  | 0.126831 | 5.420864 | 4.379295 | 11.82743 | 26.78552 | 17.11289 | 12.05975 |
| 2696  | NATD1      | 227.8163  | 1.358081 | 0.198584 | 6.838837 | 7.98E-12 | 7.87E-11 | 134.4374 | 115.5039 | 135.6676 | 312.4978 | 290.9191 | 377.8723 |
| 14029 | ADAMTS8    | 14.80851  | 1.358077 | 0.676378 | 2.007865 | 0.044658 | 0.084627 | 7.589209 | 4.926706 | 12.52316 | 22.32127 | 21.39111 | 20.09959 |
| 19365 | LSMEM2     | 4.184453  | 1.357801 | 1.206618 | 1.125295 | 0.260464 | 0.357557 | 2.710432 | 2.737059 | 1.391463 | 6.696381 | 8.556443 | 3.014938 |
| 10903 | LOC103220  | 24.65621  | 1.357672 | 0.512271 | 2.650299 | 0.008042 | 0.019607 | 11.9259  | 13.13788 | 16.69755 | 40.17829 | 27.80844 | 38.18922 |
| 18532 | IL34       | 6.412966  | 1.357175 | 1.088839 | 1.246442 | 0.212602 | 0.304922 | 5.96295  | 0.547412 | 4.174388 | 8.928508 | 12.83466 | 6.029877 |
| 12858 | LOC119627  | 25.55129  | 1.356511 | 0.609174 | 2.226803 | 0.02596  | 0.053674 | 11.9259  | 13.6853  | 16.69755 | 40.17829 | 57.75599 | 13.06473 |
| 11284 | LOC103220  | 30.41048  | 1.3556   | 0.52927  | 2.561262 | 0.010429 | 0.024571 | 12.46799 | 15.32753 | 22.95914 | 42.41041 | 64.17332 | 25.12449 |
| 5109  | LOC119627  | 106.4605  | 1.354662 | 0.292991 | 4.623568 | 3.77E-06 | 1.96E-05 | 72.63957 | 46.53    | 59.13717 | 171.8738 | 168.9897 | 119.5926 |
| 19387 | LOC103220  | 4.955349  | 1.354147 | 1.209496 | 1.119596 | 0.262886 | 0.360486 | 1.084173 | 4.926706 | 2.087194 | 8.928508 | 10.69555 | 2.009959 |
| 2373  | PLBD2      | 319.918   | 1.354    | 0.185291 | 7.307409 | 2.72E-13 | 3.05E-12 | 207.077  | 153.8227 | 180.1944 | 468.7467 | 402.1528 | 507.5146 |
| 18081 | LOC119619  | 6.715012  | 1.353066 | 1.020446 | 1.325955 | 0.184855 | 0.271797 | 5.96295  | 1.642235 | 3.478657 | 15.62489 | 8.556443 | 5.024897 |
| 14667 | LOC119627  | 15.16569  | 1.35302  | 0.714193 | 1.894473 | 0.058162 | 0.105423 | 4.878777 | 6.02153  | 14.61036 | 29.01765 | 21.39111 | 15.07469 |
| 9246  | LOC119627  | 35.7308   | 1.35271  | 0.444478 | 3.043366 | 0.002339 | 0.006727 | 17.34676 | 20.25424 | 22.2634  | 46.87467 | 68.45154 | 39.1942  |
| 7894  | LOC103245  | 53.74562  | 1.352429 | 0.392916 | 3.44203  | 0.000577 | 0.001944 | 37.40396 | 20.25424 | 33.39511 | 58.0353  | 91.98176 | 81.40334 |
| 11245 | LOC103217  | 30.82118  | 1.352393 | 0.525905 | 2.571551 | 0.010124 | 0.023936 | 18.97302 | 11.49565 | 20.87194 | 60.26743 | 49.19955 | 24.11951 |
| 630   | LOC103245  | 3061.489  | 1.351922 | 0.101819 | 13.27773 | 3.12E-40 | 1.32E-38 | 1666.373 | 1872.148 | 1634.273 | 4261.13  | 4256.83  | 4678.179 |
| 15568 | CA5A       | 10.6086   | 1.351855 | 0.779812 | 1.733564 | 0.082995 | 0.141729 | 3.794605 | 7.663765 | 6.261582 | 15.62489 | 19.252   | 11.05477 |
| 16925 | APOA5      | 11.33597  | 1.351845 | 0.899626 | 1.502675 | 0.132923 | 0.208789 | 2.168345 | 3.831883 | 13.2189  | 8.928508 | 27.80844 | 12.05975 |
| 13346 | CUNH11orf1 | 16.16927  | 1.351527 | 0.632183 | 2.137875 | 0.032527 | 0.064793 | 7.589209 | 10.94824 | 9.044508 | 15.62489 | 25.66933 | 28.13943 |
| 1604  | CDHR2      | 377.8401  | 1.351495 | 0.150746 | 8.965364 | 3.09E-19 | 5.13E-18 | 214.6662 | 217.3225 | 206.6322 | 566.9603 | 502.691  | 558.7686 |
| 2993  | COMMD5     | 874.9343  | 1.351233 | 0.210123 | 6.430684 | 1.27E-10 | 1.13E-09 | 613.0997 | 309.2877 | 557.2808 | 1200.884 | 1187.206 | 1381.847 |
| 15841 | BMERB1     | 10.44227  | 1.350866 | 0.798172 | 1.692448 | 0.090561 | 0.151982 | 5.96295  | 3.831883 | 7.653045 | 22.32127 | 12.83466 | 10.04979 |
| 936   | CSTB       | 1059.932  | 1.349744 | 0.119567 | 11.28859 | 1.49E-29 | 4.24E-28 | 658.6349 | 546.8644 | 587.1973 | 1475.436 | 1533.742 | 1557.718 |
| 10454 | LOC119627  | 29.66933  | 1.349733 | 0.489966 | 2.75475  | 0.005874 | 0.014935 | 14.09425 | 14.78012 | 20.87194 | 44.64254 | 53.47777 | 30.14938 |
| 20953 | LOC119618  | 2.492999  | 1.349537 | 1.525266 | 0.884788 | 0.376271 | 0.47741  | 1.626259 | 1.094824 | 1.391463 | 6.696381 | 2.139111 | 2.009959 |
| 4682  | SLC29A3    | 96.36997  | 1.348842 | 0.275575 | 4.894645 | 9.85E-07 | 5.59E-06 | 55.8349  | 61.85754 | 45.22254 | 124.9991 | 147.5986 | 142.7071 |
| 6440  | LOC119618  | 73.76773  | 1.348001 | 0.340002 | 3.964683 | 7.35E-05 | 0.000303 | 34.69353 | 48.71965 | 41.04815 | 80.35657 | 143.3204 | 94.46807 |
| 15428 | LOC119627  | 14.89148  | 1.347718 | 0.767507 | 1.755967 | 0.079094 | 0.136292 | 9.215468 | 3.831883 | 12.52316 | 6.696381 | 29.94755 | 27.13445 |
| 1096  | TNFSF9     | 866.4352  | 1.347517 | 0.12791  | 10.53492 | 5.96E-26 | 1.45E-24 | 508.477  | 476.2483 | 484.9248 | 1223.206 | 1120.894 | 1384.862 |
| 11281 | ZPLD1      | 25.89226  | 1.346781 | 0.525735 | 2.561171 | 0.010416 | 0.024545 | 10.84173 | 20.80165 | 11.82743 | 37.9616  | 42.78221 | 31.15436 |
| 19171 | CUNH2orf1  | 5.7223001 | 1.346001 | 1.162815 | 1.157536 | 0.247053 | 0.342596 | 0.542086 | 2.189647 | 6.957314 | 8.928508 | 10.69555 | 5.024897 |
| 20195 | LOC119627  | 3.424549  | 1.345958 | 1.349087 | 0.997681 | 0.318434 | 0.419191 | 3.252518 | 1.094824 | 1.391463 | 2.232127 | 8.556443 | 4.019918 |
| 664   | HBP1       | 1395.026  | 1.345957 | 0.103093 | 13.05573 | 5.89E-39 | 2.36E-37 | 803.372  | 751.049  | 810.527  | 1944.183 | 1995.79  | 2065.233 |
| 4660  | PLEKHF1    | 88.68638  | 1.344961 | 0.273731 | 4.913446 | 8.95E-07 | 5.11E-06 | 49.87195 | 50.9093  | 50.09266 | 122.767  | 119.7902 | 138.6872 |
| 18515 | LOC119627  | 5.423905  | 1.344813 | 1.076824 | 1.248869 | 0.211713 | 0.303991 | 2.710432 | 4.926706 | 1.391463 | 8.928508 | 8.556443 | 6.029877 |
| 8935  | LOC103220  | 65.51654  | 1.344713 | 0.428898 | 3.135273 | 0.001717 | 0.005109 | 28.18849 | 39.96106 | 41.74388 | 91.51721 | 145.4595 | 46.22906 |
| 633   | HTRA1      | 3265.124  | 1.344666 | 0.101479 | 13.25071 | 4.47E-40 | 1.88E-38 | 1915.733 | 1748.433 | 1874.3   | 4636.128 | 4335.977 | 5080.171 |
| 16367 | LOC103231  | 9.382981  | 1.344658 | 0.843409 | 1.594312 | 0.110866 | 0.180069 | 4.878777 | 2.737059 | 8.348776 | 11.16063 | 17.11289 | 12.05975 |
| 16733 | LOC103217  | 10.70596  | 1.344578 | 0.874938 | 1.53677  | 0.12435  | 0.197568 | 2.710432 | 8.758589 | 6.261582 | 20.08914 | 21.39111 | 5.024897 |
| 17730 | LOC119618  | 6.701284  | 1.344195 | 0.974465 | 1.379419 | 0.167766 | 0.251554 | 4.878777 | 2.737059 | 3.478657 | 13.39276 | 10.69555 | 5.024897 |
| 23568 | LOC119620  | 1.016861  | 1.34412  | 2.834499 | 0.4742   | 0.635357 | 0.716691 | 0.542086 | 1.094824 | 0        | 4.464254 | 0        | 0        |
| 328   | CPE        | 9119.24   | 1.343751 | 0.080151 | 16.76519 | 4.39E-63 | 3.55E-61 | 5157.952 | 5192.201 | 5117.104 | 12841.43 | 12815.41 | 13591.34 |
| 14809 | LOC103245  | 13.02693  | 1.343402 | 0.718061 | 1.870873 | 0.061363 | 0.110147 | 7.589209 | 5.474118 | 9.044508 | 11.16063 | 27.80844 | 17.08465 |
| 22756 | LOC103217  | 1.514942  | 1.343368 | 2.237938 | 0.60027  | 0.548326 | 0.640561 | 0        | 1.094824 | 1.391463 | 4.464254 | 2.139111 | 0        |
| 22757 | RAB36      | 1.514942  | 1.343368 | 2.237938 | 0.60027  | 0.548326 | 0.640561 | 0        | 1.094824 | 1.391463 | 4.464254 | 2.139111 | 0        |
| 844   | GRN        | 19262.5   | 1.34335  | 0.113854 | 11.79885 | 3.96E-32 | 1.25E-30 | 11344.24 | 9849.581 | 11483.74 | 27055.61 | 24520.63 | 31321.19 |
| 832   | LRP5       | 1542.613  | 1.343111 | 0.113213 | 11.86359 | 1.83E-32 | 5.85E-31 | 870.5907 | 849.5831 | 900.9721 | 2145.074 | 2034.294 | 2455.165 |
| 2283  | NOXA1      | 321.7928  | 1.342644 | 0.180365 | 7.44402  | 9.77E-14 | 1.14E-12 | 191.8986 | 156.0124 | 200.3706 | 430.8005 | 432.1004 | 519.5744 |
| 887   | YPEL2      | 1516.026  | 1.342624 | 0.116096 | 11.56473 | 6.22E-31 | 1.86E-29 | 887.9375 | 861.6262 | 825.8331 | 2178.556 | 1942.312 | 2399.891 |
| 13376 | CDRT1      | 24.53758  | 1.342278 | 0.629728 | 2.131521 | 0.033046 | 0.06568  | 11.38381 | 16.96977 | 12.52316 | 31.24    |          |          |



|       |           |          |          |          |          |          |          |          |          |          |          |          |          |
|-------|-----------|----------|----------|----------|----------|----------|----------|----------|----------|----------|----------|----------|----------|
| 22917 | TRNAP-UG  | 1.67543  | 1.340802 | 2.324728 | 0.576757 | 0.564104 | 0.654363 | 1.626259 | 0        | 1.391463 | 0        | 0        | 7.034856 |
| 18673 | LOC119624 | 5.709204 | 1.340708 | 1.088546 | 1.231651 | 0.218079 | 0.310471 | 5.420864 | 2.737059 | 1.391463 | 13.39276 | 4.278221 | 7.034856 |
| 1942  | SSBP3     | 445.6121 | 1.340614 | 0.165317 | 8.109337 | 5.09E-16 | 6.97E-15 | 225.5079 | 302.1713 | 228.8956 | 649.549  | 620.3421 | 647.2068 |
| 18978 | TLOC2     | 5.20853  | 1.34057  | 1.127357 | 1.189127 | 0.23439  | 0.328341 | 1.626259 | 1.642235 | 5.565851 | 6.696381 | 10.69555 | 5.024897 |
| 22880 | LOC119625 | 1.983663 | 1.340044 | 2.301905 | 0.582146 | 0.560468 | 0.65115  | 3.252518 | 0        | 0        | 2.232127 | 6.417332 | 0        |
| 11998 | JAML      | 20.27882 | 1.339876 | 0.556699 | 2.406821 | 0.016092 | 0.035657 | 11.38381 | 9.306001 | 13.91463 | 31.24978 | 25.66933 | 30.14938 |
| 16708 | KCNJ5     | 10.16888 | 1.339441 | 0.869156 | 1.541082 | 0.132397 | 0.196184 | 8.131296 | 3.831883 | 4.87012  | 15.62489 | 23.53022 | 5.024897 |
| 20831 | LOC119627 | 2.716478 | 1.339266 | 1.48811  | 0.899978 | 0.368132 | 0.469797 | 0.542086 | 2.737059 | 1.391463 | 4.464254 | 2.139111 | 5.024897 |
| 16465 | MYL4      | 8.608523 | 1.339116 | 0.848319 | 1.578553 | 0.114439 | 0.184796 | 5.96295  | 3.284471 | 5.565851 | 8.928508 | 12.83466 | 15.07469 |
| 12270 | MSH4      | 24.40084 | 1.339095 | 0.569614 | 2.350883 | 0.018729 | 0.040579 | 13.01007 | 11.49565 | 16.69755 | 22.32127 | 57.75599 | 25.12449 |
| 19238 | LOC119629 | 5.20698  | 1.338945 | 1.167637 | 1.146713 | 0.2515   | 0.347548 | 5.420864 | 1.094824 | 2.087194 | 8.928508 | 10.69555 | 3.014938 |
| 20225 | LOC119629 | 5.008718 | 1.338884 | 1.350043 | 0.991734 | 0.321327 | 0.422372 | 1.626259 | 0        | 6.957314 | 11.16063 | 4.278221 | 6.029877 |
| 1947  | EPHX2     | 520.4557 | 1.338161 | 0.165162 | 8.102124 | 5.40E-16 | 7.37E-15 | 319.2889 | 250.7146 | 317.9492 | 714.2806 | 665.2634 | 855.2375 |
| 22901 | PGAM2     | 1.98113  | 1.338022 | 2.310571 | 0.579087 | 0.56253  | 0.653008 | 0        | 0.547412 | 2.782925 | 0        | 8.556443 | 0        |
| 12288 | LOC103231 | 20.2952  | 1.337517 | 0.569916 | 2.346867 | 0.018932 | 0.040959 | 8.673382 | 13.6853  | 11.82743 | 31.24978 | 34.22577 | 22.10955 |
| 10754 | LOC10324  | 30.00547 | 1.337308 | 0.499269 | 2.678533 | 0.007395 | 0.01828  | 13.01007 | 18.612   | 18.78475 | 46.87467 | 55.61688 | 27.13445 |
| 9108  | XKR4      | 36.67283 | 1.337052 | 0.433999 | 3.08077  | 0.002065 | 0.006026 | 18.97302 | 26.82318 | 16.69755 | 44.64254 | 55.61688 | 57.28383 |
| 5930  | LOC119619 | 69.7458  | 1.336851 | 0.318766 | 4.19383  | 2.74E-05 | 0.000123 | 44.99317 | 33.39212 | 39.65669 | 104.91   | 109.0946 | 86.42823 |
| 15506 | LOC103216 | 13.473   | 1.336406 | 0.766668 | 1.743136 | 0.08131  | 0.139406 | 8.131296 | 6.568942 | 7.653045 | 26.78552 | 25.66933 | 6.029877 |
| 17833 | TOX       | 6.672942 | 1.336218 | 0.974143 | 1.371686 | 0.170161 | 0.253672 | 3.252518 | 4.379295 | 3.478657 | 8.928508 | 14.97377 | 5.024897 |
| 5702  | MRAP2     | 73.40533 | 1.335922 | 0.30883  | 4.325753 | 1.52E-05 | 7.09E-05 | 43.36691 | 33.93953 | 48.00546 | 104.91   | 102.6773 | 107.5328 |
| 910   | RPS6KA5   | 1160.439 | 1.335758 | 0.116949 | 11.42175 | 3.26E-30 | 9.51E-29 | 600.6317 | 717.1095 | 657.4661 | 1620.524 | 1734.819 | 1632.087 |
| 21867 | LOC119619 | 3.004961 | 1.334681 | 1.779109 | 0.750196 | 0.453137 | 0.550899 | 1.084173 | 3.831883 | 0        | 6.696381 | 6.417332 | 0        |
| 1825  | SYT11     | 422.1243 | 1.333867 | 0.159111 | 8.383229 | 5.15E-17 | 7.50E-16 | 243.3968 | 268.7792 | 207.3279 | 602.6743 | 575.4208 | 635.147  |
| 22480 | LOC119625 | 1.514054 | 1.333617 | 2.078008 | 0.641776 | 0.521018 | 0.616132 | 0.542086 | 0.547412 | 1.391463 | 4.464254 | 2.139111 | 0        |
| 22481 | LOC103246 | 1.514054 | 1.333617 | 2.078008 | 0.641776 | 0.521018 | 0.616132 | 0.542086 | 0.547412 | 1.391463 | 4.464254 | 2.139111 | 0        |
| 19070 | LOC119625 | 4.447267 | 1.333604 | 1.135584 | 1.174377 | 0.240244 | 0.334918 | 2.168345 | 3.284471 | 2.087194 | 6.696381 | 6.417332 | 6.029877 |
| 2603  | TP53INP2  | 295.2646 | 1.332778 | 0.191015 | 6.97736  | 3.01E-12 | 3.07E-11 | 159.9155 | 201.4475 | 141.9292 | 383.9258 | 449.2132 | 435.1561 |
| 21785 | SERPINB5  | 2.232064 | 1.32835  | 1.744326 | 0.761526 | 0.446343 | 0.544688 | 1.084173 | 0        | 2.782925 | 2.232127 | 4.278221 | 3.014938 |
| 1151  | BNC2      | 675.9258 | 1.328321 | 0.128837 | 10.3101  | 6.34E-25 | 1.47E-23 | 380.0025 | 417.1278 | 358.3017 | 966.511  | 932.6523 | 1000.96  |
| 4058  | TNNT2     | 128.453  | 1.328319 | 0.249349 | 5.327143 | 9.98E-08 | 6.54E-07 | 67.21871 | 81.56436 | 70.26887 | 158.481  | 220.3284 | 172.8565 |
| 14482 | LOC119625 | 15.51623 | 1.328216 | 0.68864  | 1.928752 | 0.053762 | 0.098692 | 13.01007 | 8.211177 | 5.565851 | 22.32127 | 12.83466 | 31.15436 |
| 18179 | CLCA2     | 6.912395 | 1.328193 | 1.017116 | 1.305843 | 0.191606 | 0.280205 | 2.710432 | 2.189647 | 6.957314 | 4.464254 | 17.11289 | 8.039836 |
| 21142 | LOC119619 | 2.965271 | 1.327381 | 1.544643 | 0.859345 | 0.39015  | 0.490594 | 2.710432 | 2.189647 | 0        | 4.464254 | 6.417332 | 2.009959 |
| 12700 | RNF165    | 22.18051 | 1.32721  | 0.587532 | 2.258957 | 0.023886 | 0.050001 | 12.46799 | 15.32753 | 9.740239 | 20.08914 | 51.33866 | 24.11951 |
| 1978  | ATP6V0B   | 2488.033 | 1.327189 | 0.165173 | 8.035128 | 9.35E-16 | 1.26E-14 | 1634.39  | 1011.617 | 1609.922 | 3587.028 | 3281.396 | 3803.847 |
| 21920 | LOC119619 | 1.747179 | 1.326781 | 1.789801 | 0.741301 | 0.458511 | 0.556091 | 1.084173 | 1.094824 | 0.695731 | 4.464254 | 2.139111 | 1.004979 |
| 576   | LOC103219 | 2601.604 | 1.324491 | 0.095684 | 13.84233 | 1.42E-43 | 6.53E-42 | 1454.96  | 1539.869 | 1462.427 | 3609.349 | 3589.428 | 3953.589 |
| 15279 | LOC103233 | 11.43023 | 1.324269 | 0.742496 | 1.783536 | 0.074499 | 0.129626 | 8.131296 | 4.926706 | 6.261582 | 20.08914 | 17.11289 | 12.05975 |
| 15693 | LOC119625 | 16.10638 | 1.323765 | 0.770264 | 1.718587 | 0.08569  | 0.145164 | 11.9259  | 5.474118 | 9.740239 | 13.39276 | 47.06043 | 9.044815 |
| 1474  | SLC31A2   | 879.1809 | 1.32346  | 0.142026 | 9.318456 | 1.18E-20 | 2.13E-19 | 548.0493 | 451.6147 | 509.9711 | 1165.17  | 1155.12  | 1445.16  |
| 957   | ADGRG1    | 10543.06 | 1.322147 | 0.118349 | 11.17164 | 5.61E-29 | 1.56E-27 | 6429.144 | 5474.666 | 6173.224 | 14569.09 | 13275.32 | 17336.9  |
| 21843 | LOC119619 | 2.720194 | 1.322076 | 1.753335 | 0.754035 | 0.450828 | 0.548676 | 0        | 3.831883 | 0.695731 | 2.232127 | 8.556443 | 1.004979 |
| 6775  | COL26A1   | 69.29274 | 1.32205  | 0.345565 | 3.825764 | 0.00013  | 0.000512 | 41.74065 | 27.37059 | 50.09266 | 84.82083 | 111.2338 | 100.4979 |
| 15320 | GRIN2C    | 12.93338 | 1.321876 | 0.744226 | 1.776175 | 0.075704 | 0.13137  | 7.589209 | 7.116354 | 6.957314 | 20.08914 | 27.80844 | 8.039836 |
| 878   | CCDC69    | 3038.145 | 1.321839 | 0.113621 | 11.63377 | 2.78E-31 | 8.40E-30 | 1657.158 | 1965.208 | 1586.963 | 4397.29  | 4053.615 | 4568.637 |
| 977   | SMIM29    | 1022.629 | 1.321553 | 0.118997 | 11.10573 | 1.18E-28 | 3.20E-27 | 621.7731 | 530.442  | 601.1119 | 1529.007 | 1403.257 | 1450.185 |
| 8531  | LOC119625 | 48.37839 | 1.321377 | 0.40707  | 3.246072 | 0.00117  | 0.003646 | 29.27266 | 18.06459 | 35.4823  | 64.73168 | 83.42532 | 59.29379 |
| 18544 | LOC103220 | 6.400586 | 1.321163 | 1.061927 | 1.244118 | 0.213456 | 0.306014 | 2.168345 | 3.284471 | 5.565851 | 2.232127 | 17.11289 | 8.039836 |
| 22931 | LOC103247 | 2.052358 | 1.321019 | 2.300229 | 0.574299 | 0.565765 | 0.655919 | 0        | 0        | 3.478657 | 6.696381 | 2.139111 | 0        |
| 18726 | LOC103233 | 5.199998 | 1.320428 | 1.075926 | 1.227248 | 0.21973  | 0.312237 | 2.168345 | 3.831883 | 2.782925 | 6.696381 | 10.69555 | 5.024897 |
| 17347 | NEK5      | 7.739077 | 1.320307 | 0.917157 | 1.439564 | 0.149991 | 0.229867 | 2.168345 | 5.474118 | 5.565851 | 15.62489 | 8.556443 | 9.044815 |
| 628   | GRINA     | 3620.485 | 1.319854 | 0.099174 | 13.30844 | 2.07E-40 | 8.75E-39 | 2079.985 | 2080.712 | 2055.886 | 5214.249 | 4695.348 | 5596.731 |
| 1513  | LOC119627 | 440.7206 | 1.319827 | 0.143249 | 9.213497 | 3.16E-20 | 5.55E-19 | 252.0702 | 250.7146 | 251.8548 | 638.3883 | 667.4025 | 583.8931 |
| 20298 | LOC119627 | 4.234259 | 1.319409 | 1.388426 | 0.950291 | 0.341964 | 0.443946 | 2.710432 | 0.547412 | 4.174388 | 8.928508 | 0        | 9.044815 |
| 20470 | CD38      | 3.735585 | 1.319289 | 1.346789 | 0.979581 | 0.327293 | 0.428836 | 0.542086 | 1.094824 | 4.87012  | 4.464254 | 6.417332 | 5.024897 |
| 1447  | CTSC      | 554.1754 | 1.319244 | 0.140768 | 9.371781 | 7.13E-21 | 1.31E-19 | 320.9151 | 328.9945 | 303.3389 | 790.173  | 712.3239 | 869.3072 |
| 14963 | LOC103245 | 12.95889 | 1.31924  | 0.716435 | 1.841395 | 0.065564 | 0.116488 | 6.505036 | 9.853413 | 5.565851 | 26.78552 | 14.97377 | 14.06971 |
| 17930 | SASH3     | 7.960475 | 1.31868  | 0.973173 | 1.355031 | 0.175408 | 0.260079 | 3.252518 | 8.758589 | 1.391463 | 15.62489 | 10.69555 | 8.039836 |
| 16899 | LOC119627 | 8.484175 | 1.31743  | 0.874329 | 1.50679  | 0.131865 | 0.207445 | 4.878777 | 3.831883 | 5.565851 | 15.62489 | 14.97377 | 6.029877 |
| 20791 | LOC119618 | 3.301456 | 1.31725  | 1.454207 | 0.90582  | 0.365031 | 0.466757 | 1.626259 | 1.094824 | 2.782925 | 11.16063 | 2.139111 | 1.004979 |
| 6407  | LOC119625 | 70.86467 | 1.317103 | 0.331265 | 3.975982 | 7.01E-05 | 0.000291 | 40.11439 | 35.58177 | 47.30973 | 75.89232 | 102.6773 | 123.6125 |
| 22909 | LOC103233 | 1.483049 | 1.316692 | 2.276362 | 0.578419 | 0.562981 | 0.653318 | 0.542086 | 0.547412 | 1.391463 | 0        | 6.417332 | 0        |
| 17838 | HOATZ     | 9.262869 | 1.316681 | 0.960476 | 1.370864 | 0.170417 | 0.253983 | 2.168345 | 7.116354 | 6.261582 | 15.62489 | 21.39111 | 3.014938 |
| 20848 | LOC103245 | 3.000298 | 1.316386 | 1.464903 | 0.898617 | 0.368857 | 0.47036  | 1.084173 | 0.547412 | 3.478657 | 4.464254 | 6.417332 | 2.009959 |
| 21787 | LOC103233 | 2.768061 | 1.316225 | 1.728729 | 0.761383 | 0.446428 | 0.544717 | 0        | 0.547412 | 4.174388 | 4.464254 | 6.417332 | 1.004979 |
| 12273 | LOC103222 | 23.63755 | 1.315924 | 0.559913 | 2.350229 | 0.018762 | 0.040641 | 17.88885 | 8.211177 | 14.61036 | 42.41041 | 23.53022 | 35.17428 |
| 6977  | CUNH1orf  | 57.7238  | 1.315656 | 0.351385 | 3.744195 | 0.000181 | 0.00069  | 28.18849 | 39.41365 | 31.30791 | 73.66019 | 98.39909 | 75.37346 |
| 4877  | DNAJB13   | 99.18565 | 1.315329 | 0.276626 | 4.754893 | 1.99E-06 | 1.08E-05 | 62.33993 | 61.31012 | 45.91827 | 140.624  | 158.2942 | 126.6274 |
| 5204  | LOC119627 | 87.73068 | 1.3149   | 0.287346 | 4.576012 | 4.74E-06 | 2.42E-05 | 42.82482 | 49.26706 |          |          |          |          |



|       |           |          |          |          |          |          |          |          |          |          |          |          |          |
|-------|-----------|----------|----------|----------|----------|----------|----------|----------|----------|----------|----------|----------|----------|
| 18752 | LOC103221 | 6.257387 | 1.312908 | 1.072356 | 1.224321 | 0.220831 | 0.313076 | 1.626259 | 1.642235 | 7.653045 | 11.16063 | 6.417332 | 9.044815 |
| 18121 | LOC103238 | 8.793602 | 1.312453 | 0.996394 | 1.317203 | 0.187771 | 0.27546  | 4.878777 | 1.642235 | 8.348776 | 15.62489 | 19.252   | 3.014938 |
| 3880  | LOC119618 | 147.7526 | 1.31189  | 0.239889 | 5.468748 | 4.53E-08 | 3.11E-07 | 77.51835 | 87.03848 | 88.35788 | 243.3018 | 222.4675 | 167.8316 |
| 18572 | THY1      | 6.697129 | 1.311382 | 1.058095 | 1.239381 | 0.215205 | 0.308056 | 1.084173 | 7.116354 | 3.478657 | 11.16063 | 4.278221 | 13.06473 |
| 18053 | ESPNL     | 7.040461 | 1.311314 | 0.983162 | 1.333772 | 0.182279 | 0.268425 | 4.878777 | 2.189647 | 4.87012  | 17.85702 | 6.417332 | 6.029877 |
| 19524 | GNLY      | 6.222465 | 1.309265 | 1.193456 | 1.097037 | 0.272625 | 0.371222 | 3.794605 | 0.547412 | 6.261582 | 4.464254 | 19.252   | 3.014938 |
| 1449  | MSRA      | 455.9218 | 1.309094 | 0.139748 | 0.967507 | 7.43E-21 | 1.36E-19 | 250.4439 | 274.2533 | 261.595  | 671.8702 | 633.1768 | 644.1918 |
| 12110 | TEKT5     | 24.37511 | 1.309049 | 0.549025 | 2.384317 | 0.017111 | 0.037566 | 10.84173 | 20.25424 | 10.43597 | 37.94616 | 40.6431  | 26.12947 |
| 20448 | TRNAT-AG  | 3.475598 | 1.308756 | 1.370981 | 0.954613 | 0.339773 | 0.441749 | 0.542086 | 2.189647 | 3.478657 | 4.464254 | 2.139111 | 8.039836 |
| 2197  | KLHL21    | 2466.607 | 1.308213 | 0.171808 | 7.614384 | 2.65E-14 | 3.21E-13 | 1664.747 | 1048.294 | 1547.307 | 3455.333 | 2960.529 | 4123.431 |
| 3730  | CUNH10or  | 138.3963 | 1.306638 | 0.232797 | 5.612779 | 1.99E-08 | 1.42E-07 | 76.43418 | 90.87036 | 71.66033 | 207.5878 | 181.8244 | 202.0009 |
| 2794  | ALS2CL    | 315.7921 | 1.306022 | 0.19474  | 6.706485 | 1.99E-11 | 1.90E-10 | 190.8144 | 147.8012 | 208.7194 | 473.2109 | 380.7617 | 493.4449 |
| 5487  | LOC119621 | 95.38462 | 1.305569 | 0.295719 | 4.4149   | 1.01E-05 | 4.90E-05 | 58.54533 | 43.79295 | 63.31155 | 104.91   | 154.016  | 147.732  |
| 20980 | TRNAY-GU  | 3.020108 | 1.305273 | 1.480899 | 0.881406 | 0.378098 | 0.479111 | 3.252518 | 1.094824 | 0.695731 | 8.928508 | 2.139111 | 2.009959 |
| 509   | OPTN      | 3789.452 | 1.304946 | 0.090085 | 14.48565 | 1.49E-47 | 7.80E-46 | 2152.083 | 2313.91  | 2085.107 | 5377.194 | 5324.246 | 5484.173 |
| 3221  | LOC119621 | 262.0237 | 1.303665 | 0.212344 | 6.139399 | 8.28E-10 | 6.84E-09 | 181.5989 | 129.7366 | 140.5377 | 339.2833 | 451.3524 | 329.6333 |
| 11012 | EGF       | 31.20545 | 1.303628 | 0.496283 | 2.626783 | 0.00862  | 0.020809 | 17.88885 | 12.04306 | 23.65487 | 46.87467 | 55.61688 | 31.15436 |
| 3463  | LOC103211 | 174.6794 | 1.303133 | 0.221077 | 5.894465 | 3.76E-09 | 2.89E-08 | 87.81799 | 114.4091 | 99.48959 | 285.7123 | 222.4675 | 238.1801 |
| 8444  | LOC103211 | 64.93208 | 1.302619 | 0.39828  | 3.270609 | 0.001073 | 0.003379 | 46.61943 | 19.15941 | 46.614   | 84.82083 | 106.9555 | 85.42325 |
| 2165  | ASB2      | 285.8897 | 1.301944 | 0.169867 | 7.664481 | 1.80E-14 | 2.20E-13 | 166.4205 | 167.508  | 161.4097 | 435.2648 | 363.6488 | 421.0864 |
| 14933 | LOC103241 | 16.068   | 1.301734 | 0.704501 | 1.847739 | 0.06464  | 0.115078 | 5.96295  | 8.211177 | 13.2189  | 29.01765 | 29.94755 | 10.04979 |
| 1061  | FBXO32    | 3713.866 | 1.301651 | 0.1218   | 10.68677 | 1.17E-26 | 2.94E-25 | 1981.326 | 2495.65  | 1955.701 | 5049.071 | 5058.997 | 5742.453 |
| 20746 | LOC119621 | 2.960239 | 1.301582 | 1.428821 | 0.910948 | 0.362323 | 0.464299 | 2.168345 | 1.094824 | 2.087194 | 2.232127 | 2.139111 | 8.039836 |
| 3314  | LOC103238 | 157.7722 | 1.300977 | 0.215737 | 6.030379 | 1.64E-09 | 1.31E-08 | 86.73382 | 100.1764 | 86.96642 | 216.5163 | 216.0502 | 240.1901 |
| 2949  | APLN      | 199.906  | 1.300386 | 0.200418 | 6.488365 | 8.68E-11 | 7.82E-10 | 106.791  | 111.672  | 129.406  | 276.7837 | 265.2497 | 309.5337 |
| 883   | PPL       | 4079.116 | 1.30023  | 0.112259 | 11.58241 | 5.06E-31 | 1.52E-29 | 2310.914 | 2557.508 | 2202.686 | 5834.78  | 5168.091 | 6400.714 |
| 23392 | TRNAW-CC  | 1.001358 | 1.299998 | 2.599072 | 0.500178 | 0.61695  | 0.701163 | 0.542086 | 1.094824 | 0        | 2.232127 | 2.139111 | 0        |
| 1024  | SORBS3    | 1281.121 | 1.299796 | 0.119376 | 10.88825 | 1.31E-27 | 3.40E-26 | 670.5608 | 826.0444 | 724.9521 | 1790.166 | 1777.601 | 1897.401 |
| 971   | ITM2B     | 9177.085 | 1.299525 | 0.116746 | 11.13122 | 8.84E-29 | 2.42E-27 | 4850.047 | 6256.37  | 4800.546 | 13102.59 | 12714.87 | 13338.09 |
| 930   | ID2       | 2283.343 | 1.299319 | 0.114599 | 11.33795 | 8.51E-30 | 2.43E-28 | 1229.452 | 1507.572 | 1219.617 | 3330.333 | 3234.335 | 3178.75  |
| 7270  | PNCK      | 80.63066 | 1.298959 | 0.356378 | 3.644887 | 0.000268 | 0.000978 | 30.89892 | 43.24553 | 65.39875 | 111.6063 | 141.1813 | 91.45313 |
| 19827 | LOC119621 | 4.472152 | 1.29846  | 1.236325 | 1.050257 | 0.2936   | 0.393673 | 3.794605 | 1.642235 | 2.087194 | 4.464254 | 12.83466 | 2.009959 |
| 8660  | LOC103211 | 67.91606 | 1.298253 | 0.403945 | 3.213934 | 0.001309 | 0.004019 | 52.58238 | 22.9913  | 41.74388 | 75.89232 | 136.9031 | 77.38342 |
| 23700 | LOC119621 | 0.985855 | 1.297699 | 2.861242 | 0.453544 | 0.650157 | 0.729301 | 0.542086 | 1.094824 | 0        | 0        | 4.278221 | 0        |
| 4092  | SHANK1    | 199.4686 | 1.29741  | 0.244642 | 5.303308 | 1.14E-07 | 7.39E-07 | 88.90216 | 117.6935 | 138.4505 | 281.248  | 344.3968 | 226.1204 |
| 5225  | FAM228A   | 82.17376 | 1.297282 | 0.28405  | 4.567093 | 4.95E-06 | 2.52E-05 | 52.04029 | 44.34036 | 45.91827 | 120.5349 | 117.6511 | 112.5577 |
| 19994 | CRIP3     | 4.026436 | 1.297154 | 1.258501 | 1.030714 | 0.302675 | 0.402452 | 2.710432 | 2.737059 | 1.391463 | 11.16063 | 2.139111 | 4.019918 |
| 1209  | MTUS2     | 1566.237 | 1.29593  | 0.127971 | 10.12675 | 4.20E-24 | 9.24E-23 | 822.8871 | 1046.651 | 851.5752 | 2238.823 | 2055.685 | 2381.801 |
| 20036 | LOC119621 | 4.455737 | 1.295862 | 1.268169 | 1.021837 | 0.306858 | 0.407158 | 3.252518 | 2.189647 | 2.087194 | 2.232127 | 14.97377 | 2.009959 |
| 3515  | LOC119621 | 328.9509 | 1.294765 | 1.294765 | 5.844897 | 5.07E-09 | 3.83E-08 | 181.5989 | 157.6546 | 230.2871 | 524.5498 | 536.9168 | 342.698  |
| 19030 | LOC119618 | 5.277248 | 1.294702 | 1.097802 | 1.179358 | 0.238256 | 0.332841 | 2.168345 | 3.284471 | 3.478657 | 11.16063 | 8.556443 | 3.014938 |
| 4285  | VWA7      | 124.2246 | 1.29429  | 0.250604 | 5.164679 | 2.41E-07 | 1.49E-06 | 73.72375 | 59.12048 | 82.79203 | 180.8023 | 186.1026 | 162.8067 |
| 17656 | LOC119621 | 7.481727 | 1.293247 | 0.926905 | 1.395232 | 0.162946 | 0.245343 | 5.96295  | 3.284471 | 3.478657 | 11.16063 | 14.97377 | 6.029877 |
| 21333 | LOC103241 | 2.791954 | 1.293126 | 1.56347  | 0.827087 | 0.408188 | 0.50868  | 1.626259 | 1.094824 | 2.087194 | 8.928508 | 0        | 3.014938 |
| 1023  | IGF1R     | 2621.11  | 1.292771 | 0.118698 | 10.8913  | 1.27E-27 | 3.30E-26 | 1348.169 | 1738.58  | 1473.559 | 3582.564 | 3632.21  | 3951.579 |
| 8084  | LOC119621 | 52.27038 | 1.292471 | 0.381601 | 3.386971 | 0.000707 | 0.002324 | 39.5723  | 28.46541 | 22.2634  | 71.42806 | 85.56443 | 66.32864 |
| 1089  | VPS18     | 1963.518 | 1.292239 | 0.122484 | 10.5503  | 5.06E-26 | 1.24E-24 | 1145.971 | 1106.319 | 1168.133 | 2763.373 | 2406.5   | 3190.81  |
| 1075  | SLC38A3   | 3514.928 | 1.291588 | 0.121506 | 10.62982 | 2.17E-26 | 5.35E-25 | 1833.878 | 2398.759 | 1884.736 | 4877.197 | 4860.059 | 5234.938 |
| 23065 | LOC103231 | 1.004553 | 1.291436 | 2.341579 | 0.551523 | 0.581275 | 0.669985 | 0.542086 | 0.547412 | 0.695731 | 2.232127 | 0        | 2.009959 |
| 1143  | MGAT3     | 1266.84  | 1.290599 | 0.124772 | 10.34369 | 4.47E-25 | 1.04E-23 | 745.3688 | 696.8552 | 768.0874 | 1649.542 | 1692.037 | 2049.153 |
| 11650 | LOC119621 | 31.31159 | 1.290542 | 0.520169 | 2.481007 | 0.013101 | 0.029897 | 15.17842 | 13.13788 | 25.74206 | 44.64254 | 62.03421 | 27.13445 |
| 2258  | LOC103241 | 2420.148 | 1.290065 | 0.172073 | 7.497203 | 6.52E-14 | 7.68E-13 | 1730.882 | 979.3197 | 1505.563 | 3408.458 | 3270.7   | 3625.966 |
| 1529  | CAMKMT    | 1153.951 | 1.288897 | 0.140763 | 9.156517 | 5.36E-20 | 9.32E-19 | 599.5475 | 808.5272 | 601.8076 | 1620.524 | 1664.228 | 1629.072 |
| 915   | LYST      | 2001.424 | 1.288486 | 0.11292  | 11.41066 | 3.70E-30 | 1.07E-28 | 1103.146 | 1298.461 | 1088.124 | 2776.766 | 2723.088 | 3018.958 |
| 23343 | LOC103241 | 1.003665 | 1.288426 | 2.539884 | 0.507277 | 0.61196  | 0.696952 | 1.084173 | 0        | 0.695731 | 2.232127 | 0        | 2.009959 |
| 4838  | LOC103221 | 106.4792 | 1.288282 | 0.268956 | 4.789927 | 1.67E-06 | 9.17E-06 | 60.71367 | 50.9093  | 74.44326 | 140.624  | 160.4333 | 151.7519 |
| 20155 | LOC103241 | 4.026376 | 1.287945 | 1.284725 | 1.002506 | 0.316099 | 0.416944 | 1.626259 | 1.094824 | 4.174388 | 6.696381 | 8.556443 | 2.009959 |
| 18439 | BPI       | 7.172925 | 1.287874 | 1.023446 | 1.25837  | 0.208258 | 0.300263 | 5.420864 | 5.474118 | 1.391463 | 4.464254 | 19.252   | 7.034856 |
| 5233  | SGCA      | 88.66602 | 1.287621 | 0.282184 | 4.563055 | 5.04E-06 | 2.56E-05 | 58.54533 | 44.88777 | 50.78839 | 138.3919 | 119.7902 | 119.5926 |
| 15722 | LOC119621 | 11.03458 | 1.286773 | 0.750476 | 1.714609 | 0.086417 | 0.146126 | 6.505036 | 4.926706 | 7.653045 | 20.08914 | 14.97377 | 12.05975 |
| 15109 | LOC119618 | 14.19037 | 1.286755 | 0.710099 | 1.812078 | 0.069974 | 0.123129 | 4.878777 | 13.6853  | 6.261582 | 20.08914 | 17.11289 | 23.11453 |
| 18178 | LOC119621 | 6.442086 | 1.28533  | 0.983994 | 1.306238 | 0.191472 | 0.280024 | 5.420864 | 3.831883 | 2.087194 | 6.696381 | 8.556443 | 12.05975 |
| 6455  | LOC119618 | 63.64065 | 1.284576 | 0.324512 | 3.95848  | 7.54E-05 | 0.000311 | 41.19856 | 33.39212 | 36.87376 | 93.74933 | 79.14709 | 97.48301 |
| 4105  | LOC119621 | 141.17   | 1.284189 | 0.24264  | 5.292574 | 1.21E-07 | 7.81E-07 | 72.09749 | 97.4393  | 75.83472 | 207.5878 | 218.1893 | 175.8714 |
| 21498 | ENTPD8    | 3.026793 | 1.283426 | 1.597538 | 0.803378 | 0.421756 | 0.521555 | 0        | 1.094824 | 4.174388 | 4.464254 | 6.417332 | 2.009959 |
| 22395 | LOC119621 | 2.00733  | 1.283017 | 1.94868  | 0.658403 | 0.510279 | 0.60575  | 2.168345 | 0        | 1.391463 | 4.464254 | 0        | 4.019918 |
| 16810 | TERB2     | 10.30012 | 1.282902 | 0.842044 | 1.523556 | 0.12762  | 0.20183  | 5.420864 | 3.284471 | 9.044508 | 15.62489 | 21.39111 | 7.034856 |
| 3406  | SCARF1    | 380.7716 | 1.281643 | 0.215837 | 5.938022 | 2.88E-09 | 2.25E-08 | 271.0432 | 154.3701 | 242.1145 | 508.925  | 494.1346 | 614.0425 |
| 23360 | LOC103231 | 1.00544  | 1.281436 | 2.538897 | 0.504722 | 0.613754 | 0.69843  | 0        | 1.094824 | 0.695731 | 2.232127 | 0        | 2.009959 |
| 23363 | LOC119621 | 1.00544  | 1.281436 | 2.538897 | 0.504722 | 0.613754 | 0.69843  | 0        | 1.094824 | 0.695731 | 2.232127 | 0        | 2.009959 |
| 7     |           |          |          |          |          |          |          |          |          |          |          |          |          |



|       |           |          |          |          |          |          |          |          |          |          |          |          |          |
|-------|-----------|----------|----------|----------|----------|----------|----------|----------|----------|----------|----------|----------|----------|
| 22362 | LOC103231 | 2.244892 | 1.280428 | 1.926515 | 0.664634 | 0.506285 | 0.601883 | 0        | 3.284471 | 0.695731 | 4.464254 | 0        | 5.024897 |
| 1153  | MINDY1    | 696.6741 | 1.28036  | 0.124196 | 10.30915 | 6.41E-25 | 1.48E-23 | 405.4806 | 412.7485 | 402.1327 | 1011.154 | 913.4003 | 1035.129 |
| 19378 | LOC103247 | 5.1866   | 1.27981  | 1.14019  | 1.122453 | 0.26167  | 0.358989 | 3.794605 | 3.831883 | 1.391463 | 2.232127 | 12.83466 | 7.034856 |
| 7469  | LOC103247 | 80.52459 | 1.279444 | 0.358053 | 3.573337 | 0.000352 | 0.001255 | 42.28274 | 68.97389 | 29.22072 | 104.91   | 126.2075 | 111.5527 |
| 20185 | TRNAP-CG  | 3.96265  | 1.279124 | 1.279418 | 0.99977  | 0.317422 | 0.41808  | 3.794605 | 1.642235 | 1.391463 | 2.232127 | 10.69555 | 4.019918 |
| 19831 | GNMT      | 3.979928 | 1.279016 | 1.219487 | 1.048815 | 0.294263 | 0.394483 | 2.710432 | 2.737059 | 1.391463 | 4.464254 | 8.556443 | 4.019918 |
| 20382 | EPST11    | 4.701653 | 1.278903 | 1.326169 | 0.964359 | 0.343866 | 0.436778 | 2.710432 | 3.284471 | 2.087194 | 0        | 17.11289 | 3.014938 |
| 745   | PLCB4     | 3175.082 | 1.278552 | 0.102162 | 12.51493 | 6.19E-36 | 2.21E-34 | 1788.885 | 2032.54  | 1740.72  | 4390.594 | 4372.342 | 4725.413 |
| 506   | LOC103236 | 6867.499 | 1.278197 | 0.088047 | 14.51725 | 9.42E-48 | 4.95E-46 | 4067.816 | 4022.382 | 3942.71  | 9662.878 | 9163.95  | 10345.26 |
| 1425  | HRCT1     | 513.6443 | 1.278166 | 0.135246 | 9.450698 | 3.37E-21 | 6.28E-20 | 318.7468 | 287.9386 | 293.5986 | 707.5843 | 727.2976 | 746.6997 |
| 10961 | ADAMTS5   | 35.26759 | 1.278071 | 0.484695 | 2.636856 | 0.008368 | 0.020295 | 20.0572  | 15.87494 | 25.04633 | 64.73168 | 57.75599 | 28.13943 |
| 5405  | CCDC125   | 91.52142 | 1.277904 | 0.286493 | 4.460512 | 8.18E-06 | 4.02E-05 | 56.37698 | 49.81448 | 52.87558 | 151.7846 | 134.764  | 103.5129 |
| 1697  | STEAP1    | 425.3292 | 1.277583 | 0.146235 | 8.736488 | 2.40E-18 | 3.77E-17 | 241.2284 | 269.3266 | 234.4615 | 613.8349 | 586.1163 | 607.0076 |
| 7122  | TRAF1     | 63.81482 | 1.276843 | 0.346119 | 3.689028 | 0.000225 | 0.00084  | 38.48813 | 36.67659 | 35.4823  | 116.0706 | 89.84265 | 66.32864 |
| 18853 | ASPA      | 5.823942 | 1.276259 | 1.053258 | 1.211726 | 0.225617 | 0.318148 | 3.252518 | 3.284471 | 3.478657 | 15.62489 | 4.278221 | 5.024897 |
| 1160  | ARRDC2    | 1061.598 | 1.275886 | 0.123971 | 10.29184 | 7.67E-25 | 1.76E-23 | 660.8033 | 609.8168 | 594.1546 | 1448.65  | 1381.865 | 1674.296 |
| 3973  | FHDC1     | 158.207  | 1.27586  | 0.236397 | 5.397103 | 6.77E-08 | 4.53E-07 | 99.20181 | 104.5557 | 72.35606 | 220.9806 | 248.1368 | 204.0108 |
| 21808 | LOC119618 | 2.545102 | 1.275678 | 1.681547 | 0.758634 | 0.448072 | 0.546214 | 0        | 1.642235 | 2.782925 | 6.696381 | 2.139111 | 2.009959 |
| 14842 | LOC103240 | 12.98775 | 1.275274 | 0.684418 | 1.863298 | 0.06242  | 0.111807 | 8.673382 | 7.663765 | 6.261582 | 17.85702 | 21.39111 | 16.07967 |
| 20192 | PEBP4     | 4.281913 | 1.274751 | 1.276995 | 0.998242 | 0.318162 | 0.418895 | 1.626259 | 2.189647 | 3.478657 | 6.696381 | 10.69555 | 1.004979 |
| 17936 | B3GAT2    | 6.730344 | 1.274319 | 0.940982 | 1.354244 | 0.175659 | 0.260364 | 3.252518 | 4.379295 | 4.174388 | 6.696381 | 12.83466 | 9.044815 |
| 8141  | LOC119615 | 47.78861 | 1.274095 | 0.378413 | 3.366938 | 0.00076  | 0.002482 | 22.22554 | 32.84471 | 28.52499 | 66.96381 | 74.86887 | 61.30375 |
| 760   | GLB1      | 6104.708 | 1.273589 | 0.102499 | 12.42542 | 1.90E-35 | 6.65E-34 | 3551.75  | 3716.379 | 3453.611 | 8546.814 | 7801.337 | 9558.36  |
| 7565  | TTC16     | 51.13799 | 1.273407 | 0.360027 | 3.536977 | 0.000405 | 0.001422 | 31.9831  | 30.65506 | 27.13352 | 60.26743 | 83.42532 | 73.3635  |
| 24312 | LOC103247 | 0.7344   | 1.272309 | 3.538155 | 0.359597 | 0.719149 | 0.786384 | 0        | 0        | 1.391463 | 0        | 0        | 3.014938 |
| 1182  | PCMTD1    | 1828.433 | 1.272269 | 0.12458  | 10.21245 | 1.74E-24 | 3.92E-23 | 992.0181 | 1253.573 | 966.3709 | 2546.857 | 2562.655 | 2649.126 |
| 620   | ABHD5     | 3181.381 | 1.270974 | 0.094878 | 13.39594 | 6.39E-41 | 2.74E-39 | 1862.067 | 1831.64  | 1902.825 | 4209.791 | 4477.159 | 4804.807 |
| 15058 | LYPD3     | 14.2088  | 1.270764 | 0.696998 | 1.823195 | 0.068274 | 0.120532 | 4.878777 | 12.59047 | 7.653045 | 15.62489 | 21.39111 | 23.11453 |
| 3055  | NEXMIF    | 249.7612 | 1.270511 | 0.200591 | 6.333824 | 2.39E-10 | 2.08E-09 | 126.3061 | 167.508  | 146.7993 | 359.3724 | 301.6146 | 396.9669 |
| 16284 | TAF43     | 13.02805 | 1.270465 | 0.788787 | 1.610657 | 0.107255 | 0.175102 | 2.710432 | 7.663765 | 12.52316 | 13.39276 | 27.80844 | 14.06971 |
| 714   | BDH2      | 3038.947 | 1.269709 | 0.099912 | 12.70832 | 5.32E-37 | 1.98E-35 | 1908.686 | 1632.929 | 1804.727 | 4372.737 | 4134.901 | 4379.701 |
| 17821 | SLC9B1    | 7.016886 | 1.26959  | 0.924368 | 1.373468 | 0.169607 | 0.253016 | 3.252518 | 5.474118 | 3.478657 | 11.16063 | 10.69555 | 8.039836 |
| 6719  | LOC119626 | 62.409   | 1.2681   | 0.32952  | 3.84832  | 0.000119 | 0.00047  | 33.06727 | 33.39212 | 43.83108 | 89.28508 | 83.42532 | 91.45313 |
| 9044  | LOC103235 | 42.73693 | 1.268062 | 0.409065 | 3.099905 | 0.001936 | 0.00569  | 18.97302 | 27.918   | 27.82925 | 71.42806 | 62.03421 | 48.23901 |
| 23414 | LOC119625 | 0.988162 | 1.268029 | 2.551365 | 0.497    | 0.619189 | 0.703056 | 1.084173 | 0        | 0.695731 | 0        | 2.139111 | 2.009959 |
| 20245 | ZNF534    | 4.323971 | 1.268019 | 1.282948 | 0.988363 | 0.322975 | 0.42412  | 1.626259 | 4.379295 | 1.391463 | 13.39276 | 2.139111 | 3.014938 |
| 12279 | LOC103226 | 24.22395 | 1.267844 | 0.539613 | 2.349542 | 0.018797 | 0.040696 | 10.29964 | 16.96977 | 15.30609 | 24.5534  | 47.06043 | 31.15436 |
| 1552  | ZNRF2     | 1219.041 | 1.267085 | 0.139579 | 9.077917 | 1.11E-19 | 1.90E-18 | 654.2982 | 859.984  | 631.0284 | 1741.059 | 1762.627 | 1665.251 |
| 19561 | LOC119628 | 4.258245 | 1.266982 | 1.163005 | 1.089404 | 0.275976 | 0.375025 | 2.168345 | 3.284471 | 2.087194 | 6.696381 | 4.278221 | 7.034856 |
| 975   | DOCK4     | 1663.363 | 1.266956 | 0.113955 | 1.111801 | 1.03E-28 | 2.80E-27 | 910.163  | 1093.181 | 927.4099 | 2314.716 | 2284.57  | 2450.14  |
| 17565 | LOC119620 | 7.526552 | 1.266622 | 0.901456 | 1.405084 | 0.159996 | 0.242168 | 4.336691 | 5.474118 | 3.478657 | 13.39276 | 6.417332 | 12.05975 |
| 1510  | KLHDC7A   | 783.0749 | 1.266535 | 0.13724  | 9.228585 | 2.74E-20 | 4.83E-19 | 507.3928 | 453.8044 | 420.2217 | 1093.742 | 1003.243 | 1220.045 |
| 12491 | LOC119625 | 42.45194 | 1.266274 | 0.549838 | 2.302995 | 0.021279 | 0.045289 | 27.6464  | 9.306001 | 37.56949 | 46.87467 | 94.12087 | 39.1942  |
| 10572 | LOC103230 | 30.28295 | 1.266048 | 0.464028 | 2.728388 | 0.006364 | 0.016003 | 14.09425 | 21.89647 | 17.39328 | 40.17829 | 44.92132 | 43.21412 |
| 16523 | AVPR2     | 15.73622 | 1.265472 | 0.805583 | 1.570877 | 0.116211 | 0.18698  | 8.673382 | 2.737059 | 16.00182 | 29.01765 | 29.94755 | 8.039836 |
| 19202 | PNPLA1    | 10.19565 | 1.2653   | 1.097753 | 1.152627 | 0.249064 | 0.344826 | 0        | 6.02153  | 11.82743 | 22.32127 | 14.97377 | 6.029877 |
| 22093 | LOC103247 | 1.978987 | 1.264104 | 1.778574 | 0.71074  | 0.477245 | 0.57428  | 0.542086 | 1.642235 | 1.391463 | 0        | 4.278221 | 4.019918 |
| 2105  | GPAA1     | 4992.773 | 1.263762 | 0.162157 | 7.793468 | 6.52E-15 | 8.23E-14 | 3349.552 | 2152.423 | 3308.898 | 6872.719 | 6214.116 | 8058.93  |
| 9522  | DHRS3     | 36.58158 | 1.262856 | 0.423955 | 2.978754 | 0.002894 | 0.008081 | 19.51511 | 22.44388 | 22.2634  | 46.87467 | 64.17332 | 44.2191  |
| 13303 | LOC119625 | 20.90915 | 1.262311 | 0.588225 | 2.145967 | 0.031876 | 0.063701 | 12.46799 | 9.306001 | 14.61036 | 33.4819  | 38.50399 | 17.08465 |
| 4409  | GPT       | 185.6804 | 1.261399 | 0.248665 | 5.072689 | 3.92E-07 | 2.36E-06 | 129.0166 | 74.44801 | 125.2316 | 254.4625 | 254.5542 | 276.3694 |
| 1672  | HLX       | 434.424  | 1.261298 | 0.143468 | 8.79147  | 1.48E-18 | 2.35E-17 | 250.986  | 259.4732 | 258.1163 | 622.7634 | 569.0034 | 646.2018 |
| 14965 | LOC103230 | 15.01315 | 1.259944 | 0.684356 | 1.841064 | 0.065612 | 0.116559 | 10.84173 | 7.663765 | 7.653045 | 15.62489 | 34.22577 | 14.06971 |
| 14187 | GP5       | 16.08196 | 1.259088 | 0.636162 | 1.979193 | 0.047794 | 0.089562 | 10.29964 | 6.568942 | 11.82743 | 24.5534  | 17.11289 | 26.12947 |
| 20864 | LOC119625 | 3.030213 | 1.259026 | 1.404865 | 0.89619  | 0.370151 | 0.471648 | 2.710432 | 1.094824 | 1.391463 | 6.696381 | 4.278221 | 2.009959 |
| 1782  | CCDC9B    | 610.3947 | 1.258991 | 0.148076 | 8.502345 | 1.86E-17 | 2.77E-16 | 376.2079 | 386.4727 | 318.645  | 805.7978 | 806.4447 | 968.8002 |
| 20133 | LOC119625 | 4.224932 | 1.258449 | 1.250071 | 1.006702 | 0.314078 | 0.41473  | 1.626259 | 4.379295 | 1.391463 | 2.232127 | 10.69555 | 5.024897 |
| 12393 | LOC119625 | 23.21762 | 1.25843  | 0.541865 | 2.322403 | 0.020211 | 0.043356 | 12.46799 | 14.78012 | 13.2189  | 44.64254 | 32.08666 | 22.10955 |
| 1193  | GSN       | 14232.01 | 1.257489 | 0.123707 | 10.16509 | 2.84E-24 | 6.33E-23 | 9308.165 | 7248.28  | 8631.243 | 19794.5  | 17754.62 | 22655.25 |
| 14954 | LOC103225 | 17.56158 | 1.257213 | 0.681622 | 1.844442 | 0.065119 | 0.115763 | 7.589209 | 10.40082 | 12.52316 | 42.41041 | 21.39111 | 11.05477 |
| 12812 | BMP7      | 25.27514 | 1.25704  | 0.56214  | 2.236168 | 0.025341 | 0.052582 | 16.80468 | 15.87494 | 11.1317  | 49.10679 | 40.6431  | 18.08963 |
| 16615 | NLGN3     | 12.80506 | 1.256883 | 0.80788  | 1.555778 | 0.119761 | 0.191625 | 8.131296 | 3.831883 | 10.43597 | 11.16063 | 34.22577 | 9.044815 |
| 15838 | LOC103225 | 12.87204 | 1.256719 | 0.742527 | 1.692489 | 0.090553 | 0.151982 | 7.047123 | 4.379295 | 11.1317  | 20.08914 | 23.53022 | 11.05477 |
| 3698  | LOC103247 | 139.3512 | 1.256653 | 0.222702 | 5.642746 | 1.67E-08 | 1.20E-07 | 80.77087 | 79.37471 | 86.96642 | 200.8914 | 186.1026 | 202.0009 |
| 19210 | LOC119628 | 7.089638 | 1.256612 | 1.091068 | 1.151726 | 0.249434 | 0.345195 | 4.878777 | 0.547412 | 6.957314 | 11.16063 | 14.97377 | 4.019918 |
| 1822  | CAMK2N1   | 1563.206 | 1.256226 | 0.149715 | 8.390779 | 4.83E-17 | 7.05E-16 | 780.0623 | 1148.47  | 837.6606 | 2200.877 | 2318.796 | 2093.372 |
| 23373 | LOC103220 | 1.507769 | 1.25616  | 2.500519 | 0.50236  | 0.615415 | 0.699874 | 0.542086 | 0        | 2.087194 | 0        | 6.417332 | 0        |
| 945   | GSTK1     | 2998.957 | 1.255825 | 0.111816 | 11.23118 | 2.87E-29 | 8.06E-28 | 1878.871 | 1543.701 | 1890.998 | 4207.559 | 4038.641 | 4433.969 |
| 3847  | GCHFR     | 219.3102 | 1.255823 | 0.228354 | 5.499455 | 3.81E-08 | 2.63E-07 | 139.8583 | 94.70224 | 155.1481 | 310.2657 | 280.2235 | 335.6631 |
| 15172 | LOC103247 | 14.22161 | 1.255811 | 0.696969 | 1.801819 | 0.071574 | 0.125415 | 9.215468 | 10.94824 | 4.87012  | 13.39276 | 27.80844 | 19.09461 |
| 880   |           |          |          |          |          |          |          |          |          |          |          |          |          |



|       |           |          |          |          |          |          |          |          |          |          |          |          |          |
|-------|-----------|----------|----------|----------|----------|----------|----------|----------|----------|----------|----------|----------|----------|
| 20860 | LOC119623 | 3.971867 | 1.254347 | 1.398844 | 0.896703 | 0.369878 | 0.47139  | 3.794605 | 1.094824 | 2.087194 | 0        | 12.83466 | 4.019918 |
| 18270 | LOC119620 | 7.273121 | 1.254028 | 0.972345 | 1.289694 | 0.197157 | 0.2869   | 6.505036 | 3.284471 | 2.782925 | 8.928508 | 17.11289 | 5.024897 |
| 9015  | CCDC178   | 52.22251 | 1.253615 | 0.402899 | 3.111484 | 0.001861 | 0.00549  | 39.5723  | 33.39212 | 19.48048 | 55.80317 | 87.70354 | 77.38342 |
| 21327 | LOC119626 | 3.267585 | 1.253589 | 1.513886 | 0.82806  | 0.407636 | 0.508134 | 4.336691 | 0.547412 | 0.695731 | 4.464254 | 8.556443 | 1.004979 |
| 23384 | LRRC72    | 1.508656 | 1.253543 | 2.500272 | 0.501362 | 0.616116 | 0.700455 | 0        | 0.547412 | 2.087194 | 0        | 6.417332 | 0        |
| 1878  | GLI4      | 1314.364 | 1.253469 | 0.152226 | 8.23427  | 1.81E-16 | 2.56E-15 | 887.9375 | 622.4072 | 823.0502 | 1756.684 | 1702.732 | 2093.372 |
| 20336 | RASSF9    | 4.306633 | 1.253269 | 1.29031  | 0.971293 | 0.331402 | 0.433238 | 1.626259 | 1.642235 | 4.174388 | 6.696381 | 10.69555 | 1.004979 |
| 8250  | FAM187A   | 49.8252  | 1.253235 | 0.376301 | 3.330409 | 0.000867 | 0.002794 | 22.22554 | 34.48694 | 31.30791 | 75.89232 | 72.72976 | 62.30873 |
| 15572 | LOC119624 | 12.27268 | 1.253097 | 0.723063 | 1.73304  | 0.083088 | 0.141851 | 8.131296 | 7.116354 | 6.261582 | 13.39276 | 25.66933 | 13.06473 |
| 13628 | RTN4RL1   | 18.03188 | 1.252621 | 0.60127  | 2.083292 | 0.037225 | 0.072616 | 11.38381 | 8.211177 | 12.52316 | 17.85702 | 32.08666 | 26.12947 |
| 17290 | LOC119618 | 9.089098 | 1.252258 | 0.86339  | 1.450396 | 0.146948 | 0.225946 | 4.336691 | 2.737059 | 9.044508 | 13.39276 | 14.97377 | 10.04979 |
| 14579 | LOC119621 | 14.29514 | 1.252176 | 0.655618 | 1.909916 | 0.056144 | 0.102379 | 9.757555 | 9.306001 | 6.261582 | 20.08914 | 19.252   | 21.10457 |
| 13382 | GIPR      | 20.10741 | 1.252091 | 0.587675 | 2.130584 | 0.033123 | 0.065804 | 15.17842 | 7.116354 | 13.2189  | 26.78552 | 34.22577 | 24.11951 |
| 4624  | RAB3A     | 109.2025 | 1.252077 | 0.253824 | 4.932853 | 8.10E-07 | 4.66E-06 | 62.88202 | 71.16354 | 59.13717 | 147.3204 | 168.9897 | 145.722  |
| 11755 | PDGFRL    | 27.18344 | 1.251424 | 0.509154 | 2.45785  | 0.013977 | 0.031611 | 20.59928 | 13.13788 | 14.61036 | 46.87467 | 25.66933 | 42.20914 |
| 3878  | ZNF707    | 137.9562 | 1.251283 | 0.228755 | 5.469976 | 4.50E-08 | 3.09E-07 | 86.19173 | 72.25836 | 86.27069 | 189.7308 | 205.3546 | 187.9312 |
| 16409 | AKAIN1    | 11.36799 | 1.251035 | 0.788301 | 1.587001 | 0.112512 | 0.182287 | 5.96295  | 5.474118 | 8.348776 | 17.85702 | 23.53022 | 7.034856 |
| 18072 | LOC119623 | 6.765229 | 1.250516 | 0.940964 | 1.328973 | 0.183857 | 0.270465 | 3.794605 | 5.474118 | 2.782925 | 8.928508 | 8.556443 | 11.05477 |
| 17858 | LOC103224 | 7.513877 | 1.250493 | 0.914149 | 1.367931 | 0.171334 | 0.255048 | 4.336691 | 6.02153  | 2.782925 | 8.928508 | 14.97377 | 8.039836 |
| 3814  | PLXNB3    | 196.4731 | 1.250122 | 0.226119 | 5.528591 | 3.23E-08 | 2.25E-07 | 128.4745 | 87.03848 | 134.2762 | 270.0874 | 269.5279 | 289.4341 |
| 19000 | LOC119625 | 5.798959 | 1.249981 | 1.055064 | 1.184744 | 0.236119 | 0.33038  | 3.252518 | 3.284471 | 3.478657 | 8.928508 | 12.83466 | 3.014938 |
| 15720 | LOC119621 | 17.74159 | 1.249875 | 0.7288   | 1.714976 | 0.08635  | 0.146031 | 6.505036 | 18.06459 | 6.261582 | 33.4819  | 32.08666 | 10.04979 |
| 14670 | LOC103219 | 13.84351 | 1.249674 | 0.659894 | 1.893749 | 0.058258 | 0.105576 | 9.215468 | 7.663765 | 7.653045 | 22.32127 | 17.11289 | 19.09461 |
| 15674 | LSMEM1    | 24.27882 | 1.248985 | 0.725363 | 1.721876 | 0.085092 | 0.144317 | 4.336691 | 9.306001 | 11.82743 | 11.16063 | 29.94755 | 19.09461 |
| 15511 | LOC103221 | 18.93921 | 1.248303 | 0.716679 | 1.741788 | 0.081546 | 0.139765 | 7.047123 | 20.25424 | 6.261582 | 11.16063 | 42.78221 | 26.12947 |
| 2670  | LOC103222 | 253.8413 | 1.24803  | 0.181506 | 6.87596  | 6.16E-12 | 6.13E-11 | 138.7741 | 164.2235 | 149.5822 | 339.2833 | 342.2577 | 388.9271 |
| 23767 | LOC119619 | 1.040693 | 1.247835 | 2.818556 | 0.442721 | 0.657967 | 0.735981 | 1.084173 | 0        | 0.695731 | 4.464254 | 0        | 0        |
| 20590 | TRNAD-GU  | 3.524732 | 1.247413 | 1.328628 | 0.938873 | 0.347796 | 0.449061 | 1.626259 | 3.831883 | 0.695731 | 6.696381 | 4.278221 | 4.019918 |
| 1971  | CORO2A    | 416.0934 | 1.246878 | 0.154978 | 8.045508 | 8.59E-16 | 1.16E-14 | 258.5752 | 237.5767 | 246.2889 | 573.6566 | 526.2212 | 654.2416 |
| 809   | DNAH5     | 2742.242 | 1.246755 | 0.103664 | 12.0269  | 2.57E-33 | 8.43E-32 | 1568.256 | 1771.425 | 1540.349 | 3778.991 | 3692.105 | 4102.326 |
| 2731  | PLA2G15   | 871.2331 | 1.246701 | 0.183232 | 6.803959 | 1.02E-11 | 9.91E-11 | 608.2209 | 370.5978 | 573.2826 | 1167.402 | 1123.033 | 1384.862 |
| 20136 | LPO       | 4.309827 | 1.24667  | 1.239214 | 1.006016 | 0.314408 | 0.415104 | 1.626259 | 1.094824 | 4.87012  | 6.696381 | 8.556443 | 3.014938 |
| 4066  | ARSI      | 154.3275 | 1.246345 | 0.234219 | 5.321283 | 1.03E-07 | 6.74E-07 | 105.1648 | 74.99542 | 95.3152  | 216.5163 | 196.7982 | 237.1752 |
| 1453  | LOC103233 | 632.5845 | 1.246048 | 0.133146 | 9.358513 | 8.09E-21 | 1.48E-19 | 343.1407 | 401.8003 | 380.5651 | 850.4404 | 941.2087 | 878.3521 |
| 7914  | LOC103233 | 52.88637 | 1.245764 | 0.362742 | 3.434297 | 0.000594 | 0.001996 | 34.15144 | 29.01283 | 31.30791 | 84.82083 | 55.61688 | 82.40832 |
| 16840 | LOC119623 | 11.91749 | 1.245458 | 0.820516 | 1.517896 | 0.129041 | 0.203714 | 2.710432 | 5.474118 | 13.2189  | 22.32127 | 10.69555 | 17.08465 |
| 3356  | VNN2      | 198.6095 | 1.244764 | 0.20795  | 5.985879 | 2.15E-09 | 1.70E-08 | 100.286  | 128.0944 | 125.2316 | 310.2657 | 252.4151 | 275.3644 |
| 22794 | LOC119628 | 1.813896 | 1.244532 | 2.096286 | 0.593684 | 0.552724 | 0.64465  | 0        | 1.094824 | 2.087194 | 6.696381 | 0        | 1.004979 |
| 4024  | ZNF703    | 146.9732 | 1.244416 | 0.232399 | 5.354645 | 8.57E-08 | 5.66E-07 | 86.73382 | 94.15483 | 81.40057 | 225.4448 | 168.9897 | 225.1154 |
| 599   | HEXB      | 3044.271 | 1.244081 | 0.091436 | 13.60596 | 3.69E-42 | 1.64E-40 | 1867.488 | 1798.248 | 1758.809 | 4203.095 | 4147.736 | 4490.248 |
| 17872 | LOC119621 | 9.433673 | 1.24408  | 0.91101  | 1.365604 | 0.172063 | 0.255948 | 4.878777 | 2.189647 | 9.740239 | 22.32127 | 6.417332 | 11.05477 |
| 3312  | CEBPA     | 501.0202 | 1.243816 | 0.20625  | 6.030636 | 1.63E-09 | 1.31E-08 | 369.1608 | 208.5639 | 316.5578 | 660.7096 | 648.1505 | 802.9786 |
| 19535 | LOC103211 | 5.016643 | 1.24331  | 1.135391 | 1.09505  | 0.273495 | 0.372196 | 4.336691 | 1.094824 | 3.478657 | 4.464254 | 10.69555 | 6.029877 |
| 9447  | LOC103241 | 42.5627  | 1.242881 | 0.414534 | 2.998261 | 0.002715 | 0.007641 | 23.8518  | 23.53871 | 27.82925 | 82.5887  | 51.33866 | 46.22906 |
| 15612 | GABRG2    | 11.8321  | 1.242815 | 0.719418 | 1.727528 | 0.084073 | 0.143097 | 7.589209 | 7.663765 | 5.565851 | 17.85702 | 19.252   | 13.06473 |
| 14102 | LIPC      | 16.88909 | 1.241805 | 0.622892 | 1.993612 | 0.046194 | 0.087085 | 7.047123 | 10.40082 | 12.52316 | 22.32127 | 29.94755 | 19.09461 |
| 22523 | LOC119623 | 1.813009 | 1.24134  | 1.949258 | 0.636827 | 0.524237 | 0.618783 | 0.542086 | 0.547412 | 2.087194 | 6.696381 | 0        | 1.004979 |
| 828   | SESTD1    | 4662.548 | 1.241333 | 0.1044   | 11.89021 | 1.33E-32 | 4.27E-31 | 2663.27  | 3095.066 | 2558.204 | 6256.652 | 6586.322 | 6815.771 |
| 15677 | ACER1     | 14.70495 | 1.241323 | 0.721066 | 1.72151  | 0.085158 | 0.144411 | 7.589209 | 7.663765 | 10.43597 | 24.5534  | 29.94755 | 8.039836 |
| 10747 | UNPR2     | 34.84605 | 1.240075 | 0.462624 | 2.680523 | 0.007351 | 0.018184 | 22.22554 | 22.9913  | 16.00182 | 55.80317 | 59.8951  | 32.15934 |
| 3123  | MFSO12    | 715.0905 | 1.239908 | 0.198357 | 6.250897 | 4.08E-10 | 3.47E-09 | 488.4198 | 292.8653 | 497.4479 | 935.2612 | 919.8176 | 1156.731 |
| 20066 | LGI1      | 4.043983 | 1.239871 | 1.217787 | 1.018134 | 0.308614 | 0.408876 | 3.252518 | 1.094824 | 2.782925 | 6.696381 | 6.417332 | 4.019918 |
| 5497  | UNC13A    | 130.9788 | 1.239495 | 0.280992 | 4.411146 | 1.03E-05 | 4.97E-05 | 65.05036 | 77.18507 | 90.44508 | 169.6417 | 243.8586 | 139.6921 |
| 1325  | LOC103216 | 1985.765 | 1.239304 | 0.126735 | 9.77867  | 1.39E-22 | 2.79E-21 | 1090.678 | 1381.667 | 1074.209 | 2687.481 | 2686.723 | 2993.834 |
| 24065 | HBE1      | 0.771428 | 1.239039 | 3.138343 | 0.394807 | 0.692986 | 0.765584 | 0        | 0        | 1.391463 | 2.232127 | 0        | 1.004979 |
| 24066 | PRL       | 0.771428 | 1.239039 | 3.138343 | 0.394807 | 0.692986 | 0.765584 | 0        | 0        | 1.391463 | 2.232127 | 0        | 1.004979 |
| 17978 | GSC       | 8.140852 | 1.238683 | 0.919735 | 1.346782 | 0.17805  | 0.263292 | 4.336691 | 4.926706 | 4.87012  | 17.85702 | 12.83466 | 4.019918 |
| 22339 | CARD11    | 3.073038 | 1.238673 | 1.853149 | 0.668415 | 0.503869 | 0.599613 | 0        | 0.547412 | 4.87012  | 4.464254 | 8.556443 | 0        |
| 24088 | FTHL17    | 0.755925 | 1.238468 | 3.158644 | 0.392088 | 0.694993 | 0.767005 | 0        | 0        | 1.391463 | 0        | 2.139111 | 1.004979 |
| 24089 | LOC103231 | 0.755925 | 1.238468 | 3.158644 | 0.392088 | 0.694993 | 0.767005 | 0        | 0        | 1.391463 | 0        | 2.139111 | 1.004979 |
| 14903 | LOC119626 | 16.69345 | 1.238315 | 0.667846 | 1.854193 | 0.063712 | 0.113653 | 11.9259  | 10.94824 | 6.261582 | 29.01765 | 29.94755 | 12.05975 |
| 12370 | LOC103241 | 24.20242 | 1.238091 | 0.531831 | 2.327979 | 0.019913 | 0.042796 | 10.84173 | 18.06459 | 13.91463 | 33.4819  | 42.78221 | 26.12947 |
| 22564 | LOC119618 | 2.298782 | 1.238053 | 1.963118 | 0.630656 | 0.528265 | 0.622404 | 0        | 0        | 4.174388 | 4.464254 | 2.139111 | 3.014938 |
| 20855 | PRIMA1    | 3.522896 | 1.237985 | 1.379023 | 0.897726 | 0.369332 | 0.470807 | 1.626259 | 1.094824 | 3.478657 | 2.232127 | 10.69555 | 2.009959 |
| 23291 | LOC119628 | 1.260977 | 1.237958 | 2.402656 | 0.515246 | 0.606381 | 0.692141 | 0        | 2.189647 | 0        | 2.232127 | 2.139111 | 1.004979 |
| 16894 | LOC119629 | 9.757264 | 1.237261 | 0.820847 | 1.507298 | 0.131734 | 0.207289 | 7.047123 | 5.474118 | 4.87012  | 6.696381 | 21.39111 | 13.06473 |
| 7365  | LOC103222 | 55.88592 | 1.236741 | 0.342471 | 3.611228 | 0.000305 | 0.0011   | 34.15144 | 33.39212 | 32.00364 | 71.42806 | 91.98176 | 72.35852 |
| 1703  | MLLT11    | 3682.367 | 1.236703 | 0.141877 | 8.71671  | 2.86E-18 | 4.47E-17 | 1909.77  | 2750.744 | 1921.61  | 5205.32  | 4988.406 | 5318.351 |
| 1547  | BCL6      | 1813.436 | 1.236502 | 0.135977 | 9.093447 | 9.59E-20 | 1.65E-18 | 984.4288 | 1302.84  | 955.2392 | 2464.268 | 2483.507 | 2690.33  |
| 19443 | LOC119627 | 4.757543 | 1.236411 | 1.113262 | 1.11062  | 0.266732 | 0.36471  | 3.794605 | 2.737059 | 2.087194 | 4.464254 | 6.417332 | 9.044815 |
| 21871 | LOC119627 | 3.111014 | 1.236023 | 1.64957  |          |          |          |          |          |          |          |          |          |



|       |           |          |          |          |          |          |          |          |          |          |          |          |          |
|-------|-----------|----------|----------|----------|----------|----------|----------|----------|----------|----------|----------|----------|----------|
| 8875  | KCNMB1    | 45.51686 | 1.235223 | 0.392219 | 3.149324 | 0.001636 | 0.004902 | 33.06727 | 27.918   | 20.17621 | 58.0353  | 70.59065 | 63.31371 |
| 16976 | LOC119627 | 9.320245 | 1.235179 | 0.825525 | 1.496234 | 0.134593 | 0.210764 | 7.047123 | 3.284471 | 6.261582 | 11.16063 | 17.11289 | 11.05477 |
| 18432 | LOC103248 | 7.557816 | 1.23516  | 0.980558 | 1.25965  | 0.207796 | 0.29971  | 3.794605 | 6.568942 | 2.782925 | 8.928508 | 19.252   | 4.019918 |
| 21714 | LOC119628 | 2.740996 | 1.234777 | 1.591487 | 0.775864 | 0.437829 | 0.536031 | 1.626259 | 3.284471 | 0        | 2.232127 | 4.278221 | 5.024897 |
| 10761 | OXER1     | 31.6251  | 1.2346   | 0.461128 | 2.677346 | 0.007421 | 0.018333 | 22.22554 | 19.15941 | 15.30609 | 33.4819  | 51.33866 | 48.23901 |
| 20595 | LOC119625 | 4.232374 | 1.234565 | 1.31536  | 0.938576 | 0.347949 | 0.449149 | 2.710432 | 2.737059 | 2.087194 | 0        | 12.83466 | 5.024897 |
| 11602 | LOC119624 | 33.43404 | 1.234154 | 0.49475  | 2.494499 | 0.012614 | 0.028903 | 18.43094 | 16.96977 | 23.65487 | 49.10679 | 66.31243 | 26.12947 |
| 3554  | ITGB6     | 208.5345 | 1.23273  | 0.21248  | 5.80163  | 6.57E-09 | 4.91E-08 | 131.727  | 129.7366 | 112.7085 | 229.9091 | 331.5622 | 315.5636 |
| 1801  | GUCY1A2   | 483.1909 | 1.232726 | 0.145957 | 8.445802 | 3.02E-17 | 4.46E-16 | 288.3899 | 281.3697 | 295.6858 | 607.1385 | 757.2452 | 669.3163 |
| 10952 | LOC119627 | 38.68463 | 1.232636 | 0.467073 | 2.639064 | 0.008314 | 0.02018  | 18.97302 | 22.44388 | 27.13352 | 49.10679 | 81.28621 | 33.16432 |
| 2763  | VDR       | 284.5438 | 1.232451 | 0.182493 | 6.753422 | 1.44E-11 | 1.39E-10 | 182.6831 | 176.2666 | 152.3652 | 372.7652 | 367.927  | 455.2557 |
| 13084 | LOC103244 | 29.1854  | 1.23219  | 0.562516 | 2.190496 | 0.028488 | 0.057885 | 8.673382 | 20.80165 | 22.2634  | 44.64254 | 55.61688 | 23.11453 |
| 13428 | LOC119618 | 20.269   | 1.232166 | 0.580799 | 2.121502 | 0.03388  | 0.067075 | 8.131296 | 15.32753 | 12.52316 | 35.71403 | 27.80844 | 22.10955 |
| 15066 | RAB44     | 13.92625 | 1.231947 | 0.676111 | 1.822108 | 0.068439 | 0.120765 | 7.589209 | 9.306001 | 7.653045 | 24.5534  | 21.39111 | 13.06473 |
| 18319 | LAPTM5    | 8.416672 | 1.23158  | 0.962577 | 1.279461 | 0.200735 | 0.291311 | 7.047123 | 2.737059 | 4.87012  | 17.85702 | 14.97377 | 3.014938 |
| 13887 | LOC103237 | 19.91317 | 1.231566 | 0.605848 | 2.032798 | 0.042073 | 0.080544 | 8.673382 | 14.78012 | 11.82743 | 22.32127 | 42.78221 | 19.09461 |
| 15015 | GALR3     | 18.80122 | 1.231528 | 0.672626 | 1.830926 | 0.067112 | 0.118831 | 13.01007 | 4.379295 | 16.00182 | 31.24978 | 32.08666 | 16.07967 |
| 2085  | ABTB1     | 499.2303 | 1.2314   | 0.157444 | 7.821204 | 5.23E-15 | 6.67E-14 | 314.9522 | 258.3784 | 323.5151 | 714.2806 | 622.4812 | 761.7744 |
| 12426 | LOC103238 | 33.00344 | 1.230721 | 0.53138  | 2.316085 | 0.020554 | 0.043974 | 11.9259  | 29.01283 | 17.39328 | 55.80317 | 57.75599 | 26.12947 |
| 1588  | MMP14     | 656.2931 | 1.230632 | 0.136709 | 9.001813 | 2.22E-19 | 3.72E-18 | 363.74   | 441.2139 | 372.2163 | 877.2259 | 932.6523 | 950.7106 |
| 15483 | LOC119615 | 12.3682  | 1.230601 | 0.70405  | 1.747889 | 0.080483 | 0.138193 | 6.505036 | 6.568942 | 9.044508 | 15.62489 | 21.39111 | 15.07469 |
| 1488  | MPP6      | 813.7783 | 1.230495 | 0.132566 | 9.282145 | 1.66E-20 | 2.97E-19 | 462.3997 | 550.1489 | 447.3553 | 1084.814 | 1138.007 | 1199.945 |
| 16431 | LOC119627 | 10.59613 | 1.230325 | 0.776719 | 1.584003 | 0.113193 | 0.183144 | 3.794605 | 7.116354 | 8.348776 | 13.39276 | 12.83466 | 18.08963 |
| 12665 | TAT       | 22.7942  | 1.230085 | 0.542518 | 2.267361 | 0.023368 | 0.049052 | 16.80468 | 12.04306 | 11.82743 | 42.41041 | 23.53022 | 30.14938 |
| 19826 | LOC119620 | 6.031821 | 1.229574 | 1.170471 | 1.050495 | 0.293491 | 0.393546 | 3.794605 | 3.284471 | 3.478657 | 2.232127 | 21.39111 | 2.009959 |
| 16830 | LOC103224 | 12.68473 | 1.229432 | 0.809176 | 1.519363 | 0.128671 | 0.203251 | 4.878777 | 3.831883 | 13.91463 | 15.62489 | 27.80844 | 10.04979 |
| 22224 | LOC119618 | 3.054707 | 1.229373 | 1.787253 | 0.687856 | 0.491543 | 0.587999 | 0        | 0        | 5.565851 | 4.464254 | 4.278221 | 4.019918 |
| 1000  | JADE2     | 1500.758 | 1.228656 | 0.111846 | 10.9852  | 4.50E-28 | 1.20E-26 | 919.3785 | 896.1131 | 880.7959 | 2120.521 | 1897.391 | 2290.348 |
| 21875 | LOC103222 | 2.821809 | 1.228643 | 1.641093 | 0.748673 | 0.454054 | 0.551819 | 2.168345 | 0        | 2.782925 | 6.696381 | 4.278221 | 1.004979 |
| 18061 | HEPACAM   | 7.558348 | 1.228267 | 0.9222   | 1.331888 | 0.182897 | 0.269216 | 5.420864 | 4.379295 | 3.478657 | 8.928508 | 17.11289 | 6.029877 |
| 12497 | LOC119627 | 40.77794 | 1.227963 | 0.533334 | 2.302427 | 0.021311 | 0.045336 | 18.97302 | 30.10765 | 22.95914 | 66.96381 | 85.56443 | 20.09959 |
| 19436 | LOC103235 | 5.61511  | 1.227639 | 1.104041 | 1.11195  | 0.26616  | 0.364059 | 1.084173 | 2.737059 | 6.261582 | 11.16063 | 6.417332 | 6.029877 |
| 22260 | LOC119627 | 3.148574 | 1.22739  | 1.800348 | 0.681752 | 0.495396 | 0.591649 | 2.168345 | 0.547412 | 2.782925 | 13.39276 | 0        | 0        |
| 23279 | LOC119627 | 1.242812 | 1.22717  | 2.37418  | 0.516882 | 0.605239 | 0.691193 | 1.626259 | 0.547412 | 0        | 0        | 4.278221 | 1.004979 |
| 1149  | PLXNB1    | 1187.199 | 1.227136 | 0.118909 | 10.31993 | 5.73E-25 | 1.32E-23 | 705.2544 | 694.1182 | 736.7795 | 1631.685 | 1510.212 | 1845.142 |
| 1419  | LOC103224 | 674.0642 | 1.226315 | 0.12948  | 9.47111  | 2.77E-21 | 5.19E-20 | 416.8644 | 387.0202 | 409.7858 | 874.9938 | 932.6523 | 1023.069 |
| 14484 | REPS2     | 24.13293 | 1.226256 | 0.636007 | 1.928053 | 0.053849 | 0.098838 | 14.63633 | 9.306001 | 18.78475 | 31.24978 | 57.75599 | 13.06473 |
| 1013  | SLC17A5   | 1188.711 | 1.226171 | 0.112163 | 10.93207 | 8.10E-28 | 2.13E-26 | 738.8637 | 734.0792 | 664.4235 | 1593.739 | 1636.42  | 1764.744 |
| 18443 | LOC103218 | 6.834749 | 1.225476 | 0.974219 | 1.257906 | 0.208426 | 0.300439 | 3.794605 | 2.737059 | 5.565851 | 8.928508 | 14.97377 | 5.024897 |
| 1912  | CACNA1H   | 466.12   | 1.224857 | 0.149885 | 8.172003 | 3.03E-16 | 4.22E-15 | 300.8579 | 251.8094 | 285.2499 | 705.3521 | 603.2292 | 650.2217 |
| 17041 | LOC103230 | 11.09036 | 1.224799 | 0.823528 | 1.487258 | 0.136947 | 0.213645 | 5.96295  | 8.758589 | 5.565851 | 17.85702 | 4.278221 | 24.11951 |
| 1052  | TNFRSF10A | 1374.483 | 1.223643 | 0.113756 | 10.75676 | 5.51E-27 | 1.39E-25 | 887.3954 | 807.4324 | 779.9149 | 1901.772 | 1801.131 | 2069.253 |
| 2916  | EFHB      | 378.1965 | 1.223159 | 0.187339 | 6.529104 | 6.62E-11 | 6.03E-10 | 189.7302 | 279.7274 | 210.1109 | 584.8173 | 496.2737 | 508.5196 |
| 5258  | SPAAR     | 97.58341 | 1.22306  | 0.268889 | 4.548574 | 5.40E-06 | 2.73E-05 | 62.33993 | 49.81448 | 63.31155 | 133.9276 | 145.4595 | 130.6473 |
| 18428 | LOC119625 | 6.875425 | 1.222522 | 0.969965 | 1.260377 | 0.207533 | 0.299396 | 4.336691 | 4.926706 | 2.782925 | 15.62489 | 8.556443 | 5.024897 |
| 4810  | SNCG      | 127.536  | 1.221642 | 0.254128 | 4.807199 | 1.53E-06 | 8.46E-06 | 86.19173 | 60.76271 | 82.0963  | 178.5702 | 196.7982 | 160.7967 |
| 13399 | LOC103234 | 26.97411 | 1.221374 | 0.574069 | 2.127575 | 0.033372 | 0.066214 | 24.39389 | 11.49565 | 11.82743 | 49.10679 | 44.92132 | 20.09959 |
| 10770 | LOC119628 | 34.97826 | 1.221165 | 0.456524 | 2.674919 | 0.007475 | 0.018451 | 16.80468 | 22.9913  | 23.65487 | 31.24978 | 59.8951  | 55.27387 |
| 17869 | LOC103237 | 8.152377 | 1.220891 | 0.893291 | 1.366734 | 0.171709 | 0.255463 | 4.878777 | 3.284471 | 6.261582 | 15.62489 | 12.83466 | 6.029877 |
| 17501 | LOC103225 | 9.381105 | 1.220711 | 0.864077 | 1.412734 | 0.157734 | 0.23947  | 7.589209 | 2.189647 | 6.957314 | 13.39276 | 17.11289 | 9.044815 |
| 6155  | LOC103222 | 87.00329 | 1.220513 | 0.298105 | 4.094244 | 4.24E-05 | 0.000183 | 48.24569 | 48.17224 | 59.8329  | 109.3742 | 151.8769 | 104.5179 |
| 8855  | SLC6A16   | 49.74095 | 1.220167 | 0.386638 | 3.155842 | 0.0016   | 0.004805 | 37.40396 | 24.63353 | 27.13352 | 60.26743 | 87.70354 | 61.30375 |
| 10958 | LOC119627 | 43.20574 | 1.220111 | 0.462632 | 2.637327 | 0.008356 | 0.020273 | 32.52518 | 15.32753 | 29.22072 | 66.96381 | 77.00798 | 38.18922 |
| 2141  | KIAA0319  | 409.0621 | 1.218867 | 0.158238 | 7.702725 | 1.33E-14 | 1.65E-13 | 241.7705 | 278.6326 | 217.0682 | 553.5675 | 575.4208 | 587.913  |
| 9046  | LOC119624 | 42.68909 | 1.218689 | 0.393335 | 3.098351 | 0.001946 | 0.005719 | 25.47806 | 29.56024 | 21.56767 | 55.80317 | 68.45154 | 55.27387 |
| 6329  | CCDC146   | 114.1453 | 1.218671 | 0.303719 | 4.012492 | 6.01E-05 | 0.000252 | 68.84497 | 88.68071 | 47.30973 | 138.3919 | 198.9373 | 142.7071 |
| 9981  | LOC103227 | 61.86856 | 1.218168 | 0.425042 | 2.865996 | 0.004157 | 0.011072 | 28.73058 | 44.88777 | 36.87376 | 71.42806 | 139.0422 | 50.24897 |
| 19356 | LOC119624 | 6.121214 | 1.217772 | 1.081367 | 1.126142 | 0.260106 | 0.357249 | 2.168345 | 4.379295 | 4.174388 | 11.16063 | 12.83466 | 2.009959 |
| 15539 | CYSRT1    | 14.73564 | 1.217237 | 0.700457 | 1.737775 | 0.08225  | 0.14071  | 5.96295  | 6.568942 | 13.91463 | 20.08914 | 27.80844 | 14.06971 |
| 22699 | LOC103248 | 2.053931 | 1.217193 | 2.000549 | 0.608429 | 0.542903 | 0.635821 | 0        | 2.189647 | 1.391463 | 4.464254 | 4.278221 | 0        |
| 2163  | PAPLN     | 759.8038 | 1.216827 | 0.158728 | 7.66611  | 1.77E-14 | 2.18E-13 | 518.7767 | 370.0504 | 484.9248 | 1044.635 | 962.5998 | 1177.836 |
| 8044  | LOC119627 | 51.90109 | 1.216498 | 0.35766  | 3.401272 | 0.000671 | 0.002217 | 26.02015 | 33.93953 | 34.09084 | 73.66019 | 66.31243 | 77.38342 |
| 20769 | LOC103230 | 4.372463 | 1.216033 | 1.338334 | 0.908617 | 0.363553 | 0.465359 | 1.084173 | 1.094824 | 5.565851 | 8.928508 | 8.556443 | 1.004979 |
| 10206 | FPR1      | 38.64666 | 1.2153   | 0.431629 | 2.815615 | 0.004868 | 0.012682 | 28.18849 | 16.42235 | 25.74206 | 46.87467 | 51.33866 | 63.31371 |
| 18621 | LOC119628 | 6.357533 | 1.215262 | 0.984298 | 1.234649 | 0.216961 | 0.309867 | 2.710432 | 4.379295 | 4.174388 | 11.16063 | 10.69555 | 5.024897 |
| 1365  | FAM228B   | 2032.595 | 1.215247 | 0.125703 | 9.667571 | 4.14E-22 | 8.06E-21 | 1102.062 | 1441.883 | 1127.781 | 2794.623 | 2793.679 | 2935.545 |
| 8861  | IFI27L2   | 2594.766 | 1.215076 | 0.385199 | 3.154413 | 0.001608 | 0.004825 | 1839.299 | 825.497  | 2022.491 | 3821.401 | 3610.819 | 3449.09  |
| 22617 | LOC103226 | 2.069966 | 1.214873 | 1.952571 | 0.622191 | 0.533816 | 0.62747  | 1.626259 | 0        | 2.087194 | 6.696381 | 0        | 2.009959 |
| 20467 | LOC119627 | 4.320158 | 1.214599 | 1.276792 | 0.95129  | 0.341457 | 0.443526 | 3.794605 | 1.642235 | 2.087194 | 6.696381 | 10.69555 | 1.004979 |
| 19024 | LOC103228 | 6.661825 | 1.213688 | 1.028296 | 1.180291 | 0.237885 | 0.33243  |          |          |          |          |          |          |



|       |           |          |          |          |          |          |          |          |          |          |          |          |          |
|-------|-----------|----------|----------|----------|----------|----------|----------|----------|----------|----------|----------|----------|----------|
| 3388  | TLR5      | 331.5874 | 1.212707 | 0.203676 | 5.954101 | 2.62E-09 | 2.05E-08 | 170.7572 | 245.2405 | 184.3688 | 372.7652 | 521.943  | 494.4499 |
| 890   | MANEA     | 4476.961 | 1.212706 | 0.105241 | 11.52311 | 1.01E-30 | 3.01E-29 | 2544.553 | 3037.588 | 2514.373 | 6022.279 | 6372.411 | 6370.565 |
| 2010  | LRP3      | 1588.06  | 1.212303 | 0.152354 | 7.957169 | 1.76E-15 | 2.33E-14 | 1062.489 | 746.6697 | 1065.86  | 2256.68  | 1978.677 | 2417.981 |
| 10163 | LOC119627 | 39.24466 | 1.211647 | 0.429216 | 2.822932 | 0.004759 | 0.012448 | 26.56223 | 26.27577 | 17.39328 | 53.57105 | 68.45154 | 43.21412 |
| 20151 | SHISA3    | 4.593279 | 1.211381 | 1.206924 | 1.003693 | 0.315527 | 0.416271 | 1.626259 | 1.094824 | 5.565851 | 6.696381 | 8.556443 | 4.019918 |
| 19716 | TRNAG-UC  | 4.558252 | 1.210947 | 1.134863 | 1.067042 | 0.285953 | 0.385578 | 3.252518 | 2.737059 | 2.087194 | 6.696381 | 8.556443 | 4.019918 |
| 1338  | CARD6     | 935.8816 | 1.210299 | 0.124152 | 9.748526 | 1.87E-22 | 3.72E-21 | 542.6285 | 627.8814 | 523.19   | 1361.597 | 1253.519 | 1306.473 |
| 20422 | LOC119627 | 4.322821 | 1.210295 | 1.26287  | 0.958368 | 0.337877 | 0.439842 | 2.168345 | 3.284471 | 2.087194 | 6.696381 | 10.69555 | 1.004979 |
| 10559 | TMEM207   | 37.57437 | 1.210284 | 0.443122 | 2.731266 | 0.006309 | 0.015885 | 26.56223 | 15.32753 | 25.74206 | 53.57105 | 62.03421 | 42.20914 |
| 20351 | FNDC7     | 3.804634 | 1.209803 | 1.248578 | 0.968944 | 0.332573 | 0.434448 | 3.794605 | 1.642235 | 1.391463 | 6.696381 | 4.278221 | 5.024897 |
| 1432  | FMNL1     | 845.1964 | 1.209373 | 0.128226 | 9.43157  | 4.04E-21 | 7.50E-20 | 519.3187 | 511.2826 | 502.318  | 1241.063 | 1028.912 | 1268.284 |
| 13773 | CUNH15or  | 23.50425 | 1.209301 | 0.589267 | 2.052213 | 0.040149 | 0.077497 | 10.84173 | 10.40082 | 20.87194 | 40.17829 | 40.6431  | 18.08963 |
| 1603  | PLIN2     | 844.2099 | 1.208932 | 0.134749 | 8.971727 | 2.92E-19 | 4.84E-18 | 546.9651 | 459.8259 | 525.9729 | 1140.617 | 1082.39  | 1309.488 |
| 1349  | ZBTB38    | 18778.98 | 1.20871  | 0.124338 | 9.721186 | 2.45E-22 | 4.83E-21 | 10098.53 | 13696.24 | 10232.82 | 25415    | 25825.48 | 27405.79 |
| 8719  | LOC103215 | 47.6637  | 1.208604 | 0.377949 | 3.197794 | 0.001385 | 0.004222 | 24.93597 | 34.48694 | 26.43779 | 66.96381 | 74.86887 | 58.28881 |
| 23610 | LOC119627 | 1.02519  | 1.208505 | 2.585437 | 0.467428 | 0.640194 | 0.720943 | 1.084173 | 0        | 0.695731 | 2.232127 | 2.139111 | 0        |
| 826   | ATP6VOA1  | 3410.248 | 1.208234 | 0.101529 | 1.190039 | 1.18E-32 | 3.79E-31 | 2014.393 | 2217.018 | 1952.222 | 4624.967 | 4528.497 | 5124.39  |
| 22257 | LOC103215 | 2.254275 | 1.208078 | 1.77074  | 0.682245 | 0.495084 | 0.591356 | 1.626259 | 1.642235 | 0.695731 | 0        | 8.556443 | 1.004979 |
| 8962  | LOC119627 | 43.62376 | 1.208031 | 0.386144 | 3.128447 | 0.001757 | 0.005213 | 24.93597 | 22.9913  | 31.30791 | 58.0353  | 64.17332 | 60.29877 |
| 791   | GFUS      | 2874.873 | 1.207848 | 0.099437 | 12.14685 | 5.96E-34 | 2.00E-32 | 1739.013 | 1699.166 | 1776.202 | 4138.363 | 3651.462 | 4245.033 |
| 13426 | ODAD1     | 26.17899 | 1.207833 | 0.569245 | 2.121817 | 0.033853 | 0.067033 | 13.01007 | 14.23271 | 19.48048 | 58.0353  | 34.22577 | 18.08963 |
| 847   | PLEKHA6   | 2602.026 | 1.207733 | 0.102433 | 11.7905  | 4.37E-32 | 1.37E-30 | 1506.458 | 1690.408 | 1522.956 | 3426.315 | 3595.845 | 3870.176 |
| 14590 | LOC103224 | 21.86068 | 1.207541 | 0.632638 | 1.90874  | 0.056296 | 0.102578 | 19.51511 | 7.663765 | 11.82743 | 29.01765 | 47.06043 | 16.07967 |
| 20247 | LOC119615 | 5.069327 | 1.207219 | 1.221723 | 0.988128 | 0.32309  | 0.424228 | 3.252518 | 4.926706 | 0.695731 | 6.696381 | 12.83466 | 2.009959 |
| 23398 | LOC119627 | 1.569577 | 1.207024 | 2.418235 | 0.499134 | 0.617685 | 0.701799 | 1.626259 | 1.094824 | 0        | 6.696381 | 0        | 0        |
| 19562 | LOC103230 | 5.34943  | 1.206877 | 1.107848 | 1.089389 | 0.275982 | 0.375025 | 4.336691 | 1.642235 | 3.478657 | 8.928508 | 10.69555 | 3.014938 |
| 22387 | LOC119627 | 2.051268 | 1.206676 | 1.827223 | 0.660388 | 0.509005 | 0.604442 | 1.626259 | 0.547412 | 1.391463 | 4.464254 | 4.278221 | 0        |
| 1677  | MCC       | 567.2293 | 1.206671 | 0.137359 | 8.784799 | 1.57E-18 | 2.48E-17 | 340.4302 | 363.4814 | 326.9937 | 745.5304 | 763.6625 | 863.2774 |
| 22242 | CRNN      | 3.031725 | 1.206506 | 1.760936 | 0.68515  | 0.493249 | 0.589556 | 1.626259 | 1.642235 | 2.087194 | 0        | 12.83466 | 0        |
| 2793  | LRRC14    | 1080.47  | 1.205905 | 0.179751 | 6.708753 | 1.96E-11 | 1.87E-10 | 770.8468 | 481.175  | 710.3417 | 1591.507 | 1255.658 | 1673.291 |
| 659   | PCDH9     | 13404.2  | 1.205473 | 0.092237 | 13.06936 | 4.93E-39 | 1.99E-37 | 7792.492 | 8885.041 | 7648.871 | 18379.33 | 18635.93 | 19083.56 |
| 2542  | SLC2A11   | 906.6065 | 1.205381 | 0.170643 | 7.063771 | 1.62E-12 | 1.69E-11 | 685.1972 | 437.382  | 524.5815 | 1145.081 | 1236.406 | 1410.991 |
| 27971 | LOC119627 | 0.515689 | 1.20519  | 4.024073 | 0.299495 | 0.764562 | NA       | 1.084173 | 0        | 0        | 0        | 0        | 2.009959 |
| 29398 | LOC103247 | 0.515689 | 1.20519  | 4.024073 | 0.299495 | 0.764562 | NA       | 1.084173 | 0        | 0        | 0        | 0        | 2.009959 |
| 14097 | LOC103227 | 17.54032 | 1.204258 | 0.603725 | 1.994714 | 0.046074 | 0.086889 | 7.589209 | 10.40082 | 13.91463 | 24.5534  | 25.66933 | 23.11453 |
| 28024 | LOC119615 | 0.516576 | 1.20399  | 3.574844 | 0.336795 | 0.736271 | NA       | 0.542086 | 0.547412 | 0        | 0        | 0        | 2.009959 |
| 3070  | NKIRAS1   | 198.5172 | 1.20366  | 0.190718 | 6.311195 | 2.77E-10 | 2.40E-09 | 118.7169 | 124.8099 | 117.5786 | 265.6231 | 275.9453 | 288.4291 |
| 3568  | TAOK3     | 430.9867 | 1.203515 | 0.208015 | 5.785711 | 7.22E-09 | 5.38E-08 | 222.2554 | 354.7229 | 205.2408 | 604.9064 | 596.8119 | 601.9827 |
| 996   | GREM1     | 24678.46 | 1.202502 | 0.109309 | 11.00094 | 3.78E-28 | 1.01E-26 | 13832.96 | 17324.49 | 13694.08 | 33821.19 | 33842.87 | 35555.17 |
| 7260  | VAMP1     | 67.32855 | 1.202381 | 0.329433 | 3.649847 | 0.000262 | 0.000961 | 31.9831  | 48.17224 | 41.74388 | 95.98146 | 102.6773 | 83.4133  |
| 10501 | LOC103215 | 38.07884 | 1.202048 | 0.437992 | 2.74445  | 0.006061 | 0.015345 | 24.93597 | 24.63353 | 18.78475 | 51.33892 | 70.59065 | 38.18922 |
| 15278 | F2RL2     | 15.06581 | 1.201909 | 0.673856 | 1.78363  | 0.074484 | 0.129608 | 5.96295  | 12.04306 | 9.044508 | 29.01765 | 19.252   | 15.07469 |
| 3335  | KIF26A    | 217.4096 | 1.20187  | 0.200045 | 6.007989 | 1.88E-09 | 1.50E-08 | 144.195  | 111.1246 | 140.5377 | 316.962  | 278.0844 | 313.5536 |
| 23514 | DNAJB7    | 1.548879 | 1.201543 | 2.497033 | 0.481188 | 0.630383 | 0.712713 | 0        | 0        | 2.782925 | 2.232127 | 4.278221 | 0        |
| 5397  | LOC103247 | 104.3169 | 1.201539 | 0.269144 | 4.4643   | 8.03E-06 | 3.96E-05 | 61.25576 | 73.90059 | 53.57132 | 145.0883 | 160.4333 | 131.6523 |
| 15936 | LOC119627 | 13.22234 | 1.201163 | 0.715726 | 1.678243 | 0.0933   | 0.155646 | 9.757555 | 4.379295 | 9.740239 | 17.85702 | 23.53022 | 14.06971 |
| 6922  | LOC119627 | 77.26518 | 1.201126 | 0.318998 | 3.765306 | 0.000166 | 0.000639 | 54.75072 | 50.36189 | 34.78657 | 95.98146 | 126.2075 | 101.5029 |
| 870   | ABHD2     | 8616.113 | 1.200441 | 0.102714 | 11.6872  | 1.48E-31 | 4.53E-30 | 5205.113 | 5367.373 | 5107.364 | 11774.47 | 10806.79 | 13435.57 |
| 14357 | SPATA32   | 17.5364  | 1.20018  | 0.61531  | 1.950531 | 0.051113 | 0.09464  | 9.757555 | 9.306001 | 12.52316 | 22.32127 | 34.22577 | 17.08465 |
| 14899 | LOC103220 | 18.28219 | 1.198254 | 0.645928 | 1.855087 | 0.063584 | 0.113456 | 13.01007 | 9.306001 | 10.43597 | 20.08914 | 42.78221 | 14.06971 |
| 4926  | LOC103247 | 153.1053 | 1.197423 | 0.253193 | 4.729281 | 2.25E-06 | 1.22E-05 | 79.14461 | 121.5254 | 78.61764 | 196.4272 | 211.772  | 231.1453 |
| 505   | LOC103247 | 5491.199 | 1.196888 | 0.082386 | 14.52782 | 8.08E-48 | 4.25E-46 | 3262.818 | 3447.052 | 3297.767 | 7629.41  | 7561.756 | 7748.392 |
| 15128 | EPO       | 20.48631 | 1.195926 | 0.660944 | 1.809422 | 0.070386 | 0.123689 | 10.84173 | 9.853413 | 16.00182 | 31.24978 | 44.92132 | 10.04979 |
| 19317 | OSCAR     | 5.900207 | 1.19555  | 1.055924 | 1.13223  | 0.257538 | 0.354432 | 4.878777 | 1.642235 | 4.174388 | 13.39276 | 4.278221 | 7.034856 |
| 3410  | LOC103237 | 206.6697 | 1.195108 | 0.2013   | 5.936942 | 2.90E-09 | 2.26E-08 | 132.8112 | 108.935  | 136.3633 | 292.4086 | 260.9715 | 308.5287 |
| 23575 | LOC103215 | 1.029273 | 1.194634 | 2.525945 | 0.472945 | 0.636252 | 0.717487 | 0.542086 | 0        | 1.391463 | 2.232127 | 0        | 2.009959 |
| 15151 | GPR4      | 24.83323 | 1.194145 | 0.661304 | 1.805744 | 0.070958 | 0.124508 | 15.17842 | 9.306001 | 20.17621 | 31.24978 | 62.03421 | 11.05477 |
| 7875  | LOC119620 | 65.60079 | 1.193876 | 0.346339 | 3.447129 | 0.000567 | 0.001913 | 49.87195 | 28.46541 | 41.74388 | 93.74933 | 81.28621 | 98.48799 |
| 23920 | LOC119627 | 1.011463 | 1.193715 | 2.843255 | 0.419841 | 0.674602 | 0.749761 | 0        | 1.094824 | 0.695731 | 0        | 4.278221 | 0        |
| 5199  | LOC119627 | 133.4663 | 1.193703 | 0.260613 | 4.58037  | 4.64E-06 | 2.37E-05 | 83.4813  | 60.2153  | 100.1853 | 194.195  | 181.8244 | 180.8963 |
| 1680  | BACE1     | 1560.961 | 1.193447 | 0.135981 | 8.776537 | 1.69E-18 | 2.67E-17 | 887.3954 | 1121.099 | 842.5307 | 2102.664 | 2034.294 | 2377.781 |
| 724   | RHOB      | 4485.553 | 1.193368 | 0.09444  | 12.63621 | 1.33E-36 | 4.90E-35 | 2638.876 | 2833.951 | 2719.614 | 6073.618 | 5918.919 | 6728.338 |
| 1068  | FHOD3     | 3147.572 | 1.193097 | 0.111952 | 10.65726 | 1.61E-26 | 4.01E-25 | 1797.016 | 2166.109 | 1785.247 | 4241.041 | 4226.883 | 4669.135 |
| 4298  | LOC119627 | 130.9654 | 1.192636 | 0.231258 | 5.157174 | 2.51E-07 | 1.55E-06 | 85.10756 | 75.54283 | 77.92191 | 178.5702 | 196.7982 | 171.8515 |
| 21575 | LOC119627 | 2.543124 | 1.192479 | 1.504137 | 0.792799 | 0.427895 | 0.527258 | 2.168345 | 1.642235 | 0.695731 | 4.464254 | 4.278221 | 2.009959 |
| 863   | PREPL     | 23978.69 | 1.192455 | 0.10181  | 1.711258 | 1.10E-31 | 3.39E-30 | 13604.74 | 16550.45 | 13636.33 | 32685.04 | 33218.25 | 34177.34 |
| 1387  | OLFML3    | 2240.933 | 1.192283 | 0.12431  | 9.591221 | 8.70E-22 | 1.67E-20 | 1220.236 | 1603.369 | 1269.71  | 3098.192 | 3031.12  | 3222.969 |
| 20042 | TOMM20L   | 5.123809 | 1.191749 | 1.166762 | 1.021415 | 0.307058 | 0.407281 | 5.96295  | 1.094824 | 2.087194 | 11.16063 | 6.417332 | 4.019918 |
| 19179 | LOC103247 | 5.600824 | 1.191382 | 1.029536 | 1.157203 | 0.247189 | 0.342721 | 3.252518 | 2.189647 | 4.87012  | 6.696381 | 8.556443 | 8.039836 |
| 23580 | SERPINA7  | 1.03016  | 1.191276 | 2.525486 | 0.471702 | 0.63714  | 0.718336 | 0        | 0.547412 | 1.391463 | 2.232127 | 0        | 2.009959 |
| 21016 | LOC119627 | 3.354775 | 1.19075  |          |          |          |          |          |          |          |          |          |          |



|       |           |          |          |          |          |          |          |          |          |          |          |          |          |
|-------|-----------|----------|----------|----------|----------|----------|----------|----------|----------|----------|----------|----------|----------|
| 7215  | LOC119620 | 75.24819 | 1.190383 | 0.32505  | 3.662153 | 0.00025  | 0.000922 | 39.5723  | 60.76271 | 36.87376 | 102.6778 | 109.0946 | 102.5079 |
| 877   | KIAA0930  | 4321.76  | 1.190076 | 0.102233 | 11.64083 | 2.56E-31 | 7.75E-30 | 2734.826 | 2463.353 | 2707.091 | 6131.653 | 5454.732 | 6438.903 |
| 23354 | LOC103232 | 1.298537 | 1.188268 | 2.350479 | 0.505543 | 0.613178 | 0.69801  | 1.626259 | 0        | 0.695731 | 4.464254 | 0        | 1.004979 |
| 1206  | SPIDR     | 1577.336 | 1.188151 | 0.117283 | 10.13066 | 4.04E-24 | 8.90E-23 | 896.0688 | 1092.634 | 897.4935 | 2145.074 | 2226.814 | 2205.93  |
| 22069 | SRGN      | 2.039848 | 1.188082 | 1.664737 | 0.713676 | 0.475428 | 0.572661 | 1.084173 | 0.547412 | 2.087194 | 2.232127 | 4.278221 | 2.009959 |
| 22070 | LOC119620 | 2.039848 | 1.188082 | 1.664737 | 0.713676 | 0.475428 | 0.572661 | 1.084173 | 0.547412 | 2.087194 | 2.232127 | 4.278221 | 2.009959 |
| 22971 | ELOA2     | 1.769695 | 1.188059 | 2.089293 | 0.568641 | 0.5696   | 0.659214 | 0.542086 | 0        | 2.782925 | 0        | 4.278221 | 3.014938 |
| 23413 | LOC103222 | 1.026078 | 1.188045 | 2.390243 | 0.497039 | 0.619161 | 0.703056 | 0.542086 | 0.547412 | 0.695731 | 2.232127 | 2.139111 | 0        |
| 20341 | LOC119620 | 4.080583 | 1.187935 | 1.223685 | 0.970785 | 0.331655 | 0.433462 | 1.626259 | 1.642235 | 4.174388 | 4.464254 | 8.556443 | 4.019918 |
| 702   | RGS3      | 5611.244 | 1.187784 | 0.092631 | 12.82282 | 1.22E-37 | 4.63E-36 | 3424.902 | 3409.281 | 3441.087 | 7723.159 | 7247.307 | 8421.728 |
| 5476  | LOC103242 | 91.66646 | 1.187072 | 0.268319 | 4.424109 | 9.68E-06 | 4.70E-05 | 53.66655 | 57.47824 | 56.35424 | 124.9991 | 136.9031 | 120.5975 |
| 16832 | LOC103232 | 10.24307 | 1.186121 | 0.780775 | 1.519158 | 0.128723 | 0.203309 | 4.336691 | 6.02153  | 8.348776 | 17.85702 | 12.83466 | 12.05975 |
| 16467 | LOC119620 | 12.97009 | 1.185804 | 0.751261 | 1.578419 | 0.114469 | 0.184803 | 7.589209 | 4.926706 | 11.1317  | 11.16063 | 29.94755 | 13.06473 |
| 1304  | LOC103232 | 7023.885 | 1.185559 | 0.120544 | 9.835091 | 7.95E-23 | 1.62E-21 | 4734.582 | 3788.09  | 4351.8   | 9555.736 | 8712.598 | 11000.51 |
| 11038 | ZN423     | 33.3312  | 1.185329 | 0.452273 | 2.620828 | 0.008772 | 0.021127 | 21.14137 | 24.08612 | 15.30609 | 44.64254 | 55.61688 | 39.1942  |
| 1625  | FGF13     | 1239.79  | 1.185217 | 0.133028 | 8.909532 | 5.12E-19 | 8.38E-18 | 679.2342 | 888.4494 | 704.7759 | 1754.452 | 1630.002 | 1781.829 |
| 21431 | LOC119620 | 4.014195 | 1.185125 | 1.456136 | 0.813883 | 0.415712 | 0.515687 | 5.420864 | 0.547412 | 1.391463 | 0        | 10.69555 | 6.029877 |
| 22145 | LOC119620 | 2.330473 | 1.185034 | 1.691428 | 0.700612 | 0.483545 | 0.580494 | 0.542086 | 1.642235 | 2.087194 | 6.696381 | 0        | 3.014938 |
| 9608  | RASIP1    | 45.58748 | 1.185021 | 0.40045  | 2.959226 | 0.003084 | 0.008534 | 22.76763 | 25.72836 | 34.78657 | 80.35657 | 55.61688 | 54.26889 |
| 20311 | LOC103242 | 3.831129 | 1.184501 | 1.212424 | 0.976969 | 0.328584 | 0.430083 | 2.710432 | 2.189647 | 2.087194 | 6.696381 | 4.278221 | 5.024897 |
| 5282  | ACYP2     | 132.8058 | 1.184474 | 0.26148  | 4.529892 | 5.90E-06 | 2.97E-05 | 81.31296 | 62.95236 | 100.1853 | 158.481  | 198.9373 | 194.966  |
| 14795 | LOC103242 | 17.16833 | 1.18401  | 0.631714 | 1.874283 | 0.060891 | 0.109415 | 12.46799 | 10.40082 | 8.348776 | 35.71403 | 14.97377 | 21.10457 |
| 12245 | LRRC46    | 28.25289 | 1.183416 | 0.501956 | 2.357608 | 0.018393 | 0.039935 | 13.55216 | 19.15941 | 18.78475 | 31.24978 | 55.61688 | 31.15436 |
| 2107  | PPFIA4    | 498.5565 | 1.182971 | 0.15193  | 7.786296 | 6.90E-15 | 8.71E-14 | 294.895  | 280.2748 | 342.2998 | 680.7987 | 635.3159 | 757.7545 |
| 1590  | PARP10    | 1050.588 | 1.18295  | 0.131445 | 8.999585 | 2.27E-19 | 3.79E-18 | 709.049  | 566.5712 | 654.6832 | 1404.008 | 1373.309 | 1595.907 |
| 4647  | MZF1      | 143.3436 | 1.182775 | 0.240489 | 4.918215 | 8.73E-07 | 5.00E-06 | 91.07051 | 71.71095 | 100.881  | 176.338  | 216.0502 | 204.0108 |
| 825   | KYNU      | 3193.812 | 1.182564 | 0.099338 | 11.9044  | 1.12E-32 | 3.62E-31 | 1898.929 | 2140.38  | 1820.033 | 4424.076 | 4468.602 | 4410.855 |
| 9392  | PDZD3     | 57.39646 | 1.182114 | 0.39286  | 3.008998 | 0.002621 | 0.007419 | 37.94605 | 24.08612 | 42.43961 | 91.51721 | 94.12087 | 54.26889 |
| 17469 | SLCO2B1   | 11.28729 | 1.181757 | 0.834421 | 1.41626  | 0.156699 | 0.238476 | 8.673382 | 3.284471 | 8.348776 | 17.85702 | 23.53022 | 6.029877 |
| 20600 | LOC119620 | 3.829709 | 1.181639 | 1.26115  | 0.936953 | 0.348783 | 0.450116 | 1.626259 | 3.831883 | 1.391463 | 6.696381 | 6.417332 | 3.014938 |
| 2712  | EGFL7     | 1022.669 | 1.180508 | 0.173066 | 6.821137 | 9.03E-12 | 8.85E-11 | 741.0321 | 476.7957 | 661.6405 | 1562.489 | 1193.624 | 1500.434 |
| 1981  | CNGA3     | 383.1121 | 1.179425 | 0.146851 | 8.03146  | 9.63E-16 | 1.29E-14 | 227.1342 | 235.9345 | 240.7231 | 524.5498 | 549.7514 | 520.5794 |
| 20895 | TREM2     | 3.32874  | 1.178831 | 1.323089 | 0.890969 | 0.372946 | 0.474482 | 1.084173 | 1.642235 | 3.478657 | 4.464254 | 4.278221 | 5.024897 |
| 22408 | LOC103222 | 2.024345 | 1.178816 | 1.799119 | 0.856218 | 0.512327 | 0.607828 | 1.084173 | 0.547412 | 2.087194 | 0        | 6.417332 | 2.009959 |
| 10024 | INCA1     | 38.12151 | 1.178624 | 0.412737 | 2.855626 | 0.004295 | 0.011391 | 22.76763 | 23.53871 | 23.65487 | 64.73168 | 42.78221 | 51.25395 |
| 1808  | PTGR1     | 4020.479 | 1.177275 | 0.139633 | 8.431237 | 3.42E-17 | 5.03E-16 | 2140.699 | 3072.623 | 2181.118 | 5649.513 | 5726.399 | 5352.521 |
| 17836 | LOC119618 | 8.422431 | 1.177245 | 0.858573 | 1.371165 | 0.170324 | 0.253857 | 6.505036 | 3.284471 | 5.565851 | 11.16063 | 14.97377 | 9.044815 |
| 2886  | VWA1      | 1041.191 | 1.176984 | 0.179258 | 6.565851 | 5.17E-11 | 4.77E-10 | 753.5001 | 472.9638 | 692.2527 | 1350.437 | 1285.606 | 1692.385 |
| 12583 | DLEC1     | 27.23699 | 1.176971 | 0.514598 | 2.287167 | 0.022186 | 0.046874 | 17.88885 | 14.78012 | 16.69755 | 53.57105 | 36.36488 | 24.11951 |
| 21160 | TRNAR-UC  | 2.80517  | 1.175987 | 1.372784 | 0.856644 | 0.391642 | 0.492028 | 3.252518 | 2.189647 | 0.695731 | 2.232127 | 4.278221 | 7.034856 |
| 16743 | PARP15    | 13.96783 | 1.175595 | 0.766156 | 1.534408 | 0.124929 | 0.198366 | 8.131296 | 6.568942 | 10.43597 | 31.24978 | 21.39111 | 6.029877 |
| 1087  | NOCT      | 1113.263 | 1.175573 | 0.111409 | 10.55187 | 4.98E-26 | 1.22E-24 | 702.5439 | 692.4759 | 656.7704 | 1526.775 | 1458.873 | 1642.136 |
| 1679  | RAB6B     | 657.7113 | 1.175301 | 0.133902 | 8.777308 | 1.67E-18 | 2.65E-17 | 405.4806 | 385.9253 | 422.3089 | 812.4942 | 941.2087 | 978.85   |
| 8903  | ODAD3     | 47.04477 | 1.17479  | 0.373639 | 3.144181 | 0.001666 | 0.004973 | 24.39389 | 31.74989 | 30.61218 | 71.42806 | 57.75599 | 66.32864 |
| 2954  | MST1      | 261.6695 | 1.174529 | 0.181117 | 6.484892 | 8.88E-11 | 7.99E-10 | 164.2522 | 154.3701 | 164.8883 | 377.2295 | 312.3102 | 396.9669 |
| 20214 | ZYG11A    | 4.604497 | 1.174448 | 1.181116 | 0.994354 | 0.32005  | 0.420923 | 3.252518 | 2.189647 | 2.782925 | 6.696381 | 10.69555 | 2.009959 |
| 22034 | LOC119620 | 2.518508 | 1.174021 | 1.6324   | 0.7192   | 0.472018 | 0.569511 | 2.168345 | 0.547412 | 2.087194 | 0        | 4.278221 | 6.029877 |
| 16084 | LOC119620 | 16.82672 | 1.174005 | 0.711722 | 1.649527 | 0.09904  | 0.163701 | 18.43094 | 6.568942 | 5.565851 | 20.08914 | 34.22577 | 16.07967 |
| 22399 | LOC103212 | 2.29716  | 1.173319 | 1.785506 | 0.657135 | 0.511094 | 0.606609 | 0        | 2.737059 | 1.391463 | 2.232127 | 6.417332 | 1.004979 |
| 1397  | CLTRN     | 881.2134 | 1.173298 | 0.123088 | 9.532175 | 1.54E-21 | 2.93E-20 | 504.6824 | 568.2135 | 549.6278 | 1191.956 | 1324.11  | 1148.692 |
| 17252 | LOC103215 | 10.49913 | 1.173049 | 0.804862 | 1.457454 | 0.144991 | 0.223429 | 3.252518 | 9.853413 | 6.261582 | 17.85702 | 10.69555 | 15.07469 |
| 12811 | LOC103242 | 24.28929 | 1.172441 | 0.524288 | 2.236256 | 0.025335 | 0.052574 | 18.97302 | 11.49565 | 13.91463 | 35.71403 | 38.50399 | 27.13445 |
| 4411  | TLR6      | 185.794  | 1.172439 | 0.231168 | 5.071809 | 3.94E-07 | 2.37E-06 | 101.3702 | 146.159  | 94.61947 | 252.2303 | 263.1106 | 257.2747 |
| 17268 | LOC103242 | 11.73939 | 1.172266 | 0.805041 | 1.456158 | 0.145349 | 0.223783 | 9.215468 | 2.189647 | 10.43597 | 13.39276 | 17.11289 | 18.08963 |
| 21494 | LOC119620 | 2.786354 | 1.171234 | 1.455959 | 0.804442 | 0.421142 | 0.520892 | 2.168345 | 2.189647 | 0.695731 | 2.232127 | 6.417332 | 3.014938 |
| 995   | DPYSL5    | 2019.324 | 1.171079 | 0.106444 | 11.0018  | 3.75E-28 | 1.00E-26 | 1277.698 | 1229.487 | 1223.096 | 2685.249 | 2616.132 | 3084.282 |
| 2645  | SLC11A1   | 264.4971 | 1.1709   | 0.169562 | 6.905443 | 5.00E-12 | 5.03E-11 | 161.5417 | 165.3184 | 161.4097 | 345.9797 | 382.9008 | 369.8324 |
| 23652 | LOC119618 | 1.014657 | 1.170746 | 2.536558 | 0.461549 | 0.644405 | 0.724254 | 0        | 0.547412 | 1.391463 | 0        | 2.139111 | 2.009959 |
| 23654 | LOC119618 | 1.014657 | 1.170746 | 2.536558 | 0.461549 | 0.644405 | 0.724254 | 0        | 0.547412 | 1.391463 | 0        | 2.139111 | 2.009959 |
| 16451 | LOC103224 | 18.19381 | 1.170695 | 0.74115  | 1.579566 | 0.114206 | 0.184559 | 9.757555 | 12.04306 | 11.1317  | 17.85702 | 51.33866 | 7.034856 |
| 11742 | C1QL4     | 28.69002 | 1.170155 | 0.475672 | 2.460004 | 0.013894 | 0.031456 | 14.63633 | 20.25424 | 18.08902 | 46.87467 | 32.08666 | 40.19918 |
| 1128  | ABCA1     | 1367.104 | 1.169106 | 0.112371 | 10.40394 | 2.38E-25 | 5.61E-24 | 806.0824 | 896.6606 | 824.4417 | 1912.933 | 1745.514 | 2016.994 |
| 2552  | GDPD5     | 717.8313 | 1.169023 | 0.165971 | 7.043524 | 1.87E-12 | 1.95E-11 | 466.1943 | 385.3779 | 477.9675 | 993.2965 | 804.3056 | 1179.846 |
| 15932 | LOC119620 | 12.54695 | 1.168742 | 0.696331 | 1.678428 | 0.093264 | 0.155595 | 7.047123 | 6.568942 | 9.740239 | 17.85702 | 14.97377 | 19.09461 |
| 19104 | LOC119620 | 6.95827  | 1.168726 | 0.999489 | 1.169324 | 0.242273 | 0.337146 | 2.710432 | 4.926706 | 4.87012  | 13.39276 | 12.83466 | 3.014938 |
| 20580 | LOC119620 | 4.548404 | 1.168601 | 1.241803 | 0.941052 | 0.346678 | 0.447847 | 2.710432 | 4.926706 | 0.695731 | 2.232127 | 10.69555 | 6.029877 |
| 20063 | GAD2      | 5.679318 | 1.168488 | 1.146907 | 1.018816 | 0.30829  | 0.408508 | 0.542086 | 4.926706 | 4.87012  | 11.16063 | 8.556443 | 4.019918 |
| 17237 | LOC103222 | 15.56807 | 1.168381 | 0.799355 | 1.461655 | 0.143836 | 0.221841 | 4.336691 | 10.94824 | 13.2189  | 8.928508 | 44.92132 | 11.05477 |
| 802   | CAT       | 4878.926 | 1.167579 | 0.096718 | 12.07195 | 1.49E-33 | 4.92E-32 | 2872.516 | 3249.984 | 2897.025 | 6756.648 | 6400.219 | 7097.165 |
| 21424 | GLYATL3   | 3.107923 | 1.167169 | 1.433006 | 0.81     |          |          |          |          |          |          |          |          |



|       |           |          |          |          |          |          |          |          |          |          |          |          |          |
|-------|-----------|----------|----------|----------|----------|----------|----------|----------|----------|----------|----------|----------|----------|
| 1479  | SQSTM1    | 33539.41 | 1.166333 | 0.125376 | 9.302667 | 1.37E-20 | 2.46E-19 | 22928.09 | 17499.66 | 21602.46 | 45113.52 | 41588.59 | 52504.15 |
| 8535  | ADIRF     | 60.31917 | 1.165883 | 0.359291 | 3.244952 | 0.001175 | 0.003659 | 34.69353 | 37.224   | 38.96096 | 69.19594 | 115.512  | 66.32864 |
| 4185  | ZNF696    | 170.7525 | 1.16582  | 0.222644 | 5.236244 | 1.64E-07 | 1.04E-06 | 119.259  | 85.39624 | 111.317  | 247.7661 | 224.6066 | 236.1702 |
| 5056  | LOC103241 | 110.1877 | 1.165534 | 0.250254 | 4.657407 | 3.20E-06 | 1.68E-05 | 67.7608  | 65.68942 | 69.57314 | 167.4095 | 154.016  | 136.6772 |
| 2509  | LOC103221 | 427.1768 | 1.165524 | 0.163748 | 7.11778  | 1.10E-12 | 1.16E-11 | 275.922  | 221.1544 | 294.9901 | 575.8888 | 569.0034 | 626.1022 |
| 1163  | SRC       | 1410.878 | 1.165375 | 0.113268 | 10.28866 | 7.93E-25 | 1.81E-23 | 861.9173 | 890.0916 | 862.7069 | 1830.344 | 1852.47  | 2167.741 |
| 5019  | LOC119611 | 112.8327 | 1.164589 | 0.248945 | 4.678096 | 2.90E-06 | 1.53E-05 | 68.30288 | 77.18507 | 63.31155 | 162.9453 | 145.4595 | 159.7917 |
| 15179 | ANGPTL6   | 18.86551 | 1.164313 | 0.646708 | 1.80037  | 0.071802 | 0.125757 | 8.673382 | 11.49565 | 14.61036 | 13.39276 | 44.92132 | 20.09959 |
| 18787 | GAS2      | 11.56564 | 1.164099 | 0.954549 | 1.219527 | 0.222644 | 0.315047 | 4.878777 | 4.379295 | 11.82743 | 8.928508 | 36.36488 | 3.014938 |
| 11802 | GBA       | 38.43525 | 1.164086 | 0.475388 | 2.448705 | 0.014337 | 0.032295 | 33.60935 | 17.51718 | 20.87194 | 46.87467 | 36.36488 | 75.37346 |
| 12978 | LOC103231 | 33.71401 | 1.163823 | 0.527204 | 2.207539 | 0.027276 | 0.055875 | 12.46799 | 32.2973  | 17.39328 | 66.96381 | 29.94755 | 43.21412 |
| 20296 | LOC103211 | 5.170184 | 1.163318 | 1.189138 | 0.978286 | 0.327933 | 0.42947  | 1.084173 | 2.737059 | 5.565851 | 8.928508 | 10.69555 | 2.009959 |
| 1833  | MYORG     | 525.3557 | 1.162767 | 0.139033 | 8.363245 | 6.10E-17 | 8.85E-16 | 316.0364 | 342.1324 | 317.2535 | 683.0309 | 703.7674 | 789.9139 |
| 9944  | PCED1B    | 52.14886 | 1.162157 | 0.404054 | 2.876245 | 0.004024 | 0.010757 | 27.10432 | 28.46541 | 40.35242 | 102.6778 | 62.03421 | 52.25893 |
| 2725  | ARVCF     | 764.1825 | 1.162022 | 0.170606 | 6.811149 | 9.68E-12 | 9.45E-11 | 541.5443 | 361.8392 | 514.8412 | 1069.189 | 936.9305 | 1160.751 |
| 21019 | FSCN3     | 3.834489 | 1.161862 | 1.324144 | 0.877444 | 0.380246 | 0.480938 | 4.336691 | 0.547412 | 2.087194 | 4.464254 | 8.556443 | 3.014938 |
| 11988 | SEPTIN14  | 42.77053 | 1.161414 | 0.482168 | 2.408732 | 0.016008 | 0.0355   | 28.73058 | 26.27577 | 22.95914 | 66.96381 | 85.56443 | 26.12947 |
| 11545 | LOC103241 | 31.00377 | 1.161262 | 0.46363  | 2.504719 | 0.012255 | 0.02822  | 14.63633 | 19.15941 | 23.65487 | 40.17829 | 49.19955 | 39.1942  |
| 1781  | DAAM1     | 752.0711 | 1.16125  | 0.136541 | 8.504781 | 1.82E-17 | 2.72E-16 | 430.9587 | 527.705  | 436.9193 | 1020.082 | 988.2691 | 1108.492 |
| 904   | TRPM3     | 1494.6   | 1.160199 | 0.101312 | 11.45172 | 2.31E-30 | 6.78E-29 | 905.2842 | 967.8241 | 898.8849 | 2002.218 | 2124.137 | 2069.253 |
| 21460 | LOC119621 | 3.092421 | 1.160169 | 1.433924 | 0.809087 | 0.418465 | 0.518401 | 0.542086 | 1.642235 | 3.478657 | 4.464254 | 6.417332 | 2.009959 |
| 1237  | VCIPI1    | 2546.775 | 1.160042 | 0.11561  | 10.03407 | 1.08E-23 | 2.32E-22 | 1468.512 | 1811.386 | 1444.338 | 3435.243 | 3510.281 | 3610.891 |
| 11309 | AIM2      | 53.04021 | 1.159055 | 0.453381 | 2.556469 | 0.010574 | 0.024857 | 24.93597 | 30.10765 | 42.43961 | 69.19594 | 113.3729 | 38.18922 |
| 1188  | SBNQ2     | 2826.153 | 1.158484 | 0.113655 | 10.19298 | 2.13E-24 | 4.77E-23 | 1796.474 | 1629.645 | 1825.599 | 3716.491 | 3580.871 | 4407.84  |
| 707   | B4GALT5   | 7666.889 | 1.157469 | 0.090665 | 12.76639 | 2.53E-37 | 9.50E-36 | 4878.777 | 4764.672 | 4599.48  | 10428.5  | 9957.56  | 11372.35 |
| 821   | TUSC3     | 3038.27  | 1.15728  | 0.097064 | 11.9228  | 9.00E-33 | 2.92E-31 | 1993.252 | 1741.317 | 1909.783 | 4049.078 | 4276.082 | 4260.108 |
| 2374  | CGNL1     | 1432.736 | 1.156558 | 0.158297 | 7.306253 | 2.75E-13 | 3.08E-12 | 766.5101 | 1122.742 | 773.6533 | 1799.094 | 2012.903 | 2121.512 |
| 16471 | LOC103221 | 13.2647  | 1.156395 | 0.732915 | 1.577804 | 0.114611 | 0.184987 | 7.589209 | 5.474118 | 11.82743 | 8.928508 | 25.66933 | 20.09959 |
| 17299 | CUNH22or  | 9.967319 | 1.156185 | 0.798241 | 1.448416 | 0.147501 | 0.226678 | 4.336691 | 6.568942 | 7.653045 | 8.928508 | 19.252   | 13.06473 |
| 13583 | CDK5R2    | 22.95375 | 1.156137 | 0.552592 | 2.092207 | 0.03642  | 0.071282 | 10.84173 | 18.06459 | 13.91463 | 20.08914 | 40.6431  | 34.1693  |
| 15571 | CYP11A1   | 14.68007 | 1.156082 | 0.666984 | 1.733298 | 0.083043 | 0.141791 | 7.589209 | 8.211177 | 11.1317  | 24.5534  | 23.53022 | 13.06473 |
| 23197 | LOC119611 | 1.285697 | 1.155901 | 2.181586 | 0.529844 | 0.59622  | 0.6833   | 0        | 1.642235 | 0.695731 | 2.232127 | 2.139111 | 1.004979 |
| 16651 | CUNH1orf1 | 11.84261 | 1.15576  | 0.746421 | 1.548403 | 0.121525 | 0.194027 | 6.505036 | 4.379295 | 11.1317  | 17.85702 | 17.11289 | 14.06971 |
| 2298  | CUNH3orf1 | 459.8804 | 1.15529  | 0.155723 | 7.418856 | 1.18E-13 | 1.37E-12 | 321.4572 | 262.7577 | 268.5523 | 649.549  | 678.0981 | 578.8682 |
| 1438  | GSTA4     | 885.2378 | 1.155223 | 0.12279  | 9.408102 | 5.05E-21 | 9.34E-20 | 499.8036 | 581.3513 | 565.6296 | 1265.616 | 1150.842 | 1248.185 |
| 1937  | NEURL1B   | 813.5233 | 1.15477  | 0.142129 | 8.124807 | 4.48E-16 | 6.15E-15 | 507.3928 | 451.6147 | 557.9766 | 1049.1   | 1041.747 | 1273.309 |
| 7443  | IRF4      | 64.67987 | 1.154662 | 0.32218  | 3.583899 | 0.000339 | 0.001209 | 39.03022 | 35.03436 | 46.614   | 91.51721 | 83.42532 | 92.45811 |
| 1138  | GOLGA7    | 1846.879 | 1.154402 | 0.111442 | 10.35875 | 3.82E-25 | 8.92E-24 | 1073.331 | 1277.659 | 1082.558 | 2508.911 | 2652.497 | 2486.319 |
| 3244  | CCDC159   | 215.594  | 1.153701 | 0.188997 | 6.104345 | 1.03E-09 | 8.46E-09 | 130.6428 | 147.2538 | 123.1445 | 299.105  | 290.911  | 302.4988 |
| 23480 | TRNAV-CA  | 1.267532 | 1.153479 | 2.365527 | 0.48762  | 0.625819 | 0.708577 | 1.626259 | 0        | 0.695731 | 0        | 4.278221 | 1.004979 |
| 1716  | DLG4      | 821.6387 | 1.153216 | 0.132731 | 8.688348 | 3.68E-18 | 5.70E-17 | 451.0159 | 575.3298 | 503.0138 | 1109.367 | 1144.424 | 1146.682 |
| 17356 | LOC119621 | 11.06124 | 1.153173 | 0.801688 | 1.438431 | 0.150312 | 0.23024  | 8.673382 | 3.284471 | 8.348776 | 15.62489 | 21.39111 | 9.044815 |
| 14721 | IGSF11    | 24.3675  | 1.152825 | 0.611577 | 1.885004 | 0.059429 | 0.107317 | 22.76763 | 9.306001 | 12.52316 | 53.57105 | 29.94755 | 18.08963 |
| 21706 | DNAJC5G   | 2.844742 | 1.152753 | 1.484011 | 0.776782 | 0.437288 | 0.53558  | 0.542086 | 3.284471 | 1.391463 | 6.696381 | 2.139111 | 3.014938 |
| 2751  | ANK3      | 432.7322 | 1.152574 | 0.170174 | 6.772909 | 1.26E-11 | 1.22E-10 | 237.9759 | 320.2359 | 246.9846 | 549.1032 | 648.1505 | 593.9429 |
| 2537  | FBXL13    | 419.2321 | 1.151888 | 0.162968 | 7.068195 | 1.57E-12 | 1.64E-11 | 272.6694 | 221.1544 | 285.9456 | 587.0494 | 613.9248 | 534.6491 |
| 9605  | TMEM47    | 51.91196 | 1.150671 | 0.388704 | 2.960276 | 0.003074 | 0.008507 | 23.8518  | 43.79295 | 28.52499 | 78.12444 | 74.86887 | 62.30873 |
| 23150 | LOC119621 | 1.792108 | 1.1505   | 2.144008 | 0.536612 | 0.591536 | 0.679308 | 0        | 0.547412 | 2.782925 | 0        | 6.417332 | 1.004979 |
| 8420  | LOC103241 | 57.0642  | 1.150304 | 0.351099 | 3.2763   | 0.001052 | 0.003321 | 39.5723  | 31.74989 | 34.09084 | 84.82083 | 89.84265 | 62.30873 |
| 22827 | HSX2D     | 1.558157 | 1.150253 | 1.954    | 0.588666 | 0.556085 | 0.647634 | 1.084173 | 1.094824 | 0.695731 | 4.464254 | 0        | 2.009959 |
| 19479 | LOC119621 | 7.298561 | 1.149775 | 1.041362 | 1.104107 | 0.269547 | 0.367878 | 4.878777 | 5.474118 | 2.782925 | 20.08914 | 8.556443 | 2.009959 |
| 20601 | MUC13     | 4.114049 | 1.149511 | 1.22701  | 0.93684  | 0.348841 | 0.450169 | 1.084173 | 4.379295 | 2.087194 | 6.696381 | 6.417332 | 4.019918 |
| 14276 | LOC119621 | 21.3094  | 1.149435 | 0.584762 | 1.965646 | 0.049339 | 0.091887 | 13.55216 | 13.6853  | 11.82743 | 26.78552 | 44.92132 | 17.08465 |
| 1909  | BCORL1    | 938.1561 | 1.149083 | 0.140492 | 8.179017 | 2.86E-16 | 3.99E-15 | 512.8137 | 689.1915 | 547.5406 | 1243.295 | 1315.553 | 1320.543 |
| 1398  | RAB7B     | 821.9302 | 1.148855 | 0.12055  | 9.530145 | 1.57E-21 | 2.99E-20 | 532.8709 | 529.8946 | 470.3144 | 1120.528 | 1110.198 | 1167.786 |
| 5862  | LOC119621 | 107.3834 | 1.148812 | 0.271166 | 4.236566 | 2.27E-05 | 0.000103 | 69.38706 | 74.44801 | 54.96278 | 154.0168 | 166.8506 | 124.6175 |
| 15221 | LOC103231 | 14.66154 | 1.148375 | 0.640752 | 1.792232 | 0.073096 | 0.127669 | 8.673382 | 8.758589 | 9.740239 | 22.32127 | 21.39111 | 17.08465 |
| 19284 | LOC103211 | 6.182698 | 1.148114 | 1.008314 | 1.138647 | 0.25485  | 0.351338 | 1.626259 | 4.379295 | 5.565851 | 8.928508 | 8.556443 | 8.039836 |
| 5020  | NUDT18    | 241.9192 | 1.147935 | 0.245393 | 4.677953 | 2.90E-06 | 1.53E-05 | 176.7202 | 103.4608 | 173.2371 | 287.9444 | 310.171  | 399.9818 |
| 21619 | LOC119621 | 2.832434 | 1.147133 | 1.456616 | 0.787533 | 0.43097  | 0.529966 | 0.542086 | 2.737059 | 2.087194 | 4.464254 | 2.139111 | 5.024897 |
| 2234  | TNFAIP2   | 657.8182 | 1.146776 | 0.152133 | 7.537975 | 4.77E-14 | 5.68E-13 | 428.7903 | 370.5978 | 432.0492 | 906.2436 | 770.0798 | 1039.149 |
| 17384 | LOC103221 | 10.34342 | 1.146615 | 0.80065  | 1.432105 | 0.152114 | 0.232624 | 4.336691 | 7.663765 | 6.957314 | 20.08914 | 14.97377 | 8.039836 |
| 17993 | LOC119621 | 9.310372 | 1.146559 | 0.852753 | 1.344539 | 0.178774 | 0.264142 | 3.252518 | 4.926706 | 9.044508 | 15.62489 | 14.97377 | 8.039836 |
| 1557  | CCDC198   | 728.0566 | 1.146083 | 0.12641  | 9.066391 | 1.23E-19 | 2.10E-18 | 428.7903 | 495.4077 | 434.1364 | 1026.778 | 1005.382 | 977.845  |
| 2716  | TNFRSF14  | 682.2637 | 1.145695 | 0.16804  | 6.817987 | 9.23E-12 | 9.04E-11 | 466.7364 | 341.585  | 468.2272 | 982.1359 | 795.7492 | 1039.149 |
| 19427 | LOC103241 | 6.248957 | 1.145529 | 1.028453 | 1.113838 | 0.265349 | 0.363118 | 2.710432 | 3.284471 | 5.565851 | 15.62489 | 4.278221 | 6.029877 |
| 23502 | LOC119621 | 1.270195 | 1.14528  | 2.364845 | 0.484294 | 0.628177 | 0.710551 | 0        | 1.642235 | 0.695731 | 0        | 4.278221 | 1.004979 |
| 23503 | LOC119621 | 1.270195 | 1.14528  | 2.364845 | 0.484294 | 0.628177 | 0.710551 | 0        | 1.642235 | 0.695731 | 0        | 4.278221 | 1.004979 |
| 3107  | LOC119611 | 302.4417 | 1.145152 | 0.182586 | 6.271863 | 3.57E-10 | 3.05E-09 | 196.7774 | 159.8442 | 208.7194 | 377.2295 | 462.0479 | 410.0316 |
| 1120  | NDRG2     | 1032.745 | 1.144102 | 0.109666 | 10.43264 | 1.76E-25 | 4.18E-24 | 634.7831 | 667.295  | 629.6369 | 1417.401 |          |          |



|       |           |          |          |          |          |          |          |          |          |          |          |          |          |
|-------|-----------|----------|----------|----------|----------|----------|----------|----------|----------|----------|----------|----------|----------|
| 1899  | IGFBP6    | 2126.502 | 1.142991 | 0.139458 | 8.195962 | 2.49E-16 | 3.48E-15 | 1499.411 | 1074.022 | 1406.073 | 2912.926 | 2671.749 | 3194.83  |
| 1340  | CCPG1     | 4966.078 | 1.142836 | 0.117332 | 9.740218 | 2.03E-22 | 4.03E-21 | 2791.745 | 3615.655 | 2879.632 | 6560.221 | 7142.491 | 6806.726 |
| 14075 | GBGT1     | 20.05256 | 1.142738 | 0.571732 | 1.998731 | 0.045637 | 0.0862   | 14.09425 | 13.13788 | 9.740239 | 29.01765 | 34.22577 | 20.09959 |
| 22996 | LOC119618 | 1.540879 | 1.142366 | 2.023526 | 0.564542 | 0.572385 | 0.661718 | 2.168345 | 0        | 0.695731 | 2.232127 | 2.139111 | 2.009959 |
| 15979 | LOC103224 | 16.75756 | 1.141578 | 0.68408  | 1.668779 | 0.095161 | 0.158324 | 5.420864 | 13.6853  | 11.82743 | 22.32127 | 34.22577 | 13.06473 |
| 21080 | MGAT4D    | 3.899622 | 1.141257 | 1.314426 | 0.868255 | 0.385255 | 0.485846 | 0.542086 | 3.284471 | 3.478657 | 8.928508 | 2.139111 | 5.024897 |
| 1172  | SLC35A1   | 1180.27  | 1.141002 | 0.111204 | 1.026045 | 1.06E-24 | 2.41E-23 | 773.5572 | 696.8552 | 739.5624 | 1526.775 | 1702.732 | 1642.136 |
| 21245 | LOC119625 | 3.08939  | 1.140905 | 1.354404 | 0.842367 | 0.399582 | 0.500019 | 1.626259 | 2.189647 | 2.087194 | 4.464254 | 2.139111 | 6.029877 |
| 13637 | ISM1      | 23.25153 | 1.140726 | 0.547986 | 2.081669 | 0.037373 | 0.072859 | 9.215468 | 14.78012 | 19.48048 | 37.94616 | 29.94755 | 28.13943 |
| 19166 | LOC119615 | 7.206504 | 1.140658 | 0.984868 | 1.158184 | 0.246789 | 0.342319 | 7.589209 | 3.831883 | 2.087194 | 13.39276 | 4.278221 | 12.05975 |
| 12675 | LY6G5C    | 34.59315 | 1.140653 | 0.503438 | 2.265726 | 0.023468 | 0.049223 | 10.29964 | 25.72836 | 28.52499 | 51.33892 | 53.47777 | 38.18922 |
| 2316  | LOC103235 | 1418.827 | 1.139593 | 0.154247 | 7.388102 | 1.49E-13 | 1.71E-12 | 1005.028 | 724.7732 | 931.5843 | 1886.147 | 1694.176 | 2271.254 |
| 23625 | LOC119626 | 1.59696  | 1.13954  | 2.44913  | 0.465284 | 0.641728 | 0.722101 | 0        | 2.189647 | 0.695731 | 6.696381 | 0        | 0        |
| 16543 | LOC119620 | 15.835   | 1.138957 | 0.72697  | 1.566717 | 0.117181 | 0.188312 | 8.673382 | 12.59047 | 7.653045 | 31.24978 | 27.80844 | 7.034856 |
| 23437 | GPX7      | 1.271614 | 1.138879 | 2.30681  | 0.493703 | 0.621516 | 0.704906 | 1.084173 | 0        | 1.391463 | 0        | 2.139111 | 3.014938 |
| 23440 | TRNAQ-CU  | 1.271614 | 1.138879 | 2.30681  | 0.493703 | 0.621516 | 0.704906 | 1.084173 | 0        | 1.391463 | 0        | 2.139111 | 3.014938 |
| 3305  | LOC119625 | 245.3052 | 1.138683 | 0.188689 | 6.0347   | 1.59E-09 | 1.28E-08 | 160.9997 | 165.3184 | 132.8847 | 308.0335 | 367.927  | 336.6681 |
| 22120 | LOC119627 | 2.842906 | 1.138237 | 1.612912 | 0.705703 | 0.480373 | 0.577337 | 0.542086 | 0.547412 | 4.174388 | 2.232127 | 8.556443 | 1.004979 |
| 1046  | RAP2B     | 5000.921 | 1.138085 | 0.105427 | 10.79497 | 3.64E-27 | 9.24E-26 | 2980.391 | 3520.405 | 2874.066 | 6682.988 | 6817.346 | 7130.329 |
| 10840 | PALM3     | 96.66533 | 1.137191 | 0.4271   | 2.662587 | 0.007754 | 0.019017 | 28.18849 | 49.81448 | 102.9682 | 142.8561 | 164.7115 | 91.45313 |
| 22340 | LOC119623 | 2.592032 | 1.136679 | 1.70055  | 0.668419 | 0.503866 | 0.599613 | 0.542086 | 2.737059 | 1.391463 | 4.464254 | 6.417332 | 0        |
| 15301 | LOC103245 | 18.29914 | 1.1364   | 0.638731 | 1.779151 | 0.075215 | 0.130684 | 10.84173 | 10.40082 | 12.52316 | 22.32127 | 40.6431  | 13.06473 |
| 17831 | LOC103226 | 12.69596 | 1.136346 | 0.828296 | 1.371908 | 0.170092 | 0.253583 | 7.589209 | 13.6853  | 2.087194 | 26.78552 | 14.97377 | 11.05477 |
| 10377 | LOC103224 | 68.50568 | 1.135798 | 0.410024 | 2.770075 | 0.005604 | 0.014358 | 47.7036  | 27.918   | 52.87558 | 55.80317 | 143.3204 | 83.4133  |
| 1219  | DHRS1     | 1408.038 | 1.135576 | 0.112396 | 10.10337 | 5.34E-24 | 1.16E-22 | 922.631  | 896.6606 | 825.8331 | 1890.612 | 1816.105 | 2096.387 |
| 9711  | HOXC13    | 53.08258 | 1.135243 | 0.387981 | 2.926029 | 0.003433 | 0.009399 | 23.8518  | 29.56024 | 46.614   | 66.96381 | 79.14709 | 72.35852 |
| 22846 | LOC119625 | 2.302827 | 1.135083 | 1.937667 | 0.585799 | 0.558011 | 0.649335 | 2.168345 | 0        | 2.087194 | 0        | 8.556443 | 1.004979 |
| 12241 | TRNAY-GU  | 38.47441 | 1.134613 | 0.48116  | 2.358079 | 0.01837  | 0.039892 | 22.76763 | 23.53871 | 27.13352 | 51.33892 | 25.66933 | 80.39836 |
| 1269  | LOC103225 | 4835.474 | 1.134194 | 0.114135 | 9.937338 | 2.86E-23 | 6.00E-22 | 3285.043 | 2677.391 | 3122.442 | 6549.061 | 6085.77  | 7293.136 |
| 21562 | LOC103234 | 3.385518 | 1.134044 | 1.426762 | 0.794837 | 0.426708 | 0.526127 | 2.168345 | 0.547412 | 3.478657 | 6.696381 | 6.417332 | 1.004979 |
| 19545 | GNG8      | 6.181089 | 1.134035 | 1.039025 | 1.091441 | 0.275079 | 0.37416  | 4.336691 | 2.189647 | 4.87012  | 6.696381 | 14.97377 | 4.019918 |
| 20929 | LOC119627 | 4.36917  | 1.133868 | 1.279128 | 0.886438 | 0.375382 | 0.47673  | 2.168345 | 1.094824 | 4.87012  | 2.232127 | 12.83466 | 3.014938 |
| 6771  | LOC119618 | 102.8903 | 1.133628 | 0.296195 | 3.827307 | 0.00013  | 0.000509 | 60.71367 | 58.02565 | 73.05179 | 151.7846 | 173.268  | 100.4979 |
| 16968 | LOC119615 | 11.68051 | 1.133395 | 0.7574   | 1.496429 | 0.134542 | 0.21071  | 7.047123 | 4.379295 | 10.43597 | 22.32127 | 12.83466 | 10.6473  |
| 18306 | LOC103220 | 8.021112 | 1.133024 | 0.884334 | 1.281217 | 0.200118 | 0.290626 | 2.710432 | 6.02153  | 6.261582 | 13.39276 | 10.69555 | 9.044815 |
| 1583  | FAM13A    | 957.8584 | 1.132911 | 0.125469 | 9.029384 | 1.73E-19 | 2.90E-18 | 631.5306 | 629.5236 | 540.5833 | 1236.598 | 1289.884 | 1419.031 |
| 14011 | LOC103217 | 24.36391 | 1.132286 | 0.563019 | 2.011097 | 0.044315 | 0.084085 | 15.7205  | 12.59047 | 17.39328 | 17.85702 | 53.47777 | 29.1444  |
| 15477 | AXDND1    | 22.4108  | 1.132259 | 0.647264 | 1.7493   | 0.080239 | 0.137828 | 16.80468 | 9.853413 | 14.61036 | 44.64254 | 38.50399 | 10.04979 |
| 18208 | LOC103236 | 11.11609 | 1.132055 | 0.870568 | 1.300363 | 0.193477 | 0.28249  | 10.29964 | 8.758589 | 1.391463 | 20.08914 | 17.11289 | 9.044815 |
| 15323 | TRPV1     | 18.02045 | 1.131906 | 0.637569 | 1.775345 | 0.075841 | 0.131582 | 10.84173 | 12.04306 | 10.43597 | 20.08914 | 40.6431  | 14.06971 |
| 20627 | LOC119625 | 5.002063 | 1.131455 | 1.214252 | 0.931813 | 0.351433 | 0.452943 | 1.626259 | 2.737059 | 4.87012  | 15.62489 | 2.139111 | 3.014938 |
| 1067  | RSRC1     | 4586.663 | 1.131212 | 0.106075 | 10.66432 | 1.49E-26 | 3.72E-25 | 2637.25  | 3241.773 | 2744.66  | 6410.669 | 6404.497 | 6081.131 |
| 3848  | ADAP1     | 442.7115 | 1.130894 | 0.205687 | 5.498131 | 3.84E-08 | 2.65E-07 | 313.3259 | 200.9001 | 320.7322 | 611.6028 | 511.2474 | 698.4607 |
| 1468  | ZHX1      | 3989.91  | 1.130673 | 0.121189 | 9.329807 | 1.06E-20 | 1.92E-19 | 2281.099 | 2952.739 | 2272.259 | 5301.302 | 5424.785 | 5707.278 |
| 9920  | ASGR1     | 41.96663 | 1.130568 | 0.392591 | 2.879758 | 0.00398  | 0.010666 | 28.73058 | 22.44388 | 27.82925 | 51.33892 | 64.17332 | 57.28383 |
| 1366  | IGSF8     | 1102.766 | 1.130445 | 0.116998 | 9.662115 | 4.37E-22 | 8.50E-21 | 719.3486 | 650.3252 | 708.2545 | 1486.597 | 1413.952 | 1638.117 |
| 18570 | LOC103235 | 10.0369  | 1.130432 | 0.911532 | 1.240145 | 0.214922 | 0.307684 | 9.757555 | 3.831883 | 4.87012  | 8.928508 | 27.80844 | 5.024897 |
| 905   | GCLC      | 9852.328 | 1.130127 | 0.098759 | 11.44325 | 2.54E-30 | 7.47E-29 | 5954.277 | 6839.363 | 5746.045 | 13272.23 | 13112.75 | 14189.31 |
| 17315 | LOC119626 | 12.52014 | 1.130022 | 0.781458 | 1.446043 | 0.148165 | 0.227489 | 8.131296 | 10.40082 | 4.87012  | 6.696381 | 29.94755 | 15.07469 |
| 16940 | LOC103216 | 19.08783 | 1.129688 | 0.752604 | 1.50104  | 0.133345 | 0.209267 | 9.215468 | 6.02153  | 20.17621 | 35.71403 | 36.36488 | 7.034856 |
| 18861 | TEX49     | 9.051603 | 1.129514 | 0.932887 | 1.210772 | 0.225983 | 0.318528 | 5.96295  | 4.379295 | 6.261582 | 11.16063 | 23.53022 | 3.014938 |
| 16095 | CD177     | 15.03915 | 1.129359 | 0.6857   | 1.647018 | 0.099554 | 0.16444  | 7.589209 | 10.40082 | 9.740239 | 26.78552 | 25.66933 | 10.04979 |
| 18328 | TRNAC-GC  | 8.577391 | 1.128995 | 0.882856 | 1.278799 | 0.200968 | 0.29152  | 4.336691 | 3.284471 | 8.348776 | 15.62489 | 12.83466 | 7.034856 |
| 2741  | NOL4L     | 435.598  | 1.127216 | 0.165973 | 6.791544 | 1.11E-11 | 1.08E-10 | 242.8547 | 307.6454 | 269.9438 | 529.0141 | 680.2372 | 583.8931 |
| 14846 | LOC103220 | 21.75247 | 1.126948 | 0.604995 | 1.862737 | 0.062499 | 0.111918 | 11.38381 | 16.96977 | 11.82743 | 33.6819  | 42.78221 | 14.06971 |
| 19146 | OIT3      | 7.221353 | 1.126932 | 0.970135 | 1.161624 | 0.024588 | 0.340731 | 3.794605 | 2.737059 | 6.957314 | 6.696381 | 17.11289 | 6.029877 |
| 16159 | LOC103247 | 13.15818 | 1.126694 | 0.68905  | 1.635139 | 0.10202  | 0.16785  | 10.29964 | 7.663765 | 6.957314 | 20.08914 | 12.83466 | 21.10457 |
| 1303  | ARAP1     | 4487.016 | 1.126606 | 0.114522 | 9.837421 | 7.77E-23 | 1.58E-21 | 3032.973 | 2566.814 | 2861.543 | 6129.421 | 5480.402 | 6850.945 |
| 20012 | SBK2      | 5.695977 | 1.126358 | 1.097015 | 1.026748 | 0.304539 | 0.404546 | 1.626259 | 2.737059 | 6.261582 | 6.696381 | 12.83466 | 4.019918 |
| 23598 | LOC119627 | 1.507933 | 1.126173 | 2.403573 | 0.468541 | 0.639398 | 0.720332 | 1.626259 | 0        | 1.391463 | 0        | 0        | 6.029877 |
| 11648 | AS3MT     | 45.45966 | 1.126144 | 0.453858 | 2.481127 | 0.013092 | 0.029879 | 37.40396 | 26.27577 | 20.87194 | 58.0353  | 91.98176 | 38.18922 |
| 21341 | LOC119627 | 3.341733 | 1.125879 | 1.363752 | 0.825575 | 0.409045 | 0.509558 | 1.626259 | 3.831883 | 0.695731 | 4.464254 | 6.417332 | 3.014938 |
| 6199  | LOC103227 | 128.106  | 1.125135 | 0.276128 | 4.074687 | 4.61E-05 | 0.000198 | 81.85504 | 71.71095 | 86.27069 | 178.5702 | 224.6066 | 125.6224 |
| 1929  | KNDC1     | 2597.514 | 1.124983 | 0.138197 | 8.14044  | 3.94E-16 | 5.43E-15 | 1796.474 | 1306.125 | 1799.857 | 3499.975 | 3313.482 | 3869.171 |
| 1678  | BST2      | 1480.097 | 1.12489  | 0.1281   | 8.781349 | 1.62E-18 | 2.56E-17 | 997.4389 | 784.9885 | 1011.593 | 2035.7   | 1927.339 | 2123.522 |
| 12235 | MIR9-1HG  | 55.11811 | 1.124148 | 0.476339 | 2.359974 | 0.018276 | 0.039712 | 26.02015 | 19.15941 | 58.44144 | 82.5887  | 96.25998 | 48.23901 |
| 20238 | LOC103247 | 4.854801 | 1.12378  | 1.135757 | 0.989454 | 0.322441 | 0.423564 | 3.794605 | 3.284471 | 2.087194 | 2.232127 | 10.69555 | 7.034856 |
| 7827  | PSD       | 75.29669 | 1.123218 | 0.324722 | 3.45901  | 0.000542 | 0.001842 | 47.16151 | 35.58177 | 59.8329  | 113.8385 | 89.84265 | 105.5228 |
| 974   | SNX10     | 1346.011 | 1.123115 | 0.100957 | 11.12463 | 9.52E-29 | 2.60E-27 | 863.0015 | 837.5401 | 839.7478 | 1908.469 | 1803.27  | 1824.038 |
| 18538 | LOC103246 | 8.037668 | 1.122977 | 0.901249 | 1.246024 |          |          |          |          |          |          |          |          |



|       |            |          |          |          |          |          |          |          |          |          |          |          |          |
|-------|------------|----------|----------|----------|----------|----------|----------|----------|----------|----------|----------|----------|----------|
| 21533 | LOC119621  | 3.137839 | 1.119227 | 1.399329 | 0.799832 | 0.423808 | 0.523241 | 2.168345 | 2.189647 | 1.391463 | 8.928508 | 2.139111 | 2.009959 |
| 7487  | LOC103220  | 72.35049 | 1.119175 | 0.313744 | 3.567154 | 0.000361 | 0.001281 | 42.82482 | 49.26706 | 43.83108 | 95.98146 | 119.7902 | 82.40832 |
| 835   | IGDCC4     | 24302.35 | 1.119027 | 0.094424 | 11.85104 | 2.13E-32 | 6.77E-31 | 15003.87 | 15629.15 | 15342.27 | 31756.47 | 31226.74 | 36855.61 |
| 16515 | MMP27      | 17.91969 | 1.118825 | 0.711478 | 1.572537 | 0.115826 | 0.186451 | 11.38381 | 18.06459 | 4.174388 | 37.94616 | 12.83466 | 23.11453 |
| 477   | SAT1       | 20516.36 | 1.118072 | 0.075405 | 14.82752 | 9.73E-50 | 5.42E-48 | 12781.85 | 12939.72 | 13105.49 | 28002.03 | 27718.6  | 28550.46 |
| 15258 | LOC103216  | 19.59133 | 1.117844 | 0.625806 | 1.786245 | 0.07406  | 0.12903  | 12.46799 | 8.758589 | 15.30609 | 42.41041 | 23.53022 | 15.07469 |
| 1229  | LRATD2     | 2824.466 | 1.117303 | 0.11094  | 10.07124 | 7.40E-24 | 1.60E-22 | 1904.892 | 1672.343 | 1774.115 | 3792.384 | 3518.837 | 4284.227 |
| 741   | LOC103215  | 7561.289 | 1.117261 | 0.089192 | 12.52645 | 5.35E-36 | 1.92E-34 | 5029.477 | 4472.355 | 4815.157 | 10294.57 | 10026.01 | 10730.17 |
| 9784  | MMP9       | 51.88369 | 1.116633 | 0.384036 | 2.907625 | 0.003642 | 0.009896 | 26.56223 | 42.69812 | 28.52499 | 62.49956 | 87.70354 | 63.31371 |
| 20110 | LOC103231  | 5.433683 | 1.116242 | 1.103939 | 1.011145 | 0.311947 | 0.412388 | 1.084173 | 4.926706 | 4.174388 | 6.696381 | 10.69555 | 5.024897 |
| 1036  | LRIG1      | 3310.971 | 1.116049 | 0.103077 | 10.82732 | 2.56E-27 | 6.56E-26 | 2030.113 | 2181.436 | 2064.931 | 4406.219 | 4188.379 | 4994.748 |
| 23391 | LOC119621  | 1.577907 | 1.116024 | 2.231216 | 0.500187 | 0.616944 | 0.701163 | 2.168345 | 0        | 0.695731 | 4.464254 | 2.139111 | 0        |
| 19691 | LOC103238  | 6.252305 | 1.115422 | 1.041256 | 1.071227 | 0.284067 | 0.383502 | 1.626259 | 6.568942 | 3.478657 | 13.39276 | 6.417332 | 6.029877 |
| 2369  | STAC2      | 388.1626 | 1.115278 | 0.152512 | 7.312726 | 2.62E-13 | 2.94E-12 | 224.9658 | 252.3568 | 259.5078 | 535.7105 | 502.691  | 553.7437 |
| 2134  | CLCN4      | 416.7448 | 1.115204 | 0.144351 | 7.725618 | 1.11E-14 | 1.39E-13 | 258.0331 | 276.9904 | 255.3334 | 544.639  | 577.5599 | 587.913  |
| 1082  | RNF139     | 3202.312 | 1.114872 | 0.10548  | 10.56953 | 4.13E-26 | 1.01E-24 | 2182.44  | 1797.153 | 2088.586 | 4488.807 | 4410.846 | 4246.038 |
| 15655 | RSPH6A     | 18.45463 | 1.114203 | 0.646294 | 1.723986 | 0.08471  | 0.143853 | 10.29964 | 8.211177 | 16.00182 | 26.78552 | 36.36488 | 13.06473 |
| 11098 | LOC119621  | 38.28856 | 1.11412  | 0.427554 | 2.605802 | 0.009166 | 0.021957 | 29.81475 | 16.96977 | 25.74206 | 51.33892 | 55.61688 | 50.24897 |
| 17059 | WDR49      | 13.0258  | 1.113887 | 0.74951  | 1.486154 | 0.137238 | 0.213874 | 5.420864 | 10.40082 | 8.348776 | 24.5534  | 21.39111 | 8.039836 |
| 1140  | ROBO2      | 13517.45 | 1.113735 | 0.107631 | 10.34771 | 4.29E-25 | 1.00E-23 | 7961.08  | 9746.12  | 7927.859 | 17801.21 | 18056.23 | 19612.17 |
| 15901 | LOC103231  | 15.26011 | 1.113429 | 0.661126 | 1.684141 | 0.092155 | 0.154064 | 14.09425 | 6.568942 | 8.348776 | 22.32127 | 17.11289 | 23.11453 |
| 21559 | LOC119621  | 2.853071 | 1.113342 | 1.39951  | 0.795523 | 0.426309 | 0.525694 | 1.084173 | 2.189647 | 2.087194 | 4.464254 | 4.278221 | 3.014938 |
| 3357  | LOC119621  | 227.5357 | 1.113233 | 0.185992 | 5.985389 | 2.16E-09 | 1.71E-08 | 150.7    | 137.4004 | 144.7121 | 279.0159 | 318.7275 | 334.6582 |
| 15899 | LOC103241  | 16.60832 | 1.112722 | 0.66067  | 1.684231 | 0.092137 | 0.154064 | 10.84173 | 14.78012 | 5.565851 | 31.42978 | 17.11289 | 20.09959 |
| 1926  | SLC45A4    | 784.6336 | 1.112676 | 0.136653 | 8.142346 | 3.88E-16 | 5.35E-15 | 538.2918 | 430.8131 | 521.1028 | 1098.206 | 996.8256 | 1122.562 |
| 10160 | LOC119618  | 48.67967 | 1.112103 | 0.393864 | 2.823571 | 0.004749 | 0.012427 | 37.94605 | 32.2973  | 22.2634  | 51.33892 | 74.86887 | 73.3635  |
| 12973 | LOC103241  | 30.22997 | 1.111877 | 0.50351  | 2.208252 | 0.027227 | 0.055794 | 11.9259  | 22.44388 | 22.95914 | 31.24978 | 55.61688 | 37.18424 |
| 17670 | LOC103241  | 12.58589 | 1.111715 | 0.799281 | 1.390894 | 0.164258 | 0.24713  | 4.336691 | 6.02153  | 13.2189  | 26.78552 | 17.11289 | 8.039836 |
| 10205 | LOC103221  | 42.89183 | 1.111699 | 0.394822 | 2.815696 | 0.004867 | 0.012682 | 28.73058 | 23.53871 | 29.91645 | 51.33892 | 53.47777 | 70.34856 |
| 10999 | ABCG1      | 41.89213 | 1.111631 | 0.422736 | 2.629609 | 0.008548 | 0.020662 | 26.02015 | 20.80165 | 32.00364 | 71.42806 | 59.8951  | 41.20416 |
| 20094 | LOC103221  | 4.900881 | 1.110886 | 1.095926 | 1.013651 | 0.310749 | 0.411131 | 2.168345 | 3.831883 | 3.478657 | 4.464254 | 6.417332 | 9.044815 |
| 18142 | LOC103231  | 9.580296 | 1.110425 | 0.844902 | 1.314264 | 0.188757 | 0.276602 | 9.757555 | 2.737059 | 5.565851 | 13.39276 | 14.97377 | 11.05477 |
| 17948 | TMC4       | 11.22464 | 1.110219 | 0.821458 | 1.351523 | 0.176528 | 0.261478 | 6.505036 | 10.40082 | 4.174388 | 26.78552 | 6.417332 | 13.06473 |
| 23285 | SELENOW    | 1.832331 | 1.109956 | 2.15303  | 0.515532 | 0.606181 | 0.692031 | 0        | 0        | 3.478657 | 2.232127 | 4.278221 | 1.004979 |
| 23286 | LOC119621  | 1.832331 | 1.109956 | 2.15303  | 0.515532 | 0.606181 | 0.692031 | 0        | 0        | 3.478657 | 2.232127 | 4.278221 | 1.004979 |
| 4527  | SP110      | 299.2883 | 1.10934  | 0.221948 | 4.998205 | 5.79E-07 | 3.40E-06 | 157.205  | 254.5465 | 157.2353 | 419.6399 | 367.927  | 439.176  |
| 21293 | LOC103215  | 3.110028 | 1.109261 | 1.328883 | 0.834732 | 0.403869 | 0.504243 | 2.168345 | 1.642235 | 2.087194 | 4.464254 | 4.278221 | 4.019918 |
| 1901  | BAG3       | 1648.293 | 1.109101 | 0.135346 | 8.194581 | 2.51E-16 | 3.52E-15 | 909.0788 | 1218.539 | 1007.419 | 2209.806 | 2070.659 | 2474.259 |
| 17736 | SCUBE2     | 10.61541 | 1.107722 | 0.803769 | 1.378159 | 0.168154 | 0.252037 | 6.505036 | 7.663765 | 5.565851 | 13.39276 | 23.53022 | 7.034856 |
| 1409  | UBXN8      | 829.8668 | 1.107479 | 0.116586 | 9.499258 | 2.11E-21 | 5.99E-20 | 527.45   | 498.1448 | 553.8022 | 1120.528 | 1131.59  | 1147.687 |
| 924   | SPR        | 2760.787 | 1.107146 | 0.097332 | 11.37492 | 5.58E-30 | 1.60E-28 | 1799.727 | 1742.959 | 1712.195 | 3776.759 | 3508.141 | 4024.943 |
| 5567  | LOC103221  | 131.9397 | 1.107131 | 0.252332 | 4.387591 | 1.15E-05 | 5.47E-05 | 97.57555 | 75.54283 | 79.31338 | 154.0168 | 171.1289 | 214.0606 |
| 20058 | LOC119621  | 5.656972 | 1.107041 | 1.086207 | 1.01918  | 0.308118 | 0.40832  | 3.794605 | 2.737059 | 4.174388 | 2.232127 | 14.97377 | 6.029877 |
| 22763 | LOC119621  | 2.106565 | 1.106946 | 1.846599 | 0.599451 | 0.548872 | 0.641039 | 0        | 0.547412 | 3.478657 | 4.464254 | 2.139111 | 2.009959 |
| 16180 | INHBB      | 20.50289 | 1.106832 | 0.678983 | 1.630132 | 0.103074 | 0.169358 | 7.047123 | 14.78012 | 16.69755 | 20.08914 | 51.33866 | 13.06473 |
| 21831 | CUNH4orf.2 | 2.838456 | 1.106617 | 1.465556 | 0.755084 | 0.450199 | 0.548236 | 0.542086 | 2.737059 | 2.087194 | 2.232127 | 6.417332 | 3.014938 |
| 11373 | WDR93      | 40.14347 | 1.106171 | 0.434958 | 2.543167 | 0.010985 | 0.025679 | 22.22554 | 29.56024 | 23.65487 | 75.89232 | 51.33866 | 38.18922 |
| 7658  | MTARC1     | 77.73896 | 1.105506 | 0.31516  | 3.507756 | 0.000452 | 0.001569 | 61.25576 | 45.43518 | 40.35242 | 107.1421 | 119.7902 | 92.45811 |
| 7208  | LOC119620  | 83.30389 | 1.10538  | 0.301691 | 3.663944 | 0.000248 | 0.000916 | 43.36691 | 60.76271 | 53.57132 | 118.3027 | 128.3466 | 95.47305 |
| 7899  | SPRY3      | 73.78845 | 1.105346 | 0.32127  | 3.440554 | 0.000581 | 0.001954 | 53.7777  | 54.74118 | 49.39693 | 113.8385 | 100.5382 | 88.43819 |
| 15694 | SLC5A2     | 16.9677  | 1.105106 | 0.643216 | 1.718093 | 0.08578  | 0.145307 | 8.673382 | 7.663765 | 16.00182 | 31.42978 | 17.11289 | 21.10457 |
| 3916  | LOC119620  | 278.1296 | 1.104858 | 0.20335  | 5.433281 | 5.53E-08 | 3.76E-07 | 152.8684 | 218.9647 | 158.6268 | 334.819  | 391.4573 | 412.0416 |
| 1360  | PIK3C2B    | 1422.27  | 1.104687 | 0.114062 | 9.684975 | 3.49E-22 | 6.83E-21 | 841.8601 | 941.5483 | 928.8014 | 1928.558 | 1790.436 | 2102.417 |
| 2238  | PTHLH      | 426.0818 | 1.103788 | 0.146543 | 7.532164 | 4.99E-14 | 5.93E-13 | 269.4169 | 258.3784 | 282.4669 | 618.2992 | 588.2554 | 539.674  |
| 2861  | SCD5       | 404.7179 | 1.103063 | 0.167179 | 6.598077 | 4.17E-11 | 3.87E-10 | 228.7604 | 245.2405 | 299.8602 | 573.9426 | 515.5257 | 600.9777 |
| 16321 | LOC103231  | 12.73907 | 1.102843 | 0.688601 | 1.960157 | 0.10925  | 0.177956 | 8.673382 | 6.568942 | 9.044508 | 20.08914 | 14.97377 | 17.08465 |
| 2435  | HSD11B1L   | 423.51   | 1.101984 | 0.152651 | 7.218982 | 5.24E-13 | 5.72E-12 | 281.8849 | 249.6198 | 278.2925 | 522.3177 | 581.8381 | 627.1072 |
| 20325 | LOC103228  | 5.664604 | 1.101819 | 1.130867 | 0.974313 | 0.329901 | 0.431509 | 1.084173 | 4.926706 | 4.87012  | 2.232127 | 12.83466 | 8.039836 |
| 24107 | LOC103231  | 1.035295 | 1.1015   | 2.827583 | 0.389555 | 0.696865 | 0.768497 | 0.542086 | 0        | 1.391463 | 0        | 4.278221 | 0        |
| 1429  | LOC103211  | 3010.732 | 1.100732 | 0.116615 | 9.439042 | 3.76E-21 | 7.00E-20 | 1820.326 | 2194.027 | 1731.675 | 3977.65  | 3968.05  | 4372.666 |
| 23452 | LOC119620  | 1.562404 | 1.100692 | 2.23664  | 0.492118 | 0.622636 | 0.705815 | 2.168345 | 0        | 0.695731 | 2.232127 | 4.278221 | 0        |
| 13679 | LOC103231  | 26.79853 | 1.099853 | 0.53063  | 2.07273  | 0.038197 | 0.074236 | 22.22554 | 10.94824 | 17.39328 | 40.17829 | 44.92132 | 25.12449 |
| 17358 | LOC119621  | 10.36359 | 1.099765 | 0.764822 | 1.437936 | 0.150452 | 0.230428 | 5.420864 | 8.758589 | 5.565851 | 13.39276 | 14.97377 | 14.06971 |
| 1190  | GSR        | 10054.58 | 1.099426 | 0.108036 | 10.17651 | 2.52E-24 | 5.64E-23 | 6135.334 | 7269.629 | 5792.659 | 13156.16 | 13467.84 | 14505.87 |
| 1417  | ACAP3      | 2192.131 | 1.099152 | 0.11599  | 9.476227 | 2.64E-21 | 4.95E-20 | 1479.896 | 1306.672 | 1403.986 | 2883.908 | 2716.671 | 3361.656 |
| 10062 | GRP52      | 50.32556 | 1.098126 | 0.385503 | 2.848556 | 0.004392 | 0.011604 | 42.28274 | 26.82318 | 26.43779 | 66.96381 | 79.14709 | 60.29877 |
| 1328  | CD81       | 7877.995 | 1.097797 | 0.112314 | 9.774394 | 1.45E-22 | 2.90E-21 | 5469.109 | 4521.622 | 5066.316 | 10321.36 | 9889.109 | 12000.46 |
| 1305  | CNPY4      | 861.5643 | 1.097661 | 0.111614 | 9.834474 | 8.00E-23 | 1.63E-21 | 544.7968 | 547.9592 | 554.4979 | 1156.242 | 1167.954 | 1197.936 |
| 13249 | LOC119621  | 24.58293 | 1.097413 | 0.508554 | 2.15791  | 0.030935 | 0.062073 | 14.63633 | 18.612   | 13.91463 | 26.78552 | 36.36488 | 37.18424 |
| 10959 | LOC119621  | 45.60753 | 1.097309 | 0.416074 | 2.637291 | 0.008357 | 0.020273 | 23.30971 |          |          |          |          |          |



|       |           |          |          |          |          |          |          |          |          |          |          |          |          |
|-------|-----------|----------|----------|----------|----------|----------|----------|----------|----------|----------|----------|----------|----------|
| 22080 | LOC119621 | 3.126358 | 1.095883 | 1.538129 | 0.712478 | 0.476169 | 0.573322 | 0.542086 | 0.547412 | 4.87012  | 2.232127 | 8.556443 | 2.009959 |
| 671   | ACSL5     | 6905.067 | 1.095388 | 0.084247 | 13.00205 | 1.19E-38 | 4.72E-37 | 4356.748 | 4554.466 | 4299.62  | 9091.453 | 9343.635 | 9784.48  |
| 23173 | HSPB3     | 1.787303 | 1.094665 | 2.050769 | 0.533783 | 0.593492 | 0.680878 | 2.168345 | 0        | 1.391463 | 0        | 2.139111 | 5.024897 |
| 23424 | LOC119620 | 2.062058 | 1.094653 | 2.208591 | 0.495634 | 0.620153 | 0.703824 | 1.626259 | 2.189647 | 0        | 0        | 8.556443 | 0        |
| 19211 | LOC103241 | 6.514928 | 1.094312 | 0.950213 | 1.151649 | 0.249465 | 0.345221 | 4.878777 | 3.284471 | 4.174388 | 11.16063 | 8.556443 | 7.034856 |
| 19361 | CLVS2     | 6.241581 | 1.092954 | 0.971043 | 1.125546 | 0.260358 | 0.357484 | 4.336691 | 3.284471 | 4.174388 | 8.928508 | 10.69555 | 6.029877 |
| 1798  | XXYL1     | 651.5562 | 1.092402 | 0.129149 | 8.458461 | 2.71E-17 | 4.01E-16 | 418.4907 | 429.1709 | 401.437  | 808.03   | 932.6523 | 919.5562 |
| 23338 | LOC103211 | 1.308642 | 1.092287 | 2.150019 | 0.508036 | 0.611428 | 0.696496 | 1.084173 | 0        | 1.391463 | 2.232127 | 2.139111 | 1.004979 |
| 20265 | ARSL      | 5.241313 | 1.092224 | 1.108455 | 0.985357 | 0.324449 | 0.425621 | 2.168345 | 1.642235 | 6.261582 | 8.928508 | 6.417332 | 6.029877 |
| 16503 | LOC103231 | 14.10768 | 1.092005 | 0.693355 | 1.574957 | 0.115266 | 0.185685 | 10.84173 | 4.926706 | 11.1317  | 24.5534  | 17.11289 | 16.07967 |
| 757   | LOC103221 | 5327.064 | 1.091797 | 0.087763 | 12.44025 | 1.58E-35 | 5.55E-34 | 3530.609 | 3317.863 | 3359.687 | 7470.929 | 6866.545 | 7416.748 |
| 7198  | LOC119621 | 79.77676 | 1.090828 | 0.297361 | 3.668365 | 0.000244 | 0.000902 | 53.66655 | 50.36189 | 48.00546 | 102.6778 | 130.4858 | 93.46309 |
| 1514  | PIK3CB    | 2914.944 | 1.090393 | 0.118481 | 9.203133 | 3.48E-20 | 6.10E-19 | 1763.949 | 2110.273 | 1717.761 | 3783.455 | 3745.583 | 4368.646 |
| 18939 | TMEM95    | 9.372187 | 1.089565 | 0.910046 | 1.197263 | 0.231204 | 0.324545 | 5.96295  | 2.737059 | 9.044508 | 8.928508 | 23.53022 | 6.029877 |
| 19052 | LOC103221 | 12.64208 | 1.08947  | 0.925565 | 1.176978 | 0.239204 | 0.333783 | 11.38381 | 3.284471 | 9.044508 | 22.32127 | 27.80844 | 2.009959 |
| 739   | CALM1     | 19056.38 | 1.08942  | 0.086845 | 12.54438 | 4.27E-36 | 1.54E-34 | 11903.13 | 12829.69 | 11825.35 | 25229.73 | 25051.13 | 27499.25 |
| 22842 | LOC119621 | 2.871708 | 1.08926  | 1.856771 | 0.586642 | 0.557444 | 0.64879  | 0        | 0        | 5.565851 | 2.232127 | 6.417332 | 3.014938 |
| 16035 | LOC103211 | 15.94394 | 1.089085 | 0.656202 | 1.659679 | 0.096979 | 0.160785 | 10.84173 | 11.49565 | 7.653045 | 31.24978 | 21.39111 | 13.06473 |
| 24096 | LOC103241 | 1.05488  | 1.088834 | 2.784408 | 0.391047 | 0.695763 | 0.767568 | 0        | 0        | 2.087194 | 2.232127 | 0        | 2.009959 |
| 24097 | LOC119621 | 1.05488  | 1.088834 | 2.784408 | 0.391047 | 0.695763 | 0.767568 | 0        | 0        | 2.087194 | 2.232127 | 0        | 2.009959 |
| 24098 | CLDN9     | 1.05488  | 1.088834 | 2.784408 | 0.391047 | 0.695763 | 0.767568 | 0        | 0        | 2.087194 | 2.232127 | 0        | 2.009959 |
| 2310  | COBL      | 1080.065 | 1.088766 | 0.147109 | 7.4011   | 1.35E-13 | 1.55E-12 | 610.9313 | 809.0747 | 654.6832 | 1493.293 | 1281.327 | 1631.082 |
| 2125  | SLC35F6   | 1024.11  | 1.088739 | 0.140574 | 7.744961 | 9.56E-15 | 1.20E-13 | 648.8774 | 644.3037 | 676.2509 | 1406.24  | 1152.981 | 1616.007 |
| 4135  | SPATA6L   | 201.7792 | 1.088655 | 0.206693 | 5.267012 | 1.39E-07 | 8.91E-07 | 135.5216 | 114.9565 | 134.9719 | 296.8729 | 295.1973 | 233.1552 |
| 19462 | LOC119621 | 6.975718 | 1.087576 | 0.981706 | 1.107843 | 0.26793  | 0.365991 | 3.794605 | 3.831883 | 6.261582 | 4.464254 | 6.417332 | 17.08465 |
| 2340  | DGAT1     | 1247.906 | 1.087405 | 0.147891 | 7.352731 | 1.94E-13 | 2.21E-12 | 888.4796 | 642.6615 | 867.577  | 1698.649 | 1535.881 | 1854.187 |
| 16286 | LOC103231 | 21.49441 | 1.085943 | 0.674586 | 1.609792 | 0.107443 | 0.175389 | 9.215468 | 25.18094 | 6.261582 | 42.41041 | 27.80844 | 18.08963 |
| 1413  | EPB41L1   | 5822.21  | 1.085773 | 0.114521 | 9.481014 | 2.52E-21 | 4.74E-20 | 3430.323 | 4299.92  | 3459.176 | 7801.284 | 7499.722 | 8442.833 |
| 1444  | ANKRD33B  | 3073.831 | 1.085752 | 0.115636 | 9.389366 | 6.04E-21 | 1.11E-19 | 1910.312 | 2148.591 | 1852.037 | 3819.169 | 4006.554 | 4706.319 |
| 23092 | ST8SIA6   | 1.566486 | 1.084211 | 1.982283 | 0.546951 | 0.584413 | 0.672814 | 1.626259 | 0        | 1.391463 | 2.232127 | 2.139111 | 2.009959 |
| 2102  | GPC1      | 13016.37 | 1.083802 | 0.139059 | 7.793841 | 6.50E-15 | 8.22E-14 | 9224.684 | 6668.023 | 9146.085 | 17298.98 | 15701.07 | 20059.39 |
| 10105 | COL5A3    | 82.00844 | 1.083675 | 0.381931 | 2.837354 | 0.004549 | 0.011968 | 46.07734 | 50.9093  | 59.13717 | 116.0706 | 162.5724 | 57.28383 |
| 916   | TM2D2     | 1906.629 | 1.083617 | 0.094994 | 11.40719 | 3.85E-30 | 1.12E-28 | 1241.378 | 1230.034 | 1195.962 | 2667.392 | 2492.064 | 2612.947 |
| 12542 | OSBP2     | 41.57953 | 1.082505 | 0.471736 | 2.294725 | 0.021749 | 0.046101 | 22.22554 | 26.82318 | 29.91645 | 55.80317 | 85.56443 | 29.1444  |
| 2781  | SPTLC3    | 560.9226 | 1.081446 | 0.16073  | 6.728347 | 1.72E-11 | 1.64E-10 | 342.5986 | 431.3605 | 305.4261 | 790.173  | 725.1585 | 770.8193 |
| 3326  | TIGD5     | 962.9335 | 1.08142  | 0.179657 | 6.019347 | 1.75E-09 | 1.40E-08 | 725.8536 | 446.1406 | 684.5997 | 1245.527 | 1202.18  | 1473.3   |
| 8643  | LOC119611 | 65.74627 | 1.081415 | 0.336186 | 3.216717 | 0.001297 | 0.003988 | 33.06727 | 47.62483 | 45.22254 | 91.51721 | 102.6773 | 74.36848 |
| 13177 | LOC103231 | 27.93304 | 1.080918 | 0.497086 | 2.17451  | 0.029667 | 0.059854 | 17.88885 | 16.42235 | 18.78475 | 40.17829 | 49.19955 | 25.12449 |
| 18887 | LOC119621 | 7.577606 | 1.080869 | 0.896112 | 1.206177 | 0.027749 | 0.320576 | 7.794605 | 4.379295 | 6.261582 | 11.16063 | 12.83466 | 7.034856 |
| 7558  | ARHGAP22  | 69.35139 | 1.080781 | 0.305349 | 3.539493 | 0.000401 | 0.00141  | 41.74065 | 47.62483 | 43.83108 | 98.21359 | 96.25998 | 88.43819 |
| 5016  | MMP11     | 157.2995 | 1.08078  | 0.230963 | 4.679442 | 2.88E-06 | 1.52E-05 | 114.3802 | 82.11177 | 106.4469 | 198.6593 | 233.1631 | 209.0357 |
| 16600 | LOC103231 | 14.52982 | 1.080707 | 0.693913 | 1.557409 | 0.119373 | 0.191177 | 10.29964 | 7.116354 | 10.43597 | 11.16063 | 32.08666 | 16.07967 |
| 10452 | LOC119621 | 50.5174  | 1.080661 | 0.392264 | 2.754931 | 0.00587  | 0.014932 | 41.74065 | 21.89647 | 34.09084 | 66.96381 | 62.03421 | 76.37844 |
| 4432  | CFAP74    | 185.3232 | 1.080573 | 0.213645 | 5.057786 | 4.24E-07 | 2.54E-06 | 118.7169 | 126.9995 | 111.317  | 207.5878 | 293.0582 | 254.2598 |
| 14873 | LOC119621 | 25.57268 | 1.08006  | 0.58094  | 1.859158 | 0.063005 | 0.112619 | 20.0572  | 6.568942 | 22.95914 | 35.71403 | 29.94755 | 38.18922 |
| 639   | UGCG      | 25088.97 | 1.079502 | 0.081689 | 13.21477 | 7.21E-40 | 3.00E-38 | 16292.41 | 16700.44 | 15360.36 | 33952.88 | 33085.62 | 35142.12 |
| 10293 | C3AR1     | 44.01674 | 1.079309 | 0.386843 | 2.790042 | 0.00527  | 0.013612 | 30.35684 | 26.82318 | 27.13352 | 55.80317 | 72.72976 | 51.25395 |
| 4576  | EPM2A     | 149.4566 | 1.078766 | 0.217666 | 4.956053 | 7.19E-07 | 4.18E-06 | 97.57555 | 100.1764 | 91.14081 | 191.9629 | 196.7982 | 219.0855 |
| 1986  | SMIM8     | 622.327  | 1.078606 | 0.134447 | 8.022565 | 1.04E-15 | 1.39E-14 | 385.4234 | 404.5373 | 407.0029 | 915.1721 | 862.0616 | 759.7645 |
| 15520 | LOC119621 | 16.46029 | 1.078436 | 0.620007 | 1.739392 | 0.081966 | 0.140403 | 8.131296 | 11.49565 | 11.82743 | 24.5534  | 25.66933 | 17.08465 |
| 1579  | BSN       | 738.4066 | 1.078396 | 0.119347 | 9.035803 | 1.63E-19 | 2.74E-18 | 462.3997 | 481.175  | 482.1418 | 984.368  | 971.1562 | 1049.199 |
| 1055  | ABCA2     | 3461.794 | 1.078034 | 0.100537 | 10.72278 | 7.96E-27 | 2.01E-25 | 2219.302 | 2146.949 | 2315.394 | 4562.468 | 4385.177 | 5141.475 |
| 1841  | SLC52A2   | 2126.147 | 1.077907 | 0.129363 | 8.332405 | 7.92E-17 | 1.14E-15 | 1478.27  | 1228.94  | 1397.724 | 2883.908 | 2487.786 | 3280.253 |
| 15942 | TRNAS-GCI | 16.92073 | 1.077285 | 0.642222 | 1.677434 | 0.093458 | 0.155831 | 9.757555 | 8.211177 | 14.61036 | 15.62489 | 34.22577 | 19.09461 |
| 3952  | NHSL2     | 234.1464 | 1.077004 | 0.199128 | 5.408614 | 6.35E-08 | 4.27E-07 | 143.1108 | 164.2235 | 142.6249 | 379.4616 | 293.0582 | 282.3992 |
| 13315 | CD52      | 30.89654 | 1.076897 | 0.502353 | 2.143708 | 0.032056 | 0.063992 | 20.59928 | 27.918   | 11.1317  | 35.71403 | 42.78221 | 47.23404 |
| 20223 | PRKCQ     | 4.956772 | 1.076543 | 1.085396 | 0.991844 | 0.321274 | 0.422344 | 3.794605 | 2.189647 | 3.478657 | 6.696381 | 8.556443 | 5.024897 |
| 3153  | ZNF596    | 249.9241 | 1.076315 | 0.173191 | 6.214597 | 5.15E-10 | 4.34E-09 | 161.5417 | 163.6761 | 157.931  | 323.6584 | 337.9795 | 354.7578 |
| 19614 | LOC103231 | 6.761517 | 1.07614  | 0.993085 | 1.083633 | 0.278527 | 0.377519 | 6.505036 | 2.189647 | 4.174388 | 6.696381 | 14.97377 | 6.029877 |
| 6347  | LOC119621 | 156.8533 | 1.076036 | 0.268502 | 4.00755  | 6.14E-05 | 0.000257 | 75.35001 | 127.547  | 98.79385 | 196.4272 | 263.1106 | 179.8913 |
| 15826 | MYB       | 16.2377  | 1.075918 | 0.634865 | 1.694721 | 0.090128 | 0.151391 | 8.673382 | 10.40082 | 11.82743 | 26.78552 | 25.66933 | 14.06971 |
| 15246 | CHRM4     | 17.98524 | 1.0756   | 0.6012   | 1.789089 | 0.073601 | 0.12834  | 8.673382 | 12.04306 | 13.91463 | 20.08914 | 32.08666 | 21.10457 |
| 14076 | COL24A1   | 27.45932 | 1.075587 | 0.53828  | 1.998191 | 0.045696 | 0.086305 | 18.43094 | 16.96977 | 16.69755 | 37.94616 | 55.61688 | 19.09461 |
| 13935 | FLT4      | 32.54111 | 1.075576 | 0.531049 | 2.02538  | 0.042828 | 0.081707 | 14.63633 | 16.96977 | 30.61218 | 46.87467 | 62.03421 | 24.11951 |
| 1607  | EHD1      | 4310.841 | 1.075563 | 0.119998 | 8.963194 | 3.15E-19 | 5.21E-18 | 2794.455 | 2483.607 | 3050.782 | 5694.156 | 5249.378 | 6592.665 |
| 2535  | LOC103221 | 431.4383 | 1.074806 | 0.151935 | 7.074107 | 1.50E-12 | 1.58E-11 | 248.8176 | 305.4558 | 278.2925 | 613.8349 | 575.4208 | 566.8084 |
| 14353 | LOC103221 | 21.92587 | 1.074219 | 0.550567 | 1.951115 | 0.051043 | 0.094544 | 17.34676 | 14.78012 | 9.740239 | 33.4819  | 32.08666 | 24.11951 |
| 1498  | ZFYVE1    | 1638.857 | 1.073577 | 0.116045 | 9.251403 | 2.22E-20 | 3.93E-19 | 1086.883 | 1007.785 | 1077.688 | 2100.431 | 2059.964 | 2500.389 |
| 13392 | CCM2L     | 34.12292 | 1.073451 | 0.504159 | 2.129191 | 0.033238 | 0.065983 | 11.9259  | 22.9913  | 30.61218 | 53.57105 | 53.47777 | 32.15934 |
| 4714  | RAB27A    | 203.2031 | 1.073302 | 0.220164 | 4.875009 | 1.09E-06 | 6.14E-06 | 124.6799 | 148.896  | 121.0573 | 218.7484 | 280.2235 | 325.6133 |
| 6196  |           |          |          |          |          |          |          |          |          |          |          |          |          |



|       |           |          |          |          |          |          |          |          |          |          |          |          |          |
|-------|-----------|----------|----------|----------|----------|----------|----------|----------|----------|----------|----------|----------|----------|
| 1257  | SHARPIN   | 2325.71  | 1.072026 | 0.107387 | 9.982801 | 1.81E-23 | 3.83E-22 | 1479.896 | 1478.012 | 1543.828 | 3243.281 | 2804.374 | 3404.87  |
| 1785  | CDKN2C    | 850.9707 | 1.07177  | 0.126138 | 8.496779 | 1.95E-17 | 2.90E-16 | 516.0662 | 614.1961 | 515.5369 | 1156.242 | 1138.007 | 1165.776 |
| 18991 | LOC119620 | 8.963725 | 1.071767 | 0.903145 | 1.186705 | 0.235344 | 0.329458 | 7.589209 | 4.379295 | 4.87012  | 20.08914 | 12.83466 | 4.019918 |
| 6078  | LOC119620 | 234.9434 | 1.071691 | 0.259295 | 4.133089 | 3.58E-05 | 0.000157 | 170.7572 | 100.1764 | 185.7603 | 294.6408 | 267.3888 | 390.937  |
| 23075 | CUNH9orf1 | 1.824686 | 1.071569 | 1.94759  | 0.550202 | 0.582181 | 0.670738 | 0        | 2.737059 | 0.695731 | 2.232127 | 4.278221 | 1.004979 |
| 2214  | PGR       | 461.6442 | 1.071532 | 0.141385 | 7.578849 | 3.49E-14 | 4.19E-13 | 282.9691 | 321.3307 | 288.7285 | 633.9241 | 611.7857 | 631.1271 |
| 17061 | LOC119620 | 12.59559 | 1.071175 | 0.720886 | 1.485916 | 0.137301 | 0.213948 | 5.420864 | 9.306001 | 9.740239 | 22.32127 | 10.69555 | 18.08963 |
| 3336  | TAB2      | 2480.41  | 1.070425 | 0.178211 | 6.006493 | 1.90E-09 | 1.51E-08 | 1331.906 | 2197.858 | 1270.405 | 3267.834 | 3390.49  | 3423.965 |
| 1441  | YTHDF3    | 2968.549 | 1.069898 | 0.113825 | 9.399462 | 5.48E-21 | 1.01E-19 | 1790.511 | 2196.216 | 1760.896 | 3924.079 | 3965.911 | 4173.68  |
| 4645  | CUNH9orf1 | 163.6384 | 1.069583 | 0.217391 | 4.920088 | 8.65E-07 | 4.95E-06 | 95.94929 | 105.1031 | 114.7957 | 245.534  | 222.4675 | 197.981  |
| 22422 | LOC103230 | 2.097146 | 1.069318 | 1.638229 | 0.652728 | 0.513931 | 0.609351 | 1.084173 | 2.189647 | 0.695731 | 4.464254 | 2.139111 | 2.009959 |
| 20211 | USP50     | 6.033523 | 1.06912  | 1.074549 | 0.994948 | 0.319762 | 0.420606 | 1.626259 | 4.926706 | 4.87012  | 8.928508 | 12.83466 | 3.014938 |
| 17169 | LOC119620 | 11.80323 | 1.069112 | 0.726371 | 1.471854 | 0.14106  | 0.218422 | 8.673382 | 7.663765 | 6.261582 | 22.32127 | 12.83466 | 13.06473 |
| 5139  | LOC119620 | 197.2053 | 1.068824 | 0.23197  | 4.607589 | 4.07E-06 | 2.11E-05 | 105.1648 | 159.8442 | 117.5786 | 225.4448 | 288.7799 | 286.4191 |
| 1048  | GNS       | 13435.17 | 1.068204 | 0.099076 | 10.78166 | 4.20E-27 | 1.07E-25 | 8911.9   | 8719.723 | 8404.435 | 17379.34 | 16866.89 | 20328.72 |
| 22677 | LOC119620 | 2.336293 | 1.068186 | 1.750084 | 0.610362 | 0.541622 | 0.634821 | 1.626259 | 2.737059 | 0        | 2.232127 | 6.417332 | 1.004979 |
| 15107 | RTBDN     | 18.25945 | 1.068168 | 0.589319 | 1.812545 | 0.069902 | 0.123012 | 13.55216 | 8.758589 | 13.2189  | 20.08914 | 27.80844 | 26.12947 |
| 16914 | ANXA13    | 12.5582  | 1.067165 | 0.709538 | 1.504029 | 0.132574 | 0.208376 | 5.420864 | 10.40082 | 8.348776 | 17.85702 | 19.252   | 14.06971 |
| 23101 | LOC103240 | 1.552759 | 1.067007 | 1.959914 | 0.544415 | 0.586156 | 0.674557 | 0.542086 | 1.094824 | 1.391463 | 0        | 4.278221 | 2.009959 |
| 11003 | METTL27   | 45.14455 | 1.066667 | 0.405796 | 2.628577 | 0.008574 | 0.020717 | 27.10432 | 27.37059 | 32.69937 | 46.87467 | 85.56443 | 51.25395 |
| 24159 | LOC119620 | 1.039377 | 1.066416 | 2.797121 | 0.381255 | 0.703014 | 0.773634 | 0        | 0        | 2.087194 | 0        | 2.139111 | 2.009959 |
| 17862 | SERPINF1  | 13.11327 | 1.066401 | 0.779933 | 1.367297 | 0.171532 | 0.255301 | 5.96295  | 14.78012 | 4.174388 | 22.32127 | 21.39111 | 10.04979 |
| 18923 | CD200     | 7.844668 | 1.066294 | 0.888951 | 1.199498 | 0.230335 | 0.323564 | 4.336691 | 3.831883 | 6.957314 | 8.928508 | 14.97377 | 8.039836 |
| 2786  | HCN2      | 843.89   | 1.065773 | 0.158532 | 6.722752 | 1.78E-11 | 1.70E-10 | 607.1367 | 450.5199 | 582.3272 | 1145.081 | 981.8518 | 1296.424 |
| 15975 | BAALC     | 17.87196 | 1.065674 | 0.638438 | 1.669189 | 0.09508  | 0.158219 | 10.29964 | 9.853413 | 13.91463 | 29.01765 | 32.08666 | 12.05975 |
| 22894 | LOC119620 | 2.083418 | 1.065354 | 1.836496 | 0.580101 | 0.561846 | 0.652428 | 0        | 3.284471 | 0.695731 | 2.232127 | 4.278221 | 2.009959 |
| 19275 | KCNB1     | 8.407159 | 1.065237 | 0.934416 | 1.140003 | 0.254285 | 0.350722 | 2.168345 | 4.926706 | 9.044508 | 11.16063 | 17.11289 | 6.029877 |
| 4156  | FERMT3    | 410.896  | 1.06486  | 0.202713 | 5.253043 | 1.50E-07 | 9.57E-07 | 314.9522 | 187.7623 | 295.6858 | 560.2639 | 519.8039 | 586.908  |
| 1503  | MXRA8     | 1320.909 | 1.064454 | 0.115128 | 9.2458   | 2.33E-20 | 4.13E-19 | 885.7691 | 832.6134 | 848.7923 | 1796.862 | 1610.75  | 1950.665 |
| 14082 | LOC103230 | 24.8099  | 1.06338  | 0.532258 | 1.997864 | 0.045731 | 0.086335 | 10.84173 | 21.89647 | 15.30609 | 29.01765 | 40.6431  | 31.15436 |
| 22800 | TRNAI-GAL | 2.593024 | 1.062735 | 1.793475 | 0.592556 | 0.553478 | 0.64536  | 0        | 1.642235 | 3.478657 | 0        | 6.417332 | 4.019918 |
| 19520 | LOC103230 | 8.959344 | 1.06258  | 0.9679   | 1.09782  | 0.272283 | 0.370832 | 1.626259 | 7.116354 | 8.348776 | 13.39276 | 19.252   | 4.019918 |
| 2760  | CNIH3     | 362.0623 | 1.062484 | 0.157205 | 6.758602 | 1.39E-11 | 1.34E-10 | 235.8076 | 227.1759 | 242.8102 | 450.8897 | 477.0217 | 538.669  |
| 2061  | SOAHHC    | 681.6066 | 1.062292 | 0.134973 | 7.870418 | 3.53E-15 | 4.56E-14 | 446.1371 | 459.8259 | 420.9175 | 816.9585 | 934.7914 | 1011.009 |
| 12878 | GJC2      | 33.91403 | 1.061981 | 0.477791 | 2.222688 | 0.026237 | 0.054163 | 25.47806 | 15.32753 | 25.04633 | 31.24978 | 64.17332 | 42.20914 |
| 18808 | LOC119620 | 7.596101 | 1.061362 | 0.872539 | 1.216406 | 0.22383  | 0.316383 | 4.878777 | 4.926706 | 4.87012  | 11.16063 | 10.69555 | 9.044815 |
| 11133 | LOC119620 | 40.88247 | 1.06127  | 0.408858 | 2.595693 | 0.00944  | 0.022542 | 30.89892 | 20.25424 | 28.52499 | 60.26743 | 47.06043 | 58.28881 |
| 1192  | GULP1     | 3478.286 | 1.061017 | 0.10434  | 10.1688  | 2.73E-24 | 6.09E-23 | 2140.699 | 2435.435 | 2181.814 | 4685.235 | 5073.971 | 4352.566 |
| 18332 | FOX51     | 9.693185 | 1.060981 | 0.830235 | 1.277928 | 0.201275 | 0.291888 | 4.336691 | 6.568942 | 8.348776 | 13.39276 | 6.417332 | 19.09461 |
| 2492  | LMTK3     | 470.671  | 1.060882 | 0.148533 | 7.142392 | 9.17E-13 | 9.78E-12 | 300.8579 | 279.7274 | 333.9511 | 691.9594 | 607.5074 | 610.0225 |
| 17679 | LOC119620 | 12.63248 | 1.060512 | 0.763358 | 1.389273 | 0.16475  | 0.247744 | 8.131296 | 10.94824 | 4.87012  | 24.5534  | 19.252   | 8.039836 |
| 22565 | LOC103240 | 2.082531 | 1.060329 | 1.681953 | 0.630415 | 0.528423 | 0.622563 | 0.542086 | 2.737059 | 0.695731 | 2.232127 | 4.278221 | 2.009959 |
| 4052  | PFN4      | 191.2914 | 1.060163 | 0.198866 | 5.331043 | 9.77E-08 | 6.41E-07 | 122.5115 | 126.4521 | 124.5359 | 232.1412 | 256.6933 | 285.4142 |
| 2682  | APC2      | 857.1152 | 1.059999 | 0.1546   | 6.856392 | 7.06E-12 | 7.00E-11 | 574.6116 | 462.0156 | 633.1155 | 1207.581 | 1001.104 | 1264.264 |
| 1993  | YADAM     | 1205.485 | 1.059989 | 0.13235  | 8.008988 | 1.16E-15 | 1.54E-14 | 699.2914 | 910.3458 | 736.0838 | 1540.168 | 1638.559 | 1708.465 |
| 1275  | PCYOX1    | 6372.431 | 1.05896  | 0.106757 | 9.919373 | 3.43E-23 | 7.15E-22 | 4026.075 | 4607.565 | 3768.777 | 8348.155 | 8229.159 | 9254.856 |
| 5529  | LOC119620 | 119.1126 | 1.058779 | 0.240613 | 4.400345 | 1.08E-05 | 5.20E-05 | 85.10756 | 74.99542 | 71.66033 | 162.9453 | 156.1551 | 163.8117 |
| 14659 | LOC103210 | 22.92751 | 1.057714 | 0.557899 | 1.895889 | 0.057975 | 0.10514  | 13.01007 | 19.70683 | 11.82743 | 20.08914 | 42.78221 | 30.14938 |
| 19954 | CDH22     | 7.599285 | 1.057279 | 1.019439 | 1.037118 | 0.299681 | 0.399269 | 2.710432 | 8.211177 | 3.478657 | 8.928508 | 19.252   | 3.014938 |
| 1319  | ACSL4     | 10116.28 | 1.056773 | 0.107814 | 9.801833 | 1.11E-22 | 2.23E-21 | 6157.559 | 7559.757 | 5986.768 | 13633.83 | 13752.34 | 13607.42 |
| 1931  | LOC103230 | 1635.758 | 1.056718 | 0.129944 | 8.132085 | 4.22E-16 | 5.81E-15 | 1190.422 | 920.7467 | 1078.384 | 2162.931 | 2030.016 | 2432.05  |
| 22598 | LOC119620 | 2.32221  | 1.056499 | 1.691238 | 0.62469  | 0.532175 | 0.626067 | 2.710432 | 1.094824 | 0.695731 | 0        | 6.417332 | 3.014938 |
| 14000 | LOC119620 | 23.49413 | 1.056199 | 0.525123 | 2.011335 | 0.04429  | 0.084069 | 18.97302 | 13.6853  | 13.2189  | 24.5534  | 36.36488 | 34.1693  |
| 1286  | SHPRH     | 1894.719 | 1.056102 | 0.106736 | 9.894497 | 4.40E-23 | 9.09E-22 | 1214.273 | 1345.538 | 1131.955 | 2571.41  | 2494.203 | 2610.937 |
| 14827 | KRT17     | 22.02362 | 1.056074 | 0.565577 | 1.86725  | 0.061867 | 0.110928 | 13.01007 | 15.32753 | 13.91463 | 29.01765 | 42.78221 | 18.08963 |
| 6626  | CYP3A166  | 93.60413 | 1.056042 | 0.271392 | 3.891203 | 9.97E-05 | 0.0004   | 65.59245 | 55.28859 | 61.92009 | 133.9276 | 111.2338 | 133.6623 |
| 20493 | LOC103220 | 8.575307 | 1.055455 | 1.113201 | 0.948126 | 0.343065 | 0.445049 | 6.505036 | 7.116354 | 2.782925 | 29.01765 | 0        | 6.029877 |
| 27039 | TRNAR-UC  | 0.541296 | 1.055073 | 3.520958 | 0.299655 | 0.76444  | NA       | 0.542086 | 0        | 0.695731 | 0        | 0        | 2.009959 |
| 20963 | LOC119620 | 4.209011 | 1.055065 | 1.193508 | 0.884004 | 0.376694 | 0.477707 | 2.710432 | 2.189647 | 3.478657 | 6.696381 | 2.139111 | 8.039836 |
| 1135  | SYNJ2     | 5254.836 | 1.054105 | 0.101583 | 10.37676 | 3.16E-25 | 7.41E-24 | 3277.996 | 3772.762 | 3199.669 | 7053.521 | 6751.033 | 7474.032 |
| 14186 | LOC103220 | 35.53242 | 1.054027 | 0.532483 | 1.979455 | 0.047765 | 0.089513 | 37.40396 | 13.6853  | 18.08902 | 66.96381 | 27.80844 | 49.24399 |
| 2627  | MMP19     | 409.3427 | 1.053469 | 0.151919 | 6.934425 | 4.08E-12 | 4.13E-11 | 262.3698 | 283.5593 | 254.6377 | 517.8535 | 532.6386 | 604.9976 |
| 16264 | LOC103230 | 15.71503 | 1.053303 | 0.652327 | 1.614685 | 0.106379 | 0.173886 | 13.01007 | 10.94824 | 6.261582 | 22.32127 | 25.66933 | 16.07967 |
| 20785 | LOC103220 | 4.950486 | 1.052992 | 1.16156  | 0.906532 | 0.364654 | 0.466388 | 3.794605 | 1.642235 | 4.174388 | 2.232127 | 12.83466 | 5.024897 |
| 3949  | TCF7      | 264.8203 | 1.052466 | 0.194565 | 5.40934  | 6.33E-08 | 4.26E-07 | 146.9054 | 205.8268 | 164.1926 | 332.5869 | 378.6226 | 360.7876 |
| 22317 | LOC119610 | 2.904286 | 1.05246  | 1.565519 | 0.672275 | 0.501408 | 0.597273 | 0        | 2.189647 | 3.478657 | 4.464254 | 4.278221 | 3.014938 |
| 2167  | IL27RA    | 1352.084 | 1.051873 | 0.137256 | 7.6636   | 1.81E-14 | 2.22E-13 | 995.2706 | 756.5231 | 891.2319 | 1772.309 | 1662.089 | 2035.083 |
| 23517 | FCGR1A    | 1.603514 | 1.051751 | 2.188882 | 0.480497 | 0.630874 | 0.713147 | 1.626259 | 0        | 1.391463 | 4.464254 | 2.139111 | 0        |
| 18141 | LOC119620 | 10.8262  | 1.051625 | 0.80015  | 1.314284 | 0.18875  | 0.276602 | 4.336691 | 5.474118 | 11.1317  | 17.85702 | 17.11289 | 9.044815 |
| 4848  | TMEM145   | 155.7585 | 1.051408 | 0.219841 | 4.782585 | 1.73E-06 | 9.49E-06 | 97.03346 | 111.     |          |          |          |          |



|       |           |          |          |          |          |          |          |          |          |          |          |          |          |
|-------|-----------|----------|----------|----------|----------|----------|----------|----------|----------|----------|----------|----------|----------|
| 17068 | LOC103231 | 12.34996 | 1.050505 | 0.707461 | 1.484895 | 0.137572 | 0.214288 | 5.96295  | 9.306001 | 9.044508 | 17.85702 | 12.83466 | 19.09461 |
| 1181  | LOC119621 | 1719.398 | 1.050133 | 0.102742 | 10.22111 | 1.60E-24 | 3.59E-23 | 1175.243 | 1116.173 | 1067.948 | 2194.181 | 2434.308 | 2328.537 |
| 20159 | LOC119621 | 6.303433 | 1.049976 | 1.047963 | 1.001921 | 0.316382 | 0.417234 | 4.336691 | 1.094824 | 6.957314 | 6.696381 | 10.69555 | 8.039836 |
| 8257  | LOC119618 | 77.1901  | 1.049888 | 0.315572 | 3.326942 | 0.000878 | 0.002827 | 60.71367 | 37.224   | 52.87558 | 107.1421 | 102.6773 | 102.5079 |
| 26849 | LOC119621 | 0.542184 | 1.049707 | 3.519114 | 0.298287 | 0.765484 | NA       | 0        | 0.547412 | 0.695731 | 0        | 0        | 2.009959 |
| 21508 | LOC119621 | 3.68782  | 1.04904  | 1.307232 | 0.80249  | 0.42227  | 0.521947 | 1.084173 | 3.831883 | 2.087194 | 6.696381 | 6.417332 | 2.009959 |
| 1205  | RHOBTB2   | 2407.245 | 1.048899 | 0.103531 | 10.13126 | 4.01E-24 | 8.86E-23 | 1493.99  | 1700.261 | 1514.607 | 3189.709 | 3103.85  | 3441.05  |
| 2420  | ROGDI     | 490.1162 | 1.048798 | 0.144811 | 7.242553 | 4.40E-13 | 4.84E-12 | 314.4101 | 343.2272 | 302.6431 | 613.8349 | 646.0114 | 720.5703 |
| 16229 | HHIPL1    | 25.18577 | 1.048196 | 0.646406 | 1.621575 | 0.104894 | 0.171835 | 19.51511 | 8.758589 | 20.17621 | 42.41041 | 49.19955 | 11.05477 |
| 19069 | CA4       | 9.000099 | 1.048164 | 0.892501 | 1.174412 | 0.24023  | 0.334916 | 3.252518 | 4.379295 | 9.740239 | 15.62489 | 14.97377 | 6.029877 |
| 21936 | TRNAC-GC  | 3.482151 | 1.047968 | 1.42027  | 0.737865 | 0.460596 | 0.558213 | 2.710432 | 1.094824 | 2.782925 | 11.16063 | 2.139111 | 1.004979 |
| 6458  | FLT3LG    | 116.527  | 1.047679 | 0.26475  | 3.957235 | 7.58E-05 | 0.000312 | 61.79785 | 73.90059 | 91.83654 | 162.9453 | 168.9897 | 139.6921 |
| 15177 | STAP2     | 21.9801  | 1.047498 | 0.581659 | 1.80088  | 0.071722 | 0.125639 | 14.09425 | 9.853413 | 18.78475 | 44.64254 | 21.39111 | 23.11453 |
| 16850 | DEFB110   | 14.18752 | 1.04679  | 0.690801 | 1.515327 | 0.12969  | 0.204617 | 14.09425 | 7.116354 | 6.261582 | 22.32127 | 19.252   | 16.07967 |
| 1464  | BCL9L     | 2783.372 | 1.046709 | 0.112108 | 9.336591 | 9.95E-21 | 1.81E-19 | 1669.626 | 2045.131 | 1734.458 | 3718.724 | 3561.619 | 3970.674 |
| 15209 | GFI1      | 24.07323 | 1.046562 | 0.583066 | 1.794928 | 0.072665 | 0.127017 | 9.215468 | 13.6853  | 24.3506  | 44.64254 | 21.39111 | 31.15436 |
| 17308 | SLC26A9   | 14.24409 | 1.04619  | 0.722714 | 1.447586 | 0.147733 | 0.226917 | 4.878777 | 14.23271 | 8.348776 | 24.5534  | 21.39111 | 12.05975 |
| 1346  | CHMP7     | 1970.158 | 1.045907 | 0.107523 | 9.72728  | 2.31E-22 | 4.56E-21 | 1312.391 | 1323.094 | 1224.487 | 2694.177 | 2408.639 | 2858.162 |
| 1489  | CYHR1     | 2834.36  | 1.045736 | 0.112743 | 9.275362 | 1.77E-20 | 3.16E-19 | 1875.619 | 1724.347 | 1955.005 | 3738.813 | 3448.246 | 4264.128 |
| 21828 | LOC103231 | 3.405892 | 1.044803 | 1.382092 | 0.755958 | 0.449675 | 0.547742 | 2.168345 | 0.547412 | 4.174388 | 2.232127 | 4.278221 | 7.034856 |
| 2557  | RNASL     | 506.5882 | 1.044735 | 0.148487 | 7.035874 | 1.98E-12 | 2.06E-11 | 312.7838 | 373.3349 | 307.5133 | 660.7096 | 654.5679 | 730.6201 |
| 3996  | SH3RF2    | 236.852  | 1.0447   | 0.194278 | 5.377345 | 7.56E-08 | 5.03E-07 | 143.1108 | 179.5511 | 139.842  | 332.5869 | 331.5622 | 294.459  |
| 17929 | LOC103211 | 19.22241 | 1.04385  | 0.770283 | 1.355153 | 0.175369 | 0.260036 | 14.63633 | 7.663765 | 14.61036 | 40.17829 | 34.22577 | 4.019918 |
| 2878  | TSTD1     | 887.0594 | 1.04379  | 0.158655 | 6.578974 | 4.74E-11 | 4.38E-10 | 657.5508 | 447.7829 | 633.1155 | 1151.778 | 1266.354 | 1165.776 |
| 14144 | LOC119621 | 23.68994 | 1.04364  | 0.525325 | 1.986658 | 0.04696  | 0.088266 | 15.17842 | 15.32753 | 15.30609 | 35.71403 | 38.50399 | 22.10955 |
| 15294 | LOC103241 | 17.57181 | 1.042844 | 0.585872 | 1.779988 | 0.075078 | 0.130505 | 12.46799 | 10.94824 | 11.1317  | 20.08914 | 25.66933 | 25.12449 |
| 12114 | LOC103211 | 38.6251  | 1.042716 | 0.437513 | 2.383278 | 0.017159 | 0.037657 | 19.51511 | 21.34906 | 35.4823  | 44.64254 | 53.47777 | 57.28383 |
| 13950 | LOC103231 | 28.94446 | 1.042475 | 0.515563 | 2.022015 | 0.043175 | 0.08228  | 20.59928 | 10.94824 | 25.04633 | 35.71403 | 49.19955 | 32.15934 |
| 9480  | LOC119621 | 83.98539 | 1.042371 | 0.348668 | 2.989584 | 0.002794 | 0.007834 | 75.35001 | 43.24553 | 45.22254 | 93.74933 | 151.8769 | 94.46807 |
| 20278 | DLX2      | 5.47989  | 1.041953 | 1.059757 | 0.9832   | 0.325509 | 0.426751 | 3.252518 | 5.474118 | 2.087194 | 4.464254 | 8.556443 | 9.044815 |
| 1620  | DGKG      | 1497.392 | 1.04187  | 0.116744 | 8.924369 | 4.48E-19 | 7.36E-18 | 932.3886 | 1098.656 | 906.538  | 2042.396 | 1923.06  | 2081.312 |
| 1882  | ZFP41     | 690.8471 | 1.041862 | 0.12662  | 8.228277 | 1.90E-16 | 2.68E-15 | 440.1741 | 449.4251 | 466.14   | 993.2965 | 851.366  | 944.6807 |
| 20519 | LOC103211 | 5.563427 | 1.041798 | 1.105204 | 0.94263  | 0.34587  | 0.447515 | 3.252518 | 5.474118 | 2.087194 | 13.39276 | 2.139111 | 7.034856 |
| 6118  | DNAJC22   | 128.3203 | 1.041686 | 0.253392 | 4.110961 | 3.94E-05 | 0.000171 | 92.69677 | 67.33165 | 91.14081 | 165.1774 | 196.7982 | 156.7768 |
| 16358 | LOC119621 | 18.32529 | 1.04121  | 0.652722 | 1.595182 | 0.110671 | 0.179863 | 13.55216 | 15.87494 | 6.957314 | 24.5534  | 12.83466 | 36.17926 |
| 1295  | HMGA2     | 1661.155 | 1.041166 | 0.105472 | 9.87145  | 5.54E-23 | 1.14E-21 | 1100.977 | 1138.617 | 1018.551 | 2129.449 | 2374.413 | 2204.925 |
| 19731 | LOC119624 | 9.438629 | 1.040796 | 0.978369 | 1.063807 | 0.287416 | 0.387257 | 2.168345 | 7.116354 | 9.044508 | 4.464254 | 27.80844 | 6.029877 |
| 22966 | LOC103221 | 2.614549 | 1.040408 | 1.828429 | 0.569017 | 0.569344 | 0.659062 | 0        | 1.642235 | 3.478657 | 0        | 8.556443 | 2.009959 |
| 2082  | SLC27A1   | 785.7456 | 1.040153 | 0.132943 | 7.824029 | 5.12E-15 | 6.53E-14 | 487.8777 | 476.2483 | 580.9357 | 1055.796 | 1001.104 | 1112.512 |
| 14346 | LOC119618 | 25.01293 | 1.040051 | 0.532482 | 1.953212 | 0.050795 | 0.094129 | 16.80468 | 14.23271 | 17.39328 | 33.4819  | 47.06043 | 21.10457 |
| 20314 | C2CD4D    | 6.082085 | 1.039288 | 1.065043 | 0.975818 | 0.329155 | 0.430766 | 2.168345 | 3.284471 | 6.261582 | 8.928508 | 12.83466 | 3.014938 |
| 19049 | CUNH19or  | 9.537845 | 1.039233 | 0.882573 | 1.177504 | 0.238995 | 0.333526 | 5.96295  | 2.189647 | 10.43597 | 15.62489 | 14.97377 | 8.039836 |
| 1645  | PCBP4     | 1574.237 | 1.038766 | 0.117166 | 8.865742 | 7.60E-19 | 1.23E-17 | 1075.499 | 932.7897 | 1088.124 | 2051.325 | 1987.234 | 2310.448 |
| 14447 | NANOS3    | 25.30611 | 1.0385   | 0.536745 | 1.93481  | 0.053014 | 0.097554 | 14.09425 | 10.94824 | 25.04633 | 33.4819  | 32.08666 | 36.17926 |
| 17440 | LOC119611 | 13.19577 | 1.03825  | 0.731185 | 1.419955 | 0.155621 | 0.237224 | 9.215468 | 7.116354 | 9.044508 | 20.08914 | 25.66933 | 8.039836 |
| 4085  | LOC103221 | 243.2469 | 1.037463 | 0.19548  | 5.307259 | 1.11E-07 | 7.24E-07 | 136.0637 | 184.4778 | 157.2353 | 308.0335 | 355.0924 | 318.5785 |
| 1850  | HOOK3     | 926.5159 | 1.037067 | 0.125008 | 8.296008 | 1.08E-16 | 1.55E-15 | 569.1907 | 668.9372 | 583.0229 | 1167.402 | 1328.388 | 1242.155 |
| 1540  | SPRYD3    | 2099.675 | 1.037064 | 0.11371  | 9.120251 | 7.50E-20 | 1.29E-18 | 1408.882 | 1470.348 | 1251.621 | 2691.945 | 2673.888 | 3101.367 |
| 2667  | DPP4      | 749.1107 | 1.037058 | 0.150813 | 6.876452 | 6.14E-12 | 6.12E-11 | 461.3155 | 587.3729 | 424.3961 | 966.511  | 996.8256 | 1058.243 |
| 15718 | LYMNTD1   | 18.16672 | 1.036882 | 0.604558 | 1.715108 | 0.086325 | 0.146009 | 9.215468 | 14.23271 | 11.82743 | 24.5534  | 32.08666 | 17.08465 |
| 843   | CYBRD1    | 6380.188 | 1.036686 | 0.087757 | 11.81319 | 3.34E-32 | 1.05E-30 | 4157.26  | 4353.566 | 4037.329 | 8366.012 | 8321.14  | 9045.82  |
| 5466  | DBNDD1    | 147.54   | 1.036349 | 0.233852 | 4.431648 | 9.35E-06 | 4.55E-05 | 98.65972 | 90.32295 | 102.9682 | 196.4272 | 164.7115 | 232.1503 |
| 1175  | SNTB1     | 2354.586 | 1.036205 | 0.101047 | 10.2547  | 1.13E-24 | 2.55E-23 | 1529.768 | 1655.373 | 1447.121 | 3035.693 | 3155.188 | 3304.372 |
| 1314  | LOC103221 | 2551.723 | 1.035967 | 0.105602 | 9.810089 | 1.02E-22 | 2.06E-21 | 1769.37  | 1588.589 | 1665.581 | 3278.995 | 3247.17  | 3760.633 |
| 21847 | LOC119621 | 3.645926 | 1.035692 | 1.375179 | 0.753133 | 0.45137  | 0.54926  | 2.168345 | 1.642235 | 3.478657 | 0        | 8.556443 | 6.029877 |
| 875   | NPTN      | 6886.419 | 1.035281 | 0.088864 | 11.65018 | 2.29E-31 | 6.96E-30 | 4659.774 | 4528.738 | 4364.323 | 9120.471 | 8802.44  | 9842.769 |
| 18998 | NHLH1     | 8.480718 | 1.034817 | 0.87277  | 1.18567  | 0.235753 | 0.329902 | 6.505036 | 4.926706 | 4.87012  | 17.85702 | 10.69555 | 6.029877 |
| 6572  | EGR2      | 123.4589 | 1.034557 | 0.264487 | 3.911567 | 9.17E-05 | 0.000371 | 71.5554  | 100.7238 | 69.57314 | 189.7308 | 160.4333 | 148.737  |
| 1957  | KCTD9     | 2414.686 | 1.034331 | 0.128116 | 8.073399 | 6.84E-16 | 9.29E-15 | 1419.182 | 1888.571 | 1445.73  | 3129.442 | 3253.587 | 3351.607 |
| 23874 | LOC119621 | 1.572509 | 1.034327 | 2.425139 | 0.426502 | 0.669742 | 0.745794 | 1.626259 | 0        | 1.391463 | 0        | 6.417332 | 0        |
| 12447 | KCNH2     | 72.66747 | 1.034206 | 0.447438 | 2.311397 | 0.020811 | 0.044449 | 34.69353 | 46.53    | 60.52863 | 93.74933 | 158.2942 | 42.20914 |
| 2460  | SMIM10L2  | 496.9297 | 1.033344 | 0.14388  | 7.182008 | 6.87E-13 | 7.42E-12 | 342.0565 | 309.8351 | 328.3852 | 691.9594 | 596.8119 | 712.5304 |
| 2072  | FICD      | 546.8462 | 1.033333 | 0.131667 | 7.848111 | 4.22E-15 | 5.42E-14 | 368.0766 | 338.3005 | 371.5206 | 718.7449 | 733.715  | 750.7197 |
| 17457 | LOC119621 | 11.589   | 1.032711 | 0.728372 | 1.417833 | 0.156239 | 0.237935 | 5.96295  | 7.116354 | 9.740239 | 13.39276 | 19.252   | 14.06971 |
| 14557 | SH2D3C    | 22.34394 | 1.032403 | 0.53922  | 1.914623 | 0.055541 | 0.101432 | 12.46799 | 14.23271 | 17.39328 | 22.32127 | 38.50399 | 29.1444  |
| 11037 | LOC103221 | 49.74653 | 1.031689 | 0.393617 | 2.621045 | 0.008766 | 0.021117 | 40.11439 | 24.08612 | 33.39511 | 58.0353  | 85.56443 | 57.28383 |
| 1147  | KRT18     | 5388.869 | 1.030984 | 0.099873 | 10.32293 | 5.55E-25 | 1.29E-23 | 3656.915 | 3482.634 | 3489.789 | 7055.753 | 6650.495 | 7997.627 |
| 24281 | LOC119621 | 1.076405 | 1.030927 | 2.825296 | 0.364892 | 0.715192 | 0.783056 | 0        | 0        | 2.087194 | 2.232127 | 2.139111 | 0        |
| 8791  | CORO1A    | 62.55422 | 1.03004  | 0.324326 | 3.175941 | 0.001494 | 0.004517 | 41.74065 | 36.12918 | 45.22254 | 89.28508 | 85.56443 | 77.38342 |
| 5949  | RNF207    | 150.3814 | 1.030039 | 0.246089 | 4.185637 | 2.84E-05 | 0.000127 | 113.8381 | 83.75401 | 98.09812 | 178.5702 | 248.1368 | 179.8913 |



|       |           |          |          |          |          |          |          |          |          |          |          |          |          |
|-------|-----------|----------|----------|----------|----------|----------|----------|----------|----------|----------|----------|----------|----------|
| 13782 | MAMDC4    | 25.34427 | 1.028204 | 0.501375 | 2.050766 | 0.04029  | 0.077718 | 20.0572  | 13.6853  | 16.00182 | 37.94616 | 34.22577 | 30.14938 |
| 13368 | LOC119621 | 31.14153 | 1.027809 | 0.481903 | 2.132811 | 0.03294  | 0.065508 | 20.0572  | 15.32753 | 25.74206 | 37.94616 | 55.61688 | 32.15934 |
| 18012 | TLCD3B    | 17.30399 | 1.02688  | 0.765683 | 1.341128 | 0.179879 | 0.265488 | 9.757555 | 2.737059 | 21.56767 | 29.01765 | 25.66933 | 15.07469 |
| 13833 | LOC103241 | 28.2838  | 1.026812 | 0.502535 | 2.043265 | 0.041026 | 0.078841 | 18.97302 | 18.612   | 17.39328 | 42.41041 | 49.19955 | 23.11453 |
| 13843 | LOC103221 | 25.77157 | 1.026494 | 0.502825 | 2.041452 | 0.041206 | 0.07914  | 14.63633 | 20.25424 | 16.00182 | 26.78552 | 42.78221 | 34.1693  |
| 19154 | LOC119621 | 9.827911 | 1.026381 | 0.885059 | 1.159675 | 0.246181 | 0.34169  | 8.673382 | 1.642235 | 9.044508 | 17.85702 | 10.69555 | 11.05477 |
| 9562  | ROM1      | 63.69038 | 1.026329 | 0.34571  | 2.968756 | 0.00299  | 0.008313 | 47.7036  | 48.71965 | 29.22072 | 80.35657 | 87.70354 | 88.43819 |
| 3372  | ATP1A3    | 313.2519 | 1.026294 | 0.172031 | 5.965747 | 2.44E-09 | 1.92E-08 | 185.9356 | 229.3656 | 205.2408 | 399.5507 | 402.1528 | 457.2657 |
| 2450  | SLCO2A1   | 767.4566 | 1.026254 | 0.142586 | 7.197443 | 6.14E-13 | 6.66E-12 | 460.2313 | 587.3729 | 470.3144 | 991.0644 | 988.2691 | 1107.487 |
| 2008  | RAB13     | 4210.481 | 1.026168 | 0.1289   | 7.960994 | 1.71E-15 | 2.26E-14 | 2540.217 | 3351.803 | 2427.407 | 5462.015 | 5668.643 | 5812.801 |
| 11958 | SLC7A7    | 48.56411 | 1.025981 | 0.425194 | 2.41297  | 0.015823 | 0.035178 | 21.68345 | 31.74989 | 41.74388 | 78.12444 | 74.86887 | 43.21412 |
| 17863 | LOC103211 | 10.79019 | 1.025899 | 0.750363 | 1.367204 | 0.171561 | 0.25533  | 7.589209 | 6.02153  | 7.653045 | 11.16063 | 19.252   | 13.06473 |
| 17724 | LOC119611 | 11.34652 | 1.025806 | 0.743331 | 1.380012 | 0.167583 | 0.251365 | 7.589209 | 9.853413 | 4.87012  | 17.85702 | 12.83466 | 15.07469 |
| 1226  | WASHC5    | 6880.945 | 1.025695 | 0.101788 | 10.07681 | 7.00E-24 | 1.52E-22 | 4419.088 | 5046.042 | 4134.732 | 9078.06  | 9014.212 | 9593.534 |
| 2957  | LOC119621 | 1529.848 | 1.024964 | 0.158118 | 6.482292 | 9.03E-11 | 8.12E-10 | 770.8468 | 1215.802 | 1036.64  | 2209.806 | 2021.46  | 1924.536 |
| 14035 | LOC119621 | 25.60406 | 1.024631 | 0.510544 | 2.006939 | 0.044756 | 0.084771 | 21.14137 | 13.6853  | 15.30609 | 35.71403 | 40.6431  | 27.13445 |
| 22795 | LOC119611 | 1.863134 | 1.024382 | 1.725676 | 0.593612 | 0.552772 | 0.644678 | 1.084173 | 1.094824 | 1.391463 | 4.464254 | 2.139111 | 1.004979 |
| 16082 | LOC103241 | 16.84002 | 1.024275 | 0.620479 | 1.65078  | 0.098783 | 0.163298 | 9.757555 | 10.94824 | 12.52316 | 15.62489 | 32.08666 | 20.09959 |
| 1137  | TNS1      | 6733.688 | 1.024083 | 0.098773 | 10.36809 | 3.46E-25 | 8.10E-24 | 4197.375 | 4788.759 | 4335.798 | 8812.437 | 8526.495 | 9741.266 |
| 19103 | LOC119621 | 8.443488 | 1.02365  | 0.87516  | 1.169672 | 0.242133 | 0.336989 | 7.589209 | 6.02153  | 2.782925 | 13.39276 | 12.83466 | 8.039836 |
| 15665 | PTX4      | 22.2315  | 1.02308  | 0.593892 | 1.722671 | 0.084948 | 0.144165 | 14.63633 | 7.116354 | 22.2634  | 29.01765 | 34.22577 | 26.12947 |
| 2201  | LOC119621 | 1202.652 | 1.022512 | 0.134491 | 7.602822 | 2.90E-14 | 3.50E-13 | 870.0486 | 694.6656 | 818.8758 | 1618.292 | 1433.204 | 1780.824 |
| 15736 | CASP10    | 18.57865 | 1.022277 | 0.596985 | 1.7124   | 0.086823 | 0.146682 | 10.29964 | 9.853413 | 16.69755 | 31.24978 | 19.252   | 24.11951 |
| 12412 | CFAP91    | 34.81505 | 1.022238 | 0.440992 | 2.31804  | 0.020447 | 0.034795 | 20.59928 | 23.53871 | 24.3506  | 40.17829 | 62.03421 | 38.18922 |
| 16070 | LOC103221 | 19.3346  | 1.021552 | 0.618133 | 1.652642 | 0.098404 | 0.162762 | 14.63633 | 10.40082 | 12.52316 | 29.01765 | 36.36488 | 13.06473 |
| 20281 | LOC119621 | 6.125728 | 1.021465 | 1.039684 | 0.982476 | 0.325865 | 0.427155 | 4.878777 | 2.737059 | 4.174388 | 13.39276 | 8.556443 | 3.014938 |
| 1934  | PHF20L1   | 5516.718 | 1.021373 | 0.125641 | 8.129281 | 4.32E-16 | 5.94E-15 | 3274.744 | 4353.019 | 3298.462 | 7095.932 | 7198.107 | 7880.044 |
| 2538  | CIB1      | 3935.924 | 1.021293 | 0.144492 | 7.068158 | 1.57E-12 | 1.64E-11 | 3002.074 | 2059.911 | 2736.311 | 4984.34  | 4864.338 | 5968.573 |
| 15248 | LOC103231 | 18.7623  | 1.020529 | 0.570454 | 1.788976 | 0.073619 | 0.128355 | 13.55216 | 11.49565 | 11.82743 | 26.78552 | 27.80844 | 21.10457 |
| 17685 | LOC103241 | 15.08674 | 1.020321 | 0.73526  | 1.387701 | 0.165228 | 0.248379 | 3.794605 | 15.32753 | 10.43597 | 20.08914 | 27.80844 | 13.06473 |
| 986   | MRPL13    | 3149.015 | 1.020087 | 0.09219  | 11.06509 | 1.85E-28 | 5.00E-27 | 2133.652 | 1961.377 | 2144.94  | 4343.719 | 4098.536 | 4211.869 |
| 18413 | LOC103221 | 11.11056 | 1.020074 | 0.807581 | 1.263124 | 0.206545 | 0.298213 | 4.878777 | 12.59047 | 4.174388 | 17.85702 | 17.11289 | 10.04979 |
| 922   | MLF1      | 3137.664 | 1.019993 | 0.0896   | 11.38386 | 5.03E-30 | 1.45E-28 | 2058.844 | 2029.256 | 2126.851 | 4292.38  | 4301.752 | 4016.903 |
| 18273 | SLC6A11   | 13.55929 | 1.019367 | 0.790636 | 1.2893   | 0.197294 | 0.287039 | 6.505036 | 12.04306 | 7.653045 | 22.32127 | 27.80844 | 5.024897 |
| 14321 | LOC119621 | 26.7787  | 1.018688 | 0.520308 | 1.957855 | 0.050247 | 0.093283 | 19.51511 | 15.32753 | 17.39328 | 42.41041 | 44.92132 | 21.10457 |
| 21054 | LOC119621 | 4.793253 | 1.018094 | 1.167221 | 0.872237 | 0.383079 | 0.483716 | 3.252518 | 3.831883 | 2.087194 | 11.16063 | 6.417332 | 2.009959 |
| 15287 | LAG3      | 22.30844 | 1.017513 | 0.570925 | 1.782217 | 0.074714 | 0.129938 | 15.7205  | 9.306001 | 18.78475 | 35.71403 | 34.22577 | 20.09959 |
| 1958  | MAPRE2    | 975.9606 | 1.017468 | 0.126038 | 8.07272  | 6.87E-16 | 9.33E-15 | 602.8    | 720.9414 | 614.3308 | 1274.545 | 1249.241 | 1393.907 |
| 18826 | LOC119621 | 9.996174 | 1.01738  | 0.837709 | 1.21448  | 0.224565 | 0.317117 | 4.336691 | 10.40082 | 4.87012  | 8.928508 | 21.39111 | 10.04979 |
| 16040 | LOC119621 | 20.41704 | 1.017021 | 0.613422 | 1.657947 | 0.097328 | 0.161306 | 15.7205  | 14.78012 | 10.43597 | 11.16063 | 34.22577 | 36.17926 |
| 14480 | LOC119621 | 24.62514 | 1.016685 | 0.52701  | 1.929156 | 0.053712 | 0.098613 | 15.17842 | 16.96977 | 16.00182 | 35.71403 | 42.78221 | 21.10457 |
| 17540 | MYRFL     | 14.2751  | 1.016002 | 0.720533 | 1.410069 | 0.158519 | 0.240264 | 6.505036 | 10.94824 | 10.43597 | 15.62489 | 32.08666 | 10.04979 |
| 20635 | LOC119621 | 5.278469 | 1.015757 | 1.092128 | 0.930071 | 0.352334 | 0.453935 | 5.96295  | 1.642235 | 2.782925 | 6.696381 | 8.556443 | 6.029877 |
| 2100  | IRAK2     | 727.971  | 1.014999 | 0.130211 | 7.79503  | 6.44E-15 | 8.15E-14 | 510.6454 | 452.7096 | 485.6205 | 926.3327 | 926.2349 | 1066.283 |
| 16174 | LOC119621 | 17.80586 | 1.014289 | 0.621632 | 1.631654 | 0.102752 | 0.168893 | 10.84173 | 12.04306 | 11.82743 | 31.24978 | 27.80844 | 13.06473 |
| 2360  | IQSEC2    | 497.0576 | 1.014029 | 0.138415 | 7.326016 | 2.37E-13 | 2.67E-12 | 313.3259 | 322.973  | 351.3443 | 642.8526 | 701.6283 | 650.2217 |
| 4350  | KKR6      | 209.9427 | 1.01384  | 0.198061 | 5.118828 | 3.07E-07 | 1.88E-06 | 134.9795 | 126.9995 | 154.4524 | 276.7837 | 310.171  | 256.2698 |
| 20755 | LOC103211 | 5.04234  | 1.013569 | 1.113069 | 0.910607 | 0.362503 | 0.464437 | 1.626259 | 5.474118 | 2.782925 | 8.928508 | 6.417332 | 5.024897 |
| 9656  | LOC103221 | 72.77118 | 1.013071 | 0.344    | 2.94497  | 0.00323  | 0.008892 | 54.20864 | 31.20247 | 59.8329  | 93.74933 | 94.12087 | 103.5129 |
| 24556 | LOC119621 | 1.060903 | 1.012889 | 3.140946 | 0.322479 | 0.74709  | 0.80882  | 0        | 0        | 2.087194 | 0        | 4.278221 | 0        |
| 5002  | ARHGAP28  | 198.0148 | 1.012735 | 0.216082 | 4.686806 | 2.78E-06 | 1.47E-05 | 127.9324 | 156.5598 | 109.9256 | 245.534  | 256.6933 | 291.444  |
| 1322  | LAMB2     | 9092.437 | 1.012445 | 0.103402 | 9.791332 | 1.23E-22 | 2.47E-21 | 6065.404 | 5866.065 | 6155.831 | 11566.88 | 11153.32 | 13747.11 |
| 1053  | LOC119621 | 3492.193 | 1.012333 | 0.094365 | 10.72784 | 7.53E-27 | 1.90E-25 | 2337.476 | 2251.505 | 2359.225 | 4738.806 | 4331.699 | 4934.449 |
| 1480  | GPAT4     | 2457.83  | 1.011844 | 0.108779 | 9.301851 | 1.38E-20 | 2.48E-19 | 1604.576 | 1703.546 | 1585.572 | 3171.852 | 3018.285 | 3663.15  |
| 17636 | LOC119611 | 14.12032 | 1.011073 | 0.721941 | 1.400492 | 0.161366 | 0.243248 | 7.589209 | 13.6853  | 6.261582 | 29.01765 | 17.11289 | 11.05477 |
| 14678 | LOC119621 | 22.25682 | 1.010987 | 0.534084 | 1.892936 | 0.058366 | 0.105714 | 18.43094 | 12.59047 | 13.2189  | 33.4819  | 25.66933 | 30.14938 |
| 12570 | LOC119621 | 38.33925 | 1.010596 | 0.441439 | 2.289319 | 0.022061 | 0.046648 | 31.44101 | 16.96977 | 28.52499 | 46.87467 | 44.92132 | 61.30375 |
| 1416  | VCL       | 10948.82 | 1.010401 | 0.106616 | 9.476991 | 2.62E-21 | 4.91E-20 | 7109.463 | 8038.742 | 6647.713 | 14151.69 | 13748.06 | 15997.26 |
| 19035 | LOC103231 | 12.52963 | 1.009748 | 0.856662 | 1.1787   | 0.238517 | 0.333128 | 1.626259 | 12.59047 | 10.43597 | 20.08914 | 21.39111 | 9.044815 |
| 1955  | EXTL3     | 1483.213 | 1.00967  | 0.124935 | 8.081552 | 6.39E-16 | 8.70E-15 | 1045.143 | 921.2941 | 991.4172 | 1930.79  | 1760.488 | 2250.149 |
| 22252 | LOC103211 | 3.47906  | 1.009655 | 1.47689  | 0.683636 | 0.494205 | 0.590439 | 2.710432 | 0        | 4.174388 | 6.696381 | 4.278221 | 3.014938 |
| 18429 | LOC103231 | 9.26304  | 1.00953  | 0.801109 | 1.260166 | 0.20761  | 0.29949  | 6.505036 | 4.926706 | 6.957314 | 11.16063 | 14.97377 | 11.05477 |
| 1542  | TMCC3     | 1030.697 | 1.009463 | 0.110723 | 9.117039 | 7.72E-20 | 1.33E-18 | 679.2342 | 719.2991 | 654.6832 | 1374.99  | 1336.944 | 1419.031 |
| 20071 | LOC103231 | 6.11394  | 1.009315 | 0.992212 | 1.017237 | 0.309041 | 0.409339 | 3.794605 | 4.926706 | 3.478657 | 11.16063 | 4.278221 | 9.044815 |
| 2132  | ILDR2     | 1021.394 | 1.009235 | 0.130553 | 7.730454 | 1.07E-14 | 1.34E-13 | 623.9414 | 766.924  | 645.6387 | 1305.794 | 1302.718 | 1483.35  |
| 19051 | CNTD1     | 10.28566 | 1.00899  | 0.857243 | 1.177017 | 0.239189 | 0.33378  | 7.047123 | 5.474118 | 7.653045 | 6.696381 | 27.80844 | 7.034856 |
| 1728  | LOC103241 | 1280.707 | 1.00861  | 0.116648 | 8.64664  | 5.30E-18 | 8.16E-17 | 846.1968 | 897.7554 | 809.1356 | 1531.239 | 1798.992 | 1800.923 |
| 4478  | CCDC160   | 220.2143 | 1.008389 | 0.200694 | 5.024512 | 5.05E-07 | 3.00E-06 | 135.5216 | 164.771  | 136.3633 | 319.1942 | 310.171  | 255.2648 |
| 2688  | CBX7      | 540.8849 | 1.007902 | 0.147153 | 6.849357 | 7.42E-12 | 7.34E-11 | 400.0597 | 316.9514 | 361.7803 | 738.834  | 675.959  | 751.7246 |
| 12474 | LOC119621 | 40.33248 | 1.007898 | 0.437162 | 2.305546 | 0.021136 | 0        |          |          |          |          |          |          |



|       |           |          |          |          |          |          |          |          |          |          |          |          |          |
|-------|-----------|----------|----------|----------|----------|----------|----------|----------|----------|----------|----------|----------|----------|
| 8957  | LOC103245 | 69.08487 | 1.004319 | 0.320956 | 3.129148 | 0.001753 | 0.005203 | 41.74065 | 43.79295 | 51.48412 | 100.4457 | 102.6773 | 74.36848 |
| 17856 | LOC119625 | 13.73221 | 1.004162 | 0.733962 | 1.368139 | 0.171269 | 0.254994 | 11.38381 | 12.59047 | 3.478657 | 17.85702 | 14.97377 | 22.10955 |
| 20005 | THSD8     | 7.227018 | 1.003671 | 0.975239 | 1.029154 | 0.303407 | 0.403204 | 5.96295  | 2.189647 | 6.261582 | 15.62489 | 4.278221 | 9.044815 |
| 3139  | KCNQ1     | 357.4757 | 1.003653 | 0.161029 | 6.232745 | 4.58E-10 | 3.88E-09 | 236.3497 | 221.1544 | 258.1163 | 486.6037 | 432.1004 | 510.5296 |
| 6509  | LOC103245 | 123.4407 | 1.003596 | 0.254947 | 3.936489 | 8.27E-05 | 0.000338 | 81.31296 | 74.99542 | 89.74935 | 140.624  | 203.2155 | 150.7469 |
| 1347  | RTL8C     | 4811.961 | 1.003313 | 0.103165 | 9.725305 | 2.35E-22 | 4.64E-21 | 2938.108 | 3507.815 | 3166.273 | 6361.562 | 6077.213 | 6820.796 |
| 1348  | LOC103235 | 4811.961 | 1.003313 | 0.103165 | 9.725305 | 2.35E-22 | 4.64E-21 | 2938.108 | 3507.815 | 3166.273 | 6361.562 | 6077.213 | 6820.796 |
| 18643 | MFAP5     | 9.810255 | 1.002065 | 0.811646 | 1.234608 | 0.216976 | 0.309867 | 7.047123 | 6.568942 | 5.565851 | 13.39276 | 19.252   | 7.034856 |
| 5453  | CCDC103   | 142.4188 | 1.001884 | 0.225735 | 4.438325 | 9.07E-06 | 4.42E-05 | 92.15468 | 105.1031 | 87.66215 | 194.195  | 175.4071 | 199.9909 |
| 3461  | FRY       | 398.7336 | 1.001783 | 0.169945 | 5.894739 | 3.75E-09 | 2.88E-08 | 245.023  | 312.5721 | 237.2444 | 542.4069 | 564.7252 | 490.43   |
| 20113 | LOC119625 | 5.824203 | 1.000958 | 0.990362 | 1.010699 | 0.31216  | 0.412607 | 3.794605 | 4.379295 | 3.478657 | 6.696381 | 8.556443 | 8.039836 |
| 13874 | LOC103245 | 31.97805 | 1.000441 | 0.491557 | 2.035248 | 0.041826 | 0.080146 | 19.51511 | 19.15941 | 24.3506  | 49.10679 | 55.61688 | 24.11951 |
| 1560  | SLC4A4    | 9423.793 | 1.000423 | 0.110404 | 9.061462 | 1.29E-19 | 2.19E-18 | 5987.344 | 7163.431 | 5695.257 | 12127.15 | 12115.92 | 13453.66 |
| 22405 | LOC119625 | 2.965147 | 1.000202 | 1.52464  | 0.656025 | 0.511808 | 0.607294 | 0.542086 | 1.094824 | 4.174388 | 6.696381 | 4.278221 | 1.004979 |
| 6560  | IKZF4     | 139.9887 | 0.998517 | 0.254975 | 3.916141 | 9.00E-05 | 0.000365 | 80.22878 | 95.79707 | 102.9682 | 171.8738 | 235.3022 | 153.7619 |
| 2036  | LOC103245 | 792.0275 | 0.998377 | 0.126403 | 7.898397 | 2.83E-15 | 3.69E-14 | 527.9921 | 481.7224 | 576.7613 | 1082.582 | 1011.799 | 1071.308 |
| 9802  | LOC119615 | 93.52814 | 0.998266 | 0.343706 | 2.90442  | 0.003679 | 0.009979 | 81.85504 | 36.67659 | 68.87741 | 102.6778 | 145.4595 | 125.6224 |
| 2166  | SEC11C    | 3378.8   | 0.998041 | 0.13022  | 7.664289 | 1.80E-14 | 2.21E-13 | 1981.868 | 2594.185 | 2183.205 | 4881.662 | 4712.461 | 3919.42  |
| 3445  | PELI3     | 305.4675 | 0.99778  | 0.168974 | 5.904916 | 3.53E-09 | 2.72E-08 | 212.4979 | 194.3312 | 206.6322 | 408.4792 | 363.6488 | 447.2159 |
| 7121  | DEFB112   | 141.9469 | 0.997343 | 0.270326 | 3.689412 | 0.000225 | 0.000839 | 94.86511 | 117.1461 | 70.26887 | 220.9806 | 194.6591 | 153.7619 |
| 10338 | LOC119625 | 62.19161 | 0.997126 | 0.358681 | 2.779983 | 0.005436 | 0.01398  | 49.32986 | 31.74989 | 43.83108 | 60.26743 | 100.5382 | 87.43321 |
| 6978  | LOC103225 | 99.55996 | 0.996857 | 0.266338 | 3.742823 | 0.000182 | 0.000693 | 74.80792 | 59.12048 | 66.09448 | 131.6955 | 121.9293 | 143.7121 |
| 22783 | STMND1    | 2.710723 | 0.996549 | 1.674166 | 0.595251 | 0.551676 | 0.64371  | 2.710432 | 1.094824 | 1.391463 | 8.928508 | 2.139111 | 0        |
| 1582  | CLDN1     | 19659.25 | 0.996152 | 0.11031  | 9.030488 | 1.71E-19 | 2.87E-18 | 12058.71 | 15250.35 | 12079.98 | 25622.59 | 25908.91 | 27034.95 |
| 1292  | MPC2      | 3815.373 | 0.995077 | 0.100709 | 9.880734 | 5.05E-23 | 1.04E-21 | 2565.153 | 2305.699 | 2778.055 | 5046.839 | 5159.535 | 5036.957 |
| 3616  | ARHGDIG   | 513.3353 | 0.994642 | 0.17385  | 5.721271 | 1.06E-08 | 7.77E-08 | 344.2248 | 290.6757 | 395.1754 | 783.4766 | 569.0034 | 697.4558 |
| 1730  | KLF6      | 4274.789 | 0.994539 | 0.115119 | 8.639264 | 5.66E-18 | 8.69E-17 | 2705.553 | 3262.574 | 2605.514 | 5482.104 | 5435.48  | 6157.509 |
| 1251  | ACAD11    | 2274.209 | 0.994178 | 0.099357 | 10.0061  | 1.43E-23 | 3.05E-22 | 1572.05  | 1568.882 | 1420.683 | 3064.71  | 2881.382 | 3137.546 |
| 18984 | LOC119615 | 8.516167 | 0.993983 | 0.837302 | 1.187126 | 0.235178 | 0.329339 | 4.878777 | 5.474118 | 6.957314 | 11.16063 | 8.556443 | 14.06971 |
| 1129  | TNKS1BP1  | 8519.48  | 0.993906 | 0.095593 | 10.39724 | 2.55E-25 | 6.01E-24 | 5664.803 | 5692.535 | 5735.609 | 11111.53 | 10434.58 | 12477.83 |
| 21829 | LOC119625 | 5.31565  | 0.993788 | 1.314847 | 0.75582  | 0.449757 | 0.547748 | 4.878777 | 5.474118 | 0        | 6.696381 | 12.83466 | 2.009959 |
| 1412  | ITGA5     | 8626.428 | 0.993625 | 0.104723 | 9.488165 | 2.35E-21 | 4.43E-20 | 5973.25  | 5768.626 | 5567.938 | 10897.24 | 10550.09 | 13001.42 |
| 16186 | LOC119615 | 16.4492  | 0.993334 | 0.609792 | 1.628973 | 0.103319 | 0.169698 | 11.9259  | 9.306001 | 11.82743 | 17.85702 | 25.66933 | 22.10955 |
| 16588 | ETV2      | 16.82384 | 0.992146 | 0.636268 | 1.559321 | 0.11892  | 0.19059  | 11.9259  | 6.568942 | 15.30609 | 26.78552 | 19.252   | 21.10457 |
| 8314  | SPATA2L   | 260.108  | 0.991758 | 0.299637 | 3.309867 | 0.000933 | 0.002985 | 230.3867 | 88.68071 | 204.545  | 316.962  | 308.0319 | 412.0416 |
| 2092  | SLC22A11  | 661.1968 | 0.991006 | 0.126975 | 7.804749 | 5.96E-15 | 7.58E-14 | 459.6892 | 410.0114 | 459.1827 | 890.6187 | 849.2269 | 898.4516 |
| 22232 | LRRRC63   | 3.715001 | 0.990677 | 1.441762 | 0.68713  | 0.492001 | 0.588334 | 0.542086 | 6.02153  | 0.695731 | 4.464254 | 8.556443 | 2.009959 |
| 1854  | P2RX4     | 1097.641 | 0.990611 | 0.119504 | 8.289359 | 1.14E-16 | 1.63E-15 | 736.1533 | 803.0531 | 666.5107 | 1412.936 | 1439.621 | 1527.569 |
| 1066  | UGP2      | 3551.586 | 0.990513 | 0.092817 | 10.67168 | 1.38E-26 | 3.44E-25 | 2339.103 | 2539.443 | 2254.17  | 4839.251 | 4665.4   | 4672.15  |
| 1321  | ELP3      | 2081.895 | 0.990316 | 0.101131 | 9.792432 | 1.21E-22 | 2.44E-21 | 1356.842 | 1507.025 | 1319.107 | 2756.677 | 2716.671 | 2835.047 |
| 20027 | LOC119625 | 6.106767 | 0.990303 | 0.967978 | 1.023064 | 0.306277 | 0.406554 | 4.336691 | 3.831883 | 4.174388 | 6.696381 | 8.556443 | 9.044815 |
| 4543  | LOC103225 | 203.8347 | 0.989763 | 0.198677 | 4.981775 | 6.30E-07 | 3.69E-06 | 120.3432 | 147.2538 | 142.6249 | 247.7661 | 286.6408 | 278.3793 |
| 21784 | LOC119615 | 4.343927 | 0.989627 | 1.298913 | 0.761889 | 0.446126 | 0.544449 | 3.252518 | 1.094824 | 4.174388 | 13.39276 | 2.139111 | 2.009959 |
| 13413 | LOC119625 | 33.54424 | 0.988434 | 0.46534  | 2.12411  | 0.033661 | 0.066717 | 23.30971 | 19.70683 | 23.65487 | 42.41041 | 62.03421 | 30.14938 |
| 23711 | LOC103225 | 1.630897 | 0.98821  | 2.184265 | 0.452423 | 0.650965 | 0.72981  | 0        | 1.094824 | 2.087194 | 4.464254 | 2.139111 | 0        |
| 23713 | CHST8     | 1.630897 | 0.98821  | 2.184265 | 0.452423 | 0.650965 | 0.72981  | 0        | 1.094824 | 2.087194 | 4.464254 | 2.139111 | 0        |
| 21404 | LOC103235 | 4.514153 | 0.988113 | 1.211187 | 0.815822 | 0.414602 | 0.514935 | 4.336691 | 1.094824 | 3.478657 | 4.464254 | 10.69555 | 3.014938 |
| 1418  | PAX8      | 5206.475 | 0.98794  | 0.104297 | 9.472355 | 2.74E-21 | 5.13E-20 | 3282.333 | 3865.822 | 3324.9   | 7024.504 | 6445.14  | 7296.151 |
| 1796  | LOC103225 | 4059.638 | 0.987637 | 0.116707 | 8.462518 | 2.62E-17 | 3.87E-16 | 2997.738 | 2360.987 | 2810.059 | 5435.229 | 4969.154 | 5784.662 |
| 2546  | SEMA6B    | 1332.354 | 0.987215 | 0.1398   | 7.061629 | 1.65E-12 | 1.72E-11 | 941.0619 | 837.5401 | 907.2337 | 1687.488 | 1512.351 | 2108.447 |
| 2042  | TP53I3    | 2005.83  | 0.987178 | 0.125111 | 7.890406 | 3.01E-15 | 3.92E-14 | 1480.98  | 1184.052 | 1374.069 | 2656.231 | 2400.082 | 2939.565 |
| 21838 | TRNAH-GU  | 4.304224 | 0.986887 | 1.307886 | 0.754567 | 0.450509 | 0.548413 | 2.168345 | 4.379295 | 2.087194 | 11.16063 | 0        | 6.029877 |
| 8451  | UNC80     | 83.76486 | 0.986256 | 0.301732 | 3.268653 | 0.001081 | 0.003399 | 45.53526 | 58.57306 | 64.70302 | 93.74933 | 130.4858 | 109.5428 |
| 17982 | TRNAI-AAL | 11.71588 | 0.986155 | 0.732391 | 1.346486 | 0.178146 | 0.263375 | 10.84173 | 7.116354 | 5.565851 | 17.85702 | 12.83466 | 16.07967 |
| 1944  | RIM1      | 1109.297 | 0.985819 | 0.121596 | 8.107358 | 5.17E-16 | 7.07E-15 | 777.3519 | 688.6441 | 770.1746 | 1502.221 | 1330.527 | 1586.863 |
| 1907  | TRMT12    | 887.9809 | 0.985078 | 0.120359 | 8.184472 | 2.73E-16 | 3.81E-15 | 630.9885 | 558.9075 | 600.4162 | 1102.671 | 1195.763 | 1239.14  |
| 4267  | AMDHD2    | 877.9465 | 0.984501 | 0.190129 | 5.178076 | 2.24E-07 | 1.40E-06 | 691.1601 | 404.5373 | 674.8594 | 1127.224 | 1084.529 | 1285.369 |
| 22052 | LOC119625 | 3.694172 | 0.98316  | 1.372944 | 0.716096 | 0.473932 | 0.571353 | 3.794605 | 2.737059 | 0.695731 | 2.232127 | 10.69555 | 2.009959 |
| 2988  | LOC103245 | 355.7958 | 0.982895 | 0.152603 | 6.440857 | 1.19E-10 | 1.06E-09 | 239.6022 | 251.262  | 225.417  | 486.6037 | 470.6043 | 461.2856 |
| 1551  | HACL1     | 1438.337 | 0.982587 | 0.108239 | 9.07798  | 1.11E-19 | 1.90E-18 | 1047.853 | 898.8502 | 953.152  | 1890.612 | 1923.06  | 1916.496 |
| 18994 | LOC103245 | 8.537692 | 0.982495 | 0.828241 | 1.186243 | 0.235526 | 0.329655 | 4.878777 | 5.474118 | 6.957314 | 11.16063 | 10.69555 | 12.05975 |
| 2130  | THRA      | 752.4002 | 0.982445 | 0.127053 | 7.732571 | 1.05E-14 | 1.32E-13 | 482.4569 | 528.7998 | 508.5796 | 995.5286 | 917.6785 | 1081.358 |
| 4067  | NUDT17    | 236.0444 | 0.981168 | 0.184441 | 5.319698 | 1.04E-07 | 6.79E-07 | 169.673  | 143.4219 | 162.1054 | 319.1942 | 329.423  | 292.449  |
| 18364 | LOC119625 | 13.30945 | 0.981097 | 0.771981 | 1.270882 | 0.203771 | 0.294995 | 4.878777 | 9.853413 | 11.82743 | 11.16063 | 32.08666 | 10.04979 |
| 14560 | DOC2A     | 25.40263 | 0.980352 | 0.512292 | 1.913659 | 0.055664 | 0.101636 | 14.09425 | 15.87494 | 20.87194 | 37.94616 | 38.50399 | 25.12449 |
| 16190 | LOC103225 | 20.51708 | 0.980021 | 0.601882 | 1.62826  | 0.10347  | 0.169904 | 18.97302 | 8.758589 | 13.2189  | 24.5534  | 38.50399 | 19.09461 |
| 6418  | UNC13D    | 148.7455 | 0.979858 | 0.246622 | 3.973114 | 7.09E-05 | 0.000294 | 119.259  | 78.8273  | 102.9682 | 171.8738 | 207.4937 | 212.0507 |
| 16634 | LOC103235 | 17.09142 | 0.979765 | 0.631292 | 1.551999 | 0.120662 | 0.192847 | 11.9259  | 7.663765 | 14.61036 | 22.32127 | 29.94755 | 16.07967 |
| 15819 | LOC103225 | 18.93618 | 0.97956  | 0.577394 | 1.69652  | 0.089788 | 0.150895 | 15.17842 | 9.306001 | 13.91463 | 24.5534  | 23.53022 | 27.13445 |
| 19138 | GSDMA     | 10.36976 | 0.979179 | 0.841788 | 1.163213 | 0.244743 | 0.339978 | 4.878777 |          |          |          |          |          |



|       |          |          |          |          |          |          |          |          |          |          |          |          |          |
|-------|----------|----------|----------|----------|----------|----------|----------|----------|----------|----------|----------|----------|----------|
| 2824  | UPK1B    | 414.7732 | 0.977716 | 0.146858 | 6.657557 | 2.78E-11 | 2.62E-10 | 263.9961 | 293.9601 | 281.7712 | 531.2462 | 534.7777 | 582.8881 |
| 16028 | LOC10324 | 19.48304 | 0.977679 | 0.588715 | 1.660699 | 0.096774 | 0.160505 | 17.88885 | 8.211177 | 13.2189  | 26.78552 | 25.66933 | 25.12449 |
| 10588 | LOC10322 | 73.57816 | 0.97747  | 0.358629 | 2.725576 | 0.006419 | 0.016117 | 55.8349  | 41.05589 | 50.09266 | 127.2312 | 106.9555 | 60.29877 |
| 5607  | LOC11962 | 188.205  | 0.97731  | 0.223642 | 4.369984 | 1.24E-05 | 5.89E-05 | 113.8381 | 153.8227 | 112.7085 | 216.5163 | 278.0844 | 254.2598 |
| 18172 | CYP1D1   | 13.42931 | 0.977094 | 0.747171 | 1.307724 | 0.190967 | 0.279378 | 9.215468 | 4.379295 | 13.2189  | 22.32127 | 21.39111 | 10.04979 |
| 4509  | BORCS6   | 225.7658 | 0.977081 | 0.195121 | 5.007564 | 5.51E-07 | 3.25E-06 | 166.4205 | 137.9478 | 153.0609 | 314.7299 | 258.8324 | 323.6034 |
| 16739 | CNGA4    | 16.77287 | 0.977029 | 0.636408 | 1.535223 | 0.124729 | 0.198096 | 9.757555 | 12.59047 | 11.1317  | 18.57702 | 34.22577 | 15.07469 |
| 7601  | DACH1    | 120.5218 | 0.976959 | 0.277156 | 3.524946 | 0.000424 | 0.001481 | 68.84497 | 108.3875 | 66.09448 | 160.7131 | 158.2942 | 160.7967 |
| 16607 | LOC10324 | 16.03081 | 0.976924 | 0.627759 | 1.556208 | 0.119659 | 0.191542 | 8.131296 | 9.853413 | 14.61036 | 20.08914 | 21.39111 | 22.10955 |
| 17928 | LOC11962 | 13.09189 | 0.976866 | 0.720726 | 1.355392 | 0.175293 | 0.259937 | 5.420864 | 10.94824 | 9.740239 | 17.85702 | 23.53022 | 11.05477 |
| 20124 | LOC10324 | 6.132374 | 0.976645 | 0.968133 | 1.008792 | 0.313074 | 0.41359  | 3.794605 | 3.831883 | 4.87012  | 6.696381 | 8.556443 | 9.044815 |
| 14694 | LOC10323 | 25.05956 | 0.97562  | 0.515915 | 1.891049 | 0.058618 | 0.10605  | 19.51511 | 18.06459 | 12.52316 | 33.4819  | 40.6431  | 26.12947 |
| 2719  | TMEM50B  | 1017.846 | 0.974858 | 0.143052 | 6.8147   | 9.45E-12 | 9.24E-11 | 715.0119 | 561.6445 | 784.785  | 1330.133 | 1343.361 | 1400.941 |
| 19352 | LOC11962 | 9.679989 | 0.974468 | 0.865137 | 1.126374 | 0.260007 | 0.357151 | 5.96295  | 5.474118 | 7.653045 | 17.85702 | 17.11289 | 4.019918 |
| 15416 | LOC11961 | 23.75443 | 0.974458 | 0.554338 | 1.757876 | 0.078769 | 0.135837 | 9.757555 | 23.53871 | 14.61036 | 31.24978 | 34.22577 | 29.1444  |
| 13496 | LOC11961 | 28.55794 | 0.974327 | 0.462298 | 2.107576 | 0.035068 | 0.069078 | 21.14137 | 18.612   | 18.08902 | 37.94616 | 36.36488 | 39.1942  |
| 1804  | LOC10322 | 890.9709 | 0.973879 | 0.115432 | 8.436787 | 3.26E-17 | 4.81E-16 | 616.8943 | 609.2693 | 576.7613 | 1243.295 | 1118.755 | 1180.851 |
| 3294  | SLC66A1  | 984.5413 | 0.973857 | 0.161076 | 6.045936 | 1.49E-09 | 1.20E-08 | 764.8839 | 534.2739 | 696.4271 | 1334.812 | 1116.616 | 1460.235 |
| 11006 | WNT4     | 48.27789 | 0.973822 | 0.370568 | 2.627919 | 0.008591 | 0.020751 | 33.06727 | 29.01283 | 35.4823  | 55.80317 | 77.00798 | 59.29379 |
| 3995  | TBC1D10A | 533.2397 | 0.973817 | 0.181076 | 5.377936 | 7.53E-08 | 5.01E-07 | 403.8543 | 291.2231 | 387.5224 | 694.1915 | 592.5337 | 830.113  |
| 3723  | ZFYVE19  | 360.9464 | 0.973593 | 0.173307 | 5.617723 | 1.93E-08 | 1.38E-07 | 250.4439 | 250.1672 | 232.3743 | 495.5322 | 391.4573 | 545.7039 |
| 7628  | LOC10321 | 94.59283 | 0.973194 | 0.276745 | 3.516577 | 0.000437 | 0.001524 | 55.8349  | 70.06871 | 64.70302 | 127.2312 | 141.1813 | 108.5378 |
| 14306 | LOC11962 | 32.14115 | 0.972561 | 0.49619  | 1.96006  | 0.049989 | 0.092895 | 29.81475 | 13.13788 | 21.56767 | 49.10679 | 47.06043 | 32.15934 |
| 3011  | AFMID    | 593.588  | 0.972154 | 0.151822 | 6.403272 | 1.52E-10 | 1.34E-09 | 427.1641 | 337.2057 | 440.398  | 772.3159 | 742.2714 | 842.1728 |
| 7999  | SRD5A2   | 87.61064 | 0.972036 | 0.284799 | 3.413064 | 0.000642 | 0.002135 | 55.8349  | 60.2153  | 62.61582 | 116.0706 | 96.25998 | 134.6672 |
| 19467 | LOC11961 | 9.820498 | 0.971962 | 0.878561 | 1.10631  | 0.268592 | 0.366801 | 12.46799 | 2.737059 | 4.87012  | 8.928508 | 12.83466 | 17.08465 |
| 10824 | LOC10322 | 55.79717 | 0.971903 | 0.364624 | 2.665496 | 0.007687 | 0.018882 | 37.94605 | 47.62483 | 27.13352 | 78.12444 | 70.59065 | 73.3635  |
| 20240 | LOC10322 | 6.915848 | 0.971881 | 0.982673 | 0.989018 | 0.322654 | 0.423795 | 3.794605 | 3.831883 | 6.261582 | 4.464254 | 17.11289 | 6.029877 |
| 17181 | LOC10322 | 16.72125 | 0.971677 | 0.66071  | 1.470656 | 0.141384 | 0.218771 | 12.46799 | 15.87494 | 5.565851 | 15.62489 | 25.66933 | 25.12449 |
| 19553 | TRNAS-AG | 8.058676 | 0.971144 | 0.890651 | 1.090375 | 0.275548 | 0.374657 | 5.96295  | 2.737059 | 7.653045 | 13.39276 | 8.556443 | 10.04979 |
| 21640 | AKAP4    | 4.560589 | 0.971028 | 1.239086 | 0.783665 | 0.433237 | 0.532237 | 0.542086 | 4.379295 | 4.174388 | 6.696381 | 8.556443 | 3.014938 |
| 4781  | LOC10323 | 256.3998 | 0.970789 | 0.201249 | 4.823832 | 1.41E-06 | 7.83E-06 | 168.5889 | 186.6674 | 164.1926 | 272.3195 | 414.9875 | 331.6432 |
| 1830  | LOC10322 | 792.9102 | 0.970704 | 0.116015 | 8.367089 | 5.91E-17 | 8.58E-16 | 538.8339 | 546.8644 | 522.4943 | 1060.26  | 1009.66  | 1079.348 |
| 9732  | LOC11962 | 70.7761  | 0.970164 | 0.332176 | 2.920636 | 0.003493 | 0.009542 | 60.71367 | 38.31883 | 43.83108 | 89.28508 | 109.0946 | 83.413   |
| 10462 | LOC11962 | 249.915  | 0.969454 | 0.352035 | 2.753858 | 0.00589  | 0.014966 | 106.791  | 302.7187 | 96.70666 | 377.2295 | 299.4755 | 316.5685 |
| 2177  | HERC3    | 662.1381 | 0.969337 | 0.12663  | 7.654891 | 1.93E-14 | 2.36E-13 | 456.4367 | 434.645  | 452.9211 | 808.03   | 928.374  | 892.4218 |
| 11885 | ABCA13   | 46.20966 | 0.968641 | 0.398842 | 2.428634 | 0.015156 | 0.033901 | 31.9831  | 32.2973  | 28.52499 | 55.80317 | 83.42532 | 45.22408 |
| 21538 | LOC10324 | 3.984901 | 0.968388 | 1.21215  | 0.798901 | 0.424348 | 0.523785 | 3.252518 | 2.189647 | 2.782925 | 2.232127 | 6.417332 | 7.034856 |
| 6593  | LOC10323 | 115.1374 | 0.968009 | 0.247945 | 3.904123 | 9.46E-05 | 0.000381 | 80.77087 | 69.5213  | 84.1835  | 138.3919 | 156.1551 | 161.8017 |
| 16562 | TMDD1    | 23.60813 | 0.967497 | 0.618752 | 1.563627 | 0.117905 | 0.189252 | 17.88885 | 9.853413 | 19.48048 | 29.01765 | 51.33866 | 14.06971 |
| 15608 | LOC10324 | 21.18071 | 0.967243 | 0.559755 | 1.727976 | 0.083993 | 0.143064 | 15.7205  | 14.78012 | 11.82743 | 35.71403 | 29.94755 | 19.09461 |
| 17684 | LOC10324 | 13.73789 | 0.966693 | 0.696448 | 1.388032 | 0.165127 | 0.248242 | 8.131296 | 8.211177 | 11.1317  | 26.78552 | 17.11289 | 11.05477 |
| 22355 | LOC10321 | 2.673267 | 0.966211 | 1.44984  | 0.666426 | 0.505139 | 0.600721 | 1.084173 | 1.642235 | 2.782925 | 2.232127 | 4.278221 | 4.019918 |
| 1706  | SEMA4D   | 1176.254 | 0.966119 | 0.110963 | 8.706702 | 3.13E-18 | 4.88E-17 | 760.0051 | 837.5401 | 794.5252 | 1540.168 | 1478.125 | 1647.161 |
| 1287  | PLSCR1   | 2794.231 | 0.965531 | 0.097585 | 9.894267 | 4.41E-23 | 9.10E-22 | 1802.979 | 2045.678 | 1827.686 | 3665.153 | 3796.921 | 3626.971 |
| 2017  | HGH1     | 977.5859 | 0.965215 | 0.121516 | 7.943134 | 1.97E-15 | 2.60E-14 | 633.699  | 672.2217 | 684.5997 | 1283.473 | 1176.511 | 1415.011 |
| 21157 | SRRM5    | 5.315057 | 0.965142 | 1.125857 | 0.857251 | 0.391306 | 0.491699 | 1.626259 | 7.116354 | 2.087194 | 4.464254 | 8.556443 | 8.039836 |
| 11210 | LOC10322 | 54.01368 | 0.963919 | 0.373442 | 2.581174 | 0.009846 | 0.023351 | 36.31979 | 27.918   | 46.614   | 62.49956 | 66.31243 | 84.41828 |
| 9959  | ACHE     | 57.2762  | 0.963776 | 0.335496 | 2.872689 | 0.00407  | 0.010865 | 35.7777  | 37.224   | 43.83108 | 71.42806 | 77.00798 | 78.3884  |
| 3709  | PPIL4    | 936.5123 | 0.963439 | 0.171023 | 5.633372 | 1.77E-08 | 1.27E-07 | 553.4702 | 822.76   | 527.3644 | 1303.562 | 1197.902 | 1214.015 |
| 15195 | LOC10321 | 24.14701 | 0.962854 | 0.535874 | 1.796792 | 0.072369 | 0.126615 | 17.34676 | 13.6853  | 17.39328 | 35.71403 | 40.6431  | 20.09959 |
| 7659  | LOC10321 | 102.62   | 0.962741 | 0.274488 | 3.507403 | 0.000453 | 0.001571 | 75.89209 | 56.93083 | 75.13899 | 136.1597 | 154.016  | 117.5826 |
| 1773  | VP37A    | 2119.035 | 0.961727 | 0.112812 | 8.525016 | 1.53E-17 | 2.29E-16 | 1324.317 | 1621.434 | 1368.504 | 2694.177 | 2821.487 | 2884.291 |
| 1623  | MGAT4B   | 11891.35 | 0.961443 | 0.107826 | 8.916634 | 4.81E-19 | 7.87E-18 | 8521.056 | 7380.753 | 8311.903 | 15573.55 | 14122.41 | 17438.4  |
| 11487 | LOC10324 | 48.98096 | 0.961108 | 0.381437 | 2.519705 | 0.011745 | 0.027183 | 31.9831  | 31.74989 | 35.4823  | 87.05295 | 51.33866 | 56.27885 |
| 18908 | LOC10323 | 12.09437 | 0.960479 | 0.799093 | 1.201962 | 0.229378 | 0.32251  | 6.505036 | 14.23271 | 3.478657 | 22.32127 | 14.97377 | 11.05477 |
| 22375 | TRNAM-C  | 2.685575 | 0.960191 | 1.449615 | 0.662376 | 0.50773  | 0.603263 | 1.084173 | 2.189647 | 2.087194 | 4.464254 | 4.278221 | 2.009959 |
| 18435 | LOC11962 | 10.94208 | 0.959455 | 0.762085 | 1.258987 | 0.208035 | 0.300006 | 9.215468 | 6.568942 | 6.261582 | 11.16063 | 21.39111 | 11.05477 |
| 1652  | SH3PXD2B | 5775.49  | 0.959344 | 0.108471 | 8.844231 | 9.22E-19 | 1.48E-17 | 3656.373 | 4326.196 | 3790.345 | 7546.821 | 6994.892 | 8338.315 |
| 2817  | SUMF1    | 1141.148 | 0.959195 | 0.143907 | 6.665358 | 2.64E-11 | 2.49E-10 | 859.2069 | 649.2304 | 820.2673 | 1506.686 | 1341.222 | 1670.276 |
| 1860  | PKD2     | 2139.724 | 0.958475 | 0.115776 | 8.278679 | 1.25E-16 | 1.78E-15 | 1366.058 | 1634.572 | 1363.633 | 2796.855 | 2648.219 | 3029.008 |
| 21375 | KRT82    | 4.849542 | 0.958339 | 1.167826 | 0.820618 | 0.411864 | 0.512253 | 1.084173 | 2.737059 | 6.261582 | 6.696381 | 4.278221 | 8.039836 |
| 4866  | RABEP2   | 354.2575 | 0.957083 | 0.201004 | 4.761517 | 1.92E-06 | 1.05E-05 | 285.6795 | 177.3614 | 260.2035 | 430.8005 | 494.1346 | 477.3652 |
| 20089 | LOC10323 | 8.838396 | 0.956989 | 0.943557 | 1.014236 | 0.31047  | 0.410864 | 9.215468 | 1.642235 | 6.957314 | 8.928508 | 19.252   | 7.034856 |
| 20714 | LOC11962 | 5.608154 | 0.95681  | 1.043352 | 0.917054 | 0.359114 | 0.460898 | 3.252518 | 6.02153  | 2.087194 | 6.696381 | 8.556443 | 7.034856 |
| 23114 | LOC11961 | 2.170418 | 0.95643  | 1.766881 | 0.54131  | 0.588294 | 0.676638 | 1.626259 | 0        | 2.782925 | 4.464254 | 2.139111 | 2.009959 |
| 19640 | LOC10323 | 9.736398 | 0.956404 | 0.88607  | 1.079377 | 0.280419 | 0.37958  | 5.96295  | 7.663765 | 6.261582 | 22.32127 | 2.139111 | 14.06971 |
| 22730 | LOC11962 | 2.425068 | 0.955647 | 1.582059 | 0.604053 | 0.545809 | 0.638396 | 2.168345 | 0.547412 | 2.087194 | 4.464254 | 4.278221 | 1.004979 |
| 14111 | LOC10322 | 31.93069 | 0.955457 | 0.479745 | 1.991593 | 0.046416 | 0.087441 | 17.34676 | 29.01283 | 18.08902 | 44.64254 | 51.33866 | 31.15436 |



|       |           |          |          |          |          |          |          |          |          |          |          |          |          |
|-------|-----------|----------|----------|----------|----------|----------|----------|----------|----------|----------|----------|----------|----------|
| 23180 | LOC119615 | 2.167223 | 0.953472 | 1.789302 | 0.532874 | 0.594121 | 0.681347 | 1.626259 | 0.547412 | 2.087194 | 4.464254 | 4.278221 | 0        |
| 18579 | LOC119625 | 11.59555 | 0.953294 | 0.769797 | 1.23837  | 0.215579 | 0.308476 | 8.131296 | 6.02153  | 9.044508 | 20.08914 | 19.252   | 7.034856 |
| 16741 | LOC119625 | 18.53993 | 0.952879 | 0.620831 | 1.534845 | 0.124822 | 0.198219 | 18.43094 | 9.853413 | 9.044508 | 29.01765 | 27.80844 | 17.08465 |
| 1920  | NTAQ1     | 1003.593 | 0.952869 | 0.116909 | 8.150507 | 3.62E-16 | 5.02E-15 | 660.2612 | 719.2991 | 669.9893 | 1435.258 | 1251.38  | 1285.369 |
| 2365  | WDR47     | 823.2128 | 0.952586 | 0.130093 | 7.322334 | 2.44E-13 | 2.74E-12 | 561.0594 | 603.2478 | 521.1028 | 1053.564 | 1005.382 | 1194.921 |
| 21026 | LOC119624 | 4.838347 | 0.952406 | 1.086604 | 0.876498 | 0.380759 | 0.481427 | 3.252518 | 3.284471 | 3.478657 | 6.696381 | 4.278221 | 8.039836 |
| 3648  | PPP1R3G   | 297.6582 | 0.952183 | 0.167067 | 5.699397 | 1.20E-08 | 8.76E-08 | 214.1241 | 194.3312 | 201.7621 | 381.6937 | 367.927  | 426.1113 |
| 2005  | CYB5R1    | 964.1806 | 0.952144 | 0.119555 | 7.964032 | 1.67E-15 | 2.21E-14 | 701.4598 | 616.9331 | 655.379  | 1256.687 | 1197.902 | 1356.722 |
| 15290 | LOC119625 | 21.23485 | 0.952062 | 0.534435 | 1.781438 | 0.074841 | 0.130127 | 14.09425 | 14.78012 | 14.61036 | 31.24978 | 23.53022 | 29.1444  |
| 10080 | LOC119625 | 62.85475 | 0.951773 | 0.334907 | 2.841906 | 0.004484 | 0.011827 | 37.40396 | 39.96106 | 50.78839 | 80.35657 | 96.25998 | 72.35852 |
| 2737  | TFCP2L1   | 919.5585 | 0.951718 | 0.140032 | 6.796441 | 1.07E-11 | 1.04E-10 | 556.7227 | 705.6138 | 621.2881 | 1174.099 | 1105.92  | 1353.707 |
| 1041  | CUNH12or  | 10284.55 | 0.951446 | 0.087996 | 1.812242 | 3.01E-27 | 7.68E-26 | 7340.934 | 6517.485 | 7175.773 | 13819.1  | 13149.11 | 13704.91 |
| 13014 | BMP8A     | 33.74385 | 0.95142  | 0.432264 | 2.201016 | 0.027735 | 0.056653 | 24.93597 | 23.53871 | 20.87194 | 37.94616 | 44.92132 | 50.24897 |
| 2689  | CRY2      | 1060.086 | 0.950856 | 0.13883  | 6.849068 | 7.43E-12 | 7.35E-11 | 763.2576 | 664.0105 | 745.824  | 1381.687 | 1195.763 | 1609.977 |
| 19766 | LOC103235 | 11.25553 | 0.950742 | 0.898246 | 1.058443 | 0.289854 | 0.389849 | 7.589209 | 2.737059 | 12.52316 | 6.696381 | 29.94755 | 8.039836 |
| 20687 | DMRT1     | 7.004507 | 0.95041  | 1.029193 | 0.923452 | 0.355772 | 0.45716  | 1.626259 | 8.211177 | 4.174388 | 11.16063 | 12.83466 | 4.019918 |
| 2007  | GRB14     | 724.9556 | 0.950062 | 0.119322 | 7.962166 | 1.69E-15 | 2.24E-14 | 493.8407 | 509.093  | 479.3589 | 946.4218 | 990.4082 | 930.611  |
| 1123  | DNAJC3    | 5843.835 | 0.949947 | 0.091119 | 10.42538 | 1.90E-25 | 4.50E-24 | 4017.944 | 4089.714 | 3855.743 | 7653.963 | 7225.916 | 8219.727 |
| 9753  | SLC25A35  | 83.45353 | 0.949851 | 0.325731 | 2.916058 | 0.003545 | 0.009663 | 42.82482 | 71.71095 | 57.04997 | 82.5887  | 121.9293 | 124.6175 |
| 18161 | ACTN2     | 19.41495 | 0.949794 | 0.724959 | 1.310136 | 0.19015  | 0.278351 | 7.589209 | 20.25424 | 11.1317  | 24.5534  | 44.92132 | 8.039836 |
| 3594  | MPND      | 697.9457 | 0.949659 | 0.165077 | 5.752807 | 8.78E-09 | 6.49E-08 | 558.891  | 387.0202 | 482.8376 | 1017.85  | 806.4447 | 934.6309 |
| 17890 | LOC103217 | 16.40506 | 0.948915 | 0.6966   | 1.36221  | 0.173132 | 0.25727  | 14.63633 | 9.853413 | 8.348776 | 22.32127 | 34.22577 | 9.044815 |
| 4643  | SNX21     | 385.2995 | 0.948822 | 0.192735 | 4.922931 | 8.53E-07 | 4.88E-06 | 301.9421 | 202.5424 | 286.6413 | 491.0679 | 457.7697 | 571.8333 |
| 1720  | ESCO2     | 1396.54  | 0.948612 | 0.109266 | 8.681644 | 3.90E-18 | 6.03E-17 | 912.8734 | 1027.492 | 921.1483 | 1747.755 | 1852.47  | 1917.501 |
| 1307  | CD47      | 2890.385 | 0.9484   | 0.096504 | 9.82756  | 8.57E-23 | 1.74E-21 | 2082.696 | 1926.342 | 1913.261 | 3602.653 | 3805.478 | 4011.878 |
| 24155 | LOC119625 | 1.055565 | 0.948326 | 2.484771 | 0.381655 | 0.702717 | 0.773411 | 0.542086 | 1.642235 | 0        | 0        | 2.139111 | 2.009959 |
| 1711  | PPM1B     | 6199.119 | 0.94765  | 0.10898  | 8.695608 | 3.45E-18 | 5.36E-17 | 4116.604 | 4801.349 | 3782.691 | 7845.926 | 8167.125 | 8481.022 |
| 8408  | LOC103225 | 92.35614 | 0.947355 | 0.288888 | 3.279317 | 0.001041 | 0.00329  | 66.13454 | 50.36189 | 73.05179 | 136.1597 | 104.8164 | 123.6125 |
| 2774  | PLPP2     | 774.6347 | 0.947346 | 0.140616 | 6.737106 | 1.62E-11 | 1.55E-10 | 578.4062 | 465.8475 | 546.1491 | 986.6001 | 941.2087 | 1129.597 |
| 1835  | TMEM63B   | 3588.144 | 0.94716  | 0.113312 | 8.358861 | 6.33E-17 | 9.17E-16 | 2303.325 | 2808.77  | 2241.646 | 4665.145 | 4558.445 | 4951.534 |
| 1705  | ACSS2     | 4704.254 | 0.947103 | 0.108671 | 8.715346 | 2.90E-18 | 4.52E-17 | 3490.494 | 2966.425 | 3187.841 | 5935.226 | 5790.573 | 6854.965 |
| 1983  | SLC48A1   | 2045.435 | 0.946913 | 0.117957 | 8.027592 | 9.94E-16 | 1.33E-14 | 1359.553 | 1563.408 | 1270.405 | 2745.516 | 2468.534 | 2865.196 |
| 3850  | GPC5C     | 1313.24  | 0.946606 | 0.172192 | 5.497386 | 3.85E-08 | 2.66E-07 | 1024.001 | 701.7819 | 969.8495 | 1694.184 | 1420.369 | 2069.253 |
| 10894 | HDRAC9    | 67.91939 | 0.946486 | 0.356947 | 2.651615 | 0.008011 | 0.019549 | 48.24569 | 45.43518 | 43.83108 | 98.21359 | 115.512  | 56.27885 |
| 5277  | TSNAXIP1  | 183.9855 | 0.946464 | 0.208748 | 4.53401  | 5.79E-06 | 2.92E-05 | 118.7169 | 127.547  | 132.8847 | 209.8199 | 239.5804 | 275.3644 |
| 14886 | ELMO1     | 36.22108 | 0.946367 | 0.509509 | 1.857409 | 0.063253 | 0.112964 | 17.88885 | 27.918   | 27.82925 | 31.24978 | 81.28621 | 31.15436 |
| 12551 | SOX18     | 38.68999 | 0.946304 | 0.412733 | 2.292776 | 0.021861 | 0.046305 | 20.59928 | 29.01283 | 29.91645 | 46.87467 | 53.47777 | 52.25893 |
| 17009 | LOC103235 | 16.9779  | 0.946265 | 0.634736 | 1.4908   | 0.136014 | 0.212589 | 16.26259 | 8.758589 | 9.740239 | 29.01765 | 14.97377 | 23.11453 |
| 1879  | LOC103225 | 5465.554 | 0.945971 | 0.114886 | 8.233994 | 1.81E-16 | 2.56E-15 | 3390.208 | 4328.385 | 3488.397 | 7194.145 | 6855.85  | 7536.341 |
| 2925  | ZC3H3     | 1026.39  | 0.945092 | 0.145013 | 6.517286 | 7.16E-11 | 6.51E-10 | 760.5472 | 569.3083 | 777.8277 | 1305.794 | 1302.718 | 1442.146 |
| 16512 | LOC119625 | 22.30269 | 0.944977 | 0.60069  | 1.573152 | 0.115684 | 0.186255 | 17.88885 | 15.87494 | 11.1317  | 26.78552 | 47.06043 | 15.07469 |
| 7151  | LOC119625 | 107.354  | 0.944924 | 0.25674  | 3.680463 | 0.000233 | 0.000866 | 68.84497 | 72.25836 | 80.00911 | 147.3204 | 121.9293 | 153.7619 |
| 23459 | GPR78     | 1.612364 | 0.944458 | 1.922063 | 0.491377 | 0.62316  | 0.706198 | 1.084173 | 1.642235 | 0.695731 | 2.232127 | 0        | 4.019918 |
| 1084  | STAT1     | 22593.91 | 0.943937 | 0.089387 | 10.56009 | 4.56E-26 | 1.12E-24 | 15408.26 | 16215.98 | 14746.03 | 28738.63 | 28563.54 | 31891.01 |
| 17044 | LOC103225 | 15.58232 | 0.943744 | 0.63459  | 1.487171 | 0.13697  | 0.213647 | 7.589209 | 12.59047 | 11.82743 | 17.85702 | 23.53022 | 20.09959 |
| 15142 | LOC103215 | 25.78824 | 0.943149 | 0.521878 | 1.80722  | 0.070728 | 0.124178 | 20.59928 | 13.13788 | 18.78475 | 29.01765 | 47.06043 | 26.12947 |
| 22167 | PDZD9     | 3.779943 | 0.943145 | 1.353275 | 0.696935 | 0.485843 | 0.582674 | 0.542086 | 4.926706 | 2.087194 | 6.696381 | 6.417332 | 2.009959 |
| 6969  | KCNK5     | 107.8253 | 0.942733 | 0.251485 | 3.74866  | 0.000178 | 0.000678 | 78.06044 | 68.97389 | 75.13899 | 138.3919 | 132.6249 | 153.7619 |
| 3316  | PGPEP1    | 558.3373 | 0.942108 | 0.156271 | 6.028687 | 1.65E-09 | 1.33E-08 | 430.9587 | 329.5419 | 388.9138 | 680.7987 | 703.7674 | 816.0433 |
| 4595  | NIM1K     | 218.0494 | 0.942044 | 0.19049  | 4.945373 | 7.60E-07 | 4.40E-06 | 148.5317 | 146.7064 | 153.7566 | 247.7661 | 308.0319 | 303.5038 |
| 6384  | HSPA6     | 141.8734 | 0.940721 | 0.236026 | 3.985672 | 6.73E-05 | 0.00028  | 10.8752  | 94.70224 | 90.44508 | 178.5702 | 162.5724 | 217.0756 |
| 3661  | ZFP36     | 528.2836 | 0.940541 | 0.165396 | 5.686597 | 1.30E-08 | 9.41E-08 | 316.5784 | 434.645  | 335.3425 | 627.2277 | 727.2976 | 728.6101 |
| 4072  | ARSA      | 473.5955 | 0.940408 | 0.176838 | 5.3179   | 1.05E-07 | 6.85E-07 | 362.6558 | 256.1887 | 356.2145 | 647.3168 | 551.8906 | 667.3064 |
| 14703 | LOC103215 | 27.47153 | 0.940244 | 0.497412 | 1.890272 | 0.058722 | 0.106176 | 22.76763 | 16.96977 | 16.00182 | 40.17829 | 42.78221 | 26.12947 |
| 7340  | LURAP1    | 150.8425 | 0.94003  | 0.259748 | 3.619006 | 0.000296 | 0.001071 | 71.71095 | 121.753  | 203.1236 | 190.3808 | 200.9959 | 188.881  |
| 3208  | TEX9      | 1040.678 | 0.939548 | 0.152725 | 6.151911 | 7.66E-10 | 6.34E-09 | 634.2411 | 850.1305 | 651.9003 | 1410.704 | 1510.212 | 1186.821 |
| 17072 | LOC119625 | 18.7991  | 0.93913  | 0.632565 | 1.484637 | 0.13764  | 0.21433  | 21.14137 | 7.663765 | 9.740239 | 22.32127 | 27.80844 | 24.11951 |
| 18996 | CYP2S1    | 11.27391 | 0.938908 | 0.791713 | 1.185921 | 0.235654 | 0.329781 | 5.96295  | 9.853413 | 6.957314 | 11.16063 | 25.66933 | 8.039836 |
| 23960 | TRNAG-CC  | 1.365053 | 0.938364 | 2.271743 | 0.413059 | 0.679563 | 0.754015 | 1.626259 | 1.094824 | 0        | 4.464254 | 0        | 1.004979 |
| 21250 | TRNAR-AC  | 5.886268 | 0.938181 | 1.1145   | 0.841795 | 0.399903 | 0.500278 | 3.794605 | 7.663765 | 0.695731 | 6.696381 | 6.417332 | 10.04979 |
| 2865  | ZMIZ1     | 1038.671 | 0.938056 | 0.142318 | 6.591264 | 4.36E-11 | 4.05E-10 | 636.9515 | 850.1305 | 651.2046 | 1285.705 | 1366.892 | 1441.141 |
| 21386 | METTL24   | 6.245931 | 0.938039 | 1.146476 | 0.818193 | 0.413247 | 0.513709 | 5.96295  | 1.642235 | 4.87012  | 11.16063 | 12.83466 | 1.004979 |
| 13266 | LOC103225 | 46.1392  | 0.938028 | 0.435393 | 2.154441 | 0.031206 | 0.062531 | 48.24569 | 25.18094 | 21.56767 | 51.33892 | 64.17332 | 66.32864 |
| 17257 | LOC103235 | 17.48293 | 0.937816 | 0.643624 | 1.457086 | 0.145093 | 0.22352  | 14.09425 | 6.02153  | 16.00182 | 17.85702 | 27.80844 | 23.11453 |
| 20135 | LOC103245 | 7.576392 | 0.937773 | 0.931987 | 1.006208 | 0.314316 | 0.415003 | 3.252518 | 3.831883 | 8.348776 | 11.16063 | 12.83466 | 6.029877 |
| 2056  | TOM1      | 1859.648 | 0.937634 | 0.119043 | 7.87644  | 3.37E-15 | 4.36E-14 | 1358.468 | 1129.858 | 1342.762 | 2408.465 | 2263.179 | 2655.156 |
| 13007 | LOC103245 | 35.49128 | 0.937379 | 0.425541 | 2.202793 | 0.027609 | 0.056431 | 25.47806 | 27.918   | 19.48048 | 44.64254 | 49.19955 | 46.22906 |
| 24451 | LOC119624 | 0.795946 | 0.937223 | 2.776215 | 0.33759  | 0.735672 | 0.799895 | 1.084173 | 0.547412 | 0        | 0        | 2.139111 | 1.004979 |
| 21814 | LOC119615 | 4.848158 | 0.937212 | 1.236711 | 0.757826 | 0.448555 | 0.546635 | 6.505036 | 1.094824 | 2.087194 | 6.696381 | 10.69555 | 2.009959 |
| 3831  | NPTXR     | 427.368  | 0.936995 | 0.169964 | 5.512919 | 3.53E-08 | 2.45E-07 | 275.922  | 297.792  | 307.5133 |          |          |          |



|       |           |           |          |          |          |          |          |          |          |          |          |          |          |
|-------|-----------|-----------|----------|----------|----------|----------|----------|----------|----------|----------|----------|----------|----------|
| 1635  | RCAN3     | 1637.218  | 0.935879 | 0.10533  | 8.8852   | 6.38E-19 | 1.04E-17 | 1116.156 | 1208.138 | 1047.076 | 2205.341 | 2089.911 | 2156.686 |
| 12663 | LOC119621 | 41.9917   | 0.935788 | 0.412649 | 2.267756 | 0.023344 | 0.049009 | 23.30971 | 30.10765 | 32.69937 | 46.87467 | 72.72976 | 46.22906 |
| 6480  | TMEM91    | 232.9419  | 0.935671 | 0.237018 | 3.947674 | 7.89E-05 | 0.000324 | 202.7403 | 112.2194 | 165.5841 | 310.2657 | 280.2235 | 326.6183 |
| 16946 | LOC103224 | 17.58823  | 0.935309 | 0.623636 | 1.499768 | 0.133675 | 0.20971  | 9.215468 | 15.32753 | 11.1317  | 31.24978 | 23.53022 | 15.07469 |
| 21228 | LOC119624 | 6.421126  | 0.935272 | 1.104322 | 0.846919 | 0.39704  | 0.497236 | 5.96295  | 2.189647 | 4.87012  | 2.232127 | 19.252   | 4.019918 |
| 24675 | POU1F1    | 0.797721  | 0.935003 | 3.083533 | 0.303225 | 0.761719 | 0.820681 | 0        | 1.642235 | 0        | 0        | 2.139111 | 1.004979 |
| 5340  | SLC25A45  | 241.9988  | 0.934898 | 0.208004 | 4.494622 | 6.97E-06 | 3.47E-05 | 150.7    | 189.9519 | 159.3225 | 345.9797 | 250.2759 | 355.7627 |
| 24670 | LOC119619 | 0.813224  | 0.934724 | 3.064651 | 0.305002 | 0.760365 | 0.819388 | 0        | 1.642235 | 0        | 2.232127 | 0        | 1.004979 |
| 20956 | LOC119627 | 5.65151   | 0.934627 | 1.056719 | 0.884461 | 0.376447 | 0.477565 | 2.168345 | 3.284471 | 6.261582 | 4.464254 | 10.69555 | 7.034856 |
| 4182  | LOC103247 | 280.0104  | 0.934402 | 0.178361 | 5.23881  | 1.62E-07 | 1.03E-06 | 186.4777 | 215.1328 | 174.6286 | 401.7829 | 342.2577 | 359.7826 |
| 2462  | CHPF2     | 3104.901  | 0.934402 | 0.13012  | 7.181094 | 6.92E-13 | 7.47E-12 | 2288.689 | 1865.032 | 2251.387 | 3857.115 | 3640.766 | 4726.418 |
| 5693  | LOC103247 | 224.2907  | 0.934275 | 0.215725 | 4.330861 | 1.49E-05 | 6.94E-05 | 158.8313 | 124.8099 | 180.8902 | 285.7123 | 258.8324 | 336.6681 |
| 12779 | ANKMY1    | 37.89242  | 0.93414  | 0.416461 | 2.243045 | 0.024894 | 0.051785 | 28.18849 | 29.01283 | 20.87194 | 4.424041 | 55.61688 | 51.25395 |
| 17668 | LOC103234 | 14.92669  | 0.934081 | 0.671221 | 1.391615 | 0.164039 | 0.246829 | 7.589209 | 10.94824 | 11.82743 | 29.01765 | 17.11289 | 13.06473 |
| 19044 | CATSPER4  | 11.08818  | 0.933867 | 0.793004 | 1.177632 | 0.238943 | 0.333526 | 4.878777 | 9.853413 | 7.653045 | 17.85702 | 19.252   | 7.034856 |
| 22195 | LOC119615 | 3.516773  | 0.933641 | 1.347573 | 0.692831 | 0.488415 | 0.58502  | 3.252518 | 1.642235 | 2.087194 | 6.696381 | 6.417332 | 1.004979 |
| 24462 | TRNAF-GA  | 0.796833  | 0.933452 | 2.775452 | 0.336324 | 0.736626 | 0.800556 | 0.542086 | 1.094824 | 0        | 0        | 2.139111 | 1.004979 |
| 24443 | LOC103218 | 0.812336  | 0.933124 | 2.759855 | 0.338106 | 0.735283 | 0.799685 | 0.542086 | 1.094824 | 0        | 2.232127 | 0        | 1.004979 |
| 22981 | LOC119625 | 2.692129  | 0.933063 | 1.644532 | 0.567373 | 0.570461 | 0.659924 | 2.710432 | 0        | 2.782925 | 2.232127 | 6.417332 | 2.009959 |
| 3704  | S100A2    | 6101.088  | 0.933017 | 0.165571 | 5.635144 | 1.75E-08 | 1.26E-07 | 4936.238 | 2887.597 | 4759.498 | 8064.675 | 7963.909 | 7994.612 |
| 19117 | LOC103238 | 10.58409  | 0.932003 | 0.799659 | 1.165501 | 0.243816 | 0.339062 | 8.131296 | 4.926706 | 8.348776 | 20.08914 | 14.97377 | 7.034856 |
| 16877 | LOC103247 | 17.18737  | 0.931839 | 0.617046 | 1.510161 | 0.131002 | 0.206358 | 11.38381 | 15.87494 | 8.348776 | 17.85702 | 23.53022 | 26.12947 |
| 8836  | LOC103237 | 84.57684  | 0.931563 | 0.294662 | 3.161463 | 0.00157  | 0.004723 | 60.71367 | 58.02565 | 54.26705 | 127.2312 | 119.7902 | 87.43321 |
| 22396 | LOC119623 | 2.961914  | 0.931531 | 1.415243 | 0.658213 | 0.510401 | 0.605868 | 2.710432 | 2.737059 | 0.695731 | 4.464254 | 2.139111 | 5.024897 |
| 7200  | ENHO      | 110.4947  | 0.931476 | 0.254033 | 3.666753 | 0.000246 | 0.000907 | 82.39713 | 69.5213  | 77.22618 | 138.3919 | 132.6249 | 162.8067 |
| 1673  | CROT      | 1137.177  | 0.931466 | 0.105964 | 8.790416 | 1.49E-18 | 2.37E-17 | 816.9242 | 761.9972 | 768.0874 | 1464.275 | 1512.351 | 1499.429 |
| 2303  | CERT1     | 2353.587  | 0.931356 | 0.125702 | 7.409265 | 1.27E-13 | 1.47E-12 | 1587.771 | 1880.36  | 1390.071 | 2959.8   | 3067.485 | 3236.034 |
| 14946 | VSIG1     | 32.67718  | 0.930418 | 0.50393  | 1.846324 | 0.064845 | 0.115343 | 16.80468 | 26.82318 | 22.95914 | 40.17829 | 64.17332 | 25.12449 |
| 1725  | ENOSF1    | 1148.567  | 0.929992 | 0.107463 | 8.65405  | 4.97E-18 | 7.66E-17 | 827.7659 | 768.5662 | 777.1319 | 1450.883 | 1512.351 | 1554.703 |
| 2480  | TMEM65    | 2736.566  | 0.929913 | 0.129985 | 7.154018 | 8.43E-13 | 9.03E-12 | 1747.686 | 2264.095 | 1639.839 | 3558.01  | 3529.533 | 3680.235 |
| 17029 | EFCAB5    | 17.01226  | 0.929564 | 0.623895 | 1.489937 | 0.136241 | 0.212795 | 8.131296 | 10.94824 | 16.00182 | 20.08914 | 27.80844 | 19.09461 |
| 2813  | EML4      | 6517.876  | 0.928771 | 0.139141 | 6.675038 | 2.47E-11 | 2.34E-10 | 4022.281 | 5591.812 | 3855.048 | 8089.228 | 8487.991 | 9060.895 |
| 21091 | LOC103238 | 5.954609  | 0.928705 | 1.071863 | 0.866441 | 0.386249 | 0.486863 | 3.252518 | 3.831883 | 4.87012  | 8.928508 | 12.83466 | 2.009959 |
| 23471 | CCR2      | 1.898846  | 0.92848  | 1.899599 | 0.488777 | 0.625    | 0.707921 | 0        | 1.094824 | 2.782925 | 2.232127 | 4.278221 | 1.004979 |
| 20985 | LOC103227 | 5.719544  | 0.928396 | 1.053541 | 0.881215 | 0.378202 | 0.479147 | 2.168345 | 3.284471 | 6.261582 | 11.16063 | 6.417332 | 5.024897 |
| 23231 | LOC119619 | 2.163661  | 0.928074 | 1.770913 | 0.524066 | 0.600233 | 0.686836 | 1.084173 | 3.284471 | 0        | 4.464254 | 2.139111 | 2.009959 |
| 9680  | LOC119624 | 82.3517   | 0.927782 | 0.315957 | 2.936418 | 0.00332  | 0.009119 | 62.33993 | 42.15071 | 66.79021 | 109.3742 | 89.84265 | 123.6125 |
| 2966  | ESRRG     | 555.0646  | 0.927721 | 0.143408 | 6.469109 | 9.86E-11 | 8.84E-10 | 398.4335 | 365.1237 | 381.2608 | 712.0485 | 819.2794 | 654.2416 |
| 1535  | BIN3      | 1658.949  | 0.927278 | 0.101421 | 9.142845 | 6.08E-20 | 1.05E-18 | 1135.671 | 1143.543 | 1154.914 | 2131.681 | 2066.381 | 2321.503 |
| 18566 | LOC119625 | 14.06566  | 0.926838 | 0.747139 | 1.240515 | 0.214785 | 0.307554 | 9.215468 | 4.379295 | 15.30609 | 15.62489 | 27.80844 | 12.05975 |
| 23794 | LOC119618 | 1.906704  | 0.926495 | 2.120056 | 0.437014 | 0.662101 | 0.739748 | 0        | 3.831883 | 0        | 4.464254 | 2.139111 | 1.004979 |
| 2143  | DOCK5     | 3927.004  | 0.926132 | 0.120315 | 7.697544 | 1.39E-14 | 1.72E-13 | 2486.008 | 3176.083 | 2463.585 | 4935.233 | 5078.249 | 5422.869 |
| 8842  | NTF3      | 81.13143  | 0.926132 | 0.293225 | 3.158435 | 0.001586 | 0.004769 | 52.58238 | 58.02565 | 57.7457  | 118.3027 | 85.56443 | 114.5677 |
| 2274  | HAGH      | 1174.649  | 0.926092 | 0.124176 | 7.457885 | 8.79E-14 | 1.03E-12 | 822.8871 | 753.7861 | 858.5325 | 1448.65  | 1437.482 | 1726.555 |
| 2749  | IRF9      | 682.78    | 0.925921 | 0.136642 | 6.776237 | 1.23E-11 | 1.19E-10 | 511.7295 | 464.7526 | 434.8321 | 986.6001 | 821.4185 | 877.3471 |
| 10998 | LOC119627 | 62.33117  | 0.925389 | 0.35186  | 2.629988 | 0.008539 | 0.02064  | 42.28274 | 35.58177 | 50.09266 | 93.74933 | 91.98176 | 60.29877 |
| 21961 | LOC103246 | 12.00947  | 0.925272 | 1.260122 | 0.734272 | 0.462783 | 0.560246 | 0        | 0.547412 | 24.3506  | 17.85702 | 19.252   | 10.04979 |
| 23778 | LOC119623 | 1.592779  | 0.925152 | 2.102354 | 0.440055 | 0.659897 | 0.737767 | 1.626259 | 1.642235 | 0        | 0        | 4.278221 | 2.009959 |
| 2139  | NFKBIZ    | 6376.741  | 0.925076 | 0.119945 | 7.712506 | 1.23E-14 | 1.53E-13 | 3850.439 | 5171.947 | 4177.867 | 8207.531 | 8092.256 | 8760.406 |
| 1753  | MFHAS1    | 2424.169  | 0.925009 | 0.107708 | 8.588108 | 8.84E-18 | 1.34E-16 | 1740.639 | 1637.856 | 1644.709 | 2957.568 | 3024.702 | 3539.538 |
| 3251  | POMK      | 4621.2539 | 0.924769 | 0.151645 | 6.098264 | 1.07E-09 | 8.77E-09 | 332.841  | 325.71   | 298.4688 | 529.0141 | 618.203  | 663.2864 |
| 14630 | GPR162    | 32.04073  | 0.924724 | 0.486324 | 1.901457 | 0.057242 | 0.104018 | 19.51511 | 16.96977 | 29.22072 | 51.33892 | 47.06043 | 28.13943 |
| 2615  | UBE2J1    | 2499.19   | 0.924696 | 0.132903 | 6.957652 | 3.46E-12 | 3.52E-11 | 1529.768 | 2093.85  | 1549.394 | 3281.227 | 3270.7   | 3270.203 |
| 6859  | LRRC24    | 480.4913  | 0.924459 | 0.24376  | 3.792496 | 0.000149 | 0.000578 | 403.3123 | 195.426  | 397.2626 | 676.3345 | 526.2212 | 684.391  |
| 5728  | LOC119628 | 162.2156  | 0.924335 | 0.214448 | 4.310293 | 1.63E-05 | 7.57E-05 | 117.6327 | 120.4306 | 97.40239 | 207.5878 | 218.1893 | 212.0507 |
| 4749  | SUGCT     | 247.232   | 0.924126 | 0.190712 | 4.845664 | 1.26E-06 | 7.06E-06 | 162.0838 | 159.2968 | 190.6304 | 368.301  | 284.5017 | 318.5785 |
| 21008 | LOC103227 | 5.691733  | 0.923993 | 1.052198 | 0.878155 | 0.379859 | 0.480632 | 2.168345 | 2.737059 | 6.957314 | 6.696381 | 8.556443 | 7.034856 |
| 20699 | LOC119624 | 7.00287   | 0.922445 | 1.000377 | 0.922098 | 0.356478 | 0.457824 | 8.673382 | 3.284471 | 2.782925 | 8.928508 | 4.278221 | 14.06971 |
| 21401 | LOC103237 | 5.149714  | 0.921959 | 1.129295 | 0.816402 | 0.41427  | 0.51462  | 3.252518 | 2.189647 | 5.565851 | 6.696381 | 2.139111 | 11.05477 |
| 22857 | LOC119618 | 2.945298  | 0.921842 | 1.576024 | 0.584916 | 0.558604 | 0.649734 | 0.542086 | 1.642235 | 4.174388 | 0        | 4.278221 | 7.034856 |
| 2408  | LOC103247 | 755.3746  | 0.921311 | 0.126838 | 7.263694 | 3.77E-13 | 4.16E-12 | 527.45   | 545.7696 | 490.4906 | 959.8146 | 1078.112 | 930.611  |
| 10137 | MAGIX     | 75.21082  | 0.921076 | 0.325388 | 2.830704 | 0.004645 | 0.012181 | 54.75072 | 37.77142 | 63.31155 | 93.74933 | 111.2338 | 90.44815 |
| 10800 | CACNA1A   | 101.1624  | 0.921006 | 0.344873 | 2.670562 | 0.007572 | 0.01864  | 61.79785 | 62.95236 | 83.48776 | 120.5349 | 196.7982 | 81.40334 |
| 4804  | SLC9B2    | 328.1698  | 0.920919 | 0.191397 | 4.811573 | 1.50E-06 | 8.29E-06 | 206.5349 | 273.1585 | 200.3706 | 374.9973 | 489.8563 | 424.1013 |
| 12512 | MTMR7     | 50.24998  | 0.920838 | 0.400538 | 2.299002 | 0.021505 | 0.045693 | 29.81475 | 41.05589 | 32.00364 | 84.82083 | 70.59065 | 43.21412 |
| 2327  | CNNM4     | 1083.811  | 0.920615 | 0.124869 | 7.372661 | 1.67E-13 | 1.91E-12 | 728.022  | 828.7815 | 693.6442 | 1350.437 | 1358.335 | 1543.648 |
| 13489 | LOC119625 | 36.1697   | 0.919995 | 0.43621  | 2.109064 | 0.034939 | 0.06886  | 28.73058 | 24.08612 | 21.56767 | 42.41041 | 62.03421 | 38.18922 |
| 17313 | EDA       | 22.13546  | 0.919761 | 0.63594  | 1.446301 | 0.148093 | 0.227415 | 19.51511 | 13.13788 | 12.52316 | 20.08914 | 53.47777 | 14.06971 |
| 18165 | LOC103215 | 12.20708  | 0.919628 | 0.702253 | 1.309539 | 0.190352 | 0.278585 | 7.589209 | 9.306001 | 8.348776 | 20.08914 | 12.83466 | 15.07469 |
| 2814  | B3GNT5    | 877.3382  | 0.91953  | 0.137762 | 6.67477  | 2.48E-11 | 2.34E-10 | 576.23   |          |          |          |          |          |



|       |           |          |          |          |          |          |          |          |          |          |          |          |          |
|-------|-----------|----------|----------|----------|----------|----------|----------|----------|----------|----------|----------|----------|----------|
| 18023 | LOC103221 | 19.15114 | 0.918357 | 0.686038 | 1.338638 | 0.180688 | 0.266526 | 6.505036 | 24.63353 | 8.348776 | 20.08914 | 34.22577 | 21.10457 |
| 1241  | HMGCR     | 10265.82 | 0.917956 | 0.091532 | 10.02883 | 1.14E-23 | 2.44E-22 | 7411.947 | 7046.832 | 6863.39  | 12979.82 | 12779.05 | 14513.91 |
| 8212  | ADAMTS15  | 97.7935  | 0.917829 | 0.274584 | 3.342618 | 0.00083  | 0.002687 | 69.92914 | 58.57306 | 75.13899 | 107.1421 | 143.3204 | 132.6573 |
| 21088 | LOC119624 | 5.393892 | 0.917776 | 1.058442 | 0.867101 | 0.385887 | 0.486475 | 4.336691 | 3.831883 | 2.782925 | 6.696381 | 10.69555 | 4.019918 |
| 3393  | GAMT      | 921.4739 | 0.91759  | 0.154228 | 5.94957  | 2.69E-09 | 2.11E-08 | 687.9076 | 515.1145 | 713.1247 | 1249.991 | 1065.277 | 1297.428 |
| 2879  | FAM160B2  | 1118.465 | 0.917585 | 0.139509 | 6.577266 | 4.79E-11 | 4.42E-10 | 821.2608 | 696.8552 | 809.8313 | 1388.383 | 1292.023 | 1702.435 |
| 5736  | LOC119625 | 189.6741 | 0.917031 | 0.212939 | 4.306551 | 1.66E-05 | 7.69E-05 | 112.754  | 138.4952 | 141.9292 | 285.7123 | 231.024  | 228.1303 |
| 11355 | LOC103231 | 66.86507 | 0.916737 | 0.360017 | 2.546371 | 0.010885 | 0.02548  | 53.66655 | 36.12918 | 50.78839 | 71.42806 | 70.59065 | 118.5876 |
| 15645 | LOC119626 | 44.58581 | 0.916503 | 0.531107 | 1.725646 | 0.084411 | 0.143437 | 24.39389 | 13.13788 | 54.96278 | 55.80317 | 77.00798 | 42.20914 |
| 1448  | TMEM51    | 2426.747 | 0.916303 | 0.097814 | 9.367763 | 7.41E-21 | 1.36E-19 | 1695.104 | 1755.002 | 1595.312 | 3020.068 | 3159.466 | 3335.527 |
| 14592 | TMPRSS13  | 36.21845 | 0.915693 | 0.479847 | 1.908302 | 0.056352 | 0.102667 | 18.43094 | 25.18094 | 31.30791 | 33.4819  | 72.72976 | 36.17926 |
| 1871  | HIBADH    | 2893.018 | 0.915304 | 0.110946 | 8.249989 | 1.58E-16 | 2.25E-15 | 1871.824 | 2283.802 | 1858.994 | 3734.348 | 3769.113 | 3840.027 |
| 15089 | LOC103232 | 29.03259 | 0.914593 | 0.502991 | 1.81831  | 0.069017 | 0.121599 | 28.73058 | 15.32753 | 16.00182 | 46.87467 | 32.08666 | 35.17428 |
| 2806  | CLN8      | 726.3055 | 0.91449  | 0.136761 | 6.686791 | 2.28E-11 | 2.16E-10 | 534.4972 | 474.0586 | 505.7967 | 917.4042 | 857.7834 | 1068.293 |
| 2128  | ECM1      | 1513.859 | 0.914152 | 0.118125 | 7.738825 | 1.00E-14 | 1.25E-13 | 996.8968 | 1114.53  | 1042.206 | 1915.165 | 1805.409 | 2208.945 |
| 18320 | LOC119627 | 12.16251 | 0.913896 | 0.714347 | 1.279345 | 0.200776 | 0.291339 | 7.589209 | 10.40082 | 7.653045 | 13.39276 | 12.83466 | 21.10457 |
| 22494 | LOC119619 | 3.005167 | 0.913858 | 1.428401 | 0.639777 | 0.522318 | 0.617287 | 1.626259 | 1.642235 | 2.782925 | 6.696381 | 4.278221 | 1.004979 |
| 20948 | CPSF4L    | 5.982523 | 0.913661 | 1.032199 | 0.88516  | 0.376071 | 0.477269 | 3.252518 | 2.737059 | 6.261582 | 8.928508 | 10.69555 | 4.019918 |
| 10403 | LOC119628 | 67.00434 | 0.913627 | 0.33033  | 2.765802 | 0.005678 | 0.014511 | 46.61943 | 42.69812 | 50.09266 | 66.96381 | 111.2338 | 84.41828 |
| 2776  | LOC103222 | 588.5816 | 0.913452 | 0.135644 | 6.734164 | 1.65E-11 | 1.58E-10 | 382.1709 | 430.8131 | 411.873  | 825.887  | 705.9065 | 774.8392 |
| 21292 | LBHD1     | 5.121964 | 0.913326 | 1.0939   | 0.834927 | 0.403759 | 0.50413  | 4.878777 | 2.189647 | 3.478657 | 4.464254 | 10.69555 | 5.024897 |
| 21047 | LOC119615 | 6.225091 | 0.913305 | 1.046091 | 0.873065 | 0.382628 | 0.483302 | 6.505036 | 3.284471 | 2.782925 | 8.928508 | 12.83466 | 3.014938 |
| 6774  | DCT       | 136.0838 | 0.913251 | 0.238696 | 3.826002 | 0.00013  | 0.000511 | 102.9964 | 98.53413 | 81.40057 | 198.6593 | 154.016  | 180.8963 |
| 18537 | LOC103233 | 13.05758 | 0.913118 | 0.73279  | 1.246084 | 0.212734 | 0.305094 | 5.420864 | 6.568942 | 15.30609 | 17.5702  | 17.11289 | 16.07967 |
| 22610 | LOC119629 | 2.687679 | 0.912772 | 1.465131 | 0.622997 | 0.533286 | 0.626997 | 2.710432 | 2.189647 | 0.695731 | 2.232127 | 4.278221 | 4.019918 |
| 10348 | LOC103219 | 67.33589 | 0.912535 | 0.328606 | 2.776988 | 0.005487 | 0.014095 | 49.32986 | 39.96106 | 50.78839 | 71.42806 | 109.0946 | 83.4133  |
| 1896  | SLC20A2   | 1244.659 | 0.912332 | 0.11118  | 8.205932 | 2.29E-16 | 3.21E-15 | 854.3281 | 892.8287 | 846.7051 | 1649.542 | 1490.96  | 1733.59  |
| 21297 | LOC119620 | 5.123904 | 0.912321 | 1.093867 | 0.834033 | 0.404263 | 0.504593 | 4.878777 | 3.284471 | 2.782925 | 4.464254 | 4.278221 | 11.05477 |
| 3004  | AUTS2     | 1223.122 | 0.91191  | 0.142254 | 6.41043  | 1.45E-10 | 1.28E-09 | 769.7626 | 1018.186 | 758.3472 | 1484.364 | 1709.149 | 1598.922 |
| 4030  | HRK       | 307.5279 | 0.91163  | 0.170411 | 5.349582 | 8.82E-08 | 5.82E-07 | 201.114  | 218.9647 | 221.9383 | 348.2118 | 427.8221 | 427.1163 |
| 8390  | LOC103234 | 89.64716 | 0.911595 | 0.277543 | 3.284513 | 0.001022 | 0.003237 | 56.37698 | 64.59459 | 66.79021 | 109.3742 | 109.0946 | 131.6523 |
| 20463 | LOC119621 | 7.92093  | 0.91152  | 0.957558 | 0.951921 | 0.341137 | 0.443196 | 6.505036 | 3.284471 | 6.261582 | 15.62489 | 12.83466 | 3.014938 |
| 24698 | GUCA1AN   | 0.79914  | 0.910107 | 3.039842 | 0.299393 | 0.76464  | 0.823061 | 1.084173 | 0        | 0.695731 | 0        | 0        | 3.014938 |
| 2678  | SELENOM   | 832.3735 | 0.909883 | 0.132625 | 6.86058  | 6.86E-12 | 6.81E-11 | 575.6957 | 549.6015 | 611.5479 | 1169.635 | 939.0696 | 1148.692 |
| 11878 | LOC119622 | 71.38119 | 0.909652 | 0.374153 | 2.43123  | 0.015048 | 0.033679 | 33.60935 | 68.97389 | 45.91827 | 71.42806 | 121.9293 | 86.42823 |
| 4453  | RLBP1     | 270.4543 | 0.909548 | 0.180498 | 5.03909  | 4.68E-07 | 2.79E-06 | 191.3565 | 169.6977 | 204.545  | 314.7299 | 361.5097 | 380.8872 |
| 19018 | LOC103235 | 14.21087 | 0.909496 | 0.769863 | 1.181374 | 0.237454 | 0.331934 | 5.420864 | 7.116354 | 16.69755 | 22.32127 | 25.66933 | 8.039836 |
| 2693  | LOC103241 | 540.4693 | 0.909486 | 0.132849 | 6.845998 | 7.59E-12 | 7.50E-11 | 358.8612 | 395.2313 | 372.912  | 725.4413 | 673.8199 | 716.5504 |
| 13949 | LOC103236 | 54.01173 | 0.909253 | 0.44964  | 2.022181 | 0.043158 | 0.082253 | 41.19856 | 17.51718 | 53.57132 | 87.05295 | 68.45154 | 56.27885 |
| 5314  | B4GALNT3  | 211.749  | 0.908722 | 0.201453 | 4.510829 | 6.46E-06 | 3.23E-05 | 141.4845 | 131.3788 | 170.4542 | 267.8552 | 258.8324 | 300.4889 |
| 14320 | LOC103242 | 40.66667 | 0.908293 | 0.463929 | 1.957828 | 0.05025  | 0.093283 | 21.68345 | 42.15071 | 20.17621 | 51.33892 | 68.45154 | 40.19918 |
| 3670  | LOC103243 | 427.1304 | 0.908285 | 0.159913 | 5.679868 | 1.35E-08 | 9.76E-08 | 281.8849 | 321.3307 | 290.8157 | 502.2286 | 528.3603 | 638.162  |
| 20483 | LOC119623 | 7.067648 | 0.908206 | 0.956139 | 0.949869 | 0.342179 | 0.444116 | 7.589209 | 2.189647 | 4.87012  | 11.16063 | 8.556443 | 8.039836 |
| 8262  | ZBED6CL   | 93.02638 | 0.907927 | 0.27304  | 3.325251 | 0.000883 | 0.002843 | 67.21871 | 55.83601 | 70.9646  | 116.0706 | 130.4858 | 117.5826 |
| 3547  | TBC1D7    | 1586.499 | 0.907649 | 0.156289 | 5.807512 | 6.34E-09 | 4.75E-08 | 1249.509 | 821.1177 | 1239.793 | 2104.896 | 2036.433 | 2067.243 |
| 3747  | PNPLA7    | 442.5518 | 0.907102 | 0.162089 | 5.596311 | 2.19E-08 | 1.55E-07 | 341.5144 | 273.7059 | 310.9919 | 555.7996 | 524.0821 | 649.2167 |
| 19560 | CORIN     | 10.57885 | 0.90682  | 0.832395 | 1.089411 | 0.275973 | 0.375025 | 6.505036 | 8.758589 | 6.261582 | 13.39276 | 23.53022 | 5.024897 |
| 4988  | SLC3A1    | 197.9955 | 0.906793 | 0.193116 | 4.695584 | 2.66E-06 | 1.42E-05 | 140.9425 | 141.7797 | 129.406  | 256.6946 | 275.9453 | 243.205  |
| 7648  | CAPN8     | 110.1907 | 0.906576 | 0.258264 | 3.510273 | 0.000448 | 0.001556 | 75.89209 | 66.23683 | 87.66215 | 138.3919 | 158.2942 | 134.6672 |
| 23028 | LOC119624 | 2.730932 | 0.905429 | 1.624307 | 0.557425 | 0.577237 | 0.6664   | 1.626259 | 1.094824 | 2.782925 | 4.464254 | 6.417332 | 0        |
| 17176 | LOC119620 | 16.57615 | 0.905376 | 0.615391 | 1.471221 | 0.141231 | 0.218598 | 11.38381 | 10.94824 | 11.82743 | 24.5534  | 25.66933 | 15.07469 |
| 22792 | TRNAR-AC  | 3.270453 | 0.905232 | 1.524492 | 0.593792 | 0.552651 | 0.644622 | 3.252518 | 0        | 3.478657 | 4.464254 | 6.417332 | 2.009959 |
| 2379  | RARS2     | 743.2187 | 0.904896 | 0.123907 | 7.303046 | 2.81E-13 | 3.14E-12 | 519.8608 | 523.3257 | 507.1882 | 1060.26  | 924.0958 | 924.5811 |
| 2290  | CALCOCO1  | 1761.316 | 0.904741 | 0.121675 | 7.435727 | 1.04E-13 | 1.21E-12 | 1143.802 | 1417.797 | 1118.04  | 2229.895 | 2301.683 | 2356.677 |
| 5161  | EFNA1     | 205.2556 | 0.904687 | 0.196807 | 4.596832 | 4.29E-06 | 2.21E-05 | 148.5317 | 134.1159 | 147.4951 | 276.7837 | 233.1631 | 291.444  |
| 10887 | LOC103222 | 60.94521 | 0.903635 | 0.340647 | 2.652697 | 0.007985 | 0.0195   | 38.88813 | 48.17224 | 39.65669 | 93.74933 | 81.28621 | 64.31869 |
| 11255 | LOC119621 | 17853.73 | 0.903271 | 0.351587 | 2.569123 | 0.010196 | 0.024083 | 9987.399 | 11622.65 | 15711.01 | 16042.3  | 32069.55 | 21689.47 |
| 14763 | LOC103226 | 28.46755 | 0.902803 | 0.480403 | 1.879263 | 0.060209 | 0.108423 | 15.17842 | 23.53871 | 20.87194 | 31.24978 | 42.78221 | 37.18424 |
| 24709 | FAM106B   | 0.800916 | 0.902716 | 3.038027 | 0.297139 | 0.76636  | 0.824545 | 0        | 1.094824 | 0.695731 | 0        | 0        | 3.014938 |
| 5774  | ZNF688    | 200.6224 | 0.902203 | 0.210466 | 4.286692 | 1.81E-05 | 8.35E-05 | 153.4104 | 119.3358 | 146.1036 | 241.0697 | 301.6146 | 242.2001 |
| 24064 | TRNAS-AG  | 1.334935 | 0.90216  | 2.285604 | 0.394714 | 0.693054 | 0.765584 | 1.084173 | 1.642235 | 0        | 0        | 4.278221 | 1.004979 |
| 2534  | TFDP2     | 1573.774 | 0.901854 | 0.127456 | 7.075779 | 1.49E-12 | 1.56E-11 | 1066.284 | 1269.995 | 955.2392 | 1962.04  | 2102.746 | 2086.337 |
| 23560 | LOC119619 | 2.758185 | 0.9011   | 1.895995 | 0.475265 | 0.634598 | 0.716078 | 4.878777 | 0        | 0.695731 | 6.696381 | 4.278221 | 0        |
| 1969  | DPP7      | 4651.969 | 0.901061 | 0.111951 | 8.04874  | 8.37E-16 | 1.13E-14 | 3412.976 | 2943.433 | 3381.95  | 6194.152 | 5375.585 | 6603.72  |
| 20475 | LOC103228 | 6.5144   | 0.901005 | 0.94783  | 0.950598 | 0.341808 | 0.443821 | 4.878777 | 4.379295 | 4.174388 | 8.928508 | 10.69555 | 6.029877 |
| 14799 | LOC119625 | 1075.657 | 0.901002 | 0.481012 | 1.873138 | 0.061049 | 0.109669 | 952.4458 | 321.8781 | 976.8068 | 1334.812 | 1394.7   | 1473.3   |
| 16575 | LOC119627 | 20.37185 | 0.900924 | 0.576812 | 1.561901 | 0.118311 | 0.189751 | 10.48173 | 18.06459 | 13.2189  | 26.78552 | 34.22577 | 19.09461 |
| 2170  | IP6K3     | 1208.647 | 0.900757 | 0.117595 | 7.65982  | 1.86E-14 | 2.28E-13 | 853.2439 | 876.4063 | 802.874  | 1580.346 | 1422.509 | 1716.505 |
| 1884  | RAI1      | 1911.417 | 0.90067  | 0.109483 | 8.226579 | 1.93E-16 | 2.72E-15 | 1287.997 | 1370.719 | 1346.936 | 2377.215 | 2320.935 | 2764.699 |
| 2023  | TENM4     | 5203.529 | 0.900271 | 0.113577 | 7.926495 | 2.25E-15 | 2.96E-14 | 3408.639 | 4007.05  |          |          |          |          |



|       |           |          |          |          |          |          |          |          |          |          |          |          |          |
|-------|-----------|----------|----------|----------|----------|----------|----------|----------|----------|----------|----------|----------|----------|
| 24753 | LOC119624 | 1.077978 | 0.898388 | 3.11019  | 0.288853 | 0.772694 | 0.82975  | 0        | 2.189647 | 0        | 0        | 4.278221 | 0        |
| 24754 | LOC119625 | 1.077978 | 0.898388 | 3.11019  | 0.288853 | 0.772694 | 0.82975  | 0        | 2.189647 | 0        | 0        | 4.278221 | 0        |
| 4127  | PTPRH     | 395.23   | 0.89806  | 0.170352 | 5.271797 | 1.35E-07 | 8.70E-07 | 258.0331 | 324.0678 | 246.9846 | 520.0856 | 468.4652 | 553.7437 |
| 15266 | LOC10324  | 26.07904 | 0.897732 | 0.502885 | 1.785165 | 0.074235 | 0.129259 | 22.76763 | 13.13788 | 18.78475 | 31.24978 | 36.36488 | 34.1693  |
| 6833  | OCEL1     | 145.2818 | 0.897623 | 0.235925 | 3.804695 | 0.000142 | 0.000552 | 101.9122 | 87.03848 | 116.8829 | 165.1774 | 194.6591 | 206.0208 |
| 3201  | BCL2L11   | 611.0279 | 0.897373 | 0.145662 | 6.160666 | 7.24E-10 | 6.02E-09 | 443.4267 | 456.5415 | 381.2608 | 850.4404 | 697.3501 | 837.1479 |
| 2529  | LOC119626 | 675.7765 | 0.896956 | 0.126641 | 7.082685 | 1.41E-12 | 1.49E-11 | 476.4939 | 500.8818 | 437.615  | 879.458  | 906.9829 | 853.2276 |
| 19257 | CLPSL2    | 12.51812 | 0.896569 | 0.78387  | 1.143773 | 0.252718 | 0.348886 | 14.09425 | 6.02153  | 5.565851 | 17.85702 | 23.53022 | 8.039836 |
| 17118 | F7        | 21.53578 | 0.8965   | 0.606382 | 1.478442 | 0.13929  | 0.216323 | 11.9259  | 16.42235 | 16.00182 | 29.01765 | 42.78221 | 13.06473 |
| 12405 | ZNF575    | 47.39461 | 0.89637  | 0.386434 | 2.319596 | 0.020363 | 0.043639 | 29.27266 | 37.77142 | 31.30791 | 69.19594 | 70.59065 | 46.22906 |
| 2635  | TJP2      | 1347.769 | 0.895925 | 0.129459 | 6.920552 | 4.50E-12 | 4.54E-11 | 883.6008 | 1086.065 | 857.8368 | 1810.255 | 1610.75  | 1838.107 |
| 12677 | LOC119615 | 45.20844 | 0.895876 | 0.395492 | 2.265216 | 0.023499 | 0.049281 | 39.5723  | 29.56024 | 25.04633 | 69.19594 | 55.61688 | 52.25893 |
| 15329 | LOC10324  | 25.00288 | 0.895413 | 0.504822 | 1.773721 | 0.076109 | 0.131996 | 20.59928 | 17.51718 | 13.91463 | 33.4819  | 36.36488 | 28.13943 |
| 23431 | ZNF396    | 1.877119 | 0.895266 | 1.808962 | 0.494906 | 0.620667 | 0.704213 | 1.084173 | 2.189647 | 0.695731 | 0        | 4.278221 | 3.014938 |
| 18185 | LOC119618 | 265.4865 | 0.895221 | 0.686117 | 1.304764 | 0.191973 | 0.280634 | 92.15468 | 372.24   | 92.53227 | 383.9258 | 280.2235 | 371.8424 |
| 19637 | LOC11962  | 12.79574 | 0.89522  | 0.829276 | 1.079519 | 0.280356 | 0.379545 | 3.252518 | 8.758589 | 14.61036 | 11.16063 | 29.94755 | 9.044815 |
| 3741  | ASAP1     | 4457.293 | 0.895188 | 0.159746 | 5.603829 | 2.10E-08 | 1.49E-07 | 2599.846 | 4112.705 | 2638.909 | 5544.603 | 5859.024 | 5988.673 |
| 16278 | LOC10324  | 20.89726 | 0.894892 | 0.555149 | 1.611984 | 0.106965 | 0.174695 | 18.43094 | 11.49565 | 13.91463 | 22.32127 | 32.08666 | 27.13445 |
| 2543  | GNPTG     | 1232.573 | 0.894823 | 0.126689 | 7.063127 | 1.63E-12 | 1.70E-11 | 870.5907 | 794.842  | 926.0185 | 1540.168 | 1458.873 | 1804.943 |
| 1707  | PTGFR     | 2424.586 | 0.894791 | 0.102817 | 8.702766 | 3.24E-18 | 5.04E-17 | 1718.414 | 1771.425 | 1600.182 | 3212.031 | 2904.912 | 3340.552 |
| 3607  | LOC10322  | 344.9126 | 0.894721 | 0.156088 | 5.732163 | 9.92E-09 | 7.31E-08 | 240.6863 | 256.7361 | 226.8084 | 453.1218 | 427.8221 | 464.3005 |
| 1324  | NUCB1     | 8332.592 | 0.894695 | 0.091426 | 9.785997 | 1.29E-22 | 2.60E-21 | 5870.253 | 5929.017 | 5691.083 | 10816.89 | 10034.57 | 11653.74 |
| 11957 | LOC10323  | 80.29755 | 0.89455  | 0.370714 | 2.413048 | 0.01582  | 0.035173 | 42.82482 | 73.90059 | 50.09266 | 111.6063 | 139.0422 | 64.31869 |
| 22078 | NEUROG2   | 3.816187 | 0.894491 | 1.255149 | 0.712657 | 0.476058 | 0.57324  | 1.084173 | 2.737059 | 4.174388 | 4.464254 | 6.417332 | 4.019918 |
| 1791  | TRIM16    | 4161.284 | 0.894482 | 0.10552  | 8.476939 | 2.31E-17 | 3.43E-16 | 3118.623 | 2677.939 | 2941.552 | 5178.535 | 5131.726 | 5919.329 |
| 28982 | LOC11962  | 0.566904 | 0.894269 | 3.900188 | 0.229289 | 0.818645 | NA       | 0        | 0        | 1.391463 | 0        | 0        | 2.009959 |
| 20836 | LOC10323  | 9.087151 | 0.894216 | 0.994235 | 0.899401 | 0.368439 | 0.470098 | 5.420864 | 5.474118 | 7.653045 | 17.85702 | 17.11289 | 1.004979 |
| 1113  | LRRC17    | 6531.446 | 0.894212 | 0.085459 | 10.46369 | 1.27E-25 | 3.03E-24 | 4684.71  | 4301.015 | 4724.016 | 8486.547 | 8492.269 | 8500.116 |
| 22498 | LOC10321  | 3.274891 | 0.893979 | 1.39818  | 0.639388 | 0.522571 | 0.617501 | 0.542086 | 2.737059 | 3.478657 | 4.464254 | 6.417332 | 2.009959 |
| 12129 | MST1R     | 48.62296 | 0.893683 | 0.375606 | 2.37931  | 0.017345 | 0.038018 | 40.11439 | 27.918   | 34.09084 | 53.57105 | 72.72976 | 63.31371 |
| 21682 | LRRC74B   | 4.615554 | 0.893347 | 1.145598 | 0.779809 | 0.435504 | 0.533985 | 4.878777 | 3.284471 | 1.391463 | 6.696381 | 6.417332 | 5.024897 |
| 16074 | SIX2      | 36.89676 | 0.893335 | 0.540571 | 1.652578 | 0.098417 | 0.162773 | 19.51511 | 29.01283 | 27.82925 | 44.64254 | 81.28621 | 19.09461 |
| 15152 | EVPL      | 32.83098 | 0.893313 | 0.49476  | 1.80555  | 0.070989 | 0.124553 | 13.55216 | 22.44388 | 32.69937 | 51.33892 | 42.78221 | 34.1693  |
| 2123  | TRIM2     | 1388.167 | 0.893307 | 0.115295 | 7.748004 | 9.33E-15 | 1.17E-13 | 926.9677 | 1075.117 | 914.191  | 1805.791 | 1715.567 | 1891.371 |
| 2176  | HCFC1R1   | 3553.72  | 0.893177 | 0.116677 | 7.655138 | 1.93E-14 | 2.36E-13 | 2214.965 | 2881.576 | 2366.182 | 4689.699 | 4468.602 | 4701.294 |
| 5391  | LOC119615 | 289.8339 | 0.893146 | 0.199881 | 4.468396 | 7.88E-06 | 3.89E-05 | 227.1342 | 156.0124 | 226.8084 | 350.4439 | 378.6226 | 399.9818 |
| 20078 | HERC5     | 8.962565 | 0.893092 | 0.878935 | 1.016107 | 0.309579 | 0.409909 | 7.047123 | 7.116354 | 4.174388 | 11.16063 | 19.252   | 5.024897 |
| 21397 | LOC11962  | 7.782755 | 0.892608 | 1.092227 | 0.817237 | 0.413793 | 0.514123 | 13.01007 | 2.189647 | 1.391463 | 4.464254 | 8.556443 | 17.08465 |
| 20988 | MKRN3     | 6.492079 | 0.892463 | 1.012995 | 0.881013 | 0.378311 | 0.479197 | 2.710432 | 7.116354 | 4.174388 | 4.464254 | 6.417332 | 14.06971 |
| 13612 | RUND3A    | 41.0034  | 0.892057 | 0.427378 | 2.087279 | 0.036863 | 0.071995 | 25.47806 | 24.08612 | 37.56949 | 37.94616 | 55.61688 | 65.32367 |
| 19195 | CUNH1orf  | 10.06741 | 0.891412 | 0.771945 | 1.154761 | 0.248188 | 0.34374  | 5.96295  | 8.758589 | 6.261582 | 13.39276 | 14.97377 | 11.05477 |
| 9639  | HOXA2     | 98.56026 | 0.890975 | 0.301906 | 2.951167 | 0.003166 | 0.008731 | 50.95612 | 88.1333  | 67.48594 | 149.5525 | 117.6511 | 117.5826 |
| 16864 | LOC11962  | 18.26649 | 0.890464 | 0.588582 | 1.512897 | 0.130306 | 0.205419 | 11.38381 | 11.49565 | 16.00182 | 22.32127 | 19.252   | 29.1444  |
| 1945  | AHR       | 2607.521 | 0.890295 | 0.10985  | 8.104622 | 5.29E-16 | 7.23E-15 | 1729.256 | 2064.29  | 1689.236 | 3390.601 | 3315.622 | 3456.124 |
| 8097  | F8        | 145.894  | 0.889924 | 0.26314  | 3.381942 | 0.00072  | 0.002363 | 98.65972 | 121.5254 | 84.1835  | 216.5163 | 211.772  | 142.7071 |
| 7077  | COL21A1   | 150.5431 | 0.889678 | 0.240253 | 3.703087 | 0.000213 | 0.0008   | 108.4173 | 119.3358 | 88.35788 | 165.1774 | 231.024  | 190.9461 |
| 22502 | TRNAC-GC  | 3.256726 | 0.889573 | 1.392051 | 0.639038 | 0.522798 | 0.61766  | 2.168345 | 1.094824 | 3.478657 | 2.232127 | 8.556443 | 2.009959 |
| 11770 | PKNOX2    | 72.75843 | 0.889181 | 0.362245 | 2.454644 | 0.014102 | 0.031853 | 33.60935 | 68.42648 | 51.48412 | 71.42806 | 109.0946 | 102.5079 |
| 8169  | SPSB4     | 95.53485 | 0.889046 | 0.264794 | 3.357505 | 0.000786 | 0.00256  | 72.63957 | 67.33165 | 61.22436 | 118.3027 | 124.0684 | 129.6424 |
| 21877 | LOC10324  | 4.364822 | 0.888991 | 1.187746 | 4.784469 | 0.454177 | 0.551918 | 2.710432 | 2.737059 | 3.478657 | 6.696381 | 8.556443 | 2.009959 |
| 4991  | DUSP8     | 215.8745 | 0.888869 | 0.189347 | 4.694397 | 2.67E-06 | 1.42E-05 | 143.6529 | 146.7064 | 163.4969 | 305.8014 | 265.2497 | 270.3395 |
| 2418  | TRIM6     | 1969.104 | 0.88849  | 0.122579 | 7.248325 | 4.22E-13 | 4.64E-12 | 1302.091 | 1602.274 | 1239.793 | 2450.875 | 2575.489 | 2644.101 |
| 19678 | LOC10322  | 11.18183 | 0.888405 | 0.827133 | 1.074078 | 0.282788 | 0.382047 | 4.878777 | 8.758589 | 10.43597 | 15.62489 | 4.278221 | 23.11453 |
| 23148 | LOC11962  | 2.41522  | 0.888224 | 1.653389 | 0.537214 | 0.59112  | 0.67891  | 1.626259 | 2.737059 | 0.695731 | 0        | 6.417332 | 3.014938 |
| 7720  | PPARGC1A  | 145.1052 | 0.88801  | 0.254721 | 3.486205 | 0.00049  | 0.001687 | 77.51835 | 128.0944 | 99.48959 | 198.6593 | 183.9635 | 182.9063 |
| 4656  | LOC119618 | 376.8278 | 0.887894 | 0.180663 | 4.914646 | 8.89E-07 | 5.08E-06 | 317.6626 | 226.6285 | 247.6804 | 466.5145 | 541.195  | 461.2856 |
| 24249 | PDX1      | 1.627806 | 0.887794 | 2.409425 | 0.368467 | 0.712525 | 0.781165 | 0        | 0        | 3.478657 | 0        | 4.278221 | 2.009959 |
| 16885 | CACNA1C   | 34.13705 | 0.887621 | 0.588174 | 1.509113 | 0.13127  | 0.206681 | 15.17842 | 22.9913  | 32.69937 | 53.57105 | 66.31243 | 14.06971 |
| 19709 | LOC10324  | 11.95734 | 0.887503 | 0.831156 | 1.067794 | 0.285614 | 0.385257 | 14.09425 | 4.379295 | 6.261582 | 11.16063 | 27.80844 | 8.039836 |
| 6643  | KSR2      | 163.8983 | 0.887429 | 0.228697 | 3.880379 | 0.000104 | 0.000417 | 94.32303 | 136.853  | 113.4042 | 218.7484 | 216.0502 | 204.0108 |
| 1853  | DNAJB2    | 2359.767 | 0.886652 | 0.106918 | 8.292819 | 1.11E-16 | 1.59E-15 | 1645.232 | 1739.675 | 1589.746 | 2924.086 | 2877.104 | 3382.761 |
| 22499 | LOC11962  | 3.277424 | 0.886329 | 1.386768 | 0.639133 | 0.522737 | 0.617615 | 3.794605 | 2.189647 | 0.695731 | 6.696381 | 4.278221 | 2.009959 |
| 19137 | LOC11962  | 12.18484 | 0.886231 | 0.761778 | 1.163371 | 0.244679 | 0.339906 | 10.84173 | 5.474118 | 9.740239 | 6.696381 | 19.252   | 21.10457 |
| 23488 | LOC10321  | 2.758315 | 0.886137 | 1.821648 | 0.486448 | 0.626649 | 0.709219 | 0        | 2.189647 | 3.478657 | 4.464254 | 6.417332 | 0        |
| 18678 | LOC11962  | 13.11869 | 0.886013 | 0.719492 | 1.231443 | 0.218157 | 0.310493 | 12.46799 | 7.663765 | 6.957314 | 22.32127 | 19.252   | 10.04979 |
| 1817  | CD46      | 9579.667 | 0.885711 | 0.105324 | 8.409389 | 4.12E-17 | 6.03E-16 | 7273.173 | 5844.716 | 7068.631 | 12140.54 | 12306.3  | 12844.64 |
| 24347 | LOC11962  | 1.091706 | 0.885342 | 2.49569  | 0.354748 | 0.722778 | 0.789217 | 1.084173 | 1.094824 | 0        | 2.232127 | 2.139111 | 0        |
| 9801  | LOC11962  | 103.665  | 0.885006 | 0.304687 | 2.904642 | 0.003677 | 0.009973 | 74.26583 | 66.78424 | 80.00911 | 104.91   | 109.0946 | 186.9262 |
| 14325 | ANO7      | 46.86378 | 0.884746 | 0.452054 | 1.95717  | 0.050327 | 0.0934   | 30.35684 | 23.53871 | 44.52681 | 42.41041 | 94.12087 | 46.22906 |
| 1795  | MRAS      | 1360.829 | 0.884709 | 0.104446 | 8.470466 | 2.44E-17 | 3.62E-16 | 956.7824 | 998.4791 | 914.8868 | 1743.291 | 1713.428 | 1838.    |



|       |           |          |          |          |          |          |          |          |          |          |          |          |          |
|-------|-----------|----------|----------|----------|----------|----------|----------|----------|----------|----------|----------|----------|----------|
| 1173  | NCOA4     | 16950.5  | 0.883546 | 0.086116 | 10.25996 | 1.07E-24 | 2.42E-23 | 12316.74 | 11670.27 | 11766.9  | 21656.1  | 20864.89 | 23428.08 |
| 18683 | GRM7      | 16.40375 | 0.883374 | 0.717426 | 1.231309 | 0.218207 | 0.310522 | 6.505036 | 10.94824 | 16.69755 | 17.85702 | 36.36488 | 10.04979 |
| 21741 | LOC119625 | 4.347176 | 0.883144 | 1.145929 | 0.770679 | 0.440897 | 0.539106 | 3.252518 | 3.831883 | 2.087194 | 4.464254 | 6.417332 | 6.029877 |
| 3809  | ATG16L2   | 674.1185 | 0.883128 | 0.159671 | 5.530925 | 3.19E-08 | 2.22E-07 | 523.1133 | 386.4727 | 515.5369 | 819.1906 | 823.5576 | 976.84   |
| 2561  | TCEAL9    | 2521.468 | 0.882734 | 0.125529 | 7.032095 | 2.03E-12 | 2.11E-11 | 1572.593 | 2086.186 | 1658.624 | 3412.922 | 3292.091 | 3106.392 |
| 2187  | LOC119625 | 1343.089 | 0.882636 | 0.115625 | 7.633626 | 2.28E-14 | 2.77E-13 | 910.163  | 1040.63  | 884.9703 | 1696.417 | 1679.202 | 1847.152 |
| 24590 | LOC119626 | 1.077091 | 0.88249  | 2.77292  | 0.318253 | 0.750293 | 0.811165 | 0.542086 | 1.642235 | 0        | 0        | 4.278221 | 0        |
| 4001  | ATG4A     | 430.2898 | 0.882427 | 0.164214 | 5.373648 | 7.72E-08 | 5.13E-07 | 260.7435 | 353.628  | 294.2944 | 540.1747 | 554.0297 | 578.8682 |
| 3628  | LOC119625 | 777.585  | 0.882282 | 0.154429 | 5.71318  | 1.11E-08 | 8.13E-08 | 593.5846 | 443.4036 | 606.6778 | 986.6001 | 934.7914 | 1100.453 |
| 2001  | GPCPD1    | 1691.215 | 0.881939 | 0.110509 | 7.980669 | 1.46E-15 | 1.93E-14 | 1297.755 | 1147.923 | 1125.693 | 2049.093 | 2220.397 | 2306.428 |
| 21715 | LOC103235 | 5.262573 | 0.881788 | 1.136545 | 0.77585  | 0.437838 | 0.536031 | 2.168345 | 3.284471 | 5.565851 | 13.39276 | 2.139111 | 5.024897 |
| 14067 | LOC103235 | 35.18116 | 0.881714 | 0.440804 | 2.00024  | 0.045474 | 0.085941 | 27.6464  | 18.612   | 27.82925 | 40.17829 | 55.61688 | 41.20416 |
| 1335  | ACO1      | 5411.176 | 0.881526 | 0.090342 | 9.757601 | 1.71E-22 | 3.41E-21 | 3803.278 | 3978.589 | 3644.241 | 6841.469 | 6776.703 | 7422.778 |
| 20642 | GSTM3     | 7.636622 | 0.88066  | 0.948012 | 0.928955 | 0.352912 | 0.454468 | 3.252518 | 4.379295 | 8.348776 | 6.696381 | 17.11289 | 6.029877 |
| 3633  | ANKRD12   | 3532.373 | 0.880567 | 0.154228 | 5.709516 | 1.13E-08 | 8.29E-08 | 2076.733 | 3215.497 | 2166.507 | 4450.861 | 4804.443 | 4480.198 |
| 1855  | PPARD     | 1580.568 | 0.880521 | 0.106233 | 8.288584 | 1.15E-16 | 1.64E-15 | 1087.425 | 1175.293 | 1078.384 | 2011.146 | 1942.312 | 2188.845 |
| 22777 | OASL      | 2.72382  | 0.880513 | 1.476772 | 0.596242 | 0.551014 | 0.643136 | 3.252518 | 1.642235 | 0.695731 | 4.464254 | 4.278221 | 2.009959 |
| 1771  | ACADVL    | 4897.209 | 0.8802   | 0.103175 | 8.531128 | 1.45E-17 | 2.18E-16 | 3651.494 | 3316.768 | 3381.254 | 6078.082 | 5916.78  | 7038.876 |
| 18314 | LOC103225 | 14.91326 | 0.879966 | 0.687488 | 1.279973 | 0.200555 | 0.291128 | 13.01007 | 8.758589 | 9.740239 | 8.928508 | 29.94755 | 19.09461 |
| 7755  | DRC3      | 159.6111 | 0.879546 | 0.252977 | 3.476783 | 0.000507 | 0.00174  | 123.5957 | 80.46954 | 134.2762 | 189.7308 | 207.4937 | 222.1005 |
| 2114  | PCYT1A    | 2234.742 | 0.879278 | 0.113072 | 7.776235 | 7.47E-15 | 9.40E-14 | 1479.896 | 1710.662 | 1536.175 | 2758.909 | 2720.949 | 3201.865 |
| 13106 | LOC103234 | 40.70162 | 0.87909  | 0.40205  | 2.186519 | 0.028778 | 0.058374 | 26.56223 | 32.2973  | 26.43779 | 55.80317 | 59.8951  | 43.21412 |
| 1457  | DNAJC6    | 4816.888 | 0.879085 | 0.093996 | 9.352384 | 8.57E-21 | 1.56E-19 | 3371.235 | 3597.043 | 3214.279 | 6006.654 | 6094.326 | 6617.79  |
| 2573  | HPICAL1   | 1329.495 | 0.878624 | 0.125122 | 7.022158 | 2.18E-12 | 2.26E-11 | 994.1864 | 822.76   | 996.9831 | 1665.167 | 1623.585 | 1874.287 |
| 23119 | LOC119624 | 2.46078  | 0.878451 | 1.62506  | 0.540565 | 0.588807 | 0.677081 | 1.084173 | 0.547412 | 3.478657 | 2.232127 | 6.417332 | 1.004979 |
| 14713 | LOC119618 | 34.57328 | 0.8784   | 0.465212 | 1.888173 | 0.059003 | 0.106612 | 31.9831  | 18.612   | 22.2634  | 33.4819  | 59.8951  | 41.20416 |
| 1443  | INSIG1    | 4004.578 | 0.878381 | 0.093549 | 9.389565 | 6.02E-21 | 1.11E-19 | 2976.596 | 2650.568 | 2841.367 | 5087.017 | 5044.023 | 5427.894 |
| 17368 | LOC103225 | 18.66643 | 0.878206 | 0.611412 | 1.436357 | 0.150901 | 0.23098  | 12.46799 | 10.40082 | 16.00182 | 31.24978 | 27.80844 | 14.06971 |
| 2398  | VPS28     | 7145.61  | 0.878195 | 0.120731 | 7.273986 | 3.49E-13 | 3.87E-12 | 5468.025 | 4312.51  | 5330.694 | 9124.935 | 8391.731 | 10245.77 |
| 19790 | LOC119625 | 14.19026 | 0.878127 | 0.832535 | 1.054763 | 0.291534 | 0.391633 | 10.29964 | 6.02153  | 13.2189  | 8.928508 | 40.6431  | 6.029877 |
| 2101  | SIDT2     | 1778.882 | 0.878023 | 0.112653 | 7.794074 | 6.49E-15 | 8.21E-14 | 1312.391 | 1203.759 | 1249.534 | 2270.073 | 2089.911 | 2547.623 |
| 17924 | LOC103225 | 17.88082 | 0.877889 | 0.647444 | 1.355929 | 0.175122 | 0.259742 | 15.7205  | 6.568942 | 15.30609 | 33.4819  | 17.11289 | 19.09461 |
| 2071  | CRELD1    | 1316.983 | 0.877319 | 0.111762 | 7.849868 | 4.16E-15 | 5.35E-14 | 954.6141 | 886.8071 | 948.2819 | 1624.988 | 1630.002 | 1857.202 |
| 15074 | NOD2      | 29.94051 | 0.877187 | 0.481745 | 1.820852 | 0.068629 | 0.121037 | 22.22554 | 17.51718 | 22.95914 | 53.57105 | 34.22577 | 29.1444  |
| 6004  | CCDC183   | 165.3346 | 0.876881 | 0.210688 | 4.161997 | 3.15E-05 | 0.00014  | 120.8853 | 122.0728 | 107.1426 | 194.195  | 224.6066 | 223.1054 |
| 2255  | DCTN6     | 2363.256 | 0.876593 | 0.116874 | 7.500311 | 6.37E-14 | 7.51E-13 | 1486.401 | 1886.381 | 1625.228 | 3002.211 | 3240.753 | 2938.56  |
| 20315 | LOC103246 | 13.29766 | 0.876371 | 0.898275 | 0.975615 | 0.329255 | 0.430877 | 4.878777 | 14.23271 | 8.348776 | 26.78552 | 23.53022 | 2.009959 |
| 4131  | BCL3      | 439.1021 | 0.875943 | 0.166175 | 5.271194 | 1.36E-07 | 8.72E-07 | 259.1173 | 356.9125 | 313.7748 | 589.2815 | 532.6386 | 582.8881 |
| 23227 | ADAM30    | 2.757427 | 0.875667 | 1.667878 | 0.525019 | 0.59957  | 0.686248 | 0.542086 | 1.642235 | 3.478657 | 4.464254 | 6.417332 | 0        |
| 16268 | LOC103245 | 24.41769 | 0.875338 | 0.542277 | 1.61419  | 0.106486 | 0.174019 | 11.38381 | 16.96977 | 22.95914 | 35.71403 | 36.36488 | 23.11453 |
| 1405  | TSC22D1   | 4892.867 | 0.874988 | 0.091916 | 9.51944  | 1.74E-21 | 3.29E-20 | 3626.016 | 3260.932 | 3475.178 | 6314.687 | 6051.544 | 6628.845 |
| 7495  | CFAP45    | 127.4141 | 0.874147 | 0.245379 | 3.562439 | 0.000367 | 0.001303 | 91.6126  | 102.9134 | 75.13899 | 174.1059 | 151.8769 | 168.8366 |
| 3701  | PCMT1     | 2382.292 | 0.873995 | 0.154996 | 5.638827 | 1.71E-08 | 1.23E-07 | 1917.902 | 1241.53  | 1888.215 | 2977.657 | 3052.511 | 3215.934 |
| 23870 | BANF2     | 1.378352 | 0.873508 | 2.044464 | 0.427255 | 0.669194 | 0.74532  | 1.084173 | 0.547412 | 1.391463 | 2.232127 | 0        | 3.014938 |
| 8360  | LOC119625 | 111.677  | 0.873467 | 0.265128 | 3.294513 | 0.000986 | 0.003135 | 75.89209 | 81.01695 | 77.92191 | 176.338  | 143.3204 | 115.5726 |
| 21513 | LOC119626 | 6.059346 | 0.873368 | 1.088966 | 0.802015 | 0.422544 | 0.522165 | 1.626259 | 2.737059 | 8.348776 | 8.928508 | 10.69555 | 4.019918 |
| 1870  | MTARC2    | 1235.091 | 0.87322  | 0.105816 | 8.252215 | 1.55E-16 | 2.21E-15 | 912.8734 | 840.2771 | 865.4898 | 1582.578 | 1555.133 | 1654.196 |
| 16967 | LOC103225 | 18.89148 | 0.873061 | 0.583246 | 1.496902 | 0.134419 | 0.210616 | 11.38381 | 14.23271 | 13.91463 | 26.78552 | 29.94755 | 17.08465 |
| 2079  | R3HCC1    | 1016.665 | 0.872794 | 0.111303 | 7.841628 | 4.45E-15 | 5.69E-14 | 742.6583 | 688.6441 | 724.2564 | 1352.669 | 1247.102 | 1344.663 |
| 20748 | LOC119624 | 8.315263 | 0.872747 | 0.958322 | 0.910704 | 0.362451 | 0.464419 | 7.047123 | 5.474118 | 4.87012  | 22.32127 | 2.139111 | 8.039836 |
| 3662  | BATF2     | 360.9318 | 0.872511 | 0.153445 | 5.686141 | 1.30E-08 | 9.43E-08 | 257.491  | 245.7879 | 263.6822 | 455.3539 | 442.7959 | 500.4798 |
| 22844 | FEM1A     | 2.470058 | 0.871881 | 1.487044 | 0.586318 | 0.557662 | 0.648986 | 2.168345 | 1.642235 | 1.391463 | 4.464254 | 2.139111 | 3.014938 |
| 23875 | TRNAT-UG  | 1.37924  | 0.871405 | 2.044301 | 0.42626  | 0.669918 | 0.745876 | 0.542086 | 1.094824 | 1.391463 | 2.232127 | 0        | 3.014938 |
| 23876 | MT3       | 1.37924  | 0.871405 | 2.044301 | 0.42626  | 0.669918 | 0.745876 | 0.542086 | 1.094824 | 1.391463 | 2.232127 | 0        | 3.014938 |
| 2497  | PTK2      | 6817.676 | 0.871399 | 0.122046 | 7.139925 | 9.34E-13 | 9.94E-12 | 4269.472 | 5708.41  | 4481.206 | 8602.617 | 8487.917 | 9356.359 |
| 3457  | POLB      | 566.0428 | 0.870641 | 0.147653 | 5.896539 | 3.71E-09 | 2.86E-08 | 417.9486 | 347.0591 | 434.1364 | 763.3874 | 759.3843 | 674.3412 |
| 17336 | LRRC66    | 16.94849 | 0.869734 | 0.603166 | 1.441948 | 0.149317 | 0.22898  | 13.01007 | 13.6853  | 9.044508 | 22.32127 | 23.53022 | 20.09959 |
| 6661  | SLC22A4   | 209.0669 | 0.869552 | 0.224531 | 3.872757 | 0.000108 | 0.000429 | 177.2622 | 119.3358 | 148.8865 | 258.9267 | 237.4413 | 312.5486 |
| 17043 | LOC103235 | 26.7003  | 0.869474 | 0.584653 | 1.487162 | 0.136972 | 0.213647 | 15.17842 | 9.306001 | 32.00364 | 37.94616 | 40.6431  | 25.12449 |
| 20489 | LOC119625 | 8.831472 | 0.869335 | 0.916563 | 0.948472 | 0.342889 | 0.444903 | 7.589209 | 7.116354 | 3.478657 | 20.08914 | 10.69555 | 4.019918 |
| 13699 | SCN4B     | 43.5491  | 0.869196 | 0.420252 | 2.068274 | 0.038614 | 0.074937 | 21.14137 | 36.67659 | 34.09084 | 53.57105 | 70.59065 | 45.22408 |
| 1760  | HSD17B11  | 1499.869 | 0.869172 | 0.101387 | 8.572777 | 1.01E-17 | 1.53E-16 | 1092.304 | 1006.143 | 1085.341 | 1986.593 | 1895.252 | 1933.58  |
| 3982  | MXD1      | 513.2834 | 0.868991 | 0.161268 | 5.388487 | 7.11E-08 | 4.74E-07 | 311.6997 | 426.9812 | 351.3443 | 613.8349 | 699.4892 | 676.3512 |
| 11456 | LOC119624 | 60.73161 | 0.868942 | 0.344053 | 2.525601 | 0.01155  | 0.026803 | 37.94605 | 47.07742 | 43.13534 | 100.4457 | 68.45154 | 67.33362 |
| 23233 | LOC103216 | 1.917341 | 0.868884 | 1.657917 | 0.524082 | 0.600222 | 0.686836 | 1.084173 | 1.642235 | 1.391463 | 2.232127 | 2.139111 | 3.014938 |
| 1831  | RAB5A     | 6208.919 | 0.868532 | 0.103829 | 8.364984 | 6.01E-17 | 8.73E-16 | 4237.489 | 4949.15  | 3995.585 | 7915.122 | 8141.455 | 8014.711 |
| 22820 | LOC119625 | 2.989994 | 0.867747 | 1.471906 | 0.58954  | 0.555499 | 0.647123 | 4.336691 | 0.547412 | 1.391463 | 2.232127 | 6.417332 | 3.014938 |
| 17678 | IL4I1     | 24.13448 | 0.867645 | 0.624378 | 1.389615 | 0.164646 | 0.24761  | 18.43094 | 9.306001 | 22.95914 | 24.5534  | 53.47777 | 16.07967 |
| 9177  | TLE6      | 85.80839 | 0.867616 | 0.283381 | 3.061665 | 0.002201 | 0.006376 | 66.13454 | 59.66789 | 57.04997 | 93.74933 | 117.6511 | 120.5975 |
| 4717  | PRADC1    | 454.2115 | 0.86689  | 0.177968 |          |          |          |          |          |          |          |          |          |



|       |           |          |          |          |          |          |          |          |          |          |          |          |          |
|-------|-----------|----------|----------|----------|----------|----------|----------|----------|----------|----------|----------|----------|----------|
| 3965  | CDK18     | 477.5507 | 0.866364 | 0.160401 | 5.401238 | 6.62E-08 | 4.44E-07 | 298.1475 | 344.322  | 375.6949 | 542.4069 | 620.3421 | 684.391  |
| 23315 | LOC103225 | 1.918229 | 0.866316 | 1.69378  | 0.511469 | 0.609023 | 0.69444  | 0.542086 | 2.189647 | 1.391463 | 2.232127 | 2.139111 | 3.014938 |
| 5960  | SFRP1     | 166.8374 | 0.866058 | 0.207092 | 4.181995 | 2.89E-05 | 0.000129 | 125.222  | 119.3358 | 109.2298 | 218.7484 | 222.4675 | 206.0208 |
| 16420 | LOC119615 | 21.378   | 0.865703 | 0.545814 | 1.586077 | 0.112722 | 0.182504 | 17.88885 | 10.94824 | 16.69755 | 26.78552 | 27.80844 | 28.13943 |
| 1566  | ATP6V1A   | 9556.282 | 0.865666 | 0.095604 | 9.054679 | 1.37E-19 | 2.33E-18 | 7233.058 | 6230.641 | 6857.128 | 12022.24 | 11897.73 | 13096.89 |
| 1894  | DSCC1     | 1157.966 | 0.865398 | 0.10545  | 8.206722 | 2.27E-16 | 3.19E-15 | 813.6716 | 847.9409 | 800.7868 | 1444.186 | 1533.742 | 1507.469 |
| 2646  | CCNG2     | 940.0876 | 0.865211 | 0.125327 | 6.903651 | 5.07E-12 | 5.09E-11 | 635.8673 | 745.0275 | 617.8095 | 1160.706 | 1262.075 | 1219.04  |
| 2276  | TMEM127   | 1635.041 | 0.865064 | 0.116039 | 7.454928 | 8.99E-14 | 1.05E-12 | 1100.435 | 1287.513 | 1091.603 | 2078.11  | 1989.373 | 2263.214 |
| 21044 | LOC103244 | 6.3503   | 0.86466  | 0.988984 | 0.874292 | 0.38196  | 0.482532 | 3.794605 | 2.737059 | 6.957314 | 11.16063 | 6.417332 | 7.034856 |
| 23938 | LOC119615 | 1.39066  | 0.86462  | 2.071227 | 0.417443 | 0.676354 | 0.751112 | 1.084173 | 1.094824 | 0.695731 | 4.464254 | 0        | 1.004979 |
| 18940 | MN1       | 18.96002 | 0.864188 | 0.722074 | 1.196813 | 0.231379 | 0.324774 | 8.673382 | 10.94824 | 20.17621 | 17.85702 | 47.06043 | 9.044815 |
| 11446 | KIF5C     | 83.11152 | 0.864184 | 0.341996 | 2.526887 | 0.011508 | 0.026729 | 48.24569 | 74.99542 | 52.87558 | 80.35657 | 149.7377 | 92.45811 |
| 21855 | LOC119625 | 4.984256 | 0.864117 | 1.149307 | 0.751859 | 0.452136 | 0.54999  | 2.710432 | 2.737059 | 4.87012  | 11.16063 | 6.417332 | 2.009959 |
| 17962 | LOC103225 | 21.16865 | 0.86376  | 0.640243 | 1.349113 | 0.177301 | 0.262413 | 8.131296 | 9.853413 | 27.13352 | 24.5534  | 34.22577 | 23.11453 |
| 13201 | LOC103235 | 41.12961 | 0.863328 | 0.398021 | 2.169049 | 0.030079 | 0.060575 | 34.15144 | 25.18094 | 28.52499 | 53.57105 | 47.06043 | 58.28881 |
| 17391 | KIF17     | 31.08963 | 0.862585 | 0.603024 | 1.430434 | 0.152593 | 0.233236 | 24.39389 | 24.63353 | 16.00182 | 35.71403 | 72.72976 | 13.06473 |
| 21152 | LOC119625 | 6.568381 | 0.862004 | 1.004468 | 0.85817  | 0.390799 | 0.491177 | 2.168345 | 4.379295 | 7.653045 | 4.464254 | 10.69555 | 10.04979 |
| 6408  | LOC103245 | 170.7828 | 0.861981 | 0.216814 | 3.975677 | 7.02E-05 | 0.000291 | 133.8953 | 123.1677 | 107.8384 | 198.6593 | 213.9111 | 247.2249 |
| 10353 | LOC119625 | 89.54834 | 0.861624 | 0.310421 | 2.775664 | 0.005509 | 0.014146 | 82.39713 | 51.45671 | 55.65851 | 127.2312 | 124.0684 | 96.47803 |
| 4648  | NR1H3     | 470.3022 | 0.861397 | 0.175151 | 4.918036 | 8.74E-07 | 5.00E-06 | 397.8914 | 273.1585 | 331.8639 | 542.4069 | 635.3159 | 641.1769 |
| 2025  | ITPR3     | 13889.46 | 0.861234 | 0.108664 | 7.925677 | 2.27E-15 | 2.98E-14 | 9386.225 | 10632.38 | 9575.351 | 17120.41 | 16327.83 | 20294.56 |
| 3299  | LOC103225 | 563.5428 | 0.861105 | 0.142485 | 6.043483 | 1.51E-09 | 1.22E-08 | 391.9284 | 370.5978 | 436.9193 | 801.3336 | 693.0719 | 687.406  |
| 19729 | LOC119615 | 12.33449 | 0.861062 | 0.80915  | 1.064157 | 0.287258 | 0.387082 | 4.878777 | 9.853413 | 11.1317  | 11.16063 | 29.94755 | 7.034856 |
| 18377 | LOC119625 | 13.15805 | 0.86094  | 0.679126 | 1.267717 | 0.204899 | 0.296443 | 9.215468 | 8.211177 | 10.43597 | 15.62489 | 21.39111 | 14.06971 |
| 21344 | LOC119625 | 5.51844  | 0.860687 | 1.042994 | 0.825209 | 0.409253 | 0.509745 | 4.878777 | 3.284471 | 3.478657 | 11.16063 | 4.278221 | 6.029877 |
| 1141  | SCARB2    | 9173.351 | 0.860668 | 0.08318  | 10.34709 | 4.31E-25 | 1.00E-23 | 6468.717 | 6739.187 | 6341.591 | 11528.94 | 11617.51 | 12344.16 |
| 22183 | LOC103215 | 3.827937 | 0.86059  | 1.239314 | 0.694408 | 0.487426 | 0.584151 | 4.336691 | 1.642235 | 2.087194 | 4.464254 | 6.417332 | 4.019918 |
| 22373 | LOC119624 | 4.115307 | 0.86031  | 1.298599 | 0.662491 | 0.507657 | 0.603229 | 2.710432 | 1.642235 | 4.174388 | 4.464254 | 10.69555 | 1.004979 |
| 22879 | LOC119625 | 2.764043 | 0.859812 | 1.47658  | 0.5823   | 0.560365 | 0.651134 | 3.252518 | 1.094824 | 1.391463 | 6.696381 | 2.139111 | 2.009959 |
| 19690 | LOC103245 | 10.75669 | 0.859466 | 0.802248 | 1.071322 | 0.284025 | 0.383484 | 3.794605 | 6.568942 | 12.52316 | 15.62489 | 14.97377 | 11.05477 |
| 20610 | LOC119625 | 6.883064 | 0.859362 | 0.918803 | 0.935306 | 0.34963  | 0.450979 | 4.878777 | 4.926706 | 4.87012  | 11.16063 | 6.417332 | 9.044815 |
| 7096  | ECHDC2    | 131.0816 | 0.859276 | 0.232338 | 3.698391 | 0.000217 | 0.000813 | 102.9964 | 89.77554 | 86.27069 | 162.9453 | 179.6853 | 164.8166 |
| 5237  | PPP1R16A  | 1139.104 | 0.859271 | 0.188419 | 4.560425 | 5.11E-06 | 2.59E-05 | 992.0181 | 551.2437 | 887.0575 | 1473.204 | 1341.222 | 1589.878 |
| 15851 | LOC119625 | 25.18136 | 0.859112 | 0.507982 | 1.691225 | 0.090794 | 0.152278 | 18.43094 | 21.89647 | 13.2189  | 20.91765 | 36.36488 | 32.15934 |
| 12775 | LOC103224 | 47.76567 | 0.859053 | 0.382765 | 2.244336 | 0.024811 | 0.051632 | 29.27266 | 38.31883 | 33.39511 | 62.49956 | 74.86887 | 48.23901 |
| 20637 | LOC119625 | 9.56654  | 0.858609 | 0.923264 | 0.929972 | 0.352386 | 0.45395  | 5.96295  | 3.831883 | 10.43597 | 4.464254 | 25.66933 | 7.034856 |
| 3440  | ZNF572    | 421.5277 | 0.85856  | 0.145294 | 5.909143 | 3.44E-09 | 2.66E-08 | 318.7468 | 297.2446 | 283.8584 | 522.3177 | 541.195  | 565.8034 |
| 20740 | PKP1      | 7.711198 | 0.856771 | 0.939779 | 0.911672 | 0.361941 | 0.463944 | 2.168345 | 7.116354 | 6.957314 | 11.16063 | 12.83466 | 6.029877 |
| 23936 | LOC103225 | 1.363737 | 0.856743 | 2.050331 | 0.417856 | 0.676053 | 0.750871 | 0.542086 | 1.094824 | 1.391463 | 0        | 2.139111 | 3.014938 |
| 2585  | PITPNM2   | 830.9699 | 0.855863 | 0.122181 | 7.004857 | 2.47E-12 | 2.54E-11 | 622.3152 | 562.1919 | 592.7631 | 1051.332 | 1007.521 | 1149.697 |
| 6175  | ZNF425    | 199.6895 | 0.855789 | 0.209314 | 4.088546 | 4.34E-05 | 0.000187 | 158.8313 | 137.9478 | 131.4932 | 220.9806 | 252.4151 | 296.4689 |
| 5363  | SLC35E4   | 396.1992 | 0.85575  | 0.190905 | 4.482593 | 7.37E-06 | 3.66E-05 | 320.9151 | 215.1328 | 311.6877 | 520.0856 | 455.6306 | 553.7437 |
| 2868  | ADAMTS15  | 1241.831 | 0.855362 | 0.129832 | 6.588205 | 4.45E-11 | 4.13E-10 | 918.2943 | 754.3335 | 980.9812 | 1667.399 | 1505.934 | 1624.047 |
| 20337 | LOC103245 | 10.09611 | 0.855133 | 0.880522 | 0.971166 | 0.331466 | 0.4333   | 7.047123 | 6.568942 | 7.653045 | 4.464254 | 27.80844 | 7.034856 |
| 13180 | DDN       | 47.45617 | 0.855116 | 0.393341 | 2.173981 | 0.029707 | 0.05992  | 24.93597 | 36.12918 | 41.04815 | 49.10679 | 64.17332 | 69.34358 |
| 22784 | CXCL6     | 3.795512 | 0.854988 | 1.436316 | 0.595265 | 0.551666 | 0.64371  | 3.252518 | 3.284471 | 1.391463 | 0        | 12.83466 | 2.009959 |
| 2195  | CDK2AP2   | 1236.725 | 0.854929 | 0.112202 | 7.619523 | 2.55E-14 | 3.08E-13 | 848.9073 | 949.7595 | 844.6179 | 1616.06  | 1503.795 | 1657.211 |
| 14368 | IL37      | 36.49354 | 0.854755 | 0.438572 | 1.948952 | 0.051301 | 0.094922 | 22.22554 | 27.37059 | 27.82925 | 40.17829 | 64.17332 | 37.18424 |
| 15462 | C1QTNF2   | 42.02567 | 0.854274 | 0.487912 | 1.750877 | 0.079967 | 0.137486 | 40.11439 | 26.27577 | 22.2634  | 44.64254 | 87.70354 | 31.15436 |
| 6097  | MAPK8IP2  | 195.6185 | 0.85414  | 0.207192 | 4.122449 | 3.75E-05 | 0.000163 | 152.8684 | 116.5987 | 148.1908 | 267.8552 | 245.9977 | 242.2001 |
| 8121  | AJM1      | 121.3057 | 0.853937 | 0.253218 | 3.372338 | 0.000745 | 0.00244  | 92.15468 | 71.16354 | 96.70666 | 162.9453 | 139.0422 | 165.8216 |
| 2458  | AIFM2     | 1375.7   | 0.853282 | 0.118749 | 7.185601 | 6.69E-13 | 7.24E-12 | 1028.88  | 931.6949 | 983.7642 | 1823.648 | 1563.69  | 1922.526 |
| 17681 | TSHR      | 17.26582 | 0.852487 | 0.613907 | 1.388626 | 0.164947 | 0.248012 | 11.9259  | 10.94824 | 13.91463 | 15.62489 | 32.08666 | 19.09461 |
| 23204 | SDR42E2   | 2.453136 | 0.852227 | 1.610705 | 0.529102 | 0.596735 | 0.683684 | 1.084173 | 3.284471 | 0.695731 | 2.232127 | 6.417332 | 1.004979 |
| 18646 | LOC103225 | 21.62095 | 0.851655 | 0.690352 | 1.233653 | 0.217332 | 0.309867 | 23.30971 | 6.02153  | 16.69755 | 13.39276 | 49.19955 | 21.10457 |
| 3555  | RBK5      | 860.8105 | 0.851483 | 0.146772 | 5.801412 | 6.58E-09 | 4.92E-08 | 678.15   | 518.9464 | 646.3344 | 1176.331 | 973.2954 | 1171.806 |
| 17853 | LOC119624 | 17.93834 | 0.851291 | 0.622035 | 1.368557 | 0.171138 | 0.254829 | 8.673382 | 12.59047 | 16.69755 | 26.78552 | 27.80844 | 15.07469 |
| 10498 | EXD3      | 94.50852 | 0.850018 | 0.309666 | 2.744951 | 0.006052 | 0.015326 | 88.36008 | 47.62483 | 66.79021 | 113.8385 | 119.7902 | 130.6473 |
| 16569 | LOC103245 | 22.6536  | 0.849286 | 0.543576 | 1.562405 | 0.118193 | 0.18964  | 18.97302 | 13.6853  | 15.30609 | 40.17829 | 25.66933 | 22.10955 |
| 20645 | SHISAL2B  | 8.05344  | 0.849166 | 0.914105 | 0.928959 | 0.352911 | 0.454468 | 7.047123 | 3.831883 | 6.261582 | 17.85702 | 4.278221 | 9.044815 |
| 2616  | TACC1     | 3631.248 | 0.849045 | 0.12203  | 6.957666 | 3.46E-12 | 3.52E-11 | 2408.49  | 3026.093 | 2345.31  | 4504.432 | 4462.185 | 5040.977 |
| 21697 | LOC119625 | 5.758414 | 0.849045 | 1.091527 | 0.777851 | 0.436657 | 0.535029 | 3.794605 | 2.737059 | 5.565851 | 4.464254 | 14.97377 | 3.014938 |
| 9963  | NEK10     | 96.43447 | 0.849002 | 0.295612 | 2.872018 | 0.004079 | 0.010883 | 75.89209 | 57.47824 | 71.66033 | 127.2312 | 151.8769 | 94.46807 |
| 2692  | LPCAT3    | 2404.234 | 0.848659 | 0.123952 | 6.846683 | 7.56E-12 | 7.46E-11 | 1605.118 | 1999.695 | 1547.307 | 3044.621 | 2926.303 | 3302.363 |
| 1842  | UBR3      | 4130.468 | 0.848471 | 0.101853 | 8.330352 | 8.06E-17 | 1.16E-15 | 2891.489 | 3199.075 | 2762.054 | 5093.714 | 5123.17  | 5713.308 |
| 20236 | LOC119625 | 8.807683 | 0.848127 | 0.856814 | 0.989862 | 0.322242 | 0.423344 | 5.96295  | 4.926706 | 7.653045 | 11.16063 | 17.11289 | 6.029877 |
| 22453 | KCTD8     | 3.590034 | 0.847974 | 1.306525 | 0.64903  | 0.516319 | 0.611337 | 1.084173 | 4.379295 | 2.087194 | 6.696381 | 4.278221 | 3.014938 |
| 16371 | TRPC6     | 23.45126 | 0.847365 | 0.531604 | 1.593977 | 0.110941 | 0.180158 | 17.88885 | 13.6853  | 18.08902 | 35.71403 | 34.22577 | 21.10457 |
| 19398 | LAMP5     | 13.99018 | 0.847286 | 0.757792 | 1.118099 | 0.263525 | 0.361161 | 9.757555 | 4.926706 | 15.30609 | 8.928508 | 29.94755 | 15.07469 |
| 10644 | ZNF860    | 79.83749 | 0.84717  | 0.31     |          |          |          |          |          |          |          |          |          |



|                |          |          |          |          |          |          |          |          |          |          |          |          |
|----------------|----------|----------|----------|----------|----------|----------|----------|----------|----------|----------|----------|----------|
| 4191 KHK       | 701.0111 | 0.846375 | 0.161801 | 5.230959 | 1.69E-07 | 1.07E-06 | 563.2277 | 412.7485 | 530.843  | 812.4942 | 855.6443 | 1031.109 |
| 2720 CUNH8orff | 939.664  | 0.846321 | 0.124218 | 6.813162 | 9.55E-12 | 9.33E-11 | 673.8134 | 645.3985 | 700.6015 | 1120.528 | 1152.981 | 1344.663 |
| 22020 IL17RB   | 6.394594 | 0.846192 | 1.171417 | 0.722366 | 0.470069 | 0.56752  | 1.084173 | 6.02153  | 6.261582 | 11.16063 | 12.83466 | 1.004979 |
| 23133 TRNAS-CG | 2.212213 | 0.84559  | 1.567029 | 0.539613 | 0.589464 | 0.677448 | 1.626259 | 1.642235 | 1.391463 | 4.464254 | 2.139111 | 2.009959 |
| 2642 LOC10323  | 1573.033 | 0.845429 | 0.122269 | 6.914511 | 4.69E-12 | 4.72E-11 | 1201.263 | 1005.596 | 1172.307 | 1935.254 | 1886.696 | 2237.084 |
| 21065 LOC11962 | 6.352405 | 0.845139 | 0.970829 | 0.870534 | 0.384009 | 0.484579 | 5.420864 | 2.737059 | 5.565851 | 8.928508 | 6.417332 | 9.044815 |
| 10222 PCLO     | 130.862  | 0.844067 | 0.300362 | 2.810162 | 0.004952 | 0.012878 | 52.63957 | 136.3055 | 71.66033 | 178.5702 | 156.1551 | 169.8415 |
| 4059 TCP11L2   | 470.5048 | 0.843261 | 0.158325 | 5.326139 | 1.00E-07 | 6.57E-07 | 326.336  | 343.7746 | 340.9084 | 687.4951 | 498.4128 | 626.1022 |
| 6784 LOC10324  | 164.8217 | 0.8431   | 0.220509 | 3.823425 | 0.000132 | 0.000516 | 105.7068 | 131.9262 | 116.1871 | 187.4987 | 239.5804 | 208.0308 |
| 7224 LOC10324  | 204.2414 | 0.843054 | 0.230365 | 3.659645 | 0.000253 | 0.000929 | 131.727  | 182.2881 | 122.4487 | 281.248  | 286.6408 | 221.0955 |
| 5766 DLL1      | 262.9365 | 0.842562 | 0.196358 | 4.290954 | 1.78E-05 | 8.20E-05 | 187.5619 | 178.4563 | 201.0664 | 359.3724 | 265.2497 | 385.9121 |
| 20911 LOC10323 | 8.016175 | 0.842474 | 0.946929 | 0.889691 | 0.373632 | 0.474955 | 2.168345 | 7.116354 | 7.653045 | 11.16063 | 14.97377 | 5.024897 |
| 16815 FGF11    | 25.34533 | 0.842439 | 0.553203 | 1.522839 | 0.127799 | 0.202052 | 16.80468 | 14.78012 | 22.2634  | 26.78552 | 51.33866 | 20.09959 |
| 21038 LOC11961 | 6.576937 | 0.842356 | 0.962529 | 0.87515  | 0.381493 | 0.482079 | 5.420864 | 3.831883 | 4.87012  | 4.464254 | 12.83466 | 8.039836 |
| 14815 SPTBN2   | 53.82436 | 0.842346 | 0.450504 | 1.869786 | 0.061514 | 0.110384 | 28.18849 | 42.15071 | 43.83108 | 80.35657 | 96.25998 | 32.15934 |
| 2096 LOC10322  | 5824.383 | 0.84224  | 0.10795  | 7.802149 | 6.09E-15 | 7.72E-14 | 4467.876 | 3686.819 | 4361.54  | 7566.91  | 6932.858 | 7930.293 |
| 11616 RPA4     | 60.8348  | 0.842065 | 0.338115 | 2.490466 | 0.012758 | 0.029195 | 49.32986 | 41.6033  | 38.96096 | 73.66019 | 94.12087 | 67.33362 |
| 21821 LOC10323 | 4.681843 | 0.842047 | 1.112367 | 0.756987 | 0.449058 | 0.547097 | 2.168345 | 3.831883 | 4.174388 | 4.464254 | 6.417332 | 7.034856 |
| 20028 LOC10324 | 10.30215 | 0.84199  | 0.823013 | 1.023058 | 0.30628  | 0.406554 | 7.047123 | 7.663765 | 6.957314 | 24.5534  | 8.556443 | 7.034856 |
| 8499 LOC10323  | 114.8592 | 0.84181  | 0.258506 | 3.256439 | 0.001128 | 0.003529 | 68.84497 | 93.60742 | 84.1835  | 165.1774 | 132.6249 | 144.717  |
| 20010 DPYS     | 9.083135 | 0.841374 | 0.818751 | 1.027631 | 0.304123 | 0.404054 | 8.131296 | 4.926706 | 6.261582 | 11.16063 | 14.97377 | 9.044815 |
| 3273 RHOC      | 10788.63 | 0.841372 | 0.138641 | 6.068705 | 1.29E-09 | 1.05E-08 | 8490.699 | 5945.44  | 8752.301 | 14314.63 | 12980.12 | 14248.6  |
| 3229 LOC10322  | 626.8933 | 0.841066 | 0.137139 | 6.132935 | 8.63E-10 | 7.10E-09 | 449.9317 | 477.3431 | 416.7431 | 874.9938 | 810.7229 | 731.6251 |
| 8670 PCDH10    | 126.4931 | 0.840646 | 0.261802 | 3.211002 | 0.001323 | 0.004056 | 72.09749 | 109.4824 | 89.74935 | 151.7846 | 186.1026 | 149.7419 |
| 15213 LOC11962 | 33.49003 | 0.840354 | 0.468445 | 1.793921 | 0.072826 | 0.127264 | 27.6464  | 18.612   | 26.43779 | 26.78552 | 49.19955 | 52.25893 |
| 15997 FILIP1   | 27.08841 | 0.840335 | 0.504382 | 1.666067 | 0.0957   | 0.159041 | 15.7205  | 22.9913  | 18.78475 | 42.41041 | 38.50399 | 24.11951 |
| 3826 FIGN      | 486.3977 | 0.840259 | 0.15224  | 5.519308 | 3.40E-08 | 2.36E-07 | 330.1306 | 398.5158 | 317.2535 | 587.0494 | 650.2896 | 635.147  |
| 5268 MFSD3     | 779.5892 | 0.83997  | 0.185012 | 4.540091 | 5.62E-06 | 2.84E-05 | 630.9885 | 412.2011 | 636.5942 | 966.511  | 868.4789 | 1162.761 |
| 8580 LOC11962  | 101.4197 | 0.839775 | 0.259664 | 3.234086 | 0.00122  | 0.003781 | 81.31296 | 66.78424 | 70.26887 | 124.9991 | 130.4858 | 134.6672 |
| 24671 LOC11961 | 0.820666 | 0.839515 | 2.755528 | 0.304666 | 0.760621 | 0.81963  | 1.084173 | 0        | 0.695731 | 0        | 2.139111 | 1.004979 |
| 24660 FAM237A  | 0.836168 | 0.839496 | 2.740596 | 0.306319 | 0.759362 | 0.818639 | 1.084173 | 0        | 0.695731 | 2.232127 | 0        | 1.004979 |
| 10864 LOC11962 | 70.5111  | 0.839482 | 0.315994 | 2.656641 | 0.007892 | 0.019313 | 42.82482 | 52.55153 | 57.04997 | 75.89232 | 96.25998 | 98.48799 |
| 2938 AKIRIN2   | 644.3778 | 0.839395 | 0.129131 | 6.500332 | 8.01E-11 | 7.25E-10 | 449.9317 | 471.869  | 466.8357 | 754.4589 | 842.8096 | 880.362  |
| 22128 PROM1    | 4.742996 | 0.838914 | 1.191527 | 0.704066 | 0.481392 | 0.578327 | 1.626259 | 1.642235 | 6.957314 | 8.928508 | 4.278221 | 5.024897 |
| 2475 ZNF441    | 948.6993 | 0.8388   | 0.117164 | 7.159217 | 8.11E-13 | 8.72E-12 | 653.2141 | 700.1397 | 688.7741 | 1120.528 | 1298.44  | 1231.1   |
| 23368 LOC10321 | 3.302438 | 0.838772 | 1.664886 | 0.503802 | 0.614401 | 0.698987 | 0        | 3.831883 | 3.478657 | 4.464254 | 0        | 8.039836 |
| 1739 RELN      | 26465.27 | 0.83867  | 0.097291 | 8.620182 | 6.68E-18 | 1.02E-16 | 18513.33 | 20314.45 | 18124.5  | 33100.21 | 31618.19 | 37120.93 |
| 20285 LOC10323 | 9.654182 | 0.838101 | 0.854705 | 0.980574 | 0.326803 | 0.428299 | 9.215468 | 5.474118 | 5.565851 | 13.39276 | 19.252   | 5.024897 |
| 21323 LOC11962 | 6.063084 | 0.838039 | 1.011022 | 0.828902 | 0.40716  | 0.507637 | 4.336691 | 6.568942 | 2.087194 | 8.928508 | 6.417332 | 8.039836 |
| 23604 EPYC     | 1.657722 | 0.837615 | 1.791228 | 0.467621 | 0.640056 | 0.720841 | 1.626259 | 0.547412 | 1.391463 | 2.232127 | 2.139111 | 2.009959 |
| 18189 LOC11962 | 15.96499 | 0.837107 | 0.642491 | 1.302908 | 0.192606 | 0.281497 | 11.9259  | 8.211177 | 14.61036 | 13.39276 | 23.53022 | 24.11951 |
| 21985 LOC10322 | 4.706459 | 0.837069 | 1.146533 | 0.730087 | 0.465337 | 0.562701 | 2.168345 | 4.926706 | 2.782925 | 8.928508 | 6.417332 | 3.014938 |
| 18202 LOC11962 | 23.41549 | 0.836991 | 0.643178 | 1.301335 | 0.193144 | 0.282097 | 10.84173 | 21.89647 | 16.69755 | 44.64254 | 36.36488 | 10.04979 |
| 5936 SLC17A9   | 220.6535 | 0.836924 | 0.199633 | 4.192322 | 2.76E-05 | 0.000124 | 174.5518 | 130.8314 | 169.7585 | 290.1765 | 280.2235 | 278.3793 |
| 20305 BANK1    | 10.25688 | 0.83683  | 0.855782 | 0.977854 | 0.328147 | 0.429617 | 4.336691 | 10.94824 | 6.261582 | 17.85702 | 17.11289 | 5.024897 |
| 19559 ACTG2    | 11.25581 | 0.836812 | 0.768031 | 1.089555 | 0.275909 | 0.375025 | 10.29964 | 8.758589 | 4.87012  | 11.16063 | 21.39111 | 11.05477 |
| 24056 LOC11962 | 1.358767 | 0.836743 | 2.109323 | 0.396688 | 0.691598 | 0.764305 | 1.626259 | 0.547412 | 0.695731 | 0        | 4.278221 | 1.004979 |
| 7145 SORL1     | 143.331  | 0.836565 | 0.227177 | 3.682433 | 0.000231 | 0.00086  | 102.9964 | 109.4824 | 94.61947 | 196.4272 | 194.6591 | 161.8017 |
| 13990 LOC10324 | 41.89268 | 0.83624  | 0.415635 | 2.011959 | 0.044224 | 0.084039 | 38.48813 | 24.08612 | 27.13352 | 49.10679 | 66.31243 | 46.22906 |
| 24511 LOC11962 | 0.821553 | 0.835733 | 2.534849 | 0.329697 | 0.741629 | 0.804346 | 0.542086 | 0.547412 | 0.695731 | 0        | 2.139111 | 1.004979 |
| 24513 LOC11962 | 0.821553 | 0.835733 | 2.534849 | 0.329697 | 0.741629 | 0.804346 | 0.542086 | 0.547412 | 0.695731 | 0        | 2.139111 | 1.004979 |
| 24497 LOC10324 | 0.837056 | 0.835722 | 2.522551 | 0.3313   | 0.740418 | 0.803494 | 0.542086 | 0.547412 | 0.695731 | 2.232127 | 0        | 1.004979 |
| 3646 ALDH5A1   | 467.3946 | 0.835643 | 0.146594 | 5.700394 | 1.20E-08 | 8.72E-08 | 338.804  | 363.4814 | 303.3389 | 636.1562 | 579.699  | 582.8881 |
| 14937 LYL1     | 36.49123 | 0.835534 | 0.452283 | 1.847369 | 0.064694 | 0.115142 | 31.9831  | 16.96977 | 29.22072 | 49.10679 | 53.47777 | 38.18922 |
| 1857 ATP1B1    | 13947.58 | 0.834804 | 0.100754 | 8.285527 | 1.18E-16 | 1.68E-15 | 9453.986 | 11007.9  | 9605.963 | 17283.36 | 16982.4  | 19351.88 |
| 5645 SLC14A1   | 213.3281 | 0.834448 | 0.191854 | 4.3494   | 1.37E-05 | 6.43E-05 | 162.6259 | 162.5813 | 134.2762 | 272.3195 | 273.8062 | 274.3594 |
| 22684 LOC10323 | 3.018264 | 0.833983 | 1.367358 | 0.609923 | 0.541913 | 0.635106 | 2.168345 | 2.189647 | 2.087194 | 2.232127 | 6.417332 | 3.014938 |
| 6857 ZFP28     | 197.2418 | 0.833677 | 0.219781 | 3.793208 | 0.000149 | 0.000577 | 126.8482 | 176.2666 | 122.4487 | 243.3018 | 250.2759 | 264.3096 |
| 1496 OSTM1     | 2819.269 | 0.833577 | 0.09005  | 9.256794 | 2.11E-20 | 3.74E-19 | 2000.841 | 2108.63  | 1969.616 | 3558.01  | 3702.801 | 3575.717 |
| 4814 ADCK1     | 352.4164 | 0.833525 | 0.17346  | 4.805291 | 1.55E-06 | 8.53E-06 | 263.454  | 231.0078 | 268.5523 | 450.8897 | 385.0399 | 515.5545 |
| 1638 MANBA     | 2361.923 | 0.833484 | 0.093874 | 8.878774 | 6.76E-19 | 1.10E-17 | 1664.747 | 1788.942 | 1641.23  | 2999.979 | 2988.338 | 3088.302 |
| 20414 GABRA1   | 8.872626 | 0.833467 | 0.868983 | 0.959129 | 0.337494 | 0.439494 | 5.96295  | 3.831883 | 9.044508 | 13.39276 | 14.97377 | 6.029877 |
| 11757 VSIG10L  | 78.3454  | 0.833425 | 0.339135 | 2.457503 | 0.013991 | 0.031636 | 42.28274 | 60.76271 | 64.70302 | 131.6955 | 96.25998 | 74.36848 |
| 19697 TEX45    | 10.79463 | 0.833292 | 0.778366 | 1.070566 | 0.284365 | 0.383806 | 7.047123 | 8.758589 | 6.957314 | 17.85702 | 17.11289 | 7.034856 |
| 22182 LOC11962 | 4.460567 | 0.832857 | 1.199189 | 0.694517 | 0.487358 | 0.584101 | 3.794605 | 2.737059 | 2.782925 | 11.16063 | 4.278221 | 2.009959 |
| 16604 LOC11962 | 22.87187 | 0.832583 | 0.534876 | 1.556591 | 0.119568 | 0.191442 | 15.17842 | 15.87494 | 18.08902 | 22.32127 | 40.6431  | 25.12449 |
| 24063 LOC10321 | 1.360542 | 0.832379 | 2.108936 | 0.394691 | 0.693071 | 0.765584 | 0.542086 | 1.642235 | 0.695731 | 0        | 4.278221 | 1.004979 |
| 24681 LOC11962 | 0.822441 | 0.832312 | 2.754111 | 0.302207 | 0.762494 | 0.821316 | 0        | 1.094824 | 0.695731 | 0        | 2.139111 | 1.004979 |
| 18982 LOC11962 | 15.3847  | 0.832017 | 0.700583 | 1.187607 | 0.234988 | 0.329098 | 5.96295  | 16.96977 | 10.43597 | 11.16063 | 25.66933 | 22.10955 |
| 3133 PAQR7     | 1018.865 | 0.831749 | 0.133299 | 6.239717 | 4.38E-10 | 3.72E-09 | 777.3519 | 677.1484 | 747.9112 | 1354.901 | 1118.755 | 1437.121 |
| 20445 LOC10323 | 8.000175 | 0.831686 | 0.870676 | 0.955218 | 0.339467 | 0.441415 | 6.505036 | 7.116354 | 3.478657 | 11.16063 | 10.69555 | 9.044815 |
| 7039 LOC10321  | 309.3857 | 0.831631 | 0.22373  | 3.717114 | 0.000202 |          |          |          |          |          |          |          |



|       |            |          |          |          |          |          |          |          |          |          |          |          |          |
|-------|------------|----------|----------|----------|----------|----------|----------|----------|----------|----------|----------|----------|----------|
| 20289 | LOC119623  | 9.393839 | 0.830834 | 0.847915 | 0.979855 | 0.327158 | 0.428868 | 11.38381 | 3.831883 | 4.87012  | 13.39276 | 12.83466 | 10.04979 |
| 10037 | LOC119623  | 116.4581 | 0.8308   | 0.291078 | 2.854215 | 0.004314 | 0.011428 | 105.1648 | 59.12048 | 88.35788 | 140.624  | 132.6249 | 172.8565 |
| 19221 | LOC10324   | 12.20432 | 0.830517 | 0.721789 | 1.150636 | 0.249882 | 0.345618 | 10.84173 | 8.211177 | 6.957314 | 22.32127 | 12.83466 | 12.05975 |
| 16173 | LOC119623  | 38.31373 | 0.82996  | 0.508575 | 1.631933 | 0.102694 | 0.168807 | 36.86187 | 11.49565 | 34.09084 | 58.0353  | 49.19955 | 40.19918 |
| 14378 | ITGAM      | 38.13005 | 0.829776 | 0.425873 | 1.948413 | 0.051366 | 0.094977 | 24.39389 | 32.84471 | 24.3506  | 49.10679 | 59.8951  | 38.18922 |
| 2021  | PTEN       | 6776.637 | 0.829578 | 0.104532 | 7.936121 | 2.09E-15 | 2.74E-14 | 4621.286 | 5529.407 | 4490.25  | 8591.457 | 8573.556 | 8853.869 |
| 16797 | NR2E1      | 23.65103 | 0.8293   | 0.543398 | 1.526136 | 0.126976 | 0.200968 | 21.14137 | 14.23271 | 16.00182 | 17.85702 | 38.50399 | 34.1693  |
| 22622 | LOC10322   | 4.973686 | 0.828997 | 1.334694 | 0.621114 | 0.534525 | 0.628137 | 4.336691 | 3.284471 | 2.782925 | 4.464254 | 14.97377 | 0        |
| 2220  | PROCR      | 1076.39  | 0.828973 | 0.109603 | 7.563412 | 3.93E-14 | 4.70E-13 | 765.426  | 822.2125 | 738.171  | 1383.919 | 1364.753 | 1383.857 |
| 4250  | TMEM59     | 5255.564 | 0.828913 | 0.159786 | 5.18764  | 2.13E-07 | 1.33E-06 | 4266.22  | 2679.033 | 4413.72  | 6557.989 | 6823.763 | 6792.656 |
| 3501  | ZMYND10    | 511.5838 | 0.828447 | 0.141554 | 5.852516 | 4.84E-09 | 3.68E-08 | 396.2651 | 332.8264 | 377.7821 | 656.2453 | 631.0376 | 675.3462 |
| 11954 | LOC119623  | 196.5193 | 0.828438 | 0.343264 | 2.413414 | 0.015804 | 0.035147 | 81.31296 | 238.6716 | 104.3597 | 294.6408 | 213.9111 | 246.22   |
| 15915 | CUNH7orf   | 33.78555 | 0.828304 | 0.492423 | 1.682097 | 0.09255  | 0.154599 | 31.44101 | 20.25424 | 21.56767 | 12.32127 | 59.8951  | 47.23404 |
| 6539  | DGLUCY     | 160.2002 | 0.828005 | 0.211001 | 3.924169 | 8.70E-05 | 0.000354 | 123.0536 | 106.7453 | 116.8829 | 209.8199 | 194.6591 | 210.0407 |
| 21733 | LOC119623  | 6.924102 | 0.827965 | 1.072431 | 0.772045 | 0.440088 | 0.538357 | 0.542086 | 8.211177 | 6.261582 | 8.928508 | 8.556443 | 9.044815 |
| 21191 | PPP1R42    | 6.62716  | 0.827482 | 0.971311 | 0.851923 | 0.394257 | 0.494612 | 4.878777 | 4.926706 | 4.174388 | 8.928508 | 12.83466 | 4.019918 |
| 29144 | LOC119623  | 0.537214 | 0.827482 | 3.980645 | 0.207876 | 0.835325 | NA       | 1.084173 | 0        | 0        | 0        | 2.139111 | 0        |
| 29349 | LOC10323   | 0.537214 | 0.827482 | 3.980645 | 0.207876 | 0.835325 | NA       | 1.084173 | 0        | 0        | 0        | 2.139111 | 0        |
| 2224  | FAM219A    | 2141.522 | 0.827481 | 0.109458 | 7.559811 | 4.04E-14 | 4.83E-13 | 1488.027 | 1663.037 | 1483.299 | 2752.213 | 2504.899 | 2957.655 |
| 3593  | LOC10324   | 502.6355 | 0.827395 | 0.143807 | 5.753508 | 8.74E-09 | 6.47E-08 | 370.7871 | 343.7746 | 375.6949 | 589.2815 | 626.7594 | 709.5155 |
| 3655  | PEDS1      | 1480.898 | 0.827376 | 0.145332 | 5.693003 | 1.25E-08 | 9.08E-08 | 934.5569 | 1307.219 | 962.1965 | 1787.934 | 1867.444 | 2026.039 |
| 3166  | ACVR1B     | 1326.105 | 0.826821 | 0.13334  | 6.200868 | 5.62E-10 | 4.72E-09 | 882.5166 | 1101.393 | 887.0575 | 1700.881 | 1531.603 | 1853.182 |
| 1718  | ATP13A3    | 17210.34 | 0.826768 | 0.095196 | 8.684915 | 3.79E-18 | 5.87E-17 | 12131.35 | 13129.67 | 11973.54 | 20888.24 | 21048.85 | 24090.36 |
| 26729 | LOC11961   | 0.552717 | 0.826563 | 3.94086  | 0.209742 | 0.833869 | NA       | 1.084173 | 0        | 0        | 2.232127 | 0        | 0        |
| 27647 | TRNAV-UA   | 0.552717 | 0.826563 | 3.94086  | 0.209742 | 0.833869 | NA       | 1.084173 | 0        | 0        | 2.232127 | 0        | 0        |
| 29447 | LOC119623  | 0.552717 | 0.826563 | 3.94086  | 0.209742 | 0.833869 | NA       | 1.084173 | 0        | 0        | 2.232127 | 0        | 0        |
| 1930  | FGFR1      | 4757.98  | 0.825863 | 0.101526 | 8.134514 | 4.14E-16 | 5.70E-15 | 3493.205 | 3465.664 | 3343.685 | 5848.173 | 5621.583 | 6775.572 |
| 16141 | TRNAS-AG   | 26.79619 | 0.825394 | 0.503555 | 1.639134 | 0.101185 | 0.166637 | 22.22554 | 13.6853  | 22.2634  | 26.78552 | 40.6431  | 35.17428 |
| 23717 | TRNAS-UG   | 2.461997 | 0.825389 | 1.826918 | 0.451793 | 0.651418 | 0.730241 | 3.252518 | 0        | 2.087194 | 0        | 6.417332 | 3.014938 |
| 22238 | LOC119623  | 4.194497 | 0.825032 | 1.203    | 0.685812 | 0.492832 | 0.589168 | 2.710432 | 2.189647 | 4.174388 | 8.928508 | 2.139111 | 5.024897 |
| 3897  | ABHD14A    | 546.9578 | 0.824744 | 0.151395 | 5.447634 | 5.10E-08 | 3.48E-07 | 368.6187 | 406.1796 | 412.5687 | 720.977  | 592.5337 | 780.869  |
| 19498 | ACTL6B     | 16.27595 | 0.824702 | 0.748964 | 1.101124 | 0.270843 | 0.369287 | 5.96295  | 10.40082 | 18.78475 | 8.928508 | 38.50399 | 15.07469 |
| 4462  | LOC11962   | 15720.95 | 0.824633 | 0.163792 | 5.034623 | 4.79E-07 | 2.85E-06 | 12658.8  | 9483.362 | 11902.57 | 20073.52 | 15151.32 | 25056.15 |
| 2539  | FUT10      | 1028.434 | 0.82456  | 0.116679 | 7.066907 | 1.58E-12 | 1.66E-11 | 713.3857 | 793.1997 | 717.299  | 1397.311 | 1311.275 | 1238.135 |
| 2367  | KCTD17     | 1024.914 | 0.824109 | 0.112633 | 7.316746 | 2.54E-13 | 2.85E-12 | 745.3688 | 720.3939 | 756.9557 | 1308.026 | 1227.85  | 1390.892 |
| 5758  | LOC10324   | 355.4902 | 0.823994 | 0.191781 | 4.296535 | 1.73E-05 | 8.01E-05 | 295.9792 | 203.6372 | 272.7267 | 412.9435 | 432.1004 | 515.5545 |
| 2084  | ACAP2      | 6233.666 | 0.823698 | 0.105294 | 7.822807 | 5.17E-15 | 6.59E-14 | 4369.758 | 5049.874 | 4084.639 | 7685.213 | 7876.205 | 8336.305 |
| 10369 | LOC119623  | 80.3304  | 0.823259 | 0.297088 | 2.771091 | 0.005587 | 0.014324 | 58.54533 | 60.76271 | 55.65851 | 107.1421 | 81.28621 | 118.5876 |
| 20979 | LOC119623  | 7.706    | 0.822917 | 0.933426 | 0.881609 | 0.377988 | 0.478994 | 9.215468 | 3.831883 | 3.478657 | 6.696381 | 14.97377 | 8.039836 |
| 21012 | NPFFR2     | 7.517267 | 0.822841 | 0.936685 | 0.87846  | 0.379694 | 0.480632 | 3.436691 | 8.211177 | 3.478657 | 15.62489 | 6.417332 | 7.034856 |
| 3190  | GIN54      | 578.562  | 0.822533 | 0.133181 | 6.176039 | 6.57E-10 | 5.48E-09 | 396.2651 | 450.5199 | 408.3943 | 729.9055 | 714.463  | 771.8242 |
| 16826 | LOC10324   | 22.95821 | 0.822487 | 0.540962 | 1.520415 | 0.128407 | 0.202882 | 20.0572  | 12.59047 | 16.69755 | 26.78552 | 38.50399 | 23.11453 |
| 16531 | FAM166B    | 24.89543 | 0.822476 | 0.523934 | 1.569807 | 0.11646  | 0.18729  | 17.34676 | 15.32753 | 20.87194 | 26.78552 | 44.92132 | 24.11951 |
| 11271 | LOC10323   | 67.7311  | 0.822411 | 0.320661 | 2.564739 | 0.101325 | 0.024354 | 44.45108 | 49.81448 | 51.48412 | 100.4457 | 89.84265 | 70.34856 |
| 23131 | LOC119623  | 2.491583 | 0.822333 | 1.523732 | 0.539684 | 0.589415 | 0.677429 | 2.168345 | 1.642235 | 1.391463 | 4.464254 | 4.278221 | 1.004979 |
| 11883 | LOC10323   | 58.9122  | 0.821726 | 0.338318 | 2.428856 | 0.015147 | 0.033886 | 46.61943 | 37.224   | 43.83108 | 64.73168 | 87.70354 | 73.3635  |
| 7250  | S1PR3      | 160.0701 | 0.821513 | 0.224872 | 3.653241 | 0.000259 | 0.00095  | 109.5014 | 132.4737 | 104.3597 | 232.1412 | 183.9635 | 197.981  |
| 1610  | MAF1       | 5927.169 | 0.821433 | 0.091742 | 8.953732 | 3.44E-19 | 5.67E-18 | 4427.761 | 3973.115 | 4454.072 | 7546.821 | 7309.341 | 7851.905 |
| 23858 | LOC119623  | 1.643994 | 0.821348 | 1.914499 | 0.429015 | 0.667913 | 0.74423  | 0.542086 | 1.642235 | 1.391463 | 0        | 4.278221 | 2.009959 |
| 19066 | LOC119623  | 17.45445 | 0.821279 | 0.699063 | 1.174829 | 0.240063 | 0.334736 | 17.34676 | 9.306001 | 10.43597 | 20.08914 | 38.50399 | 9.044815 |
| 22347 | LOC119623  | 4.120074 | 0.821052 | 1.230604 | 0.667194 | 0.504648 | 0.600352 | 2.710432 | 3.284471 | 2.782925 | 2.232127 | 10.69555 | 3.014938 |
| 1941  | PLEKHA1    | 2152.754 | 0.821007 | 0.101179 | 8.114427 | 4.88E-16 | 6.69E-15 | 1625.717 | 1613.223 | 1430.424 | 2694.177 | 2720.949 | 2832.032 |
| 3079  | RASL11A    | 755.7912 | 0.820965 | 0.13024  | 6.303471 | 2.91E-10 | 2.51E-09 | 588.1637 | 495.4077 | 557.9766 | 946.4218 | 917.6785 | 1029.099 |
| 20453 | LOC119623  | 8.838448 | 0.820868 | 0.860951 | 0.953443 | 0.340366 | 0.44241  | 9.215468 | 7.116354 | 2.782925 | 11.16063 | 10.69555 | 12.05975 |
| 1285  | LAMP2      | 5644.075 | 0.819887 | 0.082834 | 9.89797  | 4.25E-23 | 8.79E-22 | 3937.173 | 4192.627 | 4118.034 | 7196.377 | 7103.987 | 7316.251 |
| 3284  | UNC5A      | 842.4481 | 0.81984  | 0.135391 | 6.055331 | 1.40E-09 | 1.13E-08 | 592.5004 | 649.7778 | 589.2845 | 1080.349 | 934.7914 | 1207.985 |
| 2361  | RIPK1      | 2149.621 | 0.819817 | 0.11191  | 7.325682 | 2.38E-13 | 2.68E-12 | 1489.653 | 1730.369 | 1446.426 | 2720.963 | 2596.88  | 2913.435 |
| 17663 | LOC119623  | 19.59365 | 0.819318 | 0.587802 | 1.393867 | 0.163358 | 0.245873 | 16.80468 | 16.42235 | 9.044508 | 20.08914 | 32.08666 | 23.11453 |
| 16450 | LOC10322   | 27.71358 | 0.818941 | 0.518441 | 1.579622 | 0.114194 | 0.184549 | 12.46799 | 19.70683 | 28.52499 | 29.01765 | 36.36488 | 40.19918 |
| 4262  | PHF11      | 327.8072 | 0.818827 | 0.158039 | 5.181157 | 2.21E-07 | 1.38E-06 | 228.2184 | 249.6198 | 232.3743 | 428.5684 | 432.1004 | 395.9619 |
| 3375  | PHETA1     | 529.3276 | 0.81881  | 0.137303 | 5.963522 | 2.47E-09 | 1.94E-08 | 381.0867 | 373.3349 | 397.2626 | 676.3345 | 620.3421 | 727.6051 |
| 3429  | DENND4A    | 2017.855 | 0.818219 | 0.13827  | 5.917563 | 3.27E-09 | 2.53E-08 | 1351.421 | 1777.446 | 1253.012 | 2520.071 | 2519.872 | 2685.305 |
| 4831  | NR2F2      | 1369.951 | 0.817727 | 0.170554 | 4.794525 | 1.63E-06 | 8.97E-06 | 791.4461 | 1304.482 | 878.7087 | 1801.326 | 1709.149 | 1734.595 |
| 16825 | LOC119623  | 27.17763 | 0.816619 | 0.537084 | 1.520466 | 0.128394 | 0.202874 | 20.59928 | 23.53871 | 13.91463 | 35.71403 | 49.19955 | 20.09959 |
| 20517 | SCGB3A2    | 9.446439 | 0.816592 | 0.866197 | 0.942733 | 0.345817 | 0.447515 | 5.420864 | 4.379295 | 10.43597 | 11.16063 | 19.252   | 6.029877 |
| 16584 | LOC119623  | 23.56569 | 0.816069 | 0.523091 | 1.56009  | 0.118739 | 0.190344 | 17.88885 | 14.78012 | 18.08902 | 29.01765 | 38.50399 | 23.11453 |
| 10365 | LRRC29     | 76.82173 | 0.815742 | 0.294184 | 2.772902 | 0.005556 | 0.01425  | 61.79785 | 55.28859 | 49.39693 | 100.4457 | 100.5382 | 93.46309 |
| 27173 | LOC119623  | 0.538989 | 0.815298 | 3.976081 | 0.205051 | 0.837533 | NA       | 0        | 1.094824 | 0        | 0        | 2.139111 | 0        |
| 28283 | LOC10322   | 0.538989 | 0.815298 | 3.976081 | 0.205051 | 0.837533 | NA       | 0        | 1.094824 | 0        | 0        | 2.139111 | 0        |
| 28456 | MAGEB5     | 0.538989 | 0.815298 | 3.976081 | 0.205051 | 0.837533 | NA       | 0        | 1.094824 | 0        | 0        | 2.139111 | 0        |
| 28473 | LOC11962   | 0.538989 | 0.815298 | 3.976081 | 0.205051 | 0.837533 | NA       | 0        | 1.094824 | 0        | 0        | 2.139111 | 0        |
| 21669 | LOC10321</ |          |          |          |          |          |          |          |          |          |          |          |          |



|       |           |          |          |          |          |          |          |          |          |          |          |          |          |
|-------|-----------|----------|----------|----------|----------|----------|----------|----------|----------|----------|----------|----------|----------|
| 21260 | LOC103245 | 6.663821 | 0.814422 | 0.968566 | 0.840853 | 0.40043  | 0.500703 | 4.336691 | 7.116354 | 2.782925 | 11.16063 | 8.556443 | 6.029877 |
| 27109 | LOC103245 | 0.554492 | 0.814421 | 3.936499 | 0.20689  | 0.836096 | NA       | 0        | 1.094824 | 0        | 2.232127 | 0        | 0        |
| 28445 | LOC103235 | 0.554492 | 0.814421 | 3.936499 | 0.20689  | 0.836096 | NA       | 0        | 1.094824 | 0        | 2.232127 | 0        | 0        |
| 28484 | SLAH3     | 0.554492 | 0.814421 | 3.936499 | 0.20689  | 0.836096 | NA       | 0        | 1.094824 | 0        | 2.232127 | 0        | 0        |
| 29600 | LOC119625 | 0.554492 | 0.814421 | 3.936499 | 0.20689  | 0.836096 | NA       | 0        | 1.094824 | 0        | 2.232127 | 0        | 0        |
| 21890 | LOC119625 | 4.996986 | 0.814394 | 1.092215 | 0.745636 | 0.455888 | 0.553667 | 2.710432 | 5.474118 | 2.782925 | 6.696381 | 4.278221 | 8.039836 |
| 10762 | LOC119625 | 76.46068 | 0.814358 | 0.304176 | 2.677257 | 0.007423 | 0.018336 | 57.46116 | 53.64636 | 55.65851 | 111.6063 | 74.86887 | 105.5228 |
| 2508  | SLC12A7   | 3230.686 | 0.81406  | 0.114341 | 7.119589 | 1.08E-12 | 1.15E-11 | 2441.557 | 2166.109 | 2426.015 | 4053.543 | 3674.992 | 4621.901 |
| 1962  | ZNF7      | 2470.35  | 0.814024 | 0.100913 | 8.06659  | 7.23E-16 | 9.80E-15 | 1833.878 | 1877.075 | 1665.581 | 3073.639 | 3035.398 | 3336.532 |
| 12547 | LOC103225 | 51.02895 | 0.813677 | 0.354775 | 2.293499 | 0.021819 | 0.046231 | 33.06727 | 41.05589 | 36.87376 | 60.26743 | 70.59065 | 64.31869 |
| 16334 | LOC103225 | 26.92425 | 0.813656 | 0.508767 | 1.59927  | 0.109761 | 0.178645 | 14.63633 | 17.51718 | 26.43779 | 29.01765 | 42.78221 | 31.15436 |
| 22261 | LOC103235 | 4.486175 | 0.813571 | 1.193628 | 0.681596 | 0.495495 | 0.59174  | 3.252518 | 2.737059 | 3.478657 | 11.16063 | 4.278221 | 2.009959 |
| 13233 | ADM       | 50.14247 | 0.81349  | 0.376336 | 2.161606 | 0.030649 | 0.061573 | 36.31979 | 37.224   | 35.4823  | 82.5887  | 44.92132 | 64.31869 |
| 13760 | LOC119625 | 71.85514 | 0.813477 | 0.395854 | 2.054993 | 0.03988  | 0.077049 | 49.87195 | 35.58177 | 69.57314 | 111.6063 | 111.2338 | 53.26391 |
| 13712 | RTN4R     | 53.35122 | 0.813044 | 0.393373 | 2.066853 | 0.038748 | 0.075128 | 49.32986 | 28.46541 | 38.96096 | 75.89232 | 47.06043 | 80.39836 |
| 2057  | FHOD1     | 2213.435 | 0.812985 | 0.103222 | 7.876077 | 3.38E-15 | 4.37E-14 | 1637.643 | 1617.602 | 1566.787 | 2758.909 | 2620.411 | 3079.257 |
| 22942 | LOC119615 | 3.628421 | 0.812853 | 1.418852 | 0.572895 | 0.566716 | 0.656705 | 1.084173 | 1.094824 | 5.565851 | 4.464254 | 8.556443 | 1.004979 |
| 18288 | ECM2      | 21.44241 | 0.812752 | 0.632342 | 1.285305 | 0.198686 | 0.288826 | 7.047123 | 16.96977 | 22.2634  | 26.78552 | 38.50399 | 17.08465 |
| 20811 | CUNH11or  | 8.05978  | 0.812576 | 0.900032 | 0.90283  | 0.366616 | 0.468315 | 7.047123 | 7.663765 | 2.782925 | 13.39276 | 6.417332 | 11.05477 |
| 19969 | LOC103245 | 10.58602 | 0.81257  | 0.785596 | 1.034336 | 0.300979 | 0.400697 | 7.047123 | 9.853413 | 6.261582 | 17.85702 | 6.417332 | 16.07967 |
| 16805 | LOC103235 | 26.09867 | 0.812212 | 0.532784 | 1.524469 | 0.127392 | 0.20153  | 13.55216 | 22.44388 | 20.17621 | 31.24978 | 47.06043 | 22.10955 |
| 3223  | FBXO25    | 588.6862 | 0.812109 | 0.132313 | 6.137778 | 8.37E-10 | 6.90E-09 | 417.9486 | 460.9207 | 401.437  | 776.7802 | 744.4105 | 730.6201 |
| 2757  | PRKCH     | 673.0029 | 0.811986 | 0.120064 | 6.762959 | 1.35E-11 | 1.30E-10 | 485.1673 | 498.6922 | 480.7504 | 868.2974 | 859.9225 | 845.1877 |
| 2726  | ZNF250    | 873.2388 | 0.811936 | 0.119218 | 6.81054  | 9.72E-12 | 9.48E-11 | 635.8673 | 596.1315 | 593.4589 | 1002.225 | 1063.138 | 1132.612 |
| 11798 | NRG3      | 85.59125 | 0.811904 | 0.331468 | 2.449419 | 0.014309 | 0.032242 | 57.46116 | 79.92212 | 50.09266 | 75.89232 | 115.512  | 134.6672 |
| 7440  | LOC119625 | 141.8926 | 0.811289 | 0.226292 | 3.585136 | 0.000337 | 0.001204 | 116.0065 | 95.24966 | 98.09812 | 180.8023 | 173.268  | 187.9312 |
| 17810 | LOC119625 | 19.36512 | 0.811173 | 0.589556 | 1.375904 | 0.168851 | 0.252436 | 14.63633 | 18.612   | 9.044508 | 20.08914 | 25.66933 | 28.13943 |
| 10141 | PTPA43    | 115.0599 | 0.811162 | 0.286697 | 2.82934  | 0.004664 | 0.012228 | 95.4072  | 66.78424 | 86.96642 | 138.3919 | 188.2417 | 114.5677 |
| 20067 | PKLR      | 9.992919 | 0.811121 | 0.796796 | 1.017978 | 0.308688 | 0.408953 | 4.878777 | 10.40082 | 6.261582 | 13.39276 | 14.97377 | 10.04979 |
| 18580 | LOC119625 | 19.45776 | 0.810758 | 0.654816 | 1.238146 | 0.215662 | 0.308578 | 22.76763 | 9.853413 | 9.044508 | 26.78552 | 34.22577 | 14.06971 |
| 4195  | TBC1D8    | 449.5808 | 0.810598 | 0.155237 | 5.22168  | 1.77E-07 | 1.12E-06 | 333.9252 | 345.9643 | 301.2517 | 595.9779 | 496.2737 | 624.0923 |
| 3789  | LOC119625 | 2108.301 | 0.810586 | 0.145912 | 5.55529  | 2.77E-08 | 1.94E-07 | 1670.168 | 1238.793 | 1688.54  | 2667.392 | 2350.883 | 3034.033 |
| 22121 | LOC103225 | 5.625319 | 0.810554 | 1.148829 | 0.705548 | 0.48047  | 0.577428 | 2.710432 | 1.094824 | 8.348776 | 11.16063 | 6.417332 | 4.019918 |
| 21512 | LOC119615 | 5.864099 | 0.810215 | 1.010216 | 0.802022 | 0.42254  | 0.522165 | 2.710432 | 3.831883 | 6.261582 | 8.928508 | 6.417332 | 7.034856 |
| 3204  | HOXD4     | 682.8394 | 0.809608 | 0.131441 | 6.159496 | 7.30E-10 | 6.06E-09 | 513.8979 | 507.4508 | 468.2272 | 779.0123 | 921.9567 | 906.4915 |
| 3325  | SPRYD4    | 528.4442 | 0.809516 | 0.134478 | 6.019707 | 1.75E-09 | 1.40E-08 | 401.686  | 389.7572 | 358.9974 | 669.6381 | 697.3501 | 653.2367 |
| 2334  | PNPLA2    | 1224.996 | 0.809453 | 0.109978 | 7.360142 | 1.84E-13 | 2.09E-12 | 880.8904 | 927.3156 | 864.0984 | 1591.507 | 1446.039 | 1640.126 |
| 3499  | LMO7      | 2123.35  | 0.809408 | 0.138279 | 5.853421 | 4.82E-09 | 3.66E-08 | 1389.367 | 1891.855 | 1346.936 | 2700.874 | 2667.471 | 2743.594 |
| 20416 | LOC119615 | 8.607241 | 0.809288 | 0.84418  | 0.958668 | 0.337726 | 0.439775 | 5.420864 | 4.926706 | 8.348776 | 8.928508 | 14.97377 | 9.044815 |
| 20509 | MAOB      | 13.54399 | 0.809124 | 0.856584 | 0.944594 | 0.344866 | 0.447036 | 7.589209 | 10.40082 | 11.1317  | 4.464254 | 40.6431  | 7.034856 |
| 27826 | LOC103215 | 0.553604 | 0.80877  | 3.506228 | 0.230667 | 0.817574 | NA       | 0.542086 | 0.547412 | 0        | 2.232127 | 0        | 0        |
| 29601 | LOC119625 | 0.553604 | 0.80877  | 3.506228 | 0.230667 | 0.817574 | NA       | 0.542086 | 0.547412 | 0        | 2.232127 | 0        | 0        |
| 2390  | CCDC134   | 1120.287 | 0.80852  | 0.11096  | 7.286562 | 3.18E-13 | 3.54E-12 | 838.6076 | 841.372  | 764.6088 | 1404.008 | 1379.726 | 1493.399 |
| 16495 | PTPRN2    | 25.79371 | 0.807671 | 0.512558 | 1.575764 | 0.11508  | 0.185488 | 16.80468 | 16.42235 | 23.65487 | 22.32127 | 36.36488 | 39.1942  |
| 21067 | LOC119615 | 9.506412 | 0.807313 | 0.927369 | 0.870542 | 0.384004 | 0.484579 | 6.505036 | 2.737059 | 11.1317  | 13.39276 | 19.252   | 4.019918 |
| 16648 | POPOC2    | 22.79663 | 0.807146 | 0.521073 | 1.549007 | 0.12138  | 0.19383  | 19.51511 | 15.32753 | 14.61036 | 31.24978 | 29.94755 | 26.12947 |
| 19082 | PTK6      | 15.11178 | 0.806834 | 0.688395 | 1.172051 | 0.241177 | 0.336    | 8.673382 | 7.116354 | 17.39328 | 24.5534  | 12.83466 | 20.09959 |
| 9728  | LOC119615 | 150.6775 | 0.806543 | 0.275964 | 2.922644 | 0.003471 | 0.009485 | 82.93921 | 148.3486 | 97.40239 | 220.9806 | 160.4333 | 193.961  |
| 23116 | TRNAA-AG  | 3.1151   | 0.80654  | 1.490922 | 0.540967 | 0.58853  | 0.67685  | 1.626259 | 1.642235 | 3.478657 | 8.928508 | 0        | 3.014938 |
| 23744 | LOC119625 | 2.216646 | 0.806092 | 1.809014 | 0.445598 | 0.655888 | 0.734366 | 2.710432 | 0.547412 | 1.391463 | 2.232127 | 6.417332 | 0        |
| 1766  | HS3ST1    | 2973.344 | 0.805952 | 0.094249 | 8.551275 | 1.22E-17 | 1.83E-16 | 2097.874 | 2302.414 | 2092.76  | 3658.456 | 3786.226 | 3902.335 |
| 3413  | PYCR3     | 1895.561 | 0.805832 | 0.135791 | 5.934335 | 2.95E-09 | 2.30E-08 | 1545.488 | 1171.461 | 1425.554 | 2381.679 | 2149.806 | 2699.375 |
| 12613 | ADCY10    | 61.14968 | 0.805332 | 0.353187 | 2.280187 | 0.022597 | 0.047631 | 52.04029 | 42.69812 | 37.56949 | 75.89232 | 98.39909 | 60.29877 |
| 2504  | TSC22D2   | 3147.232 | 0.804957 | 0.112959 | 7.126071 | 1.03E-12 | 1.10E-11 | 2111.968 | 2624.292 | 2137.983 | 4055.775 | 3861.095 | 4092.276 |
| 12635 | ANO2      | 67.22872 | 0.804167 | 0.353716 | 2.273479 | 0.022997 | 0.048388 | 54.75072 | 40.50847 | 50.78839 | 69.19594 | 119.7902 | 68.3386  |
| 19158 | LOC119625 | 12.50578 | 0.804161 | 0.693823 | 1.159029 | 0.246444 | 0.341984 | 19.51468 | 7.663765 | 10.43597 | 13.39276 | 19.252   | 15.07469 |
| 12668 | LOC103235 | 53.81899 | 0.804034 | 0.354691 | 2.266856 | 0.023399 | 0.049106 | 41.74065 | 32.2973  | 43.13534 | 78.12444 | 66.31243 | 61.30375 |
| 2323  | VDAC3     | 4653.017 | 0.803935 | 0.108974 | 7.377337 | 1.61E-13 | 1.85E-12 | 3543.619 | 2934.675 | 3688.768 | 6073.618 | 5901.806 | 5775.617 |
| 3780  | HOMEZ     | 2039.756 | 0.803814 | 0.144452 | 5.564593 | 2.63E-08 | 1.85E-07 | 1304.802 | 1848.61  | 1302.409 | 2566.946 | 2695.279 | 2520.489 |
| 18702 | LOC119625 | 14.47854 | 0.803656 | 0.654703 | 1.227511 | 0.219631 | 0.312206 | 11.38381 | 11.49565 | 8.348776 | 22.32127 | 19.252   | 14.06971 |
| 8649  | SKIDA1    | 131.6628 | 0.803512 | 0.249864 | 3.215793 | 0.001301 | 0.003998 | 91.07051 | 90.32295 | 105.0554 | 158.481  | 205.3546 | 139.6921 |
| 4303  | ETV1      | 880.5206 | 0.803413 | 0.155914 | 5.152929 | 2.56E-07 | 1.58E-06 | 574.0695 | 793.7471 | 555.1936 | 1122.76  | 1152.981 | 1084.373 |
| 3108  | MSRB2     | 705.0573 | 0.802653 | 0.127976 | 6.271888 | 3.57E-10 | 3.05E-09 | 516.0662 | 497.5973 | 530.1473 | 805.7978 | 939.0696 | 941.6658 |
| 3811  | GSDMD     | 2651.023 | 0.802565 | 0.145123 | 5.530229 | 3.20E-08 | 2.23E-07 | 2146.662 | 1522.9   | 2130.329 | 3323.637 | 3046.094 | 3736.514 |
| 23627 | TRNAC-GC  | 1.939754 | 0.802506 | 1.726071 | 0.464932 | 0.64198  | 0.722353 | 0.542086 | 2.189647 | 1.391463 | 2.232127 | 4.278221 | 1.004979 |
| 17389 | LOC103235 | 20.35719 | 0.802394 | 0.560828 | 1.43073  | 0.152508 | 0.23316  | 13.55216 | 13.13788 | 17.39328 | 29.01765 | 29.94755 | 19.09461 |
| 4767  | OPLAH     | 765.9093 | 0.802177 | 0.165981 | 4.832944 | 1.35E-06 | 7.50E-06 | 597.9213 | 455.4466 | 624.071  | 1042.403 | 804.3056 | 1071.308 |
| 18747 | ECSCR     | 17.91584 | 0.80215  | 0.654947 | 1.224755 | 0.220667 | 0.312922 | 13.55216 | 7.663765 | 17.39328 | 29.01765 | 27.80844 | 12.05975 |
| 3288  | PPP2R3A   | 3705.149 | 0.801965 | 0.132512 | 6.052003 | 1.43E-09 | 1.16E-08 | 2432.342 | 3289.398 | 2382.184 | 4604.878 | 4592.671 | 4929.424 |
| 6052  | PTGIS     | 209.187  | 0.801783 | 0.193509 | 4.143379 | 3.42E-05 | 0.00015  | 164.7943 | 142.3271 | 148.8865 | 274.5516 | 282.3626 | 242.2001 |
| 20499 | LOC103225 | 13.74652 | 0.801732 | 0.846618 | 0.946982 | 0.343    |          |          |          |          |          |          |          |



|       |           |          |          |          |          |          |          |          |          |          |          |          |          |
|-------|-----------|----------|----------|----------|----------|----------|----------|----------|----------|----------|----------|----------|----------|
| 19501 | LOC10324: | 11.71025 | 0.800935 | 0.727478 | 1.100975 | 0.270908 | 0.369299 | 7.047123 | 11.49565 | 6.957314 | 17.85702 | 12.83466 | 14.06971 |
| 1952  | YPEL5     | 2010.962 | 0.800176 | 0.09888  | 8.092427 | 5.85E-16 | 7.97E-15 | 1451.165 | 1415.06  | 1532.696 | 2584.803 | 2661.054 | 2420.996 |
| 17329 | DEF6      | 26.4266  | 0.800053 | 0.554094 | 1.443896 | 0.148768 | 0.22823  | 26.02015 | 13.6853  | 17.39328 | 29.01765 | 51.33866 | 21.10457 |
| 5313  | FZD5      | 610.4299 | 0.799815 | 0.177251 | 4.512336 | 6.41E-06 | 3.21E-05 | 385.4234 | 572.5928 | 377.7821 | 781.2444 | 763.6625 | 781.874  |
| 10919 | PAMR1     | 82.54398 | 0.799639 | 0.3021   | 2.646936 | 0.008122 | 0.019775 | 72.09749 | 52.55153 | 57.04997 | 89.28508 | 102.6773 | 121.6025 |
| 12096 | INHA      | 93.17891 | 0.799277 | 0.334761 | 2.387602 | 0.016959 | 0.037272 | 81.85504 | 43.24553 | 78.61764 | 149.5525 | 96.25998 | 109.5428 |
| 2982  | LOC11962: | 733.5492 | 0.799103 | 0.12391  | 6.449069 | 1.13E-10 | 1.00E-09 | 536.6655 | 560.5497 | 511.3626 | 895.0829 | 902.7047 | 994.9297 |
| 22043 | LOC10321: | 5.012428 | 0.798587 | 1.112206 | 0.71802  | 0.472745 | 0.570155 | 1.626259 | 3.831883 | 5.565851 | 4.464254 | 8.556443 | 6.029877 |
| 16989 | LOC10324: | 30.12134 | 0.798441 | 0.534305 | 1.494355 | 0.135083 | 0.211392 | 19.51511 | 19.15941 | 26.43779 | 33.4819  | 62.03421 | 20.09959 |
| 3362  | LRP10     | 3254.738 | 0.798323 | 0.133579 | 5.976424 | 2.28E-09 | 1.80E-08 | 2596.594 | 2000.79  | 2537.332 | 3957.561 | 3717.774 | 4718.379 |
| 9415  | LOC11962: | 119.468  | 0.797914 | 0.265613 | 3.00405  | 0.002664 | 0.007523 | 109.5014 | 78.8273  | 73.74753 | 154.0168 | 136.9031 | 163.8117 |
| 21124 | TRNAP-CG  | 7.562625 | 0.797751 | 0.926151 | 0.861361 | 0.389039 | 0.489591 | 4.878777 | 7.116354 | 4.174388 | 15.62489 | 8.556443 | 5.024897 |
| 10409 | RNF122    | 84.01474 | 0.797457 | 0.288523 | 2.763925 | 0.005711 | 0.014586 | 58.54533 | 55.28859 | 70.9646  | 111.6063 | 94.12087 | 113.5627 |
| 18028 | LOC11961: | 17.56592 | 0.79725  | 0.595718 | 1.3383   | 0.180799 | 0.2666   | 10.29964 | 15.87494 | 12.52316 | 22.32127 | 19.252   | 25.12449 |
| 17269 | TIE1      | 29.53229 | 0.797197 | 0.547565 | 1.455893 | 0.145422 | 0.223872 | 14.09425 | 18.612   | 31.30791 | 53.57105 | 38.50399 | 21.10457 |
| 3217  | ZFAT      | 733.9162 | 0.796691 | 0.129674 | 6.145475 | 7.97E-10 | 6.59E-09 | 509.5612 | 590.1099 | 510.6668 | 917.4042 | 889.87   | 985.8849 |
| 10320 | LOC10323: | 81.03332 | 0.796833 | 0.286283 | 2.783374 | 0.00538  | 0.013858 | 59.6295  | 65.14201 | 52.87558 | 98.21359 | 104.8164 | 105.5228 |
| 2482  | LOC10322: | 1723.714 | 0.796828 | 0.111397 | 7.153033 | 8.49E-13 | 9.09E-12 | 1241.92  | 1371.814 | 1166.742 | 2176.324 | 2059.964 | 2325.522 |
| 2424  | SLC44A2   | 4984.559 | 0.796725 | 0.11013  | 7.234405 | 4.68E-13 | 5.13E-12 | 3472.063 | 4014.718 | 3443.87  | 6252.188 | 5767.042 | 6957.473 |
| 2058  | PLAAT3    | 2889.025 | 0.79659  | 0.101158 | 7.874744 | 3.41E-15 | 4.41E-14 | 2096.248 | 2277.781 | 1961.267 | 3620.51  | 3525.254 | 3853.091 |
| 20001 | LOC11962: | 10.31871 | 0.796338 | 0.773472 | 1.029564 | 0.303215 | 0.403008 | 9.215468 | 4.926706 | 8.348776 | 13.39276 | 14.97377 | 11.05477 |
| 18066 | LOC11962: | 17.86066 | 0.796107 | 0.5983   | 1.330614 | 0.183316 | 0.269759 | 15.7205  | 13.6853  | 9.740239 | 26.78552 | 17.11289 | 24.11951 |
| 3391  | ZNF365    | 809.3336 | 0.796058 | 0.133747 | 5.951951 | 2.65E-09 | 2.08E-08 | 563.7698 | 670.0321 | 539.8875 | 1084.814 | 975.4345 | 1022.064 |
| 3510  | LOC10322: | 967.5416 | 0.795927 | 0.136107 | 5.847808 | 4.98E-09 | 3.77E-08 | 633.1569 | 824.4022 | 665.1192 | 1180.795 | 1221.432 | 1280.344 |
| 3348  | CTTNBP2   | 1650.736 | 0.795814 | 0.132725 | 5.995941 | 2.02E-09 | 1.61E-08 | 1103.688 | 1441.335 | 1074.905 | 2093.735 | 2047.129 | 2143.621 |
| 16635 | LOC11962: | 25.05019 | 0.795511 | 0.512614 | 1.551871 | 0.120693 | 0.192884 | 24.39389 | 15.32753 | 15.30609 | 29.01765 | 32.08666 | 34.1693  |
| 3614  | MGST3     | 5752.38  | 0.795443 | 0.13896  | 5.724277 | 1.04E-08 | 7.64E-08 | 4744.34  | 3223.708 | 4649.573 | 7263.341 | 7270.837 | 7362.48  |
| 2906  | AFF1      | 4891.658 | 0.795388 | 0.121641 | 6.538817 | 6.20E-11 | 5.67E-10 | 3181.505 | 4243.536 | 3304.724 | 6111.564 | 6102.883 | 6405.739 |
| 22239 | LOC11962: | 4.744704 | 0.795261 | 1.159809 | 0.685682 | 0.492913 | 0.589238 | 4.336691 | 4.379295 | 1.391463 | 8.928508 | 6.417332 | 3.014938 |
| 3240  | LATS1     | 2067.158 | 0.794955 | 0.129896 | 6.119941 | 9.36E-10 | 7.68E-09 | 1405.088 | 1799.89  | 1330.238 | 2573.642 | 2577.628 | 2716.46  |
| 22192 | SPI1      | 4.772393 | 0.794746 | 1.146537 | 0.693171 | 0.488203 | 0.584822 | 1.626259 | 2.737059 | 6.261582 | 6.696381 | 4.278221 | 7.034856 |
| 1783  | LOC10321: | 7358.269 | 0.794443 | 0.093447 | 8.501527 | 1.87E-17 | 2.79E-16 | 5173.13  | 5874.276 | 5096.928 | 9598.146 | 9170.367 | 9236.766 |
| 16856 | LOC11962: | 26.95213 | 0.794425 | 0.52468  | 1.514113 | 0.129997 | 0.205029 | 15.17842 | 29.01283 | 15.30609 | 26.78552 | 34.22577 | 41.20416 |
| 20229 | LOC10323: | 9.786099 | 0.794414 | 0.801675 | 0.990942 | 0.321714 | 0.422797 | 6.505036 | 7.663765 | 6.53045  | 13.9276  | 6.417332 | 17.08465 |
| 2413  | CYP1B1    | 2133.365 | 0.793458 | 0.109392 | 7.25332  | 4.07E-13 | 4.48E-12 | 1491.822 | 1718.873 | 1473.559 | 2790.159 | 2519.872 | 2805.903 |
| 3400  | PTPRM     | 7801.542 | 0.793434 | 0.133473 | 5.944524 | 2.77E-09 | 2.17E-08 | 5160.12  | 7051.759 | 4913.951 | 9908.412 | 9688.032 | 10086.98 |
| 22039 | LOC11962: | 5.00657  | 0.793337 | 1.104013 | 0.718594 | 0.472391 | 0.569832 | 3.252518 | 2.737059 | 4.87012  | 4.464254 | 10.69555 | 4.019918 |
| 22896 | LOC11962: | 3.609356 | 0.793244 | 1.36806  | 0.579831 | 0.562029 | 0.65257  | 0.542086 | 3.831883 | 3.478657 | 2.232127 | 8.556443 | 3.014938 |
| 2533  | BNIP3L    | 2970.225 | 0.792469 | 0.111983 | 7.076721 | 1.48E-12 | 1.55E-11 | 1955.848 | 2475.944 | 2090.673 | 3774.527 | 3779.809 | 3744.554 |
| 2421  | KIAA1549  | 4338.145 | 0.791511 | 0.109294 | 7.242034 | 4.42E-13 | 4.85E-12 | 3011.29  | 3570.22  | 2952.684 | 5209.784 | 5392.698 | 5892.195 |
| 1918  | EFR3A     | 13225.71 | 0.791343 | 0.097064 | 8.152804 | 3.56E-16 | 4.93E-15 | 9167.223 | 10770.87 | 9123.125 | 16676.22 | 16366.34 | 17250.47 |
| 19391 | LOC10323: | 13.11881 | 0.790816 | 0.706641 | 1.11912  | 0.263089 | 0.360694 | 6.505036 | 13.6853  | 8.348776 | 17.85702 | 19.252   | 13.06473 |
| 1917  | PARP3     | 3379.231 | 0.790752 | 0.096868 | 8.163178 | 3.26E-16 | 4.53E-15 | 2482.756 | 2554.224 | 2394.707 | 4153.988 | 4055.754 | 4633.96  |
| 22316 | LOC10322: | 4.18465  | 0.790583 | 1.175858 | 0.672346 | 0.501364 | 0.597273 | 2.168345 | 4.379295 | 2.782925 | 4.464254 | 4.278221 | 7.034856 |
| 23508 | LOC10321: | 2.790641 | 0.790197 | 1.638745 | 0.482196 | 0.629666 | 0.712078 | 2.168345 | 0        | 4.174388 | 2.232127 | 2.139111 | 6.029877 |
| 2607  | KAZN      | 1142.405 | 0.790146 | 0.113357 | 6.970395 | 3.16E-12 | 3.22E-11 | 801.2037 | 902.6821 | 809.1356 | 1455.347 | 1377.587 | 1508.474 |
| 1838  | ARMCX3    | 2391.988 | 0.790132 | 0.094727 | 8.341128 | 7.36E-17 | 1.06E-15 | 1791.053 | 1811.386 | 1657.232 | 3011.139 | 2962.668 | 3118.451 |
| 1877  | PRUNE2    | 9924.643 | 0.790117 | 0.095933 | 8.23611  | 1.78E-16 | 2.52E-15 | 7400.021 | 7693.326 | 6729.114 | 12020    | 12201.49 | 13503.91 |
| 4916  | LOC10324: | 272.7764 | 0.789988 | 0.166795 | 4.736268 | 2.18E-06 | 1.18E-05 | 197.8615 | 206.3743 | 196.1962 | 343.7476 | 333.7013 | 358.7777 |
| 6658  | LOC10323: | 243.988  | 0.78992  | 0.203927 | 3.873537 | 0.000107 | 0.000428 | 158.8313 | 217.3225 | 160.0182 | 281.248  | 337.9795 | 308.5287 |
| 6038  | SLC22A12  | 237.3395 | 0.789758 | 0.190395 | 4.147994 | 3.35E-05 | 0.000148 | 155.0367 | 195.426  | 172.5414 | 274.5516 | 305.8928 | 320.5885 |
| 17466 | DISP3     | 20.90849 | 0.789565 | 0.557462 | 1.416356 | 0.156671 | 0.238469 | 14.63633 | 12.59047 | 18.78475 | 20.08914 | 34.22577 | 25.12449 |
| 21020 | LOC10321: | 9.50621  | 0.789457 | 0.899887 | 0.877284 | 0.380332 | 0.481024 | 7.589209 | 3.831883 | 9.044508 | 11.16063 | 21.39111 | 4.019918 |
| 15877 | ZNF837    | 48.59651 | 0.789428 | 0.467628 | 1.688155 | 0.091382 | 0.153009 | 36.86187 | 20.25424 | 50.09266 | 84.82083 | 34.22577 | 65.32367 |
| 2215  | PI4K2A    | 2276.559 | 0.789412 | 0.104195 | 7.57629  | 3.56E-14 | 4.27E-13 | 1678.41  | 1700.261 | 1631.49  | 2903.997 | 2618.271 | 3126.491 |
| 15812 | ANKRD2    | 30.47138 | 0.789307 | 0.464584 | 1.698953 | 0.089328 | 0.150189 | 22.76763 | 18.06459 | 25.74206 | 40.17829 | 44.92132 | 31.15436 |
| 10518 | LOC11962: | 90.09026 | 0.789201 | 0.288039 | 2.739913 | 0.006146 | 0.015533 | 58.54533 | 62.95236 | 77.22618 | 93.74933 | 130.4858 | 117.5826 |
| 14775 | LOC10322: | 42.65063 | 0.788949 | 0.420226 | 1.877443 | 0.060457 | 0.108775 | 28.73058 | 33.93953 | 29.91645 | 73.66019 | 53.47777 | 36.17926 |
| 16744 | ANKRD55   | 33.83503 | 0.788924 | 0.514243 | 1.534146 | 0.124994 | 0.198457 | 22.22554 | 24.08612 | 27.82925 | 71.42806 | 19.252   | 38.18922 |
| 10020 | LOC11962: | 204.8877 | 0.788907 | 0.276183 | 2.856463 | 0.004284 | 0.011366 | 171.8414 | 123.1677 | 153.0609 | 247.7661 | 363.6488 | 169.8415 |
| 8166  | LOC11962: | 194.5847 | 0.788892 | 0.23484  | 3.359281 | 0.000781 | 0.002544 | 158.8313 | 111.1246 | 159.3225 | 270.0874 | 196.7982 | 271.3445 |
| 1895  | MINK1     | 2844.246 | 0.788888 | 0.096128 | 8.206622 | 2.27E-16 | 3.19E-15 | 1984.036 | 2218.113 | 2056.582 | 3578.1   | 3476.055 | 3752.593 |
| 6077  | RPS6KL1   | 341.1691 | 0.788108 | 0.190667 | 4.133433 | 3.57E-05 | 0.000156 | 280.2587 | 191.5941 | 278.9883 | 448.6575 | 421.4048 | 426.1113 |
| 2523  | TPRG1L    | 1458.478 | 0.787993 | 0.111114 | 7.091738 | 1.32E-12 | 1.40E-11 | 1121.577 | 995.7421 | 1095.777 | 1814.719 | 1741.236 | 1981.82  |
| 3043  | KCNIP2    | 715.3606 | 0.787958 | 0.124105 | 6.349122 | 2.17E-10 | 1.89E-09 | 549.1335 | 511.2826 | 514.1455 | 843.744  | 958.3216 | 915.5363 |
| 2568  | PCDH1     | 999.1977 | 0.787918 | 0.112173 | 7.024111 | 2.15E-12 | 2.23E-11 | 745.9108 | 758.7128 | 695.7314 | 1243.295 | 1229.989 | 1321.548 |
| 3955  | IGDCC3    | 1334.758 | 0.787761 | 0.145711 | 5.406311 | 6.43E-08 | 4.32E-07 | 1089.052 | 799.7687 | 1051.946 | 1683.024 | 1514.49  | 1870.267 |
| 17507 | NOX1      | 20.34625 | 0.787373 | 0.557113 | 1.413311 | 0.157564 | 0.23947  | 14.63633 | 15.87494 | 13.91463 | 22.32127 | 34.22577 | 21.10457 |
| 17907 | LOC11962: | 20.64401 | 0.78723  | 0.578711 | 1.360315 | 0.17373  | 0.257923 | 16.26259 | 18.06459 | 10.43597 | 26.78552 | 34.22577 | 18.08963 |
| 23528 | TRPC4     | 2.782833 | 0.78718  | 1.644419 | 0.478698 | 0.632153 | 0.714289 | 1        |          |          |          |          |          |



|       |           |          |          |          |          |          |          |          |          |          |          |          |          |
|-------|-----------|----------|----------|----------|----------|----------|----------|----------|----------|----------|----------|----------|----------|
| 20425 | MAP3K19   | 9.453312 | 0.786523 | 0.821075 | 0.957919 | 0.338104 | 0.440073 | 7.047123 | 6.02153  | 7.653045 | 6.696381 | 19.252   | 10.04979 |
| 2994  | PIP5K1C   | 971.4164 | 0.786505 | 0.122333 | 6.429208 | 1.28E-10 | 1.14E-09 | 658.0929 | 745.5749 | 738.8667 | 1209.813 | 1146.563 | 1329.588 |
| 18553 | KCNE5     | 21.74281 | 0.78571  | 0.632212 | 1.242794 | 0.213944 | 0.306564 | 13.55216 | 13.6853  | 20.17621 | 15.62489 | 51.33866 | 16.07967 |
| 24610 | LOC103232 | 1.10181  | 0.78557  | 2.494197 | 0.314959 | 0.752793 | 0.813206 | 0.542086 | 1.094824 | 0.695731 | 0        | 4.278221 | 0        |
| 5623  | LOC103222 | 1048.178 | 0.785251 | 0.180008 | 4.362325 | 1.29E-05 | 6.08E-05 | 659.7191 | 1026.945 | 622.6796 | 1343.74  | 1247.102 | 1388.882 |
| 2157  | BTG1      | 3201.129 | 0.785248 | 0.102348 | 7.672329 | 1.69E-14 | 2.08E-13 | 2495.766 | 2184.721 | 2376.618 | 3839.258 | 3948.798 | 4361.611 |
| 7147  | BFXL6     | 889.9441 | 0.784485 | 0.213094 | 3.681399 | 0.000232 | 0.000863 | 809.3349 | 417.6752 | 736.7795 | 1078.117 | 988.2691 | 1309.488 |
| 24290 | TRNAF-GA  | 1.68191  | 0.783962 | 2.156585 | 0.36352  | 0.716216 | 0.783887 | 0        | 2.189647 | 1.391463 | 2.232127 | 4.278221 | 0        |
| 22344 | LOC103245 | 4.177905 | 0.783484 | 1.17272  | 0.668092 | 0.504075 | 0.599751 | 4.336691 | 2.737059 | 2.087194 | 4.464254 | 6.417332 | 5.024897 |
| 2618  | LOC103237 | 1812.662 | 0.783406 | 0.112606 | 6.95704  | 3.47E-12 | 3.53E-11 | 1327.57  | 1442.43  | 1230.053 | 2189.717 | 2196.867 | 2489.334 |
| 13816 | LOC103236 | 59.69068 | 0.782565 | 0.382651 | 2.045117 | 0.040843 | 0.078591 | 52.58238 | 47.62483 | 29.91645 | 87.05295 | 87.70354 | 53.26391 |
| 17444 | LOC119624 | 28.74984 | 0.782347 | 0.551245 | 1.419237 | 0.15583  | 0.237488 | 17.88885 | 18.06459 | 26.43779 | 49.10679 | 44.92132 | 16.07967 |
| 2600  | MGST1     | 10526.72 | 0.782334 | 0.11206  | 6.981388 | 2.92E-12 | 2.99E-11 | 6909.433 | 8997.261 | 7313.528 | 13301.24 | 13529.87 | 13108.95 |
| 3542  | FKBP5     | 3304.928 | 0.781899 | 0.134544 | 5.811459 | 6.19E-09 | 4.65E-08 | 2139.615 | 2969.162 | 2183.901 | 4160.685 | 4006.554 | 4369.651 |
| 4227  | ASTE1     | 379.9677 | 0.781723 | 0.150352 | 5.199296 | 2.00E-07 | 1.26E-06 | 293.8108 | 279.18   | 264.3779 | 508.925  | 464.187  | 469.3254 |
| 15822 | LOC103230 | 31.80258 | 0.781243 | 0.460722 | 1.695692 | 0.089944 | 0.151129 | 20.59928 | 25.18094 | 24.3506  | 29.01765 | 53.47777 | 38.18922 |
| 3264  | PCM1      | 10792.86 | 0.781071 | 0.128453 | 6.080588 | 1.20E-09 | 9.75E-09 | 7120.304 | 9679.883 | 7022.017 | 13095.89 | 13718.12 | 14120.97 |
| 4893  | ALDH4A1   | 1466.501 | 0.780663 | 0.16451  | 4.745392 | 2.08E-06 | 1.13E-05 | 1221.863 | 856.6995 | 1163.263 | 1796.862 | 1559.412 | 2200.905 |
| 14330 | SEPTIN3   | 48.64279 | 0.780502 | 0.398996 | 1.956165 | 0.050446 | 0.093587 | 32.52518 | 39.41365 | 34.09084 | 82.5887  | 62.03421 | 41.20416 |
| 16686 | LOC119618 | 23.81468 | 0.780316 | 0.505183 | 1.544619 | 0.122438 | 0.19506  | 17.34676 | 18.06459 | 17.39328 | 31.24978 | 25.66933 | 33.16432 |
| 7216  | ACER2     | 196.3493 | 0.779838 | 0.212983 | 3.661494 | 0.000251 | 0.000924 | 140.9425 | 165.3184 | 125.9274 | 232.1412 | 286.6408 | 227.1254 |
| 21749 | LOC119620 | 5.909089 | 0.779574 | 1.014079 | 0.768751 | 0.442041 | 0.540332 | 2.710432 | 4.926706 | 5.565851 | 8.928508 | 4.278221 | 9.044815 |
| 18102 | LOC119627 | 19.33589 | 0.779543 | 0.590447 | 1.320258 | 0.186749 | 0.274264 | 15.7205  | 9.306001 | 17.39328 | 24.5534  | 29.94755 | 19.09461 |
| 14723 | TRNAY-GU  | 52.51072 | 0.779508 | 0.413576 | 1.884802 | 0.059457 | 0.107359 | 33.60935 | 40.50847 | 40.35242 | 71.42806 | 91.98176 | 37.18424 |
| 16675 | LOC119625 | 24.68647 | 0.779222 | 0.504158 | 1.545592 | 0.122203 | 0.19483  | 20.0572  | 14.78012 | 19.48048 | 35.71403 | 29.94755 | 28.13943 |
| 12887 | TRNAH-GL  | 74.28238 | 0.779049 | 0.35072  | 2.221287 | 0.026332 | 0.05432  | 64.50828 | 35.03436 | 64.00729 | 91.51721 | 111.2338 | 79.39338 |
| 3220  | MOSPD1    | 624.4098 | 0.778909 | 0.126866 | 6.139615 | 8.27E-10 | 6.83E-09 | 474.3256 | 458.1837 | 444.5723 | 823.6549 | 800.0274 | 745.6948 |
| 18326 | LOC119627 | 16.77113 | 0.778614 | 0.608784 | 1.278966 | 0.200909 | 0.291453 | 10.29964 | 13.13788 | 13.91463 | 15.62489 | 23.53022 | 24.11951 |
| 3920  | SPTBN4    | 492.6648 | 0.778292 | 0.143329 | 5.430106 | 5.63E-08 | 3.82E-07 | 381.6288 | 362.3866 | 345.0828 | 667.406  | 558.3079 | 641.1769 |
| 15224 | LOC119620 | 46.01967 | 0.778273 | 0.434377 | 1.791699 | 0.073181 | 0.127793 | 23.30971 | 44.34036 | 34.09084 | 37.94616 | 79.14709 | 57.28383 |
| 5494  | ERICH1    | 394.7924 | 0.778134 | 0.176375 | 4.411812 | 1.03E-05 | 4.96E-05 | 255.3227 | 347.6065 | 269.9438 | 446.4254 | 536.9168 | 512.5395 |
| 2053  | SUSD4     | 1599.521 | 0.777984 | 0.098751 | 7.878261 | 3.32E-15 | 4.30E-14 | 1161.149 | 1190.073 | 1186.918 | 1944.183 | 2004.347 | 2110.457 |
| 6307  | SIGIRR    | 545.556  | 0.777764 | 0.193373 | 4.022098 | 5.77E-05 | 0.000243 | 444.5108 | 312.0247 | 452.9211 | 676.3345 | 560.447  | 827.0981 |
| 17032 | LOC119624 | 44.9928  | 0.777737 | 0.522437 | 1.488673 | 0.136573 | 0.213176 | 44.99317 | 10.94824 | 43.13534 | 60.26743 | 66.31243 | 44.2191  |
| 18173 | LOC103237 | 17.59557 | 0.777449 | 0.594558 | 1.307607 | 0.191007 | 0.279421 | 11.9259  | 15.87494 | 11.1317  | 17.85702 | 25.66933 | 23.11453 |
| 4937  | FOXO4     | 294.6578 | 0.777389 | 0.164598 | 4.722962 | 2.32E-06 | 1.25E-05 | 215.7504 | 204.732  | 230.2871 | 383.9258 | 376.4835 | 356.7677 |
| 21742 | TMEM236   | 6.451334 | 0.777131 | 1.008334 | 0.770709 | 0.44088  | 0.539106 | 4.336691 | 6.02153  | 3.478657 | 11.16063 | 10.69555 | 3.014938 |
| 19551 | LOC103238 | 12.10631 | 0.776711 | 0.71214  | 1.090673 | 0.275417 | 0.374506 | 8.131296 | 8.211177 | 10.43597 | 20.08914 | 10.69555 | 15.07469 |
| 12959 | LOC119627 | 64.14017 | 0.776623 | 0.351123 | 2.211826 | 0.026979 | 0.055346 | 46.61943 | 37.224   | 57.04997 | 98.23139 | 83.42532 | 62.30873 |
| 23177 | LOC119627 | 4.470941 | 0.776264 | 1.454827 | 0.533578 | 0.593633 | 0.680936 | 4.878777 | 0        | 4.87012  | 2.232127 | 12.83466 | 2.009959 |
| 2322  | TSC22D4   | 1787.422 | 0.776239 | 0.105169 | 7.38086  | 1.57E-13 | 1.80E-12 | 1309.139 | 1245.362 | 1402.594 | 2263.377 | 2126.276 | 2377.781 |
| 3083  | PTPRJ     | 4101.725 | 0.775989 | 0.123251 | 6.295988 | 3.05E-10 | 2.63E-09 | 2886.61  | 3510.005 | 2679.262 | 5109.339 | 4785.191 | 5639.945 |
| 2384  | UTP4      | 2227.238 | 0.775689 | 0.106343 | 7.294233 | 3.00E-13 | 3.35E-12 | 1595.36  | 1780.183 | 1554.96  | 2774.534 | 2652.497 | 3005.894 |
| 21745 | TRNAC-AC  | 6.39802  | 0.775666 | 1.006716 | 0.770492 | 0.441008 | 0.539168 | 4.878777 | 3.831883 | 5.565851 | 2.232127 | 12.83466 | 9.044815 |
| 15367 | CCNA1     | 33.14329 | 0.775345 | 0.438973 | 1.76627  | 0.077351 | 0.133817 | 24.93597 | 22.9913  | 25.74206 | 46.87467 | 32.08666 | 46.22906 |
| 22848 | LOC119625 | 3.364351 | 0.775325 | 1.324278 | 0.58547  | 0.558232 | 0.649536 | 1.626259 | 2.189647 | 3.478657 | 4.464254 | 6.417332 | 2.009959 |
| 3957  | APOBEC3H  | 533.1729 | 0.774893 | 0.143347 | 5.405707 | 6.46E-08 | 4.34E-07 | 373.4975 | 440.6665 | 366.6504 | 671.8702 | 643.8723 | 702.4806 |
| 2304  | LOC103237 | 3699.915 | 0.774738 | 0.104574 | 7.408523 | 1.28E-13 | 1.47E-12 | 2615.567 | 3021.166 | 2551.943 | 4886.126 | 4402.29  | 4722.399 |
| 24767 | LOC119628 | 1.156648 | 0.77473  | 2.696389 | 0.287321 | 0.773866 | 0.830671 | 1.084173 | 0        | 1.391463 | 4.464254 | 0        | 0        |
| 21507 | PYHIN1    | 6.725141 | 0.77466  | 0.965191 | 0.802598 | 0.422207 | 0.521894 | 2.710432 | 7.116354 | 4.87012  | 8.928508 | 10.69555 | 6.029877 |
| 24010 | LOC103225 | 1.668714 | 0.774613 | 1.911963 | 0.40514  | 0.685375 | 0.758879 | 0.542086 | 1.094824 | 2.087194 | 0        | 4.278221 | 2.009959 |
| 5795  | ARL11     | 354.9157 | 0.774371 | 0.181054 | 4.277009 | 1.89E-05 | 8.69E-05 | 284.0533 | 214.038  | 289.4243 | 399.5507 | 462.0479 | 480.3802 |
| 21718 | TRNAN-GL  | 9.091843 | 0.774301 | 0.998429 | 0.775519 | 0.438033 | 0.536181 | 1.626259 | 12.59047 | 5.565851 | 22.32127 | 6.417332 | 6.029877 |
| 5923  | LOC103227 | 375.1972 | 0.773638 | 0.184194 | 4.200122 | 2.67E-05 | 0.00012  | 324.7097 | 225.5337 | 281.7712 | 495.5322 | 417.1266 | 506.5097 |
| 21061 | LOC103214 | 8.727113 | 0.773346 | 0.887793 | 0.871089 | 0.383706 | 0.484346 | 3.252518 | 6.02153  | 10.43597 | 11.16063 | 6.417332 | 15.07469 |
| 4360  | MRPL15    | 2984.071 | 0.773298 | 0.15144  | 5.106318 | 3.28E-07 | 2.00E-06 | 2540.759 | 1637.309 | 2432.277 | 3698.634 | 3692.105 | 3903.34  |
| 4451  | UBTD1     | 399.0813 | 0.773076 | 0.153331 | 5.041868 | 4.61E-07 | 2.75E-06 | 311.6997 | 274.8007 | 299.1645 | 513.3892 | 457.7697 | 537.664  |
| 16004 | TAF1L     | 34.84444 | 0.772914 | 0.464491 | 1.664003 | 0.096112 | 0.159646 | 20.0572  | 29.01283 | 27.13352 | 49.10679 | 55.61688 | 28.13943 |
| 21885 | LOC103224 | 6.191359 | 0.772853 | 1.035135 | 0.746621 | 0.455293 | 0.553045 | 7.047123 | 2.189647 | 4.174388 | 11.16063 | 8.556443 | 4.019918 |
| 22216 | LOC119628 | 5.075595 | 0.77285  | 1.120693 | 0.689618 | 0.490434 | 0.586864 | 2.710432 | 1.642235 | 6.957314 | 6.696381 | 6.417332 | 6.029877 |
| 12443 | ZNF563    | 59.91234 | 0.772218 | 0.334013 | 2.311937 | 0.020781 | 0.044402 | 47.16151 | 40.50847 | 45.22254 | 62.49956 | 87.70354 | 76.37844 |
| 19358 | LOC119624 | 16.1809  | 0.771781 | 0.685576 | 1.125741 | 0.260275 | 0.357445 | 16.80468 | 7.116354 | 11.82743 | 11.16063 | 32.08666 | 18.08963 |
| 2116  | LIMK1     | 4477.457 | 0.771558 | 0.099306 | 7.769469 | 7.88E-15 | 9.90E-14 | 3157.111 | 3593.759 | 3176.014 | 5600.407 | 5347.777 | 5989.678 |
| 15235 | LOC119624 | 3566.317 | 0.771333 | 0.431012 | 1.789587 | 0.07352  | 0.128293 | 1612.165 | 4180.584 | 2112.24  | 4624.967 | 4344.534 | 4523.413 |
| 2962  | IGSF9B    | 898.7619 | 0.770987 | 0.119064 | 6.475424 | 9.45E-11 | 8.49E-10 | 642.3723 | 703.4242 | 649.1174 | 1131.688 | 1060.999 | 1204.97  |
| 12024 | CELF6     | 74.79178 | 0.770971 | 0.320935 | 2.402268 | 0.016294 | 0.036025 | 65.59245 | 45.43518 | 53.57132 | 109.3742 | 98.39909 | 76.37844 |
| 16998 | RLF152    | 51.52278 | 0.770725 | 0.516412 | 1.492461 | 0.135578 | 0.212045 | 27.6464  | 34.48694 | 50.78839 | 71.42806 | 102.6773 | 22.10955 |
| 20800 | LOC119625 | 14.33692 | 0.77066  | 0.852126 | 0.904397 | 0.365785 | 0.467519 | 13.01007 | 7.663765 | 10.43597 | 13.39276 | 38.50399 | 3.014938 |
| 4544  | CADM4     | 630.4245 | 0.77026  | 0.154652 | 4.980594 | 6.34E-07 | 3.71E-06 | 501.4299 | 405.6322 | 494.665  | 687.4951 | 797.8883 | 895.4367 |
| 23377 | LOC119615 | 2.529602 | 0.770217 | 1.53331  | 0.502323 | 0.61544  | 0.699874 |          |          |          |          |          |          |



|       |           |          |          |          |          |          |          |          |          |          |          |          |          |
|-------|-----------|----------|----------|----------|----------|----------|----------|----------|----------|----------|----------|----------|----------|
| 15194 | SPTA1     | 40.17624 | 0.768683 | 0.427761 | 1.796991 | 0.072337 | 0.126569 | 30.89892 | 24.63353 | 32.69937 | 51.33892 | 66.31243 | 35.17428 |
| 3093  | LZTS2     | 2470.519 | 0.768642 | 0.122249 | 6.287512 | 3.23E-10 | 2.77E-09 | 1932.538 | 1630.74  | 1925.089 | 2964.265 | 2845.017 | 3525.468 |
| 9598  | LOC119627 | 109.4661 | 0.768617 | 0.259538 | 2.961486 | 0.003062 | 0.00848  | 81.31296 | 71.16354 | 91.83654 | 127.2312 | 130.4858 | 154.7668 |
| 4766  | BTG2      | 540.5237 | 0.768607 | 0.159005 | 4.833846 | 1.34E-06 | 7.47E-06 | 355.0666 | 477.8905 | 365.9547 | 660.7096 | 710.1847 | 673.3362 |
| 6608  | ZNF586    | 206.6337 | 0.768309 | 0.197026 | 3.899532 | 9.64E-05 | 0.000388 | 167.5047 | 146.159  | 143.3207 | 287.9444 | 256.6933 | 238.1801 |
| 22107 | FBLN2     | 5.864594 | 0.767733 | 1.085137 | 0.707498 | 0.479257 | 0.576335 | 7.047123 | 1.642235 | 4.174388 | 4.464254 | 12.83466 | 5.024897 |
| 15583 | HAL       | 39.1311  | 0.767419 | 0.443074 | 1.732033 | 0.083268 | 0.142048 | 28.73058 | 29.01283 | 27.82925 | 58.0353  | 62.03421 | 29.1444  |
| 16288 | LOC119627 | 29.22095 | 0.767359 | 0.476963 | 1.608843 | 0.107651 | 0.175706 | 16.80468 | 22.9913  | 25.74206 | 33.4819  | 32.08666 | 44.2191  |
| 18993 | LOC119627 | 17.28588 | 0.767263 | 0.646798 | 1.186247 | 0.235525 | 0.329655 | 11.9259  | 17.51718 | 9.044508 | 11.16063 | 29.94755 | 24.11951 |
| 18839 | PTTG1IP2  | 17.25507 | 0.766969 | 0.632557 | 1.212489 | 0.225325 | 0.317972 | 11.38381 | 9.306001 | 17.39328 | 31.24978 | 17.11289 | 17.08465 |
| 9195  | LOC103225 | 111.1048 | 0.766842 | 0.25095  | 3.055757 | 0.002245 | 0.006491 | 75.89209 | 88.68071 | 81.40057 | 156.2489 | 134.764  | 129.6424 |
| 2377  | TXNDC11   | 1331.54  | 0.766579 | 0.104945 | 7.30461  | 2.78E-13 | 3.11E-12 | 986.5972 | 1008.333 | 965.6751 | 1651.774 | 1600.055 | 1776.804 |
| 6700  | CRPPA     | 219.1757 | 0.766378 | 0.198787 | 3.855263 | 0.000116 | 0.000459 | 166.4205 | 149.4434 | 170.4542 | 243.3018 | 325.1448 | 260.2897 |
| 2650  | UNC93B1   | 5020.85  | 0.766626 | 0.111146 | 6.894155 | 5.42E-12 | 5.44E-11 | 3806.53  | 3577.336 | 3775.038 | 6535.668 | 5441.898 | 6988.627 |
| 16468 | CATSPERE  | 34.61439 | 0.765474 | 0.484971 | 1.578391 | 0.114476 | 0.184803 | 35.7777  | 18.612   | 21.56767 | 49.10679 | 53.47777 | 29.1444  |
| 18337 | LOC103215 | 19.89884 | 0.765466 | 0.59935  | 1.27716  | 0.201546 | 0.29219  | 20.0572  | 9.306001 | 14.61036 | 20.08914 | 34.22577 | 21.10457 |
| 22920 | LOC119615 | 3.343511 | 0.765403 | 1.327901 | 0.576401 | 0.564344 | 0.654585 | 2.168345 | 3.831883 | 1.391463 | 2.232127 | 6.417332 | 4.019918 |
| 8856  | LOC103235 | 133.4131 | 0.764602 | 0.2423   | 3.155597 | 0.001602 | 0.004808 | 114.3802 | 83.75401 | 98.09812 | 158.481  | 183.9635 | 161.8017 |
| 4692  | LAMA5     | 2966.443 | 0.764562 | 0.15639  | 4.888817 | 1.01E-06 | 5.75E-06 | 2328.261 | 1712.852 | 2557.509 | 3866.044 | 3140.214 | 4193.779 |
| 19720 | IGFBPL1   | 12.32047 | 0.764551 | 0.717269 | 1.065919 | 0.28646  | 0.386184 | 8.673382 | 8.758589 | 9.740239 | 11.16063 | 23.53022 | 12.05975 |
| 18933 | LOC119627 | 15.40986 | 0.764267 | 0.637823 | 1.198244 | 0.230822 | 0.324111 | 11.9259  | 9.853413 | 12.52316 | 13.39276 | 25.66933 | 19.09461 |
| 18847 | BMP4      | 29.03423 | 0.763824 | 0.630028 | 1.212365 | 0.225373 | 0.317985 | 10.29964 | 14.78012 | 38.96096 | 53.57105 | 38.50399 | 18.08963 |
| 16231 | LOC103224 | 33.67139 | 0.763187 | 0.47072  | 1.621317 | 0.10495  | 0.171899 | 25.47806 | 31.20247 | 17.39328 | 40.17829 | 55.61688 | 32.15934 |
| 3520  | RTKN      | 735.8543 | 0.762677 | 0.130612 | 5.839248 | 5.24E-09 | 3.96E-08 | 569.7328 | 503.0715 | 567.7168 | 910.7078 | 859.9225 | 1003.974 |
| 18044 | LOC119620 | 21.0712  | 0.762394 | 0.570869 | 1.335497 | 0.181714 | 0.267727 | 21.14137 | 14.78012 | 10.43597 | 29.01765 | 29.94755 | 21.10457 |
| 4171  | NFE2L3    | 1240.652 | 0.762243 | 0.14533  | 5.2449   | 1.56E-07 | 9.97E-07 | 810.9612 | 1128.216 | 821.6587 | 1537.935 | 1557.273 | 1587.868 |
| 4533  | LOC119618 | 516.7496 | 0.762125 | 0.152632 | 4.993234 | 5.94E-07 | 3.48E-06 | 358.3191 | 373.8823 | 414.6559 | 698.6557 | 695.211  | 559.7736 |
| 2245  | BAHD1     | 1475.466 | 0.761964 | 0.101328 | 7.519805 | 5.49E-14 | 6.50E-13 | 1090.678 | 1106.319 | 1090.211 | 1808.023 | 1796.853 | 1960.715 |
| 4789  | MKNK1     | 334.3731 | 0.761891 | 0.158078 | 4.819722 | 1.44E-06 | 7.98E-06 | 262.9119 | 241.4086 | 240.0273 | 392.8543 | 444.935  | 424.1013 |
| 21366 | SNAI3     | 7.808228 | 0.761795 | 0.927167 | 0.821638 | 0.411283 | 0.511715 | 8.131296 | 4.926706 | 4.174388 | 4.464254 | 17.11289 | 8.039836 |
| 10931 | LOC119615 | 189.754  | 0.761401 | 0.287936 | 2.644339 | 0.008185 | 0.019907 | 154.4946 | 94.15483 | 171.8456 | 261.1589 | 293.0582 | 163.8117 |
| 22873 | LOC103244 | 3.387816 | 0.76105  | 1.306098 | 0.582689 | 0.560102 | 0.650971 | 1.626259 | 3.284471 | 2.782925 | 4.464254 | 2.139111 | 6.029877 |
| 1713  | LEPROT    | 6759.514 | 0.761047 | 0.087555 | 8.692222 | 3.55E-18 | 5.52E-17 | 5202.945 | 4811.75  | 5039.878 | 8120.478 | 8470.878 | 8911.153 |
| 1734  | MCL1      | 15938.19 | 0.760898 | 0.088184 | 8.628568 | 6.21E-18 | 9.52E-17 | 11896.63 | 12236.3  | 11361.99 | 19336.92 | 19294.78 | 21502.54 |
| 2727  | RAB11FIP1 | 1996.411 | 0.760251 | 0.111672 | 6.807875 | 9.91E-12 | 9.66E-11 | 1448.455 | 1573.262 | 1429.728 | 2274.537 | 2487.786 | 2764.699 |
| 12548 | LOC119624 | 74.31535 | 0.760217 | 0.331475 | 2.29344  | 0.021823 | 0.046235 | 56.91907 | 61.31012 | 46.614   | 71.42806 | 126.2075 | 83.4133  |
| 18986 | KRT39     | 16.30436 | 0.759873 | 0.640152 | 1.187019 | 0.23522  | 0.329351 | 10.29964 | 9.306001 | 16.69755 | 15.62489 | 27.80844 | 18.08963 |
| 2034  | RAB11A    | 4800.902 | 0.759837 | 0.096175 | 7.900555 | 2.78E-15 | 3.63E-14 | 3783.763 | 3237.393 | 3675.549 | 6028.975 | 5940.31  | 6139.42  |
| 13356 | TMEM269   | 58.75007 | 0.75965  | 0.355715 | 2.135556 | 0.032716 | 0.065115 | 53.66655 | 36.12918 | 40.35242 | 69.19594 | 89.84265 | 63.31371 |
| 22152 | LOC103217 | 5.365486 | 0.759468 | 1.086407 | 0.699063 | 0.484512 | 0.581472 | 1.626259 | 6.02153  | 4.174388 | 8.928508 | 6.417332 | 5.024897 |
| 7614  | LOC103227 | 157.4938 | 0.759069 | 0.215568 | 3.521257 | 0.00043  | 0.0015   | 108.9594 | 116.5987 | 125.9274 | 178.5702 | 213.9111 | 200.9959 |
| 9589  | CD99L2    | 546.1984 | 0.758828 | 0.256022 | 2.96392  | 0.003037 | 0.008421 | 297.0633 | 625.1443 | 293.5986 | 665.1738 | 787.1927 | 609.0176 |
| 3242  | RNF170    | 1010.156 | 0.758569 | 0.124055 | 6.114797 | 9.67E-10 | 7.93E-09 | 821.2608 | 666.7476 | 763.913  | 1225.438 | 1311.275 | 1272.304 |
| 4174  | PRRG1     | 986.307  | 0.758211 | 0.144583 | 5.244123 | 1.57E-07 | 1.00E-06 | 680.8605 | 879.1434 | 639.3771 | 1194.188 | 1227.85  | 1296.424 |
| 17673 | SH2D6     | 21.91837 | 0.758194 | 0.545476 | 1.389968 | 0.164539 | 0.247511 | 13.55216 | 15.32753 | 20.17621 | 20.08914 | 34.22577 | 28.13943 |
| 20276 | NKX6-1    | 12.97209 | 0.7581   | 0.770832 | 0.983483 | 0.32537  | 0.42661  | 4.878777 | 10.40082 | 13.2189  | 15.62489 | 25.66933 | 8.039836 |
| 6245  | IQCG      | 290.3155 | 0.757143 | 0.186795 | 4.053328 | 5.05E-05 | 0.000215 | 208.7033 | 247.9776 | 190.6304 | 319.1942 | 408.5701 | 366.8175 |
| 2052  | SAR1B     | 3266.794 | 0.756979 | 0.096075 | 7.879023 | 3.30E-15 | 4.27E-14 | 2539.133 | 2251.505 | 2498.371 | 3939.704 | 4154.153 | 4217.899 |
| 3210  | ST3GAL2   | 1932.31  | 0.756966 | 0.123049 | 6.151756 | 7.66E-10 | 6.35E-09 | 1556.872 | 1274.922 | 1481.908 | 2475.429 | 2162.641 | 2642.091 |
| 21666 | LOC103234 | 6.707305 | 0.756961 | 0.968985 | 0.78119  | 0.434691 | 0.533382 | 7.047123 | 4.379295 | 3.478657 | 4.464254 | 12.83466 | 8.039836 |
| 1647  | NDFIP1    | 5485.014 | 0.756821 | 0.085447 | 8.857177 | 8.21E-19 | 1.32E-17 | 3948.015 | 4290.614 | 3996.281 | 6799.059 | 6997.031 | 6879.084 |
| 20921 | LOC119620 | 8.138647 | 0.756814 | 0.852438 | 0.887822 | 0.374636 | 0.476063 | 5.96295  | 6.02153  | 6.261582 | 6.696381 | 12.83466 | 11.05477 |
| 3860  | GNPDA1    | 3052.879 | 0.756413 | 0.137883 | 5.485894 | 4.11E-08 | 2.83E-07 | 2549.432 | 1786.205 | 2477.499 | 3863.812 | 3636.488 | 4003.838 |
| 2469  | DBT       | 1086     | 0.756129 | 0.105528 | 7.165219 | 7.77E-13 | 8.36E-12 | 791.9882 | 832.6134 | 798.0039 | 1370.526 | 1371.17  | 1351.697 |
| 6662  | PTGER4    | 212.3894 | 0.756006 | 0.195212 | 3.872753 | 0.000108 | 0.000429 | 167.5047 | 152.1805 | 155.8438 | 272.3195 | 231.024  | 295.464  |
| 19355 | LOC103222 | 15.88493 | 0.755968 | 0.671248 | 1.126214 | 0.260075 | 0.357225 | 8.131296 | 14.23271 | 12.52316 | 31.24978 | 17.11289 | 12.05975 |
| 5424  | FKBP7     | 452.2841 | 0.755583 | 0.169892 | 4.448885 | 8.63E-06 | 4.23E-05 | 318.7468 | 399.6106 | 288.7285 | 566.9603 | 616.0639 | 523.5943 |
| 15217 | LOC119618 | 38.67826 | 0.755484 | 0.421458 | 1.792547 | 0.073045 | 0.127615 | 29.27266 | 21.89647 | 34.78657 | 53.57105 | 51.33866 | 41.20416 |
| 3420  | ZNF251    | 657.8408 | 0.755224 | 0.127448 | 5.925747 | 3.11E-09 | 2.42E-08 | 480.2885 | 523.8731 | 464.7486 | 843.744  | 787.1927 | 847.1977 |
| 17213 | LOC119627 | 25.61042 | 0.754988 | 0.515141 | 1.465594 | 0.142759 | 0.220474 | 21.68345 | 22.9913  | 12.52316 | 33.4819  | 27.80844 | 35.17428 |
| 3735  | ARID5B    | 6464.463 | 0.754728 | 0.134586 | 5.60776  | 2.05E-08 | 1.46E-07 | 4222.853 | 5924.638 | 4287.097 | 7785.659 | 7963.909 | 8602.624 |
| 2905  | DDR1      | 3414.655 | 0.754507 | 0.115381 | 6.539266 | 6.18E-11 | 5.66E-10 | 2639.961 | 2411.896 | 2579.772 | 4042.382 | 3882.486 | 4931.434 |
| 10779 | LOC103215 | 268.5081 | 0.754492 | 0.282212 | 2.673494 | 0.007507 | 0.018511 | 130.6428 | 308.7403 | 160.0182 | 348.2118 | 318.7275 | 344.708  |
| 12101 | CALR3     | 87.14598 | 0.754272 | 0.316113 | 2.386081 | 0.017029 | 0.037411 | 44.99317 | 78.8273  | 70.26887 | 109.3742 | 121.9293 | 97.48301 |
| 22855 | LOC119627 | 4.271014 | 0.754144 | 1.289112 | 0.585011 | 0.558541 | 0.649696 | 2.168345 | 4.926706 | 2.087194 | 11.16063 | 4.278221 | 1.004979 |
| 16884 | LOC103227 | 30.35567 | 0.753936 | 0.49955  | 1.50923  | 0.13124  | 0.206646 | 21.14137 | 22.9913  | 22.95914 | 29.01765 | 59.8951  | 26.12947 |
| 15050 | LOC119627 | 36.62072 | 0.75365  | 0.413158 | 1.824118 | 0.068134 | 0.102351 | 27.10432 | 28.46541 | 25.74206 | 46.87467 | 51.33866 | 40.19918 |
| 15541 | RNF227    | 33.23762 | 0.753632 | 0.433692 | 1.737713 | 0.082261 | 0.140719 | 26.56223 | 21.34906 | 26.43779 | 37.94616 | 44.92132 | 42.20914 |
| 1614  | METTL9    | 7666.653 | 0.75259  | 0.084139 | 8.944566 | 3.73E-19 | 6.15E-18 | 5785.688 | 5874.824 | 5475.406 | 9424.04  | 9448.452 | 9991.506 |
| 13305 | LOC103225 | 56.17806 | 0.752563 | 0.350707 | 2.145844 | 0.       |          |          |          |          |          |          |          |



|       |           |          |          |          |          |          |          |          |          |          |          |          |          |
|-------|-----------|----------|----------|----------|----------|----------|----------|----------|----------|----------|----------|----------|----------|
| 10399 | LOC119621 | 119.3034 | 0.751814 | 0.271742 | 2.76665  | 0.005664 | 0.014479 | 80.22878 | 73.90059 | 114.0999 | 142.8561 | 136.9031 | 167.8316 |
| 19657 | TSPAN11   | 13.54153 | 0.751747 | 0.697943 | 1.077089 | 0.28144  | 0.380633 | 8.131296 | 9.853413 | 11.82743 | 17.85702 | 23.53022 | 10.04979 |
| 5338  | BDKRB2    | 477.6168 | 0.751688 | 0.167186 | 4.496129 | 6.92E-06 | 3.45E-05 | 356.1507 | 379.9038 | 336.0383 | 524.5498 | 545.4732 | 723.5852 |
| 13927 | LOC119621 | 70.57177 | 0.751607 | 0.370853 | 2.026697 | 0.042693 | 0.081497 | 72.63957 | 31.74989 | 52.87558 | 91.51721 | 96.25998 | 78.3884  |
| 12932 | IL2RG     | 81.89655 | 0.751309 | 0.339033 | 2.216032 | 0.026689 | 0.054867 | 60.17159 | 76.63765 | 44.52681 | 111.6063 | 124.0684 | 74.36848 |
| 5634  | GHR       | 335.5565 | 0.751304 | 0.172444 | 4.356799 | 1.32E-05 | 6.23E-05 | 230.9288 | 291.2231 | 228.8956 | 406.2471 | 412.8484 | 443.1959 |
| 3073  | ATP2B4    | 3669.609 | 0.750712 | 0.119033 | 6.306755 | 2.85E-10 | 2.47E-09 | 2612.314 | 3137.217 | 2460.802 | 4470.95  | 4329.56  | 5006.808 |
| 3120  | MAPT      | 724.2331 | 0.749593 | 0.119823 | 6.255853 | 3.95E-10 | 3.37E-09 | 529.0763 | 564.929  | 526.6686 | 881.6902 | 930.5131 | 912.5214 |
| 1874  | EPDR1     | 4911.45  | 0.749442 | 0.090949 | 8.240229 | 1.72E-16 | 2.44E-15 | 3808.157 | 3643.026 | 3544.056 | 6026.743 | 5893.25  | 6553.471 |
| 2518  | IKBK      | 1760.352 | 0.749402 | 0.105557 | 7.09952  | 1.25E-12 | 1.32E-11 | 1366.058 | 1231.677 | 1344.849 | 2229.895 | 2062.103 | 2327.532 |
| 24654 | LOC119611 | 1.146115 | 0.74925  | 2.441511 | 0.30688  | 0.758935 | 0.818378 | 0        | 0.547412 | 2.087194 | 2.232127 | 0        | 2.009959 |
| 2388  | GLIS3     | 6647.938 | 0.749143 | 0.102776 | 7.289075 | 3.12E-13 | 3.47E-12 | 4545.936 | 5546.377 | 4788.719 | 8156.192 | 8171.403 | 8679.003 |
| 16808 | SLC35D3   | 27.41587 | 0.748694 | 0.491237 | 1.524099 | 0.127484 | 0.20164  | 19.51511 | 22.9913  | 18.08902 | 42.41041 | 36.36488 | 25.12449 |
| 5624  | ALKAL1    | 435.4152 | 0.748661 | 0.171625 | 4.362191 | 1.29E-05 | 6.09E-05 | 280.2587 | 372.24   | 319.3407 | 600.4422 | 566.8643 | 473.3453 |
| 13416 | SH2D4B    | 107.3694 | 0.748588 | 0.352503 | 2.123635 | 0.033701 | 0.066781 | 85.64965 | 60.76271 | 91.83654 | 151.7846 | 181.8244 | 72.35852 |
| 8541  | EFNA3     | 128.7806 | 0.748298 | 0.230732 | 3.24315  | 0.001182 | 0.00368  | 92.15468 | 102.366  | 93.228   | 171.8738 | 158.2942 | 154.7668 |
| 3344  | RHBDD2    | 1186.951 | 0.748166 | 0.124689 | 6.000242 | 1.97E-09 | 1.57E-08 | 932.9306 | 821.1177 | 908.6252 | 1421.865 | 1366.892 | 1670.276 |
| 2386  | SCML1     | 1783.244 | 0.747364 | 0.10247  | 7.293497 | 3.02E-13 | 3.37E-12 | 1381.236 | 1377.836 | 1235.619 | 2154.003 | 2267.457 | 2283.313 |
| 23311 | C1QTNF5   | 3.076554 | 0.747303 | 1.460282 | 0.511752 | 0.608825 | 0.694333 | 1.626259 | 2.737059 | 2.782925 | 0        | 4.278221 | 7.034856 |
| 19920 | LOC103231 | 12.73979 | 0.746971 | 0.715325 | 1.04424  | 0.296375 | 0.395529 | 9.757555 | 9.853413 | 8.348776 | 22.32127 | 17.11289 | 9.044815 |
| 18174 | LOC119621 | 22.36603 | 0.746969 | 0.571587 | 1.306834 | 0.191269 | 0.279789 | 16.80468 | 13.6853  | 18.78475 | 33.4819  | 36.36488 | 15.07469 |
| 1818  | MGAT2     | 2494.468 | 0.746965 | 0.088858 | 8.406267 | 4.23E-17 | 6.19E-16 | 1863.693 | 1864.485 | 1860.386 | 3189.709 | 3043.954 | 3144.581 |
| 19737 | LOC103221 | 13.05168 | 0.746395 | 0.70254  | 1.062424 | 0.288043 | 0.387984 | 11.38381 | 6.568942 | 11.1317  | 22.32127 | 12.83466 | 14.06971 |
| 2055  | STXBP5    | 2708.035 | 0.746054 | 0.094719 | 7.876527 | 3.37E-15 | 4.35E-14 | 1997.046 | 2046.773 | 2029.448 | 3381.672 | 3189.414 | 3603.856 |
| 18240 | LOC103231 | 20.0612  | 0.745513 | 0.576114 | 1.294039 | 0.195652 | 0.285149 | 9.757555 | 15.87494 | 19.48048 | 22.32127 | 27.80844 | 25.12449 |
| 14935 | LOC119611 | 20848.91 | 0.745205 | 0.40334  | 1.847585 | 0.064662 | 0.115102 | 8199.056 | 23100.23 | 15443.15 | 26894.9  | 27600.94 | 23855.2  |
| 18685 | LOC119621 | 3200.654 | 0.745115 | 0.605274 | 1.231038 | 0.218309 | 0.310609 | 1138.381 | 4500.82  | 1536.871 | 4118.274 | 3585.149 | 4324.427 |
| 1738  | HSPB1     | 7299.958 | 0.745012 | 0.086405 | 8.62237  | 6.56E-18 | 1.00E-16 | 5152.531 | 5745.087 | 5469.84  | 9325.827 | 8984.265 | 9122.199 |
| 14376 | MYO15B    | 52.58431 | 0.744983 | 0.382324 | 1.948565 | 0.051347 | 0.094955 | 45.53526 | 28.46541 | 43.13534 | 66.96381 | 79.14709 | 52.25893 |
| 4748  | TRIM24    | 5778.152 | 0.744943 | 0.153718 | 4.846177 | 1.26E-06 | 7.05E-06 | 3624.932 | 5636.699 | 3693.638 | 7176.288 | 7279.394 | 7257.962 |
| 3027  | LRIG3     | 1723.487 | 0.74491  | 0.116963 | 6.36878  | 1.91E-10 | 1.67E-09 | 1246.257 | 1409.038 | 1212.66  | 2147.306 | 1967.982 | 2357.682 |
| 3642  | PINK1     | 1586.811 | 0.744572 | 0.130572 | 5.702375 | 1.18E-08 | 8.62E-08 | 1304.802 | 1049.936 | 1208.485 | 1924.093 | 1790.436 | 2243.114 |
| 13403 | SRCIN1    | 145.5015 | 0.744555 | 0.350046 | 2.127021 | 0.033418 | 0.066286 | 79.14461 | 84.84883 | 160.7139 | 232.1412 | 209.6328 | 106.5278 |
| 19625 | TRIL      | 12.98654 | 0.744543 | 0.688835 | 1.081634 | 0.279415 | 0.37852  | 12.46799 | 8.758589 | 7.653045 | 17.5702  | 17.11289 | 14.06971 |
| 16996 | LOC103221 | 24.89579 | 0.744539 | 0.498884 | 1.49254  | 0.135558 | 0.212035 | 16.80468 | 19.15941 | 19.48048 | 35.71403 | 32.08666 | 26.12947 |
| 13791 | CEP295NL  | 59.35214 | 0.744476 | 0.363527 | 2.047921 | 0.040568 | 0.078203 | 54.75072 | 44.88777 | 34.09084 | 55.80317 | 79.14709 | 87.43321 |
| 23192 | TRNAC-GC  | 3.736107 | 0.74442  | 1.402839 | 0.530653 | 0.595659 | 0.682805 | 1.626259 | 3.831883 | 2.782925 | 11.16063 | 0        | 3.014938 |
| 20039 | LOC119621 | 11.87776 | 0.744249 | 0.728634 | 1.02143  | 0.307051 | 0.407281 | 11.38381 | 5.474118 | 9.740239 | 15.62489 | 14.97377 | 14.06971 |
| 19789 | RCSO1     | 20.11136 | 0.743969 | 0.705302 | 1.054825 | 0.291506 | 0.391615 | 8.673382 | 14.23271 | 21.56767 | 20.08914 | 47.06043 | 9.044815 |
| 21378 | LOC103221 | 7.34171  | 0.743886 | 0.906759 | 0.820378 | 0.412001 | 0.512363 | 5.420864 | 6.568942 | 4.174388 | 11.16063 | 10.69555 | 6.029877 |
| 12180 | UBE2L5    | 100.6528 | 0.743612 | 0.313712 | 2.370366 | 0.01777  | 0.038787 | 68.84497 | 101.2712 | 54.26705 | 131.6955 | 143.3204 | 104.5179 |
| 17672 | LOC119621 | 22.5765  | 0.743352 | 0.534637 | 1.390386 | 0.164412 | 0.247334 | 21.14137 | 15.87494 | 13.2189  | 29.01765 | 32.08666 | 24.11951 |
| 2440  | DNAJB1    | 2844.661 | 0.742851 | 0.103024 | 7.210464 | 5.58E-13 | 6.08E-12 | 2115.763 | 2240.557 | 2032.231 | 3504.439 | 3302.787 | 3872.186 |
| 4065  | NPDC1     | 5564.557 | 0.742353 | 0.139489 | 5.321936 | 1.03E-07 | 6.71E-07 | 4573.041 | 3328.264 | 4593.914 | 6937.451 | 6184.169 | 7770.501 |
| 9300  | BACH2     | 122.9014 | 0.742157 | 0.244753 | 3.032272 | 0.002427 | 0.006938 | 87.27591 | 89.77554 | 97.40239 | 171.8738 | 160.4333 | 130.6473 |
| 17420 | LOC103221 | 26.28083 | 0.741129 | 0.519784 | 1.425841 | 0.153914 | 0.234892 | 26.02015 | 12.59047 | 20.17621 | 31.24978 | 38.50399 | 29.1444  |
| 23418 | KLB       | 2.798665 | 0.741034 | 1.492149 | 0.496622 | 0.619456 | 0.70324  | 3.794605 | 1.642235 | 0.695731 | 2.232127 | 6.417332 | 2.009959 |
| 20344 | LOC119611 | 11.89436 | 0.740728 | 0.763371 | 0.970339 | 0.331878 | 0.433689 | 10.84173 | 11.49565 | 4.174388 | 20.08914 | 10.69555 | 14.06971 |
| 18686 | LOC103211 | 20.46757 | 0.740321 | 0.601484 | 1.230823 | 0.218389 | 0.310692 | 9.215468 | 20.25424 | 16.00182 | 35.71403 | 23.53022 | 18.08963 |
| 21051 | LOC119621 | 8.450595 | 0.740042 | 0.848047 | 0.872642 | 0.382858 | 0.483532 | 6.505036 | 8.211177 | 4.174388 | 8.928508 | 12.83466 | 10.04979 |
| 12961 | LOC119621 | 60.56154 | 0.739687 | 0.334508 | 2.11265  | 0.027018 | 0.055417 | 52.04029 | 37.224   | 46.614   | 78.12444 | 77.00798 | 72.35852 |
| 6712  | INPP5J    | 214.5441 | 0.739678 | 0.19209  | 3.850675 | 0.000118 | 0.000467 | 155.5788 | 180.0985 | 146.7993 | 261.1589 | 265.2497 | 278.3793 |
| 24862 | LOC119621 | 0.862664 | 0.739313 | 2.720662 | 0.27174  | 0.785822 | 0.840214 | 0        | 0.547412 | 1.391463 | 2.232127 | 0        | 1.004979 |
| 24864 | LOC119621 | 0.862664 | 0.739313 | 2.720662 | 0.27174  | 0.785822 | 0.840214 | 0        | 0.547412 | 1.391463 | 2.232127 | 0        | 1.004979 |
| 2829  | CBLN4     | 2091.16  | 0.739121 | 0.111149 | 6.649795 | 2.94E-11 | 2.76E-10 | 1661.495 | 1408.491 | 1633.577 | 2658.463 | 2434.308 | 2750.629 |
| 24871 | TRNAA-UG  | 0.847161 | 0.739071 | 2.734904 | 0.270237 | 0.786978 | 0.841146 | 0        | 0.547412 | 1.391463 | 0        | 2.139111 | 1.004979 |
| 24872 | LOC119621 | 0.847161 | 0.739071 | 2.734904 | 0.270237 | 0.786978 | 0.841146 | 0        | 0.547412 | 1.391463 | 0        | 2.139111 | 1.004979 |
| 21084 | LOC119621 | 14.1791  | 0.738988 | 0.85194  | 0.867418 | 0.385713 | 0.486349 | 20.59928 | 4.379295 | 6.261582 | 17.85702 | 29.94755 | 6.029877 |
| 23511 | UTF1      | 3.08336  | 0.738828 | 1.533967 | 0.481645 | 0.630058 | 0.712457 | 1.084173 | 4.926706 | 0.695731 | 2.232127 | 8.556443 | 1.004979 |
| 22978 | LOC103241 | 4.202954 | 0.738597 | 1.300617 | 0.567882 | 0.570115 | 0.659592 | 7.047123 | 1.094824 | 1.391463 | 2.232127 | 6.417332 | 7.034856 |
| 17320 | MYOM1     | 29.38235 | 0.738183 | 0.510726 | 1.445361 | 0.148357 | 0.227717 | 23.30971 | 22.9913  | 18.78475 | 33.4819  | 55.61688 | 22.10955 |
| 5229  | ARHGEF37  | 400.4971 | 0.737885 | 0.161684 | 4.563747 | 5.02E-06 | 2.55E-05 | 307.9051 | 308.7403 | 287.3371 | 433.0326 | 494.1346 | 571.8333 |
| 2755  | OTUB2     | 1478.184 | 0.737515 | 0.108971 | 6.767986 | 1.31E-11 | 1.26E-10 | 1177.954 | 1098.656 | 1051.25  | 1828.112 | 1743.375 | 1969.76  |
| 11557 | LOC119621 | 78.93888 | 0.737499 | 0.294579 | 2.503573 | 0.012295 | 0.028282 | 59.6295  | 53.64636 | 65.39875 | 89.28508 | 94.12087 | 111.5527 |
| 22447 | TRNAT-AG  | 4.777326 | 0.73716  | 1.134824 | 0.649582 | 0.515963 | 0.611078 | 3.252518 | 3.284471 | 4.174388 | 2.232127 | 10.69555 | 5.024897 |
| 8428  | SH2B2     | 149.7465 | 0.736776 | 0.224988 | 3.274737 | 0.001058 | 0.003336 | 107.3331 | 102.9134 | 125.9274 | 205.3557 | 186.1026 | 170.8465 |
| 3342  | ARHGAP35  | 730.8491 | 0.73635  | 0.1227   | 6.001197 | 1.96E-09 | 1.56E-08 | 554.0123 | 518.399  | 574.6741 | 906.2436 | 877.0354 | 954.7305 |
| 3405  | PITPNA    | 4727.251 | 0.736107 | 0.1239   | 5.941127 | 2.83E-09 | 2.21E-08 | 3217.283 | 4244.631 | 3178.101 | 5792.37  | 5942.449 | 5988.673 |
| 22379 | LOC103231 | 4.805137 | 0.735633 | 1.111193 | 0.661582 | 0.508239 | 0.60376  | 3.252518 | 3.831883 | 3.478657 | 6.696381 | 8.556443 | 3.014938 |
| 5266  | LYSMD4    | 340.9917 | 0.735345 | 0.161833 | 4.543863 | 5.52E-06 | 2.79E-05 | 242.8547 | 249.0724 | 278.2925 |          |          |          |



|       |            |          |          |          |          |          |          |          |          |          |          |          |          |
|-------|------------|----------|----------|----------|----------|----------|----------|----------|----------|----------|----------|----------|----------|
| 10910 | ASTN2      | 92.35566 | 0.733972 | 0.277065 | 2.649096 | 0.008071 | 0.019665 | 79.14461 | 61.31012 | 66.79021 | 118.3027 | 124.0684 | 104.5179 |
| 14316 | LOC119621  | 48.6209  | 0.733917 | 0.374733 | 1.958509 | 0.05017  | 0.093167 | 34.15144 | 38.86624 | 37.56949 | 46.87467 | 59.8951  | 74.36848 |
| 3425  | CDC37L1    | 1668.763 | 0.733672 | 0.123947 | 5.919241 | 3.23E-09 | 2.51E-08 | 1161.149 | 1425.46  | 1170.22  | 2060.253 | 2258.901 | 1936.595 |
| 2672  | FOXO3      | 3720.646 | 0.73366  | 0.106733 | 6.873789 | 6.25E-12 | 6.22E-11 | 2717.479 | 2946.17  | 2725.876 | 4453.093 | 4282.5   | 5198.759 |
| 2479  | CDC42SE1   | 8537.913 | 0.733256 | 0.102481 | 7.155031 | 8.37E-13 | 8.97E-12 | 6057.815 | 7190.802 | 5994.421 | 10586.98 | 10244.2  | 11153.26 |
| 13203 | SPDEF      | 60.96836 | 0.732681 | 0.337906 | 2.168296 | 0.030136 | 0.060681 | 47.16151 | 46.53    | 42.43961 | 84.82083 | 85.56443 | 59.29379 |
| 2765  | KANSL1L    | 1346.874 | 0.73257  | 0.108572 | 6.747352 | 1.51E-11 | 1.45E-10 | 1081.462 | 934.9794 | 1019.246 | 1703.113 | 1679.202 | 1663.241 |
| 24203 | LOC119615  | 1.425485 | 0.732552 | 1.960638 | 0.373629 | 0.70868  | 0.778427 | 0.542086 | 0.547412 | 2.087194 | 2.232127 | 2.139111 | 1.004979 |
| 2444  | ECE1       | 10328.77 | 0.732511 | 0.101721 | 7.201201 | 5.97E-13 | 6.49E-12 | 7481.876 | 8244.569 | 7563.991 | 12665.09 | 11754.41 | 14262.67 |
| 4639  | FAIM       | 1256.379 | 0.73231  | 0.148712 | 4.924359 | 8.46E-07 | 4.85E-06 | 851.0756 | 1166.535 | 813.31   | 1580.346 | 1606.472 | 1520.534 |
| 4089  | JRK        | 1925.796 | 0.732235 | 0.138036 | 5.304667 | 1.13E-07 | 7.34E-07 | 1658.242 | 1191.716 | 1495.127 | 2357.126 | 2222.536 | 2630.031 |
| 10710 | LOC119623  | 121.0095 | 0.73221  | 0.272254 | 2.689437 | 0.007157 | 0.017766 | 82.39713 | 97.98671 | 93.228   | 180.8023 | 104.8164 | 166.8266 |
| 4465  | SHTN1      | 2668.825 | 0.731861 | 0.145414 | 5.032957 | 4.83E-07 | 2.88E-06 | 1745.518 | 2519.189 | 1752.547 | 3214.263 | 3476.055 | 3305.377 |
| 4365  | ARL8A      | 1774.252 | 0.73181  | 0.143374 | 5.104203 | 3.32E-07 | 2.02E-06 | 1176.327 | 1650.447 | 1173.699 | 2234.359 | 2177.615 | 2233.064 |
| 17740 | LOC103217  | 24.74114 | 0.731527 | 0.530882 | 1.377947 | 0.16822  | 0.252092 | 21.14137 | 12.59047 | 21.56767 | 37.94616 | 32.08666 | 23.11453 |
| 13693 | BCAS1      | 70.55917 | 0.731526 | 0.353473 | 2.069535 | 0.038496 | 0.07474  | 37.94605 | 65.68942 | 54.26705 | 107.1421 | 91.98176 | 66.32864 |
| 20209 | LOC103247  | 12.49979 | 0.731292 | 0.734791 | 0.995238 | 0.319621 | 0.420462 | 8.673382 | 5.474118 | 13.91463 | 15.62489 | 19.252   | 12.05975 |
| 13692 | LOC103237  | 55.88272 | 0.730911 | 0.352994 | 2.070603 | 0.038396 | 0.074551 | 35.7777  | 51.45671 | 38.26523 | 75.89232 | 70.59065 | 63.31371 |
| 6023  | INPP5D     | 252.1425 | 0.730809 | 0.175926 | 4.154067 | 3.27E-05 | 0.000144 | 191.3565 | 202.5424 | 175.3243 | 303.5693 | 314.4493 | 325.6133 |
| 12981 | LOC103228  | 69.45985 | 0.73051  | 0.33094  | 2.207377 | 0.027288 | 0.055885 | 40.65648 | 66.78424 | 49.39693 | 87.05295 | 83.42532 | 89.44317 |
| 20717 | B4GALNT2   | 9.686801 | 0.730163 | 0.796552 | 0.916655 | 0.359324 | 0.46112  | 8.131296 | 6.568942 | 6.957314 | 17.85702 | 8.556443 | 10.04979 |
| 3488  | PPP1R14C   | 738.2591 | 0.730154 | 0.124435 | 5.867779 | 4.42E-09 | 3.37E-08 | 563.2277 | 546.317  | 560.0638 | 863.8331 | 894.1483 | 1001.965 |
| 19921 | LOC119625  | 13.5738  | 0.729845 | 0.698936 | 1.044222 | 0.296383 | 0.395529 | 9.757555 | 13.6853  | 7.653045 | 13.39276 | 12.83466 | 24.11951 |
| 4986  | CUNH4orf2  | 2889.02  | 0.729844 | 0.155413 | 4.696147 | 2.65E-06 | 1.41E-05 | 1846.888 | 2799.464 | 1871.517 | 3729.884 | 3732.748 | 3353.616 |
| 19733 | LOC103247  | 14.46382 | 0.729716 | 0.686015 | 1.063702 | 0.287464 | 0.387293 | 12.46799 | 12.59047 | 6.957314 | 22.32127 | 21.39111 | 11.05477 |
| 4930  | RAPGEF5    | 495.9205 | 0.729611 | 0.154411 | 4.72513  | 2.30E-06 | 1.24E-05 | 381.6288 | 408.9166 | 329.7767 | 647.3168 | 547.6123 | 660.2715 |
| 9832  | SLC35C1    | 136.7672 | 0.729193 | 0.251586 | 2.898382 | 0.003751 | 0.010141 | 121.9694 | 78.8273  | 107.8384 | 171.8738 | 173.268  | 166.8266 |
| 19012 | CUNH10orf1 | 17.30781 | 0.728929 | 0.616349 | 1.182655 | 0.236946 | 0.331328 | 10.29964 | 16.42235 | 11.82743 | 24.5534  | 25.66933 | 15.07469 |
| 3187  | METTL7A    | 950.4321 | 0.728628 | 0.117918 | 6.17908  | 6.45E-10 | 5.38E-09 | 676.5238 | 775.1351 | 695.0356 | 1212.045 | 1135.868 | 1207.985 |
| 21976 | IHH        | 6.242146 | 0.72856  | 0.9956   | 0.73178  | 0.464303 | 0.561699 | 4.336691 | 2.737059 | 6.957314 | 6.696381 | 10.69555 | 6.029877 |
| 2622  | GTF2B      | 2374.239 | 0.728544 | 0.104881 | 6.946411 | 3.75E-12 | 3.80E-11 | 1736.845 | 1673.985 | 1950.831 | 2854.89  | 3129.519 | 2899.366 |
| 9039  | LOC119615  | 181.5829 | 0.728174 | 0.234716 | 3.102363 | 0.00192  | 0.005646 | 152.3263 | 106.1979 | 150.278  | 263.391  | 220.3284 | 196.976  |
| 2950  | IGSF3      | 1509.72  | 0.728102 | 0.112222 | 6.488022 | 8.70E-11 | 7.84E-10 | 1146.513 | 1159.418 | 1108.996 | 1816.951 | 1739.097 | 2087.342 |
| 17741 | LOC103240  | 25.58538 | 0.727605 | 0.528054 | 1.3779   | 0.168234 | 0.2521   | 11.9259  | 25.72836 | 20.17621 | 35.71403 | 27.80844 | 32.15934 |
| 4498  | LOC119627  | 913.63   | 0.727132 | 0.145091 | 5.011564 | 5.40E-07 | 3.19E-06 | 760.5472 | 612.5538 | 695.7314 | 1098.206 | 1003.243 | 1311.498 |
| 5196  | LOC103215  | 461.2818 | 0.726951 | 0.158663 | 4.581731 | 4.61E-06 | 2.36E-05 | 382.713  | 309.2877 | 352.0401 | 604.9064 | 502.691  | 616.0524 |
| 16509 | LOC119627  | 40.18901 | 0.726694 | 0.461806 | 1.573593 | 0.115581 | 0.186125 | 29.27266 | 26.82318 | 34.09084 | 33.4819  | 81.28621 | 36.17926 |
| 4200  | SRPX2      | 480.8195 | 0.726681 | 0.139285 | 5.217207 | 1.82E-07 | 1.15E-06 | 378.3763 | 367.3133 | 342.2998 | 591.5136 | 573.2817 | 632.1321 |
| 21547 | REEP1      | 8.216725 | 0.726485 | 0.911215 | 0.797271 | 0.425294 | 0.524734 | 4.336691 | 4.379295 | 9.740239 | 6.696381 | 17.11289 | 7.034856 |
| 24577 | LOC119628  | 1.413177 | 0.72643  | 0.72643  | 3.19517  | 0.749335 | 0.810557 | 0.542086 | 0        | 2.782925 | 0        | 2.139111 | 3.014938 |
| 20728 | TRNAL-AA   | 12.31074 | 0.726249 | 0.794729 | 0.913833 | 0.360805 | 0.462755 | 12.46799 | 3.831883 | 11.1317  | 24.5534  | 12.83466 | 9.044815 |
| 22810 | IL5        | 3.95363  | 0.725447 | 1.229055 | 0.590248 | 0.555025 | 0.64688  | 3.252518 | 3.831883 | 2.087194 | 2.232127 | 4.278221 | 8.039836 |
| 21952 | LOC103217  | 7.316524 | 0.725377 | 0.985819 | 0.735812 | 0.461845 | 0.559318 | 5.96295  | 8.758589 | 2.087194 | 4.464254 | 8.556443 | 14.06971 |
| 9757  | ETFRF1     | 139.2265 | 0.725157 | 0.248817 | 2.91442  | 0.003564 | 0.00971  | 94.32303 | 122.0728 | 97.40239 | 154.0168 | 211.772  | 155.7718 |
| 23839 | LOC103228  | 2.843632 | 0.724971 | 1.67951  | 0.431656 | 0.665991 | 0.742704 | 0        | 1.094824 | 5.565851 | 2.232127 | 2.139111 | 6.029877 |
| 10028 | ZNF419     | 121.1844 | 0.724836 | 0.253876 | 2.855078 | 0.004303 | 0.011405 | 89.44425 | 100.7238 | 82.0963  | 176.338  | 151.8769 | 126.6274 |
| 3008  | SEL1L      | 8222.802 | 0.724348 | 0.113074 | 6.405957 | 1.49E-10 | 1.32E-09 | 5784.604 | 7121.28  | 5699.431 | 10024.48 | 9694.45  | 11012.57 |
| 3418  | TOM1L2     | 1299.946 | 0.724103 | 0.122193 | 5.925915 | 3.11E-09 | 2.42E-08 | 1058.695 | 940.4535 | 945.4989 | 1640.613 | 1439.621 | 1774.794 |
| 17760 | LOC119625  | 27.82028 | 0.723788 | 0.526248 | 1.375376 | 0.169015 | 0.252436 | 15.17842 | 24.08612 | 22.95914 | 31.24978 | 51.33866 | 22.10955 |
| 20132 | PXDNL      | 11.64231 | 0.723733 | 0.718741 | 1.006945 | 0.313961 | 0.414596 | 7.589209 | 10.94824 | 7.653045 | 15.62489 | 14.97377 | 13.06473 |
| 6365  | LOC119627  | 261.5518 | 0.72344  | 0.181004 | 3.996811 | 6.42E-05 | 0.000268 | 201.114  | 212.9432 | 179.4987 | 305.8014 | 30.171   | 359.7826 |
| 2679  | LOC119620  | 2150.28  | 0.722926 | 0.105375 | 6.86048  | 6.86E-12 | 6.81E-11 | 1600.239 | 1722.158 | 1548.002 | 2723.195 | 2459.977 | 2848.112 |
| 24255 | LMOD3      | 1.704854 | 0.722704 | 1.96486  | 0.367815 | 0.713011 | 0.781505 | 1.084173 | 0.547412 | 2.087194 | 2.232127 | 4.278221 | 0        |
| 2869  | EMP3       | 3273.21  | 0.722493 | 0.10968  | 6.587303 | 4.48E-11 | 4.15E-10 | 2549.974 | 2288.729 | 2577.685 | 4066.935 | 3670.714 | 4485.223 |
| 6084  | LOC103237  | 307.7279 | 0.722354 | 0.174967 | 4.128507 | 3.65E-05 | 0.00016  | 253.1543 | 203.0898 | 242.1145 | 386.158  | 350.8141 | 411.0366 |
| 19689 | LOC119620  | 16.16314 | 0.722053 | 0.673967 | 1.071348 | 0.284013 | 0.383484 | 7.047123 | 16.96977 | 13.2189  | 15.62489 | 14.97377 | 29.1444  |
| 18555 | KRTCAP3    | 18.19746 | 0.72198  | 0.581069 | 1.242502 | 0.214051 | 0.306686 | 13.01007 | 16.42235 | 11.82743 | 24.5534  | 19.252   | 24.11951 |
| 15446 | ACOT6      | 45.0451  | 0.721171 | 0.411474 | 1.75265  | 0.079662 | 0.137111 | 23.30971 | 33.93953 | 44.52681 | 62.49956 | 57.75599 | 48.23901 |
| 22258 | LOC119627  | 5.641206 | 0.720849 | 1.056879 | 0.682054 | 0.495205 | 0.591473 | 5.420864 | 3.284471 | 4.174388 | 2.232127 | 10.69555 | 8.039836 |
| 19359 | LOC119625  | 19.25147 | 0.72081  | 0.64034  | 1.125667 | 0.260306 | 0.357469 | 7.589209 | 21.34906 | 14.61036 | 15.62489 | 34.22577 | 22.10955 |
| 9763  | FUT4       | 123.5962 | 0.720755 | 0.24741  | 2.913195 | 0.003578 | 0.009742 | 101.3702 | 84.30142 | 93.228   | 147.3204 | 179.6853 | 135.6722 |
| 22276 | LOC103247  | 6.242727 | 0.72058  | 1.063287 | 0.677691 | 0.497968 | 0.594293 | 4.878777 | 6.02153  | 2.782925 | 8.928508 | 12.83466 | 2.009959 |
| 24469 | LOC119624  | 1.690239 | 0.720415 | 2.146709 | 0.33559  | 0.73718  | 0.800929 | 0.542086 | 1.094824 | 2.087194 | 0        | 6.417332 | 0        |
| 12066 | LOC103217  | 76.05672 | 0.720211 | 0.300829 | 2.394089 | 0.016662 | 0.036708 | 64.50828 | 55.28859 | 52.17985 | 84.82083 | 109.0946 | 90.44815 |
| 4358  | CHRAC1     | 1192.646 | 0.71979  | 0.14092  | 5.107795 | 3.26E-07 | 1.99E-06 | 807.1666 | 1087.707 | 807.7441 | 1468.74  | 1510.212 | 1474.305 |
| 21625 | LOC103237  | 9.138216 | 0.719677 | 0.915393 | 0.786195 | 0.431753 | 0.530776 | 5.420864 | 12.04306 | 2.782925 | 17.85702 | 10.69555 | 6.029877 |
| 24128 | LOC119627  | 1.972804 | 0.719529 | 1.863447 | 0.386128 | 0.699402 | 0.770624 | 1.084173 | 0.547412 | 2.782925 | 0        | 6.417332 | 1.004979 |
| 22149 | LOC103230  | 5.987496 | 0.719408 | 1.027861 | 0.699908 | 0.483985 | 0.580917 | 3.794605 | 2.189647 | 7.653045 | 6.696381 | 8.556443 | 7.034856 |
| 23041 | TRNAD-GU   | 3.980021 | 0.719133 | 1.294304 | 0.555613 | 0.578475 | 0.667452 | 2.168345 | 6.02153  | 0.695731 | 6.696381 | 4.278221 | 4.019918 |
| 12924 | LOC119620  | 63.96073 | 0.718872 | 0.324253 | 2.217011 | 0.026622 | 0.054763 | 44.99317 | 50.3618  |          |          |          |          |



|       |           |          |          |          |          |          |          |          |          |          |          |          |          |
|-------|-----------|----------|----------|----------|----------|----------|----------|----------|----------|----------|----------|----------|----------|
| 23068 | CUNH17or  | 3.419874 | 0.718276 | 1.303391 | 0.551082 | 0.581577 | 0.670264 | 2.710432 | 2.737059 | 2.087194 | 6.696381 | 4.278221 | 2.009959 |
| 4529  | DOLK      | 570.9792 | 0.718235 | 0.143775 | 4.995549 | 5.87E-07 | 3.44E-06 | 418.4907 | 458.1837 | 421.6132 | 712.0485 | 624.6203 | 790.9188 |
| 16176 | LOC119621 | 44.58887 | 0.717608 | 0.439948 | 1.631119 | 0.102865 | 0.169057 | 34.15144 | 22.9913  | 43.83108 | 40.17829 | 79.14709 | 47.23404 |
| 5312  | KLHDC9    | 339.6702 | 0.717526 | 0.159    | 4.512748 | 6.40E-06 | 3.20E-05 | 245.5651 | 255.0939 | 271.3352 | 383.9258 | 444.935  | 437.1661 |
| 4403  | LOC119615 | 553.6342 | 0.716871 | 0.141141 | 5.0791   | 3.79E-07 | 2.29E-06 | 458.6051 | 384.2831 | 415.3516 | 640.6204 | 697.3501 | 725.5952 |
| 3354  | ENG       | 1468.47  | 0.716655 | 0.119657 | 5.98922  | 2.11E-09 | 1.67E-08 | 1108.567 | 1153.944 | 1075.601 | 1799.094 | 1621.446 | 2052.168 |
| 22116 | LOC103238 | 6.266866 | 0.716598 | 1.01488  | 0.706092 | 0.480131 | 0.577137 | 4.236691 | 2.189647 | 7.653045 | 6.696381 | 10.69555 | 6.029877 |
| 5816  | SERINC2   | 316.7591 | 0.715806 | 0.167799 | 4.26584  | 1.99E-05 | 9.10E-05 | 238.518  | 251.8094 | 229.5914 | 426.3363 | 342.2577 | 412.0416 |
| 17354 | LOC103216 | 59.65939 | 0.71563  | 0.497417 | 1.438693 | 0.150238 | 0.230152 | 48.24569 | 14.78012 | 72.35606 | 71.42806 | 89.84265 | 61.30375 |
| 16192 | LOC119626 | 35.52229 | 0.714936 | 0.439138 | 1.628044 | 0.103516 | 0.169958 | 22.76763 | 32.2973  | 26.43779 | 35.71403 | 40.6431  | 55.27387 |
| 3188  | KDM4C     | 914.3383 | 0.714806 | 0.115684 | 6.178954 | 6.45E-10 | 5.38E-09 | 668.9346 | 741.743  | 667.2064 | 1116.063 | 1127.311 | 1164.771 |
| 17140 | LOC103228 | 27.09269 | 0.714644 | 0.484757 | 1.474232 | 0.140419 | 0.217797 | 16.26259 | 23.53871 | 21.56767 | 37.94616 | 32.08666 | 31.15436 |
| 21295 | LOC119627 | 10.19341 | 0.713683 | 0.855362 | 0.834364 | 0.404076 | 0.504455 | 5.96295  | 6.02153  | 11.1317  | 4.464254 | 23.53022 | 10.04979 |
| 18851 | LOC103247 | 22.82377 | 0.713495 | 0.588671 | 1.212044 | 0.225495 | 0.31801  | 12.46799 | 24.63353 | 13.91463 | 33.4819  | 36.36488 | 16.07967 |
| 2971  | LOC103246 | 3994.792 | 0.712837 | 0.110269 | 6.464509 | 1.02E-10 | 9.09E-10 | 2761.93  | 3181.01  | 3144.706 | 4964.25  | 4472.88  | 5443.974 |
| 3214  | PLEKHG3   | 1813.307 | 0.7128   | 0.115922 | 6.148958 | 7.80E-10 | 6.45E-09 | 1452.249 | 1309.409 | 1365.721 | 2258.913 | 2002.208 | 2491.344 |
| 4788  | GAB1      | 1403.921 | 0.712742 | 0.147869 | 4.82009  | 1.43E-06 | 7.97E-06 | 950.2774 | 1320.905 | 919.7569 | 1770.077 | 1736.958 | 1725.55  |
| 13671 | TRNAR-CC1 | 60.69959 | 0.712618 | 0.343506 | 2.074541 | 0.038029 | 0.073952 | 42.82482 | 37.77142 | 57.7457  | 69.19594 | 81.28621 | 75.37346 |
| 14440 | LOC119627 | 49.68844 | 0.712496 | 0.367957 | 1.936358 | 0.052824 | 0.097246 | 34.69353 | 32.84471 | 45.22254 | 69.19594 | 59.8951  | 56.27885 |
| 2182  | STOM      | 7511.446 | 0.712387 | 0.093188 | 7.644583 | 2.10E-14 | 2.55E-13 | 5682.691 | 5972.263 | 5430.879 | 9073.596 | 8864.475 | 10044.77 |
| 22489 | LOC103214 | 6.041672 | 0.712151 | 1.112087 | 0.640373 | 0.52193  | 0.616964 | 7.589209 | 1.094824 | 4.87012  | 13.39276 | 4.278221 | 5.024897 |
| 22859 | LOC119620 | 4.229805 | 0.712016 | 1.217888 | 0.584632 | 0.558795 | 0.649879 | 3.794605 | 4.379295 | 1.391463 | 2.232127 | 8.556443 | 5.024897 |
| 3178  | OAF       | 2810.405 | 0.711825 | 0.115043 | 6.187439 | 6.11E-10 | 5.12E-09 | 2263.753 | 1971.23  | 2163.029 | 3428.547 | 3129.519 | 3906.355 |
| 9794  | LOC103246 | 148.8924 | 0.711615 | 0.244925 | 2.90544  | 0.003667 | 0.009954 | 90.52842 | 125.9047 | 121.0573 | 216.5163 | 177.5462 | 161.8017 |
| 20548 | LOC119615 | 12.50726 | 0.711126 | 0.754609 | 0.942554 | 0.345909 | 0.447515 | 13.55216 | 5.474118 | 9.044508 | 13.39276 | 23.53022 | 10.04979 |
| 2490  | PTPRS     | 4757.784 | 0.7109   | 0.099475 | 7.146547 | 8.90E-13 | 9.50E-12 | 3430.865 | 3802.87  | 3597.627 | 5837.012 | 5467.567 | 6410.764 |
| 4520  | SKI       | 740.5797 | 0.710787 | 0.142119 | 5.001348 | 5.69E-07 | 3.35E-06 | 499.8036 | 631.1658 | 556.5851 | 933.0291 | 829.9749 | 992.9197 |
| 23053 | LOC119627 | 3.745324 | 0.710574 | 1.283657 | 0.553554 | 0.579884 | 0.668729 | 1.626259 | 3.284471 | 3.478657 | 8.928508 | 2.139111 | 3.014938 |
| 22365 | LOC119624 | 5.408143 | 0.710458 | 1.069118 | 0.664527 | 0.506353 | 0.601903 | 5.96295  | 4.379295 | 2.087194 | 6.696381 | 4.278221 | 9.044815 |
| 19563 | LOC103247 | 14.52656 | 0.710445 | 0.652134 | 1.089416 | 0.275971 | 0.375025 | 11.9259  | 10.94824 | 9.740239 | 20.08914 | 21.39111 | 13.06473 |
| 19949 | LOC103248 | 15.0769  | 0.710364 | 0.684413 | 1.037917 | 0.299309 | 0.398873 | 8.673382 | 15.32753 | 9.740239 | 17.85702 | 27.80844 | 11.05477 |
| 7881  | CRISP1D2  | 208.2066 | 0.709704 | 0.205921 | 3.446491 | 0.000568 | 0.001916 | 153.9525 | 181.7407 | 138.4505 | 279.0159 | 226.7457 | 269.3345 |
| 20593 | LOC103233 | 12.31069 | 0.70947  | 0.75576  | 0.938751 | 0.347859 | 0.449076 | 11.9259  | 9.853413 | 6.261582 | 22.32127 | 6.417332 | 17.08465 |
| 21299 | LOC103233 | 10.00669 | 0.709444 | 0.850611 | 0.834041 | 0.404258 | 0.504593 | 9.215468 | 8.758589 | 4.174388 | 17.85702 | 14.97377 | 5.024897 |
| 19143 | LOC103217 | 18.00783 | 0.708992 | 0.61009  | 1.162109 | 0.245191 | 0.340493 | 16.80468 | 10.40082 | 13.2189  | 29.01765 | 23.53022 | 15.07469 |
| 3141  | ABCC1     | 3400.888 | 0.708797 | 0.113812 | 6.227774 | 4.73E-10 | 4.00E-09 | 2515.823 | 2726.658 | 2509.503 | 4046.846 | 3792.643 | 4813.852 |
| 2649  | BPNT2     | 5433.701 | 0.708305 | 0.102694 | 6.897261 | 5.30E-12 | 5.32E-11 | 3946.931 | 4620.156 | 3811.216 | 6792.362 | 6541.4   | 6890.139 |
| 21329 | CYP27C1   | 10.50914 | 0.708048 | 0.855186 | 0.827946 | 0.407701 | 0.508169 | 9.757555 | 6.02153  | 7.653045 | 8.928508 | 25.66933 | 5.024897 |
| 3447  | DIXDC1    | 1164.874 | 0.707941 | 0.119939 | 5.902516 | 3.58E-09 | 2.76E-08 | 874.9274 | 945.3802 | 837.6606 | 1339.276 | 1401.117 | 1590.883 |
| 15880 | BFS1P1    | 37.576   | 0.707536 | 0.419189 | 1.687869 | 0.091436 | 0.153075 | 32.52518 | 26.82318 | 25.74206 | 42.41041 | 7.75599  | 40.19918 |
| 4559  | MON1A     | 630.6324 | 0.707341 | 0.142419 | 4.966611 | 6.81E-07 | 3.97E-06 | 472.6993 | 457.0889 | 510.6668 | 810.2621 | 673.8199 | 859.2574 |
| 16355 | LOC103247 | 32.4743  | 0.707258 | 0.443273 | 1.595536 | 0.110592 | 0.179767 | 26.02015 | 27.37059 | 20.17621 | 40.17829 | 44.92132 | 36.17926 |
| 3943  | MICALL2   | 1448.919 | 0.707024 | 0.130652 | 5.411519 | 6.25E-08 | 4.21E-07 | 1143.802 | 948.6647 | 1212.66  | 1877.219 | 1610.75  | 1900.416 |
| 3089  | PLCH1     | 1120.791 | 0.706972 | 0.112387 | 6.290514 | 3.16E-10 | 2.72E-09 | 840.2339 | 895.0183 | 822.3545 | 1312.491 | 1373.309 | 1481.34  |
| 3762  | VSIG10    | 737.0709 | 0.706922 | 0.126619 | 5.583077 | 2.36E-08 | 1.67E-07 | 610.3893 | 539.748  | 530.843  | 870.5295 | 926.2349 | 944.6807 |
| 2912  | PGAP6     | 4321.502 | 0.706529 | 0.108173 | 6.531492 | 6.51E-11 | 5.94E-10 | 3436.285 | 3055.653 | 3365.948 | 5272.284 | 4849.364 | 5949.478 |
| 3437  | LOC103227 | 1416.381 | 0.706488 | 0.119479 | 5.913098 | 3.36E-09 | 2.60E-08 | 1118.324 | 985.8887 | 1129.868 | 1683.024 | 1638.559 | 1942.625 |
| 17817 | LOC103233 | 24.26792 | 0.706435 | 0.514077 | 1.374182 | 0.169385 | 0.252742 | 17.88885 | 20.80165 | 16.00182 | 35.71403 | 32.08666 | 23.11453 |
| 2515  | STXBP3    | 2328.252 | 0.706365 | 0.099461 | 7.101958 | 1.23E-12 | 1.30E-11 | 1830.626 | 1625.266 | 1852.733 | 2919.622 | 2859.991 | 2881.276 |
| 2955  | S100A11   | 10046.32 | 0.705812 | 0.10884  | 6.48483  | 8.88E-11 | 7.99E-10 | 7076.938 | 8801.287 | 7031.757 | 12636.07 | 12090.25 | 12641.64 |
| 21921 | LOC119627 | 8.203908 | 0.705511 | 0.952177 | 0.740945 | 0.458727 | 0.556327 | 6.505036 | 7.663765 | 4.174388 | 4.464254 | 21.39111 | 5.024897 |
| 18522 | LOC103233 | 21.67577 | 0.705192 | 0.565279 | 1.247513 | 0.21221  | 0.304589 | 13.55216 | 15.87494 | 19.48048 | 24.5534  | 38.50399 | 18.08963 |
| 4564  | MAP7      | 1919.38  | 0.704762 | 0.141981 | 4.963778 | 6.91E-07 | 4.03E-06 | 1301.007 | 1801.532 | 1276.667 | 2343.733 | 2340.187 | 2453.155 |
| 4972  | EXOSC4    | 915.6732 | 0.704698 | 0.149889 | 4.701469 | 2.58E-06 | 1.38E-05 | 750.2475 | 577.5195 | 765.3045 | 1087.046 | 1039.608 | 1274.314 |
| 5454  | PRR14     | 476.3762 | 0.704659 | 0.158784 | 4.438449 | 9.09E-06 | 4.43E-05 | 312.2417 | 420.9597 | 353.4315 | 580.353  | 605.3683 | 585.903  |
| 3180  | FSCN1     | 4243.894 | 0.704631 | 0.113934 | 6.184567 | 6.23E-10 | 5.21E-09 | 3398.882 | 2875.554 | 3412.562 | 5401.747 | 4697.487 | 5677.129 |
| 20342 | HPX       | 13.81949 | 0.704464 | 0.725754 | 0.970665 | 0.331715 | 0.433519 | 10.29964 | 8.758589 | 11.82743 | 29.01765 | 14.97377 | 8.039836 |
| 2838  | MPP1      | 1564.136 | 0.704431 | 0.106195 | 6.633351 | 3.28E-11 | 3.07E-10 | 1202.89  | 1205.948 | 1164.654 | 1810.255 | 1901.669 | 2099.402 |
| 2190  | CFLAR     | 2918.016 | 0.704075 | 0.092347 | 7.624216 | 2.46E-14 | 2.98E-13 | 2311.998 | 2212.639 | 2137.287 | 3555.778 | 3516.698 | 3773.698 |
| 22933 | LOC119615 | 4.27359  | 0.703893 | 1.226399 | 0.573951 | 0.566001 | 0.656092 | 4.336691 | 1.094824 | 4.174388 | 4.464254 | 8.556443 | 3.014938 |
| 19778 | MCOLN3    | 15.09807 | 0.703776 | 0.666159 | 1.056469 | 0.290754 | 0.390823 | 10.84173 | 12.59047 | 10.43597 | 17.85702 | 27.80844 | 11.05477 |
| 4943  | PRKCD     | 946.0706 | 0.703704 | 0.149149 | 4.718138 | 2.38E-06 | 1.28E-05 | 671.1029 | 863.2684 | 626.854  | 1113.831 | 1123.033 | 1278.334 |
| 22323 | TMEM89    | 5.710483 | 0.703683 | 1.04844  | 0.671172 | 0.502111 | 0.597976 | 2.710432 | 6.568942 | 3.478657 | 8.928508 | 8.556443 | 4.019918 |
| 23976 | LOC119627 | 2.247723 | 0.703672 | 1.713829 | 0.410585 | 0.681377 | 0.755522 | 1.626259 | 2.737059 | 0.695731 | 0        | 6.417332 | 2.009959 |
| 5711  | LOC103233 | 349.6444 | 0.703438 | 0.16284  | 4.319812 | 1.56E-05 | 7.27E-05 | 235.8076 | 293.4127 | 269.248  | 441.9611 | 419.2657 | 438.171  |
| 7573  | CYB561D1  | 282.6953 | 0.703191 | 0.198966 | 3.534227 | 0.000409 | 0.001436 | 258.0331 | 179.0037 | 209.4151 | 305.8014 | 370.0661 | 373.8524 |
| 2918  | CREBRF    | 2154.479 | 0.703175 | 0.107718 | 6.527923 | 6.67E-11 | 6.08E-10 | 1593.192 | 1819.597 | 1504.867 | 2645.07  | 2705.975 | 2658.171 |
| 19237 | LOC119627 | 17.07863 | 0.703038 | 0.612998 | 1.146884 | 0.251429 | 0.347469 | 12.46799 | 16.42235 | 10.43597 | 15.62489 | 21.39111 | 26.12947 |
| 17889 | LOC119627 | 23.70798 | 0.702764 | 0.515876 | 1.362275 | 0.173111 | 0.257262 | 18.43094 | 14.23271 | 21.56767 | 26.78552 | 32.08666 | 29.1444  |
| 18551 | LOC103246 | 27.65704 | 0.701787 | 0.56459  |          |          |          |          |          |          |          |          |          |



|                 |          |          |          |          |          |          |          |          |          |          |          |          |
|-----------------|----------|----------|----------|----------|----------|----------|----------|----------|----------|----------|----------|----------|
| 3300 KCTD7      | 991.2951 | 0.701068 | 0.116021 | 6.042589 | 1.52E-09 | 1.22E-08 | 760.0051 | 789.3678 | 717.299  | 1136.153 | 1270.632 | 1274.314 |
| 2709 HPS3       | 2245.83  | 0.700942 | 0.102707 | 6.824685 | 8.81E-12 | 8.65E-11 | 1661.495 | 1862.842 | 1609.227 | 2714.266 | 2750.896 | 2876.251 |
| 16077 LOC103246 | 37.34106 | 0.700624 | 0.42415  | 1.651831 | 0.098569 | 0.162984 | 35.23561 | 26.27577 | 23.65487 | 40.17829 | 53.47777 | 45.22408 |
| 8547 GSTO1      | 950.4133 | 0.70017  | 0.216002 | 3.241495 | 0.001189 | 0.003698 | 911.2472 | 434.645  | 827.2246 | 1187.492 | 1152.981 | 1188.891 |
| 7990 LOC103246  | 205.5609 | 0.699993 | 0.204968 | 3.415137 | 0.000637 | 0.002121 | 153.9525 | 136.853  | 180.8902 | 249.9982 | 235.3022 | 276.3694 |
| 3776 INF2       | 2635.615 | 0.699936 | 0.125689 | 5.56877  | 2.57E-08 | 1.81E-07 | 2090.827 | 1744.601 | 2195.728 | 3122.746 | 2992.616 | 3667.17  |
| 23383 LOC103234 | 4.336416 | 0.699761 | 1.39529  | 0.501517 | 0.160008 | 0.700389 | 0        | 4.926706 | 4.87012  | 8.928508 | 4.278221 | 3.014938 |
| 20091 RINL      | 14.24568 | 0.699292 | 0.689606 | 1.014046 | 0.310561 | 0.410943 | 14.09425 | 7.116354 | 11.1317  | 13.39276 | 25.66933 | 14.06971 |
| 2588 TBC1D2B    | 1970.696 | 0.69898  | 0.099843 | 7.000757 | 2.55E-12 | 2.62E-11 | 1581.808 | 1515.236 | 1411.639 | 2370.519 | 2421.473 | 2523.503 |
| 9469 LOC103227  | 124.0572 | 0.698773 | 0.23341  | 2.993759 | 0.002756 | 0.007737 | 99.74389 | 88.68071 | 95.3152  | 149.5525 | 158.2942 | 152.7569 |
| 21042 LOC119627 | 10.25301 | 0.698597 | 0.798646 | 0.874727 | 0.381722 | 0.482275 | 6.505036 | 6.568942 | 10.43597 | 6.696381 | 19.252   | 12.05975 |
| 20403 LOC119627 | 15.74074 | 0.698373 | 0.72704  | 0.96057  | 0.336768 | 0.438807 | 8.673382 | 12.04306 | 14.61036 | 17.85702 | 34.22577 | 7.034856 |
| 6058 ZNF471     | 325.0642 | 0.698239 | 0.168587 | 4.141701 | 3.45E-05 | 0.000151 | 235.2655 | 261.6628 | 249.0718 | 348.2118 | 414.9875 | 441.186  |
| 5927 HCN3       | 332.6178 | 0.698188 | 0.16633  | 4.197616 | 2.70E-05 | 0.000121 | 273.7536 | 261.6628 | 226.1127 | 377.2295 | 427.8221 | 429.1262 |
| 3127 MFGE8      | 1146.782 | 0.69816  | 0.11178  | 6.245847 | 4.22E-10 | 3.58E-09 | 912.8734 | 854.5098 | 858.5325 | 1453.115 | 1311.275 | 1490.385 |
| 18308 LOC119627 | 21.39494 | 0.697982 | 0.544894 | 1.28095  | 0.200211 | 0.290726 | 14.09425 | 18.612   | 16.00182 | 22.32127 | 34.22577 | 23.11453 |
| 12685 LOC103246 | 115.4529 | 0.697801 | 0.308415 | 2.262536 | 0.023664 | 0.049595 | 105.1648 | 54.19377 | 105.7512 | 133.9276 | 136.9031 | 156.7768 |
| 6624 NXF3       | 250.2245 | 0.697742 | 0.179291 | 3.891682 | 9.96E-05 | 0.0004   | 207.6191 | 182.2881 | 183.6731 | 312.4978 | 286.6408 | 328.6283 |
| 4202 ZMYND8     | 4367.258 | 0.697521 | 0.133716 | 5.216423 | 1.82E-07 | 1.15E-06 | 2936.482 | 4090.808 | 2967.99  | 5287.909 | 5330.664 | 5589.696 |
| 16954 LOC119627 | 39.9342  | 0.697113 | 0.465073 | 1.498932 | 0.133891 | 0.20995  | 27.6464  | 39.41365 | 22.95914 | 66.96381 | 53.47777 | 29.1444  |
| 2404 GAS1       | 4512.161 | 0.696877 | 0.095897 | 7.26691  | 3.68E-13 | 4.07E-12 | 3413.518 | 3672.586 | 3244.891 | 5696.388 | 5240.821 | 5804.761 |
| 3473 VASN       | 1380.404 | 0.696789 | 0.118372 | 5.886423 | 3.95E-09 | 3.02E-08 | 1022.917 | 1023.113 | 1115.257 | 1868.29  | 1510.212 | 1742.634 |
| 18207 CUNH9orf1 | 21.99177 | 0.696674 | 0.535705 | 1.300441 | 0.193436 | 0.282447 | 18.43094 | 14.23271 | 17.39328 | 24.5534  | 34.22577 | 23.11453 |
| 24073 LOC119627 | 2.313982 | 0.696656 | 1.767383 | 0.394173 | 0.693453 | 0.765814 | 2.710432 | 1.642235 | 0.695731 | 6.696381 | 2.139111 | 0        |
| 19155 LOC119627 | 16.60285 | 0.696655 | 0.600807 | 1.159531 | 0.24624  | 0.341753 | 11.38381 | 12.04306 | 14.61036 | 20.08914 | 21.39111 | 20.09959 |
| 5685 CLCN7      | 2115.447 | 0.696528 | 0.160738 | 4.333297 | 1.47E-05 | 6.87E-05 | 1850.683 | 1233.319 | 1763.679 | 2466.5   | 2344.465 | 3034.033 |
| 22367 LOC103216 | 5.443525 | 0.696419 | 1.048171 | 0.664413 | 0.506426 | 0.601928 | 2.168345 | 5.474118 | 4.87012  | 6.696381 | 6.417332 | 7.034856 |
| 22738 HSPB2     | 5.795543 | 0.696375 | 1.155207 | 0.602814 | 0.546632 | 0.639116 | 3.794605 | 3.284471 | 6.261582 | 13.39276 | 0        | 8.039836 |
| 2736 PLPP5      | 1826.167 | 0.69626  | 0.102386 | 6.800352 | 1.04E-11 | 1.01E-10 | 1451.707 | 1435.861 | 1295.452 | 2189.717 | 2239.649 | 2344.617 |
| 13946 GAB2      | 61.24485 | 0.696206 | 0.344153 | 2.022955 | 0.043078 | 0.082118 | 39.5723  | 55.83601 | 43.83108 | 80.35657 | 85.56443 | 62.30873 |
| 2240 MALT1      | 12111.25 | 0.696074 | 0.092415 | 7.532081 | 4.99E-14 | 5.93E-13 | 9070.731 | 9890.089 | 8778.043 | 14490.97 | 14462.53 | 15975.15 |
| 20230 LOC119627 | 15.21389 | 0.695985 | 0.702513 | 0.990707 | 0.321829 | 0.422927 | 7.047123 | 12.59047 | 14.61036 | 22.32127 | 25.66933 | 9.044815 |
| 3387 MBD5       | 1309.842 | 0.695977 | 0.116887 | 5.954291 | 2.61E-09 | 2.05E-08 | 963.2875 | 1109.056 | 926.7142 | 1687.488 | 1544.438 | 1628.067 |
| 3799 CERCAM     | 1341.344 | 0.695751 | 0.125477 | 5.544832 | 2.94E-08 | 2.06E-07 | 1084.173 | 950.8543 | 1042.206 | 1618.292 | 1480.265 | 1872.277 |
| 7206 LOC119627  | 322.8589 | 0.695708 | 0.189863 | 3.664259 | 0.000248 | 0.000915 | 291.6425 | 210.7535 | 239.3316 | 357.1403 | 385.0399 | 453.2457 |
| 6468 COQ8B      | 860.0063 | 0.695344 | 0.175948 | 3.951986 | 7.75E-05 | 0.000319 | 748.6213 | 505.2611 | 720.082  | 917.4042 | 1022.495 | 1246.175 |
| 11541 LOC119615 | 83.3371  | 0.695258 | 0.277516 | 2.505286 | 0.012235 | 0.028181 | 62.33993 | 62.40495 | 66.09448 | 107.1421 | 100.5382 | 101.5029 |
| 3021 HGSNAT     | 2301.904 | 0.695245 | 0.108845 | 6.387483 | 1.69E-10 | 1.48E-09 | 1910.854 | 1614.317 | 1751.852 | 2714.266 | 2768.009 | 3052.123 |
| 9431 TRNAL-UA   | 162.5113 | 0.694895 | 0.231584 | 3.000613 | 0.002694 | 0.007595 | 137.6899 | 101.2712 | 134.9719 | 194.195  | 181.8244 | 225.1154 |
| 4233 VWA5A      | 753.9112 | 0.694786 | 0.133676 | 5.197535 | 2.02E-07 | 1.27E-06 | 629.3623 | 532.6317 | 568.4125 | 852.6725 | 928.374  | 1012.014 |
| 3024 LOC103247  | 9205.355 | 0.693694 | 0.108776 | 6.377285 | 1.80E-10 | 1.58E-09 | 7534.458 | 6606.166 | 6967.054 | 11256.62 | 10145.8  | 12722.04 |
| 2441 SLC4A7     | 7382.041 | 0.693647 | 0.096228 | 7.208398 | 5.66E-13 | 6.17E-12 | 5714.675 | 6042.332 | 5167.893 | 8852.616 | 8905.118 | 9609.614 |
| 12442 COL15A1   | 81.01468 | 0.693321 | 0.29989  | 2.311917 | 0.020782 | 0.044402 | 58.00324 | 73.90059 | 52.87558 | 104.91   | 106.9555 | 89.44317 |
| 22256 LOC119627 | 6.326991 | 0.693313 | 1.016129 | 0.682308 | 0.495044 | 0.591335 | 3.794605 | 5.474118 | 5.565851 | 8.928508 | 2.139111 | 12.05975 |
| 7453 LOC103224  | 367.3152 | 0.693299 | 0.193655 | 3.580077 | 0.000343 | 0.001225 | 233.6392 | 347.6065 | 259.5078 | 515.6213 | 421.4048 | 426.1113 |
| 23366 LOC119627 | 3.132444 | 0.693142 | 1.375631 | 0.503872 | 0.614351 | 0.698987 | 3.252518 | 1.094824 | 2.782925 | 2.232127 | 6.417332 | 3.014938 |
| 21788 LOC119618 | 8.617386 | 0.693109 | 0.910323 | 0.761388 | 0.446425 | 0.544717 | 3.794605 | 3.831883 | 12.52316 | 8.928508 | 8.556443 | 14.06971 |
| 5174 CPEB2      | 823.8381 | 0.693056 | 0.150939 | 4.591636 | 4.40E-06 | 2.26E-05 | 555.0964 | 758.1654 | 576.7613 | 1026.778 | 951.9042 | 1074.323 |
| 6997 LFNG       | 2848.043 | 0.692858 | 0.185487 | 3.735349 | 0.000187 | 0.000712 | 2597.678 | 1446.262 | 2490.023 | 3339.262 | 3217.222 | 3997.808 |
| 5114 TSHZ1      | 607.8259 | 0.692684 | 0.149884 | 4.621484 | 3.81E-06 | 1.98E-05 | 413.6119 | 532.6317 | 450.1382 | 705.3521 | 725.1585 | 820.0632 |
| 16702 ERVME3R34 | 39.01159 | 0.692608 | 0.449091 | 1.542247 | 0.123014 | 0.195804 | 31.9831  | 36.67659 | 20.87194 | 31.24978 | 62.03421 | 51.25395 |
| 6476 KIAA0825   | 236.6431 | 0.692567 | 0.175399 | 3.948525 | 7.86E-05 | 0.000323 | 178.8885 | 183.9304 | 179.4987 | 301.3371 | 288.7799 | 287.4241 |
| 13578 FMO5      | 61.35874 | 0.692565 | 0.330912 | 2.0929   | 0.036358 | 0.071187 | 46.07734 | 41.05589 | 54.26705 | 75.89232 | 68.45154 | 82.40832 |
| 24383 S100A7    | 1.734544 | 0.692467 | 1.98291  | 0.349217 | 0.726926 | 0.792541 | 0        | 0.547412 | 3.478657 | 2.232127 | 2.139111 | 2.009959 |
| 22520 LOC103246 | 6.949291 | 0.69219  | 1.085665 | 0.637572 | 0.523752 | 0.618293 | 1.626259 | 4.926706 | 9.044508 | 13.39276 | 10.69555 | 2.009959 |
| 15719 LOC103237 | 56.61998 | 0.692121 | 0.403555 | 1.715061 | 0.086334 | 0.146014 | 25.47806 | 58.02565 | 45.91827 | 84.82083 | 64.17332 | 61.30375 |
| 6376 ZBTB42     | 585.7891 | 0.691552 | 0.173273 | 3.991117 | 6.58E-05 | 0.000274 | 482.4569 | 368.9556 | 496.7522 | 689.7272 | 624.6203 | 852.2226 |
| 3540 B3GALNT1   | 1069.302 | 0.691397 | 0.118907 | 5.814622 | 6.08E-09 | 4.56E-08 | 839.6918 | 733.5318 | 880.1002 | 1345.973 | 1324.11  | 1292.404 |
| 19746 LOC103227 | 19.94075 | 0.691102 | 0.651382 | 1.060977 | 0.2887   | 0.388691 | 11.9259  | 20.80165 | 12.52316 | 13.39276 | 44.92132 | 16.07967 |
| 2699 DENND6A    | 2885.712 | 0.690278 | 0.100991 | 6.835014 | 8.20E-12 | 8.08E-11 | 2136.362 | 2400.948 | 2089.281 | 3566.939 | 3403.325 | 3717.419 |
| 16419 LOC119627 | 37.99404 | 0.689773 | 0.434813 | 1.586366 | 0.112656 | 0.182409 | 29.81475 | 36.12918 | 20.87194 | 40.17829 | 57.75599 | 43.21412 |
| 4380 KCTD21     | 640.9576 | 0.68956  | 0.135399 | 5.092813 | 3.53E-07 | 2.14E-06 | 495.4669 | 509.6404 | 468.9229 | 696.4236 | 832.114  | 843.1778 |
| 6959 ANG        | 334.4316 | 0.68947  | 0.183705 | 3.75314  | 0.000175 | 0.000667 | 264.5381 | 210.7535 | 291.5114 | 455.3539 | 408.5701 | 375.8623 |
| 2037 TRIM38     | 3009.683 | 0.689438 | 0.087297 | 7.897599 | 2.84E-15 | 3.71E-14 | 2375.422 | 2289.824 | 2246.517 | 3718.724 | 3692.105 | 3735.509 |
| 3233 TSC22D3    | 2956.653 | 0.689364 | 0.11244  | 6.130934 | 8.74E-10 | 7.18E-09 | 2449.688 | 2048.415 | 2296.609 | 3609.349 | 3354.126 | 3981.729 |
| 4792 CASP8AP2   | 2089.735 | 0.689065 | 0.143017 | 4.818051 | 1.45E-06 | 8.04E-06 | 1433.276 | 1975.062 | 1391.463 | 2421.858 | 2686.723 | 2630.031 |
| 10609 LOC119627 | 107.8435 | 0.688896 | 0.253336 | 2.719301 | 0.006542 | 0.016394 | 74.26583 | 81.01695 | 92.53227 | 131.6955 | 136.9031 | 130.6473 |
| 2647 LIMD1      | 2600.622 | 0.688617 | 0.099763 | 6.902535 | 5.11E-12 | 5.13E-11 | 2004.635 | 2046.773 | 1927.872 | 3120.514 | 3024.702 | 3479.239 |
| 6120 LOC119627  | 526.7032 | 0.688434 | 0.167473 | 4.110719 | 3.94E-05 | 0.000171 | 448.3054 | 326.8049 | 436.2236 | 691.9594 | 577.5599 | 679.3661 |
| 3490 ADGRL1     | 1151.413 | 0.688289 | 0.117339 | 5.865795 | 4.47E-09 | 3.40E-08 | 826.1396 | 913.0829 | 910.7124 | 1319.187 | 1394.7   | 1544.653 |
| 14683 FYB1      | 63.06582 | 0.688252 | 0.363709 | 1.892313 | 0.058449 | 0.105828 | 31.44101 | 61.31012 | 52.17985 | 73.66019 | 83.42532 | 76.3784  |



|       |           |          |          |          |          |          |          |          |          |          |          |          |          |
|-------|-----------|----------|----------|----------|----------|----------|----------|----------|----------|----------|----------|----------|----------|
| 3293  | TFPI      | 4973.124 | 0.687829 | 0.113719 | 6.04848  | 1.46E-09 | 1.18E-08 | 3538.198 | 4427.467 | 3462.655 | 6151.742 | 6057.961 | 6200.723 |
| 9905  | PWWP2B    | 216.3537 | 0.687604 | 0.238427 | 2.883917 | 0.003928 | 0.010542 | 179.9727 | 126.9995 | 192.0219 | 292.4086 | 203.2155 | 303.5038 |
| 15198 | TRNAD-GU  | 65.1276  | 0.687578 | 0.382764 | 1.79635  | 0.072439 | 0.126713 | 44.99317 | 33.93953 | 70.9646  | 100.4457 | 62.03421 | 78.3884  |
| 18452 | LOC103232 | 24.48699 | 0.687464 | 0.547014 | 1.256758 | 0.208841 | 0.300891 | 17.34676 | 12.04306 | 27.13352 | 35.71403 | 23.53022 | 31.15436 |
| 3056  | RHPN2     | 1881.579 | 0.687463 | 0.108575 | 6.331674 | 2.43E-10 | 2.11E-09 | 1516.758 | 1415.06  | 1397.724 | 2245.52  | 2164.78  | 2549.633 |
| 14728 | AMHR2     | 68.34102 | 0.687447 | 0.364878 | 1.884045 | 0.059559 | 0.107508 | 66.67662 | 34.48694 | 54.96278 | 87.05295 | 100.5382 | 66.32864 |
| 20297 | LOC103242 | 12.35828 | 0.687034 | 0.702244 | 0.978342 | 0.327905 | 0.42947  | 9.215468 | 10.94824 | 8.348776 | 17.85702 | 10.69555 | 17.08465 |
| 12875 | LOC103242 | 77.70265 | 0.686843 | 0.30891  | 2.223441 | 0.026186 | 0.054073 | 59.6295  | 51.45671 | 66.79021 | 89.28508 | 117.6511 | 81.40334 |
| 2661  | PRKACB    | 3112.109 | 0.686455 | 0.099788 | 6.879115 | 6.02E-12 | 6.02E-11 | 2307.662 | 2607.322 | 2242.342 | 3749.973 | 3809.756 | 3955.599 |
| 7021  | LOC103228 | 457.1988 | 0.686168 | 0.18413  | 3.726551 | 0.000194 | 0.000735 | 325.2518 | 419.3174 | 303.3389 | 658.4775 | 560.447  | 476.3603 |
| 5809  | VKORC1    | 1044.259 | 0.685922 | 0.160671 | 4.269121 | 1.96E-05 | 8.98E-05 | 907.9947 | 610.3642 | 885.666  | 1270.08  | 1208.598 | 1382.852 |
| 4351  | RSU1      | 2357.943 | 0.685888 | 0.134046 | 5.116801 | 3.11E-07 | 1.90E-06 | 1566.088 | 2189.1   | 1666.972 | 2977.657 | 2885.66  | 2862.182 |
| 4447  | FZD1      | 736.4016 | 0.685287 | 0.13585  | 5.044459 | 4.55E-07 | 2.72E-06 | 578.9482 | 532.0843 | 587.893  | 857.1368 | 834.2532 | 1028.094 |
| 22866 | MHC-DQB1  | 5.474566 | 0.685277 | 1.174496 | 0.583465 | 0.55958  | 0.650564 | 8.673382 | 2.189647 | 1.391463 | 11.16063 | 6.417332 | 3.014938 |
| 3564  | RMDN3     | 2317.324 | 0.685227 | 0.118365 | 5.789082 | 7.08E-09 | 5.28E-08 | 1959.1   | 1612.675 | 1764.375 | 2723.195 | 2673.888 | 3170.71  |
| 23469 | TRNAV-AA  | 2.867158 | 0.685074 | 1.399196 | 0.48962  | 0.624403 | 0.707305 | 1.626259 | 2.737059 | 2.087194 | 4.464254 | 4.278221 | 2.009959 |
| 23316 | LOC119622 | 3.687621 | 0.685001 | 1.339682 | 0.511316 | 0.60913  | 0.694533 | 3.794605 | 3.831883 | 0.695731 | 2.232127 | 8.556443 | 3.014938 |
| 16903 | INKA1     | 40.14476 | 0.684934 | 0.454862 | 1.505807 | 0.132117 | 0.207793 | 41.74065 | 18.612   | 32.69937 | 46.87467 | 40.6431  | 60.29877 |
| 7578  | LOC119622 | 1873.351 | 0.684718 | 0.193779 | 3.533493 | 0.00041  | 0.001439 | 1135.129 | 2042.393 | 1132.651 | 2310.251 | 2310.24  | 2309.443 |
| 18792 | LOC103232 | 19.55686 | 0.68433  | 0.561252 | 1.219291 | 0.222734 | 0.315124 | 16.80468 | 14.23271 | 13.91463 | 29.01765 | 19.252   | 24.11951 |
| 3226  | IL4R      | 3200.113 | 0.684122 | 0.111508 | 6.135191 | 8.51E-10 | 7.01E-09 | 2412.826 | 2568.456 | 2390.533 | 3868.276 | 3514.559 | 4446.029 |
| 2862  | ANKRD52   | 4738.926 | 0.683921 | 0.103721 | 6.593869 | 4.29E-11 | 3.98E-10 | 3431.949 | 3895.93  | 3586.495 | 5620.496 | 5471.845 | 6426.844 |
| 3820  | FASTKD5   | 912.488  | 0.683505 | 0.123693 | 5.525801 | 3.28E-08 | 2.28E-07 | 699.2914 | 741.743  | 663.032  | 1026.778 | 1123.033 | 1221.05  |
| 22429 | LOC119622 | 5.702422 | 0.683353 | 1.048288 | 0.651876 | 0.514481 | 0.609813 | 3.794605 | 4.926706 | 4.174388 | 4.464254 | 12.83466 | 4.019918 |
| 5888  | TACC2     | 1430.318 | 0.683135 | 0.161854 | 4.220684 | 2.44E-05 | 0.00011  | 968.1663 | 1403.564 | 923.2355 | 1705.345 | 1662.089 | 1919.511 |
| 2742  | UBE2V2    | 1949.827 | 0.683104 | 0.100639 | 6.787632 | 1.14E-11 | 1.11E-10 | 1404.004 | 1584.21  | 1502.084 | 2323.644 | 2477.09  | 2407.931 |
| 5255  | CD68      | 2121.992 | 0.683066 | 0.150095 | 4.550903 | 5.34E-06 | 2.70E-05 | 1408.882 | 2047.868 | 1431.119 | 2562.482 | 2470.673 | 2810.928 |
| 3841  | DZIP1L    | 697.8527 | 0.682815 | 0.124083 | 5.502873 | 3.74E-08 | 2.59E-07 | 553.4702 | 527.705  | 528.7558 | 816.9585 | 840.6705 | 919.5562 |
| 2378  | ESYT2     | 9279.035 | 0.682753 | 0.093477 | 7.303974 | 2.79E-13 | 3.12E-12 | 7095.368 | 7526.365 | 6753.464 | 10932.96 | 11057.06 | 12308.99 |
| 7236  | LOC119622 | 425.5362 | 0.682479 | 0.186661 | 3.656245 | 0.000256 | 0.00094  | 300.3158 | 369.503  | 313.7748 | 526.782  | 410.7092 | 632.1321 |
| 22623 | COX6A2    | 4.860232 | 0.682224 | 1.098385 | 0.621115 | 0.534524 | 0.628137 | 2.710432 | 4.926706 | 3.478657 | 4.464254 | 8.556443 | 5.024897 |
| 3792  | PLEKHA5   | 10883.27 | 0.682202 | 0.122873 | 5.552078 | 2.82E-08 | 1.98E-07 | 7757.798 | 10020.37 | 7291.265 | 13225.35 | 13782.29 | 13222.51 |
| 5486  | PSMB10    | 1585.964 | 0.682127 | 0.15448  | 4.415636 | 1.01E-05 | 4.88E-05 | 1374.189 | 915.82   | 1363.633 | 2029.003 | 1916.643 | 1916.496 |
| 20172 | LOC103242 | 21.4226  | 0.682029 | 0.681541 | 1.000715 | 0.316965 | 0.417733 | 16.26259 | 15.32753 | 16.69755 | 35.71403 | 38.50399 | 6.029877 |
| 18077 | LOC103232 | 33.13811 | 0.682001 | 0.513553 | 1.328005 | 0.184177 | 0.27086  | 20.59928 | 27.37059 | 27.13352 | 46.87467 | 57.75599 | 19.09461 |
| 17918 | LOC103228 | 26.17737 | 0.68192  | 0.502213 | 1.357829 | 0.174518 | 0.258941 | 14.09425 | 21.89647 | 24.3506  | 33.4819  | 32.08666 | 31.15436 |
| 20966 | LOC103232 | 10.92353 | 0.681818 | 0.771908 | 0.883289 | 0.37708  | 0.47814  | 10.29964 | 4.379295 | 10.43597 | 13.39276 | 14.97377 | 12.05975 |
| 6116  | TRIM3     | 478.4385 | 0.681207 | 0.165688 | 4.111375 | 3.93E-05 | 0.000171 | 354.5245 | 337.2057 | 415.3516 | 544.639  | 530.4994 | 688.4109 |
| 16184 | LOC103215 | 37.05162 | 0.681003 | 0.418046 | 1.629016 | 0.10331  | 0.169694 | 23.30971 | 31.20247 | 30.61218 | 44.64254 | 51.33866 | 41.20416 |
| 23364 | LOC119622 | 3.460556 | 0.680947 | 1.34938  | 0.504637 | 0.613814 | 0.698435 | 0.542086 | 3.284471 | 4.174388 | 4.464254 | 4.278221 | 4.019918 |
| 23415 | LOC103236 | 3.163909 | 0.680907 | 1.370465 | 0.496844 | 0.619299 | 0.703142 | 1.084173 | 2.189647 | 4.174388 | 2.232127 | 4.278221 | 5.024897 |
| 2422  | NDRG1     | 18620.73 | 0.680852 | 0.094044 | 7.239714 | 4.50E-13 | 4.94E-12 | 14401.61 | 15067.51 | 13455.44 | 22609.21 | 21451    | 24739.58 |
| 14913 | LOC119622 | 61.25171 | 0.680805 | 0.367726 | 1.851389 | 0.064114 | 0.114294 | 39.03022 | 63.49977 | 37.56949 | 84.82083 | 81.28621 | 61.30375 |
| 3737  | LOC103242 | 4864.039 | 0.6808   | 0.121446 | 5.605787 | 2.07E-08 | 1.47E-07 | 3396.713 | 4360.135 | 3457.089 | 6040.136 | 5510.349 | 6419.809 |
| 2914  | LDB1      | 2092.535 | 0.680605 | 0.104232 | 6.529736 | 6.59E-11 | 6.01E-10 | 1504.832 | 1728.727 | 1592.529 | 2598.196 | 2438.586 | 2692.34  |
| 5333  | LMLN      | 519.6862 | 0.680394 | 0.151142 | 4.501696 | 6.74E-06 | 3.36E-05 | 436.9216 | 395.7787 | 368.0419 | 631.6919 | 571.1425 | 714.5404 |
| 5047  | PCYOX1L   | 535.4268 | 0.680193 | 0.145905 | 4.661892 | 3.13E-06 | 1.65E-05 | 388.6759 | 460.9207 | 386.1309 | 671.8702 | 607.5074 | 697.4558 |
| 6423  | FAH       | 442.0103 | 0.680038 | 0.171257 | 3.970876 | 7.16E-05 | 0.000296 | 348.5615 | 284.1067 | 389.6096 | 520.0856 | 502.691  | 607.0076 |
| 18011 | LOC119618 | 42.63805 | 0.679808 | 0.506887 | 1.341144 | 0.179874 | 0.265488 | 41.19856 | 22.44388 | 33.39511 | 49.10679 | 85.56443 | 24.11951 |
| 13281 | LOC119615 | 67.23436 | 0.679242 | 0.315712 | 2.15146  | 0.30144  | 0.062934 | 76.97626 | 47.62483 | 77.22618 | 118.3027 | 77.70354 | 115.5726 |
| 14949 | PROM2     | 81.48413 | 0.679163 | 0.368012 | 1.845491 | 0.064966 | 0.11553  | 47.7036  | 42.69812 | 50.09266 | 69.19594 | 106.9555 | 52.25893 |
| 11316 | SNAP25    | 107.2555 | 0.679143 | 0.265868 | 2.554439 | 0.010636 | 0.024987 | 84.02339 | 82.11177 | 80.70484 | 109.3742 | 164.7115 | 122.6075 |
| 6033  | TLR3      | 1053.187 | 0.679107 | 0.163665 | 4.149371 | 3.33E-05 | 0.000147 | 685.1972 | 1026.945 | 718.6905 | 1227.67  | 1255.658 | 1404.961 |
| 5922  | HPS1      | 940.3143 | 0.678921 | 0.161623 | 4.200644 | 2.66E-05 | 0.000119 | 834.2709 | 595.0366 | 743.7368 | 1127.224 | 998.9647 | 1342.653 |
| 3122  | CLN5      | 1358.024 | 0.678669 | 0.108554 | 6.251923 | 4.05E-10 | 3.45E-09 | 1053.274 | 1042.272 | 1034.553 | 1828.112 | 1600.055 | 1589.878 |
| 24437 | LOC119622 | 1.444867 | 0.678552 | 1.998228 | 0.339577 | 0.734175 | 0.798709 | 1.084173 | 1.642235 | 0.695731 | 2.232127 | 0        | 3.014938 |
| 4408  | ADAMTSL5  | 596.3966 | 0.67841  | 0.133689 | 5.074542 | 3.88E-07 | 2.34E-06 | 456.9788 | 441.7613 | 480.7504 | 714.2806 | 686.6545 | 797.9537 |
| 3323  | PM20D2    | 1933.146 | 0.678364 | 0.112654 | 6.021668 | 1.73E-09 | 1.38E-08 | 1459.839 | 1660.847 | 1339.283 | 2412.929 | 2323.074 | 2402.906 |
| 2426  | TKT       | 62391.4  | 0.678347 | 0.09378  | 7.233426 | 4.71E-13 | 5.16E-12 | 47855.38 | 49917.94 | 46195.87 | 75644.55 | 70791.73 | 83942.92 |
| 5614  | LOC103222 | 983.5374 | 0.678207 | 0.155367 | 4.365208 | 1.27E-05 | 6.01E-05 | 855.4123 | 598.3211 | 818.1801 | 1223.206 | 1101.642 | 1304.463 |
| 17226 | ADAM22    | 36.81083 | 0.678063 | 0.463347 | 1.463402 | 0.143357 | 0.221244 | 19.51511 | 30.65506 | 34.09084 | 42.41041 | 62.03421 | 32.15934 |
| 19017 | LOC103218 | 23.2843  | 0.677812 | 0.573724 | 1.181426 | 0.237433 | 0.331922 | 14.63633 | 20.80165 | 17.39328 | 29.01765 | 42.78221 | 15.07469 |
| 3167  | STMN3     | 2977.522 | 0.677765 | 0.109322 | 6.1997   | 5.66E-10 | 4.75E-09 | 2382.47  | 2173.772 | 2321.656 | 3624.974 | 3292.091 | 4070.167 |
| 4550  | GAA       | 3258.646 | 0.677716 | 0.136289 | 4.972645 | 6.60E-07 | 3.86E-06 | 2768.435 | 2046.773 | 2709.874 | 4006.668 | 3585.149 | 4434.974 |
| 17664 | LOC103242 | 28.12276 | 0.677169 | 0.485879 | 1.393701 | 0.163408 | 0.245935 | 19.51511 | 21.34906 | 23.65487 | 29.01765 | 47.06043 | 28.13943 |
| 19130 | LOC103232 | 21.78159 | 0.677141 | 0.581596 | 1.16428  | 0.24431  | 0.339519 | 17.34676 | 23.53871 | 9.044508 | 24.5534  | 32.08666 | 24.11951 |
| 3682  | TRPM6     | 788.6767 | 0.676882 | 0.119469 | 5.665758 | 1.46E-08 | 1.06E-07 | 604.4263 | 641.5666 | 576.0656 | 953.1182 | 951.9042 | 1004.979 |
| 6912  | AP4S1     | 316.9622 | 0.676736 | 0.179457 | 3.771027 | 0.000163 | 0.000625 | 250.986  | 256.7361 | 220.5468 | 433.0326 | 412.8484 | 327.6233 |
| 4103  | RAB2A     | 4637.669 | 0.676692 | 0.127833 | 5.29358  | 1.20E-07 | 7.77E-07 | 3137.596 | 4304.847 | 3264.372 | 5694.156 | 5899.667 | 5525.377 |
| 21446 | LOC103222 | 10.85287 | 0.676609 | 0.83311  | 0.812148 | 0.416706 | 0.51     |          |          |          |          |          |          |



|       |           |          |          |          |          |          |          |          |          |          |          |          |          |
|-------|-----------|----------|----------|----------|----------|----------|----------|----------|----------|----------|----------|----------|----------|
| 3846  | NAA60     | 2013.028 | 0.675231 | 0.122759 | 5.500478 | 3.79E-08 | 2.62E-07 | 1486.401 | 1692.05  | 1477.733 | 2412.929 | 2201.145 | 2807.913 |
| 19248 | KLHDC8A   | 24.4747  | 0.675147 | 0.589608 | 1.145078 | 0.252177 | 0.348308 | 19.51511 | 15.87494 | 20.17621 | 29.01765 | 49.19955 | 13.06473 |
| 3899  | ABHD4     | 2043.851 | 0.674841 | 0.12394  | 5.444884 | 5.18E-08 | 3.53E-07 | 1523.805 | 1701.356 | 1503.475 | 2430.786 | 2220.397 | 2883.286 |
| 20750 | FCER1G    | 11.74968 | 0.674425 | 0.740738 | 0.910478 | 0.362571 | 0.464437 | 7.047123 | 11.49565 | 8.348776 | 11.16063 | 21.39111 | 11.05477 |
| 3600  | SHISA2    | 1583.056 | 0.674408 | 0.117442 | 5.742483 | 9.33E-09 | 6.89E-08 | 1209.395 | 1293.534 | 1161.176 | 1825.88  | 1822.522 | 2185.83  |
| 18601 | LOC103238 | 21.83923 | 0.674388 | 0.545737 | 1.235738 | 0.216556 | 0.309507 | 14.09425 | 21.34906 | 14.61036 | 26.78552 | 32.08666 | 22.10955 |
| 9024  | LETM2     | 273.9915 | 0.673932 | 0.216781 | 3.108814 | 0.001878 | 0.005534 | 190.8144 | 270.4214 | 170.4542 | 328.1227 | 328.6226 | 305.5138 |
| 20721 | LOC119615 | 11.54763 | 0.673826 | 0.736134 | 0.915357 | 0.360004 | 0.461884 | 10.29964 | 7.663765 | 8.348776 | 20.08914 | 12.83466 | 10.04979 |
| 8667  | RCBTB2    | 187.0973 | 0.673528 | 0.209663 | 3.212431 | 0.001316 | 0.004037 | 156.663  | 131.9262 | 146.1036 | 203.1236 | 222.4675 | 262.2996 |
| 14127 | STPG1     | 58.92198 | 0.673386 | 0.33861  | 1.988676 | 0.046737 | 0.087952 | 49.32986 | 42.69812 | 45.22254 | 60.26743 | 70.59065 | 85.42325 |
| 20109 | CD27      | 17.47729 | 0.672946 | 0.66548  | 1.011219 | 0.311912 | 0.412361 | 11.38381 | 12.04306 | 16.69755 | 11.16063 | 38.50399 | 15.07469 |
| 3758  | MFAP3L    | 1368.546 | 0.672728 | 0.120457 | 5.584796 | 2.34E-08 | 1.66E-07 | 980.6342 | 1192.263 | 994.2001 | 1622.756 | 1655.672 | 1765.749 |
| 22986 | MB        | 4.623617 | 0.67266  | 1.187588 | 0.566409 | 0.571116 | 0.660538 | 5.420864 | 3.831883 | 1.391463 | 8.928508 | 2.139111 | 6.029877 |
| 4062  | LOC103247 | 1824.056 | 0.672172 | 0.126274 | 5.323139 | 1.02E-07 | 6.68E-07 | 1609.997 | 1224.56  | 1387.984 | 2113.824 | 2216.119 | 2391.851 |
| 16425 | LOC103222 | 42.94465 | 0.672047 | 0.423906 | 1.585368 | 0.112883 | 0.182708 | 31.9831  | 22.9913  | 45.22254 | 49.10679 | 47.06043 | 61.30375 |
| 22177 | ADIG      | 6.932759 | 0.671993 | 0.966599 | 0.695214 | 0.486921 | 0.583726 | 4.336691 | 7.116354 | 4.174388 | 13.39276 | 8.556443 | 4.019918 |
| 16228 | LOC119618 | 38.89856 | 0.671824 | 0.414307 | 1.621559 | 0.104898 | 0.171835 | 33.06727 | 29.56024 | 26.43779 | 55.80317 | 51.33866 | 37.18424 |
| 10764 | LOC119628 | 117.3886 | 0.671559 | 0.25093  | 2.67628  | 0.007444 | 0.018385 | 78.60252 | 95.24966 | 98.09812 | 127.2312 | 160.4333 | 144.717  |
| 3104  | LY6E      | 4064.142 | 0.671231 | 0.106992 | 6.273665 | 3.53E-10 | 3.02E-09 | 3239.508 | 2900.735 | 3269.937 | 5176.302 | 4457.907 | 5340.461 |
| 2771  | CYP2U1    | 1899.07  | 0.671202 | 0.099567 | 6.741189 | 1.57E-11 | 1.51E-10 | 1543.32  | 1450.094 | 1403.986 | 2312.484 | 2252.484 | 2432.05  |
| 27080 | LOC103235 | 0.348192 | 0.671062 | 4.040349 | 0.16609  | 0.868086 | NA       | 1.084173 | 0        | 0        | 0        | 0        | 1.004979 |
| 27500 | LOC119626 | 0.348192 | 0.671062 | 4.040349 | 0.16609  | 0.868086 | NA       | 1.084173 | 0        | 0        | 0        | 0        | 1.004979 |
| 27885 | LOC119627 | 0.348192 | 0.671062 | 4.040349 | 0.16609  | 0.868086 | NA       | 1.084173 | 0        | 0        | 0        | 0        | 1.004979 |
| 27959 | LOC119628 | 0.348192 | 0.671062 | 4.040349 | 0.16609  | 0.868086 | NA       | 1.084173 | 0        | 0        | 0        | 0        | 1.004979 |
| 3318  | GNPTAB    | 3432.754 | 0.670838 | 0.111336 | 6.025347 | 1.69E-09 | 1.35E-08 | 2507.692 | 2981.752 | 2459.41  | 4176.31  | 3968.05  | 4503.313 |
| 4050  | ASB8      | 887.4383 | 0.670769 | 0.125775 | 5.333089 | 9.66E-08 | 6.34E-07 | 739.9479 | 624.5969 | 692.2527 | 1015.618 | 1099.503 | 1152.711 |
| 19688 | MMP21     | 18.30844 | 0.670748 | 0.625889 | 1.071674 | 0.283867 | 0.383309 | 13.01007 | 17.51718 | 11.82743 | 11.16063 | 34.22577 | 22.10955 |
| 16448 | LOC103224 | 51.56708 | 0.670413 | 0.424303 | 1.580034 | 0.114099 | 0.184408 | 35.23561 | 44.34036 | 39.65669 | 33.4819  | 98.39909 | 58.28881 |
| 4046  | CUNH8orf5 | 831.3105 | 0.670385 | 0.125585 | 5.338079 | 9.39E-08 | 6.17E-07 | 668.9346 | 608.7219 | 651.2046 | 964.2789 | 971.1562 | 1123.567 |
| 24084 | DEFB113   | 2.341896 | 0.670263 | 1.706748 | 0.392714 | 0.694531 | 0.766678 | 2.710432 | 0.547412 | 2.087194 | 6.696381 | 0        | 2.009959 |
| 18396 | MEGF11    | 33.49799 | 0.670055 | 0.52959  | 1.265234 | 0.205788 | 0.297394 | 33.60935 | 12.04306 | 31.30791 | 42.41041 | 53.47777 | 28.13943 |
| 20880 | LOC103234 | 11.21922 | 0.669959 | 0.750365 | 0.892845 | 0.37194  | 0.473565 | 6.505036 | 8.211177 | 11.1317  | 11.16063 | 19.252   | 11.05477 |
| 21889 | LOC103246 | 13.2664  | 0.669824 | 0.897628 | 0.746216 | 0.455537 | 0.553267 | 8.131296 | 11.49565 | 10.43597 | 11.16063 | 36.36488 | 2.009959 |
| 2800  | ILRUN     | 6454.373 | 0.669728 | 0.100022 | 6.695828 | 2.14E-11 | 2.04E-10 | 5202.403 | 4856.09  | 4895.862 | 7600.392 | 7379.932 | 8791.56  |
| 8285  | LOC119615 | 207.8524 | 0.669673 | 0.201862 | 3.317473 | 0.000908 | 0.002915 | 169.673  | 171.3399 | 141.2335 | 220.9806 | 269.5279 | 274.3594 |
| 3456  | ITFG1     | 4991.589 | 0.669637 | 0.113565 | 5.896518 | 3.71E-09 | 2.86E-08 | 3562.05  | 4477.829 | 3520.401 | 6051.296 | 6139.248 | 6198.713 |
| 23832 | LOC119627 | 2.315861 | 0.669366 | 1.545873 | 0.433002 | 0.665013 | 0.741833 | 1.626259 | 1.094824 | 2.782925 | 2.232127 | 2.139111 | 4.019918 |
| 13969 | TRNAH-GU  | 94.98097 | 0.669133 | 0.331576 | 2.018041 | 0.043587 | 0.082952 | 84.02339 | 43.79295 | 92.53227 | 124.9991 | 106.9555 | 117.5826 |
| 17828 | LOC119624 | 27.34268 | 0.669108 | 0.487557 | 1.372368 | 0.169949 | 0.253427 | 27.10432 | 17.51718 | 18.78475 | 31.24978 | 34.22577 | 35.17428 |
| 18884 | LOC119620 | 21.07558 | 0.668984 | 0.554512 | 1.206437 | 0.227649 | 0.320486 | 18.97302 | 16.96977 | 12.52316 | 33.4819  | 21.39111 | 23.11453 |
| 7908  | SLC26A11  | 196.6435 | 0.668901 | 0.194713 | 3.435324 | 0.000592 | 0.00199  | 162.0838 | 138.4952 | 155.1481 | 247.7661 | 233.1631 | 243.205  |
| 24039 | HOXD1     | 2.272443 | 0.668754 | 1.667995 | 0.400933 | 0.68847  | 0.761386 | 1.626259 | 2.189647 | 1.391463 | 0        | 6.417332 | 2.009959 |
| 12433 | TEKT2     | 84.36428 | 0.668729 | 0.288842 | 2.315206 | 0.020602 | 0.044052 | 74.80792 | 63.49977 | 56.35424 | 102.6778 | 113.3729 | 95.47305 |
| 2498  | DHRS7     | 2357.767 | 0.668728 | 0.093718 | 7.135503 | 9.64E-13 | 1.03E-11 | 1908.144 | 1782.92  | 1772.028 | 2805.784 | 2956.251 | 2921.475 |
| 5263  | BAK1      | 1851.986 | 0.668657 | 0.147095 | 4.54576  | 5.47E-06 | 2.76E-05 | 1595.902 | 1119.457 | 1578.614 | 2249.984 | 2102.746 | 2465.215 |
| 23801 | LOC119625 | 2.568203 | 0.668388 | 1.531748 | 0.436356 | 0.662578 | 0.74008  | 1.626259 | 2.737059 | 1.391463 | 2.232127 | 6.417332 | 1.004979 |
| 2810  | RIT1      | 1393.656 | 0.668019 | 0.09993  | 6.684898 | 2.31E-11 | 2.19E-10 | 1102.604 | 1066.358 | 1062.382 | 1703.113 | 1672.785 | 1754.694 |
| 23164 | REG4      | 4.074133 | 0.667806 | 1.24782  | 0.535179 | 0.592526 | 0.680034 | 2.168345 | 2.189647 | 4.87012  | 8.928508 | 4.278221 | 2.009959 |
| 5120  | NFAT5     | 3065.549 | 0.667749 | 0.144576 | 4.618682 | 3.86E-06 | 2.01E-05 | 2096.79  | 2972.994 | 2036.406 | 3620.51  | 3722.053 | 3944.544 |
| 12212 | LOC119627 | 86.07774 | 0.667378 | 0.282208 | 2.364844 | 0.018038 | 0.039267 | 69.92741 | 61.31012 | 68.87741 | 89.28508 | 115.512  | 111.5527 |
| 11251 | LRFN3     | 122.718  | 0.667305 | 0.259626 | 2.570252 | 0.010162 | 0.024014 | 98.65972 | 110.5772 | 75.83472 | 151.7846 | 132.6249 | 166.8266 |
| 24033 | LOC119625 | 2.342784 | 0.667232 | 1.66142  | 0.401604 | 0.687976 | 0.76103  | 2.168345 | 1.094824 | 2.087194 | 6.696381 | 0        | 2.009959 |
| 22733 | LOC103226 | 4.9101   | 0.666966 | 1.104645 | 0.603783 | 0.545988 | 0.638503 | 4.336691 | 3.284471 | 3.478657 | 8.928508 | 6.417332 | 3.014938 |
| 22664 | LOC103226 | 5.161658 | 0.666893 | 1.088814 | 0.612495 | 0.54021  | 0.633669 | 4.878777 | 2.737059 | 4.174388 | 4.464254 | 10.69555 | 4.019918 |
| 7411  | TBX15     | 320.4393 | 0.66662  | 0.185385 | 3.595871 | 0.000323 | 0.00116  | 215.7504 | 297.792  | 228.1999 | 421.872  | 387.179  | 371.8424 |
| 11341 | LOC103217 | 448.0391 | 0.666342 | 0.261527 | 2.547887 | 0.010838 | 0.025405 | 495.4669 | 207.4691 | 334.6468 | 537.9426 | 652.4288 | 460.2806 |
| 24490 | LOC119627 | 1.428477 | 0.666113 | 2.004029 | 0.332387 | 0.739597 | 0.802833 | 1.626259 | 1.094824 | 0.695731 | 0        | 2.139111 | 3.014938 |
| 16819 | DOC2B     | 44.70932 | 0.66606  | 0.437567 | 1.522191 | 0.127961 | 0.202262 | 24.93597 | 33.93953 | 43.83108 | 75.89232 | 53.47777 | 36.17926 |
| 4321  | ATP6VOC   | 3606.878 | 0.665855 | 0.129502 | 5.141676 | 2.72E-07 | 1.68E-06 | 2448.604 | 3363.298 | 2554.726 | 4560.235 | 4248.274 | 4466.129 |
| 2979  | SPEG      | 1804.71  | 0.665731 | 0.103186 | 6.451734 | 1.11E-10 | 9.87E-10 | 1402.92  | 1361.961 | 1426.945 | 2124.985 | 2115.58  | 2395.871 |
| 13071 | LOC103225 | 98.84484 | 0.665591 | 0.303561 | 2.192612 | 0.028335 | 0.057627 | 74.80792 | 73.90059 | 80.70484 | 80.35657 | 164.7115 | 118.5876 |
| 3296  | LIPG      | 2020.447 | 0.665323 | 0.110057 | 6.045247 | 1.49E-09 | 1.20E-08 | 1602.949 | 1672.891 | 1414.422 | 2339.269 | 2462.116 | 2631.036 |
| 6022  | LOC119624 | 371.5912 | 0.665104 | 0.160106 | 4.154153 | 3.26E-05 | 0.000144 | 302.4842 | 301.6239 | 258.1163 | 415.1756 | 489.8563 | 462.2906 |
| 27078 | LOC103235 | 0.34908  | 0.664971 | 4.039763 | 0.164606 | 0.869254 | NA       | 0.542086 | 0.547412 | 0        | 0        | 0        | 1.004979 |
| 27289 | LOC119625 | 0.34908  | 0.664971 | 4.039763 | 0.164606 | 0.869254 | NA       | 0.542086 | 0.547412 | 0        | 0        | 0        | 1.004979 |
| 27970 | LOC119625 | 0.34908  | 0.664971 | 4.039763 | 0.164606 | 0.869254 | NA       | 0.542086 | 0.547412 | 0        | 0        | 0        | 1.004979 |
| 28640 | LOC119620 | 0.34908  | 0.664971 | 4.039763 | 0.164606 | 0.869254 | NA       | 0.542086 | 0.547412 | 0        | 0        | 0        | 1.004979 |
| 28711 | LOC119620 | 0.34908  | 0.664971 | 4.039763 | 0.164606 | 0.869254 | NA       | 0.542086 | 0.547412 | 0        | 0        | 0        | 1.004979 |
| 29046 | LOC119627 | 0.34908  | 0.664971 | 4.039763 | 0.164606 | 0.869254 | NA       | 0.542086 | 0.547412 | 0        | 0        | 0        | 1.004979 |
| 21917 | LOC119618 | 10.4285  | 0.664762 | 0.896303 | 0.741671 | 0.458287 | 0.555895 | 2.168345 | 12.59047 | 9.044508 | 15.62489 | 17.11289 | 6.029877 |
| 3498  | LMBRD1    | 1118.963 | 0.664515 | 0.113525 | 5.853486 | 4.81E-09 | 3.66E-08 | 862.4594 | 927      |          |          |          |          |



|       |           |          |          |          |          |          |            |          |          |          |          |          |          |
|-------|-----------|----------|----------|----------|----------|----------|------------|----------|----------|----------|----------|----------|----------|
| 6188  | THNSL1    | 378.7471 | 0.663947 | 0.162719 | 4.080326 | 4.50E-05 | 0.000193   | 291.6425 | 331.7316 | 255.3334 | 464.2824 | 464.187  | 465.3055 |
| 21232 | LOC103237 | 10.07719 | 0.663753 | 0.784265 | 0.846338 | 0.397364 | 0.497547   | 5.96295  | 7.663765 | 9.740239 | 8.928508 | 17.11289 | 11.05477 |
| 19723 | LOC119627 | 15.30562 | 0.663733 | 0.623122 | 1.065173 | 0.286798 | 0.38658    | 10.84173 | 12.04306 | 12.52316 | 20.08914 | 19.252   | 17.08465 |
| 24755 | LOC103214 | 1.43559  | 0.66371  | 2.297215 | 0.288919 | 0.772643 | 0.82975    | 0        | 0.547412 | 2.782925 | 0        | 4.278221 | 1.004979 |
| 21183 | LOC119618 | 10.11083 | 0.663666 | 0.77824  | 0.852779 | 0.393782 | 0.494203   | 9.215468 | 5.474118 | 9.044508 | 11.16063 | 10.69555 | 15.07469 |
| 6183  | MIEF2     | 773.4831 | 0.663665 | 0.162524 | 4.083486 | 4.44E-05 | 0.000191   | 662.4295 | 486.1017 | 650.5088 | 968.7431 | 812.8621 | 1060.253 |
| 24192 | LOC119624 | 2.855902 | 0.66366  | 1.767524 | 0.375474 | 0.707308 | 0.777272   | 2.710432 | 1.642235 | 2.087194 | 0        | 10.69555 | 0        |
| 21873 | LOC119620 | 8.108374 | 0.663558 | 0.886062 | 0.748885 | 0.453927 | 0.551689   | 7.047123 | 3.831883 | 7.653045 | 13.39276 | 10.69555 | 6.029877 |
| 19572 | LOC103247 | 18.88763 | 0.663383 | 0.609579 | 1.088264 | 0.276479 | 0.375546   | 10.84173 | 15.87494 | 16.69755 | 35.71403 | 17.11289 | 17.08465 |
| 18079 | ZNF883    | 27.48515 | 0.663203 | 0.499948 | 1.326544 | 0.18466  | 0.27154    | 20.0572  | 24.08612 | 18.78475 | 44.64254 | 34.22577 | 23.11453 |
| 16461 | NEBL      | 43.36404 | 0.663181 | 0.420099 | 1.578632 | 0.114421 | 0.184796   | 26.02015 | 43.79295 | 29.91645 | 62.49956 | 57.75599 | 40.19918 |
| 3668  | CHFR      | 1239.723 | 0.662842 | 0.116656 | 5.682005 | 1.33E-08 | 9.65E-08   | 997.4389 | 957.4233 | 929.4971 | 1415.169 | 1452.456 | 1686.356 |
| 5660  | LOC103237 | 469.2488 | 0.662792 | 0.152651 | 4.341887 | 1.41E-05 | 6.64E-05   | 365.9083 | 377.1667 | 348.5614 | 616.067  | 487.7172 | 620.0723 |
| 18345 | CACNA2D3  | 32.69703 | 0.66211  | 0.519463 | 1.274606 | 0.202449 | 0.293383   | 24.93597 | 18.06459 | 32.00364 | 40.17829 | 59.8951  | 21.10457 |
| 19320 | LOC103220 | 34.96121 | 0.662099 | 0.585105 | 1.131592 | 0.257806 | 0.35475    | 27.6464  | 30.10765 | 22.2634  | 31.24978 | 83.42532 | 15.07469 |
| 23243 | LOC119627 | 4.060406 | 0.662078 | 1.266299 | 0.522845 | 0.601082 | 0.687503   | 1.084173 | 3.284471 | 4.87012  | 6.696381 | 6.417332 | 2.009959 |
| 3861  | KANK1     | 1343.182 | 0.662005 | 0.120683 | 5.4855   | 4.12E-08 | 2.84E-07   | 1010.449 | 1124.931 | 988.6343 | 1680.792 | 1467.43  | 1786.853 |
| 6445  | VAMP2     | 418.0262 | 0.661809 | 0.167044 | 3.96188  | 7.44E-05 | 0.000307   | 280.2587 | 380.4512 | 310.9919 | 484.3716 | 530.4994 | 521.5843 |
| 19298 | SOWAHA    | 20.73504 | 0.661776 | 0.582718 | 1.135673 | 0.256094 | 0.352796   | 19.51511 | 10.94824 | 17.39328 | 20.08914 | 36.36488 | 20.09959 |
| 14866 | CUNH2orf1 | 51.31465 | 0.661628 | 0.355752 | 1.859801 | 0.062914 | 0.112509   | 40.11439 | 37.77142 | 41.74388 | 51.33892 | 70.59065 | 66.32864 |
| 13291 | LOC103238 | 86.27713 | 0.661142 | 0.307484 | 2.150164 | 0.031542 | 0.063092   | 72.63957 | 49.26706 | 79.31338 | 91.51721 | 113.3729 | 111.5527 |
| 2617  | SGPP1     | 2247.65  | 0.660844 | 0.094986 | 6.957269 | 3.47E-12 | 3.52E-11   | 1808.4   | 1727.084 | 1692.019 | 2738.82  | 2650.358 | 2869.216 |
| 3059  | KDM5B     | 2612.378 | 0.660822 | 0.104478 | 6.324989 | 2.53E-10 | 2.20E-09   | 2042.581 | 2165.561 | 1868.039 | 3071.407 | 3101.71  | 3424.97  |
| 3195  | HFE       | 1125.877 | 0.660607 | 0.107143 | 6.16568  | 7.02E-10 | 5.84E-09   | 868.9645 | 886.8071 | 862.0112 | 1439.722 | 1304.858 | 1392.902 |
| 8508  | TNFAIP8L1 | 199.0417 | 0.660576 | 0.202972 | 3.254512 | 0.001136 | 0.003549   | 146.3633 | 177.9088 | 137.7548 | 254.4625 | 239.5804 | 238.1801 |
| 15141 | CUNH2orf1 | 54.72511 | 0.660523 | 0.36546  | 1.807376 | 0.070704 | 0.124144   | 36.86187 | 35.03436 | 55.65851 | 71.42806 | 62.03421 | 67.33362 |
| 27014 | SUSD3     | 0.562821 | 0.660167 | 3.488086 | 0.189263 | 0.849886 | NA         | 0.542086 | 0        | 0.695731 | 0        | 2.139111 | 0        |
| 28229 | LOC119619 | 0.562821 | 0.660167 | 3.488086 | 0.189263 | 0.849886 | NA         | 0.542086 | 0        | 0.695731 | 0        | 2.139111 | 0        |
| 28636 | LOC119620 | 0.562821 | 0.660167 | 3.488086 | 0.189263 | 0.849886 | NA         | 0.542086 | 0        | 0.695731 | 0        | 2.139111 | 0        |
| 28778 | CYLC1     | 0.562821 | 0.660167 | 3.488086 | 0.189263 | 0.849886 | NA         | 0.542086 | 0        | 0.695731 | 0        | 2.139111 | 0        |
| 17545 | LOC103234 | 34.33512 | 0.659905 | 0.468323 | 1.409079 | 0.158812 | 0.240643   | 18.43094 | 25.72836 | 36.17803 | 31.24978 | 49.19955 | 45.22408 |
| 27612 | LOC119628 | 0.578324 | 0.659814 | 3.458037 | 0.190806 | 0.848678 | NA         | 0.542086 | 0        | 0.695731 | 2.232127 | 0        | 0        |
| 28815 | TRNAK-CU  | 0.578324 | 0.659814 | 3.458037 | 0.190806 | 0.848678 | NA         | 0.542086 | 0        | 0.695731 | 2.232127 | 0        | 0        |
| 4060  | LOC27A1   | 982.9911 | 0.659528 | 0.123843 | 5.325527 | 1.01E-07 | 6.59E-07   | 690.618  | 841.9194 | 754.8685 | 1147.313 | 1232.128 | 1231.1   |
| 23016 | LOC119629 | 4.052406 | 0.659242 | 1.178463 | 0.559408 | 0.575883 | 0.665183   | 3.252518 | 3.284471 | 2.782925 | 6.696381 | 4.278221 | 4.019918 |
| 8283  | LOC103237 | 192.0975 | 0.659074 | 0.198557 | 3.319327 | 0.000902 | 0.002896   | 159.9155 | 133.5685 | 153.7566 | 225.4448 | 241.7195 | 238.1801 |
| 27269 | LOC119629 | 0.349967 | 0.658899 | 4.039181 | 0.163127 | 0.870419 | NA         | 0        | 1.094824 | 0        | 0        | 0        | 1.004979 |
| 28501 | LOC119620 | 0.349967 | 0.658899 | 4.039181 | 0.163127 | 0.870419 | NA         | 0        | 1.094824 | 0        | 0        | 0        | 1.004979 |
| 3241  | LOC103247 | 1979.723 | 0.658511 | 0.107654 | 6.11691  | 9.54E-10 | 7.83E-09   | 1582.35  | 1398.09  | 1629.403 | 2441.947 | 2290.988 | 2535.563 |
| 20053 | LOC119619 | 15.9137  | 0.658103 | 0.64533  | 1.019792 | 0.307827 | 0.408077   | 11.9259  | 12.59047 | 11.82743 | 24.5534  | 23.53022 | 11.05477 |
| 7975  | LOC103224 | 239.2919 | 0.657944 | 0.192485 | 3.418162 | 0.00063  | 0.002102   | 170.7572 | 206.9217 | 178.803  | 261.1589 | 333.7013 | 284.4092 |
| 2517  | SERINC1   | 7361.623 | 0.657936 | 0.092661 | 7.100493 | 1.24E-12 | 1.31E-11   | 5759.668 | 5958.578 | 5420.443 | 8924.044 | 8477.296 | 9629.713 |
| 15157 | SPON2     | 55.06997 | 0.657857 | 0.3645   | 1.804819 | 0.071103 | 0.124713   | 50.41403 | 33.39212 | 43.83108 | 82.5887  | 59.8951  | 60.29877 |
| 23491 | TEX52     | 3.182404 | 0.657817 | 1.353819 | 0.485897 | 0.62704  | 0.709628   | 2.168345 | 2.737059 | 2.782925 | 2.232127 | 2.139111 | 7.034856 |
| 4386  | TBC1D20   | 779.7922 | 0.657552 | 0.129209 | 5.089075 | 3.60E-07 | 2.18E-06   | 604.4263 | 641.0192 | 573.2826 | 872.7616 | 939.0696 | 1048.194 |
| 21754 | LOC119627 | 8.989636 | 0.657432 | 0.856206 | 0.767843 | 0.442581 | 0.540866   | 8.131296 | 3.284471 | 9.740239 | 11.16063 | 8.556443 | 13.06473 |
| 7829  | LOC103239 | 216.6548 | 0.657044 | 0.189965 | 3.458773 | 0.000543 | 0.001843   | 179.9727 | 152.7279 | 172.5414 | 272.3195 | 245.9977 | 276.3694 |
| 4801  | CNNM3     | 1023.297 | 0.65688  | 0.136504 | 4.812167 | 1.49E-06 | 8.27E-06   | 860.2911 | 708.8983 | 818.1801 | 1216.509 | 1120.894 | 1415.011 |
| 3705  | ATAD2     | 9629.05  | 0.656655 | 0.116533 | 5.634919 | 1.75E-08 | 1.26E-07   | 6840.046 | 8811.141 | 6773.641 | 11582.51 | 11621.79 | 12145.18 |
| 18680 | LOC119629 | 22.59115 | 0.656494 | 0.533139 | 1.231374 | 0.218183 | 0.310514   | 19.51511 | 18.06459 | 15.30609 | 31.24978 | 19.252   | 32.15934 |
| 19227 | LOC103234 | 19.62526 | 0.65592  | 0.570458 | 1.149813 | 0.250221 | 0.345978   | 16.26259 | 13.6853  | 15.30609 | 22.32127 | 32.08666 | 18.08963 |
| 17669 | LOC119627 | 33.90456 | 0.655866 | 0.471412 | 1.39128  | 0.164141 | 0.246968   | 22.22554 | 19.15941 | 38.26523 | 40.17829 | 36.36488 | 47.23404 |
| 6333  | LOC103216 | 413.9613 | 0.655762 | 0.163464 | 4.011662 | 6.03E-05 | 0.000253   | 368.0766 | 295.6024 | 301.9474 | 453.1218 | 528.3603 | 536.659  |
| 10349 | LOC119620 | 130.903  | 0.655692 | 0.236141 | 2.776693 | 0.005492 | 0.014107   | 107.8752 | 92.5126  | 105.0554 | 174.1059 | 139.0422 | 166.8266 |
| 7611  | CFAP54    | 260.9583 | 0.655256 | 0.186013 | 3.522641 | 0.000427 | 0.001492   | 204.9086 | 215.1328 | 185.0645 | 350.4439 | 335.8404 | 274.3594 |
| 19145 | LOC103218 | 22.15574 | 0.65524  | 0.563905 | 1.161968 | 0.245248 | 0.340555   | 15.7205  | 17.51718 | 18.78475 | 13.39276 | 36.36488 | 31.15436 |
| 22133 | LOC103248 | 6.913278 | 0.655174 | 0.931483 | 0.703367 | 0.481827 | 0.578745   | 4.878777 | 5.474118 | 5.565851 | 6.696381 | 12.83466 | 6.029877 |
| 2860  | TATDN1    | 1801.219 | 0.655142 | 0.099275 | 6.599258 | 4.13E-11 | 3.84E-10   | 1424.061 | 1386.047 | 1383.114 | 2261.145 | 2286.709 | 2066.238 |
| 26613 | LOC119628 | 0.563709 | 0.654767 | 3.486361 | 0.187808 | 0.851027 | NA         | 0        | 0.547412 | 0.695731 | 0        | 2.139111 | 0        |
| 27370 | LOC103236 | 0.563709 | 0.654767 | 3.486361 | 0.187808 | 0.851027 | NA         | 0        | 0.547412 | 0.695731 | 0        | 2.139111 | 0        |
| 27415 | LOC119629 | 0.563709 | 0.654767 | 3.486361 | 0.187808 | 0.851027 | NA         | 0        | 0.547412 | 0.695731 | 0        | 2.139111 | 0        |
| 27884 | LOC119627 | 0.563709 | 0.654767 | 3.486361 | 0.187808 | 0.851027 | NA         | 0        | 0.547412 | 0.695731 | 0        | 2.139111 | 0        |
| 28195 | LOC103228 | 0.563709 | 0.654767 | 3.486361 | 0.187808 | 0.851027 | NA         | 0        | 0.547412 | 0.695731 | 0        | 2.139111 | 0        |
| 29088 | LOC103239 | 0.563709 | 0.654767 | 3.486361 | 0.187808 | 0.851027 | NA         | 0        | 0.547412 | 0.695731 | 0        | 2.139111 | 0        |
| 3099  | LAT       | 2862.855 | 0.654638 | 0.104219 | 6.281385 | 3.36E-10 | 2.88E-09   | 2101.669 | 2386.716 | 2188.771 | 3446.404 | 3272.839 | 3780.733 |
| 22222 | LOC119628 | 10.32767 | 0.654561 | 0.950994 | 0.688291 | 0.49127  | 0.587724   | 10.84173 | 2.737059 | 10.43597 | 2.232127 | 25.66933 | 10.04979 |
| 22697 | ACTL8     | 5.525555 | 0.65456  | 1.075633 | 0.608535 | 0.542833 | 0.63582    | 4.878777 | 1.642235 | 6.261582 | 8.928508 | 6.417332 | 5.024897 |
| 29081 | DEFB126   | 0.579212 | 0.65443  | 3.456386 | 0.189339 | 0.849827 | NA         | 0        | 0.547412 | 0.695731 | 2.232127 | 0        | 0        |
| 19063 | LOC119629 | 22.76826 | 0.65385  | 0.556473 | 1.17499  | 0.239999 | 0.334699   | 16.80468 | 15.87494 | 20.17621 | 17.85702 | 42.78221 | 23.11453 |
| 8378  | LOC103234 | 210.1893 | 0.653789 | 0.198707 | 3.290212 | 0.001001 | 0.003177   | 149.0738 | 187.7623 | 153.0609 | 243.3018 | 271.6671 | 256.2698 |
| 3784  | LOC103239 | 797.6446 | 0.653235 | 0.117523 | 5.558345 | 2.72E-08 | 1.91E-07   | 596.295  | 642.6615 | 622.6796 | 986.6001 | 932.6523 | 1004.979 |
| 17349 | LOC119629 | 36.83699 | 0.652696 | 0.453488 | 1.439279 | 0.150071 | 0.229954</ |          |          |          |          |          |          |



|       |           |          |          |          |          |          |          |          |          |          |          |          |          |
|-------|-----------|----------|----------|----------|----------|----------|----------|----------|----------|----------|----------|----------|----------|
| 20169 | LOC103211 | 18.41056 | 0.651861 | 0.651282 | 1.00089  | 0.31688  | 0.417684 | 11.9259  | 14.23271 | 16.69755 | 37.94616 | 8.556443 | 21.10457 |
| 24189 | LOC119620 | 2.310003 | 0.651709 | 1.733368 | 0.375978 | 0.706933 | 0.776957 | 3.252518 | 0        | 2.087194 | 2.232127 | 4.278221 | 2.009959 |
| 2911  | ATL3      | 8490.096 | 0.651202 | 0.09964  | 6.535551 | 6.34E-11 | 5.79E-10 | 6413.424 | 7275.103 | 6131.481 | 10332.52 | 9854.883 | 10933.17 |
| 9723  | LOC103224 | 152.0033 | 0.651072 | 0.222661 | 2.924054 | 0.003455 | 0.009447 | 109.5014 | 120.978  | 123.1445 | 180.8023 | 211.772  | 165.8216 |
| 14714 | LOC119620 | 59.85004 | 0.650947 | 0.344873 | 1.887498 | 0.059093 | 0.106769 | 48.78777 | 42.15071 | 48.00546 | 64.73168 | 94.12087 | 61.30375 |
| 3230  | ZFP90     | 2980.786 | 0.650871 | 0.10614  | 6.132201 | 8.67E-10 | 7.13E-09 | 2276.763 | 2581.594 | 2099.717 | 3631.671 | 3625.793 | 3669.18  |
| 19151 | SERPINA1C | 25.03228 | 0.650716 | 0.160383 | 1.160383 | 0.245893 | 0.341343 | 18.7302  | 18.612   | 20.87194 | 13.39276 | 49.19955 | 29.1444  |
| 18080 | ANKDD1A   | 29.17134 | 0.65051  | 0.490557 | 1.326065 | 0.184818 | 0.271758 | 26.02015 | 24.63353 | 16.69755 | 33.4819  | 47.06043 | 27.13445 |
| 24614 | LOC119620 | 1.439898 | 0.650496 | 2.069215 | 0.314368 | 0.753241 | 0.813558 | 2.168345 | 1.094824 | 0        | 2.232127 | 2.139111 | 1.004979 |
| 17376 | LOC119620 | 42.60162 | 0.650331 | 0.453333 | 1.434556 | 0.151414 | 0.23166  | 47.16151 | 18.06459 | 34.09084 | 53.57105 | 53.47777 | 49.24399 |
| 3238  | LOC103241 | 1654.364 | 0.650244 | 0.106197 | 6.123013 | 9.18E-10 | 7.54E-09 | 1222.405 | 1326.379 | 1314.932 | 2151.77  | 1869.583 | 2041.113 |
| 15053 | LOC119611 | 71.09963 | 0.650164 | 0.356512 | 1.823679 | 0.068201 | 0.120449 | 73.18166 | 37.224   | 55.65851 | 71.42806 | 102.6773 | 86.42823 |
| 23203 | LOC103211 | 4.063042 | 0.650138 | 1.227774 | 0.529526 | 0.596441 | 0.683376 | 4.336691 | 1.094824 | 4.174388 | 4.464254 | 4.278221 | 6.029877 |
| 24883 | LOC119621 | 1.162303 | 0.649726 | 2.414543 | 0.269089 | 0.787861 | 0.841751 | 0.542086 | 2.189647 | 0        | 2.232127 | 0        | 2.009959 |
| 14377 | AMIGO3    | 57.94752 | 0.649292 | 0.333244 | 1.948398 | 0.051367 | 0.094977 | 46.61943 | 39.96106 | 48.7012  | 69.19594 | 74.86887 | 68.3386  |
| 4433  | IP6K1     | 2659.946 | 0.649203 | 0.128374 | 5.057127 | 4.26E-07 | 2.55E-06 | 2388.433 | 1797.153 | 2032.231 | 3142.835 | 3018.285 | 3580.742 |
| 4215  | OSBPL5    | 1118.225 | 0.64916  | 0.124646 | 5.208037 | 1.91E-07 | 1.20E-06 | 909.6209 | 785.536  | 921.1483 | 1243.295 | 1375.448 | 1474.305 |
| 2198  | SAT2      | 3327.172 | 0.648966 | 0.085275 | 7.610292 | 2.73E-14 | 3.31E-13 | 2612.856 | 2538.349 | 2621.516 | 4066.935 | 4113.51  | 4009.868 |
| 21315 | LOC119621 | 13.14448 | 0.648464 | 0.78058  | 0.830747 | 0.406117 | 0.506526 | 9.215468 | 15.32753 | 5.565851 | 29.01765 | 10.69555 | 9.044815 |
| 16511 | CCDC116   | 46.25826 | 0.648451 | 0.412135 | 1.573395 | 0.115627 | 0.186176 | 36.31979 | 29.56024 | 41.74388 | 42.41041 | 81.28621 | 46.22906 |
| 19395 | LOC103211 | 26.92333 | 0.647892 | 0.579353 | 1.118302 | 0.263438 | 0.361082 | 10.29964 | 33.39212 | 18.78475 | 29.01765 | 44.92132 | 25.12449 |
| 3603  | ELOVL5    | 11576.31 | 0.647515 | 0.11291  | 5.734768 | 9.76E-09 | 7.20E-08 | 8122.08  | 10536.58 | 8405.131 | 13843.65 | 14197.28 | 14353.12 |
| 22922 | LOC119621 | 4.64261  | 0.647359 | 1.12406  | 0.575912 | 0.564675 | 0.654912 | 2.168345 | 4.379295 | 4.174388 | 6.696381 | 6.417332 | 4.019918 |
| 22392 | LOC103231 | 6.082508 | 0.64721  | 0.981771 | 0.659227 | 0.50975  | 0.605203 | 4.336691 | 5.474118 | 4.174388 | 8.928508 | 8.556443 | 5.024897 |
| 7379  | MSRB1     | 1747.761 | 0.647034 | 0.17933  | 3.608065 | 0.000308 | 0.001112 | 1631.138 | 945.9276 | 1512.52  | 2040.164 | 1967.982 | 2388.836 |
| 20144 | COLGALT2  | 16.16226 | 0.646797 | 0.643966 | 1.004396 | 0.315188 | 0.415968 | 9.757555 | 14.23271 | 13.91463 | 11.16063 | 27.80844 | 20.09959 |
| 9764  | ACADS     | 766.7275 | 0.646638 | 0.221972 | 2.913152 | 0.003578 | 0.009742 | 742.1162 | 371.1452 | 681.8167 | 957.5825 | 791.4709 | 1056.233 |
| 22635 | LOC119621 | 6.6685   | 0.646267 | 1.045209 | 0.618314 | 0.536369 | 0.629969 | 8.673382 | 4.379295 | 2.087194 | 11.16063 | 10.69555 | 3.014938 |
| 21532 | LOC119621 | 8.964182 | 0.646255 | 0.807965 | 0.799855 | 0.423795 | 0.523241 | 7.589209 | 7.116354 | 6.261582 | 8.928508 | 12.83466 | 11.05477 |
| 3289  | LRRK2     | 2018.447 | 0.645712 | 0.106702 | 6.051557 | 1.43E-09 | 1.16E-08 | 1596.444 | 1646.067 | 1482.604 | 2243.288 | 2543.403 | 2598.877 |
| 7532  | CSDC2     | 598.6889 | 0.645479 | 0.1819   | 3.548544 | 0.000387 | 0.001367 | 529.6184 | 373.3349 | 500.9266 | 756.691  | 590.3945 | 841.1678 |
| 4324  | CHCHD10   | 1876.072 | 0.6454   | 0.125669 | 5.135697 | 2.81E-07 | 1.73E-06 | 1542.236 | 1322.547 | 1531.305 | 2147.306 | 2092.05  | 2620.986 |
| 4217  | ZNF34     | 704.3765 | 0.64533  | 0.123935 | 5.20702  | 1.92E-07 | 1.21E-06 | 546.9651 | 543.0325 | 561.4552 | 841.5119 | 810.7229 | 922.5712 |
| 8524  | LOC103231 | 214.5461 | 0.645292 | 0.198644 | 3.248477 | 0.00116  | 0.003619 | 146.9054 | 166.9606 | 187.1517 | 267.8552 | 280.2235 | 238.1801 |
| 3334  | BCAR1     | 3318.229 | 0.645075 | 0.10736  | 6.008516 | 1.87E-09 | 1.49E-08 | 2723.442 | 2370.293 | 2675.087 | 4194.167 | 3662.157 | 4284.227 |
| 4146  | TTI2      | 784.334  | 0.64503  | 0.12262  | 5.2604   | 1.44E-07 | 9.22E-07 | 622.8572 | 626.2391 | 589.2845 | 948.654  | 889.87   | 1029.099 |
| 4340  | RAB27B    | 1883.136 | 0.644314 | 0.125688 | 5.126294 | 2.96E-07 | 1.81E-06 | 1310.765 | 1724.347 | 1372.678 | 2263.377 | 2342.326 | 2285.323 |
| 22988 | TRNAE-CU  | 5.276763 | 0.643686 | 1.137453 | 0.565902 | 0.571461 | 0.660879 | 2.710432 | 2.189647 | 7.653045 | 8.928508 | 2.139111 | 8.039836 |
| 12107 | IRX5      | 105.6741 | 0.643438 | 0.269797 | 2.384898 | 0.017084 | 0.037513 | 76.97626 | 99.62895 | 70.26887 | 140.624  | 121.9293 | 124.6175 |
| 2827  | UBE2E1    | 2846.088 | 0.643367 | 0.096677 | 6.654821 | 2.84E-11 | 2.67E-10 | 2217.675 | 2337.996 | 2108.762 | 3308.012 | 3660.018 | 3444.065 |
| 5395  | LOC103231 | 1383.075 | 0.643004 | 0.144018 | 4.464761 | 8.02E-06 | 3.95E-05 | 1209.395 | 899.3976 | 1134.738 | 1665.167 | 1497.377 | 1892.376 |
| 2584  | ATP6V0E1  | 5715.118 | 0.642866 | 0.091758 | 7.006068 | 2.45E-12 | 2.52E-11 | 4610.445 | 4102.304 | 4676.011 | 6993.254 | 6870.823 | 7037.871 |
| 16538 | LGI4      | 40.71991 | 0.642716 | 0.409749 | 1.568558 | 0.116751 | 0.187678 | 28.73058 | 29.01283 | 36.87376 | 58.0353  | 53.47777 | 38.18922 |
| 23409 | LOC103211 | 4.05554  | 0.642703 | 1.291864 | 0.497501 | 0.618836 | 0.702796 | 2.168345 | 1.094824 | 6.261582 | 2.232127 | 8.556443 | 4.019918 |
| 16789 | PCYT1B    | 57.49288 | 0.6427   | 0.420737 | 1.527559 | 0.126622 | 0.200507 | 33.60935 | 44.34036 | 55.65851 | 58.0353  | 109.0946 | 44.2191  |
| 17693 | FER1L6    | 45.96664 | 0.642578 | 0.463594 | 1.386079 | 0.165723 | 0.24901  | 45.53526 | 30.65506 | 29.91645 | 60.26743 | 81.28621 | 28.13943 |
| 3513  | EDEM3     | 5107.663 | 0.642521 | 0.109925 | 5.84509  | 5.06E-09 | 3.83E-08 | 3731.723 | 4516.695 | 3720.076 | 6241.027 | 5839.772 | 6596.685 |
| 19160 | GPHA2     | 24.12819 | 0.642242 | 0.554231 | 1.158798 | 0.246539 | 0.342079 | 21.14137 | 13.6853  | 20.87194 | 33.4819  | 38.50399 | 17.08465 |
| 3381  | MTMR10    | 2759.228 | 0.642237 | 0.107788 | 5.95832  | 2.55E-09 | 2.00E-08 | 2054.507 | 2399.853 | 2012.751 | 3209.799 | 3351.986 | 3526.473 |
| 21780 | LOC119621 | 8.999667 | 0.642138 | 0.841806 | 0.76281  | 0.445577 | 0.543877 | 10.29964 | 3.831883 | 6.957314 | 11.16063 | 10.69555 | 11.05477 |
| 20316 | LOC119621 | 16.57894 | 0.642007 | 0.658196 | 0.975404 | 0.32936  | 0.430992 | 7.589209 | 17.51718 | 13.2189  | 24.5534  | 23.53022 | 13.06473 |
| 4385  | SCARB1    | 1334.665 | 0.64197  | 0.126108 | 5.090655 | 3.57E-07 | 2.16E-06 | 1135.671 | 948.1173 | 1048.467 | 1562.489 | 1495.238 | 1818.008 |
| 9429  | SWSAP1    | 209.4574 | 0.641886 | 0.213877 | 3.001192 | 0.002689 | 0.007582 | 153.9525 | 162.5813 | 175.3243 | 296.8729 | 194.6591 | 273.3544 |
| 22074 | LOC119621 | 9.236263 | 0.641498 | 0.899027 | 0.713547 | 0.475507 | 0.572681 | 5.96295  | 12.59047 | 2.782925 | 8.928508 | 17.11289 | 8.039836 |
| 2767  | TRIM8     | 4800.455 | 0.641461 | 0.095094 | 6.745578 | 1.52E-11 | 1.46E-10 | 3624.932 | 3928.775 | 3702.682 | 5792.37  | 5471.845 | 6282.127 |
| 3875  | ENPP5     | 1657.416 | 0.641336 | 0.117188 | 5.472715 | 4.43E-08 | 3.04E-07 | 1207.226 | 1438.051 | 1236.315 | 2002.218 | 2173.336 | 1887.351 |
| 24729 | LOC119621 | 1.759264 | 0.640982 | 2.177236 | 0.294402 | 0.768451 | 0.826126 | 0        | 0        | 4.174388 | 2.232127 | 2.139111 | 2.009959 |
| 17405 | LOC103241 | 34.0083  | 0.640955 | 0.448617 | 1.428735 | 0.15308  | 0.23382  | 27.6464  | 29.56024 | 21.56767 | 51.33892 | 42.78221 | 31.15436 |
| 9994  | LOC103241 | 163.4456 | 0.640756 | 0.223806 | 2.862992 | 0.004197 | 0.011163 | 108.9594 | 140.6848 | 132.189  | 218.7484 | 203.2155 | 176.8764 |
| 21667 | GPR1      | 8.960987 | 0.640729 | 0.820443 | 0.780956 | 0.434829 | 0.533526 | 7.589209 | 7.663765 | 5.565851 | 8.928508 | 14.97377 | 9.044815 |
| 12738 | LOC103211 | 179.615  | 0.640472 | 0.284557 | 2.250769 | 0.0244   | 0.050927 | 174.5518 | 104.0082 | 141.9292 | 158.481  | 303.7537 | 194.966  |
| 5332  | PPIC      | 996.3676 | 0.640317 | 0.142231 | 4.501946 | 6.73E-06 | 3.36E-05 | 892.2742 | 639.9244 | 804.2655 | 1218.741 | 1215.015 | 1207.985 |
| 2570  | SDC4      | 5252.933 | 0.640184 | 0.091162 | 7.022485 | 2.18E-12 | 2.25E-11 | 3968.614 | 4155.403 | 4200.13  | 6312.455 | 6045.127 | 6835.87  |
| 22705 | LOC103221 | 6.391923 | 0.640141 | 1.052712 | 0.608088 | 0.543129 | 0.635943 | 1.626259 | 8.211177 | 4.87012  | 8.928508 | 10.69555 | 4.019918 |
| 23669 | LOC119611 | 2.909485 | 0.639687 | 1.393003 | 0.459214 | 0.64608  | 0.725677 | 3.252518 | 2.189647 | 1.391463 | 4.464254 | 2.139111 | 4.019918 |
| 20158 | LOC119611 | 15.11759 | 0.639683 | 0.638451 | 1.00193  | 0.316377 | 0.417234 | 10.29964 | 10.94824 | 14.61036 | 15.62489 | 17.11289 | 22.10955 |
| 3219  | RNF103    | 1630.503 | 0.639627 | 0.104168 | 6.140343 | 8.23E-10 | 6.80E-09 | 1245.714 | 1370.719 | 1209.181 | 1937.486 | 1980.816 | 2039.103 |
| 3424  | LRRRC8D   | 3978.474 | 0.639509 | 0.108005 | 5.921081 | 3.20E-09 | 2.48E-08 | 2913.714 | 3531.901 | 2887.285 | 4723.181 | 4879.311 | 4935.454 |
| 2766  | PHKB      | 3746.67  | 0.639478 | 0.094779 | 6.74703  | 1.51E-11 | 1.45E-10 | 2871.431 | 3118.058 | 2802.406 | 4522.289 | 4368.064 | 4797.772 |
| 12307 | LOC119621 | 125.0401 |          |          |          |          |          |          |          |          |          |          |          |



|       |           |          |          |          |          |            |          |          |          |          |          |          |          |
|-------|-----------|----------|----------|----------|----------|------------|----------|----------|----------|----------|----------|----------|----------|
| 7591  | LOC119620 | 259.5605 | 0.638301 | 0.180876 | 3.528936 | 0.000417   | 0.001461 | 210.3295 | 211.301  | 188.5432 | 274.5516 | 337.9795 | 334.6582 |
| 3989  | GRAMD1B   | 809.2581 | 0.637299 | 0.118419 | 5.381718 | 7.38E-08   | 4.92E-07 | 659.7191 | 621.8598 | 619.8967 | 924.1006 | 1013.938 | 1016.034 |
| 6273  | HDHD3     | 474.1947 | 0.636915 | 0.157604 | 4.041223 | 5.32E-05   | 0.000225 | 351.272  | 356.9125 | 408.3943 | 600.4422 | 491.9955 | 636.152  |
| 5017  | GRAMD4    | 1952.699 | 0.63688  | 0.136127 | 4.678572 | 2.89E-06   | 1.53E-05 | 1665.831 | 1343.896 | 1580.702 | 2408.465 | 2012.903 | 2704.4   |
| 3522  | IPO13     | 2132.188 | 0.63684  | 0.109094 | 5.837553 | 5.30E-09   | 4.00E-08 | 1703.235 | 1640.593 | 1669.06  | 2566.946 | 2338.048 | 2875.246 |
| 22443 | LOC119620 | 6.662404 | 0.636751 | 0.979494 | 0.650082 | 0.515639   | 0.610804 | 4.878777 | 7.663765 | 2.782925 | 8.928508 | 10.69555 | 5.024897 |
| 17296 | LOC103224 | 37.54763 | 0.636744 | 0.439429 | 1.449025 | 0.147331   | 0.226456 | 29.81475 | 27.918   | 29.22072 | 53.57105 | 65.61688 | 29.1444  |
| 16537 | NDUF57    | 714.3977 | 0.636656 | 0.405865 | 1.568638 | 0.116732   | 0.18766  | 690.618  | 286.2964 | 701.2972 | 917.4042 | 772.219  | 918.5512 |
| 7370  | LOC103217 | 269.8931 | 0.636596 | 0.176369 | 3.609459 | 0.000307   | 0.001107 | 196.2353 | 235.3871 | 203.1536 | 314.7299 | 325.1448 | 344.708  |
| 10204 | LOC119620 | 201.3325 | 0.636283 | 0.225979 | 2.815671 | 0.004868   | 0.012682 | 147.9896 | 191.0467 | 132.189  | 229.9091 | 288.7799 | 218.0805 |
| 14452 | LOC119620 | 123.5661 | 0.636146 | 0.328921 | 1.934037 | 0.053109   | 0.097695 | 119.8011 | 70.06871 | 98.09812 | 165.1774 | 196.7982 | 91.45313 |
| 9759  | SERTAD1   | 888.2102 | 0.636029 | 0.218265 | 2.914019 | 0.003568   | 0.00972  | 860.2911 | 414.9382 | 811.9185 | 1102.671 | 1046.025 | 1093.418 |
| 22959 | LOC119620 | 6.153013 | 0.635948 | 1.116145 | 0.569772 | 0.568832   | 0.658645 | 6.505036 | 3.284471 | 4.174388 | 13.39276 | 8.556443 | 1.004979 |
| 12173 | LOC119620 | 109.4703 | 0.635872 | 0.26815  | 2.371326 | 0.017724   | 0.038711 | 101.9122 | 80.46954 | 73.74753 | 154.0168 | 124.0684 | 122.6075 |
| 14172 | LOC103240 | 65.85642 | 0.635642 | 0.320699 | 1.98205  | 0.047474   | 0.089068 | 49.32986 | 50.9093  | 53.57132 | 95.98146 | 77.00798 | 68.3386  |
| 19217 | LOC103230 | 25.44066 | 0.635616 | 0.552159 | 1.151148 | 0.249672   | 0.34538  | 23.8518  | 11.49565 | 24.3506  | 42.41041 | 21.39111 | 29.1444  |
| 2380  | ARMC8     | 3066.118 | 0.635579 | 0.087035 | 7.302561 | 2.82E-13   | 3.15E-12 | 2452.941 | 2398.211 | 2354.355 | 3741.045 | 3649.323 | 3800.832 |
| 3711  | FUT11     | 1657.289 | 0.635386 | 0.112795 | 5.633124 | 1.77E-08   | 1.27E-07 | 1288.539 | 1354.844 | 1255.099 | 2037.932 | 1805.409 | 2201.91  |
| 18783 | GRAMD2A   | 36.76758 | 0.635365 | 0.520625 | 1.220389 | 0.222317   | 0.314663 | 33.60935 | 14.78012 | 38.26523 | 24.5534  | 64.17332 | 45.22408 |
| 3200  | DENND4C   | 6547.947 | 0.635348 | 0.103126 | 6.160916 | 7.23E-10   | 6.01E-09 | 4865.225 | 5728.665 | 4795.676 | 7761.106 | 7724.329 | 8412.683 |
| 11246 | TMEM1850  | 171.8587 | 0.635035 | 0.246979 | 2.571206 | 0.010134   | 0.023957 | 173.4676 | 105.1031 | 125.9274 | 187.4987 | 216.0502 | 223.1054 |
| 3260  | KPNA4     | 8331.508 | 0.634978 | 0.104317 | 6.086976 | 1.15E-09   | 9.38E-09 | 6129.371 | 7409.219 | 6043.123 | 10037.88 | 9996.064 | 10373.4  |
| 4149  | ZNF438    | 971.2143 | 0.634728 | 0.120715 | 5.258063 | 1.46E-07   | 9.33E-07 | 718.8065 | 822.2125 | 738.8667 | 1185.259 | 1255.658 | 1106.482 |
| 18436 | LOC119620 | 28.26325 | 0.634057 | 0.503642 | 1.258943 | 0.208051   | 0.300013 | 26.02015 | 14.23271 | 25.74206 | 37.94616 | 38.50399 | 27.13445 |
| 22691 | LOC103240 | 6.14797  | 0.633687 | 1.039541 | 0.609584 | 0.542138   | 0.63522  | 3.252518 | 7.116354 | 4.174388 | 11.16063 | 2.139111 | 9.044815 |
| 23727 | TRNAV-CA  | 2.893095 | 0.633264 | 1.40899  | 0.449446 | 0.65311    | 0.731741 | 3.794605 | 1.642235 | 1.391463 | 2.232127 | 4.278221 | 4.019918 |
| 23857 | LOC119620 | 2.620838 | 0.632705 | 1.474719 | 0.429034 | 0.667898   | 0.74423  | 1.626259 | 1.094824 | 3.478657 | 2.232127 | 4.278221 | 3.014938 |
| 21256 | LOC119620 | 12.77735 | 0.63256  | 0.751755 | 0.841443 | 0.4001     | 0.500407 | 14.09425 | 4.379295 | 11.82743 | 11.16063 | 17.11289 | 18.08963 |
| 4653  | FBXO33    | 654.5991 | 0.632355 | 0.128642 | 4.915636 | 8.85E-07   | 5.06E-06 | 526.908  | 524.9679 | 489.0992 | 729.9055 | 840.6705 | 816.0433 |
| 19631 | LOC103220 | 20.37698 | 0.63233  | 0.585482 | 1.080016 | 0.280135   | 0.379369 | 14.63633 | 12.59047 | 20.17621 | 24.5534  | 34.22577 | 16.07967 |
| 2326  | LOC103240 | 5601.729 | 0.632249 | 0.085739 | 7.3741   | 1.65E-13   | 1.89E-12 | 4359.459 | 4575.268 | 4248.136 | 6792.362 | 6601.296 | 7033.851 |
| 9532  | NCAM2     | 360.7126 | 0.632192 | 0.212401 | 2.976412 | 0.002916   | 0.008134 | 250.986  | 376.0719 | 220.5468 | 475.443  | 417.1266 | 424.1013 |
| 15396 | LOC103220 | 58.44105 | 0.632111 | 0.359087 | 1.760329 | 0.078352   | 0.135294 | 41.19856 | 51.45671 | 43.83108 | 95.98146 | 59.8951  | 58.28881 |
| 21832 | LOC119620 | 8.709888 | 0.631958 | 0.837104 | 0.754934 | 0.050289   | 0.54832  | 4.878777 | 9.306001 | 6.261582 | 8.928508 | 10.84677 | 10.04979 |
| 2572  | STK35     | 5004.225 | 0.631818 | 0.089972 | 7.022414 | 2.18E-12   | 2.25E-11 | 3906.816 | 4051.942 | 3822.348 | 6035.671 | 5760.625 | 6447.948 |
| 12763 | LOC103220 | 97.54648 | 0.631715 | 0.281037 | 2.247803 | 0.024589   | 0.051214 | 80.77087 | 73.35318 | 74.44326 | 151.7846 | 98.39909 | 106.5278 |
| 18219 | LOC103230 | 26.81879 | 0.631217 | 0.486093 | 1.298552 | 0.194098   | 0.283225 | 21.14137 | 21.89647 | 19.48048 | 40.17829 | 32.08666 | 26.12947 |
| 2406  | ITGAV     | 13550.45 | 0.6312   | 0.086889 | 7.26441  | 3.75E-13   | 4.14E-12 | 10558.22 | 11205.52 | 10137.5  | 16171.76 | 15929.96 | 17299.72 |
| 3536  | RRAGC     | 1206.081 | 0.631032 | 0.108432 | 5.819635 | 5.90E-09   | 4.43E-08 | 942.1461 | 967.2767 | 933.6715 | 1412.936 | 1409.674 | 1570.783 |
| 19438 | LOC103210 | 20.44782 | 0.630654 | 0.567232 | 1.11181  | 0.26622    | 0.364104 | 11.38381 | 19.15941 | 17.39328 | 31.24978 | 21.39111 | 22.10955 |
| 2463  | CRIP2     | 4864.927 | 0.630358 | 0.087797 | 7.17971  | 6.99E-13   | 7.54E-12 | 3751.238 | 3800.133 | 3907.227 | 6087.01  | 5563.827 | 6080.126 |
| 8520  | LOC119610 | 190.7775 | 0.630271 | 0.19383  | 3.251676 | 0.001147   | 0.00358  | 156.663  | 141.2322 | 150.9737 | 234.3733 | 235.3022 | 226.1204 |
| 3065  | TNFRSF1A  | 5495.314 | 0.630256 | 0.099806 | 6.314809 | 2.70E-10   | 2.35E-09 | 4175.149 | 4633.294 | 4137.514 | 6533.436 | 6252.62  | 7239.872 |
| 17877 | LOC103230 | 32.52459 | 0.630239 | 0.461867 | 1.364546 | 0.172396   | 0.256371 | 28.18849 | 30.65506 | 18.08902 | 33.4819  | 38.50399 | 46.22906 |
| 12721 | LOC119620 | 89.96982 | 0.630178 | 0.279678 | 2.253228 | 0.024245   | 0.050668 | 73.72375 | 78.27989 | 59.13717 | 116.0706 | 109.0946 | 103.5129 |
| 27792 | LOC119620 | 0.606924 | 0.630078 | 3.346189 | 0.188297 | 0.850644   | NA       | 1.084173 | 0.547412 | 0        | 0        | 0        | 2.009959 |
| 18918 | LOC103220 | 24.2703  | 0.629757 | 0.524653 | 1.200332 | 0.23001    | 0.323228 | 14.09425 | 21.34906 | 21.56767 | 37.94616 | 23.53022 | 27.13445 |
| 23770 | LOC103210 | 4.094875 | 0.629111 | 1.423668 | 0.441895 | 0.658565   | 0.736557 | 2.710432 | 0        | 6.957314 | 4.464254 | 6.417332 | 4.019918 |
| 16107 | LOC103240 | 46.7312  | 0.628946 | 0.382516 | 1.644233 | 0.100128   | 0.165264 | 36.31979 | 31.20247 | 43.13534 | 62.49956 | 44.92132 | 62.30873 |
| 18362 | LOC103240 | 32.55704 | 0.628833 | 0.49443  | 1.271834 | 0.203432   | 0.294535 | 28.18849 | 19.70683 | 27.82925 | 60.26743 | 34.22577 | 25.12449 |
| 17842 | LOC103240 | 32.26916 | 0.628787 | 0.459067 | 1.369707 | 0.170778   | 0.254464 | 30.35684 | 24.08612 | 20.87194 | 37.94616 | 49.19955 | 31.15436 |
| 21387 | LOC103220 | 9.891586 | 0.628582 | 0.76839  | 0.81805  | 0.413329   | 0.513786 | 8.673382 | 7.663765 | 6.957314 | 11.16063 | 12.83466 | 12.05975 |
| 24607 | TRNAA-UG  | 1.470475 | 0.628338 | 1.993989 | 0.315116 | 0.752674   | 0.813176 | 0.542086 | 1.642235 | 1.391463 | 2.232127 | 0        | 3.014938 |
| 9115  | ZC3H12B   | 177.044  | 0.628188 | 0.20401  | 3.079203 | 0.002076   | 0.006054 | 130.6428 | 150.5382 | 135.6676 | 205.3557 | 231.024  | 209.0357 |
| 6073  | KIAA1217  | 1146.483 | 0.627953 | 0.151865 | 4.134931 | 3.55E-05   | 0.000155 | 797.409  | 1098.656 | 808.4399 | 1252.223 | 1409.674 | 1512.494 |
| 3479  | FHL2      | 2344.052 | 0.627916 | 0.106816 | 5.78478  | 4.14E-09   | 3.16E-08 | 1970.484 | 1710.662 | 1848.558 | 2810.248 | 2663.193 | 3061.167 |
| 6432  | LOC103240 | 346.105  | 0.627907 | 0.158264 | 3.967457 | 7.26E-05   | 0.0003   | 275.3799 | 291.7705 | 249.0718 | 424.1041 | 402.1528 | 434.1511 |
| 7949  | ZC4H2     | 270.5166 | 0.627625 | 0.183268 | 3.424628 | 0.000616   | 0.002059 | 188.104  | 244.1457 | 205.9365 | 310.2657 | 337.9795 | 336.6681 |
| 17167 | PRLR      | 48.40136 | 0.627559 | 0.426204 | 1.472438 | 0.140903   | 0.218203 | 33.06727 | 42.69812 | 36.87376 | 58.0353  | 85.56443 | 34.1693  |
| 2808  | CNPPD1    | 2603.971 | 0.6275   | 0.093858 | 6.685596 | 2.30E-11   | 2.18E-10 | 2015.477 | 2058.816 | 2069.801 | 3058.014 | 3061.067 | 3360.651 |
| 18603 | LOC103230 | 46.85733 | 0.62745  | 0.507946 | 1.235268 | 0.216731   | 0.309724 | 49.32986 | 13.13788 | 48.7012  | 53.57105 | 47.06043 | 69.34358 |
| 10960 | TPTE2     | 140.5829 | 0.627283 | 0.237884 | 6.236927 | 0.008366   | 0.020293 | 103.5385 | 96.89189 | 132.189  | 167.4095 | 162.5724 | 180.8963 |
| 2261  | DERL1     | 7221.593 | 0.627263 | 0.083693 | 7.494841 | 6.64E-14   | 7.80E-13 | 5824.718 | 5571.01  | 5636.12  | 8633.867 | 8494.408 | 9169.433 |
| 10154 | RIPOR3    | 348.6134 | 0.627144 | 0.222045 | 2.824408 | 0.004737   | 0.012402 | 312.7838 | 214.038  | 298.4688 | 426.3363 | 314.4493 | 525.6043 |
| 20476 | LOC103240 | 14.3458  | 0.626941 | 0.659686 | 0.950363 | 0.341928   | 0.44392  | 11.38381 | 10.40082 | 11.82743 | 24.5534  | 12.83466 | 15.07469 |
| 3931  | HADH      | 3314.83  | 0.626747 | 0.115672 | 5.418322 | 6.02E-08   | 4.07E-07 | 2813.97  | 2346.754 | 2662.564 | 3906.222 | 3679.27  | 4480.198 |
| 21556 | CN3       | 10.5703  | 0.626316 | 0.786879 | 0.795949 | 0.426061   | 0.525461 | 6.505036 | 9.306001 | 9.04508  | 20.08914 | 6.417332 | 12.05975 |
| 4015  | UBE2L6    | 1538.077 | 0.626246 | 0.11686  | 5.358958 | 8.37E-08   | 5.54E-07 | 1119.95  | 1358.129 | 1150.74  | 1910.701 | 1775.462 | 1913.481 |
| 22164 | LOC119620 | 8.22794  | 0.626168 | 0.897543 | 0.697647 | 0.485398   | 0.58222  | 5.96295  | 7.663765 | 5.565851 | 17.85702 | 4.278221 | 8.039836 |
| 13086 | GALNT9    | 91.35763 | 0.626096 | 0.285883 | 2.190041 | 0.028521</ |          |          |          |          |          |          |          |



|       |           |          |          |          |          |          |          |          |          |          |          |          |          |
|-------|-----------|----------|----------|----------|----------|----------|----------|----------|----------|----------|----------|----------|----------|
| 16155 | LOC103211 | 48.89874 | 0.624703 | 0.381858 | 1.635954 | 0.101849 | 0.167605 | 35.23561 | 48.71965 | 32.00364 | 51.33892 | 57.75599 | 68.3386  |
| 20466 | SPDYC     | 16.53434 | 0.624572 | 0.65643  | 0.951467 | 0.341367 | 0.443431 | 13.01007 | 13.6853  | 11.82743 | 13.39276 | 34.22577 | 13.06473 |
| 4956  | KAT6A     | 3908.579 | 0.62456  | 0.132583 | 4.710702 | 2.47E-06 | 1.32E-05 | 2758.135 | 3727.327 | 2742.573 | 4732.109 | 4449.35  | 5041.982 |
| 21104 | LOC119621 | 14.53553 | 0.624484 | 0.722311 | 0.864565 | 0.387278 | 0.487859 | 15.7205  | 4.926706 | 13.91463 | 11.16063 | 21.39111 | 20.09959 |
| 17816 | LOC119621 | 44.00532 | 0.623829 | 0.45394  | 1.374255 | 0.169363 | 0.252723 | 45.53526 | 30.10765 | 29.22072 | 26.78552 | 62.03421 | 70.34856 |
| 5304  | HPS6      | 921.4392 | 0.623417 | 0.138076 | 4.515028 | 6.33E-06 | 3.17E-05 | 816.9242 | 638.8296 | 723.5606 | 1020.082 | 1110.198 | 1219.04  |
| 24190 | EVA1C     | 2.346664 | 0.623127 | 1.658021 | 0.375825 | 0.707047 | 0.777018 | 2.710432 | 2.189647 | 0.695731 | 4.464254 | 0        | 0.019918 |
| 5777  | TECPR1    | 1183.825 | 0.623091 | 0.14539  | 4.285646 | 1.82E-05 | 8.39E-05 | 1031.59  | 790.4627 | 978.1983 | 1439.722 | 1244.962 | 1618.017 |
| 15492 | CCDC189   | 54.66939 | 0.622806 | 0.356664 | 1.746197 | 0.080777 | 0.138617 | 47.7036  | 42.15071 | 38.26523 | 82.5887  | 62.03421 | 55.27387 |
| 4151  | TCAF1     | 6807.72  | 0.622518 | 0.118427 | 5.256575 | 1.47E-07 | 9.40E-07 | 4970.932 | 6241.042 | 4874.99  | 7973.158 | 7856.953 | 8929.243 |
| 3355  | AACS      | 3664.395 | 0.621975 | 0.103897 | 5.986478 | 2.14E-09 | 1.70E-08 | 3059.535 | 2767.167 | 2838.584 | 4305.773 | 4122.066 | 4893.245 |
| 16640 | LOC103211 | 45.84524 | 0.621758 | 0.400942 | 1.550744 | 0.120963 | 0.193257 | 38.48813 | 27.37059 | 41.74388 | 55.80317 | 68.45154 | 43.21412 |
| 3886  | AP5B1     | 1308.797 | 0.621657 | 0.113902 | 5.4578   | 4.82E-08 | 3.30E-07 | 1104.23  | 986.4361 | 1006.028 | 1573.65  | 1475.986 | 1706.455 |
| 4497  | PPP1R37   | 1901.68  | 0.62142  | 0.123995 | 5.011661 | 5.40E-07 | 3.19E-06 | 1602.407 | 1361.961 | 1536.175 | 2252.216 | 2051.407 | 2605.912 |
| 21918 | LOC103241 | 9.327486 | 0.621325 | 0.837892 | 0.741534 | 0.45837  | 0.555971 | 4.878777 | 6.568942 | 10.43597 | 8.928508 | 17.11289 | 8.039836 |
| 3566  | ZNF623    | 2573.628 | 0.620991 | 0.107285 | 5.788218 | 7.11E-09 | 5.30E-08 | 1959.1   | 2231.798 | 1896.564 | 2999.979 | 3026.842 | 3327.487 |
| 3135  | LAMP1     | 5898.462 | 0.620968 | 0.099525 | 6.239323 | 4.39E-10 | 3.73E-09 | 4468.418 | 5019.219 | 4461.725 | 7035.664 | 6697.555 | 7708.193 |
| 14017 | LOC103231 | 81.78688 | 0.620957 | 0.30891  | 2.010158 | 0.044414 | 0.084238 | 62.88202 | 62.95236 | 66.09448 | 131.6955 | 87.70354 | 79.39338 |
| 11679 | LOC119621 | 248.9138 | 0.620759 | 0.250722 | 2.475892 | 0.01329  | 0.030253 | 234.7234 | 176.2666 | 173.9328 | 323.6584 | 382.9008 | 202.0009 |
| 5703  | ZFP3      | 1250.246 | 0.620744 | 0.143503 | 4.325654 | 1.52E-05 | 7.09E-05 | 831.5605 | 1189.526 | 935.063  | 1482.132 | 1531.603 | 1531.589 |
| 20399 | LOC103221 | 15.22587 | 0.620509 | 0.645274 | 0.961621 | 0.33624  | 0.438205 | 14.09425 | 12.04306 | 9.740239 | 24.5534  | 12.83466 | 18.08963 |
| 21520 | LOC119621 | 13.58568 | 0.620336 | 0.774124 | 0.801339 | 0.422935 | 0.522478 | 10.84173 | 5.474118 | 15.30609 | 29.01765 | 12.83466 | 8.039836 |
| 3681  | PRR13     | 3321.554 | 0.619807 | 0.109359 | 5.667612 | 1.45E-08 | 1.05E-07 | 2450.23  | 2922.084 | 2486.544 | 4078.096 | 3741.305 | 4251.063 |
| 16742 | SERPINC1  | 51.61814 | 0.619514 | 0.403663 | 1.53473  | 0.12485  | 0.198252 | 56.37698 | 35.58177 | 29.22072 | 60.26743 | 77.00798 | 51.25395 |
| 8426  | OTUD1     | 377.7916 | 0.618786 | 0.188951 | 3.274846 | 0.001057 | 0.003335 | 353.4403 | 260.568  | 283.1627 | 415.1756 | 410.7092 | 543.6939 |
| 16413 | DNAH6     | 47.58393 | 0.618744 | 0.389953 | 1.586711 | 0.112578 | 0.182349 | 37.94605 | 39.96106 | 33.39511 | 60.26743 | 72.72976 | 41.20416 |
| 4899  | MGAT4A    | 727.3286 | 0.618397 | 0.130381 | 4.743019 | 2.11E-06 | 1.14E-05 | 618.5205 | 513.4723 | 589.2845 | 910.7078 | 855.6443 | 876.3421 |
| 20658 | LOC119621 | 14.67031 | 0.618386 | 0.666663 | 0.927584 | 0.353623 | 0.455081 | 9.757555 | 8.758589 | 16.00182 | 22.32127 | 17.11289 | 14.06971 |
| 4585  | PPP2R5B   | 1034.313 | 0.618112 | 0.124846 | 4.951    | 7.38E-07 | 4.28E-06 | 852.7019 | 747.7645 | 852.2709 | 1205.349 | 1167.954 | 1379.837 |
| 12198 | NRXN2     | 146.3867 | 0.617958 | 0.261101 | 2.366738 | 0.017946 | 0.039112 | 101.3702 | 136.853  | 105.7512 | 194.195  | 207.4937 | 132.6573 |
| 3927  | DEDD2     | 1189.741 | 0.617711 | 0.113888 | 5.423865 | 5.83E-08 | 3.95E-07 | 945.9407 | 993.005  | 879.4045 | 1466.507 | 1339.083 | 1514.504 |
| 8888  | ZNF517    | 348.4663 | 0.617383 | 0.196174 | 3.147128 | 0.001649 | 0.004931 | 314.9522 | 211.8484 | 300.556  | 401.7829 | 389.3181 | 472.3404 |
| 19532 | LOC119621 | 41.70088 | 0.617294 | 0.563594 | 1.095281 | 0.273394 | 0.372115 | 41.19856 | 8.758589 | 48.7012  | 60.26743 | 47.06043 | 44.2191  |
| 17199 | LOC103221 | 41.20538 | 0.617241 | 0.420513 | 1.467828 | 0.142151 | 0.219732 | 29.27266 | 41.6033  | 25.74206 | 55.80317 | 55.61688 | 39.1942  |
| 3871  | DRAM1     | 1747.476 | 0.617175 | 0.112702 | 5.476171 | 4.35E-08 | 2.98E-07 | 1365.516 | 1472.538 | 1303.105 | 1904.004 | 2175.476 | 2264.219 |
| 15775 | KLLN      | 49.10332 | 0.617165 | 0.361812 | 1.705764 | 0.088052 | 0.148391 | 39.03022 | 38.86624 | 37.56949 | 64.73168 | 64.17332 | 50.24897 |
| 22060 | ZNF843    | 8.824343 | 0.617094 | 0.863022 | 0.715038 | 0.474585 | 0.571934 | 8.673382 | 3.831883 | 8.348776 | 15.62489 | 6.417332 | 10.04979 |
| 16694 | JAK3      | 48.84196 | 0.616966 | 0.399743 | 1.543408 | 0.122732 | 0.195449 | 38.48813 | 26.82318 | 50.09266 | 55.80317 | 70.59065 | 51.25395 |
| 10254 | LOC103241 | 342.1763 | 0.61684  | 0.220259 | 2.800521 | 0.005102 | 0.013228 | 237.4338 | 365.6711 | 206.6322 | 390.6222 | 440.6568 | 412.0416 |
| 4295  | SLC2A13   | 952.9214 | 0.616789 | 0.11957  | 5.158392 | 2.49E-07 | 1.54E-06 | 716.0961 | 814.0014 | 729.1265 | 1095.974 | 1142.285 | 1220.045 |
| 10630 | EFNA2     | 142.7288 | 0.616646 | 0.227419 | 2.7115   | 0.006698 | 0.016751 | 99.20181 | 122.6202 | 116.8829 | 176.338  | 160.4333 | 180.8963 |
| 16649 | LOC119621 | 48.91675 | 0.616425 | 0.398051 | 1.548609 | 0.121476 | 0.193971 | 47.7036  | 30.10765 | 36.87376 | 71.42806 | 64.17332 | 43.21412 |
| 14471 | PRXL2B    | 106.4236 | 0.616187 | 0.319252 | 1.930096 | 0.053595 | 0.09846  | 101.9122 | 53.09895 | 98.09812 | 102.6778 | 139.0422 | 143.7121 |
| 19784 | CARD14    | 44.50807 | 0.616186 | 0.583554 | 1.055919 | 0.291005 | 0.391042 | 33.60935 | 15.87494 | 54.96278 | 55.80317 | 87.70354 | 19.09461 |
| 4393  | LOC103241 | 959.264  | 0.615977 | 0.121178 | 5.083252 | 3.71E-07 | 2.25E-06 | 717.7224 | 793.1997 | 765.3045 | 1055.796 | 1174.372 | 1249.189 |
| 6207  | MTERF2    | 402.2884 | 0.615849 | 0.151319 | 4.069885 | 4.70E-05 | 0.000201 | 305.7367 | 350.3436 | 296.3816 | 493.3001 | 485.5781 | 482.3901 |
| 3347  | WDR7      | 3004.661 | 0.615658 | 0.102661 | 5.997025 | 2.01E-09 | 1.60E-08 | 2323.382 | 2601.848 | 2195.728 | 3542.386 | 3580.871 | 3783.748 |
| 14971 | LOC119621 | 81.96949 | 0.615414 | 0.334526 | 1.83966  | 0.065818 | 0.116878 | 69.92914 | 49.81448 | 74.44326 | 131.6955 | 68.45154 | 97.48301 |
| 6713  | WDR53     | 374.464  | 0.615315 | 0.159801 | 3.85051  | 0.000118 | 0.000467 | 272.6694 | 335.016  | 279.684  | 448.6575 | 453.4915 | 457.2657 |
| 6197  | XYLB      | 497.1165 | 0.615187 | 0.150946 | 4.075535 | 4.59E-05 | 0.000197 | 386.5076 | 442.8562 | 347.17   | 636.1562 | 586.1163 | 583.8931 |
| 15431 | CCDC154   | 54.22056 | 0.615171 | 0.350461 | 1.755321 | 0.079204 | 0.136459 | 43.909   | 38.31883 | 46.614   | 73.66019 | 53.47777 | 69.34358 |
| 27923 | LOC119621 | 0.608699 | 0.615043 | 3.784085 | 0.162534 | 0.870885 | NA       | 0        | 1.642235 | 0        | 0        | 0        | 2.009959 |
| 3019  | TNFRSF10E | 4912.297 | 0.614529 | 0.096195 | 6.388387 | 1.68E-10 | 1.48E-09 | 4038.001 | 3819.292 | 3793.127 | 5828.084 | 5540.297 | 6454.983 |
| 11359 | LOC103231 | 147.9337 | 0.6143   | 0.241252 | 2.546306 | 0.010887 | 0.02548  | 124.6799 | 126.4521 | 98.79385 | 151.7846 | 216.0502 | 169.8415 |
| 2931  | EAF1      | 2300.839 | 0.61399  | 0.094323 | 6.509429 | 7.54E-11 | 6.84E-10 | 1815.989 | 1838.209 | 1805.423 | 2683.017 | 2718.81  | 2943.585 |
| 5911  | ZNF710    | 581.3334 | 0.613827 | 0.13392  | 4.583537 | 4.57E-06 | 2.34E-05 | 454.2684 | 455.4466 | 470.3144 | 743.2983 | 631.0376 | 733.635  |
| 24486 | LOC119611 | 1.734342 | 0.613792 | 1.842801 | 0.333076 | 0.739077 | 0.802433 | 1.084173 | 1.642235 | 1.391463 | 0        | 4.278221 | 2.009959 |
| 16862 | LOC119621 | 39.7566  | 0.613233 | 0.405314 | 1.512982 | 0.130284 | 0.205417 | 32.52518 | 26.27577 | 35.4823  | 42.41041 | 55.61688 | 46.22906 |
| 20616 | CAMKV     | 18.55814 | 0.61319  | 0.656517 | 0.934005 | 0.350301 | 0.451725 | 11.9259  | 13.13788 | 18.08902 | 33.4819  | 25.66933 | 9.044815 |
| 8197  | APOBEC3C  | 795.306  | 0.613028 | 0.183117 | 3.34774  | 0.000815 | 0.002642 | 522.0292 | 836.9927 | 526.6686 | 964.2789 | 971.1562 | 950.7106 |
| 5536  | SLC27A4   | 1160.744 | 0.612594 | 0.13932  | 4.397038 | 1.10E-05 | 5.27E-05 | 1025.085 | 758.7128 | 972.6325 | 1370.526 | 1339.083 | 1498.424 |
| 4562  | TONSL     | 2169.036 | 0.612547 | 0.123373 | 4.965016 | 6.87E-07 | 4.00E-06 | 1831.168 | 1484.581 | 1834.644 | 2600.428 | 2402.221 | 2861.177 |
| 24533 | TRNAQ-CU  | 1.735229 | 0.612155 | 1.881628 | 0.325333 | 0.744929 | 0.807237 | 0.542086 | 2.189647 | 1.391463 | 0        | 4.278221 | 2.009959 |
| 7845  | AP521     | 1662.159 | 0.61202  | 0.177181 | 3.454212 | 0.000552 | 0.00187  | 1545.488 | 939.3587 | 1463.123 | 1888.379 | 1816.105 | 2320.498 |
| 18736 | LOC119611 | 27.17061 | 0.612008 | 0.499047 | 1.226355 | 0.220065 | 0.312256 | 25.47806 | 17.51718 | 20.87194 | 31.24978 | 42.78221 | 25.12449 |
| 5514  | SYNGAP1   | 514.1145 | 0.611957 | 0.138918 | 4.405153 | 1.06E-05 | 5.10E-05 | 384.8813 | 416.5804 | 417.4388 | 593.7458 | 678.0981 | 593.9429 |
| 11219 | LOC119621 | 274.9226 | 0.611875 | 0.237433 | 2.577038 | 0.009965 | 0.023614 | 255.8648 | 171.3399 | 221.9383 | 372.7652 | 391.4573 | 236.1702 |
| 5966  | RUFY2     | 877      | 0.61184  | 0.146362 | 4.180311 | 2.91E-05 | 0.00013  | 633.699  | 834.803  | 612.2436 | 1060.26  | 1056.721 | 1064.273 |
| 14760 | LOC103221 | 67.63798 | 0.61176  | 0.325423 | 1.879887 | 0.060123 | 0.108291 | 56.91907 | 44.88777 | 57.7457  | 84.82083 | 94.12087 | 67.33362 |
| 5235  | ERO1A     | 5643.586 | 0.611644 | 0.134091 | 4.561418 | 5.08E-06 | 2.58E-05 | 3947.473 | 5512.984 | 3933.665 | 691      |          |          |



|       |           |          |          |           |          |          |          |          |          |          |          |          |          |
|-------|-----------|----------|----------|-----------|----------|----------|----------|----------|----------|----------|----------|----------|----------|
| 5450  | AGPAT4    | 510.7332 | 0.610763 | 0.13756   | 4.439981 | 9.00E-06 | 4.39E-05 | 407.6489 | 398.5158 | 408.3943 | 636.1562 | 560.447  | 653.2367 |
| 6146  | CYSTM1    | 1472.66  | 0.610473 | 0.14892   | 4.099339 | 4.14E-05 | 0.000179 | 1279.866 | 911.4407 | 1307.279 | 1852.665 | 1638.559 | 1846.147 |
| 19566 | LOC119623 | 20.2575  | 0.610297 | 0.560262  | 1.089305 | 0.276019 | 0.375037 | 13.01007 | 14.23271 | 20.87194 | 26.78552 | 23.53022 | 23.11453 |
| 5712  | TRAPPC9   | 860.6276 | 0.609995 | 0.141227  | 4.319257 | 1.57E-05 | 7.29E-05 | 755.1263 | 632.2606 | 660.9448 | 1004.457 | 924.0958 | 1186.881 |
| 3754  | RUBCN     | 2181.234 | 0.609906 | 0.109087  | 5.59098  | 2.26E-08 | 1.60E-07 | 1688.599 | 1827.808 | 1669.755 | 2531.232 | 2453.56  | 2916.45  |
| 12594 | LOC103223 | 143.9112 | 0.60985  | 0.266849  | 2.285379 | 0.002291 | 0.047054 | 92.69677 | 145.0641 | 102.2725 | 207.5878 | 171.1289 | 144.717  |
| 7519  | ORAI1     | 553.8105 | 0.609843 | 0.171655  | 3.552721 | 0.000381 | 0.001348 | 499.2615 | 351.9858 | 465.4443 | 720.977  | 579.699  | 705.4956 |
| 18036 | RAC2      | 30.1449  | 0.609485 | 0.455913  | 1.336845 | 0.181273 | 0.267188 | 23.30971 | 21.34906 | 27.13352 | 31.24978 | 40.6431  | 37.18424 |
| 23094 | LOC119623 | 6.133    | 0.609415 | 1.116379  | 0.545886 | 0.585145 | 0.673598 | 5.420864 | 3.831883 | 4.87012  | 6.696381 | 14.97377 | 1.004979 |
| 5060  | KCTD11    | 644.0016 | 0.609393 | 0.13089   | 4.655755 | 3.23E-06 | 1.70E-05 | 527.45   | 511.83   | 493.9693 | 725.4413 | 755.1061 | 850.2126 |
| 21134 | KCNE3     | 13.17526 | 0.609352 | 0.708316  | 0.860282 | 0.389633 | 0.49013  | 8.131296 | 11.49565 | 11.1317  | 17.85702 | 21.39111 | 9.044815 |
| 4675  | EPB41L4B  | 3638.095 | 0.609325 | 0.124312  | 4.901595 | 9.51E-07 | 5.41E-06 | 2653.513 | 3426.251 | 2563.77  | 4390.594 | 4258.969 | 4535.472 |
| 16432 | LOC103233 | 47.48553 | 0.609102 | 0.384555  | 1.583915 | 0.113213 | 0.183165 | 41.19856 | 35.58177 | 34.78657 | 66.96381 | 64.17332 | 42.20914 |
| 10202 | LOC119624 | 167.1909 | 0.608975 | 0.216284  | 2.815631 | 0.004868 | 0.012682 | 146.9054 | 119.8832 | 130.1018 | 225.4448 | 181.8244 | 198.9859 |
| 8127  | TMEM102   | 326.5165 | 0.608951 | 0.180638  | 3.371117 | 0.000749 | 0.002449 | 281.3428 | 225.5337 | 272.031  | 374.9973 | 352.9533 | 452.2408 |
| 22493 | LOC119615 | 7.000075 | 0.608906 | 0.951587  | 0.639884 | 0.522248 | 0.617257 | 7.589209 | 3.284471 | 5.565851 | 6.696381 | 12.83466 | 6.029877 |
| 4090  | LOC103226 | 922.1372 | 0.608885 | 0.114791  | 5.304272 | 1.13E-07 | 7.35E-07 | 725.8536 | 760.355  | 706.8631 | 1120.528 | 1052.442 | 1166.781 |
| 3828  | PECR      | 1844.829 | 0.608753 | 0.110354  | 5.51638  | 3.46E-08 | 2.40E-07 | 1564.461 | 1306.672 | 1513.216 | 2296.859 | 2147.667 | 2240.099 |
| 6318  | PLEKHG4   | 4450.588 | 0.608722 | 0.151518  | 4.017493 | 5.88E-05 | 0.000248 | 4014.692 | 2767.714 | 3798.693 | 5109.339 | 4735.991 | 6277.102 |
| 17917 | LOC119626 | 36.09186 | 0.608664 | 0.448268  | 1.357813 | 0.174523 | 0.258941 | 27.6464  | 21.34906 | 36.17803 | 46.87467 | 51.33866 | 33.16432 |
| 3114  | DNASE1L1  | 4404.44  | 0.608625 | 0.097162  | 6.26403  | 3.75E-10 | 3.20E-09 | 3673.719 | 3345.781 | 3452.219 | 5267.82  | 4962.737 | 5724.363 |
| 19557 | LOC103245 | 19.61189 | 0.60841  | 0.558364  | 1.089631 | 0.275876 | 0.375015 | 14.09425 | 17.51718 | 15.30609 | 20.08914 | 23.53022 | 27.13445 |
| 14898 | VMAC      | 120.324  | 0.608177 | 0.327813  | 1.855255 | 0.06356  | 0.113435 | 129.5586 | 58.02565 | 99.48959 | 151.7846 | 111.2338 | 171.8515 |
| 5009  | TMEM1203  | 914.9303 | 0.607947 | 0.129802  | 4.683642 | 2.82E-06 | 1.50E-05 | 782.2306 | 682.6225 | 714.5161 | 1033.475 | 1039.608 | 1237.13  |
| 3577  | ANXA6     | 4124.247 | 0.607825 | 0.105221  | 5.776673 | 7.62E-09 | 5.66E-08 | 3214.03  | 3468.949 | 3127.313 | 4741.038 | 4654.705 | 5539.447 |
| 6739  | CUNHAorf  | 409.389  | 0.607633 | 0.158169  | 3.841677 | 0.000122 | 0.000482 | 287.8479 | 362.934  | 321.4279 | 488.8358 | 521.943  | 473.3453 |
| 3694  | TPM2      | 3761.449 | 0.607617 | 0.1076    | 5.647005 | 1.63E-08 | 1.18E-07 | 2736.452 | 3301.441 | 2907.461 | 4589.253 | 4233.3   | 4800.787 |
| 21175 | LOC119626 | 13.23441 | 0.607183 | 0.710476  | 0.854615 | 0.392765 | 0.493112 | 10.84173 | 10.94824 | 9.044508 | 24.5534  | 14.97377 | 9.044815 |
| 11130 | ATP8B3    | 128.5062 | 0.60713  | 0.23381   | 2.596682 | 0.009413 | 0.022484 | 100.286  | 95.24966 | 109.2298 | 167.4095 | 156.1551 | 142.7071 |
| 5287  | CLSTN2    | 663.3063 | 0.607054 | 0.134124  | 4.52607  | 6.01E-06 | 3.02E-05 | 559.9752 | 515.1145 | 505.7967 | 747.7625 | 765.8016 | 885.3869 |
| 3421  | SERPINE1  | 41584.28 | 0.606726 | 0.102435  | 5.923036 | 3.16E-09 | 2.46E-08 | 32106.69 | 35355.14 | 31444.97 | 48463.94 | 46138.48 | 55996.45 |
| 5425  | FEM1C     | 1613.632 | 0.606568 | 0.136354  | 4.448484 | 8.65E-06 | 4.24E-05 | 1153.56  | 1517.973 | 1168.829 | 1917.397 | 1807.549 | 2116.487 |
| 4319  | SREBF1    | 7184.147 | 0.606466 | 0.117946  | 5.14191  | 2.72E-07 | 1.67E-06 | 5925.546 | 5168.115 | 6001.379 | 8435.208 | 7649.46  | 9925.177 |
| 4836  | PMM1      | 1186.035 | 0.606459 | 0.126561  | 4.791827 | 1.65E-06 | 9.09E-06 | 974.6713 | 847.3935 | 1003.94  | 1377.222 | 1324.11  | 1588.873 |
| 22775 | LOC119615 | 6.145209 | 0.606291 | 0.1016335 | 0.596547 | 0.55081  | 0.642926 | 5.96295  | 4.926706 | 4.174388 | 4.464254 | 4.278221 | 13.06473 |
| 13377 | LOC103245 | 134.2304 | 0.606222 | 0.284417  | 2.131458 | 0.033051 | 0.065685 | 140.4004 | 71.71095 | 107.1426 | 158.481  | 166.8506 | 160.7967 |
| 8909  | ZNFS47    | 253.2719 | 0.605987 | 0.192869  | 3.141954 | 0.001678 | 0.005008 | 227.6763 | 167.508  | 206.6322 | 325.8905 | 299.4755 | 292.449  |
| 19348 | MOV10L1   | 27.65395 | 0.605906 | 0.537422  | 1.127431 | 0.25956  | 0.356647 | 21.14137 | 19.15941 | 24.3506  | 42.41041 | 42.78221 | 16.07967 |
| 7995  | ZC2HC1C   | 292.3754 | 0.605797 | 0.17746   | 3.413701 | 0.000641 | 0.002131 | 238.518  | 250.1672 | 206.6322 | 314.7299 | 391.4573 | 352.7478 |
| 19964 | LOC103215 | 20.44486 | 0.605712 | 0.58478   | 1.535795 | 0.300298 | 0.399891 | 15.7205  | 16.96977 | 15.30609 | 20.08914 | 38.50399 | 16.07967 |
| 11417 | LOC119624 | 152.1784 | 0.605661 | 0.239176  | 2.532285 | 0.011332 | 0.026386 | 126.3061 | 97.4393  | 137.7548 | 174.1059 | 209.6328 | 167.8316 |
| 3361  | ESYT1     | 7327.824 | 0.605491 | 0.101309  | 5.976674 | 2.28E-09 | 1.80E-08 | 5917.957 | 5717.716 | 5808.661 | 8522.261 | 8092.256 | 9908.093 |
| 25158 | LOC119615 | 1.192361 | 0.605472 | 2.744711  | 0.220596 | 0.825407 | 0.872272 | 0        | 0        | 2.782925 | 2.232127 | 2.139111 | 0        |
| 6542  | LOC119615 | 1474.921 | 0.605111 | 0.154227  | 3.923507 | 8.73E-05 | 0.000355 | 1213.189 | 996.2895 | 1306.584 | 1709.809 | 1493.099 | 2130.556 |
| 2789  | NDUFA5    | 2625.737 | 0.605074 | 0.090077  | 6.717301 | 1.85E-11 | 1.76E-10 | 2017.103 | 2133.811 | 2096.239 | 3218.727 | 3202.249 | 3086.292 |
| 18895 | LOC119615 | 28.56351 | 0.60506  | 0.502105  | 1.205046 | 0.228185 | 0.321094 | 25.47806 | 19.15941 | 23.65487 | 44.64254 | 19.252   | 39.1942  |
| 5666  | PLEKHA4   | 608.6908 | 0.604911 | 0.139379  | 4.340042 | 1.42E-05 | 6.68E-05 | 439.632  | 541.9377 | 468.2272 | 714.2806 | 727.2976 | 760.7695 |
| 2984  | GALNT11   | 2917.092 | 0.604881 | 0.093841  | 6.445798 | 1.15E-10 | 1.02E-09 | 2325.008 | 2358.798 | 2263.91  | 3415.154 | 3384.073 | 3755.608 |
| 4777  | TBCC      | 604.8222 | 0.604613 | 0.125304  | 4.825189 | 1.40E-06 | 7.78E-06 | 480.2885 | 473.5112 | 485.6205 | 761.1553 | 703.7674 | 724.5902 |
| 13673 | BICRA     | 78.98783 | 0.604512 | 0.291476  | 2.073966 | 0.038082 | 0.074045 | 55.8349  | 67.87906 | 64.00729 | 104.91   | 89.84265 | 91.45313 |
| 6696  | LOC119623 | 392.0828 | 0.603745 | 0.156472  | 3.858496 | 0.000114 | 0.000453 | 336.6356 | 288.486  | 310.9919 | 444.1933 | 455.6306 | 516.5594 |
| 19629 | CUNH19orf | 22.69992 | 0.603395 | 0.558413  | 1.080554 | 0.279895 | 0.379083 | 19.51511 | 11.49565 | 22.95914 | 35.71403 | 21.39111 | 25.12449 |
| 12633 | ZNFS385A  | 166.5177 | 0.603371 | 0.265295  | 2.274336 | 0.022946 | 0.048283 | 92.15468 | 175.1718 | 128.7103 | 212.0521 | 201.0764 | 189.9411 |
| 3534  | UBL3      | 2139.61  | 0.603179 | 0.103591  | 5.822692 | 5.79E-09 | 4.36E-08 | 1744.434 | 1746.244 | 1609.227 | 2566.946 | 2400.082 | 2770.728 |
| 23529 | LOC103233 | 6.498696 | 0.603139 | 1.260089  | 0.478648 | 0.632189 | 0.714299 | 8.131296 | 5.474118 | 1.391463 | 11.16063 | 12.83466 | 0        |
| 21373 | LOC103244 | 15.3638  | 0.603008 | 0.734515  | 0.820961 | 0.411668 | 0.512057 | 8.131296 | 20.25424 | 7.653045 | 31.24978 | 12.83466 | 12.05975 |
| 23975 | LOC119623 | 3.238956 | 0.602717 | 1.467072  | 0.41083  | 0.681197 | 0.755355 | 0.542086 | 1.094824 | 6.261582 | 2.232127 | 4.278221 | 5.024897 |
| 3404  | LPCAT1    | 1862.818 | 0.60265  | 0.101413  | 5.942535 | 2.81E-09 | 2.19E-08 | 1517.3   | 1516.331 | 1407.465 | 2205.341 | 2147.667 | 2382.806 |
| 10675 | S1PR2     | 144.4358 | 0.602633 | 0.223345  | 2.698217 | 0.006971 | 0.017361 | 106.2489 | 122.6202 | 116.1871 | 176.338  | 158.2942 | 186.9262 |
| 3324  | ARHGAP1   | 7762.712 | 0.602112 | 0.100012  | 6.020387 | 1.74E-09 | 1.39E-08 | 6186.29  | 6226.262 | 6092.52  | 9069.132 | 8554.304 | 10447.77 |
| 22033 | PPP1R36   | 9.728637 | 0.602001 | 0.836156  | 0.719963 | 0.471548 | 0.568969 | 7.589209 | 6.02153  | 9.044508 | 17.85702 | 12.83466 | 5.024897 |
| 20410 | RASL10A   | 17.2808  | 0.60176  | 0.62697   | 0.959791 | 0.337161 | 0.439168 | 15.7205  | 10.94824 | 13.91463 | 20.08914 | 29.94755 | 13.06473 |
| 4927  | SLC25A44  | 1503.294 | 0.601488 | 0.12719   | 4.729034 | 2.26E-06 | 1.22E-05 | 1151.391 | 1378.93  | 1054.033 | 1758.916 | 1769.045 | 1907.451 |
| 5445  | UTP23     | 1711.239 | 0.601392 | 0.135389  | 4.441953 | 8.91E-06 | 4.35E-05 | 1196.385 | 1628.55  | 1251.621 | 2122.753 | 2113.441 | 1954.685 |
| 23806 | PP2D1     | 4.121951 | 0.601382 | 1.380649  | 0.43558  | 0.663142 | 0.740554 | 2.168345 | 3.831883 | 3.478657 | 6.696381 | 8.556443 | 0        |
| 21537 | SOX9      | 10.84851 | 0.601364 | 0.752313  | 0.799353 | 0.424086 | 0.523486 | 7.589209 | 8.211177 | 9.740239 | 13.39276 | 17.11289 | 9.044815 |
| 25266 | LOC119623 | 0.866543 | 0.601326 | 2.946718  | 0.204066 | 0.383302 | 0.882065 | 0.542086 | 1.642235 | 0        | 0        | 0        | 3.014938 |
| 11460 | LOC103245 | 225.7537 | 0.601309 | 0.238169  | 2.524711 | 0.011579 | 0.026862 | 214.6662 | 122.0728 | 201.7621 | 267.8552 | 273.8062 | 274.3594 |
| 14436 | FRAT1     | 74.9636  | 0.601296 | 0.310375  | 1.937323 | 0.052706 | 0.097062 | 60.71367 | 60.2153  | 57.04997 | 75.89232 | 115.512  | 80.39836 |
| 23359 | LOC119615 | 4.11195  | 0.600615 | 1.189389  | 0.5      |          |          |          |          |          |          |          |          |



|       |           |          |          |          |          |          |          |          |          |          |          |          |          |
|-------|-----------|----------|----------|----------|----------|----------|----------|----------|----------|----------|----------|----------|----------|
| 2730  | STMP1     | 2925.999 | 0.599573 | 0.0881   | 6.805581 | 1.01E-11 | 9.80E-11 | 2258.332 | 2390     | 2330.004 | 3564.707 | 3548.785 | 3464.164 |
| 23642 | LOC119623 | 3.816974 | 0.59941  | 1.295533 | 0.462675 | 0.643598 | 0.723714 | 2.168345 | 3.831883 | 2.782925 | 6.696381 | 6.417332 | 1.004979 |
| 4549  | CACNB3    | 1517.474 | 0.599143 | 0.120429 | 4.975078 | 6.52E-07 | 3.81E-06 | 1273.903 | 1058.694 | 1291.277 | 1805.791 | 1730.541 | 1944.635 |
| 6430  | LOC119620 | 448.0734 | 0.59903  | 0.150958 | 3.968187 | 7.24E-05 | 0.000299 | 332.2989 | 378.2616 | 357.6059 | 602.6743 | 491.9955 | 525.6043 |
| 11332 | CUNH2orf1 | 144.8511 | 0.598994 | 0.234827 | 2.550782 | 0.010748 | 0.025215 | 100.8281 | 126.9995 | 118.2743 | 147.3204 | 196.7982 | 178.8863 |
| 7951  | LOC103231 | 347.1884 | 0.598851 | 0.17488  | 3.424342 | 0.000616 | 0.002061 | 242.8547 | 326.8049 | 258.1163 | 419.6399 | 425.683  | 410.0316 |
| 18525 | CUNH2orf1 | 26.16839 | 0.598622 | 0.480091 | 1.246893 | 0.212437 | 0.304865 | 20.0572  | 20.80165 | 21.56767 | 33.4819  | 29.94755 | 31.15436 |
| 19667 | LOC119621 | 20.62066 | 0.598524 | 0.556666 | 1.075194 | 0.282288 | 0.381565 | 12.46799 | 16.42235 | 20.17621 | 29.01765 | 23.53022 | 22.10955 |
| 5701  | SYNPO     | 1904.846 | 0.598455 | 0.138313 | 4.3268   | 1.51E-05 | 7.06E-05 | 1328.112 | 1849.705 | 1367.808 | 2330.341 | 2239.649 | 2313.463 |
| 18504 | LOC103215 | 27.95427 | 0.598267 | 0.478117 | 1.2513   | 0.210825 | 0.302896 | 21.68345 | 23.53871 | 20.87194 | 42.41041 | 32.08666 | 27.13445 |
| 21698 | UBAP1L    | 12.64981 | 0.598095 | 0.769071 | 0.777685 | 0.436755 | 0.535099 | 13.01007 | 5.474118 | 11.1317  | 17.85702 | 21.39111 | 7.034856 |
| 17446 | FOSB      | 39.13313 | 0.598057 | 0.421442 | 1.419071 | 0.155878 | 0.237521 | 23.30971 | 36.12918 | 33.39511 | 53.57105 | 49.19955 | 39.1942  |
| 24849 | LOC119615 | 1.185248 | 0.598009 | 2.184986 | 0.27369  | 0.784323 | 0.839098 | 1.626259 | 0.547412 | 0.695731 | 2.232127 | 0        | 2.009959 |
| 11529 | TMEM198   | 168.0589 | 0.598004 | 0.238431 | 2.508083 | 0.012139 | 0.027991 | 146.9054 | 107.2927 | 148.8865 | 203.1236 | 168.9897 | 233.1552 |
| 23793 | LOC119624 | 3.772773 | 0.597838 | 1.368393 | 0.436891 | 0.662191 | 0.739748 | 2.710432 | 2.737059 | 3.478657 | 0        | 10.69555 | 3.014938 |
| 17463 | CUNH1orf1 | 41.71651 | 0.597732 | 0.421912 | 1.416721 | 0.156564 | 0.238348 | 41.74065 | 22.9913  | 35.4823  | 46.87467 | 44.92132 | 58.28881 |
| 18359 | LOC103221 | 31.54186 | 0.59765  | 0.469858 | 1.271982 | 0.20338  | 0.294491 | 27.6464  | 19.15941 | 27.82925 | 49.10679 | 36.36488 | 29.1444  |
| 18955 | BHLHA15   | 27.64694 | 0.597393 | 0.500438 | 1.193741 | 0.232579 | 0.32618  | 22.76763 | 18.06459 | 24.3506  | 37.94616 | 40.6431  | 22.10955 |
| 20288 | PTPN22    | 19.52768 | 0.597047 | 0.60925  | 0.979971 | 0.327101 | 0.428626 | 17.88885 | 10.40082 | 18.08902 | 35.71403 | 14.97377 | 20.09959 |
| 17371 | ARHGAP3C  | 42.58448 | 0.596921 | 0.415727 | 1.435849 | 0.151045 | 0.231163 | 25.47806 | 36.67659 | 38.96096 | 46.87467 | 66.31243 | 41.20416 |
| 20244 | LOC119621 | 17.35199 | 0.596855 | 0.603883 | 0.988362 | 0.322975 | 0.42412  | 17.88885 | 11.49565 | 11.82743 | 24.5534  | 19.252   | 19.09461 |
| 22648 | LOC119624 | 6.162322 | 0.596818 | 0.969574 | 0.615547 | 0.538194 | 0.63175  | 3.794605 | 6.02153  | 4.87012  | 6.696381 | 8.556443 | 7.034856 |
| 7854  | LOC119620 | 409.5    | 0.596811 | 0.172868 | 3.452416 | 0.000556 | 0.001881 | 294.3529 | 372.7874 | 313.0791 | 508.925  | 417.1266 | 550.7287 |
| 4511  | EVI5L     | 887.6915 | 0.596793 | 0.119206 | 5.006412 | 5.55E-07 | 3.27E-06 | 706.3385 | 728.6051 | 685.9911 | 1129.456 | 973.2954 | 1102.462 |
| 6685  | LOC103221 | 636.6098 | 0.59652  | 0.154418 | 3.863019 | 0.000112 | 0.000445 | 527.9921 | 430.2657 | 564.9339 | 792.4051 | 675.959  | 828.1031 |
| 3171  | CPQ       | 3464.087 | 0.596066 | 0.096224 | 6.194531 | 5.85E-10 | 4.90E-09 | 2816.139 | 2774.283 | 2690.393 | 4073.632 | 3916.712 | 4513.363 |
| 18870 | CUNH6orf1 | 28.68947 | 0.596023 | 0.493096 | 1.208736 | 0.226764 | 0.319477 | 23.8518  | 20.25424 | 24.3506  | 22.32127 | 49.19955 | 32.15934 |
| 5750  | CTSO      | 941.3831 | 0.595888 | 0.138574 | 4.300148 | 1.71E-05 | 7.89E-05 | 685.1972 | 884.0701 | 679.0338 | 1118.296 | 1155.12  | 1126.582 |
| 3160  | FURIN     | 6417.625 | 0.59574  | 0.095973 | 6.207388 | 5.39E-10 | 4.53E-09 | 5123.258 | 4943.676 | 5272.252 | 7758.873 | 7063.343 | 8344.345 |
| 19109 | LOC103221 | 24.98119 | 0.595059 | 0.509664 | 1.16755  | 0.242988 | 0.338052 | 15.7205  | 24.08612 | 19.48048 | 31.24978 | 34.22577 | 25.12449 |
| 3738  | PARP9     | 2848.793 | 0.594882 | 0.10613  | 5.605238 | 2.08E-08 | 1.48E-07 | 2192.739 | 2488.534 | 2130.329 | 3437.476 | 3208.666 | 3635.011 |
| 15249 | DNAAF4    | 92.34308 | 0.594734 | 0.332474 | 1.788815 | 0.073645 | 0.128392 | 67.21871 | 91.96518 | 60.52863 | 82.5887  | 158.2942 | 93.46309 |
| 5590  | MSCOLN1   | 511.5715 | 0.594672 | 0.135869 | 4.376814 | 1.20E-05 | 5.73E-05 | 429.8745 | 393.5891 | 400.0455 | 580.353  | 637.455  | 628.1122 |
| 3941  | NSMCE2    | 1242.454 | 0.594576 | 0.109854 | 5.412439 | 6.22E-08 | 4.19E-07 | 1031.048 | 919.1044 | 1017.855 | 1542.4   | 1510.212 | 1434.106 |
| 15377 | LOC103241 | 66.48709 | 0.593871 | 0.33666  | 1.764006 | 0.077731 | 0.134388 | 66.67662 | 40.50847 | 51.48412 | 82.5887  | 81.28621 | 76.37844 |
| 2898  | NSMAF     | 3147.585 | 0.593669 | 0.090605 | 6.552255 | 5.67E-11 | 5.20E-10 | 2492.513 | 2570.098 | 2467.759 | 3604.885 | 3792.643 | 3957.609 |
| 19077 | LOC103221 | 26.43308 | 0.593607 | 0.505872 | 1.173434 | 0.240622 | 0.335322 | 27.10432 | 18.612   | 18.08902 | 26.78552 | 27.80844 | 40.19918 |
| 8749  | LOC119621 | 307.8856 | 0.593586 | 0.186111 | 3.189425 | 0.001426 | 0.004332 | 278.6324 | 213.4906 | 241.4188 | 397.3186 | 397.8746 | 318.5785 |
| 15028 | LOC119624 | 78.17648 | 0.59357  | 0.324745 | 1.827802 | 0.067579 | 0.119542 | 62.33993 | 65.14201 | 57.7457  | 89.28508 | 126.2075 | 68.3386  |
| 3647  | CREG1     | 7117.004 | 0.593504 | 0.10413  | 5.699634 | 1.20E-08 | 8.75E-08 | 5393.217 | 6423.33  | 5203.375 | 8582.528 | 8436.652 | 8662.923 |
| 14283 | IQCIN     | 84.40399 | 0.593388 | 0.301937 | 1.965272 | 0.049383 | 0.091938 | 63.42411 | 75.54283 | 61.22436 | 104.91   | 121.9293 | 79.39338 |
| 18118 | LOC103215 | 35.85126 | 0.593349 | 0.450224 | 1.317897 | 0.187538 | 0.275179 | 29.81475 | 29.01283 | 25.74206 | 44.64254 | 57.75599 | 28.13943 |
| 19669 | LOC119615 | 22.65755 | 0.593292 | 0.551841 | 1.075113 | 0.282324 | 0.381595 | 18.43094 | 15.87494 | 20.87194 | 22.32127 | 19.252   | 39.1942  |
| 2451  | SLC35G1   | 12042.49 | 0.592536 | 0.082335 | 7.196622 | 6.17E-13 | 6.69E-12 | 9811.763 | 9662.366 | 9340.889 | 14258.83 | 14006.9  | 15174.19 |
| 4891  | LCAT      | 736.1642 | 0.592419 | 0.12477  | 4.74809  | 2.05E-06 | 1.12E-05 | 583.2849 | 602.153  | 579.5442 | 832.5834 | 855.6443 | 963.7753 |
| 4428  | TCP11L1   | 2966.855 | 0.592351 | 0.117092 | 5.058866 | 4.22E-07 | 2.53E-06 | 2186.234 | 2718.447 | 2196.424 | 3428.547 | 3469.638 | 3801.837 |
| 6799  | ZNF341    | 387.078  | 0.592281 | 0.155138 | 3.817771 | 0.000135 | 0.000527 | 313.868  | 335.016  | 276.2054 | 459.8182 | 481.2999 | 456.2607 |
| 15944 | LOC119621 | 56.15759 | 0.592204 | 0.353029 | 1.677492 | 0.093446 | 0.155831 | 53.66655 | 45.43518 | 35.4823  | 66.96381 | 62.03421 | 73.3635  |
| 16444 | CBLN3     | 48.25105 | 0.592146 | 0.3745   | 1.581162 | 0.113841 | 0.184047 | 43.909   | 39.41365 | 31.30791 | 64.73168 | 59.8951  | 50.24897 |
| 22924 | TRNAG-UC  | 7.458275 | 0.592128 | 1.028602 | 0.575663 | 0.564843 | 0.655025 | 3.794605 | 2.189647 | 11.82743 | 15.62489 | 4.278221 | 7.034856 |
| 21884 | PNW       | 13.56629 | 0.592038 | 0.792678 | 0.746883 | 0.455134 | 0.552904 | 9.215468 | 6.02153  | 16.69755 | 15.62489 | 27.80844 | 6.029877 |
| 3801  | ISCU      | 3072.586 | 0.591996 | 0.106852 | 5.540356 | 3.02E-08 | 2.11E-07 | 2345.608 | 2711.878 | 2298.001 | 3653.992 | 3499.585 | 3926.455 |
| 15987 | LOC119615 | 66.40733 | 0.59182  | 0.354783 | 1.66812  | 0.095292 | 0.158462 | 49.32986 | 48.17224 | 60.52863 | 64.73168 | 113.3729 | 62.30873 |
| 13442 | TBXAS1    | 97.88139 | 0.591672 | 0.279268 | 2.118655 | 0.03412  | 0.06748  | 80.77087 | 68.42648 | 83.48776 | 133.9276 | 126.2075 | 94.46807 |
| 6107  | LGALS8    | 647.591  | 0.591604 | 0.143696 | 4.117067 | 3.84E-05 | 0.000167 | 464.0259 | 590.6573 | 496.7522 | 732.1376 | 782.9145 | 819.0583 |
| 21610 | LOC103241 | 17.03077 | 0.59158  | 0.749306 | 0.789504 | 0.429817 | 0.528769 | 17.88885 | 7.663765 | 14.61036 | 42.41041 | 8.556443 | 11.05477 |
| 3045  | SYTL2     | 2563.516 | 0.591525 | 0.093211 | 6.346097 | 2.21E-10 | 1.93E-09 | 2089.743 | 2068.122 | 1980.747 | 3060.246 | 2956.251 | 3225.984 |
| 19473 | LOC119615 | 25.26736 | 0.591506 | 0.535516 | 1.104554 | 0.269353 | 0.367727 | 15.7205  | 17.51718 | 27.13352 | 22.32127 | 42.78221 | 26.12947 |
| 22231 | LOC103221 | 9.046825 | 0.591378 | 0.86054  | 0.687217 | 0.491946 | 0.588295 | 7.047123 | 8.211177 | 6.261582 | 4.464254 | 19.252   | 9.044815 |
| 21495 | LOC103221 | 11.23091 | 0.59136  | 0.735432 | 0.804099 | 0.42134  | 0.521113 | 8.673382 | 7.663765 | 10.43597 | 17.85702 | 10.69555 | 12.05975 |
| 3783  | MIDEAS    | 3450.79  | 0.591278 | 0.106371 | 5.558661 | 2.72E-08 | 1.91E-07 | 2574.91  | 3049.631 | 2638.909 | 4075.864 | 3944.52  | 4420.905 |
| 4119  | CPT2      | 1292.617 | 0.591089 | 0.112022 | 5.276561 | 1.32E-07 | 8.50E-07 | 1010.449 | 1116.72  | 969.1538 | 1493.293 | 1538.021 | 1628.067 |
| 22983 | TRNAS-AG  | 5.901486 | 0.590915 | 1.042037 | 0.567077 | 0.570662 | 0.660098 | 2.168345 | 5.474118 | 6.261582 | 8.928508 | 8.556443 | 4.019918 |
| 2825  | OAT       | 5405.293 | 0.590649 | 0.088751 | 6.655121 | 2.83E-11 | 2.66E-10 | 4397.405 | 4494.251 | 4051.94  | 6361.562 | 6434.445 | 6692.158 |
| 24009 | LOC119621 | 3.496231 | 0.590294 | 1.456818 | 0.405194 | 0.685335 | 0.758867 | 1.626259 | 4.379295 | 2.782925 | 0        | 2.139111 | 10.04979 |
| 5751  | FAM185A   | 500.0349 | 0.590209 | 0.137255 | 4.300079 | 1.71E-05 | 7.89E-05 | 424.4536 | 397.421  | 376.3907 | 593.7458 | 586.1163 | 622.0823 |
| 10412 | SLC37A1   | 166.7499 | 0.590008 | 0.213495 | 2.76357  | 0.005717 | 0.014598 | 137.1479 | 126.9995 | 137.0591 | 174.1059 | 201.0764 | 224.1104 |
| 14951 | LOC103221 | 77.54327 | 0.589637 | 0.319517 | 1.845399 | 0.06498  | 0.115543 | 73.72375 | 47.62483 | 63.31155 | 102.6778 | 100.5382 | 77.38342 |
| 5663  | LOC119621 | 737.0947 | 0.589616 | 0.135824 | 4.341026 | 1.42E-05 | 6.66E-05 | 602.258  | 519.4938 | 645.6387 | 912.9399 | 825.6967 | 916.5413 |
| 5299  | HHAT      | 616.4345 |          |          |          |          |          |          |          |          |          |          |          |



|       |           |          |          |          |          |          |          |          |          |          |          |          |          |
|-------|-----------|----------|----------|----------|----------|----------|----------|----------|----------|----------|----------|----------|----------|
| 2666  | LOC103240 | 7046.469 | 0.588314 | 0.085549 | 6.876912 | 6.12E-12 | 6.10E-11 | 5522.776 | 5954.746 | 5411.399 | 8316.905 | 8462.322 | 8610.664 |
| 19580 | LOC103238 | 27.36875 | 0.588228 | 0.540914 | 1.08747  | 0.276829 | 0.375811 | 16.80468 | 31.20247 | 16.69755 | 33.4819  | 44.92132 | 21.10457 |
| 5147  | GPHN      | 1466.501 | 0.588182 | 0.127716 | 4.605375 | 4.12E-06 | 2.13E-05 | 1093.388 | 1352.655 | 1070.731 | 1756.684 | 1649.254 | 1876.297 |
| 5227  | PRDX1     | 34139.59 | 0.588078 | 0.128789 | 4.566215 | 4.97E-06 | 2.53E-05 | 30387.74 | 21530.25 | 29912.97 | 40749.71 | 39787.46 | 42469.43 |
| 17186 | LOC103221 | 42.04754 | 0.588073 | 0.400207 | 1.469423 | 0.141718 | 0.219224 | 36.86187 | 27.918   | 36.17803 | 40.17829 | 59.8951  | 51.25395 |
| 3105  | ATP5MF    | 6273.158 | 0.588027 | 0.093739 | 6.273057 | 3.54E-10 | 3.03E-09 | 5030.019 | 4687.487 | 5315.388 | 7783.427 | 7726.468 | 7096.16  |
| 3756  | CELSR2    | 7515.93  | 0.587852 | 0.105234 | 5.586139 | 2.32E-08 | 1.64E-07 | 6193.337 | 5754.393 | 6075.822 | 8571.368 | 8289.054 | 10209.59 |
| 21092 | LOC119615 | 165.8854 | 0.587668 | 0.678366 | 0.8663   | 0.386326 | 0.486937 | 54.20864 | 261.1154 | 82.0963  | 223.2127 | 196.7982 | 177.8814 |
| 5551  | SYNJ1     | 969.5412 | 0.587537 | 0.133774 | 4.391997 | 1.12E-05 | 5.38E-05 | 697.1231 | 893.3761 | 735.3881 | 1149.545 | 1118.755 | 1223.06  |
| 9158  | PUSL1     | 531.982  | 0.587498 | 0.191771 | 3.063534 | 0.002187 | 0.00635  | 482.4569 | 306.5506 | 488.4034 | 633.9241 | 586.1163 | 694.4408 |
| 4155  | MYO5B     | 3138.796 | 0.587488 | 0.111827 | 5.253539 | 1.49E-07 | 9.55E-07 | 2476.793 | 2710.236 | 2343.223 | 3674.081 | 3439.69  | 4188.754 |
| 5748  | SEC62     | 6327.262 | 0.587149 | 0.136528 | 4.300584 | 1.70E-05 | 7.88E-05 | 4374.095 | 6274.434 | 4522.95  | 7258.877 | 7844.119 | 7689.098 |
| 17580 | LOC119628 | 50.05863 | 0.586805 | 0.41805  | 1.403671 | 0.160417 | 0.242587 | 48.78777 | 37.77142 | 32.00364 | 58.0353  | 85.56443 | 38.18922 |
| 4615  | CASP6     | 1072.94  | 0.586721 | 0.118837 | 4.93721  | 7.92E-07 | 4.57E-06 | 895.5267 | 886.8071 | 791.7423 | 1180.795 | 1356.196 | 1326.573 |
| 24196 | LOC119620 | 2.641475 | 0.586717 | 1.56815  | 0.374146 | 0.708296 | 0.77823  | 2.168345 | 0.547412 | 3.478657 | 2.232127 | 6.417332 | 1.004979 |
| 24434 | LOC103238 | 1.774565 | 0.58614  | 1.724806 | 0.33983  | 0.733985 | 0.798631 | 1.084173 | 1.094824 | 2.087194 | 2.232127 | 2.139111 | 2.009959 |
| 4827  | MAP3K12   | 1088.806 | 0.586118 | 0.122221 | 4.795542 | 1.62E-06 | 8.94E-06 | 902.5738 | 869.29   | 842.5307 | 1377.222 | 1142.285 | 1398.931 |
| 22457 | LOC119618 | 7.946888 | 0.586083 | 0.904413 | 0.648026 | 0.516968 | 0.611996 | 4.336691 | 8.758589 | 5.565851 | 11.16063 | 12.83466 | 5.024897 |
| 13213 | LOC103240 | 105.4936 | 0.585879 | 0.270534 | 2.165635 | 0.030339 | 0.061043 | 87.27591 | 71.16354 | 93.92374 | 118.3027 | 149.7377 | 112.5577 |
| 22512 | TRNAK-UU  | 7.388784 | 0.585807 | 0.918305 | 0.637922 | 0.523524 | 0.618243 | 4.878777 | 4.926706 | 8.348776 | 6.696381 | 6.417332 | 13.06473 |
| 3182  | KDEL3     | 3012.053 | 0.585659 | 0.094719 | 6.183141 | 6.28E-10 | 5.25E-09 | 2416.079 | 2422.297 | 2394.012 | 3462.029 | 3484.611 | 3893.29  |
| 21775 | LOC103228 | 10.60308 | 0.585431 | 0.76646  | 0.763812 | 0.444979 | 0.543273 | 7.047123 | 7.116354 | 11.1317  | 11.16063 | 17.11289 | 10.04979 |
| 5556  | LOC103235 | 1175.743 | 0.585253 | 0.133311 | 4.390133 | 1.13E-05 | 5.42E-05 | 960.035  | 858.8891 | 1007.419 | 1424.097 | 1217.154 | 1586.863 |
| 4384  | SAYSD1    | 920.2664 | 0.585237 | 0.114956 | 5.090982 | 3.56E-07 | 2.16E-06 | 764.8839 | 694.1182 | 751.3899 | 1095.974 | 1069.555 | 1145.677 |
| 3958  | PLCD1     | 1707.336 | 0.585233 | 0.10828  | 5.404807 | 6.49E-08 | 4.36E-07 | 1376.899 | 1292.439 | 1432.511 | 2035.7   | 1899.53  | 2206.935 |
| 20705 | MESP2     | 17.19097 | 0.584923 | 0.6359   | 0.919835 | 0.357659 | 0.45923  | 14.09425 | 15.87494 | 11.1317  | 31.24978 | 10.69555 | 20.09959 |
| 7936  | HIVEP3    | 545.791  | 0.584888 | 0.170582 | 3.428774 | 0.000606 | 0.002031 | 368.6187 | 535.3688 | 407.0029 | 662.9417 | 605.3683 | 695.4458 |
| 19707 | EFCAB12   | 21.19013 | 0.584806 | 0.547192 | 1.068741 | 0.285186 | 0.38472  | 20.59928 | 15.32753 | 15.30609 | 20.08914 | 25.66933 | 30.14938 |
| 19555 | LOC119620 | 24.71119 | 0.584492 | 0.536122 | 1.090222 | 0.275615 | 0.374699 | 24.39389 | 13.6853  | 20.87194 | 24.5534  | 40.6431  | 24.11951 |
| 23061 | LOC103220 | 6.147681 | 0.584102 | 1.057861 | 0.552153 | 0.580843 | 0.669603 | 8.131296 | 2.737059 | 4.174388 | 2.232127 | 8.556443 | 11.05477 |
| 16886 | IGSF1     | 68.59268 | 0.58409  | 0.387147 | 1.508703 | 0.131375 | 0.206822 | 53.12446 | 52.55153 | 57.04997 | 84.82083 | 119.7902 | 44.2191  |
| 6880  | DLGAP4    | 1261.431 | 0.583586 | 0.154162 | 3.78555  | 0.000153 | 0.000593 | 838.0655 | 1256.31  | 935.7587 | 1506.686 | 1443.9   | 1587.868 |
| 3209  | TMX4      | 5774.148 | 0.583482 | 0.094847 | 6.151807 | 7.66E-10 | 6.35E-09 | 4471.67  | 4929.991 | 4469.378 | 6772.273 | 6594.878 | 7406.699 |
| 10077 | MCFL2L    | 198.387  | 0.583219 | 0.20517  | 2.842617 | 0.004474 | 0.011805 | 163.7101 | 155.465  | 157.931  | 194.195  | 273.8062 | 245.215  |
| 11705 | RAB26     | 157.3058 | 0.583216 | 0.236018 | 2.471062 | 0.013471 | 0.030597 | 142.0266 | 101.8186 | 134.9719 | 162.9453 | 201.0764 | 200.9959 |
| 3651  | SLC6A8    | 10235.73 | 0.58302  | 0.102331 | 5.697422 | 1.22E-08 | 8.86E-08 | 8151.353 | 8417.551 | 8023.87  | 11986.52 | 11069.9  | 13765.2  |
| 6233  | WDR44     | 1087.62  | 0.582892 | 0.143576 | 4.059824 | 4.91E-05 | 0.000209 | 772.4731 | 1053.768 | 786.1764 | 1290.169 | 1300.579 | 1322.553 |
| 18591 | MAMSTR    | 33.75557 | 0.582663 | 0.471265 | 1.236383 | 0.216316 | 0.309331 | 26.02015 | 27.37059 | 26.43779 | 55.80317 | 42.78221 | 24.11951 |
| 12237 | FRAT2     | 124.3055 | 0.582634 | 0.246914 | 2.359662 | 0.018292 | 0.039739 | 111.6698 | 100.1764 | 85.57496 | 167.4095 | 143.3204 | 137.6822 |
| 4721  | DBR1      | 1464.193 | 0.58245  | 0.119608 | 4.869664 | 1.12E-06 | 6.30E-06 | 1171.991 | 1299.008 | 1044.293 | 1863.826 | 1700.593 | 1705.45  |
| 4219  | MRPL14    | 4858.461 | 0.582447 | 0.111862 | 5.206835 | 1.92E-07 | 1.21E-06 | 4124.193 | 3323.885 | 4225.872 | 5899.512 | 5675.061 | 5902.244 |
| 5944  | INSIG2    | 541.6017 | 0.582171 | 0.138983 | 4.18879  | 2.80E-05 | 0.000125 | 443.4267 | 460.3733 | 395.8711 | 694.1915 | 624.6203 | 631.1271 |
| 3827  | SELENOT   | 10089.81 | 0.582125 | 0.105524 | 5.516521 | 3.46E-08 | 2.40E-07 | 7651.549 | 7978.527 | 8608.284 | 12323.57 | 13251.79 | 10725.14 |
| 23790 | LOC103240 | 3.225455 | 0.581517 | 1.328305 | 0.437789 | 0.661539 | 0.739261 | 2.168345 | 2.737059 | 2.782925 | 2.232127 | 6.417332 | 3.014938 |
| 5828  | UBXN7     | 2204.558 | 0.581303 | 0.136452 | 4.26012  | 2.04E-05 | 9.32E-05 | 1594.276 | 2153.518 | 1551.481 | 2593.732 | 2611.854 | 2722.489 |
| 11383 | SCN3A     | 136.7455 | 0.581055 | 0.22862  | 2.54158  | 0.011035 | 0.025773 | 112.2119 | 109.4824 | 107.1426 | 142.8561 | 183.9635 | 164.8166 |
| 15957 | LOC103220 | 60.91713 | 0.580954 | 0.347076 | 1.673851 | 0.09416  | 0.156864 | 43.36691 | 56.38342 | 46.614   | 55.80317 | 91.98176 | 71.35354 |
| 24780 | PMCH      | 1.450002 | 0.580658 | 2.032525 | 0.285683 | 0.775121 | 0.831581 | 1.626259 | 1.094824 | 0.695731 | 0        | 4.278221 | 1.004979 |
| 5411  | LOC103218 | 4970.703 | 0.580469 | 0.130255 | 4.456421 | 8.33E-06 | 4.09E-05 | 4381.684 | 3460.737 | 4115.947 | 5667.37  | 5277.186 | 6921.294 |
| 5435  | ZNFA436   | 869.8076 | 0.580389 | 0.130574 | 4.44908  | 8.79E-06 | 4.30E-05 | 667.8504 | 791.0101 | 633.1155 | 1026.778 | 1026.773 | 1073.318 |
| 3350  | STT3B     | 11688.51 | 0.580369 | 0.096831 | 5.993607 | 2.05E-09 | 1.63E-08 | 8959.061 | 10367.98 | 8780.826 | 13604.81 | 13891.38 | 14526.98 |
| 14862 | LOC103240 | 66.74056 | 0.580343 | 0.311949 | 1.860379 | 0.062832 | 0.112393 | 52.04029 | 56.93083 | 52.17985 | 78.12444 | 72.72976 | 88.43819 |
| 3752  | ATP6V1G1  | 7176.556 | 0.580193 | 0.103755 | 5.591935 | 2.25E-08 | 1.59E-07 | 5967.829 | 5113.921 | 6173.224 | 9002.168 | 8721.154 | 8081.04  |
| 5351  | SLC35E3   | 564.26   | 0.579794 | 0.129147 | 4.489034 | 7.15E-06 | 3.55E-05 | 430.4166 | 466.9423 | 460.5742 | 667.406  | 673.8199 | 686.401  |
| 18679 | DEGS2     | 31.30893 | 0.579734 | 0.470769 | 1.231462 | 0.21815  | 0.310493 | 33.06727 | 18.06459 | 24.3506  | 37.94616 | 34.22577 | 40.19918 |
| 4696  | LSM1      | 936.5051 | 0.579347 | 0.118571 | 4.886096 | 1.03E-06 | 5.82E-06 | 752.4159 | 698.4975 | 800.0911 | 1151.778 | 1152.981 | 1063.268 |
| 10373 | FAM161B   | 203.2189 | 0.579216 | 0.209059 | 2.770589 | 0.005595 | 0.014341 | 168.0468 | 174.077  | 144.0164 | 279.0159 | 248.1368 | 206.0208 |
| 3367  | FBXL3     | 2165.895 | 0.578867 | 0.096944 | 5.971142 | 2.36E-09 | 1.86E-08 | 1761.239 | 1788.942 | 1664.189 | 2540.161 | 2511.316 | 2729.524 |
| 9133  | LOC119620 | 304.6865 | 0.578393 | 0.188275 | 3.072061 | 0.002126 | 0.006188 | 205.9928 | 294.5076 | 233.07   | 354.9082 | 365.7879 | 373.8524 |
| 3111  | IDI1      | 8609.929 | 0.578363 | 0.092267 | 6.268335 | 3.65E-10 | 3.12E-09 | 6730.002 | 7498.447 | 6489.086 | 10357.07 | 10569.35 | 10015.63 |
| 8907  | AMIGO2    | 288.9042 | 0.577677 | 0.183789 | 3.143152 | 0.001671 | 0.004989 | 230.9288 | 204.1846 | 260.8993 | 383.9258 | 303.7537 | 349.7329 |
| 24262 | IL36G     | 2.622411 | 0.577579 | 1.573077 | 0.367165 | 0.713496 | 0.781811 | 1.626259 | 3.284471 | 1.391463 | 0        | 6.417332 | 3.014938 |
| 15953 | LOC103220 | 66.99105 | 0.577261 | 0.344581 | 1.675254 | 0.093884 | 0.156454 | 52.04029 | 41.05589 | 67.48594 | 93.74933 | 81.28621 | 66.32864 |
| 6635  | CARD19    | 569.0443 | 0.577224 | 0.148537 | 3.886061 | 0.000102 | 0.000408 | 498.7195 | 413.8433 | 460.5742 | 683.0309 | 605.3683 | 752.7296 |
| 6203  | ARHGEF6   | 1105.573 | 0.577216 | 0.141799 | 4.07066  | 4.69E-05 | 0.000201 | 793.0724 | 1066.358 | 802.874  | 1272.312 | 1339.083 | 1359.737 |
| 16847 | KCNK6     | 51.50461 | 0.576555 | 0.380392 | 1.515689 | 0.129598 | 0.204509 | 34.69353 | 38.31883 | 50.09266 | 66.96381 | 72.72976 | 46.22906 |
| 3149  | RAD21     | 11225.3  | 0.576446 | 0.092679 | 6.219806 | 4.98E-10 | 4.20E-09 | 8647.904 | 9705.611 | 8686.902 | 12950.8  | 13099.91 | 14260.66 |
| 23685 | LOC119620 | 4.379697 | 0.576443 | 1.264529 | 0.455856 | 0.648494 | 0.727895 | 3.794605 | 3.284471 | 3.478657 | 0        | 10.69555 | 5.024897 |
| 22818 | LOC119618 | 6.182072 | 0.576111 | 0.976896 | 0.589736 | 0.555368 | 0.647053 | 4.878777 | 4.926706 | 4.87012  | 6.696381 | 10.69555 | 5.024897 |
| 4484  | TTC7A     | 2720.212 | 0.57605  |          |          |          |          |          |          |          |          |          |          |



|       |           |          |          |          |          |          |          |          |          |          |          |          |          |
|-------|-----------|----------|----------|----------|----------|----------|----------|----------|----------|----------|----------|----------|----------|
| 18964 | LOC103221 | 28.00279 | 0.575259 | 0.482489 | 1.192273 | 0.233154 | 0.326851 | 26.02015 | 19.70683 | 21.56767 | 26.78552 | 42.78221 | 31.15436 |
| 17429 | LOC103218 | 43.03867 | 0.575189 | 0.404009 | 1.423704 | 0.154532 | 0.235735 | 34.69353 | 38.31883 | 29.91645 | 44.64254 | 68.45154 | 42.20914 |
| 20046 | LOC119621 | 25.94675 | 0.575028 | 0.56317  | 1.021056 | 0.307228 | 0.407463 | 20.59928 | 31.20247 | 11.1317  | 29.01765 | 23.53022 | 40.19918 |
| 4818  | SIL1      | 1173.368 | 0.574814 | 0.11973  | 4.800933 | 1.58E-06 | 8.71E-06 | 982.8026 | 884.6175 | 965.6751 | 1332.58  | 1319.831 | 1554.703 |
| 4235  | LOC119618 | 3060.495 | 0.574734 | 0.110605 | 5.196255 | 2.03E-07 | 1.28E-06 | 2626.408 | 2258.621 | 2495.588 | 3738.813 | 3289.952 | 3953.589 |
| 4388  | CRAT      | 1365.601 | 0.57447  | 0.112901 | 5.088257 | 3.61E-07 | 2.19E-06 | 1070.078 | 1092.087 | 1134.738 | 1611.596 | 1495.238 | 1789.868 |
| 20992 | LOC103230 | 16.19561 | 0.574364 | 0.652808 | 0.879836 | 0.378948 | 0.47989  | 18.43094 | 8.758589 | 11.82743 | 13.39276 | 25.66933 | 19.09461 |
| 22037 | IFI27     | 9.706279 | 0.574005 | 0.798415 | 0.71893  | 0.472184 | 0.569633 | 8.131296 | 8.758589 | 6.261582 | 8.928508 | 17.11289 | 9.044815 |
| 20766 | HNRNPA11  | 19.46885 | 0.574    | 0.631542 | 0.908887 | 0.36341  | 0.465243 | 24.39389 | 11.49565 | 10.43597 | 22.32127 | 32.08666 | 16.07967 |
| 3924  | KIF1B     | 5839.987 | 0.573823 | 0.105768 | 5.425284 | 5.79E-08 | 3.92E-07 | 4447.819 | 5209.718 | 4427.634 | 6732.095 | 6661.191 | 7561.466 |
| 6710  | CYS1      | 416.8724 | 0.573674 | 0.148967 | 3.851015 | 0.000118 | 0.000466 | 365.3662 | 311.4773 | 328.3852 | 482.1394 | 513.3866 | 500.4798 |
| 21345 | EPGN      | 15.04032 | 0.573608 | 0.69526  | 0.825025 | 0.409357 | 0.509851 | 16.26259 | 7.663765 | 11.82743 | 15.62489 | 27.80844 | 11.05477 |
| 24221 | HCST      | 2.672053 | 0.573383 | 1.546349 | 0.370798 | 0.710788 | 0.780129 | 0.542086 | 1.094824 | 4.87012  | 2.232127 | 4.278221 | 3.014938 |
| 7057  | ABHD18    | 438.2527 | 0.573147 | 0.154559 | 3.708264 | 0.000209 | 0.000786 | 382.713  | 316.9514 | 354.823  | 544.639  | 554.0297 | 476.3603 |
| 16556 | LOC119621 | 48.47592 | 0.57302  | 0.366237 | 1.564615 | 0.117673 | 0.188955 | 40.11439 | 39.41365 | 38.26523 | 49.10679 | 55.61688 | 68.3386  |
| 18279 | ZNF556    | 33.74568 | 0.572965 | 0.444988 | 1.287597 | 0.197886 | 0.287808 | 27.6464  | 30.65506 | 22.2634  | 49.10679 | 40.6431  | 32.15934 |
| 4020  | TMEM68    | 1115.763 | 0.572814 | 0.106928 | 5.357002 | 8.46E-08 | 5.60E-07 | 930.7623 | 865.4581 | 894.0148 | 1321.419 | 1375.448 | 1307.478 |
| 13548 | LOC103240 | 139.3981 | 0.572609 | 0.272849 | 2.098629 | 0.03585  | 0.070347 | 138.232  | 86.49107 | 109.9256 | 160.7131 | 205.3546 | 135.6722 |
| 23308 | FIBCD1    | 5.06894  | 0.57225  | 1.117316 | 0.512165 | 0.608535 | 0.694093 | 2.710432 | 4.379295 | 4.87012  | 11.16063 | 4.278221 | 3.014938 |
| 13781 | SETD9     | 84.33949 | 0.572154 | 0.278991 | 2.050798 | 0.040287 | 0.077717 | 69.92914 | 62.40495 | 71.66033 | 95.98146 | 100.5382 | 105.5228 |
| 18772 | LOC103216 | 46.53549 | 0.572027 | 0.467878 | 1.2226   | 0.221481 | 0.313795 | 42.28274 | 29.56024 | 38.96096 | 53.57105 | 87.70354 | 27.13445 |
| 4010  | LRRC75B   | 1028.261 | 0.571894 | 0.106602 | 5.364752 | 8.11E-08 | 5.37E-07 | 844.0285 | 806.885  | 830.0075 | 1236.598 | 1229.989 | 1222.055 |
| 8866  | PGGHG     | 426.8112 | 0.571822 | 0.181408 | 3.152126 | 0.001621 | 0.00486  | 382.713  | 268.2318 | 381.2608 | 479.9073 | 491.9955 | 556.7586 |
| 23312 | LOC119621 | 4.736482 | 0.571765 | 1.117483 | 0.511654 | 0.608893 | 0.694352 | 5.420864 | 2.737059 | 3.478657 | 4.464254 | 4.278221 | 8.039836 |
| 19652 | FOXP3     | 22.77406 | 0.571688 | 0.530506 | 1.077626 | 0.281201 | 0.38041  | 15.7205  | 16.42235 | 22.95914 | 22.32127 | 32.08666 | 27.13445 |
| 16353 | TMTC2     | 59.08895 | 0.571585 | 0.358221 | 1.595623 | 0.110573 | 0.179758 | 46.07734 | 54.19377 | 41.04815 | 66.96381 | 91.98176 | 54.26889 |
| 10149 | PPP1R3D   | 184.1661 | 0.571512 | 0.202245 | 2.825846 | 0.004716 | 0.012352 | 148.5317 | 137.4004 | 160.0182 | 216.5163 | 205.3546 | 237.1752 |
| 5932  | RAB7A     | 6682.959 | 0.571066 | 0.136183 | 4.19336  | 2.75E-05 | 0.000123 | 4587.677 | 6680.614 | 4863.162 | 7883.872 | 7948.935 | 8132.294 |
| 6904  | DHRS4     | 420.9909 | 0.571022 | 0.15124  | 3.775612 | 0.00016  | 0.000615 | 341.5144 | 362.934  | 309.6005 | 542.4069 | 494.1346 | 475.3553 |
| 10035 | TXNRD2    | 345.6249 | 0.57087  | 0.199987 | 2.854527 | 0.00431  | 0.011418 | 318.7468 | 220.607  | 297.773  | 410.7114 | 346.5359 | 479.3752 |
| 22994 | LOC119621 | 5.912348 | 0.570861 | 1.010788 | 0.564768 | 0.572231 | 0.661602 | 5.96295  | 3.831883 | 4.174388 | 8.928508 | 8.556443 | 4.019918 |
| 19455 | SNX22     | 25.48367 | 0.570464 | 0.514168 | 1.109489 | 0.267219 | 0.365152 | 25.47806 | 15.32753 | 20.17621 | 35.71403 | 32.08666 | 24.11951 |
| 8128  | CCDC74B   | 555.8443 | 0.570168 | 0.169139 | 3.370999 | 0.000749 | 0.00245  | 471.6151 | 380.9986 | 493.9693 | 640.6204 | 569.0034 | 778.8591 |
| 6242  | ZBTB5     | 574.5255 | 0.569844 | 0.140563 | 4.054009 | 5.03E-05 | 0.000214 | 459.1472 | 499.2396 | 432.0492 | 649.549  | 652.4288 | 754.7392 |
| 20322 | LOC103234 | 19.83965 | 0.569754 | 0.584649 | 0.974523 | 0.329797 | 0.431436 | 12.46799 | 18.06459 | 16.69755 | 26.78552 | 29.94755 | 15.07469 |
| 5595  | SLC13A3   | 517.954  | 0.569639 | 0.130195 | 4.375264 | 1.21E-05 | 5.76E-05 | 422.8274 | 412.7485 | 415.3516 | 620.5313 | 618.203  | 618.0624 |
| 5230  | ST3GAL5   | 1046.765 | 0.56962  | 0.124813 | 4.56378  | 5.02E-06 | 2.55E-05 | 816.3821 | 918.0096 | 797.3082 | 1238.83  | 1142.285 | 1367.777 |
| 5533  | SRSF12    | 848.4233 | 0.569553 | 0.129482 | 4.398712 | 1.09E-05 | 5.23E-05 | 657.5508 | 753.7861 | 634.507  | 1084.814 | 1018.217 | 941.6658 |
| 2846  | BNIP3     | 3590.493 | 0.569501 | 0.086035 | 6.619434 | 3.61E-11 | 3.37E-10 | 2974.428 | 2805.486 | 2894.243 | 4232.113 | 4276.082 | 4360.606 |
| 22701 | LOC103218 | 7.76699  | 0.569439 | 0.936072 | 0.608328 | 0.54297  | 0.635868 | 6.505036 | 6.02153  | 6.261582 | 15.62489 | 2.139111 | 10.04979 |
| 3524  | CTDSPL    | 3957.067 | 0.569432 | 0.097618 | 5.833252 | 5.44E-09 | 4.10E-08 | 3116.455 | 3401.617 | 3043.129 | 4796.841 | 4408.707 | 4975.653 |
| 8971  | ZNF613    | 371.8058 | 0.569138 | 0.182115 | 3.125161 | 0.001777 | 0.005267 | 304.6525 | 353.628  | 238.6359 | 439.729  | 462.0479 | 432.1412 |
| 21343 | LOC119621 | 14.53999 | 0.569062 | 0.689583 | 0.825227 | 0.409243 | 0.509745 | 8.673382 | 12.59047 | 13.2189  | 22.32127 | 21.39111 | 9.044815 |
| 18781 | SLC12A8   | 29.70409 | 0.569061 | 0.466039 | 1.22106  | 0.222063 | 0.314337 | 20.59928 | 22.44388 | 28.52499 | 42.41041 | 32.08666 | 32.15934 |
| 21419 | TRNAM-C4  | 12.74575 | 0.568879 | 0.698199 | 0.814781 | 0.015198 | 0.515338 | 11.38381 | 7.116354 | 12.52316 | 13.39276 | 14.97377 | 17.08465 |
| 16997 | LOC119620 | 51.73039 | 0.568823 | 0.381116 | 1.492518 | 0.135563 | 0.212035 | 49.87195 | 45.98259 | 28.52499 | 60.26743 | 68.45154 | 57.28383 |
| 4455  | LOC103238 | 13468.73 | 0.568629 | 0.112865 | 5.038118 | 4.70E-07 | 2.81E-06 | 10024.26 | 12677.51 | 9841.12  | 16544.53 | 15925.68 | 15799.28 |
| 4693  | COL4A5    | 1639.994 | 0.568232 | 0.116251 | 4.887962 | 1.02E-06 | 5.77E-06 | 1415.93  | 1278.207 | 1274.58  | 1841.505 | 1843.913 | 2185.83  |
| 19850 | LOC103218 | 31.32845 | 0.568099 | 0.543236 | 1.045767 | 0.295668 | 0.395012 | 40.65648 | 13.13788 | 21.56767 | 31.24978 | 49.19955 | 32.15934 |
| 18631 | CYP46A1   | 35.8369  | 0.568029 | 0.460274 | 1.234111 | 0.217161 | 0.309867 | 38.48813 | 20.25424 | 27.13352 | 44.64254 | 51.33866 | 33.16432 |
| 5291  | MAPK8IP3  | 2897.912 | 0.568021 | 0.125599 | 4.522503 | 6.11E-06 | 3.07E-05 | 2516.907 | 1995.863 | 2495.588 | 3484.35  | 3105.989 | 3788.773 |
| 8050  | CERS1     | 278.4286 | 0.567966 | 0.167082 | 3.399329 | 0.000676 | 0.002231 | 211.9558 | 228.8181 | 233.07   | 319.1942 | 335.8404 | 341.693  |
| 20700 | LOC103216 | 20.72637 | 0.567891 | 0.615837 | 0.922145 | 0.356453 | 0.457824 | 24.39389 | 15.87494 | 9.044508 | 29.01765 | 29.94755 | 16.07967 |
| 21197 | TNFRSF13C | 15.30746 | 0.567755 | 0.667641 | 0.850389 | 0.395109 | 0.49554  | 11.38381 | 15.32753 | 10.43597 | 8.928508 | 25.66933 | 20.09959 |
| 4546  | LOC103221 | 4610.545 | 0.567732 | 0.113996 | 4.98026  | 6.35E-07 | 3.71E-06 | 3914.948 | 3349.613 | 3886.355 | 5390.587 | 4971.293 | 6150.474 |
| 5084  | DYNLT2B   | 805.079  | 0.567261 | 0.122211 | 4.641643 | 3.46E-06 | 1.81E-05 | 676.5238 | 607.6271 | 663.032  | 899.5472 | 1013.938 | 969.8052 |
| 4816  | TGFB1I1   | 959.1376 | 0.567256 | 0.118119 | 4.80241  | 1.57E-06 | 8.65E-06 | 726.9378 | 820.5703 | 774.349  | 1124.992 | 1090.946 | 1217.03  |
| 17991 | LOC103238 | 45.21761 | 0.56717  | 0.421734 | 1.344851 | 0.178673 | 0.264022 | 35.23561 | 38.86624 | 34.09084 | 44.64254 | 81.28621 | 37.18424 |
| 5574  | PRKAG2    | 3193.45  | 0.567139 | 0.129383 | 4.38342  | 1.17E-05 | 5.57E-05 | 2316.877 | 3096.161 | 2305.654 | 3901.758 | 3893.181 | 3647.07  |
| 24055 | LOC119621 | 2.677248 | 0.567061 | 1.427929 | 0.397121 | 0.691278 | 0.763984 | 2.168345 | 2.189647 | 2.087194 | 4.464254 | 2.139111 | 3.014938 |
| 12133 | RPUSD1    | 231.5586 | 0.566925 | 0.238311 | 2.378928 | 0.017363 | 0.038043 | 226.5921 | 128.6418 | 205.9365 | 267.8552 | 258.8324 | 301.4938 |
| 21301 | CUNHXorf1 | 18.1005  | 0.566836 | 0.679857 | 0.833759 | 0.404417 | 0.504738 | 14.09425 | 14.78012 | 13.91463 | 24.5534  | 34.22577 | 7.034856 |
| 14685 | LOC119620 | 71.80465 | 0.566785 | 0.299563 | 1.892038 | 0.058486 | 0.10588  | 59.08741 | 55.28859 | 59.13717 | 93.74933 | 79.14709 | 84.41828 |
| 6473  | CFAP69    | 549.9362 | 0.56678  | 0.143463 | 3.95071  | 7.79E-05 | 0.00032  | 464.0259 | 440.6665 | 422.3089 | 627.2277 | 744.4105 | 600.9777 |
| 20719 | AMY2A     | 17.52274 | 0.566771 | 0.618837 | 0.915863 | 0.359739 | 0.461588 | 9.757555 | 17.51718 | 14.61036 | 26.78552 | 21.39111 | 15.07469 |
| 13499 | HMGN5     | 122.3364 | 0.566698 | 0.268919 | 2.10732  | 0.03509  | 0.069106 | 99.20181 | 122.0728 | 74.44326 | 151.7846 | 134.764  | 151.7519 |
| 7754  | SPSB3     | 502.5145 | 0.56632  | 0.162884 | 3.476826 | 0.000507 | 0.00174  | 430.4166 | 336.6583 | 450.8339 | 598.21   | 549.7514 | 649.2167 |
| 3919  | MLEC      | 17113.69 | 0.566268 | 0.104275 | 5.430532 | 5.62E-08 | 3.81E-07 | 13397.12 | 15301.26 | 12698.49 | 19794.5  | 19311.89 | 22178.89 |
| 17919 | LOC119621 | 39.14321 | 0.56619  | 0.417004 | 1.357756 | 0.174541 | 0.258953 | 36.86187 | 31.20247 | 25.74206 | 55.80317 | 47.06043 | 38.18922 |
| 4526  | HLTF      | 17039.03 | 0.565761 | 0.113185 | 4.998558 | 5.78E-0  |          |          |          |          |          |          |          |



|       |           |          |          |          |          |          |          |          |          |          |          |          |          |
|-------|-----------|----------|----------|----------|----------|----------|----------|----------|----------|----------|----------|----------|----------|
| 4281  | BTD       | 1695.987 | 0.565088 | 0.109366 | 5.166931 | 2.38E-07 | 1.48E-06 | 1415.93  | 1270.543 | 1422.075 | 1991.057 | 1899.53  | 2176.786 |
| 13341 | LOC119622 | 115.9679 | 0.564971 | 0.264081 | 2.139383 | 0.032405 | 0.064574 | 107.8752 | 81.56436 | 91.14081 | 113.8385 | 164.7115 | 136.6772 |
| 3690  | ATP2C1    | 4057.505 | 0.564952 | 0.099996 | 5.649752 | 1.61E-08 | 1.16E-07 | 3192.347 | 3575.147 | 3054.261 | 4685.235 | 4748.826 | 5089.216 |
| 17385 | GCKR      | 52.46983 | 0.564818 | 0.394601 | 1.431365 | 0.152326 | 0.232935 | 37.94605 | 38.31883 | 49.39693 | 87.05295 | 59.8951  | 42.20914 |
| 3525  | SLC30A7   | 4463.603 | 0.56451  | 0.096777 | 5.83308  | 5.44E-09 | 4.10E-08 | 3595.659 | 3857.611 | 3352.729 | 5044.607 | 5390.559 | 5540.452 |
| 23753 | TRAPPC3L  | 4.418422 | 0.564427 | 1.271111 | 0.444042 | 0.657012 | 0.73526  | 3.794605 | 1.642235 | 6.261582 | 11.16063 | 0        | 6.029877 |
| 23745 | LOC119622 | 4.440986 | 0.564385 | 1.26748  | 0.445281 | 0.656116 | 0.734591 | 5.96295  | 1.642235 | 2.782925 | 6.696381 | 8.556443 | 1.004979 |
| 7188  | NUCB2     | 4141.332 | 0.564307 | 0.153779 | 3.669592 | 0.000243 | 0.000898 | 2844.869 | 4324.553 | 2853.194 | 4962.018 | 5168.091 | 4695.264 |
| 18448 | LOC103222 | 35.57335 | 0.563725 | 0.448452 | 1.257045 | 0.208737 | 0.300807 | 27.6464  | 37.77142 | 20.17621 | 46.87467 | 42.78221 | 38.18922 |
| 6477  | AMER1     | 569.8872 | 0.56367  | 0.142756 | 3.948479 | 7.86E-05 | 0.000323 | 419.0328 | 501.9766 | 461.2699 | 680.7987 | 624.6203 | 731.6251 |
| 6587  | PDE3A     | 576.8958 | 0.563619 | 0.14431  | 3.905609 | 9.40E-05 | 0.000379 | 448.8475 | 503.0715 | 448.7467 | 649.549  | 635.3159 | 775.8442 |
| 13008 | LOC103212 | 99.6795  | 0.563521 | 0.255852 | 2.202528 | 0.027628 | 0.056465 | 78.06044 | 79.37471 | 84.1835  | 116.0706 | 119.7902 | 120.5975 |
| 16236 | CLDN23    | 54.96901 | 0.563137 | 0.34771  | 1.619558 | 0.105327 | 0.172464 | 49.32986 | 38.86624 | 44.52681 | 75.89232 | 59.8951  | 61.30375 |
| 22579 | TCP11     | 8.003414 | 0.563118 | 0.897372 | 0.627519 | 0.530319 | 0.624409 | 7.589209 | 3.284471 | 8.348776 | 8.928508 | 12.83466 | 7.034856 |
| 8691  | CDKL3     | 254.608  | 0.56299  | 0.175629 | 3.205559 | 0.001348 | 0.004122 | 210.3295 | 208.5639 | 196.892  | 285.7123 | 333.7013 | 292.449  |
| 6018  | ANKRD54   | 678.4376 | 0.562935 | 0.135398 | 4.157643 | 3.22E-05 | 0.000142 | 534.4972 | 565.4764 | 546.8449 | 819.1906 | 710.1847 | 894.4317 |
| 5596  | MBNL2     | 2414.11  | 0.562831 | 0.128647 | 4.375011 | 1.21E-05 | 5.77E-05 | 1755.818 | 2327.595 | 1763.679 | 2935.247 | 2780.844 | 2921.475 |
| 8640  | MXD3      | 416.2995 | 0.562749 | 0.174894 | 3.217655 | 0.001292 | 0.003977 | 344.7669 | 279.18   | 386.8266 | 506.6928 | 440.6568 | 539.674  |
| 17895 | LOC103242 | 39.84622 | 0.562686 | 0.413084 | 1.362159 | 0.173148 | 0.25727  | 35.7777  | 27.918   | 32.00364 | 60.26743 | 44.92132 | 38.18922 |
| 15002 | LOC119622 | 90.18538 | 0.562562 | 0.306952 | 1.832736 | 0.066842 | 0.11845  | 77.51835 | 65.14201 | 77.92191 | 75.89232 | 106.9555 | 137.6822 |
| 23022 | LOC103222 | 5.930086 | 0.562454 | 1.006582 | 0.558776 | 0.576315 | 0.665508 | 2.710432 | 6.02153  | 5.565851 | 6.696381 | 8.556443 | 6.029877 |
| 21202 | PHYHD1    | 17.45345 | 0.562446 | 0.661917 | 0.849722 | 0.39548  | 0.495888 | 10.29964 | 18.06459 | 13.2189  | 17.85702 | 34.22577 | 11.05477 |
| 15439 | LOC103232 | 93.2159  | 0.562355 | 0.320596 | 1.754093 | 0.079415 | 0.136747 | 60.71367 | 95.79707 | 68.87741 | 145.0883 | 81.28621 | 107.5328 |
| 4489  | PLEC      | 73739.94 | 0.562322 | 0.112101 | 5.016198 | 5.27E-07 | 3.12E-06 | 60149.36 | 54287.92 | 64214.61 | 87307.41 | 77615.99 | 98864.86 |
| 6891  | KLHDC8B   | 534.813  | 0.562254 | 0.148794 | 3.778735 | 0.000158 | 0.000608 | 454.2684 | 386.4727 | 458.487  | 584.8173 | 620.3421 | 704.4906 |
| 5495  | CUTA      | 3741.667 | 0.562158 | 0.127428 | 4.411584 | 1.03E-05 | 4.96E-05 | 3250.35  | 2530.685 | 3288.026 | 4555.771 | 4002.276 | 4822.896 |
| 19218 | LOC103222 | 564.6315 | 0.562156 | 0.48831  | 1.15123  | 0.249638 | 0.34538  | 604.9684 | 205.8268 | 557.9766 | 560.2639 | 624.6203 | 834.133  |
| 25223 | LOC119622 | 1.166551 | 0.561936 | 2.667267 | 0.210679 | 0.833138 | 0.878057 | 1.626259 | 1.094824 | 0        | 0        | 4.278221 | 0        |
| 21252 | LOC103232 | 13.99504 | 0.56192  | 0.667601 | 0.841701 | 0.399955 | 0.500321 | 10.84173 | 10.94824 | 12.52316 | 17.85702 | 10.69555 | 21.10457 |
| 20922 | LOC103232 | 23.50118 | 0.561815 | 0.632863 | 0.887735 | 0.374683 | 0.476099 | 17.34676 | 16.96977 | 21.56767 | 29.01765 | 47.06043 | 9.044815 |
| 24747 | LOC103212 | 1.769595 | 0.5617   | 1.935705 | 0.290178 | 0.77168  | 0.828994 | 2.168345 | 0.547412 | 1.391463 | 2.232127 | 4.278221 | 0        |
| 20304 | LOC119622 | 32.26647 | 0.561426 | 0.574081 | 0.977956 | 0.328096 | 0.429592 | 16.80468 | 48.71965 | 12.52316 | 35.71403 | 40.6431  | 39.1942  |
| 20087 | LOC119622 | 24.93866 | 0.561424 | 0.55316  | 1.014938 | 0.310135 | 0.410462 | 18.43094 | 13.13788 | 28.52499 | 26.78552 | 40.6431  | 22.10955 |
| 4705  | LOC103242 | 6042.946 | 0.561248 | 0.114982 | 4.881182 | 1.05E-06 | 5.96E-06 | 4453.782 | 5681.04  | 4513.209 | 7020.039 | 7046.321 | 7543.376 |
| 4053  | RETREG2   | 3959.553 | 0.560799 | 0.10521  | 5.330287 | 9.81E-08 | 6.43E-07 | 3337.626 | 3119.7   | 3148.184 | 4493.272 | 4372.342 | 5286.192 |
| 4492  | PPP2CB    | 5939.426 | 0.560732 | 0.11181  | 5.015026 | 5.30E-07 | 3.14E-06 | 5325.456 | 4241.347 | 4836.029 | 6908.433 | 6663.33  | 7661.963 |
| 19014 | HES4      | 29.99817 | 0.560723 | 0.474349 | 1.182089 | 0.23717  | 0.331607 | 19.51511 | 24.08612 | 28.52499 | 37.94616 | 42.78221 | 27.13445 |
| 14402 | LOC103232 | 83.5914  | 0.560716 | 0.288589 | 1.942955 | 0.052022 | 0.096028 | 65.59245 | 72.80577 | 63.31155 | 93.74933 | 117.6511 | 88.43819 |
| 23585 | LOC119612 | 4.440722 | 0.560588 | 1.190751 | 0.470786 | 0.637794 | 0.718921 | 5.420864 | 2.189647 | 3.478657 | 2.232127 | 4.278221 | 9.044815 |
| 9360  | KIAA1586  | 325.5094 | 0.560437 | 0.185824 | 3.015959 | 0.002562 | 0.007276 | 250.986  | 303.2661 | 231.6785 | 412.9435 | 423.5439 | 330.6382 |
| 22669 | LOC103242 | 10.11448 | 0.560386 | 0.91577  | 0.611929 | 0.540585 | 0.633969 | 8.131296 | 6.02153  | 9.740239 | 13.39276 | 21.39111 | 2.009959 |
| 4856  | CYFIP2    | 4764.409 | 0.56025  | 0.117323 | 4.775281 | 1.79E-06 | 9.82E-06 | 3727.928 | 4157.045 | 3674.157 | 5392.819 | 5091.083 | 6543.421 |
| 5921  | TUT7      | 4905.137 | 0.560239 | 0.133333 | 4.201809 | 2.65E-05 | 0.000119 | 3477.484 | 4873.06  | 3543.36  | 5787.905 | 5739.234 | 6009.777 |
| 7186  | MAGEE1    | 453.5098 | 0.559787 | 0.152501 | 3.670702 | 0.000242 | 0.000895 | 411.9856 | 335.016  | 353.4315 | 558.0317 | 504.8301 | 557.7636 |
| 24321 | LOC119622 | 2.353574 | 0.559477 | 1.560862 | 0.358441 | 0.720013 | 0.787038 | 2.168345 | 2.737059 | 0.695731 | 2.232127 | 4.278221 | 2.009959 |
| 15552 | PDIA2     | 90.24066 | 0.559391 | 0.322377 | 1.73521  | 0.082704 | 0.141376 | 85.10756 | 49.81448 | 84.1835  | 127.2312 | 85.56443 | 109.5428 |
| 12541 | LOC103232 | 172.4941 | 0.559299 | 0.243725 | 2.294791 | 0.021745 | 0.046096 | 156.663  | 126.4521 | 132.189  | 243.3018 | 224.6066 | 151.7519 |
| 6270  | CD58      | 1013.245 | 0.559046 | 0.1383   | 4.042271 | 5.29E-05 | 0.000224 | 736.6954 | 907.6088 | 809.1356 | 1261.152 | 1317.692 | 1047.189 |
| 7367  | NCOA1     | 1515.128 | 0.558582 | 0.154723 | 3.610215 | 0.000306 | 0.001104 | 1052.732 | 1556.839 | 1065.86  | 1819.183 | 1803.27  | 1792.883 |
| 24392 | LOC119622 | 3.234898 | 0.55841  | 1.604333 | 0.348064 | 0.277792 | 0.793233 | 4.878777 | 2.737059 | 0        | 2.232127 | 8.556443 | 1.004979 |
| 5380  | ATF6B     | 2631.834 | 0.558113 | 0.124733 | 4.474457 | 7.66E-06 | 3.79E-05 | 1902.723 | 2454.595 | 2032.927 | 3127.21  | 2870.687 | 3402.86  |
| 7159  | NLRX1     | 1603.348 | 0.558046 | 0.151741 | 3.677629 | 0.000235 | 0.000874 | 1444.118 | 1063.074 | 1388.68  | 1886.147 | 1632.141 | 2205.93  |
| 5969  | PLEK2     | 583.416  | 0.558013 | 0.133569 | 4.177702 | 2.94E-05 | 0.000131 | 499.8036 | 434.645  | 482.1418 | 714.2806 | 663.1243 | 706.5006 |
| 7283  | LOC103222 | 587.6056 | 0.557966 | 0.153335 | 3.638868 | 0.000274 | 0.001    | 499.8036 | 416.033  | 511.3626 | 607.1385 | 780.7754 | 710.5205 |
| 23325 | LOC119622 | 6.257904 | 0.55793  | 1.093743 | 0.51011  | 0.609974 | 0.695227 | 3.794605 | 6.02153  | 4.87012  | 11.16063 | 10.69555 | 1.004979 |
| 23238 | LOC103232 | 5.045009 | 0.55781  | 1.066002 | 0.523273 | 0.600784 | 0.687316 | 3.254518 | 4.926706 | 4.174388 | 4.464254 | 6.417332 | 7.034856 |
| 19966 | LOC103242 | 23.9379  | 0.557804 | 0.538712 | 1.035438 | 0.300464 | 0.400052 | 18.97302 | 20.80165 | 18.08902 | 17.85702 | 42.78221 | 25.12449 |
| 19967 | LOC119612 | 23.9379  | 0.557804 | 0.538712 | 1.035438 | 0.300464 | 0.400052 | 18.97302 | 20.80165 | 18.08902 | 17.85702 | 42.78221 | 25.12449 |
| 21079 | ADRA2C    | 16.88002 | 0.557775 | 0.642279 | 0.868431 | 0.385158 | 0.485765 | 14.63633 | 9.306001 | 17.39328 | 11.16063 | 25.66933 | 23.11453 |
| 24328 | TRNAQ-CU  | 2.965112 | 0.557256 | 1.558584 | 0.35754  | 0.720688 | 0.787516 | 4.336691 | 1.094824 | 2.087194 | 2.232127 | 0        | 8.039836 |
| 23336 | LOC103232 | 5.375666 | 0.557101 | 1.095257 | 0.508649 | 0.610998 | 0.696066 | 6.505036 | 1.642235 | 4.87012  | 8.928508 | 4.278221 | 6.029877 |
| 5787  | TMEM192   | 736.6261 | 0.557064 | 0.130115 | 4.281305 | 1.86E-05 | 8.54E-05 | 544.2547 | 660.7261 | 583.0229 | 868.2974 | 894.1483 | 869.3072 |
| 24766 | TRNAA-AG  | 1.772257 | 0.556939 | 1.935472 | 0.287754 | 0.773535 | 0.83035  | 0.542086 | 2.189647 | 1.391463 | 2.232127 | 4.278221 | 0        |
| 8568  | EOMES     | 624.2502 | 0.556845 | 0.172002 | 3.237428 | 0.001206 | 0.003742 | 433.6691 | 637.7348 | 443.8766 | 712.0485 | 776.4972 | 741.6748 |
| 14347 | LOC103232 | 98.16397 | 0.556566 | 0.284983 | 1.952982 | 0.050822 | 0.094173 | 76.97626 | 78.8273  | 81.40057 | 154.0168 | 96.25998 | 101.5029 |
| 9170  | ABCD1     | 1012.258 | 0.556353 | 0.181679 | 3.062283 | 0.002197 | 0.006369 | 952.4458 | 599.4159 | 910.0166 | 1171.867 | 1043.886 | 1395.916 |
| 21725 | TRNAL-CAV | 17.22376 | 0.556226 | 0.718656 | 0.773981 | 0.438942 | 0.537136 | 25.47806 | 7.663765 | 9.044508 | 22.32127 | 10.69555 | 28.13943 |
| 21490 | SOX30     | 15.85895 | 0.5558   | 0.68979  | 0.805753 | 0.420385 | 0.520053 | 11.9259  | 6.568942 | 20.17621 | 24.5534  | 12.83466 | 19.09461 |
| 8302  | LRGUK     | 358.7176 | 0.555641 | 0.167746 | 3.312392 | 0.000925 | 0.002962 | 277.0061 | 313.667  | 277.5968 | 433.0326 | 479.1608 | 371.8424 |
| 20439 | NKD2      | 19.31419 | 0.55523  | 0.580769 |          |          |          |          |          |          |          |          |          |



|       |           |          |          |          |          |          |          |          |          |          |          |          |          |
|-------|-----------|----------|----------|----------|----------|----------|----------|----------|----------|----------|----------|----------|----------|
| 12971 | LOC119620 | 119.9171 | 0.554682 | 0.251101 | 2.209003 | 0.027174 | 0.055696 | 100.8281 | 94.15483 | 98.09812 | 145.0883 | 115.512  | 165.8216 |
| 6816  | DIO1      | 406.5921 | 0.554667 | 0.145567 | 3.810381 | 0.000139 | 0.000541 | 323.0835 | 324.0678 | 339.5169 | 484.3716 | 511.2474 | 457.2657 |
| 3702  | DHCR24    | 13034.45 | 0.554406 | 0.098334 | 5.638    | 1.72E-08 | 1.24E-07 | 10795.65 | 10429.84 | 10463.1  | 15055.7  | 14190.86 | 17271.58 |
| 3390  | FKBP9     | 7035.376 | 0.554406 | 0.093145 | 5.952042 | 2.65E-09 | 2.08E-08 | 5638.782 | 6080.65  | 5384.265 | 8182.978 | 8051.613 | 8873.969 |
| 5110  | NAV2      | 1206.447 | 0.554049 | 0.119839 | 4.623273 | 3.78E-06 | 1.97E-05 | 932.3886 | 1084.97  | 916.9739 | 1341.508 | 1467.43  | 1495.409 |
| 10078 | WDR81     | 894.6799 | 0.554023 | 0.194914 | 2.8424   | 0.004478 | 0.011811 | 836.9814 | 529.8946 | 811.2228 | 1113.831 | 829.9749 | 1246.175 |
| 3317  | VPS26C    | 2413.188 | 0.553946 | 0.091933 | 6.025524 | 1.69E-09 | 1.35E-08 | 1989.457 | 1937.838 | 1942.482 | 2834.801 | 2778.705 | 2995.844 |
| 17448 | P2RY2     | 42.57228 | 0.553686 | 0.390296 | 1.418628 | 0.156007 | 0.237704 | 37.40396 | 30.65506 | 34.78657 | 58.0353  | 51.33866 | 43.21412 |
| 3189  | ACBD5     | 3299.139 | 0.553335 | 0.089588 | 6.176415 | 6.56E-10 | 5.47E-09 | 2670.317 | 2765.524 | 2588.816 | 3778.991 | 3938.103 | 4053.082 |
| 4514  | COPB2     | 15554.96 | 0.553071 | 0.110532 | 5.003711 | 5.62E-07 | 3.31E-06 | 11801.76 | 14575.39 | 11452.43 | 18372.64 | 17803.82 | 19323.75 |
| 6935  | ZNF774    | 402.3313 | 0.552805 | 0.146911 | 3.762858 | 0.000168 | 0.000644 | 306.2788 | 347.0591 | 324.9066 | 484.3716 | 477.0217 | 474.3503 |
| 21615 | PLAC8     | 13.62599 | 0.552598 | 0.700856 | 0.788462 | 0.430427 | 0.529396 | 15.7205  | 7.663765 | 9.740239 | 11.16063 | 21.39111 | 16.07967 |
| 3825  | ARMC10    | 4373.212 | 0.552367 | 0.100078 | 5.519367 | 3.40E-08 | 2.36E-07 | 3446.043 | 3915.637 | 3276.895 | 5078.089 | 5234.404 | 5288.202 |
| 5788  | COQ8A     | 1214.304 | 0.552324 | 0.129017 | 4.281018 | 1.86E-05 | 8.55E-05 | 1028.88  | 866.0055 | 1063.773 | 1370.526 | 1364.753 | 1591.887 |
| 4076  | STX1A     | 2530.738 | 0.552129 | 0.103871 | 5.315513 | 1.06E-07 | 6.94E-07 | 2099.501 | 2004.075 | 2059.365 | 2941.943 | 2770.148 | 3309.397 |
| 11872 | LOC119620 | 328.0117 | 0.551975 | 0.226913 | 2.432537 | 0.014993 | 0.033577 | 193.5248 | 361.8392 | 242.8102 | 379.4616 | 391.4573 | 398.9768 |
| 13698 | LOC103240 | 117.6553 | 0.551821 | 0.266791 | 2.068368 | 0.038605 | 0.074925 | 94.32303 | 114.4091 | 77.22618 | 158.481  | 119.7902 | 141.7021 |
| 21309 | LOC119620 | 14.26569 | 0.551588 | 0.663266 | 0.831625 | 0.405621 | 0.506051 | 15.7205  | 9.306001 | 9.740239 | 15.62489 | 17.11289 | 18.08963 |
| 4617  | FAM214B   | 2015.754 | 0.551497 | 0.111709 | 4.936908 | 7.94E-07 | 4.57E-06 | 1697.272 | 1565.598 | 1648.883 | 2256.68  | 2241.788 | 2684.3   |
| 20696 | LOC103210 | 20.592   | 0.551162 | 0.597438 | 0.922543 | 0.356245 | 0.457614 | 20.0572  | 13.13788 | 16.00182 | 33.4819  | 27.80844 | 13.06473 |
| 11292 | TRAPPC2B  | 156.9606 | 0.551106 | 0.215273 | 2.560032 | 0.010466 | 0.024641 | 134.9795 | 117.1461 | 130.7975 | 189.7308 | 171.1289 | 197.981  |
| 26588 | LOC119620 | 0.091235 | 0.551076 | 4.080473 | 0.135052 | 0.892571 | NA       | 0        | 0.547412 | 0        | 0        | 0        | 0        |
| 26629 | LOC119620 | 0.091235 | 0.551076 | 4.080473 | 0.135052 | 0.892571 | NA       | 0        | 0.547412 | 0        | 0        | 0        | 0        |
| 26637 | INSL5     | 0.090348 | 0.551076 | 4.080473 | 0.135052 | 0.892571 | NA       | 0.542086 | 0        | 0        | 0        | 0        | 0        |
| 26647 | ASB17     | 0.091235 | 0.551076 | 4.080473 | 0.135052 | 0.892571 | NA       | 0        | 0.547412 | 0        | 0        | 0        | 0        |
| 26650 | LOC119620 | 0.115955 | 0.551076 | 4.080473 | 0.135052 | 0.892571 | NA       | 0        | 0        | 0.695731 | 0        | 0        | 0        |
| 26655 | LOC103220 | 0.115955 | 0.551076 | 4.080473 | 0.135052 | 0.892571 | NA       | 0        | 0        | 0.695731 | 0        | 0        | 0        |
| 26664 | LOC103240 | 0.091235 | 0.551076 | 4.080473 | 0.135052 | 0.892571 | NA       | 0        | 0.547412 | 0        | 0        | 0        | 0        |
| 26674 | NMUR2     | 0.091235 | 0.551076 | 4.080473 | 0.135052 | 0.892571 | NA       | 0        | 0.547412 | 0        | 0        | 0        | 0        |
| 26688 | LOC119610 | 0.091235 | 0.551076 | 4.080473 | 0.135052 | 0.892571 | NA       | 0        | 0.547412 | 0        | 0        | 0        | 0        |
| 26716 | LOC119610 | 0.115955 | 0.551076 | 4.080473 | 0.135052 | 0.892571 | NA       | 0        | 0        | 0.695731 | 0        | 0        | 0        |
| 26734 | LOC119610 | 0.090348 | 0.551076 | 4.080473 | 0.135052 | 0.892571 | NA       | 0.542086 | 0        | 0        | 0        | 0        | 0        |
| 26754 | LOC119620 | 0.115955 | 0.551076 | 4.080473 | 0.135052 | 0.892571 | NA       | 0        | 0        | 0.695731 | 0        | 0        | 0        |
| 26773 | LOC103230 | 0.091235 | 0.551076 | 4.080473 | 0.135052 | 0.892571 | NA       | 0        | 0.547412 | 0        | 0        | 0        | 0        |
| 26774 | LOC119620 | 0.115955 | 0.551076 | 4.080473 | 0.135052 | 0.892571 | NA       | 0        | 0        | 0.695731 | 0        | 0        | 0        |
| 26779 | LOC119620 | 0.091235 | 0.551076 | 4.080473 | 0.135052 | 0.892571 | NA       | 0        | 0.547412 | 0        | 0        | 0        | 0        |
| 26800 | LOC119620 | 0.115955 | 0.551076 | 4.080473 | 0.135052 | 0.892571 | NA       | 0        | 0        | 0.695731 | 0        | 0        | 0        |
| 26812 | LOC119610 | 0.091235 | 0.551076 | 4.080473 | 0.135052 | 0.892571 | NA       | 0        | 0.547412 | 0        | 0        | 0        | 0        |
| 26852 | TRNAG-GC  | 0.115955 | 0.551076 | 4.080473 | 0.135052 | 0.892571 | NA       | 0        | 0        | 0.695731 | 0        | 0        | 0        |
| 26856 | LOC119620 | 0.091235 | 0.551076 | 4.080473 | 0.135052 | 0.892571 | NA       | 0        | 0.547412 | 0        | 0        | 0        | 0        |
| 26874 | LOC119620 | 0.091235 | 0.551076 | 4.080473 | 0.135052 | 0.892571 | NA       | 0        | 0.547412 | 0        | 0        | 0        | 0        |
| 26939 | IVL       | 0.115955 | 0.551076 | 4.080473 | 0.135052 | 0.892571 | NA       | 0        | 0        | 0.695731 | 0        | 0        | 0        |
| 26946 | LOC119620 | 0.115955 | 0.551076 | 4.080473 | 0.135052 | 0.892571 | NA       | 0        | 0        | 0.695731 | 0        | 0        | 0        |
| 26951 | LOC119620 | 0.090348 | 0.551076 | 4.080473 | 0.135052 | 0.892571 | NA       | 0.542086 | 0        | 0        | 0        | 0        | 0        |
| 26955 | LOC119620 | 0.115955 | 0.551076 | 4.080473 | 0.135052 | 0.892571 | NA       | 0        | 0        | 0.695731 | 0        | 0        | 0        |
| 26978 | LOC119620 | 0.091235 | 0.551076 | 4.080473 | 0.135052 | 0.892571 | NA       | 0        | 0.547412 | 0        | 0        | 0        | 0        |
| 26983 | LOC103210 | 0.091235 | 0.551076 | 4.080473 | 0.135052 | 0.892571 | NA       | 0        | 0.547412 | 0        | 0        | 0        | 0        |
| 26985 | LOC119620 | 0.091235 | 0.551076 | 4.080473 | 0.135052 | 0.892571 | NA       | 0        | 0.547412 | 0        | 0        | 0        | 0        |
| 27021 | TEKT4     | 0.091235 | 0.551076 | 4.080473 | 0.135052 | 0.892571 | NA       | 0        | 0.547412 | 0        | 0        | 0        | 0        |
| 27030 | SCGB1A1   | 0.090348 | 0.551076 | 4.080473 | 0.135052 | 0.892571 | NA       | 0.542086 | 0        | 0        | 0        | 0        | 0        |
| 27082 | LOC103230 | 0.091235 | 0.551076 | 4.080473 | 0.135052 | 0.892571 | NA       | 0        | 0.547412 | 0        | 0        | 0        | 0        |
| 27097 | LOC119620 | 0.091235 | 0.551076 | 4.080473 | 0.135052 | 0.892571 | NA       | 0        | 0.547412 | 0        | 0        | 0        | 0        |
| 27100 | LOC119620 | 0.091235 | 0.551076 | 4.080473 | 0.135052 | 0.892571 | NA       | 0        | 0.547412 | 0        | 0        | 0        | 0        |
| 27139 | LOC119620 | 0.090348 | 0.551076 | 4.080473 | 0.135052 | 0.892571 | NA       | 0.542086 | 0        | 0        | 0        | 0        | 0        |
| 27144 | LOC119620 | 0.091235 | 0.551076 | 4.080473 | 0.135052 | 0.892571 | NA       | 0        | 0.547412 | 0        | 0        | 0        | 0        |
| 27223 | LOC119620 | 0.115955 | 0.551076 | 4.080473 | 0.135052 | 0.892571 | NA       | 0        | 0        | 0.695731 | 0        | 0        | 0        |
| 27230 | LOC119620 | 0.090348 | 0.551076 | 4.080473 | 0.135052 | 0.892571 | NA       | 0.542086 | 0        | 0        | 0        | 0        | 0        |
| 27239 | LOC103210 | 0.115955 | 0.551076 | 4.080473 | 0.135052 | 0.892571 | NA       | 0        | 0        | 0.695731 | 0        | 0        | 0        |
| 27242 | LOC119620 | 0.090348 | 0.551076 | 4.080473 | 0.135052 | 0.892571 | NA       | 0.542086 | 0        | 0        | 0        | 0        | 0        |
| 27244 | LOC119620 | 0.115955 | 0.551076 | 4.080473 | 0.135052 | 0.892571 | NA       | 0        | 0        | 0.695731 | 0        | 0        | 0        |
| 27246 | LOC119620 | 0.091235 | 0.551076 | 4.080473 | 0.135052 | 0.892571 | NA       | 0        | 0.547412 | 0        | 0        | 0        | 0        |
| 27263 | LOC119620 | 0.115955 | 0.551076 | 4.080473 | 0.135052 | 0.892571 | NA       | 0        | 0        | 0.695731 | 0        | 0        | 0        |
| 27264 | LOC119620 | 0.091235 | 0.551076 | 4.080473 | 0.135052 | 0.892571 | NA       | 0        | 0.547412 | 0        | 0        | 0        | 0        |
| 27276 | LOC119620 | 0.115955 | 0.551076 | 4.080473 | 0.135052 | 0.892571 | NA       | 0        | 0        | 0.695731 | 0        | 0        | 0        |
| 27279 | LOC119620 | 0.115955 | 0.551076 | 4.080473 | 0.135052 | 0.892571 | NA       | 0        | 0        | 0.695731 | 0        | 0        | 0        |
| 27323 | LOC119620 | 0.091235 | 0.551076 | 4.080473 | 0.135052 | 0.892571 | NA       | 0        | 0.547412 | 0        | 0        | 0        | 0        |
| 27324 | LOC119620 | 0.091235 | 0.551076 | 4.080473 | 0.135052 | 0.892571 | NA       | 0        | 0.547412 | 0        | 0        | 0        | 0        |
| 27327 | LOC119620 | 0.090348 | 0.551076 | 4.080473 | 0.135052 | 0.892571 | NA       | 0.542086 | 0        | 0        | 0        | 0        | 0        |
| 27404 | LOC119620 | 0.115955 | 0.551076 | 4.080473 | 0.135052 | 0.892571 | NA       | 0        | 0        | 0.695731 | 0        | 0        | 0        |
| 27433 | LOC119620 | 0.090348 | 0.551076 | 4.080473 | 0.135052 | 0.892571 | NA       | 0.542086 | 0        | 0        | 0        | 0        | 0        |
| 27503 | LOC119620 | 0.091235 | 0.551076 | 4.080473 | 0.135052 | 0.892571 | NA       | 0        | 0.547412 | 0        | 0        | 0        | 0        |
| 27532 | LINC02873 | 0.090348 | 0.551076 | 4.080473 | 0.135052 | 0.892571 | NA       | 0.542086 | 0        | 0        | 0        | 0        | 0        |
| 27574 | LOC119620 | 0.115955 | 0.551076 | 4.080473 | 0.135052 | 0.892571 | NA       | 0        | 0        | 0.695731 | 0        | 0        | 0        |
| 27581 | LOC103240 | 0.115955 | 0.551076 | 4.080473 | 0.135052 | 0.892571 | NA       | 0        | 0        | 0.695731 | 0        | 0        | 0        |



|       |           |          |          |          |          |          |    |          |          |          |   |   |   |
|-------|-----------|----------|----------|----------|----------|----------|----|----------|----------|----------|---|---|---|
| 27613 | LOC11962f | 0.115955 | 0.551076 | 4.080473 | 0.135052 | 0.892571 | NA | 0        | 0        | 0.695731 | 0 | 0 | 0 |
| 27614 | LOC11962f | 0.115955 | 0.551076 | 4.080473 | 0.135052 | 0.892571 | NA | 0        | 0        | 0.695731 | 0 | 0 | 0 |
| 27632 | TRNAQ-UL  | 0.091235 | 0.551076 | 4.080473 | 0.135052 | 0.892571 | NA | 0        | 0.547412 | 0        | 0 | 0 | 0 |
| 27638 | TRNAY-GU  | 0.091235 | 0.551076 | 4.080473 | 0.135052 | 0.892571 | NA | 0        | 0.547412 | 0        | 0 | 0 | 0 |
| 27663 | TRNAA-AG  | 0.091235 | 0.551076 | 4.080473 | 0.135052 | 0.892571 | NA | 0        | 0.547412 | 0        | 0 | 0 | 0 |
| 27674 | MHC-DPA1  | 0.090348 | 0.551076 | 4.080473 | 0.135052 | 0.892571 | NA | 0.542086 | 0        | 0        | 0 | 0 | 0 |
| 27675 | SMIM40    | 0.091235 | 0.551076 | 4.080473 | 0.135052 | 0.892571 | NA | 0        | 0.547412 | 0        | 0 | 0 | 0 |
| 27679 | LOC11962f | 0.115955 | 0.551076 | 4.080473 | 0.135052 | 0.892571 | NA | 0        | 0        | 0.695731 | 0 | 0 | 0 |
| 27691 | LOC11962f | 0.115955 | 0.551076 | 4.080473 | 0.135052 | 0.892571 | NA | 0        | 0        | 0.695731 | 0 | 0 | 0 |
| 27694 | LOC11962f | 0.115955 | 0.551076 | 4.080473 | 0.135052 | 0.892571 | NA | 0        | 0        | 0.695731 | 0 | 0 | 0 |
| 27695 | DEFB114   | 0.091235 | 0.551076 | 4.080473 | 0.135052 | 0.892571 | NA | 0        | 0.547412 | 0        | 0 | 0 | 0 |
| 27716 | LOC11962f | 0.115955 | 0.551076 | 4.080473 | 0.135052 | 0.892571 | NA | 0        | 0        | 0.695731 | 0 | 0 | 0 |
| 27726 | LOC11962f | 0.115955 | 0.551076 | 4.080473 | 0.135052 | 0.892571 | NA | 0        | 0        | 0.695731 | 0 | 0 | 0 |
| 27749 | LOC11962f | 0.115955 | 0.551076 | 4.080473 | 0.135052 | 0.892571 | NA | 0        | 0        | 0.695731 | 0 | 0 | 0 |
| 27759 | LOC11962f | 0.091235 | 0.551076 | 4.080473 | 0.135052 | 0.892571 | NA | 0        | 0.547412 | 0        | 0 | 0 | 0 |
| 27770 | LOC11962f | 0.091235 | 0.551076 | 4.080473 | 0.135052 | 0.892571 | NA | 0        | 0.547412 | 0        | 0 | 0 | 0 |
| 27868 | LOC11962f | 0.091235 | 0.551076 | 4.080473 | 0.135052 | 0.892571 | NA | 0        | 0.547412 | 0        | 0 | 0 | 0 |
| 27893 | LOC11962f | 0.115955 | 0.551076 | 4.080473 | 0.135052 | 0.892571 | NA | 0        | 0        | 0.695731 | 0 | 0 | 0 |
| 27901 | LOC11962f | 0.115955 | 0.551076 | 4.080473 | 0.135052 | 0.892571 | NA | 0        | 0        | 0.695731 | 0 | 0 | 0 |
| 27906 | LOC10321f | 0.115955 | 0.551076 | 4.080473 | 0.135052 | 0.892571 | NA | 0        | 0        | 0.695731 | 0 | 0 | 0 |
| 27908 | LOC11962f | 0.091235 | 0.551076 | 4.080473 | 0.135052 | 0.892571 | NA | 0        | 0.547412 | 0        | 0 | 0 | 0 |
| 27911 | CUNH10or  | 0.091235 | 0.551076 | 4.080473 | 0.135052 | 0.892571 | NA | 0        | 0.547412 | 0        | 0 | 0 | 0 |
| 27932 | MBL2      | 0.115955 | 0.551076 | 4.080473 | 0.135052 | 0.892571 | NA | 0        | 0        | 0.695731 | 0 | 0 | 0 |
| 27935 | LOC11962f | 0.091235 | 0.551076 | 4.080473 | 0.135052 | 0.892571 | NA | 0        | 0.547412 | 0        | 0 | 0 | 0 |
| 27951 | LOC11962f | 0.115955 | 0.551076 | 4.080473 | 0.135052 | 0.892571 | NA | 0        | 0        | 0.695731 | 0 | 0 | 0 |
| 27954 | LOC11962f | 0.115955 | 0.551076 | 4.080473 | 0.135052 | 0.892571 | NA | 0        | 0        | 0.695731 | 0 | 0 | 0 |
| 28007 | LOC11961f | 0.091235 | 0.551076 | 4.080473 | 0.135052 | 0.892571 | NA | 0        | 0.547412 | 0        | 0 | 0 | 0 |
| 28017 | LOC11961f | 0.091235 | 0.551076 | 4.080473 | 0.135052 | 0.892571 | NA | 0        | 0.547412 | 0        | 0 | 0 | 0 |
| 28029 | LOC11961f | 0.091235 | 0.551076 | 4.080473 | 0.135052 | 0.892571 | NA | 0        | 0.547412 | 0        | 0 | 0 | 0 |
| 28051 | LOC11961f | 0.115955 | 0.551076 | 4.080473 | 0.135052 | 0.892571 | NA | 0        | 0        | 0.695731 | 0 | 0 | 0 |
| 28067 | LOC11961f | 0.091235 | 0.551076 | 4.080473 | 0.135052 | 0.892571 | NA | 0        | 0.547412 | 0        | 0 | 0 | 0 |
| 28188 | LOC11961f | 0.115955 | 0.551076 | 4.080473 | 0.135052 | 0.892571 | NA | 0        | 0        | 0.695731 | 0 | 0 | 0 |
| 28189 | LOC11961f | 0.115955 | 0.551076 | 4.080473 | 0.135052 | 0.892571 | NA | 0        | 0        | 0.695731 | 0 | 0 | 0 |
| 28235 | LOC11961f | 0.090348 | 0.551076 | 4.080473 | 0.135052 | 0.892571 | NA | 0.542086 | 0        | 0        | 0 | 0 | 0 |
| 28238 | LOC11961f | 0.091235 | 0.551076 | 4.080473 | 0.135052 | 0.892571 | NA | 0        | 0.547412 | 0        | 0 | 0 | 0 |
| 28249 | LOC11961f | 0.090348 | 0.551076 | 4.080473 | 0.135052 | 0.892571 | NA | 0.542086 | 0        | 0        | 0 | 0 | 0 |
| 28257 | LOC10321f | 0.091235 | 0.551076 | 4.080473 | 0.135052 | 0.892571 | NA | 0        | 0.547412 | 0        | 0 | 0 | 0 |
| 28264 | LOC11961f | 0.091235 | 0.551076 | 4.080473 | 0.135052 | 0.892571 | NA | 0        | 0.547412 | 0        | 0 | 0 | 0 |
| 28266 | LOC11961f | 0.090348 | 0.551076 | 4.080473 | 0.135052 | 0.892571 | NA | 0.542086 | 0        | 0        | 0 | 0 | 0 |
| 28270 | LOC10321f | 0.091235 | 0.551076 | 4.080473 | 0.135052 | 0.892571 | NA | 0        | 0.547412 | 0        | 0 | 0 | 0 |
| 28288 | LOC10322f | 0.091235 | 0.551076 | 4.080473 | 0.135052 | 0.892571 | NA | 0        | 0.547412 | 0        | 0 | 0 | 0 |
| 28305 | TMEM52    | 0.115955 | 0.551076 | 4.080473 | 0.135052 | 0.892571 | NA | 0        | 0        | 0.695731 | 0 | 0 | 0 |
| 28316 | LOC11961f | 0.091235 | 0.551076 | 4.080473 | 0.135052 | 0.892571 | NA | 0        | 0.547412 | 0        | 0 | 0 | 0 |
| 28320 | LOC11961f | 0.115955 | 0.551076 | 4.080473 | 0.135052 | 0.892571 | NA | 0        | 0        | 0.695731 | 0 | 0 | 0 |
| 28325 | LOC11961f | 0.115955 | 0.551076 | 4.080473 | 0.135052 | 0.892571 | NA | 0        | 0        | 0.695731 | 0 | 0 | 0 |
| 28326 | LOC11961f | 0.115955 | 0.551076 | 4.080473 | 0.135052 | 0.892571 | NA | 0        | 0        | 0.695731 | 0 | 0 | 0 |
| 28327 | LOC11961f | 0.115955 | 0.551076 | 4.080473 | 0.135052 | 0.892571 | NA | 0        | 0        | 0.695731 | 0 | 0 | 0 |
| 28363 | LOC11961f | 0.090348 | 0.551076 | 4.080473 | 0.135052 | 0.892571 | NA | 0.542086 | 0        | 0        | 0 | 0 | 0 |
| 28381 | LOC11961f | 0.091235 | 0.551076 | 4.080473 | 0.135052 | 0.892571 | NA | 0        | 0.547412 | 0        | 0 | 0 | 0 |
| 28423 | LOC10323f | 0.091235 | 0.551076 | 4.080473 | 0.135052 | 0.892571 | NA | 0        | 0.547412 | 0        | 0 | 0 | 0 |
| 28430 | LOC10323f | 0.115955 | 0.551076 | 4.080473 | 0.135052 | 0.892571 | NA | 0        | 0        | 0.695731 | 0 | 0 | 0 |
| 28433 | LOC11961f | 0.115955 | 0.551076 | 4.080473 | 0.135052 | 0.892571 | NA | 0        | 0        | 0.695731 | 0 | 0 | 0 |
| 28440 | LOC11962f | 0.091235 | 0.551076 | 4.080473 | 0.135052 | 0.892571 | NA | 0        | 0.547412 | 0        | 0 | 0 | 0 |
| 28454 | LOC11962f | 0.091235 | 0.551076 | 4.080473 | 0.135052 | 0.892571 | NA | 0        | 0.547412 | 0        | 0 | 0 | 0 |
| 28463 | LOC10323f | 0.091235 | 0.551076 | 4.080473 | 0.135052 | 0.892571 | NA | 0        | 0.547412 | 0        | 0 | 0 | 0 |
| 28474 | LOC11962f | 0.091235 | 0.551076 | 4.080473 | 0.135052 | 0.892571 | NA | 0        | 0.547412 | 0        | 0 | 0 | 0 |
| 28476 | LOC10321f | 0.115955 | 0.551076 | 4.080473 | 0.135052 | 0.892571 | NA | 0        | 0        | 0.695731 | 0 | 0 | 0 |
| 28488 | LOC11962f | 0.091235 | 0.551076 | 4.080473 | 0.135052 | 0.892571 | NA | 0        | 0.547412 | 0        | 0 | 0 | 0 |
| 28495 | LOC10321f | 0.091235 | 0.551076 | 4.080473 | 0.135052 | 0.892571 | NA | 0        | 0.547412 | 0        | 0 | 0 | 0 |
| 28533 | LOC11962f | 0.091235 | 0.551076 | 4.080473 | 0.135052 | 0.892571 | NA | 0        | 0.547412 | 0        | 0 | 0 | 0 |
| 28544 | LOC10324f | 0.115955 | 0.551076 | 4.080473 | 0.135052 | 0.892571 | NA | 0        | 0        | 0.695731 | 0 | 0 | 0 |
| 28561 | LOC10323f | 0.091235 | 0.551076 | 4.080473 | 0.135052 | 0.892571 | NA | 0        | 0.547412 | 0        | 0 | 0 | 0 |
| 28563 | LOC11962f | 0.115955 | 0.551076 | 4.080473 | 0.135052 | 0.892571 | NA | 0        | 0        | 0.695731 | 0 | 0 | 0 |
| 28577 | LOC10323f | 0.091235 | 0.551076 | 4.080473 | 0.135052 | 0.892571 | NA | 0        | 0.547412 | 0        | 0 | 0 | 0 |
| 28581 | LOC10323f | 0.115955 | 0.551076 | 4.080473 | 0.135052 | 0.892571 | NA | 0        | 0        | 0.695731 | 0 | 0 | 0 |
| 28589 | LOC11962f | 0.115955 | 0.551076 | 4.080473 | 0.135052 | 0.892571 | NA | 0        | 0        | 0.695731 | 0 | 0 | 0 |
| 28658 | LOC11962f | 0.090348 | 0.551076 | 4.080473 | 0.135052 | 0.892571 | NA | 0.542086 | 0        | 0        | 0 | 0 | 0 |
| 28667 | LOC10322f | 0.090348 | 0.551076 | 4.080473 | 0.135052 | 0.892571 | NA | 0.542086 | 0        | 0        | 0 | 0 | 0 |
| 28674 | LOC11962f | 0.091235 | 0.551076 | 4.080473 | 0.135052 | 0.892571 | NA | 0        | 0.547412 | 0        | 0 | 0 | 0 |
| 28678 | LOC11962f | 0.115955 | 0.551076 | 4.080473 | 0.135052 | 0.892571 | NA | 0        | 0        | 0.695731 | 0 | 0 | 0 |
| 28701 | LOC10323f | 0.091235 | 0.551076 | 4.080473 | 0.135052 | 0.892571 | NA | 0        | 0.547412 | 0        | 0 | 0 | 0 |
| 28705 | LOC11962f | 0.115955 | 0.551076 | 4.080473 | 0.135052 | 0.892571 | NA | 0        | 0        | 0.695731 | 0 | 0 | 0 |
| 28712 | LOC11962f | 0.091235 | 0.551076 | 4.080473 | 0.135052 | 0.892571 | NA | 0        | 0.547412 | 0        | 0 | 0 | 0 |
| 28725 | LOC11962f | 0.115955 | 0.551076 | 4.080473 | 0.135052 | 0.892571 | NA | 0        | 0        | 0.695731 | 0 | 0 | 0 |



|       |           |          |          |          |          |          |          |          |          |          |          |          |          |
|-------|-----------|----------|----------|----------|----------|----------|----------|----------|----------|----------|----------|----------|----------|
| 28730 | BRS3      | 0.115955 | 0.551076 | 4.080473 | 0.135052 | 0.892571 | NA       | 0        | 0        | 0.695731 | 0        | 0        | 0        |
| 28734 | LOC119622 | 0.090348 | 0.551076 | 4.080473 | 0.135052 | 0.892571 | NA       | 0.542086 | 0        | 0        | 0        | 0        | 0        |
| 28738 | LOC119620 | 0.115955 | 0.551076 | 4.080473 | 0.135052 | 0.892571 | NA       | 0        | 0        | 0.695731 | 0        | 0        | 0        |
| 28739 | LOC119620 | 0.091235 | 0.551076 | 4.080473 | 0.135052 | 0.892571 | NA       | 0        | 0.547412 | 0        | 0        | 0        | 0        |
| 28744 | ARHGAP4   | 0.091235 | 0.551076 | 4.080473 | 0.135052 | 0.892571 | NA       | 0        | 0.547412 | 0        | 0        | 0        | 0        |
| 28764 | LOC119621 | 0.091235 | 0.551076 | 4.080473 | 0.135052 | 0.892571 | NA       | 0        | 0.547412 | 0        | 0        | 0        | 0        |
| 28794 | TRNAI-UAI | 0.115955 | 0.551076 | 4.080473 | 0.135052 | 0.892571 | NA       | 0        | 0        | 0.695731 | 0        | 0        | 0        |
| 28796 | LOC119621 | 0.090348 | 0.551076 | 4.080473 | 0.135052 | 0.892571 | NA       | 0.542086 | 0        | 0        | 0        | 0        | 0        |
| 28810 | LOC103228 | 0.091235 | 0.551076 | 4.080473 | 0.135052 | 0.892571 | NA       | 0        | 0.547412 | 0        | 0        | 0        | 0        |
| 28814 | LOC119621 | 0.091235 | 0.551076 | 4.080473 | 0.135052 | 0.892571 | NA       | 0        | 0.547412 | 0        | 0        | 0        | 0        |
| 28820 | LOC119621 | 0.091235 | 0.551076 | 4.080473 | 0.135052 | 0.892571 | NA       | 0        | 0.547412 | 0        | 0        | 0        | 0        |
| 28842 | TAS2R20   | 0.090348 | 0.551076 | 4.080473 | 0.135052 | 0.892571 | NA       | 0.542086 | 0        | 0        | 0        | 0        | 0        |
| 28851 | LOC119621 | 0.115955 | 0.551076 | 4.080473 | 0.135052 | 0.892571 | NA       | 0        | 0        | 0.695731 | 0        | 0        | 0        |
| 28866 | LOC119621 | 0.091235 | 0.551076 | 4.080473 | 0.135052 | 0.892571 | NA       | 0        | 0.547412 | 0        | 0        | 0        | 0        |
| 28925 | LOC119621 | 0.091235 | 0.551076 | 4.080473 | 0.135052 | 0.892571 | NA       | 0        | 0.547412 | 0        | 0        | 0        | 0        |
| 28927 | LOC119621 | 0.090348 | 0.551076 | 4.080473 | 0.135052 | 0.892571 | NA       | 0.542086 | 0        | 0        | 0        | 0        | 0        |
| 28941 | OVOL3     | 0.115955 | 0.551076 | 4.080473 | 0.135052 | 0.892571 | NA       | 0        | 0        | 0.695731 | 0        | 0        | 0        |
| 28943 | LOC119621 | 0.091235 | 0.551076 | 4.080473 | 0.135052 | 0.892571 | NA       | 0        | 0.547412 | 0        | 0        | 0        | 0        |
| 28961 | LOC103234 | 0.091235 | 0.551076 | 4.080473 | 0.135052 | 0.892571 | NA       | 0        | 0.547412 | 0        | 0        | 0        | 0        |
| 28973 | CCL4L2    | 0.091235 | 0.551076 | 4.080473 | 0.135052 | 0.892571 | NA       | 0        | 0.547412 | 0        | 0        | 0        | 0        |
| 28977 | LOC119621 | 0.115955 | 0.551076 | 4.080473 | 0.135052 | 0.892571 | NA       | 0        | 0        | 0.695731 | 0        | 0        | 0        |
| 29012 | LOC119621 | 0.091235 | 0.551076 | 4.080473 | 0.135052 | 0.892571 | NA       | 0        | 0.547412 | 0        | 0        | 0        | 0        |
| 29028 | LOC103241 | 0.115955 | 0.551076 | 4.080473 | 0.135052 | 0.892571 | NA       | 0        | 0        | 0.695731 | 0        | 0        | 0        |
| 29039 | LOC119621 | 0.115955 | 0.551076 | 4.080473 | 0.135052 | 0.892571 | NA       | 0        | 0        | 0.695731 | 0        | 0        | 0        |
| 29048 | KRTAP16-1 | 0.091235 | 0.551076 | 4.080473 | 0.135052 | 0.892571 | NA       | 0        | 0.547412 | 0        | 0        | 0        | 0        |
| 29066 | LOC119621 | 0.115955 | 0.551076 | 4.080473 | 0.135052 | 0.892571 | NA       | 0        | 0        | 0.695731 | 0        | 0        | 0        |
| 29072 | LOC119621 | 0.115955 | 0.551076 | 4.080473 | 0.135052 | 0.892571 | NA       | 0        | 0        | 0.695731 | 0        | 0        | 0        |
| 29074 | LOC119621 | 0.091235 | 0.551076 | 4.080473 | 0.135052 | 0.892571 | NA       | 0        | 0.547412 | 0        | 0        | 0        | 0        |
| 29103 | LOC119621 | 0.115955 | 0.551076 | 4.080473 | 0.135052 | 0.892571 | NA       | 0        | 0        | 0.695731 | 0        | 0        | 0        |
| 29104 | LOC103241 | 0.115955 | 0.551076 | 4.080473 | 0.135052 | 0.892571 | NA       | 0        | 0        | 0.695731 | 0        | 0        | 0        |
| 29136 | LOC119621 | 0.091235 | 0.551076 | 4.080473 | 0.135052 | 0.892571 | NA       | 0        | 0.547412 | 0        | 0        | 0        | 0        |
| 29137 | LOC103231 | 0.090348 | 0.551076 | 4.080473 | 0.135052 | 0.892571 | NA       | 0.542086 | 0        | 0        | 0        | 0        | 0        |
| 29140 | LOC119621 | 0.115955 | 0.551076 | 4.080473 | 0.135052 | 0.892571 | NA       | 0        | 0        | 0.695731 | 0        | 0        | 0        |
| 29154 | LOC119621 | 0.090348 | 0.551076 | 4.080473 | 0.135052 | 0.892571 | NA       | 0.542086 | 0        | 0        | 0        | 0        | 0        |
| 29193 | LOC119621 | 0.115955 | 0.551076 | 4.080473 | 0.135052 | 0.892571 | NA       | 0        | 0        | 0.695731 | 0        | 0        | 0        |
| 29194 | LOC119621 | 0.115955 | 0.551076 | 4.080473 | 0.135052 | 0.892571 | NA       | 0        | 0        | 0.695731 | 0        | 0        | 0        |
| 29252 | LOC119621 | 0.115955 | 0.551076 | 4.080473 | 0.135052 | 0.892571 | NA       | 0        | 0        | 0.695731 | 0        | 0        | 0        |
| 29289 | LOC119621 | 0.115955 | 0.551076 | 4.080473 | 0.135052 | 0.892571 | NA       | 0        | 0        | 0.695731 | 0        | 0        | 0        |
| 29290 | LOC119621 | 0.090348 | 0.551076 | 4.080473 | 0.135052 | 0.892571 | NA       | 0.542086 | 0        | 0        | 0        | 0        | 0        |
| 29301 | LOC103231 | 0.115955 | 0.551076 | 4.080473 | 0.135052 | 0.892571 | NA       | 0        | 0        | 0.695731 | 0        | 0        | 0        |
| 29340 | LOC119621 | 0.090348 | 0.551076 | 4.080473 | 0.135052 | 0.892571 | NA       | 0.542086 | 0        | 0        | 0        | 0        | 0        |
| 29351 | LOC119621 | 0.115955 | 0.551076 | 4.080473 | 0.135052 | 0.892571 | NA       | 0        | 0        | 0.695731 | 0        | 0        | 0        |
| 29383 | LOC119621 | 0.090348 | 0.551076 | 4.080473 | 0.135052 | 0.892571 | NA       | 0.542086 | 0        | 0        | 0        | 0        | 0        |
| 29388 | DGKQ      | 0.115955 | 0.551076 | 4.080473 | 0.135052 | 0.892571 | NA       | 0        | 0        | 0.695731 | 0        | 0        | 0        |
| 29397 | LOC119621 | 0.090348 | 0.551076 | 4.080473 | 0.135052 | 0.892571 | NA       | 0.542086 | 0        | 0        | 0        | 0        | 0        |
| 29401 | LOC103231 | 0.090348 | 0.551076 | 4.080473 | 0.135052 | 0.892571 | NA       | 0.542086 | 0        | 0        | 0        | 0        | 0        |
| 29414 | LOC103231 | 0.090348 | 0.551076 | 4.080473 | 0.135052 | 0.892571 | NA       | 0.542086 | 0        | 0        | 0        | 0        | 0        |
| 29423 | LOC119621 | 0.091235 | 0.551076 | 4.080473 | 0.135052 | 0.892571 | NA       | 0        | 0.547412 | 0        | 0        | 0        | 0        |
| 29486 | LOC119621 | 0.115955 | 0.551076 | 4.080473 | 0.135052 | 0.892571 | NA       | 0        | 0        | 0.695731 | 0        | 0        | 0        |
| 29495 | LOC119621 | 0.091235 | 0.551076 | 4.080473 | 0.135052 | 0.892571 | NA       | 0        | 0.547412 | 0        | 0        | 0        | 0        |
| 29517 | TRNAK-UU  | 0.090348 | 0.551076 | 4.080473 | 0.135052 | 0.892571 | NA       | 0.542086 | 0        | 0        | 0        | 0        | 0        |
| 29521 | LOC119621 | 0.091235 | 0.551076 | 4.080473 | 0.135052 | 0.892571 | NA       | 0        | 0.547412 | 0        | 0        | 0        | 0        |
| 29549 | LOC119621 | 0.091235 | 0.551076 | 4.080473 | 0.135052 | 0.892571 | NA       | 0        | 0.547412 | 0        | 0        | 0        | 0        |
| 29554 | LOC119621 | 0.115955 | 0.551076 | 4.080473 | 0.135052 | 0.892571 | NA       | 0        | 0        | 0.695731 | 0        | 0        | 0        |
| 29564 | LOC119621 | 0.091235 | 0.551076 | 4.080473 | 0.135052 | 0.892571 | NA       | 0        | 0.547412 | 0        | 0        | 0        | 0        |
| 29572 | LOC119621 | 0.090348 | 0.551076 | 4.080473 | 0.135052 | 0.892571 | NA       | 0.542086 | 0        | 0        | 0        | 0        | 0        |
| 29583 | LOC119621 | 0.091235 | 0.551076 | 4.080473 | 0.135052 | 0.892571 | NA       | 0        | 0.547412 | 0        | 0        | 0        | 0        |
| 29584 | LOC119621 | 0.115955 | 0.551076 | 4.080473 | 0.135052 | 0.892571 | NA       | 0        | 0        | 0.695731 | 0        | 0        | 0        |
| 29588 | LOC119621 | 0.091235 | 0.551076 | 4.080473 | 0.135052 | 0.892571 | NA       | 0        | 0.547412 | 0        | 0        | 0        | 0        |
| 29602 | LOC119621 | 0.115955 | 0.551076 | 4.080473 | 0.135052 | 0.892571 | NA       | 0        | 0        | 0.695731 | 0        | 0        | 0        |
| 4206  | GALNT12   | 1786.383 | 0.550722 | 0.10564  | 5.213213 | 1.86E-07 | 1.17E-06 | 1495.074 | 1421.628 | 1436.685 | 2091.503 | 1967.982 | 2305.423 |
| 23617 | LOC119628 | 5.11483  | 0.550631 | 1.181133 | 0.466189 | 0.64108  | 0.721616 | 4.878777 | 1.094824 | 6.261582 | 11.16063 | 4.278221 | 3.014938 |
| 22743 | LOC119625 | 8.388721 | 0.550429 | 0.914891 | 0.601633 | 0.547418 | 0.639894 | 4.878777 | 8.758589 | 6.261582 | 17.85702 | 8.556443 | 4.019918 |
| 5890  | GALT      | 1018.257 | 0.550186 | 0.130382 | 4.219788 | 2.45E-05 | 0.00011  | 868.4224 | 770.7558 | 845.3136 | 1171.867 | 1082.39  | 1370.792 |
| 22220 | LOC103231 | 13.54742 | 0.550003 | 0.798422 | 0.688863 | 0.490909 | 0.587346 | 14.63633 | 8.211177 | 10.43597 | 2.232127 | 25.66933 | 20.09959 |
| 9785  | LOC103241 | 219.9319 | 0.54997  | 0.189153 | 2.907534 | 0.003643 | 0.009897 | 174.5518 | 187.7623 | 171.1499 | 285.7123 | 265.2497 | 235.1652 |
| 17166 | LOC119618 | 47.22494 | 0.549942 | 0.373458 | 1.472566 | 0.140868 | 0.218163 | 37.40396 | 42.69812 | 34.78657 | 46.87467 | 66.31243 | 55.27387 |
| 16947 | LOC119626 | 50.10414 | 0.549413 | 0.366347 | 1.499705 | 0.133691 | 0.20972  | 40.11439 | 45.98259 | 35.4823  | 71.42806 | 51.33866 | 56.27885 |
| 10147 | ZNF784    | 231.2824 | 0.549358 | 0.19436  | 2.826496 | 0.004706 | 0.01233  | 172.3835 | 217.8699 | 173.9328 | 270.0874 | 260.9715 | 292.449  |
| 4157  | ATP6V1C1  | 2845.457 | 0.548798 | 0.104502 | 5.251545 | 1.51E-07 | 9.65E-07 | 2313.625 | 2487.439 | 2134.504 | 3218.727 | 3298.509 | 3619.936 |
| 8838  | SAC3D1    | 370.4055 | 0.548698 | 0.173632 | 3.160111 | 0.001577 | 0.004744 | 323.0835 | 255.6413 | 326.298  | 435.2648 | 395.7355 | 486.4101 |
| 17111 | HCN1      | 51.53428 | 0.548691 | 0.370795 | 1.479768 | 0.138935 | 0.215861 | 39.03022 | 52.55153 | 34.09084 | 64.73168 | 53.47777 | 65.32367 |
| 21289 | LPAR3     | 17.49181 | 0.548681 | 0.656488 | 0.835783 | 0.403277 | 0.503599 | 15.17842 | 10.94824 | 16.00182 | 13.39276 | 36.36488 | 13.06473 |
| 3692  | ALDH1A2   | 3260.684 | 0.548569 | 0.09711  | 5.648924 | 1.61E-08 | 1.16E-07 | 2554.311 | 2839.972 | 2553.334 | 3712.027 | 3833.286 | 4071.172 |



|       |           |          |          |          |          |          |          |          |          |          |          |          |          |
|-------|-----------|----------|----------|----------|----------|----------|----------|----------|----------|----------|----------|----------|----------|
| 21665 | LOC103218 | 14.22973 | 0.548074 | 0.701439 | 0.781356 | 0.434593 | 0.533287 | 9.215468 | 17.51718 | 7.653045 | 13.39276 | 23.53022 | 14.06971 |
| 23726 | LOC10323  | 4.162504 | 0.548028 | 1.218976 | 0.44958  | 0.653013 | 0.731702 | 4.878777 | 2.189647 | 2.782925 | 6.696381 | 6.417332 | 2.009959 |
| 18339 | LOC11962  | 35.43327 | 0.547813 | 0.429041 | 1.276832 | 0.201662 | 0.292337 | 23.8518  | 29.01283 | 33.39511 | 37.94616 | 49.19955 | 39.1942  |
| 11948 | PDGFD     | 150.3713 | 0.547689 | 0.22684  | 2.414427 | 0.01576  | 0.035067 | 108.4173 | 129.7366 | 130.1018 | 160.7131 | 173.268  | 199.9909 |
| 17949 | LOC10324  | 38.8199  | 0.547581 | 0.40524  | 1.35125  | 0.176615 | 0.261592 | 29.81475 | 31.74989 | 32.69937 | 55.80317 | 40.6431  | 42.20914 |
| 17430 | LOC11961  | 399162.5 | 0.547288 | 0.384532 | 1.423258 | 0.154662 | 0.235897 | 213675.3 | 507061.5 | 252302.1 | 471141.7 | 490789   | 460005.2 |
| 10397 | ANKRD23   | 239.9871 | 0.547013 | 0.197706 | 2.76806  | 0.005661 | 0.014474 | 227.1342 | 166.4132 | 191.3261 | 265.6231 | 308.0319 | 281.3943 |
| 10440 | LOC10322  | 192.3064 | 0.546933 | 0.198373 | 2.757094 | 0.005832 | 0.01485  | 157.205  | 168.0554 | 142.6249 | 245.534  | 220.3284 | 220.0905 |
| 5119  | SNX33     | 1177.07  | 0.546711 | 0.118337 | 4.61993  | 3.84E-06 | 1.99E-05 | 993.6443 | 882.4278 | 998.3745 | 1354.901 | 1315.553 | 1517.519 |
| 6885  | LOC10323  | 518.6186 | 0.546493 | 0.14447  | 3.782734 | 0.000155 | 0.000599 | 410.3594 | 449.9725 | 407.6986 | 589.2815 | 569.0034 | 685.396  |
| 23260 | LOC11962  | 5.633664 | 0.546212 | 1.048365 | 0.521013 | 0.602357 | 0.688464 | 5.96295  | 5.474118 | 2.087194 | 6.696381 | 8.556443 | 5.024897 |
| 12637 | LOC11962  | 146.7262 | 0.546047 | 0.240244 | 2.272892 | 0.023033 | 0.048455 | 121.9694 | 129.1892 | 105.0554 | 158.481  | 213.9111 | 151.7519 |
| 3719  | MAP7D1    | 4959.08  | 0.545768 | 0.097083 | 5.621663 | 1.89E-08 | 1.35E-07 | 3991.382 | 4001.033 | 4108.989 | 6017.814 | 5319.968 | 6315.291 |
| 22137 | WFIKN1    | 12.73407 | 0.545767 | 0.776794 | 0.702589 | 0.482312 | 0.579239 | 10.84173 | 6.568942 | 13.91463 | 4.464254 | 23.53022 | 17.08465 |
| 9956  | RASSF6    | 243.5267 | 0.545755 | 0.189921 | 2.873593 | 0.004058 | 0.010837 | 200.572  | 206.9217 | 185.0645 | 261.1589 | 340.1186 | 267.3245 |
| 5092  | TDP2      | 927.7832 | 0.545391 | 0.117705 | 4.633548 | 3.59E-06 | 1.88E-05 | 704.7123 | 771.8507 | 784.785  | 1162.938 | 1095.225 | 1047.189 |
| 20072 | LOC11962  | 21.18648 | 0.545287 | 0.536163 | 1.017017 | 0.309145 | 0.409457 | 15.7205  | 15.87494 | 20.17621 | 24.5534  | 25.66933 | 25.12449 |
| 6244  | IL11RA    | 880.2537 | 0.545244 | 0.134517 | 4.05334  | 5.05E-05 | 0.000215 | 776.8098 | 622.4072 | 750.6941 | 1060.26  | 966.878  | 1104.472 |
| 7560  | APOBR     | 1180.623 | 0.5452   | 0.154106 | 3.537817 | 0.000403 | 0.001419 | 851.0756 | 1198.284 | 829.3118 | 1392.847 | 1469.569 | 1342.653 |
| 20779 | LOC11962  | 24.54806 | 0.545178 | 0.601131 | 0.90692  | 0.364449 | 0.466282 | 17.88885 | 30.65506 | 10.43597 | 42.41041 | 27.80844 | 18.08963 |
| 4887  | ZFYVE26   | 2521.8   | 0.544818 | 0.114733 | 4.748579 | 2.05E-06 | 1.11E-05 | 2093.538 | 2013.928 | 2052.408 | 2984.354 | 2611.854 | 3374.721 |
| 23044 | LOC11962  | 6.583457 | 0.544599 | 0.980894 | 0.555206 | 0.578754 | 0.667686 | 2.710432 | 4.926706 | 8.348776 | 8.928508 | 8.556443 | 6.029877 |
| 7203  | IER5L     | 498.2221 | 0.544352 | 0.148481 | 3.666129 | 0.000246 | 0.000909 | 406.5648 | 379.3564 | 432.7449 | 613.8349 | 517.6648 | 639.1669 |
| 10607 | CYBSRL    | 206.5858 | 0.544309 | 0.20013  | 2.71978  | 0.006533 | 0.016373 | 175.0939 | 171.3399 | 160.0182 | 209.8199 | 243.8586 | 279.3843 |
| 10061 | LOC11962  | 383.7717 | 0.544197 | 0.191035 | 2.848674 | 0.00439  | 0.011601 | 366.9925 | 237.0293 | 332.5596 | 435.2648 | 485.5781 | 445.2059 |
| 15726 | LOC11962  | 141.6826 | 0.544131 | 0.317588 | 1.713325 | 0.086653 | 0.146488 | 81.31296 | 177.9088 | 86.27069 | 176.338  | 160.4333 | 167.8316 |
| 6026  | EZR       | 16388.83 | 0.544104 | 0.130995 | 4.153621 | 3.27E-05 | 0.000144 | 11904.76 | 16250.47 | 11850.39 | 19171.74 | 18186.72 | 20968.9  |
| 4166  | FNTA      | 1326.508 | 0.544103 | 0.103684 | 5.247718 | 1.54E-07 | 9.83E-07 | 1048.937 | 1099.203 | 1086.732 | 1611.596 | 1617.168 | 1495.409 |
| 7217  | HNFG6     | 675.5546 | 0.543917 | 0.14855  | 3.661514 | 0.000251 | 0.000924 | 507.9349 | 637.1874 | 500.9266 | 814.7263 | 859.9225 | 732.63   |
| 18225 | LOC11962  | 35.76014 | 0.543906 | 0.419452 | 1.296706 | 0.194732 | 0.284058 | 32.52518 | 25.72836 | 29.22072 | 37.94616 | 44.92132 | 44.2191  |
| 13819 | LOC10322  | 147.0826 | 0.543834 | 0.265939 | 2.04496  | 0.040859 | 0.078604 | 147.4475 | 85.94365 | 125.2316 | 200.8914 | 156.1551 | 166.8266 |
| 19552 | FER1L5    | 28.36772 | 0.543676 | 0.498622 | 1.090356 | 0.275556 | 0.374657 | 23.8518  | 17.51718 | 27.13352 | 37.94616 | 40.6431  | 23.11453 |
| 7030  | TET2      | 1750.633 | 0.543471 | 0.146015 | 3.722029 | 0.000198 | 0.000747 | 1235.415 | 1770.33  | 1269.014 | 2004.45  | 2074.937 | 2149.651 |
| 5942  | CLCF1     | 768.3284 | 0.543094 | 0.12964  | 1.92964  | 2.80E-05 | 0.000125 | 584.9112 | 653.0623 | 640.7686 | 946.4218 | 815.0012 | 969.8052 |
| 21479 | LOC11962  | 14.92212 | 0.542839 | 0.672632 | 0.807037 | 0.419645 | 0.519324 | 9.757555 | 11.49565 | 14.61036 | 20.08914 | 23.53022 | 10.04979 |
| 20617 | LOC10323  | 21.93854 | 0.542649 | 0.581106 | 0.933821 | 0.350396 | 0.451825 | 17.88885 | 18.06459 | 17.39328 | 13.39276 | 42.78221 | 22.10955 |
| 7320  | CLYBL     | 379.2354 | 0.542555 | 0.149559 | 3.627697 | 0.000286 | 0.001039 | 294.895  | 321.8781 | 308.9047 | 475.443  | 432.1004 | 442.191  |
| 6714  | PBK       | 1339.525 | 0.542356 | 0.14086  | 3.850316 | 0.000118 | 0.000467 | 1160.607 | 883.5227 | 1228.662 | 1504.454 | 1677.063 | 1582.843 |
| 23449 | LOC11961  | 4.788584 | 0.542328 | 1.100554 | 0.492777 | 0.62217  | 0.705377 | 3.794605 | 3.284471 | 4.87012  | 4.464254 | 4.278221 | 8.039836 |
| 20367 | GRIK4     | 24.72809 | 0.542147 | 0.560895 | 0.966574 | 0.333757 | 0.435652 | 13.55216 | 21.89647 | 24.3506  | 24.5534  | 49.2132  | 19.09461 |
| 20761 | LOC11961  | 21.95396 | 0.54196  | 0.595816 | 0.90961  | 0.363028 | 0.464867 | 21.68345 | 15.32753 | 16.00182 | 44.64254 | 14.97377 | 19.09461 |
| 8175  | SLC18B1   | 369.5771 | 0.541858 | 0.161544 | 3.354232 | 0.000796 | 0.002588 | 322.5414 | 276.9904 | 306.1218 | 397.3186 | 432.1004 | 482.3901 |
| 4045  | COX20     | 1652.403 | 0.541735 | 0.10148  | 5.338315 | 9.38E-08 | 6.17E-07 | 1335.159 | 1391.521 | 1306.584 | 1993.289 | 2040.712 | 1847.152 |
| 22406 | LOC10321  | 12.1302  | 0.541669 | 0.825981 | 0.655789 | 0.51196  | 0.607447 | 12.46799 | 7.116354 | 9.740239 | 4.464254 | 29.94755 | 9.044815 |
| 8974  | LOC10323  | 286.5206 | 0.541252 | 0.173241 | 3.124267 | 0.001782 | 0.005281 | 253.1543 | 216.2277 | 232.3743 | 308.0335 | 346.5359 | 362.7976 |
| 4446  | KIAA1671  | 1398.968 | 0.541165 | 0.107274 | 5.044685 | 4.54E-07 | 2.72E-06 | 1089.594 | 1196.095 | 1136.825 | 1616.06  | 1591.498 | 1763.739 |
| 2740  | PON2      | 6249.111 | 0.540481 | 0.079581 | 6.791613 | 1.11E-11 | 1.08E-10 | 5080.976 | 5175.779 | 5018.31  | 7448.608 | 7420.575 | 7350.42  |
| 23545 | TRNAS-CG  | 6.040978 | 0.540226 | 1.131854 | 0.477293 | 0.633154 | 0.714903 | 5.96295  | 3.284471 | 5.565851 | 13.39276 | 0        | 8.039836 |
| 4910  | CITED2    | 3922.943 | 0.53998  | 0.113938 | 4.739233 | 2.15E-06 | 1.16E-05 | 2874.684 | 3670.944 | 3046.608 | 4761.127 | 4440.794 | 4743.503 |
| 7572  | TKC21A    | 403.2273 | 0.539879 | 0.15274  | 3.534628 | 0.000408 | 0.001434 | 351.8141 | 324.0678 | 312.3834 | 444.1933 | 466.3261 | 520.5794 |
| 11642 | PKD1L1    | 155.1559 | 0.539841 | 0.217244 | 2.484956 | 0.012957 | 0.029587 | 126.3061 | 125.9047 | 125.9274 | 176.338  | 209.6328 | 166.8266 |
| 17727 | LOC10322  | 62.28171 | 0.539556 | 0.391021 | 1.379865 | 0.167628 | 0.25139  | 50.95612 | 31.74989 | 68.87741 | 78.12444 | 87.70354 | 56.27885 |
| 4236  | ZNFX1     | 2963.496 | 0.539489 | 0.103824 | 5.196197 | 2.03E-07 | 1.28E-06 | 2428.547 | 2586.521 | 2236.081 | 3359.351 | 3394.769 | 3775.708 |
| 3231  | SCPEP1    | 5425.306 | 0.539323 | 0.087952 | 6.132025 | 8.68E-10 | 7.14E-09 | 4651.101 | 4301.015 | 4319.1   | 6437.454 | 6184.169 | 6658.994 |
| 22562 | LOC10322  | 8.062487 | 0.539258 | 0.854846 | 0.630825 | 0.528155 | 0.62233  | 6.505036 | 6.02153  | 6.957314 | 11.16063 | 10.69555 | 7.034856 |
| 4944  | TRAK1     | 3508.396 | 0.539197 | 0.114287 | 4.717899 | 2.38E-06 | 1.28E-05 | 2716.937 | 3218.781 | 2649.345 | 3950.865 | 3965.911 | 4548.537 |
| 23396 | LOC11962  | 6.617596 | 0.538978 | 1.078795 | 0.499611 | 0.617349 | 0.701497 | 1.626259 | 2.737059 | 11.82743 | 8.928508 | 8.556443 | 6.029877 |
| 21536 | LOC10322  | 13.16799 | 0.53868  | 0.67386  | 0.799394 | 0.424062 | 0.523481 | 9.757555 | 12.04306 | 10.43597 | 17.85702 | 12.83466 | 16.07967 |
| 24353 | LOC11962  | 2.392909 | 0.538464 | 1.524128 | 0.353293 | 0.723869 | 0.790213 | 2.710432 | 1.642235 | 1.391463 | 4.464254 | 2.139111 | 2.009959 |
| 5760  | MAP3K1    | 6000.729 | 0.538338 | 0.125328 | 4.295444 | 1.74E-05 | 8.05E-05 | 4367.048 | 5850.737 | 4465.9   | 7042.361 | 6751.033 | 7527.296 |
| 24131 | LOC10321  | 3.30093  | 0.538063 | 1.396999 | 0.385156 | 0.700122 | 0.771321 | 3.252518 | 1.094824 | 3.478657 | 6.696381 | 4.278221 | 1.004979 |
| 24453 | GLIPR1L2  | 2.396459 | 0.538007 | 1.594621 | 0.337388 | 0.735824 | 0.799946 | 0.542086 | 3.831883 | 1.391463 | 4.464254 | 2.139111 | 2.009959 |
| 4811  | MAGT1     | 7056.811 | 0.537273 | 0.111769 | 4.806999 | 1.53E-06 | 8.47E-06 | 6286.576 | 4888.935 | 6099.477 | 8325.834 | 8207.768 | 8532.276 |
| 18018 | CBLN2     | 51.62237 | 0.53707  | 0.400641 | 1.340528 | 0.180074 | 0.265693 | 40.65648 | 36.67659 | 48.00546 | 51.33892 | 89.84265 | 43.21412 |
| 5197  | ACOX2     | 922.261  | 0.536795 | 0.117164 | 4.581582 | 4.61E-06 | 2.36E-05 | 757.2947 | 735.7215 | 768.7832 | 1011.154 | 1088.807 | 1171.806 |
| 6627  | BCOR      | 2415.202 | 0.536571 | 0.137927 | 3.890244 | 0.0001   | 0.000402 | 1733.05  | 2396.569 | 1785.942 | 2790.159 | 2710.253 | 3075.237 |
| 23255 | LOC10324  | 5.673887 | 0.536314 | 1.028542 | 0.521431 | 0.602067 | 0.68828  | 5.96295  | 4.926706 | 2.782925 | 8.928508 | 6.417332 | 5.024897 |
| 5131  | CCNE2     | 747.9063 | 0.53623  | 0.116238 | 4.613196 | 3.97E-06 | 2.05E-05 | 606.0526 | 606.5323 | 618.5052 | 906.2436 | 872.7572 | 877.3471 |
| 13650 | MAN1C1    | 119.071  | 0.535754 | 0.257738 | 2.078682 | 0.037647 | 0.073321 | 111.6698 | 84.30142 | 96.70666 | 147.3204 | 117.6511 | 156.7768 |
| 23925 | LOC11961  | 3.872957 | 0.535745 | 1.277863 | 0.419251 | 0.675033 | 0.750083 |          |          |          |          |          |          |



|       |           |          |          |          |          |          |          |          |          |          |          |          |          |
|-------|-----------|----------|----------|----------|----------|----------|----------|----------|----------|----------|----------|----------|----------|
| 4634  | HOMER3    | 1621.241 | 0.534773 | 0.108523 | 4.92775  | 8.32E-07 | 4.77E-06 | 1223.489 | 1421.628 | 1330.238 | 1843.737 | 1897.391 | 2010.964 |
| 9628  | ZNF174    | 281.2492 | 0.534594 | 0.180994 | 2.953661 | 0.00314  | 0.008673 | 228.7604 | 223.8914 | 240.0273 | 290.1765 | 318.7275 | 385.9121 |
| 8180  | ZSCAN2    | 459.2549 | 0.534426 | 0.159407 | 3.352587 | 0.000801 | 0.002602 | 417.4065 | 390.852  | 317.9492 | 537.9426 | 515.5257 | 575.8532 |
| 23134 | LOC119624 | 6.587233 | 0.534367 | 0.990638 | 0.539417 | 0.589599 | 0.677526 | 3.252518 | 7.663765 | 4.87012  | 11.16063 | 8.556443 | 4.019918 |
| 24449 | LOC119620 | 2.669708 | 0.534053 | 1.58124  | 0.337743 | 0.735557 | 0.799819 | 2.168345 | 3.284471 | 1.391463 | 0        | 2.139111 | 7.034856 |
| 8609  | WHRN      | 324.8717 | 0.533937 | 0.165506 | 3.2261   | 0.001255 | 0.003875 | 288.932  | 269.3266 | 236.5487 | 399.5507 | 385.0399 | 369.8324 |
| 4683  | XRN1      | 5962.297 | 0.53388  | 0.10909  | 4.893958 | 9.88E-07 | 5.61E-06 | 4525.337 | 5573.747 | 4516.688 | 6794.595 | 7078.317 | 7285.096 |
| 22676 | TRNAG-UC  | 8.685282 | 0.533859 | 0.874572 | 0.610423 | 0.541582 | 0.634821 | 8.131296 | 4.379295 | 8.348776 | 13.39276 | 12.83466 | 5.024897 |
| 3812  | DIP2C     | 1549.711 | 0.533716 | 0.096527 | 5.529178 | 3.22E-08 | 2.24E-07 | 1281.492 | 1267.806 | 1250.229 | 1839.273 | 1803.27  | 1856.197 |
| 6645  | AUH       | 558.4689 | 0.533391 | 0.137466 | 3.880173 | 0.000104 | 0.000418 | 417.4065 | 480.6276 | 472.4016 | 680.7987 | 618.203  | 681.3761 |
| 4928  | ATXN1     | 2549.146 | 0.532912 | 0.112702 | 4.728495 | 2.26E-06 | 1.22E-05 | 1907.602 | 2309.53  | 2037.101 | 3017.836 | 2795.818 | 3226.989 |
| 27493 | LOC119626 | 0.632531 | 0.532848 | 2.980222 | 0.178795 | 0.858099 | NA       | 0.542086 | 0.547412 | 0.695731 | 0        | 0        | 2.009959 |
| 4441  | DIP2B     | 4606.18  | 0.532846 | 0.105537 | 5.0489   | 4.44E-07 | 2.66E-06 | 3635.231 | 4112.705 | 3551.709 | 5392.819 | 5033.327 | 5911.289 |
| 4824  | STARD8    | 1154.089 | 0.532807 | 0.111088 | 4.796273 | 1.62E-06 | 8.91E-06 | 948.6511 | 932.7897 | 953.152  | 1325.883 | 1287.745 | 1476.315 |
| 16806 | TRNAI-AAI | 87.34645 | 0.532712 | 0.34945  | 1.524427 | 0.127402 | 0.201534 | 78.60252 | 47.07742 | 90.44508 | 75.89232 | 98.39909 | 133.6623 |
| 15113 | LOC103234 | 76.3536  | 0.532656 | 0.294137 | 1.81091  | 0.070155 | 0.123408 | 60.17159 | 68.42648 | 58.44144 | 98.21359 | 83.42532 | 89.44317 |
| 4241  | ENTPD4    | 7715.224 | 0.532089 | 0.102465 | 5.192898 | 2.07E-07 | 1.30E-06 | 6091.425 | 7068.729 | 5766.222 | 9024.489 | 8898.7   | 9441.782 |
| 19803 | LOC119628 | 28.99208 | 0.53206  | 0.505329 | 1.052898 | 0.292388 | 0.392523 | 23.8518  | 29.56024 | 16.69755 | 37.94616 | 42.78221 | 73.11453 |
| 3716  | NGLY1     | 2916.973 | 0.531916 | 0.094526 | 5.627203 | 1.83E-08 | 1.31E-07 | 2279.473 | 2542.728 | 2332.787 | 3374.976 | 3550.924 | 3420.95  |
| 8256  | ZIK1      | 326.7999 | 0.531899 | 0.159848 | 3.327537 | 0.000876 | 0.002821 | 285.1374 | 247.4301 | 269.9438 | 381.6937 | 378.6226 | 397.9719 |
| 9448  | TTL11     | 238.485  | 0.531755 | 0.177372 | 2.997969 | 0.002718 | 0.007648 | 190.8144 | 206.3743 | 188.5432 | 276.7837 | 275.9453 | 292.449  |
| 4316  | PJA2      | 8477.568 | 0.531733 | 0.103381 | 5.143427 | 2.70E-07 | 1.66E-06 | 6538.646 | 7815.398 | 6445.951 | 9836.984 | 9790.71  | 10437.72 |
| 21030 | RRH       | 18.48081 | 0.53171  | 0.607045 | 0.875898 | 0.381086 | 0.481748 | 15.7205  | 18.612   | 10.43597 | 20.08914 | 29.94755 | 16.07967 |
| 5555  | FAM126B   | 1259.742 | 0.53168  | 0.121106 | 4.390213 | 1.13E-05 | 5.42E-05 | 1013.159 | 1083.875 | 998.3745 | 1475.436 | 1328.388 | 1659.221 |
| 10691 | FBXO16    | 217.7717 | 0.531543 | 0.197279 | 2.694376 | 0.007052 | 0.017535 | 164.2522 | 202.5424 | 166.2798 | 249.9982 | 282.3626 | 241.1951 |
| 4473  | CANX      | 57762.23 | 0.531472 | 0.105717 | 5.02731  | 4.97E-07 | 2.96E-06 | 44266.77 | 54134.65 | 43324.58 | 66970.51 | 66825.82 | 71051.04 |
| 8209  | SCRIB     | 3422.881 | 0.531395 | 0.158927 | 3.343644 | 0.000827 | 0.002677 | 3144.643 | 2097.135 | 3160.708 | 4031.221 | 3535.95  | 4567.632 |
| 22028 | LOC103214 | 14.60722 | 0.531327 | 0.737057 | 0.720875 | 0.470986 | 0.568421 | 5.420864 | 16.96977 | 13.2189  | 11.16063 | 27.80844 | 13.06473 |
| 17561 | LOC103220 | 54.12404 | 0.531225 | 0.377951 | 1.405538 | 0.159861 | 0.242008 | 37.94605 | 56.93083 | 36.87376 | 64.73168 | 77.00798 | 51.25395 |
| 13170 | CNNM1     | 130.7024 | 0.531171 | 0.244037 | 2.176597 | 0.029511 | 0.05957  | 98.11763 | 123.1677 | 100.881  | 142.8561 | 143.3204 | 175.8714 |
| 6933  | LOC103225 | 420.0879 | 0.53073  | 0.141028 | 3.763283 | 0.000168 | 0.000643 | 353.4403 | 341.585  | 335.3425 | 504.4607 | 496.2737 | 489.425  |
| 6310  | NSFL1C    | 3333.679 | 0.530689 | 0.131958 | 4.021656 | 5.78E-05 | 0.000244 | 2434.51  | 3286.113 | 2462.889 | 3984.347 | 3668.575 | 4165.64  |
| 20515 | LOC119627 | 22.9924  | 0.530684 | 0.562338 | 0.943709 | 0.345318 | 0.447511 | 23.8518  | 16.42235 | 15.30609 | 26.78552 | 38.50399 | 17.08465 |
| 23986 | TRNAV-AA  | 3.5927   | 0.53063  | 1.296793 | 0.409186 | 0.682403 | 0.756345 | 1.084173 | 4.926706 | 2.782925 | 4.464254 | 4.278221 | 4.019918 |
| 21350 | LOC103247 | 16.41171 | 0.530562 | 0.643731 | 0.824198 | 0.409827 | 0.510317 | 10.84173 | 13.6853  | 15.30609 | 15.62489 | 29.94755 | 13.06473 |
| 23684 | LOC119620 | 4.762812 | 0.530265 | 1.162928 | 0.455974 | 0.648409 | 0.727831 | 3.252518 | 3.284471 | 4.87012  | 4.464254 | 10.69555 | 2.009959 |
| 21216 | NOL4      | 24.63432 | 0.530214 | 0.625156 | 0.848131 | 0.396365 | 0.496671 | 10.84173 | 22.9913  | 25.74206 | 31.24978 | 44.92132 | 12.05975 |
| 23781 | LOC119627 | 5.066902 | 0.529558 | 1.204167 | 0.439771 | 0.660103 | 0.737935 | 3.794605 | 2.737059 | 5.565851 | 4.464254 | 12.83466 | 1.004979 |
| 19985 | LOC103238 | 76.23947 | 0.529215 | 0.512995 | 1.031616 | 0.302252 | 0.40207  | 23.30971 | 22.44388 | 18.08902 | 24.5534  | 49.2132  | 24.11951 |
| 5856  | SMIM19    | 746.3305 | 0.529125 | 0.124728 | 4.242215 | 2.21E-05 | 0.0001   | 583.2849 | 590.6573 | 658.1619 | 868.2974 | 928.374  | 849.2077 |
| 16563 | CUNH16or  | 69.70601 | 0.529055 | 0.338354 | 1.563615 | 0.117908 | 0.189252 | 66.13454 | 41.05589 | 64.70302 | 69.19594 | 87.70354 | 89.44317 |
| 3912  | ATXN3     | 2561.418 | 0.528946 | 0.097307 | 5.435859 | 5.45E-08 | 3.71E-07 | 2115.221 | 2221.945 | 1952.918 | 3098.192 | 2956.251 | 3023.983 |
| 19917 | KANK3     | 26.64949 | 0.528632 | 0.505931 | 1.044869 | 0.296083 | 0.395209 | 19.51511 | 20.80165 | 24.3506  | 33.4819  | 40.6431  | 21.10457 |
| 7037  | FAHD1     | 644.0632 | 0.528227 | 0.142098 | 3.717332 | 0.000201 | 0.000761 | 501.4299 | 598.3211 | 481.4461 | 814.7263 | 718.7412 | 749.7147 |
| 23439 | LOC103222 | 5.649106 | 0.527996 | 0.527996 | 0.493725 | 0.621501 | 0.704906 | 4.878777 | 3.831883 | 4.87012  | 4.464254 | 12.83466 | 3.014938 |
| 5642  | SMIM3     | 792.5954 | 0.527948 | 0.121354 | 4.350494 | 1.36E-05 | 6.40E-05 | 666.7662 | 605.9849 | 676.9466 | 892.8508 | 941.2087 | 971.8151 |
| 9558  | LOC119625 | 692.5548 | 0.527722 | 0.177657 | 2.97046  | 0.002974 | 0.008271 | 481.3727 | 730.7948 | 487.7077 | 863.8331 | 827.8358 | 763.7844 |
| 16440 | LOC119628 | 60.92083 | 0.527457 | 0.333425 | 1.581939 | 0.113664 | 0.183804 | 54.20864 | 41.6033  | 53.57132 | 80.35657 | 68.45154 | 67.33362 |
| 5073  | MMUT      | 1485.566 | 0.527345 | 0.113494 | 4.646464 | 3.38E-06 | 1.77E-05 | 1169.822 | 1342.801 | 1138.912 | 1808.023 | 1659.95  | 1793.888 |
| 10267 | RESF1     | 1181.105 | 0.527151 | 0.18848  | 2.796847 | 0.00516  | 0.013363 | 760.0051 | 1329.116 | 814.0057 | 1410.704 | 1332.666 | 1440.136 |
| 15147 | LOC103234 | 94.42395 | 0.527099 | 0.291815 | 1.80628  | 0.070875 | 0.124394 | 66.67662 | 98.53413 | 66.79021 | 118.3027 | 102.6773 | 113.5627 |
| 25320 | LOC119628 | 0.886294 | 0.526927 | 2.677731 | 0.196781 | 0.843999 | 0.88613  | 1.626259 | 0.547412 | 0        | 0        | 2.139111 | 1.004979 |
| 25321 | LOC119627 | 0.886294 | 0.526927 | 2.677731 | 0.196781 | 0.843999 | 0.88613  | 1.626259 | 0.547412 | 0        | 0        | 2.139111 | 1.004979 |
| 25310 | LOC119615 | 0.901796 | 0.526656 | 2.664348 | 0.197668 | 0.843305 | 0.885738 | 1.626259 | 0.547412 | 0        | 2.232127 | 0        | 1.004979 |
| 3632  | OXR1      | 5152.736 | 0.526486 | 0.092196 | 5.71048  | 1.13E-08 | 8.25E-08 | 4154.008 | 4530.38  | 3983.062 | 5921.833 | 6276.151 | 6050.981 |
| 7390  | LOC119620 | 6911.604 | 0.526027 | 0.146004 | 3.602815 | 0.000315 | 0.001132 | 5529.695 | 5818.988 | 5604.116 | 8227.62  | 6237.647 | 10001.56 |
| 19618 | LOC103247 | 27.58883 | 0.525967 | 0.485648 | 1.083023 | 0.278798 | 0.377809 | 20.0572  | 24.08612 | 22.95914 | 37.94616 | 36.36488 | 24.11951 |
| 7893  | TNFSF12   | 408.0187 | 0.525922 | 0.152712 | 3.443885 | 0.000573 | 0.001931 | 319.831  | 367.3133 | 317.9492 | 464.2824 | 464.187  | 514.5495 |
| 4971  | ARHGEF17  | 3193.703 | 0.525764 | 0.111799 | 4.702776 | 2.57E-06 | 1.37E-05 | 2717.479 | 2508.788 | 2634.735 | 3705.331 | 3349.847 | 4246.038 |
| 5049  | SP100     | 4740.031 | 0.525681 | 0.112772 | 4.661434 | 3.14E-06 | 1.65E-05 | 3573.433 | 4500.273 | 3583.712 | 5524.514 | 5617.305 | 5640.95  |
| 4485  | LSS       | 8272.527 | 0.525507 | 0.104695 | 5.019407 | 5.18E-07 | 3.07E-06 | 7190.776 | 6371.326 | 6791.73  | 9464.218 | 8937.204 | 10879.91 |
| 23622 | LOC119618 | 4.768112 | 0.525482 | 1.128477 | 0.465656 | 0.641462 | 0.721923 | 4.878777 | 2.737059 | 4.174388 | 2.232127 | 8.556443 | 6.029877 |
| 4176  | LNx2      | 2258.617 | 0.525445 | 0.100208 | 5.243518 | 1.58E-07 | 1.00E-06 | 1782.38  | 1970.135 | 1806.119 | 2529     | 2663.193 | 2800.878 |
| 3674  | PLOD1     | 6570.679 | 0.525193 | 0.092541 | 5.675213 | 1.39E-08 | 1.00E-07 | 5390.507 | 5508.058 | 5270.165 | 7718.695 | 7185.273 | 8351.379 |
| 29010 | LOC119627 | 0.631644 | 0.524736 | 3.306383 | 0.158704 | 0.873902 | NA       | 1.084173 | 0        | 0.695731 | 0        | 0        | 2.009959 |
| 19828 | LOC103238 | 27.25142 | 0.524702 | 0.49977  | 1.049888 | 0.29377  | 0.39388  | 26.56223 | 16.96977 | 22.95914 | 31.24978 | 40.6431  | 25.12449 |
| 5098  | TAF2      | 5872.915 | 0.524689 | 0.113329 | 4.629778 | 3.66E-06 | 1.91E-05 | 4522.084 | 5562.251 | 4367.106 | 6660.667 | 6864.406 | 7260.977 |
| 16750 | SIGLEC1   | 94.30081 | 0.524087 | 0.341908 | 1.532829 | 0.125318 | 0.1989   | 73.18166 | 56.38342 | 100.881  | 127.2312 | 134.764  | 73.3635  |
| 4093  | CCAR2     | 4843.326 | 0.524083 | 0.098875 | 5.300452 | 1.16E-07 | 7.50E-07 | 4024.449 | 3984.063 | 3917.663 | 5591.478 | 5245.099 | 6297.201 |
| 5616  | POLR2A    | 1092.583 | 0.523898 | 0.120034 | 4.36457  | 1.27E-05 | 6.03E-05 | 917.2101 | 962.8974 |          |          |          |          |



|       |           |          |          |          |          |          |          |          |          |          |          |          |          |
|-------|-----------|----------|----------|----------|----------|----------|----------|----------|----------|----------|----------|----------|----------|
| 25303 | LOC119626 | 0.902684 | 0.523171 | 2.636943 | 0.1984   | 0.842732 | 0.885395 | 1.084173 | 1.094824 | 0        | 2.232127 | 0        | 1.004979 |
| 25304 | LOC119626 | 0.902684 | 0.523171 | 2.636943 | 0.1984   | 0.842732 | 0.885395 | 1.084173 | 1.094824 | 0        | 2.232127 | 0        | 1.004979 |
| 6869  | LZTS3     | 856.956  | 0.523064 | 0.138056 | 3.788792 | 0.000151 | 0.000586 | 685.1972 | 798.6738 | 627.5497 | 1029.011 | 921.9567 | 1079.348 |
| 10295 | CCDC25    | 769.4773 | 0.52296  | 0.187444 | 2.789946 | 0.005272 | 0.013613 | 534.4972 | 847.9409 | 511.3626 | 901.7793 | 919.8176 | 901.4666 |
| 6864  | PRDX3     | 7823.134 | 0.52292  | 0.13793  | 3.791205 | 0.00015  | 0.000581 | 7177.766 | 4948.603 | 7137.508 | 9325.827 | 8791.745 | 9557.355 |
| 6125  | THBS3     | 1648.792 | 0.522832 | 0.127318 | 4.106509 | 4.02E-05 | 0.000174 | 1488.569 | 1189.526 | 1386.593 | 1828.112 | 1833.218 | 2166.736 |
| 4805  | PNPLA3    | 1481.448 | 0.522704 | 0.108663 | 4.810324 | 1.51E-06 | 8.34E-06 | 1222.405 | 1208.685 | 1222.4   | 1665.167 | 1653.533 | 1916.496 |
| 21599 | LOC10324  | 24.87164 | 0.522678 | 0.661124 | 0.790589 | 0.429184 | 0.528258 | 10.29964 | 39.96106 | 10.43597 | 26.78552 | 40.6431  | 21.10457 |
| 20674 | LOC10322  | 22.13535 | 0.522396 | 0.564556 | 0.925323 | 0.354798 | 0.45624  | 14.09425 | 26.27577 | 13.91463 | 22.32127 | 32.08666 | 24.11951 |
| 21060 | LOC11961  | 19.97637 | 0.522322 | 0.599401 | 0.871406 | 0.383532 | 0.48415  | 17.88885 | 15.32753 | 16.00182 | 11.16063 | 36.36488 | 23.11453 |
| 4310  | CUNH8orf  | 1889.866 | 0.522166 | 0.101395 | 5.149815 | 2.61E-07 | 1.61E-06 | 1611.623 | 1466.516 | 1579.31  | 2252.216 | 2107.024 | 2322.508 |
| 9303  | LOC11962  | 428.1075 | 0.5221   | 0.172227 | 3.031458 | 0.002434 | 0.006955 | 339.8882 | 408.9166 | 308.209  | 455.3539 | 483.439  | 572.8383 |
| 5534  | LSG1      | 1568.889 | 0.522047 | 0.118685 | 4.398578 | 1.09E-05 | 5.23E-05 | 1262.519 | 1442.978 | 1160.48  | 1816.951 | 1779.74  | 1950.665 |
| 4929  | PACS1     | 1059.867 | 0.521958 | 0.110397 | 4.728    | 2.27E-06 | 1.22E-05 | 877.6378 | 840.8245 | 895.4063 | 1229.902 | 1197.902 | 1317.528 |
| 14423 | SEC31B    | 96.0482  | 0.521516 | 0.2689   | 1.939443 | 0.052447 | 0.096673 | 80.22878 | 82.65918 | 72.35606 | 122.767  | 119.7902 | 98.48799 |
| 22690 | LOC11962  | 10.70349 | 0.521476 | 0.855596 | 0.609488 | 0.542201 | 0.63522  | 7.047123 | 12.04306 | 6.957314 | 4.464254 | 25.66933 | 8.039836 |
| 22951 | C1QTNF12  | 6.924537 | 0.521294 | 0.912984 | 0.570978 | 0.568014 | 0.657952 | 5.420864 | 5.474118 | 6.261582 | 8.928508 | 6.417332 | 9.044815 |
| 23864 | LOC10323  | 3.911404 | 0.521019 | 1.216949 | 0.428135 | 0.668553 | 0.744782 | 2.168345 | 3.831883 | 3.478657 | 6.696381 | 4.782221 | 3.014938 |
| 11068 | HOXD3     | 196.9063 | 0.52075  | 0.199386 | 2.611771 | 0.009007 | 0.021634 | 154.4946 | 180.6459 | 150.9737 | 229.9091 | 218.1893 | 247.2249 |
| 4276  | TET3      | 1970.718 | 0.520741 | 0.100682 | 5.172135 | 2.31E-07 | 1.44E-06 | 1607.828 | 1731.464 | 1517.39  | 2334.805 | 2278.153 | 2354.667 |
| 5402  | LOC10324  | 10013.18 | 0.520332 | 0.1166   | 4.462553 | 8.10E-06 | 3.99E-05 | 7620.65  | 9619.12  | 7442.934 | 11495.45 | 11343.7  | 12557.22 |
| 13361 | LOC10324  | 153.3913 | 0.519873 | 0.243529 | 2.134752 | 0.032781 | 0.065226 | 158.8313 | 112.7668 | 105.7512 | 183.0344 | 186.1026 | 173.8614 |
| 25422 | LOC11962  | 0.892151 | 0.519687 | 2.924601 | 0.177695 | 0.858963 | 0.898258 | 0        | 1.642235 | 0.695731 | 0        | 0        | 3.014938 |
| 12348 | ISG20     | 170.8615 | 0.519625 | 0.222596 | 2.334391 | 0.019575 | 0.042145 | 142.5687 | 118.7884 | 160.7139 | 216.5163 | 177.5462 | 209.0357 |
| 7957  | PPP1R13L  | 420.7357 | 0.519576 | 0.151781 | 3.423194 | 0.000619 | 0.002068 | 325.2518 | 368.9556 | 342.2998 | 546.8711 | 455.6306 | 485.4051 |
| 2932  | CD63      | 16380.47 | 0.519422 | 0.079806 | 6.508563 | 7.59E-11 | 6.88E-10 | 13245.34 | 13944.77 | 13202.2  | 19133.79 | 18854.12 | 19902.61 |
| 19680 | LOC11962  | 28.1845  | 0.519246 | 0.483569 | 1.07378  | 0.282922 | 0.382188 | 22.22554 | 23.53871 | 22.95914 | 33.4819  | 42.78221 | 24.11951 |
| 4902  | KSR1      | 974.522  | 0.518983 | 0.109465 | 4.741071 | 2.13E-06 | 1.15E-05 | 771.931  | 822.76   | 807.7441 | 1167.402 | 1148.702 | 1128.592 |
| 5599  | POLK      | 2444.898 | 0.518687 | 0.118578 | 4.374216 | 1.22E-05 | 5.79E-05 | 1884.834 | 2293.108 | 1852.037 | 2676.32  | 3071.763 | 2891.326 |
| 6762  | TRAF5     | 715.5534 | 0.518546 | 0.13534  | 3.831433 | 0.000127 | 0.000501 | 583.2849 | 643.2089 | 536.4089 | 801.3336 | 924.0958 | 804.9886 |
| 7869  | SDF2L1    | 462.9864 | 0.518449 | 0.150287 | 3.449721 | 0.000561 | 0.001896 | 401.1439 | 336.1109 | 406.3071 | 513.3892 | 556.1688 | 564.7985 |
| 14651 | LOC11962  | 108.8993 | 0.518401 | 0.273304 | 1.896794 | 0.057855 | 0.104981 | 74.26583 | 108.3875 | 84.87923 | 145.0883 | 126.2075 | 114.5677 |
| 21861 | FAM24B    | 15.83586 | 0.518203 | 0.690475 | 0.750501 | 0.452953 | 0.550812 | 12.46799 | 11.49565 | 14.61036 | 11.16063 | 34.22577 | 11.05477 |
| 17659 | TMEM8B    | 57.96254 | 0.518137 | 0.371147 | 1.394829 | 0.163067 | 0.245492 | 61.79785 | 33.39212 | 47.30973 | 66.96381 | 77.00798 | 61.30375 |
| 6693  | TAP2      | 1082.353 | 0.517961 | 0.134228 | 3.858818 | 0.000114 | 0.000453 | 943.2303 | 784.9885 | 946.8904 | 1238.83  | 1155.12  | 1425.061 |
| 9409  | SFT2D2    | 418.7279 | 0.517848 | 0.172292 | 3.005645 | 0.00265  | 0.007488 | 374.5817 | 298.3394 | 363.8675 | 426.3363 | 483.439  | 565.8034 |
| 4790  | CAPZA2    | 13906.83 | 0.517534 | 0.107389 | 4.819254 | 1.44E-06 | 8.00E-06 | 11696.06 | 10030.77 | 12587.17 | 16533.36 | 17262.62 | 15330.96 |
| 6678  | RRBP1     | 5667.765 | 0.517388 | 0.133833 | 3.865918 | 0.000111 | 0.000441 | 4089.5   | 5694.725 | 4204.305 | 6618.256 | 6265.455 | 7134.349 |
| 8900  | PPCDC     | 617.4078 | 0.517357 | 0.164507 | 3.14489  | 0.001661 | 0.004963 | 552.9281 | 448.3303 | 527.3644 | 683.0309 | 622.4812 | 870.3122 |
| 23846 | LOC10324  | 5.146612 | 0.517201 | 1.200267 | 0.430905 | 0.666537 | 0.743097 | 2.710432 | 6.02153  | 4.174388 | 8.928508 | 0        | 9.044815 |
| 17591 | LOC10323  | 54.22106 | 0.516892 | 0.368867 | 1.401295 | 0.161126 | 0.24309  | 33.60935 | 53.64636 | 46.614   | 73.66019 | 53.47777 | 64.31869 |
| 21550 | LOC11961  | 15.62369 | 0.516884 | 0.648848 | 0.796618 | 0.425673 | 0.525128 | 10.84173 | 17.51718 | 9.740239 | 22.32127 | 19.252   | 14.06971 |
| 20621 | NOXRED1   | 24.37132 | 0.516487 | 0.553582 | 0.93299  | 0.350825 | 0.452283 | 14.63633 | 19.70683 | 25.04633 | 31.24978 | 38.50399 | 17.08465 |
| 4569  | TANC1     | 2980.538 | 0.516457 | 0.104121 | 4.960138 | 7.04E-07 | 4.10E-06 | 2433.426 | 2641.809 | 2286.869 | 3334.798 | 3407.603 | 3778.723 |
| 24951 | LOC11962  | 1.504412 | 0.516417 | 2.029396 | 0.254468 | 0.799134 | 0.851468 | 0.542086 | 0.547412 | 2.782925 | 0        | 2.139111 | 3.014938 |
| 4110  | HEXA      | 4858.207 | 0.516378 | 0.097686 | 5.286131 | 1.25E-07 | 8.08E-07 | 4180.028 | 3906.331 | 3913.489 | 5571.389 | 5337.081 | 6240.923 |
| 4196  | CPSF1     | 8421.625 | 0.516277 | 0.09888  | 5.221244 | 1.78E-07 | 1.13E-06 | 7136.567 | 6502.705 | 7159.076 | 9807.966 | 9116.89  | 10806.54 |
| 14869 | LOC10322  | 117.0533 | 0.516201 | 0.277606 | 1.859476 | 0.06296  | 0.112569 | 123.5957 | 85.94365 | 78.61764 | 127.2312 | 158.2942 | 128.6374 |
| 4088  | RAB1B     | 3708.264 | 0.516081 | 0.09727  | 5.305673 | 1.12E-07 | 7.30E-07 | 3110.492 | 3051.273 | 2999.994 | 4303.541 | 4040.78  | 4743.503 |
| 8862  | TOR4A     | 479.7439 | 0.515953 | 0.163581 | 3.154111 | 0.00161  | 0.004829 | 410.9015 | 332.8264 | 443.1809 | 504.4607 | 586.1163 | 600.9777 |
| 16757 | LOC10323  | 63.53019 | 0.515847 | 0.336716 | 1.531995 | 0.125524 | 0.199147 | 55.29281 | 41.05589 | 61.22436 | 75.89232 | 66.31243 | 81.40334 |
| 7415  | RNASE4    | 686.9897 | 0.515798 | 0.143488 | 3.594702 | 0.000325 | 0.001164 | 604.9684 | 479.5327 | 612.2436 | 845.9761 | 772.219  | 806.9985 |
| 6829  | CKAP2     | 4509.347 | 0.515591 | 0.135411 | 3.807608 | 0.00014  | 0.000546 | 3207.525 | 4586.216 | 3341.598 | 5339.248 | 5294.299 | 5287.197 |
| 5744  | DST       | 102006.2 | 0.515369 | 0.119799 | 4.301954 | 1.69E-05 | 7.84E-05 | 76116.52 | 99567.64 | 76252.16 | 115358.6 | 115661.7 | 129080.6 |
| 5913  | LOC10323  | 43476.12 | 0.515345 | 0.122543 | 4.205417 | 2.61E-05 | 0.000117 | 38684.91 | 28873.78 | 39818.79 | 52274.4  | 51404.97 | 49826.88 |
| 8474  | PUS3      | 826.8495 | 0.515317 | 0.158023 | 3.261015 | 0.00111  | 0.003482 | 612.0155 | 841.9194 | 586.5015 | 997.7608 | 988.2691 | 934.6309 |
| 17651 | NFKBID    | 57.37554 | 0.515077 | 0.368853 | 1.396429 | 0.162585 | 0.244864 | 63.96619 | 38.31883 | 38.96096 | 66.96381 | 72.72976 | 63.31371 |
| 26696 | LOC11961  | 0.603932 | 0.51493  | 3.824945 | 0.134624 | 0.892909 | NA       | 0        | 0        | 1.391463 | 2.232127 | 0        | 0        |
| 27359 | LOC10324  | 0.603932 | 0.51493  | 3.824945 | 0.134624 | 0.892909 | NA       | 0        | 0        | 1.391463 | 2.232127 | 0        | 0        |
| 27540 | LOC10324  | 0.603932 | 0.51493  | 3.824945 | 0.134624 | 0.892909 | NA       | 0        | 0        | 1.391463 | 2.232127 | 0        | 0        |
| 27794 | LOC10322  | 0.603932 | 0.51493  | 3.824945 | 0.134624 | 0.892909 | NA       | 0        | 0        | 1.391463 | 2.232127 | 0        | 0        |
| 28841 | TAS2R19   | 0.603932 | 0.51493  | 3.824945 | 0.134624 | 0.892909 | NA       | 0        | 0        | 1.391463 | 2.232127 | 0        | 0        |
| 28967 | LOC11962  | 0.603932 | 0.51493  | 3.824945 | 0.134624 | 0.892909 | NA       | 0        | 0        | 1.391463 | 2.232127 | 0        | 0        |
| 26698 | IL4       | 0.588429 | 0.514863 | 3.859445 | 0.133403 | 0.893874 | NA       | 0        | 0        | 1.391463 | 0        | 2.139111 | 0        |
| 26949 | LOC11962  | 0.588429 | 0.514863 | 3.859445 | 0.133403 | 0.893874 | NA       | 0        | 0        | 1.391463 | 0        | 2.139111 | 0        |
| 27049 | LOC10323  | 0.588429 | 0.514863 | 3.859445 | 0.133403 | 0.893874 | NA       | 0        | 0        | 1.391463 | 0        | 2.139111 | 0        |
| 27427 | LOC11962  | 0.588429 | 0.514863 | 3.859445 | 0.133403 | 0.893874 | NA       | 0        | 0        | 1.391463 | 0        | 2.139111 | 0        |
| 27455 | LOC11962  | 0.588429 | 0.514863 | 3.859445 | 0.133403 | 0.893874 | NA       | 0        | 0        | 1.391463 | 0        | 2.139111 | 0        |
| 27584 | LOC10324  | 0.588429 | 0.514863 | 3.859445 | 0.133403 | 0.893874 | NA       | 0        | 0        | 1.391463 | 0        | 2.139111 | 0        |
| 27848 | LOC11962  | 0.588429 | 0.514863 | 3.859445 | 0.133403 | 0.893874 | NA       | 0        | 0        | 1.391463 | 0        | 2.139111 | 0        |
| 28049 | LOC11961  | 0.588429 | 0.514863 | 3.859445 | 0.133403 | 0.893874 | NA       | 0        | 0        | 1.391463 | 0        | 2.139111 | 0        |
| 28942 | LGALS7B   | 0.588429 | 0.514863 | 3.859445 | 0.133403 | 0.893874 | NA       | 0        | 0        | 1.391463 | 0        | 2.139111 | 0        |
| 28952 | LOC11962  | 0.588429 | 0.514863 | 3.859445 | 0.133403 | 0.893874 | NA       | 0        | 0        | 1.391463 | 0        | 2.13     |          |



|       |           |          |          |          |          |          |          |          |          |          |          |          |          |
|-------|-----------|----------|----------|----------|----------|----------|----------|----------|----------|----------|----------|----------|----------|
| 6427  | RNF168    | 1548.034 | 0.514811 | 0.129714 | 3.968821 | 7.22E-05 | 0.000299 | 1181.206 | 1502.645 | 1140.304 | 1828.112 | 1779.74  | 1856.197 |
| 5832  | WWP1      | 2019.107 | 0.514644 | 0.12088  | 4.257488 | 2.07E-05 | 9.42E-05 | 1585.061 | 1898.424 | 1506.954 | 2218.734 | 2382.969 | 2522.498 |
| 15816 | LOC119621 | 88.04642 | 0.514258 | 0.302957 | 1.69746  | 0.08961  | 0.150624 | 65.05036 | 87.58589 | 64.00729 | 129.4634 | 87.70354 | 94.46807 |
| 6048  | SOS2      | 2748.681 | 0.514234 | 0.124074 | 4.14458  | 3.40E-05 | 0.00015  | 2073.48  | 2676.296 | 2042.667 | 3191.942 | 3170.162 | 3337.537 |
| 4017  | KANK2     | 6905.249 | 0.514231 | 0.095978 | 5.357791 | 8.42E-08 | 5.58E-07 | 5454.473 | 6062.038 | 5549.849 | 8229.852 | 7512.557 | 8622.724 |
| 5706  | PLD1      | 1075.475 | 0.514215 | 0.118923 | 4.323925 | 1.53E-05 | 7.14E-05 | 915.0418 | 927.3156 | 817.4844 | 1270.08  | 1172.233 | 1350.692 |
| 4894  | IGF2R     | 21986.65 | 0.513976 | 0.108312 | 4.745337 | 2.08E-06 | 1.13E-05 | 17631.9  | 19568.33 | 17140.04 | 24488.67 | 23767.66 | 29323.29 |
| 14106 | LOC103241 | 110.6302 | 0.513807 | 0.257813 | 1.992942 | 0.046268 | 0.087199 | 88.36008 | 90.32295 | 93.228   | 156.2489 | 124.0684 | 111.5527 |
| 21029 | OVOL1     | 17.78464 | 0.513738 | 0.586423 | 0.876054 | 0.381001 | 0.481664 | 16.26259 | 12.59047 | 15.30609 | 22.32127 | 17.11289 | 23.11453 |
| 5622  | FAT1      | 91961.8  | 0.513725 | 0.117765 | 4.362305 | 1.29E-05 | 6.08E-05 | 69075.36 | 88608.46 | 69598.18 | 104729.2 | 101798.1 | 117961.5 |
| 24686 | LOC119621 | 2.105149 | 0.513525 | 1.704292 | 0.301313 | 0.763176 | 0.82187  | 0.542086 | 1.094824 | 3.478657 | 2.232127 | 4.278221 | 1.004979 |
| 6303  | KLC4      | 845.152  | 0.513204 | 0.12751  | 4.024831 | 5.70E-05 | 0.00024  | 700.3756 | 642.1141 | 750.6941 | 968.7431 | 932.6523 | 1076.333 |
| 24873 | TRNAW-CC  | 1.79609  | 0.512644 | 1.896526 | 0.270307 | 0.786924 | 0.841146 | 1.084173 | 1.094824 | 2.087194 | 2.232127 | 4.278221 | 0        |
| 6003  | SCAMP4    | 2363.822 | 0.512633 | 0.123157 | 4.162429 | 3.15E-05 | 0.000139 | 2053.965 | 1722.158 | 2074.671 | 2631.678 | 2566.933 | 3133.526 |
| 7254  | SUFU      | 422.0294 | 0.512583 | 0.1404   | 3.650874 | 0.000261 | 0.000958 | 349.1036 | 344.8694 | 349.9529 | 504.4607 | 481.2999 | 502.4897 |
| 4434  | SLC29A1   | 3321.21  | 0.512498 | 0.101382 | 5.055116 | 4.30E-07 | 2.58E-06 | 2725.068 | 2761.145 | 2732.833 | 3566.939 | 3843.982 | 4297.292 |
| 9673  | GLT8D2    | 269.4615 | 0.512454 | 0.174413 | 2.938166 | 0.003302 | 0.009074 | 213.582  | 242.5034 | 211.5023 | 301.3371 | 310.171  | 337.6731 |
| 6498  | IGF1R     | 864.7489 | 0.512109 | 0.129944 | 3.940987 | 8.11E-05 | 0.000332 | 705.2544 | 695.213  | 743.0411 | 1008.921 | 898.4265 | 1137.637 |
| 22062 | PCSK1     | 12.69683 | 0.512021 | 0.716403 | 0.714711 | 0.474788 | 0.572126 | 10.84173 | 12.04306 | 8.348776 | 22.32127 | 8.556443 | 14.06971 |
| 21263 | LOC103211 | 17.17797 | 0.511918 | 0.609159 | 0.840369 | 0.400702 | 0.500995 | 13.01007 | 16.42235 | 12.52316 | 26.78552 | 19.252   | 15.07469 |
| 5709  | PLEKHG5   | 1285.514 | 0.511633 | 0.118391 | 4.321568 | 1.55E-05 | 7.21E-05 | 1076.041 | 1018.733 | 1090.907 | 1450.883 | 1386.144 | 1690.375 |
| 5786  | LOC119611 | 913.6782 | 0.5112   | 0.119396 | 4.281558 | 1.86E-05 | 8.53E-05 | 775.1835 | 698.4975 | 789.6551 | 1062.492 | 1024.634 | 1131.607 |
| 7067  | ABHD14B   | 593.4814 | 0.511057 | 0.13792  | 3.705457 | 0.000211 | 0.000794 | 472.1571 | 500.3344 | 500.2309 | 647.3168 | 660.9852 | 779.8641 |
| 5654  | PUF60     | 7167.833 | 0.511041 | 0.117616 | 4.345011 | 1.39E-05 | 6.55E-05 | 6378.188 | 5056.443 | 6304.718 | 8218.692 | 7831.284 | 9217.672 |
| 4301  | LRP12     | 2397.377 | 0.511009 | 0.099151 | 5.153848 | 2.55E-07 | 1.58E-06 | 1928.743 | 2106.441 | 1899.347 | 2689.713 | 2804.374 | 2955.645 |
| 4600  | PLEKHA2   | 1781.05  | 0.511    | 0.103386 | 4.942638 | 7.71E-07 | 4.45E-06 | 1458.754 | 1538.775 | 1412.335 | 2093.735 | 1963.704 | 2218.995 |
| 23664 | LOC119611 | 4.816193 | 0.510951 | 1.110328 | 0.460181 | 0.645387 | 0.725051 | 4.878777 | 4.926706 | 2.087194 | 6.696381 | 4.278221 | 6.029877 |
| 4680  | MYCBP2    | 8054.733 | 0.510806 | 0.104316 | 4.89673  | 9.74E-07 | 5.54E-06 | 6309.343 | 7346.267 | 6279.671 | 9075.828 | 9031.325 | 10285.96 |
| 24429 | CTAGE1    | 3.626533 | 0.510698 | 1.501288 | 0.340173 | 0.733726 | 0.798482 | 1.084173 | 5.474118 | 2.087194 | 6.696381 | 6.417332 | 0        |
| 18836 | ERBB3     | 40.91823 | 0.510602 | 0.420923 | 1.213053 | 0.22511  | 0.317706 | 28.18849 | 37.224   | 34.78657 | 49.10679 | 62.03421 | 34.1693  |
| 8223  | PPP1R13B  | 714.1367 | 0.510573 | 0.152862 | 3.340093 | 0.000838 | 0.002708 | 530.1605 | 708.8983 | 528.7558 | 841.5119 | 802.1665 | 873.3272 |
| 4955  | SFXN5     | 1682.654 | 0.510535 | 0.108378 | 4.710687 | 2.47E-06 | 1.32E-05 | 1440.866 | 1352.655 | 1373.374 | 2055.789 | 1781.879 | 2091.362 |
| 4125  | PLPPR5    | 2175.205 | 0.510455 | 0.096807 | 5.272931 | 1.34E-07 | 8.65E-07 | 1749.855 | 1907.73  | 1724.718 | 2515.607 | 2609.715 | 2543.603 |
| 6657  | ZBTB47    | 1094.342 | 0.510152 | 0.1317   | 3.873603 | 0.000107 | 0.000428 | 957.3245 | 834.803  | 921.1483 | 1107.135 | 1315.553 | 1430.086 |
| 5587  | ERAP2     | 1483.216 | 0.510089 | 0.116497 | 4.378557 | 1.19E-05 | 5.68E-05 | 1135.129 | 1371.814 | 1164.654 | 1669.631 | 1788.297 | 1769.769 |
| 6319  | SYNGR1    | 1485.516 | 0.510012 | 0.12697  | 4.016782 | 5.90E-05 | 0.000248 | 1308.054 | 1052.126 | 1320.498 | 1636.149 | 1721.984 | 1874.287 |
| 4499  | B2M       | 33860.27 | 0.509978 | 0.101766 | 5.011273 | 5.41E-07 | 3.20E-06 | 26742.75 | 26130.7  | 30934.3  | 40714    | 42016.41 | 36623.46 |
| 24473 | LOC103211 | 2.417629 | 0.509828 | 1.524753 | 0.334368 | 0.738102 | 0.8018   | 2.710432 | 1.094824 | 2.087194 | 4.464254 | 2.139111 | 2.009959 |
| 23323 | SMIM33    | 6.594247 | 0.509554 | 0.998365 | 0.510388 | 0.60978  | 0.695035 | 2.710432 | 6.568942 | 6.957314 | 4.464254 | 12.83466 | 6.029877 |
| 4763  | ITGB1     | 79497.45 | 0.509465 | 0.105344 | 4.836202 | 1.32E-06 | 7.39E-06 | 61937.16 | 75044.14 | 59834.99 | 91615.42 | 91295.1  | 97257.89 |
| 6812  | SLC46A3   | 634.2162 | 0.509035 | 0.13351  | 3.812715 | 0.000137 | 0.000536 | 504.6824 | 575.8772 | 491.1863 | 720.977  | 733.715  | 778.8591 |
| 6163  | KBTBD4    | 1068.763 | 0.508969 | 0.124363 | 4.092589 | 4.27E-05 | 0.000184 | 960.577  | 816.191  | 873.8386 | 1178.563 | 1208.598 | 1374.812 |
| 14462 | LOC119621 | 99.31219 | 0.508968 | 0.263431 | 1.932074 | 0.05335  | 0.098072 | 91.07051 | 74.99542 | 80.00911 | 107.1421 | 124.0684 | 118.5876 |
| 5606  | FJX1      | 1484.971 | 0.508571 | 0.116364 | 4.370504 | 1.24E-05 | 5.88E-05 | 1235.957 | 1207.043 | 1239.793 | 1765.612 | 1535.881 | 1925.541 |
| 15244 | VPS37D    | 116.025  | 0.508483 | 0.284197 | 1.789193 | 0.073584 | 0.128327 | 109.5014 | 68.97389 | 108.5341 | 160.7131 | 119.7902 | 128.6374 |
| 7053  | MAP3K6    | 724.4446 | 0.508023 | 0.136896 | 3.711008 | 0.000206 | 0.000778 | 591.9583 | 592.2996 | 615.7223 | 754.4589 | 821.4185 | 970.8102 |
| 16605 | LOC119611 | 76.47076 | 0.507763 | 0.326237 | 1.556425 | 0.119607 | 0.191482 | 60.17159 | 82.11177 | 46.614   | 91.51721 | 91.98176 | 86.42823 |
| 27122 | LOC119621 | 0.3738   | 0.50776  | 4.021111 | 0.126273 | 0.899515 | NA       | 0.542086 | 0        | 0.695731 | 0        | 0        | 1.004979 |
| 27151 | LOC119621 | 0.3738   | 0.50776  | 4.021111 | 0.126273 | 0.899515 | NA       | 0.542086 | 0        | 0.695731 | 0        | 0        | 1.004979 |
| 6553  | CTR9      | 3537.313 | 0.507667 | 0.129561 | 3.918366 | 8.92E-05 | 0.000362 | 2705.553 | 3489.75  | 2570.727 | 4031.221 | 3959.494 | 4467.134 |
| 10016 | RSPH3     | 329.8922 | 0.507564 | 0.177634 | 2.857357 | 0.004272 | 0.011339 | 267.7907 | 310.9299 | 240.0273 | 341.5154 | 400.0137 | 419.0764 |
| 4772  | PIK3R4    | 4230.997 | 0.507497 | 0.105076 | 4.829787 | 1.37E-06 | 7.61E-06 | 3467.184 | 3693.935 | 3326.987 | 5006.661 | 4464.324 | 5426.889 |
| 4370  | TMF1      | 5545.538 | 0.507492 | 0.099507 | 5.100083 | 3.40E-07 | 2.07E-06 | 4464.081 | 5042.758 | 4233.525 | 6243.259 | 6703.973 | 6585.63  |
| 11583 | STK32C    | 181.7576 | 0.507485 | 0.203133 | 2.498296 | 0.012479 | 0.028642 | 165.8784 | 139.0426 | 144.7121 | 220.9806 | 213.9111 | 206.0208 |
| 5609  | HK2       | 12190.55 | 0.507439 | 0.116158 | 4.368522 | 1.25E-05 | 5.93E-05 | 9136.324 | 11613.34 | 9459.859 | 13886.06 | 13412.22 | 15635.47 |
| 25203 | LOC119621 | 1.197128 | 0.507354 | 2.365757 | 0.214457 | 0.83019  | 0.875679 | 0        | 1.642235 | 1.391463 | 0        | 2.139111 | 2.009959 |
| 5635  | LMF2      | 1892.12  | 0.507158 | 0.116411 | 4.35663  | 1.32E-05 | 6.23E-05 | 1604.034 | 1455.568 | 1632.186 | 2363.822 | 1944.452 | 2352.657 |
| 24430 | LOC119621 | 2.683271 | 0.507036 | 1.490798 | 0.34011  | 0.733774 | 0.798501 | 2.168345 | 2.189647 | 2.087194 | 2.232127 | 6.417332 | 1.004979 |
| 4097  | SDF4      | 3434.909 | 0.506892 | 0.09565  | 5.299428 | 1.16E-07 | 7.54E-07 | 2880.105 | 2975.183 | 2660.477 | 3979.882 | 3871.79  | 4242.018 |
| 5248  | SLC39A14  | 13660.49 | 0.506678 | 0.111271 | 4.553544 | 5.27E-06 | 2.67E-05 | 12338.43 | 10308.31 | 11217.97 | 15421.77 | 14657.19 | 18019.28 |
| 9609  | MAML3     | 520.7098 | 0.506609 | 0.17121  | 2.958991 | 0.003086 | 0.008539 | 371.3292 | 527.1576 | 393.784  | 582.5851 | 586.1163 | 663.2864 |
| 4087  | CLTB      | 3561.324 | 0.506591 | 0.095475 | 5.305998 | 1.12E-07 | 7.29E-07 | 2829.149 | 3167.872 | 2830.931 | 4270.059 | 4010.833 | 4259.103 |
| 4886  | PREX1     | 2424.87  | 0.506513 | 0.106664 | 4.748671 | 2.05E-06 | 1.11E-05 | 2060.47  | 1996.411 | 1959.18  | 2832.569 | 2569.072 | 3131.516 |
| 3580  | MORF4L1   | 8968.019 | 0.506487 | 0.087713 | 5.774343 | 7.73E-09 | 5.74E-08 | 6950.089 | 7846.601 | 7430.411 | 10613.76 | 10725.5  | 10241.75 |
| 4329  | DOP1A     | 1954.297 | 0.506416 | 0.098684 | 5.131677 | 2.87E-07 | 1.76E-06 | 1610.539 | 1655.921 | 1582.093 | 2225.431 | 2209.701 | 2442.1   |
| 7747  | EME2      | 972.9736 | 0.505982 | 0.145451 | 3.47872  | 0.000504 | 0.001729 | 869.5065 | 682.6225 | 863.4026 | 1178.563 | 992.5473 | 1251.199 |
| 11556 | SETD1B    | 228.4401 | 0.505949 | 0.202082 | 2.503681 | 0.012291 | 0.028277 | 162.6259 | 204.732  | 200.3706 | 225.4448 | 293.0582 | 284.4092 |
| 7369  | TSPAN7    | 628.0982 | 0.505445 | 0.140031 | 3.609529 | 0.000307 | 0.001107 | 492.7565 | 572.5928 | 495.3607 | 691.9594 | 705.9065 | 810.0135 |
| 6720  | ZNF16     | 956.3415 | 0.505229 | 0.131284 | 3.848366 | 0.000119 | 0.00047  | 865.7119 | 722.0362 | 786.8722 | 995.5286 | 1167.954 | 1199.945 |
| 7421  | DGKH      | 546.2234 | 0.505081 | 0.140626 | 3.591649 | 0.000329 | 0.001177 | 487.8777 | 441.2139 | 427.8748 | 584.8    |          |          |



|       |           |          |          |          |          |          |          |          |          |          |          |          |          |
|-------|-----------|----------|----------|----------|----------|----------|----------|----------|----------|----------|----------|----------|----------|
| 22335 | ALOX15    | 12.35993 | 0.504766 | 0.754375 | 0.669118 | 0.50342  | 0.599213 | 5.420864 | 13.6853  | 11.1317  | 15.62489 | 19.252   | 9.044815 |
| 16709 | GLIS1     | 70.78221 | 0.50474  | 0.327567 | 1.540873 | 0.123348 | 0.196253 | 67.21871 | 45.98259 | 61.92009 | 73.66019 | 100.5382 | 75.37346 |
| 22907 | LOC119621 | 8.432193 | 0.504562 | 0.871927 | 0.578674 | 0.562809 | 0.65318  | 4.878777 | 10.94824 | 4.87012  | 11.16063 | 10.69555 | 8.039836 |
| 23264 | LOC119621 | 6.581277 | 0.504496 | 0.969941 | 0.52013  | 0.602973 | 0.689072 | 5.96295  | 6.02153  | 4.174388 | 4.464254 | 12.83466 | 6.029877 |
| 4821  | ERMP1     | 2880.795 | 0.504496 | 0.105109 | 4.79972  | 1.59E-06 | 8.76E-06 | 2470.83  | 2440.909 | 2240.255 | 3156.228 | 3262.144 | 3714.404 |
| 7662  | USP20     | 1949.353 | 0.504343 | 0.143846 | 3.506139 | 0.000455 | 0.001578 | 1745.518 | 1400.279 | 1696.193 | 2254.448 | 1912.365 | 2687.315 |
| 9935  | AAMDC     | 286.335  | 0.504284 | 0.175243 | 2.877627 | 0.004007 | 0.010722 | 236.3497 | 218.4173 | 253.942  | 332.5869 | 372.2053 | 304.5088 |
| 8485  | TBC1D25   | 471.696  | 0.503995 | 0.15464  | 3.259143 | 0.001117 | 0.003501 | 355.0666 | 433.5502 | 384.0437 | 560.2639 | 496.2737 | 600.9777 |
| 21907 | LOC103221 | 15.33852 | 0.503894 | 0.677913 | 0.743302 | 0.457299 | 0.55495  | 13.55216 | 8.211177 | 16.00182 | 13.39276 | 27.80844 | 13.06473 |
| 16044 | TMEM160   | 85.4883  | 0.503433 | 0.303722 | 1.657544 | 0.097409 | 0.161398 | 81.31296 | 52.55153 | 77.92191 | 107.1421 | 100.5382 | 93.46309 |
| 10158 | SELPLG    | 298.7568 | 0.502902 | 0.178092 | 2.823836 | 0.004745 | 0.012418 | 234.7234 | 283.5593 | 224.7212 | 334.819  | 335.8404 | 378.8773 |
| 20309 | LOC119621 | 36.07521 | 0.5028   | 0.51457  | 0.977127 | 0.328507 | 0.430023 | 22.76763 | 21.89647 | 45.22254 | 22.32127 | 62.03421 | 42.20914 |
| 3942  | RAB9A     | 2533.108 | 0.502548 | 0.092854 | 5.412213 | 6.23E-08 | 4.20E-07 | 2055.049 | 2035.825 | 2196.424 | 3026.764 | 3003.311 | 2881.276 |
| 28347 | LOC119615 | 0.374687 | 0.502185 | 4.017799 | 0.12499  | 0.900531 | NA       | 0        | 0.547412 | 0.695731 | 0        | 0        | 1.004979 |
| 28743 | LOC119620 | 0.374687 | 0.502185 | 4.017799 | 0.12499  | 0.900531 | NA       | 0        | 0.547412 | 0.695731 | 0        | 0        | 1.004979 |
| 28920 | LOC119621 | 0.374687 | 0.502185 | 4.017799 | 0.12499  | 0.900531 | NA       | 0        | 0.547412 | 0.695731 | 0        | 0        | 1.004979 |
| 28975 | LOC119621 | 0.374687 | 0.502185 | 4.017799 | 0.12499  | 0.900531 | NA       | 0        | 0.547412 | 0.695731 | 0        | 0        | 1.004979 |
| 21624 | LOC119618 | 15.14231 | 0.501855 | 0.638128 | 0.786448 | 0.431605 | 0.530624 | 12.46799 | 10.40082 | 14.61036 | 22.32127 | 14.97377 | 16.07967 |
| 5401  | PDLIM4    | 1822.477 | 0.501734 | 0.11243  | 4.46264  | 8.10E-06 | 3.98E-05 | 1528.141 | 1503.193 | 1500.693 | 2113.824 | 1910.226 | 2378.786 |
| 24296 | LOC119615 | 3.317118 | 0.501635 | 1.382981 | 0.36272  | 0.716814 | 0.784347 | 3.794605 | 2.737059 | 1.391463 | 6.696381 | 4.278221 | 1.004979 |
| 6667  | SWAP70    | 2234.664 | 0.501422 | 0.129552 | 3.870443 | 0.000109 | 0.000433 | 1720.582 | 2199.501 | 1631.49  | 2511.143 | 2609.715 | 2735.554 |
| 10071 | SV2A      | 251.1741 | 0.501306 | 0.176162 | 2.845712 | 0.004431 | 0.011697 | 202.1982 | 210.2061 | 210.1109 | 323.6584 | 284.5017 | 276.3694 |
| 24053 | LOC103238 | 4.262687 | 0.501205 | 1.260296 | 0.397689 | 0.69086  | 0.763585 | 3.252518 | 4.926706 | 2.087194 | 11.16063 | 2.139111 | 2.009959 |
| 17652 | TPGS1     | 65.2975  | 0.500896 | 0.358692 | 1.396454 | 0.162578 | 0.244864 | 53.12446 | 37.77142 | 70.9646  | 75.89232 | 87.70354 | 66.32864 |
| 14629 | LOC119620 | 124.292  | 0.500836 | 0.263389 | 1.901506 | 0.057236 | 0.104014 | 106.2489 | 96.89189 | 104.3597 | 191.9629 | 117.6511 | 128.6374 |
| 5520  | LRP1      | 12904.38 | 0.50055  | 0.113662 | 4.403841 | 1.06E-05 | 5.12E-05 | 10301.81 | 10932.91 | 10838.1  | 14066.86 | 13609.02 | 17677.59 |
| 25060 | TRNAL-CA1 | 1.828974 | 0.499882 | 2.115725 | 0.23627  | 0.813223 | 0.862711 | 0        | 0.547412 | 4.174388 | 2.232127 | 0        | 4.019918 |
| 5722  | SH3BP5L   | 1598.237 | 0.499854 | 0.115908 | 4.31251  | 1.61E-05 | 7.50E-05 | 1403.462 | 1214.159 | 1358.763 | 1886.147 | 1704.871 | 2022.019 |
| 4313  | TSPAN14   | 3042.886 | 0.499768 | 0.097115 | 5.146137 | 2.66E-07 | 1.64E-06 | 2581.957 | 2578.31  | 2407.231 | 3513.368 | 3360.543 | 3815.907 |
| 9112  | PIPOX     | 416.3062 | 0.499714 | 0.162246 | 3.079978 | 0.00207  | 0.00604  | 309.5313 | 401.8003 | 322.8194 | 499.9964 | 481.2999 | 482.3901 |
| 5062  | SLC12A4   | 4699.867 | 0.49969  | 0.107375 | 4.65371  | 3.26E-06 | 1.71E-05 | 4145.334 | 3575.147 | 3967.06  | 5468.711 | 5014.075 | 6028.872 |
| 14537 | GNRH1     | 101.3362 | 0.499397 | 0.260213 | 1.919185 | 0.054961 | 0.100512 | 88.90216 | 78.8273  | 84.1835  | 131.6955 | 104.8164 | 119.5926 |
| 6653  | TRIM26    | 1350.029 | 0.499288 | 0.128792 | 3.876695 | 0.000106 | 0.000423 | 1014.786 | 1288.607 | 1055.424 | 1515.614 | 1527.325 | 1698.415 |
| 15779 | LOC119624 | 87.79107 | 0.49915  | 0.292719 | 1.705218 | 0.088154 | 0.14852  | 83.4813  | 59.12048 | 75.83472 | 89.28508 | 115.512  | 103.5129 |
| 22165 | CDCP1     | 12.07776 | 0.498991 | 0.715448 | 0.697452 | 0.48552  | 0.582339 | 11.38381 | 9.853413 | 8.348776 | 17.85702 | 14.97377 | 10.04979 |
| 9652  | LOC119618 | 848.3792 | 0.498915 | 0.169355 | 2.945965 | 0.003219 | 0.008868 | 657.0087 | 595.0366 | 860.6197 | 1051.332 | 827.8358 | 1098.443 |
| 23736 | LOC119615 | 5.17512  | 0.498669 | 1.114385 | 0.447484 | 0.654526 | 0.733088 | 5.96295  | 3.284471 | 3.478657 | 11.16063 | 2.139111 | 5.024897 |
| 21623 | LOC103221 | 15.98374 | 0.498563 | 0.633897 | 0.786505 | 0.431572 | 0.530608 | 17.88885 | 9.853413 | 11.82743 | 17.85702 | 21.39111 | 17.08465 |
| 20652 | CHADL     | 25.86128 | 0.498316 | 0.536862 | 0.928202 | 0.353303 | 0.454801 | 25.47806 | 16.42235 | 22.95914 | 15.62489 | 38.50399 | 36.17926 |
| 13139 | BBOF1     | 199.8555 | 0.49822  | 0.228327 | 1.182041 | 0.029106 | 0.058881 | 160.9997 | 188.3097 | 144.7121 | 238.8376 | 282.3626 | 183.9112 |
| 12396 | IL15RA    | 174.0219 | 0.497893 | 0.214434 | 2.321897 | 0.020239 | 0.043404 | 147.9896 | 154.3701 | 132.189  | 200.8914 | 177.5462 | 231.1453 |
| 20958 | LOC119621 | 22.7718  | 0.49622  | 0.561192 | 0.884224 | 0.376575 | 0.477682 | 17.34676 | 12.59047 | 26.43779 | 33.4819  | 25.66933 | 21.10457 |
| 5023  | PLPBP     | 1277.766 | 0.495796 | 0.106023 | 4.676311 | 2.92E-06 | 1.55E-05 | 1039.722 | 1097.561 | 1046.38  | 1502.221 | 1413.952 | 1566.763 |
| 18347 | TEX101    | 44.54569 | 0.495573 | 0.388954 | 1.274118 | 0.202622 | 0.293601 | 37.40396 | 29.56024 | 43.83108 | 58.0353  | 49.19955 | 49.24399 |
| 21522 | GDF6      | 22.43748 | 0.495353 | 0.618565 | 0.80081  | 0.423242 | 0.522808 | 14.09425 | 19.15941 | 21.56767 | 31.24978 | 38.50399 | 10.04979 |
| 24071 | LOC119624 | 3.638589 | 0.494927 | 1.255338 | 0.394258 | 0.693391 | 0.765809 | 3.252518 | 1.642235 | 4.174388 | 4.464254 | 4.278221 | 4.019918 |
| 4631  | RPN2      | 18112.22 | 0.494709 | 0.100362 | 4.929226 | 8.26E-07 | 4.74E-06 | 14502.98 | 16679.64 | 13931.32 | 20890.48 | 20165.4  | 22503.5  |
| 10653 | MMAA      | 257.0338 | 0.494636 | 0.183018 | 2.702663 | 0.006879 | 0.017166 | 195.1511 | 234.2923 | 208.7194 | 323.6584 | 308.0319 | 272.3494 |
| 9154  | ATP8B1    | 848.085  | 0.494614 | 0.161308 | 3.066277 | 0.002167 | 0.006295 | 618.5205 | 875.3115 | 618.5052 | 1046.868 | 911.2611 | 1018.044 |
| 23663 | LOC119620 | 5.400111 | 0.494285 | 1.073998 | 0.460229 | 0.645352 | 0.725051 | 3.794605 | 5.474118 | 4.174388 | 2.232127 | 10.69555 | 6.029877 |
| 19031 | LOC103221 | 45.07453 | 0.493373 | 0.418349 | 1.179333 | 0.238266 | 0.332841 | 41.19856 | 29.56024 | 40.35242 | 53.57105 | 70.59065 | 35.17428 |
| 11443 | TSPAN4    | 1288.85  | 0.493226 | 0.195158 | 2.52732  | 0.011494 | 0.026703 | 1321.064 | 719.2991 | 1174.395 | 1464.275 | 1330.527 | 1723.54  |
| 6271  | NBEAL2    | 1456.042 | 0.493167 | 0.122012 | 4.041947 | 5.30E-05 | 0.000225 | 1227.826 | 1139.164 | 1268.318 | 1602.667 | 1563.69  | 1934.585 |
| 8911  | PANX1     | 475.7452 | 0.492907 | 0.156916 | 3.141215 | 0.001682 | 0.00502  | 395.181  | 437.382  | 353.4315 | 604.9064 | 487.7172 | 575.8532 |
| 4221  | MICU1     | 4941.965 | 0.492895 | 0.094732 | 5.203075 | 1.96E-07 | 1.23E-06 | 4244.536 | 4024.572 | 4054.722 | 5618.264 | 5437.619 | 6272.077 |
| 4106  | MKRN1     | 3095.76  | 0.492668 | 0.093108 | 5.291373 | 1.21E-07 | 7.86E-07 | 2558.106 | 2669.18  | 2493.501 | 3537.921 | 3488.889 | 3826.962 |
| 9220  | SPATA6    | 332.3217 | 0.49262  | 0.16153  | 3.049719 | 0.002291 | 0.006605 | 275.3799 | 266.5896 | 283.8584 | 412.9435 | 406.431  | 348.7279 |
| 23230 | LOC119620 | 9.173134 | 0.492321 | 0.937911 | 0.524912 | 0.599644 | 0.686248 | 5.96295  | 3.284471 | 13.2189  | 17.85702 | 10.69555 | 4.019918 |
| 7523  | LOC103221 | 863.2368 | 0.492148 | 0.138594 | 3.550998 | 0.000384 | 0.001356 | 700.9177 | 827.1393 | 624.7668 | 968.7431 | 1009.66  | 1048.194 |
| 5307  | SGMS2     | 5948.736 | 0.492087 | 0.109017 | 4.513846 | 6.37E-06 | 3.19E-05 | 4649.475 | 5541.45  | 4644.703 | 6888.344 | 6462.253 | 7506.192 |
| 23302 | LOC103228 | 6.659048 | 0.491804 | 0.957462 | 0.513653 | 0.607494 | 0.693084 | 4.878777 | 8.211177 | 3.478657 | 8.928508 | 6.417332 | 8.039836 |
| 6441  | UBA7      | 1726.92  | 0.491731 | 0.124038 | 3.964365 | 7.36E-05 | 0.000304 | 1530.852 | 1290.25  | 1490.952 | 1821.416 | 1965.843 | 2262.209 |
| 17803 | LOC119621 | 64.20414 | 0.491583 | 0.35726  | 1.375979 | 0.168828 | 0.252436 | 44.45108 | 61.85754 | 52.17985 | 80.35657 | 94.12087 | 52.25893 |
| 5912  | R3HCC1L   | 1109.668 | 0.491505 | 0.116869 | 4.205602 | 2.60E-05 | 0.000117 | 922.631  | 931.1475 | 918.3654 | 1279.009 | 1180.789 | 1426.066 |
| 8126  | NIPSNAP3  | 669.2583 | 0.491372 | 0.145735 | 3.371672 | 0.000747 | 0.002444 | 604.4263 | 474.0586 | 588.5887 | 801.3336 | 823.5576 | 723.5852 |
| 5170  | WBP2      | 3266.878 | 0.491345 | 0.106941 | 4.594559 | 4.34E-06 | 2.23E-05 | 2544.011 | 2890.334 | 2719.614 | 3571.403 | 3660.018 | 4215.889 |
| 5126  | SSR3      | 8859.024 | 0.491298 | 0.106428 | 4.616241 | 3.91E-06 | 2.03E-05 | 8008.784 | 6354.356 | 7732.358 | 10424.03 | 10276.29 | 10358.32 |
| 3504  | EIF3H     | 9548.578 | 0.491268 | 0.083971 | 5.850431 | 4.90E-09 | 3.72E-08 | 7791.949 | 8396.202 | 7627.303 | 11189.65 | 11001.45 | 11284.91 |
| 22207 | GPRIN2    | 28.01019 | 0.491245 | 0.7109   | 0.691019 | 0.489554 | 0.586067 | 15.7205  | 13.6853  | 39.65669 | 26.78552 | 64.17332 | 8.039836 |
| 6988  | CGN       | 1144.42  | 0.491185 | 0.131401 | 3.738067 | 0.000185 | 0.000705 | 881.4324 | 1081.686 | 894.7105 | 1        |          |          |



|       |           |          |          |          |          |          |          |          |          |          |          |          |          |
|-------|-----------|----------|----------|----------|----------|----------|----------|----------|----------|----------|----------|----------|----------|
| 7783  | SLC36A1   | 589.3358 | 0.489851 | 0.141168 | 3.469978 | 0.000521 | 0.001778 | 490.0461 | 515.1145 | 468.9229 | 687.4951 | 609.6465 | 764.7894 |
| 4299  | SERF2     | 6232.261 | 0.489805 | 0.09499  | 5.156364 | 2.52E-07 | 1.56E-06 | 4897.208 | 5530.502 | 5120.583 | 7700.838 | 7296.506 | 6847.93  |
| 22304 | LOC119621 | 12.34153 | 0.489765 | 0.726132 | 0.674485 | 0.500003 | 0.595973 | 13.01007 | 9.306001 | 8.348776 | 8.928508 | 21.39111 | 13.06473 |
| 7800  | PFKL      | 3896.985 | 0.489758 | 0.141344 | 3.465015 | 0.00053  | 0.001807 | 3577.77  | 2592.542 | 3559.362 | 4562.468 | 4023.667 | 5066.102 |
| 8279  | RNASEK    | 1603.977 | 0.489509 | 0.147419 | 3.320517 | 0.000899 | 0.002885 | 1170.907 | 1659.205 | 1171.612 | 1948.647 | 1852.47  | 1821.023 |
| 18438 | LOC119621 | 67.38699 | 0.489474 | 0.388952 | 1.258444 | 0.208231 | 0.30024  | 62.88202 | 50.36189 | 53.57132 | 58.0353  | 126.2075 | 53.26391 |
| 24892 | LOC119621 | 2.683069 | 0.489204 | 1.833456 | 0.268821 | 0.268821 | 0.843312 | 3.252518 | 3.284471 | 0        | 0        | 8.556443 | 1.004979 |
| 8200  | AFG1L     | 460.0718 | 0.489079 | 0.146173 | 3.345892 | 0.00082  | 0.002659 | 402.7702 | 344.322  | 402.1327 | 515.6213 | 551.8906 | 543.6939 |
| 5367  | FAM102B   | 1692.611 | 0.489014 | 0.109138 | 4.480676 | 7.44E-06 | 3.69E-05 | 1382.32  | 1481.844 | 1366.416 | 1870.522 | 1888.835 | 2165.731 |
| 15143 | LOC119621 | 96.22107 | 0.488509 | 0.270341 | 1.807008 | 0.070761 | 0.124228 | 79.14461 | 84.84883 | 75.83472 | 131.6955 | 96.25998 | 109.5428 |
| 6620  | CUNH11or  | 733.6217 | 0.488322 | 0.125438 | 3.892928 | 9.90E-05 | 0.000398 | 653.2141 | 588.4677 | 592.7631 | 823.6549 | 832.114  | 911.5164 |
| 10076 | MARCHF2   | 655.1374 | 0.488259 | 0.171735 | 2.843092 | 0.004468 | 0.011788 | 645.6249 | 448.8777 | 544.7577 | 752.2268 | 660.9852 | 878.3521 |
| 7825  | RUNX2     | 1085.696 | 0.488114 | 0.14111  | 3.459112 | 0.000542 | 0.001841 | 821.2608 | 1082.781 | 807.0484 | 1225.438 | 1296.301 | 1281.349 |
| 5572  | ZNRF3     | 1038.028 | 0.487509 | 0.111191 | 4.384434 | 1.16E-05 | 5.55E-05 | 867.3382 | 836.4453 | 891.9276 | 1218.741 | 1144.424 | 1269.289 |
| 17815 | LOC103231 | 61.81075 | 0.487129 | 0.354413 | 1.374466 | 0.169297 | 0.252639 | 39.03022 | 67.87906 | 47.30973 | 71.42806 | 74.86887 | 70.34856 |
| 10701 | KIF9      | 231.6917 | 0.487067 | 0.180943 | 2.691833 | 0.007106 | 0.017654 | 195.6932 | 182.2881 | 199.6749 | 279.0159 | 280.2235 | 253.2548 |
| 23658 | LOC103231 | 5.173804 | 0.487064 | 1.056402 | 0.46106  | 0.644756 | 0.724526 | 4.878777 | 3.284471 | 4.87012  | 6.696381 | 4.278221 | 7.034856 |
| 22580 | LOC119621 | 11.73559 | 0.48655  | 0.775539 | 0.62737  | 0.530417 | 0.624496 | 8.673382 | 12.59047 | 8.348776 | 4.464254 | 19.252   | 17.08465 |
| 18425 | LOC119621 | 54.40438 | 0.486369 | 0.385615 | 1.261281 | 0.207208 | 0.298975 | 38.48813 | 43.79295 | 52.17985 | 75.89232 | 74.86887 | 41.20416 |
| 9653  | FOXP4     | 358.1252 | 0.486368 | 0.165103 | 2.94584  | 0.003221 | 0.00887  | 258.5752 | 324.6152 | 310.9919 | 439.729  | 412.8484 | 401.9918 |
| 19512 | LOC103231 | 46.76216 | 0.486258 | 0.442377 | 1.099192 | 0.271684 | 0.370168 | 44.99317 | 22.9913  | 48.00546 | 55.80317 | 70.59065 | 38.18922 |
| 18437 | SCUBE1    | 51.94691 | 0.486248 | 0.386378 | 1.258479 | 0.208219 | 0.300238 | 28.73058 | 49.81448 | 51.48412 | 64.73168 | 55.61688 | 61.30375 |
| 23421 | LOC103221 | 6.04637  | 0.486155 | 0.980397 | 0.495876 | 0.619982 | 0.703677 | 5.420864 | 4.926706 | 4.87012  | 4.464254 | 8.556443 | 8.039836 |
| 17212 | CELSR3    | 79.05246 | 0.485974 | 0.331433 | 1.466284 | 0.142571 | 0.22021  | 55.29281 | 67.33165 | 73.05179 | 109.3742 | 106.9555 | 62.30873 |
| 4187  | LOC103231 | 7500.638 | 0.48593  | 0.092824 | 5.234955 | 1.65E-07 | 1.05E-06 | 6146.717 | 6589.196 | 6017.381 | 8366.012 | 8470.878 | 9413.643 |
| 5080  | SAMD4B    | 2243.239 | 0.48592  | 0.104646 | 4.643473 | 3.43E-06 | 1.79E-05 | 1707.572 | 2021.044 | 1880.562 | 2573.642 | 2571.211 | 2705.405 |
| 4785  | AK4       | 3200.245 | 0.485654 | 0.100721 | 4.821776 | 1.42E-06 | 7.91E-06 | 2633.456 | 2738.154 | 2633.343 | 3772.295 | 3386.212 | 4038.008 |
| 12440 | CDKN1C    | 177.8435 | 0.485552 | 0.209944 | 2.312765 | 0.020736 | 0.044313 | 163.168  | 134.1159 | 146.7993 | 191.9629 | 231.024  | 199.9909 |
| 23694 | LOC103221 | 5.800681 | 0.485315 | 1.068433 | 0.454231 | 0.649663 | 0.728931 | 5.96295  | 1.642235 | 6.957314 | 8.928508 | 4.278221 | 7.034856 |
| 10911 | SLC66A2   | 296.8387 | 0.485242 | 0.183173 | 2.649095 | 0.008071 | 0.019665 | 268.8748 | 204.732  | 269.248  | 357.1403 | 327.2839 | 353.7528 |
| 5633  | SH2B1     | 1644.536 | 0.484997 | 0.111296 | 4.357714 | 1.31E-05 | 6.20E-05 | 1456.044 | 1278.207 | 1381.723 | 1921.861 | 1771.184 | 2058.198 |
| 19189 | LOC119621 | 54.44634 | 0.484888 | 0.419558 | 1.15571  | 0.2478   | 0.343309 | 34.69353 | 68.97389 | 32.00364 | 53.57105 | 79.14709 | 58.28881 |
| 20295 | LOC103231 | 26.12176 | 0.484686 | 0.495352 | 0.978468 | 0.327843 | 0.42947  | 20.0572  | 19.70683 | 25.04633 | 35.71403 | 32.08666 | 24.11951 |
| 12917 | ETFBKMT   | 172.1049 | 0.48447  | 0.218399 | 2.18277  | 0.026536 | 0.054615 | 165.8784 | 122.6202 | 141.9292 | 209.8199 | 190.3808 | 202.0009 |
| 11670 | NAGLU     | 1164.632 | 0.484427 | 0.195511 | 2.477747 | 0.013221 | 0.030119 | 1154.644 | 671.1269 | 1090.211 | 1366.062 | 1120.894 | 1584.853 |
| 6029  | ITPRIPL2  | 1782.873 | 0.484325 | 0.116632 | 4.152593 | 3.29E-05 | 0.000145 | 1476.101 | 1655.373 | 1329.543 | 2015.611 | 2025.738 | 2194.875 |
| 18390 | LOC103241 | 65.08008 | 0.48427  | 0.382449 | 1.266233 | 0.20543  | 0.296958 | 39.03022 | 72.80577 | 49.39693 | 89.28508 | 87.70354 | 52.25893 |
| 9394  | ZNF836    | 364.1942 | 0.484158 | 0.160935 | 3.008409 | 0.002626 | 0.007432 | 278.0903 | 341.0376 | 290.8157 | 437.4969 | 425.683  | 412.0416 |
| 15960 | LOC119621 | 98.26328 | 0.484146 | 0.289282 | 1.673619 | 0.094206 | 0.156922 | 85.10756 | 64.04718 | 98.09812 | 100.4457 | 111.2338 | 130.6473 |
| 10261 | CDC42EP4  | 429.5979 | 0.483873 | 0.172897 | 2.798616 | 0.005132 | 0.013297 | 397.8914 | 312.0247 | 368.7376 | 453.1218 | 459.9088 | 585.903  |
| 4466  | GPI       | 21687.28 | 0.483699 | 0.096121 | 5.032175 | 4.85E-07 | 2.89E-06 | 18356.67 | 17786.5  | 18120.32 | 24997.59 | 22963.35 | 27899.24 |
| 5861  | SFMBT1    | 1794.152 | 0.48365  | 0.114158 | 4.236662 | 2.27E-05 | 0.000103 | 1427.855 | 1671.248 | 1390.071 | 1970.968 | 2171.197 | 2133.571 |
| 25243 | LOC119621 | 1.807082 | 0.483625 | 2.318683 | 0.208577 | 0.834778 | 0.879158 | 0        | 1.642235 | 2.782925 | 0        | 6.417332 | 0        |
| 7009  | TRAF3IP2  | 735.6083 | 0.483618 | 0.129666 | 3.729724 | 0.000192 | 0.000727 | 589.79   | 678.7906 | 571.8912 | 821.4227 | 883.4527 | 868.3023 |
| 22016 | LOC103231 | 17.09204 | 0.483611 | 0.668704 | 0.723207 | 0.469553 | 0.566974 | 17.88885 | 11.49565 | 12.52316 | 33.4819  | 17.11289 | 10.04979 |
| 10364 | GDF1      | 254.3552 | 0.483578 | 0.17439  | 2.772974 | 0.005555 | 0.014248 | 197.8615 | 216.2277 | 223.3298 | 292.4086 | 288.7799 | 307.5237 |
| 19610 | LOC119621 | 43.68319 | 0.483529 | 0.446038 | 1.084053 | 0.278341 | 0.377343 | 27.6464  | 52.00412 | 28.52499 | 53.57105 | 64.17332 | 36.17926 |
| 5797  | CD70      | 842.3498 | 0.483012 | 0.112983 | 4.275084 | 1.91E-05 | 8.76E-05 | 706.3385 | 705.6138 | 695.0356 | 1017.85  | 960.4607 | 968.8002 |
| 17128 | LOC119611 | 69.83633 | 0.482965 | 0.327032 | 1.476813 | 0.139726 | 0.216874 | 69.38706 | 49.81448 | 54.26705 | 91.51721 | 87.70354 | 66.32864 |
| 5274  | TEX264    | 1208.722 | 0.482867 | 0.106467 | 4.535362 | 5.75E-06 | 2.90E-05 | 1018.58  | 1026.945 | 982.3727 | 1386.151 | 1351.918 | 1486.365 |
| 18152 | S1PR5     | 56.76119 | 0.482279 | 0.36747  | 1.312431 | 0.189375 | 0.277354 | 37.94605 | 54.19377 | 48.7012  | 69.19594 | 81.28621 | 49.24399 |
| 10682 | ILVBL     | 957.7905 | 0.482192 | 0.178868 | 2.695799 | 0.007022 | 0.017476 | 902.0317 | 598.8685 | 900.9721 | 1037.939 | 990.4082 | 1316.523 |
| 5441  | ER1       | 996.6405 | 0.48184  | 0.108456 | 4.442732 | 8.88E-06 | 4.34E-05 | 825.5975 | 855.6047 | 814.0057 | 1185.259 | 1131.59  | 1167.786 |
| 24806 | LOC119621 | 1.814585 | 0.481779 | 1.723131 | 0.279595 | 0.779788 | 0.835712 | 2.168345 | 1.642235 | 0.695731 | 2.232127 | 2.139111 | 2.009959 |
| 8690  | MAST3     | 448.3044 | 0.481636 | 0.150226 | 3.206081 | 0.001346 | 0.004116 | 336.0935 | 411.1063 | 374.9992 | 504.4607 | 547.6123 | 515.5545 |
| 19659 | FZD9      | 34.60328 | 0.481584 | 0.447225 | 1.076828 | 0.281557 | 0.380751 | 33.60935 | 20.25424 | 32.69937 | 37.99376 | 44.92132 | 38.18922 |
| 9002  | ACOT13    | 1071.279 | 0.481096 | 0.154401 | 3.115887 | 0.001834 | 0.005416 | 766.5101 | 1100.845 | 814.7014 | 1169.635 | 1351.918 | 1224.065 |
| 5621  | LMNA      | 19423.22 | 0.480653 | 0.110174 | 4.362665 | 1.28E-05 | 6.08E-05 | 17450.3  | 14630.13 | 16577.89 | 22191.81 | 20454.18 | 25235.03 |
| 5837  | SPTAN1    | 23160.3  | 0.480368 | 0.112908 | 4.25451  | 2.10E-05 | 9.54E-05 | 18358.84 | 21592.66 | 18073.71 | 25952.94 | 24638.28 | 30345.36 |
| 20306 | LOC103241 | 28.92789 | 0.480321 | 0.4912   | 0.977852 | 0.328148 | 0.429617 | 28.73058 | 23.53871 | 19.48048 | 46.87467 | 27.80844 | 27.13445 |
| 4723  | SH3BGR1   | 1923.214 | 0.479684 | 0.098549 | 4.867447 | 1.13E-06 | 6.36E-06 | 1672.336 | 1510.857 | 1637.752 | 2232.127 | 2196.867 | 2289.343 |
| 16547 | LOC103241 | 73.63768 | 0.479645 | 0.306274 | 1.566062 | 0.117334 | 0.188513 | 59.08741 | 66.23683 | 59.8329  | 93.74933 | 68.45154 | 94.46807 |
| 21178 | LOC119621 | 21.30468 | 0.479579 | 0.561498 | 0.854107 | 0.393046 | 0.493401 | 15.7205  | 14.23271 | 22.95914 | 29.01765 | 27.80844 | 18.08963 |
| 9126  | TRIM21    | 742.8595 | 0.47902  | 0.155861 | 3.073373 | 0.002117 | 0.006166 | 555.0964 | 755.4283 | 551.0192 | 904.0114 | 819.2794 | 872.3222 |
| 7251  | USP12     | 3466.842 | 0.478956 | 0.131163 | 3.651602 | 0.000261 | 0.000955 | 2595.51  | 3514.384 | 2580.468 | 3910.686 | 4034.363 | 4165.64  |
| 25394 | LOC119621 | 1.246996 | 0.478874 | 2.623654 | 0.182522 | 0.855173 | 0.895252 | 1.626259 | 0        | 1.391463 | 4.464254 | 0        | 0        |
| 5839  | CTNNB1    | 38431.37 | 0.478556 | 0.112508 | 4.253524 | 2.10E-05 | 9.58E-05 | 35096.84 | 28765.94 | 32489.26 | 43292.1  | 40705.14 | 50238.92 |
| 19499 | TMEM202   | 39.75028 | 0.477742 | 0.433903 | 1.101034 | 0.270882 | 0.369299 | 30.89892 | 38.31883 | 29.22072 | 46.87467 | 62.03421 | 31.15436 |
| 7921  | CCDC97    | 641.0596 | 0.477489 | 0.139096 | 3.432791 | 0.000597 | 0.002005 | 531.7867 | 591.2048 | 487.012  | 698.6557 | 733.715  | 803.9836 |
| 5845  | DNAJC13   | 7047.017 | 0.477035 | 0.112231 | 4.250478 | 2.13E-05 | 9.70E-05 | 5584.574 |          |          |          |          |          |



|       |           |          |          |          |          |          |          |          |          |          |          |          |          |
|-------|-----------|----------|----------|----------|----------|----------|----------|----------|----------|----------|----------|----------|----------|
| 20291 | LOC119620 | 33.39623 | 0.476653 | 0.486792 | 0.979172 | 0.327495 | 0.429079 | 39.5723  | 19.15941 | 24.3506  | 37.94616 | 49.19955 | 30.14938 |
| 21774 | PAD14     | 18.2923  | 0.476649 | 0.623968 | 0.7639   | 0.444927 | 0.543234 | 16.80468 | 10.94824 | 17.39328 | 29.01765 | 23.53022 | 12.05975 |
| 9636  | KRBOX4    | 303.1172 | 0.476412 | 0.161394 | 2.951861 | 0.003159 | 0.008714 | 258.0331 | 247.9776 | 253.2462 | 350.4439 | 374.3444 | 334.6582 |
| 7287  | ELF1      | 1439.985 | 0.476339 | 0.130921 | 3.638357 | 0.000274 | 0.001001 | 1141.092 | 1369.077 | 1106.909 | 1506.686 | 1659.95  | 1856.197 |
| 21579 | LOC119618 | 18.81467 | 0.476098 | 0.601107 | 0.792036 | 0.428339 | 0.527708 | 13.01007 | 13.6853  | 20.87194 | 13.39276 | 27.80844 | 24.11951 |
| 11638 | LOC103234 | 307.0779 | 0.475979 | 0.191524 | 2.48522  | 0.012947 | 0.029575 | 226.5921 | 296.6972 | 244.8974 | 421.872  | 335.8404 | 316.5685 |
| 7686  | LOC103246 | 564.3866 | 0.47591  | 0.136087 | 3.497116 | 0.00047  | 0.001627 | 465.1101 | 470.2267 | 484.9248 | 631.6919 | 611.7857 | 722.5802 |
| 23741 | LOC119615 | 5.433589 | 0.475869 | 1.066256 | 0.446299 | 0.655381 | 0.733881 | 5.96295  | 3.284471 | 4.174388 | 4.464254 | 10.69555 | 4.019918 |
| 5044  | GLUL      | 7535.804 | 0.47558  | 0.101941 | 4.665247 | 3.08E-06 | 1.62E-05 | 5928.257 | 7063.802 | 5924.153 | 8761.098 | 8449.487 | 9088.029 |
| 18877 | DHRS12    | 42.0708  | 0.475438 | 0.39387  | 1.207095 | 0.227396 | 0.320248 | 31.9831  | 37.224   | 36.87376 | 53.57105 | 38.50399 | 54.26889 |
| 8157  | ZBTB34    | 637.1278 | 0.47521  | 0.141292 | 3.36331  | 0.00077  | 0.00251  | 520.945  | 572.0453 | 510.6668 | 669.6381 | 712.3239 | 837.1479 |
| 19955 | LOC103218 | 40.40328 | 0.475179 | 0.458245 | 1.036953 | 0.299758 | 0.399352 | 38.48813 | 29.56024 | 32.00364 | 44.64254 | 70.59065 | 27.13445 |
| 19630 | CUNH6orf1 | 43.52635 | 0.47501  | 0.379216 | 1.080265 | 0.280024 | 0.379238 | 35.7777  | 28.46541 | 43.83108 | 51.33892 | 70.59065 | 31.15436 |
| 5655  | WDR45     | 1663.917 | 0.474851 | 0.109299 | 4.3445   | 1.40E-05 | 6.56E-05 | 1484.775 | 1303.388 | 1392.158 | 1977.665 | 1790.436 | 2035.083 |
| 23951 | LOC103216 | 5.170598 | 0.474777 | 1.144573 | 0.414807 | 0.678283 | 0.752877 | 2.168345 | 8.758589 | 2.087194 | 6.696381 | 4.278221 | 7.034856 |
| 25308 | LOC119615 | 1.192158 | 0.474764 | 2.399853 | 0.197831 | 0.843178 | 0.885723 | 1.084173 | 1.094824 | 0.695731 | 0        | 4.278221 | 0        |
| 5992  | AHNAK     | 102408   | 0.474561 | 0.113865 | 4.16777  | 3.08E-05 | 0.000136 | 79547.92 | 95382.13 | 82222.23 | 112764.8 | 109096.8 | 135434   |
| 23057 | LOC119624 | 8.177353 | 0.474505 | 0.858663 | 0.552609 | 0.580531 | 0.669363 | 8.131296 | 6.568942 | 5.565851 | 8.928508 | 12.83466 | 7.034856 |
| 18055 | CUNH16orf | 57.41257 | 0.47431  | 0.355761 | 1.333225 | 0.182458 | 0.26866  | 46.07734 | 55.83601 | 41.04815 | 66.96381 | 81.28621 | 53.26391 |
| 23357 | LOC103230 | 6.701517 | 0.474218 | 0.938684 | 0.505194 | 0.613422 | 0.698179 | 4.336691 | 4.926706 | 7.653045 | 6.696381 | 8.556443 | 8.039836 |
| 16533 | LOC103218 | 75.4955  | 0.473786 | 0.301902 | 1.56934  | 0.116569 | 0.187434 | 57.46116 | 62.95236 | 68.18167 | 93.74933 | 96.25998 | 74.36848 |
| 21448 | KLHL41    | 19.11279 | 0.473772 | 0.583633 | 0.811764 | 0.416927 | 0.516785 | 12.46799 | 18.612   | 16.69755 | 17.85702 | 29.94755 | 19.09461 |
| 11041 | PRICKLE3  | 231.6609 | 0.473751 | 0.180899 | 2.618863 | 0.008822 | 0.021243 | 190.8144 | 199.8053 | 191.3261 | 247.7661 | 290.9191 | 269.3345 |
| 6621  | RAB11FIP5 | 5367.55  | 0.47354  | 0.121658 | 3.892374 | 9.93E-05 | 0.000399 | 4850.047 | 3976.947 | 4662.792 | 6107.099 | 5525.323 | 7083.095 |
| 7609  | RECQL4    | 1470.728 | 0.473395 | 0.134383 | 3.522721 | 0.000427 | 0.001492 | 1342.206 | 1045.557 | 1310.062 | 1763.38  | 1523.047 | 1840.117 |
| 9032  | MYD88     | 509.7162 | 0.473232 | 0.152419 | 3.104814 | 0.001904 | 0.005604 | 364.8241 | 457.0889 | 460.5742 | 582.5851 | 571.1425 | 622.0823 |
| 7952  | CEP70     | 693.6013 | 0.473096 | 0.138161 | 3.424236 | 0.000617 | 0.002061 | 553.4702 | 660.1786 | 529.4516 | 767.8517 | 823.5576 | 827.0981 |
| 6611  | LOC103234 | 5158.318 | 0.472964 | 0.121312 | 3.898737 | 9.67E-05 | 0.000389 | 4807.222 | 3715.284 | 4442.941 | 5939.69  | 5461.15  | 6583.621 |
| 5088  | EEF1A2    | 5985.57  | 0.472926 | 0.101935 | 4.639494 | 3.49E-06 | 1.82E-05 | 5172.046 | 4749.345 | 5124.062 | 7035.664 | 6254.76  | 7577.545 |
| 22002 | LOC103225 | 15.46937 | 0.472783 | 0.650408 | 0.726902 | 0.467286 | 0.564622 | 16.26259 | 12.59047 | 10.43597 | 11.16063 | 19.252   | 23.11453 |
| 20923 | LOC119624 | 26.84171 | 0.472765 | 0.532773 | 0.887366 | 0.374882 | 0.476306 | 21.68345 | 20.25424 | 24.3506  | 40.17829 | 38.50399 | 16.07967 |
| 4652  | STX3      | 3561.73  | 0.472366 | 0.096082 | 4.916304 | 8.82E-07 | 5.04E-06 | 2887.694 | 3219.329 | 2846.237 | 3982.115 | 4164.848 | 4270.158 |
| 22851 | TPO       | 10.61155 | 0.472195 | 0.806751 | 0.585304 | 0.558343 | 0.649629 | 9.215468 | 12.04306 | 4.87012  | 13.39276 | 17.11289 | 7.034856 |
| 5400  | MCPH1     | 1218.251 | 0.472176 | 0.105778 | 4.463854 | 8.05E-06 | 3.96E-05 | 1021.833 | 1070.19  | 969.8495 | 1415.169 | 1405.396 | 1427.071 |
| 5964  | GYS1      | 1463.177 | 0.472021 | 0.112904 | 4.18073  | 2.91E-05 | 0.00013  | 1202.348 | 1309.409 | 1170.22  | 1660.702 | 1587.22  | 1849.162 |
| 5535  | MANEAL    | 1459.678 | 0.471932 | 0.107327 | 4.397151 | 1.10E-05 | 5.27E-05 | 1276.071 | 1179.125 | 1218.226 | 1654.006 | 1608.611 | 1822.028 |
| 5175  | CRIM1     | 17152.26 | 0.471463 | 0.10268  | 4.591585 | 4.40E-06 | 2.26E-05 | 14210.25 | 15565.65 | 13352.48 | 19475.31 | 18428.44 | 21881.42 |
| 18155 | LOC119620 | 63.9789  | 0.470877 | 0.358961 | 1.311777 | 0.189595 | 0.277631 | 48.24569 | 64.04718 | 48.7012  | 49.10679 | 98.39909 | 75.37346 |
| 8429  | ABHD16A   | 1643.243 | 0.470416 | 0.14366  | 3.274509 | 0.001058 | 0.003338 | 1581.808 | 1138.617 | 1416.509 | 1881.683 | 1711.289 | 2129.551 |
| 5550  | DAPK1     | 2881.746 | 0.470209 | 0.107059 | 4.392039 | 1.12E-05 | 5.38E-05 | 2425.294 | 2443.099 | 2387.75  | 3136.138 | 3129.519 | 3768.673 |
| 5981  | BCL10     | 1464.206 | 0.470144 | 0.112708 | 4.171365 | 3.03E-05 | 0.000135 | 1160.065 | 1340.064 | 1186.222 | 1645.078 | 1642.837 | 1810.973 |
| 5128  | LAMC1     | 17552.42 | 0.470083 | 0.10187  | 4.614524 | 3.94E-06 | 2.04E-05 | 14144.12 | 16103.76 | 13911.15 | 19758.79 | 19102.26 | 22294.46 |
| 24502 | LOC119625 | 3.606164 | 0.469875 | 1.421475 | 0.330554 | 0.740981 | 0.803975 | 2.168345 | 3.284471 | 3.478657 | 0        | 10.69555 | 2.009959 |
| 7623  | SNX27     | 1298.943 | 0.46982  | 0.133503 | 3.51916  | 0.000433 | 0.00151  | 1010.449 | 1278.754 | 980.2855 | 1433.026 | 1495.238 | 1595.907 |
| 5658  | PSME4     | 6231.311 | 0.469732 | 0.108154 | 4.343158 | 1.40E-05 | 6.60E-05 | 4972.558 | 5857.306 | 4851.335 | 7031.2   | 6853.711 | 7821.755 |
| 5326  | GJB3      | 1945.436 | 0.469444 | 0.104185 | 4.50585  | 6.61E-06 | 3.30E-05 | 1611.623 | 1648.257 | 1640.535 | 2238.823 | 2079.216 | 2454.16  |
| 24223 | LOC103234 | 5.51884  | 0.469393 | 1.266403 | 0.37065  | 0.710898 | 0.780218 | 3.794605 | 2.737059 | 6.957314 | 8.928508 | 10.69555 | 0        |
| 9370  | PKDCC     | 1361.879 | 0.469116 | 0.155642 | 3.014059 | 0.002578 | 0.007313 | 1347.627 | 930.6001 | 1152.827 | 1546.864 | 1390.422 | 1802.933 |
| 15739 | LOC119618 | 95.61828 | 0.469052 | 0.27402  | 1.711742 | 0.086944 | 0.146859 | 78.60252 | 87.03848 | 76.53045 | 98.21359 | 102.6773 | 130.6473 |
| 6040  | ORC4      | 2393.736 | 0.469047 | 0.113103 | 4.14707  | 3.37E-05 | 0.000148 | 2126.063 | 1746.791 | 2150.506 | 2756.677 | 2874.965 | 2707.415 |
| 21176 | LOC103230 | 23.48376 | 0.46868  | 0.548569 | 0.854369 | 0.3929   | 0.493259 | 11.9259  | 24.63353 | 22.2634  | 29.01765 | 29.94755 | 23.11453 |
| 20443 | LOC103245 | 25.57268 | 0.468614 | 0.490444 | 0.955488 | 0.339331 | 0.441281 | 22.76763 | 22.9913  | 18.78475 | 26.78552 | 29.94755 | 32.15934 |
| 15110 | DDX60     | 105.0523 | 0.468449 | 0.258606 | 1.811443 | 0.070072 | 0.123287 | 95.94929 | 90.32295 | 77.22618 | 122.767  | 130.4858 | 113.5627 |
| 7376  | FCHSD2    | 938.2052 | 0.468388 | 0.129808 | 3.608307 | 0.000308 | 0.001111 | 754.5842 | 894.4709 | 713.1247 | 1046.868 | 1101.642 | 1118.542 |
| 14638 | HORMAD2   | 123.0676 | 0.46836  | 0.246597 | 1.899296 | 0.057526 | 0.104476 | 100.8281 | 96.89189 | 110.6213 | 167.4095 | 139.0422 | 123.6125 |
| 8078  | TMEM144   | 559.0926 | 0.468248 | 0.138135 | 3.389773 | 0.0007   | 0.002302 | 479.7464 | 429.7183 | 496.0565 | 689.7272 | 650.2896 | 609.0176 |
| 11868 | RAB32     | 1113.391 | 0.468231 | 0.192461 | 2.432868 | 0.01498  | 0.033553 | 1143.26  | 619.6702 | 1040.814 | 1209.813 | 1341.222 | 1325.568 |
| 6656  | LOC103215 | 2399.637 | 0.467901 | 0.120774 | 3.874202 | 0.000107 | 0.000427 | 2160.756 | 1826.713 | 2060.061 | 2732.123 | 2485.647 | 3132.521 |
| 5918  | PARP14    | 3787.272 | 0.467706 | 0.111296 | 4.202348 | 2.64E-05 | 0.000119 | 2997.738 | 3637.004 | 2901.896 | 4397.29  | 4280.36  | 4509.343 |
| 11917 | DHDH      | 329.8617 | 0.467677 | 0.193169 | 2.42108  | 0.015474 | 0.034521 | 306.8209 | 232.65   | 294.2944 | 379.4616 | 318.7275 | 447.2159 |
| 7184  | IMPDH1    | 1154.897 | 0.467663 | 0.127401 | 3.670804 | 0.000242 | 0.000895 | 1047.853 | 851.7728 | 1010.898 | 1374.99  | 1227.85  | 1416.016 |
| 22696 | LOC119624 | 13.18773 | 0.467659 | 0.76825  | 0.608733 | 0.542701 | 0.635694 | 8.673382 | 16.96977 | 6.957314 | 26.78552 | 10.69555 | 9.044815 |
| 16510 | LOC103248 | 106.7652 | 0.467115 | 0.296875 | 1.573436 | 0.115618 | 0.186172 | 99.74389 | 84.84883 | 82.79203 | 100.4457 | 173.268  | 99.49297 |
| 13323 | ZNFS5     | 154.1467 | 0.466933 | 0.217822 | 2.143642 | 0.032062 | 0.063992 | 121.9694 | 142.8745 | 123.8402 | 165.1774 | 186.1026 | 184.9162 |
| 22595 | LOC103235 | 14.25408 | 0.466494 | 0.745956 | 0.625364 | 0.531732 | 0.625629 | 9.757555 | 10.40082 | 15.30609 | 8.928508 | 32.08666 | 9.044815 |
| 21945 | RGCC      | 16.44079 | 0.466463 | 0.632981 | 0.73693  | 0.461165 | 0.558652 | 13.01007 | 19.15941 | 9.044508 | 20.08914 | 19.252   | 18.08963 |
| 11216 | LOC103238 | 295.4631 | 0.466449 | 0.180954 | 2.577718 | 0.009946 | 0.023572 | 224.9658 | 291.7705 | 227.5042 | 345.9797 | 335.8404 | 346.7179 |
| 20458 | LOC119618 | 28.66256 | 0.466438 | 0.489612 | 0.952669 | 0.340758 | 0.442812 | 29.81475 | 16.42235 | 25.74206 | 33.4819  | 36.36488 | 30.14938 |
| 21729 | LOC103245 | 17.8996  | 0.466351 | 0.602856 | 0.773357 | 0.439185 | 0.537334 | 15.7205  | 15.32753 | 13.91463 | 13.39276 | 29.94755 | 19.09461 |
| 25236 | FAM167B   | 1.545522 | 0.466104 | 2.224209 | 0.209559 | 0.834012 | 0.878559 | 0        | 0        |          |          |          |          |



|       |           |          |          |          |          |          |          |          |          |          |          |          |          |
|-------|-----------|----------|----------|----------|----------|----------|----------|----------|----------|----------|----------|----------|----------|
| 7324  | LZTR1     | 2071.556 | 0.464878 | 0.128204 | 3.626082 | 0.000288 | 0.001045 | 1882.124 | 1504.288 | 1840.905 | 2171.86  | 2350.883 | 2679.275 |
| 20665 | DHFR2     | 28.26626 | 0.464837 | 0.501533 | 0.926833 | 0.354013 | 0.455429 | 23.8518  | 22.9913  | 23.65487 | 26.78552 | 49.19955 | 23.11453 |
| 7781  | LOC103234 | 629.2384 | 0.464721 | 0.133918 | 3.470198 | 0.00052  | 0.001777 | 550.7598 | 507.9982 | 530.843  | 729.9055 | 660.9852 | 794.9388 |
| 15967 | TSTD3     | 114.7131 | 0.464517 | 0.277874 | 1.671683 | 0.094587 | 0.157487 | 93.23886 | 113.3142 | 80.70484 | 167.4095 | 124.0684 | 109.5428 |
| 9468  | NFKBIE    | 888.3928 | 0.464411 | 0.155118 | 2.993921 | 0.002754 | 0.007734 | 836.4393 | 608.7219 | 798.6996 | 964.2789 | 960.4607 | 1161.756 |
| 8345  | MFSD5     | 741.233  | 0.464142 | 0.140718 | 3.298376 | 0.000972 | 0.003098 | 659.7191 | 557.2652 | 656.0747 | 852.6725 | 767.9407 | 953.7255 |
| 15721 | LOC119621 | 110.4239 | 0.464123 | 0.27064  | 1.714908 | 0.086362 | 0.146043 | 83.4813  | 110.5772 | 82.79203 | 131.6955 | 145.4595 | 108.5378 |
| 7758  | PLGRKT    | 1890.165 | 0.463791 | 0.133415 | 3.476303 | 0.000508 | 0.001742 | 1662.037 | 1294.629 | 1810.293 | 2220.966 | 2205.423 | 2147.641 |
| 20025 | AIFM3     | 40.99829 | 0.46359  | 0.453053 | 1.023259 | 0.306185 | 0.406489 | 28.73058 | 22.9913  | 51.48412 | 49.10679 | 53.47777 | 40.19918 |
| 14399 | CCDC13    | 126.7217 | 0.463561 | 0.238545 | 1.943288 | 0.051981 | 0.095974 | 104.0806 | 118.7884 | 96.70666 | 156.2489 | 134.764  | 149.7419 |
| 21664 | LOC119624 | 19.21981 | 0.463469 | 0.593112 | 0.781419 | 0.434556 | 0.533266 | 16.26259 | 21.34906 | 10.43597 | 26.78552 | 21.39111 | 19.09461 |
| 21072 | LOC10321  | 25.37681 | 0.463423 | 0.532861 | 0.869688 | 0.384471 | 0.485059 | 24.39389 | 24.08612 | 16.00182 | 33.4819  | 17.11289 | 37.18424 |
| 15889 | CMPK2     | 109.7601 | 0.463404 | 0.274816 | 1.686238 | 0.09175  | 0.153513 | 111.6698 | 76.09024 | 90.44508 | 113.8385 | 119.7902 | 146.727  |
| 22077 | TMEM249   | 18.09776 | 0.463092 | 0.649644 | 0.71284  | 0.475945 | 0.57313  | 12.46799 | 10.94824 | 21.56767 | 29.01765 | 23.53022 | 11.05477 |
| 6595  | SOGA1     | 1490.402 | 0.46309  | 0.118625 | 3.903822 | 9.47E-05 | 0.000382 | 1209.937 | 1356.486 | 1197.354 | 1732.131 | 1555.133 | 1891.371 |
| 9892  | BRI3      | 2845.895 | 0.462952 | 0.160404 | 2.886169 | 0.0039   | 0.010481 | 2843.785 | 1761.024 | 2577.685 | 3178.549 | 3080.319 | 3634.006 |
| 5257  | ANXA11    | 4217.501 | 0.462817 | 0.101744 | 4.548838 | 5.39E-06 | 2.73E-05 | 3450.38  | 3711.452 | 3482.136 | 5084.785 | 4374.481 | 5201.774 |
| 24658 | TRNAM-C2  | 2.777016 | 0.4628   | 1.510146 | 0.30646  | 0.759254 | 0.818556 | 1.626259 | 0.547412 | 4.87012  | 4.464254 | 2.139111 | 3.014938 |
| 15847 | LOC103214 | 142.1033 | 0.462756 | 0.273545 | 1.691698 | 0.090703 | 0.152165 | 93.78094 | 133.5685 | 128.7103 | 189.7308 | 188.2417 | 118.5876 |
| 8612  | LOC119621 | 1488.529 | 0.462746 | 0.143454 | 3.225743 | 0.001256 | 0.003879 | 1482.606 | 1048.294 | 1222.4   | 1669.631 | 1895.252 | 1612.992 |
| 7458  | PDP2      | 979.5152 | 0.462579 | 0.129241 | 3.579202 | 0.000345 | 0.001229 | 806.6245 | 923.4837 | 742.3454 | 1053.564 | 1172.233 | 1178.841 |
| 16336 | LOC119621 | 98.19968 | 0.462455 | 0.289287 | 1.598604 | 0.109909 | 0.178864 | 71.01331 | 103.4608 | 72.35606 | 109.3742 | 130.4858 | 102.5079 |
| 6253  | CALR      | 28223.21 | 0.462234 | 0.114133 | 4.049974 | 5.12E-05 | 0.000218 | 22276.5  | 27643.2  | 21303.29 | 31990.84 | 31323    | 34802.44 |
| 8483  | ASMTL     | 717.4961 | 0.462181 | 0.141799 | 3.259404 | 0.001116 | 0.003499 | 591.4162 | 611.459  | 613.6351 | 743.2983 | 774.3581 | 970.8102 |
| 19209 | LOC103231 | 69.6135  | 0.462157 | 0.401244 | 1.151811 | 0.249399 | 0.345164 | 59.08741 | 47.07742 | 67.48594 | 120.5349 | 81.28621 | 42.20914 |
| 22587 | LOC103231 | 11.6097  | 0.462151 | 0.738112 | 0.626126 | 0.531232 | 0.625245 | 13.55216 | 8.758589 | 6.957314 | 15.62489 | 10.69555 | 14.06971 |
| 21138 | LOC119621 | 36.19334 | 0.461572 | 0.536834 | 0.859804 | 0.389897 | 0.490369 | 29.27266 | 23.53871 | 37.56949 | 78.12444 | 23.53022 | 25.12449 |
| 20488 | LOC103221 | 27.5771  | 0.461547 | 0.486346 | 0.949009 | 0.342616 | 0.444575 | 22.22554 | 19.15941 | 28.52499 | 35.71403 | 25.66933 | 34.1693  |
| 9719  | CLMN      | 540.0079 | 0.461455 | 0.157762 | 2.925007 | 0.003444 | 0.009422 | 439.09   | 531.5369 | 392.3925 | 654.0132 | 581.8381 | 641.1769 |
| 5025  | ZSWIM8    | 5152.152 | 0.461426 | 0.098698 | 4.675144 | 2.94E-06 | 1.55E-05 | 4317.718 | 4330.575 | 4365.019 | 5707.549 | 5570.244 | 6621.81  |
| 18967 | LOC119611 | 657920.7 | 0.461351 | 0.38743  | 1.190799 | 0.233732 | 0.32761  | 354745.1 | 885162.2 | 420928.6 | 764369.6 | 790795   | 731523.6 |
| 21967 | HOXA11    | 15.5347  | 0.461304 | 0.629036 | 0.73335  | 0.463345 | 0.560751 | 11.9259  | 13.13788 | 13.91463 | 15.62489 | 23.53022 | 15.07469 |
| 9298  | SH3BP2    | 479.3207 | 0.46116  | 0.152067 | 3.032604 | 0.002425 | 0.006932 | 385.9655 | 416.5804 | 410.4815 | 578.1209 | 472.7435 | 612.0325 |
| 6610  | ATP7A     | 1347.023 | 0.46106  | 0.118255 | 3.898871 | 9.66E-05 | 0.000389 | 1110.735 | 1256.31  | 1034.553 | 1595.971 | 1469.569 | 1615.003 |
| 13060 | ANKRD9    | 157.9617 | 0.460907 | 0.210009 | 2.1947   | 0.028185 | 0.057374 | 128.4745 | 129.7366 | 141.2335 | 178.5702 | 181.8244 | 187.9312 |
| 21974 | LOC103211 | 19.69795 | 0.460677 | 0.629482 | 0.731836 | 0.464269 | 0.56169  | 17.34676 | 20.25424 | 11.82743 | 11.16063 | 38.50399 | 19.09461 |
| 24822 | MTNR1A    | 2.440929 | 0.46065  | 1.66117  | 0.277305 | 0.781546 | 0.836998 | 1.626259 | 2.189647 | 2.087194 | 4.464254 | 4.278221 | 0        |
| 8021  | PPP1R2    | 4021.365 | 0.460408 | 0.135162 | 3.406352 | 0.000658 | 0.002182 | 2911.546 | 4139.528 | 3101.57  | 4830.323 | 4742.408 | 4402.815 |
| 8092  | CARMIL1   | 3228.325 | 0.460336 | 0.13608  | 3.382826 | 0.000717 | 0.002357 | 2458.362 | 3311.841 | 2383.576 | 3816.937 | 3471.777 | 3927.46  |
| 25172 | LOC103231 | 2.393001 | 0.460181 | 2.108097 | 0.218292 | 0.827201 | 0.873601 | 0        | 4.926706 | 1.391463 | 0        | 0        | 0.039836 |
| 10150 | LOC103211 | 299.9874 | 0.460023 | 0.162804 | 2.825624 | 0.004719 | 0.01236  | 252.6122 | 262.2103 | 244.2017 | 341.5154 | 331.5622 | 367.8225 |
| 8252  | MTUS1     | 895.7471 | 0.459959 | 0.138163 | 3.329099 | 0.000871 | 0.002807 | 671.1029 | 879.6908 | 712.4289 | 1002.225 | 1041.747 | 1067.288 |
| 7510  | MOSPD3    | 595.0171 | 0.459922 | 0.129368 | 3.555136 | 0.000378 | 0.001337 | 470.531  | 514.5671 | 516.9284 | 716.5128 | 680.2372 | 671.3263 |
| 4996  | TXNL1     | 4505.253 | 0.459896 | 0.098057 | 4.690079 | 2.73E-06 | 1.45E-05 | 3597.827 | 4123.653 | 3653.981 | 5287.909 | 5422.646 | 4945.504 |
| 22847 | LOC103241 | 11.91774 | 0.459894 | 0.785248 | 0.585667 | 0.5581   | 0.64941  | 7.589209 | 12.04306 | 9.740239 | 17.85702 | 19.252   | 5.024897 |
| 9635  | STARD10   | 496.932  | 0.459891 | 0.155785 | 2.952087 | 0.003156 | 0.008709 | 447.7633 | 372.7874 | 436.2236 | 620.5313 | 496.2737 | 608.0126 |
| 10708 | CHMP4B    | 2729.141 | 0.459823 | 0.17097  | 2.689494 | 0.007156 | 0.017765 | 1906.518 | 3101.635 | 1885.432 | 3111.585 | 3114.545 | 3255.129 |
| 7423  | UBXN2B    | 2191.913 | 0.459771 | 0.128035 | 3.59098  | 0.000329 | 0.00118  | 1677.215 | 2197.311 | 1662.102 | 2526.768 | 2511.316 | 2576.767 |
| 3979  | LOC103241 | 4363.197 | 0.459518 | 0.085264 | 5.389378 | 7.07E-08 | 4.72E-07 | 3656.915 | 3819.84  | 3544.751 | 5095.946 | 5024.771 | 5036.957 |
| 9168  | DNAJB9    | 542.7662 | 0.459493 | 0.150044 | 3.062385 | 0.002196 | 0.006367 | 479.7464 | 392.4943 | 498.8394 | 669.6381 | 596.8119 | 619.0674 |
| 24981 | LOC119621 | 1.829659 | 0.459091 | 1.843294 | 0.24906  | 0.803314 | 0.854894 | 0.542086 | 2.189647 | 2.087194 | 0        | 2.139111 | 4.019918 |
| 5646  | PLXNB2    | 21743.1  | 0.459036 | 0.105542 | 4.349296 | 1.37E-05 | 6.43E-05 | 18849.43 | 17010.82 | 19086    | 24698.49 | 22655.32 | 28158.52 |
| 5741  | SRPRB     | 3336.337 | 0.45852  | 0.106501 | 4.305303 | 1.67E-05 | 7.72E-05 | 2997.196 | 2533.969 | 2905.374 | 3705.331 | 3730.609 | 4145.54  |
| 10525 | ZNF266    | 364.7996 | 0.45829  | 0.167335 | 2.73876  | 0.006167 | 0.015579 | 330.1306 | 262.7577 | 329.7767 | 395.0865 | 444.935  | 426.1113 |
| 14976 | LOC119621 | 115.6268 | 0.458156 | 0.24918  | 1.838656 | 0.065966 | 0.117097 | 100.286  | 99.08154 | 93.228   | 111.6063 | 151.8769 | 137.6822 |
| 23747 | LOC119611 | 8.774606 | 0.45798  | 1.029411 | 0.444895 | 0.656395 | 0.734841 | 13.01007 | 3.284471 | 5.565851 | 2.232127 | 23.53022 | 5.024897 |
| 5591  | ERF       | 1760.884 | 0.457942 | 0.104633 | 4.376668 | 1.21E-05 | 5.73E-05 | 1383.404 | 1568.882 | 1499.997 | 2107.128 | 1931.617 | 2074.278 |
| 6296  | HERC1     | 6342.365 | 0.457741 | 0.11363  | 4.028335 | 5.62E-05 | 0.000237 | 5175.299 | 6001.823 | 4861.075 | 7136.11  | 6793.815 | 8086.065 |
| 24496 | TRNAA-CG  | 3.07843  | 0.457493 | 1.37962  | 0.331608 | 0.740185 | 0.803308 | 1.084173 | 3.284471 | 3.478657 | 4.464254 | 2.139111 | 4.019918 |
| 23917 | LOC119621 | 5.542836 | 0.457229 | 1.087334 | 0.420505 | 0.674117 | 0.749316 | 5.420864 | 1.642235 | 6.957314 | 8.928508 | 4.278221 | 6.029877 |
| 12614 | PXMP4     | 405.6233 | 0.457174 | 0.200534 | 2.279775 | 0.022621 | 0.047676 | 392.4705 | 246.8827 | 388.2181 | 446.4254 | 449.2132 | 510.5296 |
| 9083  | POMGNT2   | 700.1942 | 0.457103 | 0.147992 | 3.088703 | 0.00201  | 0.005884 | 611.4734 | 549.054  | 615.7223 | 754.4589 | 718.7412 | 951.7156 |
| 24145 | LOC119611 | 5.224652 | 0.457099 | 1.191324 | 0.38369  | 0.701208 | 0.772073 | 3.252518 | 5.474118 | 4.87012  | 6.696381 | 0        | 11.05477 |
| 24792 | LOC103211 | 2.794519 | 0.456714 | 1.615653 | 0.282681 | 0.777422 | 0.833646 | 3.252518 | 2.189647 | 1.391463 | 8.928508 | 0        | 1.004979 |
| 6682  | PLD3      | 5066.816 | 0.456697 | 0.118184 | 3.864287 | 0.000111 | 0.000443 | 4568.704 | 3797.943 | 4453.377 | 5899.512 | 5168.091 | 6513.272 |
| 12944 | LOC103221 | 430.6121 | 0.456387 | 0.206095 | 2.21445  | 0.026798 | 0.055039 | 444.5108 | 272.0637 | 375.6949 | 459.8182 | 440.6568 | 590.9279 |
| 5834  | ZCHC24    | 2356.844 | 0.456251 | 0.107195 | 4.256277 | 2.08E-05 | 9.47E-05 | 2008.972 | 2006.812 | 1951.526 | 2729.891 | 2445.003 | 2998.859 |
| 9626  | SHPK      | 429.799  | 0.456247 | 0.154471 | 2.953612 | 0.003141 | 0.008673 | 398.4335 | 345.4169 | 345.7785 | 488.8358 | 455.6306 | 544.6989 |
| 6993  | LRRCA8A   | 1470.639 | 0.45587  | 0.122018 | 3.736082 | 0.000187 | 0.000711 | 1207.226 | 1361.413 | 1154.218 | 1776.773 | 1510.212 | 1813.988 |
| 6415  | BPHL      | 885.4282 | 0.455779 | 0.114704 | 3.97353  | 7.08E-05 | 0.000293 | 774.6414 | 739.5534 | 727.0393 | 1049.1   |          |          |



|       |           |          |          |          |          |          |          |          |          |          |          |          |          |
|-------|-----------|----------|----------|----------|----------|----------|----------|----------|----------|----------|----------|----------|----------|
| 16504 | TRNAK-CU  | 80.46345 | 0.454964 | 0.288927 | 1.574664 | 0.115334 | 0.185782 | 60.17159 | 70.06871 | 73.05179 | 91.51721 | 100.5382 | 87.43321 |
| 8713  | PTPRA     | 8492.674 | 0.454944 | 0.14222  | 3.198869 | 0.00138  | 0.00421  | 6205.805 | 9078.825 | 6209.402 | 9520.022 | 9857.022 | 10084.97 |
| 9221  | PRR12     | 534.5661 | 0.454765 | 0.149133 | 3.049385 | 0.002293 | 0.006611 | 412.5277 | 489.9336 | 454.3126 | 587.0494 | 571.1425 | 692.4309 |
| 18860 | LOC103232 | 48.76907 | 0.454711 | 0.375527 | 1.210863 | 0.225948 | 0.318496 | 46.61943 | 36.12918 | 41.04815 | 64.73168 | 42.78221 | 61.30375 |
| 16956 | MBOAT7    | 89.50454 | 0.4547   | 0.303429 | 1.498536 | 0.133994 | 0.210087 | 76.43418 | 57.47824 | 91.83654 | 111.6063 | 111.2338 | 88.43819 |
| 12702 | P3H3      | 318.12   | 0.454592 | 0.201301 | 2.258273 | 0.023929 | 0.050082 | 291.1004 | 201.995  | 313.7748 | 352.6761 | 357.2315 | 391.942  |
| 21161 | LOC119628 | 22.89303 | 0.454445 | 0.530489 | 0.856653 | 0.391637 | 0.492028 | 22.76763 | 18.612   | 16.00182 | 26.78552 | 32.08666 | 21.10457 |
| 12240 | LOC103231 | 196.3488 | 0.454441 | 0.192649 | 2.358911 | 0.018329 | 0.039809 | 166.9626 | 165.8658 | 163.4969 | 247.7661 | 213.9111 | 220.0905 |
| 24695 | CRYGD     | 3.379631 | 0.454427 | 1.514269 | 0.300096 | 0.764104 | 0.822583 | 0.542086 | 0.547412 | 7.653045 | 2.232127 | 4.278221 | 5.024897 |
| 17263 | LOC103221 | 76.49349 | 0.45441  | 0.311943 | 1.456709 | 0.145197 | 0.223614 | 55.8349  | 78.8273  | 59.8329  | 84.82083 | 79.14709 | 100.4979 |
| 8174  | CCDC106   | 627.6161 | 0.454279 | 0.135427 | 3.354434 | 0.000795 | 0.002587 | 553.4702 | 485.5543 | 553.1064 | 700.8879 | 688.7936 | 783.884  |
| 4982  | ATP6AP2   | 7176.412 | 0.453707 | 0.096591 | 4.697215 | 2.64E-06 | 1.41E-05 | 6460.585 | 5494.372 | 6219.838 | 8211.995 | 8040.917 | 8630.764 |
| 19420 | LOC119615 | 58.74454 | 0.453705 | 0.406921 | 1.11497  | 0.264863 | 0.362584 | 65.05036 | 31.20247 | 51.48412 | 62.49956 | 91.98176 | 50.24897 |
| 13148 | LOC103235 | 176.8389 | 0.453607 | 0.207956 | 2.181263 | 0.029164 | 0.058969 | 148.5317 | 137.9478 | 162.8011 | 183.0344 | 209.6328 | 219.0855 |
| 8203  | LOC103247 | 493.9938 | 0.453308 | 0.135512 | 3.345155 | 0.000822 | 0.002665 | 428.2482 | 423.6967 | 397.9583 | 595.9779 | 558.3079 | 559.7736 |
| 4626  | CTBP2     | 5569.827 | 0.453186 | 0.091893 | 4.931666 | 8.15E-07 | 4.69E-06 | 4809.39  | 4741.134 | 4561.911 | 6191.92  | 6169.195 | 6945.413 |
| 21172 | HTRA3     | 22.65541 | 0.453148 | 0.530129 | 0.854788 | 0.392668 | 0.493061 | 23.30971 | 14.78012 | 19.48048 | 24.5534  | 25.66933 | 28.13943 |
| 4481  | HACD3     | 6102.29  | 0.453141 | 0.090226 | 5.022313 | 5.11E-07 | 3.03E-06 | 5321.662 | 5027.978 | 5110.843 | 7006.647 | 6633.382 | 7513.227 |
| 5319  | LEPROTL1  | 1450.199 | 0.453125 | 0.100472 | 4.509953 | 6.48E-06 | 3.24E-05 | 1180.122 | 1267.806 | 1224.487 | 1714.274 | 1649.254 | 1665.251 |
| 6417  | HMGCL     | 2873.056 | 0.453096 | 0.114037 | 3.973224 | 7.09E-05 | 0.000294 | 2623.156 | 2106.441 | 2550.551 | 3243.281 | 3206.527 | 3508.383 |
| 5452  | TMED3     | 2969.62  | 0.453059 | 0.10208  | 4.438293 | 9.07E-06 | 4.42E-05 | 2682.243 | 2288.729 | 2552.638 | 3482.118 | 3266.422 | 3545.568 |
| 6561  | ZBTB1     | 1476.015 | 0.452682 | 0.115607 | 3.915691 | 9.01E-05 | 0.000365 | 1239.209 | 1379.478 | 1118.736 | 1691.952 | 1743.375 | 1683.341 |
| 25553 | LOC119628 | 0.915096 | 0.452571 | 2.87812  | 0.157245 | 0.875052 | 0.910363 | 1.084173 | 0        | 1.391463 | 0        | 0        | 3.014938 |
| 22823 | LOC119625 | 11.96376 | 0.452554 | 0.767587 | 0.589581 | 0.555472 | 0.647123 | 15.7205  | 4.926706 | 9.740239 | 15.62489 | 10.69555 | 15.07469 |
| 6673  | FZD3      | 777.8337 | 0.452527 | 0.116998 | 3.867815 | 0.00011  | 0.000437 | 644.5407 | 687.5492 | 637.9857 | 908.4757 | 892.0091 | 896.4417 |
| 7080  | UBA5      | 1654.437 | 0.452437 | 0.122189 | 3.702766 | 0.000213 | 0.000801 | 1334.617 | 1604.464 | 1253.012 | 1852.665 | 1908.087 | 1973.78  |
| 22958 | MLC1      | 10.45282 | 0.452314 | 0.793702 | 0.569879 | 0.568759 | 0.658614 | 8.673382 | 10.40082 | 6.957314 | 20.08914 | 8.556443 | 8.039836 |
| 9281  | KBTBD3    | 422.4995 | 0.452196 | 0.148891 | 3.037098 | 0.002389 | 0.006842 | 365.3662 | 328.4471 | 374.9992 | 495.5322 | 513.3866 | 457.2657 |
| 17201 | LOC103235 | 75.37831 | 0.452024 | 0.307967 | 1.467769 | 0.142167 | 0.219732 | 74.26583 | 51.45671 | 65.39875 | 89.28508 | 83.42532 | 88.43819 |
| 25247 | LOC119625 | 1.547523 | 0.451959 | 2.173933 | 0.207899 | 0.835308 | 0.879576 | 1.626259 | 2.189647 | 0        | 4.464254 | 0        | 1.004979 |
| 17586 | CTRL      | 68.24075 | 0.451879 | 0.322139 | 1.402744 | 0.160693 | 0.242922 | 53.12446 | 65.68942 | 52.87558 | 82.5887  | 89.84265 | 65.32367 |
| 23933 | ST6GALNA  | 6.439487 | 0.451839 | 1.080782 | 0.418067 | 0.675898 | 0.750763 | 4.336691 | 6.568942 | 4.87012  | 11.16063 | 10.69555 | 1.004979 |
| 5581  | FAM160B1  | 1799.374 | 0.451821 | 0.10314  | 4.380641 | 1.18E-05 | 5.64E-05 | 1602.949 | 1528.374 | 1431.119 | 2026.771 | 2017.181 | 2189.85  |
| 7381  | ZNF160    | 1671.257 | 0.451219 | 0.125101 | 3.606833 | 0.00031  | 0.001116 | 1332.273 | 1628.55  | 1232.14  | 1935.254 | 1884.556 | 1971.77  |
| 20993 | LOC103235 | 29.51372 | 0.4511   | 0.512696 | 0.879858 | 0.378936 | 0.47989  | 24.93597 | 23.53871 | 25.04633 | 49.10679 | 36.36488 | 18.08963 |
| 23105 | TRNASTOP  | 10.31834 | 0.450914 | 0.830315 | 0.543063 | 0.587086 | 0.675511 | 11.38381 | 7.663765 | 6.957314 | 4.464254 | 21.39111 | 10.04979 |
| 12034 | FBXO6     | 404.9102 | 0.450665 | 0.187738 | 2.400497 | 0.016373 | 0.03617  | 406.5648 | 263.8525 | 357.6059 | 444.1933 | 457.7697 | 499.4748 |
| 24390 | TRNAN-GL  | 4.580229 | 0.450558 | 1.294066 | 0.348172 | 0.727711 | 0.793202 | 2.168345 | 7.663765 | 1.391463 | 6.696381 | 8.556443 | 1.004979 |
| 19135 | COL20A1   | 67.33625 | 0.450427 | 0.38707  | 1.163682 | 0.244553 | 0.339767 | 60.17159 | 32.2973  | 77.92191 | 89.28508 | 77.00798 | 67.33362 |
| 21633 | SSPN      | 27.11699 | 0.450004 | 0.573692 | 0.784462 | 0.332769 | 0.531834 | 22.76763 | 19.70683 | 25.74206 | 15.62489 | 57.75599 | 21.10457 |
| 8030  | VAMP3     | 5024.732 | 0.450027 | 0.132212 | 3.403826 | 0.000664 | 0.0022   | 3695.945 | 5135.27  | 3913.489 | 5593.71  | 5533.879 | 6276.097 |
| 7992  | UBP1      | 7495.238 | 0.449815 | 0.131718 | 3.414974 | 0.000638 | 0.002122 | 5594.873 | 7737.666 | 5677.864 | 8368.244 | 8366.062 | 9226.717 |
| 7551  | ADAM9     | 10982.11 | 0.449805 | 0.127019 | 3.541246 | 0.000398 | 0.001402 | 8478.231 | 11265.74 | 8108.053 | 12667.32 | 12261.38 | 13111.97 |
| 25474 | LOC119628 | 0.911013 | 0.449721 | 2.661222 | 0.16899  | 0.865804 | 0.903529 | 1.626259 | 0        | 0.695731 | 0        | 2.139111 | 1.004979 |
| 25475 | LOC119625 | 0.911013 | 0.449721 | 2.661222 | 0.16899  | 0.865804 | 0.903529 | 1.626259 | 0        | 0.695731 | 0        | 2.139111 | 1.004979 |
| 7393  | LOC103247 | 788.4636 | 0.449291 | 0.124748 | 3.601584 | 0.000316 | 0.001137 | 643.9986 | 720.3939 | 637.2899 | 921.8684 | 853.5052 | 953.7255 |
| 7889  | COMMD9    | 1253.313 | 0.449178 | 0.13039  | 3.444887 | 0.000571 | 0.001925 | 1181.206 | 937.7164 | 1063.773 | 1453.115 | 1311.275 | 1572.793 |
| 7193  | GLB1L     | 654.3256 | 0.449133 | 0.122426 | 3.668612 | 0.000244 | 0.000901 | 560.5173 | 557.2652 | 542.6705 | 723.2091 | 776.4972 | 765.7944 |
| 9172  | OPHN1     | 414.1776 | 0.448937 | 0.146606 | 3.062195 | 0.002197 | 0.006369 | 348.5615 | 373.3349 | 329.7767 | 462.0503 | 474.8826 | 496.4599 |
| 9820  | VPS36     | 689.2549 | 0.448913 | 0.154771 | 2.900492 | 0.003726 | 0.010087 | 514.44   | 696.3078 | 539.8875 | 756.691  | 767.9407 | 860.2624 |
| 6804  | EIF2AK3   | 1779.816 | 0.448758 | 0.117596 | 3.816088 | 0.000136 | 0.00053  | 1457.128 | 1705.188 | 1353.893 | 2053.557 | 1993.651 | 2115.482 |
| 13508 | LOC103248 | 502.9392 | 0.448681 | 0.213059 | 2.105907 | 0.035212 | 0.069301 | 569.7328 | 305.4558 | 399.3498 | 575.8888 | 639.5941 | 527.6142 |
| 19403 | LOC103222 | 42.59066 | 0.448489 | 0.401553 | 1.116889 | 0.264042 | 0.361654 | 31.44101 | 39.41365 | 36.17803 | 53.57105 | 57.75599 | 37.18424 |
| 24201 | LOC103235 | 5.200855 | 0.44817  | 1.199086 | 0.37376  | 0.708583 | 0.778384 | 9.215468 | 3.284471 | 0.695731 | 6.696381 | 4.278221 | 7.034856 |
| 6650  | POP1      | 1093.38  | 0.448147 | 0.11555  | 3.878375 | 0.000105 | 0.00042  | 949.7353 | 965.6344 | 862.0112 | 1247.759 | 1191.485 | 1343.658 |
| 18960 | LOC119625 | 60.25264 | 0.448112 | 0.375439 | 1.193567 | 0.232647 | 0.326221 | 59.08741 | 35.03436 | 59.13717 | 51.33892 | 85.56443 | 71.35354 |
| 6569  | TBC1D22B  | 1298.221 | 0.447894 | 0.114485 | 3.912244 | 9.14E-05 | 0.00037  | 1084.173 | 1184.052 | 1029.682 | 1477.668 | 1411.813 | 1601.937 |
| 9536  | RIPOR1    | 762.366  | 0.447847 | 0.150534 | 2.97505  | 0.002929 | 0.008167 | 559.9752 | 770.7558 | 605.2863 | 870.5295 | 847.0878 | 920.5612 |
| 14549 | LOC103245 | 152.4206 | 0.447657 | 0.233573 | 1.916556 | 0.055294 | 0.101038 | 134.4374 | 109.4824 | 143.3207 | 198.6593 | 149.7377 | 178.8863 |
| 7517  | PPP1R12B  | 835.9925 | 0.447591 | 0.125965 | 3.553289 | 0.00038  | 0.001346 | 653.2141 | 761.9972 | 704.7759 | 941.9576 | 1037.469 | 916.5413 |
| 3862  | RAB1A     | 7124.093 | 0.447587 | 0.081609 | 5.484511 | 4.15E-08 | 2.85E-07 | 5907.657 | 6238.305 | 5939.459 | 8095.925 | 8158.568 | 8404.643 |
| 21757 | LOC103245 | 19.29709 | 0.447562 | 0.583153 | 0.767486 | 0.442793 | 0.541051 | 12.46799 | 22.44388 | 13.91463 | 22.32127 | 23.53022 | 21.10457 |
| 6877  | STEAP2    | 2555.064 | 0.447224 | 0.118096 | 3.786949 | 0.000153 | 0.00059  | 2007.346 | 2502.219 | 1977.964 | 2899.533 | 2894.217 | 3049.108 |
| 5373  | HECTD2    | 1923.622 | 0.44713  | 0.099842 | 4.478396 | 7.52E-06 | 3.72E-05 | 1567.714 | 1730.369 | 1587.659 | 2209.806 | 2149.806 | 2296.378 |
| 7606  | MAP1S     | 1123.081 | 0.447098 | 0.126891 | 3.523485 | 0.000426 | 0.001489 | 978.4659 | 867.1003 | 1009.506 | 1337.044 | 1144.424 | 1401.946 |
| 25569 | PAGE4     | 0.916871 | 0.447097 | 2.876715 | 0.155419 | 0.876491 | 0.911319 | 0        | 1.094824 | 1.391463 | 0        | 0        | 3.014938 |
| 25089 | LOC103245 | 1.54144  | 0.44692  | 1.923986 | 0.232288 | 0.816314 | 0.864998 | 0.542086 | 0.547412 | 2.782925 | 2.232127 | 2.139111 | 1.004979 |
| 19200 | LOC103227 | 50.7441  | 0.446888 | 0.387556 | 1.153092 | 0.248873 | 0.344598 | 52.58238 | 39.96106 | 35.4823  | 78.12444 | 47.06043 | 51.25395 |
| 6227  | LOC103226 | 3061.865 | 0.446832 | 0.109937 | 4.06442  | 4.82E-05 | 0.000206 | 2680.617 | 2289.824 | 2801.71  | 3553.546 | 3704.94  | 3340.552 |
| 11599 | CHST12    | 339.2873 | 0.446731 | 0.179057 | 2.494912 | 0.012599 | 0.028877 | 300.8579 | 267.6844 | 293.5986 | 453.121  |          |          |



|       |           |          |          |          |          |          |          |          |          |          |          |          |          |
|-------|-----------|----------|----------|----------|----------|----------|----------|----------|----------|----------|----------|----------|----------|
| 5937  | PPM1D     | 3320.84  | 0.446247 | 0.106473 | 4.191196 | 2.77E-05 | 0.000124 | 2658.392 | 3157.471 | 2618.733 | 3845.955 | 3722.053 | 3922.435 |
| 7646  | LOC103225 | 1353.67  | 0.446174 | 0.127098 | 3.510478 | 0.000447 | 0.001555 | 1054.358 | 1315.978 | 1065.165 | 1537.935 | 1664.228 | 1484.355 |
| 15144 | FAM43B    | 122.8333 | 0.446078 | 0.246865 | 1.806971 | 0.070767 | 0.12423  | 113.8381 | 106.1979 | 91.83654 | 158.481  | 121.9293 | 144.717  |
| 20758 | LOC119615 | 25.45786 | 0.445902 | 0.489853 | 0.910278 | 0.362676 | 0.464483 | 20.59928 | 20.25424 | 23.65487 | 29.01765 | 32.08666 | 27.13445 |
| 12866 | IRX3      | 241.7788 | 0.445714 | 0.200279 | 2.225464 | 0.02605  | 0.053827 | 178.8885 | 245.2405 | 190.6304 | 256.6946 | 288.7799 | 290.4391 |
| 7482  | DENND6B   | 1533.294 | 0.445543 | 0.124818 | 3.569551 | 0.000358 | 0.001271 | 1351.421 | 1167.082 | 1381.027 | 1810.255 | 1559.412 | 1930.566 |
| 7351  | RANB5B    | 5104.488 | 0.445499 | 0.123203 | 3.615964 | 0.000299 | 0.001082 | 3984.335 | 5120.49  | 3864.788 | 5805.762 | 5606.609 | 6244.942 |
| 7368  | CNNM2     | 804.9877 | 0.44541  | 0.12339  | 3.609785 | 0.000306 | 0.001106 | 675.9817 | 727.5103 | 644.2472 | 892.8508 | 898.4265 | 990.9098 |
| 25385 | TRNAT-AG  | 0.911901 | 0.445329 | 2.426125 | 0.183556 | 0.854362 | 0.89475  | 1.084173 | 0.547412 | 0.695731 | 0        | 2.139111 | 1.004979 |
| 10619 | KMT5C     | 370.4011 | 0.445271 | 0.163984 | 2.715333 | 0.006621 | 0.016576 | 333.3831 | 274.2533 | 335.3425 | 395.0865 | 432.1004 | 452.2408 |
| 5516  | CORO1B    | 3879.659 | 0.445145 | 0.101055 | 4.404998 | 1.06E-05 | 5.10E-05 | 3453.09  | 3081.929 | 3326.987 | 4533.45  | 4102.814 | 4779.682 |
| 10660 | KBTBD7    | 302.9046 | 0.445079 | 0.164769 | 2.701222 | 0.006909 | 0.017229 | 266.7065 | 249.0724 | 253.2462 | 381.6937 | 323.0057 | 343.703  |
| 7644  | ST6GALNA  | 2104.937 | 0.445017 | 0.126743 | 3.511186 | 0.000446 | 0.001552 | 2070.77  | 1557.387 | 1815.163 | 2381.679 | 2359.439 | 2661.186 |
| 8684  | ZNF691    | 521.8496 | 0.444977 | 0.138716 | 3.207836 | 0.001337 | 0.004094 | 407.1069 | 476.2483 | 443.1809 | 613.8349 | 579.699  | 611.0275 |
| 6794  | NPHP3     | 1397.731 | 0.444818 | 0.116458 | 3.819549 | 0.000134 | 0.000523 | 1185.543 | 1295.176 | 1069.339 | 1700.881 | 1546.577 | 1588.873 |
| 8562  | SRRT      | 4049.068 | 0.444561 | 0.137281 | 3.23833  | 0.001202 | 0.003733 | 2926.724 | 4195.364 | 3170.448 | 4580.325 | 4408.707 | 5012.838 |
| 20682 | LOC119621 | 31.91201 | 0.444525 | 0.480975 | 0.924216 | 0.355374 | 0.456782 | 35.23561 | 16.96977 | 29.22072 | 33.4819  | 36.36488 | 40.19918 |
| 22198 | CUNH4orf1 | 16.88945 | 0.444429 | 0.641898 | 0.692151 | 0.488842 | 0.585452 | 8.131296 | 16.42235 | 18.08902 | 20.08914 | 23.53022 | 15.07469 |
| 8820  | HIC2      | 652.187  | 0.444289 | 0.140266 | 3.167484 | 0.001538 | 0.004635 | 578.4062 | 495.9551 | 587.1973 | 714.2806 | 710.1847 | 827.0981 |
| 10523 | MPV17     | 1141.987 | 0.444142 | 0.162137 | 2.739297 | 0.006157 | 0.015555 | 842.4022 | 1225.655 | 832.0947 | 1330.348 | 1405.396 | 1216.025 |
| 8376  | PPP2R2A   | 1422.589 | 0.444121 | 0.134958 | 3.290804 | 0.000999 | 0.003171 | 1037.553 | 1396.995 | 1182.048 | 1508.918 | 1749.793 | 1660.226 |
| 22861 | LOC119615 | 14.44121 | 0.443795 | 0.759538 | 0.584296 | 0.559021 | 0.650085 | 10.84173 | 4.379295 | 21.56767 | 13.39276 | 21.39111 | 15.07469 |
| 10073 | CUNH8orf3 | 663.3893 | 0.443619 | 0.155914 | 2.845283 | 0.004437 | 0.011711 | 615.8101 | 459.2785 | 609.4607 | 810.2621 | 785.0536 | 700.4707 |
| 21628 | LOC103241 | 21.80369 | 0.443195 | 0.563821 | 0.786056 | 0.431835 | 0.530808 | 13.01007 | 22.9913  | 20.17621 | 20.08914 | 21.39111 | 33.16432 |
| 20207 | LOC119621 | 46.23536 | 0.443072 | 0.444951 | 0.995778 | 0.319358 | 0.420158 | 59.6295  | 26.27577 | 31.30791 | 44.64254 | 66.31243 | 49.24399 |
| 22835 | LOC103231 | 11.41568 | 0.442946 | 0.753655 | 0.587731 | 0.556713 | 0.648134 | 8.131296 | 11.49565 | 9.740239 | 15.62489 | 6.417332 | 17.08465 |
| 8898  | MIF       | 6837.187 | 0.442664 | 0.140743 | 3.145198 | 0.00166  | 0.004959 | 5755.331 | 4662.306 | 6970.533 | 8707.527 | 7514.696 | 7412.729 |
| 25396 | GPR32     | 0.912789 | 0.442607 | 2.425672 | 0.182468 | 0.855216 | 0.895256 | 0.542086 | 1.094824 | 0.695731 | 0        | 2.139111 | 1.004979 |
| 4113  | SCP2      | 4657.766 | 0.44258  | 0.083747 | 5.284757 | 1.26E-07 | 8.14E-07 | 3953.978 | 4042.089 | 3851.569 | 5225.409 | 5437.619 | 5435.934 |
| 22678 | LOC119621 | 12.30319 | 0.442558 | 0.724924 | 0.610488 | 0.541538 | 0.634821 | 11.9259  | 11.49565 | 8.348776 | 13.39276 | 8.556443 | 20.09959 |
| 25388 | LOC119624 | 0.928291 | 0.442531 | 2.415083 | 0.183237 | 0.854612 | 0.894884 | 0.542086 | 1.094824 | 0.695731 | 2.232127 | 0        | 1.004979 |
| 25389 | LOC103216 | 0.928291 | 0.442531 | 2.415083 | 0.183237 | 0.854612 | 0.894884 | 0.542086 | 1.094824 | 0.695731 | 2.232127 | 0        | 1.004979 |
| 7660  | LOC103234 | 761.1852 | 0.442403 | 0.126175 | 3.506274 | 0.000454 | 0.001577 | 654.2982 | 593.3944 | 690.8613 | 832.5834 | 883.4527 | 912.5214 |
| 18406 | TRNAH-GU  | 91.39963 | 0.442379 | 0.350003 | 1.263931 | 0.206255 | 0.297908 | 99.74389 | 43.79295 | 89.05362 | 118.3027 | 91.98176 | 105.5228 |
| 21180 | LOC119621 | 26.40369 | 0.442295 | 0.518271 | 0.853405 | 0.393435 | 0.493837 | 29.81475 | 18.612   | 19.48048 | 26.78552 | 23.53022 | 40.19918 |
| 4338  | LDHA      | 25279.08 | 0.442294 | 0.08627  | 5.126866 | 2.95E-07 | 1.81E-06 | 20641.02 | 23145.67 | 20515.03 | 29042.2  | 29271.59 | 29058.98 |
| 4353  | H2AFY     | 11303.06 | 0.442134 | 0.08649  | 5.111962 | 3.19E-07 | 1.95E-06 | 9223.6   | 10180.76 | 9349.238 | 13412.85 | 12530.91 | 13121.01 |
| 5902  | MAGED1    | 4874.992 | 0.442098 | 0.105008 | 4.210121 | 2.55E-05 | 0.000115 | 4054.264 | 4325.101 | 4029.676 | 5285.677 | 5242.96  | 6312.276 |
| 21874 | FRMD1     | 22.49877 | 0.442051 | 0.590269 | 0.748896 | 0.45392  | 0.551689 | 15.17842 | 21.34906 | 21.56767 | 29.01765 | 10.69555 | 37.18424 |
| 10442 | LOC103233 | 322.5663 | 0.441992 | 0.160334 | 2.7567   | 0.005839 | 0.014865 | 295.4371 | 260.0206 | 264.3779 | 381.6937 | 370.0661 | 363.8026 |
| 24003 | TBX6      | 6.084451 | 0.441424 | 1.086585 | 0.406249 | 0.68456  | 0.758181 | 6.505036 | 4.379295 | 4.174388 | 4.464254 | 14.97377 | 2.009959 |
| 7175  | MYO9A     | 6728.397 | 0.441348 | 0.120155 | 3.673154 | 0.00024  | 0.000888 | 5233.844 | 6749.04  | 5140.063 | 7412.894 | 7741.442 | 8093.1   |
| 21231 | SLC27A3   | 24.37751 | 0.440638 | 0.520571 | 0.846452 | 0.397301 | 0.497492 | 17.34676 | 20.80165 | 23.65487 | 37.94616 | 21.39111 | 25.12449 |
| 20326 | ANKRD34A  | 36.51552 | 0.440538 | 0.452169 | 0.974277 | 0.329919 | 0.431511 | 22.76763 | 36.67659 | 32.69937 | 40.17829 | 55.61688 | 31.15436 |
| 23014 | LOC119615 | 9.505939 | 0.440504 | 0.786372 | 0.560173 | 0.575362 | 0.664654 | 8.131296 | 8.211177 | 7.653045 | 11.16063 | 12.83466 | 9.044815 |
| 8929  | PLPP6     | 701.2379 | 0.440463 | 0.140377 | 3.137709 | 0.001703 | 0.005069 | 526.3659 | 681.5277 | 576.7613 | 805.7978 | 815.0012 | 801.9736 |
| 4345  | RANBP6    | 3315.49  | 0.4404   | 0.085974 | 5.122447 | 3.02E-07 | 1.85E-06 | 2866.553 | 2744.175 | 2830.931 | 3792.384 | 3777.669 | 3881.231 |
| 15614 | LOC119624 | 258.4532 | 0.440143 | 0.254803 | 1.727389 | 0.084098 | 0.143097 | 254.7806 | 148.896  | 257.4206 | 265.6231 | 248.1368 | 375.8623 |
| 20829 | LOC119624 | 30.57583 | 0.440078 | 0.488671 | 0.90056  | 0.367822 | 0.469457 | 24.39389 | 27.37059 | 25.74206 | 22.32127 | 53.47777 | 30.14938 |
| 23718 | LOC119621 | 7.358474 | 0.439846 | 0.97378  | 0.451689 | 0.651493 | 0.730245 | 8.673382 | 2.737059 | 6.957314 | 8.928508 | 12.83466 | 4.019918 |
| 7760  | HNF1B     | 8485.496 | 0.439838 | 0.126545 | 3.475742 | 0.000509 | 0.001745 | 6372.767 | 8691.805 | 6542.658 | 9705.288 | 9343.635 | 10256.82 |
| 25395 | TRNAT-UG  | 1.231493 | 0.439798 | 2.409659 | 0.182515 | 0.855179 | 0.895252 | 1.626259 | 0        | 1.391463 | 2.232127 | 2.139111 | 0        |
| 17162 | LOC119621 | 233.5294 | 0.439757 | 0.298602 | 1.472721 | 0.140826 | 0.218149 | 271.5853 | 114.4091 | 210.8066 | 247.7661 | 213.9111 | 342.698  |
| 11515 | ZBTB7A    | 1240.638 | 0.439722 | 0.175133 | 2.510794 | 0.012046 | 0.027811 | 865.7119 | 1401.374 | 891.9276 | 1381.687 | 1443.9   | 1459.23  |
| 6780  | SLC4A2    | 7534.39  | 0.43932  | 0.114855 | 3.825013 | 0.000131 | 0.000513 | 6790.174 | 5683.777 | 6719.374 | 8830.294 | 7666.573 | 9516.151 |
| 14652 | SDSL      | 228.5739 | 0.439215 | 0.23156  | 1.896762 | 0.057859 | 0.104982 | 210.8716 | 141.7797 | 230.9828 | 276.7837 | 224.6066 | 286.4191 |
| 21782 | LOC103215 | 20.36371 | 0.43917  | 0.576049 | 0.762384 | 0.445831 | 0.544138 | 15.17842 | 15.87494 | 20.17621 | 33.4819  | 21.39111 | 16.07967 |
| 6383  | CDK5      | 1284.035 | 0.439104 | 0.110161 | 3.986035 | 6.72E-05 | 0.00028  | 1119.408 | 1030.776 | 1124.302 | 1448.65  | 1403.257 | 1577.818 |
| 12832 | MYOZ1     | 191.4366 | 0.43901  | 0.196575 | 2.233299 | 0.025529 | 0.052891 | 162.6259 | 174.6244 | 149.5822 | 220.9806 | 226.7457 | 214.0606 |
| 6137  | ACAA2     | 3327.773 | 0.438554 | 0.106919 | 4.101758 | 4.10E-05 | 0.000178 | 2655.681 | 3184.295 | 2638.213 | 3785.687 | 3788.365 | 3914.395 |
| 7456  | CAMTA2    | 1198.396 | 0.438538 | 0.122517 | 3.579403 | 0.000344 | 0.001228 | 931.8465 | 1151.754 | 969.8495 | 1339.276 | 1394.7   | 1402.951 |
| 12461 | RELL2     | 231.6089 | 0.438121 | 0.189805 | 2.308269 | 0.020984 | 0.044769 | 219.0029 | 177.3614 | 194.8048 | 270.0874 | 245.9977 | 282.3992 |
| 24688 | LOC119621 | 3.096926 | 0.438077 | 1.454331 | 0.301222 | 0.763245 | 0.821892 | 2.168345 | 3.831883 | 2.087194 | 4.464254 | 0        | 6.029877 |
| 9131  | SMARCC2   | 5240.874 | 0.437976 | 0.142543 | 3.072589 | 0.002122 | 0.006179 | 3706.245 | 5575.389 | 4073.507 | 6062.457 | 5743.512 | 6284.137 |
| 5010  | OCIAD2    | 3163.299 | 0.437956 | 0.093546 | 4.681718 | 2.84E-06 | 1.51E-05 | 2768.435 | 2631.956 | 2655.607 | 3874.972 | 3593.706 | 3455.119 |
| 25314 | LOC119624 | 1.52505  | 0.437783 | 2.217547 | 0.197418 | 0.843501 | 0.885852 | 1.084173 | 0        | 2.782925 | 0        | 4.278221 | 1.004979 |
| 23605 | CPED1     | 6.736567 | 0.43769  | 0.935977 | 0.467629 | 0.64005  | 0.720841 | 6.505036 | 4.926706 | 5.565851 | 6.696381 | 10.69555 | 6.029877 |
| 19795 | LOC119615 | 41.78323 | 0.437608 | 0.415229 | 1.053895 | 0.291931 | 0.392028 | 28.73058 | 37.224   | 39.65669 | 46.87467 | 62.03421 | 36.17926 |
| 5166  | USP38     | 2905.389 | 0.437193 | 0.09514  | 4.595268 | 4.32E-06 | 2.22E-05 | 2451.857 | 2601.848 | 2353.659 | 3176.317 | 3407.603 | 3441.05  |
| 7366  | ERVH48-1  | 13277.29 | 0.437039 | 0.       |          |          |          |          |          |          |          |          |          |



|       |           |          |          |          |          |          |          |          |          |          |          |          |          |
|-------|-----------|----------|----------|----------|----------|----------|----------|----------|----------|----------|----------|----------|----------|
| 7503  | MAPK6     | 3891.311 | 0.436693 | 0.122682 | 3.559569 | 0.000371 | 0.001316 | 2984.728 | 3913.994 | 3022.257 | 4274.523 | 4577.697 | 4574.667 |
| 7723  | LOC119618 | 5673.95  | 0.436143 | 0.125143 | 3.485158 | 0.000492 | 0.001693 | 5431.163 | 3961.072 | 5078.839 | 6508.882 | 6175.612 | 6888.129 |
| 5046  | FZD6      | 2812.213 | 0.43606  | 0.093532 | 4.662153 | 3.13E-06 | 1.65E-05 | 2358.618 | 2289.276 | 2523.418 | 3160.692 | 3343.43  | 3197.845 |
| 13645 | SLX1A     | 336.529  | 0.435974 | 0.209543 | 2.080588 | 0.037472 | 0.073007 | 331.7569 | 216.2277 | 313.0791 | 328.1227 | 380.7617 | 449.2258 |
| 6413  | ANK2      | 11364.73 | 0.435961 | 0.109691 | 3.974441 | 7.05E-05 | 0.000292 | 9068.021 | 10994.22 | 8922.755 | 12906.16 | 12282.77 | 14014.44 |
| 19809 | ZNF165    | 37.84638 | 0.435752 | 0.414366 | 1.05161  | 0.292978 | 0.393197 | 36.31979 | 32.2973  | 28.52499 | 40.17829 | 38.50399 | 51.25395 |
| 9088  | MAP3K11   | 1464.588 | 0.435744 | 0.141184 | 3.086348 | 0.002026 | 0.005928 | 1770.394 | 1043.914 | 1325.368 | 1667.399 | 1493.099 | 1887.351 |
| 4300  | DSTN      | 11146.53 | 0.435689 | 0.084523 | 5.154646 | 2.54E-07 | 1.57E-06 | 9029.533 | 9939.356 | 9456.381 | 13196.33 | 12823.97 | 12433.61 |
| 12638 | LOC103217 | 196.6831 | 0.435475 | 0.191601 | 2.272827 | 0.023037 | 0.048459 | 166.9626 | 158.202  | 176.7158 | 223.2127 | 228.8848 | 226.1204 |
| 7091  | UBQLN2    | 1113.662 | 0.435283 | 0.117617 | 3.700849 | 0.000215 | 0.000806 | 934.5569 | 1007.238 | 901.6679 | 1305.794 | 1167.954 | 1364.762 |
| 20054 | LOC119620 | 50.99363 | 0.435233 | 0.426776 | 1.019816 | 0.307816 | 0.408077 | 66.67662 | 28.46541 | 34.78657 | 53.57105 | 64.17332 | 58.28881 |
| 5965  | CCNL1     | 3430.352 | 0.435227 | 0.104114 | 4.18029  | 2.91E-05 | 0.00013  | 2705.553 | 3173.894 | 2875.458 | 3825.866 | 3773.391 | 4227.949 |
| 25035 | TRNAG-GC  | 1.823802 | 0.43407  | 1.810609 | 0.239737 | 0.810534 | 0.860717 | 2.168345 | 1.094824 | 1.391463 | 0        | 4.278221 | 2.009959 |
| 23548 | FAM221B   | 7.408992 | 0.433819 | 0.910039 | 0.476704 | 0.633573 | 0.715285 | 4.336691 | 6.02153  | 8.348776 | 11.16063 | 8.556443 | 6.029877 |
| 8062  | RAB24     | 1674.517 | 0.433692 | 0.127722 | 3.395587 | 0.000685 | 0.002258 | 1499.953 | 1278.207 | 1502.084 | 1854.898 | 1724.123 | 2187.84  |
| 24628 | LOC119623 | 3.67377  | 0.433341 | 1.392375 | 0.311224 | 0.75563  | 0.815674 | 0.542086 | 3.831883 | 4.87012  | 2.232127 | 8.556443 | 2.009959 |
| 8860  | CHEK2     | 675.35   | 0.43308  | 0.137292 | 3.154439 | 0.001608 | 0.004825 | 630.4464 | 507.9982 | 587.1973 | 783.4766 | 737.9932 | 804.9886 |
| 7290  | HCF2      | 1125.256 | 0.433046 | 0.119059 | 3.637245 | 0.000276 | 0.001005 | 877.6378 | 1053.22  | 939.9331 | 1305.794 | 1334.805 | 1240.145 |
| 9374  | SPRY4     | 467.5305 | 0.432839 | 0.143638 | 3.013413 | 0.002583 | 0.007325 | 383.2551 | 435.1924 | 375.6949 | 517.8535 | 545.4732 | 547.7138 |
| 5824  | BRK1      | 3750.178 | 0.432597 | 0.101523 | 4.261083 | 2.03E-05 | 9.29E-05 | 3201.562 | 3043.062 | 3325.596 | 4506.664 | 4534.915 | 3889.271 |
| 9400  | LOC119615 | 2025.308 | 0.432515 | 0.143821 | 3.007316 | 0.002636 | 0.007454 | 1879.413 | 1364.15  | 1932.046 | 2258.913 | 2179.754 | 2537.573 |
| 13755 | LOC103234 | 192.2039 | 0.432511 | 0.210266 | 2.056968 | 0.039689 | 0.07671  | 140.9425 | 191.5941 | 157.931  | 223.2127 | 222.4675 | 217.0756 |
| 11354 | SPIRE2    | 564.5605 | 0.432122 | 0.169668 | 2.546866 | 0.01087  | 0.025451 | 544.7968 | 411.6537 | 489.7949 | 611.6028 | 564.7252 | 764.7894 |
| 7900  | JMJD1C    | 6413.502 | 0.432121 | 0.125667 | 3.438631 | 0.000585 | 0.001967 | 4957.922 | 6578.795 | 4844.378 | 7205.306 | 7270.837 | 7623.774 |
| 19510 | LHX6      | 57.5508  | 0.431989 | 0.392804 | 1.099757 | 0.271438 | 0.369857 | 40.11439 | 62.95236 | 42.43961 | 64.73168 | 89.84265 | 45.22408 |
| 12372 | LOC119624 | 4119.426 | 0.431978 | 0.185577 | 2.327757 | 0.019925 | 0.042815 | 3654.204 | 2355.513 | 4514.601 | 4928.536 | 4141.318 | 5122.38  |
| 6223  | DPYD      | 5605.32  | 0.43188  | 0.106236 | 4.06531  | 4.80E-05 | 0.000205 | 5149.278 | 4403.381 | 4771.326 | 6087.01  | 6115.717 | 7105.205 |
| 16647 | DNAH3     | 107.1312 | 0.431796 | 0.278748 | 1.549053 | 0.121369 | 0.193825 | 95.4072  | 88.1333  | 87.66215 | 151.7846 | 128.3466 | 91.45313 |
| 7441  | MED25     | 1318.379 | 0.431675 | 0.120412 | 3.584985 | 0.000337 | 0.001204 | 1115.072 | 1086.612 | 1170.916 | 1551.328 | 1324.11  | 1662.236 |
| 24609 | CHAD      | 3.651154 | 0.431406 | 1.369432 | 0.315025 | 0.752742 | 0.813206 | 2.168345 | 4.379295 | 2.782925 | 0        | 8.556443 | 4.019918 |
| 10419 | KRBA1     | 1083.629 | 0.431054 | 0.156084 | 2.761668 | 0.005751 | 0.014673 | 1005.028 | 730.7948 | 1036.64  | 1225.438 | 1123.033 | 1380.842 |
| 20102 | TRIM46    | 44.35772 | 0.431013 | 0.425878 | 1.012058 | 0.311511 | 0.41194  | 42.28274 | 25.72836 | 44.52681 | 49.10679 | 66.31243 | 38.18922 |
| 7685  | S100A6    | 46603.47 | 0.431007 | 0.123243 | 3.497217 | 0.00047  | 0.001626 | 42398.74 | 32080.52 | 44599.86 | 54613.5  | 54686.36 | 51241.89 |
| 12118 | CNBD2     | 248.8911 | 0.430813 | 0.18084  | 2.382285 | 0.017206 | 0.037746 | 219.0029 | 191.0467 | 226.8084 | 294.6408 | 267.3888 | 294.459  |
| 6152  | VPS11     | 2268.619 | 0.430731 | 0.10518  | 4.09517  | 4.22E-05 | 0.000182 | 1954.221 | 2027.613 | 1820.033 | 2553.553 | 2434.308 | 2821.982 |
| 6343  | DUSP16    | 1604.216 | 0.430534 | 0.107398 | 4.008779 | 6.10E-05 | 0.000256 | 1329.738 | 1470.348 | 1302.409 | 1828.112 | 1754.071 | 1940.615 |
| 6820  | BCR       | 1019.428 | 0.430387 | 0.112968 | 3.809824 | 0.000139 | 0.000542 | 883.0587 | 869.29   | 857.141  | 1120.528 | 1127.311 | 1259.239 |
| 22401 | LOC103225 | 17.89336 | 0.430238 | 0.6553   | 0.656551 | 0.51147  | 0.607001 | 24.39389 | 9.853413 | 11.82743 | 22.32127 | 12.83466 | 26.12947 |
| 20270 | LOC119623 | 33.83507 | 0.430047 | 0.436868 | 0.984387 | 0.324925 | 0.426174 | 28.73058 | 33.93953 | 23.65487 | 35.71403 | 42.78221 | 38.18922 |
| 14857 | OXL1      | 180.5017 | 0.429997 | 0.231053 | 1.861031 | 0.06274  | 0.112266 | 174.5518 | 118.241  | 169.7585 | 189.7308 | 209.6328 | 221.0955 |
| 22729 | LOC119625 | 12.88338 | 0.429923 | 0.711788 | 0.604005 | 0.54584  | 0.638396 | 9.215468 | 14.78012 | 9.044508 | 8.928508 | 19.252   | 16.07967 |
| 15227 | LOC119623 | 122.9184 | 0.429658 | 0.239909 | 1.790922 | 0.073306 | 0.127986 | 117.0907 | 100.1764 | 97.40239 | 133.9276 | 141.1813 | 147.732  |
| 7306  | NAGA      | 1240.138 | 0.429591 | 0.118247 | 3.633013 | 0.00028  | 0.001019 | 1047.311 | 1104.677 | 1024.117 | 1330.348 | 1345.501 | 1588.873 |
| 5664  | ATP9A     | 4614.957 | 0.429591 | 0.09897  | 4.340611 | 1.42E-05 | 6.67E-05 | 4051.011 | 3944.65  | 3809.825 | 5080.321 | 4967.015 | 5836.921 |
| 9687  | BMP2K     | 4247.83  | 0.429579 | 0.146377 | 2.934736 | 0.003338 | 0.009162 | 3161.99  | 4590.595 | 3108.528 | 4787.912 | 4697.487 | 5140.47  |
| 9001  | MCTP1     | 528.4001 | 0.429469 | 0.13783  | 3.115928 | 0.001834 | 0.005416 | 449.9317 | 475.1535 | 426.4833 | 558.0317 | 641.7332 | 619.0674 |
| 8805  | ZER1      | 751.0966 | 0.429201 | 0.135272 | 3.172871 | 0.001509 | 0.004558 | 636.9515 | 648.1356 | 639.3771 | 888.3865 | 737.9932 | 955.7355 |
| 11063 | ZNF70     | 370.1271 | 0.429159 | 0.164252 | 2.612804 | 0.00898  | 0.021581 | 293.2687 | 355.8177 | 299.1645 | 419.6399 | 393.5964 | 459.2756 |
| 24432 | LOC103247 | 3.975222 | 0.429086 | 1.262865 | 0.339772 | 0.734028 | 0.798631 | 1.626259 | 4.926706 | 3.478657 | 2.232127 | 8.556443 | 3.014938 |
| 8902  | LOC103233 | 2051.506 | 0.428423 | 0.136245 | 3.1445   | 0.001664 | 0.004969 | 1482.838 | 1455.021 | 1854.124 | 2281.234 | 2149.806 | 2626.011 |
| 17106 | AGMAT     | 100.2241 | 0.428362 | 0.289351 | 1.480423 | 0.138761 | 0.215617 | 97.03346 | 74.44801 | 86.27069 | 82.5887  | 128.3466 | 132.6573 |
| 20899 | LOC119627 | 29.57815 | 0.428333 | 0.480953 | 0.890592 | 0.373148 | 0.47467  | 17.88885 | 29.01283 | 28.52499 | 31.24978 | 40.6431  | 30.14938 |
| 6257  | SLC25A12  | 2162.368 | 0.428084 | 0.105785 | 4.046754 | 5.19E-05 | 0.000221 | 1987.831 | 1717.231 | 1829.774 | 2484.357 | 2338.048 | 2616.967 |
| 18540 | OTUD7A    | 67.66663 | 0.42795  | 0.343808 | 1.244735 | 0.213229 | 0.305755 | 47.7036  | 68.42648 | 56.35424 | 62.49956 | 102.6773 | 68.3386  |
| 13731 | KISS1R    | 166.8983 | 0.427897 | 0.207266 | 2.064485 | 0.038972 | 0.075454 | 138.232  | 146.159  | 144.0164 | 185.2665 | 179.6853 | 208.0308 |
| 10514 | WASL      | 1493.45  | 0.427521 | 0.155965 | 2.741132 | 0.006123 | 0.015482 | 1082.546 | 1615.96  | 1123.606 | 1642.845 | 1704.871 | 1790.873 |
| 3908  | ENSA      | 9370.984 | 0.427487 | 0.078598 | 5.438932 | 5.36E-08 | 3.65E-07 | 7913.919 | 8180.522 | 7883.332 | 10917.33 | 10571.48 | 10759.31 |
| 21247 | LOC103225 | 34.4699  | 0.426783 | 0.506873 | 0.841993 | 0.399792 | 0.500211 | 29.81475 | 24.63353 | 32.69937 | 31.24978 | 66.31243 | 22.10955 |
| 8049  | TT30A     | 698.3291 | 0.426782 | 0.125529 | 3.399864 | 0.000674 | 0.002227 | 621.231  | 589.5625 | 578.1528 | 825.887  | 737.9932 | 837.1479 |
| 21504 | LOC103227 | 25.63428 | 0.426727 | 0.531457 | 0.802939 | 0.42201  | 0.521724 | 15.17842 | 31.20247 | 19.48048 | 31.24978 | 23.53022 | 33.16432 |
| 21928 | IL33      | 19.72145 | 0.426464 | 0.575922 | 0.74049  | 0.459003 | 0.556485 | 15.17842 | 22.44388 | 12.52316 | 24.5534  | 23.53022 | 20.09959 |
| 14989 | LOC103247 | 159.6521 | 0.426316 | 0.232219 | 1.835839 | 0.066382 | 0.117737 | 127.9324 | 115.5039 | 166.2798 | 178.5702 | 179.6853 | 189.9411 |
| 18389 | CCDC78    | 56.80745 | 0.426306 | 0.336606 | 1.266484 | 0.20534  | 0.29686  | 53.12446 | 45.43518 | 47.30973 | 64.73168 | 59.8951  | 70.34856 |
| 15115 | KCNJ11    | 158.8986 | 0.426038 | 0.2353   | 1.810616 | 0.0702   | 0.123472 | 155.0367 | 109.4824 | 141.9292 | 205.3557 | 164.7115 | 176.8764 |
| 6179  | AMBRA1    | 2402.704 | 0.425957 | 0.104245 | 4.086114 | 4.39E-05 | 0.000189 | 2096.248 | 2091.113 | 1969.616 | 2716.499 | 2534.846 | 3007.904 |
| 21048 | LOC119623 | 27.43132 | 0.425921 | 0.48786  | 0.873039 | 0.382642 | 0.483302 | 27.6464  | 19.70683 | 22.2634  | 33.4819  | 36.36488 | 25.12449 |
| 6795  | GLG1      | 8596.515 | 0.425857 | 0.111499 | 3.81938  | 0.000134 | 0.000523 | 6965.81  | 8091.294 | 6960.097 | 9314.666 | 9153.255 | 11093.97 |
| 20083 | LOC119620 | 4592.376 | 0.425753 | 0.419333 | 1.015309 | 0.309959 | 0.410317 | 5240.349 | 1938.385 | 4580     | 5406.212 | 5456.871 | 4932.439 |
| 18524 | LOC119627 | 60.39299 | 0.425646 | 0.341347 | 1.246958 | 0.212413 | 0.304848 | 58.00324 | 43.24553 | 52.87558 | 62.49956 | 83.42532 | 62.30873 |
| 21459 | HUS1B     | 29.91199 | 0.425598 | 0.525446 | 0.809975 | 0.417954 | 0.517793 | 29.27266 | 15.32753 |          |          |          |          |



|       |           |          |          |          |          |          |          |          |          |          |          |          |          |
|-------|-----------|----------|----------|----------|----------|----------|----------|----------|----------|----------|----------|----------|----------|
| 24326 | PTCHD1    | 5.261741 | 0.424729 | 1.186568 | 0.357947 | 0.720383 | 0.78728  | 4.878777 | 6.02153  | 2.087194 | 11.16063 | 6.417332 | 1.004979 |
| 7582  | DICER1    | 6620.639 | 0.424633 | 0.120226 | 3.531949 | 0.000413 | 0.001446 | 5285.342 | 6571.679 | 5106.668 | 7196.377 | 7251.585 | 8312.185 |
| 22476 | CTSS      | 17.96641 | 0.424626 | 0.660804 | 0.64259  | 0.52049  | 0.615645 | 14.09425 | 16.96977 | 13.91463 | 31.24978 | 23.53022 | 8.039836 |
| 24418 | LOC119624 | 4.275724 | 0.424547 | 1.237289 | 0.343127 | 0.731503 | 0.796421 | 2.710432 | 3.831883 | 4.174388 | 2.232127 | 10.69555 | 2.009959 |
| 16771 | GLIPR1L1  | 99.23104 | 0.424541 | 0.277449 | 1.530159 | 0.125977 | 0.199697 | 76.43418 | 90.32295 | 89.05362 | 116.0706 | 89.84265 | 133.6623 |
| 19008 | LOC10323C | 96.35412 | 0.424244 | 0.358431 | 1.183615 | 0.236565 | 0.330866 | 118.1748 | 65.68942 | 61.22436 | 104.91   | 149.7377 | 78.3884  |
| 10540 | NDUFC2    | 2375.248 | 0.42411  | 0.154969 | 2.736732 | 0.006205 | 0.015652 | 2319.045 | 1494.434 | 2272.954 | 2770.07  | 2667.471 | 2727.514 |
| 8891  | PAQR4     | 1705.806 | 0.424099 | 0.134775 | 3.146713 | 0.001651 | 0.004937 | 1556.872 | 1261.784 | 1557.743 | 1886.147 | 1741.236 | 2231.054 |
| 10646 | CTXN1     | 420.8287 | 0.423997 | 0.156627 | 2.70705  | 0.006788 | 0.016952 | 311.1576 | 384.2831 | 383.348  | 466.5145 | 496.2737 | 483.3951 |
| 18902 | LOC10322C | 10303.79 | 0.423978 | 0.35203  | 1.204382 | 0.228442 | 0.321296 | 6199.842 | 13417.06 | 6784.077 | 12238.75 | 12436.79 | 10746.25 |
| 17908 | ITPKA     | 83.2869  | 0.423949 | 0.311679 | 1.360207 | 0.173764 | 0.257952 | 88.90216 | 53.64636 | 70.9646  | 87.05295 | 102.6773 | 96.47803 |
| 10390 | GPATCH11  | 1042.869 | 0.423939 | 0.153157 | 2.768001 | 0.00564  | 0.014431 | 789.2778 | 1103.035 | 778.5234 | 1180.795 | 1242.823 | 1162.761 |
| 24420 | PRRX2     | 4.280032 | 0.423926 | 1.237558 | 0.342551 | 0.731936 | 0.796828 | 4.878777 | 4.379295 | 1.391463 | 4.464254 | 8.556443 | 2.009959 |
| 9313  | NRXN1     | 3185.226 | 0.423792 | 0.139855 | 3.030223 | 0.002444 | 0.006976 | 2432.884 | 3367.677 | 2362.008 | 3450.868 | 3741.305 | 3756.613 |
| 21925 | GATA3     | 26.72727 | 0.42379  | 0.572058 | 0.740816 | 0.458805 | 0.55635  | 13.55216 | 24.08612 | 29.91645 | 44.64254 | 32.08666 | 16.07967 |
| 5924  | THSD4     | 1725.759 | 0.423789 | 0.100906 | 4.199859 | 2.67E-05 | 0.00012  | 1467.97  | 1491.15  | 1467.993 | 1904.004 | 1905.948 | 2117.492 |
| 24013 | LOC11962C | 5.184189 | 0.423771 | 1.047602 | 0.404515 | 0.685834 | 0.759261 | 4.878777 | 6.568942 | 3.478657 | 2.232127 | 10.69555 | 7.034856 |
| 6304  | NRBP1     | 4852.733 | 0.423654 | 0.105267 | 4.024557 | 5.71E-05 | 0.000241 | 3949.641 | 4630.009 | 3858.526 | 5578.085 | 5262.212 | 5837.926 |
| 20883 | LOC11962C | 43.32582 | 0.423387 | 0.47449  | 0.892299 | 0.372233 | 0.473869 | 27.6464  | 48.71965 | 34.09084 | 29.01765 | 81.28621 | 39.1942  |
| 6453  | STIM1     | 4519.03  | 0.423351 | 0.106934 | 3.959016 | 7.53E-05 | 0.00031  | 3823.877 | 4089.166 | 3674.853 | 5151.749 | 4646.148 | 5728.383 |
| 23848 | LOC11962C | 7.120345 | 0.423189 | 0.983025 | 0.430497 | 0.666834 | 0.743366 | 2.710432 | 4.926706 | 10.43597 | 8.928508 | 10.69555 | 5.024897 |
| 10982 | HELB      | 530.5149 | 0.422954 | 0.160615 | 2.633333 | 0.008455 | 0.020468 | 416.8644 | 535.3688 | 409.7858 | 580.353  | 575.4208 | 665.2964 |
| 7246  | FAM120B   | 2173.376 | 0.422667 | 0.115673 | 3.653962 | 0.000258 | 0.000947 | 1804.606 | 2068.669 | 1701.759 | 2464.268 | 2316.657 | 2684.3   |
| 9006  | CARHSP1   | 2417.946 | 0.422455 | 0.135638 | 3.114586 | 0.001842 | 0.005438 | 2232.312 | 1659.205 | 2309.828 | 2841.498 | 2592.602 | 2872.231 |
| 5517  | CTNND1    | 8937.383 | 0.422374 | 0.095895 | 4.404567 | 1.06E-05 | 5.11E-05 | 7606.014 | 8218.294 | 7094.373 | 10116    | 9730.814 | 10858.8  |
| 20307 | LOC10323C | 47.10051 | 0.422214 | 0.431815 | 0.977768 | 0.328189 | 0.42965  | 37.94605 | 39.96106 | 41.04815 | 69.19594 | 66.31243 | 28.13943 |
| 13483 | NTN1      | 189.4934 | 0.422049 | 0.199991 | 2.110337 | 0.034829 | 0.068674 | 166.4205 | 148.3486 | 172.5414 | 214.2842 | 203.2155 | 232.1503 |
| 20754 | FAM71D    | 32.31676 | 0.422027 | 0.463541 | 0.910441 | 0.36259  | 0.464437 | 33.60935 | 25.72836 | 22.95914 | 31.24978 | 49.19955 | 31.15436 |
| 9724  | MAP1LC3B  | 1235.046 | 0.42195  | 0.144304 | 2.924036 | 0.003455 | 0.009447 | 945.3986 | 1201.569 | 1024.117 | 1185.259 | 1478.125 | 1575.808 |
| 24839 | HS3ST6    | 2.746236 | 0.421943 | 1.534213 | 0.275023 | 0.783299 | 0.838359 | 4.336691 | 1.094824 | 1.391463 | 2.232127 | 6.417332 | 1.004979 |
| 6355  | NR3C1     | 3264.817 | 0.421917 | 0.105379 | 4.003807 | 6.23E-05 | 0.000261 | 2700.674 | 2953.834 | 2724.484 | 3542.386 | 3520.976 | 4146.545 |
| 5690  | STK40     | 3169.829 | 0.421914 | 0.097416 | 4.331042 | 1.48E-05 | 6.93E-05 | 2809.092 | 2592.542 | 2732.833 | 3526.761 | 3450.386 | 3907.36  |
| 26971 | LOC11962C | 0.657251 | 0.421733 | 3.267781 | 0.129058 | 0.897312 | NA       | 0.542086 | 0        | 1.391463 | 0        | 0        | 2.009959 |
| 20969 | LOC11961C | 30.35925 | 0.421504 | 0.477297 | 0.883107 | 0.377178 | 0.478211 | 23.30971 | 31.74989 | 22.2634  | 46.87467 | 27.80844 | 30.14938 |
| 25366 | LOC11962C | 1.58255  | 0.421355 | 2.243773 | 0.187788 | 0.851043 | 0.891905 | 0        | 0.547412 | 3.478657 | 4.464254 | 0        | 1.004979 |
| 18222 | STAB1     | 62.1557  | 0.421328 | 0.324663 | 1.29774  | 0.194377 | 0.283586 | 55.8349  | 49.26706 | 53.57132 | 80.35657 | 70.59065 | 63.31371 |
| 14729 | FN3K      | 163.6507 | 0.421288 | 0.223672 | 1.883512 | 0.059631 | 0.107625 | 118.7169 | 159.2968 | 141.9292 | 200.8914 | 171.1289 | 189.9411 |
| 11796 | METRN     | 344.0698 | 0.421216 | 0.17195  | 2.449639 | 0.0143   | 0.032228 | 318.7468 | 252.3568 | 309.6005 | 419.6399 | 404.2919 | 359.7826 |
| 8465  | TMEM117   | 624.0766 | 0.421146 | 0.129055 | 3.263321 | 0.001101 | 0.003458 | 506.3087 | 574.235  | 520.4071 | 698.6557 | 727.2976 | 717.5553 |
| 9941  | DIAPH2    | 613.1015 | 0.421097 | 0.146377 | 2.876796 | 0.004017 | 0.010744 | 485.7094 | 608.7219 | 477.2717 | 700.8879 | 716.6021 | 689.4109 |
| 25036 | LOC11961C | 2.128779 | 0.421062 | 1.757742 | 0.239547 | 0.810681 | 0.860839 | 2.168345 | 1.094824 | 2.087194 | 0        | 6.417332 | 1.004979 |
| 9508  | OXSM      | 1210.069 | 0.421019 | 0.141144 | 2.982903 | 0.002855 | 0.007984 | 1136.213 | 834.2556 | 1134.042 | 1361.597 | 1422.509 | 1371.797 |
| 20732 | LOC10322C | 34.05599 | 0.420929 | 0.460789 | 0.913496 | 0.360982 | 0.462893 | 22.76763 | 24.08612 | 40.35242 | 40.17829 | 42.78221 | 34.1693  |
| 8458  | LOC10324C | 1469.012 | 0.420847 | 0.12886  | 3.265936 | 0.001091 | 0.003429 | 1143.26  | 1475.275 | 1149.348 | 1676.327 | 1700.593 | 1669.271 |
| 16703 | LOC11962C | 104.7325 | 0.420838 | 0.272906 | 1.542061 | 0.123059 | 0.195864 | 99.74389 | 95.79707 | 71.66033 | 129.4634 | 126.2075 | 105.5228 |
| 19692 | LOC10324C | 44.39329 | 0.420735 | 0.392755 | 1.071241 | 0.284061 | 0.383502 | 41.74065 | 39.96106 | 31.30791 | 49.10679 | 62.03421 | 42.20914 |
| 4711  | LOC10323C | 10249.33 | 0.420564 | 0.086217 | 4.877989 | 1.07E-06 | 6.05E-06 | 8930.331 | 8796.36  | 8575.585 | 11814.65 | 11005.72 | 12373.31 |
| 22934 | GALNT3    | 12.3525  | 0.420278 | 0.73217  | 0.574016 | 0.565957 | 0.656092 | 8.673382 | 9.306001 | 13.2189  | 15.62489 | 19.252   | 8.039836 |
| 16630 | LOC11962C | 92.74401 | 0.420183 | 0.270616 | 1.552695 | 0.120496 | 0.192627 | 74.80792 | 77.18507 | 86.96642 | 95.98146 | 106.9555 | 114.5677 |
| 10735 | ZNF709    | 370.2427 | 0.420005 | 0.156471 | 2.684239 | 0.00727  | 0.018003 | 332.9572 | 292.8653 | 333.9511 | 433.0326 | 449.2132 | 390.457  |
| 9411  | RCOR3     | 707.5121 | 0.41957  | 0.139627 | 3.004948 | 0.002656 | 0.007504 | 578.9482 | 686.4544 | 549.6278 | 765.6196 | 868.4789 | 795.9437 |
| 4904  | HADHB     | 7672.088 | 0.419438 | 0.088475 | 4.740738 | 2.13E-06 | 1.15E-05 | 6590.686 | 6797.76  | 6310.284 | 8609.314 | 8400.288 | 9324.2   |
| 9833  | CHMP1A    | 2850.871 | 0.419389 | 0.144697 | 2.898398 | 0.003751 | 0.010141 | 2767.351 | 1952.071 | 2603.427 | 3156.228 | 2934.86  | 3691.29  |
| 10367 | CLCN2     | 551.3663 | 0.419337 | 0.151269 | 2.772133 | 0.005569 | 0.014281 | 498.7195 | 431.9079 | 489.0992 | 611.6028 | 558.3079 | 718.5603 |
| 19435 | LOC11962C | 45.73457 | 0.419181 | 0.376968 | 1.11198  | 0.266147 | 0.364059 | 44.45108 | 36.12918 | 36.17803 | 55.80317 | 55.61688 | 46.22906 |
| 11750 | LOC11962C | 399.1888 | 0.418893 | 0.170361 | 2.458858 | 0.013938 | 0.031535 | 383.7971 | 293.4127 | 347.17   | 415.1756 | 513.3866 | 442.191  |
| 6286  | WBP1L     | 2311.918 | 0.41886  | 0.103821 | 4.034434 | 5.47E-05 | 0.000231 | 2005.177 | 2056.079 | 1878.475 | 2671.856 | 2427.891 | 2832.032 |
| 20251 | LOC11962C | 38.71781 | 0.41858  | 0.424077 | 0.987038 | 0.323624 | 0.424846 | 41.74065 | 27.37059 | 29.91645 | 53.57105 | 38.50399 | 41.20416 |
| 6121  | MTCL1     | 2466.984 | 0.418567 | 0.101885 | 4.108247 | 3.99E-05 | 0.000173 | 2136.362 | 2040.204 | 2164.42  | 2754.445 | 2633.245 | 3073.227 |
| 23872 | LOC11961C | 6.762531 | 0.418443 | 0.980318 | 0.426844 | 0.669493 | 0.74557  | 3.794605 | 7.663765 | 5.565851 | 6.696381 | 12.83466 | 4.019918 |
| 7240  | SMAP1     | 3184.566 | 0.418422 | 0.114466 | 3.655414 | 0.000257 | 0.000943 | 2567.321 | 3136.122 | 2474.716 | 3671.849 | 3535.95  | 3721.439 |
| 23615 | LOC10323C | 8.008069 | 0.418298 | 0.896892 | 0.466385 | 0.64094  | 0.721549 | 6.505036 | 10.40082 | 3.478657 | 8.928508 | 10.69555 | 8.039836 |
| 20472 | CATSPER2  | 35.47807 | 0.418187 | 0.439873 | 0.9507   | 0.341757 | 0.443784 | 39.03022 | 26.82318 | 25.04633 | 35.71403 | 47.06043 | 39.1942  |
| 20684 | LOC11962C | 34.14339 | 0.418078 | 0.452518 | 0.923893 | 0.355542 | 0.456954 | 28.18849 | 30.10765 | 28.52499 | 55.80317 | 32.08666 | 30.14938 |
| 19741 | LOC10322C | 44.15245 | 0.417871 | 0.393608 | 1.061643 | 0.288398 | 0.388382 | 47.16151 | 32.84471 | 33.39511 | 44.64254 | 55.61688 | 51.25395 |
| 4673  | ARHGAP1E  | 4789.284 | 0.417854 | 0.08523  | 4.902646 | 9.46E-07 | 5.38E-06 | 4063.479 | 4285.14  | 3951.754 | 5479.872 | 5512.488 | 5442.969 |
| 10479 | DUS2      | 647.8464 | 0.417803 | 0.151965 | 2.749343 | 0.005971 | 0.01515  | 639.6619 | 473.5112 | 553.1064 | 696.4236 | 729.4367 | 794.9388 |
| 6688  | ADPRH     | 2188.269 | 0.417698 | 0.108199 | 3.860471 | 0.000113 | 0.00045  | 1976.447 | 1844.778 | 1805.423 | 2430.786 | 2314.518 | 2757.664 |
| 10389 | LYPLA2    | 2088.378 | 0.417679 | 0.150893 | 2.768047 | 0.005639 | 0.014431 | 2047.46  | 1407.943 | 1913.261 | 2325.876 | 2143.389 | 2692.34  |
| 5852  | NIPAL3    | 2884.157 | 0.417266 | 0.098314 | 4.244205 | 2.19E-05 | 9.97E-05 | 2437.762 | 2504     |          |          |          |          |



|       |           |          |          |          |          |          |           |           |          |          |          |          |          |
|-------|-----------|----------|----------|----------|----------|----------|-----------|-----------|----------|----------|----------|----------|----------|
| 22767 | PRR25     | 14.96304 | 0.416575 | 0.696034 | 0.598498 | 0.549508 | 0.64166   | 14.63633  | 8.758589 | 14.61036 | 29.01765 | 10.69555 | 12.05975 |
| 19991 | PCDHB16   | 43.545   | 0.416468 | 0.403905 | 1.031103 | 0.302492 | 0.402269  | 34.15144  | 48.17224 | 29.22072 | 46.87467 | 55.61688 | 47.23404 |
| 15586 | PCDHB12   | 198.6041 | 0.416413 | 0.240479 | 1.731594 | 0.083346 | 0.142163  | 163.7101  | 213.4906 | 134.2762 | 183.0344 | 243.8586 | 253.2548 |
| 15130 | CFAP94    | 158.1673 | 0.416281 | 0.230078 | 1.809306 | 0.070404 | 0.123706  | 133.3532  | 153.8227 | 118.2743 | 162.9453 | 211.772  | 168.8366 |
| 6114  | GBF1      | 4802.338 | 0.416163 | 0.101192 | 4.112601 | 3.91E-05 | 0.00017   | 4024.449  | 4317.437 | 4008.108 | 5341.48  | 5067.553 | 6055.001 |
| 19029 | LOC103228 | 52.26447 | 0.416095 | 0.352767 | 1.179517 | 0.238192 | 0.332773  | 51.49821  | 42.15071 | 40.35242 | 60.26743 | 62.03421 | 57.28383 |
| 6354  | ACTR1A    | 6899.486 | 0.416055 | 0.103914 | 4.003848 | 6.23E-05 | 0.000261  | 6078.957  | 6035.763 | 5626.38  | 7741.016 | 7123.239 | 8791.56  |
| 6515  | PLEKHM3   | 1636.948 | 0.415969 | 0.105749 | 3.933549 | 8.37E-05 | 0.000342  | 1358.468  | 1514.141 | 1337.196 | 1819.183 | 1846.053 | 1946.645 |
| 19620 | LOC119624 | 65.39814 | 0.415794 | 0.384078 | 1.082575 | 0.278997 | 0.37804   | 71.01331  | 36.67659 | 61.92009 | 53.57105 | 72.72976 | 96.47803 |
| 11222 | CRABP2    | 310.0656 | 0.415779 | 0.161422 | 2.575727 | 0.010003 | 0.023697  | 269.959   | 259.4732 | 265.7694 | 379.4616 | 355.0924 | 330.6382 |
| 7164  | ATG9A     | 2435.174 | 0.415663 | 0.11308  | 3.675824 | 0.000237 | 0.00088   | 2000.841  | 2238.914 | 2026.665 | 2691.945 | 2541.263 | 3111.416 |
| 6433  | CEMIP2    | 8913.886 | 0.415642 | 0.104767 | 3.967313 | 7.27E-05 | 0.0003    | 7266.668  | 8455.323 | 7198.732 | 9953.054 | 9544.712 | 11064.82 |
| 23630 | LOC103232 | 8.941152 | 0.415518 | 0.895377 | 0.464071 | 0.642597 | 0.722955  | 12.46799  | 3.284471 | 6.957314 | 8.928508 | 14.97377 | 7.034856 |
| 11433 | ZFYVE27   | 1101.12  | 0.41529  | 0.16417  | 2.529636 | 0.011418 | 0.026552  | 1122.661  | 741.743  | 970.5453 | 1147.313 | 1189.346 | 1435.111 |
| 8287  | SLC9A8    | 705.5096 | 0.41501  | 0.125105 | 3.317289 | 0.000909 | 0.002916  | 621.7731  | 558.3601 | 635.2027 | 787.9408 | 810.7229 | 819.0583 |
| 20768 | LOC103220 | 39.05641 | 0.414997 | 0.456672 | 0.908741 | 0.363487 | 0.465315  | 29.81475  | 47.62483 | 22.2634  | 55.80317 | 40.6431  | 38.18922 |
| 22312 | ONECUT1   | 17.68781 | 0.414658 | 0.616058 | 0.673082 | 0.500895 | 0.596822  | 10.29964  | 15.32753 | 19.48048 | 24.5534  | 21.39111 | 15.07469 |
| 10665 | BDH1      | 567.711  | 0.414556 | 0.153539 | 2.7      | 0.006934 | 0.017284  | 562.1436  | 416.5804 | 533.626  | 667.406  | 663.1243 | 683.386  |
| 6315  | KLF13     | 4345.301 | 0.414201 | 0.103073 | 4.018508 | 5.86E-05 | 0.000247  | 3757.201  | 3791.922 | 3635.196 | 4854.876 | 4509.245 | 5523.367 |
| 23169 | LOC119620 | 10.2094  | 0.414164 | 0.775165 | 0.534292 | 0.59314  | 0.680591  | 10.84173  | 8.758589 | 6.957314 | 8.928508 | 10.69555 | 15.07469 |
| 7672  | SLC35A3   | 866.9036 | 0.413984 | 0.11819  | 3.502711 | 0.000461 | 0.001596  | 780.6044  | 703.4242 | 747.9112 | 1004.457 | 936.9305 | 1028.094 |
| 23593 | LOC119625 | 9.233951 | 0.413953 | 0.881431 | 0.469637 | 0.638614 | 0.719602  | 7.589209  | 4.926706 | 11.1317  | 4.464254 | 19.252   | 8.039836 |
| 5985  | PNMA1     | 2735.326 | 0.413799 | 0.099212 | 4.170874 | 3.03E-05 | 0.000135  | 2414.453  | 2419.56  | 2206.86  | 3091.496 | 2954.112 | 3325.477 |
| 21198 | LOC103236 | 26.33536 | 0.413454 | 0.486234 | 0.850319 | 0.395148 | 0.495566  | 25.447806 | 19.70683 | 22.2634  | 33.4819  | 29.94755 | 27.13445 |
| 11023 | ZNF350    | 420.6159 | 0.412976 | 0.157357 | 2.624447 | 0.008679 | 0.02093   | 314.4101  | 400.7054 | 367.3462 | 495.5322 | 466.3261 | 479.3752 |
| 11160 | BRMS1L    | 821.6103 | 0.412823 | 0.159401 | 2.589842 | 0.009602 | 0.022873  | 627.1939  | 862.1736 | 621.9838 | 1002.225 | 966.878  | 849.2077 |
| 23751 | CABP7     | 8.912583 | 0.412786 | 0.928619 | 0.444516 | 0.65667  | 0.734994  | 8.131296  | 4.379295 | 10.43597 | 2.232127 | 19.252   | 9.044815 |
| 7256  | DZIP1     | 8265.957 | 0.412745 | 0.113061 | 3.650644 | 0.000262 | 0.000958  | 6561.413  | 8254.423 | 6459.866 | 9261.095 | 9296.575 | 9762.371 |
| 14523 | REL       | 406.9809 | 0.412698 | 0.214984 | 1.919672 | 0.054899 | 0.100461  | 298.1475  | 476.2483 | 273.4224 | 433.0326 | 470.6043 | 490.43   |
| 15418 | HOGA1     | 243.5174 | 0.412365 | 0.234617 | 1.75761  | 0.078814 | 0.135898  | 253.1543  | 148.896  | 226.8084 | 263.391  | 250.2759 | 318.5785 |
| 7520  | ASL       | 2214.705 | 0.412294 | 0.116066 | 3.55224  | 0.000382 | 0.00135   | 2062.097  | 1659.753 | 1982.834 | 2453.108 | 2447.143 | 2683.295 |
| 22269 | LOC103245 | 17.02189 | 0.412148 | 0.606894 | 0.67911  | 0.497068 | 0.593406  | 13.55216  | 18.06459 | 12.52316 | 15.62489 | 19.252   | 23.11453 |
| 24239 | LOC119627 | 5.3106   | 0.412095 | 1.116126 | 0.369219 | 0.711965 | 0.780776  | 4.336691  | 1.642235 | 7.653045 | 8.928508 | 4.278221 | 5.024897 |
| 9123  | VIPAS39   | 1320.293 | 0.412078 | 0.133995 | 3.075314 | 0.002103 | 0.006128  | 1052.732  | 1338.969 | 1008.115 | 1459.811 | 1497.377 | 1564.753 |
| 22596 | MIA       | 19.86855 | 0.411977 | 0.659116 | 0.625044 | 0.531942 | 0.625849  | 23.30971  | 6.02153  | 21.56767 | 24.5534  | 25.66933 | 18.08963 |
| 20429 | LOC119615 | 33.49138 | 0.411279 | 0.429504 | 0.957566 | 0.338281 | 0.440218  | 29.27266  | 25.72836 | 31.30791 | 37.94616 | 38.50399 | 38.18922 |
| 6913  | MAPKBP1   | 2011.41  | 0.411247 | 0.109096 | 3.769604 | 0.000164 | 0.000629  | 1741.724  | 1653.184 | 1791.508 | 2229.895 | 2115.58  | 2536.568 |
| 14789 | LOC119620 | 163.5999 | 0.411212 | 0.219321 | 1.874933 | 0.060802 | 0.109299  | 151.2421  | 120.978  | 150.278  | 171.8738 | 188.2417 | 198.9859 |
| 24784 | LOC119627 | 3.131291 | 0.411036 | 1.448332 | 0.2838   | 0.776564 | 0.832962  | 3.794605  | 2.189647 | 2.087194 | 6.696381 | 0        | 4.019918 |
| 17220 | LOC103216 | 116.733  | 0.410913 | 0.280538 | 1.464731 | 0.142994 | 0.8220761 | 117.0907  | 75.54283 | 106.4469 | 147.3204 | 145.4595 | 108.5378 |
| 20381 | LOC119615 | 41.46511 | 0.410867 | 0.425907 | 0.964686 | 0.334702 | 0.436586  | 48.24569  | 25.72836 | 32.69937 | 42.41041 | 53.47777 | 46.22906 |
| 9790  | TAF11     | 651.7746 | 0.410825 | 0.141374 | 2.905941 | 0.003662 | 0.009943  | 597.3792  | 484.4595 | 596.9375 | 712.0485 | 787.1927 | 732.63   |
| 24856 | LOC119620 | 2.802849 | 0.410786 | 1.505923 | 0.27278  | 0.785022 | 0.839629  | 3.794605  | 1.094824 | 2.087194 | 6.696381 | 2.139111 | 1.004979 |
| 7677  | OSTF1     | 755.5506 | 0.410763 | 0.117396 | 3.498955 | 0.000467 | 0.001617  | 672.1871  | 633.3555 | 641.4643 | 843.744  | 864.2007 | 878.3521 |
| 11704 | CSAD      | 355.1213 | 0.410554 | 0.166115 | 2.471502 | 0.013455 | 0.030562  | 336.0935  | 264.3999 | 315.1663 | 386.158  | 412.8484 | 416.0615 |
| 8611  | GPRIN1    | 980.0439 | 0.410549 | 0.127267 | 3.22588  | 0.001256 | 0.003877  | 862.4594  | 793.1997 | 873.8386 | 1116.063 | 992.5473 | 1242.155 |
| 9756  | GRAMD2B   | 461.4864 | 0.410531 | 0.140826 | 2.915159 | 0.003555 | 0.009688  | 394.6389  | 399.0632 | 397.2626 | 482.1394 | 539.0559 | 556.7586 |
| 10481 | RNASET2   | 753.8259 | 0.410152 | 0.1492   | 2.749012 | 0.005978 | 0.015162  | 649.9616  | 558.9075 | 736.7795 | 874.9938 | 763.6625 | 938.6508 |
| 7549  | PALM      | 1104.438 | 0.410123 | 0.115763 | 3.54278  | 0.000396 | 0.001394  | 1002.86   | 872.027  | 972.6325 | 1279.009 | 1193.624 | 1306.473 |
| 6444  | CNTN1     | 3949.95  | 0.41007  | 0.103494 | 3.962254 | 7.42E-05 | 0.000306  | 3229.751  | 3759.077 | 3189.233 | 4618.271 | 4265.387 | 4637.98  |
| 5667  | MPZL1     | 7762.975 | 0.40995  | 0.094462 | 4.339855 | 1.43E-05 | 6.69E-05  | 6467.09   | 7256.491 | 6281.063 | 8794.58  | 8547.886 | 9230.736 |
| 10017 | DEF8      | 2146.78  | 0.409877 | 0.143451 | 2.857258 | 0.004273 | 0.011341  | 2069.686  | 1526.732 | 1940.395 | 2368.287 | 2162.641 | 2812.938 |
| 4510  | SOD1      | 10338.63 | 0.40944  | 0.081783 | 5.006404 | 5.55E-07 | 3.27E-06  | 8795.893  | 8849.459 | 8993.719 | 12057.95 | 12120.2  | 11214.57 |
| 7434  | NDUFA3    | 2167.209 | 0.4093   | 0.114128 | 3.586333 | 0.000335 | 0.001199  | 1749.313  | 2115.199 | 1721.239 | 2502.214 | 2395.804 | 2519.484 |
| 9674  | TOPORS    | 2945.781 | 0.409068 | 0.139229 | 2.938092 | 0.003301 | 0.009075  | 2243.153  | 3138.312 | 2211.034 | 3337.03  | 3341.291 | 3403.865 |
| 16086 | LOC119626 | 130.2103 | 0.408939 | 0.247995 | 1.648985 | 0.099152 | 0.163864  | 93.78094  | 116.0513 | 125.2316 | 138.3919 | 171.1289 | 136.6772 |
| 19744 | ROPN1L    | 56.53236 | 0.408878 | 0.385251 | 1.061329 | 0.28854  | 0.388515  | 59.6295   | 41.6033  | 43.83108 | 46.87467 | 91.98176 | 55.27387 |
| 6826  | DTX3      | 2323.683 | 0.408866 | 0.107366 | 3.808143 | 0.00014  | 0.000545  | 2024.693  | 1955.902 | 2016.23  | 2544.625 | 2445.003 | 2955.645 |
| 23287 | LOC119627 | 10.84719 | 0.408843 | 0.79305  | 0.515532 | 0.606182 | 0.692031  | 5.96295   | 13.13788 | 8.348776 | 15.62489 | 14.97377 | 7.034856 |
| 12217 | CLDN4     | 1566.992 | 0.408766 | 0.172913 | 2.363991 | 0.018079 | 0.039342  | 1592.65   | 1000.121 | 1450.6   | 1736.595 | 1548.716 | 2073.273 |
| 10658 | MRPL43    | 2304.277 | 0.408691 | 0.151273 | 2.701679 | 0.006899 | 0.017209  | 2192.739  | 1483.486 | 2263.91  | 2689.713 | 2631.106 | 2564.708 |
| 11273 | MELTF     | 1666.009 | 0.408458 | 0.159328 | 2.563633 | 0.010358 | 0.024426  | 1668      | 1111.246 | 1518.782 | 1977.665 | 1630.002 | 2090.357 |
| 7419  | LOC119625 | 7263.601 | 0.408149 | 0.113617 | 3.592325 | 0.000328 | 0.001174  | 5772.136  | 7236.237 | 5722.391 | 8203.067 | 7944.657 | 8703.122 |
| 24680 | SLC25A52  | 3.725516 | 0.408034 | 1.348815 | 0.302513 | 0.762261 | 0.821099  | 1.084173  | 1.642235 | 6.957314 | 2.232127 | 6.417332 | 4.019918 |
| 5542  | TMBIM1    | 5521.9   | 0.407977 | 0.09282  | 4.395367 | 1.11E-05 | 5.30E-05  | 4876.067  | 4720.332 | 4648.181 | 6249.956 | 5863.302 | 6773.562 |
| 17408 | LOC103235 | 96.88417 | 0.407952 | 0.285589 | 1.428457 | 0.15316  | 0.233904  | 73.18166  | 100.1764 | 76.53045 | 91.51721 | 128.3466 | 111.5527 |
| 13734 | PTS       | 350.8138 | 0.407854 | 0.197639 | 2.063626 | 0.039053 | 0.075595  | 320.9151  | 235.3871 | 346.4742 | 462.0503 | 389.3181 | 350.7378 |
| 23155 | LOC103228 | 12.37005 | 0.407737 | 0.760473 | 0.536163 | 0.591846 | 0.679466  | 9.215468  | 7.663765 | 14.61036 | 11.16063 | 23.53022 | 8.039836 |
| 19958 | ZNF30     | 41.5908  | 0.40766  | 0.393372 | 1.036321 | 0.300053 | 0.399684  | 37.40396  | 32.2973  | 36.87376 | 53.57105 | 49.19955 | 40.19918 |
| 4398  | ARL6IP5   | 8864.259 | 0.407604 | 0.0802   | 5.08236  | 3.73E-07 | 2.25E-06  | 7786.529  | 7338.055 |          |          |          |          |



|       |           |          |          |          |          |          |          |          |          |          |          |          |          |
|-------|-----------|----------|----------|----------|----------|----------|----------|----------|----------|----------|----------|----------|----------|
| 11451 | PPP1R3E   | 330.2572 | 0.405795 | 0.160624 | 2.52637  | 0.011525 | 0.026754 | 262.9119 | 308.7403 | 281.0755 | 368.301  | 378.6226 | 381.8922 |
| 7052  | TLR2      | 980.3471 | 0.405076 | 0.10914  | 3.711526 | 0.000206 | 0.000777 | 852.7019 | 853.415  | 826.5289 | 1104.903 | 1088.807 | 1155.726 |
| 10136 | ZDHHC12   | 453.4188 | 0.404975 | 0.143058 | 2.830845 | 0.004643 | 0.01218  | 389.7601 | 376.6193 | 407.0029 | 482.1394 | 511.2474 | 553.7437 |
| 6516  | CDIPT     | 3512.633 | 0.404889 | 0.102936 | 3.933425 | 8.37E-05 | 0.000342 | 3079.051 | 3063.864 | 2932.508 | 3903.99  | 3666.436 | 4429.95  |
| 22885 | LOC103232 | 14.00484 | 0.404851 | 0.695575 | 0.582037 | 0.560541 | 0.651169 | 13.55216 | 13.6853  | 8.348776 | 24.5534  | 12.83466 | 11.05477 |
| 9564  | PLPPR2    | 970.2588 | 0.404845 | 0.136371 | 2.96869  | 0.002991 | 0.008314 | 867.3382 | 758.7128 | 883.5788 | 1122.76  | 954.0434 | 1235.12  |
| 9579  | GFFR4     | 1985.623 | 0.404698 | 0.136462 | 2.965643 | 0.003021 | 0.008383 | 1807.316 | 1430.387 | 1893.781 | 2258.913 | 2012.903 | 2510.439 |
| 10115 | SNX8      | 1190.158 | 0.404644 | 0.142747 | 2.834697 | 0.004587 | 0.012057 | 1134.045 | 852.3202 | 1090.907 | 1285.705 | 1268.493 | 1509.479 |
| 13208 | DECR2     | 610.5527 | 0.404385 | 0.186689 | 2.166091 | 0.030304 | 0.060996 | 608.2209 | 389.7572 | 580.9357 | 716.5128 | 601.0901 | 766.7993 |
| 4725  | MYL6      | 25870.12 | 0.404338 | 0.083308 | 4.866824 | 1.13E-06 | 6.38E-06 | 21608.65 | 22186.6  | 23005.05 | 30033.27 | 30525.11 | 27862.05 |
| 12900 | LOC119615 | 253.6734 | 0.404101 | 0.182092 | 2.219215 | 0.026472 | 0.054561 | 210.8716 | 229.913  | 217.0682 | 272.3195 | 265.2497 | 326.6183 |
| 23328 | LOC119620 | 10.53647 | 0.403581 | 0.791811 | 0.509694 | 0.610266 | 0.69547  | 10.29964 | 5.474118 | 11.1317  | 11.16063 | 17.11289 | 8.039836 |
| 15803 | PPII6     | 154.1644 | 0.403572 | 0.237283 | 1.700804 | 0.08898  | 0.149688 | 137.1479 | 147.2538 | 112.0128 | 165.1774 | 209.6328 | 153.7619 |
| 9028  | DCAF5     | 2630.169 | 0.403521 | 0.129918 | 3.105968 | 0.001897 | 0.005585 | 2064.265 | 2703.12  | 2028.753 | 2903.997 | 2892.078 | 3188.8   |
| 6992  | TTYH3     | 3527.118 | 0.403066 | 0.107843 | 3.737544 | 0.000186 | 0.000707 | 3056.825 | 2873.912 | 3188.537 | 4013.364 | 3600.123 | 4429.95  |
| 4871  | TM7SF3    | 8609.725 | 0.402982 | 0.084683 | 4.75872  | 1.95E-06 | 1.06E-05 | 7636.913 | 7318.896 | 7294.048 | 9676.27  | 9412.087 | 10320.13 |
| 16062 | LOC119625 | 172.2054 | 0.402938 | 0.243499 | 1.654779 | 0.097969 | 0.162154 | 145.8212 | 128.6418 | 168.367  | 187.4987 | 248.1368 | 154.7668 |
| 14352 | ZNF571    | 177.0288 | 0.402916 | 0.206363 | 1.952459 | 0.050884 | 0.094257 | 160.4576 | 149.4434 | 146.7993 | 227.677  | 181.8244 | 195.971  |
| 16033 | LOC103244 | 143.1922 | 0.40258  | 0.242498 | 1.660139 | 0.096886 | 0.160643 | 134.9795 | 119.8832 | 112.7085 | 167.4095 | 192.52   | 131.6523 |
| 16765 | FAM110A   | 106.754  | 0.402498 | 0.262971 | 1.530582 | 0.125873 | 0.199602 | 96.49137 | 85.94365 | 91.83654 | 145.0883 | 117.6511 | 103.5129 |
| 17221 | LOC103222 | 101.1618 | 0.402299 | 0.274729 | 1.464348 | 0.143099 | 0.22091  | 74.26583 | 100.7238 | 85.57496 | 133.9276 | 106.9555 | 105.5228 |
| 11926 | ZNF606    | 438.425  | 0.402131 | 0.166208 | 2.419444 | 0.015544 | 0.034651 | 346.3932 | 442.8562 | 342.9956 | 464.2824 | 547.6123 | 486.4101 |
| 19243 | YY2       | 67.1912  | 0.402073 | 0.350941 | 1.145702 | 0.251919 | 0.348048 | 71.5554  | 60.2153  | 41.74388 | 60.26743 | 91.98176 | 77.38342 |
| 8617  | PRKD2     | 740.8985 | 0.402047 | 0.124675 | 3.224752 | 0.001261 | 0.00389  | 604.4263 | 641.5666 | 672.0765 | 839.2797 | 793.6101 | 894.4317 |
| 11186 | TCTA      | 543.3447 | 0.401674 | 0.155402 | 2.584744 | 0.009745 | 0.023161 | 512.8137 | 401.8003 | 493.2735 | 584.8173 | 583.9772 | 683.386  |
| 9030  | SNX14     | 903.9196 | 0.401543 | 0.129321 | 3.105009 | 0.001903 | 0.005602 | 707.4227 | 879.1434 | 748.607  | 1062.492 | 1028.912 | 996.9396 |
| 16921 | MATK      | 130.6404 | 0.401378 | 0.267046 | 1.503026 | 0.132832 | 0.208696 | 125.222  | 87.03848 | 127.3188 | 120.5349 | 151.8769 | 171.8515 |
| 9721  | SPHK2     | 652.7864 | 0.401271 | 0.137209 | 2.924529 | 0.00345  | 0.009434 | 552.386  | 511.83   | 624.7668 | 776.7802 | 695.211  | 755.7446 |
| 11202 | LOC119626 | 478.5461 | 0.401146 | 0.155356 | 2.582103 | 0.00982  | 0.023305 | 395.181  | 452.7096 | 392.3925 | 549.1032 | 474.8826 | 607.0076 |
| 7135  | HSD17B4   | 5815.735 | 0.400956 | 0.108806 | 3.685045 | 0.000229 | 0.000852 | 4765.481 | 5694.725 | 4580     | 6310.223 | 6622.687 | 6921.294 |
| 7017  | PDCD10    | 3977.941 | 0.400827 | 0.107526 | 3.727727 | 0.000193 | 0.000732 | 3436.828 | 3178.273 | 3667.2   | 4475.415 | 4973.432 | 4136.495 |
| 7508  | ZNF862    | 1661.146 | 0.400804 | 0.112723 | 3.555656 | 0.000377 | 0.001335 | 1503.206 | 1369.624 | 1427.641 | 1897.308 | 1704.871 | 2064.228 |
| 13871 | IL7       | 247.0897 | 0.400726 | 0.196807 | 2.036136 | 0.041737 | 0.079992 | 233.0971 | 180.6459 | 224.0255 | 265.6231 | 320.8666 | 258.2797 |
| 22009 | LOC103233 | 32.79859 | 0.400657 | 0.553258 | 0.724177 | 0.468957 | 0.56646  | 23.8518  | 26.82318 | 32.69937 | 46.87467 | 53.47777 | 13.06473 |
| 10664 | MBD6      | 829.4652 | 0.400565 | 0.148341 | 2.700298 | 0.006928 | 0.017271 | 633.699  | 860.5314 | 649.8131 | 953.1182 | 954.0434 | 925.5861 |
| 6102  | SH2B3     | 4482.564 | 0.400535 | 0.097192 | 4.121074 | 3.77E-05 | 0.000164 | 3852.066 | 4046.468 | 3699.899 | 4982.107 | 4789.469 | 5525.377 |
| 14716 | ZNF790    | 198.1921 | 0.400244 | 0.212119 | 1.886885 | 0.059176 | 0.106903 | 162.0838 | 203.6372 | 147.4951 | 214.2842 | 222.4675 | 239.1851 |
| 10538 | INTS9     | 752.8032 | 0.400007 | 0.146156 | 2.736846 | 0.006203 | 0.015649 | 645.6249 | 723.131  | 582.3272 | 828.1191 | 765.8016 | 971.8151 |
| 22874 | LOC119624 | 18.26981 | 0.399765 | 0.686036 | 0.582717 | 0.560084 | 0.650971 | 21.68345 | 14.23271 | 10.43597 | 17.85702 | 36.36488 | 9.044815 |
| 18962 | LOC119627 | 77.88623 | 0.399647 | 0.334956 | 1.193131 | 0.232818 | 0.326414 | 88.90216 | 49.81448 | 62.61582 | 102.6778 | 74.86887 | 88.43819 |
| 24387 | STMN2     | 4.690694 | 0.399645 | 1.146993 | 0.348429 | 0.727518 | 0.79309  | 3.794605 | 5.474118 | 2.782925 | 8.928508 | 2.139111 | 5.024897 |
| 7886  | BCL2      | 3079.82  | 0.39961  | 0.115981 | 3.445474 | 0.00057  | 0.001922 | 2426.379 | 2992.7   | 2553.334 | 3272.298 | 3418.299 | 3815.907 |
| 15466 | LOC103247 | 140.2033 | 0.399573 | 0.228271 | 1.750436 | 0.080043 | 0.137589 | 133.8953 | 107.8401 | 121.0573 | 151.7846 | 166.8506 | 159.7917 |
| 9529  | TANGO2    | 556.42   | 0.399313 | 0.134136 | 2.976922 | 0.002912 | 0.008123 | 515.5241 | 470.7742 | 453.6169 | 607.1385 | 650.2896 | 641.1769 |
| 14693 | LOC119628 | 174.0835 | 0.399259 | 0.211117 | 1.891178 | 0.058601 | 0.10603  | 138.7741 | 160.3917 | 149.5822 | 223.2127 | 194.6591 | 177.8814 |
| 24029 | LOC103238 | 6.530366 | 0.399204 | 0.992212 | 0.402338 | 0.687436 | 0.760559 | 6.505036 | 4.379295 | 5.565851 | 11.16063 | 8.556443 | 3.014938 |
| 5509  | SLC33A1   | 3647.504 | 0.399197 | 0.090573 | 4.407481 | 1.05E-05 | 5.05E-05 | 3108.323 | 3293.229 | 3039.65  | 4111.578 | 4010.833 | 4321.412 |
| 19220 | PRSS53    | 60.80062 | 0.399014 | 0.346654 | 1.151045 | 0.249714 | 0.345407 | 58.54533 | 45.43518 | 53.57132 | 51.33892 | 85.56443 | 70.34856 |
| 23040 | LOC119629 | 13.081   | 0.399002 | 0.718014 | 0.555702 | 0.578415 | 0.667411 | 13.01007 | 10.40082 | 9.740239 | 22.32127 | 14.97377 | 8.039836 |
| 12169 | ESRRA     | 1475.254 | 0.398948 | 0.168197 | 2.371909 | 0.017696 | 0.038661 | 1475.559 | 938.2638 | 1407.465 | 1555.793 | 1585.081 | 1889.361 |
| 7859  | HM13      | 5167.008 | 0.398614 | 0.115493 | 3.45142  | 0.000558 | 0.001886 | 4109.015 | 5122.68  | 4143.776 | 5964.243 | 5435.48  | 6226.853 |
| 8803  | PNKD      | 1608.587 | 0.398493 | 0.125595 | 3.172849 | 0.00151  | 0.004558 | 1546.572 | 1196.095 | 1422.771 | 1872.755 | 1704.871 | 1908.456 |
| 22995 | LOC103216 | 12.48281 | 0.398464 | 0.70572  | 0.56462  | 0.572332 | 0.661685 | 8.673382 | 9.306001 | 14.61036 | 13.39276 | 12.83466 | 16.07967 |
| 5754  | BLOC1S2   | 2846.911 | 0.398426 | 0.092723 | 4.296927 | 1.73E-05 | 8.00E-05 | 2478.419 | 2472.112 | 2414.884 | 3171.852 | 3441.829 | 3102.372 |
| 10066 | ADCY9     | 668.1214 | 0.398252 | 0.139882 | 2.847047 | 0.004413 | 0.011654 | 567.0223 | 578.0669 | 588.5887 | 774.5481 | 650.2896 | 850.2126 |
| 7373  | SMYD4     | 1127.496 | 0.398101 | 0.110315 | 3.608763 | 0.000308 | 0.001109 | 1013.159 | 911.4407 | 996.2873 | 1247.759 | 1272.771 | 1323.558 |
| 20320 | EFCC1     | 48.07291 | 0.397853 | 0.408192 | 0.974671 | 0.329724 | 0.431383 | 40.11439 | 47.62483 | 35.4823  | 46.87467 | 79.14709 | 39.1942  |
| 5945  | SEC24C    | 9161.935 | 0.397471 | 0.094908 | 4.187957 | 2.81E-05 | 0.000126 | 8150.811 | 7665.408 | 7914.64  | 10053.5  | 9758.623 | 11428.63 |
| 25479 | TRNAT-AG  | 1.249988 | 0.397422 | 2.366977 | 0.167903 | 0.86666  | 0.904244 | 2.710432 | 0.547412 | 0        | 2.232127 | 0        | 2.009959 |
| 7511  | MAP3K7    | 2472.19  | 0.397342 | 0.111775 | 3.554821 | 0.000378 | 0.001339 | 1993.252 | 2406.422 | 2003.706 | 2810.248 | 2691.001 | 2928.51  |
| 9911  | QSER1     | 2397.535 | 0.39724  | 0.13786  | 2.881484 | 0.003958 | 0.010617 | 1875.077 | 2529.043 | 1805.423 | 2709.802 | 2609.715 | 2856.152 |
| 17513 | KCNJ4     | 126.6793 | 0.397193 | 0.281232 | 1.41233  | 0.157853 | 0.239623 | 113.2961 | 76.63765 | 138.4505 | 131.6955 | 158.2942 | 141.7021 |
| 22887 | LOC119620 | 14.34514 | 0.396871 | 0.682245 | 0.581713 | 0.56076  | 0.651366 | 16.80468 | 12.04306 | 8.348776 | 20.08914 | 10.69555 | 18.08963 |
| 22734 | SLC2A4    | 17.63438 | 0.396594 | 0.656978 | 0.603665 | 0.546067 | 0.638567 | 17.34676 | 16.42235 | 11.1317  | 15.62489 | 34.22577 | 11.05477 |
| 15273 | LOC103227 | 147.9705 | 0.396496 | 0.222193 | 1.784464 | 0.074348 | 0.129415 | 134.4374 | 126.4521 | 123.1445 | 145.0883 | 181.8244 | 176.8764 |
| 9812  | HMGN3     | 1182.87  | 0.39613  | 0.136484 | 2.902391 | 0.003703 | 0.010034 | 889.0216 | 1207.043 | 967.7623 | 1337.044 | 1364.753 | 1331.598 |
| 11234 | LOC119626 | 427.0683 | 0.396052 | 0.153884 | 2.373706 | 0.010062 | 0.023808 | 355.0666 | 358.5547 | 396.5669 | 468.7467 | 442.7959 | 540.679  |
| 5393  | GMFB      | 3556.845 | 0.395989 | 0.088659 | 4.466424 | 7.95E-06 | 3.92E-05 | 3200.478 | 2943.433 | 3073.045 | 4037.918 | 3963.772 | 4122.426 |
| 21703 | LOC119628 | 26.53713 | 0.395909 | 0.509309 | 0.777346 | 0.436955 | 0.535246 | 20.0572  | 20.80165 | 27.13352 | 40.17829 | 29.94755 | 21.10457 |
| 8985  | NIN       | 5276.332 | 0.395831 | 0.126814 | 3.12135  | 0.0018   | 0.005327 | 4085.163 | 5490     |          |          |          |          |



|       |          |          |          |          |          |          |          |          |          |          |          |          |          |
|-------|----------|----------|----------|----------|----------|----------|----------|----------|----------|----------|----------|----------|----------|
| 7282  | TEP1     | 5533.18  | 0.395202 | 0.108601 | 3.639016 | 0.000274 | 0.000999 | 4859.804 | 4511.768 | 4976.566 | 6051.296 | 5696.452 | 7103.195 |
| 24638 | TRNAQ-UL | 3.740357 | 0.395153 | 1.27806  | 0.309182 | 0.757183 | 0.817019 | 4.336691 | 1.642235 | 3.478657 | 6.696381 | 4.278221 | 2.009959 |
| 20191 | LOC10323 | 45.60372 | 0.395035 | 0.395672 | 0.99839  | 0.31809  | 0.418822 | 33.60935 | 45.43518 | 39.65669 | 60.26743 | 36.36488 | 58.28881 |
| 12518 | BBC3     | 860.1788 | 0.394773 | 0.171777 | 2.298177 | 0.021552 | 0.04577  | 826.6817 | 547.4118 | 857.141  | 988.8323 | 921.9567 | 1019.049 |
| 8401  | TRADD    | 816.5158 | 0.394753 | 0.120253 | 3.282699 | 0.001028 | 0.003254 | 700.9177 | 699.0449 | 719.3862 | 948.654  | 849.2269 | 981.8649 |
| 8795  | ACSF2    | 1352.137 | 0.394736 | 0.124297 | 3.175743 | 0.001495 | 0.004518 | 1175.785 | 1280.396 | 1052.642 | 1444.186 | 1467.43  | 1692.385 |
| 19092 | LOC11962 | 66.08128 | 0.394666 | 0.337001 | 1.171112 | 0.241554 | 0.336349 | 67.7608  | 42.15071 | 61.22436 | 78.12444 | 74.86887 | 72.35852 |
| 24629 | TRNAW-CC | 3.77271  | 0.394289 | 1.26872  | 0.310777 | 0.75597  | 0.816008 | 1.626259 | 3.284471 | 4.87012  | 6.696381 | 2.139111 | 4.019918 |
| 25294 | LOC11961 | 1.572243 | 0.394042 | 1.974178 | 0.199598 | 0.841795 | 0.88476  | 1.626259 | 1.642235 | 0.695731 | 4.464254 | 0        | 1.004979 |
| 23215 | ASB16    | 17.54865 | 0.393933 | 0.746841 | 0.527465 | 0.59787  | 0.68466  | 12.46799 | 12.59047 | 19.48048 | 26.78552 | 29.94755 | 4.019918 |
| 23199 | CA13     | 14.56057 | 0.39378  | 0.743333 | 0.529749 | 0.596286 | 0.683306 | 9.757555 | 19.70683 | 7.653045 | 13.39276 | 27.80844 | 9.044815 |
| 18076 | HBQ1     | 99.8515  | 0.39359  | 0.296281 | 1.328435 | 0.184034 | 0.270666 | 95.4072  | 64.59459 | 100.1853 | 118.3027 | 91.98176 | 128.6374 |
| 6577  | GALK2    | 2327.682 | 0.393319 | 0.100596 | 3.909884 | 9.23E-05 | 0.000373 | 2100.585 | 1967.945 | 1973.79  | 2537.928 | 2532.707 | 2853.137 |
| 17274 | LOC11962 | 104.1561 | 0.393161 | 0.270377 | 1.454119 | 0.145913 | 0.224563 | 85.10756 | 106.1979 | 77.92191 | 133.9276 | 111.2338 | 110.5477 |
| 13202 | TECPR2   | 251.4761 | 0.393111 | 0.181284 | 2.168479 | 0.030122 | 0.060657 | 237.4338 | 195.426  | 218.4597 | 285.7123 | 299.4755 | 272.3494 |
| 9086  | ALDH3B1  | 731.8724 | 0.393058 | 0.127299 | 3.087664 | 0.002017 | 0.005903 | 677.0659 | 595.0366 | 628.2454 | 770.0838 | 853.5052 | 867.2973 |
| 24378 | LOC11962 | 5.003645 | 0.392866 | 1.123578 | 0.349656 | 0.726597 | 0.792313 | 6.505036 | 1.642235 | 4.87012  | 6.696381 | 4.278221 | 6.029877 |
| 12950 | PARD6A   | 396.8715 | 0.392855 | 0.17753  | 2.212899 | 0.026905 | 0.055232 | 363.74   | 276.9904 | 387.5224 | 488.8358 | 447.0741 | 417.0665 |
| 8757  | PPP2R1A  | 7756.508 | 0.392572 | 0.123211 | 3.186191 | 0.001442 | 0.004377 | 7345.27  | 5848.548 | 6935.746 | 8508.868 | 7871.927 | 10028.69 |
| 7126  | H6PD     | 8973.781 | 0.392543 | 0.106437 | 3.688032 | 0.000226 | 0.000843 | 7847.784 | 7681.83  | 7759.492 | 10062.43 | 8982.126 | 11509.02 |
| 21800 | LOC11962 | 26.9738  | 0.39242  | 0.516522 | 0.759736 | 0.447412 | 0.545617 | 22.22554 | 28.46541 | 18.78475 | 22.32127 | 44.92132 | 25.12449 |
| 24334 | LOC11962 | 5.323367 | 0.3924   | 1.099268 | 0.356965 | 0.721118 | 0.787825 | 2.168345 | 3.284471 | 8.348776 | 6.696381 | 6.417332 | 5.024897 |
| 7974  | DYNC1LI1 | 4037.995 | 0.392011 | 0.114683 | 3.418208 | 0.00063  | 0.002102 | 3335.457 | 4015.813 | 3128.008 | 4609.342 | 4378.76  | 4760.588 |
| 22517 | NMB      | 19.63481 | 0.39172  | 0.614177 | 0.637798 | 0.523605 | 0.61825  | 25.47806 | 9.853413 | 16.00182 | 20.08914 | 19.252   | 27.13445 |
| 8663  | OGA      | 10447.09 | 0.391667 | 0.121893 | 3.213219 | 0.001313 | 0.004028 | 8010.952 | 10778.54 | 8325.122 | 11424.03 | 11722.33 | 12421.55 |
| 9320  | RABGAP1L | 909.5278 | 0.391594 | 0.129404 | 3.026146 | 0.002477 | 0.007065 | 777.3519 | 878.596  | 706.1673 | 1006.689 | 998.9647 | 1089.398 |
| 22627 | LOC10322 | 16.58433 | 0.391584 | 0.632018 | 0.619577 | 0.535536 | 0.629214 | 10.84173 | 11.49565 | 20.87194 | 20.08914 | 17.11289 | 19.09461 |
| 22076 | LOC11962 | 20.28688 | 0.391379 | 0.548836 | 0.713107 | 0.47578  | 0.572957 | 16.80468 | 17.51718 | 18.78475 | 20.08914 | 21.39111 | 27.13445 |
| 21450 | LOC10321 | 44.36442 | 0.391253 | 0.482291 | 0.811238 | 0.417229 | 0.517111 | 20.59928 | 61.85754 | 32.69937 | 60.26743 | 38.50399 | 52.25893 |
| 14772 | LOC10323 | 487.323  | 0.390828 | 0.208114 | 1.87795  | 0.060388 | 0.10868  | 541.0022 | 308.7403 | 414.6559 | 491.0679 | 643.8723 | 524.5993 |
| 5055  | ARPC3    | 6732.574 | 0.390638 | 0.083865 | 4.657936 | 3.19E-06 | 1.68E-05 | 6011.196 | 5551.303 | 5915.804 | 7658.428 | 7758.554 | 7500.162 |
| 9901  | SLC25A16 | 551.4986 | 0.390242 | 0.135281 | 2.884674 | 0.003918 | 0.010521 | 461.8576 | 451.0673 | 519.0156 | 638.3883 | 624.6203 | 614.0425 |
| 13463 | LOC10324 | 454.0849 | 0.390104 | 0.184457 | 2.114881 | 0.03444  | 0.068008 | 469.9889 | 314.7618 | 397.2626 | 468.7467 | 489.8563 | 583.8931 |
| 7715  | CEP170B  | 2165.293 | 0.389856 | 0.111751 | 3.488601 | 0.000486 | 0.001673 | 1931.996 | 1722.158 | 1975.181 | 2395.072 | 2276.014 | 2691.335 |
| 17390 | LOC10323 | 129.5143 | 0.389778 | 0.27247  | 1.430535 | 0.152563 | 0.233232 | 127.3903 | 82.11177 | 125.9274 | 174.1059 | 136.9031 | 130.6473 |
| 16205 | LOC10322 | 193.9194 | 0.389178 | 0.23926  | 1.626592 | 0.103824 | 0.170327 | 196.2353 | 154.9175 | 155.8438 | 169.6417 | 207.4937 | 279.3843 |
| 10438 | NAPRT    | 3209.954 | 0.389041 | 0.1411   | 2.757199 | 0.00583  | 0.014847 | 3120.249 | 2221.945 | 3001.385 | 3575.867 | 3294.23  | 4046.047 |
| 23970 | C4BPA    | 6.562161 | 0.389003 | 0.945201 | 0.411556 | 0.680665 | 0.754922 | 7.047123 | 4.379295 | 5.565851 | 8.928508 | 6.417332 | 7.034856 |
| 21443 | LOC10323 | 31.36742 | 0.388376 | 0.478088 | 0.812352 | 0.41659  | 0.516439 | 24.93597 | 33.39212 | 22.95914 | 24.5534  | 49.19955 | 33.16432 |
| 22356 | LOC10324 | 24.95823 | 0.388265 | 0.582792 | 0.662615 | 0.505274 | 0.600827 | 17.88885 | 12.04306 | 35.4823  | 20.08914 | 32.08666 | 32.15934 |
| 10169 | ORAI2    | 1750.547 | 0.388244 | 0.13758  | 2.821947 | 0.004773 | 0.012479 | 1685.889 | 1234.961 | 1631.49  | 1973.2   | 1848.192 | 2129.551 |
| 7155  | OSBPL10  | 2502.955 | 0.388097 | 0.105507 | 3.678409 | 0.000235 | 0.000872 | 2114.679 | 2378.504 | 2014.142 | 2796.855 | 2733.783 | 2979.764 |
| 13752 | B3GALT1  | 259.6462 | 0.388072 | 0.188589 | 2.05777  | 0.039612 | 0.076577 | 236.8917 | 249.0724 | 188.5432 | 305.8014 | 278.0844 | 299.4839 |
| 11034 | DZANK1   | 399.6228 | 0.387799 | 0.147866 | 2.622646 | 0.008725 | 0.021022 | 332.2989 | 369.503  | 337.4297 | 433.0326 | 464.187  | 461.2856 |
| 22839 | LOC11962 | 15.57769 | 0.387548 | 0.659991 | 0.587203 | 0.557068 | 0.648437 | 19.51511 | 11.49565 | 9.044508 | 20.08914 | 19.252   | 14.06971 |
| 17415 | DES      | 94.54138 | 0.387521 | 0.271551 | 1.427067 | 0.153561 | 0.234419 | 80.77087 | 90.87036 | 73.05179 | 113.8385 | 111.2338 | 97.48301 |
| 14554 | MFSD9    | 204.0662 | 0.387483 | 0.202232 | 1.916033 | 0.055361 | 0.101125 | 188.104  | 158.7494 | 185.0645 | 243.3018 | 198.9373 | 250.2399 |
| 8853  | LOC10322 | 3137.685 | 0.387481 | 0.122768 | 3.156209 | 0.001598 | 0.0048   | 2997.738 | 2352.776 | 2811.45  | 3361.583 | 3351.986 | 3950.574 |
| 5491  | ARFIP1   | 3097.679 | 0.387434 | 0.087771 | 4.414143 | 1.01E-05 | 4.91E-05 | 2787.408 | 2624.292 | 2640.996 | 3488.814 | 3523.115 | 3521.448 |
| 10928 | FLN      | 2204.481 | 0.387219 | 0.146376 | 2.645366 | 0.00816  | 0.019852 | 2188.014 | 1511.404 | 2035.014 | 2470.965 | 2267.457 | 2753.644 |
| 14808 | NAT14    | 695.8118 | 0.387115 | 0.206885 | 1.871161 | 0.061323 | 0.110094 | 689.5339 | 410.0114 | 712.4289 | 792.4051 | 660.9852 | 909.5064 |
| 7661  | HACD2    | 4201.315 | 0.386825 | 0.110325 | 3.506229 | 0.000455 | 0.001577 | 3445.501 | 4132.959 | 3346.468 | 4495.504 | 4926.372 | 4861.086 |
| 21650 | LOC11962 | 31.67322 | 0.386501 | 0.493574 | 0.783066 | 0.433588 | 0.532418 | 33.60935 | 21.34906 | 26.43779 | 53.57105 | 29.94755 | 25.12449 |
| 15510 | LRRCS6   | 163.4587 | 0.386359 | 0.221804 | 1.741895 | 0.081527 | 0.139742 | 139.3162 | 121.5254 | 164.8883 | 185.2665 | 181.8244 | 187.9312 |
| 7546  | SIAE     | 1156.936 | 0.386284 | 0.108993 | 3.544114 | 0.000394 | 0.001388 | 1002.86  | 1023.113 | 986.5471 | 1294.634 | 1238.545 | 1395.916 |
| 21432 | LOC10323 | 35.63407 | 0.38623  | 0.474731 | 0.813576 | 0.415888 | 0.515834 | 37.40396 | 20.80165 | 33.39511 | 46.87467 | 49.19955 | 26.12947 |
| 7810  | LONP2    | 3567.627 | 0.386102 | 0.111499 | 3.462826 | 0.000535 | 0.00182  | 2925.64  | 3540.112 | 2813.538 | 4024.525 | 3991.581 | 4110.366 |
| 10258 | PTOV1    | 2846.5   | 0.38601  | 0.137862 | 2.799965 | 0.005111 | 0.013245 | 2683.328 | 2056.079 | 2670.217 | 3113.817 | 2864.269 | 3691.29  |
| 10469 | LOC10323 | 1635.134 | 0.385856 | 0.140226 | 2.751669 | 0.005929 | 0.015057 | 1261.977 | 1717.231 | 1275.276 | 1874.987 | 1732.68  | 1948.655 |
| 22940 | LOC10324 | 14.3408  | 0.385729 | 0.673009 | 0.573141 | 0.566549 | 0.65657  | 8.673382 | 13.6853  | 14.61036 | 15.62489 | 21.39111 | 12.05975 |
| 23729 | LOC11962 | 8.131313 | 0.385561 | 0.857887 | 0.449431 | 0.653121 | 0.731741 | 8.673382 | 4.926706 | 7.653045 | 8.928508 | 8.556443 | 10.04979 |
| 23461 | LOC11962 | 9.708882 | 0.385346 | 0.785076 | 0.490839 | 0.623354 | 0.706561 | 7.047123 | 9.853413 | 8.348776 | 13.39276 | 8.556443 | 11.05477 |
| 24566 | LOC11962 | 4.369786 | 0.385341 | 1.19975  | 0.321184 | 0.748071 | 0.809552 | 2.168345 | 6.02153  | 3.478657 | 2.232127 | 4.278221 | 8.039836 |
| 19250 | PAPPA2   | 81.90811 | 0.385178 | 0.336477 | 1.144737 | 0.252318 | 0.348461 | 56.91907 | 80.46954 | 73.74753 | 98.21359 | 119.7902 | 62.30873 |
| 12634 | NFATC1   | 301.9712 | 0.384675 | 0.169137 | 2.274342 | 0.022945 | 0.048283 | 240.1443 | 290.1283 | 256.0291 | 328.1227 | 348.675  | 348.7279 |
| 7083  | PLOD3    | 4744.586 | 0.384565 | 0.103885 | 3.701823 | 0.000214 | 0.000803 | 4187.075 | 4063.438 | 4104.815 | 5263.355 | 4845.086 | 6003.747 |
| 24317 | ANXA2R   | 5.303744 | 0.384474 | 1.071577 | 0.388793 | 0.71975  | 0.78688  | 4.878777 | 4.379295 | 4.87012  | 2.232127 | 6.417332 | 9.044815 |
| 6098  | SQOR     | 5032.649 | 0.384323 | 0.093239 | 4.121913 | 3.76E-05 | 0.000164 | 4497.691 | 4356.303 | 4250.919 | 5531.211 | 5401.254 | 6158.514 |
| 20809 | USP43    | 37.41793 | 0.384316 | 0.425509 | 0.903191 | 0.366424 | 0.468134 | 34.15144 | 27.37059 | 36.17803 | 31.24978 | 51.33866 | 44.2191  |
| 12060 | LOC11962 | 325      |          |          |          |          |          |          |          |          |          |          |          |



|       |           |          |          |          |          |          |          |          |          |          |          |          |          |
|-------|-----------|----------|----------|----------|----------|----------|----------|----------|----------|----------|----------|----------|----------|
| 12845 | RNPEPL1   | 1766.355 | 0.383297 | 0.1719   | 2.229776 | 0.025762 | 0.05332  | 1734.676 | 1128.216 | 1740.024 | 2026.771 | 1694.176 | 2274.269 |
| 19734 | LOC119621 | 63.88583 | 0.383293 | 0.360396 | 1.063532 | 0.287541 | 0.387366 | 46.61943 | 53.09895 | 67.48594 | 46.87467 | 89.84265 | 79.39338 |
| 18004 | LOC103241 | 84.78086 | 0.383206 | 0.285528 | 1.342096 | 0.179565 | 0.265148 | 67.21871 | 81.01695 | 71.66033 | 109.3742 | 91.98176 | 87.43321 |
| 8648  | TBC1D2    | 2453.626 | 0.382957 | 0.119086 | 3.215818 | 0.001301 | 0.003998 | 2250.201 | 1982.726 | 2163.725 | 2669.624 | 2487.786 | 3167.695 |
| 7161  | TMEM214   | 3075.76  | 0.382941 | 0.104167 | 3.676211 | 0.000237 | 0.000879 | 2620.446 | 2829.572 | 2565.857 | 3245.513 | 3371.238 | 3821.937 |
| 8632  | P3H1      | 1982.411 | 0.382744 | 0.11888  | 3.219581 | 0.001284 | 0.003954 | 1712.993 | 1791.679 | 1664.189 | 2241.055 | 1953.008 | 2531.543 |
| 24975 | LOC119621 | 2.786918 | 0.382724 | 1.523107 | 0.251278 | 0.001599 | 0.853305 | 2.168345 | 1.642235 | 3.478657 | 0        | 6.417332 | 3.014938 |
| 10029 | NAP1L3    | 573.5263 | 0.382587 | 0.134002 | 2.85509  | 0.004302 | 0.011405 | 503.5982 | 524.4205 | 466.14   | 676.3345 | 605.3683 | 665.2964 |
| 12019 | SAP30     | 364.4084 | 0.382205 | 0.159037 | 2.403246 | 0.01625  | 0.035944 | 311.1576 | 347.0591 | 289.4243 | 408.4792 | 436.3786 | 393.952  |
| 20190 | FAM47E    | 45.3376  | 0.382198 | 0.3828   | 0.998429 | 0.318072 | 0.418818 | 42.28274 | 37.224   | 37.56949 | 60.26743 | 53.47777 | 41.20416 |
| 22286 | PGBD5     | 20.62457 | 0.382188 | 0.565037 | 0.676395 | 0.49879  | 0.595007 | 22.22554 | 16.96977 | 13.91463 | 29.01765 | 23.53022 | 18.08963 |
| 24042 | LOC119621 | 7.161024 | 0.38218  | 0.95417  | 0.400537 | 0.688761 | 0.761614 | 9.215468 | 3.284471 | 6.261582 | 4.464254 | 10.69555 | 9.044815 |
| 8048  | PEPD      | 2010.286 | 0.38217  | 0.112392 | 3.400327 | 0.000673 | 0.002223 | 1850.683 | 1670.701 | 1721.239 | 2216.502 | 2077.076 | 2525.513 |
| 19058 | LOC103231 | 98.28703 | 0.382012 | 0.324852 | 1.175957 | 0.239612 | 0.334248 | 116.5486 | 69.5213  | 68.87741 | 95.98146 | 143.3204 | 95.47305 |
| 16079 | ZNF527    | 143.9661 | 0.381244 | 0.23082  | 1.651693 | 0.098597 | 0.163021 | 140.4004 | 111.1246 | 124.5359 | 167.4095 | 145.4595 | 174.8664 |
| 12505 | EFR3B     | 275.709  | 0.381088 | 0.16566  | 2.300415 | 0.021425 | 0.045545 | 237.4338 | 238.6716 | 242.1145 | 325.8905 | 301.6146 | 308.5287 |
| 13480 | B3GAT3    | 1276.13  | 0.381064 | 0.180515 | 2.110978 | 0.034774 | 0.068581 | 1352.505 | 778.967  | 1196.658 | 1372.758 | 1369.031 | 1586.863 |
| 7624  | MAPK3     | 1876.702 | 0.380882 | 0.108233 | 3.519075 | 0.000433 | 0.00151  | 1660.953 | 1598.442 | 1637.752 | 2093.735 | 1933.756 | 2335.572 |
| 11685 | PLK3      | 354.7145 | 0.380604 | 0.153777 | 2.475039 | 0.013322 | 0.03031  | 306.8209 | 290.6757 | 327.6895 | 388.3901 | 410.7092 | 404.0017 |
| 23450 | LOC103241 | 11.18423 | 0.380596 | 0.772546 | 0.492652 | 0.622258 | 0.705447 | 8.131296 | 10.40082 | 10.43597 | 6.696381 | 21.39111 | 10.04979 |
| 25467 | LOC119621 | 1.538575 | 0.380558 | 2.245445 | 0.16948  | 0.865419 | 0.90334  | 3.252518 | 0        | 0.695731 | 0        | 4.278221 | 1.004979 |
| 8123  | DVL3      | 1448.032 | 0.380227 | 0.11275  | 3.372315 | 0.000745 | 0.00244  | 1212.647 | 1344.443 | 1220.313 | 1696.417 | 1488.821 | 1725.55  |
| 22160 | TMEM121   | 25.09757 | 0.380146 | 0.544264 | 0.698459 | 0.48489  | 0.581715 | 23.30971 | 13.6853  | 27.82925 | 35.71403 | 29.94755 | 20.09959 |
| 24645 | LOC119621 | 4.367161 | 0.380088 | 1.233441 | 0.308152 | 0.757967 | 0.817632 | 1.626259 | 3.284471 | 6.261582 | 4.464254 | 8.556443 | 2.009959 |
| 14559 | ADI1      | 215.9217 | 0.379619 | 0.198354 | 1.913847 | 0.05564  | 0.101599 | 201.114  | 189.9519 | 173.9328 | 245.534  | 209.6328 | 275.3644 |
| 19285 | CPA5      | 60.25754 | 0.379414 | 0.333252 | 1.13852  | 0.254904 | 0.351393 | 56.91907 | 50.36189 | 49.39693 | 60.26743 | 81.28621 | 63.31371 |
| 6823  | ZZEF1     | 4169.691 | 0.379388 | 0.099595 | 3.809316 | 0.000139 | 0.000543 | 3660.167 | 3635.362 | 3585.799 | 4475.415 | 4436.516 | 5224.888 |
| 21926 | DAPK2     | 30.55887 | 0.379164 | 0.51191  | 0.740683 | 0.458885 | 0.556393 | 29.27266 | 18.612   | 31.30791 | 24.5534  | 53.47777 | 26.12947 |
| 20613 | LOC103241 | 47.81201 | 0.379029 | 0.405447 | 0.934843 | 0.349869 | 0.451234 | 47.7036  | 33.93953 | 41.74388 | 53.57105 | 72.72976 | 37.18424 |
| 9543  | ZNF304    | 937.0042 | 0.37882  | 0.127377 | 2.974002 | 0.002939 | 0.008189 | 779.5202 | 900.4924 | 763.2173 | 1142.849 | 979.7127 | 1056.233 |
| 7929  | GNAI1     | 1856.517 | 0.378671 | 0.110379 | 3.430637 | 0.000602 | 0.002019 | 1534.104 | 1795.511 | 1514.607 | 2051.325 | 2072.798 | 2170.756 |
| 5187  | CLTA      | 6425.354 | 0.378142 | 0.082438 | 4.586978 | 4.50E-06 | 2.30E-05 | 5592.163 | 5447.295 | 5723.782 | 7502.179 | 7106.126 | 7180.578 |
| 20092 | CLEC11A   | 62.8757  | 0.377998 | 0.372791 | 1.013968 | 0.310598 | 0.410972 | 52.04029 | 38.31883 | 73.74753 | 87.05295 | 57.75599 | 68.3386  |
| 16938 | LOC119621 | 108.7352 | 0.377941 | 0.251717 | 1.501455 | 0.133238 | 0.290123 | 86.19173 | 97.4393  | 99.48959 | 133.9276 | 119.7902 | 115.5726 |
| 9124  | IMP3      | 738.2634 | 0.37785  | 0.122896 | 3.074559 | 0.002108 | 0.006143 | 686.8234 | 601.6056 | 637.9857 | 837.0476 | 829.9749 | 836.1429 |
| 10739 | ACYP1     | 452.7724 | 0.377736 | 0.140798 | 2.682828 | 0.0073   | 0.018072 | 415.2382 | 370.0504 | 396.5669 | 513.3892 | 504.8301 | 516.5594 |
| 11751 | COMTD1    | 444.1218 | 0.377615 | 0.153578 | 2.458793 | 0.01394  | 0.031538 | 388.6759 | 353.0806 | 416.7431 | 558.0317 | 457.7697 | 490.43   |
| 7813  | CUNH12or  | 1771.275 | 0.377476 | 0.109013 | 3.462663 | 0.000535 | 0.00182  | 1488.569 | 1678.912 | 1451.296 | 2107.128 | 2004.347 | 1897.401 |
| 10784 | LOC103231 | 491.0156 | 0.377455 | 0.141196 | 2.673274 | 0.007511 | 0.018516 | 427.1641 | 460.9207 | 392.3925 | 571.4245 | 545.4732 | 548.7188 |
| 11320 | MYBL1     | 1142.866 | 0.377369 | 0.147814 | 2.552995 | 0.01068  | 0.025082 | 874.9274 | 1217.991 | 889.8404 | 1238.83  | 1324.11  | 1311.498 |
| 14900 | STARD5    | 203.9773 | 0.377121 | 0.203308 | 1.854919 | 0.063608 | 0.113491 | 195.6932 | 153.8227 | 182.9774 | 209.8199 | 252.4151 | 229.1353 |
| 10099 | SLC41A2   | 734.928  | 0.377098 | 0.132833 | 2.838896 | 0.004527 | 0.011917 | 601.1738 | 711.6354 | 607.3735 | 828.1191 | 782.9145 | 878.3521 |
| 7815  | SLC23A2   | 3821.346 | 0.377027 | 0.108918 | 3.461572 | 0.000537 | 0.001827 | 3227.04  | 3393.406 | 3361.774 | 4205.327 | 3865.373 | 4875.155 |
| 10297 | TBC1D8B   | 1941.537 | 0.376702 | 0.135048 | 2.789389 | 0.005281 | 0.013634 | 1495.616 | 2005.169 | 1570.961 | 2078.11  | 2098.468 | 2400.896 |
| 8760  | NISCH     | 3119.807 | 0.376646 | 0.118238 | 3.185487 | 0.001445 | 0.004386 | 2921.846 | 2393.832 | 2833.714 | 3549.082 | 3172.301 | 3848.066 |
| 22943 | CLEC4A    | 16.25205 | 0.37634  | 0.657298 | 0.572556 | 0.566945 | 0.656943 | 17.88885 | 12.59047 | 11.1317  | 22.32127 | 23.53022 | 10.04979 |
| 13681 | MISP3     | 427.137  | 0.376305 | 0.181584 | 2.072345 | 0.038233 | 0.074295 | 317.1205 | 454.8992 | 341.6041 | 462.0503 | 536.9168 | 450.2308 |
| 7563  | CC2D1B    | 2475.442 | 0.376248 | 0.106369 | 3.537186 | 0.000404 | 0.001421 | 2268.089 | 2062.648 | 2137.983 | 2790.159 | 2547.681 | 3046.093 |
| 5537  | TAGLN2    | 18727.71 | 0.376081 | 0.085536 | 4.396775 | 1.10E-05 | 5.27E-05 | 16889.79 | 15542.12 | 16474.92 | 20819.05 | 20325.83 | 22314.56 |
| 9629  | TMUB1     | 1109.883 | 0.37607  | 0.127331 | 2.953476 | 0.008775 | 0.008675 | 989.3076 | 856.6995 | 1052.642 | 1350.437 | 1152.981 | 1257.229 |
| 12172 | BRF2      | 379.678  | 0.375948 | 0.158541 | 2.371304 | 0.017725 | 0.038711 | 352.8982 | 301.6239 | 339.5169 | 397.3186 | 421.4048 | 465.3055 |
| 10224 | NHLRC3    | 689.4817 | 0.375792 | 0.133793 | 2.808748 | 0.004973 | 0.012932 | 571.9011 | 656.3468 | 571.8912 | 839.2797 | 716.6021 | 780.869  |
| 21758 | LOC119621 | 28.42624 | 0.375217 | 0.488967 | 0.767366 | 0.442864 | 0.541113 | 30.89892 | 25.72836 | 17.39328 | 29.01765 | 36.36488 | 31.15436 |
| 9531  | ATAD2B    | 1676.44  | 0.374931 | 0.125968 | 2.976393 | 0.002917 | 0.008134 | 1334.075 | 1703.546 | 1342.762 | 1890.612 | 1828.94  | 1958.705 |
| 8436  | MAPK12    | 1542.21  | 0.374684 | 0.114499 | 3.272368 | 0.001067 | 0.003361 | 1406.714 | 1284.228 | 1343.457 | 1732.131 | 1572.246 | 1914.486 |
| 16701 | TTL6      | 123.3391 | 0.374216 | 0.242558 | 1.542789 | 0.122882 | 0.19561  | 102.9964 | 121.5254 | 97.40239 | 131.6955 | 149.7377 | 136.6772 |
| 16182 | LOC119621 | 152.5669 | 0.374146 | 0.229574 | 1.629741 | 0.103156 | 0.169473 | 138.232  | 122.0728 | 139.842  | 185.2665 | 139.0422 | 190.9461 |
| 6234  | CD164     | 7750.899 | 0.374048 | 0.092142 | 4.059479 | 4.92E-05 | 0.00021  | 7042.244 | 6296.331 | 6921.831 | 8468.69  | 8509.382 | 9266.916 |
| 18584 | LOC103211 | 82.61229 | 0.373997 | 0.302253 | 1.237362 | 0.215953 | 0.308927 | 77.51835 | 73.35318 | 63.31155 | 93.74933 | 113.3729 | 74.36848 |
| 22417 | MIXL1     | 21.30337 | 0.373845 | 0.571686 | 0.653934 | 0.513154 | 0.608565 | 17.88885 | 20.80165 | 16.00182 | 31.24978 | 27.80844 | 14.06971 |
| 7311  | BPNT1     | 1948.147 | 0.373697 | 0.102906 | 3.631424 | 0.000282 | 0.001025 | 1667.458 | 1819.049 | 1607.835 | 2160.699 | 2128.415 | 2305.423 |
| 18341 | LOC119611 | 92.2987  | 0.373554 | 0.292675 | 1.276346 | 0.201833 | 0.292554 | 76.43418 | 72.25836 | 92.53227 | 82.5887  | 130.4858 | 99.49297 |
| 19924 | TFAP2E    | 73.91952 | 0.373379 | 0.357774 | 1.043616 | 0.296663 | 0.395844 | 79.6867  | 41.05589 | 73.74753 | 73.66019 | 74.86887 | 100.4979 |
| 10757 | NAA80     | 493.1191 | 0.373366 | 0.139409 | 2.678208 | 0.007402 | 0.018292 | 406.0227 | 454.8992 | 429.962  | 553.5675 | 528.3603 | 585.903  |
| 23183 | LOC119621 | 14.09944 | 0.373286 | 0.700932 | 0.532556 | 0.594341 | 0.681558 | 15.17842 | 12.59047 | 8.348776 | 22.32127 | 17.11289 | 9.044815 |
| 9461  | WDR20     | 1056.154 | 0.373278 | 0.124649 | 2.994632 | 0.002748 | 0.007721 | 918.2943 | 1003.406 | 840.4435 | 1241.063 | 1084.529 | 1249.189 |
| 11011 | MVD       | 4096.142 | 0.37324  | 0.142086 | 2.626852 | 0.008618 | 0.020807 | 3940.426 | 2769.356 | 4000.455 | 4738.806 | 4237.578 | 4890.23  |
| 8610  | CEBPZOS   | 1096.317 | 0.373215 | 0.11569  | 3.225996 | 0.001255 | 0.003876 | 917.7522 | 1035.156 | 910.0166 | 1290.169 | 1244.962 | 1179.846 |
| 7094  | MPP5      | 4155.597 | 0.373215 | 0.100884 | 3.699443 | 0.000216 | 0.00081  | 3519.225 | 4003.77  | 3340.902 | 4613.806 | 4661.122 | 4794.757 |
| 8987  | TOB2      | 5841.801 | 0.373151 | 0.1      |          |          |          |          |          |          |          |          |          |



|       |           |          |          |          |          |          |          |          |          |          |          |          |          |
|-------|-----------|----------|----------|----------|----------|----------|----------|----------|----------|----------|----------|----------|----------|
| 6111  | TMEM30A   | 7096.881 | 0.372757 | 0.090603 | 4.114176 | 3.89E-05 | 0.000169 | 6210.141 | 6322.606 | 6029.208 | 7671.82  | 7698.659 | 8648.853 |
| 11439 | S100A13   | 4660.372 | 0.37275  | 0.147429 | 2.528342 | 0.01146  | 0.026634 | 4634.296 | 3033.209 | 4518.775 | 5307.998 | 5078.249 | 5389.705 |
| 24734 | TRNAQ-UL  | 3.44726  | 0.372589 | 1.270591 | 0.293241 | 0.769338 | 0.826912 | 2.710432 | 2.737059 | 3.478657 | 4.464254 | 4.278221 | 3.014938 |
| 6670  | LOC103240 | 5463.459 | 0.372567 | 0.096311 | 3.868361 | 0.00011  | 0.000437 | 5026.767 | 4515.053 | 4749.758 | 6008.886 | 5833.355 | 6646.934 |
| 6687  | TRIO      | 10998.43 | 0.372535 | 0.096446 | 3.862616 | 0.000112 | 0.000446 | 9925.601 | 9707.801 | 9132.17  | 12013.31 | 11581.15 | 13630.54 |
| 16250 | LOC103240 | 171.0068 | 0.372296 | 0.230203 | 1.617249 | 0.105825 | 0.173129 | 149.6158 | 137.4004 | 163.4969 | 162.9453 | 175.4071 | 237.1752 |
| 7698  | LOC103230 | 5986.888 | 0.372289 | 0.106553 | 3.49394  | 0.000476 | 0.001644 | 4935.154 | 5784.501 | 4931.084 | 6627.185 | 6306.098 | 7327.305 |
| 10381 | NAPA      | 2627.607 | 0.372191 | 0.134386 | 2.76957  | 0.005613 | 0.014375 | 2458.904 | 1944.407 | 2474.716 | 2758.909 | 2718.81  | 3409.895 |
| 17018 | LOC119620 | 106.0305 | 0.372134 | 0.249708 | 1.490274 | 0.136152 | 0.212694 | 94.32303 | 91.96518 | 90.44508 | 127.2312 | 117.6511 | 114.5677 |
| 11668 | CCDC28A   | 356.5963 | 0.372021 | 0.150126 | 2.478061 | 0.01321  | 0.030096 | 313.868  | 301.6239 | 317.9492 | 395.0865 | 400.0137 | 411.0366 |
| 12286 | LOC119620 | 684.7978 | 0.37185  | 0.15841  | 2.347386 | 0.018906 | 0.040909 | 613.0997 | 684.8122 | 491.1863 | 720.977  | 862.0616 | 736.65   |
| 9051  | STAT2     | 1852.263 | 0.371833 | 0.1201   | 3.096035 | 0.001961 | 0.005761 | 1737.929 | 1621.981 | 1490.257 | 1988.825 | 1920.921 | 2353.662 |
| 7818  | SLC12A6   | 1351.664 | 0.371765 | 0.107409 | 3.461201 | 0.000538 | 0.001829 | 1188.253 | 1215.254 | 1134.738 | 1542.4   | 1420.369 | 1608.972 |
| 8887  | KIAA2013  | 2780.534 | 0.371679 | 0.118089 | 3.147455 | 0.001647 | 0.004927 | 2529.917 | 2214.828 | 2535.245 | 3028.996 | 2823.626 | 3550.592 |
| 15165 | METTL25   | 189.0605 | 0.371424 | 0.206013 | 1.802918 | 0.071401 | 0.12517  | 179.4306 | 149.9908 | 163.4969 | 212.0521 | 237.4413 | 191.9511 |
| 25442 | TRNAD-GU  | 1.583767 | 0.371226 | 2.137332 | 0.173687 | 0.862112 | 0.900843 | 2.168345 | 0        | 2.087194 | 2.232127 | 0        | 3.014938 |
| 7768  | ATXN1L    | 3719.061 | 0.371223 | 0.106904 | 3.472507 | 0.000516 | 0.001765 | 3061.162 | 3603.065 | 3068.871 | 4151.756 | 3957.355 | 4472.159 |
| 5668  | PRSS23    | 6671.812 | 0.370962 | 0.08548  | 3.439745 | 1.43E-05 | 6.69E-05 | 5843.691 | 6043.974 | 5571.417 | 7432.983 | 7337.15  | 7801.656 |
| 24721 | LOC119620 | 4.408272 | 0.370939 | 1.254996 | 0.29557  | 0.767559 | 0.825434 | 1.084173 | 3.284471 | 6.957314 | 6.696381 | 6.417332 | 2.009959 |
| 8085  | SLC10A3   | 3036.632 | 0.370833 | 0.109504 | 3.386489 | 0.000708 | 0.002328 | 2616.109 | 2648.378 | 2686.915 | 3502.207 | 2990.477 | 3775.708 |
| 21484 | LOC103240 | 34.76889 | 0.370647 | 0.459311 | 0.806964 | 0.419687 | 0.519335 | 28.18849 | 26.27577 | 37.56949 | 24.5534  | 42.78221 | 49.24399 |
| 8613  | ZNF654    | 1327.638 | 0.370552 | 0.114883 | 3.225488 | 0.001258 | 0.003882 | 1169.28  | 1256.858 | 1045.684 | 1549.096 | 1486.682 | 1458.225 |
| 12819 | MEAK7     | 330.0824 | 0.370405 | 0.16576  | 2.234587 | 0.025444 | 0.052765 | 316.5784 | 282.4645 | 266.4651 | 348.2118 | 365.7879 | 400.9868 |
| 22418 | LOC103240 | 19.76946 | 0.370345 | 0.566374 | 0.653887 | 0.513184 | 0.608574 | 14.63633 | 15.32753 | 21.56767 | 22.32127 | 25.66933 | 19.09461 |
| 13078 | SLC12A9   | 1232.617 | 0.370063 | 0.168893 | 2.191108 | 0.028444 | 0.05782  | 1240.836 | 809.6221 | 1179.265 | 1372.758 | 1221.432 | 1571.788 |
| 22320 | IZUMO1    | 25.00016 | 0.370028 | 0.550557 | 0.672097 | 0.501522 | 0.597355 | 22.22554 | 21.34906 | 20.87194 | 24.5534  | 44.92132 | 16.07967 |
| 23954 | LOC119620 | 8.708842 | 0.36974  | 0.892751 | 0.414158 | 0.678759 | 0.75331  | 7.589209 | 6.568942 | 8.348776 | 4.464254 | 19.252   | 6.029877 |
| 7455  | MCM4      | 5423.741 | 0.369558 | 0.103239 | 3.579647 | 0.000344 | 0.001227 | 4689.589 | 4849.521 | 4667.662 | 5767.816 | 5685.756 | 6882.099 |
| 12455 | LPIN3     | 521.7621 | 0.36924  | 0.159858 | 2.309794 | 0.0209   | 0.04461  | 495.4669 | 435.7398 | 439.7022 | 508.925  | 558.3079 | 692.4309 |
| 17035 | SCAND1    | 407.2749 | 0.369156 | 0.248126 | 1.487775 | 0.13681  | 0.213508 | 415.7802 | 205.8268 | 445.9638 | 433.0326 | 455.6306 | 487.415  |
| 11589 | PPP1R9B   | 3566.286 | 0.369132 | 0.147861 | 2.496484 | 0.012543 | 0.028774 | 2682.785 | 3940.818 | 2713.352 | 4247.738 | 3766.974 | 4046.047 |
| 7737  | TP53INP1  | 1943.869 | 0.36906  | 0.106014 | 3.48123  | 0.000499 | 0.001715 | 1664.205 | 1800.985 | 1629.403 | 2075.878 | 2121.998 | 2370.747 |
| 25313 | LOC119620 | 1.862605 | 0.368969 | 1.867257 | 0.197599 | 0.843359 | 0.885738 | 1.084173 | 2.189647 | 1.391463 | 2.232127 | 4.278221 | 0        |
| 16507 | LOC103220 | 345.4025 | 0.368289 | 0.233914 | 1.574465 | 0.11538  | 0.185828 | 356.1507 | 198.7105 | 351.3443 | 412.9435 | 325.1448 | 428.1213 |
| 16802 | LOC103220 | 180.242  | 0.367887 | 0.241271 | 1.52479  | 0.127312 | 0.201439 | 184.8515 | 116.0513 | 171.1499 | 225.4448 | 183.9635 | 199.9909 |
| 7225  | LENG8     | 5667.599 | 0.367597 | 0.100445 | 3.659677 | 0.000253 | 0.000929 | 4612.613 | 5341.097 | 4900.036 | 6191.92  | 6070.796 | 6889.134 |
| 11151 | SBF1      | 5551.538 | 0.367594 | 0.141823 | 2.591921 | 0.009544 | 0.022754 | 5405.685 | 3802.322 | 5339.738 | 6392.812 | 5565.966 | 6802.706 |
| 16427 | TBX19     | 139.5681 | 0.367592 | 0.231943 | 1.584837 | 0.113003 | 0.182881 | 132.2691 | 112.7668 | 121.753  | 133.9276 | 166.8506 | 169.8415 |
| 6923  | TBC1D9    | 3308.467 | 0.367478 | 0.097601 | 3.765108 | 0.000166 | 0.000639 | 2775.482 | 3062.222 | 2835.105 | 3669.617 | 3531.672 | 3976.704 |
| 17095 | ZNF565    | 113.3681 | 0.367438 | 0.24786  | 1.48244  | 0.138223 | 0.214956 | 97.57555 | 105.6505 | 92.53227 | 138.3919 | 130.4858 | 115.5726 |
| 8975  | SPACA6    | 892.1468 | 0.367114 | 0.117524 | 3.123731 | 0.001786 | 0.00529  | 761.6313 | 832.066  | 741.6496 | 1037.939 | 1011.799 | 967.7952 |
| 10503 | STX4      | 532.2833 | 0.367017 | 0.133762 | 2.743818 | 0.006073 | 0.015372 | 458.6051 | 482.8172 | 453.6169 | 562.496  | 633.1768 | 602.9877 |
| 23710 | LOC119620 | 10.03139 | 0.367014 | 0.810912 | 0.452594 | 0.650841 | 0.72977  | 4.878777 | 13.13788 | 8.348776 | 8.928508 | 12.83466 | 12.05975 |
| 12524 | RABGEF1   | 855.8423 | 0.366983 | 0.159777 | 2.296848 | 0.021627 | 0.045909 | 642.3723 | 926.2208 | 672.0765 | 1024.546 | 958.3216 | 911.5164 |
| 23997 | VSNL1     | 8.729009 | 0.36669  | 0.901436 | 0.406784 | 0.684166 | 0.757952 | 7.589209 | 9.853413 | 4.87012  | 8.928508 | 17.11289 | 4.019918 |
| 9471  | CDKL2     | 863.661  | 0.366622 | 0.122524 | 2.992244 | 0.002769 | 0.007774 | 715.554  | 829.8763 | 718.6905 | 968.7431 | 956.1825 | 992.9197 |
| 14358 | SLC2A8    | 336.8717 | 0.366596 | 0.187944 | 1.95056  | 0.051109 | 0.09464  | 325.7939 | 238.1241 | 321.4279 | 337.0512 | 380.7617 | 418.0715 |
| 13980 | SYT3      | 238.1423 | 0.366555 | 0.181879 | 2.015384 | 0.043864 | 0.083415 | 214.1241 | 203.6372 | 207.3279 | 236.6055 | 288.7799 | 278.3793 |
| 24793 | LOC119610 | 5.306255 | 0.366389 | 1.298339 | 0.282199 | 0.777791 | 0.834009 | 4.878777 | 1.094824 | 7.653045 | 2.232127 | 14.97377 | 1.004979 |
| 17644 | GLRA2     | 106.3803 | 0.366373 | 0.261927 | 1.398761 | 0.161885 | 0.243919 | 97.03346 | 99.62895 | 80.70484 | 122.767  | 132.6249 | 105.5228 |
| 10221 | BRPF3     | 1493.349 | 0.366293 | 0.130321 | 2.810701 | 0.004943 | 0.012858 | 1213.189 | 1490.602 | 1214.747 | 1618.292 | 1552.994 | 1870.267 |
| 13955 | SRD5A3    | 259.1146 | 0.366073 | 0.18116  | 2.02071  | 0.04331  | 0.082507 | 247.1914 | 200.9001 | 232.3743 | 276.7837 | 290.9191 | 306.5187 |
| 24908 | LOC119610 | 3.151929 | 0.366062 | 1.390788 | 0.263205 | 0.792393 | 0.845743 | 4.336691 | 1.642235 | 2.087194 | 6.696381 | 2.139111 | 2.009959 |
| 11518 | DCDC2     | 1885.218 | 0.365755 | 0.14576  | 2.509288 | 0.012097 | 0.027922 | 1483.148 | 2045.131 | 1415.118 | 2033.468 | 2113.441 | 2221.005 |
| 13433 | IFI44L    | 483.7628 | 0.365718 | 0.172448 | 2.120745 | 0.033943 | 0.067177 | 362.6558 | 519.4938 | 385.4352 | 533.4783 | 566.8643 | 534.6491 |
| 11328 | HMBOX1    | 1074.229 | 0.365633 | 0.143303 | 2.551459 | 0.010727 | 0.025177 | 828.308  | 1123.836 | 863.4026 | 1158.474 | 1283.466 | 1187.886 |
| 17183 | HOXA4     | 146.7769 | 0.365312 | 0.248488 | 1.470136 | 0.141525 | 0.218963 | 118.1748 | 151.6331 | 113.4042 | 203.1236 | 147.5986 | 146.727  |
| 23804 | LOC119620 | 9.055779 | 0.365267 | 0.837984 | 0.435887 | 0.662919 | 0.740367 | 8.673382 | 8.211177 | 6.957314 | 4.464254 | 14.97377 | 11.05477 |
| 21310 | LOC119620 | 35.54889 | 0.365035 | 0.439104 | 0.831317 | 0.405794 | 0.506243 | 32.52518 | 34.48694 | 27.13352 | 37.94616 | 29.94755 | 51.25395 |
| 7607  | AHSA1     | 2924.176 | 0.364951 | 0.103586 | 3.523179 | 0.000426 | 0.00149  | 2433.426 | 2793.99  | 2442.713 | 3399.529 | 3084.598 | 3390.801 |
| 11159 | IRAK4     | 548.5383 | 0.364896 | 0.140892 | 2.589897 | 0.0096   | 0.022872 | 520.945  | 426.9812 | 490.4906 | 618.2992 | 622.4812 | 612.0325 |
| 7391  | CLPX      | 2645.839 | 0.36466  | 0.101228 | 3.602376 | 0.000315 | 0.001134 | 2137.447 | 2520.831 | 2281.303 | 2959.8   | 2996.894 | 2978.759 |
| 20726 | LOC103220 | 51.17319 | 0.364315 | 0.398433 | 0.91437  | 0.360522 | 0.462438 | 47.16151 | 30.65506 | 56.35424 | 46.87467 | 72.72976 | 53.26391 |
| 21810 | LOC103210 | 40.61783 | 0.364239 | 0.480275 | 0.758397 | 0.448213 | 0.546343 | 26.56223 | 51.45671 | 27.13352 | 55.80317 | 55.61688 | 27.13445 |
| 22185 | LOC119620 | 25.04999 | 0.364224 | 0.524638 | 0.69424  | 0.487532 | 0.584215 | 26.02015 | 20.80165 | 18.08902 | 26.78552 | 38.50399 | 20.09959 |
| 8758  | RAB3D     | 1827.683 | 0.364204 | 0.114325 | 3.185695 | 0.001444 | 0.004383 | 1674.505 | 1546.438 | 1580.006 | 1993.289 | 1867.444 | 2304.418 |
| 10814 | KMT2C     | 4296.032 | 0.36408  | 0.136514 | 2.66699  | 0.007653 | 0.018815 | 3315.4   | 4634.936 | 3321.422 | 4691.931 | 4725.295 | 5087.206 |
| 22319 | LOC119620 | 40.41192 | 0.363972 | 0.541482 | 0.672177 | 0.501471 | 0.597321 | 18.97302 | 66.23683 | 20.87194 | 37.94616 | 49.19955 | 49.24399 |
| 20713 | LOC103240 | 50.77524 | 0.363896 | 0.396603 | 0.917531 | 0.358865 | 0.4606   | 44.99317 | 32.2973  | 54.96278 | 71.42806 | 57.75599 | 43.21412 |
| 23209 | LOC119620 | 15.10894 | 0.363821 | 0.688832 | 0.52817  |          |          |          |          |          |          |          |          |



|       |           |          |          |          |          |          |          |          |          |          |          |          |          |
|-------|-----------|----------|----------|----------|----------|----------|----------|----------|----------|----------|----------|----------|----------|
| 7564  | NDST1     | 3769.814 | 0.363086 | 0.102648 | 3.537188 | 0.000404 | 0.001421 | 3446.585 | 3159.114 | 3294.288 | 4203.095 | 3871.79  | 4644.01  |
| 22834 | LOC119621 | 17.21339 | 0.363046 | 0.617168 | 0.588245 | 0.556368 | 0.64781  | 17.34676 | 14.78012 | 13.2189  | 11.16063 | 25.66933 | 21.10457 |
| 20370 | LOC103221 | 47.35587 | 0.363039 | 0.375798 | 0.966048 | 0.33402  | 0.435932 | 44.99317 | 43.24553 | 36.17803 | 42.41041 | 62.03421 | 55.27387 |
| 24289 | TIMD4     | 6.85677  | 0.363014 | 0.998302 | 0.363631 | 0.716134 | 0.783829 | 7.589209 | 3.831883 | 6.261582 | 4.464254 | 14.97377 | 4.019918 |
| 14308 | RNH1      | 5618.574 | 0.362989 | 0.185224 | 1.959728 | 0.050028 | 0.092954 | 6007.401 | 3254.911 | 5487.233 | 6229.866 | 5525.323 | 7206.708 |
| 7047  | CTDSP1    | 2654.522 | 0.362936 | 0.097737 | 3.713407 | 0.000204 | 0.000771 | 2374.338 | 2244.936 | 2353.659 | 2899.533 | 2840.739 | 3213.924 |
| 9840  | PLCL2     | 712.271  | 0.362886 | 0.125286 | 2.896472 | 0.003774 | 0.010196 | 655.9245 | 621.8598 | 594.1546 | 787.9408 | 761.5234 | 852.2226 |
| 10548 | TNK2      | 2293.747 | 0.362746 | 0.132668 | 2.734249 | 0.006252 | 0.015757 | 2201.413 | 1718.873 | 2105.979 | 2508.911 | 2303.822 | 2923.485 |
| 21267 | SLC9A9    | 41.11272 | 0.362707 | 0.431871 | 0.839852 | 0.400992 | 0.501254 | 35.23561 | 48.71965 | 23.65487 | 44.64254 | 49.19955 | 45.22408 |
| 11681 | PHYKPL    | 479.6985 | 0.362695 | 0.146507 | 2.475608 | 0.013301 | 0.030272 | 452.6421 | 412.7485 | 396.5669 | 502.2286 | 524.0821 | 589.9229 |
| 24909 | LOC103211 | 4.380155 | 0.362296 | 1.37864  | 0.262792 | 0.792711 | 0.846048 | 2.168345 | 5.474118 | 3.478657 | 4.464254 | 10.69555 | 0        |
| 22930 | LOC119621 | 16.12224 | 0.362195 | 0.630563 | 0.574399 | 0.565698 | 0.655869 | 14.09425 | 13.6853  | 14.61036 | 24.5534  | 10.69555 | 19.09461 |
| 10430 | LOC103231 | 1909.661 | 0.362142 | 0.131183 | 2.760581 | 0.00577  | 0.014707 | 1804.606 | 1485.128 | 1730.284 | 2069.182 | 1899.53  | 2469.235 |
| 5976  | STMN1     | 4699.677 | 0.362099 | 0.086745 | 4.174297 | 2.99E-05 | 0.000133 | 4048.301 | 3995.559 | 4292.663 | 5430.765 | 5311.412 | 5119.365 |
| 5954  | TMEM64    | 4442.21  | 0.362055 | 0.086525 | 4.184388 | 2.86E-05 | 0.000128 | 3925.247 | 4034.425 | 3703.378 | 5026.75  | 4928.511 | 5034.947 |
| 13052 | LOC103221 | 336.886  | 0.362023 | 0.164854 | 2.196024 | 0.02809  | 0.057216 | 271.0432 | 303.8136 | 310.2962 | 339.2833 | 414.9875 | 381.8922 |
| 19961 | STMN4     | 57.18195 | 0.362019 | 0.349442 | 1.035992 | 0.300206 | 0.399815 | 40.65648 | 58.57306 | 50.78839 | 58.0353  | 72.72976 | 62.30873 |
| 22079 | LOC119621 | 28.93011 | 0.361991 | 0.507981 | 0.712608 | 0.476088 | 0.573251 | 16.80468 | 33.39212 | 25.04633 | 35.71403 | 38.50399 | 24.11951 |
| 23067 | LOC103221 | 19.75683 | 0.361672 | 0.656321 | 0.551059 | 0.581593 | 0.670264 | 13.55216 | 21.34906 | 16.00182 | 20.08914 | 38.50399 | 9.044815 |
| 8333  | FBXO31    | 2057.847 | 0.361597 | 0.109482 | 3.302792 | 0.000957 | 0.003054 | 1790.511 | 1802.627 | 1817.25  | 2283.466 | 2083.494 | 2569.733 |
| 19301 | LOC103211 | 69.30938 | 0.361576 | 0.318424 | 1.13552  | 0.256158 | 0.352844 | 65.59245 | 57.47824 | 57.7457  | 95.98146 | 72.72976 | 66.32864 |
| 19225 | MPZ       | 80.09283 | 0.361399 | 0.314256 | 1.150017 | 0.250137 | 0.345898 | 61.25576 | 88.1333  | 61.92009 | 75.89232 | 89.84265 | 103.5129 |
| 22759 | LOC103211 | 16.63924 | 0.361323 | 0.60247  | 0.599736 | 0.548682 | 0.64092  | 15.17842 | 15.32753 | 13.2189  | 15.62489 | 21.39111 | 19.09461 |
| 10109 | ABI1      | 3687.648 | 0.361293 | 0.127353 | 2.83693  | 0.004555 | 0.011979 | 2843.243 | 3877.318 | 2963.12  | 4111.578 | 4250.413 | 4080.217 |
| 9754  | HSPA4L    | 4846.401 | 0.361161 | 0.123867 | 2.915718 | 0.003549 | 0.009672 | 3792.436 | 5073.413 | 3863.396 | 5334.783 | 5439.758 | 5574.621 |
| 8168  | GAK       | 2768.21  | 0.361103 | 0.107522 | 3.358407 | 0.000784 | 0.002552 | 2422.584 | 2448.026 | 2405.143 | 3209.799 | 2735.923 | 3387.786 |
| 6865  | ANKZF1    | 5070.082 | 0.360939 | 0.095219 | 3.790617 | 0.00015  | 0.000582 | 4619.66  | 4395.169 | 4308.664 | 5573.621 | 5347.777 | 6175.599 |
| 24388 | CYP2C9    | 6.29813  | 0.360384 | 1.03469  | 0.348302 | 0.727614 | 0.793161 | 5.420864 | 4.379295 | 6.261582 | 11.16063 | 8.556443 | 2.009959 |
| 20491 | LOC119621 | 52.27237 | 0.360012 | 0.379622 | 0.948342 | 0.342955 | 0.44495  | 42.82482 | 56.38342 | 36.87376 | 71.42806 | 59.8951  | 46.22906 |
| 8510  | LOC103231 | 1299.451 | 0.35987  | 0.110588 | 3.254137 | 0.001137 | 0.003553 | 1227.284 | 1066.358 | 1122.91  | 1412.936 | 1456.734 | 1510.484 |
| 18392 | CUNH15or  | 113.2519 | 0.359718 | 0.284112 | 1.266115 | 0.205472 | 0.297003 | 72.09749 | 124.2625 | 101.5768 | 118.3027 | 132.6249 | 130.6473 |
| 9822  | RCCD1     | 843.9574 | 0.359657 | 0.124012 | 2.900177 | 0.00373  | 0.010095 | 800.6616 | 678.2432 | 740.9539 | 933.0291 | 921.9567 | 988.8998 |
| 11992 | FOXp2     | 681.5556 | 0.359604 | 0.149334 | 2.408051 | 0.016038 | 0.035554 | 544.7968 | 703.4242 | 544.0619 | 772.3159 | 718.7412 | 805.9935 |
| 13087 | CEP162    | 679.3358 | 0.359388 | 0.164099 | 2.190067 | 0.028519 | 0.057938 | 539.3759 | 736.2689 | 510.6668 | 749.9947 | 733.715  | 805.9935 |
| 9456  | INPP5F    | 2366     | 0.359261 | 0.119916 | 2.995954 | 0.002736 | 0.007692 | 1949.885 | 2405.328 | 1863.864 | 2660.695 | 2594.741 | 2721.484 |
| 8080  | SH3GL1    | 2530.637 | 0.359181 | 0.10601  | 3.388173 | 0.000704 | 0.002315 | 2210.628 | 2138.191 | 2308.437 | 2883.908 | 2558.376 | 3084.282 |
| 11981 | TMED1     | 986.8281 | 0.359117 | 0.149054 | 2.409307 | 0.015983 | 0.035465 | 989.8497 | 692.4759 | 912.1038 | 1142.849 | 1063.138 | 1120.552 |
| 18904 | GPX6      | 71.16101 | 0.359089 | 0.29835  | 1.203585 | 0.22875  | 0.321695 | 62.33993 | 63.49977 | 61.22436 | 80.35657 | 79.14709 | 80.39836 |
| 18169 | GATA6     | 133.7685 | 0.359019 | 0.27423  | 1.30919  | 0.19047  | 0.278697 | 102.9964 | 153.2753 | 95.3152  | 124.9991 | 173.268  | 152.7569 |
| 14406 | PLA2G4C   | 220.0471 | 0.358599 | 0.184634 | 1.942213 | 0.052111 | 0.096167 | 193.5248 | 187.2148 | 197.5877 | 267.8552 | 228.8848 | 245.215  |
| 17906 | LOC103231 | 116.5551 | 0.358589 | 0.263604 | 1.360336 | 0.173724 | 0.257923 | 100.8281 | 104.0082 | 100.1853 | 169.6417 | 109.0946 | 115.5726 |
| 23362 | LOC103211 | 11.95881 | 0.358523 | 0.710395 | 0.504681 | 0.613783 | 0.69843  | 10.84173 | 12.04306 | 8.348776 | 15.62489 | 12.83466 | 12.05975 |
| 5843  | FTL       | 205395.4 | 0.35851  | 0.084302 | 4.252669 | 2.11E-05 | 9.61E-05 | 179990   | 188873.5 | 171156.9 | 228851.1 | 221733.8 | 241766.9 |
| 10439 | NAGK      | 1141.266 | 0.358316 | 0.129955 | 2.757227 | 0.005829 | 0.014847 | 1027.254 | 1007.238 | 972.6325 | 1227.67  | 1129.45  | 1483.35  |
| 10638 | ING4      | 630.5009 | 0.358194 | 0.132225 | 2.708971 | 0.006749 | 0.016867 | 571.9011 | 515.1145 | 571.1955 | 756.691  | 654.5679 | 713.5354 |
| 12089 | LZTFL1    | 682.6896 | 0.358067 | 0.149869 | 2.389202 | 0.016885 | 0.037131 | 567.0223 | 690.8337 | 533.626  | 832.5834 | 778.6363 | 693.4358 |
| 13075 | LOC103231 | 914.2676 | 0.35803  | 0.16334  | 2.19194  | 0.028384 | 0.057712 | 885.7691 | 603.7952 | 914.8868 | 1044.635 | 1022.495 | 1014.024 |
| 7394  | SELENOS   | 1486.32  | 0.357889 | 0.099374 | 3.601429 | 0.000316 | 0.001138 | 1337.869 | 1312.694 | 1258.578 | 1685.256 | 1632.141 | 1691.38  |
| 8833  | INAVA     | 3011.779 | 0.357453 | 0.113041 | 3.162148 | 0.001566 | 0.004713 | 2835.112 | 2450.215 | 2643.083 | 3220.959 | 3129.519 | 3791.788 |
| 7727  | SHOCA16   | 13157.95 | 0.35724  | 0.102546 | 3.483717 | 0.000495 | 0.001701 | 12134.06 | 10331.85 | 12150.95 | 14631.59 | 13833.63 | 15865.61 |
| 10219 | CHIC1     | 1039.18  | 0.357087 | 0.127022 | 2.811223 | 0.004935 | 0.012839 | 874.9274 | 1018.733 | 842.5307 | 1080.349 | 1174.372 | 1244.165 |
| 26591 | TRNAN-GL  | 0.399407 | 0.356982 | 4.013031 | 0.088956 | 0.929117 | NA       | 0        | 0        | 1.391463 | 0        | 0        | 1.004979 |
| 27138 | LOC103231 | 0.399407 | 0.356982 | 4.013031 | 0.088956 | 0.929117 | NA       | 0        | 0        | 1.391463 | 0        | 0        | 1.004979 |
| 27658 | TRNAT-CG  | 0.399407 | 0.356982 | 4.013031 | 0.088956 | 0.929117 | NA       | 0        | 0        | 1.391463 | 0        | 0        | 1.004979 |
| 28539 | SGS1L2    | 0.399407 | 0.356982 | 4.013031 | 0.088956 | 0.929117 | NA       | 0        | 0        | 1.391463 | 0        | 0        | 1.004979 |
| 28633 | LOC119621 | 0.399407 | 0.356982 | 4.013031 | 0.088956 | 0.929117 | NA       | 0        | 0        | 1.391463 | 0        | 0        | 1.004979 |
| 28708 | LOC119621 | 0.399407 | 0.356982 | 4.013031 | 0.088956 | 0.929117 | NA       | 0        | 0        | 1.391463 | 0        | 0        | 1.004979 |
| 29079 | LOC119621 | 0.399407 | 0.356982 | 4.013031 | 0.088956 | 0.929117 | NA       | 0        | 0        | 1.391463 | 0        | 0        | 1.004979 |
| 29514 | LOC119621 | 0.399407 | 0.356982 | 4.013031 | 0.088956 | 0.929117 | NA       | 0        | 0        | 1.391463 | 0        | 0        | 1.004979 |
| 16323 | LOC119621 | 220.3981 | 0.356596 | 0.222742 | 1.600937 | 0.109391 | 0.178163 | 219.0029 | 167.508  | 195.5005 | 267.8552 | 186.1026 | 286.4191 |
| 10725 | USP35     | 1129.646 | 0.356165 | 0.132609 | 2.685829 | 0.007235 | 0.017934 | 1067.368 | 902.6821 | 1008.115 | 1232.134 | 1129.45  | 1438.126 |
| 9847  | ELOVL6    | 2532.424 | 0.356003 | 0.122978 | 2.894857 | 0.003793 | 0.010241 | 2003.551 | 2606.775 | 2053.799 | 2752.213 | 2939.138 | 2839.067 |
| 25227 | LOC119621 | 2.489279 | 0.355941 | 1.69105  | 0.210485 | 0.833289 | 0.878122 | 3.252518 | 1.642235 | 1.391463 | 2.232127 | 6.417332 | 0        |
| 13674 | ZNF786    | 284.2155 | 0.355663 | 0.171516 | 2.073641 | 0.038113 | 0.074099 | 234.1813 | 275.8956 | 238.6359 | 312.4978 | 314.4493 | 329.6333 |
| 16351 | DNAJC28   | 178.6764 | 0.355632 | 0.22285  | 1.595839 | 0.110525 | 0.179701 | 135.5216 | 189.9519 | 144.0164 | 203.1236 | 207.4937 | 191.9511 |
| 11741 | LOC119611 | 3622.118 | 0.355543 | 0.144516 | 2.460236 | 0.013885 | 0.031439 | 2758.678 | 4008.697 | 2764.836 | 4153.988 | 4122.066 | 3924.445 |
| 9167  | SYVN1     | 1011.507 | 0.355535 | 0.116095 | 3.06246  | 0.002195 | 0.006366 | 845.6547 | 960.1603 | 858.5325 | 1109.367 | 1114.477 | 1180.851 |
| 10995 | CAMKK2    | 671.1124 | 0.355386 | 0.135119 | 2.630164 | 0.008534 | 0.020634 | 597.3792 | 638.2822 | 532.2345 | 698.6557 | 772.219  | 787.9039 |
| 11361 | MFSD13A   | 642.7404 | 0.355309 | 0.139567 | 2.545794 | 0.010903 | 0.025513 | 616.8943 | 503.0715 | 574.6741 | 680.7987 | 710.1847 | 770.8193 |
| 18297 | CUNH22or  | 99.30397 | 0.355278 | 0.276629 | 1.284312 | 0.199033 | 0.289189 | 84.56547 | 104.0082 | 72.35606 | 120.5349 | 104.8164 | 109.5428 |
| 6974  | LOC103241 | 2244.551 | 0.355189 | 0.094825 | 3.745745 | 0.00018  | 0.000686 | 1925.491 | 2054.984 | 1931.35  | 2477.661 | 2457.838 | 2619.    |



|       |           |          |          |          |          |          |          |          |          |          |          |          |          |
|-------|-----------|----------|----------|----------|----------|----------|----------|----------|----------|----------|----------|----------|----------|
| 12163 | LOC103221 | 2503.502 | 0.354815 | 0.149514 | 2.373119 | 0.017639 | 0.038547 | 2516.907 | 1751.17  | 2328.613 | 2640.606 | 2547.681 | 3236.034 |
| 12075 | AGRN      | 11416.84 | 0.354584 | 0.148197 | 2.392653 | 0.016727 | 0.036824 | 11147.46 | 7780.364 | 11139.35 | 12959.73 | 11001.45 | 14472.71 |
| 12820 | PIM2      | 317.8821 | 0.354482 | 0.158633 | 2.234608 | 0.025443 | 0.052765 | 275.922  | 276.9904 | 285.9456 | 350.4439 | 340.1186 | 377.8723 |
| 18324 | FBXL15    | 102.9172 | 0.354439 | 0.27711  | 1.279055 | 0.200878 | 0.291425 | 86.19173 | 81.01695 | 105.7512 | 111.6063 | 96.25998 | 136.6772 |
| 20774 | FAM177B   | 52.30827 | 0.354331 | 0.390491 | 0.9074   | 0.364195 | 0.466069 | 59.6295  | 30.65506 | 47.30973 | 55.80317 | 64.17332 | 56.27885 |
| 9893  | DCTN1     | 7131.584 | 0.354269 | 0.122751 | 2.88607  | 0.003901 | 0.010483 | 5774.846 | 7411.409 | 5596.463 | 8111.549 | 7448.383 | 8446.852 |
| 9485  | GSTT2B    | 961.9222 | 0.354082 | 0.118497 | 2.988103 | 0.002807 | 0.007868 | 884.1429 | 841.372  | 811.9185 | 1031.243 | 1031.051 | 1171.806 |
| 21128 | LOC119621 | 43.73632 | 0.353952 | 0.411109 | 0.860969 | 0.389255 | 0.489793 | 37.94605 | 38.31883 | 37.56949 | 49.10679 | 66.31243 | 33.16432 |
| 22639 | LOC103231 | 20.73928 | 0.353704 | 0.572969 | 0.617318 | 0.537025 | 0.630625 | 15.17842 | 17.51718 | 21.56767 | 17.85702 | 34.22577 | 18.08963 |
| 12840 | LOC103221 | 306.5397 | 0.353687 | 0.158549 | 2.23078  | 0.025696 | 0.053202 | 274.2957 | 269.3266 | 264.3779 | 341.5154 | 337.9795 | 351.7428 |
| 11180 | FOXO1     | 1509.41  | 0.35367  | 0.136799 | 2.585329 | 0.009729 | 0.023134 | 1201.263 | 1572.714 | 1204.311 | 1683.024 | 1570.107 | 1825.043 |
| 10711 | RERE      | 1274.339 | 0.353605 | 0.131488 | 2.689266 | 0.007161 | 0.017774 | 1001.776 | 1301.745 | 1054.033 | 1345.973 | 1480.265 | 1462.245 |
| 22620 | CAGE1     | 20.42397 | 0.353242 | 0.568045 | 0.621855 | 0.534037 | 0.627647 | 21.68345 | 14.78012 | 17.39328 | 15.62489 | 29.94755 | 23.11453 |
| 16047 | LOC119621 | 577.8741 | 0.35304  | 0.213018 | 1.657327 | 0.097453 | 0.161451 | 380.0025 | 711.0879 | 431.3534 | 638.3883 | 648.1505 | 658.2616 |
| 8124  | TMED5     | 3307.367 | 0.353033 | 0.104687 | 3.37227  | 0.000746 | 0.00244  | 2734.826 | 3231.919 | 2746.052 | 3859.348 | 3595.845 | 3676.215 |
| 19198 | VSIG8     | 70.07904 | 0.353022 | 0.306017 | 1.153602 | 0.248663 | 0.344344 | 59.08741 | 66.78424 | 58.44144 | 87.05295 | 72.72976 | 76.37844 |
| 24293 | LOC103241 | 6.336998 | 0.352803 | 0.971656 | 0.363095 | 0.716534 | 0.784138 | 6.505036 | 4.926706 | 5.565851 | 6.696381 | 4.278221 | 10.04979 |
| 23228 | LOC103241 | 23.5924  | 0.352783 | 0.672067 | 0.524923 | 0.599637 | 0.686248 | 8.131296 | 30.65506 | 22.95914 | 46.87467 | 12.83466 | 20.09959 |
| 12805 | AGPAT2    | 1103.468 | 0.352573 | 0.157562 | 2.237675 | 0.025242 | 0.052407 | 1091.762 | 768.0188 | 1051.946 | 1214.277 | 1105.92  | 1388.882 |
| 12004 | PIAS1     | 2203.095 | 0.352154 | 0.146413 | 2.405203 | 0.016163 | 0.035797 | 1715.703 | 2421.75  | 1668.364 | 2573.642 | 2365.856 | 2473.254 |
| 23429 | LOC103231 | 12.32428 | 0.351708 | 0.709983 | 0.495374 | 0.620336 | 0.703898 | 10.84173 | 13.13788 | 8.348776 | 17.85702 | 10.69555 | 13.06473 |
| 11731 | PIGQ      | 873.732  | 0.351576 | 0.142719 | 2.46341  | 0.013762 | 0.031188 | 803.9141 | 699.5923 | 805.6569 | 941.9576 | 855.6443 | 1135.627 |
| 21339 | TMEM220   | 48.09746 | 0.351425 | 0.425481 | 0.825946 | 0.408834 | 0.509346 | 39.5723  | 49.81448 | 36.17803 | 42.41041 | 83.42532 | 37.18424 |
| 14724 | LOC103241 | 237.5716 | 0.351227 | 0.186368 | 1.88459  | 0.059485 | 0.107402 | 185.9356 | 217.3225 | 224.0255 | 276.7837 | 225.9977 | 275.3644 |
| 25311 | IGFBP1    | 3.204257 | 0.351079 | 1.776054 | 0.197674 | 0.8433   | 0.885738 | 5.420864 | 2.737059 | 0        | 8.928508 | 2.139111 | 0        |
| 24840 | LOC103211 | 3.77607  | 0.350882 | 1.276259 | 0.27493  | 0.78337  | 0.838402 | 3.252518 | 1.642235 | 4.87012  | 4.464254 | 6.417332 | 2.009959 |
| 12152 | HS1BP3    | 1349.226 | 0.350867 | 0.147728 | 2.375093 | 0.017545 | 0.038382 | 1323.233 | 977.6775 | 1262.057 | 1372.758 | 1431.065 | 1728.565 |
| 7663  | MYO5A     | 7429.807 | 0.350864 | 0.100116 | 3.504555 | 0.000457 | 0.001587 | 6332.111 | 7132.776 | 6132.176 | 7964.229 | 8060.169 | 8957.382 |
| 10025 | IGFBP2    | 3568.502 | 0.350411 | 0.122713 | 2.855533 | 0.004296 | 0.011394 | 3434.117 | 2685.602 | 3297.071 | 3915.151 | 3679.27  | 4399.8   |
| 25098 | LOC119621 | 2.844644 | 0.350322 | 1.520294 | 0.23043  | 0.817758 | 0.866208 | 3.794605 | 2.737059 | 0.695731 | 6.696381 | 2.139111 | 1.004979 |
| 10598 | PRKACA    | 1130.768 | 0.350298 | 0.12866  | 2.72266  | 0.006476 | 0.016245 | 885.7691 | 1122.742 | 976.8068 | 1218.741 | 1227.85  | 1352.702 |
| 12135 | ACP2      | 1311.049 | 0.350109 | 0.14718  | 2.378788 | 0.01737  | 0.03805  | 1270.65  | 978.2249 | 1214.747 | 1426.329 | 1274.91  | 1701.43  |
| 13615 | LOC119621 | 872.4282 | 0.350087 | 0.167785 | 2.086523 | 0.036931 | 0.072113 | 961.6612 | 622.9546 | 715.9076 | 915.1721 | 1063.138 | 955.7355 |
| 9624  | SPPL3     | 1289.834 | 0.350072 | 0.118494 | 2.954343 | 0.003133 | 0.008655 | 1177.954 | 1200.474 | 1026.9   | 1419.633 | 1358.335 | 1555.708 |
| 21634 | LOC103221 | 36.51564 | 0.350016 | 0.446302 | 0.784259 | 0.432888 | 0.531932 | 37.94605 | 26.82318 | 30.61218 | 37.94616 | 55.61688 | 30.14938 |
| 20162 | LOC119611 | 53.59222 | 0.349956 | 0.349363 | 1.001696 | 0.31649  | 0.417323 | 45.53526 | 50.36189 | 45.91827 | 49.10679 | 66.31243 | 64.31869 |
| 16252 | CUNH9orf1 | 1186.694 | 0.349919 | 0.216462 | 1.616539 | 0.105978 | 0.173359 | 1265.23  | 628.4288 | 1238.402 | 1392.847 | 1155.12  | 1440.136 |
| 20020 | TMED6     | 72.61002 | 0.349864 | 0.341367 | 1.024891 | 0.305415 | 0.405567 | 73.72375 | 61.85754 | 55.65851 | 55.80317 | 111.2338 | 77.38342 |
| 13446 | TREX1     | 500.0721 | 0.34985  | 0.165185 | 2.117922 | 0.034182 | 0.06758  | 471.0731 | 363.4814 | 487.7077 | 540.1747 | 521.943  | 616.0524 |
| 8027  | PKM       | 34304.46 | 0.349824 | 0.102769 | 3.403979 | 0.000664 | 0.0022   | 32200.47 | 27710.36 | 30692.89 | 37018.48 | 35355.22 | 42249.34 |
| 17851 | LOC103231 | 230.6543 | 0.34961  | 0.255397 | 1.368892 | 0.171033 | 0.254701 | 241.2284 | 130.284  | 235.8529 | 270.0874 | 282.3626 | 224.1104 |
| 6631  | UBR2      | 5837.084 | 0.349585 | 0.089934 | 3.887113 | 0.000101 | 0.000407 | 5181.262 | 5338.907 | 4884.034 | 6403.972 | 6306.098 | 6908.229 |
| 15171 | PRR5      | 602.8501 | 0.349368 | 0.193895 | 1.801843 | 0.07157  | 0.125415 | 611.4734 | 394.1365 | 587.893  | 700.8879 | 551.8906 | 770.8193 |
| 20149 | TDRD12    | 63.36552 | 0.349358 | 0.347995 | 1.003917 | 0.315419 | 0.41617  | 54.20864 | 58.02565 | 53.57132 | 98.21359 | 59.8951  | 56.27885 |
| 9455  | MAP4K2    | 877.3278 | 0.349324 | 0.116592 | 2.996109 | 0.002734 | 0.007689 | 780.6044 | 776.23   | 760.4344 | 1004.457 | 909.122  | 1033.119 |
| 23728 | LOC119621 | 12.04829 | 0.349298 | 0.777225 | 0.449417 | 0.653131 | 0.731741 | 5.96295  | 8.758589 | 16.69755 | 17.85702 | 14.97377 | 8.039836 |
| 14411 | LOC103231 | 319.396  | 0.349287 | 0.179908 | 1.941472 | 0.052201 | 0.096299 | 272.6694 | 316.404  | 251.159  | 345.9797 | 408.5701 | 321.5934 |
| 10187 | GPSM3     | 755.4002 | 0.34907  | 0.123852 | 2.818439 | 0.004826 | 0.012594 | 636.9515 | 712.7302 | 642.8558 | 814.7263 | 892.0091 | 833.128  |
| 7770  | ADAM10    | 9634.701 | 0.348972 | 0.100517 | 3.471792 | 0.000517 | 0.001769 | 8058.114 | 9298.884 | 8073.267 | 10461.98 | 10276.29 | 11639.67 |
| 12281 | ZSCAN30   | 387.8671 | 0.348706 | 0.148432 | 2.349266 | 0.01881  | 0.040721 | 350.1878 | 326.2574 | 346.4742 | 462.0503 | 417.1266 | 425.1063 |
| 9023  | CENPB     | 2820.279 | 0.348619 | 0.112137 | 3.108879 | 0.001878 | 0.005533 | 2579.789 | 2289.276 | 2581.163 | 3073.639 | 2881.382 | 3516.423 |
| 12868 | GCC2      | 3839.88  | 0.348606 | 0.156668 | 2.225132 | 0.026072 | 0.053865 | 2887.694 | 4413.781 | 2831.627 | 4412.915 | 4297.473 | 4195.789 |
| 10706 | REEP4     | 871.7625 | 0.348068 | 0.129393 | 2.690002 | 0.007145 | 0.017743 | 829.9342 | 703.9716 | 771.5661 | 928.5648 | 926.2349 | 1070.303 |
| 8134  | FGD6      | 5207.95  | 0.347886 | 0.103255 | 3.369183 | 0.000754 | 0.002464 | 4412.583 | 5101.878 | 4236.308 | 5544.603 | 5927.476 | 6024.852 |
| 14055 | BLOC1S3   | 301.7496 | 0.347647 | 0.173486 | 2.003896 | 0.045081 | 0.085271 | 243.3968 | 295.6024 | 257.4206 | 312.4978 | 367.927  | 323.6532 |
| 25513 | LOC119621 | 1.275596 | 0.347646 | 2.138979 | 0.162529 | 0.87089  | 0.907376 | 2.168345 | 0.547412 | 0.695731 | 2.232127 | 0        | 2.009959 |
| 25515 | LOC119611 | 1.275596 | 0.347646 | 2.138979 | 0.162529 | 0.87089  | 0.907376 | 2.168345 | 0.547412 | 0.695731 | 2.232127 | 0        | 2.009959 |
| 13617 | GET4      | 1940.12  | 0.347504 | 0.166593 | 2.085948 | 0.036983 | 0.072204 | 2003.551 | 1252.478 | 1869.43  | 2220.966 | 1914.504 | 2379.791 |
| 21447 | LOC103231 | 37.62829 | 0.347293 | 0.427746 | 0.811916 | 0.41684  | 0.516701 | 28.18849 | 40.50847 | 29.91645 | 51.33892 | 40.6431  | 35.17428 |
| 8933  | ACSS3     | 1731.651 | 0.347222 | 0.110712 | 3.136248 | 0.001711 | 0.005092 | 1556.33  | 1614.317 | 1406.073 | 1872.755 | 1846.053 | 2094.377 |
| 11669 | PTGDS     | 689.9486 | 0.347071 | 0.140055 | 2.478105 | 0.013208 | 0.030096 | 636.4094 | 571.4979 | 619.2009 | 743.2983 | 690.9327 | 878.3521 |
| 23039 | LOC103211 | 18.0135  | 0.346946 | 0.624025 | 0.555981 | 0.578224 | 0.66722  | 14.63633 | 21.89647 | 10.43597 | 26.78552 | 19.252   | 15.07469 |
| 12577 | SEC24B    | 2776.769 | 0.346581 | 0.151436 | 2.288636 | 0.022101 | 0.046716 | 2088.659 | 3112.036 | 2133.808 | 2908.461 | 3260.005 | 3157.645 |
| 21166 | SPATA17   | 45.47574 | 0.346523 | 0.405036 | 0.855537 | 0.392254 | 0.492681 | 28.73058 | 52.55153 | 38.96096 | 46.87467 | 53.47777 | 52.25893 |
| 21285 | LOC103231 | 46.32362 | 0.346153 | 0.413337 | 0.837458 | 0.402335 | 0.502517 | 37.94605 | 38.86624 | 44.52681 | 42.41041 | 77.00798 | 37.18424 |
| 8079  | SLC39A7   | 3101.259 | 0.346141 | 0.102128 | 3.38929  | 0.000701 | 0.002306 | 2680.617 | 2947.265 | 2568.64  | 3455.333 | 3266.422 | 3689.28  |
| 8672  | SEC23B    | 3081.126 | 0.346062 | 0.107779 | 3.210842 | 0.001323 | 0.004057 | 2675.196 | 2881.576 | 2588.816 | 3428.547 | 3118.823 | 3793.797 |
| 9968  | RAB10     | 11113.43 | 0.345918 | 0.120497 | 2.87076  | 0.004095 | 0.010921 | 8824.624 | 11706.4  | 8830.918 | 12424.02 | 12355.5  | 12539.13 |
| 15781 | ZSWIM3    | 249.8735 | 0.345797 | 0.20282  | 1.704942 | 0.088205 | 0.148583 | 236.3497 | 194.3312 | 233.07   | 263.391  | 237.4413 | 334.6582 |
| 22386 | LOC119621 | 28.06319 | 0.345672 | 0.523238 | 0.660641 | 0.508843 | 0.604288 | 23.      |          |          |          |          |          |



|       |           |          |          |            |          |          |          |          |          |          |          |          |          |
|-------|-----------|----------|----------|------------|----------|----------|----------|----------|----------|----------|----------|----------|----------|
| 5324  | CMTM6     | 12052.71 | 0.344518 | 0.076435   | 4.507358 | 6.56E-06 | 3.28E-05 | 10726.26 | 10656.47 | 10479.11 | 13319.1  | 13564.1  | 13571.24 |
| 8332  | AGO2      | 6625.912 | 0.344392 | 0.104243   | 3.303755 | 0.000954 | 0.003044 | 5692.991 | 6124.991 | 5704.997 | 7408.429 | 6618.408 | 8205.657 |
| 20048 | LOC119621 | 110.7024 | 0.344326 | 0.337321   | 1.020766 | 0.307365 | 0.407587 | 70.47123 | 99.08154 | 121.0573 | 127.2312 | 168.9897 | 77.38342 |
| 22172 | PPP1R1A   | 28.63725 | 0.344309 | 0.494951   | 0.695642 | 0.486653 | 0.583514 | 30.35684 | 25.72836 | 19.48048 | 22.32127 | 42.78221 | 31.15436 |
| 15818 | ADAMTS1   | 336.0179 | 0.344223 | 0.202847   | 1.696955 | 0.089705 | 0.150766 | 350.7299 | 231.5552 | 308.9047 | 328.1227 | 363.6488 | 433.1462 |
| 13055 | WHAMM     | 555.0276 | 0.344199 | 0.156778   | 2.195452 | 0.028131 | 0.057282 | 445.0529 | 570.9505 | 453.6169 | 564.7281 | 622.4812 | 673.3362 |
| 22455 | LOC119621 | 77.10123 | 0.344133 | 0.530306   | 0.648933 | 0.516382 | 0.611371 | 24.39389 | 140.6848 | 38.96096 | 66.96381 | 94.12087 | 97.48301 |
| 22980 | LOC119621 | 21.23602 | 0.343815 | 0.605673   | 0.567658 | 0.570267 | 0.659728 | 28.73058 | 10.94824 | 16.00182 | 31.24978 | 21.39111 | 19.09461 |
| 11713 | MAGI1     | 1327.71  | 0.343799 | 0.139243   | 2.469059 | 0.013547 | 0.030747 | 1041.348 | 1395.353 | 1075.601 | 1504.454 | 1379.726 | 1569.778 |
| 22698 | LOC119621 | 20.47099 | 0.343663 | 0.56484    | 0.608426 | 0.542905 | 0.635821 | 18.43094 | 21.34906 | 13.91463 | 20.08914 | 29.94755 | 19.09461 |
| 8476  | PDPK1     | 4703.692 | 0.343609 | 0.10537    | 3.260967 | 0.00111  | 0.003483 | 4109.015 | 4448.268 | 3887.051 | 5127.196 | 4857.92  | 5792.702 |
| 12945 | RELB      | 650.7279 | 0.3436   | 0.155169   | 2.214365 | 0.026804 | 0.055046 | 623.3993 | 478.4379 | 621.9838 | 729.9055 | 656.707  | 793.9338 |
| 16711 | FOXO2     | 138.3759 | 0.343504 | 0.22299    | 1.540446 | 0.123452 | 0.196395 | 122.5115 | 122.0728 | 121.753  | 162.9453 | 141.1813 | 159.7917 |
| 25716 | TRNAC-GC  | 1.287904 | 0.343393 | 2.58564    | 0.132808 | 0.894346 | 0.92458  | 2.168345 | 1.094824 | 0        | 4.464254 | 0        | 0        |
| 9428  | ABHD11    | 2509.399 | 0.343342 | 0.114401   | 3.001225 | 0.002689 | 0.007582 | 2396.564 | 1921.963 | 2320.96  | 2767.837 | 2714.531 | 2934.54  |
| 23999 | LOC103231 | 9.192317 | 0.343333 | 0.844487   | 0.406558 | 0.684333 | 0.758073 | 9.215468 | 4.379295 | 10.43597 | 13.39276 | 10.69555 | 7.034856 |
| 24411 | LOC103216 | 7.663246 | 0.343274 | 0.994673   | 0.345113 | 0.73001  | 0.79499  | 9.757555 | 6.02153  | 4.174388 | 17.85702 | 2.139111 | 6.029877 |
| 8618  | AFG3L2    | 5654.891 | 0.342941 | 0.106352   | 3.224662 | 0.001261 | 0.003891 | 5302.689 | 4873.607 | 4788.719 | 6060.225 | 5811.964 | 7092.14  |
| 9386  | ACAA1     | 1756.56  | 0.342896 | 0.113902   | 3.01045  | 0.002609 | 0.007389 | 1636.559 | 1421.081 | 1592.529 | 2008.914 | 1781.879 | 2098.397 |
| 10822 | HIVEP2    | 1753.151 | 0.342501 | 0.128491   | 2.665566 | 0.007686 | 0.018881 | 1359.553 | 1809.743 | 1469.385 | 1868.29  | 2015.042 | 1996.894 |
| 20076 | LOC103221 | 57.95642 | 0.342398 | 0.336843   | 1.01649  | 0.309396 | 0.409708 | 43.909   | 54.19377 | 54.96278 | 69.19594 | 64.17332 | 61.30375 |
| 25415 | LOC119621 | 2.21043  | 0.342227 | 1.917316   | 0.178493 | 0.858336 | 0.89785  | 1.626259 | 4.379295 | 0        | 2.232127 | 0        | 5.024897 |
| 14115 | KCTD14    | 278.5891 | 0.342054 | 0.171817   | 1.990802 | 0.046503 | 0.08757  | 254.7806 | 251.262  | 233.07   | 285.7123 | 308.0319 | 338.6781 |
| 11754 | ZFP30     | 486.7649 | 0.341995 | 0.139137   | 2.457978 | 0.013972 | 0.031602 | 437.4637 | 446.1406 | 402.1327 | 553.5675 | 564.7252 | 516.5594 |
| 25535 | LOC103245 | 1.278258 | 0.341988 | 2.138338   | 0.159931 | 0.872935 | 0.908794 | 0.542086 | 2.189647 | 0.695731 | 2.232127 | 0        | 2.009959 |
| 21830 | ZNF708    | 35.53552 | 0.341916 | 0.452649   | 0.755366 | 0.450029 | 0.548054 | 31.44101 | 36.67659 | 25.04633 | 55.80317 | 32.08666 | 32.15934 |
| 11772 | SNPH      | 557.3319 | 0.341285 | 0.139054   | 2.454343 | 0.014114 | 0.031874 | 514.9821 | 477.8905 | 485.6205 | 620.5313 | 562.5861 | 682.3811 |
| 22814 | LOC103241 | 19.65272 | 0.34116  | 0.578225   | 0.590012 | 0.555183 | 0.64695  | 15.7205  | 14.23271 | 21.56767 | 26.78552 | 23.53022 | 16.07967 |
| 23015 | LOC119621 | 18.75793 | 0.34115  | 0.609409   | 0.559804 | 0.575613 | 0.6649   | 13.01007 | 13.6853  | 23.65487 | 20.08914 | 14.97377 | 27.13445 |
| 23869 | LOC119621 | 10.44988 | 0.341031 | 0.798218   | 0.427241 | 0.669204 | 0.74532  | 8.131296 | 5.474118 | 13.91463 | 11.16063 | 14.97377 | 9.044815 |
| 12254 | RASSF4    | 414.8246 | 0.340941 | 0.144743   | 2.355483 | 0.018499 | 0.040134 | 383.2551 | 351.4384 | 364.5632 | 466.5145 | 442.7959 | 480.3802 |
| 10176 | SMCR8     | 1506.972 | 0.340784 | 0.120845   | 2.82002  | 0.004802 | 0.012544 | 1272.819 | 1454.473 | 1266.927 | 1651.774 | 1531.603 | 1864.237 |
| 7638  | TOR1AIP1  | 4301.856 | 0.34077  | 0.097008   | 3.512819 | 0.000443 | 0.001543 | 3659.625 | 4161.972 | 3567.015 | 4767.823 | 4791.608 | 4863.096 |
| 17073 | TPSG4     | 143.8575 | 0.340433 | 0.229316   | 1.484561 | 0.13766  | 0.21433  | 121.9694 | 135.2107 | 122.4467 | 149.5525 | 182.2417 | 145.722  |
| 10956 | PARD3B    | 1933.617 | 0.340214 | 0.128944   | 2.638455 | 0.008328 | 0.020209 | 1571.508 | 2004.075 | 1546.611 | 2145.074 | 2030.016 | 2304.418 |
| 22173 | TRNAL-UA1 | 40.18763 | 0.339896 | 0.488664   | 0.695562 | 0.486703 | 0.583548 | 50.41403 | 16.96977 | 39.65669 | 40.17829 | 40.6431  | 53.26391 |
| 11575 | KHDRBS3   | 603.843  | 0.339857 | 0.135914   | 2.500528 | 0.012401 | 0.028482 | 514.9821 | 586.8255 | 498.8394 | 651.7811 | 663.1243 | 707.5055 |
| 12042 | NDUFAF1   | 563.2209 | 0.339792 | 0.141677   | 2.398349 | 0.016469 | 0.036359 | 500.8878 | 511.2826 | 479.3589 | 700.8879 | 549.7514 | 637.157  |
| 19725 | LOC119621 | 69.01989 | 0.339782 | 0.319148   | 1.064654 | 0.287033 | 0.386858 | 66.13454 | 49.26706 | 67.48594 | 71.42806 | 83.42532 | 76.37844 |
| 21911 | LOC103231 | 30.62941 | 0.339565 | 0.457024   | 0.742992 | 0.457487 | 0.555076 | 28.73058 | 26.82318 | 25.04633 | 31.24978 | 42.78221 | 29.1444  |
| 11288 | PLEKHF2   | 893.6643 | 0.339533 | 0.132602   | 2.560543 | 0.010451 | 0.024613 | 755.6684 | 890.0916 | 721.4734 | 921.8684 | 1058.86  | 1014.024 |
| 24895 | LOC103221 | 4.390753 | 0.339434 | 1.276408   | 0.265929 | 0.790294 | 0.843943 | 5.420864 | 4.379295 | 2.087194 | 0        | 6.417332 | 8.039836 |
| 22908 | LOC119621 | 17.99946 | 0.339354 | 0.586509   | 0.5786   | 0.562859 | 0.653205 | 14.63633 | 16.96977 | 16.00182 | 15.62489 | 25.66933 | 19.09461 |
| 7848  | GIPC1     | 2780.631 | 0.33895  | 0.098131   | 3.454063 | 0.000552 | 0.001871 | 2580.331 | 2348.944 | 2439.93  | 3187.477 | 2892.078 | 3235.029 |
| 15325 | MYH7B     | 225.9597 | 0.338734 | 0.190829   | 1.775068 | 0.075887 | 0.131644 | 195.6932 | 193.7838 | 206.6322 | 265.6231 | 275.9453 | 218.0805 |
| 11259 | SCAF11    | 7503.346 | 0.338615 | 0.13186    | 2.567997 | 0.010229 | 0.024152 | 5910.368 | 8140.561 | 5828.837 | 8107.085 | 8652.703 | 8380.524 |
| 10732 | DUSP22    | 739.5298 | 0.3383   | 0.126032   | 2.68424  | 0.007269 | 0.018003 | 641.2882 | 666.7476 | 656.0747 | 787.9408 | 778.6363 | 906.4915 |
| 12815 | ANTXR1    | 1836.024 | 0.338217 | 0.1513     | 2.235408 | 0.025391 | 0.052673 | 1411.593 | 2047.32  | 1406.769 | 1953.111 | 2089.911 | 2107.442 |
| 21906 | LOC103221 | 42.58548 | 0.338111 | 0.45481    | 0.743412 | 0.457232 | 0.554894 | 38.48813 | 32.2973  | 40.35242 | 62.49956 | 57.75599 | 24.11951 |
| 23341 | OLFML2A   | 17.82815 | 0.338055 | 0.666234   | 0.507411 | 0.611866 | 0.696912 | 16.80468 | 14.78012 | 14.61036 | 33.4819  | 19.252   | 8.039836 |
| 8614  | GUSB      | 2869.77  | 0.337951 | 0.104781   | 3.225303 | 0.001258 | 0.003884 | 2505.523 | 2654.4   | 2451.757 | 3133.906 | 2945.555 | 3527.478 |
| 8668  | INPPL1    | 6301.122 | 0.337813 | 0.105187   | 3.211544 | 0.00132  | 0.004049 | 5755.873 | 5224.498 | 5727.956 | 6716.47  | 6502.896 | 7879.039 |
| 21337 | ARHGAP8   | 43.00141 | 0.337695 | 0.40879    | 0.826084 | 0.408757 | 0.509294 | 42.28274 | 29.56024 | 41.74388 | 40.17829 | 62.03421 | 42.20914 |
| 21455 | LOC119621 | 42.38561 | 0.337502 | 0.416511   | 0.810307 | 0.417764 | 0.517653 | 43.909   | 37.224   | 29.91645 | 51.33892 | 57.75599 | 34.1693  |
| 7987  | SEC6B1B   | 2996.477 | 0.33725  | 0.098716   | 3.416383 | 0.000635 | 0.002112 | 2527.207 | 2856.942 | 2555.421 | 3437.476 | 3430.021 | 3877.795 |
| 9991  | MITF      | 3074.17  | 0.336969 | 0.117687   | 2.863253 | 0.004193 | 0.011158 | 2560.274 | 3119.7   | 2473.325 | 3287.923 | 3310.595 | 3673.2   |
| 9681  | RAB43     | 2457.035 | 0.336929 | 0.114751   | 2.936171 | 0.003323 | 0.009125 | 2275.136 | 2047.868 | 2197.815 | 2707.57  | 2438.586 | 3075.237 |
| 11112 | ARHGAP31  | 1540.278 | 0.336836 | 0.129498   | 2.601091 | 0.009293 | 0.022233 | 1292.334 | 1527.826 | 1269.014 | 1578.114 | 1625.724 | 1948.655 |
| 10190 | EXD2      | 990.2028 | 0.336796 | 0.119531   | 2.817653 | 0.004838 | 0.012621 | 873.8432 | 905.4191 | 850.8795 | 1071.421 | 1024.634 | 1215.02  |
| 8000  | AGPAT3    | 4917.614 | 0.336739 | 0.098672   | 3.412721 | 0.000643 | 0.002137 | 4494.98  | 4313.058 | 4237.7   | 5357.105 | 5073.971 | 6028.872 |
| 11655 | NETO2     | 736.7114 | 0.336555 | 0.135715   | 2.479873 | 0.013143 | 0.029979 | 601.7159 | 740.6482 | 611.5479 | 832.5834 | 793.6101 | 840.1628 |
| 11700 | ARRDC1    | 1052.682 | 0.336434 | 0.136101   | 2.471938 | 0.013438 | 0.030544 | 957.3245 | 820.0229 | 1019.246 | 1142.849 | 1063.138 | 1313.508 |
| 23080 | LOC119621 | 19.28243 | 0.336344 | 0.61237    | 0.54925  | 0.582834 | 0.671345 | 15.7205  | 16.42235 | 18.08902 | 22.32127 | 32.08666 | 11.05477 |
| 21762 | LOC119621 | 5081.588 | 0.336301 | 0.438831   | 0.766357 | 0.443464 | 0.541747 | 5307.026 | 2235.082 | 5934.589 | 5879.422 | 4564.862 | 6568.546 |
| 18915 | LOC103211 | 91.73544 | 0.336205 | 0.279848   | 1.201384 | 0.229602 | 0.322706 | 81.31296 | 88.1333  | 73.05179 | 91.51721 | 121.9293 | 94.46807 |
| 24303 | EVX2      | 9.242671 | 0.336009 | 0.930583   | 0.361074 | 0.718044 | 0.785467 | 3.794605 | 7.663765 | 12.52316 | 15.62489 | 12.83466 | 3.014938 |
| 14101 | TRPT1     | 1183.226 | 0.335911 | 0.168475   | 1.993835 | 0.04617  | 0.087046 | 1177.412 | 835.3504 | 1131.259 | 1189.724 | 1163.676 | 1601.937 |
| 13930 | ARID4A    | 1326.511 | 0.335911 | 0.165819   | 2.025772 | 0.042788 | 0.08166  | 1019.664 | 1520.71  | 977.5026 | 1406.24  | 1546.577 | 1488.375 |
| 11146 | NSD3      | 3198.439 | 0.335756 | 0.129506   | 2.592599 | 0.009525 | 0.02272  | 2632.913 | 3385.195 | 2466.368 | 3374.976 | 3642.905 | 3688.275 |
| 17245 | SLC24A1   | 146.0561 | 0.335567 | 0.230052</ |          |          |          |          |          |          |          |          |          |



|       |           |          |          |          |          |          |          |          |          |          |          |          |          |
|-------|-----------|----------|----------|----------|----------|----------|----------|----------|----------|----------|----------|----------|----------|
| 23381 | LOC119619 | 14.84249 | 0.335107 | 0.667731 | 0.501859 | 0.615767 | 0.700148 | 11.9259  | 13.6853  | 13.2189  | 13.39276 | 25.66933 | 11.05477 |
| 18910 | LOC119623 | 88.36181 | 0.334994 | 0.278736 | 1.201832 | 0.229429 | 0.322547 | 76.43418 | 87.03848 | 70.9646  | 89.28508 | 106.9555 | 99.49297 |
| 17563 | ABLIM2    | 143.483  | 0.334944 | 0.238353 | 1.405244 | 0.159949 | 0.242113 | 147.4475 | 128.0944 | 105.7512 | 147.3204 | 160.4333 | 171.8515 |
| 11769 | TMEM150   | 695.464  | 0.334686 | 0.136343 | 2.454737 | 0.014099 | 0.031848 | 659.177  | 602.153  | 588.5887 | 720.977  | 731.5758 | 870.3122 |
| 11110 | TCF19     | 855.4632 | 0.334594 | 0.128545 | 2.602924 | 0.009243 | 0.022118 | 814.7558 | 702.3294 | 756.9557 | 935.2612 | 881.3136 | 1042.164 |
| 18462 | DGCR6L    | 152.4957 | 0.334511 | 0.266671 | 1.254398 | 0.209697 | 0.301961 | 164.7943 | 93.60742 | 147.4951 | 160.7131 | 160.4333 | 187.9312 |
| 15478 | PDE7A     | 241.9683 | 0.334485 | 0.191323 | 1.748276 | 0.080416 | 0.138105 | 224.9658 | 226.6285 | 192.7176 | 236.6055 | 267.3888 | 303.5038 |
| 17464 | RTL8B     | 178.9563 | 0.334295 | 0.236006 | 1.416466 | 0.156639 | 0.238447 | 165.8784 | 119.8832 | 189.2389 | 189.7308 | 216.0502 | 192.9561 |
| 14870 | APBB3     | 245.3238 | 0.334004 | 0.17963  | 1.859405 | 0.06297  | 0.112579 | 200.572  | 215.1328 | 236.5487 | 265.6231 | 271.6671 | 282.3992 |
| 14487 | CCDC24    | 386.8036 | 0.333926 | 0.17324  | 1.927538 | 0.053913 | 0.098928 | 388.1338 | 279.18   | 359.6931 | 428.5684 | 432.1004 | 433.1462 |
| 19862 | LOC119625 | 70.59425 | 0.333904 | 0.318962 | 1.046846 | 0.295171 | 0.395012 | 71.01331 | 56.38342 | 59.13717 | 71.42806 | 96.25998 | 69.34358 |
| 11165 | CDV3      | 6411.205 | 0.333849 | 0.12901  | 2.587785 | 0.00966  | 0.023    | 5148.736 | 6884.251 | 4986.307 | 7053.521 | 6909.327 | 7485.087 |
| 8906  | CRYL1     | 1680.339 | 0.33371  | 0.106165 | 3.143308 | 0.001671 | 0.004987 | 1568.256 | 1375.098 | 1520.173 | 1863.826 | 1798.992 | 1955.69  |
| 9339  | MAPKAPK5  | 2700.357 | 0.333677 | 0.110418 | 3.021951 | 0.002512 | 0.007149 | 2500.102 | 2261.358 | 2414.188 | 2859.355 | 2789.4   | 3377.736 |
| 23797 | LOC103240 | 10.80724 | 0.333624 | 0.763594 | 0.436912 | 0.662175 | 0.739748 | 10.29964 | 8.211177 | 9.740239 | 17.85702 | 10.69555 | 8.039836 |
| 12015 | GM2A      | 1096.32  | 0.333437 | 0.138707 | 2.403898 | 0.016221 | 0.035891 | 1062.489 | 967.2767 | 886.3618 | 1131.688 | 1108.059 | 1422.046 |
| 13888 | LOC103235 | 316.6534 | 0.333312 | 0.163977 | 2.032671 | 0.042086 | 0.080562 | 285.6795 | 255.0939 | 299.8602 | 368.301  | 342.2577 | 348.7279 |
| 11879 | ZNF81     | 1036.266 | 0.333203 | 0.137056 | 2.431151 | 0.015051 | 0.033684 | 849.4493 | 1067.453 | 836.2691 | 1064.725 | 1178.65  | 1221.05  |
| 13228 | TLK1      | 1836.699 | 0.332919 | 0.153875 | 2.163563 | 0.030498 | 0.061293 | 1380.694 | 2068.669 | 1428.337 | 1988.825 | 2032.155 | 2121.512 |
| 7830  | SERPINH1  | 12065.79 | 0.332723 | 0.096205 | 3.458474 | 0.000543 | 0.001844 | 10676.39 | 10958.09 | 10414.4  | 13303.48 | 12274.22 | 14768.17 |
| 12401 | INO80D    | 1131.845 | 0.332457 | 0.143259 | 2.320675 | 0.020304 | 0.043528 | 944.8565 | 1192.263 | 871.0557 | 1203.116 | 1215.015 | 1364.762 |
| 9029  | JUND      | 3239.328 | 0.332311 | 0.107015 | 3.105267 | 0.001901 | 0.005598 | 2736.994 | 3040.873 | 2830.931 | 3667.385 | 3234.335 | 3925.45  |
| 23202 | RNF208    | 15.87389 | 0.332183 | 0.62714  | 0.529679 | 0.596335 | 0.683306 | 15.17842 | 10.40082 | 16.69755 | 15.62489 | 19.252   | 18.08963 |
| 15207 | TRNP1     | 824.5892 | 0.332165 | 0.185042 | 1.795081 | 0.072641 | 0.126991 | 588.1637 | 976.0353 | 625.4625 | 937.4933 | 904.8438 | 915.5363 |
| 14300 | ARHGAP33  | 424.3562 | 0.33214  | 0.169354 | 1.961216 | 0.049854 | 0.092683 | 380.5446 | 330.6367 | 418.8303 | 495.5322 | 400.0137 | 520.5794 |
| 10418 | GOLGA2    | 4088.092 | 0.331883 | 0.120164 | 2.761907 | 0.005746 | 0.014664 | 3371.235 | 4257.769 | 3231.672 | 4437.468 | 4522.08  | 4708.329 |
| 14085 | SNX16     | 403.1516 | 0.331788 | 0.166143 | 1.997    | 0.045825 | 0.086483 | 346.9353 | 380.9986 | 347.17   | 433.0326 | 387.179  | 523.5943 |
| 22748 | LOC103245 | 19.97364 | 0.33165  | 0.551746 | 0.601091 | 0.547779 | 0.640175 | 19.51511 | 18.06459 | 15.30609 | 22.32127 | 23.53022 | 21.10457 |
| 16680 | LOC103216 | 153.6102 | 0.331477 | 0.214507 | 1.545301 | 0.122273 | 0.194888 | 130.6428 | 147.2538 | 130.1018 | 167.4095 | 175.4071 | 170.8465 |
| 9441  | SERP1     | 4419.118 | 0.331217 | 0.110445 | 2.998918 | 0.002709 | 0.007629 | 4220.142 | 3440.483 | 4086.03  | 4859.34  | 4637.592 | 5271.117 |
| 13332 | TPRA1     | 1395.996 | 0.331214 | 0.15461  | 2.142249 | 0.032173 | 0.064156 | 1400.209 | 982.0568 | 1331.63  | 1473.204 | 1416.091 | 1772.784 |
| 7450  | SH3GLB1   | 4350.641 | 0.331089 | 0.092425 | 3.582237 | 0.000341 | 0.001216 | 3701.908 | 4154.856 | 3704.77  | 4830.323 | 4791.608 | 4920.379 |
| 23263 | LOC103238 | 17.17478 | 0.331002 | 0.636339 | 0.520167 | 0.602947 | 0.689072 | 9.215468 | 15.87494 | 20.17621 | 22.32127 | 21.39111 | 14.06971 |
| 10496 | SEC24D    | 3585.163 | 0.330537 | 0.120412 | 2.745045 | 0.00605  | 0.015324 | 2966.297 | 3702.694 | 2862.239 | 3854.883 | 3871.79  | 4253.097 |
| 7566  | NACC1     | 4949.096 | 0.330188 | 0.093357 | 3.536824 | 0.000405 | 0.001423 | 4404.994 | 4386.411 | 4371.28  | 5354.873 | 5187.343 | 5989.678 |
| 8707  | GORASP1   | 2422.33  | 0.330036 | 0.103116 | 3.200636 | 0.001371 | 0.004187 | 2257.79  | 2075.786 | 2110.849 | 2680.785 | 2496.342 | 2912.431 |
| 9527  | GABARAPL  | 2663.704 | 0.329874 | 0.110794 | 2.977372 | 0.002907 | 0.008113 | 2443.725 | 2119.031 | 2515.069 | 2984.354 | 3174.44  | 2745.604 |
| 9453  | TNS2      | 6320.674 | 0.329783 | 0.110043 | 2.996868 | 0.002728 | 0.007671 | 5283.174 | 5801.47  | 5727.956 | 6729.863 | 6363.854 | 8017.726 |
| 8706  | DYNLT3    | 1313.061 | 0.329487 | 0.102939 | 3.200816 | 0.00137  | 0.004185 | 1179.038 | 1171.461 | 1137.521 | 1511.15  | 1480.265 | 1398.931 |
| 22762 | LOC103237 | 25.36899 | 0.329473 | 0.549635 | 0.599439 | 0.54888  | 0.641039 | 14.63633 | 34.48694 | 18.08902 | 26.78552 | 32.08666 | 26.12947 |
| 24243 | ST6GALNA  | 8.86212  | 0.329093 | 0.891673 | 0.369074 | 0.712073 | 0.780863 | 3.794605 | 8.758589 | 11.1317  | 4.464254 | 14.97377 | 10.04979 |
| 20654 | LOC103230 | 67.442   | 0.32899  | 0.354481 | 0.92809  | 0.353361 | 0.454832 | 53.12446 | 78.8273  | 47.30973 | 58.0353  | 91.98176 | 75.37346 |
| 23913 | CCDC184   | 10.21859 | 0.328858 | 0.781099 | 0.42102  | 0.67374  | 0.749023 | 7.589209 | 7.663765 | 11.82743 | 15.62489 | 8.556443 | 10.04979 |
| 18027 | ZCWPW1    | 130.3739 | 0.328667 | 0.245569 | 1.338388 | 0.18077  | 0.266587 | 128.4745 | 113.3142 | 102.9682 | 167.4095 | 145.4595 | 124.6175 |
| 23988 | LOC119620 | 14.86994 | 0.3286   | 0.805066 | 0.408165 | 0.683152 | 0.757112 | 19.51511 | 3.284471 | 17.39328 | 8.928508 | 14.97377 | 25.12449 |
| 12531 | CUNH6orf  | 511.1259 | 0.32856  | 0.143112 | 2.295828 | 0.021686 | 0.046017 | 415.7802 | 483.912  | 461.9656 | 575.8888 | 526.2212 | 602.9877 |
| 6801  | SAR1A     | 8061.617 | 0.328391 | 0.086019 | 3.817665 | 0.000135 | 0.000527 | 7375.627 | 6773.126 | 7299.614 | 8752.17  | 8840.944 | 9328.219 |
| 9868  | LOC103233 | 1802.018 | 0.328199 | 0.113579 | 2.889594 | 0.003857 | 0.010392 | 1620.838 | 1530.016 | 1649.579 | 1955.343 | 1818.244 | 2238.089 |
| 10579 | SH3PXD2A  | 1051.708 | 0.328134 | 0.120323 | 2.727111 | 0.006389 | 0.016056 | 890.1058 | 973.8456 | 938.5416 | 1055.796 | 1178.65  | 1273.309 |
| 11199 | CLN3      | 908.4437 | 0.328088 | 0.12704  | 2.582563 | 0.009807 | 0.02328  | 859.2069 | 725.8681 | 834.1819 | 1033.475 | 932.6523 | 1065.278 |
| 15310 | ZNF713    | 258.8642 | 0.328074 | 0.18454  | 1.777794 | 0.075438 | 0.130994 | 228.2184 | 251.262  | 206.6322 | 314.7299 | 293.0582 | 259.2847 |
| 23922 | DYNLT2    | 11.36216 | 0.328002 | 0.781958 | 0.419462 | 0.674878 | 0.749975 | 10.84173 | 10.40082 | 8.348776 | 11.16063 | 21.39111 | 6.029877 |
| 22364 | LOC103244 | 27.02463 | 0.32789  | 0.493452 | 0.664481 | 0.506382 | 0.601903 | 29.81475 | 22.9913  | 19.48048 | 29.01765 | 25.66933 | 35.17428 |
| 10973 | NCDN      | 1357.908 | 0.327664 | 0.12435  | 2.635001 | 0.008414 | 0.020379 | 1208.853 | 1118.362 | 1291.973 | 1477.668 | 1356.196 | 1694.395 |
| 18782 | LOC103243 | 105.3936 | 0.327595 | 0.268425 | 1.220437 | 0.222299 | 0.316454 | 88.36008 | 105.6505 | 84.87923 | 116.0706 | 136.9031 | 100.4979 |
| 13188 | B3GALT4   | 595.8932 | 0.327546 | 0.150864 | 2.171133 | 0.029921 | 0.060312 | 567.5644 | 471.869  | 550.3235 | 651.1781 | 586.1163 | 747.7047 |
| 10110 | ETNK2     | 1820.399 | 0.327514 | 0.115478 | 2.836173 | 0.004566 | 0.012006 | 1727.087 | 1560.124 | 1562.613 | 1962.04  | 1850.331 | 2260.199 |
| 25412 | LOC119620 | 1.58146  | 0.327501 | 1.828272 | 0.179132 | 0.857834 | 0.897431 | 1.626259 | 1.094824 | 1.391463 | 2.232127 | 2.139111 | 1.004979 |
| 9584  | USF1      | 1383.285 | 0.327427 | 0.110451 | 2.964452 | 0.003032 | 0.008411 | 1272.819 | 1198.284 | 1212.66  | 1598.203 | 1394.7   | 1623.042 |
| 24137 | LOC103219 | 9.759857 | 0.327412 | 0.852065 | 0.384257 | 0.700788 | 0.771798 | 9.757555 | 10.94824 | 4.87012  | 6.696381 | 19.252   | 7.034856 |
| 12430 | GALNT18   | 566.2002 | 0.327374 | 0.141394 | 2.315338 | 0.020594 | 0.044041 | 525.2817 | 486.1017 | 491.8821 | 616.067  | 708.0456 | 569.8234 |
| 14384 | PCLAF     | 989.1658 | 0.327092 | 0.167926 | 1.947836 | 0.051435 | 0.095063 | 974.6713 | 645.3985 | 1013.681 | 1082.582 | 1093.086 | 1125.577 |
| 21988 | LOC103247 | 33.56466 | 0.327038 | 0.448185 | 0.729694 | 0.465577 | 0.562915 | 31.9831  | 31.74989 | 25.04633 | 31.24978 | 49.19955 | 32.15934 |
| 18889 | LOC103237 | 108.6013 | 0.326918 | 0.271212 | 1.205397 | 0.22805  | 0.320965 | 76.97626 | 105.1031 | 107.8384 | 127.2312 | 104.8164 | 129.6424 |
| 20079 | LOC103242 | 65.86779 | 0.326808 | 0.321654 | 1.016022 | 0.309619 | 0.409942 | 58.00324 | 63.49977 | 52.87558 | 87.05295 | 68.45154 | 65.32367 |
| 23929 | LOC103215 | 11.41002 | 0.326787 | 0.780447 | 0.418718 | 0.675422 | 0.750391 | 10.84173 | 7.116354 | 11.82743 | 13.39276 | 19.252   | 6.029877 |
| 14158 | FAM200A   | 996.9239 | 0.326782 | 0.164758 | 1.983412 | 0.047321 | 0.088857 | 321.9993 | 390.3046 | 341.6041 | 502.2286 | 421.4048 | 404.0017 |
| 12658 | BCL7A     | 449.4293 | 0.326496 | 0.143928 | 2.268458 | 0.023301 | 0.048939 | 383.2551 | 423.6967 | 391.001  | 506.6928 | 466.3261 | 525.6043 |
| 21740 | LOC119624 | 42.78299 | 0.326468 | 0.423403 | 0.771057 | 0.440673 | 0.538882 | 37.94605 | 34.48694 | 42.43961 | 26.78552 | 57.75599 | 57.28383 |
| 18455 | USP27X    | 119.0758 | 0.326446 | 0.259955 | 1.255778 | 0.       |          |          |          |          |          |          |          |



|       |           |          |          |          |          |          |          |          |          |          |          |          |          |
|-------|-----------|----------|----------|----------|----------|----------|----------|----------|----------|----------|----------|----------|----------|
| 25418 | LOC11961f | 1.582348 | 0.325964 | 1.828195 | 0.178298 | 0.858489 | 0.897869 | 1.084173 | 1.642235 | 1.391463 | 2.232127 | 2.139111 | 1.004979 |
| 13398 | LOC10324  | 910.6478 | 0.325917 | 0.153156 | 2.128012 | 0.033336 | 0.066147 | 886.8533 | 677.1484 | 865.4898 | 973.2074 | 898.4265 | 1162.761 |
| 12236 | LOC11962f | 1914.875 | 0.325849 | 0.138088 | 2.359726 | 0.018288 | 0.039735 | 1654.448 | 1556.292 | 1881.953 | 2234.359 | 2406.5   | 1755.699 |
| 16119 | LOC11961f | 192.0171 | 0.32577  | 0.198329 | 1.642572 | 0.100471 | 0.165707 | 182.141  | 155.465  | 173.9328 | 200.8914 | 224.6066 | 215.0656 |
| 24149 | LOC11962f | 13.09613 | 0.325757 | 0.849554 | 0.383445 | 0.70139  | 0.772142 | 21.68345 | 2.737059 | 10.43597 | 20.08914 | 8.556443 | 15.07469 |
| 23187 | LOC11962f | 19.49826 | 0.325733 | 0.612638 | 0.531688 | 0.594942 | 0.682113 | 16.26259 | 11.49565 | 23.65487 | 31.24978 | 19.252   | 15.07469 |
| 24976 | LOC11962f | 4.746628 | 0.325532 | 1.297095 | 0.25097  | 0.801837 | 0.853493 | 4.336691 | 0.547412 | 7.653045 | 2.232127 | 10.69555 | 3.014938 |
| 21516 | LOC11962f | 39.18423 | 0.325328 | 0.405796 | 0.801703 | 0.422725 | 0.522316 | 30.89892 | 32.2973  | 41.04815 | 46.87467 | 42.78221 | 41.20416 |
| 10611 | PICALM    | 21028.47 | 0.32519  | 0.119624 | 2.718447 | 0.006559 | 0.016432 | 16893.58 | 22332.21 | 16779.65 | 23350.28 | 23072.45 | 23742.64 |
| 9632  | RREB1     | 1772.209 | 0.325186 | 0.110131 | 2.952713 | 0.00315  | 0.008694 | 1551.451 | 1703.546 | 1468.689 | 1879.451 | 1916.643 | 2113.472 |
| 8654  | MRPL18    | 1693.09  | 0.325161 | 0.101153 | 3.214548 | 0.001307 | 0.004014 | 1567.172 | 1414.512 | 1529.218 | 1897.308 | 1826.801 | 1923.531 |
| 23878 | ITM2A     | 11.0799  | 0.325149 | 0.762792 | 0.426262 | 0.669917 | 0.745876 | 9.215468 | 8.211177 | 11.82743 | 8.928508 | 19.252   | 9.044815 |
| 9345  | ITLE5     | 4447.864 | 0.325125 | 0.107659 | 3.019959 | 0.002528 | 0.007192 | 3612.464 | 4395.169 | 3841.829 | 4995.5   | 4618.34  | 5223.883 |
| 10553 | NFU1      | 1191.542 | 0.325015 | 0.118904 | 2.733431 | 0.006268 | 0.01579  | 982.2605 | 1171.461 | 1017.159 | 1372.758 | 1343.361 | 1262.254 |
| 12387 | ZNF649    | 648.4702 | 0.325014 | 0.139748 | 2.325715 | 0.020034 | 0.042997 | 607.1367 | 605.4375 | 514.1455 | 658.4775 | 785.0536 | 720.5703 |
| 10063 | BAG4      | 1350.349 | 0.324994 | 0.114095 | 2.848447 | 0.004393 | 0.011607 | 1136.213 | 1325.831 | 1132.651 | 1544.632 | 1499.517 | 1463.25  |
| 10904 | NDRG4     | 1111.419 | 0.324935 | 0.122603 | 2.650303 | 0.008042 | 0.019607 | 978.4659 | 991.9102 | 996.2873 | 1183.027 | 1120.894 | 1397.926 |
| 23190 | NIBAN3    | 24.55007 | 0.324747 | 0.611713 | 0.530881 | 0.595501 | 0.682682 | 18.43094 | 21.34906 | 24.3506  | 33.4819  | 40.6431  | 9.044815 |
| 20438 | LOC11962f | 96.10671 | 0.324672 | 0.339596 | 0.956054 | 0.339045 | 0.441014 | 119.259  | 60.76271 | 74.44326 | 107.1421 | 132.6249 | 82.40832 |
| 11213 | LOC10323f | 958.9396 | 0.324636 | 0.125899 | 2.57854  | 0.009922 | 0.023524 | 825.0555 | 954.6862 | 773.6533 | 1095.974 | 1046.025 | 1058.243 |
| 10473 | STK3      | 2453.642 | 0.324625 | 0.118024 | 2.750496 | 0.005951 | 0.015105 | 2013.851 | 2520.284 | 2001.619 | 2783.462 | 2661.054 | 2741.584 |
| 24425 | LOC10324f | 6.994514 | 0.32444  | 0.951063 | 0.341134 | 0.733003 | 0.797825 | 7.589209 | 4.379295 | 6.261582 | 11.16063 | 8.556443 | 4.019918 |
| 23882 | LOC10321f | 11.108   | 0.324366 | 0.762038 | 0.425657 | 0.670358 | 0.746199 | 14.09425 | 8.758589 | 6.957314 | 8.928508 | 12.83466 | 15.07469 |
| 22219 | LOC11962f | 34.53671 | 0.324309 | 0.470595 | 0.689148 | 0.49073  | 0.587158 | 28.73058 | 31.20247 | 32.69937 | 49.10679 | 19.252   | 46.22906 |
| 8636  | ADPGK     | 1925.121 | 0.324206 | 0.100722 | 3.218808 | 0.001287 | 0.003963 | 1755.276 | 1629.645 | 1748.373 | 2127.217 | 2030.016 | 2260.199 |
| 18093 | LOC10322f | 137.4436 | 0.324199 | 0.245085 | 1.322801 | 0.185902 | 0.273155 | 148.5317 | 104.5557 | 113.4042 | 151.7846 | 147.5986 | 158.7868 |
| 13914 | LOC11962f | 355.3204 | 0.324118 | 0.15981  | 2.028149 | 0.042545 | 0.081289 | 335.5515 | 283.0119 | 329.0809 | 401.7829 | 376.4835 | 406.0117 |
| 22602 | LOC10321f | 24.42209 | 0.32397  | 0.519387 | 0.623753 | 0.53279  | 0.626652 | 20.59928 | 25.72836 | 18.08902 | 26.78552 | 34.22577 | 21.10457 |
| 10649 | NME7      | 1117.921 | 0.323968 | 0.119756 | 2.705226 | 0.006826 | 0.01704  | 963.2875 | 1072.927 | 937.8459 | 1312.491 | 1281.327 | 1139.647 |
| 23854 | LOC10322f | 11.5139  | 0.323915 | 0.754054 | 0.429564 | 0.667513 | 0.743935 | 13.01007 | 8.211177 | 9.740239 | 15.62489 | 6.417332 | 16.07967 |
| 12171 | KEAP1     | 2662.644 | 0.323806 | 0.136526 | 2.371759 | 0.017704 | 0.03867  | 2630.203 | 2004.075 | 2466.368 | 2930.783 | 2579.767 | 3364.671 |
| 9622  | NCSTN     | 3008.154 | 0.323748 | 0.109556 | 2.955096 | 0.003126 | 0.008636 | 2482.756 | 3004.743 | 2530.375 | 3374.976 | 3180.858 | 3475.219 |
| 14063 | ZSWIM1    | 681.4892 | 0.323635 | 0.161717 | 2.001246 | 0.045366 | 0.085761 | 554.0123 | 739.5534 | 521.1028 | 814.7263 | 720.8803 | 738.6599 |
| 15223 | NPAS2     | 285.2063 | 0.323378 | 0.180474 | 1.791827 | 0.731161 | 0.127766 | 226.05   | 273.7059 | 261.595  | 339.2833 | 275.9453 | 334.6582 |
| 14662 | RBM43     | 570.3181 | 0.323197 | 0.170509 | 1.895477 | 0.058029 | 0.105218 | 434.7533 | 631.1658 | 454.3126 | 611.6028 | 643.8723 | 646.2018 |
| 13530 | LOC11962f | 384.9032 | 0.322836 | 0.153595 | 2.101866 | 0.035565 | 0.069881 | 353.9824 | 360.197  | 313.0791 | 406.2471 | 425.683  | 450.2308 |
| 24958 | LOC11962f | 3.488168 | 0.322722 | 1.273088 | 0.253495 | 0.799886 | 0.85203  | 3.252518 | 3.831883 | 2.087194 | 4.464254 | 4.278221 | 3.014938 |
| 11806 | PTPRE     | 683.4906 | 0.322695 | 0.131835 | 2.447709 | 0.014377 | 0.032374 | 601.7159 | 666.7476 | 553.1064 | 738.834  | 780.7754 | 759.7645 |
| 13503 | LOC11962f | 479.6458 | 0.322633 | 0.153164 | 2.106463 | 0.035164 | 0.069234 | 423.9115 | 481.175  | 372.2163 | 531.2462 | 549.7514 | 519.5744 |
| 22963 | MUSTN1    | 21.94656 | 0.322454 | 0.566456 | 0.569248 | 0.569188 | 0.658967 | 23.8518  | 13.13788 | 20.87194 | 26.78552 | 29.94755 | 17.08465 |
| 14109 | SPPL2B    | 1395.424 | 0.322347 | 0.161837 | 1.991797 | 0.046393 | 0.087417 | 1375.273 | 924.0311 | 1423.466 | 1571.417 | 1433.204 | 1645.151 |
| 7416  | ABCC4     | 15887.14 | 0.322282 | 0.089693 | 3.593181 | 0.000327 | 0.001171 | 14047.08 | 15006.2  | 13310.73 | 17370.41 | 16963.15 | 18625.28 |
| 13774 | GAREM1    | 849.1843 | 0.322188 | 0.157004 | 2.0521   | 0.04016  | 0.077507 | 677.0659 | 930.6001 | 657.4661 | 937.4933 | 900.5656 | 991.9147 |
| 16083 | TFAP2A    | 478.0909 | 0.321767 | 0.194973 | 1.650317 | 0.098878 | 0.163444 | 330.1306 | 550.1489 | 395.1754 | 497.7643 | 547.6123 | 547.7138 |
| 11458 | TNRC6B    | 3310.048 | 0.321574 | 0.127341 | 1.525231 | 0.01156  | 0.026821 | 2661.102 | 3492.487 | 2677.174 | 3508.904 | 3568.037 | 3952.584 |
| 20150 | ANKRD37   | 65.94629 | 0.321496 | 0.320306 | 1.003715 | 0.315516 | 0.416271 | 66.67662 | 50.36189 | 58.44144 | 78.12444 | 72.72976 | 69.34358 |
| 8528  | RFTN1     | 2444.25  | 0.321324 | 0.098968 | 3.246747 | 0.001167 | 0.003639 | 2229.601 | 2195.669 | 2099.022 | 2685.249 | 2545.542 | 2910.421 |
| 13662 | ANKRD13C  | 539.6549 | 0.321199 | 0.154731 | 2.075855 | 0.037907 | 0.073764 | 482.4569 | 419.3174 | 541.279  | 582.5851 | 554.0297 | 658.2616 |
| 16195 | FBXL8     | 223.7319 | 0.321196 | 0.197339 | 1.627636 | 0.103602 | 0.170069 | 215.7504 | 170.2451 | 212.1981 | 249.9982 | 228.8848 | 265.3146 |
| 21913 | LOC11962f | 36.37627 | 0.321135 | 0.432696 | 0.742172 | 0.457983 | 0.555628 | 29.27266 | 35.58177 | 31.30791 | 53.57105 | 36.36488 | 32.15934 |
| 13005 | MAP1B     | 43489.67 | 0.32108  | 0.145748 | 2.202988 | 0.027596 | 0.056411 | 32277.45 | 49604.27 | 34129.8  | 46885.83 | 47237.98 | 50802.72 |
| 11773 | ZNF394    | 925.1843 | 0.320987 | 0.130792 | 2.454174 | 0.014121 | 0.031887 | 766.5101 | 938.2638 | 764.6088 | 991.0644 | 1020.356 | 1070.303 |
| 12476 | MUL1      | 1029.535 | 0.32087  | 0.139185 | 2.305343 | 0.021147 | 0.045063 | 1018.58  | 844.109  | 889.1447 | 1091.51  | 1020.356 | 1313.508 |
| 24826 | LOC11962f | 4.767644 | 0.320845 | 1.158307 | 0.276995 | 0.781784 | 0.837176 | 5.96295  | 5.474118 | 1.391463 | 4.464254 | 4.278221 | 7.034856 |
| 21955 | LOC10322f | 43.86259 | 0.320465 | 0.435909 | 0.735165 | 0.462239 | 0.559719 | 49.32986 | 29.01283 | 37.56949 | 44.64254 | 68.45154 | 34.1693  |
| 12340 | DYNC21I   | 617.9766 | 0.320111 | 0.137023 | 2.336178 | 0.019482 | 0.041971 | 597.9213 | 521.136  | 532.9302 | 631.6919 | 684.5154 | 739.6649 |
| 17066 | FBXW9     | 293.6476 | 0.319802 | 0.215328 | 1.485187 | 0.137494 | 0.214185 | 304.1105 | 186.6674 | 293.5986 | 334.819  | 308.0319 | 334.6582 |
| 9697  | PTPRK     | 9677.438 | 0.319651 | 0.109037 | 2.931581 | 0.003372 | 0.009246 | 8078.713 | 9770.753 | 7982.822 | 10749.92 | 10036.71 | 11445.71 |
| 14273 | LIN7B     | 302.6679 | 0.319622 | 0.162577 | 1.965971 | 0.049302 | 0.09183  | 275.922  | 253.4517 | 278.9883 | 321.4263 | 346.5359 | 339.6831 |
| 11491 | KDM4B     | 951.5138 | 0.319449 | 0.126853 | 2.518255 | 0.011794 | 0.027286 | 914.4997 | 806.885  | 822.3545 | 1053.564 | 954.0434 | 1157.736 |
| 20408 | LOC10321f | 69.93489 | 0.319406 | 0.332754 | 0.959886 | 0.337113 | 0.439148 | 76.97626 | 56.93083 | 53.57132 | 60.26743 | 83.42532 | 88.43819 |
| 17590 | LOC10321f | 154.0642 | 0.319329 | 0.227686 | 1.402496 | 0.160767 | 0.242979 | 151.7842 | 119.8832 | 140.5377 | 147.3204 | 183.9635 | 180.8963 |
| 23739 | LOC11961f | 16.33086 | 0.319238 | 0.714629 | 0.446719 | 0.655078 | 0.733614 | 7.047123 | 13.6853  | 22.2634  | 24.5534  | 21.39111 | 9.044815 |
| 23979 | NOG       | 12.86303 | 0.319206 | 0.778341 | 0.410111 | 0.681725 | 0.755814 | 7.589209 | 8.211177 | 18.08902 | 24.5534  | 10.69555 | 8.039836 |
| 10138 | AGFG2     | 1239.702 | 0.319087 | 0.112762 | 2.829745 | 0.004659 | 0.012216 | 1083.631 | 1048.841 | 1180.656 | 1386.151 | 1287.745 | 1451.19  |
| 13344 | LOC10322f | 707.2203 | 0.319025 | 0.149191 | 2.138362 | 0.032487 | 0.064724 | 672.7292 | 531.5369 | 687.3826 | 756.691  | 733.715  | 861.2674 |
| 21195 | HSF4      | 56.18859 | 0.318954 | 0.374983 | 0.850581 | 0.395002 | 0.495438 | 40.65648 | 48.17224 | 59.8329  | 73.66019 | 70.59065 | 44.2191  |
| 18780 | LOC10324f | 134.2025 | 0.31878  | 0.261059 | 1.221102 | 0.222047 | 0.314331 | 91.6126  | 148.3486 | 118.9701 | 147.3204 | 141.1813 | 157.7818 |
| 9603  | MRPS22    | 1983.442 | 0.31864  | 0.107631 | 2.960469 | 0.003072 | 0.008503 | 1872.908 | 1641.688 | 1777.594 | 2377.215 | 2151.945 | 2079.303 |
| 10879 | FBXO45    | 1576.678 | 0.318608 |          |          |          |          |          |          |          |          |          |          |



|       |           |          |          |          |          |          |          |          |          |          |          |          |          |
|-------|-----------|----------|----------|----------|----------|----------|----------|----------|----------|----------|----------|----------|----------|
| 20099 | LOC103232 | 87.54147 | 0.317939 | 0.313939 | 1.012743 | 0.311183 | 0.411603 | 83.4813  | 54.74118 | 95.3152  | 107.1421 | 94.12087 | 90.44815 |
| 22293 | TRNAN-GL  | 39.39329 | 0.317937 | 0.470862 | 0.675224 | 0.499533 | 0.59568  | 26.02015 | 48.17224 | 29.91645 | 64.73168 | 36.36488 | 31.15436 |
| 24284 | TRNAS-AG  | 7.999161 | 0.317879 | 0.872433 | 0.364359 | 0.71559  | 0.783395 | 7.047123 | 7.116354 | 7.653045 | 6.696381 | 6.417332 | 13.06473 |
| 11759 | HEXIM1    | 2727.858 | 0.317846 | 0.129402 | 2.456267 | 0.014039 | 0.031739 | 2115.221 | 2806.58  | 2367.574 | 3051.318 | 2723.088 | 3303.368 |
| 23158 | FITM1     | 19.73369 | 0.317843 | 0.592932 | 0.536052 | 0.591922 | 0.679488 | 16.26259 | 12.59047 | 23.65487 | 17.85702 | 29.94755 | 18.08963 |
| 14090 | LOC119624 | 353.2404 | 0.317797 | 0.159161 | 1.996702 | 0.045858 | 0.086524 | 348.5615 | 299.9817 | 294.2944 | 395.0865 | 393.5964 | 387.9221 |
| 23769 | LOC103211 | 12.72584 | 0.317657 | 0.717994 | 0.442423 | 0.658183 | 0.736161 | 11.38381 | 9.853413 | 13.2189  | 6.696381 | 17.11289 | 18.08963 |
| 13298 | RSAD1     | 1049.451 | 0.31765  | 0.147886 | 2.147937 | 0.031719 | 0.063411 | 1050.563 | 789.3678 | 967.0666 | 1176.331 | 1013.938 | 1299.438 |
| 6727  | DBI       | 8719.102 | 0.317369 | 0.08251  | 3.846445 | 0.00012  | 0.000474 | 7546.926 | 7933.092 | 7807.497 | 9997.697 | 9739.371 | 9290.03  |
| 24126 | LOC103221 | 9.59692  | 0.316872 | 0.819866 | 0.386492 | 0.699132 | 0.77039  | 10.84173 | 5.474118 | 9.044508 | 15.62489 | 8.556443 | 8.039836 |
| 13389 | RFX2      | 447.6161 | 0.316431 | 0.148585 | 2.129636 | 0.033202 | 0.065926 | 410.9015 | 379.9038 | 409.09   | 468.7467 | 466.3261 | 550.7287 |
| 15003 | TMEM141   | 1039.59  | 0.316406 | 0.172649 | 1.832654 | 0.066854 | 0.118464 | 1021.833 | 671.1269 | 1086.732 | 1180.795 | 1078.112 | 1198.941 |
| 12150 | MAPK11    | 1823.782 | 0.316363 | 0.133179 | 2.375479 | 0.017526 | 0.038348 | 1716.245 | 1419.439 | 1744.894 | 1843.737 | 1888.835 | 2329.542 |
| 15030 | LOC103241 | 389.7952 | 0.316218 | 0.173047 | 1.827352 | 0.067647 | 0.119654 | 330.1306 | 410.5589 | 299.1645 | 435.2648 | 455.6306 | 408.0217 |
| 16881 | SMIM17    | 161.0629 | 0.316069 | 0.209402 | 1.509393 | 0.131198 | 0.206612 | 150.7    | 134.6633 | 144.7121 | 176.338  | 186.1026 | 173.8614 |
| 22129 | LOC119621 | 32.1409  | 0.315934 | 0.448724 | 0.704072 | 0.481388 | 0.578327 | 31.44101 | 26.82318 | 27.82925 | 26.78552 | 42.78221 | 37.18424 |
| 14145 | ADAM15    | 2309.832 | 0.315863 | 0.159002 | 1.986536 | 0.046974 | 0.088286 | 2349.402 | 1629.645 | 2200.598 | 2417.394 | 2211.84  | 3050.113 |
| 15338 | ABHD6     | 276.2285 | 0.315797 | 0.178152 | 1.77263  | 0.07629  | 0.132214 | 251.5281 | 220.607  | 264.3779 | 325.895  | 316.5884 | 278.3793 |
| 12185 | ZNF512B   | 2425.991 | 0.315675 | 0.133216 | 2.369649 | 0.017805 | 0.038847 | 2289.231 | 1833.282 | 2368.27  | 2604.892 | 2417.195 | 3043.078 |
| 22353 | LOC119619 | 31.18833 | 0.315458 | 0.473306 | 0.666499 | 0.505092 | 0.600709 | 35.23561 | 20.80165 | 27.13352 | 29.01765 | 42.78221 | 32.15934 |
| 13610 | CHST2     | 554.5162 | 0.315389 | 0.151088 | 2.087445 | 0.036848 | 0.071977 | 462.9418 | 558.9075 | 463.3571 | 609.3707 | 556.1688 | 676.3512 |
| 25217 | LOC119618 | 2.544576 | 0.315356 | 1.491119 | 0.211489 | 0.832506 | 0.877668 | 1.626259 | 1.642235 | 3.478657 | 2.232127 | 4.278221 | 2.009959 |
| 24783 | LOC119621 | 5.364758 | 0.314926 | 1.106388 | 0.284643 | 0.775918 | 0.832336 | 4.336691 | 7.116354 | 2.782925 | 2.232127 | 10.69555 | 5.024897 |
| 23765 | LOC119618 | 13.70448 | 0.31492  | 0.711084 | 0.442874 | 0.657857 | 0.735932 | 6.505036 | 14.23271 | 16.00182 | 11.16063 | 19.252   | 15.07469 |
| 19339 | LOC119621 | 154.6922 | 0.314863 | 0.278995 | 1.128565 | 0.259082 | 0.356156 | 104.6227 | 192.689  | 115.4914 | 165.1774 | 190.3808 | 159.7917 |
| 19264 | XKR5      | 98.58347 | 0.314656 | 0.275419 | 1.142463 | 0.253262 | 0.34951  | 102.9964 | 83.75401 | 77.92191 | 102.6778 | 100.5382 | 123.6125 |
| 10830 | DAG1      | 6807.214 | 0.314497 | 0.11801  | 2.665006 | 0.007699 | 0.018898 | 5804.119 | 6956.509 | 5448.272 | 7270.038 | 7061.204 | 8303.14  |
| 11334 | CORO6     | 837.7707 | 0.314377 | 0.123287 | 2.549953 | 0.010774 | 0.025271 | 712.3015 | 755.9757 | 774.349  | 977.6716 | 838.5314 | 967.7952 |
| 12743 | ZNF75D    | 662.5246 | 0.314312 | 0.139683 | 2.250184 | 0.024437 | 0.050982 | 580.5745 | 662.3683 | 529.4516 | 687.4951 | 761.5234 | 753.7346 |
| 14050 | ARID4B    | 4857.809 | 0.31431  | 0.156754 | 2.005109 | 0.044951 | 0.085056 | 3750.696 | 5655.859 | 3585.104 | 5100.41  | 5642.974 | 5411.814 |
| 11000 | KATNA1    | 1013.468 | 0.314192 | 0.119517 | 2.628837 | 0.008568 | 0.020706 | 896.0688 | 964.5396 | 847.4008 | 1218.741 | 1071.694 | 1082.363 |
| 23525 | LOC103221 | 21.10264 | 0.313978 | 0.654839 | 0.479473 | 0.631602 | 0.713758 | 12.46799 | 31.20247 | 11.82743 | 31.24978 | 27.80844 | 12.05975 |
| 24423 | LOC119620 | 7.384795 | 0.313802 | 0.917911 | 0.341866 | 0.732452 | 0.797291 | 4.878777 | 8.211177 | 6.957314 | 8.928508 | 4.278221 | 11.05477 |
| 12653 | TMEM9B    | 778.0988 | 0.313737 | 0.138212 | 2.269974 | 0.023209 | 0.048764 | 765.426  | 620.2176 | 696.4271 | 930.797  | 774.3581 | 881.367  |
| 14129 | FADD      | 570.9135 | 0.313674 | 0.157746 | 1.988468 | 0.04676  | 0.087983 | 572.9853 | 440.1191 | 516.9284 | 551.3354 | 656.707  | 687.406  |
| 11595 | BTBD11    | 767.9698 | 0.313287 | 0.125516 | 2.495986 | 0.012561 | 0.028799 | 674.8975 | 732.437  | 649.8131 | 850.4404 | 795.7492 | 904.4815 |
| 24340 | TRNAL-AA  | 8.342153 | 0.313261 | 0.880944 | 0.355597 | 0.722143 | 0.788749 | 5.420864 | 8.211177 | 8.348776 | 15.62489 | 6.417332 | 6.029877 |
| 19770 | LOC119621 | 83.51543 | 0.313228 | 0.296107 | 1.05782  | 0.290138 | 0.390152 | 88.90216 | 67.33165 | 67.48594 | 80.35657 | 100.5382 | 96.47803 |
| 10818 | NBN       | 2931.983 | 0.313221 | 0.117481 | 2.66613  | 0.007673 | 0.018855 | 2349.944 | 3028.83  | 2464.281 | 3287.923 | 3294.23  | 3166.69  |
| 14410 | TMOD2     | 351.5343 | 0.312895 | 0.161151 | 1.941626 | 0.052182 | 0.096271 | 294.895  | 350.891  | 294.2944 | 390.6222 | 393.5964 | 384.9071 |
| 23096 | LOC119619 | 20.18357 | 0.312762 | 0.573091 | 0.545745 | 0.585241 | 0.673651 | 13.01007 | 19.15941 | 21.56767 | 29.01765 | 19.252   | 19.09461 |
| 10282 | ZNF300    | 998.8602 | 0.312737 | 0.111988 | 2.792586 | 0.005229 | 0.01352  | 860.2911 | 930.6001 | 884.2746 | 1053.564 | 1118.755 | 1145.677 |
| 8938  | BTBD10    | 1797.86  | 0.312575 | 0.099713 | 3.134758 | 0.00172  | 0.005116 | 1580.182 | 1687.671 | 1545.915 | 1917.397 | 1995.79  | 2060.208 |
| 15366 | CIR1      | 1362.773 | 0.312486 | 0.176885 | 1.766611 | 0.077293 | 0.133734 | 993.1022 | 1628.55  | 1024.117 | 1575.882 | 1503.795 | 1451.19  |
| 10164 | CAB39     | 7113.764 | 0.312463 | 0.110691 | 2.822835 | 0.00476  | 0.012451 | 5932.051 | 7293.715 | 5815.619 | 7689.677 | 7681.546 | 8269.976 |
| 24082 | PROC      | 10.58962 | 0.312439 | 0.795001 | 0.393004 | 0.694316 | 0.766481 | 9.757555 | 7.663765 | 10.43597 | 20.08914 | 8.556443 | 7.034856 |
| 24381 | GPC5      | 7.62431  | 0.31239  | 0.89415  | 0.349371 | 0.726811 | 0.792513 | 5.96295  | 6.568942 | 7.653045 | 6.696381 | 12.83466 | 6.029877 |
| 11569 | SAMHD1    | 928.3594 | 0.312367 | 0.124876 | 2.501421 | 0.01237  | 0.028422 | 795.2407 | 916.9148 | 772.9576 | 1066.957 | 966.878  | 1051.209 |
| 8102  | ANKMY2    | 2656.315 | 0.312306 | 0.092395 | 3.380132 | 0.000725 | 0.002377 | 2398.732 | 2326.5   | 2388.446 | 2787.927 | 2969.086 | 3067.197 |
| 12771 | LOC119620 | 5029.889 | 0.312271 | 0.139013 | 2.246337 | 0.024682 | 0.051381 | 3731.78  | 5474.666 | 4232.83  | 5966.475 | 5664.365 | 5089.216 |
| 12031 | PHAX      | 3373.879 | 0.312261 | 0.130059 | 2.400914 | 0.016354 | 0.036135 | 2755.425 | 3629.888 | 2645.171 | 3582.564 | 3835.425 | 3794.802 |
| 24232 | ZNF679    | 9.290512 | 0.3122   | 0.844172 | 0.36983  | 0.711509 | 0.780599 | 7.047123 | 12.04306 | 5.565851 | 15.62489 | 6.417332 | 9.044815 |
| 8019  | PDI4A     | 36917.54 | 0.312033 | 0.091594 | 3.406683 | 0.000658 | 0.00218  | 33193.57 | 33859.61 | 31775.44 | 40620.25 | 37731.77 | 44324.62 |
| 22750 | LOC103221 | 23.94189 | 0.311992 | 0.519453 | 0.600617 | 0.548095 | 0.64046  | 26.56223 | 19.15941 | 18.78475 | 22.32127 | 25.66933 | 31.15436 |
| 16191 | LDB3      | 210.2791 | 0.311597 | 0.191387 | 1.628097 | 0.103504 | 0.16995  | 197.8615 | 187.2148 | 178.803  | 207.5878 | 245.9977 | 244.21   |
| 23399 | REM2      | 24.36154 | 0.311569 | 0.624234 | 0.499121 | 0.617694 | 0.701799 | 23.8518  | 8.758589 | 32.00364 | 31.24978 | 34.22577 | 16.07967 |
| 11708 | GZF1      | 1813.782 | 0.311554 | 0.126135 | 2.469997 | 0.013511 | 0.03068  | 1468.512 | 1895.14  | 1493.735 | 1977.665 | 1957.286 | 2090.357 |
| 14634 | HOXC5     | 310.9362 | 0.311499 | 0.163887 | 1.900687 | 0.057343 | 0.104173 | 267.2486 | 297.2446 | 269.248  | 348.2118 | 320.8666 | 362.7976 |
| 16274 | FAM83H    | 475.8542 | 0.311195 | 0.192931 | 1.612989 | 0.106747 | 0.17438  | 472.6993 | 330.6367 | 473.7931 | 551.3354 | 425.683  | 600.9777 |
| 24091 | LOC119618 | 10.22771 | 0.310616 | 0.793148 | 0.391625 | 0.695335 | 0.767313 | 8.673382 | 6.568942 | 12.52316 | 6.696381 | 12.83466 | 14.06971 |
| 15856 | LOC103221 | 320.3213 | 0.310609 | 0.183808 | 1.689857 | 0.091055 | 0.152668 | 294.895  | 234.8397 | 328.3852 | 377.2295 | 335.8404 | 350.7378 |
| 15447 | TAB3      | 583.5214 | 0.310541 | 0.177229 | 1.752202 | 0.079739 | 0.137235 | 425.5378 | 660.1786 | 477.2717 | 629.4598 | 652.4288 | 656.2516 |
| 23772 | LOC119624 | 15.43263 | 0.310517 | 0.703885 | 0.441147 | 0.659107 | 0.737082 | 6.505036 | 18.06459 | 16.69755 | 24.5534  | 10.69555 | 16.07967 |
| 11743 | SSBP2     | 856.5717 | 0.310464 | 0.126221 | 2.459694 | 0.013906 | 0.031481 | 740.49   | 848.4883 | 703.3844 | 955.3503 | 971.1562 | 920.5612 |
| 24206 | LOC119618 | 8.913989 | 0.310429 | 0.831387 | 0.373387 | 0.70886  | 0.778528 | 7.047123 | 8.758589 | 7.653045 | 11.16063 | 12.83466 | 6.029877 |
| 21914 | LOC103220 | 38.54771 | 0.310301 | 0.418128 | 0.742119 | 0.458015 | 0.555642 | 37.40396 | 31.74989 | 33.39511 | 37.94616 | 55.61688 | 35.17428 |
| 11923 | PDCL      | 1349.825 | 0.310231 | 0.128199 | 2.419921 | 0.015524 | 0.034614 | 1082.004 | 1398.09  | 1136.825 | 1446.418 | 1490.96  | 1544.653 |
| 14174 | MAP3K21   | 321.0273 | 0.310008 | 0.156433 | 1.981726 | 0.04751  | 0.089104 | 278.0903 | 292.8653 | 289.4243 | 361.6046 | 344.3968 | 359.7826 |
| 18712 | LOC103220 | 113.92   | 0.309928 | 0.252544 | 1.227224 | 0.219738 | 0.312237 | 95.4072  | 104.0082 | 105.7512 | 107.1421 | 147.5986 | 123.6125 |
| 13559 | TGIF2     | 452.0134 | 0.309319 | 0.14748  | 2.097365 | 0.035961 |          |          |          |          |          |          |          |



|       |           |          |          |          |          |          |          |          |          |          |          |          |          |
|-------|-----------|----------|----------|----------|----------|----------|----------|----------|----------|----------|----------|----------|----------|
| 23591 | LOC119621 | 15.28906 | 0.30909  | 0.657794 | 0.469888 | 0.638435 | 0.71946  | 11.9259  | 18.06459 | 10.43597 | 17.85702 | 21.39111 | 12.05975 |
| 23099 | WSCD2     | 22.56456 | 0.309074 | 0.567367 | 0.544752 | 0.585924 | 0.674349 | 18.97302 | 21.34906 | 19.48048 | 17.85702 | 40.6431  | 17.08465 |
| 11016 | TBC1D17   | 885.479  | 0.309004 | 0.117687 | 2.625643 | 0.008649 | 0.020872 | 799.0353 | 816.7384 | 759.7387 | 988.8323 | 913.4003 | 1035.129 |
| 25064 | RERG      | 4.729032 | 0.308982 | 1.311209 | 0.235647 | 0.813707 | 0.863086 | 3.794605 | 7.116354 | 1.391463 | 2.232127 | 12.83466 | 1.004979 |
| 8530  | DERL2     | 2122.393 | 0.308652 | 0.095082 | 3.246159 | 0.00117  | 0.003646 | 1955.306 | 1893.497 | 1842.992 | 2276.77  | 2316.657 | 2449.135 |
| 16650 | GATD1     | 1404.428 | 0.30863  | 0.199321 | 1.548408 | 0.121524 | 0.194027 | 1540.067 | 814.0014 | 1413.03  | 1497.757 | 1398.978 | 1762.734 |
| 11692 | KDINS220  | 6085.774 | 0.308628 | 0.124796 | 2.473052 | 0.013396 | 0.030461 | 4981.774 | 6435.373 | 4897.253 | 6781.202 | 6201.282 | 7217.763 |
| 15005 | COX7B     | 2226.767 | 0.308608 | 0.168409 | 1.83249  | 0.066879 | 0.118492 | 2098.416 | 1449.546 | 2418.362 | 2674.088 | 2543.403 | 2176.786 |
| 11867 | ARMCX5    | 831.421  | 0.308462 | 0.12677  | 2.433243 | 0.014964 | 0.033526 | 690.618  | 821.6651 | 717.9948 | 881.6902 | 919.8176 | 956.7405 |
| 9917  | VAV2      | 2717.631 | 0.308458 | 0.107073 | 2.880808 | 0.003967 | 0.010633 | 2343.981 | 2624.292 | 2321.656 | 2917.39  | 2817.209 | 3281.258 |
| 25146 | LOC119621 | 2.868049 | 0.308152 | 1.38637  | 0.222273 | 0.824102 | 0.871227 | 2.710432 | 2.189647 | 2.782925 | 2.232127 | 4.278221 | 3.014938 |
| 8251  | ZN746     | 2921.068 | 0.307864 | 0.092475 | 3.329148 | 0.000871 | 0.002807 | 2619.903 | 2595.827 | 2619.429 | 3296.852 | 3024.702 | 3369.696 |
| 17046 | LOC119621 | 328.7675 | 0.307575 | 0.206847 | 1.486969 | 0.137023 | 0.213702 | 262.9119 | 377.7142 | 240.0273 | 337.0512 | 402.1528 | 352.7478 |
| 24663 | LOC103231 | 6.346939 | 0.307526 | 1.00504  | 0.305984 | 0.759617 | 0.818814 | 4.878777 | 4.926706 | 6.957314 | 4.464254 | 12.83466 | 4.019918 |
| 18096 | VWA5B2    | 161.7603 | 0.307517 | 0.232516 | 1.322562 | 0.185981 | 0.273214 | 144.7371 | 137.9478 | 152.3652 | 133.9276 | 209.6328 | 191.9511 |
| 9921  | PSEN2     | 1417.502 | 0.307303 | 0.106715 | 2.879669 | 0.003981 | 0.010668 | 1250.593 | 1303.935 | 1251.621 | 1479.9   | 1531.603 | 1687.361 |
| 14086 | FAM3C     | 868.4161 | 0.307059 | 0.153761 | 1.99699  | 0.045826 | 0.086483 | 659.177  | 947.0224 | 723.5606 | 950.8861 | 936.9305 | 992.9197 |
| 10094 | SLC38A6   | 993.9649 | 0.306951 | 0.10808  | 2.840025 | 0.004511 | 0.011881 | 905.2842 | 887.3546 | 873.8386 | 1069.189 | 1116.616 | 1111.507 |
| 24499 | LOC119621 | 7.369304 | 0.30692  | 0.927718 | 0.330833 | 0.74077  | 0.803812 | 7.589209 | 3.284471 | 9.044508 | 6.696381 | 8.556443 | 9.044815 |
| 16530 | CIART     | 299.974  | 0.306899 | 0.195471 | 1.570046 | 0.116404 | 0.187212 | 272.6694 | 319.1411 | 211.5023 | 334.819  | 340.1186 | 321.5934 |
| 16148 | NDUFA11   | 3559.899 | 0.306811 | 0.187355 | 1.637589 | 0.101507 | 0.167115 | 3586.443 | 2035.825 | 3926.708 | 4111.578 | 3773.391 | 3925.45  |
| 10595 | DEAF1     | 1359.163 | 0.306507 | 0.112571 | 2.722785 | 0.006473 | 0.01624  | 1283.118 | 1184.052 | 1182.048 | 1537.935 | 1366.892 | 1600.932 |
| 24090 | LOC119621 | 11.1291  | 0.306505 | 0.782729 | 0.391585 | 0.695365 | 0.767313 | 12.46799 | 9.306001 | 8.348776 | 4.464254 | 17.11289 | 15.07469 |
| 10276 | MAP4K3    | 1824.597 | 0.306339 | 0.10963  | 2.794305 | 0.005201 | 0.013456 | 1604.576 | 1777.446 | 1509.737 | 1982.129 | 2139.111 | 1934.585 |
| 23990 | LOC103241 | 11.18229 | 0.306281 | 0.750619 | 0.408038 | 0.683246 | 0.757175 | 9.215468 | 9.306001 | 11.82743 | 6.696381 | 14.97377 | 15.07469 |
| 22420 | LOC103221 | 32.28175 | 0.306178 | 0.468717 | 0.653226 | 0.513611 | 0.609025 | 32.52518 | 35.03436 | 18.78475 | 37.94616 | 34.22577 | 35.17428 |
| 15640 | PKD1      | 2391.735 | 0.306053 | 0.177249 | 1.72668  | 0.084225 | 0.143167 | 2480.587 | 1499.908 | 2439.93  | 2647.303 | 2288.848 | 2993.834 |
| 21434 | FAM13C    | 49.43284 | 0.306049 | 0.376158 | 0.813618 | 0.415864 | 0.515834 | 40.65648 | 39.96106 | 51.48412 | 69.19594 | 47.06043 | 48.23901 |
| 18000 | KDM8      | 130.2648 | 0.305961 | 0.227897 | 1.34254  | 0.179421 | 0.264995 | 113.2961 | 114.9565 | 121.753  | 138.3919 | 145.4595 | 147.732  |
| 25120 | LOC119621 | 3.872807 | 0.3058   | 1.343191 | 0.227667 | 0.819905 | 0.867722 | 3.794605 | 0.547412 | 6.261582 | 4.464254 | 2.139111 | 6.029877 |
| 8995  | LAMTOR3   | 3077.212 | 0.305637 | 0.098031 | 3.117772 | 0.001822 | 0.005386 | 2745.125 | 2634.693 | 2873.371 | 3392.833 | 3636.488 | 3180.76  |
| 22732 | LOC119611 | 39.19001 | 0.305605 | 0.50606  | 0.603891 | 0.545916 | 0.638447 | 44.45108 | 22.9913  | 36.17803 | 55.80317 | 55.61688 | 20.09959 |
| 18284 | LOC103231 | 126.4766 | 0.305541 | 0.237457 | 1.286721 | 0.198192 | 0.288171 | 120.8853 | 113.8617 | 105.7512 | 138.3919 | 126.2075 | 153.7619 |
| 24713 | GPR139    | 5.780298 | 0.305394 | 1.030872 | 0.296248 | 0.76704  | 0.825143 | 4.878777 | 5.474118 | 4.87012  | 11.16063 | 4.278221 | 4.019918 |
| 7289  | LOC103231 | 3567.648 | 0.305301 | 0.083918 | 3.638103 | 0.000275 | 0.001002 | 3215.114 | 3196.885 | 3161.403 | 3991.043 | 3938.103 | 3903.34  |
| 21705 | LOC119621 | 51.21828 | 0.3053   | 0.392971 | 0.776903 | 0.437216 | 0.535517 | 45.53526 | 56.38342 | 34.09084 | 69.19594 | 59.8951  | 42.20914 |
| 15592 | LOC119621 | 318.7699 | 0.305115 | 0.176245 | 1.7312   | 0.083416 | 0.142228 | 294.3529 | 268.2318 | 297.0773 | 312.4978 | 329.423  | 411.0366 |
| 20752 | NUGGC     | 72.07    | 0.305097 | 0.33512  | 0.910412 | 0.362605 | 0.464437 | 69.38706 | 70.61612 | 51.48412 | 98.21359 | 83.42532 | 59.29379 |
| 7013  | ACAT2     | 10029.22 | 0.305026 | 0.081807 | 3.728609 | 0.000193 | 0.00073  | 9200.29  | 8536.34  | 9182.958 | 11169.56 | 10947.97 | 11138.19 |
| 13957 | TMED9     | 7952.54  | 0.304867 | 0.15093  | 2.019925 | 0.043391 | 0.082651 | 8363.851 | 5367.92  | 7618.259 | 8562.439 | 8032.361 | 9770.41  |
| 15509 | RAB5IF    | 344.6061 | 0.304773 | 0.174945 | 1.742105 | 0.08149  | 0.139688 | 284.5953 | 332.279  | 304.7303 | 444.1933 | 372.2053 | 329.6333 |
| 10415 | ACAT1     | 2779.572 | 0.304586 | 0.110237 | 2.763005 | 0.005727 | 0.014619 | 2335.85  | 2802.201 | 2323.743 | 3169.62  | 2930.582 | 3115.436 |
| 24924 | LOC119621 | 6.726634 | 0.30454  | 1.170425 | 0.260196 | 0.794712 | 0.847674 | 1.626259 | 4.926706 | 11.1317  | 6.696381 | 14.97377 | 1.004979 |
| 15954 | PRDM2     | 898.9896 | 0.304528 | 0.181839 | 1.674713 | 0.093991 | 0.156622 | 647.2511 | 1066.906 | 698.5143 | 953.1182 | 1050.303 | 977.845  |
| 12162 | SLC22A23  | 1173.939 | 0.304359 | 0.128238 | 2.373379 | 0.017626 | 0.038531 | 1055.442 | 1047.746 | 1055.424 | 1131.688 | 1259.936 | 1493.399 |
| 17946 | ACCS      | 356.3705 | 0.304226 | 0.225089 | 1.351582 | 0.176509 | 0.261464 | 379.4605 | 217.3225 | 362.476  | 372.7652 | 352.9533 | 453.2457 |
| 25023 | LOC103231 | 8.329389 | 0.304116 | 1.258593 | 0.241632 | 0.809066 | 0.85957  | 3.794605 | 1.642235 | 4.87012  | 2.232127 | 6.417332 | 4.019918 |
| 13155 | ANKRD39   | 1051.397 | 0.303892 | 0.139417 | 2.179739 | 0.029277 | 0.059166 | 977.9238 | 797.579  | 1051.946 | 1100.439 | 1110.198 | 1270.294 |
| 9867  | SPATA13   | 3021.342 | 0.303823 | 0.105129 | 2.890014 | 0.003852 | 0.010379 | 2597.678 | 2983.394 | 2535.245 | 3227.656 | 3253.587 | 3530.493 |
| 10067 | RSC1A1    | 4128.262 | 0.30369  | 0.10667  | 2.846997 | 0.004413 | 0.011655 | 3554.46  | 4094.093 | 3441.783 | 4352.648 | 4417.264 | 4909.325 |
| 18368 | LOC103231 | 146.0411 | 0.303657 | 0.239138 | 1.2698   | 0.204156 | 0.295486 | 147.9896 | 111.1246 | 134.9719 | 151.7846 | 145.4595 | 184.9162 |
| 8286  | TMCO3     | 3367.135 | 0.303571 | 0.09151  | 3.317357 | 0.000909 | 0.002916 | 3134.885 | 2916.61  | 2995.124 | 3671.849 | 3583.01  | 3901.33  |
| 13952 | PIGT      | 2876.386 | 0.303468 | 0.150099 | 2.021789 | 0.043198 | 0.082314 | 2142.325 | 3276.807 | 2305.654 | 3232.12  | 3082.458 | 3218.949 |
| 8231  | GCLM      | 7229.669 | 0.303407 | 0.090916 | 3.337212 | 0.000846 | 0.002733 | 6428.602 | 6908.885 | 6082.084 | 7776.73  | 7865.51  | 8316.205 |
| 19484 | TIGD6     | 126.1813 | 0.303345 | 0.274918 | 1.103403 | 0.269852 | 0.368201 | 104.6227 | 147.2538 | 86.96642 | 147.3204 | 126.5075 | 144.717  |
| 11053 | ZFYVE21   | 1103.253 | 0.303218 | 0.115941 | 2.615274 | 0.008916 | 0.021446 | 1040.264 | 912.5355 | 1013.681 | 1203.116 | 1161.537 | 1288.384 |
| 24111 | LOC103241 | 11.12914 | 0.303189 | 0.779869 | 0.388769 | 0.697447 | 0.769011 | 10.29964 | 8.211177 | 11.1317  | 6.696381 | 21.39111 | 9.044815 |
| 19156 | QRICH2    | 96.34622 | 0.30314  | 0.261477 | 1.15934  | 0.246317 | 0.341843 | 90.52842 | 84.84883 | 83.48776 | 100.4457 | 111.2338 | 107.5328 |
| 16532 | TIGD7     | 348.2052 | 0.303131 | 0.193139 | 1.569495 | 0.116533 | 0.187395 | 277.5482 | 390.3046 | 265.7694 | 388.3901 | 406.431  | 360.7876 |
| 13943 | TPRN      | 594.8896 | 0.303061 | 0.149679 | 2.024741 | 0.042894 | 0.081786 | 589.2479 | 476.7957 | 534.3217 | 683.0309 | 575.4208 | 710.5205 |
| 11143 | PANK2     | 1155.433 | 0.302956 | 0.116827 | 2.593201 | 0.009509 | 0.022686 | 1084.173 | 996.2895 | 1026.204 | 1323.651 | 1146.563 | 1355.717 |
| 11256 | DGKZ      | 2524.778 | 0.302921 | 0.117912 | 2.569039 | 0.010198 | 0.024086 | 2279.473 | 2085.639 | 2423.928 | 2729.891 | 2494.203 | 3135.536 |
| 8932  | LOC103211 | 2769.01  | 0.302736 | 0.096513 | 3.136756 | 0.001708 | 0.005084 | 2575.994 | 2503.314 | 2359.921 | 2874.98  | 3206.527 | 3093.327 |
| 23602 | TRNAQ-CU  | 15.75204 | 0.302675 | 0.6465   | 0.468175 | 0.63966  | 0.720507 | 10.84173 | 13.6853  | 17.39328 | 24.5534  | 14.97377 | 13.06473 |
| 14787 | GPX1      | 7831.752 | 0.30267  | 0.161351 | 1.87585  | 0.060676 | 0.109087 | 7958.37  | 4916.306 | 8165.799 | 8950.829 | 8289.054 | 8710.157 |
| 9513  | NBFB2     | 1768.484 | 0.30229  | 0.101426 | 2.980393 | 0.002879 | 0.008045 | 1516.758 | 1699.166 | 1534.783 | 1962.04  | 1961.564 | 1936.595 |
| 9645  | ZMAT3     | 5301.088 | 0.302202 | 0.102479 | 2.948918 | 0.003189 | 0.00879  | 4487.391 | 5272.123 | 4487.467 | 5633.888 | 5752.069 | 6173.589 |
| 9704  | MCUB      | 1746.481 | 0.301719 | 0.103047 | 2.927984 | 0.003412 | 0.009347 | 1594.276 | 1489.508 | 1605.748 | 1959.807 | 2023.599 | 1805.948 |
| 19687 | LOC119621 | 89.27821 | 0.301708 | 0.28149  | 1.071824 | 0.283799 | 0.383238 | 71.5554  | 83.2066  | 84.87923 | 87.05295 | 115.512  | 93.46309 |
| 11325 | IFFO2     | 1407.215 | 0.301492 | 0.118148 | 2.551818 | 0.010716 | 0.025156 | 11       |          |          |          |          |          |



|       |           |          |          |          |          |          |          |           |          |          |          |          |          |
|-------|-----------|----------|----------|----------|----------|----------|----------|-----------|----------|----------|----------|----------|----------|
| 21403 | ABCA4     | 48.96681 | 0.300654 | 0.36866  | 0.815533 | 0.414767 | 0.514935 | 49.32986  | 37.77142 | 44.52681 | 46.87467 | 62.03421 | 53.26391 |
| 21389 | HAPLN4    | 59.78854 | 0.300601 | 0.367515 | 0.817927 | 0.413399 | 0.513804 | 45.53526  | 59.66789 | 54.26705 | 58.0353  | 91.98176 | 49.24399 |
| 9060  | DSTYK     | 2327.95  | 0.300468 | 0.097167 | 3.092295 | 0.001986 | 0.005827 | 2220.386  | 2029.803 | 2010.664 | 2578.107 | 2485.647 | 2643.096 |
| 13979 | DAGLB     | 801.1051 | 0.300209 | 0.148923 | 2.01587  | 0.043814 | 0.083324 | 787.1094  | 674.9588 | 697.8186 | 830.3512 | 772.219  | 1044.174 |
| 11426 | MAGED2    | 6932.854 | 0.30018  | 0.118623 | 2.530546 | 0.011389 | 0.026498 | 6894.797  | 5349.856 | 6403.512 | 7254.413 | 7253.724 | 8440.823 |
| 12452 | HECTD3    | 803.3855 | 0.299913 | 0.129809 | 2.310426 | 0.020865 | 0.044546 | 712.3015  | 799.2212 | 649.1174 | 899.5472 | 855.6443 | 904.4815 |
| 21760 | CHIT1     | 48.99199 | 0.299889 | 0.391128 | 0.766729 | 0.443243 | 0.541509 | 55.29281  | 37.224   | 40.35242 | 42.41041 | 51.33866 | 67.33362 |
| 16601 | LOC119618 | 783.8782 | 0.299661 | 0.192459 | 1.55701  | 0.119468 | 0.191317 | 872.217   | 504.1663 | 734.6923 | 841.5119 | 765.8016 | 984.8799 |
| 14233 | PIGM      | 412.6291 | 0.299634 | 0.15211  | 1.969857 | 0.048855 | 0.091253 | 361.0295  | 407.2744 | 342.2998 | 457.586  | 434.2395 | 473.3453 |
| 9005  | DENND1B   | 1813.075 | 0.299549 | 0.096173 | 3.114696 | 0.001841 | 0.005436 | 1650.653  | 1647.71  | 1580.702 | 1970.968 | 1955.147 | 2073.273 |
| 8759  | ACO2      | 16557.37 | 0.299366 | 0.093976 | 3.185549 | 0.001445 | 0.004385 | 15535.11  | 14409.52 | 14599.23 | 17999.87 | 16913.95 | 19886.53 |
| 11730 | IRAK3     | 1759.618 | 0.299246 | 0.121445 | 2.464052 | 0.013738 | 0.031135 | 1100.977  | 1335.137 | 1115.953 | 1412.936 | 1416.091 | 1536.614 |
| 16690 | LOC103234 | 628.5284 | 0.298977 | 0.19357  | 1.544537 | 0.122458 | 0.195068 | 626.1098  | 390.3046 | 675.5552 | 683.0309 | 686.6545 | 709.5155 |
| 13215 | CSPP1     | 1081.461 | 0.298922 | 0.13805  | 2.165323 | 0.030363 | 0.06108  | 950.8195  | 1128.763 | 827.9203 | 1178.563 | 1244.962 | 1157.736 |
| 21006 | LOC119620 | 57.32831 | 0.298863 | 0.340343 | 0.878122 | 0.379877 | 0.480632 | 49.32986  | 49.26706 | 54.96278 | 60.26743 | 74.86887 | 55.27387 |
| 14439 | FBXL18    | 574.6838 | 0.298816 | 0.15429  | 1.93672  | 0.05278  | 0.097177 | 563.2277  | 440.1191 | 544.7577 | 662.9417 | 564.7252 | 672.3313 |
| 25834 | LOC103215 | 0.977731 | 0.298686 | 2.618256 | 0.114078 | 0.909176 | 0.935533 | 0.542086  | 0        | 2.087194 | 2.232127 | 0        | 1.004979 |
| 25835 | LOC119621 | 0.977731 | 0.298686 | 2.618256 | 0.114078 | 0.909176 | 0.935533 | 0.542086  | 0        | 2.087194 | 2.232127 | 0        | 1.004979 |
| 14864 | TIMM8B    | 1348.196 | 0.298675 | 0.160581 | 1.859964 | 0.062891 | 0.112476 | 1278.782  | 907.0614 | 1441.555 | 1551.328 | 1465.291 | 1445.16  |
| 25216 | LOC119625 | 3.871283 | 0.298461 | 1.409791 | 0.211706 | 0.832337 | 0.877543 | 2.710432  | 3.831883 | 3.478657 | 8.928508 | 4.278221 | 0        |
| 24406 | LOC103240 | 10.84304 | 0.298204 | 0.861989 | 0.345949 | 0.729381 | 0.794501 | 4.336691  | 15.32753 | 9.044508 | 8.928508 | 21.39111 | 6.029877 |
| 11572 | DDRGR1    | 1302.985 | 0.297529 | 0.11896  | 2.501083 | 0.012381 | 0.028445 | 1134.045  | 1298.461 | 1076.992 | 1421.865 | 1369.031 | 1517.519 |
| 22299 | LOC103243 | 39.06121 | 0.297439 | 0.440711 | 0.674906 | 0.499735 | 0.595787 | 41.19856  | 27.37059 | 35.4823  | 42.41041 | 57.75599 | 30.14938 |
| 22381 | MEX3B     | 33.26907 | 0.297383 | 0.449728 | 0.66125  | 0.508452 | 0.603959 | 34.69353  | 30.10765 | 25.04633 | 26.78552 | 42.78221 | 40.19918 |
| 21991 | LOC119624 | 46.47622 | 0.297379 | 0.407828 | 0.729177 | 0.465894 | 0.563221 | 35.7777   | 39.41365 | 48.7012  | 51.33892 | 68.45154 | 35.17428 |
| 11196 | DAZAP2    | 5852.672 | 0.297356 | 0.11513  | 2.582776 | 0.009801 | 0.023272 | 4859.262  | 6143.055 | 4751.845 | 6428.526 | 6479.366 | 6453.978 |
| 14645 | PATL1     | 1255.986 | 0.297114 | 0.156555 | 1.897826 | 0.057719 | 0.104777 | 982.2605  | 1426.008 | 971.9367 | 1392.847 | 1401.117 | 1361.747 |
| 11390 | XPO7      | 4498.425 | 0.297082 | 0.117005 | 2.53906  | 0.011115 | 0.025943 | 3794.062  | 4664.496 | 3654.677 | 4924.072 | 4676.096 | 5277.147 |
| 25641 | LOC119625 | 1.302091 | 0.297044 | 2.067684 | 0.14366  | 0.885769 | 0.918343 | 1.084173  | 1.094824 | 1.391463 | 2.232127 | 0        | 2.009959 |
| 22843 | UMODL1    | 26.97439 | 0.296653 | 0.505854 | 0.58644  | 0.55758  | 0.648919 | 18.97302  | 22.44388 | 30.61218 | 33.4819  | 34.22577 | 22.10955 |
| 9946  | IFNAR2    | 3287.995 | 0.296612 | 0.103124 | 2.87627  | 0.004024 | 0.010757 | 2887.152  | 3265.859 | 2699.438 | 3631.671 | 3627.932 | 3615.916 |
| 13488 | OAZ2      | 915.8588 | 0.296573 | 0.14061  | 2.109192 | 0.034928 | 0.068844 | 811.5033  | 740.6482 | 919.7569 | 937.4933 | 939.0696 | 1146.682 |
| 24832 | NPAS1     | 5.103566 | 0.296553 | 1.073626 | 0.276216 | 0.782382 | 0.837623 | 4.878777  | 3.831883 | 4.87012  | 4.464254 | 8.556443 | 4.019918 |
| 24263 | LOC103230 | 10.19607 | 0.296534 | 0.80843  | 0.366802 | 0.713767 | 0.782075 | 9.7407123 | 10.40082 | 9.740239 | 6.696381 | 19.252   | 8.039836 |
| 22132 | LOC103231 | 40.65875 | 0.296483 | 0.421488 | 0.703419 | 0.481795 | 0.578733 | 42.28274  | 33.39212 | 34.78657 | 29.01765 | 49.19955 | 55.27387 |
| 12729 | MARK4     | 839.8895 | 0.296473 | 0.131662 | 2.251777 | 0.024336 | 0.050823 | 698.2072  | 840.2771 | 726.3436 | 874.9938 | 900.5656 | 998.9496 |
| 9807  | APOBEC3G  | 1919.479 | 0.296338 | 0.102068 | 2.90333  | 0.003692 | 0.010008 | 1725.461  | 1740.77  | 1708.716 | 2037.932 | 2008.625 | 2295.373 |
| 11007 | KATNAL1   | 1240.821 | 0.296042 | 0.112657 | 2.627811 | 0.008594 | 0.020756 | 1193.132  | 1063.074 | 1088.124 | 1274.545 | 1398.978 | 1427.071 |
| 18272 | LACC1     | 225.5467 | 0.296025 | 0.229564 | 1.28951  | 0.197221 | 0.286948 | 160.9997  | 262.7577 | 182.9774 | 238.8376 | 269.5279 | 238.1801 |
| 25274 | GUCA1C    | 3.909731 | 0.295979 | 1.457981 | 0.203006 | 0.83913  | 0.882622 | 3.794605  | 2.189647 | 4.174388 | 1.16063  | 2.139111 | 0        |
| 14020 | MIDN      | 670.7449 | 0.295891 | 0.147225 | 2.009785 | 0.044454 | 0.084294 | 525.2817  | 643.2089 | 642.1601 | 723.2091 | 669.5416 | 821.0682 |
| 13297 | PRKAB2    | 563.1573 | 0.295794 | 0.137696 | 2.148165 | 0.031701 | 0.06338  | 516.6083  | 543.0325 | 455.704  | 638.3883 | 618.203  | 607.0076 |
| 20233 | ATXN7L1   | 111.3148 | 0.295671 | 0.298648 | 0.990032 | 0.322158 | 0.423297 | 94.32303  | 129.1892 | 76.53045 | 93.74933 | 145.4595 | 128.6374 |
| 23671 | LOC103215 | 17.20259 | 0.295639 | 0.644455 | 0.458744 | 0.646418 | 0.726022 | 16.80468  | 15.87494 | 13.2189  | 11.16063 | 32.08666 | 14.06971 |
| 15679 | LOC103220 | 267.4326 | 0.295621 | 0.171755 | 1.721181 | 0.085218 | 0.144494 | 222.7975  | 251.262  | 245.5932 | 294.6408 | 305.8928 | 284.4092 |
| 24043 | SEMA3D    | 19.66237 | 0.295469 | 0.738277 | 0.400215 | 0.688998 | 0.761844 | 9.215468  | 24.63353 | 18.08902 | 26.78552 | 34.22577 | 5.024897 |
| 11064 | SGSH      | 1131.966 | 0.295308 | 0.113027 | 2.612713 | 0.008983 | 0.021584 | 1034.843  | 988.0783 | 1030.378 | 1265.616 | 1142.285 | 1330.593 |
| 23989 | LOC119620 | 14.08231 | 0.295201 | 0.723514 | 0.408011 | 0.683266 | 0.757175 | 15.7205   | 7.663765 | 13.91463 | 15.62489 | 23.53022 | 8.039836 |
| 11844 | TMEM254   | 1151.556 | 0.295111 | 0.121009 | 2.438761 | 0.014738 | 0.033082 | 1006.112  | 1084.423 | 1017.855 | 1209.813 | 1170.094 | 1421.041 |
| 16128 | RGS7      | 318.6291 | 0.294959 | 0.179793 | 1.640548 | 0.100891 | 0.166307 | 269.4169  | 332.8264 | 253.942  | 366.0688 | 367.927  | 321.5934 |
| 18190 | THAP8     | 132.4103 | 0.294895 | 0.226332 | 1.302933 | 0.192598 | 0.281497 | 117.0907  | 117.1461 | 122.4487 | 154.0168 | 139.0422 | 144.717  |
| 23510 | LOC103215 | 17.04607 | 0.294752 | 0.612002 | 0.48162  | 0.630076 | 0.712457 | 13.01007  | 13.13788 | 19.48048 | 22.32127 | 19.252   | 15.07469 |
| 23002 | LOC103244 | 23.05102 | 0.294679 | 0.523758 | 0.562625 | 0.57369  | 0.663053 | 21.68345  | 19.70683 | 20.17621 | 24.5534  | 32.08666 | 20.09959 |
| 15780 | TMEM80    | 390.3486 | 0.294599 | 0.172765 | 1.705201 | 0.088157 | 0.14852  | 399.5177  | 295.6024 | 358.9974 | 419.6399 | 400.0137 | 468.3204 |
| 21549 | PDGFRA    | 51.31469 | 0.29452  | 0.36953  | 0.797014 | 0.425443 | 0.524869 | 42.82482  | 56.93083 | 38.96096 | 49.10679 | 57.75599 | 62.30873 |
| 11290 | GRIK5     | 1006.96  | 0.294517 | 0.115032 | 2.5603   | 0.010458 | 0.024626 | 883.0587  | 971.656  | 860.6197 | 1087.046 | 1086.668 | 1152.711 |
| 11010 | TMEM184   | 3879.176 | 0.294458 | 0.112091 | 2.626951 | 0.008615 | 0.020803 | 3218.909  | 4005.412 | 3230.281 | 4174.077 | 4286.778 | 4359.601 |
| 13384 | SMAP2     | 946.6573 | 0.294457 | 0.138232 | 2.130176 | 0.033157 | 0.065856 | 754.0421  | 985.3413 | 814.0057 | 1026.778 | 988.2691 | 1111.507 |
| 25204 | GPER1     | 3.509797 | 0.294188 | 1.371576 | 0.214489 | 0.830165 | 0.875679 | 3.252518  | 2.189647 | 4.174388 | 0        | 6.417332 | 5.024897 |
| 15167 | IL17RC    | 982.6248 | 0.294135 | 0.163225 | 1.802014 | 0.071543 | 0.125377 | 1032.132  | 689.7389 | 929.4971 | 1082.582 | 966.878  | 1194.921 |
| 25663 | CCDC80    | 1.302978 | 0.294026 | 2.094599 | 0.140373 | 0.888365 | 0.920281 | 0.542086  | 1.642235 | 1.391463 | 2.232127 | 0        | 2.009959 |
| 14425 | FBXL16    | 519.0497 | 0.293996 | 0.151602 | 1.939264 | 0.052469 | 0.0967   | 420.659   | 512.9249 | 468.9229 | 553.5675 | 524.0821 | 634.142  |
| 11155 | EHHADH    | 2238.571 | 0.29382  | 0.113381 | 2.591442 | 0.009557 | 0.022778 | 1913.023  | 2242.199 | 1882.649 | 2412.929 | 2329.492 | 2651.136 |
| 11775 | CDIP1     | 2401.895 | 0.293288 | 0.119521 | 2.453856 | 0.014133 | 0.03191  | 2312.54   | 1911.562 | 2257.648 | 2524.536 | 2468.534 | 2936.55  |
| 9119  | FAM210B   | 1711.954 | 0.293249 | 0.095259 | 3.07843  | 0.002081 | 0.006067 | 1568.256  | 1530.016 | 1518.086 | 1904.004 | 1843.913 | 1907.451 |
| 16327 | FAM229B   | 291.6055 | 0.293245 | 0.183245 | 1.600288 | 0.109535 | 0.178354 | 295.4371  | 223.344  | 265.7694 | 337.0512 | 331.5622 | 296.4689 |
| 24127 | LOC103215 | 10.87093 | 0.292993 | 0.7588   | 0.386127 | 0.699403 | 0.770624 | 9.215468  | 10.40082 | 9.740239 | 6.696381 | 17.11289 | 12.05975 |
| 11139 | MAVS      | 2971.099 | 0.29296  | 0.112918 | 2.59445  | 0.009474 | 0.022612 | 2473.54   | 3021.166 | 2519.243 | 3281.227 | 3080.319 | 3451.099 |
| 12278 | VHL       | 1072.106 | 0.292937 | 0.124669 | 2.349709 | 0.018788 | 0.040681 | 989.3076  | 1054.315 | 846.0093 | 1151.778 | 1221.432 | 1169.796 |
| 8602  | LOC119620 | 7152.984 | 0.292901 | 0.09072  | 3.228634 | 0.001244 | 0.003844 | 6732.713  | 6544.308 | 6014.598 |          |          |          |



|       |           |          |          |          |          |          |          |          |          |          |          |          |          |
|-------|-----------|----------|----------|----------|----------|----------|----------|----------|----------|----------|----------|----------|----------|
| 12837 | ATP1B3    | 2322.547 | 0.292486 | 0.131079 | 2.231369 | 0.025657 | 0.053134 | 2330.971 | 1750.076 | 2187.379 | 2428.554 | 2419.334 | 2818.967 |
| 10396 | ADD3      | 4078.529 | 0.292483 | 0.105704 | 2.767014 | 0.005657 | 0.014467 | 3499.71  | 4124.201 | 3375.689 | 4549.075 | 4365.925 | 4556.577 |
| 17130 | MTRES1    | 861.2355 | 0.292279 | 0.197989 | 1.476237 | 0.13988  | 0.217077 | 611.4734 | 1065.263 | 644.2472 | 944.1897 | 1028.912 | 873.3272 |
| 20261 | LOC119621 | 82.72936 | 0.292242 | 0.296494 | 0.98566  | 0.3243   | 0.425504 | 76.97626 | 70.61612 | 77.22618 | 89.28508 | 72.72976 | 109.5428 |
| 22376 | LOC103231 | 34.79477 | 0.292242 | 0.441241 | 0.662318 | 0.507768 | 0.60328  | 31.44101 | 25.72836 | 37.56949 | 35.71403 | 32.08666 | 46.22906 |
| 24845 | LOC103241 | 5.466931 | 0.292186 | 1.066364 | 0.274002 | 0.784083 | 0.838962 | 3.252518 | 4.926706 | 6.261582 | 8.928508 | 6.417332 | 3.014938 |
| 25077 | LOC103241 | 3.8572   | 0.292118 | 1.248574 | 0.233961 | 0.815015 | 0.864026 | 2.189647 | 3.794605 | 4.174388 | 6.696381 | 4.278221 | 2.009959 |
| 13588 | UST       | 493.1154 | 0.291866 | 0.139531 | 2.091757 | 0.03646  | 0.071331 | 450.4738 | 470.2267 | 408.3943 | 558.0317 | 536.9168 | 534.6491 |
| 10064 | UFC1      | 2457.675 | 0.291854 | 0.102479 | 2.847929 | 0.0044   | 0.011624 | 2343.981 | 2047.32  | 2241.646 | 2732.123 | 2551.959 | 2829.017 |
| 10431 | MRI1      | 1243.106 | 0.291475 | 0.105588 | 2.76049  | 0.005771 | 0.014709 | 1132.418 | 1152.849 | 1070.731 | 1341.508 | 1339.083 | 1422.046 |
| 10855 | PLEKHH1   | 1311.552 | 0.291447 | 0.109575 | 2.659803 | 0.007819 | 0.019149 | 1244.63  | 1149.565 | 1147.261 | 1459.811 | 1345.501 | 1522.544 |
| 12680 | CMTM7     | 1296.607 | 0.291374 | 0.128672 | 2.264469 | 0.023545 | 0.049365 | 1125.371 | 1332.948 | 1042.206 | 1334.812 | 1426.787 | 1517.519 |
| 20323 | LOC103241 | 82.49886 | 0.291289 | 0.298892 | 0.974472 | 0.329822 | 0.431448 | 74.26583 | 84.30142 | 62.61582 | 93.74933 | 102.6773 | 77.38342 |
| 10745 | ZNF335    | 1879.466 | 0.290942 | 0.108526 | 2.680866 | 0.007343 | 0.018168 | 1767.202 | 1582.568 | 1727.501 | 1921.861 | 2038.572 | 2239.094 |
| 22662 | CARD9     | 27.3179  | 0.290803 | 0.474284 | 0.613142 | 0.539783 | 0.633279 | 26.02015 | 21.89647 | 25.74206 | 29.01765 | 32.08666 | 29.1444  |
| 16595 | LOC103231 | 507.1132 | 0.290644 | 0.186536 | 1.558106 | 0.119208 | 0.19097  | 494.9249 | 345.9643 | 528.7558 | 611.6028 | 485.5781 | 575.8532 |
| 24745 | SPARCL1   | 7.074225 | 0.290563 | 0.99991  | 0.290589 | 0.771365 | 0.828723 | 7.047123 | 6.568942 | 4.87012  | 13.39276 | 8.556443 | 2.009959 |
| 21070 | LOC119621 | 83.92573 | 0.29054  | 0.333977 | 0.869943 | 0.384332 | 0.484929 | 68.30288 | 96.34448 | 61.22436 | 69.19594 | 124.0684 | 84.41828 |
| 10324 | LOC103211 | 1769.57  | 0.290497 | 0.104384 | 2.782965 | 0.005386 | 0.013871 | 1643.606 | 1567.787 | 1568.874 | 1964.272 | 1792.575 | 2080.308 |
| 10978 | SCAMP3    | 1776.47  | 0.290495 | 0.110283 | 2.634087 | 0.008436 | 0.02043  | 1631.138 | 1550.27  | 1618.967 | 1955.343 | 1760.488 | 2142.616 |
| 22582 | LOC119611 | 50.67469 | 0.290414 | 0.462973 | 0.627281 | 0.530475 | 0.62451  | 69.38706 | 21.89647 | 45.91827 | 44.64254 | 59.8951  | 62.30873 |
| 24672 | LOC103231 | 6.749969 | 0.290357 | 0.953612 | 0.304481 | 0.760761 | 0.819749 | 6.505036 | 3.831883 | 7.653045 | 8.928508 | 8.556443 | 5.024897 |
| 21972 | LOC119621 | 47.17234 | 0.290275 | 0.396636 | 0.731841 | 0.464265 | 0.56169  | 38.48813 | 40.50847 | 48.00546 | 71.42806 | 36.36488 | 48.23901 |
| 22819 | GRM2      | 25.7556  | 0.290213 | 0.492298 | 0.589506 | 0.555522 | 0.647123 | 22.22554 | 21.34906 | 26.43779 | 24.5534  | 27.80844 | 32.15934 |
| 24537 | MAG       | 8.992598 | 0.290185 | 0.893278 | 0.324854 | 0.745292 | 0.807498 | 7.047123 | 4.926706 | 11.82743 | 11.16063 | 14.97377 | 4.019918 |
| 10422 | GABARAPL  | 2981.563 | 0.290183 | 0.105083 | 2.761469 | 0.005754 | 0.014678 | 2531.543 | 2966.972 | 2552.638 | 3176.317 | 3210.805 | 3451.099 |
| 9539  | CCDC50    | 9412.962 | 0.290048 | 0.097517 | 2.974344 | 0.002936 | 0.008183 | 8041.309 | 9434.643 | 7933.425 | 10345.91 | 10316.93 | 10405.56 |
| 23340 | LOC119621 | 24.51097 | 0.289993 | 0.571516 | 0.50741  | 0.611867 | 0.696912 | 13.01007 | 25.18094 | 27.13352 | 35.71403 | 29.94755 | 16.07967 |
| 9637  | NQO2      | 3129.095 | 0.289972 | 0.098242 | 2.951604 | 0.003161 | 0.008721 | 2755.967 | 2977.373 | 2718.222 | 3419.619 | 3232.196 | 3671.19  |
| 8185  | CHURC1    | 4102.403 | 0.289847 | 0.086492 | 3.351147 | 0.000805 | 0.002614 | 3560.423 | 3851.59  | 3661.634 | 4535.682 | 4552.027 | 4453.064 |
| 10604 | DDI2      | 5068.312 | 0.289828 | 0.106515 | 2.720999 | 0.006508 | 0.016317 | 4365.964 | 5092.025 | 4228.655 | 5343.712 | 5411.95  | 5967.568 |
| 23822 | LOC103241 | 14.71815 | 0.289821 | 0.667596 | 0.434126 | 0.664197 | 0.741234 | 17.34676 | 12.59047 | 9.740239 | 11.16063 | 21.39111 | 16.07967 |
| 9975  | UBE2Q2    | 1505.713 | 0.289657 | 0.101003 | 2.867798 | 0.004133 | 0.011016 | 1349.253 | 1389.879 | 1323.281 | 1741.059 | 1627.863 | 1602.942 |
| 16818 | LOC119611 | 342.0574 | 0.289316 | 0.190048 | 1.522331 | 0.127926 | 0.202219 | 378.3763 | 257.2836 | 287.3371 | 359.3724 | 402.1528 | 367.8225 |
| 11264 | GALNT17   | 1630.629 | 0.289272 | 0.112707 | 2.566594 | 0.01027  | 0.02424  | 1405.63  | 1585.852 | 1416.509 | 1709.809 | 1711.289 | 1954.685 |
| 12088 | ETS1      | 12570.36 | 0.289169 | 0.121005 | 2.38973  | 0.016861 | 0.037082 | 10404.81 | 13344.26 | 10198.73 | 13301.24 | 13191.9  | 14981.23 |
| 8878  | CNN3      | 9828.445 | 0.289132 | 0.091836 | 3.148367 | 0.001642 | 0.004915 | 8433.78  | 9642.112 | 8462.181 | 10828.05 | 11044.23 | 10560.32 |
| 15945 | TICAM2    | 312.2473 | 0.289017 | 0.172383 | 1.676601 | 0.09362  | 0.156092 | 267.7907 | 310.3825 | 262.2907 | 370.5331 | 352.9533 | 309.5337 |
| 14496 | PER2      | 474.7627 | 0.288981 | 0.150066 | 1.92569  | 0.054143 | 0.099296 | 412.5277 | 444.4984 | 427.8748 | 544.639  | 449.2132 | 569.8234 |
| 10447 | CYTH3     | 1474.345 | 0.288659 | 0.104743 | 2.75587  | 0.005854 | 0.014896 | 1306.97  | 1364.15  | 1315.628 | 1558.025 | 1569.619 | 1737.61  |
| 22096 | LOC119621 | 46.22545 | 0.288517 | 0.406048 | 0.710549 | 0.477364 | 0.574358 | 47.16151 | 32.84471 | 43.83108 | 46.87467 | 68.45154 | 38.18922 |
| 12079 | KIF3C     | 4368.48  | 0.288502 | 0.120671 | 2.390805 | 0.016811 | 0.037001 | 3641.194 | 4550.634 | 3610.846 | 4823.626 | 4395.872 | 5188.709 |
| 13294 | MSL2      | 2019.271 | 0.288374 | 0.134176 | 2.149214 | 0.031617 | 0.063228 | 1631.68  | 2171.583 | 1653.753 | 2140.61  | 2124.137 | 2393.861 |
| 20330 | LOC119621 | 108.9278 | 0.288327 | 0.296646 | 0.971956 | 0.331073 | 0.432935 | 80.22878 | 129.1892 | 84.87923 | 138.3919 | 96.25998 | 124.6175 |
| 20507 | LOC119621 | 104.3655 | 0.288145 | 0.304985 | 0.944786 | 0.344768 | 0.44696  | 74.26583 | 128.0944 | 78.61764 | 129.4634 | 111.2338 | 104.5179 |
| 22899 | SKOR1     | 28.96546 | 0.288114 | 0.497236 | 0.579432 | 0.562298 | 0.652809 | 20.0572  | 21.89647 | 36.17803 | 29.01765 | 38.50399 | 28.13943 |
| 11100 | ST7       | 978.552  | 0.28808  | 0.110566 | 2.605495 | 0.009174 | 0.021973 | 898.7792 | 897.208  | 848.7923 | 1082.582 | 1037.469 | 1106.482 |
| 12052 | LOC103241 | 5999.96  | 0.28801  | 0.120156 | 2.396973 | 0.016531 | 0.036465 | 4949.791 | 6401.981 | 4858.292 | 6473.168 | 6500.757 | 6815.771 |
| 15065 | FGD4      | 499.9053 | 0.287999 | 0.158051 | 1.822188 | 0.068426 | 0.120751 | 416.8644 | 529.3472 | 402.8285 | 564.7281 | 554.0297 | 531.6341 |
| 20677 | HE57      | 80.1996  | 0.287863 | 0.311122 | 0.924948 | 0.354993 | 0.456424 | 54.20864 | 85.94365 | 76.53045 | 91.51721 | 85.56443 | 87.43321 |
| 11792 | ELMO2     | 1602.55  | 0.28781  | 0.11741  | 2.45133  | 0.014233 | 0.032088 | 1443.576 | 1515.783 | 1376.157 | 1571.417 | 1747.653 | 1960.715 |
| 10002 | MCCC1     | 1469.657 | 0.287711 | 0.100561 | 2.86107  | 0.004222 | 0.011222 | 1354.674 | 1349.918 | 1266.231 | 1638.381 | 1578.664 | 1630.077 |
| 10602 | CREBL2    | 1609.922 | 0.287625 | 0.105692 | 2.721348 | 0.006502 | 0.016303 | 1408.34  | 1560.124 | 1383.81  | 1718.738 | 1743.375 | 1845.142 |
| 11925 | WDR37     | 1235.929 | 0.28742  | 0.11879  | 2.41956  | 0.015539 | 0.034643 | 1194.758 | 1058.147 | 1091.603 | 1247.759 | 1336.944 | 1486.365 |
| 15268 | TMSB4X    | 27581.04 | 0.287186 | 0.160871 | 1.785201 | 0.074229 | 0.129259 | 28457.91 | 17240.74 | 28837.37 | 30124.79 | 29812.79 | 31012.66 |
| 23557 | LOC119621 | 21.0812  | 0.286711 | 0.602985 | 0.475487 | 0.63444  | 0.715986 | 18.97302 | 22.44388 | 15.30609 | 11.16063 | 38.50399 | 20.09959 |
| 15108 | MEF2C     | 1112.978 | 0.286612 | 0.15817  | 1.812056 | 0.069978 | 0.123129 | 840.776  | 1236.603 | 933.6715 | 1191.956 | 1125.172 | 1349.687 |
| 20121 | ZNHIT2    | 112.8896 | 0.286598 | 0.283937 | 1.009369 | 0.312797 | 0.413286 | 91.07051 | 81.56436 | 133.5804 | 127.2312 | 111.2338 | 132.6573 |
| 23955 | XKR9      | 17.12315 | 0.286526 | 0.692223 | 0.413922 | 0.678931 | 0.75347  | 11.9259  | 12.59047 | 20.87194 | 26.78552 | 23.53022 | 7.034856 |
| 10693 | GNAI2     | 14915.06 | 0.286486 | 0.106357 | 2.693632 | 0.007068 | 0.017572 | 12694.04 | 15105.83 | 12520.38 | 16604.79 | 15147.04 | 17418.3  |
| 21174 | LOC103231 | 68.0046  | 0.286447 | 0.335155 | 0.85467  | 0.392734 | 0.493097 | 56.91907 | 67.33165 | 57.7457  | 93.74933 | 77.00798 | 55.27387 |
| 11916 | DDX24     | 6457.647 | 0.28636  | 0.118259 | 2.421461 | 0.015458 | 0.034488 | 5362.86  | 6842.648 | 5252.772 | 6890.576 | 6969.223 | 7427.803 |
| 11268 | WIZ       | 1409.805 | 0.286213 | 0.111541 | 2.565983 | 0.010288 | 0.024276 | 1229.994 | 1258.5   | 1327.455 | 1566.953 | 1409.674 | 1666.256 |
| 23601 | LOC119621 | 17.40524 | 0.286194 | 0.611302 | 0.468172 | 0.639662 | 0.720507 | 10.29964 | 18.612   | 18.08902 | 20.08914 | 19.252   | 18.08963 |
| 24589 | LOC119621 | 7.396913 | 0.286151 | 0.898827 | 0.318361 | 0.750211 | 0.811109 | 8.673382 | 4.926706 | 6.261582 | 8.928508 | 8.556443 | 7.034856 |
| 24219 | LOC103221 | 11.60583 | 0.286039 | 0.771158 | 0.370921 | 0.710696 | 0.780107 | 16.26259 | 5.474118 | 9.740239 | 13.39276 | 10.69555 | 14.06971 |
| 15489 | TM6SF2    | 404.4213 | 0.286004 | 0.163764 | 1.746444 | 0.080734 | 0.13857  | 408.7331 | 336.6583 | 350.6486 | 392.8543 | 449.2132 | 488.42   |
| 17307 | LOC103241 | 185.3796 | 0.285917 | 0.197492 | 1.44774  | 0.14769  | 0.226864 | 177.8043 | 164.771  | 158.6268 | 196.4272 | 209.6328 | 205.0158 |
| 11716 | LOC119611 | 1651.609 | 0.285737 | 0.115767 | 2.468205 | 0.013579 | 0.030813 | 1540.067 | 1464.327 | 1467.993 | 1754.452 | 1640.698 | 2042.118 |



|       |           |          |          |          |          |          |          |          |          |          |          |          |          |
|-------|-----------|----------|----------|----------|----------|----------|----------|----------|----------|----------|----------|----------|----------|
| 9319  | GBE1      | 3914.535 | 0.285197 | 0.094226 | 3.026725 | 0.002472 | 0.007053 | 3695.403 | 3564.746 | 3330.466 | 4127.203 | 4226.883 | 4542.507 |
| 22246 | HMCN2     | 68.76677 | 0.285106 | 0.416197 | 0.685026 | 0.493327 | 0.589556 | 63.96619 | 44.34036 | 75.83472 | 75.89232 | 113.3729 | 39.1942  |
| 24676 | ST8SIA5   | 7.132716 | 0.28504  | 0.940706 | 0.303007 | 0.761885 | 0.820794 | 5.420864 | 6.02153  | 7.653045 | 13.39276 | 4.278221 | 6.029877 |
| 16201 | FAM174A   | 593.639  | 0.284767 | 0.175065 | 1.62664  | 0.103814 | 0.170326 | 450.4738 | 676.601  | 477.2717 | 660.7096 | 671.6807 | 625.0972 |
| 18546 | LOC119622 | 222.0829 | 0.284633 | 0.228944 | 1.243244 | 0.213778 | 0.306443 | 196.2353 | 151.0857 | 254.6377 | 238.8376 | 237.4413 | 254.2598 |
| 15963 | PPFIA3    | 466.7652 | 0.284295 | 0.16998  | 1.67252  | 0.094422 | 0.157251 | 436.3795 | 349.7961 | 480.0546 | 484.3716 | 479.1608 | 570.8283 |
| 23910 | MDFI      | 22.41338 | 0.284209 | 0.674523 | 0.421348 | 0.673501 | 0.748851 | 17.88885 | 13.13788 | 28.52499 | 37.94616 | 29.94755 | 7.034856 |
| 10845 | MAPK14    | 4260.838 | 0.283908 | 0.106665 | 2.661669 | 0.007775 | 0.01906  | 4154.008 | 3593.759 | 3787.562 | 4450.861 | 4417.264 | 5161.575 |
| 10634 | TMEM259   | 5100.936 | 0.283906 | 0.104756 | 2.710171 | 0.006725 | 0.016812 | 4595.266 | 4343.165 | 4870.12  | 5636.121 | 5037.606 | 6123.34  |
| 21765 | LOC119624 | 51.2117  | 0.283887 | 0.370727 | 0.765757 | 0.443821 | 0.542108 | 40.11439 | 58.57306 | 39.65669 | 58.0353  | 55.61688 | 55.27387 |
| 12576 | KIFBP     | 2571.311 | 0.28384  | 0.124017 | 2.288723 | 0.022095 | 0.046709 | 2201.413 | 2658.779 | 2099.717 | 2915.158 | 2534.846 | 3017.953 |
| 21033 | EFNA4     | 76.20878 | 0.283767 | 0.324165 | 0.875381 | 0.381367 | 0.482012 | 62.33993 | 54.19377 | 89.74935 | 89.28508 | 81.28621 | 80.39836 |
| 9643  | WDFY1     | 3445.104 | 0.283749 | 0.0962   | 0.949562 | 0.003182 | 0.008773 | 3172.289 | 3246.152 | 2906.766 | 3776.759 | 3597.984 | 3970.674 |
| 10168 | GPC4      | 7611.034 | 0.283613 | 0.100504 | 2.821917 | 0.004774 | 0.012479 | 6578.218 | 7390.607 | 6633.799 | 7924.051 | 7983.161 | 9156.368 |
| 13402 | CAPN15    | 961.8762 | 0.283555 | 0.1333   | 2.127195 | 0.033404 | 0.066262 | 898.7792 | 766.3765 | 940.6288 | 1100.439 | 945.4869 | 1119.547 |
| 22589 | CDH8      | 37.62599 | 0.283459 | 0.452798 | 0.626017 | 0.531304 | 0.625292 | 31.44101 | 38.31883 | 30.61218 | 44.64254 | 55.61688 | 25.12449 |
| 24620 | ASB11     | 7.38141  | 0.283214 | 0.905243 | 0.31286  | 0.754387 | 0.814597 | 8.673382 | 4.926706 | 6.261582 | 6.696381 | 10.69555 | 7.034856 |
| 20462 | LOC119620 | 78.18692 | 0.282913 | 0.297135 | 0.952135 | 0.341029 | 0.443077 | 69.92914 | 64.59459 | 77.22618 | 98.21359 | 72.72976 | 86.42823 |
| 14962 | DEPDC7    | 537.887  | 0.282912 | 0.153636 | 1.841444 | 0.065556 | 0.116483 | 467.8205 | 526.6102 | 462.6614 | 654.0132 | 494.1346 | 622.0823 |
| 24085 | LOC119615 | 11.98693 | 0.282899 | 0.720494 | 0.392646 | 0.694581 | 0.766678 | 11.38381 | 8.758589 | 12.52316 | 15.62489 | 8.556443 | 15.07469 |
| 19293 | LOC103222 | 134.3212 | 0.282895 | 0.248915 | 1.136514 | 0.255741 | 0.352402 | 143.6529 | 100.7238 | 120.3615 | 133.9276 | 145.4595 | 161.8017 |
| 25315 | LOC103214 | 2.879469 | 0.28277  | 1.434128 | 0.197172 | 0.843693 | 0.886019 | 3.252518 | 2.189647 | 2.087194 | 4.464254 | 4.278221 | 1.004979 |
| 11193 | TCEAL8    | 4183.839 | 0.282726 | 0.109445 | 2.583268 | 0.009787 | 0.032345 | 3456.885 | 4095.735 | 3767.385 | 4642.824 | 4975.571 | 4164.635 |
| 22424 | LOC103225 | 36.72892 | 0.282703 | 0.43322  | 0.652563 | 0.514038 | 0.609423 | 34.15144 | 27.918   | 38.26523 | 29.01765 | 42.78221 | 48.23901 |
| 21145 | LOC119625 | 70.41727 | 0.282699 | 0.329188 | 0.858777 | 0.390464 | 0.490919 | 61.79785 | 73.90059 | 53.57132 | 73.66019 | 96.25998 | 63.31371 |
| 15020 | POLM      | 425.0096 | 0.282641 | 0.154475 | 1.829689 | 0.067296 | 0.119113 | 344.2248 | 425.339  | 380.5651 | 448.6575 | 491.9955 | 459.2756 |
| 9489  | RNF13     | 2189.475 | 0.282285 | 0.09451  | 2.986841 | 0.002819 | 0.007897 | 1984.036 | 1891.855 | 2050.32  | 2419.626 | 2451.421 | 2339.592 |
| 9596  | MIA2      | 2371.742 | 0.281837 | 0.095138 | 2.962392 | 0.003053 | 0.008457 | 2118.474 | 2221.397 | 2078.15  | 2698.642 | 2637.523 | 2476.269 |
| 16506 | ZNF546    | 226.9322 | 0.281676 | 0.178902 | 1.574466 | 0.11538  | 0.185828 | 203.8245 | 206.9217 | 203.8493 | 241.0697 | 256.6933 | 249.2349 |
| 11395 | ZMIZ2     | 2330.001 | 0.281558 | 0.110914 | 2.538519 | 0.011132 | 0.025972 | 1876.703 | 2272.854 | 2163.029 | 2604.892 | 2404.36  | 2658.171 |
| 16645 | PGBD2     | 255.1944 | 0.281493 | 0.181647 | 1.549673 | 0.12122  | 0.19361  | 220.0871 | 251.8094 | 217.0682 | 303.5693 | 282.3626 | 256.2698 |
| 14361 | LOC103247 | 602.1462 | 0.281274 | 0.144273 | 1.949592 | 0.051225 | 0.094827 | 578.9482 | 514.0197 | 541.9747 | 660.7096 | 577.5599 | 739.6649 |
| 23079 | PLA2G4E   | 23.19222 | 0.280886 | 0.511099 | 0.549573 | 0.582612 | 0.671119 | 20.59928 | 21.89647 | 20.17621 | 24.5534  | 27.80844 | 24.11951 |
| 25708 | LOC119623 | 1.285701 | 0.28069  | 2.101856 | 0.133544 | 0.893763 | 0.924217 | 1.626259 | 0.547412 | 1.391463 | 0        | 2.139111 | 2.009959 |
| 25709 | LOC119626 | 1.285701 | 0.28069  | 2.101856 | 0.133544 | 0.893763 | 0.924217 | 1.626259 | 0.547412 | 1.391463 | 0        | 2.139111 | 2.009959 |
| 15196 | UQCR10    | 3108.778 | 0.280523 | 0.156132 | 1.796704 | 0.072383 | 0.126631 | 3035.142 | 2060.458 | 3329.075 | 3363.815 | 3298.509 | 3565.667 |
| 21734 | LOC103233 | 62.53012 | 0.280518 | 0.363418 | 0.771888 | 0.440181 | 0.538429 | 41.19856 | 72.25836 | 54.96278 | 69.19594 | 81.28621 | 56.27885 |
| 23851 | RNF148    | 17.37876 | 0.280382 | 0.651727 | 0.430214 | 0.66704  | 0.743489 | 15.17842 | 10.94824 | 21.56767 | 8.928508 | 23.53022 | 24.11951 |
| 14845 | FAM177A1  | 1298.283 | 0.28014  | 0.150372 | 1.862976 | 0.062466 | 0.111866 | 1080.92  | 1421.081 | 1011.593 | 1491.061 | 1518.769 | 1266.274 |
| 22869 | LOC103241 | 28.3247  | 0.280059 | 0.480127 | 0.583302 | 0.55969  | 0.650606 | 26.02015 | 30.10765 | 20.87194 | 24.5534  | 34.22577 | 34.1693  |
| 14395 | AP1M2     | 1043.22  | 0.27973  | 0.143905 | 1.943845 | 0.051914 | 0.095876 | 1039.722 | 760.355  | 1026.9   | 1169.635 | 1140.146 | 1122.562 |
| 21558 | HAGHL     | 81.38721 | 0.279729 | 0.351494 | 0.795829 | 0.426132 | 0.525514 | 89.44425 | 45.98259 | 86.27069 | 91.51721 | 70.59065 | 104.5179 |
| 9735  | LOC103245 | 3799.854 | 0.279719 | 0.095798 | 2.919899 | 0.003501 | 0.009562 | 3552.292 | 3413.66  | 3338.119 | 4037.918 | 3948.798 | 4508.338 |
| 12918 | BBX       | 6220.699 | 0.279535 | 0.12602  | 2.218179 | 0.026543 | 0.05462  | 5110.79  | 6748.493 | 5002.309 | 6578.078 | 6686.86  | 7197.663 |
| 8368  | LOC103235 | 5725.685 | 0.279362 | 0.084822 | 3.293501 | 0.000989 | 0.003144 | 5355.813 | 4998.965 | 5165.805 | 6392.812 | 6060.101 | 6380.615 |
| 14637 | ERP44     | 1848.269 | 0.279233 | 0.147016 | 1.899343 | 0.057519 | 0.104472 | 1463.633 | 2082.902 | 1461.732 | 2116.056 | 1991.512 | 1973.78  |
| 15575 | RNF113A   | 468.8644 | 0.27914  | 0.161091 | 1.732809 | 0.08313  | 0.141894 | 413.6119 | 485.5543 | 368.7376 | 540.1747 | 534.7777 | 470.3304 |
| 10718 | MSMO1     | 16826.92 | 0.279117 | 0.103878 | 2.686965 | 0.00721  | 0.017885 | 16406.79 | 13553.37 | 15658.13 | 17977.55 | 17470.12 | 19895.58 |
| 21934 | MYH15     | 62.50596 | 0.279016 | 0.378088 | 0.737966 | 0.460535 | 0.558168 | 49.87195 | 66.23683 | 51.48412 | 66.96381 | 96.25998 | 44.2191  |
| 24560 | ZNF214    | 9.030372 | 0.278589 | 0.8645   | 0.322255 | 0.74726  | 0.808872 | 8.673382 | 8.211177 | 6.957314 | 15.62489 | 10.69555 | 4.019918 |
| 17963 | LOC119615 | 411.3536 | 0.278526 | 0.206455 | 1.349092 | 0.177307 | 0.262413 | 454.2684 | 296.6972 | 361.7803 | 415.1756 | 558.3079 | 381.8922 |
| 23665 | LOC103247 | 16.50384 | 0.278518 | 0.605302 | 0.460131 | 0.645422 | 0.72506  | 15.17842 | 13.6853  | 16.00182 | 20.08914 | 14.97377 | 19.09461 |
| 10130 | HIPK3     | 4959.549 | 0.278443 | 0.098352 | 2.831096 | 0.004639 | 0.012173 | 4238.031 | 4956.814 | 4252.31  | 5357.105 | 5488.958 | 5464.073 |
| 11071 | ALAS1     | 2924.289 | 0.278359 | 0.106599 | 2.61127  | 0.009021 | 0.021661 | 2681.701 | 2786.326 | 2466.368 | 3153.995 | 2951.973 | 3505.368 |
| 10476 | SNTB2     | 3000.938 | 0.278122 | 0.101129 | 2.750182 | 0.005956 | 0.015115 | 2658.392 | 2929.748 | 2553.334 | 3162.924 | 3212.944 | 3488.284 |
| 19752 | LOC103226 | 110.0671 | 0.277913 | 0.262213 | 1.059876 | 0.289201 | 0.389247 | 94.86511 | 117.1461 | 85.57496 | 129.4634 | 119.7902 | 113.5627 |
| 22407 | LOC119627 | 35.49711 | 0.277838 | 0.423913 | 0.655412 | 0.512202 | 0.607707 | 29.81475 | 37.77142 | 28.52499 | 40.17829 | 38.50399 | 38.18922 |
| 13825 | NRG1      | 2479.896 | 0.277722 | 0.135836 | 2.044535 | 0.040901 | 0.078671 | 2015.477 | 2733.775 | 1977.269 | 2631.678 | 2710.253 | 2810.928 |
| 24393 | LOC103236 | 12.16532 | 0.277595 | 0.798551 | 0.347624 | 0.728123 | 0.793527 | 11.9259  | 7.663765 | 13.2189  | 4.464254 | 25.66933 | 10.04979 |
| 14804 | MNT       | 501.6506 | 0.277588 | 0.148293 | 1.871886 | 0.061222 | 0.109941 | 434.7533 | 457.6363 | 468.2272 | 620.5313 | 477.0217 | 551.7337 |
| 9880  | ALDOA     | 24834.97 | 0.277573 | 0.096144 | 2.887047 | 0.003889 | 0.010464 | 22628.85 | 22842.4  | 21896.75 | 26312.31 | 25106.74 | 30222.75 |
| 12134 | GPKOW     | 1128.679 | 0.277534 | 0.116662 | 2.378946 | 0.017362 | 0.038043 | 1010.991 | 1067.453 | 985.8514 | 1276.777 | 1114.477 | 1316.523 |
| 12802 | DYRK3     | 705.5824 | 0.277485 | 0.12393  | 2.239048 | 0.025153 | 0.052233 | 623.3993 | 666.2002 | 626.1582 | 785.7087 | 723.0194 | 809.0085 |
| 22923 | SLC25A2   | 27.39961 | 0.277467 | 0.481836 | 0.575853 | 0.564714 | 0.654929 | 27.10432 | 25.72836 | 20.87194 | 33.4819  | 32.08666 | 25.12449 |
| 15261 | APLF      | 814.495  | 0.277366 | 0.15531  | 1.785883 | 0.074118 | 0.129116 | 649.4195 | 898.8502 | 659.5533 | 948.654  | 864.2007 | 866.2923 |
| 13641 | SNRNP25   | 1770.06  | 0.277365 | 0.133285 | 2.080994 | 0.037434 | 0.072956 | 1745.734 | 1304.482 | 1741.416 | 1930.79  | 2008.625 | 1880.317 |
| 8514  | ITPRID2   | 5780.452 | 0.277309 | 0.085243 | 2.353141 | 0.001141 | 0.003564 | 5289.679 | 5367.373 | 5024.572 | 6408.437 | 6096.465 | 6496.187 |
| 18927 | SAMD15    | 226.8557 | 0.277233 | 0.231195 | 1.199131 | 0.230477 | 0.32373  | 166.4205 | 265.4947 | 181.5859 | 261.1589 | 267.3888 | 219.0855 |
| 21246 | LOC103230 | 61.92248 | 0.277155 | 0.329138 | 0.842064 | 0.399752 | 0.500208 | 54.75072 | 52.55153 | 59.8329  | 66.96381 | 79.14709 | 58.28881 |



|       |           |          |          |          |          |           |          |          |          |          |          |          |          |
|-------|-----------|----------|----------|----------|----------|-----------|----------|----------|----------|----------|----------|----------|----------|
| 16621 | ACOT11    | 346.7926 | 0.276648 | 0.177957 | 1.55458  | 0.120046  | 0.192003 | 344.7669 | 270.4214 | 329.0809 | 345.9797 | 359.3706 | 431.1362 |
| 15033 | ALAD      | 730.0857 | 0.276546 | 0.151367 | 1.826996 | 0.0677    | 0.11971  | 734.527  | 558.3601 | 690.8613 | 821.4227 | 708.0456 | 867.2973 |
| 18545 | ZFYVE28   | 138.9576 | 0.276404 | 0.222208 | 1.243897 | 0.213537  | 0.306114 | 128.4745 | 122.0728 | 125.9274 | 162.9453 | 147.5986 | 146.727  |
| 22071 | RTL9      | 51.59753 | 0.276069 | 0.386844 | 0.713644 | 0.475447  | 0.572661 | 37.94605 | 63.49977 | 38.26523 | 53.57105 | 62.03421 | 54.26889 |
| 22388 | PRRX1     | 53.63664 | 0.275947 | 0.41787  | 0.660367 | 0.509018  | 0.604442 | 35.23561 | 37.77142 | 72.35606 | 51.33892 | 74.86887 | 50.24897 |
| 12078 | SLC25A13  | 2480.504 | 0.275925 | 0.115343 | 2.39222  | 0.016747  | 0.036862 | 2295.194 | 2306.793 | 2135.2   | 2787.927 | 2353.022 | 3004.889 |
| 23996 | LOC103231 | 13.54384 | 0.275888 | 0.677932 | 0.406956 | 0.68404   | 0.757844 | 14.63633 | 9.306001 | 12.52316 | 15.62489 | 17.11289 | 12.05975 |
| 24529 | LOC103241 | 9.319277 | 0.275872 | 0.847064 | 0.325681 | 0.744666  | 0.807045 | 9.215468 | 11.49565 | 4.174388 | 11.16063 | 12.83466 | 7.034856 |
| 12239 | ARL2      | 2991.165 | 0.275764 | 0.116903 | 2.35891  | 0.018329  | 0.039809 | 2904.499 | 2319.931 | 2897.721 | 3212.031 | 3146.632 | 3466.174 |
| 23636 | FAM180B   | 19.01601 | 0.275602 | 0.594614 | 0.463497 | 0.643008  | 0.723235 | 18.43094 | 12.04306 | 20.87194 | 17.85702 | 27.80844 | 17.08465 |
| 11482 | BAIAP2    | 1383.089 | 0.275515 | 0.109294 | 2.520872 | 0.011706  | 0.027105 | 1301.549 | 1171.461 | 1285.016 | 1502.221 | 1435.343 | 1602.942 |
| 24072 | LOC103241 | 13.16941 | 0.275177 | 0.698032 | 0.394218 | 0.69342   | 0.76581  | 13.55216 | 10.94824 | 11.1317  | 8.928508 | 21.39111 | 13.06473 |
| 24911 | LOC103241 | 5.491093 | 0.275121 | 1.047477 | 0.262652 | 0.792819  | 0.846096 | 6.505036 | 2.737059 | 5.565851 | 6.696381 | 6.417332 | 5.024897 |
| 13132 | MGRN1     | 836.8837 | 0.275003 | 0.12599  | 2.182743 | 0.029055  | 0.05882  | 730.7324 | 836.9927 | 705.4716 | 879.458  | 921.9567 | 946.6907 |
| 12741 | AKT3      | 6160.871 | 0.274991 | 0.122202 | 2.250293 | 0.02443   | 0.050976 | 5087.481 | 6646.674 | 4993.264 | 6598.167 | 6659.052 | 6980.587 |
| 11528 | ERP29     | 5594.316 | 0.274953 | 0.109625 | 2.508119 | 0.012138  | 0.027991 | 4783.912 | 5812.966 | 4590.436 | 6147.278 | 6137.109 | 6094.196 |
| 15047 | TEC       | 467.5511 | 0.274948 | 0.15071  | 1.824343 | 0.0681    | 0.120319 | 378.9184 | 465.3    | 425.7876 | 477.6752 | 539.0559 | 518.5694 |
| 22115 | LOC119621 | 48.51855 | 0.274717 | 0.388996 | 0.706221 | 0.480051  | 0.577101 | 45.53526 | 31.74989 | 54.96278 | 49.10679 | 53.47777 | 56.27885 |
| 11195 | RALGAP1   | 3731.816 | 0.274699 | 0.106343 | 2.583153 | 0.00979   | 0.023249 | 3285.585 | 3748.129 | 3102.266 | 3933.008 | 3989.441 | 4332.466 |
| 21811 | LOC119611 | 62.15044 | 0.273756 | 0.361079 | 0.75816  | 0.448355  | 0.546491 | 62.33993 | 38.31883 | 68.87741 | 66.96381 | 62.03421 | 74.36848 |
| 13183 | SPIR1     | 4495.058 | 0.273738 | 0.125968 | 2.173083 | 0.029774  | 0.060043 | 3788.642 | 4869.775 | 3551.709 | 4926.304 | 4763.799 | 5070.121 |
| 12596 | UBE2G1    | 2565.58  | 0.273641 | 0.119768 | 2.284768 | 0.022326  | 0.047122 | 2134.736 | 2701.477 | 2133.808 | 2796.855 | 2725.227 | 2901.376 |
| 20876 | LOC103221 | 83.98591 | 0.273588 | 0.305908 | 0.89435  | 0.371135  | 0.47263  | 94.32303 | 60.76271 | 72.35606 | 91.51721 | 100.5382 | 84.41828 |
| 25472 | LOC119621 | 2.542599 | 0.273581 | 1.616623 | 0.16923  | 0.865616  | 0.903439 | 3.794605 | 1.642235 | 1.391463 | 0        | 6.417332 | 2.009959 |
| 17535 | SALL1     | 561.1561 | 0.273539 | 0.19388  | 1.410868 | 0.158284  | 0.239975 | 440.7162 | 674.9588 | 409.09   | 593.7458 | 603.2292 | 645.1968 |
| 22786 | SLC17A7   | 32.97823 | 0.273451 | 0.459694 | 0.594853 | 0.551941  | 0.643936 | 24.93597 | 39.41365 | 25.74206 | 33.4819  | 32.08666 | 42.20914 |
| 12184 | SNRK      | 1686.833 | 0.273382 | 0.115364 | 2.369721 | 0.017802  | 0.038842 | 1436.529 | 1690.955 | 1458.253 | 1841.505 | 1721.984 | 1971.77  |
| 18697 | LOC103231 | 280.5388 | 0.273136 | 0.222214 | 1.229156 | 0.219013  | 0.311412 | 312.7838 | 185.5726 | 265.7694 | 283.4801 | 290.9191 | 344.708  |
| 23818 | GPR135    | 18.9956  | 0.273132 | 0.628725 | 0.434422 | 0.663982  | 0.741119 | 11.38381 | 24.63353 | 16.00182 | 11.16063 | 25.66933 | 25.12449 |
| 25482 | SLC25A31  | 2.864296 | 0.273129 | 1.629749 | 0.16759  | 0.866906  | 0.904395 | 5.96295  | 1.094824 | 0.695731 | 0        | 6.417332 | 3.014938 |
| 11163 | DHX32     | 1987.266 | 0.272718 | 0.105341 | 2.588898 | 0.009628  | 0.022931 | 1855.02  | 1829.45  | 1718.456 | 2247.752 | 1976.538 | 2296.378 |
| 23069 | LOC103231 | 30.02329 | 0.272676 | 0.495025 | 0.550833 | 0.581748  | 0.670414 | 24.39389 | 23.53871 | 32.69937 | 33.4819  | 44.92132 | 21.10457 |
| 13909 | LOC103211 | 2933.837 | 0.272657 | 0.134354 | 2.029401 | 0.042418  | 0.081075 | 2410.116 | 3229.182 | 2334.179 | 3053.55  | 3219.362 | 3356.631 |
| 15555 | ZEB2      | 2103.333 | 0.272276 | 0.156925 | 1.735076 | 0.082727  | 0.141389 | 1620.838 | 2456.784 | 1637.056 | 2359.358 | 2320.935 | 2225.025 |
| 18059 | LOC103211 | 273.4234 | 0.272182 | 0.204294 | 1.332307 | 0.182759  | 0.269043 | 218.4608 | 310.3825 | 214.981  | 294.6408 | 284.5017 | 317.5735 |
| 23731 | LOC119621 | 22.12697 | 0.272158 | 0.606857 | 0.448471 | 0.653813  | 0.732444 | 12.46799 | 15.32753 | 32.00364 | 33.4819  | 21.39111 | 18.08963 |
| 15883 | SH2D4A    | 633.1364 | 0.272099 | 0.161221 | 1.687735 | 0.091462  | 0.153089 | 499.8036 | 699.5923 | 521.1028 | 718.7449 | 663.1243 | 696.4508 |
| 15765 | ANAPC15   | 363.1371 | 0.272011 | 0.159297 | 1.707575 | 0.087715  | 0.147932 | 319.2889 | 328.4471 | 338.8212 | 357.1403 | 449.2132 | 385.9121 |
| 24925 | LOC119621 | 6.201537 | 0.271852 | 1.046111 | 0.259869 | 0.794965  | 0.84791  | 3.794605 | 2.737059 | 10.43597 | 8.928508 | 4.278221 | 7.034856 |
| 11278 | LOC103231 | 3012.512 | 0.271796 | 0.106069 | 2.562447 | 0.1010394 | 0.024501 | 2554.853 | 3023.355 | 2608.297 | 3484.35  | 3187.275 | 3216.939 |
| 9770  | TFRC      | 16908.4  | 0.271712 | 0.093336 | 2.911123 | 0.003601  | 0.0098   | 15342.13 | 15945.01 | 14682.71 | 17769.96 | 17506.48 | 20204.11 |
| 14488 | BHLHB9    | 449.8329 | 0.271534 | 0.14087  | 1.927545 | 0.053912  | 0.098928 | 390.3022 | 423.1493 | 410.4815 | 502.2286 | 466.3261 | 506.5097 |
| 25386 | LOC103231 | 3.908403 | 0.271243 | 1.478817 | 0.183419 | 0.85447   | 0.894827 | 0        | 7.116354 | 3.478657 | 6.696381 | 2.139111 | 4.019918 |
| 22663 | SOC51     | 35.65846 | 0.271143 | 0.442288 | 0.613046 | 0.539846  | 0.633279 | 37.94605 | 22.9913  | 36.17803 | 42.41041 | 34.22577 | 40.19918 |
| 14643 | SLK       | 5598.733 | 0.270764 | 0.142655 | 1.89803  | 0.057692  | 0.104743 | 4410.415 | 6410.74  | 4403.98  | 6078.082 | 5963.841 | 6325.341 |
| 23959 | LOC103241 | 16.13568 | 0.270701 | 0.655094 | 0.413225 | 0.679442  | 0.753911 | 10.84173 | 13.13788 | 19.48048 | 15.62489 | 25.66933 | 12.05975 |
| 20624 | LOC119621 | 79.86609 | 0.27046  | 0.289952 | 0.932775 | 0.350936  | 0.452368 | 66.67662 | 80.46954 | 70.26887 | 80.35657 | 91.98176 | 89.44317 |
| 14313 | ARHGAP6   | 758.0699 | 0.270415 | 0.138057 | 1.958724 | 0.050145  | 0.093132 | 612.0155 | 783.8937 | 667.2064 | 808.03   | 815.0012 | 862.2724 |
| 17997 | EID3      | 410.8983 | 0.270253 | 0.201139 | 1.343617 | 0.179072  | 0.264538 | 474.8677 | 279.7274 | 362.476  | 435.2648 | 474.8826 | 438.171  |
| 25660 | LOC119621 | 1.61006  | 0.270234 | 1.91692  | 1.040973 | 0.887891  | 0.919898 | 2.168345 | 1.642235 | 0.695731 | 0        | 2.139111 | 3.014938 |
| 12257 | GSE1      | 2157.723 | 0.270064 | 0.114715 | 2.354213 | 0.018562  | 0.04026  | 1840.383 | 2117.936 | 1916.74  | 2281.234 | 2169.058 | 2620.986 |
| 13861 | TRAF2     | 952.2577 | 0.269986 | 0.132518 | 2.037348 | 0.041615  | 0.079817 | 978.4659 | 760.9024 | 852.2709 | 1046.868 | 994.6865 | 1080.353 |
| 11550 | MAPRE1    | 3501.611 | 0.269985 | 0.107812 | 2.504215 | 0.012272  | 0.028248 | 3031.347 | 3559.272 | 2936.682 | 3674.081 | 3788.365 | 4019.918 |
| 14931 | SYF2      | 2046.722 | 0.269954 | 0.146039 | 1.848502 | 0.06453   | 0.114897 | 1614.333 | 2318.289 | 1634.969 | 2261.145 | 2156.224 | 2295.373 |
| 11421 | SETD3     | 3362.929 | 0.269953 | 0.106626 | 2.531764 | 0.011349  | 0.026417 | 2903.415 | 3352.35  | 2893.547 | 3832.562 | 3379.795 | 3815.907 |
| 17777 | SENPD     | 197.4841 | 0.269884 | 0.196003 | 1.376938 | 0.168532  | 0.252436 | 171.8414 | 168.6028 | 197.5877 | 207.5878 | 218.1893 | 221.0955 |
| 15484 | NT5E      | 660.531  | 0.269772 | 0.154359 | 1.747693 | 0.080517  | 0.138243 | 523.6554 | 706.1612 | 568.4125 | 656.2453 | 752.967  | 755.7446 |
| 14327 | LOC103231 | 874.9926 | 0.269684 | 0.137834 | 1.956584 | 0.050396  | 0.093515 | 808.2508 | 719.2991 | 855.0539 | 1037.939 | 821.4185 | 1007.994 |
| 8557  | PSMC6     | 5114.078 | 0.269654 | 0.083241 | 3.239456 | 0.001198  | 0.003721 | 4555.152 | 4724.711 | 4629.397 | 5636.121 | 5724.26  | 5414.829 |
| 13680 | SPACA9    | 727.2247 | 0.269471 | 0.130019 | 2.072558 | 0.038213  | 0.074262 | 659.7191 | 627.8814 | 695.0356 | 792.4051 | 723.0194 | 865.2873 |
| 13600 | LOC103221 | 2050.703 | 0.269175 | 0.128839 | 2.089233 | 0.036687  | 0.071714 | 2103.837 | 1617.054 | 1863.864 | 2073.646 | 2160.502 | 2485.314 |
| 21534 | STX11     | 59.21055 | 0.269159 | 0.336618 | 0.799599 | 0.423943  | 0.523383 | 49.87195 | 58.57306 | 53.57132 | 53.57105 | 66.31243 | 73.3635  |
| 12123 | MAP3K9    | 2117.552 | 0.269076 | 0.113029 | 2.380583 | 0.017285  | 0.037906 | 2031.74  | 1960.282 | 1775.506 | 2200.877 | 2171.197 | 2565.713 |
| 16306 | ACAD8     | 724.7309 | 0.269033 | 0.167528 | 1.605901 | 0.108296  | 0.176563 | 724.2274 | 605.4375 | 648.4216 | 743.2983 | 648.1505 | 978.85   |
| 22642 | LOC119621 | 2808.742 | 0.268879 | 0.435691 | 0.617133 | 0.537147  | 0.630688 | 2871.431 | 1326.926 | 3445.957 | 3087.032 | 2376.552 | 3744.554 |
| 24359 | ARMC12    | 13.23084 | 0.268769 | 0.761462 | 0.352964 | 0.724115  | 0.790283 | 13.55216 | 6.568942 | 15.30609 | 13.39276 | 23.53022 | 7.034856 |
| 8014  | S100A10   | 8823.871 | 0.268741 | 0.078855 | 3.408059 | 0.000654  | 0.00217  | 7884.646 | 8122.496 | 8008.564 | 9629.396 | 9446.313 | 9851.814 |
| 9100  | SENP5     | 4847.767 | 0.268447 | 0.087065 | 3.083273 | 0.002047  | 0.005981 | 4608.276 | 4289.519 | 4298.924 | 5278.98  | 5148.839 | 5462.063 |
| 11014 | DHX36     | 3764.873 | 0.268218 | 0.102119 | 2.626528 | 0.008626  | 0.020821 | 3282.875 | 3724.043 | 3244.891 | 3870.508 | 4094.258 | 4372.666 |
| 1     |           |          |          |          |          |           |          |          |          |          |          |          |          |



|       |            |          |          |          |          |          |          |          |          |          |          |          |          |
|-------|------------|----------|----------|----------|----------|----------|----------|----------|----------|----------|----------|----------|----------|
| 11454 | NR1D2      | 2763.936 | 0.267647 | 0.105966 | 2.525777 | 0.011544 | 0.026795 | 2385.722 | 2777.568 | 2362.008 | 2870.515 | 3131.658 | 3056.143 |
| 14309 | PTGR2      | 2366.529 | 0.267559 | 0.13657  | 1.959131 | 0.050097 | 0.093077 | 1948.258 | 2621.555 | 1871.517 | 2607.124 | 2633.245 | 2517.474 |
| 11652 | WSB2       | 2001.313 | 0.267525 | 0.107847 | 2.480612 | 0.013116 | 0.029924 | 1849.057 | 1850.252 | 1754.635 | 2200.877 | 1972.26  | 2380.796 |
| 9682  | FKBP15     | 7202.545 | 0.267271 | 0.091039 | 2.935784 | 0.003327 | 0.009135 | 6390.114 | 6976.764 | 6249.059 | 7618.249 | 7705.077 | 8276.006 |
| 11122 | GLCE       | 2832.696 | 0.267221 | 0.102872 | 2.597609 | 0.009388 | 0.022439 | 2436.136 | 2836.688 | 2442.017 | 3058.014 | 3037.537 | 3185.785 |
| 22542 | LOC119615  | 43.64985 | 0.26715  | 0.421236 | 0.634205 | 0.525947 | 0.620278 | 51.49821 | 27.37059 | 40.35242 | 37.94616 | 53.47777 | 51.25395 |
| 12069 | BHLHE40    | 24825.36 | 0.267132 | 0.111596 | 2.393739 | 0.016678 | 0.036735 | 20510.38 | 26044.76 | 21048.66 | 26606.95 | 25902.49 | 28838.89 |
| 24561 | LOC119621  | 9.109605 | 0.266873 | 0.828356 | 0.322172 | 0.747323 | 0.808884 | 7.589209 | 5.474118 | 11.82743 | 11.16063 | 8.556443 | 10.04979 |
| 13804 | ECD        | 1460.591 | 0.266603 | 0.130274 | 2.046474 | 0.04071  | 0.078403 | 1213.189 | 1557.387 | 1207.094 | 1647.31  | 1531.603 | 1606.962 |
| 14359 | MTHFR      | 707.8495 | 0.266465 | 0.136621 | 1.950397 | 0.051129 | 0.094663 | 687.9076 | 612.5538 | 632.4198 | 718.7449 | 725.1585 | 870.3122 |
| 16361 | SWT1       | 385.7079 | 0.26601  | 0.166798 | 1.594808 | 0.110755 | 0.179966 | 315.4943 | 397.421  | 338.8212 | 374.9973 | 451.3524 | 436.1611 |
| 12408 | NHS        | 2927.031 | 0.265643 | 0.114556 | 2.318888 | 0.020401 | 0.043707 | 2519.075 | 3021.713 | 2435.756 | 2988.818 | 3281.396 | 3315.427 |
| 25325 | LOC119615  | 3.271538 | 0.265277 | 1.354743 | 0.195814 | 0.844756 | 0.886789 | 2.168345 | 2.189647 | 4.87012  | 2.232127 | 2.139111 | 6.029877 |
| 8111  | TMED10     | 13685.28 | 0.265244 | 0.078567 | 3.376001 | 0.000735 | 0.002411 | 12339.51 | 12616.75 | 12340.19 | 14714.18 | 14629.38 | 15471.66 |
| 10516 | PSMA3      | 5475.523 | 0.264985 | 0.09669  | 2.74056  | 0.006133 | 0.015504 | 5047.366 | 4555.561 | 5316.779 | 6024.511 | 6190.586 | 5718.333 |
| 12103 | ULK3       | 2477.509 | 0.264648 | 0.110926 | 2.3858   | 0.017042 | 0.037434 | 2291.941 | 2202.238 | 2265.997 | 2633.91  | 2427.891 | 3043.078 |
| 14500 | NOTCH1     | 1100.88  | 0.26457  | 0.137422 | 1.925238 | 0.0542   | 0.099372 | 1012.617 | 875.3115 | 1118.04  | 1154.01  | 1101.642 | 1343.658 |
| 10862 | STAT3      | 7652.127 | 0.264444 | 0.099518 | 2.657252 | 0.007878 | 0.019282 | 6795.595 | 7447.538 | 6621.275 | 8169.585 | 7775.667 | 9103.104 |
| 20767 | LOC103231  | 103.2813 | 0.264443 | 0.291008 | 0.908715 | 0.363501 | 0.465315 | 112.2119 | 82.65918 | 87.66215 | 127.2312 | 81.28621 | 128.6374 |
| 10662 | MTFR1L     | 2253.499 | 0.263892 | 0.097721 | 2.700482 | 0.006924 | 0.017264 | 2082.696 | 2024.876 | 2041.972 | 2377.215 | 2355.161 | 2639.076 |
| 13616 | TMEM63A    | 1406.96  | 0.26379  | 0.126444 | 2.086213 | 0.036959 | 0.072162 | 1375.815 | 1171.461 | 1294.756 | 1482.132 | 1384.005 | 1733.59  |
| 23965 | LOC119615  | 16.56994 | 0.263744 | 0.639748 | 0.412262 | 0.680147 | 0.754505 | 15.17842 | 12.59047 | 16.69755 | 26.78552 | 17.11289 | 11.05477 |
| 11298 | TTC1       | 2119.864 | 0.263661 | 0.10302  | 2.559334 | 0.010487 | 0.024677 | 1868.03  | 2082.355 | 1831.861 | 2319.18  | 2211.84  | 2405.921 |
| 9699  | CUNH3orf1  | 4512.794 | 0.263625 | 0.089983 | 2.929726 | 0.003393 | 0.009299 | 4031.496 | 4353.019 | 3917.663 | 5064.696 | 4890.007 | 4819.882 |
| 18123 | CUNH3orf1  | 239.4116 | 0.263538 | 0.200125 | 1.316869 | 0.187882 | 0.275609 | 240.6863 | 178.4563 | 235.1572 | 258.9267 | 243.8586 | 279.3843 |
| 12086 | ZNF316     | 1251.769 | 0.263386 | 0.110201 | 2.390049 | 0.016846 | 0.037057 | 1141.092 | 1090.444 | 1185.526 | 1383.919 | 1268.493 | 1441.141 |
| 25069 | LOC103211  | 5.833164 | 0.263126 | 1.119651 | 0.235007 | 0.814203 | 0.863441 | 8.673382 | 2.189647 | 5.565851 | 2.232127 | 4.278221 | 12.05975 |
| 8421  | TMED7      | 8834.552 | 0.26312  | 0.080324 | 3.275739 | 0.001054 | 0.003327 | 7877.599 | 8345.293 | 7869.418 | 9665.11  | 9679.476 | 9570.419 |
| 15692 | UTP3       | 1088.831 | 0.263119 | 0.15305  | 1.719174 | 0.085583 | 0.144992 | 863.5436 | 1206.496 | 902.3636 | 1129.456 | 1116.616 | 1314.513 |
| 13649 | DLC1       | 1824.255 | 0.263068 | 0.126543 | 2.078888 | 0.037628 | 0.07329  | 1563.919 | 1890.213 | 1523.652 | 2053.557 | 1777.601 | 2136.586 |
| 16038 | ALKBH6     | 373.7555 | 0.262843 | 0.158497 | 1.65835  | 0.097247 | 0.161199 | 351.8141 | 330.0893 | 338.8212 | 439.729  | 352.9533 | 429.1262 |
| 19538 | ENDOG      | 174.6868 | 0.262805 | 0.240316 | 1.093582 | 0.274138 | 0.373015 | 174.0097 | 131.9262 | 171.8456 | 142.8561 | 222.4675 | 205.0158 |
| 10865 | TCF25      | 3172.76  | 0.262765 | 0.09892  | 2.656341 | 0.007899 | 0.019329 | 3037.852 | 2779.757 | 2842.063 | 3350.423 | 3289.952 | 3736.514 |
| 12291 | LOC103241  | 1336.809 | 0.262588 | 0.111923 | 2.346155 | 0.018968 | 0.041028 | 863.5436 | 1130.953 | 1272.493 | 1421.865 | 1565.829 | 1388.882 |
| 14442 | TCIRG1     | 3062.091 | 0.262458 | 0.135581 | 1.935809 | 0.052891 | 0.097362 | 2992.317 | 2323.763 | 3042.433 | 3310.244 | 2939.138 | 3764.653 |
| 13196 | UBE2B      | 2175.622 | 0.262343 | 0.120899 | 2.169936 | 0.030012 | 0.060462 | 2055.592 | 1684.934 | 2193.641 | 2448.643 | 2376.552 | 2294.368 |
| 13391 | LAMTOR5    | 1907.114 | 0.262215 | 0.12315  | 2.129229 | 0.033235 | 0.065982 | 1684.804 | 1552.46  | 1963.354 | 2270.073 | 2019.32  | 1952.675 |
| 16372 | NEIL1      | 621.6471 | 0.262107 | 0.16444  | 1.593934 | 0.110951 | 0.180163 | 632.0727 | 458.1837 | 608.0692 | 703.12   | 596.8119 | 731.6251 |
| 11944 | FKBP1A     | 8576.67  | 0.262012 | 0.108486 | 2.415156 | 0.015728 | 0.035009 | 7392.432 | 8801.835 | 7209.864 | 9116.007 | 8855.918 | 10083.96 |
| 17062 | LOC119621  | 381.2008 | 0.261773 | 0.176214 | 1.485534 | 0.137402 | 0.214084 | 401.1439 | 303.8136 | 333.9511 | 379.4616 | 474.8826 | 393.952  |
| 17071 | TRAPPC6A   | 653.9456 | 0.261738 | 0.176275 | 1.484828 | 0.137589 | 0.214288 | 697.1231 | 442.3087 | 645.6387 | 723.2091 | 688.7936 | 726.6002 |
| 17531 | DNLZ       | 331.9909 | 0.261682 | 0.1854   | 1.411448 | 0.158113 | 0.239771 | 329.0464 | 256.1887 | 324.2108 | 339.2833 | 325.1448 | 418.0715 |
| 10939 | CCDC8      | 2165.089 | 0.261641 | 0.099063 | 2.641155 | 0.008262 | 0.02008  | 1955.306 | 2012.833 | 1945.265 | 2294.627 | 2243.927 | 2538.578 |
| 9930  | STAG1      | 5411.671 | 0.261626 | 0.090891 | 2.878456 | 0.003996 | 0.010699 | 4841.373 | 5198.223 | 4731.669 | 5787.905 | 5690.034 | 6220.823 |
| 12597 | ARHGAP5    | 4605.556 | 0.261577 | 0.114518 | 2.28416  | 0.022362 | 0.047194 | 3853.15  | 4867.038 | 3848.09  | 4912.911 | 5007.658 | 5144.49  |
| 23881 | LOC119621  | 17.73523 | 0.261576 | 0.614134 | 0.425926 | 0.670162 | 0.746043 | 15.7205  | 16.96977 | 15.30609 | 13.39276 | 29.94755 | 15.07469 |
| 16752 | ATN1       | 1585.583 | 0.261484 | 0.170624 | 1.532513 | 0.125396 | 0.198988 | 1140.008 | 1884.191 | 1304.496 | 1622.756 | 1687.758 | 1874.287 |
| 20981 | LOC119621  | 113.9602 | 0.261244 | 0.296413 | 0.881351 | 0.378128 | 0.479125 | 107.8752 | 106.1979 | 93.92374 | 133.9276 | 160.4333 | 81.40334 |
| 24093 | TRNAR-CC1  | 15.56895 | 0.261181 | 0.66694  | 0.39161  | 0.695346 | 0.767313 | 14.63633 | 8.211177 | 19.48048 | 15.62489 | 21.39111 | 14.06971 |
| 23200 | LOC103241  | 27.78678 | 0.261001 | 0.492779 | 0.529652 | 0.596353 | 0.683306 | 29.81475 | 23.53871 | 22.2634  | 22.32127 | 40.6431  | 28.13943 |
| 12997 | CUNH7orf1  | 2747.508 | 0.260994 | 0.118418 | 2.204    | 0.027524 | 0.0563   | 2636.708 | 2136.001 | 2729.354 | 3004.443 | 2845.017 | 3133.526 |
| 12711 | PISD       | 2048.961 | 0.260836 | 0.115599 | 2.256396 | 0.024046 | 0.050292 | 1967.774 | 1708.472 | 1923.002 | 2118.289 | 2089.911 | 2486.319 |
| 22305 | PRDM8      | 66.34999 | 0.260692 | 0.386735 | 0.674084 | 0.500258 | 0.59625  | 47.7036  | 84.30142 | 48.00546 | 60.26743 | 100.5382 | 57.28383 |
| 9857  | FAM32A     | 2909.185 | 0.260449 | 0.090071 | 2.8916   | 0.003833 | 0.010337 | 2600.388 | 2739.796 | 2602.731 | 3236.584 | 3054.65  | 3220.959 |
| 12745 | NMRAL1     | 839.0859 | 0.260413 | 0.115735 | 2.250091 | 0.024443 | 0.050986 | 786.0252 | 728.6051 | 777.8277 | 906.2436 | 894.1483 | 941.6658 |
| 11223 | RLF        | 2702.404 | 0.260276 | 0.101051 | 2.575696 | 0.010004 | 0.023697 | 2372.17  | 2675.202 | 2332.787 | 2832.569 | 2945.555 | 3056.143 |
| 12197 | LOC103221  | 6536.585 | 0.259939 | 0.109827 | 2.366808 | 0.017942 | 0.039108 | 5606.799 | 6839.363 | 5402.354 | 7095.932 | 6979.918 | 7295.146 |
| 15234 | RAB11B     | 618.0878 | 0.259911 | 0.145231 | 1.789641 | 0.073512 | 0.128286 | 514.44   | 648.1356 | 524.5815 | 700.8879 | 648.1505 | 672.3313 |
| 14850 | RP56KB2    | 1874.67  | 0.259908 | 0.139576 | 1.862128 | 0.062585 | 0.112035 | 1888.629 | 1359.771 | 1872.213 | 2082.574 | 1927.339 | 2117.492 |
| 20596 | ISG15      | 153.8584 | 0.259823 | 0.276958 | 0.93813  | 0.348178 | 0.449423 | 166.4205 | 99.62895 | 155.1481 | 191.9629 | 124.0684 | 185.9212 |
| 17096 | PRDX5      | 5290.225 | 0.259772 | 0.175259 | 1.482223 | 0.138281 | 0.215033 | 5793.277 | 3298.704 | 5357.132 | 5549.068 | 5242.96  | 6500.207 |
| 22886 | GNB3       | 40.75926 | 0.259534 | 0.445953 | 0.581977 | 0.560582 | 0.651187 | 36.31979 | 36.12918 | 37.56949 | 37.94616 | 68.45154 | 28.13943 |
| 10806 | ESD        | 2080.936 | 0.259442 | 0.09719  | 2.669418 | 0.007598 | 0.018693 | 1831.71  | 1964.114 | 1885.432 | 2200.877 | 2391.526 | 2211.96  |
| 12698 | DNMT3B     | 1214.784 | 0.259375 | 0.114801 | 2.259337 | 0.023862 | 0.049959 | 1125.371 | 1186.789 | 1006.723 | 1283.473 | 1315.553 | 1370.792 |
| 15174 | ZFP1       | 466.5485 | 0.259372 | 0.143997 | 1.801239 | 0.071665 | 0.125557 | 400.0597 | 436.8346 | 440.398  | 488.8358 | 483.439  | 549.7238 |
| 22126 | LOC103221  | 49.11314 | 0.259314 | 0.36813  | 0.704409 | 0.481178 | 0.578149 | 49.32986 | 42.69812 | 41.74388 | 64.73168 | 44.92132 | 51.25395 |
| 12706 | MACF1      | 47856.23 | 0.259213 | 0.114847 | 2.257035 | 0.024006 | 0.050228 | 40481.38 | 50059.17 | 40170.14 | 50175.98 | 48724.66 | 57526.03 |
| 20989 | CUNH11orf1 | 115.6486 | 0.259182 | 0.294317 | 0.880623 | 0.378522 | 0.479442 | 115.4644 | 79.37471 | 121.753  | 151.7846 | 89.84265 | 135.6722 |
| 25374 | ABHD1      | 3.232987 | 0.259068 | 1.39387  | 0.185862 | 0.852553 | 0.893207 | 1.084173 | 5.474118 | 2.087194 | 4.464254 | 4.278221 | 2.009959 |
| 12784 | DIAPH1     |          |          |          |          |          |          |          |          |          |          |          |          |



|       |           |          |          |          |          |          |          |          |          |          |          |          |          |
|-------|-----------|----------|----------|----------|----------|----------|----------|----------|----------|----------|----------|----------|----------|
| 13003 | ALG11     | 2314.923 | 0.258862 | 0.117497 | 2.203131 | 0.027586 | 0.056399 | 2104.379 | 2370.841 | 1849.95  | 2459.804 | 2451.421 | 2653.146 |
| 13006 | ARHGEF5   | 3119.725 | 0.258855 | 0.117506 | 2.202899 | 0.027602 | 0.05642  | 2630.203 | 3279.544 | 2614.558 | 3290.155 | 3307.065 | 3596.822 |
| 15429 | KIF27     | 1566.037 | 0.258853 | 0.147441 | 1.755643 | 0.079149 | 0.136379 | 1266.856 | 1767.045 | 1243.272 | 1629.453 | 1786.157 | 1703.44  |
| 13162 | ZNF217    | 4652.917 | 0.258722 | 0.118771 | 2.178319 | 0.029382 | 0.059347 | 3978.372 | 4949.698 | 3784.083 | 5031.214 | 4855.781 | 5318.351 |
| 13262 | CLPTM1    | 4397.238 | 0.2584   | 0.119887 | 2.155369 | 0.031133 | 0.062409 | 3676.972 | 4611.945 | 3728.424 | 4767.823 | 4389.455 | 5208.809 |
| 10171 | CNOT10    | 3846.765 | 0.258345 | 0.09157  | 2.821278 | 0.004783 | 0.012503 | 3446.043 | 3722.4   | 3342.989 | 4071.4   | 4205.492 | 4292.267 |
| 18269 | MHC-DMA   | 200.7351 | 0.258091 | 0.200127 | 1.289637 | 0.197177 | 0.2869   | 185.3935 | 165.3184 | 199.6749 | 198.6593 | 218.1893 | 237.1752 |
| 12742 | COG3      | 1321.842 | 0.257974 | 0.114646 | 2.250183 | 0.024437 | 0.050982 | 1220.236 | 1302.293 | 1089.515 | 1383.919 | 1473.847 | 1461.24  |
| 23024 | CLEC19A   | 40.93159 | 0.257834 | 0.461596 | 0.55857  | 0.576455 | 0.665612 | 39.5723  | 29.01283 | 41.74388 | 49.10679 | 62.03421 | 24.11951 |
| 15984 | KCTD6     | 370.0634 | 0.257818 | 0.154553 | 1.668154 | 0.095285 | 0.158461 | 352.8982 | 335.5634 | 320.0364 | 419.6399 | 421.4048 | 370.8374 |
| 13181 | NXF1      | 1580.883 | 0.257794 | 0.118592 | 2.173793 | 0.029721 | 0.059944 | 1328.654 | 1565.598 | 1431.119 | 1651.774 | 1610.75  | 1897.401 |
| 11190 | RELCH     | 3205.666 | 0.257759 | 0.099742 | 2.584265 | 0.009759 | 0.023184 | 3055.199 | 2867.89  | 2843.454 | 3285.691 | 3381.934 | 3799.827 |
| 10797 | STAMBP1   | 2367.713 | 0.257525 | 0.096398 | 2.671464 | 0.007552 | 0.018596 | 2156.962 | 2271.212 | 2042.667 | 2640.606 | 2489.925 | 2604.907 |
| 18748 | AMN       | 237.3432 | 0.257375 | 0.210147 | 1.224734 | 0.220675 | 0.312922 | 246.6493 | 169.6977 | 233.7657 | 236.6055 | 260.9715 | 276.3694 |
| 11698 | TM9SF2    | 6219.942 | 0.25707  | 0.104003 | 2.471769 | 0.013445 | 0.030544 | 5493.503 | 6227.904 | 5285.471 | 6439.686 | 6530.705 | 7342.38  |
| 10924 | BPGM      | 5446.587 | 0.25691  | 0.097077 | 2.646453 | 0.008134 | 0.019795 | 5249.022 | 4544.065 | 5097.624 | 6107.099 | 5606.609 | 6075.101 |
| 18695 | ZNF132    | 204.2508 | 0.256825 | 0.208914 | 1.229334 | 0.218947 | 0.31135  | 201.6561 | 182.2881 | 176.02   | 176.338  | 245.9977 | 243.205  |
| 16307 | LOC119615 | 424.359  | 0.256782 | 0.160016 | 1.604734 | 0.108552 | 0.176971 | 439.09   | 344.8694 | 377.7821 | 430.8005 | 464.187  | 489.425  |
| 18211 | TNNI2     | 197.9938 | 0.256682 | 0.197531 | 1.299452 | 0.193789 | 0.282899 | 188.104  | 160.3917 | 193.4133 | 212.0521 | 213.9111 | 220.0905 |
| 22785 | MROH7     | 41.23939 | 0.25643  | 0.430838 | 0.59519  | 0.551717 | 0.64373  | 39.03022 | 30.65506 | 41.74388 | 49.10679 | 57.75599 | 29.1444  |
| 16241 | DPYSL4    | 946.8496 | 0.256315 | 0.158362 | 1.618539 | 0.105546 | 0.17277  | 958.4087 | 684.8122 | 949.6733 | 968.7431 | 964.7389 | 1154.721 |
| 10107 | PPP5C     | 3331.885 | 0.256304 | 0.090343 | 2.837012 | 0.004554 | 0.011978 | 2992.859 | 3139.407 | 2981.905 | 3484.35  | 3597.984 | 3794.802 |
| 22368 | TENM1     | 55.42883 | 0.256259 | 0.385728 | 0.664352 | 0.506465 | 0.601948 | 39.5723  | 54.74118 | 56.35424 | 49.10679 | 85.56443 | 47.23404 |
| 23163 | MBNL3     | 41.00101 | 0.25623  | 0.478707 | 0.535253 | 0.592475 | 0.680004 | 33.06727 | 41.05589 | 36.17803 | 53.57105 | 62.03421 | 20.09959 |
| 14293 | NFATC3    | 1625.379 | 0.256198 | 0.130548 | 1.962486 | 0.049706 | 0.092453 | 1340.038 | 1750.623 | 1354.589 | 1770.077 | 1704.871 | 1832.078 |
| 19706 | PEX11G    | 163.8321 | 0.256053 | 0.23953  | 1.068982 | 0.285078 | 0.384593 | 168.5889 | 113.3142 | 166.9755 | 169.6417 | 177.5462 | 186.9262 |
| 13672 | LOC103234 | 3748.162 | 0.255949 | 0.123402 | 2.074109 | 0.038069 | 0.074025 | 3224.33  | 4000.486 | 3027.127 | 4069.167 | 3818.313 | 4349.551 |
| 21348 | TULP2     | 73.43718 | 0.255938 | 0.310428 | 0.824471 | 0.409672 | 0.510171 | 73.18166 | 55.83601 | 70.9646  | 82.5887  | 87.70354 | 70.34856 |
| 11138 | ZFYVE16   | 4511.747 | 0.255782 | 0.098583 | 2.594584 | 0.009471 | 0.022605 | 4144.792 | 4419.256 | 3777.126 | 4694.163 | 4900.703 | 5134.44  |
| 16653 | APBA3     | 499.018  | 0.255764 | 0.165248 | 1.54776  | 0.12168  | 0.194251 | 520.945  | 382.6409 | 464.0528 | 506.6928 | 519.8039 | 599.9727 |
| 10715 | CPD       | 19069.1  | 0.255751 | 0.095129 | 2.68847  | 0.007178 | 0.017809 | 17100.11 | 18735.17 | 16319.77 | 20267.71 | 19720.46 | 22271.35 |
| 13451 | FGFRL1    | 828.1016 | 0.255628 | 0.120752 | 2.116973 | 0.034262 | 0.067717 | 712.8436 | 778.967  | 776.4362 | 881.6902 | 859.9225 | 958.7504 |
| 16628 | BMT2      | 353.0716 | 0.255353 | 0.164415 | 1.553104 | 0.120398 | 0.192494 | 340.4302 | 280.8223 | 344.387  | 372.7652 | 402.1528 | 377.8723 |
| 25038 | CDC92B    | 5.546286 | 0.255343 | 1.066868 | 0.239339 | 0.810843 | 0.860968 | 4.878777 | 4.379295 | 5.565851 | 11.16063 | 4.278627 | 3.014938 |
| 11516 | PGD       | 20182.45 | 0.255208 | 0.101652 | 2.510612 | 0.012052 | 0.027823 | 17779.89 | 20431.6  | 16998.11 | 21872.61 | 20646.7  | 23365.77 |
| 16671 | LOC103231 | 304.3441 | 0.255148 | 0.165    | 1.546353 | 0.122019 | 0.194691 | 265.0802 | 279.7274 | 290.12   | 312.4978 | 320.8666 | 357.7727 |
| 9236  | DEGS1     | 5650.898 | 0.2551   | 0.083752 | 3.045877 | 0.00232  | 0.006678 | 5202.403 | 5048.232 | 5211.724 | 6042.368 | 5995.927 | 6404.734 |
| 12023 | MTFR1     | 1209.403 | 0.255088 | 0.106173 | 2.402558 | 0.016281 | 0.036    | 1082.004 | 1139.164 | 1088.124 | 1247.759 | 1364.753 | 1334.613 |
| 13866 | KRT7      | 1289.555 | 0.254716 | 0.125072 | 2.036552 | 0.041695 | 0.079941 | 1190.964 | 1023.66  | 1314.932 | 1430.793 | 1351.918 | 1425.061 |
| 24382 | CUNH17or  | 12.08262 | 0.254554 | 0.728694 | 0.349329 | 0.726843 | 0.792515 | 11.38381 | 7.116354 | 14.61036 | 15.62489 | 10.69555 | 13.06473 |
| 10926 | SRP14     | 8942.691 | 0.254528 | 0.096183 | 2.646283 | 0.008138 | 0.019802 | 7601.677 | 9007.114 | 7856.894 | 9939.661 | 9694.45  | 9556.35  |
| 25017 | LOC119621 | 5.512606 | 0.254476 | 1.047607 | 0.242912 | 0.808074 | 0.858722 | 3.794605 | 7.663765 | 3.478657 | 6.696381 | 6.417332 | 5.024897 |
| 18106 | LHX2      | 195.8843 | 0.254424 | 0.192776 | 1.319793 | 0.186904 | 0.274431 | 179.4306 | 181.7407 | 176.02   | 212.0521 | 198.9373 | 227.1254 |
| 19327 | LOC103221 | 146.5867 | 0.254399 | 0.224908 | 1.131126 | 0.258002 | 0.354891 | 139.3162 | 121.5254 | 141.2335 | 140.624  | 168.9897 | 167.8316 |
| 23998 | PRSS47    | 17.90188 | 0.254317 | 0.625508 | 0.406577 | 0.684318 | 0.758073 | 16.80468 | 12.59047 | 18.78475 | 26.78552 | 21.39111 | 11.05477 |
| 21126 | SLC25A34  | 97.92283 | 0.254227 | 0.295206 | 0.861184 | 0.389137 | 0.489691 | 101.3702 | 76.09024 | 91.14081 | 75.89232 | 130.4858 | 112.5577 |
| 24634 | LOC103226 | 10.36821 | 0.253946 | 0.819756 | 0.309783 | 0.756726 | 0.816658 | 4.878777 | 10.94824 | 12.52316 | 6.696381 | 17.11289 | 10.04979 |
| 14783 | STAM      | 2019.729 | 0.25391  | 0.135318 | 1.876386 | 0.060602 | 0.108984 | 1706.488 | 2208.259 | 1614.793 | 2098.199 | 2136.972 | 2353.662 |
| 21842 | LOC103221 | 68.79312 | 0.253837 | 0.336632 | 0.754047 | 0.450821 | 0.548676 | 62.88202 | 53.09895 | 72.35606 | 55.80317 | 96.25998 | 72.35852 |
| 17999 | CDC157    | 294.2675 | 0.253822 | 0.189028 | 1.342776 | 0.179345 | 0.264897 | 269.959  | 243.0508 | 296.3816 | 272.3195 | 308.0319 | 375.8623 |
| 23351 | HAS2      | 29.11897 | 0.253809 | 0.501757 | 0.505841 | 0.612969 | 0.697862 | 29.27266 | 27.918   | 21.56767 | 26.78552 | 47.06043 | 22.10955 |
| 15490 | ZNF667    | 418.1797 | 0.253792 | 0.145333 | 1.746287 | 0.080761 | 0.138599 | 389.7601 | 391.9469 | 363.1718 | 473.2109 | 425.683  | 465.3055 |
| 25686 | TRNAG-GC  | 1.953485 | 0.253666 | 1.855614 | 0.136702 | 0.891266 | 0.922392 | 3.252518 | 0        | 2.087194 | 2.232127 | 2.139111 | 2.009959 |
| 16309 | CHCHD7    | 391.1129 | 0.253588 | 0.158077 | 1.604201 | 0.10867  | 0.17713  | 361.0295 | 390.852  | 320.0364 | 412.9435 | 408.5701 | 453.2457 |
| 11617 | FIS1      | 4824.576 | 0.253456 | 0.10177  | 2.490474 | 0.012757 | 0.029195 | 4586.593 | 3951.766 | 4664.183 | 5334.783 | 5435.48  | 4974.648 |
| 17713 | LAMTOR4   | 1684.484 | 0.253444 | 0.183327 | 1.382467 | 0.166828 | 0.2504   | 1736.303 | 1026.945 | 1847.167 | 1883.915 | 1585.887 | 1753.689 |
| 23810 | ATOH7     | 20.17159 | 0.253407 | 0.582075 | 0.435352 | 0.663307 | 0.740634 | 26.02015 | 14.23271 | 15.30609 | 20.08914 | 19.252   | 26.12947 |
| 22630 | KIAA1755  | 39.01532 | 0.25328  | 0.40914  | 0.619054 | 0.535881 | 0.629561 | 41.74065 | 29.56024 | 35.4823  | 40.17829 | 44.92132 | 42.20914 |
| 12989 | BLZF1     | 1121.313 | 0.253233 | 0.114816 | 2.205553 | 0.027415 | 0.056112 | 975.2134 | 1102.487 | 988.6343 | 1229.902 | 1274.91  | 1156.731 |
| 22094 | CFAP65    | 58.50508 | 0.253214 | 0.356354 | 0.710569 | 0.477352 | 0.574358 | 45.53526 | 49.81448 | 64.00729 | 60.26743 | 79.14709 | 52.25893 |
| 23306 | TRNAQ-CU  | 26.11228 | 0.253194 | 0.493729 | 0.51282  | 0.608077 | 0.69363  | 25.47806 | 21.34906 | 25.04633 | 31.24978 | 21.39111 | 32.15934 |
| 15112 | ARPC1B    | 8659.062 | 0.253169 | 0.13977  | 1.811328 | 0.07009  | 0.123302 | 9172.101 | 6150.172 | 8384.259 | 9499.932 | 8689.068 | 10058.84 |
| 12266 | CDCA2     | 1353.199 | 0.253137 | 0.10765  | 2.351483 | 0.018699 | 0.040527 | 1294.502 | 1207.043 | 1205.702 | 1488.829 | 1375.448 | 1547.668 |
| 16313 | LOC103241 | 389.8297 | 0.252845 | 0.157691 | 1.603425 | 0.108841 | 0.177376 | 374.0396 | 313.667  | 379.1736 | 444.1933 | 412.8484 | 415.0565 |
| 22063 | LOC119621 | 59.86325 | 0.2528   | 0.353798 | 0.714533 | 0.474898 | 0.572232 | 44.45108 | 53.09895 | 65.39875 | 66.96381 | 77.00798 | 52.25893 |
| 12325 | MDM2      | 4653.644 | 0.252746 | 0.107984 | 2.340592 | 0.019253 | 0.041529 | 4077.032 | 4822.151 | 3841.829 | 4982.107 | 5080.388 | 5118.36  |
| 24187 | LOC119621 | 16.83907 | 0.252658 | 0.671487 | 0.376266 | 0.706719 | 0.776786 | 12.46799 | 12.04306 | 21.56767 | 8.928508 | 29.94755 | 16.07967 |
| 11429 | P3H2      | 2361.162 | 0.252604 | 0.099843 | 2.530004 | 0.011406 | 0.026532 | 2180.813 | 2219.755 | 2069.105 | 2395.072 | 2562.655 | 2739.574 |
| 23372 | KIF4B     | 25.00815 | 0.252583 | 0.502423 | 0.502729 | 0.615155 | 0.699721 | 21.68345 | 24.08612 | 22.95914 | 20.08914 | 32.08666 | 29.1444  |
| 22011 | CYP2J2    | 61.46675 | 0.252527 |          |          |          |          |          |          |          |          |          |          |



|       |          |          |          |          |          |          |          |          |          |          |          |          |          |
|-------|----------|----------|----------|----------|----------|----------|----------|----------|----------|----------|----------|----------|----------|
| 16820 | ZFP36L1  | 4281.495 | 0.251928 | 0.165544 | 1.521815 | 0.128055 | 0.202399 | 3011.832 | 5185.632 | 3528.75  | 4528.986 | 4661.122 | 4772.647 |
| 25088 | LOC10324 | 6.179515 | 0.251767 | 1.084105 | 0.232235 | 0.816355 | 0.864998 | 8.673382 | 1.642235 | 6.261582 | 8.928508 | 8.556443 | 3.014938 |
| 14961 | ZNF189   | 828.3815 | 0.25175  | 0.13668  | 1.841885 | 0.065492 | 0.116376 | 709.5911 | 858.3417 | 702.6887 | 819.1906 | 934.7914 | 945.6857 |
| 24563 | LOC10321 | 10.10908 | 0.251642 | 0.781205 | 0.32212  | 0.747362 | 0.808884 | 8.131296 | 10.94824 | 8.348776 | 15.62489 | 8.556443 | 9.044815 |
| 11039 | LOC10323 | 5638.635 | 0.251578 | 0.09603  | 2.619791 | 0.008798 | 0.021189 | 5230.591 | 5463.717 | 4753.932 | 5852.637 | 6072.935 | 6457.998 |
| 16373 | ZNF10    | 336.1933 | 0.251423 | 0.15777  | 1.593599 | 0.111026 | 0.180274 | 306.8209 | 324.6152 | 290.8157 | 354.9082 | 355.0924 | 384.9071 |
| 20419 | NOTCH4   | 163.5733 | 0.251235 | 0.262122 | 0.958469 | 0.337826 | 0.439828 | 143.1108 | 110.5772 | 193.4133 | 200.8914 | 179.6853 | 153.7619 |
| 23385 | PTPN6    | 25.11618 | 0.251154 | 0.501046 | 0.501259 | 0.616189 | 0.700508 | 18.97302 | 22.9913  | 27.13352 | 26.78552 | 25.66933 | 29.1444  |
| 20977 | LOC11962 | 169.7912 | 0.251012 | 0.284621 | 0.881917 | 0.377822 | 0.478829 | 114.9223 | 226.0811 | 123.8402 | 176.338  | 194.6591 | 182.9063 |
| 12085 | TMEM184  | 3798.468 | 0.251002 | 0.10502  | 2.390038 | 0.016847 | 0.037057 | 3437.912 | 3395.595 | 3580.929 | 4046.846 | 3732.748 | 4596.776 |
| 13933 | FSD1L    | 1133.942 | 0.250769 | 0.123808 | 2.025468 | 0.042819 | 0.081698 | 1026.169 | 1127.668 | 957.3264 | 1174.099 | 1163.676 | 1354.712 |
| 9729  | NMD3     | 5643.728 | 0.25075  | 0.085837 | 2.921236 | 0.003486 | 0.009527 | 5240.349 | 4918.495 | 5302.865 | 6078.082 | 6333.907 | 5988.673 |
| 13795 | ORMDL3   | 1312.443 | 0.250692 | 0.122432 | 2.047607 | 0.040599 | 0.078239 | 1275.529 | 1101.94  | 1224.487 | 1343.74  | 1339.083 | 1589.878 |
| 15834 | AKAP7    | 393.2271 | 0.250629 | 0.14802  | 1.693206 | 0.090416 | 0.151807 | 363.74   | 367.3133 | 344.387  | 428.5684 | 451.3524 | 404.0017 |
| 15632 | BRCC3    | 2069.269 | 0.250545 | 0.145031 | 1.727531 | 0.084072 | 0.143097 | 1719.498 | 2339.638 | 1612.01  | 2116.056 | 2271.736 | 2356.677 |
| 13700 | ACVR1    | 1075.983 | 0.250522 | 0.121139 | 2.068057 | 0.038635 | 0.074971 | 916.6681 | 1089.897 | 943.4117 | 1178.563 | 1112.338 | 1215.02  |
| 14030 | F11R     | 716.7429 | 0.250503 | 0.124776 | 2.00763  | 0.044683 | 0.084668 | 667.8504 | 655.7994 | 644.2472 | 732.1376 | 757.2452 | 843.1778 |
| 13985 | COX5B    | 4016.03  | 0.250299 | 0.124326 | 2.013242 | 0.044089 | 0.083812 | 3940.968 | 3024.998 | 4040.808 | 4540.146 | 4126.344 | 4422.915 |
| 11827 | INPP4A   | 1489.444 | 0.250243 | 0.102458 | 2.442397 | 0.01459  | 0.032796 | 1310.765 | 1414.512 | 1359.459 | 1553.56  | 1615.029 | 1683.341 |
| 23208 | NR4A2    | 38.21399 | 0.250197 | 0.473631 | 0.528252 | 0.597324 | 0.684241 | 33.06727 | 37.224   | 32.69937 | 60.26743 | 44.92132 | 21.10457 |
| 18615 | SATB2    | 287.977  | 0.250134 | 0.202549 | 1.234928 | 0.216857 | 0.309867 | 235.8076 | 325.71   | 228.1999 | 274.5516 | 337.9795 | 325.6133 |
| 15304 | UACA     | 3860.163 | 0.249867 | 0.140458 | 1.778945 | 0.075249 | 0.130717 | 3146.811 | 4406.118 | 3027.127 | 4138.363 | 4173.405 | 4269.153 |
| 16256 | NIT2     | 2218.278 | 0.249649 | 0.154515 | 1.615697 | 0.10616  | 0.173613 | 2331.513 | 1527.826 | 2224.253 | 2348.198 | 2258.901 | 2618.976 |
| 21979 | LOC10322 | 56.04729 | 0.249602 | 0.341287 | 0.731353 | 0.464563 | 0.561919 | 53.66655 | 47.07742 | 52.17985 | 69.19594 | 59.8951  | 54.26889 |
| 21678 | ZNF550   | 72.47014 | 0.249439 | 0.31976  | 0.780083 | 0.435342 | 0.533886 | 54.20864 | 76.09024 | 68.87741 | 87.05295 | 64.17332 | 84.41828 |
| 18029 | LOC10323 | 451.5856 | 0.24936  | 0.186323 | 1.338324 | 0.180791 | 0.2666   | 335.5515 | 518.9464 | 384.0437 | 455.3539 | 509.1083 | 506.5097 |
| 24304 | LOC11962 | 15.6657  | 0.24913  | 0.690232 | 0.360936 | 0.718147 | 0.785515 | 17.88885 | 10.94824 | 13.2189  | 26.78552 | 17.11289 | 8.039836 |
| 13034 | LOC11962 | 1069.683 | 0.249018 | 0.113274 | 2.19838  | 0.027922 | 0.05696  | 987.6814 | 938.2638 | 1006.723 | 1243.295 | 1082.39  | 1159.746 |
| 17986 | LOC11962 | 276.537  | 0.248948 | 0.18496  | 1.345956 | 0.178317 | 0.263569 | 245.023  | 231.5552 | 279.684  | 345.9797 | 286.6408 | 270.3395 |
| 18405 | RHBDD3   | 695.3094 | 0.248903 | 0.196918 | 1.263991 | 0.206233 | 0.297908 | 763.2576 | 452.1622 | 694.3399 | 651.7811 | 737.9932 | 872.3222 |
| 13482 | CPNE8    | 1236.143 | 0.248874 | 0.117904 | 2.110826 | 0.034787 | 0.068597 | 1063.031 | 1246.457 | 1079.775 | 1267.848 | 1416.091 | 1343.658 |
| 15378 | TBC1D24  | 605.3096 | 0.248571 | 0.140921 | 1.763904 | 0.077748 | 0.134409 | 585.9954 | 509.6404 | 568.4125 | 631.6919 | 607.5074 | 728.6101 |
| 18035 | PDE4A    | 232.6755 | 0.248206 | 0.185658 | 1.336901 | 0.181255 | 0.267184 | 211.9558 | 222.7966 | 202.4578 | 232.1412 | 284.5017 | 242.2001 |
| 19351 | RIPK4    | 212.5407 | 0.248166 | 0.220299 | 1.126499 | 0.259954 | 0.357133 | 213.982  | 164.771  | 208.0237 | 203.1236 | 205.3546 | 280.3893 |
| 22473 | PLB1     | 50.06509 | 0.248018 | 0.385418 | 0.643505 | 0.519897 | 0.615025 | 39.03022 | 49.81448 | 48.7012  | 69.19594 | 36.36488 | 57.28383 |
| 10425 | UHRF1BP1 | 5112.168 | 0.248016 | 0.089827 | 2.761057 | 0.005761 | 0.014692 | 4622.37  | 4920.685 | 4480.51  | 5283.445 | 5670.782 | 5695.219 |
| 15948 | RRS1     | 679.4572 | 0.247588 | 0.14768  | 1.676514 | 0.093638 | 0.156094 | 578.9482 | 684.8122 | 605.2863 | 674.1023 | 682.3763 | 851.2176 |
| 10519 | RIDA     | 2686.229 | 0.247587 | 0.090365 | 2.739863 | 0.006146 | 0.015534 | 2464.867 | 2538.349 | 2366.878 | 2870.515 | 2907.051 | 2969.714 |
| 14887 | MLF2     | 6599.207 | 0.247472 | 0.133245 | 1.857266 | 0.063273 | 0.112993 | 5314.615 | 7439.327 | 5348.783 | 7374.948 | 7001.309 | 7116.26  |
| 9965  | MTF      | 5461.217 | 0.24746  | 0.08617  | 2.871761 | 0.004082 | 0.01089  | 4769.276 | 5248.584 | 4962.652 | 5962.011 | 5978.814 | 5845.966 |
| 11061 | PSMD1    | 11729.13 | 0.247433 | 0.094701 | 2.612782 | 0.008981 | 0.021581 | 10296.39 | 11778.11 | 10104.8  | 12736.52 | 12297.75 | 13161.21 |
| 24505 | LOC11962 | 12.67841 | 0.24739  | 0.748952 | 0.330315 | 0.741162 | 0.804063 | 16.26259 | 8.758589 | 9.044508 | 17.85702 | 17.11289 | 7.034856 |
| 25713 | LOC11962 | 1.631788 | 0.247276 | 1.858447 | 0.133055 | 0.89415  | 0.92444  | 1.084173 | 0.547412 | 2.782925 | 2.232127 | 2.139111 | 1.004979 |
| 13502 | NT5C3A   | 1822.44  | 0.246883 | 0.117204 | 2.106448 | 0.035165 | 0.069234 | 1601.323 | 1800.437 | 1592.529 | 2042.396 | 2141.25  | 1756.704 |
| 11839 | LOC10323 | 1555.081 | 0.246876 | 0.101216 | 2.439095 | 0.014724 | 0.033064 | 1426.771 | 1492.245 | 1347.632 | 1671.863 | 1700.593 | 1691.38  |
| 15399 | SYTL4    | 486.7457 | 0.246859 | 0.140284 | 1.759708 | 0.078457 | 0.135451 | 451.5579 | 440.1191 | 447.3553 | 491.0679 | 515.5257 | 574.8483 |
| 14415 | SLC35B2  | 3947.636 | 0.246838 | 0.127189 | 1.940729 | 0.052291 | 0.096438 | 3953.436 | 3099.993 | 3785.474 | 4011.132 | 3961.633 | 4874.15  |
| 10676 | PPP6R1   | 6857.805 | 0.246784 | 0.091463 | 2.698176 | 0.006972 | 0.017362 | 6095.219 | 6394.317 | 6333.243 | 7622.714 | 6849.432 | 7851.905 |
| 24985 | TRNAQ-CU | 6.157917 | 0.246726 | 0.994868 | 0.247999 | 0.804135 | 0.855631 | 4.878777 | 4.926706 | 6.957314 | 4.464254 | 10.69555 | 5.024897 |
| 12798 | CFL2     | 1348.99  | 0.246723 | 0.110143 | 2.240024 | 0.052089 | 0.052118 | 1220.779 | 1152.302 | 1327.455 | 1455.347 | 1523.047 | 1415.011 |
| 19004 | LOC10324 | 292.7395 | 0.246532 | 0.208193 | 1.184149 | 0.236354 | 0.330636 | 286.2216 | 204.1846 | 314.4706 | 276.7837 | 340.1186 | 334.6582 |
| 15657 | GYG1     | 916.306  | 0.2464   | 0.142943 | 1.723764 | 0.08475  | 0.143903 | 910.7051 | 693.5708 | 912.7996 | 937.4933 | 1001.104 | 1042.164 |
| 17974 | LOC11962 | 342.8052 | 0.246357 | 0.182787 | 1.347779 | 0.177729 | 0.262876 | 378.3763 | 268.2318 | 293.5986 | 386.158  | 363.6488 | 366.8175 |
| 17198 | OSCP1    | 379.1806 | 0.246271 | 0.167786 | 1.467769 | 0.142167 | 0.219732 | 384.3392 | 327.3523 | 332.5596 | 386.158  | 374.3444 | 470.3304 |
| 12810 | ZNF398   | 2057.397 | 0.246225 | 0.110102 | 2.236343 | 0.025329 | 0.052567 | 1826.289 | 2052.247 | 1772.724 | 2127.217 | 2151.945 | 2413.961 |
| 13652 | PPT2     | 1159.465 | 0.24615  | 0.118428 | 2.07847  | 0.037666 | 0.073348 | 1150.307 | 1008.333 | 1027.595 | 1229.902 | 1182.928 | 1357.727 |
| 24570 | LOC11962 | 12.6534  | 0.246134 | 0.767396 | 0.320739 | 0.748408 | 0.809752 | 12.46799 | 7.116354 | 14.61036 | 11.16063 | 23.53022 | 7.034856 |
| 14381 | MSN      | 25446.11 | 0.246066 | 0.126315 | 1.948034 | 0.051411 | 0.095039 | 20892.01 | 28138.61 | 20815.59 | 27307.84 | 26107.85 | 29414.74 |
| 25329 | LOC10322 | 4.537538 | 0.246033 | 1.259842 | 0.195288 | 0.845167 | 0.887077 | 1.626259 | 9.306001 | 1.391463 | 4.464254 | 6.417332 | 4.019918 |
| 25821 | LOC11962 | 1.327698 | 0.245997 | 2.089086 | 0.117753 | 0.906263 | 0.933078 | 0.542086 | 1.094824 | 2.087194 | 2.232127 | 0        | 2.009959 |
| 11466 | DDHD2    | 2335.516 | 0.245709 | 0.097367 | 2.523521 | 0.011619 | 0.026941 | 2134.194 | 2213.733 | 2067.714 | 2397.304 | 2519.872 | 2680.28  |
| 19102 | TEX22    | 243.9087 | 0.245537 | 0.209927 | 1.169635 | 0.242148 | 0.336989 | 249.3597 | 171.3399 | 248.3761 | 279.0159 | 263.1106 | 252.2498 |
| 20724 | AIF1L    | 97.175   | 0.245393 | 0.268233 | 0.91485  | 0.36027  | 0.462159 | 88.36008 | 91.96518 | 84.87923 | 118.3027 | 109.0946 | 90.44815 |
| 16239 | LOC11962 | 1269.364 | 0.245321 | 0.151564 | 1.618594 | 0.105535 | 0.172761 | 1320.522 | 918.557  | 1248.838 | 1388.383 | 1253.519 | 1486.365 |
| 22991 | CUNH1orf | 39.57622 | 0.245122 | 0.43387  | 0.564965 | 0.572097 | 0.6615   | 26.02015 | 41.6033  | 40.35242 | 55.80317 | 38.50399 | 35.17428 |
| 25270 | LOC11962 | 4.20519  | 0.245105 | 1.203061 | 0.203734 | 0.838561 | 0.882202 | 5.96295  | 3.284471 | 2.087194 | 4.464254 | 6.417332 | 3.014938 |
| 23487 | NXN1L2   | 27.67885 | 0.245089 | 0.503813 | 0.486469 | 0.626635 | 0.709219 | 34.15144 | 22.44388 | 18.78475 | 33.4819  | 32.08666 | 25.12449 |
| 14759 | SRP54    | 5655.852 | 0.245    | 0.130324 | 1.879928 | 0.060118 | 0.108289 | 4656.522 | 6308.374 | 4563.302 | 6366.026 | 6079.353 | 5961.538 |
| 12734 | FAM234A  | 4949.665 | 0.244989 | 0.108813 | 2.251478 | 0.024355 | 0.050847 | 4816.437 | 4133.507 | 4648.181 | 5209.784 | 4945.624 | 5944.454 |
| 22501 | LOC11962 | 61.69222 | 0.244796 | 0.382993 | 0.639167 | 0.522714 | 0.6176   |          |          |          |          |          |          |



|       |           |          |          |          |          |          |          |          |          |          |          |          |          |
|-------|-----------|----------|----------|----------|----------|----------|----------|----------|----------|----------|----------|----------|----------|
| 17802 | OPA3      | 340.9138 | 0.244082 | 0.177293 | 1.376711 | 0.168602 | 0.252436 | 294.3529 | 362.934  | 278.9883 | 401.7829 | 331.5622 | 375.8623 |
| 28236 | LOC119615 | 0.627562 | 0.243981 | 3.753982 | 0.064993 | 0.94818  | NA       | 1.626259 | 0        | 0        | 0        | 2.139111 | 0        |
| 28766 | LOC119621 | 0.627562 | 0.243981 | 3.753982 | 0.064993 | 0.94818  | NA       | 1.626259 | 0        | 0        | 0        | 2.139111 | 0        |
| 16165 | FAM162A   | 2395.828 | 0.243972 | 0.149372 | 1.633319 | 0.102402 | 0.168411 | 2311.998 | 1670.701 | 2598.557 | 2613.821 | 2650.358 | 2529.533 |
| 14153 | BCAT2     | 2000.953 | 0.243933 | 0.122884 | 1.985071 | 0.047137 | 0.088541 | 1905.976 | 1628.55  | 1967.528 | 2169.627 | 1940.173 | 2393.861 |
| 11378 | RALB      | 1968.013 | 0.243791 | 0.095895 | 2.542252 | 0.011014 | 0.025735 | 1747.686 | 1880.36  | 1779.681 | 2151.77  | 2072.798 | 2175.781 |
| 17030 | HXA9      | 773.0967 | 0.243543 | 0.163528 | 1.489301 | 0.136408 | 0.212942 | 634.2411 | 871.4796 | 618.5052 | 749.9947 | 909.122  | 855.2375 |
| 20692 | LOC119621 | 103.029  | 0.243517 | 0.263719 | 0.923397 | 0.3558   | 0.457172 | 89.44425 | 108.3875 | 85.57496 | 102.6778 | 115.512  | 116.5776 |
| 12138 | PRKAG1    | 2845.918 | 0.243379 | 0.102317 | 2.378677 | 0.017375 | 0.038052 | 2472.998 | 2866.796 | 2476.804 | 3116.049 | 3153.049 | 2989.814 |
| 10763 | SUCLG1    | 4112.28  | 0.243339 | 0.090899 | 2.677703 | 0.007428 | 0.018347 | 3963.736 | 3543.397 | 3789.649 | 4473.182 | 4554.167 | 4349.551 |
| 12263 | DLST      | 6305.342 | 0.243131 | 0.103325 | 2.353061 | 0.01862  | 0.040362 | 5948.314 | 6034.12  | 5349.479 | 6685.22  | 6299.681 | 7515.236 |
| 24188 | LOC119621 | 16.86956 | 0.242981 | 0.645971 | 0.376149 | 0.706806 | 0.77685  | 11.9259  | 20.80165 | 13.2189  | 13.39276 | 27.80844 | 14.06971 |
| 14945 | NCK1      | 1876.296 | 0.242779 | 0.131482 | 1.846482 | 0.064822 | 0.115309 | 1556.872 | 2027.613 | 1568.874 | 2008.914 | 2184.032 | 1911.471 |
| 13421 | ABR       | 7154.583 | 0.242573 | 0.114271 | 2.122787 | 0.033772 | 0.066897 | 6154.307 | 7439.874 | 6073.735 | 7718.695 | 7089.013 | 8451.877 |
| 21944 | LOC103221 | 107.3944 | 0.242334 | 0.328783 | 0.737062 | 0.461085 | 0.558601 | 130.6428 | 58.02565 | 107.1426 | 113.8385 | 109.0946 | 125.6224 |
| 16114 | FRMD8     | 1885.221 | 0.242292 | 0.147476 | 1.642921 | 0.100399 | 0.165639 | 1958.016 | 1380.025 | 1848.558 | 1892.844 | 1929.478 | 2302.408 |
| 23626 | ENO4      | 25.42371 | 0.241991 | 0.520092 | 0.465286 | 0.641727 | 0.722101 | 24.39389 | 26.82318 | 19.48048 | 17.85702 | 27.80844 | 36.17926 |
| 13049 | NFX1      | 2131.402 | 0.241989 | 0.110188 | 2.196139 | 0.028082 | 0.057212 | 1892.966 | 2166.656 | 1799.857 | 2381.679 | 2192.588 | 2354.667 |
| 24532 | LOC119621 | 11.08384 | 0.24194  | 0.74314  | 0.325564 | 0.744754 | 0.80708  | 12.46799 | 9.853413 | 8.348776 | 8.928508 | 12.83466 | 14.06971 |
| 12428 | ABHD12    | 3449.548 | 0.241929 | 0.104468 | 2.315816 | 0.020568 | 0.043998 | 3307.269 | 3052.916 | 3130.095 | 3602.653 | 3456.803 | 4147.55  |
| 21055 | PIK3C2G   | 96.49502 | 0.241901 | 0.27736  | 0.872152 | 0.383125 | 0.483751 | 78.06044 | 100.7238 | 85.57496 | 98.21359 | 121.9293 | 94.46807 |
| 13994 | MYO6      | 2535.895 | 0.241688 | 0.12014  | 2.011723 | 0.044249 | 0.084069 | 2161.298 | 2660.421 | 2153.289 | 2529     | 2780.844 | 2930.52  |
| 14112 | FAM219B   | 1292.093 | 0.241036 | 0.121025 | 1.991625 | 0.046412 | 0.087441 | 1231.135 | 1112.341 | 1194.571 | 1412.936 | 1244.962 | 1536.614 |
| 12119 | VPS29     | 2647.732 | 0.240811 | 0.101106 | 2.381772 | 0.01723  | 0.037796 | 2331.513 | 2542.728 | 2402.36  | 2868.283 | 3080.319 | 2661.186 |
| 13284 | CAPN7     | 3947.439 | 0.240565 | 0.111825 | 2.151265 | 0.031455 | 0.062941 | 3454.716 | 4131.317 | 3272.72  | 4232.113 | 4147.736 | 4446.029 |
| 17824 | TCEA2     | 553.9176 | 0.240487 | 0.175136 | 1.373142 | 0.169708 | 0.253125 | 595.2108 | 405.6322 | 525.9729 | 551.3354 | 569.0034 | 676.3512 |
| 12040 | AFTPH     | 2636.705 | 0.240432 | 0.100222 | 2.398999 | 0.01644  | 0.0363   | 2337.476 | 2630.861 | 2284.782 | 2774.534 | 2894.217 | 2898.361 |
| 15259 | TMLHE     | 908.4277 | 0.240418 | 0.134594 | 1.786247 | 0.074059 | 0.12903  | 803.9141 | 940.4535 | 756.9557 | 982.1359 | 904.8438 | 1062.263 |
| 25080 | LOC103221 | 6.458242 | 0.240311 | 1.028656 | 0.233616 | 0.815283 | 0.864172 | 5.96295  | 8.211177 | 3.478657 | 2.232127 | 12.83466 | 6.029877 |
| 13400 | XPC       | 2992.735 | 0.240174 | 0.112896 | 2.127383 | 0.033388 | 0.066241 | 2582.499 | 3124.627 | 2527.592 | 3140.603 | 3187.275 | 3393.816 |
| 25895 | TRNAK-UU  | 1.325923 | 0.240168 | 2.287178 | 0.105006 | 0.916371 | 0.940822 | 1.626259 | 0        | 2.087194 | 2.232127 | 0        | 2.009959 |
| 25206 | GMCL2     | 4.925597 | 0.239916 | 1.121012 | 0.214018 | 0.830533 | 0.875971 | 4.878777 | 6.02153  | 2.782925 | 6.696381 | 2.139111 | 7.034856 |
| 14539 | MEF2A     | 4996.468 | 0.239866 | 0.125029 | 1.91849  | 0.055049 | 0.100659 | 4207.132 | 5480.687 | 4059.593 | 5334.783 | 5253.656 | 5642.96  |
| 17653 | LOC103231 | 398.1756 | 0.239662 | 0.171676 | 1.396013 | 0.162711 | 0.245038 | 313.868  | 313.9079 | 348.5614 | 446.4254 | 434.2395 | 414.0515 |
| 17621 | AMOT      | 940.6101 | 0.239516 | 0.170927 | 1.401275 | 0.161132 | 0.24309  | 697.6652 | 1081.138 | 811.9185 | 897.315  | 1031.051 | 1124.572 |
| 11467 | CCDC115   | 2800.972 | 0.239333 | 0.094853 | 2.523213 | 0.011629 | 0.02696  | 2505.523 | 2721.184 | 2482.37  | 3082.567 | 2902.773 | 3111.416 |
| 25099 | LOC119621 | 5.847071 | 0.239197 | 1.038853 | 0.230251 | 0.817897 | 0.866321 | 3.794605 | 8.758589 | 3.478657 | 4.464254 | 8.556443 | 6.029877 |
| 15001 | LOC119621 | 1358.555 | 0.239162 | 0.13048  | 1.832936 | 0.066812 | 0.118405 | 1209.395 | 1087.707 | 1443.643 | 1499.989 | 1401.117 | 1509.479 |
| 12599 | SLC30A1   | 4642.707 | 0.239155 | 0.104708 | 2.284006 | 0.022371 | 0.047205 | 4100.883 | 4727.996 | 3951.058 | 4819.162 | 4915.676 | 5341.466 |
| 10026 | DYNC112   | 6217.352 | 0.239143 | 0.083749 | 2.855479 | 0.040297 | 0.011394 | 5756.415 | 5834.315 | 5521.324 | 6772.273 | 6496.479 | 6923.304 |
| 25336 | LOC119621 | 4.239329 | 0.238928 | 1.238144 | 0.192972 | 0.846981 | 0.888735 | 4.878777 | 1.094824 | 5.565851 | 4.464254 | 6.417332 | 3.014938 |
| 18030 | ZNF444    | 326.1012 | 0.238861 | 0.178569 | 1.337645 | 0.181012 | 0.2669   | 267.2486 | 328.4471 | 298.4688 | 372.7652 | 387.179  | 302.4988 |
| 15676 | POLD4     | 1723.051 | 0.238849 | 0.138726 | 1.721733 | 0.085118 | 0.144352 | 1676.131 | 1268.901 | 1797.77  | 1933.022 | 1803.27  | 1859.212 |
| 13653 | SLC35A4   | 1580.703 | 0.238831 | 0.114927 | 2.078115 | 0.037699 | 0.073402 | 1362.263 | 1565.05  | 1428.337 | 1656.238 | 1600.055 | 1872.277 |
| 14626 | ADH5      | 3467.776 | 0.238753 | 0.125478 | 1.902744 | 0.057074 | 0.103741 | 3386.414 | 2609.512 | 3550.317 | 3787.919 | 3636.488 | 3836.007 |
| 24802 | LOC119621 | 8.159055 | 0.238645 | 0.851089 | 0.2804   | 0.779171 | 0.835178 | 6.505036 | 7.663765 | 8.348776 | 6.696381 | 10.69555 | 9.044815 |
| 17571 | KMT2E     | 1258.61  | 0.238268 | 0.16963  | 1.404637 | 0.160129 | 0.242263 | 1004.486 | 1513.046 | 946.8904 | 1374.99  | 1328.388 | 1383.857 |
| 10933 | EIF4E2    | 3202.47  | 0.238197 | 0.090101 | 2.64367  | 0.008201 | 0.019942 | 2882.273 | 3090.14  | 2842.063 | 3450.868 | 3529.533 | 3419.945 |
| 12871 | SMURF1    | 2485.82  | 0.237838 | 0.106928 | 2.224293 | 0.026129 | 0.053969 | 2255.621 | 2438.72  | 2154.68  | 2662.927 | 2483.507 | 2919.465 |
| 25173 | ZNF433    | 5.198351 | 0.237831 | 1.089437 | 0.218306 | 0.82719  | 0.873601 | 2.710432 | 6.568942 | 4.87012  | 4.464254 | 8.556443 | 4.019918 |
| 18325 | LOC103231 | 281.5363 | 0.237663 | 0.185812 | 1.279051 | 0.200879 | 0.291425 | 234.1813 | 297.2446 | 241.4188 | 314.7299 | 327.2839 | 274.3594 |
| 23624 | LOC103211 | 26.50699 | 0.23742  | 0.510063 | 0.465472 | 0.641594 | 0.72201  | 19.51511 | 29.01283 | 23.65487 | 37.94616 | 27.80844 | 21.10457 |
| 13165 | SECISBP2L | 3929.398 | 0.237377 | 0.108995 | 2.177862 | 0.029416 | 0.059402 | 3395.629 | 4106.136 | 3319.334 | 4218.72  | 4199.074 | 4337.491 |
| 13090 | EFL1      | 5460.91  | 0.237339 | 0.108417 | 2.189128 | 0.028588 | 0.058059 | 4745.424 | 5621.919 | 4675.315 | 5658.442 | 5685.756 | 6378.605 |
| 16350 | NUMBL     | 636.1621 | 0.237159 | 0.148604 | 1.595916 | 0.110508 | 0.179685 | 527.9921 | 611.459  | 617.8095 | 647.3168 | 622.4812 | 789.9139 |
| 25283 | LOC119621 | 6.318704 | 0.237057 | 1.174361 | 0.20186  | 0.840026 | 0.883285 | 4.878777 | 4.379295 | 7.653045 | 17.5702  | 2.139111 | 1.004979 |
| 23416 | LOC103231 | 41.35022 | 0.23704  | 0.477156 | 0.496777 | 0.619347 | 0.703166 | 41.74065 | 27.37059 | 43.13534 | 60.26743 | 53.47777 | 22.10955 |
| 24211 | LOC119621 | 23.86017 | 0.237025 | 0.63723  | 0.371961 | 0.709922 | 0.779533 | 27.10432 | 7.663765 | 30.61218 | 22.32127 | 36.36488 | 19.09461 |
| 15680 | ZNF329    | 482.3966 | 0.236833 | 0.137626 | 1.72084  | 0.08528  | 0.14459  | 452.1    | 428.6235 | 445.9638 | 553.5675 | 517.6648 | 496.4599 |
| 16948 | LMF1      | 463.0162 | 0.236763 | 0.157875 | 1.499681 | 0.133697 | 0.20972  | 460.2313 | 375.5245 | 443.1809 | 466.5145 | 474.8826 | 557.7636 |
| 14122 | CUNH6orf1 | 1575.164 | 0.236759 | 0.11889  | 1.989902 | 0.046602 | 0.087729 | 1554.704 | 1376.741 | 1411.639 | 1736.595 | 1508.073 | 1863.232 |
| 14457 | OBSL1     | 1930.45  | 0.236499 | 0.122352 | 1.932946 | 0.053243 | 0.097908 | 1827.915 | 1614.317 | 1882.649 | 1982.129 | 1905.948 | 2369.742 |
| 23123 | ZCWPW2    | 42.38976 | 0.236443 | 0.437724 | 0.540164 | 0.589084 | 0.677277 | 41.19856 | 41.05589 | 33.39511 | 71.42806 | 32.08666 | 35.17428 |
| 20799 | LOC119621 | 130.5147 | 0.236404 | 0.261365 | 0.904498 | 0.365732 | 0.467473 | 129.5586 | 124.8099 | 102.2725 | 158.481  | 160.4333 | 107.5328 |
| 24946 | OTOP2     | 7.844898 | 0.236272 | 0.923265 | 0.255909 | 0.798021 | 0.850453 | 4.336691 | 7.116354 | 9.740239 | 11.16063 | 10.69555 | 4.019918 |
| 14387 | RPUSD4    | 1046.103 | 0.235843 | 0.121162 | 1.946505 | 0.051594 | 0.095338 | 1016.412 | 944.2854 | 926.0185 | 1124.992 | 1026.773 | 1238.135 |
| 17629 | REEP6     | 287.8445 | 0.235495 | 0.168047 | 1.401361 | 0.161106 | 0.24309  | 252.0702 | 258.9258 | 281.7712 | 299.105  | 333.7013 | 301.4938 |
| 15588 | USP30     | 851.043  | 0.235464 | 0.135996 | 1.731407 | 0.083379 | 0.142201 | 701.4598 | 892.8287 | 752.0856 | 941.9576 | 864.2007 | 953.7255 |
| 15373 | KIF16B    | 1963.318 | 0.235303 | 0.133313 | 1.765038 | 0.077557 | 0.134122 | 1659.868 | 2149.686 | 1602.269 | 2167.395 | 1978.677 | 2222.01  |
| 24158 | CHRM2     | 16.96463 | 0.235171 | 0.616881 | 0.381225 | 0.703036 | 0.773634 | 15.17842 | 14.23271 | 16.69755 | 20.08914 | 23.53    |          |



|       |           |          |          |          |          |          |          |          |          |          |          |          |          |
|-------|-----------|----------|----------|----------|----------|----------|----------|----------|----------|----------|----------|----------|----------|
| 20916 | LOC103240 | 107.8407 | 0.234318 | 0.263455 | 0.889404 | 0.373786 | 0.475096 | 89.98634 | 110.0298 | 96.01093 | 111.6063 | 136.9031 | 102.5079 |
| 20643 | UCP2      | 113.0433 | 0.234309 | 0.252239 | 0.928916 | 0.352932 | 0.454468 | 102.4543 | 112.2194 | 98.09812 | 124.9991 | 104.8164 | 135.6722 |
| 25770 | LOC119624 | 1.63478  | 0.2343   | 1.886433 | 0.124203 | 0.901155 | 0.929655 | 2.168345 | 1.094824 | 1.391463 | 0        | 2.139111 | 3.014938 |
| 13656 | MGAT5     | 6210.197 | 0.234285 | 0.11282  | 2.076637 | 0.037835 | 0.073656 | 5478.325 | 6345.598 | 5302.169 | 6736.559 | 6028.014 | 7370.519 |
| 12940 | CYP4V2    | 1658.606 | 0.234278 | 0.105758 | 2.215217 | 0.026745 | 0.054943 | 1510.253 | 1631.287 | 1430.424 | 1720.97  | 1873.861 | 1784.844 |
| 16002 | ZNF226    | 628.5343 | 0.23412  | 0.140621 | 1.664902 | 0.095932 | 0.159378 | 567.0223 | 641.5666 | 523.8857 | 725.4413 | 628.8985 | 684.391  |
| 22793 | LOC103216 | 47.1652  | 0.233677 | 0.393557 | 0.593756 | 0.552675 | 0.644622 | 55.8349  | 34.48694 | 55.3242  | 49.10679 | 44.92132 | 58.28881 |
| 20607 | LOC119626 | 122.3478 | 0.233598 | 0.249629 | 0.935782 | 0.349385 | 0.45074  | 126.3061 | 108.3875 | 100.881  | 140.624  | 143.3204 | 114.5677 |
| 24140 | LOC103224 | 17.62001 | 0.233596 | 0.608245 | 0.384049 | 0.700942 | 0.771936 | 17.88885 | 12.59047 | 18.08902 | 13.39276 | 25.66933 | 18.08963 |
| 24142 | ACTL7B    | 18.00131 | 0.233291 | 0.607857 | 0.383792 | 0.701133 | 0.772073 | 19.51511 | 14.78012 | 14.61036 | 26.78552 | 19.252   | 13.06473 |
| 14983 | ZNF526    | 631.0849 | 0.233278 | 0.126976 | 1.837189 | 0.066182 | 0.11743  | 585.9954 | 582.9936 | 574.6741 | 662.9417 | 650.2896 | 729.6151 |
| 25727 | LOC119627 | 2.284069 | 0.23325  | 1.785871 | 0.130609 | 0.896085 | 0.925964 | 2.710432 | 0        | 3.478657 | 2.232127 | 4.278221 | 1.004979 |
| 14891 | PGAP2     | 1172.662 | 0.233084 | 0.12558  | 1.856058 | 0.063445 | 0.113269 | 1160.607 | 983.1516 | 1095.777 | 1227.67  | 1165.815 | 1402.951 |
| 22629 | LOC119627 | 49.23078 | 0.232896 | 0.376234 | 0.619021 | 0.535903 | 0.629561 | 43.909   | 41.6033  | 49.39693 | 69.19594 | 47.06043 | 44.2191  |
| 20008 | LOC103225 | 157.4164 | 0.232833 | 0.226476 | 1.028068 | 0.303918 | 0.403822 | 136.6058 | 130.8314 | 165.5841 | 189.7308 | 168.9897 | 152.7569 |
| 12847 | CREB3     | 2999.627 | 0.232797 | 0.104428 | 2.229256 | 0.025797 | 0.053383 | 2938.108 | 2589.805 | 2751.618 | 3236.584 | 2988.338 | 3493.309 |
| 16407 | FOXRED2   | 646.126  | 0.232736 | 0.146631 | 1.587226 | 0.112461 | 0.182215 | 568.1065 | 660.1786 | 557.9766 | 685.263  | 620.3421 | 784.889  |
| 24230 | LOC119628 | 19.19655 | 0.232363 | 0.627814 | 0.370114 | 0.711297 | 0.780431 | 19.51511 | 18.612   | 13.91463 | 17.85702 | 34.22577 | 11.05477 |
| 17266 | THAP1     | 585.5518 | 0.232026 | 0.159313 | 1.456416 | 0.145278 | 0.223689 | 481.9148 | 640.4718 | 490.4906 | 660.7096 | 658.8461 | 580.8781 |
| 13800 | TMEM164   | 2428.923 | 0.231931 | 0.113311 | 2.046854 | 0.040672 | 0.078353 | 2199.786 | 2304.056 | 2204.773 | 2647.303 | 2293.127 | 2924.49  |
| 12712 | TGOLN2    | 3687.019 | 0.2319   | 0.102813 | 2.255542 | 0.024099 | 0.0504   | 3355.515 | 3669.301 | 3153.75  | 3823.634 | 3839.704 | 4280.208 |
| 11258 | TBC1D23   | 2754.386 | 0.231729 | 0.09022  | 2.568481 | 0.010215 | 0.024121 | 2611.772 | 2527.948 | 2461.498 | 2883.908 | 3050.372 | 2990.819 |
| 17314 | GAS2L1    | 753.6531 | 0.23163  | 0.160164 | 1.446205 | 0.14812  | 0.227432 | 734.527  | 564.929  | 784.785  | 754.4589 | 763.6625 | 919.5562 |
| 11803 | CSGALNAC  | 2378.308 | 0.231527 | 0.094573 | 2.448138 | 0.01436  | 0.032344 | 2202.497 | 2266.285 | 2097.63  | 2482.125 | 2554.098 | 2667.216 |
| 13776 | CHD4      | 17982.33 | 0.23139  | 0.112769 | 2.051887 | 0.040181 | 0.077541 | 15699.36 | 18795.93 | 15139.81 | 18865.94 | 18039.12 | 21353.8  |
| 11892 | COPA      | 16187.88 | 0.231324 | 0.095305 | 2.427184 | 0.015217 | 0.034017 | 15359.48 | 14781.21 | 14546.35 | 16678.45 | 16421.95 | 19339.82 |
| 23430 | CPT1C     | 37.79113 | 0.230999 | 0.466415 | 0.495265 | 0.620413 | 0.703956 | 34.15144 | 33.39212 | 36.17803 | 24.5534  | 66.31243 | 32.15934 |
| 23269 | KLHL32    | 32.67071 | 0.230992 | 0.44509  | 0.518978 | 0.603776 | 0.689819 | 30.35684 | 31.20247 | 27.82925 | 35.71403 | 42.78221 | 28.13943 |
| 20139 | ZNF500    | 141.5523 | 0.230796 | 0.229551 | 1.005424 | 0.314693 | 0.415418 | 143.1108 | 112.7668 | 134.9719 | 149.5525 | 156.1551 | 152.7569 |
| 19332 | TNFRSF9   | 195.9864 | 0.230661 | 0.204186 | 1.129659 | 0.25862  | 0.355649 | 192.9827 | 171.8873 | 178.803  | 198.6593 | 190.3808 | 243.205  |
| 14600 | TTC13     | 1552.979 | 0.23064  | 0.121025 | 1.905726 | 0.056686 | 0.103219 | 1325.401 | 1625.266 | 1338.587 | 1587.042 | 1689.897 | 1751.679 |
| 18565 | HELZ2     | 1303.103 | 0.230439 | 0.185704 | 1.24089  | 0.214647 | 0.307373 | 1348.711 | 845.7513 | 1406.769 | 1424.097 | 1189.346 | 1603.947 |
| 15176 | RABEP1    | 3726.255 | 0.230177 | 0.127815 | 1.800855 | 0.071726 | 0.125639 | 3042.731 | 4111.063 | 3136.357 | 4037.918 | 3839.704 | 4189.759 |
| 23889 | TRNAT-AG  | 22.72256 | 0.230134 | 0.542609 | 0.424124 | 0.671475 | 0.747255 | 19.51511 | 18.06459 | 25.04633 | 33.4819  | 17.11289 | 23.11453 |
| 16641 | HOXA10    | 381.0297 | 0.230101 | 0.148427 | 1.550265 | 0.121078 | 0.193429 | 349.6457 | 362.934  | 340.9084 | 392.8543 | 410.7092 | 429.1262 |
| 14098 | MTMR2     | 1789.004 | 0.229745 | 0.115181 | 1.99464  | 0.046082 | 0.086899 | 1515.673 | 1863.937 | 1561.221 | 1921.861 | 1916.643 | 1954.685 |
| 12970 | LOC103215 | 23815.25 | 0.229728 | 0.103986 | 2.209216 | 0.02716  | 0.05567  | 23278.81 | 20857.48 | 21641.42 | 24794.47 | 23438.24 | 28881.1  |
| 21380 | ALKAL2    | 95.26822 | 0.229726 | 0.28022  | 0.819806 | 0.412326 | 0.512689 | 81.31296 | 105.6505 | 75.83472 | 98.21359 | 109.0946 | 101.5029 |
| 14598 | LOC103233 | 698.5198 | 0.229647 | 0.120452 | 1.906545 | 0.05658  | 0.103039 | 654.8403 | 650.3252 | 624.7668 | 725.4413 | 767.9407 | 767.8043 |
| 13394 | LOC103228 | 4894.269 | 0.229607 | 0.107858 | 2.128791 | 0.033272 | 0.066039 | 4377.89  | 4724.711 | 4422.764 | 4839.251 | 5018.354 | 5982.643 |
| 12536 | RDH11     | 3843.089 | 0.229389 | 0.099928 | 2.295552 | 0.021701 | 0.046017 | 3702.45  | 3312.936 | 3604.584 | 4147.292 | 3848.26  | 4443.014 |
| 24455 | COL8A2    | 13.75336 | 0.22923  | 0.67997  | 0.337118 | 0.736028 | 0.800135 | 10.29964 | 12.59047 | 14.61036 | 17.85702 | 17.11289 | 10.04979 |
| 22979 | LOC119627 | 41.53768 | 0.229047 | 0.403345 | 0.567868 | 0.570124 | 0.659592 | 42.28274 | 32.2973  | 39.65669 | 40.17829 | 55.61688 | 39.1942  |
| 16936 | ZNF549    | 422.0366 | 0.229024 | 0.152527 | 1.501533 | 0.133218 | 0.209107 | 388.1338 | 417.1278 | 361.0846 | 410.7114 | 489.8563 | 465.3055 |
| 14083 | KLHL18    | 1280.411 | 0.22902  | 0.114668 | 1.997235 | 0.0458   | 0.086458 | 1189.337 | 1243.72  | 1108.3   | 1334.812 | 1304.858 | 1501.439 |
| 22343 | LOC103248 | 55.69315 | 0.228999 | 0.342735 | 0.668151 | 0.504037 | 0.599737 | 47.7036  | 55.83601 | 50.78839 | 51.33892 | 64.17332 | 64.31869 |
| 25864 | LOC119618 | 1.312196 | 0.228992 | 2.095768 | 0.109264 | 0.912993 | 0.938444 | 0.542086 | 1.094824 | 2.087194 | 0        | 2.139111 | 2.009959 |
| 17745 | CEP19     | 825.2997 | 0.228773 | 0.166107 | 1.377263 | 0.168431 | 0.252338 | 724.2274 | 948.1173 | 606.6778 | 874.9938 | 913.4003 | 884.3819 |
| 14165 | MARK2     | 1636.399 | 0.228558 | 0.115305 | 1.982204 | 0.047456 | 0.089062 | 1435.987 | 1617.054 | 1472.863 | 1772.309 | 1593.637 | 1926.546 |
| 14002 | PSP90AA1  | 32259.7  | 0.228456 | 0.113579 | 2.011434 | 0.04428  | 0.084069 | 27814.45 | 34768.31 | 26551.2  | 34180.56 | 33966.94 | 36276.74 |
| 13066 | PPP1R7    | 1681.154 | 0.228305 | 0.104068 | 2.193815 | 0.028249 | 0.057472 | 1509.168 | 1576.546 | 1564.004 | 1669.631 | 1846.053 | 1921.521 |
| 29562 | LOC119625 | 0.628449 | 0.228049 | 3.321017 | 0.068668 | 0.945254 | NA       | 1.084173 | 0.547412 | 0        | 0        | 2.139111 | 0        |
| 13796 | ADSS1     | 1162.003 | 0.22779  | 0.111259 | 2.04738  | 0.040621 | 0.078277 | 1115.072 | 1037.345 | 1063.078 | 1227.67  | 1187.206 | 1341.648 |
| 15955 | SLC25A15  | 541.4601 | 0.227711 | 0.135983 | 1.67455  | 0.094023 | 0.156665 | 488.4198 | 491.0284 | 519.7113 | 593.7458 | 534.7777 | 621.0773 |
| 13604 | RGP1      | 2806.521 | 0.227452 | 0.108904 | 2.088563 | 0.036747 | 0.071814 | 2429.089 | 2867.89  | 2464.281 | 2872.747 | 2969.086 | 3236.034 |
| 24355 | LOC119627 | 21.47662 | 0.227424 | 0.643859 | 0.353219 | 0.723924 | 0.790227 | 18.43094 | 27.37059 | 13.2189  | 40.17829 | 8.556443 | 21.10457 |
| 15809 | ZNF609    | 763.7606 | 0.227248 | 0.133716 | 1.699483 | 0.089228 | 0.150049 | 655.3824 | 799.2212 | 656.7704 | 812.4942 | 823.5576 | 835.1379 |
| 28265 | LOC119615 | 0.643952 | 0.227224 | 3.295554 | 0.068949 | 0.945031 | NA       | 1.084173 | 0.547412 | 0        | 2.232127 | 0        | 0        |
| 10698 | CYRIB     | 5112.943 | 0.226741 | 0.084208 | 2.692627 | 0.007089 | 0.017617 | 4623.997 | 4865.944 | 4642.615 | 5640.585 | 5550.992 | 5353.526 |
| 24398 | LOC103237 | 15.08072 | 0.226643 | 0.653144 | 0.347004 | 0.728588 | 0.793898 | 14.09425 | 17.51718 | 9.740239 | 20.08914 | 14.97377 | 14.06971 |
| 12201 | FBXO21    | 3654.73  | 0.22664  | 0.09578  | 2.366246 | 0.01797  | 0.039154 | 3386.956 | 3503.983 | 3219.149 | 3841.491 | 3749.861 | 4226.944 |
| 25910 | LOC119628 | 1.297121 | 0.226433 | 2.194261 | 0.103193 | 0.91781  | 0.94172  | 2.168345 | 0.547412 | 0.695731 | 2.232127 | 2.139111 | 0        |
| 12704 | CRYZ      | 5995.047 | 0.226298 | 0.100226 | 2.257875 | 0.023953 | 0.050126 | 5876.216 | 4929.443 | 5774.57  | 6430.758 | 6293.264 | 6666.029 |
| 15924 | TRIM32    | 1008.593 | 0.226293 | 0.134673 | 1.680317 | 0.092896 | 0.155089 | 986.0551 | 842.4668 | 965.6751 | 1078.117 | 956.1825 | 1223.06  |
| 12208 | ATP6V1F   | 3251.819 | 0.226049 | 0.095567 | 2.365352 | 0.018013 | 0.039223 | 2809.634 | 3210.023 | 2973.556 | 3569.171 | 3414.021 | 3534.513 |
| 18238 | LEO1      | 1932.536 | 0.225841 | 0.174476 | 1.2944   | 0.195527 | 0.285047 | 1441.95  | 2405.328 | 1497.214 | 2049.093 | 2094.189 | 2107.442 |
| 24309 | TRNAC-GC  | 15.79959 | 0.225809 | 0.626976 | 0.360156 | 0.71873  | 0.786024 | 11.9259  | 14.78012 | 17.39328 | 15.62489 | 14.97377 | 20.09959 |
| 14979 | UTP14C    | 2114.829 | 0.225676 | 0.122766 | 1.838267 | 0.066023 | 0.117179 | 1929.827 | 2230.156 | 1690.627 | 2205.341 | 2248.205 | 2384.816 |
| 14196 | ARHGEF40  | 3914.44  | 0.225522 | 0.114027 | 1.977802 | 0.047951 | 0.089798 | 3846.103 | 3343.591 | 3644.937 | 4109.346 | 3784.087 | 4758.578 |
| 19201 | MAML2     | 552.6767 | 0.225504 | 0.195642 | 1.15     |          |          |          |          |          |          |          |          |



|       |          |          |          |          |          |          |          |          |          |          |          |          |          |
|-------|----------|----------|----------|----------|----------|----------|----------|----------|----------|----------|----------|----------|----------|
| 16734 | CCDC186  | 2046.957 | 0.224823 | 0.146309 | 1.536631 | 0.124384 | 0.197605 | 1638.727 | 2358.798 | 1665.581 | 2122.753 | 2273.875 | 2222.01  |
| 20208 | LOC10323 | 135.7211 | 0.224564 | 0.225613 | 0.995346 | 0.319568 | 0.420413 | 120.8853 | 124.8099 | 129.406  | 158.481  | 139.0422 | 141.7021 |
| 25317 | LOC11962 | 4.960066 | 0.224281 | 1.138631 | 0.196975 | 0.843847 | 0.886076 | 6.505036 | 2.737059 | 4.87012  | 4.464254 | 2.139111 | 9.044815 |
| 14601 | NFRKB    | 970.0152 | 0.224072 | 0.117593 | 1.90549  | 0.056716 | 0.103267 | 912.8734 | 859.4365 | 916.9739 | 1008.921 | 988.2691 | 1133.617 |
| 26720 | LOC10321 | 0.629337 | 0.223976 | 3.319627 | 0.06747  | 0.946207 | NA       | 0.542086 | 1.094824 | 0        | 0        | 2.139111 | 0        |
| 11869 | IDE      | 7285.344 | 0.223827 | 0.092002 | 2.432858 | 0.01498  | 0.033553 | 6728.918 | 7157.409 | 6281.063 | 7636.106 | 7685.825 | 8222.742 |
| 23218 | LOC10324 | 48.20383 | 0.223671 | 0.424563 | 0.526825 | 0.598315 | 0.685081 | 36.86187 | 37.224   | 58.44144 | 44.64254 | 74.86887 | 37.18424 |
| 18568 | PTMS     | 6323.633 | 0.223618 | 0.180288 | 1.240339 | 0.21485  | 0.307622 | 4515.037 | 8159.721 | 4827.68  | 6937.451 | 6857.989 | 6643.919 |
| 25587 | LOC11962 | 2.610204 | 0.223572 | 1.457535 | 0.15339  | 0.87809  | 0.91234  | 2.168345 | 2.189647 | 2.782925 | 2.232127 | 4.278221 | 2.009959 |
| 27459 | LOC11962 | 0.644839 | 0.223162 | 3.294221 | 0.067744 | 0.94599  | NA       | 0.542086 | 1.094824 | 0        | 2.232127 | 0        | 0        |
| 17139 | ACY1     | 3088.25  | 0.223158 | 0.151355 | 1.474403 | 0.140373 | 0.217738 | 3319.195 | 2202.238 | 3032.693 | 3133.906 | 3088.876 | 3752.593 |
| 18262 | PUR1     | 283.1215 | 0.223026 | 0.17271  | 1.291332 | 0.196588 | 0.286185 | 259.1173 | 276.443  | 248.3761 | 332.5869 | 271.6671 | 310.5387 |
| 13818 | CUNH16or | 3897.956 | 0.222625 | 0.108865 | 2.044975 | 0.040857 | 0.078604 | 3409.181 | 4020.192 | 3368.036 | 4113.81  | 3970.189 | 4506.328 |
| 16199 | NMI      | 890.2662 | 0.222495 | 0.136737 | 1.627176 | 0.1037   | 0.170187 | 767.5943 | 955.781  | 742.3454 | 948.654  | 943.3478 | 983.8749 |
| 25222 | LOC11962 | 5.916321 | 0.222481 | 1.054288 | 0.211025 | 0.832868 | 0.877876 | 5.96295  | 8.211177 | 2.087194 | 8.928508 | 4.278221 | 6.029877 |
| 12986 | DCBLD2   | 23156.8  | 0.222415 | 0.100818 | 2.206095 | 0.027377 | 0.056039 | 20779.8  | 23677.2  | 19673.2  | 24298.93 | 23859.64 | 26652.06 |
| 23973 | LOC11962 | 21.40829 | 0.222288 | 0.540824 | 0.411018 | 0.681059 | 0.755265 | 22.22554 | 16.42235 | 20.87194 | 24.5534  | 19.252   | 25.12449 |
| 15925 | ZEB1     | 6033.407 | 0.22222  | 0.132255 | 1.680235 | 0.092912 | 0.155105 | 4949.791 | 6847.574 | 4910.472 | 6448.615 | 6614.13  | 6429.859 |
| 15262 | FMR1     | 5305.547 | 0.222193 | 0.124419 | 1.785853 | 0.074123 | 0.129116 | 4473.839 | 5872.634 | 4346.93  | 5591.478 | 5745.651 | 5802.751 |
| 15140 | OAS3     | 3111.369 | 0.222145 | 0.122909 | 1.807398 | 0.0707   | 0.124144 | 2664.355 | 3291.587 | 2666.043 | 3178.549 | 3140.214 | 3727.469 |
| 13207 | SNRNP70  | 7570.143 | 0.222061 | 0.102486 | 2.166736 | 0.030255 | 0.060902 | 6678.504 | 7709.748 | 6581.619 | 8187.442 | 7589.565 | 8673.978 |
| 22616 | LOC11962 | 62.06756 | 0.222061 | 0.356856 | 0.622269 | 0.533765 | 0.627438 | 60.71367 | 41.05589 | 70.26887 | 58.0353  | 77.00798 | 65.32367 |
| 18315 | ZNHIT1   | 2467.621 | 0.222039 | 0.173475 | 1.279944 | 0.200565 | 0.291128 | 2627.493 | 1568.335 | 2640.301 | 2705.338 | 2466.395 | 2797.863 |
| 12353 | ARG2     | 2052.496 | 0.221879 | 0.095101 | 2.333103 | 0.019643 | 0.042273 | 1954.763 | 1860.653 | 1870.126 | 2276.77  | 2115.58  | 2237.084 |
| 14229 | EIF4EBP2 | 4386.832 | 0.221865 | 0.112586 | 1.970627 | 0.048767 | 0.091103 | 3907.901 | 4536.949 | 3710.335 | 4370.505 | 4656.844 | 5138.46  |
| 23897 | LOC11962 | 30.44568 | 0.22186  | 0.524248 | 0.423197 | 0.672151 | 0.747757 | 31.9831  | 22.9913  | 28.52499 | 55.80317 | 19.252   | 24.11951 |
| 25150 | LOC11962 | 8.174699 | 0.221852 | 1.001001 | 0.22163  | 0.824602 | 0.871652 | 2.710432 | 16.42235 | 3.478657 | 6.696381 | 10.69555 | 9.044815 |
| 22984 | LOC10321 | 43.90434 | 0.221793 | 0.391338 | 0.566755 | 0.570881 | 0.660323 | 42.82482 | 41.6033  | 36.17803 | 46.87467 | 57.75599 | 38.18922 |
| 15335 | FGF5     | 602.2579 | 0.221426 | 0.124893 | 1.772924 | 0.076241 | 0.132173 | 567.5644 | 545.7696 | 555.1936 | 658.4775 | 635.3159 | 651.2267 |
| 12256 | TSG101   | 2186.716 | 0.221257 | 0.09395  | 2.355058 | 0.01852  | 0.040172 | 2024.693 | 2099.324 | 1934.133 | 2314.716 | 2378.691 | 2368.737 |
| 10459 | FYTTD1   | 7967.857 | 0.22123  | 0.080327 | 2.754107 | 0.005885 | 0.014959 | 7430.378 | 7506.111 | 7139.595 | 8428.511 | 8569.277 | 8733.272 |
| 13467 | SEC24A   | 2341.163 | 0.221127 | 0.104613 | 2.113768 | 0.034535 | 0.068175 | 2101.669 | 2375.767 | 2009.968 | 2502.214 | 2468.534 | 2588.827 |
| 13271 | FBN1     | 15036.12 | 0.221091 | 0.102648 | 2.153871 | 0.03125  | 0.062602 | 13600.95 | 14825.01 | 13240.46 | 15524.44 | 14967.36 | 18058.48 |
| 15590 | AP3M2    | 854.5727 | 0.220839 | 0.127555 | 1.731321 | 0.083395 | 0.142211 | 783.3148 | 849.5831 | 738.171  | 834.8155 | 932.6523 | 988.8998 |
| 25925 | LOC11962 | 1.299784 | 0.220682 | 2.19362  | 0.100602 | 0.919867 | 0.943285 | 0.542086 | 2.189647 | 0.695731 | 2.232127 | 2.139111 | 0        |
| 18299 | UBAP2L   | 6194.797 | 0.220618 | 0.171944 | 1.283085 | 0.199462 | 0.289781 | 4635.381 | 7833.463 | 4697.578 | 6455.311 | 6656.912 | 6890.139 |
| 19516 | HDAC10   | 670.6862 | 0.220581 | 0.20077  | 1.098677 | 0.271909 | 0.370384 | 711.2173 | 430.2657 | 720.082  | 616.067  | 729.4367 | 817.0483 |
| 25267 | LOC11962 | 5.551311 | 0.220549 | 1.08153  | 0.203923 | 0.838414 | 0.882113 | 3.794605 | 8.211177 | 3.478657 | 2.232127 | 8.556443 | 7.034856 |
| 13834 | TWSG1    | 3886.704 | 0.220427 | 0.10788  | 2.043261 | 0.041027 | 0.078841 | 3435.201 | 4003.77  | 3336.032 | 3984.347 | 4085.701 | 4475.174 |
| 17116 | LOC10322 | 1349.516 | 0.220392 | 0.149028 | 1.478862 | 0.139177 | 0.216174 | 1452.791 | 1006.143 | 1284.32  | 1421.865 | 1339.083 | 1592.892 |
| 12761 | CIC      | 3849.074 | 0.220113 | 0.097917 | 2.247961 | 0.024579 | 0.051205 | 3446.585 | 3499.604 | 3726.337 | 4270.059 | 3786.226 | 4365.631 |
| 21611 | LOC10323 | 184.1417 | 0.219954 | 0.278637 | 0.789394 | 0.429882 | 0.528824 | 129.5586 | 169.1503 | 208.7194 | 243.3018 | 222.4675 | 131.6523 |
| 19605 | FAM241B  | 447.1959 | 0.219915 | 0.202479 | 1.086116 | 0.277428 | 0.376201 | 492.2144 | 299.9817 | 450.1382 | 437.4969 | 455.6306 | 547.7138 |
| 20449 | LOC10321 | 157.5645 | 0.219852 | 0.230383 | 0.954288 | 0.339938 | 0.441941 | 169.1309 | 124.2625 | 141.9292 | 183.0344 | 173.268  | 153.7619 |
| 17377 | LOC10323 | 534.7407 | 0.219576 | 0.153215 | 1.433122 | 0.151823 | 0.232274 | 497.0932 | 475.1535 | 505.101  | 660.7096 | 583.9772 | 486.4101 |
| 22771 | LOC11962 | 47.05118 | 0.219472 | 0.367602 | 0.597037 | 0.550483 | 0.642685 | 46.61943 | 40.50847 | 43.83108 | 46.87467 | 49.19955 | 55.27387 |
| 18867 | TMEM106  | 279.6288 | 0.219471 | 0.181413 | 1.209785 | 0.226362 | 0.31896  | 271.0432 | 256.7361 | 249.0718 | 247.7661 | 331.5622 | 321.5934 |
| 20582 | HOXB8    | 156.6637 | 0.21945  | 0.233309 | 0.940594 | 0.346913 | 0.448094 | 137.1479 | 171.3399 | 124.5359 | 162.9453 | 188.2417 | 155.7718 |
| 13967 | PHC3     | 3809.164 | 0.219175 | 0.108584 | 2.018494 | 0.04354  | 0.082874 | 3458.511 | 3945.197 | 3156.533 | 3955.329 | 4246.135 | 4093.281 |
| 12678 | IFT22    | 1639.123 | 0.219165 | 0.096755 | 2.265153 | 0.023503 | 0.049285 | 1544.946 | 1497.171 | 1504.171 | 1770.077 | 1713.428 | 1804.943 |
| 19349 | YIF1B    | 1135.21  | 0.218957 | 0.194242 | 1.12724  | 0.259641 | 0.35674  | 1227.826 | 745.5749 | 1178.569 | 1194.188 | 996.8256 | 1468.275 |
| 18447 | FKBP1B   | 347.8968 | 0.218914 | 0.174096 | 1.257431 | 0.208598 | 0.300622 | 342.5986 | 281.3697 | 340.9084 | 328.1227 | 423.5439 | 370.8374 |
| 14699 | CCNDBP1  | 1064.591 | 0.218857 | 0.115761 | 1.890598 | 0.058678 | 0.106123 | 1010.449 | 903.2295 | 1039.423 | 1176.331 | 1097.364 | 1160.751 |
| 15088 | LOC10322 | 774.4673 | 0.218819 | 0.12033  | 1.818496 | 0.068988 | 0.121557 | 749.7054 | 706.1612 | 692.9484 | 852.6725 | 785.0536 | 860.2624 |
| 13259 | ACTB     | 189474.6 | 0.218747 | 0.101452 | 2.15616  | 0.031071 | 0.062299 | 182422.9 | 166523.2 | 176475.7 | 196337.9 | 186113.3 | 228974.5 |
| 25230 | LOC10322 | 5.877128 | 0.218584 | 1.03961  | 0.210256 | 0.833468 | 0.87823  | 3.252518 | 6.568942 | 6.261582 | 4.464254 | 10.69555 | 4.019918 |
| 11465 | CSNK1A1  | 22919.79 | 0.218497 | 0.086585 | 2.523494 | 0.011619 | 0.026941 | 22173.5  | 20883.76 | 20510.86 | 24290.01 | 23478.88 | 26181.73 |
| 17374 | FAM207A  | 954.7973 | 0.218449 | 0.152198 | 1.435295 | 0.151203 | 0.231365 | 986.5972 | 700.6871 | 962.1965 | 1053.564 | 960.4607 | 1065.278 |
| 14812 | PPME1    | 2564.289 | 0.218283 | 0.116693 | 1.870567 | 0.061405 | 0.110212 | 2254.537 | 2626.482 | 2235.385 | 2783.462 | 2474.951 | 3010.918 |
| 23055 | LOC11962 | 55.30804 | 0.218132 | 0.394642 | 0.552734 | 0.580446 | 0.669319 | 48.24569 | 53.64636 | 49.39693 | 73.66019 | 72.72976 | 34.1693  |
| 24427 | PKD2L1   | 16.13173 | 0.217879 | 0.639413 | 0.340748 | 0.733293 | 0.798076 | 17.88885 | 10.40082 | 16.00182 | 22.32127 | 17.11289 | 13.06473 |
| 12137 | SLC25A4  | 2565.585 | 0.217832 | 0.091576 | 2.3787   | 0.017374 | 0.038052 | 2403.611 | 2367.556 | 2346.702 | 2848.194 | 2622.55  | 2804.898 |
| 23144 | LOC10322 | 46.42582 | 0.217778 | 0.405121 | 0.537563 | 0.590878 | 0.6787   | 36.31979 | 44.34036 | 46.614   | 62.49956 | 55.61688 | 33.16432 |
| 19107 | STK19    | 420.4205 | 0.217749 | 0.186457 | 1.167828 | 0.242876 | 0.337932 | 458.6051 | 309.8351 | 400.7413 | 410.7114 | 432.1004 | 510.5296 |
| 24493 | NDNF     | 14.75273 | 0.217719 | 0.655756 | 0.332013 | 0.73988  | 0.803074 | 11.9259  | 17.51718 | 11.1317  | 15.62489 | 19.252   | 13.06473 |
| 15328 | NCOA2    | 2995.725 | 0.217647 | 0.122666 | 1.774305 | 0.076013 | 0.131837 | 2562.984 | 3243.962 | 2505.329 | 3234.352 | 3043.954 | 3383.766 |
| 24440 | LOC11962 | 15.8672  | 0.217627 | 0.642082 | 0.338939 | 0.734655 | 0.799133 | 10.29964 | 15.32753 | 18.78475 | 17.85702 | 12.83466 | 20.09959 |
| 17401 | PHLDB3   | 421.411  | 0.21759  | 0.152236 | 1.429295 | 0.152919 | 0.233628 | 389.218  | 383.7357 | 399.3498 | 459.8182 | 397.8746 | 498.4698 |
| 20615 | KCNN3    | 167.0517 | 0.217569 | 0.232799 | 0.934578 | 0.350006 | 0.451366 | 145.8212 | 175.7192 | 143.3207 | 138.3919 | 201.0764 | 197.981  |
| 21342 | TRIM58   | 102.1333 | 0.217397 | 0.263398 | 0.825355 | 0.40917  | 0.509689 | 105.1648 | 87.58589 | 91.14081 | 11       |          |          |



|       |           |          |          |          |          |          |          |          |          |          |          |          |          |
|-------|-----------|----------|----------|----------|----------|----------|----------|----------|----------|----------|----------|----------|----------|
| 21565 | LOC103211 | 91.41104 | 0.216415 | 0.272374 | 0.794549 | 0.426876 | 0.526246 | 85.10756 | 83.2066  | 84.1835  | 100.4457 | 109.0946 | 86.42823 |
| 22646 | TGFB83L   | 52.10003 | 0.216374 | 0.351227 | 0.616051 | 0.537861 | 0.631415 | 46.07734 | 49.81448 | 49.39693 | 55.80317 | 49.19955 | 62.30873 |
| 14188 | SNX29     | 2104.411 | 0.216194 | 0.109246 | 1.978959 | 0.047821 | 0.089598 | 1896.218 | 2060.458 | 1889.606 | 2267.841 | 2047.129 | 2465.215 |
| 17971 | ZNF576    | 304.8203 | 0.21616  | 0.160322 | 1.348287 | 0.177566 | 0.262678 | 273.2115 | 287.9386 | 285.9456 | 314.7299 | 329.423  | 337.6731 |
| 20633 | NUDT6     | 163.4759 | 0.216153 | 0.232333 | 0.930358 | 0.352186 | 0.453781 | 134.9795 | 175.7192 | 145.4079 | 154.0168 | 164.7115 | 206.0208 |
| 13659 | ZNF277    | 1191.229 | 0.215957 | 0.104017 | 2.076172 | 0.037878 | 0.073723 | 1099.351 | 1095.918 | 1108.996 | 1290.169 | 1319.831 | 1233.11  |
| 16238 | CDC93     | 1894.962 | 0.215934 | 0.133387 | 1.618852 | 0.105479 | 0.172691 | 1594.276 | 2090.566 | 1577.223 | 2031.236 | 1918.782 | 2157.691 |
| 13864 | OSGIN2    | 3110.482 | 0.215608 | 0.105842 | 2.037072 | 0.041643 | 0.079852 | 2723.984 | 3190.316 | 2724.484 | 3216.495 | 3277.118 | 3530.493 |
| 24288 | LOC119621 | 18.75868 | 0.215484 | 0.591877 | 0.364068 | 0.715807 | 0.783503 | 17.34676 | 15.87494 | 18.08902 | 26.78552 | 21.39111 | 13.06473 |
| 18070 | MIGA2     | 434.6183 | 0.215468 | 0.1621   | 1.329227 | 0.183773 | 0.270371 | 449.9317 | 349.2487 | 409.7858 | 464.2824 | 429.9612 | 504.4997 |
| 14550 | HSPG2     | 13856.68 | 0.21537  | 0.112381 | 1.916419 | 0.055312 | 0.101063 | 12897.86 | 11708.04 | 13875.67 | 14249.9  | 13532.01 | 16876.62 |
| 16154 | MPPE1     | 946.1413 | 0.215286 | 0.131584 | 1.636106 | 0.101817 | 0.167563 | 980.6342 | 802.5057 | 847.4008 | 991.0644 | 949.7651 | 1105.477 |
| 24789 | LOC119621 | 10.21928 | 0.215237 | 0.759877 | 0.283252 | 0.776983 | 0.833277 | 9.757555 | 8.211177 | 10.43597 | 11.16063 | 10.69555 | 11.05477 |
| 21288 | EVA1B     | 336.0745 | 0.215192 | 0.257455 | 0.835843 | 0.403243 | 0.50358  | 367.5346 | 178.4563 | 388.2181 | 352.6761 | 348.675  | 380.8872 |
| 16447 | DIPK2A    | 1118.579 | 0.214941 | 0.136022 | 1.580195 | 0.114062 | 0.184371 | 937.2673 | 1221.823 | 946.8904 | 1227.67  | 1165.815 | 1212.005 |
| 19268 | CKB       | 257.6852 | 0.214871 | 0.188249 | 1.141423 | 0.253694 | 0.350049 | 263.9961 | 206.9217 | 246.2889 | 279.0159 | 252.4151 | 297.4739 |
| 13015 | MRPL44    | 1560.059 | 0.214864 | 0.09762  | 2.201032 | 0.027734 | 0.056653 | 1485.317 | 1426.555 | 1421.379 | 1678.559 | 1647.115 | 1701.43  |
| 12145 | TMEM41B   | 2212.092 | 0.21468  | 0.090297 | 2.377492 | 0.017431 | 0.038155 | 2023.066 | 2081.807 | 2039.189 | 2352.662 | 2382.969 | 2392.856 |
| 15277 | DTX3L     | 2779.643 | 0.214639 | 0.120318 | 1.783937 | 0.074434 | 0.12953  | 2405.779 | 2969.162 | 2348.093 | 2857.123 | 2887.799 | 3209.904 |
| 18176 | ZNF791    | 567.342  | 0.214457 | 0.164138 | 1.306564 | 0.191361 | 0.279893 | 477.036  | 638.2822 | 459.1827 | 593.7458 | 643.8723 | 591.9329 |
| 16603 | KDM6B     | 744.9608 | 0.214427 | 0.137753 | 1.556604 | 0.119565 | 0.191442 | 619.0626 | 762.5447 | 689.4698 | 830.3512 | 725.1585 | 843.1778 |
| 25284 | LOC119621 | 5.620018 | 0.214216 | 1.06283  | 0.201552 | 0.840267 | 0.883503 | 3.252518 | 3.284471 | 9.044508 | 6.696381 | 6.417332 | 5.024897 |
| 13883 | SNX9      | 6810.763 | 0.214205 | 0.105359 | 2.03309  | 0.042043 | 0.080506 | 5978.128 | 7100.479 | 5842.056 | 7301.287 | 6975.64  | 7666.988 |
| 24205 | LOC119621 | 21.33899 | 0.214172 | 0.573468 | 0.373468 | 0.7088   | 0.778494 | 21.68345 | 19.15941 | 17.39328 | 26.78552 | 29.94755 | 13.06473 |
| 22718 | LOC119621 | 74.77522 | 0.213975 | 0.353139 | 0.605922 | 0.544566 | 0.637261 | 80.77087 | 60.2153  | 66.09448 | 53.57105 | 117.6511 | 70.34856 |
| 16188 | TNFRSF11A | 766.2663 | 0.213874 | 0.131332 | 1.628491 | 0.103421 | 0.169844 | 725.3116 | 749.9542 | 657.4661 | 772.3159 | 785.0536 | 907.4965 |
| 17396 | ZNF627    | 950.0565 | 0.213772 | 0.149485 | 1.430057 | 0.152701 | 0.233361 | 978.4659 | 749.4068 | 914.191  | 863.8331 | 1108.059 | 1086.383 |
| 20009 | OGFOD2    | 462.3419 | 0.213667 | 0.207862 | 1.027929 | 0.303983 | 0.403888 | 512.8137 | 302.7187 | 471.0101 | 421.872  | 521.943  | 543.6939 |
| 14433 | CASP7     | 1264.366 | 0.213417 | 0.110133 | 1.937819 | 0.052645 | 0.096971 | 1210.479 | 1169.819 | 1131.259 | 1466.507 | 1268.493 | 1339.638 |
| 23852 | LOC103231 | 26.90183 | 0.213207 | 0.49561  | 0.430191 | 0.667056 | 0.743489 | 26.02015 | 25.72836 | 22.2634  | 26.78552 | 38.50399 | 22.10955 |
| 20490 | ACSM3     | 168.8921 | 0.213047 | 0.224627 | 0.948446 | 0.342902 | 0.444903 | 171.8414 | 170.2451 | 128.0146 | 171.8738 | 175.4071 | 195.971  |
| 21441 | LOC119621 | 133.7087 | 0.21296  | 0.262094 | 0.812535 | 0.416485 | 0.516406 | 149.6158 | 93.06001 | 129.406  | 131.6955 | 149.7377 | 148.737  |
| 13427 | SEC16A    | 4739.263 | 0.21296  | 0.100375 | 2.121645 | 0.033868 | 0.067057 | 4455.95  | 4390.79  | 4331.624 | 4915.144 | 4691.07  | 5651     |
| 25672 | LOC119611 | 2.648652 | 0.212884 | 1.527143 | 0.1394   | 0.889134 | 0.202776 | 3.252518 | 0.547412 | 3.478657 | 4.464254 | 2.139111 | 2.009959 |
| 14990 | PHYH      | 1132.134 | 0.212771 | 0.115907 | 1.835711 | 0.0664   | 0.117762 | 1074.415 | 1092.087 | 983.7642 | 1136.153 | 1197.902 | 1308.483 |
| 21904 | LOC119611 | 103.7235 | 0.212556 | 0.285818 | 0.743676 | 0.457072 | 0.554751 | 89.98634 | 111.1246 | 84.87923 | 118.3027 | 132.6249 | 85.42325 |
| 16930 | SSH3      | 1281.763 | 0.212492 | 0.141474 | 1.501993 | 0.133099 | 0.208992 | 1272.277 | 1031.871 | 1264.144 | 1357.133 | 1189.346 | 1575.808 |
| 17812 | IL17RE    | 1159.964 | 0.212459 | 0.154528 | 1.374886 | 0.169167 | 0.252487 | 1259.267 | 852.3202 | 1115.257 | 1238.83  | 1144.424 | 1349.687 |
| 21433 | LOC103221 | 113.0211 | 0.212315 | 0.260964 | 0.813578 | 0.415887 | 0.515834 | 107.8752 | 120.4306 | 86.27069 | 120.5349 | 113.3729 | 129.6424 |
| 23402 | LOC103211 | 35.19774 | 0.212276 | 0.425836 | 0.498493 | 0.618137 | 0.702195 | 33.06727 | 33.39212 | 30.61218 | 40.17829 | 42.78221 | 31.15436 |
| 24900 | LOC103221 | 9.869536 | 0.212156 | 0.799239 | 0.265447 | 0.790665 | 0.84417  | 12.46799 | 7.663765 | 6.957314 | 13.39276 | 10.69555 | 8.039836 |
| 13283 | COP1      | 1713.041 | 0.212069 | 0.098574 | 2.151361 | 0.031448 | 0.06294  | 1598.071 | 1626.908 | 1533.392 | 1892.844 | 1865.305 | 1761.729 |
| 18971 | LOC103231 | 284.8163 | 0.211849 | 0.177967 | 1.190382 | 0.233896 | 0.327771 | 286.2216 | 257.831  | 250.4633 | 296.8729 | 273.8062 | 343.703  |
| 17122 | CEP85L    | 880.5593 | 0.211843 | 0.143337 | 1.477937 | 0.139425 | 0.216482 | 753.5001 | 951.9491 | 744.4326 | 852.6725 | 981.8518 | 998.9496 |
| 14140 | INOB80B   | 1247.545 | 0.211791 | 0.106559 | 1.987544 | 0.046862 | 0.088108 | 1123.745 | 1202.664 | 1139.608 | 1319.187 | 1409.674 | 1290.394 |
| 18280 | LOC119621 | 398.246  | 0.211655 | 0.164384 | 1.287563 | 0.197898 | 0.287808 | 382.713  | 322.4256 | 404.2199 | 441.9611 | 382.9008 | 455.2557 |
| 25408 | LOC119621 | 4.27845  | 0.21156  | 1.179298 | 0.179395 | 0.857628 | 0.897309 | 3.794605 | 6.02153  | 2.087194 | 4.464254 | 4.278221 | 5.024897 |
| 20484 | LOC103231 | 168.4272 | 0.211528 | 0.222729 | 0.949714 | 0.342258 | 0.444196 | 141.4845 | 183.383  | 144.7121 | 171.8738 | 171.1289 | 197.981  |
| 16710 | DPM3      | 588.3549 | 0.211438 | 0.137226 | 1.540806 | 0.123364 | 0.196268 | 539.3759 | 501.9766 | 592.7631 | 651.7811 | 650.2896 | 593.9429 |
| 24179 | LOC103211 | 42.53671 | 0.2114   | 0.560349 | 0.872764 | 0.705977 | 0.776227 | 60.71367 | 15.32753 | 43.13534 | 51.33592 | 21.39111 | 63.31371 |
| 21244 | LOC119621 | 112.5168 | 0.211252 | 0.250666 | 0.842762 | 0.399361 | 0.499766 | 99.20181 | 113.3142 | 99.48959 | 136.1597 | 113.3729 | 113.5627 |
| 17157 | SLC39A3   | 918.6712 | 0.210789 | 0.143068 | 1.47335  | 0.140657 | 0.217949 | 925.8835 | 759.8076 | 875.2301 | 915.1721 | 896.2874 | 1139.647 |
| 23232 | LOC119621 | 41.59545 | 0.210469 | 0.401613 | 0.524059 | 0.600237 | 0.686836 | 32.52518 | 45.98259 | 36.87376 | 51.33892 | 40.6431  | 42.20914 |
| 14858 | SMPD2     | 1108.418 | 0.210269 | 0.112991 | 1.860938 | 0.062753 | 0.112282 | 996.3547 | 1094.276 | 994.2001 | 1220.973 | 1116.616 | 1228.085 |
| 14619 | OPA1      | 8105.497 | 0.210165 | 0.110387 | 1.903891 | 0.056924 | 0.103518 | 7112.173 | 8630.495 | 6807.731 | 8613.778 | 8376.757 | 9092.049 |
| 20720 | LOC103241 | 139.0164 | 0.210102 | 0.229474 | 0.915583 | 0.359885 | 0.461755 | 121.4273 | 139.59   | 125.9274 | 131.6955 | 164.7115 | 150.7469 |
| 19893 | ALOXE3    | 261.4244 | 0.210052 | 0.200875 | 1.045689 | 0.295705 | 0.395012 | 223.3396 | 291.2231 | 214.2853 | 245.534  | 286.6408 | 307.5237 |
| 14314 | SUCLA2    | 1144.756 | 0.209993 | 0.10721  | 1.958701 | 0.050148 | 0.093132 | 1098.809 | 1068     | 1019.942 | 1200.884 | 1208.598 | 1272.304 |
| 21744 | ADAT3     | 121.8221 | 0.20995  | 0.272454 | 0.770587 | 0.440952 | 0.539123 | 120.8853 | 87.03848 | 132.8847 | 124.9991 | 113.3729 | 151.7519 |
| 12098 | MRPL3     | 5113.11  | 0.209602 | 0.08781  | 2.386985 | 0.016987 | 0.037326 | 4901.545 | 4525.453 | 4802.634 | 5562.46  | 5253.656 | 5632.91  |
| 21442 | KLF15     | 103.6373 | 0.209347 | 0.25767  | 0.812462 | 0.416526 | 0.516433 | 101.3702 | 94.15483 | 91.83654 | 124.9991 | 106.9555 | 102.5079 |
| 16346 | TGFB1     | 5518.584 | 0.209217 | 0.131067 | 1.596257 | 0.110431 | 0.179605 | 4561.657 | 6205.46  | 4591.827 | 6013.35  | 5510.349 | 6228.863 |
| 20346 | LOC103231 | 191.6835 | 0.209201 | 0.21568  | 0.969959 | 0.332067 | 0.433893 | 161.5417 | 206.9217 | 164.8883 | 178.5702 | 233.1631 | 205.0158 |
| 23185 | LOC103221 | 53.55803 | 0.209177 | 0.393203 | 0.531981 | 0.594739 | 0.681956 | 43.36691 | 65.68942 | 38.96096 | 75.89232 | 49.19955 | 48.23901 |
| 21618 | HSD17B1   | 123.1043 | 0.20916  | 0.265439 | 0.78798  | 0.430708 | 0.529669 | 126.8482 | 102.9134 | 114.7957 | 95.98146 | 143.3204 | 154.7668 |
| 14340 | FAM174C   | 1084.725 | 0.208998 | 0.106933 | 1.954474 | 0.050645 | 0.093894 | 1017.496 | 971.1086 | 1031.77  | 1136.153 | 1167.954 | 1183.866 |
| 16262 | FAM171B   | 1862.535 | 0.208934 | 0.129368 | 1.615041 | 0.106302 | 0.173781 | 1563.919 | 2052.794 | 1566.787 | 1977.665 | 2000.068 | 2013.979 |
| 23597 | SMIM34A   | 34.03886 | 0.208853 | 0.445651 | 0.468648 | 0.639321 | 0.720276 | 35.7777  | 30.10765 | 29.91645 | 31.24978 | 29.94755 | 47.23404 |
| 25848 | LOC119611 | 1.676778 | 0.208804 | 1.866994 | 0.11184  | 0.910951 | 0.936924 | 1.084173 | 1.642235 | 2.087194 | 2.232127 | 0        | 3.014938 |
| 22250 | LOC119621 | 83.88118 | 0.20     |          |          |          |          |          |          |          |          |          |          |



|       |           |          |          |          |          |          |          |          |          |          |          |          |          |
|-------|-----------|----------|----------|----------|----------|----------|----------|----------|----------|----------|----------|----------|----------|
| 19021 | LOC103235 | 680.6996 | 0.208404 | 0.176474 | 1.180934 | 0.237629 | 0.332126 | 728.022  | 488.2913 | 681.8167 | 727.6734 | 635.3159 | 823.0782 |
| 15322 | KCNAB2    | 944.6579 | 0.208295 | 0.117325 | 1.775361 | 0.075838 | 0.131582 | 897.695  | 824.9496 | 910.7124 | 995.5286 | 964.7389 | 1074.323 |
| 17688 | CGRRF1    | 571.7389 | 0.20785  | 0.149855 | 1.387001 | 0.165442 | 0.248658 | 570.8169 | 469.1319 | 548.2363 | 642.8526 | 656.707  | 542.6889 |
| 13438 | PLXND1    | 4499.755 | 0.207595 | 0.09793  | 2.119835 | 0.03402  | 0.067303 | 4194.664 | 4216.713 | 4126.383 | 4571.396 | 4567.001 | 5322.371 |
| 24034 | CDKL4     | 24.74893 | 0.207359 | 0.516597 | 0.401395 | 0.68813  | 0.761169 | 29.27266 | 19.70683 | 19.48048 | 31.24978 | 25.66933 | 23.11453 |
| 22571 | LOC119624 | 81.69456 | 0.207298 | 0.32922  | 0.629663 | 0.528915 | 0.62297  | 78.60252 | 59.12048 | 91.14081 | 60.26743 | 100.5382 | 100.4979 |
| 21262 | LOC103215 | 208.2138 | 0.207248 | 0.246554 | 0.840579 | 0.400584 | 0.500871 | 239.0601 | 135.7581 | 206.6322 | 216.5163 | 201.0764 | 250.2399 |
| 24452 | LOC103215 | 23.58375 | 0.20708  | 0.613556 | 0.337507 | 0.735734 | 0.799914 | 20.59928 | 14.78012 | 29.22072 | 40.17829 | 25.66933 | 11.05477 |
| 21388 | LOC119625 | 129.6402 | 0.206941 | 0.252989 | 0.817986 | 0.413365 | 0.513804 | 112.754  | 146.7064 | 102.2725 | 129.4634 | 136.9031 | 149.7419 |
| 24357 | LOC119615 | 19.50935 | 0.20689  | 0.58593  | 0.353096 | 0.724017 | 0.790244 | 14.09425 | 24.63353 | 16.00182 | 20.08914 | 17.11289 | 25.12449 |
| 18663 | LOC119615 | 413.5309 | 0.206809 | 0.167713 | 1.233114 | 0.217533 | 0.310012 | 417.9486 | 327.3523 | 407.6986 | 475.443  | 391.4573 | 461.2856 |
| 20690 | TST       | 895.4987 | 0.20671  | 0.22387  | 0.923349 | 0.355826 | 0.457172 | 1066.826 | 491.5758 | 937.1502 | 966.511  | 889.87   | 1021.059 |
| 25433 | DPT       | 4.606043 | 0.206567 | 1.176691 | 0.175549 | 0.860648 | 0.899632 | 2.168345 | 5.474118 | 4.87012  | 6.696381 | 6.417332 | 2.009959 |
| 16610 | TMEM205   | 1968.58  | 0.206534 | 0.132723 | 1.556133 | 0.119676 | 0.191547 | 1997.046 | 1509.762 | 1980.051 | 2133.913 | 1946.591 | 2244.119 |
| 23060 | PCSK4     | 61.59851 | 0.206515 | 0.373906 | 0.552316 | 0.580732 | 0.669504 | 54.20864 | 52.55153 | 63.31155 | 58.0353  | 96.25998 | 45.22408 |
| 24030 | IGFBP4    | 28.52762 | 0.206505 | 0.513485 | 0.402164 | 0.687563 | 0.760669 | 23.8518  | 20.80165 | 34.09084 | 44.64254 | 25.66933 | 22.10955 |
| 14114 | JAK1      | 13258.82 | 0.206458 | 0.103705 | 1.99083  | 0.0465   | 0.08757  | 11828.32 | 13682.01 | 11429.47 | 13941.87 | 13369.44 | 15301.82 |
| 15336 | NUDT16    | 1511.409 | 0.206354 | 0.116405 | 1.772731 | 0.076273 | 0.132211 | 1359.553 | 1569.43  | 1282.929 | 1582.578 | 1593.637 | 1680.326 |
| 20167 | LOC103215 | 1947.352 | 0.206194 | 0.205966 | 1.001109 | 0.316774 | 0.417572 | 1382.32  | 2633.598 | 1410.247 | 2071.414 | 1927.339 | 2259.194 |
| 22292 | CTU1      | 79.24329 | 0.206188 | 0.305291 | 0.675383 | 0.499433 | 0.595613 | 81.31296 | 58.57306 | 81.40057 | 75.89232 | 89.84265 | 88.43819 |
| 16404 | OSBPL7    | 903.6979 | 0.206093 | 0.129785 | 1.587953 | 0.112297 | 0.181993 | 877.0957 | 755.4283 | 889.1447 | 968.7431 | 885.5918 | 1046.184 |
| 15308 | AKAP8     | 1645.806 | 0.205984 | 0.115828 | 1.778364 | 0.075344 | 0.130848 | 1530.31  | 1663.037 | 1395.637 | 1747.755 | 1640.698 | 1897.401 |
| 17101 | RIMS2     | 848.8972 | 0.205808 | 0.138927 | 1.481411 | 0.138497 | 0.215306 | 756.7526 | 905.4191 | 701.2972 | 874.9938 | 977.5736 | 877.3471 |
| 15792 | AFDN      | 7365.982 | 0.205712 | 0.120773 | 1.703291 | 0.088514 | 0.149012 | 6280.071 | 8078.156 | 6169.05  | 7888.337 | 7441.966 | 8338.315 |
| 14778 | POGLUT1   | 1356.005 | 0.2057   | 0.109574 | 1.877271 | 0.060481 | 0.108803 | 1298.297 | 1244.267 | 1235.619 | 1566.953 | 1332.666 | 1458.225 |
| 23612 | LOC119625 | 646.1185 | 0.20561  | 0.440272 | 0.467007 | 0.640495 | 0.72114  | 758.3788 | 333.9212 | 709.646  | 624.9956 | 509.1083 | 940.6608 |
| 15514 | TTC28     | 2055.448 | 0.205593 | 0.118106 | 1.740749 | 0.081728 | 0.14005  | 1757.444 | 2167.203 | 1806.119 | 2167.395 | 2089.911 | 2344.617 |
| 18349 | ZNFB789   | 588.744  | 0.205485 | 0.161312 | 1.273839 | 0.20272  | 0.293712 | 634.2411 | 457.6363 | 550.3235 | 564.7281 | 665.2634 | 660.2715 |
| 17935 | CPEB1     | 531.9754 | 0.205457 | 0.151696 | 1.354404 | 0.175607 | 0.260302 | 474.8677 | 520.0412 | 491.8821 | 479.9073 | 583.9772 | 641.1769 |
| 13873 | VPS41     | 5302.96  | 0.205245 | 0.100832 | 2.03552  | 0.041799 | 0.080099 | 4820.232 | 5407.334 | 4554.953 | 5540.139 | 5495.375 | 5999.727 |
| 12767 | CDKN1A    | 11037.68 | 0.205207 | 0.091316 | 2.247218 | 0.024626 | 0.051279 | 10673.14 | 9935.524 | 10159.77 | 11745.45 | 11014.28 | 12697.92 |
| 25539 | LOC103224 | 5.970792 | 0.205154 | 1.285993 | 0.159529 | 0.873252 | 0.909018 | 6.505036 | 8.211177 | 1.391463 | 11.16063 | 8.556443 | 0        |
| 16428 | SCAPER    | 1309.18  | 0.205139 | 0.129478 | 1.584352 | 0.113114 | 0.183049 | 1212.105 | 1371.267 | 1065.86  | 1473.204 | 1283.466 | 1449.18  |
| 26042 | LOC103235 | 0.977529 | 0.204944 | 2.564462 | 0.079917 | 0.936303 | 0.955778 | 1.626259 | 1.094824 | 0        | 0        | 2.139111 | 1.004979 |
| 17187 | INTS5     | 1165.061 | 0.204815 | 0.139399 | 1.469271 | 0.141759 | 0.219262 | 1215.358 | 946.475  | 1090.907 | 1169.635 | 1152.981 | 1415.011 |
| 16788 | CHMP2B    | 1629.668 | 0.204775 | 0.134051 | 1.52759  | 0.126614 | 0.200507 | 1399.125 | 1772.519 | 1366.416 | 1799.094 | 1861.026 | 1579.828 |
| 26038 | LOC119625 | 0.993032 | 0.204714 | 2.552864 | 0.08019  | 0.936086 | 0.955742 | 1.626259 | 1.094824 | 0        | 2.232127 | 0        | 1.004979 |
| 17454 | TNNT1     | 455.3699 | 0.204583 | 0.144273 | 1.41803  | 0.156182 | 0.237888 | 419.0328 | 455.4466 | 394.4797 | 468.7467 | 509.1083 | 485.4051 |
| 22713 | LOC119615 | 63.26602 | 0.204472 | 0.336863 | 0.606991 | 0.543857 | 0.636571 | 54.75072 | 60.76271 | 59.8329  | 60.26743 | 87.70354 | 56.27885 |
| 13436 | HARS1     | 2668.915 | 0.204175 | 0.096294 | 2.120341 | 0.033977 | 0.067229 | 2545.638 | 2452.405 | 2448.974 | 2738.82  | 2759.453 | 3068.202 |
| 14220 | CUL4B     | 2975.471 | 0.204069 | 0.103418 | 1.973237 | 0.048469 | 0.090614 | 2620.988 | 3062.769 | 2613.863 | 3120.514 | 3159.466 | 3275.228 |
| 14345 | PCNA      | 7336.244 | 0.204011 | 0.104442 | 1.953348 | 0.050778 | 0.094105 | 7292.688 | 5968.431 | 7195.95  | 7984.318 | 7555.339 | 8020.741 |
| 24504 | TRNAS-AG  | 16.91744 | 0.203791 | 0.617007 | 0.330291 | 0.74118  | 0.804063 | 15.7205  | 12.59047 | 19.48048 | 15.62489 | 14.97377 | 23.11453 |
| 21053 | CCDC40    | 196.129  | 0.203761 | 0.233527 | 0.872538 | 0.382915 | 0.483532 | 163.168  | 218.9647 | 167.6713 | 196.4272 | 173.268  | 257.2747 |
| 14735 | TMEM109   | 3470.491 | 0.20373  | 0.108193 | 1.883015 | 0.059698 | 0.107681 | 3468.269 | 3079.739 | 3136.357 | 3569.171 | 3443.968 | 4125.441 |
| 18885 | PRRC2C    | 14061.35 | 0.203546 | 0.168744 | 1.206239 | 0.227726 | 0.320559 | 10575.56 | 17848.36 | 10789.4  | 14986.5  | 14644.35 | 15523.92 |
| 14773 | WRN       | 2262.344 | 0.203533 | 0.108383 | 1.877912 | 0.060393 | 0.108682 | 2024.151 | 2324.858 | 1961.267 | 2475.429 | 2290.988 | 2497.374 |
| 25299 | LOC119625 | 5.994563 | 0.203505 | 1.021168 | 0.199287 | 0.842039 | 0.884847 | 5.420864 | 6.568942 | 4.87012  | 8.928508 | 2.139111 | 8.039836 |
| 17031 | LOC119615 | 779.3063 | 0.203211 | 0.136453 | 1.489241 | 0.136424 | 0.212954 | 672.7292 | 815.6436 | 688.0783 | 821.4227 | 776.4972 | 901.4666 |
| 14491 | RCBM23    | 2664.5   | 0.203204 | 0.105467 | 1.926704 | 0.054017 | 0.099098 | 2528.291 | 2394.379 | 2515.765 | 2810.248 | 2594.741 | 3143.576 |
| 15163 | SYPL1     | 1449.361 | 0.203155 | 0.112654 | 1.80335  | 0.071333 | 0.125067 | 1270.108 | 1493.339 | 1279.45  | 1546.864 | 1531.603 | 1574.803 |
| 26104 | CXCR3     | 0.980192 | 0.202856 | 2.895507 | 0.070059 | 0.944147 | 0.961544 | 0        | 2.737059 | 0        | 0        | 2.139111 | 1.004979 |
| 18037 | ARFRP1    | 1246.539 | 0.202583 | 0.15154  | 1.336831 | 0.181278 | 0.267188 | 1307.512 | 961.8026 | 1213.356 | 1285.705 | 1172.233 | 1538.624 |
| 22006 | CLDN16    | 99.38791 | 0.202567 | 0.279332 | 0.725182 | 0.46834  | 0.565792 | 86.19173 | 107.2927 | 82.0963  | 109.3742 | 121.9293 | 89.44317 |
| 18249 | EAF1      | 1586.426 | 0.202443 | 0.156556 | 1.293102 | 0.195976 | 0.285498 | 1637.101 | 1176.388 | 1617.575 | 1658.47  | 1465.291 | 1963.73  |
| 20257 | PAOX      | 600.199  | 0.202358 | 0.205114 | 0.986561 | 0.323858 | 0.425026 | 641.2882 | 420.9597 | 617.1137 | 600.4422 | 513.3866 | 808.0035 |
| 22858 | LOC103234 | 61.83495 | 0.202347 | 0.346079 | 0.584685 | 0.55876  | 0.649866 | 55.29281 | 69.5213  | 46.614   | 78.12444 | 64.17332 | 57.28383 |
| 17676 | TOP1MT    | 1188.529 | 0.202295 | 0.145564 | 1.389731 | 0.164611 | 0.247577 | 969.7925 | 1340.612 | 1006.723 | 1194.188 | 1296.301 | 1323.558 |
| 13931 | ATRN      | 2398.157 | 0.202238 | 0.099835 | 2.025718 | 0.042794 | 0.081665 | 2268.631 | 2287.087 | 2140.765 | 2473.197 | 2453.56  | 2765.703 |
| 17876 | ATG2A     | 1685.664 | 0.202123 | 0.148091 | 1.364858 | 0.172298 | 0.256239 | 1688.599 | 1264.521 | 1755.33  | 1738.827 | 1623.585 | 2043.123 |
| 16499 | ABCC10    | 1521.075 | 0.20212  | 0.12829  | 1.575496 | 0.115142 | 0.185529 | 1486.943 | 1301.745 | 1462.427 | 1558.025 | 1446.039 | 1871.272 |
| 15356 | CTNNBIP1  | 1603     | 0.202058 | 0.114267 | 1.768303 | 0.07701  | 0.13333  | 1593.734 | 1350.465 | 1532     | 1729.898 | 1597.916 | 1813.988 |
| 14152 | KIF3B     | 2313.54  | 0.20194  | 0.101728 | 1.985097 | 0.047134 | 0.088541 | 2136.904 | 2277.233 | 2046.146 | 2372.751 | 2400.082 | 2648.121 |
| 19039 | CCDC32    | 415.674  | 0.201932 | 0.171377 | 1.178291 | 0.23868  | 0.33327  | 437.4637 | 319.1411 | 404.9157 | 410.7114 | 453.4915 | 468.3204 |
| 16081 | SHFL      | 1174.965 | 0.201687 | 0.12217  | 1.650874 | 0.098764 | 0.163276 | 1025.627 | 1188.978 | 1068.643 | 1142.849 | 1259.936 | 1363.757 |
| 16153 | LOC103215 | 3936.198 | 0.201662 | 0.123231 | 1.636452 | 0.101745 | 0.167454 | 4079.2   | 3187.032 | 3723.554 | 4203.095 | 3771.252 | 4653.055 |
| 17742 | ZNFS66    | 416.2545 | 0.201564 | 0.146303 | 1.377714 | 0.168292 | 0.252172 | 391.9284 | 367.3133 | 402.1327 | 424.1041 | 474.8826 | 437.1661 |
| 19374 | CERKL     | 300.2832 | 0.201421 | 0.179265 | 1.123591 | 0.261187 | 0.3584   | 268.8748 | 320.2359 | 249.0718 | 294.6408 | 342.2577 | 326.6183 |
| 14231 | TIMP2     | 17344.71 | 0.201336 | 0.102168 | 1.970635 | 0.048766 | 0.091103 | 15660.33 | 17498.02 | 15257.39 | 18120.41 | 17130    | 20402.09 |
| 24228 | LOC103225 | 26.16322 | 0.201111 | 0.543087 | 0.370311 | 0.711151 | 0.780341 | 32.52518 | 13.13788 | 27.13352 | 31.24978 | 2        |          |



|       |           |          |          |          |          |          |          |          |          |          |          |          |          |
|-------|-----------|----------|----------|----------|----------|----------|----------|----------|----------|----------|----------|----------|----------|
| 14876 | KLHL8     | 1082.621 | 0.200382 | 0.107815 | 1.85857  | 0.063088 | 0.112745 | 1002.318 | 1038.988 | 979.5898 | 1205.349 | 1135.868 | 1133.617 |
| 16337 | BLVRB     | 4074.886 | 0.200349 | 0.125344 | 1.59839  | 0.109956 | 0.17893  | 4056.974 | 3092.877 | 4227.264 | 4450.861 | 4338.116 | 4283.222 |
| 23782 | LOC119621 | 34.33717 | 0.200332 | 0.456024 | 0.4393   | 0.660444 | 0.738285 | 42.28274 | 24.08612 | 29.22072 | 33.4819  | 42.78221 | 34.1693  |
| 16026 | LOC103231 | 708.9122 | 0.200237 | 0.120556 | 1.660937 | 0.096726 | 0.160456 | 629.3623 | 680.9803 | 668.5978 | 761.1553 | 763.6625 | 749.7147 |
| 23809 | FAM110C   | 30.74256 | 0.199835 | 0.459046 | 0.435328 | 0.663325 | 0.740634 | 26.56223 | 32.84471 | 25.74206 | 37.94616 | 34.22577 | 27.13445 |
| 15931 | LOC119621 | 1359.839 | 0.199815 | 0.119018 | 1.678864 | 0.093179 | 0.155493 | 1291.25  | 1361.413 | 1148.652 | 1390.615 | 1388.283 | 1578.823 |
| 14675 | ERLEC1    | 4562.987 | 0.199792 | 0.105525 | 1.893322 | 0.058315 | 0.105643 | 3919.284 | 4776.168 | 4044.286 | 5008.893 | 4919.955 | 4709.334 |
| 13542 | BLVRA     | 3688.959 | 0.199791 | 0.095126 | 2.100276 | 0.035705 | 0.070093 | 3594.033 | 3410.923 | 3301.245 | 3944.168 | 3700.661 | 4182.725 |
| 16181 | ZNF823    | 906.4758 | 0.199737 | 0.122548 | 1.629872 | 0.103129 | 0.169438 | 766.5101 | 884.6175 | 878.013  | 991.0644 | 1001.104 | 917.5463 |
| 18346 | FBXO46    | 337.9191 | 0.199648 | 0.156683 | 1.274212 | 0.202588 | 0.293568 | 310.0734 | 318.0463 | 315.862  | 386.158  | 331.5622 | 365.8125 |
| 23070 | LOC103241 | 54.0037  | 0.199607 | 0.36241  | 0.550777 | 0.581787 | 0.670414 | 41.19856 | 46.53    | 63.31155 | 55.80317 | 59.8951  | 57.28383 |
| 24300 | LOC103231 | 20.23356 | 0.199556 | 0.552116 | 0.361439 | 0.717771 | 0.785233 | 18.97302 | 20.25424 | 17.39328 | 24.5534  | 17.11289 | 23.11453 |
| 14618 | HECTD4    | 3503.55  | 0.198791 | 0.104394 | 1.904238 | 0.056879 | 0.103443 | 3293.175 | 3355.087 | 3146.097 | 3703.099 | 3388.351 | 4135.491 |
| 25042 | LOC103221 | 12.49814 | 0.198756 | 0.83185  | 0.238932 | 0.811158 | 0.861139 | 8.673382 | 10.94824 | 14.61036 | 8.928508 | 27.80844 | 4.019918 |
| 16445 | CPA4      | 824.9809 | 0.19872  | 0.125692 | 1.581007 | 0.113876 | 0.184093 | 809.877  | 748.8594 | 750.6941 | 821.4227 | 849.2269 | 969.8052 |
| 24186 | LOC103211 | 28.53101 | 0.198589 | 0.527707 | 0.376324 | 0.706676 | 0.776771 | 21.68345 | 29.56024 | 27.13352 | 44.64254 | 32.08666 | 16.07967 |
| 14431 | MFSD14A   | 2803.343 | 0.198551 | 0.102435 | 1.93832  | 0.052584 | 0.096865 | 2805.839 | 2417.918 | 2611.776 | 2823.641 | 3035.398 | 3125.486 |
| 13057 | TMED8     | 5839.274 | 0.198541 | 0.090443 | 2.195201 | 0.028149 | 0.057314 | 5438.21  | 5650.932 | 5230.508 | 6124.956 | 5953.145 | 6637.889 |
| 22434 | MDH1B     | 88.48409 | 0.198499 | 0.304681 | 0.651498 | 0.514725 | 0.609966 | 74.26583 | 104.5557 | 68.18167 | 107.1421 | 81.28621 | 95.47305 |
| 20669 | LOC103241 | 240.0994 | 0.198383 | 0.214152 | 0.926367 | 0.354255 | 0.455652 | 204.3666 | 188.3097 | 276.9011 | 270.0874 | 273.8062 | 227.1254 |
| 18281 | PTPA      | 5227.759 | 0.198177 | 0.153944 | 1.287328 | 0.19798  | 0.287911 | 5708.169 | 3703.788 | 5200.592 | 5319.159 | 5063.275 | 6371.57  |
| 14612 | IRF2BPL   | 1933.206 | 0.198115 | 0.104012 | 1.904725 | 0.056816 | 0.103356 | 1828.457 | 1742.412 | 1836.035 | 2089.271 | 1893.113 | 2209.95  |
| 15738 | CUNH1orf1 | 1083.188 | 0.198035 | 0.11569  | 1.711767 | 0.08694  | 0.146859 | 1042.974 | 962.35   | 1026.204 | 1136.153 | 1080.251 | 1251.199 |
| 13538 | SLC25A46  | 3148.046 | 0.197916 | 0.094217 | 2.100635 | 0.035673 | 0.070052 | 2881.731 | 3132.838 | 2783.621 | 3379.44  | 3285.674 | 3424.97  |
| 20258 | LOC119611 | 226.7812 | 0.197731 | 0.20045  | 0.986436 | 0.323919 | 0.425086 | 242.8547 | 183.383  | 205.9365 | 243.3018 | 263.1106 | 222.1005 |
| 19947 | PITX1     | 209.9903 | 0.197601 | 0.190324 | 1.038235 | 0.29916  | 0.398716 | 204.3666 | 198.7105 | 182.2816 | 241.0697 | 222.4675 | 211.0457 |
| 19385 | LOC119611 | 413.5915 | 0.197547 | 0.176416 | 1.11978  | 0.262808 | 0.36042  | 449.3896 | 316.404  | 388.9138 | 426.3363 | 483.439  | 417.0665 |
| 12330 | UBL5      | 6141.827 | 0.197543 | 0.084469 | 2.338642 | 0.019354 | 0.04173  | 5843.149 | 5461.528 | 5859.45  | 6725.399 | 6528.566 | 6432.874 |
| 21802 | B4GALNT1  | 129.3612 | 0.197494 | 0.260049 | 0.759451 | 0.447583 | 0.545775 | 106.2489 | 147.2538 | 107.1426 | 162.9453 | 121.9293 | 130.6473 |
| 17327 | RASSF1    | 940.4825 | 0.197265 | 0.136608 | 1.444025 | 0.148732 | 0.2282   | 974.1292 | 769.661  | 889.1447 | 964.2789 | 941.2087 | 1104.472 |
| 24365 | CFAP57    | 22.6105  | 0.197213 | 0.560449 | 0.351884 | 0.724925 | 0.790976 | 14.09425 | 26.82318 | 22.2634  | 31.24978 | 17.11289 | 24.11951 |
| 18934 | LMX1B     | 372.8098 | 0.197152 | 0.164555 | 1.198091 | 0.230881 | 0.324178 | 325.7939 | 368.9556 | 348.5614 | 437.4969 | 337.9795 | 418.0715 |
| 14538 | MYH9      | 68839.93 | 0.196948 | 0.102651 | 1.918629 | 0.055031 | 0.100633 | 62189.77 | 68174.67 | 62089.15 | 70990.57 | 67067.54 | 82527.91 |
| 20015 | ARMCS     | 251.5556 | 0.196891 | 0.191882 | 1.062101 | 0.304844 | 0.40491  | 233.6392 | 215.1328 | 256.0291 | 294.6408 | 272.4675 | 287.4241 |
| 15919 | TMEM135   | 1020.495 | 0.196884 | 0.117101 | 1.681316 | 0.092702 | 0.154813 | 1031.59  | 903.2295 | 919.7569 | 1040.171 | 1101.642 | 1126.582 |
| 23558 | LOC103231 | 39.62999 | 0.196788 | 0.413895 | 0.475454 | 0.634463 | 0.715986 | 33.60935 | 41.05589 | 36.17803 | 31.24978 | 53.47777 | 42.20914 |
| 15421 | TOR1A     | 1883.119 | 0.196785 | 0.111995 | 1.75709  | 0.078902 | 0.136024 | 1889.713 | 1595.158 | 1783.855 | 1995.522 | 1888.835 | 2145.631 |
| 16639 | TOMM40L   | 759.4476 | 0.196609 | 0.126771 | 1.550904 | 0.120925 | 0.193208 | 774.0993 | 669.4846 | 681.121  | 774.5481 | 819.2794 | 838.1529 |
| 25134 | LOC103211 | 9.30073  | 0.196598 | 0.87155  | 0.225572 | 0.821534 | 0.868962 | 9.757555 | 6.568942 | 9.044508 | 17.85702 | 8.556443 | 4.019918 |
| 23676 | LOC119621 | 34.38584 | 0.196529 | 0.430147 | 0.456888 | 0.647752 | 0.727308 | 35.23561 | 29.56024 | 31.30791 | 31.24978 | 42.78221 | 36.17926 |
| 24885 | LOC119621 | 11.29035 | 0.196252 | 0.730633 | 0.268605 | 0.788233 | 0.842081 | 11.9259  | 8.758589 | 11.1317  | 11.16063 | 10.69555 | 14.06971 |
| 19098 | NFIC      | 1346.464 | 0.196098 | 0.167532 | 1.170507 | 0.241797 | 0.336599 | 1011.533 | 1626.908 | 1127.085 | 1354.901 | 1493.099 | 1465.26  |
| 23189 | LOC103211 | 54.49909 | 0.196082 | 0.368959 | 0.531447 | 0.595109 | 0.682262 | 53.12446 | 60.76271 | 38.26523 | 49.10679 | 68.45154 | 57.28383 |
| 24852 | LOC119621 | 13.61554 | 0.196021 | 0.716512 | 0.273577 | 0.78441  | 0.839109 | 6.505036 | 17.51718 | 13.91463 | 17.85702 | 12.83466 | 13.06473 |
| 16429 | DNAJC16   | 1385.918 | 0.195976 | 0.123706 | 1.584203 | 0.113147 | 0.183092 | 1223.489 | 1473.633 | 1180.656 | 1428.561 | 1452.456 | 1556.713 |
| 24246 | CFAP206   | 26.18926 | 0.195716 | 0.530742 | 0.368759 | 0.712308 | 0.780991 | 34.69353 | 19.15941 | 18.78475 | 35.71403 | 25.66933 | 23.11453 |
| 19090 | SSBP4     | 952.2418 | 0.19567  | 0.167047 | 1.171346 | 0.24146  | 0.33626  | 1047.311 | 676.0536 | 942.0203 | 1035.707 | 921.9567 | 1090.403 |
| 17911 | SLC25A25  | 536.6017 | 0.195629 | 0.143894 | 1.359532 | 0.173978 | 0.258233 | 556.1806 | 478.4379 | 468.2272 | 560.2639 | 545.4732 | 611.0275 |
| 17437 | RTN4IP1   | 736.2295 | 0.195628 | 0.137744 | 1.420231 | 0.155541 | 0.237142 | 760.5472 | 610.9116 | 690.1655 | 790.173  | 729.4367 | 836.1429 |
| 14141 | TMX1      | 3387.934 | 0.195479 | 0.098364 | 1.987297 | 0.04689  | 0.088152 | 3313.774 | 2902.925 | 3261.589 | 3700.867 | 3446.107 | 3702.344 |
| 15684 | TEF       | 1418.512 | 0.195306 | 0.113571 | 1.719681 | 0.08549  | 0.14491  | 1295.044 | 1437.503 | 1238.402 | 1502.221 | 1428.926 | 1608.972 |
| 25546 | CHRNA9    | 3.974373 | 0.195229 | 1.234319 | 0.158167 | 0.874325 | 0.909885 | 5.96295  | 1.642235 | 3.478657 | 4.464254 | 4.278221 | 4.019918 |
| 17340 | TM2D1     | 1135.363 | 0.195081 | 0.135438 | 1.440369 | 0.149763 | 0.229605 | 1112.903 | 887.3546 | 1174.395 | 1229.902 | 1259.936 | 1147.687 |
| 16221 | CCSER2    | 2643.309 | 0.194972 | 0.120098 | 1.623444 | 0.104494 | 0.171259 | 2251.827 | 2875.554 | 2268.084 | 2745.516 | 2838.6   | 2880.271 |
| 15876 | KLHL42    | 2204.195 | 0.19487  | 0.11543  | 1.688206 | 0.091372 | 0.153006 | 2049.086 | 2204.427 | 1918.131 | 2028.574 | 2402.221 | 2568.728 |
| 13043 | BACH1     | 4140.347 | 0.194828 | 0.088684 | 2.196875 | 0.028029 | 0.057132 | 3969.156 | 3808.344 | 3811.216 | 4299.077 | 4293.195 | 4661.095 |
| 25444 | PSORS1C1  | 6.031236 | 0.194763 | 1.12282  | 0.173459 | 0.862291 | 0.900959 | 7.589209 | 3.831883 | 5.565851 | 11.16063 | 0        | 8.039836 |
| 19097 | ZNF17     | 391.1931 | 0.194709 | 0.166349 | 1.170489 | 0.241804 | 0.336599 | 356.1507 | 413.2959 | 325.6023 | 372.7652 | 449.2132 | 430.1312 |
| 22313 | LOC103241 | 83.80594 | 0.194647 | 0.289203 | 0.673044 | 0.500919 | 0.596824 | 79.14461 | 70.06871 | 84.1835  | 91.51721 | 100.5382 | 77.38342 |
| 18514 | ANTKMT    | 443.5883 | 0.194613 | 0.155794 | 1.249175 | 0.211601 | 0.303847 | 447.7633 | 355.8177 | 438.3108 | 466.5145 | 472.7435 | 480.3802 |
| 20976 | EFCAB6    | 162.6167 | 0.194612 | 0.220625 | 0.882095 | 0.377725 | 0.478729 | 146.9054 | 166.9606 | 139.842  | 200.8914 | 158.2942 | 162.8067 |
| 18744 | LOC103231 | 1229.936 | 0.194591 | 0.158794 | 1.225428 | 0.220414 | 0.312618 | 1051.105 | 1434.766 | 956.6306 | 1339.276 | 1197.902 | 1399.936 |
| 13440 | PSMA4     | 5871.665 | 0.194536 | 0.091789 | 2.119375 | 0.034059 | 0.06737  | 5200.235 | 5809.134 | 5414.877 | 6424.061 | 6447.28  | 5934.404 |
| 25379 | TRNAL-UA1 | 5.617153 | 0.19449  | 1.051603 | 0.184946 | 0.853272 | 0.893819 | 5.96295  | 2.737059 | 6.957314 | 4.464254 | 8.556443 | 5.024897 |
| 23993 | AFF3      | 41.15619 | 0.194476 | 0.477464 | 0.40731  | 0.68378  | 0.75765  | 34.15144 | 44.34036 | 34.78657 | 55.80317 | 57.75599 | 20.09959 |
| 15432 | SCIN      | 1477.022 | 0.194402 | 0.110766 | 1.755074 | 0.079247 | 0.13652  | 1374.189 | 1433.672 | 1329.543 | 1584.81  | 1437.482 | 1702.435 |
| 19727 | LOC119621 | 391.3929 | 0.19438  | 0.182593 | 1.064557 | 0.287076 | 0.386877 | 366.9925 | 341.0376 | 391.6968 | 421.872  | 327.2839 | 499.4748 |
| 17970 | LRCH1     | 697.5072 | 0.19438  | 0.144153 | 1.348429 | 0.177521 | 0.262626 | 605.5105 | 759.2602 | 587.1973 | 729.9055 | 744.4105 | 758.7595 |
| 22350 | LEMD1     | 99.24762 | 0.194223 | 0.291289 | 0.666769 | 0.50492  | 0.600568 | 85.64965 | 81.01695 | 109.2298 | 120.5349 | 117.6511 | 81.40334 |
| 25297 | TRNAF-GA  | 6.594682 | 0.194146 | 0.973686 |          |          |          |          |          |          |          |          |          |



|       |           |          |          |          |          |          |          |          |          |          |          |          |          |
|-------|-----------|----------|----------|----------|----------|----------|----------|----------|----------|----------|----------|----------|----------|
| 23561 | LOC119618 | 43.4551  | 0.193524 | 0.407452 | 0.474961 | 0.634814 | 0.716261 | 31.9831  | 45.43518 | 43.13534 | 55.80317 | 49.19955 | 35.17428 |
| 16385 | UBC       | 104312.6 | 0.193088 | 0.121336 | 1.591342 | 0.111533 | 0.180964 | 108954.5 | 84224.78 | 98855.08 | 106343   | 101316.8 | 126181.2 |
| 22954 | SPNS3     | 100.0629 | 0.193066 | 0.338465 | 0.570415 | 0.568396 | 0.658308 | 105.1648 | 61.31012 | 112.7085 | 147.3204 | 83.42532 | 90.44815 |
| 17417 | PDK1      | 877.6787 | 0.192926 | 0.135243 | 1.426511 | 0.153721 | 0.234629 | 906.3684 | 738.4585 | 816.7886 | 879.458  | 889.87   | 1035.129 |
| 13780 | PEX13     | 2094.491 | 0.192346 | 0.093778 | 2.051079 | 0.040259 | 0.07767  | 1997.046 | 1924.153 | 1946.656 | 2145.074 | 2254.623 | 2299.393 |
| 16557 | CCDC107   | 270.2773 | 0.192235 | 0.122869 | 1.564546 | 0.117689 | 0.18897  | 673.2713 | 690.8337 | 653.9875 | 801.3336 | 712.3239 | 789.9139 |
| 21959 | TMEM74    | 99.88049 | 0.19215  | 0.261699 | 0.734242 | 0.462801 | 0.560246 | 87.27591 | 100.1764 | 93.228   | 98.21359 | 104.8164 | 115.5726 |
| 23400 | LOC103215 | 48.08315 | 0.192043 | 0.38501  | 0.498801 | 0.61792  | 0.70201  | 44.99317 | 41.6033  | 49.39693 | 35.71403 | 53.47777 | 63.31371 |
| 24641 | PRR18     | 18.5266  | 0.191904 | 0.621905 | 0.308574 | 0.757646 | 0.817396 | 15.17842 | 19.70683 | 16.00182 | 24.5534  | 25.66933 | 10.04979 |
| 14053 | FRS2      | 1798.72  | 0.191843 | 0.095709 | 2.004454 | 0.045021 | 0.08517  | 1659.326 | 1744.601 | 1633.577 | 1917.397 | 1920.921 | 1916.496 |
| 11997 | TAF7      | 5897.103 | 0.191813 | 0.079695 | 2.406827 | 0.016092 | 0.035657 | 5528.739 | 5524.48  | 5463.578 | 6218.706 | 6365.993 | 6281.122 |
| 21977 | GPR21     | 116.056  | 0.191727 | 0.262035 | 0.731685 | 0.464361 | 0.561725 | 123.5957 | 88.1333  | 114.0999 | 109.3742 | 130.4858 | 130.6473 |
| 15082 | OXNAD1    | 2106.586 | 0.191701 | 0.105373 | 1.81926  | 0.068872 | 0.1214   | 2049.086 | 1777.446 | 2072.584 | 2292.394 | 2263.179 | 2184.825 |
| 24717 | BLID      | 17.21815 | 0.191512 | 0.647104 | 0.295953 | 0.767266 | 0.825324 | 20.0572  | 8.758589 | 19.48048 | 13.39276 | 23.53022 | 18.08963 |
| 18111 | ACACB     | 648.8973 | 0.191365 | 0.145077 | 1.319055 | 0.187151 | 0.274717 | 554.5544 | 612.5538 | 656.0747 | 636.1562 | 648.1505 | 785.8939 |
| 24737 | LOC119628 | 17.62366 | 0.191234 | 0.653599 | 0.292586 | 0.769839 | 0.82735  | 24.39389 | 13.13788 | 12.52316 | 17.85702 | 10.69555 | 27.13445 |
| 15401 | ARMC9     | 1219.968 | 0.191148 | 0.108637 | 1.759511 | 0.078491 | 0.135493 | 1211.021 | 1087.16  | 1117.345 | 1337.044 | 1306.997 | 1260.244 |
| 16202 | ARFGEF1   | 4637.393 | 0.191126 | 0.117493 | 1.626701 | 0.103801 | 0.170326 | 4059.685 | 5067.939 | 3864.788 | 4910.679 | 4862.199 | 5059.067 |
| 16270 | AMOTL1    | 7051.811 | 0.191074 | 0.118404 | 1.613745 | 0.106583 | 0.174155 | 5999.812 | 7581.106 | 6180.182 | 7410.662 | 6909.327 | 8229.777 |
| 22681 | CDNF      | 68.66554 | 0.191063 | 0.312942 | 0.610537 | 0.541506 | 0.634821 | 57.46116 | 70.06871 | 64.00729 | 78.12444 | 77.00798 | 65.32367 |
| 24092 | LOC119626 | 35.78596 | 0.191028 | 0.487871 | 0.391554 | 0.695387 | 0.767313 | 22.76763 | 52.00412 | 25.04633 | 37.94616 | 42.78221 | 34.1693  |
| 17447 | RAC3      | 559.2467 | 0.190785 | 0.134443 | 1.419078 | 0.155876 | 0.237521 | 555.6385 | 487.7439 | 525.2772 | 587.0494 | 579.699  | 620.0723 |
| 16203 | TMED4     | 4486.111 | 0.190774 | 0.117279 | 1.626665 | 0.103808 | 0.170326 | 4653.269 | 3682.987 | 4239.091 | 4640.592 | 4438.655 | 5262.073 |
| 20795 | CUNH1orf1 | 407.7093 | 0.190549 | 0.210593 | 0.904821 | 0.36556  | 0.467325 | 464.568  | 262.7577 | 416.0474 | 417.4077 | 434.2395 | 451.2358 |
| 24414 | LOC119625 | 22.1942  | 0.190523 | 0.553044 | 0.344498 | 0.730471 | 0.795428 | 17.88885 | 27.918   | 16.69755 | 17.85702 | 25.66933 | 27.13445 |
| 13088 | LOC103215 | 3108.312 | 0.190482 | 0.08698  | 2.189937 | 0.028529 | 0.057946 | 2883.357 | 2971.899 | 2854.586 | 3379.44  | 3247.17  | 3313.417 |
| 18947 | LOC103235 | 1147.167 | 0.19045  | 0.159358 | 1.195106 | 0.232045 | 0.325589 | 1227.826 | 850.1305 | 1140.999 | 1187.492 | 1086.668 | 1389.887 |
| 24325 | LOC119625 | 22.83564 | 0.190391 | 0.53184  | 0.357986 | 0.720354 | 0.78728  | 21.14137 | 19.15941 | 23.65487 | 17.85702 | 32.08666 | 23.11453 |
| 22500 | LOC103226 | 103.1177 | 0.190301 | 0.297719 | 0.639197 | 0.522695 | 0.617615 | 106.2489 | 69.5213  | 112.0128 | 127.2312 | 111.2338 | 92.45811 |
| 17242 | TRAPPC4   | 2056.319 | 0.190258 | 0.130314 | 1.459995 | 0.144291 | 0.222479 | 2147.746 | 1580.925 | 2036.406 | 2149.538 | 2136.972 | 2286.328 |
| 16520 | BSCL2     | 1323.927 | 0.190217 | 0.121039 | 1.571536 | 0.116058 | 0.186768 | 1336.243 | 1126.026 | 1252.316 | 1406.24  | 1294.162 | 1528.574 |
| 15321 | TNKS      | 2785.898 | 0.19001  | 0.106986 | 1.776027 | 0.075728 | 0.131404 | 2424.752 | 2866.796 | 2520.635 | 2881.676 | 2857.852 | 3163.675 |
| 18582 | SLC39A13  | 2108.924 | 0.190002 | 0.15352  | 1.237633 | 0.215852 | 0.308817 | 2244.78  | 1525.637 | 2144.94  | 2120.521 | 2077.076 | 2540.588 |
| 20790 | ATPLP1    | 188.1232 | 0.189926 | 0.209637 | 0.959578 | 0.364948 | 0.466673 | 153.9525 | 201.4475 | 171.8456 | 189.7308 | 211.772  | 199.9909 |
| 22289 | LOC119625 | 104.2165 | 0.1898   | 0.280789 | 0.675951 | 0.499072 | 0.595263 | 111.6698 | 89.77554 | 88.35788 | 124.9991 | 124.0684 | 86.42823 |
| 18287 | LOC119625 | 618.3591 | 0.189786 | 0.147588 | 1.285913 | 0.198473 | 0.288534 | 625.5677 | 500.3344 | 608.7649 | 696.4236 | 594.6728 | 684.391  |
| 25593 | LOC103245 | 3.964623 | 0.189751 | 1.241072 | 0.152893 | 0.878483 | 0.912533 | 4.336691 | 4.379295 | 2.087194 | 6.696381 | 4.278221 | 2.009959 |
| 16343 | TMTCC3    | 6724.268 | 0.189712 | 0.118804 | 1.596846 | 0.1103   | 0.179424 | 5830.139 | 7371.995 | 5648.643 | 7035.664 | 6866.545 | 7592.62  |
| 16572 | PPTC7     | 1368.859 | 0.189623 | 0.121387 | 1.562138 | 0.118256 | 0.189707 | 1184.459 | 1395.9   | 1262.057 | 1366.062 | 1394.7   | 1609.977 |
| 15133 | REEP3     | 8158.877 | 0.189558 | 0.104788 | 1.808967 | 0.070456 | 0.123767 | 7046.581 | 8676.477 | 7147.248 | 8727.616 | 8661.259 | 8694.077 |
| 24547 | LOC103218 | 21.78599 | 0.189509 | 0.585557 | 0.323639 | 0.746211 | 0.808165 | 27.6464  | 18.06459 | 14.61036 | 20.08914 | 34.22577 | 16.07967 |
| 16411 | GPRC5B    | 4007.848 | 0.189415 | 0.119372 | 1.586769 | 0.112565 | 0.182344 | 3506.757 | 4275.834 | 3457.785 | 4118.274 | 3968.05  | 4720.389 |
| 14160 | PHLDB1    | 12106.87 | 0.189263 | 0.095441 | 1.983045 | 0.047362 | 0.088922 | 10931.71 | 11791.25 | 11225.63 | 12854.82 | 11814.31 | 14023.48 |
| 22547 | C1RL      | 96.49977 | 0.189139 | 0.299136 | 0.632283 | 0.527202 | 0.62162  | 110.5856 | 70.61612 | 88.35788 | 124.9991 | 91.98176 | 92.45811 |
| 18342 | PYROXD2   | 402.2024 | 0.189093 | 0.148181 | 1.276094 | 0.201922 | 0.292667 | 377.8342 | 357.4599 | 393.0882 | 448.6575 | 400.0137 | 436.1611 |
| 24060 | LOC103224 | 32.48266 | 0.189087 | 0.478275 | 0.395352 | 0.692583 | 0.765267 | 39.03022 | 20.25424 | 32.00364 | 26.78552 | 40.6431  | 36.17926 |
| 24758 | TRNAF-GA  | 15.24558 | 0.188993 | 0.65473  | 0.288659 | 0.772843 | 0.829863 | 12.46799 | 18.612   | 11.1317  | 20.08914 | 17.11289 | 12.05975 |
| 17097 | UFSP2     | 1367.692 | 0.188909 | 0.127454 | 1.482178 | 0.138293 | 0.215039 | 1175.243 | 1487.318 | 1172.307 | 1455.347 | 1439.621 | 1476.315 |
| 13687 | PDHB      | 3749.04  | 0.188729 | 0.091096 | 2.071752 | 0.038289 | 0.07437  | 3644.447 | 3428.988 | 3443.175 | 3988.811 | 3799.061 | 4189.759 |
| 14932 | CMPPK1    | 4102.356 | 0.188454 | 0.101988 | 1.847796 | 0.064632 | 0.115071 | 3591.322 | 4263.791 | 3649.807 | 4245.506 | 4440.794 | 4422.915 |
| 24915 | TRNAS-GCI | 11.95063 | 0.188445 | 0.720025 | 0.261719 | 0.793538 | 0.846727 | 11.38381 | 8.211177 | 13.91463 | 11.16063 | 14.97377 | 12.05975 |
| 22655 | SAXO2     | 101.3758 | 0.188426 | 0.306787 | 0.614191 | 0.539089 | 0.632606 | 94.32303 | 72.80577 | 115.4914 | 111.6063 | 132.6249 | 81.40334 |
| 16037 | CALM3     | 10037.27 | 0.188401 | 0.113601 | 1.658441 | 0.097228 | 0.161178 | 8542.197 | 10966.3  | 8640.288 | 10803.49 | 10385.38 | 10885.94 |
| 15990 | GMPS      | 5556.67  | 0.188053 | 0.112759 | 1.667737 | 0.095368 | 0.158559 | 4895.582 | 5997.444 | 4693.404 | 5868.262 | 5749.929 | 6135.4   |
| 23819 | LOC103234 | 36.74734 | 0.187878 | 0.432518 | 0.434382 | 0.664011 | 0.74112  | 31.9831  | 36.67659 | 33.39511 | 37.94616 | 51.33866 | 29.1444  |
| 17040 | RWDD2B    | 981.7835 | 0.187545 | 0.126097 | 1.487307 | 0.136934 | 0.213638 | 847.281  | 1030.229 | 875.9258 | 1008.912 | 1095.225 | 1033.119 |
| 24302 | LOC103215 | 24.6239  | 0.187493 | 0.518928 | 0.361309 | 0.717869 | 0.785307 | 17.34676 | 23.53871 | 27.82925 | 31.24978 | 25.66933 | 22.10955 |
| 17886 | BBS12     | 493.2586 | 0.18745  | 0.137555 | 1.362731 | 0.172967 | 0.257092 | 469.4468 | 472.4164 | 443.1809 | 537.9426 | 489.8563 | 546.7088 |
| 21603 | ADRB1     | 132.2614 | 0.187415 | 0.237247 | 0.789957 | 0.429553 | 0.528615 | 106.791  | 137.4004 | 127.3188 | 136.1597 | 141.1813 | 144.717  |
| 18235 | DAGLA     | 2634.584 | 0.187187 | 0.144615 | 1.294382 | 0.195534 | 0.285047 | 2815.597 | 1954.808 | 2625.69  | 2718.731 | 2571.211 | 3121.466 |
| 14178 | UBR1      | 3492.441 | 0.187004 | 0.094441 | 1.980107 | 0.047692 | 0.089425 | 3411.35  | 3149.26  | 3244.195 | 3591.492 | 3593.706 | 3964.644 |
| 15556 | PANK3     | 6471.769 | 0.186885 | 0.107712 | 1.735042 | 0.082733 | 0.14139  | 5849.654 | 6831.699 | 5480.972 | 6616.024 | 6785.259 | 7267.007 |
| 21753 | LOC103245 | 134.7965 | 0.186803 | 0.2432   | 0.768104 | 0.442426 | 0.540702 | 111.1277 | 147.8012 | 118.2743 | 140.624  | 158.2942 | 132.6573 |
| 15606 | NDUF55    | 4889.922 | 0.186542 | 0.107909 | 1.728705 | 0.083862 | 0.14286  | 4782.286 | 3988.99  | 4949.433 | 5307.998 | 5322.107 | 4988.718 |
| 14405 | SUCO      | 4200.403 | 0.18652  | 0.096033 | 1.942245 | 0.052107 | 0.096166 | 3964.278 | 4182.226 | 3644.241 | 4381.665 | 4348.812 | 4681.194 |
| 22965 | LOC119615 | 60.16092 | 0.186401 | 0.327531 | 0.569111 | 0.569281 | 0.659017 | 60.71367 | 51.45671 | 56.35424 | 66.96381 | 64.71332 | 61.30375 |
| 23978 | LOC103215 | 36.57147 | 0.186017 | 0.453489 | 0.410191 | 0.681666 | 0.75578  | 26.56223 | 29.56024 | 45.91827 | 40.17829 | 47.06043 | 30.14938 |
| 19935 | RABAC1    | 997.6552 | 0.186014 | 0.178613 | 1.041439 | 0.297672 | 0.396971 | 1075.499 | 669.4846 | 1057.512 | 1082.582 | 956.1825 | 1144.672 |
| 15271 | FBXO3     | 1900.612 | 0.185937 | 0.104192 | 1.784553 | 0.074334 | 0.129398 | 1675.589 | 1920.868 | 1737.937 | 1957.575 | 2102.746 | 2008.954 |
| 17977 | LOC103234 | 620.5543 | 0.185909 | 0.137995 | 1.347216 |          |          |          |          |          |          |          |          |



|       |           |          |          |          |          |          |          |          |          |          |          |          |          |
|-------|-----------|----------|----------|----------|----------|----------|----------|----------|----------|----------|----------|----------|----------|
| 14700 | TBCB      | 1853.32  | 0.185232 | 0.097976 | 1.890585 | 0.05868  | 0.106123 | 1761.781 | 1719.968 | 1726.11  | 1944.183 | 1884.556 | 2083.322 |
| 24963 | LOC119622 | 12.01277 | 0.18522  | 0.733539 | 0.252501 | 0.800654 | 0.852643 | 15.17842 | 8.211177 | 10.43597 | 15.62489 | 8.556443 | 14.06971 |
| 21546 | ZNF585B   | 147.8252 | 0.185099 | 0.232016 | 0.797786 | 0.424995 | 0.524389 | 136.6058 | 154.9175 | 125.2316 | 136.1597 | 156.1551 | 177.8814 |
| 18352 | BAZ2B     | 2293.088 | 0.184884 | 0.145251 | 1.272857 | 0.203069 | 0.294168 | 1920.612 | 2683.96  | 1833.252 | 2499.982 | 2410.778 | 2409.941 |
| 16592 | PIP4P1    | 1304.542 | 0.184861 | 0.118628 | 1.558333 | 0.119154 | 0.190919 | 1255.472 | 1216.896 | 1197.354 | 1332.58  | 1264.214 | 1560.733 |
| 17228 | CNST      | 1030.148 | 0.184441 | 0.126053 | 1.463198 | 0.143413 | 0.221305 | 892.8163 | 1065.811 | 937.8459 | 1006.689 | 1105.92  | 1171.806 |
| 24337 | IGF2BP1   | 34.57486 | 0.184012 | 0.515831 | 0.356729 | 0.721294 | 0.78792  | 27.6464  | 31.74989 | 36.17803 | 40.17829 | 55.61688 | 16.07967 |
| 16720 | LRRC7     | 760.5946 | 0.183797 | 0.11946  | 1.538563 | 0.123911 | 0.19702  | 700.9177 | 739.0059 | 699.21   | 790.173  | 785.0536 | 849.2077 |
| 24819 | LOC103222 | 17.96506 | 0.183708 | 0.662016 | 0.277497 | 0.781398 | 0.836966 | 20.59928 | 7.116354 | 22.95914 | 15.62489 | 21.39111 | 20.09959 |
| 14216 | ALDH9A1   | 5805.673 | 0.183636 | 0.093027 | 1.974003 | 0.048381 | 0.090471 | 5669.139 | 5165.378 | 5481.667 | 6040.136 | 5873.998 | 6603.72  |
| 25857 | LOC119622 | 2.351105 | 0.183572 | 1.660507 | 0.110552 | 0.911972 | 0.937654 | 1.626259 | 3.831883 | 1.391463 | 2.232127 | 0        | 5.024897 |
| 16958 | RCOR1     | 1498.514 | 0.183341 | 0.122396 | 1.49793  | 0.134151 | 0.210301 | 1325.401 | 1549.723 | 1339.979 | 1566.953 | 1450.317 | 1758.714 |
| 17867 | PHF13     | 1255.451 | 0.183295 | 0.134106 | 1.366799 | 0.171688 | 0.255455 | 1319.98  | 1066.358 | 1146.565 | 1247.759 | 1238.545 | 1513.499 |
| 16027 | RDX       | 8016.909 | 0.183094 | 0.110251 | 1.660705 | 0.096773 | 0.160505 | 6907.265 | 8676.477 | 6941.312 | 8450.833 | 8733.989 | 8391.579 |
| 17362 | ADAM33    | 1833.668 | 0.18302  | 0.127395 | 1.436638 | 0.150821 | 0.23094  | 1863.151 | 1490.055 | 1804.031 | 1953.111 | 1754.071 | 2137.591 |
| 19779 | GRIK2     | 259.399  | 0.182817 | 0.173059 | 1.05638  | 0.290794 | 0.390847 | 249.9018 | 241.4086 | 236.5487 | 299.105  | 263.1106 | 266.3196 |
| 15573 | MAN2A2    | 3620.938 | 0.182779 | 0.10547  | 1.732999 | 0.083096 | 0.141855 | 3563.676 | 3233.014 | 3386.125 | 3754.438 | 3525.254 | 4263.123 |
| 20104 | GLRX      | 648.2339 | 0.182764 | 0.180588 | 1.012052 | 0.311513 | 0.41194  | 522.0292 | 788.8204 | 509.9711 | 689.7272 | 699.4892 | 679.3661 |
| 25240 | LOC119622 | 7.675589 | 0.182713 | 0.872684 | 0.20937  | 0.83416  | 0.878611 | 7.589209 | 7.116354 | 6.957314 | 8.928508 | 6.417332 | 9.044815 |
| 23863 | CUNH10orf | 34.61879 | 0.182615 | 0.426403 | 0.428268 | 0.668456 | 0.744706 | 34.69353 | 32.2973  | 29.91645 | 42.41041 | 34.22577 | 34.1693  |
| 16426 | MED12     | 2375.283 | 0.182352 | 0.115043 | 1.585076 | 0.112949 | 0.182805 | 2006.262 | 2519.737 | 2152.593 | 2448.643 | 2481.368 | 2643.096 |
| 19701 | BLOC1S1   | 2039.809 | 0.182312 | 0.17045  | 1.069592 | 0.284803 | 0.38432  | 2133.11  | 1337.874 | 2263.91  | 2183.02  | 2072.798 | 2248.139 |
| 15840 | CUNH7orf  | 1164.586 | 0.182174 | 0.107638 | 1.692475 | 0.090556 | 0.151982 | 1079.836 | 1111.246 | 1085.341 | 1249.991 | 1163.676 | 1297.428 |
| 16399 | SNX12     | 1728.275 | 0.18214  | 0.114664 | 1.588467 | 0.112181 | 0.18186  | 1731.424 | 1533.848 | 1596.008 | 1917.397 | 1634.281 | 1956.695 |
| 21436 | LOC103232 | 211.9798 | 0.182059 | 0.22389  | 0.813163 | 0.416125 | 0.516079 | 178.8885 | 240.3138 | 175.3243 | 198.6593 | 271.6671 | 207.0258 |
| 16990 | USP46     | 787.362  | 0.182047 | 0.121845 | 1.494089 | 0.135152 | 0.211479 | 749.1634 | 771.3032 | 693.6442 | 861.601  | 787.1927 | 861.2674 |
| 15821 | CETN2     | 9062.508 | 0.182021 | 0.107328 | 1.695938 | 0.089898 | 0.15106  | 7768.64  | 9494.311 | 8206.152 | 9941.894 | 10105.16 | 8858.894 |
| 15405 | WDR55     | 1760.569 | 0.18202  | 0.103481 | 1.75897  | 0.078583 | 0.135607 | 1667.458 | 1722.705 | 1561.917 | 1870.522 | 1769.045 | 1971.77  |
| 15993 | AP2A1     | 3030.421 | 0.182017 | 0.109192 | 1.666934 | 0.095528 | 0.158794 | 2962.502 | 2622.103 | 2940.857 | 3127.21  | 2971.225 | 3558.632 |
| 23181 | LOC119615 | 55.9413  | 0.181967 | 0.341456 | 0.532914 | 0.594093 | 0.681347 | 59.08741 | 50.36189 | 48.00546 | 60.26743 | 55.61688 | 62.30873 |
| 16386 | PARP4     | 5236.832 | 0.181861 | 0.114316 | 1.590859 | 0.111641 | 0.181129 | 4583.34  | 5577.032 | 4566.085 | 5348.176 | 5262.212 | 6084.146 |
| 16920 | GATD3A    | 1700.038 | 0.181734 | 0.120882 | 1.503397 | 0.132737 | 0.208558 | 1778.043 | 1408.491 | 1596.008 | 1705.345 | 1796.853 | 1915.491 |
| 14131 | TMCO1     | 2957.573 | 0.18153  | 0.091304 | 1.988204 | 0.046789 | 0.088026 | 2721.816 | 2841.615 | 2748.139 | 3118.281 | 3300.648 | 3014.938 |
| 18798 | LOC119622 | 649.9057 | 0.18141  | 0.148915 | 1.218215 | 0.223142 | 0.315578 | 627.1939 | 641.0192 | 562.8467 | 709.8164 | 579.699  | 778.951  |
| 14193 | CXXC5     | 5567.162 | 0.181395 | 0.091686 | 1.978446 | 0.047878 | 0.089681 | 5270.164 | 5244.205 | 5144.238 | 5953.083 | 5473.984 | 6317.301 |
| 24990 | YBX2      | 14.21494 | 0.181177 | 0.732897 | 0.247206 | 0.804749 | 0.856112 | 10.84173 | 13.13788 | 15.30609 | 11.16063 | 27.80844 | 7.034856 |
| 17036 | GPR137B   | 700.6444 | 0.181051 | 0.121697 | 1.487721 | 0.136824 | 0.213517 | 647.7932 | 680.9803 | 643.5515 | 720.977  | 733.715  | 776.8491 |
| 24510 | LOC119622 | 20.63945 | 0.18101  | 0.548648 | 0.329919 | 0.741461 | 0.804289 | 16.80468 | 21.34906 | 20.17621 | 17.85702 | 23.53022 | 24.11951 |
| 17675 | MTF1      | 990.9543 | 0.180985 | 0.130225 | 1.389784 | 0.164595 | 0.247567 | 873.3011 | 1044.462 | 872.4471 | 1004.457 | 1005.382 | 1145.677 |
| 13835 | PDI A3    | 8325.376 | 0.180819 | 0.088517 | 2.042765 | 0.041076 | 0.07893  | 7600.051 | 8313.543 | 7502.767 | 8758.866 | 8571.416 | 9205.612 |
| 17579 | HSP90B1   | 42095.8  | 0.180766 | 0.128765 | 1.403844 | 0.160365 | 0.242523 | 35148.34 | 48397.23 | 34841.53 | 44222.9  | 43411.11 | 46553.66 |
| 23618 | LOC103222 | 51.33326 | 0.18044  | 0.387015 | 0.466235 | 0.641047 | 0.721616 | 37.40396 | 48.71965 | 57.04997 | 64.73168 | 59.8951  | 40.19918 |
| 16534 | BTRC      | 2249.046 | 0.18031  | 0.114897 | 1.569318 | 0.116574 | 0.187434 | 1955.848 | 2357.703 | 2016.23  | 2374.983 | 2226.814 | 2562.698 |
| 20043 | ZNF14     | 372.7304 | 0.180284 | 0.176488 | 1.021507 | 0.307014 | 0.407281 | 385.9655 | 327.8997 | 336.0383 | 319.1942 | 449.2132 | 418.0715 |
| 25486 | LOC103242 | 6.275115 | 0.180029 | 1.081204 | 0.166508 | 0.867757 | 0.905176 | 2.168345 | 8.211177 | 6.957314 | 4.464254 | 12.83466 | 3.014938 |
| 15641 | TM9SF4    | 5127.407 | 0.180003 | 0.10426  | 1.726486 | 0.08426  | 0.143217 | 4767.65  | 5041.663 | 4622.439 | 5198.624 | 5041.884 | 6092.186 |
| 13469 | RNF11     | 4404.144 | 0.179934 | 0.085154 | 2.113038 | 0.034598 | 0.068286 | 4132.866 | 4119.274 | 4141.689 | 4649.521 | 4511.384 | 4870.131 |
| 12941 | NDUFV2    | 4938.94  | 0.179735 | 0.081136 | 2.215222 | 0.026745 | 0.054943 | 4640.259 | 4619.608 | 4637.05  | 5167.374 | 5242.96  | 5326.391 |
| 25168 | LOC103232 | 8.981597 | 0.179545 | 0.819889 | 0.218987 | 0.82666  | 0.873202 | 7.047123 | 8.211177 | 9.740239 | 11.16063 | 10.69555 | 7.034856 |
| 14828 | PEC19     | 4688.096 | 0.179487 | 0.096133 | 1.867067 | 0.061892 | 0.110966 | 4306.334 | 4770.694 | 4115.251 | 4993.268 | 4806.582 | 5136.45  |
| 25466 | LOC103238 | 5.639094 | 0.179379 | 1.056941 | 0.169716 | 0.865234 | 0.903265 | 4.878777 | 7.116354 | 3.478657 | 8.928508 | 6.417332 | 3.014938 |
| 16800 | OMA1      | 1095.254 | 0.179269 | 0.117501 | 1.52568  | 0.12709  | 0.201112 | 976.8396 | 1125.479 | 976.8068 | 1185.259 | 1193.624 | 1113.517 |
| 21797 | PNPLA4    | 169.4034 | 0.179245 | 0.235774 | 0.760243 | 0.447109 | 0.545323 | 137.6899 | 179.5511 | 157.2353 | 171.8738 | 220.3284 | 149.7419 |
| 24222 | LOC103242 | 31.29364 | 0.178836 | 0.482295 | 0.370802 | 0.710785 | 0.780129 | 35.7777  | 19.15941 | 32.69937 | 33.4819  | 38.50399 | 28.13943 |
| 25269 | LOC103242 | 9.674301 | 0.178686 | 0.877123 | 0.203719 | 0.838573 | 0.882202 | 16.26259 | 3.831883 | 6.957314 | 13.39276 | 8.556443 | 9.044815 |
| 17961 | LOC119622 | 1736.421 | 0.178651 | 0.132413 | 1.349192 | 0.177275 | 0.262394 | 1891.881 | 1399.732 | 1598.791 | 1743.291 | 1798.992 | 1985.839 |
| 19294 | AKR1A1    | 2135.644 | 0.17856  | 0.157126 | 1.136414 | 0.255784 | 0.35244  | 2322.84  | 1498.814 | 2191.554 | 2319.18  | 2068.52  | 2412.956 |
| 16292 | DDX55     | 1195.058 | 0.178171 | 0.110766 | 1.608535 | 0.107718 | 0.175773 | 1115.072 | 1199.927 | 1047.076 | 1287.937 | 1279.188 | 1241.15  |
| 24371 | CUNH4orf  | 26.57414 | 0.178164 | 0.507667 | 0.350947 | 0.725628 | 0.791536 | 20.59928 | 29.01283 | 24.3506  | 29.01765 | 36.36488 | 20.09959 |
| 18250 | ATP5MC3   | 4883.809 | 0.178041 | 0.137694 | 1.293015 | 0.196006 | 0.285524 | 5184.514 | 3642.478 | 4925.778 | 5069.16  | 4793.747 | 5687.179 |
| 23574 | LOC119622 | 58.83816 | 0.177778 | 0.375729 | 0.473156 | 0.636102 | 0.717348 | 65.05036 | 44.88777 | 54.26705 | 58.0353  | 85.56443 | 45.22408 |
| 15452 | DYNLRB1   | 4538.412 | 0.177713 | 0.101482 | 1.751179 | 0.079915 | 0.13746  | 3976.746 | 4737.849 | 4064.463 | 4805.769 | 4708.183 | 4937.464 |
| 13769 | TMEM50A   | 3893.944 | 0.177555 | 0.086495 | 2.052782 | 0.040094 | 0.077411 | 3681.309 | 3663.28  | 3617.107 | 4325.862 | 4012.972 | 4063.132 |
| 17674 | GGT7      | 3742.167 | 0.177349 | 0.1276   | 1.389885 | 0.164564 | 0.247535 | 3881.338 | 3072.075 | 3590.67  | 3830.33  | 3538.089 | 4540.497 |
| 25982 | TAS2R5    | 1.631586 | 0.177165 | 1.947766 | 0.090958 | 0.927526 | 0.949052 | 2.168345 | 1.642235 | 0.695731 | 0        | 4.278221 | 1.004979 |
| 15368 | ADARB1    | 2830.869 | 0.17707  | 0.100256 | 1.76617  | 0.077367 | 0.133837 | 2698.506 | 2797.274 | 2480.282 | 2955.336 | 2859.991 | 3193.825 |
| 22522 | LOC119622 | 89.99477 | 0.177046 | 0.278    | 0.636855 | 0.52422  | 0.618783 | 96.49137 | 79.92212 | 76.53045 | 100.4457 | 94.12087 | 92.45811 |
| 21938 | FIGNL2    | 146.2938 | 0.177045 | 0.240076 | 0.737456 | 0.460845 | 0.558438 | 124.6799 | 133.5685 | 151.6694 | 156.2489 | 183.9635 | 127.6324 |
| 16293 | PQBP1     | 1430.062 | 0.176991 | 0.110042 | 1.608394 | 0.107749 | 0.175801 | 1306.428 | 1388.236 | 1338.587 | 1439.722 | 1448.178 | 1659.221 |
| 24118 | LOC       |          |          |          |          |          |          |          |          |          |          |          |          |



|       |           |          |          |          |          |          |          |          |          |          |          |          |          |
|-------|-----------|----------|----------|----------|----------|----------|----------|----------|----------|----------|----------|----------|----------|
| 16152 | VGLL4     | 1543.501 | 0.176475 | 0.107795 | 1.637131 | 0.101603 | 0.167231 | 1522.721 | 1405.206 | 1422.075 | 1700.881 | 1501.656 | 1708.465 |
| 21604 | LOC119618 | 151.2803 | 0.176443 | 0.223379 | 0.789883 | 0.429596 | 0.528643 | 157.7471 | 141.2322 | 125.9274 | 165.1774 | 166.8506 | 150.7469 |
| 25332 | LOC10323  | 7.922533 | 0.176117 | 0.906709 | 0.194237 | 0.84599  | 0.887835 | 7.047123 | 8.758589 | 6.261582 | 4.464254 | 14.97377 | 6.029877 |
| 23141 | LOC11962  | 75.42146 | 0.17578  | 0.326669 | 0.538098 | 0.590509 | 0.678378 | 82.39713 | 50.9093  | 78.61764 | 84.82083 | 83.42532 | 72.35852 |
| 20737 | GPLD1     | 208.3704 | 0.175754 | 0.192671 | 0.912196 | 0.361666 | 0.463658 | 209.7874 | 195.426  | 180.1944 | 229.9091 | 228.8848 | 206.0208 |
| 24492 | AK9       | 26.35284 | 0.175751 | 0.528962 | 0.332256 | 0.739696 | 0.802908 | 18.43094 | 26.27577 | 28.52499 | 35.71403 | 32.08666 | 17.08465 |
| 18236 | LOC10323  | 1515.752 | 0.175685 | 0.135737 | 1.294308 | 0.195559 | 0.285047 | 1556.33  | 1241.53  | 1479.125 | 1513.382 | 1461.013 | 1843.132 |
| 16590 | APEH      | 3981.711 | 0.175663 | 0.112686 | 1.558868 | 0.119028 | 0.190738 | 3985.961 | 3501.246 | 3739.556 | 4017.829 | 3858.956 | 4786.717 |
| 16108 | IMPA2     | 1469.208 | 0.175464 | 0.106752 | 1.64366  | 0.100247 | 0.165449 | 1386.657 | 1424.366 | 1333.717 | 1475.436 | 1518.769 | 1676.306 |
| 16770 | PKIG      | 1229.352 | 0.175281 | 0.114542 | 1.530268 | 0.12595  | 0.199665 | 1143.26  | 1201.022 | 1119.432 | 1421.865 | 1185.067 | 1305.468 |
| 16091 | PDXK      | 3070.33  | 0.175246 | 0.10636  | 1.647664 | 0.099422 | 0.164261 | 3033.515 | 2700.93  | 2924.855 | 3120.514 | 3050.372 | 3591.797 |
| 15771 | TNP02     | 6613.665 | 0.174951 | 0.102495 | 1.706929 | 0.087835 | 0.148063 | 6400.956 | 5942.703 | 6304.022 | 6839.237 | 6387.384 | 7807.685 |
| 15255 | NDUFA12   | 2440.122 | 0.174929 | 0.097859 | 1.787565 | 0.073846 | 0.128692 | 2280.557 | 2223.587 | 2368.965 | 2566.946 | 2761.592 | 2439.085 |
| 22808 | LOC10323  | 91.20787 | 0.174776 | 0.295507 | 0.591445 | 0.554222 | 0.646001 | 95.4072  | 80.46954 | 79.31338 | 93.74933 | 121.9293 | 76.37844 |
| 23651 | BTBD19    | 46.78186 | 0.17474  | 0.378573 | 0.461574 | 0.644387 | 0.724254 | 47.16151 | 46.53    | 38.96096 | 49.10679 | 40.6431  | 58.28881 |
| 25879 | TRNAW-CC  | 2.632617 | 0.174659 | 1.640876 | 0.106443 | 0.915231 | 0.940163 | 1.626259 | 2.737059 | 2.782925 | 2.232127 | 6.417332 | 0        |
| 15596 | COPG1     | 10370.76 | 0.174589 | 0.100912 | 1.730101 | 0.083612 | 0.142526 | 9511.447 | 10387.14 | 9340.889 | 10640.55 | 10184.31 | 12160.25 |
| 18038 | ADCY6     | 3287.446 | 0.17451  | 0.130557 | 1.336656 | 0.181335 | 0.267228 | 3475.316 | 2675.202 | 3122.442 | 3316.941 | 3153.049 | 3981.729 |
| 16329 | KDEL1     | 5740.602 | 0.174463 | 0.109057 | 1.599741 | 0.109656 | 0.178529 | 4942.201 | 6139.771 | 5101.102 | 6205.313 | 5784.155 | 6271.072 |
| 25051 | LOC11962  | 13.64052 | 0.174354 | 0.734188 | 0.237479 | 0.812285 | 0.862026 | 15.7205  | 14.23271 | 7.653045 | 20.08914 | 17.11289 | 7.034856 |
| 16370 | ZNF317    | 1489.791 | 0.174218 | 0.109295 | 1.594012 | 0.110933 | 0.180156 | 1393.704 | 1509.762 | 1298.235 | 1558.025 | 1535.881 | 1643.141 |
| 22588 | LOC11962  | 85.65467 | 0.174198 | 0.278221 | 0.626113 | 0.531241 | 0.625245 | 81.85504 | 78.8273  | 80.00911 | 89.28508 | 100.5382 | 83.4133  |
| 17667 | IQGAP1    | 44246.74 | 0.174017 | 0.125008 | 1.392043 | 0.163909 | 0.246648 | 36911.2  | 50092.56 | 37743.43 | 45780.92 | 44756.61 | 50195.71 |
| 24701 | LOC11962  | 19.97899 | 0.173959 | 0.581978 | 0.298909 | 0.765009 | 0.823358 | 23.8518  | 13.13788 | 19.48048 | 15.62489 | 25.66933 | 22.10955 |
| 23504 | TRNAI-AAL | 74.31388 | 0.173939 | 0.359712 | 0.483551 | 0.628705 | 0.711118 | 72.63957 | 44.88777 | 91.14081 | 93.74933 | 79.14709 | 64.31869 |
| 24037 | LOC11962  | 41.47973 | 0.173924 | 0.433581 | 0.401134 | 0.688322 | 0.761254 | 41.74065 | 30.10765 | 43.83108 | 60.26743 | 42.78221 | 30.14938 |
| 17654 | OST4      | 3951.098 | 0.173793 | 0.124552 | 1.395346 | 0.162912 | 0.245327 | 3325.158 | 4400.644 | 3411.171 | 4232.113 | 4380.899 | 3956.604 |
| 18951 | MDH1      | 5009.39  | 0.173638 | 0.145402 | 1.19419  | 0.232404 | 0.326012 | 5414.901 | 3546.134 | 5165.11  | 5381.658 | 5114.614 | 5433.924 |
| 23924 | OA23      | 37.00133 | 0.173533 | 0.413774 | 0.41939  | 0.674931 | 0.750001 | 36.86187 | 37.224   | 29.91645 | 40.17829 | 40.6431  | 37.18424 |
| 18274 | CTTNBP2N  | 2163.09  | 0.173513 | 0.134606 | 1.289042 | 0.197383 | 0.287153 | 1785.633 | 2462.806 | 1851.341 | 2279.002 | 2263.179 | 2336.577 |
| 22027 | LOC10323  | 146.5194 | 0.173372 | 0.240353 | 0.721323 | 0.470711 | 0.568114 | 131.727  | 164.771  | 117.5786 | 154.0168 | 141.1813 | 169.8415 |
| 17117 | STX8      | 992.9493 | 0.173259 | 0.117184 | 1.478518 | 0.139269 | 0.216304 | 930.7623 | 890.0916 | 978.894  | 988.8323 | 1138.007 | 1031.109 |
| 24778 | NMUR1     | 20.64495 | 0.173155 | 0.605839 | 0.28581  | 0.775024 | 0.831574 | 16.80468 | 20.80165 | 19.48048 | 26.78552 | 29.94755 | 10.04979 |
| 17534 | TPST1     | 1308.913 | 0.173005 | 0.122592 | 1.411217 | 0.158181 | 0.239833 | 1329.196 | 1078.949 | 1285.712 | 1408.472 | 1306.997 | 1444.155 |
| 18229 | VPS37C    | 503.1299 | 0.172866 | 0.1334   | 1.295849 | 0.195028 | 0.284426 | 488.9619 | 470.7742 | 458.487  | 540.1747 | 534.7777 | 525.6043 |
| 16011 | MRPL49    | 3275.011 | 0.172858 | 0.103967 | 1.662631 | 0.096386 | 0.160044 | 2963.586 | 3403.807 | 2871.283 | 3511.136 | 3313.482 | 3586.772 |
| 18516 | ZNF513    | 757.5811 | 0.172799 | 0.1384   | 1.248547 | 0.211831 | 0.304143 | 743.2004 | 668.9372 | 725.6478 | 895.0829 | 684.5154 | 828.1031 |
| 16516 | VOPP1     | 3167.988 | 0.172758 | 0.109869 | 1.572398 | 0.115858 | 0.186492 | 3189.094 | 2796.18  | 2957.554 | 3109.353 | 3217.222 | 3738.524 |
| 17647 | PIP4P2    | 644.8936 | 0.17267  | 0.123583 | 1.397198 | 0.162354 | 0.244584 | 600.0896 | 627.8814 | 589.9802 | 703.12   | 675.959  | 672.3313 |
| 15922 | PTER      | 1371.546 | 0.172482 | 0.102624 | 1.680717 | 0.092818 | 0.154978 | 1237.583 | 1342.801 | 1287.103 | 1482.132 | 1454.995 | 1425.061 |
| 25261 | LOC11962  | 9.048633 | 0.172337 | 0.837819 | 0.205697 | 0.837027 | 0.880898 | 5.96295  | 12.04306 | 7.653045 | 11.16063 | 6.417332 | 11.05477 |
| 23849 | LOC11962  | 41.92614 | 0.172058 | 0.399762 | 0.4304   | 0.666905 | 0.743413 | 42.82482 | 39.96106 | 34.78657 | 40.17829 | 55.61688 | 38.18922 |
| 17045 | SPATS2L   | 5536.359 | 0.172053 | 0.115705 | 1.487003 | 0.137014 | 0.2137   | 4854.926 | 6045.616 | 4721.233 | 5861.565 | 5587.357 | 6147.459 |
| 23648 | PSPN      | 46.00811 | 0.171937 | 0.372244 | 0.461894 | 0.644157 | 0.724173 | 44.45108 | 41.05589 | 43.83108 | 46.87467 | 55.61688 | 44.2191  |
| 20256 | BICRAL    | 675.2381 | 0.171578 | 0.173879 | 0.986765 | 0.323758 | 0.424934 | 567.5644 | 794.842  | 545.4534 | 642.8526 | 703.7674 | 796.9487 |
| 12523 | YWHAQ     | 23393.82 | 0.171522 | 0.074668 | 2.29711  | 0.021612 | 0.045881 | 22062.37 | 22072.74 | 21877.27 | 24810.09 | 25117.44 | 24423.01 |
| 19923 | RAB40B    | 376.6766 | 0.171414 | 0.164244 | 1.043653 | 0.296646 | 0.395841 | 358.8612 | 396.8736 | 306.1218 | 406.2471 | 400.0137 | 391.942  |
| 21947 | SPA17     | 209.5824 | 0.171243 | 0.23246  | 0.736655 | 0.461332 | 0.558824 | 163.7101 | 247.9776 | 177.4115 | 236.6055 | 243.8586 | 187.9312 |
| 23277 | LOC11961  | 74.24038 | 0.171241 | 0.331256 | 0.516945 | 0.605194 | 0.691171 | 85.64965 | 52.55153 | 72.35606 | 78.12444 | 66.31243 | 90.44815 |
| 21601 | LOC10322  | 156.8303 | 0.17115  | 0.216534 | 0.790406 | 0.429291 | 0.528341 | 156.663  | 141.7797 | 145.4079 | 169.6417 | 147.5986 | 179.8913 |
| 19141 | CUNH2orf  | 534.6523 | 0.171087 | 0.147155 | 1.162634 | 0.244978 | 0.340251 | 499.2615 | 558.3601 | 453.6169 | 540.1747 | 545.4732 | 611.0275 |
| 25046 | LOC10323  | 13.29214 | 0.171086 | 0.718208 | 0.238213 | 0.811716 | 0.861593 | 8.131296 | 15.32753 | 13.91463 | 8.928508 | 21.39111 | 12.05975 |
| 17666 | LSM10     | 1578.278 | 0.171062 | 0.122871 | 1.392201 | 0.163861 | 0.24659  | 1531.394 | 1290.797 | 1634.273 | 1732.131 | 1561.551 | 1719.52  |
| 18292 | SMAD1     | 783.54   | 0.170976 | 0.133091 | 1.284651 | 0.198914 | 0.28908  | 724.2274 | 826.5918 | 658.8576 | 850.4404 | 832.114  | 809.0085 |
| 17943 | IFF4      | 9178.317 | 0.170962 | 0.126396 | 1.352593 | 0.176186 | 0.261043 | 7711.179 | 10422.17 | 7774.102 | 9386.094 | 9510.486 | 10265.87 |
| 16310 | AFT172    | 1580.559 | 0.170858 | 0.106507 | 1.604202 | 0.10867  | 0.17713  | 1434.903 | 1594.611 | 1434.598 | 1591.507 | 1677.063 | 1750.674 |
| 19773 | ATXN7L2   | 328.3167 | 0.170781 | 0.161526 | 1.057299 | 0.290375 | 0.390394 | 310.0734 | 297.2446 | 322.1236 | 319.1942 | 344.3968 | 376.8673 |
| 15043 | ARL4C     | 7845.031 | 0.170434 | 0.093362 | 1.825512 | 0.067924 | 0.12004  | 7674.859 | 7300.284 | 7178.556 | 8066.907 | 7824.867 | 9024.716 |
| 18917 | ZNF846    | 529.6501 | 0.170353 | 0.141896 | 1.200546 | 0.229927 | 0.323128 | 551.8439 | 455.4466 | 487.7077 | 566.9603 | 556.1688 | 559.7736 |
| 22878 | LOC10322  | 78.12901 | 0.170323 | 0.292448 | 0.582407 | 0.560293 | 0.651097 | 69.92914 | 82.11177 | 68.18167 | 82.5887  | 85.56443 | 80.39836 |
| 24595 | LOC11962  | 22.29367 | 0.170147 | 0.536694 | 0.317029 | 0.751222 | 0.812004 | 21.14137 | 24.08612 | 17.39328 | 20.08914 | 29.94755 | 21.10457 |
| 26007 | PITX3     | 1.989197 | 0.169926 | 1.983133 | 0.085685 | 0.931716 | 0.952424 | 2.168345 | 0        | 3.478657 | 0        | 4.278221 | 2.009959 |
| 14923 | CSNK1G1   | 2723.146 | 0.169877 | 0.091826 | 1.849985 | 0.064316 | 0.114577 | 2557.021 | 2662.064 | 2472.629 | 2823.641 | 2840.739 | 2982.779 |
| 21325 | PCDHB14   | 483.6653 | 0.169841 | 0.205008 | 0.828463 | 0.407408 | 0.507899 | 365.3662 | 616.9331 | 383.348  | 508.925  | 504.8301 | 522.5893 |
| 20718 | VKORC1L1  | 272.2105 | 0.169837 | 0.185406 | 0.916025 | 0.359654 | 0.461502 | 253.6964 | 289.5808 | 224.7212 | 314.7299 | 263.1106 | 287.4241 |
| 22212 | LOC10323  | 130.9522 | 0.169654 | 0.245702 | 0.690484 | 0.48989  | 0.586337 | 108.9594 | 146.159  | 115.4914 | 129.4634 | 136.9031 | 148.737  |
| 19093 | FAM43A    | 820.5848 | 0.169538 | 0.144769 | 1.171093 | 0.241561 | 0.336349 | 667.3083 | 895.5657 | 756.9557 | 828.1191 | 844.9487 | 930.611  |
| 19193 | CCDC91    | 1385.437 | 0.169512 | 0.146774 | 1.154919 | 0.248123 | 0.343686 | 1116.698 | 1606.654 | 1188.309 | 1493.293 | 1452.456 | 1455.21  |
| 19037 | URM1      | 999.6155 | 0.169235 | 0.143593 | 1.178573 | 0.238568 | 0.333169 | 1046.227 | 817.2858 | 964.9794 | 991.0644 | 971.1562 | 1206.98  |
| 19787 | LRRC3B    |          |          |          |          |          |          |          |          |          |          |          |          |



|       |           |          |          |          |          |          |          |          |          |          |          |          |          |
|-------|-----------|----------|----------|----------|----------|----------|----------|----------|----------|----------|----------|----------|----------|
| 17136 | CD151     | 9126.969 | 0.168958 | 0.114578 | 1.474608 | 0.140318 | 0.217691 | 9390.02  | 7466.697 | 8928.321 | 9520.022 | 8894.422 | 10562.33 |
| 20100 | LOC103222 | 285.7026 | 0.168806 | 0.166706 | 1.0126   | 0.311251 | 0.411672 | 274.8378 | 280.8223 | 251.8548 | 292.4086 | 303.7537 | 310.5387 |
| 24624 | ARHGEF33  | 26.70031 | 0.168785 | 0.541191 | 0.311876 | 0.755134 | 0.815272 | 21.68345 | 24.63353 | 27.82925 | 33.4819  | 38.50399 | 14.06971 |
| 20444 | ZNF483    | 392.2811 | 0.168583 | 0.176445 | 0.95544  | 0.339355 | 0.441291 | 313.3259 | 419.3174 | 375.6949 | 363.8367 | 468.4652 | 413.0466 |
| 19777 | GFOD2     | 596.4651 | 0.168493 | 0.15946  | 1.056646 | 0.290673 | 0.390734 | 638.5777 | 463.1104 | 585.8058 | 620.5313 | 590.3945 | 680.3711 |
| 21636 | LOC119622 | 187.0938 | 0.16847  | 0.214824 | 0.784223 | 0.432909 | 0.531932 | 172.9256 | 160.3917 | 192.7176 | 223.2127 | 207.4937 | 165.8216 |
| 18051 | BRF1      | 1353.609 | 0.168315 | 0.126149 | 1.334252 | 0.182121 | 0.268223 | 1360.627 | 1165.44  | 1317.715 | 1433.026 | 1274.91  | 1599.927 |
| 25583 | LOC103222 | 5.953748 | 0.168136 | 1.092285 | 0.153931 | 0.877664 | 0.912014 | 2.710432 | 7.663765 | 6.261582 | 2.232127 | 12.83466 | 4.019918 |
| 22712 | PIFO      | 105.2617 | 0.167796 | 0.276405 | 0.607067 | 0.543806 | 0.63654  | 89.98634 | 105.6505 | 99.48959 | 120.5349 | 130.4858 | 85.42325 |
| 16625 | DGCR2     | 3560.65  | 0.167657 | 0.107913 | 1.553631 | 0.120272 | 0.192327 | 3489.41  | 3177.726 | 3402.126 | 3714.259 | 3392.63  | 4187.749 |
| 18837 | CCDC12    | 851.3543 | 0.167555 | 0.138127 | 1.213045 | 0.225113 | 0.317706 | 748.6213 | 933.3371 | 722.8649 | 895.0829 | 919.8176 | 888.4019 |
| 26093 | LOC119622 | 1.307226 | 0.167539 | 2.329306 | 0.071926 | 0.942661 | 0.960435 | 1.626259 | 0.547412 | 1.391463 | 0        | 4.278221 | 0        |
| 19626 | ZNF551    | 488.9108 | 0.167506 | 0.154879 | 1.081526 | 0.279463 | 0.378556 | 453.1842 | 518.9464 | 411.873  | 502.2286 | 483.439  | 563.7935 |
| 24906 | NKX2-2    | 19.02435 | 0.167345 | 0.635117 | 0.263488 | 0.792175 | 0.845578 | 13.55216 | 19.70683 | 19.48048 | 24.5534  | 27.80844 | 9.044815 |
| 24515 | LOC119618 | 30.39556 | 0.167338 | 0.509493 | 0.328441 | 0.742579 | 0.80526  | 34.15144 | 18.612   | 34.09084 | 20.08914 | 34.22577 | 41.20416 |
| 18125 | BRWD3     | 1410.748 | 0.167332 | 0.127077 | 1.316782 | 0.187912 | 0.275621 | 1258.725 | 1533.848 | 1195.962 | 1421.865 | 1497.377 | 1556.713 |
| 16932 | STAG2     | 7983.809 | 0.167313 | 0.111398 | 1.501941 | 0.133112 | 0.209    | 6886.665 | 8708.227 | 6970.533 | 8220.924 | 8417.4   | 8699.102 |
| 17423 | ARHGEF9   | 1463.213 | 0.167176 | 0.117276 | 1.425486 | 0.154017 | 0.235008 | 1266.314 | 1551.365 | 1317.715 | 1571.417 | 1518.769 | 1553.698 |
| 24751 | LOC103222 | 22.91088 | 0.167158 | 0.578466 | 0.288968 | 0.772606 | 0.82975  | 26.02015 | 18.612   | 19.48048 | 15.62489 | 40.6431  | 17.08465 |
| 24285 | LOC103215 | 29.46148 | 0.16707  | 0.458697 | 0.364229 | 0.715687 | 0.783405 | 27.6464  | 29.01283 | 26.43779 | 35.71403 | 27.80844 | 30.14938 |
| 22483 | PIH1D2    | 106.2401 | 0.166698 | 0.260311 | 0.641463 | 0.521222 | 0.616319 | 93.78094 | 95.79707 | 112.0128 | 113.8385 | 98.39909 | 123.6125 |
| 18144 | GARNL3    | 622.037  | 0.166688 | 0.127049 | 1.313511 | 0.189011 | 0.276943 | 587.0795 | 595.0366 | 578.1528 | 611.6028 | 675.959  | 684.391  |
| 19699 | RECK      | 443.7469 | 0.166859 | 0.155943 | 1.069999 | 0.28462  | 0.384112 | 443.4267 | 422.6019 | 392.3925 | 433.0326 | 436.3786 | 534.6491 |
| 16978 | RPUSD3    | 1316.382 | 0.166806 | 0.111492 | 1.496122 | 0.134622 | 0.210785 | 1244.63  | 1232.771 | 1247.446 | 1439.722 | 1251.38  | 1482.345 |
| 18318 | REST      | 3006.862 | 0.16679  | 0.130336 | 1.279701 | 0.20065  | 0.291205 | 2570.031 | 3413.66  | 2517.156 | 3093.728 | 3140.214 | 3306.382 |
| 24759 | ADAMTS18  | 23.26927 | 0.16665  | 0.577383 | 0.288631 | 0.772864 | 0.829863 | 25.47806 | 19.15941 | 20.17621 | 20.08914 | 40.6431  | 14.06971 |
| 25372 | LOC119622 | 8.099918 | 0.166523 | 0.89511  | 0.186037 | 0.852416 | 0.893169 | 6.505036 | 5.474118 | 11.1317  | 11.16063 | 4.278221 | 10.04979 |
| 16769 | ANTXR2    | 2445.173 | 0.166454 | 0.108773 | 1.530292 | 0.125944 | 0.199665 | 2154.793 | 2570.646 | 2189.467 | 2575.875 | 2489.925 | 2690.33  |
| 14596 | ANO10     | 4269.206 | 0.166205 | 0.087151 | 1.907093 | 0.056509 | 0.102924 | 4154.008 | 4038.257 | 3881.485 | 4462.022 | 4402.29  | 4677.174 |
| 20709 | ANKRD6    | 370.1301 | 0.16619  | 0.18094  | 0.918482 | 0.358367 | 0.46005  | 306.8209 | 408.9166 | 333.9511 | 352.6761 | 372.2053 | 446.2109 |
| 23356 | LOC103214 | 65.03923 | 0.166134 | 0.328787 | 0.505294 | 0.613352 | 0.698149 | 59.08741 | 67.33165 | 57.04997 | 84.82083 | 55.61688 | 66.32864 |
| 23087 | LOC119622 | 78.94078 | 0.166097 | 0.302723 | 0.548677 | 0.583227 | 0.671594 | 84.56547 | 60.2153  | 78.61764 | 78.12444 | 87.70354 | 84.41828 |
| 21898 | UBALD1    | 186.5033 | 0.165953 | 0.222889 | 0.744558 | 0.456539 | 0.554256 | 157.7471 | 211.301  | 160.0182 | 176.338  | 192.52   | 221.0955 |
| 18417 | TTC39C    | 639.2767 | 0.165907 | 0.131474 | 1.261897 | 0.206986 | 0.298785 | 617.4364 | 552.8859 | 639.3771 | 676.3345 | 648.1505 | 701.4757 |
| 22766 | LOC119623 | 100.5264 | 0.165854 | 0.276889 | 0.598991 | 0.549179 | 0.641304 | 105.1648 | 77.18507 | 102.9682 | 107.1421 | 94.12087 | 116.5776 |
| 15988 | TSPAN5    | 3237.452 | 0.165816 | 0.099406 | 1.668062 | 0.095303 | 0.158471 | 3077.966 | 3099.446 | 2984.688 | 3281.227 | 3225.779 | 3755.608 |
| 19287 | LOC119618 | 499.0995 | 0.165745 | 0.145693 | 1.137631 | 0.255275 | 0.351868 | 440.1741 | 520.0412 | 449.4425 | 517.8535 | 562.5861 | 504.4997 |
| 20957 | LOC119624 | 213.705  | 0.165697 | 0.18738  | 0.884284 | 0.376543 | 0.477664 | 197.8615 | 215.1328 | 190.6304 | 223.2127 | 235.3022 | 220.0905 |
| 14958 | PSMC2     | 4969.015 | 0.165653 | 0.089845 | 1.843759 | 0.065218 | 0.115913 | 4813.727 | 4501.367 | 4740.714 | 5354.873 | 4941.346 | 5462.063 |
| 20426 | EEA1      | 4686.403 | 0.165437 | 0.172733 | 0.95776  | 0.338184 | 0.44015  | 3605.416 | 6041.784 | 3606.671 | 4774.52  | 5044.023 | 5046.002 |
| 21578 | WDR97     | 310.7847 | 0.16533  | 0.208717 | 0.792124 | 0.428288 | 0.527669 | 329.5885 | 213.4906 | 336.734  | 337.0512 | 310.171  | 337.6731 |
| 18922 | MACO1     | 1476.31  | 0.165158 | 0.137686 | 1.199527 | 0.230323 | 0.323564 | 1245.714 | 1670.153 | 1261.361 | 1535.703 | 1503.795 | 1641.131 |
| 23236 | POLR2L    | 4212.199 | 0.165105 | 0.315431 | 0.523427 | 0.600677 | 0.687252 | 4554.61  | 2421.202 | 4938.997 | 4667.378 | 4077.145 | 4613.861 |
| 19569 | IRF5      | 647.7701 | 0.165093 | 0.151618 | 1.088879 | 0.276207 | 0.375235 | 660.8033 | 547.9592 | 627.5497 | 698.6557 | 581.8381 | 769.8143 |
| 23473 | LOC119615 | 82.68734 | 0.165058 | 0.337865 | 0.488533 | 0.625172 | 0.708026 | 85.64965 | 58.02565 | 92.53227 | 75.89232 | 68.45154 | 115.5726 |
| 17547 | RAB18     | 5001.306 | 0.164795 | 0.116961 | 1.408969 | 0.158844 | 0.240661 | 4294.408 | 5525.027 | 4327.449 | 5191.927 | 5429.063 | 5239.963 |
| 14956 | PXN       | 7830.455 | 0.164623 | 0.089269 | 1.844128 | 0.065165 | 0.115833 | 7352.86  | 7506.111 | 7300.309 | 8180.745 | 7760.693 | 8882.009 |
| 15839 | TXNDC9    | 1973.655 | 0.164539 | 0.097219 | 1.692453 | 0.09056  | 0.151982 | 1868.03  | 1824.524 | 1887.519 | 2075.878 | 2201.145 | 1984.834 |
| 17553 | CEP350    | 6060.267 | 0.164495 | 0.116948 | 1.406567 | 0.159556 | 0.241656 | 5392.675 | 6613.83  | 5142.151 | 6292.366 | 6051.544 | 6869.035 |
| 16795 | ALG2      | 1646.16  | 0.164302 | 0.107609 | 1.526841 | 0.126801 | 0.200714 | 1670.71  | 1444.62  | 1545.219 | 1678.559 | 1719.845 | 1818.008 |
| 23059 | LOC103222 | 110.7935 | 0.164217 | 0.297316 | 0.552333 | 0.58072  | 0.669504 | 76.97626 | 140.6848 | 95.3152  | 118.3027 | 121.9293 | 111.5527 |
| 21668 | ZSCAN22   | 281.3143 | 0.164199 | 0.21028  | 0.78086  | 0.434885 | 0.533529 | 237.9759 | 316.9514 | 244.2017 | 292.4086 | 239.5804 | 356.7677 |
| 24724 | LOC103233 | 21.81658 | 0.164078 | 0.55601  | 0.295099 | 0.767918 | 0.82572  | 20.0572  | 18.06459 | 22.95914 | 33.4819  | 19.252   | 17.08465 |
| 18156 | ETFDH     | 1071.646 | 0.164026 | 0.125078 | 1.311393 | 0.189725 | 0.277805 | 992.5601 | 1113.983 | 926.0185 | 1203.116 | 1037.469 | 1156.731 |
| 17544 | PP1F      | 2027.797 | 0.163745 | 0.116208 | 1.409069 | 0.158815 | 0.240643 | 2074.022 | 1688.765 | 1979.356 | 2140.61  | 2010.764 | 2273.264 |
| 26101 | LOC103222 | 1.309091 | 0.163737 | 2.329014 | 0.070303 | 0.943952 | 0.961456 | 0.542086 | 1.642235 | 1.391463 | 0        | 4.278221 | 0        |
| 16833 | CTS2      | 4438.486 | 0.163491 | 0.107621 | 1.519127 | 0.128731 | 0.203309 | 3937.715 | 4716.5   | 3910.706 | 4564.7   | 4547.749 | 4953.544 |
| 19469 | GDF7      | 394.7796 | 0.16346  | 0.147886 | 1.105312 | 0.269025 | 0.367335 | 378.9184 | 354.7229 | 385.4352 | 397.3186 | 417.1266 | 435.1561 |
| 19540 | DOK1      | 885.7451 | 0.163359 | 0.149582 | 1.092099 | 0.27479  | 0.373863 | 887.9375 | 739.0059 | 885.666  | 921.8684 | 793.6101 | 1086.383 |
| 18520 | ZNF658    | 746.8956 | 0.163287 | 0.130852 | 1.247879 | 0.212076 | 0.304429 | 698.2072 | 767.4714 | 649.8131 | 727.6734 | 817.1403 | 821.0682 |
| 15681 | CWC15     | 2723.064 | 0.16318  | 0.094844 | 1.720502 | 0.085341 | 0.144684 | 2486.55  | 2607.322 | 2608.993 | 2910.694 | 3020.424 | 2704.4   |
| 16823 | MSANTD3   | 2844.153 | 0.163092 | 0.107232 | 1.520928 | 0.128278 | 0.202715 | 2524.496 | 3006.933 | 2517.852 | 2959.8   | 3093.154 | 2962.679 |
| 17560 | FAM98C    | 1113.045 | 0.16308  | 0.116016 | 1.405663 | 0.159824 | 0.241966 | 1029.964 | 1116.173 | 1008.81  | 1118.296 | 1133.729 | 1271.299 |
| 24571 | LOC119622 | 24.7299  | 0.163056 | 0.508348 | 0.320757 | 0.748394 | 0.809752 | 25.47806 | 25.18094 | 18.78475 | 29.01765 | 27.80844 | 22.10955 |
| 16200 | MRPL34    | 1406.397 | 0.163036 | 0.100213 | 1.626897 | 0.103759 | 0.170274 | 1302.091 | 1336.78  | 1342.066 | 1533.471 | 1439.621 | 1484.355 |
| 21032 | JHY       | 651.4357 | 0.162928 | 0.186092 | 0.875526 | 0.381288 | 0.481958 | 499.8036 | 810.1695 | 533.626  | 691.9594 | 686.6545 | 686.401  |
| 17635 | SHOC2     | 2619.395 | 0.162732 | 0.116181 | 1.400675 | 0.161311 | 0.243179 | 2225.807 | 2844.352 | 2344.615 | 2774.534 | 2774.427 | 2752.639 |
| 16387 | GIGYF1    | 3323.464 | 0.162709 | 0.102297 | 1.590557 | 0.111709 | 0.181228 | 3172.832 | 2926.464 | 3315.856 | 3437.476 | 3296.37  | 3791.788 |
| 17822 | EZH1      | 1617.222 | 0.162671 | 0.118441 | 1.373432 | 0.169618 | 0.253018 | 1458.212 | 1688.218 | 1436.685 | 1600.435 | 1653.533 | 1866.247 |
| 18453 | RBM6      | 2949.112 | 0.162664 | 0.129464 | 1.256448 | 0.208954 | 0.301037 | 2658.934 | 3316.    |          |          |          |          |



|       |           |          |          |          |          |            |          |          |          |          |          |          |          |
|-------|-----------|----------|----------|----------|----------|------------|----------|----------|----------|----------|----------|----------|----------|
| 23224 | HEXIM2    | 91.58726 | 0.162135 | 0.308184 | 0.526099 | 0.59882    | 0.685481 | 95.94929 | 71.16354 | 93.92374 | 66.96381 | 106.9555 | 114.5677 |
| 16867 | RPS6KA6   | 1610.846 | 0.162119 | 0.107233 | 1.511842 | 0.130574   | 0.205805 | 1452.791 | 1657.563 | 1449.208 | 1741.059 | 1694.176 | 1670.276 |
| 18863 | SIRT1     | 1256.223 | 0.1621   | 0.133938 | 1.210265 | 0.226177   | 0.318768 | 1108.567 | 1394.258 | 1054.033 | 1366.062 | 1272.771 | 1341.648 |
| 19617 | GCH1      | 586.1686 | 0.162074 | 0.149603 | 1.083363 | 0.278647   | 0.377623 | 594.6687 | 484.4595 | 580.24   | 564.7281 | 690.9327 | 601.9827 |
| 20867 | CNOT4     | 1187.818 | 0.162044 | 0.180873 | 0.895899 | 0.370307   | 0.471801 | 912.8734 | 1503.193 | 946.8904 | 1178.563 | 1341.222 | 1244.165 |
| 16911 | AQR       | 7667.468 | 0.162015 | 0.107693 | 1.504417 | 0.132474   | 0.208232 | 6739.76  | 8204.061 | 6771.553 | 8026.729 | 7692.242 | 8570.465 |
| 18086 | PIAS4     | 1170.4   | 0.161849 | 0.122168 | 1.324808 | 0.185235   | 0.272281 | 1060.863 | 1155.586 | 1103.43  | 1234.366 | 1097.364 | 1070.792 |
| 16655 | ZNF592    | 1562.267 | 0.161836 | 0.104606 | 1.547099 | 0.121839   | 0.194471 | 1451.707 | 1523.447 | 1454.079 | 1598.203 | 1574.385 | 1771.779 |
| 19136 | TUBGCP6   | 1843.16  | 0.161797 | 0.139071 | 1.163413 | 0.244662   | 0.339901 | 1892.966 | 1494.434 | 1838.818 | 1868.29  | 1711.289 | 2253.164 |
| 21820 | ZSCAN23   | 198.4457 | 0.161701 | 0.213544 | 0.757228 | 0.448913   | 0.546946 | 209.2453 | 162.0339 | 192.7176 | 176.338  | 218.1893 | 232.1503 |
| 20376 | LOC119627 | 285.2613 | 0.161605 | 0.167386 | 0.965464 | 0.334312   | 0.436184 | 281.3428 | 272.6111 | 253.2462 | 290.1765 | 318.7275 | 295.464  |
| 21081 | HOOK2     | 258.9991 | 0.161577 | 0.186096 | 0.868246 | 0.38526    | 0.485846 | 246.1072 | 219.5121 | 269.9438 | 281.248  | 241.7195 | 295.464  |
| 22849 | LOC103231 | 129.7443 | 0.16116  | 0.27536  | 0.585269 | 0.558367   | 0.649629 | 107.3331 | 150.5382 | 108.5341 | 176.338  | 109.0946 | 126.6274 |
| 24459 | LOC103247 | 34.79055 | 0.161129 | 0.478365 | 0.336831 | 0.736244   | 0.800255 | 48.78777 | 22.9913  | 26.43779 | 35.71403 | 40.6431  | 34.1693  |
| 25543 | LOC119627 | 7.745895 | 0.160949 | 1.014775 | 0.158606 | 0.873979   | 0.909597 | 2.168345 | 8.211177 | 11.1317  | 13.39276 | 8.556443 | 3.014938 |
| 16263 | DOCK9     | 3637.826 | 0.160871 | 0.099625 | 1.614764 | 0.106362   | 0.173869 | 3455.801 | 3560.366 | 3296.375 | 3647.295 | 3664.297 | 4202.824 |
| 17388 | KCTD5     | 1103.305 | 0.160812 | 0.112381 | 1.43095  | 0.152445   | 0.233077 | 1068.452 | 1068     | 992.8087 | 1107.135 | 1142.285 | 1241.15  |
| 22471 | AKAP5     | 120.0295 | 0.16072  | 0.24923  | 0.644868 | 0.519013   | 0.614034 | 100.286  | 124.2625 | 114.0999 | 140.624  | 128.3466 | 112.5577 |
| 17259 | LDLR      | 8543.699 | 0.160701 | 0.110301 | 1.45693  | 0.145136   | 0.22356  | 8573.096 | 7400.46  | 8239.547 | 8707.527 | 8184.237 | 10157.33 |
| 21101 | ZNF155    | 242.3979 | 0.160649 | 0.185723 | 0.864996 | 0.387041   | 0.48763  | 226.05   | 254.5465 | 205.9365 | 267.8552 | 241.7195 | 258.2797 |
| 19188 | ALG6      | 530.8224 | 0.160597 | 0.138901 | 1.156197 | 0.247601   | 0.343051 | 538.8339 | 492.1232 | 475.1845 | 551.3354 | 530.4994 | 596.9578 |
| 21290 | ZNF684    | 249.9422 | 0.160521 | 0.192078 | 0.835707 | 0.40332    | 0.503626 | 255.3227 | 203.0898 | 248.3761 | 254.4625 | 295.1973 | 243.205  |
| 17677 | C2CD2L    | 1082.219 | 0.160502 | 0.115503 | 1.389599 | 0.164651   | 0.24761  | 970.8767 | 1106.867 | 990.0257 | 1087.046 | 1163.676 | 1174.821 |
| 21115 | CUNH16or  | 402.1222 | 0.160343 | 0.185805 | 0.862966 | 0.388156   | 0.488711 | 330.6727 | 475.7009 | 331.8639 | 444.1933 | 419.2657 | 411.0366 |
| 25198 | LOC103234 | 12.96481 | 0.160338 | 0.746089 | 0.214904 | 0.829842   | 0.87552  | 10.29964 | 15.32753 | 10.43597 | 11.16063 | 23.53022 | 7.034856 |
| 20565 | PAF1      | 2672.914 | 0.160319 | 0.170008 | 0.943006 | 0.345678   | 0.447515 | 2003.009 | 3381.91  | 2187.379 | 2921.854 | 2810.791 | 2732.539 |
| 23288 | LOC103231 | 78.14246 | 0.1603   | 0.310998 | 0.515437 | 0.606248   | 0.692078 | 71.01331 | 65.14201 | 86.96642 | 66.96381 | 81.28621 | 97.48301 |
| 19242 | ACSF3     | 1056.977 | 0.160118 | 0.139756 | 1.145698 | 0.25192    | 0.348048 | 1074.957 | 846.2987 | 1078.384 | 1073.653 | 1037.469 | 1231.1   |
| 25256 | TRNAQ-UL  | 10.3797  | 0.16005  | 0.775333 | 0.206427 | 0.836457   | 0.880472 | 10.84173 | 6.568942 | 11.82743 | 11.16063 | 12.83466 | 9.044815 |
| 17261 | NDUFA6    | 1335.401 | 0.159967 | 0.109812 | 1.456728 | 0.145192   | 0.223614 | 1190.422 | 1240.435 | 1351.11  | 1464.275 | 1422.509 | 1343.658 |
| 17944 | ASB6      | 1298.651 | 0.159962 | 0.118298 | 1.352196 | 0.176313   | 0.261217 | 1286.913 | 1163.25  | 1236.315 | 1285.705 | 1294.162 | 1525.559 |
| 22892 | LOC119615 | 88.87061 | 0.159919 | 0.275452 | 0.580569 | 0.561531   | 0.652119 | 79.6867  | 87.03848 | 84.1835  | 104.91   | 91.98176 | 85.42325 |
| 19517 | ZNF182    | 759.5395 | 0.159849 | 0.145493 | 1.098669 | 0.271912   | 0.370384 | 648.3353 | 834.2556 | 669.9893 | 736.6019 | 862.0616 | 805.9935 |
| 17896 | ASF1B     | 1321.118 | 0.15973  | 0.117272 | 1.362044 | 0.173184   | 0.25727  | 1272.277 | 1264.521 | 1213.356 | 1366.062 | 1257.797 | 1552.693 |
| 17397 | SELENON   | 5164.127 | 0.159675 | 0.111675 | 1.429827 | 0.152767   | 0.233448 | 4505.822 | 5456.054 | 4679.489 | 5314.694 | 5061.136 | 5967.568 |
| 18360 | JCAD      | 1359.836 | 0.159649 | 0.125512 | 1.271981 | 0.20338    | 0.294491 | 1273.361 | 1392.616 | 1193.875 | 1303.562 | 1377.587 | 1618.017 |
| 17241 | DOP1B     | 1766.549 | 0.159469 | 0.10921  | 1.460208 | 0.144233   | 0.222402 | 1721.124 | 1630.192 | 1662.102 | 1821.416 | 1711.289 | 2053.173 |
| 25141 | TRNAK-UU  | 13.47506 | 0.159364 | 0.710906 | 0.22417  | 0.822625   | 0.869874 | 14.63633 | 7.116354 | 16.69755 | 15.62489 | 10.69555 | 16.07967 |
| 22358 | TMEM182   | 131.6936 | 0.159223 | 0.239189 | 0.665678 | 0.505617   | 0.601209 | 121.9694 | 112.2194 | 139.1463 | 124.9991 | 156.1551 | 135.6722 |
| 24057 | AKAP14    | 40.64485 | 0.159179 | 0.40133  | 0.39663  | 0.691641   | 0.764321 | 34.69353 | 42.69812 | 37.56949 | 51.33892 | 36.36488 | 41.20416 |
| 17306 | RILPL2    | 1017.551 | 0.159063 | 0.109863 | 1.447821 | 0.147667   | 0.226842 | 964.9137 | 971.1086 | 949.6733 | 1109.367 | 1011.799 | 1098.443 |
| 23335 | LOC103216 | 101.182  | 0.159025 | 0.312591 | 0.508733 | 0.610939   | 0.696028 | 114.9223 | 69.5213  | 100.881  | 100.4457 | 136.9031 | 84.41828 |
| 13858 | LOC103218 | 14617.19 | 0.1589   | 0.077978 | 2.037768 | 0.041573   | 0.079753 | 13969.02 | 13454.29 | 14014.81 | 15796.76 | 15168.43 | 15299.81 |
| 19108 | LYSMD1    | 550.5774 | 0.158537 | 0.135778 | 1.167617 | 0.242961   | 0.338033 | 507.9349 | 541.3903 | 508.5796 | 629.4598 | 575.4208 | 540.679  |
| 24032 | BMP6      | 43.20811 | 0.15851  | 0.394388 | 0.401915 | 0.687747   | 0.760809 | 42.82482 | 45.43518 | 33.39511 | 51.33892 | 47.06043 | 39.1942  |
| 19283 | ELAC1     | 502.8472 | 0.158384 | 0.139084 | 1.138771 | 0.254799   | 0.351285 | 479.7464 | 459.8259 | 484.9248 | 502.2286 | 581.8381 | 508.5196 |
| 25241 | LOC119627 | 10.40652 | 0.158179 | 0.757973 | 0.208686 | 0.834693   | 0.879138 | 9.757555 | 10.94824 | 9.044508 | 8.928508 | 10.69555 | 13.06473 |
| 17643 | SLX4      | 858.8487 | 0.158109 | 0.113031 | 1.398808 | 0.16187    | 0.243911 | 835.8972 | 810.1695 | 788.2636 | 912.9399 | 913.4003 | 892.4218 |
| 21313 | FLYWCH1   | 875.5202 | 0.157904 | 0.190001 | 0.831073 | 0.405932   | 0.506344 | 1025.085 | 584.0884 | 875.2301 | 970.9752 | 812.8621 | 984.8799 |
| 19208 | POLR3D    | 810.9813 | 0.157766 | 0.136965 | 1.151867 | 0.249376   | 0.34515  | 727.4799 | 878.0485 | 692.9484 | 832.5834 | 902.7047 | 832.1293 |
| 24278 | LOC119627 | 39.22619 | 0.157607 | 0.431686 | 0.365097 | 0.715039   | 0.782985 | 46.07734 | 33.39212 | 30.61218 | 51.33892 | 42.78221 | 31.15436 |
| 25619 | LOC119627 | 6.022539 | 0.157588 | 1.066404 | 0.147775 | 0.88252    | 0.915797 | 7.047123 | 6.02153  | 3.478657 | 11.16063 | 6.417332 | 2.009959 |
| 20026 | HGD       | 584.5295 | 0.157567 | 0.153996 | 1.023187 | 0.306219   | 0.406514 | 615.268  | 462.0156 | 582.3272 | 620.5313 | 581.8381 | 645.1968 |
| 18687 | STON1     | 956.9623 | 0.157486 | 0.127952 | 1.230821 | 0.21839    | 0.310692 | 874.3853 | 984.7939 | 859.924  | 928.5648 | 977.5736 | 1116.532 |
| 23497 | LOC119627 | 63.15319 | 0.157374 | 0.324359 | 0.485184 | 0.627546   | 0.710018 | 64.50828 | 52.00412 | 62.61582 | 71.42806 | 62.03421 | 66.32864 |
| 17249 | THTPA     | 1990.032 | 0.157307 | 0.1079   | 1.457893 | 0.14487    | 0.223281 | 1742.808 | 2035.277 | 1866.647 | 1742.502 | 1976.538 | 2102.417 |
| 24004 | LOC103234 | 46.91626 | 0.15721  | 0.386936 | 0.406295 | 0.684526   | 0.758181 | 40.65648 | 43.79295 | 47.30973 | 55.80317 | 57.75599 | 36.17926 |
| 22383 | GTPBP3    | 155.2931 | 0.156896 | 0.237402 | 0.660889 | 0.508683   | 0.60418  | 172.9256 | 119.8832 | 146.7993 | 160.7131 | 179.6853 | 151.7519 |
| 25232 | LOC119621 | 12.47215 | 0.156867 | 0.746667 | 0.21009  | 0.833598   | 0.878297 | 16.26259 | 6.568942 | 12.52316 | 17.85702 | 8.556443 | 13.06473 |
| 17357 | BTBD9     | 1670.155 | 0.156732 | 0.108981 | 1.438153 | 0.150391   | 0.230347 | 1662.579 | 1488.96  | 1591.833 | 1747.755 | 1636.42  | 1893.381 |
| 19281 | ZNF234    | 813.4988 | 0.156665 | 0.137527 | 1.139158 | 0.254637   | 0.351103 | 776.8098 | 865.4581 | 664.4235 | 892.8508 | 834.2532 | 847.1977 |
| 24598 | LOC103247 | 30.80682 | 0.156635 | 0.494587 | 0.316699 | 0.751472   | 0.812175 | 28.18849 | 27.918   | 29.91645 | 37.94616 | 42.78221 | 18.08963 |
| 23762 | TMEM240   | 67.56466 | 0.156626 | 0.353141 | 0.443521 | 0.657389   | 0.735509 | 58.54533 | 47.07742 | 86.96642 | 66.96381 | 68.45154 | 77.38342 |
| 25056 | LOC119627 | 15.19761 | 0.156462 | 0.6602   | 0.236991 | 0.812664   | 0.862255 | 15.17842 | 12.04306 | 16.00182 | 22.32127 | 8.556443 | 17.08465 |
| 17996 | TCTN1     | 2176.429 | 0.156437 | 0.116432 | 1.343588 | 0.179082   | 0.264538 | 1955.848 | 2352.229 | 1867.343 | 2332.573 | 2231.092 | 2319.493 |
| 25202 | LOC103231 | 13.66904 | 0.156311 | 0.728586 | 0.214541 | 0.830125   | 0.875679 | 20.0572  | 9.306001 | 9.044508 | 11.16063 | 21.39111 | 11.05477 |
| 18868 | EPS15L1   | 1059.908 | 0.156216 | 0.129197 | 1.209133 | 0.226612   | 0.319296 | 896.0688 | 1106.319 | 1007.419 | 1013.386 | 1176.511 | 1159.746 |
| 22521 | HERC6     | 125.6563 | 0.156178 | 0.245125 | 0.637133 | 0.524038   | 0.618603 | 117.0907 | 102.366  | 137.0591 | 136.1597 | 132.6249 | 128.6374 |
| 16892 | RGS10     | 1176.259 | 0.156151 | 0.103545 | 1.508042 | 0.131544   | 0.207027 | 1127.54  | 1086.612 | 1124.998 | 1236.598 | 1223.571 | 1258.234 |
| 17355 | P4HA1     | 2680.598 | 0.156094 | 0.108508 | 1.438553 | 0.150277</ |          |          |          |          |          |          |          |



|       |           |          |          |          |          |          |          |          |          |          |          |          |          |
|-------|-----------|----------|----------|----------|----------|----------|----------|----------|----------|----------|----------|----------|----------|
| 16950 | LOC103221 | 8155.332 | 0.155743 | 0.103857 | 1.499594 | 0.13372  | 0.209731 | 7336.597 | 8663.887 | 7149.336 | 8296.816 | 8434.513 | 9050.845 |
| 19129 | PEA15     | 5306.794 | 0.155686 | 0.133707 | 1.164385 | 0.244268 | 0.339477 | 4456.492 | 6175.353 | 4430.417 | 5696.388 | 5379.863 | 5702.254 |
| 23972 | LOC119621 | 57.19545 | 0.155574 | 0.378371 | 0.411167 | 0.68095  | 0.755175 | 40.11439 | 64.59459 | 56.35424 | 78.12444 | 57.75599 | 46.22906 |
| 17558 | ATG13     | 2363.999 | 0.155527 | 0.110618 | 1.40599  | 0.159727 | 0.241847 | 2272.968 | 2230.703 | 2211.73  | 2573.642 | 2175.476 | 2719.474 |
| 25824 | LOC119621 | 3.66666  | 0.155479 | 1.334636 | 0.116495 | 0.90726  | 0.933996 | 3.794605 | 3.284471 | 3.478657 | 0        | 6.417332 | 5.024897 |
| 23566 | LOC103221 | 64.20754 | 0.155446 | 0.327489 | 0.47466  | 0.63503  | 0.716352 | 63.42411 | 55.28859 | 62.61582 | 82.5887  | 62.03421 | 59.29379 |
| 20377 | MPST      | 123.031  | 0.155365 | 0.160942 | 0.965352 | 0.334369 | 0.436236 | 1204.516 | 809.0747 | 1176.482 | 1205.349 | 1084.529 | 1258.234 |
| 25975 | TRNAP-CG  | 2.338277 | 0.155211 | 1.688238 | 0.091936 | 0.926749 | 0.948539 | 2.710432 | 0.547412 | 3.478657 | 0        | 4.278221 | 3.014938 |
| 24548 | NLRP10    | 34.12904 | 0.155165 | 0.47956  | 0.323557 | 0.746274 | 0.8082   | 24.39389 | 46.53    | 25.74206 | 29.01765 | 44.92132 | 34.1693  |
| 17304 | RTCA      | 1578.864 | 0.15512  | 0.107132 | 1.447932 | 0.147636 | 0.226808 | 1586.145 | 1443.525 | 1456.861 | 1622.756 | 1585.081 | 1778.814 |
| 18995 | MOC51     | 694.4731 | 0.155007 | 0.130688 | 1.186083 | 0.23559  | 0.329726 | 712.3015 | 633.9029 | 628.2454 | 687.4951 | 723.0194 | 781.874  |
| 17339 | GLB1L2    | 2456.924 | 0.154813 | 0.107411 | 1.441322 | 0.149494 | 0.229211 | 2430.173 | 2235.082 | 2317.481 | 2502.214 | 2389.387 | 2867.206 |
| 16772 | UNC119    | 1612.319 | 0.154788 | 0.101117 | 1.529975 | 0.126023 | 0.199757 | 1561.751 | 1484.033 | 1531.305 | 1620.524 | 1798.992 | 1677.311 |
| 25529 | LOC103231 | 10.43153 | 0.154697 | 0.962686 | 0.160693 | 0.872335 | 0.908419 | 5.420864 | 13.6853  | 9.740239 | 15.62489 | 17.11289 | 1.004979 |
| 22266 | SMAD6     | 136.4584 | 0.154537 | 0.227443 | 0.679455 | 0.49685  | 0.593198 | 137.1479 | 118.241  | 132.189  | 149.5525 | 136.9031 | 144.717  |
| 16234 | LDAH      | 2342.13  | 0.154434 | 0.095292 | 1.620636 | 0.105096 | 0.172106 | 2172.14  | 2324.858 | 2156.072 | 2366.055 | 2492.064 | 2541.593 |
| 19482 | ZNF510    | 784.2769 | 0.154337 | 0.139861 | 1.103505 | 0.269808 | 0.368178 | 704.7123 | 856.6995 | 664.4235 | 801.3336 | 868.4789 | 810.0135 |
| 21465 | SHANK3    | 235.9763 | 0.154329 | 0.19103  | 0.807875 | 0.419162 | 0.519144 | 201.114  | 213.4906 | 256.7249 | 245.534  | 241.7195 | 257.2747 |
| 19297 | MAIP1     | 729.2848 | 0.154011 | 0.135544 | 1.13624  | 0.255856 | 0.352487 | 729.1062 | 604.3426 | 739.5624 | 732.1376 | 778.6363 | 791.9238 |
| 23776 | LOC103221 | 65.78278 | 0.153984 | 0.349916 | 0.440058 | 0.659895 | 0.737767 | 76.43418 | 60.76271 | 48.00546 | 80.35657 | 74.86887 | 54.26889 |
| 17416 | BEX3      | 4442.57  | 0.153852 | 0.107829 | 1.426807 | 0.153635 | 0.23452  | 3988.129 | 4753.177 | 3873.137 | 4691.931 | 4855.781 | 4493.263 |
| 15371 | PPIB      | 16384.73 | 0.15368  | 0.087055 | 1.765329 | 0.077508 | 0.134055 | 15253.77 | 16579.46 | 14707.76 | 17223.09 | 16747.1  | 17797.18 |
| 17168 | PHF1      | 1753.443 | 0.153502 | 0.104262 | 1.472228 | 0.140948 | 0.218262 | 1672.336 | 1733.106 | 1579.31  | 1823.648 | 1745.514 | 1966.745 |
| 25075 | LOC119621 | 14.79949 | 0.153366 | 0.654673 | 0.234263 | 0.814781 | 0.863867 | 11.38381 | 12.04306 | 18.78475 | 13.39276 | 17.11289 | 16.07967 |
| 16368 | TAOK2     | 3326.458 | 0.15333  | 0.096172 | 1.594336 | 0.110861 | 0.180069 | 3242.219 | 3098.351 | 3115.485 | 3415.154 | 3302.787 | 3784.753 |
| 25884 | LOC119611 | 3.999804 | 0.153174 | 1.442185 | 0.10621  | 0.915416 | 0.940191 | 1.626259 | 6.568942 | 2.782925 | 4.464254 | 8.556443 | 0        |
| 25458 | LOC103211 | 8.093387 | 0.153166 | 0.897875 | 0.170587 | 0.864548 | 0.902834 | 8.673382 | 9.306001 | 4.87012  | 13.39276 | 4.278221 | 8.039836 |
| 25623 | CACNG4    | 7.034563 | 0.15306  | 1.042917 | 1.46761  | 0.88332  | 0.916484 | 5.420864 | 7.663765 | 6.261582 | 11.16063 | 10.69555 | 1.004979 |
| 20184 | LOC103241 | 577.5471 | 0.153017 | 0.153055 | 0.999748 | 0.317433 | 0.41808  | 615.268  | 483.912  | 545.4534 | 564.7281 | 577.5599 | 678.3611 |
| 22309 | LOC103221 | 254.9793 | 0.152924 | 0.2271   | 0.673377 | 0.500707 | 0.596636 | 300.3158 | 173.5295 | 249.7676 | 283.4801 | 269.5279 | 253.2548 |
| 18830 | ZDHHC1    | 845.1033 | 0.152911 | 0.125947 | 1.214088 | 0.224714 | 0.317261 | 793.0724 | 807.4324 | 805.6569 | 881.6902 | 797.8883 | 984.8799 |
| 24803 | LOC119621 | 21.14141 | 0.152869 | 0.545245 | 0.280367 | 0.779196 | 0.835178 | 17.34676 | 23.53871 | 18.78475 | 24.5534  | 23.53022 | 19.09461 |
| 19451 | TPST2     | 482.0281 | 0.15275  | 0.137618 | 1.109961 | 0.267016 | 0.364949 | 440.1741 | 482.8172 | 446.6595 | 517.8535 | 494.1346 | 510.5296 |
| 17058 | EGLN1     | 4095.229 | 0.152697 | 0.102745 | 1.486175 | 0.137233 | 0.213874 | 3796.773 | 4211.239 | 3632.413 | 4290.148 | 4027.855 | 4612.856 |
| 20497 | ATP8A2    | 322.8809 | 0.152197 | 0.16065  | 0.947382 | 0.343444 | 0.445453 | 292.1846 | 328.9945 | 295.6858 | 334.819  | 352.9533 | 332.6482 |
| 16423 | USP33     | 3966.691 | 0.152128 | 0.09593  | 1.585824 | 0.112779 | 0.182563 | 3783.763 | 4015.813 | 3475.178 | 4044.614 | 4190.518 | 4290.257 |
| 18675 | DNM2      | 1708.954 | 0.151844 | 0.123288 | 1.231618 | 0.218092 | 0.310471 | 1409.967 | 1851.347 | 1596.008 | 1787.934 | 1807.549 | 1800.923 |
| 21783 | LMBR1L    | 444.8829 | 0.151817 | 0.199228 | 0.762024 | 0.446046 | 0.544375 | 495.4669 | 331.1841 | 441.7894 | 450.8897 | 387.179  | 562.7885 |
| 24535 | LOC119621 | 28.91854 | 0.151803 | 0.466887 | 0.325138 | 0.745076 | 0.807331 | 23.30971 | 30.10765 | 28.52499 | 33.4819  | 29.94755 | 28.13943 |
| 17192 | NUMA1     | 15362.3  | 0.151801 | 0.103358 | 1.468687 | 0.141918 | 0.219435 | 14208.63 | 15568.94 | 13894.45 | 15792.3  | 14721.36 | 17988.13 |
| 23463 | HK3       | 92.31106 | 0.151683 | 0.309068 | 0.490775 | 0.623586 | 0.706561 | 75.89209 | 90.87036 | 93.228   | 124.9991 | 100.5382 | 68.3386  |
| 23836 | OLFM2     | 59.84023 | 0.151649 | 0.350767 | 0.432334 | 0.665498 | 0.742225 | 50.95612 | 71.16354 | 47.30973 | 71.42806 | 59.8951  | 58.28881 |
| 19099 | SIAH2     | 1015.397 | 0.151321 | 0.129288 | 1.170416 | 0.241833 | 0.336622 | 911.7893 | 1091.539 | 885.666  | 1035.707 | 1031.051 | 1136.632 |
| 20675 | PROSER2   | 400.4591 | 0.151287 | 0.163508 | 0.925258 | 0.354832 | 0.456261 | 388.6759 | 347.0591 | 403.5242 | 470.9788 | 359.3706 | 433.1462 |
| 20465 | ZBTB3     | 424.3995 | 0.15125  | 0.158958 | 0.951514 | 0.341344 | 0.443422 | 428.7903 | 367.8607 | 413.2644 | 446.4254 | 393.5964 | 496.4599 |
| 18820 | ZNF555    | 627.6713 | 0.151196 | 0.124433 | 1.215079 | 0.224336 | 0.316862 | 592.5004 | 585.1832 | 608.7649 | 640.6204 | 654.5679 | 684.391  |
| 25717 | TLR10     | 5.358305 | 0.151172 | 1.142334 | 0.132336 | 0.894718 | 0.924917 | 3.252518 | 8.758589 | 2.782925 | 8.928508 | 6.417332 | 2.009959 |
| 18872 | GSK3B     | 3829.292 | 0.151141 | 0.12507  | 1.208455 | 0.226872 | 0.319595 | 3367.983 | 4324.553 | 3194.798 | 3997.739 | 3938.103 | 4152.575 |
| 19634 | FGD1      | 729.3389 | 0.151008 | 0.139848 | 1.079797 | 0.280233 | 0.379443 | 632.0727 | 775.1351 | 669.9893 | 741.0662 | 716.6021 | 841.1678 |
| 17694 | ARAB14    | 3835.475 | 0.150839 | 0.108836 | 1.385926 | 0.16577  | 0.249067 | 3337.626 | 4029.498 | 3543.36  | 3881.669 | 3861.095 | 4359.601 |
| 16376 | ABL6IP4   | 2039.742 | 0.15069  | 0.09463  | 1.592423 | 0.11129  | 0.180669 | 1888.629 | 1926.342 | 1988.4   | 2078.11  | 2136.972 | 2220     |
| 18742 | EIF1AD    | 993.2581 | 0.150616 | 0.122883 | 1.225691 | 0.220315 | 0.312511 | 889.0216 | 1046.104 | 890.5362 | 1053.564 | 998.9647 | 1081.358 |
| 20340 | RASSF7    | 690.3405 | 0.150511 | 0.155034 | 0.970822 | 0.331637 | 0.43346  | 709.049  | 533.1791 | 720.7777 | 781.2444 | 680.2372 | 717.5553 |
| 27040 | TRNAV-UA  | 0.722879 | 0.150435 | 2.824184 | 0.053267 | 0.957519 | NA       | 1.084173 | 0.547412 | 0.695731 | 0        | 0        | 2.009959 |
| 25192 | LOC119621 | 14.11285 | 0.1504   | 0.696895 | 0.215814 | 0.829133 | 0.874945 | 18.43094 | 9.306001 | 11.82743 | 20.08914 | 14.97377 | 10.04979 |
| 24021 | EIF5B     | 2013.036 | 0.150282 | 0.372426 | 0.403522 | 0.686564 | 0.759848 | 1282.034 | 2921.537 | 1521.565 | 1966.504 | 2111.302 | 2275.274 |
| 17258 | FEN1      | 2111.844 | 0.150274 | 0.103141 | 1.456972 | 0.145124 | 0.223556 | 1988.373 | 2155.708 | 1863.864 | 2194.181 | 2160.502 | 2308.438 |
| 18302 | ERN1      | 921.7805 | 0.15019  | 0.11719  | 1.28159  | 0.199987 | 0.290495 | 873.8432 | 918.557  | 831.399  | 975.4395 | 913.4003 | 1018.044 |
| 24509 | LOC119621 | 30.55181 | 0.150177 | 0.455248 | 0.329878 | 0.741492 | 0.804289 | 28.18849 | 27.37059 | 31.30791 | 26.78552 | 38.50399 | 31.15436 |
| 16031 | AGBL2     | 3114.637 | 0.150131 | 0.090411 | 1.660537 | 0.096806 | 0.160533 | 3002.074 | 2798.917 | 3058.435 | 3278.995 | 3245.031 | 3304.372 |
| 25753 | LOC103221 | 4.989615 | 0.149889 | 1.179189 | 0.127112 | 0.898852 | 0.927891 | 8.131296 | 4.379295 | 1.391463 | 4.464254 | 8.556443 | 3.014938 |
| 16929 | PBLD      | 2401.895 | 0.149762 | 0.099697 | 1.50217  | 0.133053 | 0.208944 | 2288.147 | 2437.625 | 2105.283 | 2511.143 | 2547.681 | 2521.493 |
| 18128 | KDM5A     | 2426.322 | 0.149705 | 0.113736 | 1.316256 | 0.188088 | 0.275834 | 2216.049 | 2565.172 | 2124.068 | 2531.232 | 2380.83  | 2740.579 |
| 18166 | ELAC2     | 2496.814 | 0.1497   | 0.114324 | 1.309432 | 0.190388 | 0.278623 | 2509.86  | 2256.431 | 2342.528 | 2604.892 | 2331.631 | 2935.545 |
| 17348 | TSC1      | 3160.546 | 0.149656 | 0.103963 | 1.439509 | 0.150006 | 0.229878 | 2944.071 | 3201.264 | 2851.107 | 3180.781 | 3153.049 | 3633.001 |
| 25034 | LOC119621 | 19.05783 | 0.149338 | 0.6218   | 0.240171 | 0.810198 | 0.860394 | 25.47806 | 13.13788 | 15.30609 | 13.39276 | 29.94755 | 17.08465 |
| 18369 | ZNF574    | 928.7917 | 0.149038 | 0.117438 | 1.269072 | 0.204415 | 0.295845 | 854.8702 | 948.1173 | 841.1392 | 944.1897 | 975.4345 | 1008.999 |
| 24968 | TMEM130   | 18.79639 | 0.148965 | 0.591134 | 0.251999 | 0.801042 | 0.852919 | 16.80468 | 21.34906 | 14.61036 | 24.5534  | 21.39111 | 14.06971 |
| 21321 | NECAB3    | 657.2208 | 0.14894  | 0.179488 | 0.829809 | 0.406647 | 0.507045 | 702.0018 | 485.0069 | 685.9911 | 723.2091 | 573.2817 | 773.8342 |
| 24251 | LOC119621 | 46.98731 | 0.1488   | 0.404113 | 0.368213 | 0.712715 | 0.781309 | 47.7036  | 35.58177 | 50.788   |          |          |          |



|       |           |          |          |          |          |          |          |          |          |          |          |          |          |
|-------|-----------|----------|----------|----------|----------|----------|----------|----------|----------|----------|----------|----------|----------|
| 21872 | RIN3      | 308.1539 | 0.148532 | 0.198299 | 0.749031 | 0.453839 | 0.551632 | 300.8579 | 285.749  | 295.6858 | 270.0874 | 284.5017 | 412.0416 |
| 24287 | LOC119621 | 46.89853 | 0.148467 | 0.407574 | 0.364269 | 0.715657 | 0.783405 | 43.909   | 41.05589 | 48.00546 | 33.4819  | 72.72976 | 42.20914 |
| 24743 | LOC103241 | 25.95149 | 0.148458 | 0.510596 | 0.290754 | 0.77124  | 0.828655 | 19.51511 | 25.18094 | 28.52499 | 35.71403 | 25.66933 | 21.10457 |
| 25917 | LOC119621 | 3.65369  | 0.148403 | 1.46437  | 0.101343 | 0.919278 | 0.942972 | 7.047123 | 2.737059 | 0.695731 | 0        | 6.417332 | 5.024897 |
| 21637 | ZNF529    | 220.729  | 0.148306 | 0.189213 | 0.783802 | 0.433156 | 0.532212 | 217.3766 | 218.4173 | 194.1091 | 218.7484 | 222.4675 | 253.2548 |
| 20415 | TAP1      | 945.2419 | 0.148144 | 0.154453 | 0.959157 | 0.33748  | 0.439494 | 1024.543 | 770.7558 | 899.5807 | 988.8323 | 847.0878 | 1140.652 |
| 18294 | CUNH16or  | 1057.381 | 0.148056 | 0.115258 | 1.284562 | 0.198945 | 0.289109 | 998.5231 | 1039.535 | 976.1111 | 1078.117 | 1046.025 | 1205.975 |
| 18214 | USP24     | 6185.575 | 0.147626 | 0.113645 | 1.299011 | 0.19394  | 0.28306  | 5580.779 | 6712.911 | 5318.171 | 6330.312 | 6175.612 | 6995.662 |
| 18799 | VTI1B     | 3086.044 | 0.147616 | 0.121182 | 1.218136 | 0.223172 | 0.31559  | 2715.853 | 3441.578 | 2626.386 | 3207.566 | 3304.926 | 3219.954 |
| 18025 | MTMR9     | 1385.969 | 0.147306 | 0.110054 | 1.338488 | 0.180737 | 0.266569 | 1392.62  | 1347.18  | 1206.398 | 1482.132 | 1401.117 | 1486.365 |
| 18942 | PAK2      | 3558.437 | 0.147212 | 0.123041 | 1.196445 | 0.231523 | 0.324941 | 3029.721 | 3987.348 | 3115.485 | 3752.205 | 3576.593 | 3889.271 |
| 16608 | ATP9B     | 2086.908 | 0.147205 | 0.094591 | 1.556227 | 0.119654 | 0.191542 | 2027.403 | 1937.29  | 1979.356 | 2218.734 | 2098.468 | 2260.199 |
| 17121 | RIC1      | 2701.937 | 0.147187 | 0.099584 | 1.478022 | 0.139402 | 0.216459 | 2588.462 | 2667.538 | 2442.017 | 2758.909 | 2699.558 | 3055.138 |
| 20234 | TYSND1    | 1128.744 | 0.147047 | 0.148536 | 0.989972 | 0.322188 | 0.423306 | 1170.907 | 925.126  | 1124.302 | 1053.564 | 1101.642 | 1396.921 |
| 23138 | CASKIN1   | 103.4186 | 0.146821 | 0.27267  | 0.538454 | 0.590264 | 0.678199 | 95.94929 | 82.65918 | 116.8829 | 98.21359 | 111.2338 | 115.5726 |
| 18223 | FYCO1     | 5718.824 | 0.146767 | 0.113168 | 1.296893 | 0.194668 | 0.283994 | 5220.834 | 6036.31  | 5033.616 | 5783.441 | 5544.575 | 6694.168 |
| 20292 | ABHD8     | 649.3325 | 0.146646 | 0.149782 | 0.979061 | 0.32755  | 0.429131 | 683.5709 | 523.3257 | 644.2472 | 698.6557 | 624.6203 | 721.5753 |
| 24523 | LOC119611 | 30.62892 | 0.146641 | 0.447985 | 0.327335 | 0.743414 | 0.805924 | 30.35684 | 29.56024 | 27.13352 | 33.4819  | 32.08666 | 31.15436 |
| 18812 | PRMT9     | 901.4996 | 0.146571 | 0.120589 | 1.215461 | 0.22419  | 0.316824 | 862.4594 | 907.6088 | 794.5252 | 1008.921 | 921.9567 | 913.5263 |
| 18959 | DDX56     | 4233.951 | 0.146513 | 0.12275  | 1.193595 | 0.232636 | 0.326221 | 4451.071 | 3503.436 | 4108.989 | 4348.183 | 4019.389 | 4972.638 |
| 19006 | LOC103234 | 1160.075 | 0.146507 | 0.123729 | 1.184093 | 0.236376 | 0.330636 | 1047.311 | 1231.129 | 1021.334 | 1256.687 | 1266.354 | 1137.637 |
| 16363 | AAAS      | 3887.191 | 0.146478 | 0.091852 | 1.594721 | 0.110775 | 0.179973 | 3668.841 | 3869.654 | 3535.707 | 3984.347 | 3972.329 | 4292.267 |
| 20084 | ETV6      | 1593.377 | 0.146313 | 0.144116 | 1.015243 | 0.30999  | 0.410331 | 1348.711 | 1852.442 | 1337.891 | 1696.417 | 1570.107 | 1754.694 |
| 24306 | LOC103234 | 79.73568 | 0.146293 | 0.405562 | 0.360717 | 0.718311 | 0.785629 | 93.23886 | 34.48694 | 98.79385 | 95.98146 | 85.56443 | 70.34856 |
| 20807 | N4BP3     | 383.0494 | 0.146283 | 0.161937 | 0.903333 | 0.366349 | 0.468083 | 402.7702 | 319.6885 | 368.7376 | 381.6937 | 421.4048 | 404.0017 |
| 20902 | STOX1     | 312.6628 | 0.146259 | 0.164272 | 0.890345 | 0.37328  | 0.474771 | 276.464  | 310.9299 | 303.3389 | 305.8014 | 350.8141 | 328.6283 |
| 20017 | ITSN2     | 2632.05  | 0.146143 | 0.142545 | 1.025245 | 0.305247 | 0.405406 | 2206.292 | 3105.467 | 2185.988 | 2732.123 | 2661.054 | 2901.376 |
| 19330 | OGFOD3    | 676.8426 | 0.145717 | 0.128955 | 1.129988 | 0.258481 | 0.355495 | 660.2612 | 599.9633 | 669.2936 | 741.0662 | 658.8461 | 731.6251 |
| 24970 | LOC103221 | 18.77602 | 0.145682 | 0.579054 | 0.251586 | 0.801361 | 0.853191 | 17.88885 | 19.15941 | 16.00182 | 17.85702 | 25.66933 | 16.07967 |
| 19404 | PLA2G12A  | 585.0186 | 0.145583 | 0.130324 | 1.117087 | 0.263957 | 0.361654 | 575.1536 | 521.136  | 569.1083 | 631.6919 | 616.0639 | 596.9578 |
| 19341 | THAP9     | 610.4105 | 0.145537 | 0.128976 | 1.128401 | 0.25915  | 0.356213 | 572.4432 | 581.8988 | 583.0229 | 613.8349 | 695.211  | 616.0524 |
| 22013 | LOC119611 | 267.6597 | 0.145536 | 0.201156 | 0.723498 | 0.469374 | 0.566861 | 239.6022 | 305.4558 | 217.0682 | 249.9982 | 314.4493 | 279.3843 |
| 18357 | TLE3      | 1141.539 | 0.145512 | 0.11438  | 1.272183 | 0.203308 | 0.294435 | 1008.281 | 1167.082 | 1079.079 | 1180.795 | 1165.815 | 1248.185 |
| 25639 | LOC103224 | 90.93799 | 0.145466 | 1.00964  | 1.044077 | 0.885439 | 0.918074 | 7.116354 | 6.957314 | 8.928508 | 4.278221 | 6.029877 |          |
| 23342 | LOC119621 | 103.0733 | 0.145411 | 0.286616 | 0.507337 | 0.611919 | 0.696935 | 117.6327 | 72.80577 | 102.9682 | 107.1421 | 113.3729 | 104.5179 |
| 21271 | HDAC11    | 645.2473 | 0.145393 | 0.173148 | 0.839705 | 0.401074 | 0.501272 | 702.5439 | 504.1663 | 635.2027 | 696.4236 | 558.3079 | 774.8392 |
| 18963 | TBC1D13   | 1180.788 | 0.145344 | 0.121877 | 1.192547 | 0.233047 | 0.326718 | 1234.331 | 1046.104 | 1087.428 | 1220.973 | 1157.259 | 1338.633 |
| 18234 | PANK4     | 1112.222 | 0.145235 | 0.112195 | 1.294485 | 0.195498 | 0.285034 | 1077.668 | 1027.492 | 1068.643 | 1120.528 | 1118.755 | 1260.244 |
| 18243 | GDAP1     | 1081.814 | 0.145231 | 0.112247 | 1.293851 | 0.195717 | 0.285213 | 1008.823 | 1099.203 | 975.4154 | 1129.456 | 1110.198 | 1167.786 |
| 22722 | LOC103237 | 179.1559 | 0.14505  | 0.239672 | 0.605205 | 0.545043 | 0.637706 | 150.1579 | 210.2061 | 149.5822 | 158.481  | 224.6066 | 181.9013 |
| 21223 | TAF6L     | 576.3582 | 0.145012 | 0.171032 | 0.847864 | 0.396514 | 0.496693 | 595.2108 | 464.2052 | 585.8058 | 654.0132 | 485.5781 | 673.3362 |
| 16895 | OSER1     | 1933.619 | 0.144969 | 0.096178 | 1.5073   | 0.131734 | 0.207289 | 1826.831 | 1786.752 | 1893.781 | 2113.824 | 2010.764 | 1969.76  |
| 22631 | SEMA4A    | 132.6615 | 0.144848 | 0.234228 | 0.618405 | 0.536308 | 0.629954 | 113.8381 | 128.0944 | 135.6676 | 131.6955 | 154.016  | 132.6573 |
| 17940 | ZSCAN18   | 1746.613 | 0.144786 | 0.107018 | 1.352912 | 0.176084 | 0.260936 | 1712.993 | 1671.248 | 1597.399 | 1848.201 | 1677.063 | 1972.775 |
| 19822 | PGAP3     | 946.8703 | 0.144717 | 0.13774  | 1.050654 | 0.293418 | 0.393514 | 965.9979 | 766.924  | 968.4581 | 997.7608 | 919.8176 | 1062.263 |
| 24969 | CHRNA10   | 20.84809 | 0.144684 | 0.574493 | 0.251846 | 0.80116  | 0.853011 | 23.30971 | 19.15941 | 16.00182 | 29.01765 | 23.53022 | 14.06971 |
| 20266 | ATRX      | 7308.727 | 0.144626 | 0.146772 | 0.985382 | 0.324437 | 0.425621 | 6171.111 | 8869.714 | 5787.789 | 7629.41  | 7424.853 | 7969.487 |
| 26035 | LOC103227 | 1.671808 | 0.144606 | 1.796943 | 0.080473 | 0.935861 | 0.955595 | 2.168345 | 1.094824 | 1.391463 | 2.232127 | 2.139111 | 1.004979 |
| 24844 | LOC103241 | 27.87395 | 0.144602 | 0.526958 | 0.274409 | 0.78377  | 0.838694 | 28.18849 | 20.25424 | 29.91645 | 29.01765 | 42.78221 | 17.08465 |
| 21427 | TCEAL4    | 4428.464 | 0.14451  | 0.177464 | 0.814305 | 0.41547  | 0.515484 | 3275.286 | 5623.562 | 3293.592 | 4388.362 | 4609.783 | 4480.198 |
| 17958 | MYO18A    | 4422.129 | 0.144262 | 0.106846 | 1.350186 | 0.176956 | 0.261984 | 3927.958 | 4690.772 | 3988.628 | 4602.646 | 4387.316 | 4935.454 |
| 25258 | LOC103211 | 12.48128 | 0.144064 | 0.699917 | 0.20583  | 0.836924 | 0.880881 | 9.757555 | 14.23271 | 11.82743 | 11.16063 | 12.83466 | 15.07469 |
| 17883 | VPS26B    | 2562.677 | 0.143926 | 0.105543 | 1.36368  | 0.172668 | 0.25669  | 2483.84  | 2406.97  | 2421.841 | 2566.946 | 2500.62  | 2995.844 |
| 17293 | CLDN12    | 1636.818 | 0.14379  | 0.099173 | 1.449897 | 0.147087 | 0.226121 | 1531.394 | 1606.106 | 1525.043 | 1743.291 | 1766.905 | 1648.166 |
| 18883 | FAM193B   | 988.5631 | 0.143784 | 0.119174 | 1.206506 | 0.227623 | 0.320475 | 929.136  | 955.781  | 937.8459 | 1037.939 | 939.0696 | 1131.607 |
| 17378 | SH3GLB2   | 3941.923 | 0.143734 | 0.1003   | 1.43304  | 0.151846 | 0.232296 | 3702.45  | 3891.551 | 3647.72  | 4265.595 | 3726.331 | 4417.89  |
| 19945 | ITSN1     | 3270.157 | 0.143527 | 0.138168 | 1.038786 | 0.298904 | 0.398414 | 2844.327 | 3816.555 | 2663.26  | 3419.619 | 3264.283 | 3612.901 |
| 16786 | LOC103214 | 3285.995 | 0.143271 | 0.093754 | 1.528157 | 0.126474 | 0.200304 | 3293.717 | 2922.632 | 3151.663 | 3403.994 | 3538.089 | 3405.875 |
| 19377 | SUN2      | 3541.766 | 0.14312  | 0.12747  | 1.122771 | 0.261535 | 0.358822 | 3611.379 | 2948.907 | 3544.751 | 3727.652 | 3215.083 | 4202.824 |
| 19642 | CCDC71    | 624.7276 | 0.143096 | 0.132626 | 1.078943 | 0.280613 | 0.379803 | 587.6216 | 642.6615 | 551.715  | 667.406  | 624.6203 | 674.3412 |
| 21133 | RSF1      | 4248.961 | 0.143006 | 0.166229 | 0.860291 | 0.389628 | 0.49013  | 3338.71  | 5424.304 | 3352.729 | 4388.362 | 4412.985 | 4576.677 |
| 22918 | LOC103227 | 138.2252 | 0.142918 | 0.247784 | 0.567686 | 0.564084 | 0.654363 | 143.6529 | 128.6418 | 121.753  | 176.338  | 111.2338 | 147.732  |
| 21011 | ZNF564    | 381.9066 | 0.1428   | 0.162539 | 0.878563 | 0.379638 | 0.480632 | 332.841  | 399.6106 | 358.9974 | 357.1403 | 410.7092 | 432.1412 |
| 24143 | LOC103235 | 53.11086 | 0.142791 | 0.372157 | 0.383685 | 0.701212 | 0.772073 | 49.87195 | 54.74118 | 46.614   | 73.66019 | 38.50399 | 55.27387 |
| 18762 | SMAD3     | 1969.343 | 0.14277  | 0.116761 | 1.222747 | 0.221425 | 0.313751 | 1787.259 | 2095.492 | 1737.241 | 1986.593 | 1974.399 | 2235.074 |
| 19277 | EIF2B4    | 1675.341 | 0.142735 | 0.125262 | 1.139487 | 0.2545   | 0.350982 | 1474.475 | 1850.799 | 1453.383 | 1765.612 | 1687.758 | 1820.018 |
| 18938 | HNRNP2H2  | 4791.496 | 0.142434 | 0.118945 | 1.197475 | 0.231121 | 0.324446 | 4270.556 | 5274.86  | 4122.208 | 5147.285 | 4624.757 | 5309.307 |
| 20887 | EPS8L2    | 413.3142 | 0.14242  | 0.159639 | 0.892142 | 0.372317 | 0.473885 | 387.0497 | 358.5547 | 436.2236 | 435.2648 | 391.4573 | 471.3354 |
| 18701 | NIPAA1    | 3169.176 | 0.142347 | 0.115947 | 1.227696 | 0.219561 | 0.312124 | 2796.624 | 3429.535 | 2815.625 | 3361.583 | 3078.18  | 3533.508 |
| 23628 |           |          |          |          |          |          |          |          |          |          |          |          |          |



|       |           |          |          |          |          |          |          |          |          |          |          |          |          |
|-------|-----------|----------|----------|----------|----------|----------|----------|----------|----------|----------|----------|----------|----------|
| 19694 | PIGX      | 783.044  | 0.141505 | 0.132125 | 1.07099  | 0.284174 | 0.383568 | 674.8975 | 836.9927 | 722.8649 | 812.4942 | 812.8621 | 838.1529 |
| 24666 | TMEM270   | 33.09551 | 0.141459 | 0.463128 | 0.305444 | 0.760028 | 0.819158 | 41.74065 | 23.53871 | 29.22072 | 37.94616 | 29.94755 | 36.17926 |
| 17975 | NAA40     | 1773.879 | 0.141378 | 0.104903 | 1.347702 | 0.177754 | 0.262898 | 1744.976 | 1673.985 | 1646.796 | 1866.058 | 1715.567 | 1995.889 |
| 21724 | ZNF764    | 258.5711 | 0.141125 | 0.18224  | 0.774392 | 0.438699 | 0.536863 | 275.3799 | 227.1759 | 235.1572 | 287.9444 | 252.4151 | 273.3544 |
| 21113 | LOC103224 | 309.654  | 0.141054 | 0.163394 | 0.863276 | 0.387986 | 0.488543 | 284.5953 | 317.4989 | 282.4669 | 316.962  | 318.7275 | 337.6731 |
| 27832 | LOC119624 | 0.721992 | 0.14098  | 3.153564 | 0.044705 | 0.964343 | NA       | 1.626259 | 0        | 0.695731 | 0        | 0        | 2.009959 |
| 20670 | NDUFA2    | 2022.84  | 0.14086  | 0.152111 | 0.926035 | 0.354428 | 0.455852 | 2138.531 | 1445.715 | 2189.467 | 2138.378 | 2064.242 | 2160.706 |
| 19788 | GBX2      | 581.1444 | 0.140729 | 0.133395 | 1.05498  | 0.291435 | 0.39154  | 554.5544 | 555.623  | 549.6278 | 647.3168 | 547.6123 | 632.1321 |
| 25290 | LOC119624 | 12.48261 | 0.140622 | 0.701817 | 0.200368 | 0.841193 | 0.884267 | 13.55216 | 9.306001 | 12.52316 | 15.62489 | 12.83466 | 11.05477 |
| 19485 | LOC10324  | 640.9653 | 0.14058  | 0.127422 | 1.103264 | 0.269913 | 0.368264 | 610.9313 | 614.1961 | 606.6778 | 685.263  | 618.203  | 710.5205 |
| 19708 | PEAR1     | 1315.51  | 0.140519 | 0.131524 | 1.068393 | 0.285343 | 0.384912 | 1173.617 | 1360.318 | 1227.27  | 1303.562 | 1236.406 | 1591.887 |
| 25912 | LOC119615 | 3.041302 | 0.14049  | 1.364925 | 0.102929 | 0.918019 | 0.94188  | 2.710432 | 3.831883 | 2.087194 | 4.464254 | 2.139111 | 3.014938 |
| 19305 | NACC2     | 2205.55  | 0.140465 | 0.123887 | 1.133816 | 0.256872 | 0.353739 | 2206.292 | 1891.308 | 2204.077 | 2263.377 | 2049.268 | 2618.976 |
| 18016 | PPP3R1    | 2246.434 | 0.140444 | 0.104751 | 1.340744 | 0.180003 | 0.265619 | 1937.959 | 2305.151 | 2168.595 | 2386.144 | 2323.074 | 2357.682 |
| 22465 | SGF29     | 225.087  | 0.140438 | 0.217183 | 0.646634 | 0.517869 | 0.612844 | 189.7302 | 262.2103 | 192.7176 | 212.0521 | 222.4675 | 271.3445 |
| 17849 | RALGAPB   | 7292.452 | 0.140285 | 0.102468 | 1.369052 | 0.170983 | 0.254669 | 6714.282 | 7670.882 | 6433.428 | 7526.732 | 7258.002 | 8151.388 |
| 18727 | MLST8     | 1176.252 | 0.1402   | 0.11426  | 1.227028 | 0.219812 | 0.312237 | 1161.691 | 1150.112 | 1049.163 | 1218.741 | 1157.259 | 1320.543 |
| 17297 | CNOT7     | 4496.729 | 0.140174 | 0.096757 | 1.448715 | 0.147417 | 0.226576 | 4059.143 | 4688.035 | 4086.726 | 4678.538 | 4810.86  | 4657.075 |
| 19509 | LRP6      | 3339.981 | 0.140069 | 0.127345 | 1.099918 | 0.271368 | 0.369794 | 2898.536 | 3776.594 | 2861.543 | 3374.976 | 3377.656 | 3750.583 |
| 17683 | HSPA8     | 91455.96 | 0.14     | 0.100827 | 1.388516 | 0.16498  | 0.248034 | 81994.9  | 98678.64 | 80392.46 | 96450.21 | 94080.23 | 97139.31 |
| 23118 | RIBC1     | 107.5693 | 0.139964 | 0.258839 | 0.540737 | 0.588689 | 0.676974 | 91.07051 | 105.1031 | 109.9256 | 111.6063 | 126.2075 | 101.5029 |
| 22287 | ADAM8     | 544.6945 | 0.139963 | 0.20695  | 0.676314 | 0.498841 | 0.595042 | 576.7799 | 379.3564 | 603.1991 | 533.4783 | 474.8826 | 700.4707 |
| 18271 | CDC25B    | 2110.662 | 0.139847 | 0.108437 | 1.289662 | 0.197168 | 0.2869   | 2100.585 | 1897.329 | 2033.623 | 2171.86  | 2038.572 | 2422.001 |
| 17567 | ARHGAP12  | 2837.336 | 0.139659 | 0.099404 | 1.404956 | 0.160034 | 0.242188 | 2533.712 | 2939.601 | 2625.69  | 2973.193 | 3018.285 | 2923.535 |
| 19544 | MCM9      | 607.6826 | 0.139588 | 0.127889 | 1.091475 | 0.275064 | 0.37416  | 557.8069 | 608.7219 | 569.1083 | 647.3168 | 613.9248 | 649.2167 |
| 23526 | LOC10324  | 93.54023 | 0.139582 | 0.291195 | 0.479342 | 0.631696 | 0.713833 | 104.0806 | 67.87906 | 95.3152  | 98.21359 | 96.25998 | 99.49297 |
| 18932 | LOC119624 | 2284.274 | 0.139374 | 0.116307 | 1.198329 | 0.230789 | 0.324098 | 2248.574 | 2091.113 | 2190.858 | 2189.717 | 2241.788 | 2743.594 |
| 20604 | MARVELD2  | 547.128  | 0.139286 | 0.148747 | 0.936398 | 0.349068 | 0.450397 | 492.7565 | 593.3944 | 477.2717 | 582.5851 | 534.7777 | 601.9827 |
| 25699 | LNK1      | 7.805945 | 0.139254 | 1.032188 | 0.134912 | 0.892682 | 0.923458 | 8.131296 | 1.094824 | 13.2189  | 8.928508 | 6.417332 | 9.044815 |
| 17570 | CERK      | 1745.978 | 0.139243 | 0.099116 | 1.40486  | 0.160063 | 0.24219  | 1699.983 | 1617.602 | 1671.842 | 1803.559 | 1758.349 | 1924.536 |
| 18789 | SEPTIN11  | 15830.73 | 0.13911  | 0.114076 | 1.219452 | 0.222673 | 0.315065 | 13943    | 17601.48 | 13662.08 | 16256.58 | 16081.83 | 17439.41 |
| 19519 | BCKDHA    | 1410.766 | 0.139109 | 0.126662 | 1.098268 | 0.272088 | 0.370585 | 1416.472 | 1246.457 | 1371.982 | 1448.65  | 1302.718 | 1678.316 |
| 18167 | VAT1      | 6005.569 | 0.138997 | 0.106154 | 1.309387 | 0.190403 | 0.27863  | 5805.745 | 5601.665 | 5751.611 | 5912.904 | 5796.99  | 7164.499 |
| 24618 | LOC119624 | 35.40191 | 0.138938 | 0.443917 | 1.312983 | 0.754294 | 0.814563 | 38.48813 | 30.10765 | 33.39511 | 24.5534  | 40.6431  | 45.22408 |
| 16519 | VAPA      | 6190.834 | 0.138797 | 0.088312 | 1.571664 | 0.116029 | 0.186732 | 6142.923 | 5614.803 | 5925.544 | 6546.828 | 6190.586 | 6724.318 |
| 21969 | LOC10323  | 204.2314 | 0.138724 | 0.189336 | 0.732688 | 0.463749 | 0.561189 | 187.0198 | 205.8268 | 189.9347 | 216.5163 | 216.0502 | 210.0407 |
| 18333 | TSPYL1    | 5067.918 | 0.138695 | 0.10854  | 1.277828 | 0.20131  | 0.291923 | 4600.145 | 5465.907 | 4409.545 | 5294.605 | 5086.805 | 5550.502 |
| 19825 | PIN4      | 926.5049 | 0.138639 | 0.131969 | 1.050541 | 0.293469 | 0.393538 | 806.6245 | 995.1947 | 844.6179 | 899.5472 | 1033.19  | 979.855  |
| 24978 | LOC119624 | 22.20876 | 0.138327 | 0.553164 | 0.250065 | 0.802537 | 0.85417  | 18.97302 | 24.63353 | 20.17621 | 13.39276 | 29.94755 | 26.12947 |
| 17451 | UBN1      | 3077.212 | 0.138323 | 0.097528 | 1.418287 | 0.156107 | 0.237815 | 2927.266 | 3078.644 | 2788.491 | 3073.639 | 3155.188 | 3440.045 |
| 20259 | PRPF18    | 694.9851 | 0.138303 | 0.140247 | 0.986139 | 0.324065 | 0.425256 | 639.1198 | 754.3335 | 592.0674 | 696.4236 | 742.2714 | 745.6948 |
| 20881 | AP4M1     | 845.1392 | 0.138194 | 0.154804 | 0.892704 | 0.372016 | 0.473638 | 937.8094 | 650.3252 | 827.9203 | 886.1544 | 829.9749 | 938.6508 |
| 21324 | NAP1L5    | 324.1679 | 0.138148 | 0.166687 | 0.82879  | 0.407223 | 0.507692 | 337.7198 | 312.5721 | 274.8139 | 352.6761 | 331.5622 | 335.6631 |
| 25200 | LOC119618 | 21.23216 | 0.138129 | 0.643444 | 0.214672 | 0.830023 | 0.875641 | 14.63633 | 31.74989 | 13.2189  | 26.78552 | 29.94755 | 11.05477 |
| 21943 | CCDC120   | 238.2923 | 0.138017 | 0.187206 | 0.737246 | 0.460973 | 0.558491 | 215.2083 | 208.5639 | 257.4206 | 254.4625 | 243.8586 | 250.2399 |
| 17419 | USP15     | 3787.947 | 0.137681 | 0.096549 | 1.426028 | 0.15386  | 0.234823 | 3415.144 | 3936.438 | 3469.612 | 3993.275 | 3961.633 | 3951.579 |
| 24797 | LOC119624 | 26.98646 | 0.137471 | 0.488374 | 0.281487 | 0.778337 | 0.834459 | 27.6464  | 22.9913  | 25.74206 | 33.4819  | 29.94755 | 22.10955 |
| 26095 | LOC119624 | 1.656305 | 0.137456 | 1.918126 | 0.071662 | 0.942871 | 0.960576 | 2.168345 | 1.094824 | 1.391463 | 0        | 4.278221 | 1.004979 |
| 21037 | TIAF1     | 949.7522 | 0.137414 | 0.156995 | 0.875279 | 0.381422 | 0.482013 | 790.904  | 1124.384 | 799.3953 | 959.8146 | 981.8518 | 1042.164 |
| 18264 | TGFBRAP1  | 1762.033 | 0.137377 | 0.106444 | 1.290601 | 0.196842 | 0.286522 | 1748.229 | 1595.705 | 1696.193 | 1799.094 | 1739.097 | 1993.879 |
| 23498 | LOC10324  | 84.7714  | 0.137157 | 0.282932 | 0.484771 | 0.627839 | 0.71032  | 89.44425 | 78.27989 | 75.13899 | 82.5887  | 87.70354 | 95.47305 |
| 20576 | NUDT22    | 1951.659 | 0.137074 | 0.145608 | 0.94139  | 0.346505 | 0.447698 | 2023.608 | 1459.4   | 2096.239 | 2120.521 | 1869.583 | 2140.606 |
| 18805 | LOC103224 | 883.802  | 0.136812 | 0.112458 | 1.216561 | 0.223771 | 0.31635  | 857.0385 | 853.415  | 816.0929 | 933.0291 | 900.5656 | 942.6707 |
| 18245 | CDH2      | 12116.31 | 0.136778 | 0.105761 | 1.293274 | 0.195916 | 0.285472 | 10996.76 | 12870.75 | 10765.05 | 12265.54 | 12000.41 | 13799.37 |
| 25564 | LOC119624 | 11.09244 | 0.136744 | 0.877344 | 0.155861 | 0.876143 | 0.911099 | 4.878777 | 20.80165 | 5.565851 | 11.16063 | 17.11289 | 7.034856 |
| 20287 | PCSK7     | 1543.338 | 0.136692 | 0.139444 | 0.980268 | 0.326954 | 0.428455 | 1664.205 | 1246.457 | 1504.867 | 1591.507 | 1446.039 | 1806.953 |
| 19488 | TP53BP2   | 6312.863 | 0.136685 | 0.123954 | 1.102708 | 0.270154 | 0.368537 | 5464.231 | 7220.909 | 5357.132 | 6582.542 | 6520.009 | 6732.357 |
| 19034 | ZBTB43    | 1253.485 | 0.136525 | 0.115828 | 1.178691 | 0.238521 | 0.333128 | 1191.506 | 1222.918 | 1173.699 | 1303.562 | 1185.067 | 1444.155 |
| 16696 | SNX13     | 6573.796 | 0.136411 | 0.088402 | 1.543073 | 0.122813 | 0.195543 | 6099.556 | 6683.351 | 6009.032 | 6772.273 | 6804.511 | 7074.05  |
| 19522 | INTS6     | 1915.325 | 0.13638  | 0.124257 | 1.097566 | 0.272394 | 0.370945 | 1676.673 | 2126.695 | 1670.451 | 1937.486 | 2087.772 | 1992.874 |
| 19730 | EOLA2     | 1079.963 | 0.136346 | 0.128162 | 1.063861 | 0.287392 | 0.387243 | 1145.971 | 954.6862 | 990.0257 | 1120.528 | 1037.469 | 1231.1   |
| 21168 | LOC10323  | 528.3596 | 0.136343 | 0.159429 | 0.855193 | 0.392444 | 0.492873 | 500.8878 | 561.0971 | 446.6595 | 493.3001 | 639.5941 | 528.6192 |
| 20362 | ZNF282    | 1487.692 | 0.136217 | 0.140774 | 0.967632 | 0.333228 | 0.435069 | 1581.266 | 1234.414 | 1442.947 | 1493.293 | 1373.309 | 1800.923 |
| 19971 | OTUD5     | 3030.45  | 0.135826 | 0.131353 | 1.034051 | 0.301112 | 0.400835 | 2620.988 | 3470.043 | 2574.206 | 3207.566 | 2973.364 | 3336.532 |
| 18323 | CEP164    | 2134.579 | 0.135745 | 0.106116 | 1.279204 | 0.200825 | 0.291379 | 2004.635 | 2206.07  | 1895.172 | 2198.645 | 2141.25  | 2361.702 |
| 18976 | TDG       | 1267.546 | 0.135714 | 0.114127 | 1.189145 | 0.234382 | 0.328341 | 1171.991 | 1306.125 | 1145.87  | 1243.295 | 1405.396 | 1332.603 |
| 20492 | FNBP4     | 3364.071 | 0.135688 | 0.143099 | 0.948214 | 0.343021 | 0.445013 | 2881.731 | 4019.098 | 2716.135 | 3475.422 | 3593.706 | 3498.334 |
| 19682 | CDC14A    | 847.1407 | 0.13565  | 0.12644  | 1.072836 | 0.283345 | 0.382721 | 755.1263 | 900.4924 | 766.0002 | 881.6902 | 894.1483 | 885.3869 |
| 18351 | ATP5PF    | 2053.75  | 0.135544 | 0.106481 | 1.272939 | 0.20304  | 0.294143 | 1967.231 | 1780.183 | 2126.155 | 2100.431 | 2179.754 | 2168.746 |
| 18131 | TAPBP1    | 1269.721 | 0.135525 |          |          |          |          |          |          |          |          |          |          |



|       |           |          |          |          |          |          |          |          |          |          |          |          |          |
|-------|-----------|----------|----------|----------|----------|----------|----------|----------|----------|----------|----------|----------|----------|
| 25946 | LOC103235 | 4.108034 | 0.134644 | 1.391919 | 0.096733 | 0.922939 | 0.945669 | 6.505036 | 2.189647 | 2.782925 | 11.16063 | 0        | 2.009959 |
| 18459 | NFKB2     | 2364.241 | 0.134611 | 0.107283 | 1.25473  | 0.209577 | 0.301844 | 2070.228 | 2427.224 | 2269.476 | 2392.84  | 2376.552 | 2649.126 |
| 21511 | ORMDL2    | 871.3522 | 0.134585 | 0.167811 | 0.802002 | 0.422552 | 0.522165 | 936.1832 | 619.6702 | 936.4544 | 950.8861 | 883.4527 | 901.4666 |
| 25792 | LOC119627 | 4.753792 | 0.134575 | 1.115706 | 0.120619 | 0.903993 | 0.931722 | 2.710432 | 5.474118 | 5.565851 | 4.464254 | 4.278221 | 6.029877 |
| 23643 | LOC119627 | 95.93063 | 0.134572 | 0.291118 | 0.462259 | 0.643896 | 0.724018 | 87.81799 | 101.2712 | 86.27069 | 116.0706 | 70.59065 | 113.5627 |
| 19576 | LOC103246 | 1225.86  | 0.134389 | 0.123511 | 1.088073 | 0.276563 | 0.375564 | 1084.715 | 1329.663 | 1092.994 | 1279.009 | 1249.241 | 1319.538 |
| 21509 | ANKDD1B   | 388.0628 | 0.134371 | 0.167503 | 0.802204 | 0.422435 | 0.522127 | 384.8813 | 401.8003 | 324.9066 | 352.6761 | 429.9612 | 434.1511 |
| 19169 | RP2       | 802.5098 | 0.134351 | 0.116042 | 1.157774 | 0.246956 | 0.342497 | 793.0724 | 746.6697 | 754.1728 | 857.1368 | 844.9487 | 819.0583 |
| 19732 | TSKU      | 989.784  | 0.134164 | 0.126131 | 1.063683 | 0.287472 | 0.387293 | 929.136  | 935.5268 | 973.3282 | 988.8323 | 939.0696 | 1172.811 |
| 18665 | LRCH4     | 1291.878 | 0.13411  | 0.108794 | 1.232695 | 0.21769  | 0.310012 | 1180.664 | 1330.758 | 1184.135 | 1348.205 | 1349.779 | 1357.727 |
| 21981 | LOC119618 | 945.8584 | 0.134019 | 0.183365 | 0.730883 | 0.464851 | 0.562215 | 744.8267 | 1210.875 | 749.9984 | 966.511  | 998.9647 | 1003.974 |
| 25369 | LOC119627 | 13.10822 | 0.133997 | 0.716301 | 0.187068 | 0.851607 | 0.892427 | 12.46799 | 13.13788 | 11.1317  | 15.62489 | 19.252   | 7.034856 |
| 20343 | CILK1     | 1004.554 | 0.133976 | 0.138067 | 0.970373 | 0.33186  | 0.433688 | 900.9475 | 1127.668 | 844.6179 | 1060.26  | 1039.608 | 1054.223 |
| 25896 | LOC103234 | 4.690966 | 0.133922 | 1.276351 | 0.104925 | 0.916435 | 0.940822 | 7.047123 | 1.642235 | 4.87012  | 0        | 8.556443 | 6.029877 |
| 18335 | APTX      | 1356.709 | 0.133715 | 0.104683 | 1.277334 | 0.201485 | 0.292128 | 1362.263 | 1267.258 | 1254.404 | 1383.919 | 1401.117 | 1471.29  |
| 19619 | COPE      | 5052.299 | 0.133689 | 0.123478 | 1.082699 | 0.278942 | 0.377984 | 5144.942 | 3965.999 | 5343.913 | 5564.693 | 5097.501 | 5196.749 |
| 24988 | PBX4      | 27.94138 | 0.133635 | 0.539884 | 0.247526 | 0.804501 | 0.855917 | 31.44101 | 23.53871 | 23.65487 | 29.01765 | 44.92132 | 15.07469 |
| 19226 | ARMH3     | 1358.575 | 0.133461 | 0.116067 | 1.14986  | 0.250202 | 0.345969 | 1316.728 | 1360.866 | 1214.747 | 1381.687 | 1317.692 | 1559.728 |
| 20200 | KBTBD6    | 819.4677 | 0.133457 | 0.1339   | 0.996695 | 0.318912 | 0.419717 | 779.5202 | 857.2469 | 711.7332 | 819.1906 | 806.4447 | 942.6707 |
| 17712 | RNF149    | 2035.529 | 0.133383 | 0.096484 | 1.382442 | 0.166836 | 0.2504   | 2050.713 | 1906.635 | 1867.343 | 2131.681 | 2109.163 | 2147.641 |
| 21973 | BEAN1     | 405.3277 | 0.133345 | 0.182204 | 0.731847 | 0.464262 | 0.56169  | 328.5043 | 476.7957 | 355.5187 | 419.6399 | 404.2919 | 447.2159 |
| 18330 | ARF5      | 1672.943 | 0.133328 | 0.104288 | 1.278462 | 0.201086 | 0.291647 | 1533.562 | 1674.533 | 1575.136 | 1866.058 | 1724.123 | 1664.246 |
| 22314 | CYSLTR2   | 223.4763 | 0.133268 | 0.19809  | 0.672765 | 0.501097 | 0.597009 | 189.1881 | 241.956  | 206.6322 | 236.6055 | 252.4151 | 214.0606 |
| 20260 | FAM98A    | 2108.544 | 0.13323  | 0.135133 | 0.98592  | 0.324172 | 0.425376 | 1744.434 | 2399.853 | 1892.389 | 2073.646 | 2171.197 | 2369.742 |
| 24919 | LOC119627 | 26.99446 | 0.133055 | 0.509859 | 0.260965 | 0.794119 | 0.847178 | 34.15144 | 20.80165 | 21.56767 | 31.24978 | 32.08666 | 22.10955 |
| 21392 | LRR6C1    | 604.8536 | 0.132914 | 0.162587 | 0.817495 | 0.413645 | 0.51406  | 618.5205 | 477.3431 | 639.3771 | 578.1209 | 603.2292 | 712.5304 |
| 20402 | ZNF428    | 707.42   | 0.132498 | 0.137904 | 0.9608   | 0.336653 | 0.438678 | 688.4497 | 636.6399 | 705.4716 | 703.12   | 671.6807 | 839.1579 |
| 20689 | DDA1      | 1402.466 | 0.132424 | 0.143395 | 0.923491 | 0.355751 | 0.45716  | 1173.075 | 1619.244 | 1223.096 | 1515.614 | 1356.196 | 1527.569 |
| 19487 | MIEN1     | 1495.611 | 0.132293 | 0.119936 | 1.103035 | 0.270012 | 0.368362 | 1525.973 | 1246.457 | 1511.129 | 1578.114 | 1490.96  | 1621.032 |
| 20061 | ZCCHC2    | 2009.284 | 0.132223 | 0.129735 | 1.019179 | 0.308118 | 0.40832  | 1742.266 | 2252.6   | 1760.2   | 1982.129 | 2049.268 | 2269.244 |
| 19840 | RABGGTA   | 821.2113 | 0.132145 | 0.126185 | 1.047236 | 0.294991 | 0.395012 | 795.2407 | 786.6308 | 774.349  | 828.1191 | 787.1927 | 955.7355 |
| 26090 | LOC103220 | 2.394228 | 0.132119 | 1.82762  | 0.07229  | 0.942371 | 0.960224 | 5.420864 | 0.547412 | 0.695731 | 6.696381 | 0        | 1.004979 |
| 21385 | LOC103238 | 397.1733 | 0.132003 | 0.161334 | 0.818197 | 0.413245 | 0.513709 | 371.8712 | 418.2226 | 349.9529 | 381.6937 | 400.0137 | 461.2856 |
| 24166 | EXOC3L1   | 58.86849 | 0.131999 | 0.346865 | 0.830548 | 0.703538 | 0.774009 | 58.54533 | 45.98259 | 64.70302 | 51.33892 | 66.31243 | 66.32864 |
| 19376 | CADPS2    | 1194.254 | 0.131972 | 0.11747  | 1.123454 | 0.261245 | 0.35846  | 1220.236 | 1178.578 | 1020.638 | 1209.813 | 1259.936 | 1276.324 |
| 18586 | LYSMD3    | 2602.443 | 0.131817 | 0.106551 | 1.237133 | 0.216038 | 0.309016 | 2292.483 | 2709.141 | 2444.8   | 2830.337 | 2787.261 | 2550.638 |
| 19047 | ARL8B     | 4064.136 | 0.131664 | 0.111804 | 1.177628 | 0.238945 | 0.333526 | 3582.107 | 4446.626 | 3606.671 | 4136.131 | 4404.429 | 4208.854 |
| 20803 | RFXANK    | 1017.184 | 0.131639 | 0.145598 | 0.904127 | 0.365928 | 0.467641 | 1048.395 | 833.1608 | 1036.64  | 948.654  | 1018.217 | 1218.035 |
| 18327 | CNPY2     | 2204.944 | 0.131615 | 0.102923 | 1.278772 | 0.200977 | 0.29152  | 2235.564 | 1925.247 | 2153.289 | 2352.662 | 2235.371 | 2327.532 |
| 25504 | A3GALT2   | 11.21044 | 0.131511 | 0.805556 | 0.163254 | 0.870318 | 0.907207 | 5.420864 | 10.94824 | 15.30609 | 17.85702 | 10.69555 | 7.034856 |
| 18596 | MED21     | 2306.782 | 0.131508 | 0.106398 | 1.236001 | 0.216458 | 0.309452 | 2089.201 | 2168.846 | 2343.223 | 2372.751 | 2622.55  | 2244.119 |
| 21865 | LOC103216 | 521.7592 | 0.131386 | 0.175137 | 0.750191 | 0.45314  | 0.550899 | 462.9418 | 593.3944 | 433.4406 | 618.2992 | 556.1688 | 466.3105 |
| 20294 | GIT2      | 1287.584 | 0.131326 | 0.134242 | 0.978274 | 0.327939 | 0.42947  | 1117.782 | 1417.797 | 1153.523 | 1404.008 | 1204.319 | 1428.076 |
| 26120 | SERPINI2  | 1.726218 | 0.131227 | 1.918443 | 0.068403 | 0.945465 | 0.962297 | 1.084173 | 0.547412 | 3.478657 | 2.232127 | 0        | 3.014938 |
| 21356 | TM2D3     | 683.8255 | 0.131166 | 0.159313 | 0.823323 | 0.410324 | 0.51081  | 731.2745 | 530.9895 | 699.21   | 700.8879 | 656.707  | 783.884  |
| 17864 | RPL8      | 26636.42 | 0.131144 | 0.095947 | 1.366839 | 0.171676 | 0.255455 | 26100.92 | 22768.5  | 27412.51 | 28205.16 | 27036.22 | 28295.2  |
| 24726 | ALOX12B   | 35.46283 | 0.131045 | 0.444456 | 0.294843 | 0.768114 | 0.825864 | 30.89892 | 33.93953 | 35.4823  | 42.41041 | 44.92132 | 25.12449 |
| 24602 | SLC29A4   | 46.66831 | 0.130999 | 0.414544 | 0.316006 | 0.751998 | 0.812611 | 48.78777 | 37.224   | 45.91827 | 58.0353  | 59.8951  | 30.14938 |
| 22491 | LOC119626 | 259.5725 | 0.130942 | 0.204524 | 0.640226 | 0.522026 | 0.61705  | 221.1712 | 307.6454 | 213.5895 | 276.7837 | 275.9453 | 262.2996 |
| 22229 | ARHGAP44  | 205.4906 | 0.130906 | 0.19042  | 0.687461 | 0.491792 | 0.588164 | 205.9928 | 181.7407 | 200.3706 | 218.7484 | 216.0502 | 210.0407 |
| 19060 | CEP68     | 1805.582 | 0.130862 | 0.111317 | 1.175587 | 0.23976  | 0.334419 | 1787.259 | 1764.856 | 1625.228 | 1787.934 | 1781.879 | 2086.337 |
| 18914 | PDXDC1    | 4349.204 | 0.130743 | 0.108823 | 1.201433 | 0.229583 | 0.322696 | 4229.9   | 4214.524 | 4021.327 | 4223.184 | 4222.604 | 5183.684 |
| 22769 | LOC119627 | 175.055  | 0.130658 | 0.218588 | 0.597733 | 0.550018 | 0.642199 | 195.1511 | 143.4219 | 162.8011 | 187.4987 | 177.5462 | 183.9112 |
| 19020 | IFT122    | 2253.975 | 0.130641 | 0.110598 | 1.181225 | 0.237513 | 0.331982 | 2179.187 | 2261.358 | 2021.1   | 2328.108 | 2141.25  | 2592.847 |
| 20814 | P4HTM     | 1298.491 | 0.130622 | 0.144699 | 0.902711 | 0.366679 | 0.468348 | 1313.475 | 1077.854 | 1334.413 | 1310.259 | 1170.094 | 1584.853 |
| 19380 | STRIP1    | 1479.235 | 0.13058  | 0.116454 | 1.121298 | 0.262161 | 0.359626 | 1410.509 | 1426.555 | 1406.073 | 1546.864 | 1366.892 | 1718.515 |
| 19116 | DYNLL1    | 4888.264 | 0.130208 | 0.111715 | 1.16554  | 0.243801 | 0.339058 | 4487.391 | 4331.67  | 5179.024 | 5517.818 | 5210.874 | 4602.806 |
| 20745 | PDIA5     | 518.2865 | 0.130035 | 0.142723 | 0.911101 | 0.362242 | 0.464218 | 488.4198 | 532.6317 | 466.8357 | 506.6928 | 526.2212 | 588.918  |
| 24333 | LOC119627 | 71.69417 | 0.130001 | 0.363954 | 0.357191 | 0.720949 | 0.787681 | 84.56547 | 47.62483 | 75.13899 | 58.0353  | 66.31243 | 98.48799 |
| 19425 | ATOX1     | 1331.114 | 0.129822 | 0.116483 | 1.114522 | 0.265055 | 0.362754 | 1338.953 | 1132.595 | 1344.153 | 1399.544 | 1343.361 | 1428.076 |
| 18905 | KDM2A     | 5207.089 | 0.129702 | 0.107859 | 1.202519 | 0.229162 | 0.322258 | 4641.886 | 5641.079 | 4639.137 | 5323.623 | 5298.577 | 5698.234 |
| 19010 | TOGARAM   | 1954.311 | 0.129677 | 0.109624 | 1.182924 | 0.236839 | 0.331214 | 1822.494 | 2052.794 | 1726.805 | 1950.879 | 2034.294 | 2138.596 |
| 17990 | PLAUR     | 3392.605 | 0.129615 | 0.096373 | 1.344924 | 0.17865  | 0.264002 | 3264.986 | 3370.415 | 3090.439 | 3508.904 | 3339.152 | 3781.738 |
| 17472 | ZFAND5    | 12393.44 | 0.129533 | 0.091512 | 1.415467 | 0.156932 | 0.23877  | 11973.6  | 12128.46 | 11417.65 | 12613.75 | 12171.54 | 14055.64 |
| 23841 | LOC103214 | 80.12325 | 0.129315 | 0.299708 | 0.43147  | 0.666126 | 0.742777 | 87.81799 | 66.23683 | 75.13899 | 75.89232 | 96.25998 | 79.39338 |
| 25139 | TPPP3     | 19.54945 | 0.129261 | 0.575367 | 0.224658 | 0.822246 | 0.869541 | 21.14137 | 19.70683 | 14.61036 | 20.08914 | 25.66933 | 16.07967 |
| 17178 | SLC31A1   | 6769.822 | 0.129032 | 0.08772  | 1.470964 | 0.141301 | 0.218673 | 6435.649 | 6800.497 | 6167.659 | 7165.128 | 6780.981 | 7269.017 |
| 23270 | HAP1      | 133.0487 | 0.129001 | 0.24868  | 0.518743 | 0.60394  | 0.689976 | 129.5586 | 110.0298 | 139.842  | 142.8561 | 160.4333 | 115.5726 |
| 18268 | WLS       | 2776.131 | 0.128675 | 0.099765 | 1.289781 | 0.197127 | 0.286874 | 2577.621 | 2722.279 | 2663.955 | 2841.498 | 2703.836 | 3147.596 |
| 19194 | APBB1     | 3009.004 | 0.128582 | 0.111341 | 1.154848 | 0.248153 | 0.343709 | 3106.155 | 25       |          |          |          |          |



|       |           |          |          |          |          |          |          |          |          |          |          |          |          |
|-------|-----------|----------|----------|----------|----------|----------|----------|----------|----------|----------|----------|----------|----------|
| 17426 | GLUD1     | 7371.004 | 0.128255 | 0.090078 | 1.423818 | 0.154499 | 0.235703 | 7349.607 | 6952.13  | 6832.778 | 7854.855 | 7176.716 | 8059.935 |
| 25259 | GPRC5D    | 17.55363 | 0.128232 | 0.623081 | 0.205803 | 0.836945 | 0.880881 | 15.17842 | 13.6853  | 20.87194 | 17.85702 | 25.66933 | 12.05975 |
| 21003 | ZNF318    | 2422.23  | 0.128106 | 0.145829 | 0.878468 | 0.37969  | 0.480632 | 1978.073 | 2890.882 | 2076.758 | 2499.982 | 2421.473 | 2666.211 |
| 19747 | UBE2D1    | 1596.144 | 0.128056 | 0.120738 | 1.06061  | 0.288867 | 0.388896 | 1438.155 | 1738.58  | 1401.203 | 1604.899 | 1651.393 | 1742.634 |
| 18387 | CERS2     | 7083.431 | 0.127918 | 0.100983 | 1.266718 | 0.205256 | 0.296771 | 7020.018 | 6456.175 | 6841.127 | 7118.253 | 6847.293 | 8217.717 |
| 21891 | CRTC2     | 718.0689 | 0.127784 | 0.17139  | 0.745575 | 0.455924 | 0.553686 | 568.1065 | 867.6477 | 622.6796 | 787.9408 | 712.3239 | 749.7147 |
| 18301 | CAPN2     | 16571.57 | 0.127629 | 0.099584 | 1.281628 | 0.199973 | 0.290491 | 15763.33 | 16725.62 | 15036.15 | 15733.54 | 16141.73 | 19189.08 |
| 20040 | DENND4B   | 2021.6   | 0.127526 | 0.124837 | 1.021538 | 0.307    | 0.407281 | 1971.568 | 1799.343 | 2032.927 | 2116.056 | 1811.827 | 2397.881 |
| 21750 | PLEKHH3   | 824.6983 | 0.1275   | 0.165869 | 0.768679 | 0.442084 | 0.540359 | 857.0385 | 630.6184 | 881.4916 | 854.9046 | 742.2714 | 981.8649 |
| 19494 | YIPF3     | 3520.435 | 0.127491 | 0.115752 | 1.101413 | 0.270717 | 0.369172 | 3184.757 | 3744.297 | 3171.144 | 3665.153 | 3309.204 | 4048.057 |
| 21663 | SLC41A3   | 2333.908 | 0.127335 | 0.162844 | 0.781945 | 0.434247 | 0.532911 | 2636.166 | 1694.24  | 2366.878 | 2401.769 | 2115.58  | 2788.818 |
| 20433 | SNRNP48   | 1308.72  | 0.127256 | 0.133001 | 0.956805 | 0.338666 | 0.440632 | 1172.533 | 1470.896 | 1109.692 | 1390.615 | 1317.692 | 1390.892 |
| 22544 | SLC2A6    | 851.9236 | 0.127248 | 0.200879 | 0.63346  | 0.526434 | 0.620797 | 1006.654 | 554.5282 | 884.9703 | 857.1368 | 787.1927 | 1021.059 |
| 19263 | PKN2      | 4732.046 | 0.127218 | 0.111348 | 1.14253  | 0.253234 | 0.34949  | 4126.361 | 5204.792 | 4237.7   | 5017.821 | 4960.598 | 4845.006 |
| 21206 | DUSP19    | 366.2942 | 0.127214 | 0.149823 | 0.849092 | 0.39583  | 0.496234 | 363.1979 | 337.7531 | 349.9529 | 372.7652 | 387.179  | 386.9171 |
| 19067 | HCCS      | 1136.538 | 0.127105 | 0.108207 | 1.174642 | 0.240138 | 0.334815 | 1111.819 | 1100.845 | 1045.684 | 1142.849 | 1249.241 | 1168.791 |
| 22668 | LOC119615 | 173.1191 | 0.126967 | 0.207445 | 0.612052 | 0.540503 | 0.633917 | 156.1209 | 179.0037 | 160.0182 | 187.4987 | 188.2417 | 167.8316 |
| 18464 | RNF14     | 2498.403 | 0.126746 | 0.101139 | 1.253185 | 0.210138 | 0.301974 | 2257.248 | 2590.353 | 2315.394 | 2676.32  | 2639.663 | 2511.444 |
| 25892 | LOC103214 | 4.083345 | 0.12671  | 1.202924 | 0.105335 | 0.91611  | 0.94063  | 2.710432 | 4.379295 | 4.87012  | 2.232127 | 4.278221 | 6.029877 |
| 25155 | LOC119615 | 19.05328 | 0.126301 | 0.572062 | 0.220783 | 0.825262 | 0.872176 | 17.88885 | 19.15941 | 18.08902 | 20.08914 | 14.97377 | 24.11951 |
| 25067 | LOC119615 | 22.78733 | 0.126295 | 0.537225 | 0.235088 | 0.81414  | 0.863437 | 18.97302 | 19.70683 | 26.43779 | 31.24978 | 19.252   | 21.10457 |
| 23072 | ZSWIM9    | 209.0494 | 0.126258 | 0.229249 | 0.550744 | 0.581809 | 0.670414 | 152.8684 | 222.2492 | 222.634  | 229.9091 | 241.7195 | 184.9162 |
| 19219 | GDI1      | 13586.94 | 0.126094 | 0.109548 | 1.151037 | 0.249717 | 0.345407 | 12223.51 | 14793.8  | 11967.28 | 13999.9  | 13328.8  | 15208.35 |
| 20262 | MAP2K3    | 1965.779 | 0.125922 | 0.127755 | 0.985656 | 0.324302 | 0.425504 | 2044.75  | 1657.016 | 1944.569 | 1988.825 | 1846.053 | 2313.463 |
| 25383 | LOC103230 | 13.89182 | 0.125871 | 0.684477 | 0.183893 | 0.854097 | 0.894543 | 8.673382 | 15.32753 | 16.00182 | 11.16063 | 17.11289 | 15.07469 |
| 21071 | UBOX5     | 610.3555 | 0.125721 | 0.144531 | 0.869857 | 0.384379 | 0.484965 | 596.8371 | 541.3903 | 618.5052 | 589.2815 | 592.5337 | 723.5852 |
| 19094 | VPS37B    | 1442.862 | 0.125349 | 0.107043 | 1.171022 | 0.24159  | 0.336371 | 1354.674 | 1433.124 | 1356.676 | 1520.078 | 1394.7   | 1597.917 |
| 19492 | RAB11FIP3 | 2034.132 | 0.125281 | 0.113691 | 1.10195  | 0.270483 | 0.368922 | 2084.864 | 1747.886 | 2009.968 | 2029.003 | 2040.712 | 2292.358 |
| 23820 | ULBP3     | 107.6145 | 0.125269 | 0.28845  | 0.434284 | 0.664082 | 0.741168 | 94.86511 | 114.9565 | 96.70666 | 107.1421 | 147.5986 | 84.41828 |
| 22989 | ZDHHC24   | 505.8257 | 0.125137 | 0.221208 | 0.565696 | 0.5716   | 0.661011 | 600.0896 | 321.8781 | 531.5388 | 558.0317 | 438.5177 | 584.8981 |
| 19483 | ZMYM5     | 830.5678 | 0.125023 | 0.1133   | 1.103471 | 0.269823 | 0.368179 | 796.867  | 798.6738 | 786.8722 | 866.0653 | 887.7309 | 847.1977 |
| 23798 | LOC103242 | 91.83099 | 0.125011 | 0.286161 | 0.436856 | 0.662216 | 0.739748 | 93.78094 | 84.84883 | 82.79203 | 109.3742 | 104.8164 | 75.37346 |
| 19321 | ZNF322    | 931.3167 | 0.124991 | 0.110471 | 1.131437 | 0.257871 | 0.354808 | 889.5637 | 911.4407 | 873.1429 | 973.2074 | 947.626  | 992.9197 |
| 25986 | LOC119622 | 3.428829 | 0.124988 | 1.388717 | 0.900002 | 0.928285 | 0.949683 | 4.336691 | 2.737059 | 2.782925 | 6.696381 | 0        | 4.019918 |
| 20747 | ALDH6A1   | 1453.024 | 0.124932 | 0.137166 | 0.910809 | 0.362396 | 0.464371 | 1253.304 | 1647.71  | 1271.797 | 1522.311 | 1398.978 | 1624.047 |
| 21336 | NEK3      | 486.8559 | 0.124916 | 0.151207 | 0.826125 | 0.408733 | 0.509288 | 428.7903 | 523.3257 | 446.6595 | 466.5145 | 526.2212 | 529.6242 |
| 24992 | LOC119622 | 27.33386 | 0.124842 | 0.505661 | 0.246889 | 0.804994 | 0.856305 | 27.10432 | 24.63353 | 25.74206 | 26.78552 | 40.6431  | 19.09461 |
| 21311 | RPRD2     | 1408.225 | 0.124794 | 0.150127 | 0.831258 | 0.405828 | 0.506261 | 1193.132 | 1675.628 | 1174.395 | 1444.186 | 1420.369 | 1541.639 |
| 19526 | ATP5MK    | 2612.594 | 0.124781 | 0.113766 | 1.096818 | 0.272721 | 0.371315 | 2233.938 | 2700.93  | 2559.596 | 2756.677 | 2922.025 | 2502.399 |
| 19651 | NINJ1     | 2067.521 | 0.124664 | 0.115685 | 1.077618 | 0.281204 | 0.38041  | 1827.373 | 2183.078 | 1926.48  | 2261.145 | 1950.869 | 2256.179 |
| 20629 | LMAN2L    | 839.3297 | 0.124647 | 0.133811 | 0.931514 | 0.351588 | 0.453098 | 893.3583 | 760.9024 | 758.3472 | 872.7616 | 797.8883 | 952.7205 |
| 25588 | LOC119622 | 10.10316 | 0.124601 | 0.812749 | 0.153308 | 0.878156 | 0.912372 | 10.29964 | 7.116354 | 11.1317  | 8.928508 | 17.11289 | 6.029877 |
| 16408 | LOC103216 | 18657.02 | 0.124536 | 0.078461 | 1.587236 | 0.112459 | 0.182215 | 18473.76 | 17681.4  | 17403.72 | 19399.42 | 19119.37 | 19864.42 |
| 19191 | COTL1     | 1620.473 | 0.124431 | 0.107672 | 1.155649 | 0.247825 | 0.34331  | 1528.141 | 1596.8   | 1532     | 1696.417 | 1544.438 | 1825.043 |
| 20630 | ZNF256    | 692.0255 | 0.124336 | 0.133544 | 0.931047 | 0.351829 | 0.453387 | 667.8504 | 706.7087 | 615.0265 | 654.0132 | 733.715  | 774.8392 |
| 22621 | ZNF101    | 220.226  | 0.124321 | 0.200052 | 0.621444 | 0.534307 | 0.627937 | 226.05   | 222.2492 | 181.5859 | 256.6946 | 226.7457 | 208.0308 |
| 17338 | NIPSNAP2  | 5194.173 | 0.124283 | 0.086222 | 1.441425 | 0.149465 | 0.22918  | 4995.868 | 4754.819 | 5159.544 | 5372.73  | 5578.801 | 5303.277 |
| 18862 | TTC19     | 1263.632 | 0.124267 | 0.102645 | 1.210654 | 0.226028 | 0.318575 | 1191.506 | 1247.552 | 1188.309 | 1343.74  | 1294.162 | 1316.523 |
| 25360 | LOC103222 | 16.88107 | 0.124218 | 0.658196 | 0.188724 | 0.850309 | 0.891383 | 11.9259  | 24.08612 | 11.82743 | 17.85702 | 23.53022 | 12.05975 |
| 20510 | ISYNA1    | 1401.378 | 0.124136 | 0.131422 | 0.944558 | 0.344884 | 0.447038 | 1443.576 | 1150.66  | 1432.511 | 1502.221 | 1315.553 | 1563.748 |
| 21489 | SLU7      | 2881.943 | 0.124055 | 0.153937 | 0.805881 | 0.420311 | 0.519986 | 2383.554 | 3556.535 | 2332.787 | 3073.639 | 3007.59  | 2937.555 |
| 22992 | ZDHHC15   | 176.3621 | 0.123981 | 0.219446 | 0.564974 | 0.572092 | 0.6615   | 185.9356 | 160.9391 | 158.6268 | 158.481  | 220.3284 | 173.8614 |
| 21177 | MIA3      | 5391.09  | 0.123927 | 0.145097 | 0.854099 | 0.39305  | 0.493401 | 4465.708 | 6546.498 | 4467.987 | 5511.122 | 5459.01  | 5896.215 |
| 25496 | LOC119624 | 12.6056  | 0.123737 | 0.751566 | 0.164639 | 0.869228 | 0.906355 | 16.26259 | 10.94824 | 9.740239 | 11.16063 | 6.417332 | 21.10457 |
| 24964 | LOC119622 | 28.15155 | 0.123608 | 0.489474 | 0.252532 | 0.80063  | 0.852643 | 30.89892 | 19.15941 | 30.61218 | 29.01765 | 32.08666 | 27.13445 |
| 18517 | DYNLL2    | 3679.643 | 0.123573 | 0.098981 | 1.248449 | 0.211867 | 0.304179 | 3403.218 | 3759.624 | 3409.084 | 3754.438 | 3630.071 | 4121.421 |
| 18571 | OSBPL2    | 2574.93  | 0.12355  | 0.099669 | 1.239608 | 0.215121 | 0.307952 | 2431.257 | 2590.353 | 2375.923 | 2743.284 | 2487.786 | 2820.977 |
| 22645 | PAXX      | 509.715  | 0.123545 | 0.200514 | 0.616141 | 0.537802 | 0.631374 | 559.9752 | 363.4814 | 544.0619 | 517.8535 | 442.7959 | 630.1221 |
| 23352 | WNT9A     | 127.8297 | 0.123495 | 0.244177 | 0.505763 | 0.613023 | 0.697894 | 117.0907 | 125.9047 | 121.753  | 145.0883 | 147.5986 | 109.5428 |
| 24474 | TCF7L1    | 66.25166 | 0.123481 | 0.369433 | 0.334246 | 0.738194 | 0.801867 | 51.49821 | 83.75401 | 54.26705 | 53.57105 | 94.12087 | 60.29877 |
| 25616 | HSPB6     | 11.7995  | 0.12337  | 0.833205 | 0.148067 | 0.88229  | 0.915665 | 5.96295  | 17.51718 | 9.740239 | 11.16063 | 21.39111 | 5.024897 |
| 19344 | EFHC1     | 1205.872 | 0.123305 | 0.109346 | 1.127661 | 0.259463 | 0.356569 | 1194.758 | 1155.039 | 1117.345 | 1194.188 | 1234.267 | 1339.638 |
| 25142 | MPV17L    | 23.2741  | 0.123268 | 0.550827 | 0.223787 | 0.822923 | 0.870154 | 28.18849 | 21.34906 | 16.69755 | 20.08914 | 34.22577 | 19.09461 |
| 21171 | KIAA2026  | 2155.809 | 0.123174 | 0.144087 | 0.854854 | 0.392632 | 0.493038 | 1896.218 | 2560.792 | 1733.763 | 2256.68  | 2233.232 | 2254.169 |
| 21187 | PHLDA3    | 1396.606 | 0.12317  | 0.144478 | 0.852521 | 0.393925 | 0.494309 | 1454.418 | 1110.151 | 1450.6   | 1493.293 | 1264.214 | 1606.962 |
| 21155 | CUNH9orf  | 2973.397 | 0.122855 | 0.143218 | 0.85782  | 0.390992 | 0.49135  | 2462.698 | 3569.125 | 2508.112 | 3120.514 | 3084.598 | 3095.337 |
| 23724 | ABCB4     | 119.1098 | 0.122621 | 0.272446 | 0.450073 | 0.652658 | 0.731365 | 123.0536 | 101.8186 | 120.3615 | 102.6778 | 106.9555 | 159.7917 |
| 24937 | LOC103236 | 34.77737 | 0.122565 | 0.477131 | 0.25688  | 0.797272 | 0.849961 | 33.60935 | 36.12918 | 29.22072 | 58.0353  | 23.53022 | 28.13943 |
| 21122 | GOLGB1    | 12350.28 | 0.122531 | 0.142216 | 0.861584 | 0.388916 | 0.489506 | 10218.87 | 14971.17 | 10289.87 | 12533.39 | 12485.99 | 13602.4  |
| 21896 | KIZ       |          |          |          |          |          |          |          |          |          |          |          |          |



|       |           |          |          |          |          |          |          |          |          |          |          |          |          |
|-------|-----------|----------|----------|----------|----------|----------|----------|----------|----------|----------|----------|----------|----------|
| 25960 | LOC119624 | 4.117343 | 0.121781 | 1.294794 | 0.094054 | 0.925066 | 0.947283 | 3.794605 | 4.926706 | 3.478657 | 4.464254 | 0        | 8.039836 |
| 18200 | SACM1L    | 2300.119 | 0.121719 | 0.093472 | 1.3022   | 0.192848 | 0.281696 | 2209.544 | 2287.634 | 2110.849 | 2370.519 | 2451.421 | 2370.747 |
| 23789 | LOC119615 | 112.4204 | 0.121682 | 0.277793 | 0.438031 | 0.661364 | 0.739096 | 130.6428 | 80.46954 | 112.0128 | 118.3027 | 115.512  | 117.5826 |
| 29537 | LOC119623 | 0.653169 | 0.12162  | 3.283699 | 0.037037 | 0.970455 | NA       | 1.084173 | 0        | 0.695731 | 0        | 2.139111 | 0        |
| 25343 | LOC119624 | 1123.078 | 0.121605 | 0.636139 | 0.19116  | 0.8484   | 0.889978 | 517.1504 | 2083.449 | 626.854  | 1120.528 | 1075.973 | 1314.513 |
| 18160 | UBE2G2    | 2480.296 | 0.121496 | 0.092696 | 1.310699 | 0.189959 | 0.278088 | 2348.86  | 2494.556 | 2284.086 | 2584.803 | 2577.628 | 2591.842 |
| 20487 | TOX4      | 3264.352 | 0.121492 | 0.127994 | 0.949198 | 0.34252  | 0.444476 | 2847.038 | 3749.224 | 2785.708 | 3372.744 | 3304.926 | 3526.473 |
| 20821 | TOR1B     | 940.9078 | 0.121227 | 0.134479 | 0.901454 | 0.367347 | 0.469042 | 996.8968 | 800.8635 | 910.7124 | 941.9576 | 917.6785 | 1077.338 |
| 24889 | LOC103241 | 521.615  | 0.121214 | 0.452691 | 0.267763 | 0.788881 | 0.842638 | 294.3529 | 821.1177 | 383.348  | 584.8173 | 530.4994 | 515.5545 |
| 26106 | LOC119615 | 2.075297 | 0.121202 | 1.740376 | 0.069641 | 0.944479 | 0.961809 | 1.626259 | 1.094824 | 3.478657 | 2.232127 | 0        | 4.019918 |
| 27407 | CD200R1L  | 0.668672 | 0.121128 | 3.259762 | 0.037159 | 0.970359 | NA       | 1.084173 | 0        | 0.695731 | 2.232127 | 0        | 0        |
| 27554 | LOC119626 | 0.668672 | 0.121128 | 3.259762 | 0.037159 | 0.970359 | NA       | 1.084173 | 0        | 0.695731 | 2.232127 | 0        | 0        |
| 19595 | LOC119615 | 2142.042 | 0.121088 | 0.111425 | 1.086722 | 0.27716  | 0.376029 | 2044.208 | 2224.134 | 1893.085 | 2145.074 | 2117.72  | 2428.03  |
| 25015 | LOC119621 | 31.46955 | 0.121087 | 0.49819  | 0.243054 | 0.807963 | 0.858673 | 23.30971 | 38.86624 | 27.13352 | 33.4819  | 44.92132 | 21.10457 |
| 18961 | RALGAP2   | 2467.876 | 0.121005 | 0.101413 | 1.193194 | 0.232794 | 0.326397 | 2361.328 | 2489.629 | 2247.212 | 2524.536 | 2427.891 | 2756.659 |
| 22778 | TRIM45    | 245.1646 | 0.120991 | 0.202943 | 0.596179 | 0.551056 | 0.643156 | 279.1745 | 209.6587 | 217.7639 | 252.2303 | 226.7457 | 285.4142 |
| 20498 | ACVR2A    | 1444.421 | 0.12089  | 0.127614 | 0.947307 | 0.343482 | 0.445481 | 1260.893 | 1613.77  | 1275.971 | 1495.525 | 1538.021 | 1482.345 |
| 20506 | LIN54     | 2309.793 | 0.120822 | 0.127884 | 0.944775 | 0.344774 | 0.44696  | 2011.683 | 2633.051 | 1995.358 | 2354.894 | 2391.526 | 2472.249 |
| 20704 | TRMU      | 958.6515 | 0.120778 | 0.13125  | 0.920211 | 0.357462 | 0.459    | 1006.112 | 793.1997 | 958.0221 | 966.511  | 998.9647 | 1029.099 |
| 23056 | TMEM134   | 733.2433 | 0.120673 | 0.218371 | 0.552604 | 0.580534 | 0.669363 | 862.4594 | 451.0673 | 795.9167 | 828.1191 | 626.7594 | 835.1379 |
| 25073 | LOC103238 | 25.0484  | 0.120666 | 0.514752 | 0.234415 | 0.814663 | 0.86379  | 29.27266 | 24.08612 | 18.08902 | 26.78552 | 29.94755 | 22.10955 |
| 20651 | TDRKH     | 584.5225 | 0.120588 | 0.129914 | 0.928214 | 0.353296 | 0.454801 | 583.2849 | 558.3601 | 540.5833 | 604.9064 | 581.8381 | 638.162  |
| 18510 | MRPS21    | 2988.834 | 0.120472 | 0.09642  | 1.249452 | 0.2115   | 0.303746 | 2881.189 | 2657.137 | 3054.261 | 3098.192 | 3150.91  | 3091.317 |
| 18397 | MON2      | 3691.114 | 0.120439 | 0.09521  | 1.26498  | 0.205879 | 0.297509 | 3431.407 | 3739.37  | 3445.957 | 3698.634 | 3737.026 | 4094.286 |
| 18791 | LYPLA1    | 2825.59  | 0.120369 | 0.098723 | 1.219256 | 0.222747 | 0.315124 | 2632.371 | 2804.391 | 2679.957 | 3100.424 | 3028.981 | 2707.415 |
| 20210 | ACBD3     | 5070.371 | 0.120287 | 0.120873 | 0.99515  | 0.319663 | 0.420497 | 4533.468 | 5710.6   | 4335.798 | 5131.66  | 5103.918 | 5606.78  |
| 24308 | LOC103228 | 59.56634 | 0.120128 | 0.33316  | 0.360571 | 0.71842  | 0.785716 | 60.71367 | 52.00412 | 59.13717 | 64.73168 | 53.47777 | 67.33362 |
| 21738 | GID4      | 956.007  | 0.119987 | 0.155565 | 0.771299 | 0.440529 | 0.53878  | 905.8263 | 1060.884 | 786.8722 | 877.2259 | 945.4869 | 1159.746 |
| 21090 | MEI51     | 1283.505 | 0.119876 | 0.138293 | 0.866683 | 0.386035 | 0.486617 | 1093.388 | 1461.042 | 1134.738 | 1426.329 | 1277.049 | 1308.483 |
| 21486 | TMEM1061  | 4293.201 | 0.119613 | 0.14831  | 0.806504 | 0.419952 | 0.519614 | 4588.761 | 3075.907 | 4683.664 | 4392.826 | 4333.838 | 4684.209 |
| 23871 | LOC119621 | 99.54566 | 0.119546 | 0.280012 | 0.426932 | 0.669429 | 0.745539 | 98.11763 | 76.63765 | 112.0128 | 93.74933 | 111.2338 | 105.5228 |
| 22106 | LOC119621 | 559.3052 | 0.119261 | 0.168529 | 0.707659 | 0.479157 | 0.576241 | 593.5846 | 432.4553 | 584.4144 | 616.067  | 511.2474 | 618.0624 |
| 24272 | IZUMO4    | 87.275   | 0.119233 | 0.325686 | 0.366098 | 0.714292 | 0.782364 | 73.72375 | 65.14201 | 112.0128 | 78.12444 | 111.2338 | 83.4133  |
| 20927 | LOC103233 | 1576.118 | 0.11902  | 0.134194 | 0.886925 | 0.375119 | 0.47654  | 1338.411 | 1787.847 | 1409.552 | 1613.828 | 1559.412 | 1747.659 |
| 18157 | RSRP1     | 2961.615 | 0.118968 | 0.090733 | 1.311189 | 0.189794 | 0.277891 | 2909.378 | 2852.016 | 2759.966 | 2941.943 | 3131.658 | 3174.73  |
| 24807 | TRNAA-UG  | 34.72853 | 0.118935 | 0.426002 | 0.279189 | 0.7801   | 0.836012 | 30.35684 | 33.39212 | 36.17803 | 40.17829 | 32.08666 | 36.17926 |
| 19337 | DNAJC14   | 3209.364 | 0.118855 | 0.105288 | 1.12885  | 0.258961 | 0.356026 | 2963.586 | 3392.311 | 2879.632 | 3243.281 | 3225.779 | 3551.597 |
| 23935 | STX1B     | 105.0196 | 0.118792 | 0.284192 | 0.417997 | 0.675949 | 0.750788 | 98.65972 | 118.241  | 85.57496 | 82.5887  | 130.4858 | 114.5677 |
| 25622 | LOC103228 | 11.21541 | 0.118753 | 0.808255 | 0.146926 | 0.883191 | 0.916385 | 14.09425 | 7.116354 | 11.82743 | 4.464254 | 10.69555 | 19.09461 |
| 25814 | LOC119626 | 6.108683 | 0.118587 | 1.002471 | 0.118295 | 0.905834 | 0.932853 | 5.420864 | 3.831883 | 8.348776 | 4.464254 | 8.556443 | 6.029877 |
| 21131 | ERC1      | 3354.805 | 0.118432 | 0.137632 | 0.860498 | 0.389514 | 0.490049 | 2900.704 | 3910.163 | 2844.15  | 3319.173 | 3315.622 | 3839.022 |
| 23780 | LOC119621 | 101.3759 | 0.118358 | 0.268989 | 0.440012 | 0.659929 | 0.737771 | 94.32303 | 102.9134 | 93.228   | 95.98146 | 128.3466 | 93.46309 |
| 25194 | LOC103238 | 27.07509 | 0.1183   | 0.548859 | 0.215538 | 0.829348 | 0.875137 | 27.6464  | 36.67659 | 13.2189  | 24.5534  | 34.22577 | 26.12947 |
| 21635 | INAFM1    | 381.4272 | 0.117593 | 0.149943 | 0.784255 | 0.43289  | 0.531932 | 357.777  | 372.24   | 370.1291 | 374.9973 | 389.3181 | 424.1013 |
| 19686 | SHB       | 2932.893 | 0.11748  | 0.109574 | 1.072146 | 0.283655 | 0.383062 | 2719.647 | 3143.239 | 2579.772 | 3078.103 | 2887.799 | 3188.8   |
| 25439 | LOC119626 | 15.00133 | 0.117407 | 0.67281  | 0.174502 | 0.861471 | 0.900279 | 9.215468 | 19.15941 | 15.30609 | 13.39276 | 12.83466 | 20.09959 |
| 23266 | TMC7      | 138.0312 | 0.117261 | 0.225542 | 0.519907 | 0.603128 | 0.689167 | 142.0266 | 132.4737 | 123.1445 | 140.624  | 141.1813 | 148.737  |
| 25791 | LOC119624 | 7.080354 | 0.11722  | 0.970744 | 0.120752 | 0.903887 | 0.931714 | 8.673382 | 3.831883 | 7.653045 | 4.464254 | 12.83466 | 5.024897 |
| 20328 | KRCC1     | 2625.622 | 0.1171   | 0.120342 | 0.973055 | 0.330526 | 0.432262 | 2376.507 | 2637.43  | 2535.245 | 2928.551 | 2960.529 | 2315.473 |
| 22554 | CACNG7    | 381.2046 | 0.116936 | 0.185129 | 0.631649 | 0.527616 | 0.621915 | 314.9522 | 423.6967 | 356.2145 | 473.2109 | 359.3706 | 359.7826 |
| 20388 | DUSP6     | 7051.558 | 0.116905 | 0.12136  | 0.963292 | 0.335401 | 0.43731  | 6187.916 | 8054.617 | 6055.646 | 7464.233 | 7071.9   | 7475.037 |
| 23350 | LOC119621 | 148.7996 | 0.116842 | 0.230824 | 0.506196 | 0.612719 | 0.697607 | 134.9795 | 166.4132 | 127.3188 | 142.8561 | 160.4333 | 160.7967 |
| 18084 | ZDHC6     | 3496.438 | 0.116822 | 0.088156 | 1.325179 | 0.185112 | 0.27213  | 3318.653 | 3453.621 | 3288.722 | 3765.598 | 3638.627 | 3513.408 |
| 19413 | DNAJB12   | 2314.846 | 0.116804 | 0.104626 | 1.116398 | 0.264252 | 0.361878 | 2117.389 | 2369.746 | 2181.814 | 2352.662 | 2269.596 | 2597.872 |
| 24253 | LOC103238 | 64.67159 | 0.116697 | 0.317205 | 0.367891 | 0.712955 | 0.781475 | 58.54533 | 66.23683 | 61.22436 | 73.66019 | 62.03421 | 66.32864 |
| 21487 | TTL3      | 533.552  | 0.116627 | 0.144614 | 0.806466 | 0.419974 | 0.519617 | 567.0223 | 458.7311 | 509.2754 | 578.1209 | 545.4732 | 542.6889 |
| 24945 | ZDHC22    | 44.80983 | 0.116443 | 0.454552 | 0.256171 | 0.797819 | 0.850271 | 36.31979 | 44.34036 | 46.614   | 46.87467 | 70.59065 | 24.11951 |
| 19996 | PTBP2     | 1141.962 | 0.116263 | 0.112859 | 1.030164 | 0.302933 | 0.402736 | 1074.415 | 1171.461 | 1038.727 | 1241.063 | 1191.485 | 1134.622 |
| 19497 | INTS14    | 1743.252 | 0.116249 | 0.105556 | 1.101304 | 0.270764 | 0.369199 | 1682.094 | 1773.067 | 1566.091 | 1705.345 | 1854.609 | 1878.307 |
| 20365 | TIMM13    | 1408.095 | 0.116075 | 0.120051 | 0.966885 | 0.333602 | 0.435492 | 1444.66  | 1183.504 | 1424.162 | 1495.525 | 1503.795 | 1396.921 |
| 20830 | FRMD4A    | 4357.922 | 0.116057 | 0.128874 | 0.900543 | 0.367831 | 0.469457 | 3763.164 | 5051.516 | 3734.686 | 4522.289 | 4359.508 | 4716.369 |
| 23474 | TMEM139   | 139.5929 | 0.116011 | 0.237452 | 0.488566 | 0.625149 | 0.708026 | 143.1108 | 145.6115 | 112.0128 | 142.8561 | 158.2942 | 135.6722 |
| 21481 | MINDY2    | 458.2349 | 0.115955 | 0.143671 | 0.807092 | 0.419614 | 0.519324 | 440.7162 | 471.869  | 406.3071 | 488.8358 | 466.3261 | 475.3553 |
| 17814 | CAP1      | 12926.56 | 0.115887 | 0.08431  | 1.374537 | 0.169275 | 0.25262  | 12151.41 | 13136.79 | 11937.36 | 13314.64 | 13187.62 | 13831.53 |
| 22670 | SPESP1    | 322.2748 | 0.11582  | 0.189374 | 0.611594 | 0.540806 | 0.634201 | 285.1374 | 367.8607 | 272.7267 | 323.6584 | 380.7617 | 303.5038 |
| 25027 | LOC103228 | 31.7609  | 0.115775 | 0.480574 | 0.24091  | 0.809625 | 0.860019 | 33.60935 | 25.18094 | 32.00364 | 49.10679 | 23.53022 | 27.13445 |
| 23410 | LOC103228 | 126.0872 | 0.115682 | 0.232585 | 0.497375 | 0.618925 | 0.702867 | 122.5115 | 122.6202 | 117.5786 | 124.9991 | 141.1813 | 127.6324 |
| 22431 | LOC103224 | 293.5699 | 0.115658 | 0.177493 | 0.651621 | 0.514646 | 0.609912 | 268.8748 | 312.0247 | 262.9865 | 285.7123 | 344.3968 | 287.4241 |
| 21064 | NTAN1     | 795.2725 | 0.115654 | 0.132829 | 0.870695 | 0.383921 | 0.484549 | 710.1331 | 844.6564 | 738.171  | 837.0476 | 757.2452 | 884.3819 |
| 26066 | PCDH19    | 2.704102 | 0.115554 | 1.525464 | 0.07575  | 0.939618 | 0.958361 | 0.542086 | 4.379295 | 2.782925 | 2.232127 |          |          |



|       |           |          |          |          |          |          |          |          |          |          |           |          |           |
|-------|-----------|----------|----------|----------|----------|----------|----------|----------|----------|----------|-----------|----------|-----------|
| 21298 | SOS1      | 1303.382 | 0.115249 | 0.138182 | 0.834037 | 0.40426  | 0.504593 | 1144.886 | 1483.486 | 1125.693 | 1256.687  | 1441.761 | 1367.777  |
| 20176 | SNAPC4    | 1108.72  | 0.115119 | 0.115044 | 1.000646 | 0.316998 | 0.417753 | 1078.752 | 1032.966 | 1084.645 | 1205.349  | 1039.608 | 1211      |
| 20661 | UPRT      | 780.9203 | 0.115065 | 0.124092 | 0.927253 | 0.353795 | 0.455265 | 745.3688 | 767.4714 | 735.3881 | 752.2268  | 894.1483 | 790.9188  |
| 19977 | KIAA0754  | 11676.47 | 0.114971 | 0.111223 | 1.033702 | 0.301275 | 0.400931 | 10559.3  | 12657.26 | 10422.75 | 12044.56  | 11138.35 | 13236.58  |
| 21240 | RASSF8    | 9216.483 | 0.114828 | 0.136032 | 0.844124 | 0.3986   | 0.498907 | 7750.209 | 11028.71 | 7771.319 | 9520.022  | 9360.748 | 9867.893  |
| 25007 | LOC103232 | 35.22874 | 0.114661 | 0.469098 | 0.244428 | 0.806899 | 0.857816 | 44.45108 | 31.74989 | 24.3506  | 33.4819   | 49.19955 | 28.13943  |
| 20450 | STARD9    | 1581.757 | 0.114285 | 0.119787 | 0.954072 | 0.340047 | 0.442062 | 1494.532 | 1668.511 | 1399.116 | 1517.846  | 1608.611 | 1801.928  |
| 22441 | ZNF225    | 309.8464 | 0.114245 | 0.175648 | 0.650424 | 0.515419 | 0.610607 | 290.5583 | 335.016  | 269.248  | 301.3371  | 310.171  | 352.7478  |
| 19946 | JAK2      | 2150.064 | 0.11421  | 0.109958 | 1.038666 | 0.29896  | 0.398469 | 1990.541 | 2299.677 | 1906.304 | 2229.895  | 2160.502 | 2313.463  |
| 28689 | CDX4      | 0.654944 | 0.113946 | 3.281115 | 0.034728 | 0.972297 | NA       | 0        | 1.094824 | 0.695731 | 0         | 2.139111 | 0         |
| 19078 | ACTN4     | 15859.48 | 0.113917 | 0.097148 | 1.172611 | 0.240952 | 0.335764 | 15046.69 | 15544.31 | 15117.55 | 16575.77  | 14809.06 | 18063.5   |
| 19235 | ANAPC13   | 2462.88  | 0.113914 | 0.099254 | 1.147703 | 0.251091 | 0.347037 | 2494.681 | 2181.983 | 2422.537 | 2517.839  | 2541.263 | 2618.976  |
| 25235 | TRNAL-CA  | 35.66469 | 0.113793 | 0.5427   | 0.20968  | 0.833917 | 0.878529 | 53.66655 | 14.23271 | 35.4823  | 29.01765  | 36.36488 | 45.22408  |
| 20606 | SERTAD3   | 1133.638 | 0.11378  | 0.121533 | 0.936207 | 0.349166 | 0.450494 | 1138.923 | 979.3197 | 1152.827 | 1127.224  | 1142.285 | 1261.249  |
| 19142 | RASA2     | 2666.506 | 0.113625 | 0.097745 | 1.162465 | 0.245047 | 0.340328 | 2448.062 | 2770.999 | 2464.976 | 2752.213  | 2800.096 | 2762.689  |
| 20035 | KIAA1191  | 2941.992 | 0.11356  | 0.111112 | 1.022027 | 0.306768 | 0.407059 | 2649.718 | 3157.471 | 2673     | 3187.477  | 2823.626 | 3160.66   |
| 24343 | LOC119615 | 93.28464 | 0.113549 | 0.319403 | 0.355503 | 0.722213 | 0.788758 | 123.0536 | 68.42648 | 77.92191 | 98.21359  | 85.56443 | 106.5278  |
| 20019 | CDH24     | 1233.974 | 0.113292 | 0.110532 | 1.024973 | 0.305376 | 0.405536 | 1154.644 | 1181.315 | 1224.487 | 1308.026  | 1178.65  | 1356.722  |
| 21968 | WDR13     | 1477.403 | 0.113268 | 0.154462 | 0.733309 | 0.46337  | 0.560756 | 1613.249 | 1115.078 | 1534.088 | 1508.918  | 1377.587 | 1715.5    |
| 22797 | LOC103242 | 214.3267 | 0.113214 | 0.190848 | 0.593216 | 0.553037 | 0.644931 | 214.6662 | 206.3743 | 198.2834 | 196.4272  | 231.024  | 239.1851  |
| 20893 | MID2      | 1067.629 | 0.113061 | 0.126875 | 0.891124 | 0.372863 | 0.474423 | 977.3817 | 1149.565 | 953.8477 | 1069.189  | 1058.86  | 1196.931  |
| 24821 | LOC119620 | 54.22761 | 0.112977 | 0.407154 | 0.27748  | 0.781411 | 0.836966 | 66.67662 | 30.65506 | 58.44144 | 64.73168  | 55.61688 | 49.24399  |
| 19373 | PLS3      | 4627.037 | 0.1127   | 0.100283 | 1.123821 | 0.261089 | 0.358285 | 4408.788 | 4802.991 | 4131.253 | 4796.841  | 4522.08  | 5100.77   |
| 21320 | HEG1      | 2563.958 | 0.112466 | 0.135504 | 0.829984 | 0.406548 | 0.506946 | 2186.234 | 2959.856 | 2249.3   | 2616.053  | 2474.951 | 2897.356  |
| 21069 | PIAS3     | 691.5897 | 0.112344 | 0.12909  | 0.870275 | 0.38415  | 0.484723 | 648.3353 | 714.3724 | 633.8113 | 714.2806  | 675.959  | 762.7794  |
| 20697 | LRP11     | 6313.101 | 0.112131 | 0.121575 | 0.922315 | 0.356364 | 0.457745 | 5605.173 | 7203.939 | 5396.093 | 6395.044  | 6434.445 | 6843.91   |
| 21186 | ANKRD29   | 658.539  | 0.112118 | 0.131511 | 0.852542 | 0.393913 | 0.494309 | 634.2411 | 656.3468 | 611.5479 | 613.8349  | 701.6283 | 733.635   |
| 23272 | PKP3      | 470.417  | 0.11207  | 0.216147 | 0.51849  | 0.604117 | 0.690119 | 540.4601 | 315.8566 | 503.7095 | 450.8897  | 425.683  | 585.903   |
| 19613 | RMC1      | 1709.999 | 0.111758 | 0.103122 | 1.08375  | 0.278476 | 0.377468 | 1633.848 | 1690.955 | 1611.314 | 1763.38   | 1662.089 | 1898.406  |
| 20335 | MSH6      | 5401.852 | 0.111711 | 0.114982 | 0.971559 | 0.33127  | 0.433086 | 4958.464 | 6012.771 | 4608.525 | 5444.158  | 5572.383 | 5814.811  |
| 20609 | RANBP2    | 17248.75 | 0.11171  | 0.119411 | 0.935514 | 0.349523 | 0.450875 | 15341.59 | 19619.24 | 14785.68 | 17336.93  | 17371.72 | 19037.33  |
| 24764 | LOC103242 | 62.00367 | 0.111679 | 0.387813 | 0.287971 | 0.773369 | 0.830238 | 42.82482 | 88.1333  | 48.00546 | 66.96381  | 57.75599 | 68.3386   |
| 23908 | DNASE1    | 94.37601 | 0.111651 | 0.26487  | 0.421534 | 0.673365 | 0.748763 | 91.6126  | 94.15483 | 86.96642 | 93.74933  | 96.25998 | 103.5129  |
| 21102 | EFCA87    | 733.327  | 0.111537 | 0.128986 | 0.864472 | 0.387192 | 0.487798 | 662.4295 | 774.0403 | 679.0338 | 725.4413  | 787.1927 | 771.8242  |
| 20352 | VANGL1    | 2213.069 | 0.111378 | 0.114989 | 0.9686   | 0.332745 | 0.434651 | 2046.918 | 2354.418 | 1985.617 | 2314.716  | 2098.468 | 2478.279  |
| 21713 | SLC45A3   | 694.8521 | 0.111369 | 0.143509 | 0.776042 | 0.437724 | 0.535941 | 742.1162 | 576.9721 | 686.6869 | 741.0662  | 669.5416 | 752.7296  |
| 23742 | LOC119622 | 141.2976 | 0.111229 | 0.24924  | 0.446274 | 0.6554   | 0.733881 | 130.6428 | 147.8012 | 129.406  | 109.3742  | 181.8244 | 148.737   |
| 25866 | LOC103222 | 6.509264 | 0.111178 | 1.020902 | 0.108902 | 0.91328  | 0.938667 | 8.673382 | 6.568942 | 3.478657 | 11.16063  | 2.139111 | 7.034856  |
| 21521 | GPR160    | 942.102  | 0.111109 | 0.138663 | 0.801283 | 0.422968 | 0.522494 | 861.9173 | 1049.388 | 802.874  | 1006.689  | 1018.217 | 913.5263  |
| 20275 | TTG33     | 1007.902 | 0.111013 | 0.112865 | 0.983599 | 0.325313 | 0.426557 | 1033.759 | 939.9061 | 932.28   | 1049.1    | 1065.277 | 1027.089  |
| 21296 | LRRC41    | 4278.037 | 0.110681 | 0.132666 | 0.834286 | 0.40412  | 0.504486 | 4553.526 | 3592.116 | 4204.305 | 4100.417  | 3997.998 | 5219.863  |
| 27253 | LOC119625 | 0.654057 | 0.110608 | 2.966435 | 0.037287 | 0.970256 | NA       | 0.542086 | 0.547412 | 0.695731 | 0         | 2.139111 | 0         |
| 27439 | MDFIC2    | 0.654057 | 0.110608 | 2.966435 | 0.037287 | 0.970256 | NA       | 0.542086 | 0.547412 | 0.695731 | 0         | 2.139111 | 0         |
| 20733 | TMOD3     | 3530.347 | 0.11057  | 0.121076 | 0.913234 | 0.361119 | 0.463047 | 3125.128 | 3985.705 | 3075.828 | 3493.279  | 3711.357 | 3790.783  |
| 20598 | HIBCH     | 960.5192 | 0.110517 | 0.117902 | 0.937357 | 0.348575 | 0.449892 | 950.2774 | 908.7036 | 916.9739 | 917.4042  | 990.4082 | 1079.348  |
| 21868 | RHBDF1    | 1153.16  | 0.110493 | 0.147291 | 0.75017  | 0.453153 | 0.550899 | 1219.694 | 911.9881 | 1200.137 | 1142.849  | 1101.642 | 1342.653  |
| 20273 | APLP2     | 38962.21 | 0.110272 | 0.112068 | 0.983974 | 0.325128 | 0.426357 | 34865.37 | 43595.88 | 33962.82 | 39972.93  | 38850.53 | 42525.71  |
| 19951 | PMM2      | 1784.331 | 0.110179 | 0.106185 | 1.037613 | 0.29945  | 0.399022 | 1800.269 | 1590.779 | 1761.592 | 1837.041  | 1762.627 | 1953.68   |
| 17966 | ANXA4     | 14747.6  | 0.110049 | 0.081598 | 1.348675 | 0.177441 | 0.262554 | 13898.55 | 13798.61 | 14862.91 | 15227.57  | 14978.05 | 15719.89  |
| 19721 | MFAP3     | 1807.259 | 0.110036 | 0.103242 | 1.065803 | 0.286513 | 0.386235 | 1712.451 | 1811.386 | 1695.497 | 1881.683  | 1747.653 | 1994.884  |
| 21456 | DNAJC27   | 751.9114 | 0.110004 | 0.135784 | 0.810136 | 0.417862 | 0.517727 | 734.527  | 765.2817 | 674.8594 | 705.3521  | 755.1061 | 876.3421  |
| 20255 | NFKB1     | 2239.475 | 0.109914 | 0.111392 | 0.986737 | 0.323771 | 0.424934 | 2185.15  | 2247.125 | 2036.406 | 2299.091  | 2096.328 | 2572.747  |
| 19968 | EPS15     | 8010.625 | 0.109405 | 0.105701 | 1.035046 | 0.300647 | 0.400276 | 7344.186 | 8732.861 | 7045.672 | 8301.28   | 8028.082 | 8611.669  |
| 20649 | CUNH140r  | 1429.34  | 0.109366 | 0.117796 | 0.928429 | 0.353185 | 0.454708 | 1386.657 | 1265.069 | 1471.472 | 1419.633  | 1634.281 | 1398.931  |
| 24103 | LOC103230 | 117.0719 | 0.109326 | 0.280511 | 0.389738 | 0.696731 | 0.768476 | 127.9324 | 79.92212 | 130.1018 | 1127.2312 | 117.6511 | 119.592   |
| 19273 | JUN       | 10555.1  | 0.109284 | 0.095838 | 1.140302 | 0.25416  | 0.350587 | 9817.184 | 10860.1  | 9794.506 | 11022.24  | 10126.55 | 11710.026 |
| 21277 | ZNF84     | 1195.207 | 0.109259 | 0.13021  | 0.839098 | 0.401414 | 0.501555 | 1081.462 | 1313.788 | 1054.033 | 1151.778  | 1339.083 | 1231.1    |
| 22683 | INPP1     | 305.6596 | 0.109041 | 0.178763 | 0.609979 | 0.541876 | 0.635091 | 273.7536 | 310.3825 | 297.773  | 272.3195  | 372.2053 | 307.5237  |
| 19769 | UBE2E3    | 1920.567 | 0.108739 | 0.102786 | 1.057921 | 0.290091 | 0.39011  | 1953.679 | 1718.326 | 1875.692 | 1964.272  | 1940.173 | 2071.263  |
| 25044 | LOC119620 | 30.99279 | 0.108568 | 0.455508 | 0.238344 | 0.811614 | 0.861554 | 26.02015 | 29.56024 | 33.39511 | 33.4819   | 36.36488 | 27.13445  |
| 21235 | SPART     | 1291.414 | 0.108558 | 0.128458 | 0.845083 | 0.398064 | 0.49833  | 1115.614 | 1435.314 | 1175.786 | 1395.079  | 1326.249 | 1300.443  |
| 20457 | SLC2A1    | 8527.391 | 0.108489 | 0.11387  | 0.952743 | 0.34072  | 0.442785 | 8711.328 | 7429.473 | 8487.923 | 8611.546  | 7927.544 | 9996.531  |
| 20780 | TRAM2     | 1398.482 | 0.10837  | 0.119503 | 0.90684  | 0.364492 | 0.466314 | 1334.617 | 1387.142 | 1323.281 | 1386.151  | 1315.553 | 1644.146  |
| 21856 | D2HGDH    | 1955.027 | 0.108172 | 0.143916 | 0.751637 | 0.45227  | 0.550128 | 2107.09  | 1507.572 | 2035.014 | 1973.2    | 1863.165 | 2244.119  |
| 21799 | APC       | 2999.904 | 0.108165 | 0.142372 | 0.759737 | 0.447412 | 0.545617 | 2545.638 | 3595.401 | 2522.026 | 3171.852  | 2945.555 | 3218.949  |
| 18973 | ABCD3     | 3077.004 | 0.108104 | 0.090874 | 1.189609 | 0.2342   | 0.328162 | 3080.677 | 2986.131 | 2819.104 | 3116.049  | 3230.057 | 3230.004  |
| 20970 | MRTFB     | 1570.73  | 0.107992 | 0.122303 | 0.828989 | 0.377242 | 0.478254 | 1433.818 | 1716.683 | 1387.288 | 1513.382  | 1672.785 | 1700.425  |
| 22026 | LARP1B    | 2057.353 | 0.107876 | 0.149465 | 0.721748 | 0.47045  | 0.567824 | 1789.427 | 2473.207 | 1676.017 | 2113.824  | 2286.709 | 2004.934  |
| 20585 | ZBTB7B    | 2336.982 | 0.107309 | 0.114198 | 0.939678 | 0.347383 | 0.448636 | 2343.439 | 2062.648 | 2350.876 | 2377.215  | 2205.423 | 2682.29   |
| 25225 | CACNA2D2  | 32.71301 | 0.107197 | 0.508675 | 0.210739 | 0.833091 | 0.878057 | 22.76763 | 32.84471 | 37.56949 | 37.94616  | 47.06043 | 18.08963  |
| 21242 | ERCC      |          |          |          |          |          |          |          |          |          |           |          |           |



|         |           |          |          |          |          |          |          |          |          |          |          |          |          |
|---------|-----------|----------|----------|----------|----------|----------|----------|----------|----------|----------|----------|----------|----------|
| 21127   | LOC103220 | 858.7183 | 0.106657 | 0.123869 | 0.861046 | 0.389213 | 0.489763 | 828.8501 | 851.7728 | 802.1783 | 946.4218 | 791.4709 | 931.616  |
| 20591   | STIL      | 2224.744 | 0.106541 | 0.113485 | 0.938813 | 0.347827 | 0.449067 | 2061.012 | 2420.108 | 1948.048 | 2272.305 | 2263.179 | 2383.811 |
| 21816   | RHOG      | 1033.081 | 0.106466 | 0.140512 | 0.757702 | 0.448629 | 0.546675 | 1036.469 | 896.1131 | 1058.903 | 1026.778 | 939.0696 | 1241.15  |
| 25731   | LOC119624 | 9.853149 | 0.106464 | 0.820033 | 0.129829 | 0.896701 | 0.926462 | 14.63633 | 6.02153  | 7.653045 | 8.928508 | 12.83466 | 9.044815 |
| 19799   | RUFY3     | 2529.201 | 0.106356 | 0.100931 | 1.053749 | 0.291998 | 0.392079 | 2500.644 | 2582.689 | 2225.645 | 2593.732 | 2586.185 | 2686.31  |
| 17860   | SSR2      | 9191.673 | 0.106246 | 0.077696 | 1.367453 | 0.171483 | 0.255257 | 8864.738 | 8817.162 | 8879.619 | 9611.539 | 9337.218 | 9639.773 |
| 20698   | ARF3      | 8536.93  | 0.106065 | 0.115026 | 0.922098 | 0.356478 | 0.457824 | 7738.825 | 9418.22  | 7517.377 | 8680.742 | 8224.881 | 9641.763 |
| 19364   | VPS13C    | 14157.62 | 0.10596  | 0.094151 | 1.125423 | 0.26041  | 0.357519 | 13020.37 | 14914.23 | 12983.04 | 14267.76 | 14361.99 | 15398.3  |
| 21059   | EMC7      | 2332.193 | 0.105904 | 0.121511 | 0.871556 | 0.383451 | 0.48407  | 2070.228 | 2616.081 | 2051.016 | 2462.036 | 2464.255 | 2329.542 |
| 24164   | MCMD2C    | 87.34117 | 0.105847 | 0.278159 | 0.380527 | 0.703555 | 0.774009 | 84.02339 | 90.32295 | 77.22618 | 98.21359 | 89.84265 | 84.41828 |
| 20146   | ATRAID    | 2281.954 | 0.105811 | 0.105361 | 1.004275 | 0.315246 | 0.416004 | 2210.086 | 2001.885 | 2382.88  | 2319.18  | 2447.143 | 2330.547 |
| 19503   | MAP2K4    | 2038.95  | 0.10581  | 0.096123 | 1.100778 | 0.270993 | 0.369397 | 1972.652 | 1918.131 | 2005.098 | 2140.61  | 2004.347 | 2192.865 |
| 22708   | LOC103242 | 269.4094 | 0.10575  | 0.174088 | 0.607452 | 0.543551 | 0.636353 | 273.2115 | 252.3568 | 251.159  | 274.5516 | 305.8928 | 259.2847 |
| 22987   | HILPDA    | 334.63   | 0.105684 | 0.186688 | 0.566099 | 0.571327 | 0.660753 | 367.5346 | 260.0206 | 338.8212 | 379.4616 | 327.2839 | 334.6582 |
| 20486   | ZBED1     | 1696.429 | 0.105632 | 0.111286 | 0.949192 | 0.342523 | 0.444476 | 1689.683 | 1548.628 | 1671.147 | 1709.809 | 1625.724 | 1933.58  |
| 21971   | TDRD3     | 965.1397 | 0.105591 | 0.144227 | 0.732116 | 0.464098 | 0.56156  | 864.6278 | 1110.151 | 814.0057 | 966.511  | 1039.608 | 995.9347 |
| 20681   | USP11     | 4301.391 | 0.105479 | 0.114106 | 0.924394 | 0.355281 | 0.456707 | 4129.072 | 4222.735 | 4090.205 | 4218.72  | 3983.024 | 5164.589 |
| 20967   | MEGF8     | 4628.33  | 0.105355 | 0.119289 | 0.88319  | 0.377134 | 0.478185 | 4748.135 | 3929.322 | 4708.014 | 4631.663 | 4353.09  | 5399.755 |
| 23821   | LEF1      | 178.3059 | 0.105347 | 0.242629 | 0.43419  | 0.66415  | 0.741213 | 146.3633 | 207.4691 | 159.3225 | 229.9091 | 168.9897 | 157.7818 |
| 25781   | LOC103215 | 8.534303 | 0.105228 | 0.862298 | 0.122033 | 0.902873 | 0.930994 | 4.878777 | 8.758589 | 11.1317  | 6.696381 | 10.69555 | 9.044815 |
| 19774   | CSK       | 2087.145 | 0.105084 | 0.099389 | 1.057297 | 0.290376 | 0.390394 | 1994.336 | 2082.902 | 1961.267 | 2113.824 | 2062.103 | 2308.438 |
| 21304   | CC2D1A    | 1552.381 | 0.104994 | 0.126091 | 0.832685 | 0.405022 | 0.505423 | 1567.172 | 1375.646 | 1550.089 | 1660.702 | 1381.865 | 1778.814 |
| 19496   | YIPF4     | 2245.773 | 0.104948 | 0.095291 | 1.101346 | 0.270746 | 0.369193 | 2274.594 | 2059.363 | 2159.55  | 2305.787 | 2316.657 | 2358.687 |
| 21763   | CC2D2A    | 559.9143 | 0.104881 | 0.136932 | 0.765938 | 0.443713 | 0.542026 | 535.5813 | 582.4462 | 502.318  | 553.5675 | 577.5599 | 608.0126 |
| 19331   | PSMA6     | 6015.93  | 0.104757 | 0.092724 | 1.129768 | 0.258574 | 0.355604 | 5925.004 | 5330.149 | 6136.351 | 6252.188 | 6361.715 | 6090.176 |
| 26022   | LOC119624 | 4.467776 | 0.104676 | 1.265953 | 0.082686 | 0.934102 | 0.954311 | 3.252518 | 4.379295 | 4.87012  | 11.16063 | 2.139111 | 1.004979 |
| 22249   | ZNF695    | 385.1513 | 0.104669 | 0.152994 | 0.684138 | 0.493888 | 0.59014  | 396.2651 | 367.8607 | 348.5614 | 379.4616 | 427.8221 | 390.937  |
| 25575   | LOC119620 | 14.34087 | 0.104643 | 0.675114 | 0.155    | 0.876821 | 0.911463 | 15.17842 | 13.13788 | 12.52316 | 22.32127 | 12.83466 | 10.04979 |
| 23779   | YPEL1     | 121.3192 | 0.104482 | 0.237409 | 0.440092 | 0.65987  | 0.737767 | 111.1277 | 116.5987 | 123.8402 | 122.767  | 121.9293 | 131.6523 |
| 25594   | LOC119621 | 16.86475 | 0.10423  | 0.682617 | 0.152692 | 0.878641 | 0.912662 | 17.88885 | 10.94824 | 19.48048 | 31.24978 | 8.556443 | 13.06473 |
| 22334   | TRIP11    | 5199.91  | 0.104209 | 0.155712 | 0.669244 | 0.50334  | 0.599159 | 4259.715 | 6556.351 | 4220.306 | 5200.856 | 5508.21  | 5454.024 |
| 26135   | LOC119624 | 2.391695 | 0.104008 | 1.57935  | 0.065855 | 0.947493 | 0.963808 | 2.168345 | 1.094824 | 3.478657 | 4.464254 | 2.139111 | 1.004979 |
| 20888   | KLF11     | 1429.104 | 0.103908 | 0.116499 | 0.891922 | 0.372435 | 0.474013 | 1293.418 | 1546.438 | 1293.365 | 1450.883 | 1493.099 | 1497.419 |
| 18926   | EIF5A2    | 3044.75  | 0.103827 | 0.086578 | 1.199239 | 0.230435 | 0.323688 | 2888.236 | 2961.498 | 258.25   | 3122.746 | 3118.823 | 3218.949 |
| 22837   | ZNF597    | 328.4355 | 0.103698 | 0.176462 | 0.587653 | 0.556765 | 0.648141 | 319.2889 | 353.0806 | 278.2925 | 363.8367 | 297.3364 | 358.7777 |
| 21158   | FAM83G    | 1362.093 | 0.103696 | 0.120975 | 0.857169 | 0.391351 | 0.491733 | 1340.038 | 1266.164 | 1340.674 | 1339.276 | 1283.466 | 1602.942 |
| 21243   | LOC103235 | 1295.281 | 0.103694 | 0.123022 | 0.842889 | 0.399929 | 0.4997   | 1169.28  | 1353.202 | 1227.966 | 1370.526 | 1191.485 | 1459.23  |
| 19541   | SBDS      | 4804.792 | 0.103651 | 0.09492  | 1.091981 | 0.274841 | 0.373914 | 4501.485 | 4837.478 | 4551.475 | 5008.893 | 5313.551 | 4615.871 |
| 21018   | MED15     | 1390.667 | 0.103618 | 0.11806  | 0.877672 | 0.380122 | 0.480804 | 1359.553 | 1302.84  | 1367.112 | 1372.758 | 1317.692 | 1624.047 |
| 25907   | LOC119615 | 6.787245 | 0.103599 | 0.997436 | 0.103865 | 0.917276 | 0.941288 | 4.336691 | 9.853413 | 5.565851 | 2.232127 | 10.69555 | 8.039836 |
| 20056   | TRIM56    | 1992.235 | 0.103542 | 0.10157  | 1.019411 | 0.308008 | 0.408276 | 1952.595 | 1915.941 | 1900.042 | 1946.415 | 2004.347 | 2234.069 |
| 18829   | ARFGAP3   | 4082.631 | 0.103517 | 0.085263 | 1.214092 | 0.224713 | 0.317261 | 3970.783 | 3900.857 | 3941.318 | 4133.899 | 4154.153 | 4394.775 |
| 20095   | LOC103240 | 4866.224 | 0.103357 | 0.101984 | 1.01346  | 0.31084  | 0.411211 | 4662.485 | 4997.87  | 4422.069 | 4886.126 | 4712.461 | 5516.332 |
| 25684   | LOC119620 | 16.005   | 0.103286 | 0.749218 | 0.137858 | 0.890352 | 0.921586 | 22.76763 | 12.04306 | 10.43597 | 20.08914 | 25.66933 | 5.024897 |
| 21895   | MCEE      | 490.2519 | 0.103212 | 0.13856  | 0.744889 | 0.456339 | 0.554089 | 457.5209 | 459.8259 | 503.0138 | 488.8358 | 502.691  | 529.6242 |
| 25618   | GABRB2    | 20.12099 | 0.103164 | 0.697917 | 0.147817 | 0.882487 | 0.915797 | 8.131296 | 26.27577 | 22.95914 | 20.08914 | 34.22577 | 9.044815 |
| 21077   | PPM1F     | 6352.732 | 0.103161 | 0.118711 | 0.86901  | 0.384842 | 0.485411 | 6579.844 | 5460.433 | 6344.374 | 6406.204 | 5867.581 | 7457.953 |
| 22161   | RAB4B     | 498.9224 | 0.103085 | 0.147651 | 0.698165 | 0.485074 | 0.581909 | 478.1202 | 486.6491 | 483.5333 | 462.0503 | 496.2737 | 586.908  |
| 23086   | MTRF1     | 245.9472 | 0.103083 | 0.187837 | 0.54879  | 0.58315  | 0.671542 | 223.3396 | 248.525  | 240.7231 | 214.2842 | 284.5017 | 264.3096 |
| 21302   | KMT2D     | 1827.98  | 0.102904 | 0.123505 | 0.833192 | 0.404736 | 0.505113 | 1645.377 | 1976.157 | 1671.842 | 1720.97  | 1856.748 | 2096.384 |
| 22898   | ZNF671    | 304.5222 | 0.102891 | 0.177538 | 0.579543 | 0.562223 | 0.652751 | 306.8209 | 304.9084 | 271.3352 | 363.391  | 337.9795 | 342.698  |
| 24706   | LOC103231 | 70.60847 | 0.102853 | 0.345535 | 0.297664 | 0.76596  | 0.824214 | 59.08741 | 91.41777 | 52.87558 | 73.66019 | 81.28621 | 65.32367 |
| 24786   | LOC103244 | 50.49633 | 0.102818 | 0.362352 | 0.283752 | 0.776601 | 0.832967 | 42.82482 | 49.81448 | 52.87558 | 51.33892 | 59.8951  | 46.22906 |
| 23324   | FUOM      | 877.1824 | 0.102804 | 0.201423 | 0.510388 | 0.60978  | 0.695035 | 1003.402 | 556.7178 | 979.5898 | 930.797  | 810.7229 | 981.8649 |
| 24394   | MEI1      | 94.48034 | 0.102761 | 0.295618 | 0.347616 | 0.728129 | 0.793527 | 113.2961 | 75.54283 | 83.48776 | 93.74933 | 113.3729 | 87.43321 |
| 19992   | ELF2      | 2533.974 | 0.102597 | 0.099513 | 1.03099  | 0.302545 | 0.402314 | 2384.638 | 2614.439 | 2329.309 | 2591.499 | 2759.459 | 2524.508 |
| 25774   | LOC119620 | 9.475397 | 0.102506 | 0.83392  | 0.12292  | 0.90217  | 0.930553 | 9.757555 | 8.211177 | 9.044508 | 6.696381 | 17.11289 | 6.029877 |
| 19450   | BIN1      | 2771.52  | 0.102497 | 0.092318 | 1.110264 | 0.266885 | 0.364803 | 2716.395 | 2611.702 | 2695.959 | 2841.498 | 2746.618 | 3016.948 |
| 23738   | LOC119621 | 137.2612 | 0.102455 | 0.229135 | 0.447139 | 0.654775 | 0.733304 | 127.9324 | 141.7797 | 125.9274 | 149.5525 | 149.7377 | 128.6374 |
| 19684   | FAM91A1   | 6683.051 | 0.102409 | 0.095507 | 1.072271 | 0.283598 | 0.383025 | 6050.768 | 7034.242 | 6256.016 | 6801.291 | 6755.311 | 7200.678 |
| 24700   | SARDH     | 65.8179  | 0.102371 | 0.342148 | 0.299201 | 0.764787 | 0.823152 | 67.7608  | 53.64636 | 67.48594 | 69.19594 | 85.56443 | 51.25395 |
| 20896   | NBEA      | 1150.612 | 0.102236 | 0.114746 | 0.890976 | 0.372942 | 0.474482 | 1102.604 | 1166.535 | 1065.165 | 1124.992 | 1152.981 | 1291.399 |
| 21686   | DOT1L     | 819.2549 | 0.102175 | 0.131088 | 0.779443 | 0.435719 | 0.534151 | 726.3957 | 833.1608 | 816.0929 | 819.1906 | 785.0536 | 935.6359 |
| 20579   | USP4      | 2546.647 | 0.102097 | 0.108495 | 0.941033 | 0.346688 | 0.447847 | 2405.779 | 2687.792 | 2280.607 | 2544.625 | 2522.011 | 2839.067 |
| 21908   | CKLF      | 3843.576 | 0.102023 | 0.137274 | 0.743205 | 0.457357 | 0.554996 | 4090.584 | 2887.05  | 4146.559 | 3921.847 | 4006.554 | 4008.863 |
| 23317   | LOC103230 | 219.4083 | 0.101898 | 0.199373 | 0.511094 | 0.609286 | 0.69468  | 222.7975 | 192.689  | 222.634  | 203.1236 | 213.9111 | 261.2947 |
| 21430   | TP53I11   | 4555.06  | 0.101865 | 0.12515  | 0.813941 | 0.415679 | 0.51567  | 3841.766 | 5211.908 | 4131.949 | 4578.092 | 4564.862 | 5001.783 |
| 23518   | B4GALT1   | 173.4762 | 0.101758 | 0.211773 | 0.480505 | 0.630868 | 0.713147 | 167.5047 | 165.3184 | 171.8456 | 171.8738 | 158.2942 | 206.0208 |
| 24799   | LOC119618 | 49.89364 | 0.101672 | 0.361323 | 0.281389 | 0.778412 | 0.834472 | 49.87195 | 49.26706 | 44.52681 | 60.26743 | 49.19955 | 46.22906 |
| 25423</ |           |          |          |          |          |          |          |          |          |          |          |          |          |



|       |           |          |          |          |          |          |          |          |          |          |          |          |          |
|-------|-----------|----------|----------|----------|----------|----------|----------|----------|----------|----------|----------|----------|----------|
| 25678 | LOC119621 | 15.58691 | 0.100452 | 0.723205 | 0.138899 | 0.88953  | 0.92095  | 15.17842 | 12.59047 | 16.69755 | 8.928508 | 32.08666 | 8.039836 |
| 21581 | POFUT2    | 2071.821 | 0.100276 | 0.126661 | 0.791689 | 0.428542 | 0.527909 | 2243.695 | 1805.912 | 1955.005 | 2142.842 | 1901.669 | 2381.801 |
| 22435 | TMEM1201  | 829.6937 | 0.100254 | 0.154065 | 0.650721 | 0.515227 | 0.610533 | 880.3483 | 668.3898 | 857.8368 | 868.2974 | 746.5496 | 956.7405 |
| 20764 | WDSUB1    | 1282.54  | 0.099984 | 0.109974 | 0.909165 | 0.363263 | 0.465101 | 1239.209 | 1187.884 | 1289.886 | 1223.206 | 1388.283 | 1366.772 |
| 19974 | ALDH7A1   | 3829.356 | 0.099955 | 0.096685 | 1.033831 | 0.301215 | 0.400912 | 3716.002 | 3962.714 | 3413.258 | 3921.847 | 3876.069 | 4086.247 |
| 20735 | TFIP11    | 1618.111 | 0.099924 | 0.109449 | 0.912975 | 0.361256 | 0.463177 | 1479.354 | 1690.955 | 1519.477 | 1580.346 | 1672.785 | 1765.749 |
| 23679 | CTSK      | 185.0247 | 0.099733 | 0.218478 | 0.456488 | 0.648039 | 0.72757  | 171.8414 | 188.3097 | 178.1072 | 147.3204 | 207.4937 | 217.0756 |
| 22950 | CUNH11or  | 241.1108 | 0.099659 | 0.174539 | 0.570987 | 0.568008 | 0.657952 | 234.7234 | 230.4604 | 233.07   | 247.7661 | 252.4151 | 248.2299 |
| 24994 | LOC103231 | 43.18142 | 0.099656 | 0.404374 | 0.246445 | 0.805338 | 0.856602 | 49.87195 | 34.48694 | 40.35242 | 55.80317 | 36.36488 | 42.20914 |
| 23162 | THAP3     | 714.3925 | 0.099597 | 0.186002 | 0.53546  | 0.592332 | 0.67987  | 800.6616 | 493.218  | 777.8277 | 694.1915 | 714.463  | 805.9935 |
| 21041 | RBMXL1    | 1475.045 | 0.099461 | 0.113709 | 0.874698 | 0.381738 | 0.482275 | 1384.489 | 1573.809 | 1312.149 | 1520.078 | 1574.385 | 1485.36  |
| 21862 | LOC103211 | 3348.841 | 0.099233 | 0.132229 | 0.75046  | 0.452978 | 0.550812 | 3493.747 | 2583.236 | 3625.456 | 3368.28  | 3520.976 | 3501.348 |
| 20788 | CLASP1    | 3931.994 | 0.099144 | 0.109413 | 0.90614  | 0.364862 | 0.466608 | 3524.103 | 4143.907 | 3729.12  | 3964.258 | 3758.417 | 4472.159 |
| 25803 | LOC103231 | 9.956975 | 0.098558 | 0.822329 | 0.119852 | 0.9046   | 0.932016 | 8.131296 | 14.23271 | 6.957314 | 8.928508 | 6.417332 | 15.07469 |
| 21154 | SPTY2D1   | 2704.761 | 0.098538 | 0.114853 | 0.857949 | 0.390921 | 0.491284 | 2460.53  | 2988.869 | 2387.75  | 2691.945 | 2883.521 | 2815.952 |
| 20990 | DEDD      | 1184.535 | 0.0984   | 0.111796 | 0.880176 | 0.378764 | 0.479726 | 1090.678 | 1198.832 | 1147.261 | 1189.724 | 1172.233 | 1308.483 |
| 21629 | C1GALT1C  | 927.8918 | 0.098356 | 0.125137 | 0.785992 | 0.431872 | 0.53083  | 831.5605 | 966.7293 | 887.0575 | 953.1182 | 1037.469 | 891.4168 |
| 20424 | DNAL1     | 1431.565 | 0.098325 | 0.102639 | 0.957968 | 0.338079 | 0.440062 | 1393.704 | 1423.271 | 1328.151 | 1537.935 | 1480.265 | 1426.066 |
| 22306 | SNUPN     | 606.5484 | 0.09831  | 0.145873 | 0.673939 | 0.50035  | 0.596333 | 659.7191 | 532.6317 | 567.0211 | 566.9603 | 656.707  | 656.2516 |
| 22007 | SALL2     | 1067.174 | 0.098219 | 0.135506 | 0.724828 | 0.468558 | 0.566029 | 958.9508 | 1193.905 | 942.716  | 1053.564 | 1060.999 | 1192.911 |
| 21261 | ABCF3     | 1603.807 | 0.098207 | 0.116793 | 0.840859 | 0.400427 | 0.500703 | 1502.663 | 1587.494 | 1564.7   | 1616.06  | 1486.682 | 1865.242 |
| 25260 | LOC119621 | 37.83334 | 0.098078 | 0.476696 | 0.205746 | 0.836989 | 0.880893 | 39.03022 | 32.2973  | 36.87376 | 64.73168 | 29.94755 | 24.11951 |
| 25602 | LOC119621 | 15.00151 | 0.097991 | 0.650192 | 0.15071  | 0.880204 | 0.914    | 13.55216 | 13.13788 | 16.69755 | 11.16063 | 21.39111 | 14.06971 |
| 21626 | ZNFA46    | 1152.976 | 0.097956 | 0.124605 | 0.786135 | 0.431788 | 0.530776 | 1189.337 | 1036.798 | 1120.128 | 1032.116 | 1060.999 | 1307.478 |
| 25357 | LOC103231 | 29.03202 | 0.097741 | 0.516881 | 0.189099 | 0.850015 | 0.89118  | 23.30971 | 21.34906 | 39.65669 | 20.08914 | 40.6431  | 29.1444  |
| 25331 | LOC103211 | 29.11177 | 0.097543 | 0.501715 | 0.19442  | 0.845847 | 0.887721 | 30.35684 | 18.612   | 34.78657 | 35.71403 | 32.08666 | 23.11453 |
| 21236 | LTBP4     | 2027.794 | 0.09744  | 0.115299 | 0.845108 | 0.398051 | 0.49833  | 1966.689 | 1814.67  | 2103.196 | 2066.95  | 1903.808 | 2311.453 |
| 21638 | TBK1      | 1530.769 | 0.097341 | 0.124199 | 0.78375  | 0.433187 | 0.532224 | 1426.229 | 1688.765 | 1320.498 | 1535.703 | 1672.785 | 1540.634 |
| 21480 | PPP2R2D   | 1265.135 | 0.097336 | 0.120611 | 0.807026 | 0.419652 | 0.519324 | 1142.718 | 1360.318 | 1166.046 | 1345.973 | 1215.015 | 1360.742 |
| 20891 | ASH2L     | 1229.204 | 0.097136 | 0.108999 | 0.891163 | 0.372842 | 0.474423 | 1215.358 | 1222.371 | 1127.781 | 1292.402 | 1195.763 | 1321.548 |
| 25942 | LOC119621 | 7.103655 | 0.097103 | 0.996065 | 0.097486 | 0.92234  | 0.945201 | 7.589209 | 4.926706 | 7.653045 | 4.464254 | 14.97377 | 3.014938 |
| 21752 | SKP1      | 11011.44 | 0.097017 | 0.126301 | 0.768145 | 0.442401 | 0.540696 | 11262.93 | 8572.469 | 12087.64 | 11490.99 | 11707.35 | 10947.24 |
| 21931 | CCDC51    | 739.3581 | 0.09684  | 0.130934 | 0.739613 | 0.459535 | 0.557053 | 726.9378 | 700.6871 | 721.4734 | 736.6019 | 695.211  | 855.2375 |
| 22233 | ANAPC2    | 1453.764 | 0.096738 | 0.140827 | 0.686926 | 0.492129 | 0.588435 | 1551.451 | 1186.789 | 1481.908 | 1488.829 | 1326.249 | 1687.361 |
| 24389 | LOC103221 | 104.5723 | 0.096702 | 0.277688 | 0.348239 | 0.727661 | 0.79318  | 120.8853 | 85.39624 | 96.01093 | 100.4457 | 126.2075 | 98.48799 |
| 22716 | UPF2      | 1976.878 | 0.096681 | 0.159426 | 0.606433 | 0.544227 | 0.636931 | 1645.774 | 2477.586 | 1607.835 | 2013.379 | 2085.633 | 2031.064 |
| 20360 | SGMS1     | 1726.997 | 0.096646 | 0.099845 | 0.967966 | 0.333061 | 0.434894 | 1607.828 | 1768.688 | 1630.794 | 1761.148 | 1809.688 | 1783.839 |
| 21226 | MAP2K7    | 1623.604 | 0.096491 | 0.113902 | 0.847144 | 0.396915 | 0.497126 | 1592.108 | 1475.275 | 1644.709 | 1743.291 | 1497.377 | 1788.863 |
| 21287 | CD55      | 1490.515 | 0.096486 | 0.115426 | 0.835915 | 0.403203 | 0.503554 | 1367.142 | 1559.029 | 1399.812 | 1397.311 | 1578.664 | 1641.131 |
| 22336 | ABRACL    | 577.8787 | 0.096271 | 0.143392 | 0.668921 | 0.503546 | 0.599335 | 602.8    | 485.5543 | 586.5015 | 604.9064 | 609.6465 | 577.8632 |
| 23170 | FOS       | 353.087  | 0.09627  | 0.180198 | 0.534246 | 0.593171 | 0.680598 | 371.8712 | 302.7187 | 353.4315 | 308.0335 | 359.3706 | 423.0964 |
| 23403 | LOC103211 | 299.551  | 0.096204 | 0.192995 | 0.498476 | 0.618148 | 0.702195 | 263.454  | 329.5419 | 275.5096 | 363.8367 | 252.4151 | 312.5486 |
| 22560 | KIF21B    | 425.0602 | 0.096169 | 0.152406 | 0.63101  | 0.528034 | 0.622242 | 395.723  | 420.9597 | 417.4388 | 381.6937 | 481.2999 | 453.2457 |
| 21545 | ZNFA64    | 1305.243 | 0.096154 | 0.120464 | 0.7982   | 0.424755 | 0.524117 | 1172.533 | 1332.4   | 1283.624 | 1415.169 | 1193.624 | 1434.106 |
| 25722 | LOC119611 | 11.3491  | 0.09607  | 0.730782 | 0.131462 | 0.89541  | 0.925452 | 9.757555 | 11.49565 | 11.82743 | 13.39276 | 8.556443 | 13.06473 |
| 25371 | LOC119621 | 23.59176 | 0.095865 | 0.51355  | 0.186671 | 0.851919 | 0.892683 | 21.14137 | 21.89647 | 25.04633 | 24.5534  | 27.80844 | 21.10457 |
| 21526 | ULK4      | 787.0914 | 0.095796 | 0.119665 | 0.800539 | 0.423399 | 0.522901 | 784.9411 | 755.4283 | 742.3454 | 765.6196 | 864.2007 | 810.0135 |
| 20968 | PUM2      | 4627.284 | 0.095786 | 0.108467 | 0.883085 | 0.37719  | 0.478211 | 4330.728 | 4985.279 | 4109.685 | 4629.431 | 4552.027 | 5156.55  |
| 20123 | IREB2     | 5112.427 | 0.095738 | 0.094899 | 1.008838 | 0.313052 | 0.413581 | 4859.804 | 5298.946 | 4673.923 | 5049.071 | 5232.265 | 5560.551 |
| 25345 | LOC103231 | 32.13428 | 0.09572  | 0.501984 | 0.190683 | 0.848774 | 0.8903   | 22.22554 | 47.62483 | 22.95914 | 33.4819  | 36.36488 | 30.14938 |
| 25741 | LOC119621 | 11.0039  | 0.095689 | 0.743278 | 0.128739 | 0.897564 | 0.926994 | 9.757555 | 12.04306 | 10.43597 | 11.16063 | 8.556443 | 14.06971 |
| 20393 | TFE3      | 3558.124 | 0.095671 | 0.099391 | 0.962577 | 0.33576  | 0.437708 | 3416.228 | 3557.629 | 3354.121 | 3522.296 | 3467.498 | 4030.973 |
| 21083 | FTO       | 3920.606 | 0.095588 | 0.110193 | 0.86746  | 0.38569  | 0.486343 | 3536.029 | 4299.372 | 3539.881 | 3921.847 | 3957.355 | 4269.153 |
| 25005 | PRRT4     | 42.24193 | 0.095563 | 0.390479 | 0.244733 | 0.806663 | 0.857634 | 41.19856 | 38.86624 | 43.13534 | 44.64254 | 36.36488 | 49.24399 |
| 21839 | MTRF1L    | 1336.837 | 0.095533 | 0.126602 | 0.754591 | 0.450494 | 0.548413 | 1186.085 | 1491.15  | 1200.832 | 1323.651 | 1230.369 | 1398.931 |
| 25945 | LOC119611 | 6.78992  | 0.095454 | 0.98634  | 0.096776 | 0.922904 | 0.945669 | 5.420864 | 6.568942 | 7.653045 | 2.232127 | 12.83466 | 6.029877 |
| 21844 | ELL       | 780.9738 | 0.095268 | 0.126338 | 0.754071 | 0.450807 | 0.548676 | 786.5673 | 741.743  | 740.9539 | 816.9585 | 727.2976 | 872.3222 |
| 22739 | FAM89B    | 659.4488 | 0.09521  | 0.157966 | 0.602725 | 0.546692 | 0.639144 | 642.3723 | 550.1489 | 724.9521 | 683.0309 | 590.3945 | 765.7944 |
| 25913 | LOC119621 | 9.191693 | 0.095125 | 0.924769 | 0.102863 | 0.918072 | 0.94188  | 11.9259  | 3.831883 | 11.1317  | 2.232127 | 14.97377 | 11.05477 |
| 24247 | CLIP3     | 162.8652 | 0.094911 | 0.257379 | 0.368759 | 0.712307 | 0.780991 | 141.4845 | 207.4691 | 124.5359 | 158.481  | 158.2942 | 186.9262 |
| 22467 | GCC1      | 746.443  | 0.094525 | 0.146309 | 0.646062 | 0.518239 | 0.613228 | 797.409  | 698.4975 | 675.5552 | 714.2806 | 699.4892 | 893.4267 |
| 25559 | LOC119621 | 20.61676 | 0.094438 | 0.604667 | 0.156183 | 0.875889 | 0.911049 | 26.56223 | 12.59047 | 21.56767 | 17.85702 | 14.97377 | 30.14938 |
| 21819 | CHD7      | 4190.868 | 0.094333 | 0.124568 | 0.757277 | 0.448884 | 0.546946 | 3782.137 | 4786.021 | 3596.235 | 4073.632 | 4295.334 | 4611.851 |
| 25424 | ZFR2      | 22.56869 | 0.094172 | 0.530624 | 0.177475 | 0.859135 | 0.898368 | 22.76763 | 18.06459 | 24.3506  | 22.32127 | 27.80844 | 20.09959 |
| 21804 | SLC25A28  | 1333.913 | 0.094078 | 0.1239   | 0.759304 | 0.447671 | 0.545832 | 1314.017 | 1417.249 | 1141.695 | 1410.704 | 1270.632 | 1449.18  |
| 24736 | LRRC73    | 65.62366 | 0.094022 | 0.321188 | 0.292732 | 0.769727 | 0.827264 | 61.25576 | 63.49977 | 66.79021 | 69.19594 | 55.61688 | 77.38342 |
| 21264 | MAU2      | 2154.179 | 0.094019 | 0.111886 | 0.840311 | 0.400734 | 0.501012 | 2174.851 | 2047.32  | 2034.319 | 2316.948 | 1948.73  | 2402.906 |
| 23661 | LOC103221 | 173.2533 | 0.094017 | 0.204252 | 0.460299 | 0.645302 | 0.725047 | 166.4205 | 176.814  | 158.6268 | 178.5702 | 188.2417 | 170.8465 |
| 26058 | TRNAK-UU  | 3.772511 | 0.093989 | 1.232485 | 0.07626  | 0.939212 | 0.958207 | 4.336691 | 3.284471 | 3.478657 | 2.232127 | 4.278221 | 5.024897 |
| 21817 | ARHGFE18  | 1521.121 | 0.093834 | 0.123838 | 0.757712 | 0.       |          |          |          |          |          |          |          |



|       |           |          |          |          |          |          |          |          |          |          |          |          |          |
|-------|-----------|----------|----------|----------|----------|----------|----------|----------|----------|----------|----------|----------|----------|
| 20971 | CAMK2G    | 1504.983 | 0.093474 | 0.105869 | 0.882916 | 0.377281 | 0.478281 | 1483.69  | 1482.391 | 1406.073 | 1433.026 | 1593.637 | 1631.082 |
| 21773 | LOC103232 | 693.4746 | 0.09347  | 0.122344 | 0.763996 | 0.44487  | 0.543189 | 675.4396 | 648.1356 | 691.557  | 683.0309 | 723.0194 | 739.6649 |
| 22008 | TOR3A     | 838.1244 | 0.093144 | 0.128524 | 0.724725 | 0.468621 | 0.56608  | 843.4864 | 825.497  | 767.3917 | 895.0829 | 763.6625 | 933.6259 |
| 26192 | LOC103235 | 2.384051 | 0.09308  | 1.611075 | 0.057775 | 0.953928 | 0.968204 | 2.168345 | 3.831883 | 0.695731 | 4.464254 | 2.139111 | 1.004979 |
| 25779 | LOC103240 | 11.26026 | 0.093024 | 0.75977  | 0.122437 | 0.902553 | 0.930772 | 8.131296 | 12.04306 | 12.52316 | 6.696381 | 17.11289 | 11.05477 |
| 20832 | LOC119627 | 1621.67  | 0.092784 | 0.103096 | 0.899977 | 0.368133 | 0.469797 | 1474.475 | 1608.296 | 1623.837 | 1665.167 | 1741.236 | 1617.012 |
| 23556 | EEF1AKMT  | 281.1156 | 0.092756 | 0.195017 | 0.475631 | 0.634337 | 0.715905 | 298.1475 | 232.1026 | 289.4243 | 249.9982 | 282.3626 | 334.6582 |
| 22311 | RAB40C    | 637.0632 | 0.092631 | 0.137554 | 0.673411 | 0.500686 | 0.596636 | 658.0929 | 547.4118 | 646.3344 | 656.2453 | 628.8985 | 685.396  |
| 25668 | LOC103225 | 15.66621 | 0.092555 | 0.661467 | 0.139924 | 0.88872  | 0.92047  | 16.26259 | 18.06459 | 11.1317  | 8.928508 | 23.53022 | 16.07967 |
| 19429 | STARD3NL  | 4479.35  | 0.092525 | 0.083109 | 1.113294 | 0.265582 | 0.3634   | 4413.125 | 4314.7   | 4277.356 | 4732.109 | 4586.253 | 4552.557 |
| 21677 | CLUH      | 6083.803 | 0.092486 | 0.118515 | 0.780375 | 0.43517  | 0.533699 | 6256.761 | 5234.899 | 6182.269 | 6176.295 | 5574.522 | 7078.07  |
| 24220 | LOC103218 | 129.4522 | 0.09237  | 0.249041 | 0.370904 | 0.710709 | 0.780107 | 138.7741 | 105.6505 | 132.8847 | 136.1597 | 115.512  | 147.732  |
| 22496 | ARSB      | 969.2751 | 0.092343 | 0.144383 | 0.639569 | 0.522453 | 0.617417 | 899.3213 | 1099.75  | 818.1801 | 991.0644 | 921.9567 | 1085.378 |
| 22142 | DNAJC5    | 4876.105 | 0.092228 | 0.13154  | 0.701143 | 0.483214 | 0.580197 | 5282.632 | 3932.059 | 4952.216 | 4828.091 | 4590.531 | 5671.099 |
| 23519 | LOC103245 | 308.043  | 0.092111 | 0.191757 | 0.480353 | 0.630976 | 0.713232 | 311.6997 | 243.0508 | 340.9084 | 343.7476 | 280.2235 | 328.6283 |
| 22982 | DPH6      | 337.6282 | 0.092079 | 0.162361 | 0.567127 | 0.570628 | 0.660088 | 325.2518 | 332.279  | 323.5151 | 305.8014 | 387.179  | 351.7428 |
| 23813 | LOC103247 | 634.3276 | 0.092018 | 0.211543 | 0.434987 | 0.663572 | 0.740827 | 462.9418 | 850.1305 | 528.7558 | 591.5136 | 729.4367 | 643.1869 |
| 20744 | HMG20B    | 2314.656 | 0.091945 | 0.100909 | 0.911167 | 0.362207 | 0.464198 | 2251.285 | 2160.087 | 2317.481 | 2357.126 | 2233.232 | 2568.728 |
| 21676 | DCAF11    | 2369.873 | 0.091657 | 0.117448 | 0.780406 | 0.435152 | 0.533699 | 2395.48  | 2293.656 | 2201.99  | 2399.537 | 2149.806 | 2778.768 |
| 25698 | PGF       | 18.04256 | 0.091319 | 0.676851 | 0.134917 | 0.892678 | 0.923458 | 18.97302 | 11.49565 | 21.56767 | 8.928508 | 34.22577 | 13.06473 |
| 22113 | CGREF1    | 950.9767 | 0.091263 | 0.12923  | 0.706209 | 0.480058 | 0.577101 | 982.8026 | 831.5185 | 953.152  | 948.654  | 913.4003 | 1076.333 |
| 24181 | LOC103215 | 134.2092 | 0.091252 | 0.241988 | 0.377093 | 0.706104 | 0.77632  | 142.5687 | 126.9995 | 118.2743 | 138.3919 | 160.4333 | 118.5876 |
| 25811 | LOC119625 | 11.34245 | 0.091246 | 0.768931 | 0.118666 | 0.90554  | 0.932695 | 10.84173 | 10.40082 | 11.1317  | 20.08914 | 8.556443 | 7.034856 |
| 22032 | MAN2B2    | 969.0429 | 0.091212 | 0.12667  | 0.720071 | 0.471481 | 0.568915 | 890.6479 | 1003.406 | 926.0185 | 993.2965 | 898.4265 | 1102.462 |
| 22108 | ZNF197    | 1333.837 | 0.091087 | 0.128779 | 0.707308 | 0.479375 | 0.576451 | 1279.324 | 1479.107 | 1116.649 | 1343.74  | 1388.283 | 1395.916 |
| 20778 | UBE2A     | 3129.115 | 0.091067 | 0.100403 | 0.907016 | 0.364398 | 0.46624  | 2811.26  | 3283.376 | 2997.211 | 3323.637 | 3091.015 | 3268.193 |
| 25305 | LOC119625 | 30.88444 | 0.090781 | 0.457669 | 0.198356 | 0.842767 | 0.885396 | 28.73058 | 29.01283 | 31.30791 | 40.17829 | 29.94755 | 26.12947 |
| 22274 | GLA       | 1231.874 | 0.090765 | 0.13387  | 0.678011 | 0.497764 | 0.594104 | 1346     | 1047.746 | 1189.005 | 1292.402 | 1142.285 | 1373.807 |
| 25891 | TKTL2     | 9.888428 | 0.090611 | 0.859862 | 0.105378 | 0.916076 | 0.94063  | 10.84173 | 8.758589 | 8.348776 | 13.39276 | 14.97377 | 3.014938 |
| 21322 | FBXW8     | 2063.716 | 0.090433 | 0.109058 | 0.829215 | 0.406983 | 0.50744  | 1888.087 | 2174.32  | 1939.699 | 2029.003 | 2057.824 | 2293.363 |
| 20701 | KAT5      | 1491.803 | 0.090353 | 0.098084 | 0.921177 | 0.356958 | 0.458419 | 1454.96  | 1452.284 | 1428.337 | 1569.185 | 1497.377 | 1548.673 |
| 22191 | COMMD3    | 773.8118 | 0.090309 | 0.130269 | 0.693247 | 0.488155 | 0.584813 | 737.2375 | 684.2648 | 828.6161 | 758.9232 | 827.8358 | 805.9935 |
| 20254 | CBFL      | 3403.418 | 0.090248 | 0.091445 | 0.986902 | 0.32369  | 0.42489  | 3292.633 | 3446.505 | 3155.142 | 3412.922 | 3463.22  | 3650.085 |
| 20283 | MYL12B    | 15659.93 | 0.090243 | 0.09197  | 0.981227 | 0.326481 | 0.42792  | 14246.57 | 16218.72 | 15040.32 | 16307.92 | 16924.64 | 15221.42 |
| 24559 | LOC103225 | 109.5167 | 0.090157 | 0.279736 | 0.322295 | 0.747229 | 0.808872 | 90.52842 | 125.9047 | 102.2725 | 87.05295 | 134.764  | 116.5776 |
| 20634 | CUNH6orf1 | 2008.463 | 0.090038 | 0.096813 | 0.930027 | 0.352357 | 0.453935 | 1959.1   | 2031.445 | 1846.471 | 2033.468 | 2107.024 | 2073.273 |
| 25939 | CDC14C    | 7.181755 | 0.089931 | 0.913373 | 0.09846  | 0.921567 | 0.944518 | 9.215468 | 6.02153  | 5.565851 | 6.696381 | 8.556443 | 7.034856 |
| 24652 | PRELID2   | 93.36592 | 0.089928 | 0.292958 | 0.306966 | 0.758869 | 0.81834  | 74.26583 | 113.3142 | 83.48776 | 102.6778 | 91.98176 | 94.46807 |
| 22031 | NABP1     | 1473.591 | 0.089923 | 0.124833 | 0.720346 | 0.471312 | 0.568737 | 1330.28  | 1636.761 | 1317.715 | 1424.097 | 1550.855 | 1581.838 |
| 22004 | SLC35A2   | 1387.624 | 0.089906 | 0.123871 | 0.725802 | 0.46796  | 0.565384 | 1404.004 | 1240.435 | 1394.246 | 1446.418 | 1257.797 | 1582.843 |
| 23083 | TOR2A     | 327.2609 | 0.089902 | 0.163762 | 0.548982 | 0.583018 | 0.67147  | 289.4741 | 345.4169 | 315.862  | 330.3548 | 350.8141 | 331.6432 |
| 21569 | EPN2      | 2678.199 | 0.089754 | 0.113024 | 0.794114 | 0.427129 | 0.52646  | 2398.19  | 2945.076 | 2442.713 | 2808.016 | 2631.106 | 2844.092 |
| 26207 | LOC119626 | 2.698245 | 0.089541 | 1.623706 | 0.055146 | 0.956022 | 0.969826 | 2.168345 | 3.284471 | 2.087194 | 2.232127 | 6.417332 | 0        |
| 20263 | NEK6      | 4147.303 | 0.08943  | 0.090742 | 0.985542 | 0.324358 | 0.425557 | 4157.802 | 3790.827 | 4111.772 | 4160.685 | 4224.744 | 4437.989 |
| 21772 | COP55     | 2161.305 | 0.089395 | 0.116983 | 0.764168 | 0.444767 | 0.543089 | 2262.126 | 1799.343 | 2222.862 | 2191.949 | 2235.371 | 2256.179 |
| 25219 | LOC119625 | 51.69881 | 0.089289 | 0.422591 | 0.211129 | 0.832661 | 0.877762 | 55.8349  | 49.26706 | 43.13534 | 55.80317 | 77.00798 | 29.1444  |
| 22710 | TMEM9     | 2374.431 | 0.088954 | 0.146484 | 0.607263 | 0.543676 | 0.636468 | 2627.493 | 1844.23  | 2436.451 | 2448.643 | 2156.224 | 2733.544 |
| 22288 | NDST2     | 1164.272 | 0.08889  | 0.131456 | 0.676196 | 0.498916 | 0.595104 | 1155.728 | 1144.638 | 1090.907 | 1205.349 | 1018.217 | 1370.792 |
| 21076 | DYNC1H1   | 43672.25 | 0.088822 | 0.10221  | 0.869017 | 0.384838 | 0.485411 | 41408.35 | 44678.66 | 40906.92 | 43059.96 | 41327.62 | 50651.97 |
| 25322 | LOC119625 | 37.58068 | 0.088742 | 0.452241 | 0.196228 | 0.844432 | 0.886541 | 29.81475 | 38.31883 | 40.35242 | 58.0353  | 27.80844 | 31.15436 |
| 22307 | TTL1      | 1132.86  | 0.088739 | 0.131716 | 0.673713 | 0.500494 | 0.596478 | 1055.442 | 1269.995 | 967.0666 | 1169.635 | 1189.346 | 1145.677 |
| 24581 | LCA5L     | 86.53477 | 0.088731 | 0.278181 | 0.318968 | 0.749751 | 0.810875 | 87.27591 | 85.94365 | 77.92191 | 98.21359 | 83.42532 | 86.42823 |
| 22230 | RASAL2    | 2364.826 | 0.088678 | 0.129031 | 0.687261 | 0.491918 | 0.588288 | 2068.602 | 2712.973 | 2097.63  | 2383.912 | 2320.935 | 2604.907 |
| 25746 | FBXL22    | 13.66303 | 0.088672 | 0.692524 | 0.128041 | 0.898116 | 0.927356 | 14.09425 | 16.96977 | 8.348776 | 13.39276 | 17.11289 | 12.05975 |
| 24351 | LOC119625 | 134.7825 | 0.088444 | 0.250071 | 0.353674 | 0.723583 | 0.78996  | 113.8381 | 147.2538 | 132.8847 | 111.6063 | 143.3204 | 159.7917 |
| 21258 | PHLPP2    | 1802.371 | 0.088372 | 0.105068 | 0.841092 | 0.400297 | 0.500606 | 1869.656 | 1675.628 | 1700.367 | 1792.398 | 1805.409 | 1970.765 |
| 19592 | SAP18     | 7840.245 | 0.088365 | 0.081296 | 1.086951 | 0.277059 | 0.375949 | 7391.348 | 7674.166 | 7735.141 | 8307.977 | 7854.814 | 8078.025 |
| 23420 | SNRNP35   | 576.3446 | 0.088297 | 0.177881 | 0.496385 | 0.619623 | 0.703359 | 456.9788 | 706.1612 | 513.4498 | 600.4422 | 569.0034 | 612.0325 |
| 21876 | CCDC117   | 1517.403 | 0.088245 | 0.117884 | 0.748578 | 0.454111 | 0.551863 | 1427.855 | 1648.804 | 1336.5   | 1495.525 | 1612.889 | 1582.843 |
| 25808 | LOC119625 | 11.61886 | 0.088004 | 0.739017 | 0.119083 | 0.90521  | 0.932463 | 15.17842 | 9.306001 | 9.044508 | 11.16063 | 14.97377 | 10.04979 |
| 23708 | LOC119625 | 271.0239 | 0.087989 | 0.194327 | 0.452787 | 0.650702 | 0.729666 | 258.5752 | 229.913  | 302.6431 | 238.8376 | 286.6408 | 309.5337 |
| 24516 | LRFN1     | 124.2287 | 0.087828 | 0.267421 | 0.328426 | 0.74259  | 0.80526  | 97.57555 | 153.2753 | 110.6213 | 122.767  | 130.4858 | 130.6473 |
| 22962 | RSRC2     | 4412.812 | 0.087794 | 0.154216 | 0.569294 | 0.569157 | 0.65896  | 3640.11  | 5557.872 | 3637.284 | 4689.699 | 4370.203 | 4581.701 |
| 20512 | HERPUD1   | 3538.726 | 0.087742 | 0.092913 | 0.944434 | 0.344996 | 0.447139 | 3550.666 | 3378.626 | 3365.253 | 3816.937 | 3405.464 | 3715.409 |
| 21990 | CEP57L1   | 1222.155 | 0.087715 | 0.120281 | 0.729252 | 0.465847 | 0.56319  | 1189.88  | 1305.03  | 1057.512 | 1279.009 | 1283.466 | 1218.035 |
| 21702 | MEMO1     | 1539.401 | 0.087539 | 0.11261  | 0.777366 | 0.436943 | 0.535246 | 1587.771 | 1347.18  | 1545.219 | 1504.454 | 1625.724 | 1626.057 |
| 25188 | LOC103215 | 51.37835 | 0.087477 | 0.404411 | 0.216308 | 0.828748 | 0.874713 | 53.12446 | 34.48694 | 61.22436 | 71.42806 | 42.78221 | 45.22408 |
| 22189 | RNF166    | 709.7024 | 0.087328 | 0.125938 | 0.693424 | 0.488044 | 0.584733 | 661.8875 | 700.6871 | 704.0801 | 763.3874 | 667.4025 | 760.7695 |
| 21690 | SPAST     | 1809.189 | 0.08721  | 0.112007 | 0.778613 | 0.436207 | 0.534651 | 1699.983 | 1915.394 | 1652.362 | 1834.808 | 1747.653 | 2004.934 |
| 20470 | REEP2     | 3230.865 | 0.087189 | 0.091706 | 0.950744 | 0.       |          |          |          |          |          |          |          |



|       |           |          |          |          |          |          |          |          |          |          |          |          |          |
|-------|-----------|----------|----------|----------|----------|----------|----------|----------|----------|----------|----------|----------|----------|
| 25137 | LOC103221 | 44.59226 | 0.086776 | 0.385493 | 0.225104 | 0.821898 | 0.869243 | 43.909   | 48.17224 | 36.87376 | 51.33892 | 47.06043 | 40.19918 |
| 25715 | LOC103231 | 19.65033 | 0.086723 | 0.653076 | 0.132792 | 0.894358 | 0.92458  | 25.47806 | 7.663765 | 24.3506  | 22.32127 | 14.97377 | 23.11453 |
| 20897 | CXADR     | 6074.62  | 0.086681 | 0.097305 | 0.890811 | 0.37303  | 0.474566 | 5591.621 | 6445.227 | 5641.686 | 5937.458 | 6410.915 | 6420.814 |
| 21505 | PLEKHM2   | 3770.375 | 0.086673 | 0.107979 | 0.802688 | 0.422155 | 0.521854 | 3685.645 | 3685.176 | 3607.367 | 3950.865 | 3396.908 | 4296.287 |
| 24174 | GMPR      | 143.5404 | 0.086493 | 0.228442 | 0.378621 | 0.704969 | 0.77528  | 133.3532 | 157.1072 | 128.0146 | 138.3919 | 147.5986 | 156.7768 |
| 22014 | TMBIM4    | 2219.247 | 0.086415 | 0.119449 | 0.723451 | 0.469403 | 0.56687  | 2383.012 | 1835.472 | 2240.255 | 2292.394 | 2276.014 | 2288.338 |
| 21707 | TNK52     | 3958.593 | 0.086373 | 0.111205 | 0.776697 | 0.437337 | 0.535616 | 3470.979 | 4232.588 | 3822.348 | 3774.527 | 4032.224 | 4418.895 |
| 26029 | ZACN      | 5.148229 | 0.086372 | 1.064074 | 0.081171 | 0.935306 | 0.955285 | 3.794605 | 4.926706 | 6.261582 | 4.464254 | 6.417332 | 5.024897 |
| 26746 | LOC103221 | 0.439427 | 0.086345 | 3.758204 | 0.022975 | 0.98167  | NA       | 1.084173 | 0.547412 | 0        | 0        | 0        | 1.004979 |
| 23256 | GOLT1A    | 524.5669 | 0.086241 | 0.165434 | 0.521304 | 0.602155 | 0.688291 | 574.0695 | 408.3692 | 545.4534 | 531.2462 | 530.4994 | 557.7636 |
| 21353 | RTN2      | 1385.645 | 0.086221 | 0.104668 | 0.823759 | 0.410076 | 0.510555 | 1368.226 | 1315.978 | 1351.806 | 1448.65  | 1334.805 | 1494.404 |
| 22321 | LOC103221 | 1980.562 | 0.086195 | 0.128263 | 0.672018 | 0.501572 | 0.597388 | 2128.231 | 1668.511 | 1973.094 | 1964.272 | 1876     | 2273.264 |
| 22382 | UBE4B     | 1948.53  | 0.086177 | 0.130339 | 0.661179 | 0.508497 | 0.603985 | 1669.084 | 2163.919 | 1842.992 | 1948.647 | 1837.496 | 2229.044 |
| 24442 | LOC119621 | 129.9615 | 0.086093 | 0.254092 | 0.338827 | 0.73474  | 0.79916  | 120.8853 | 151.0857 | 106.4469 | 116.0706 | 147.5986 | 137.6822 |
| 22968 | LOC119621 | 703.5693 | 0.086089 | 0.151355 | 0.568788 | 0.5695   | 0.659172 | 615.8101 | 636.6399 | 792.438  | 796.8693 | 729.4367 | 650.2217 |
| 25833 | LOC103241 | 14.30826 | 0.086003 | 0.753656 | 0.114115 | 0.909147 | 0.935533 | 18.97302 | 8.758589 | 13.91463 | 4.464254 | 25.66933 | 14.06971 |
| 23940 | TSSC4     | 691.9108 | 0.085988 | 0.206121 | 0.417173 | 0.676552 | 0.751301 | 748.0792 | 442.3087 | 825.1374 | 729.9055 | 650.2896 | 755.7446 |
| 23149 | CRELD2    | 811.8782 | 0.085949 | 0.160026 | 0.537093 | 0.591203 | 0.678955 | 866.254  | 697.9501 | 803.5697 | 868.2974 | 667.4025 | 967.7952 |
| 25695 | LOC119621 | 18.54171 | 0.085925 | 0.634189 | 0.135487 | 0.892226 | 0.923137 | 21.14137 | 18.612   | 15.30609 | 8.928508 | 17.11289 | 30.14938 |
| 20686 | PIK3C3    | 5205.408 | 0.085612 | 0.092678 | 0.923766 | 0.355608 | 0.457016 | 4889.619 | 5474.666 | 4788.719 | 5307.998 | 5377.724 | 5393.725 |
| 22064 | ARFGAP1   | 1689.777 | 0.085584 | 0.119782 | 0.714497 | 0.47492  | 0.572233 | 1789.427 | 1500.456 | 1634.273 | 1720.97  | 1585.081 | 1908.456 |
| 21649 | CYTH2     | 1301.514 | 0.085398 | 0.109014 | 0.783363 | 0.433414 | 0.532418 | 1273.361 | 1309.409 | 1210.573 | 1276.777 | 1304.858 | 1434.106 |
| 24712 | LOC119621 | 166.5663 | 0.085322 | 0.287927 | 0.296331 | 0.766977 | 0.825109 | 117.0907 | 230.4604 | 135.6676 | 187.4987 | 183.9635 | 144.717  |
| 25843 | LOC103211 | 14.82435 | 0.084624 | 0.751034 | 0.112676 | 0.910287 | 0.936423 | 8.673382 | 20.25424 | 15.30609 | 11.16063 | 6.417332 | 27.13445 |
| 22609 | NUMB      | 1825.485 | 0.084613 | 0.13578  | 0.62316  | 0.533179 | 0.626944 | 1546.572 | 2120.673 | 1650.971 | 1828.112 | 1809.688 | 1996.894 |
| 22578 | MIB2      | 934.1693 | 0.084601 | 0.134579 | 0.628637 | 0.529587 | 0.623575 | 934.0148 | 780.0618 | 1006.723 | 1008.921 | 915.5394 | 959.7554 |
| 23257 | DNAJC30   | 765.3141 | 0.084541 | 0.162156 | 0.521355 | 0.60212  | 0.688291 | 606.5946 | 908.1562 | 715.2118 | 765.6196 | 772.219  | 824.0832 |
| 22057 | TSFM      | 1203.516 | 0.084506 | 0.118168 | 0.715135 | 0.474525 | 0.571917 | 1242.462 | 1063.621 | 1202.92  | 1187.492 | 1200.041 | 1324.563 |
| 23771 | ADPRM     | 250.0875 | 0.084404 | 0.191232 | 0.441369 | 0.658946 | 0.736952 | 281.8849 | 232.65   | 212.8938 | 254.4625 | 267.3888 | 251.2449 |
| 26248 | TRNAD-GU  | 2.08971  | 0.084217 | 1.722893 | 0.048881 | 0.961014 | 0.973353 | 3.252518 | 1.642235 | 1.391463 | 2.232127 | 0        | 4.019918 |
| 22572 | LOXL3     | 724.349  | 0.084058 | 0.133502 | 0.629636 | 0.528933 | 0.62297  | 773.0152 | 649.7778 | 690.1655 | 720.977  | 710.1847 | 801.9736 |
| 23543 | ZNFE53    | 294.4356 | 0.083804 | 0.175449 | 0.477655 | 0.632896 | 0.714672 | 259.6594 | 303.8136 | 297.0773 | 290.1765 | 280.2235 | 335.6631 |
| 22100 | CEP250    | 4003.124 | 0.083691 | 0.117983 | 0.709346 | 0.47811  | 0.575138 | 3702.992 | 4454.837 | 3507.182 | 4035.686 | 3858.956 | 4459.094 |
| 22366 | HERPUD2   | 3155.713 | 0.083458 | 0.125593 | 0.664514 | 0.506362 | 0.601903 | 2806.923 | 3645.215 | 2740.486 | 3648.19  | 3142.354 | 3251.109 |
| 22354 | CALD1     | 3073.911 | 0.08327  | 0.12494  | 0.666477 | 0.505106 | 0.600709 | 2735.368 | 3519.858 | 2702.916 | 2995.514 | 3140.214 | 3349.597 |
| 24855 | LOC119611 | 72.18843 | 0.083125 | 0.304122 | 0.273328 | 0.784601 | 0.839212 | 69.38706 | 64.59459 | 76.53045 | 66.96381 | 81.28621 | 74.36848 |
| 22870 | AP1G2     | 770.4221 | 0.083078 | 0.142425 | 0.583308 | 0.559686 | 0.650606 | 732.9008 | 804.6954 | 713.1247 | 741.0662 | 710.1847 | 920.5612 |
| 25440 | LOC103241 | 28.53819 | 0.083045 | 0.476102 | 0.174426 | 0.86153  | 0.900306 | 33.06727 | 27.918   | 22.2634  | 29.01765 | 27.80844 | 31.15436 |
| 22824 | LOC119611 | 715.1327 | 0.083015 | 0.140873 | 0.589286 | 0.555669 | 0.647205 | 735.0691 | 652.5149 | 701.993  | 687.4951 | 669.5416 | 844.1828 |
| 23683 | KLHL25    | 476.4968 | 0.082953 | 0.181836 | 0.456196 | 0.648249 | 0.727694 | 550.7598 | 358.5547 | 480.7504 | 482.1394 | 464.187  | 522.5893 |
| 21574 | GARRE1    | 1493.941 | 0.08274  | 0.104356 | 0.792857 | 0.427861 | 0.527253 | 1453.334 | 1479.107 | 1422.075 | 1613.828 | 1422.509 | 1572.793 |
| 26054 | MESP1     | 5.13526  | 0.082712 | 1.075836 | 0.076882 | 0.938718 | 0.957849 | 7.047123 | 4.379295 | 3.478657 | 4.464254 | 6.417332 | 5.024897 |
| 23005 | COX19     | 1016.187 | 0.082696 | 0.147109 | 0.562141 | 0.57402  | 0.663348 | 869.5065 | 1187.336 | 901.6679 | 1060.26  | 1099.503 | 978.85   |
| 22675 | PGGT1B    | 2347.422 | 0.082596 | 0.135316 | 0.610393 | 0.541601 | 0.634821 | 2052.339 | 2777.02  | 2010.664 | 2392.84  | 2440.725 | 2410.946 |
| 22099 | NT5DC1    | 869.4469 | 0.082593 | 0.1164   | 0.709557 | 0.477979 | 0.575007 | 801.7457 | 881.8804 | 851.5752 | 904.0114 | 859.9225 | 917.5463 |
| 24965 | NKD1      | 62.89956 | 0.08259  | 0.327385 | 0.252272 | 0.800831 | 0.852797 | 52.58238 | 67.33165 | 63.31155 | 60.26743 | 70.59065 | 63.31371 |
| 22977 | UNC45A    | 3658.599 | 0.082516 | 0.145264 | 0.568043 | 0.570006 | 0.659512 | 4068.9   | 2907.304 | 3692.246 | 3531.225 | 3354.126 | 4397.79  |
| 24809 | LOC119621 | 100.6154 | 0.082453 | 0.295505 | 0.279025 | 0.780226 | 0.83608  | 74.80792 | 120.4306 | 98.09812 | 87.05295 | 119.7902 | 103.5129 |
| 22143 | BRMS1     | 1405.707 | 0.082348 | 0.117526 | 0.70068  | 0.483503 | 0.580494 | 1417.014 | 1272.185 | 1413.03  | 1444.186 | 1306.997 | 1580.833 |
| 23891 | CUNH11or  | 207.2858 | 0.082176 | 0.193887 | 0.423833 | 0.671687 | 0.747351 | 214.1241 | 186.6674 | 202.4578 | 234.3733 | 201.0764 | 250.0158 |
| 28400 | LOC119611 | 0.440315 | 0.082152 | 3.755668 | 0.021874 | 0.982548 | NA       | 0.542086 | 1.094824 | 0        | 0        | 0        | 1.004979 |
| 22409 | TRAPPC14  | 997.0039 | 0.081987 | 0.125137 | 0.655182 | 0.51235  | 0.607829 | 1013.159 | 864.9107 | 1030.378 | 1049.1   | 956.1825 | 1068.293 |
| 25398 | LOC103241 | 33.40183 | 0.081955 | 0.449648 | 0.182264 | 0.855375 | 0.895352 | 39.5723  | 27.918   | 30.61218 | 29.01765 | 32.08666 | 41.20416 |
| 22768 | CYTH1     | 975.4232 | 0.081916 | 0.136914 | 0.598303 | 0.549638 | 0.641783 | 846.1968 | 1109.604 | 887.7532 | 988.8323 | 1001.104 | 1019.049 |
| 21924 | GDI2      | 15510    | 0.081882 | 0.110535 | 0.740776 | 0.458829 | 0.55635  | 13603.66 | 17493.09 | 14111.52 | 15901.67 | 16291.47 | 15658.59 |
| 23081 | CASP9     | 1136.522 | 0.081857 | 0.149103 | 0.548996 | 0.583008 | 0.67147  | 1264.145 | 908.7036 | 1143.782 | 1162.938 | 1048.164 | 1291.399 |
| 21515 | HS2ST1    | 2714.239 | 0.081724 | 0.101918 | 0.801865 | 0.422631 | 0.522224 | 2644.839 | 2835.046 | 2435.06  | 2683.017 | 2768.009 | 2919.465 |
| 22284 | RNF5      | 1309.781 | 0.081683 | 0.120748 | 0.676474 | 0.49874  | 0.595004 | 1343.832 | 1110.151 | 1364.329 | 1332.58  | 1371.17  | 1336.623 |
| 22187 | AIFM1     | 4129.094 | 0.081583 | 0.117554 | 0.694005 | 0.487679 | 0.584349 | 3849.355 | 4605.376 | 3585.799 | 4158.453 | 4012.972 | 4562.607 |
| 24644 | LOC119621 | 129.9957 | 0.081141 | 0.263301 | 0.308168 | 0.757955 | 0.817632 | 112.2119 | 129.1892 | 134.9719 | 138.3919 | 164.7115 | 100.4979 |
| 23250 | HYKK      | 328.8337 | 0.081007 | 0.155082 | 0.522348 | 0.601428 | 0.687697 | 320.373  | 321.3307 | 317.2535 | 348.2118 | 325.1448 | 340.688  |
| 23677 | ARV1      | 407.8213 | 0.080437 | 0.176044 | 0.456911 | 0.647735 | 0.727308 | 325.2518 | 469.6793 | 394.4797 | 408.4792 | 429.9612 | 419.0764 |
| 23748 | SEC63     | 2272.072 | 0.080368 | 0.180665 | 0.444844 | 0.656432 | 0.734851 | 1860.44  | 3025.545 | 1741.416 | 2299.091 | 2207.562 | 2498.379 |
| 22695 | ANKRD46   | 629.4519 | 0.080139 | 0.131584 | 0.609036 | 0.5425   | 0.635487 | 634.2411 | 558.9075 | 644.2472 | 642.8526 | 633.1768 | 663.2864 |
| 26367 | LOC119621 | 1.042471 | 0.080104 | 2.527288 | 0.031696 | 0.974715 | 0.982733 | 1.626259 | 0        | 1.391463 | 2.232127 | 0        | 1.004979 |
| 26368 | LOC103231 | 1.042471 | 0.080104 | 2.527288 | 0.031696 | 0.974715 | 0.982733 | 1.626259 | 0        | 1.391463 | 2.232127 | 0        | 1.004979 |
| 22581 | MTX2      | 1605.129 | 0.079933 | 0.127424 | 0.627305 | 0.530459 | 0.62451  | 1620.296 | 1320.357 | 1743.503 | 1667.399 | 1580.803 | 1698.415 |
| 21411 | TIPRL     | 2389.079 | 0.079932 | 0.098005 | 0.815589 | 0.414735 | 0.514935 | 2257.79  | 2400.948 | 2304.262 | 2526.768 | 2558.376 | 2286.328 |
| 23027 | TRIP4     | 784.4282 | 0.079774 | 0.14303  | 0.557741 | 0.577022 | 0.66618  | 705.7965 | 885.1649 | 699.9058 | 765.6196 | 780.7754 | 869.3072 |
| 21357 | CTNNA1    | 11794.85 | 0.079773 | 0.096905 | 0.823213 | 0.410387 | 0.510846 | 11434.77 | 11940.69 | 11039.17 | 11729.83 | 11262.42 | 13       |



|       |           |          |          |          |            |          |          |          |          |          |          |          |          |
|-------|-----------|----------|----------|----------|------------|----------|----------|----------|----------|----------|----------|----------|----------|
| 22615 | TIMM17A   | 1878.719 | 0.079243 | 0.127257 | 0.6227     | 0.533482 | 0.627133 | 1988.915 | 1523.994 | 1971.007 | 1890.612 | 1888.835 | 2008.954 |
| 25620 | LOC103232 | 26.69837 | 0.079122 | 0.535879 | 0.147648   | 0.88262  | 0.915865 | 23.30971 | 24.08612 | 29.91645 | 17.85702 | 44.92132 | 20.09959 |
| 24720 | LOC10324  | 94.62607 | 0.079113 | 0.26752  | 0.295728   | 0.767438 | 0.825337 | 91.6126  | 88.1333  | 95.3152  | 100.4457 | 104.8164 | 87.43321 |
| 25288 | LOC11962  | 57.01306 | 0.078995 | 0.394134 | 0.200427   | 0.841147 | 0.884255 | 37.94605 | 72.80577 | 54.96278 | 49.10679 | 77.00798 | 50.24897 |
| 24152 | TNFRSF25  | 225.7328 | 0.078921 | 0.206176 | 0.382784   | 0.70188  | 0.772585 | 232.5551 | 200.3527 | 229.5914 | 194.195  | 220.3284 | 277.3743 |
| 27237 | OTOS      | 0.441202 | 0.078594 | 3.993193 | 0.019682   | 0.984297 | NA       | 0        | 1.642235 | 0        | 0        | 0        | 1.004979 |
| 28353 | LOC10321  | 0.441202 | 0.078594 | 3.993193 | 0.019682   | 0.984297 | NA       | 0        | 1.642235 | 0        | 0        | 0        | 1.004979 |
| 29481 | LOC11962  | 0.441202 | 0.078594 | 3.993193 | 0.019682   | 0.984297 | NA       | 0        | 1.642235 | 0        | 0        | 0        | 1.004979 |
| 25078 | LOC11962  | 70.09405 | 0.078562 | 0.336045 | 0.233783   | 0.815153 | 0.864138 | 66.67662 | 52.55153 | 84.87923 | 84.82083 | 66.31243 | 65.32367 |
| 25984 | LOC11962  | 8.243964 | 0.078553 | 0.865345 | 0.090776   | 0.927671 | 0.949127 | 9.215468 | 9.853413 | 4.87012  | 8.928508 | 8.556443 | 8.039836 |
| 26252 | LOC11962  | 2.071215 | 0.07834  | 1.628046 | 0.048119   | 0.961621 | 0.973819 | 2.168345 | 1.094824 | 2.782925 | 2.232127 | 2.139111 | 2.009959 |
| 25703 | LOC10324  | 26.04123 | 0.078198 | 0.582318 | 0.134288   | 0.893175 | 0.923825 | 33.06727 | 17.51718 | 24.3506  | 22.32127 | 44.92132 | 14.06971 |
| 26139 | LOC11962  | 4.145423 | 0.078198 | 1.199384 | 0.065198   | 0.948016 | 0.964192 | 5.420864 | 2.737059 | 4.174388 | 2.232127 | 4.278221 | 6.029877 |
| 25122 | LOC10323  | 91.70343 | 0.078195 | 0.343796 | 0.227447   | 0.820076 | 0.867798 | 106.2489 | 65.14201 | 93.92374 | 102.6778 | 121.9293 | 60.29877 |
| 23734 | RPP38     | 675.977  | 0.078149 | 0.17442  | 0.448051   | 0.654116 | 0.732691 | 596.295  | 818.9281 | 559.368  | 725.4413 | 601.0901 | 754.7396 |
| 22253 | MTCH1     | 6420.302 | 0.077856 | 0.113948 | 0.683259   | 0.494443 | 0.590697 | 6855.766 | 5669.544 | 6222.621 | 6506.65  | 5933.893 | 7333.335 |
| 22403 | MTHFSD    | 1059.143 | 0.077853 | 0.118653 | 0.656141   | 0.511733 | 0.607259 | 1112.361 | 945.3802 | 1036.64  | 1046.868 | 1075.973 | 1137.637 |
| 25454 | CUNH17or  | 33.39788 | 0.077852 | 0.454804 | 0.171177   | 0.864084 | 0.902443 | 26.56223 | 41.05589 | 29.22072 | 40.17829 | 34.22577 | 29.1444  |
| 20776 | PSMB2     | 6964.276 | 0.077821 | 0.085775 | 0.907271   | 0.364264 | 0.46609  | 6689.888 | 6941.729 | 6702.676 | 7178.52  | 6776.703 | 7496.142 |
| 25807 | TRNAD-GU  | 17.27819 | 0.077792 | 0.65164  | 0.119378   | 0.904976 | 0.932258 | 16.80468 | 8.758589 | 25.04633 | 17.85702 | 17.11289 | 18.08963 |
| 22254 | SELENOK   | 1732.981 | 0.077792 | 0.113951 | 0.682677   | 0.494811 | 0.591088 | 1799.185 | 1555.197 | 1698.976 | 1912.933 | 1807.549 | 1624.047 |
| 26065 | LOC11962  | 8.158029 | 0.077777 | 1.027344 | 0.075707   | 0.939652 | 0.958361 | 11.38381 | 7.663765 | 4.174388 | 4.464254 | 19.252   | 2.009959 |
| 23235 | ARHGAP21  | 6156.84  | 0.077688 | 0.148337 | 0.523726   | 0.600469 | 0.687044 | 5069.05  | 7691.683 | 5213.115 | 6305.759 | 6137.109 | 6524.327 |
| 22618 | SLC22A5   | 740.1988 | 0.077596 | 0.124726 | 0.622128   | 0.533858 | 0.627492 | 738.3216 | 695.213  | 731.2137 | 700.8879 | 761.5234 | 814.0334 |
| 22271 | RFT1      | 1098.205 | 0.077578 | 0.114299 | 0.678726   | 0.497311 | 0.593643 | 1143.802 | 1019.281 | 1044.989 | 1060.26  | 1155.12  | 1165.776 |
| 21937 | HMGXB3    | 3996.283 | 0.077432 | 0.104968 | 0.737678   | 0.46071  | 0.558325 | 4022.823 | 3767.836 | 3884.964 | 3948.633 | 3762.696 | 4590.746 |
| 25748 | LOC11962  | 16.93021 | 0.077388 | 0.604938 | 0.127927   | 0.898207 | 0.927402 | 15.7205  | 14.23271 | 19.48048 | 20.08914 | 14.97377 | 17.08465 |
| 26388 | LOC11962  | 1.414166 | 0.077317 | 2.579614 | 0.029972   | 0.976089 | 0.983376 | 0.542086 | 0        | 3.478657 | 4.464254 | 0        | 0        |
| 20731 | TXNRD1    | 41159.35 | 0.077275 | 0.084592 | 0.913509   | 0.360975 | 0.462893 | 40542.64 | 41615.89 | 38018.24 | 41551.04 | 40797.12 | 44431.15 |
| 26296 | CLDN34    | 2.061466 | 0.077264 | 1.868031 | 0.041361   | 0.967008 | 0.977656 | 0.542086 | 3.831883 | 1.391463 | 4.464254 | 2.139111 | 0        |
| 23145 | PAK4      | 1317.638 | 0.077118 | 0.143456 | 0.537575   | 0.590871 | 0.6787   | 1347.627 | 1086.612 | 1419.292 | 1258.92  | 1240.684 | 1552.693 |
| 23142 | SPRED3    | 750.3241 | 0.076915 | 0.142942 | 0.538808   | 0.590522 | 0.678378 | 673.8134 | 853.415  | 663.7277 | 785.7087 | 744.4105 | 780.869  |
| 26360 | TFEC      | 1.362749 | 0.076892 | 2.331783 | 0.032976   | 0.973694 | 0.982005 | 2.710432 | 1.094824 | 0        | 2.232127 | 2.139111 | 0        |
| 21719 | MET       | 21286.37 | 0.076786 | 0.099014 | 0.775506   | 0.438041 | 0.536181 | 20168.32 | 22465.23 | 19532.66 | 21517.7  | 20325.83 | 23708.47 |
| 22755 | EPB41L3   | 5070.964 | 0.076709 | 0.127764 | 0.600396   | 0.548242 | 0.64052  | 4576.293 | 5882.487 | 4352.495 | 5182.999 | 4840.807 | 5590.701 |
| 22717 | PRDX6     | 13373.31 | 0.0763   | 0.125892 | 0.606076   | 0.544465 | 0.63717  | 14758.3  | 10580.38 | 13724    | 13575.8  | 13010.07 | 14591.3  |
| 20853 | NAP1L4    | 8110.527 | 0.076258 | 0.084915 | 0.89806    | 0.369153 | 0.470625 | 8084.134 | 7959.368 | 7650.262 | 8196.37  | 8021.665 | 8751.361 |
| 22140 | ARID1B    | 3064.046 | 0.076247 | 0.108727 | 0.701275   | 0.483132 | 0.580129 | 2736.452 | 3341.402 | 2874.066 | 3113.817 | 3033.259 | 3285.278 |
| 21696 | ARGFGEF2  | 6790.673 | 0.076206 | 0.097962 | 0.777907   | 0.436624 | 0.535013 | 6431.313 | 7113.617 | 6294.977 | 6825.844 | 6567.07  | 7511.217 |
| 24446 | CAP2      | 247.4465 | 0.076108 | 0.225237 | 0.3379     | 0.735438 | 0.799759 | 211.4137 | 316.404  | 194.1091 | 256.6946 | 258.8324 | 247.2249 |
| 22594 | ZNF644    | 4311.698 | 0.075979 | 0.121474 | 0.625474   | 0.53166  | 0.625572 | 3903.022 | 4971.594 | 3719.38  | 4439.701 | 4389.455 | 4447.034 |
| 22294 | EDC4      | 3820.766 | 0.075953 | 0.112485 | 0.675224   | 0.499533 | 0.59568  | 3891.096 | 3467.306 | 3809.825 | 3874.972 | 3484.611 | 4396.785 |
| 22153 | AP1B1     | 5198.52  | 0.075943 | 0.108654 | 0.69894    | 0.48459  | 0.581516 | 5398.096 | 4691.319 | 5103.19  | 5223.177 | 4842.947 | 5932.394 |
| 22015 | SPATA20   | 2789.23  | 0.075904 | 0.104929 | 0.723385   | 0.469443 | 0.566893 | 2754.341 | 2641.809 | 2759.271 | 2785.694 | 2622.55  | 3171.715 |
| 24364 | LOC10324  | 179.9058 | 0.075903 | 0.215644 | 0.351981   | 0.724853 | 0.79093  | 185.3935 | 181.1933 | 158.6268 | 214.2842 | 154.016  | 185.9212 |
| 23894 | ZNF283    | 380.0451 | 0.075891 | 0.179067 | 0.423813   | 0.671703 | 0.747351 | 403.8543 | 379.3564 | 331.1681 | 328.1227 | 376.4835 | 461.2856 |
| 22180 | PREB      | 2202.074 | 0.075738 | 0.109027 | 0.694672   | 0.487261 | 0.584032 | 2333.14  | 1973.967 | 2130.329 | 2171.86  | 2186.171 | 2416.976 |
| 23631 | TMEM243   | 472.5567 | 0.075638 | 0.163122 | 0.463693   | 0.642868 | 0.723122 | 483.541  | 395.7787 | 505.101  | 437.4969 | 472.7435 | 540.679  |
| 21541 | SMIM12    | 2002.132 | 0.075626 | 0.094718 | 0.798439   | 0.424616 | 0.524043 | 1896.218 | 1927.984 | 2023.187 | 2078.11  | 2081.355 | 2005.939 |
| 25819 | LOC11962  | 19.10335 | 0.075552 | 0.640101 | 0.118031   | 0.906043 | 0.932924 | 18.97302 | 17.51718 | 18.78475 | 35.71403 | 8.556443 | 15.07469 |
| 22210 | ACOT7     | 2705.668 | 0.075508 | 0.10933  | 0.690642   | 0.489791 | 0.586245 | 2778.193 | 2360.987 | 2770.402 | 2729.891 | 2626.828 | 2967.704 |
| 23501 | ZNF2      | 360.0467 | 0.075406 | 0.155637 | 0.484503   | 0.628029 | 0.710444 | 347.4774 | 371.6926 | 334.6468 | 363.8367 | 348.675  | 393.952  |
| 22764 | SLC15A4   | 1722.396 | 0.075397 | 0.125801 | 0.599335   | 0.548949 | 0.641092 | 1789.969 | 1516.331 | 1733.067 | 1600.435 | 1685.619 | 2008.954 |
| 21466 | PIGK      | 4216.932 | 0.07534  | 0.093289 | 0.8076     | 0.419321 | 0.51918  | 3919.827 | 4381.484 | 4021.327 | 4127.203 | 4425.82  | 4425.93  |
| 22097 | TGS1      | 1967.478 | 0.075265 | 0.105986 | 0.71014    | 0.477618 | 0.574624 | 1922.238 | 2075.786 | 1749.764 | 2049.093 | 1982.956 | 2025.034 |
| 22440 | KMT2B     | 1803.426 | 0.075198 | 0.115592 | 0.650547   | 0.515339 | 0.610607 | 1799.098 | 1967.945 | 1724.022 | 1830.344 | 1809.688 | 1909.461 |
| 21720 | MAPK8IP1  | 2262.465 | 0.075191 | 0.097    | 0.775169   | 0.43824  | 0.5364   | 2135.82  | 2266.832 | 2212.426 | 2314.716 | 2196.867 | 2448.13  |
| 21927 | LPGAT1    | 4085.088 | 0.075079 | 0.101387 | 0.740525   | 0.458981 | 0.556484 | 3807.073 | 4362.872 | 3769.473 | 4218.72  | 3961.633 | 4390.755 |
| 23958 | FREM2     | 244.5807 | 0.074946 | 0.181165 | 0.413689   | 0.679102 | 0.753565 | 232.013  | 253.9991 | 227.5042 | 238.8376 | 275.9453 | 239.1851 |
| 26094 | LOC11962  | 7.474045 | 0.074883 | 1.041968 | 0.071867   | 0.942708 | 0.960446 | 6.505036 | 11.49565 | 3.478657 | 2.232127 | 17.11289 | 4.019918 |
| 22487 | IPMK      | 1599.674 | 0.074815 | 0.116753 | 0.640798   | 0.521654 | 0.616719 | 1431.65  | 1756.645 | 1487.474 | 1595.971 | 1644.976 | 1681.331 |
| 20924 | RIOK3     | 4231.602 | 0.074754 | 0.084241 | 0.887376   | 0.374876 | 0.476306 | 4019.57  | 4122.558 | 4224.481 | 4408.451 | 4258.969 | 4355.581 |
| 23042 | MVK       | 736.7479 | 0.074751 | 0.134602 | 0.555346   | 0.578658 | 0.667634 | 763.7997 | 682.0751 | 711.7332 | 747.7625 | 675.959  | 839.1579 |
| 24229 | LOC10322  | 216.3568 | 0.074751 | 0.201905 | 0.370228   | 0.711212 | 0.78037  | 193.5248 | 242.5034 | 194.8048 | 214.2842 | 245.9977 | 207.0258 |
| 26334 | LOC10321  | 1.376048 | 0.074687 | 2.059008 | 0.036273   | 0.971064 | 0.98032  | 2.168345 | 0.547412 | 1.391463 | 0        | 2.139111 | 2.009959 |
| 26119 | LOC11962  | 5.783589 | 0.074686 | 1.08977  | 0.068533   | 0.945361 | 0.962228 | 4.336691 | 6.02153  | 6.261582 | 2.232127 | 12.83466 | 3.014938 |
| 23674 | EID2B     | 384.0255 | 0.074456 | 0.162746 | 0.457496   | 0.647315 | 0.72691  | 369.7029 | 423.1493 | 329.7767 | 383.9258 | 393.5964 | 404.0017 |
| 24936 | GABRG3    | 111.406  | 0.074387 | 0.289499 | 0.256951   | 0.797217 | 0.849936 | 86.73382 | 142.3271 | 95.3152  | 122.767  | 119.7902 | 101.5029 |
| 22679 | ATXN7     | 3023.606 | 0.074378 | 0.121842 | 0.610446   | 0.541566 | 0.634821 | 2751.088 | 3455.811 | 2631.256 | 3004.443 | 3093.154 | 3205.885 |
| 25927 | LOC10323  | 13.76658 | 0.074294 | 0.740977 | 0.100265   | 0.920134 | 0.943442 | 15.7205  | 6.568942 | 17.39328 | 15.62489 | 19.252   | 8.039836 |
| 22503 | COL7A1    | 67563.6  | 0.074277 | 0.116253 | 0.638926</ |          |          |          |          |          |          |          |          |



|       |           |          |          |          |          |          |          |          |          |          |          |          |          |
|-------|-----------|----------|----------|----------|----------|----------|----------|----------|----------|----------|----------|----------|----------|
| 24374 | LOC119621 | 174.4647 | 0.073794 | 0.210486 | 0.350586 | 0.725899 | 0.791746 | 168.0468 | 188.3097 | 152.3652 | 185.2665 | 183.9635 | 168.8366 |
| 23699 | LPAR5     | 338.7199 | 0.073789 | 0.162662 | 0.453637 | 0.65009  | 0.729256 | 308.4471 | 366.7659 | 314.4706 | 345.9797 | 352.9533 | 343.703  |
| 21204 | PDGFC     | 4954.98  | 0.073765 | 0.086845 | 0.849381 | 0.395669 | 0.496079 | 4834.326 | 4945.866 | 4709.406 | 5033.446 | 4881.451 | 5325.386 |
| 21726 | SDHA      | 8921.694 | 0.073566 | 0.095065 | 0.773857 | 0.439015 | 0.537201 | 8804.567 | 9079.92  | 8204.76  | 8959.758 | 8582.112 | 9899.048 |
| 24176 | LOC119621 | 193.3059 | 0.073537 | 0.194451 | 0.37818  | 0.705297 | 0.775576 | 196.2353 | 188.3097 | 181.5859 | 196.4272 | 188.2417 | 209.0357 |
| 22112 | MRPS9     | 2022.423 | 0.073509 | 0.104059 | 0.706421 | 0.479926 | 0.57701  | 1849.599 | 2149.139 | 1912.566 | 2111.592 | 2068.52  | 2043.123 |
| 25745 | MPP4      | 25.42639 | 0.073269 | 0.571611 | 0.12818  | 0.898006 | 0.927306 | 30.35684 | 22.44388 | 20.17621 | 29.01765 | 38.50399 | 12.05975 |
| 25638 | LOC103218 | 31.9004  | 0.07324  | 0.507547 | 0.144303 | 0.885262 | 0.917961 | 28.18849 | 33.93953 | 29.91645 | 26.78552 | 53.47777 | 19.09461 |
| 25534 | LOC103221 | 33.50007 | 0.073239 | 0.457647 | 0.160035 | 0.872854 | 0.908781 | 28.18849 | 33.93953 | 34.78657 | 46.87467 | 32.08666 | 25.12449 |
| 23687 | SF3A1     | 3515.555 | 0.073134 | 0.160676 | 0.455164 | 0.648991 | 0.728392 | 2722.9   | 4472.355 | 3085.569 | 3504.439 | 3493.168 | 3814.902 |
| 25175 | LOC119615 | 69.14276 | 0.072977 | 0.334937 | 0.217883 | 0.82752  | 0.873868 | 79.14461 | 65.68942 | 57.7457  | 51.33892 | 85.56443 | 75.37346 |
| 23967 | PIGH      | 313.1937 | 0.072935 | 0.177028 | 0.411996 | 0.680342 | 0.754659 | 297.6054 | 271.5163 | 346.4742 | 352.6761 | 297.3364 | 313.5536 |
| 21708 | BIRC6     | 15473.88 | 0.072908 | 0.093893 | 0.776498 | 0.437455 | 0.53571  | 14776.73 | 16321.63 | 14155.35 | 15403.91 | 15350.26 | 16835.42 |
| 25302 | LOC103220 | 49.72216 | 0.072834 | 0.366694 | 0.198623 | 0.842557 | 0.885336 | 50.95612 | 39.96106 | 54.26705 | 53.57105 | 51.33866 | 48.23901 |
| 24408 | ZMYND12   | 225.7737 | 0.072615 | 0.21011  | 0.345604 | 0.729641 | 0.794719 | 247.7335 | 181.7407 | 232.3743 | 196.4272 | 248.1368 | 248.2299 |
| 22606 | FBXW7     | 2494.726 | 0.072457 | 0.116193 | 0.623594 | 0.532894 | 0.626692 | 2271.884 | 2758.408 | 2266.693 | 2377.215 | 2695.279 | 2598.877 |
| 23599 | PDLIM1    | 779.1251 | 0.072274 | 0.154303 | 0.468388 | 0.639507 | 0.720411 | 676.5238 | 925.6734 | 676.2509 | 783.4766 | 812.8621 | 799.9637 |
| 22184 | ARCN1     | 9458.662 | 0.072239 | 0.10404  | 0.694342 | 0.487468 | 0.584175 | 8638.146 | 10413.41 | 8616.633 | 9627.164 | 9341.496 | 10115.12 |
| 21796 | RHEB      | 8892.851 | 0.072105 | 0.094819 | 0.760444 | 0.446989 | 0.545203 | 8406.133 | 9227.721 | 8371.04  | 9314.666 | 9623.859 | 8413.688 |
| 24519 | USP49     | 270.1669 | 0.071854 | 0.219149 | 0.327878 | 0.743004 | 0.80561  | 254.2385 | 271.5163 | 260.8993 | 252.2303 | 370.0661 | 212.0507 |
| 25118 | WDR31     | 76.74972 | 0.071762 | 0.315027 | 0.227796 | 0.819805 | 0.86765  | 67.21871 | 78.8273  | 77.92191 | 62.49956 | 102.6773 | 71.35354 |
| 25387 | LOC103231 | 52.71224 | 0.071595 | 0.390762 | 0.18322  | 0.854625 | 0.894884 | 53.66655 | 48.17224 | 51.48412 | 80.35657 | 36.36488 | 46.22906 |
| 25478 | LOC103214 | 42.47959 | 0.071387 | 0.424662 | 0.168103 | 0.866502 | 0.904151 | 41.74065 | 29.01283 | 52.87558 | 46.87467 | 49.19955 | 35.17428 |
| 21998 | MAZ       | 4804.184 | 0.071318 | 0.09796  | 0.728034 | 0.466593 | 0.563886 | 4493.896 | 4949.15  | 4619.656 | 4870.501 | 4575.558 | 5316.341 |
| 24971 | LOC119621 | 291.8846 | 0.071246 | 0.283268 | 0.251514 | 0.801417 | 0.853216 | 198.4036 | 433.5502 | 219.8511 | 319.1942 | 340.1186 | 240.1901 |
| 25416 | LOC103241 | 62.32948 | 0.071096 | 0.398735 | 0.178304 | 0.858484 | 0.897869 | 77.51835 | 41.05589 | 62.61582 | 53.57105 | 91.98176 | 47.23404 |
| 22040 | FMNL3     | 2789.98  | 0.071025 | 0.098862 | 0.718421 | 0.472498 | 0.569935 | 2770.603 | 2718.994 | 2681.349 | 2763.373 | 2693.14  | 3112.421 |
| 24599 | FBXO41    | 163.7899 | 0.071021 | 0.224363 | 0.316545 | 0.751589 | 0.812268 | 163.168  | 135.2107 | 182.2816 | 158.481  | 164.7115 | 178.8863 |
| 23956 | ANAPC10   | 869.7227 | 0.070985 | 0.171553 | 0.413779 | 0.679036 | 0.753524 | 737.2375 | 1081.138 | 723.5606 | 919.6363 | 949.7651 | 806.9985 |
| 20631 | ARF4      | 12142.29 | 0.070949 | 0.076222 | 0.930816 | 0.351948 | 0.453519 | 11963.3  | 11725.01 | 11842.04 | 12566.87 | 12398.29 | 12358.23 |
| 22545 | SC5D      | 5646.438 | 0.070941 | 0.112002 | 0.63339  | 0.526479 | 0.620823 | 5072.844 | 6340.671 | 5105.973 | 5968.708 | 5859.024 | 5531.407 |
| 25744 | TMEM88    | 23.79297 | 0.070882 | 0.552061 | 0.128394 | 0.897837 | 0.927177 | 17.34676 | 32.84471 | 18.78475 | 29.01765 | 25.66933 | 19.09461 |
| 22218 | CHMP1B    | 2590.932 | 0.070833 | 0.102775 | 0.689206 | 0.490693 | 0.58714  | 2420.958 | 2735.417 | 2427.407 | 2736.588 | 2485.647 | 2739.574 |
| 22608 | ATP5M1    | 4495.201 | 0.070806 | 0.113607 | 0.623257 | 0.533115 | 0.626896 | 4508.532 | 3820.934 | 4821.418 | 4783.448 | 4778.773 | 4258.098 |
| 24332 | HOXA3     | 227.8574 | 0.070744 | 0.198028 | 0.357242 | 0.720911 | 0.787681 | 215.2083 | 212.9432 | 242.1145 | 198.6593 | 228.8848 | 269.3345 |
| 25670 | ALB       | 32.25337 | 0.070696 | 0.506706 | 0.139521 | 0.889039 | 0.920728 | 31.9831  | 30.65506 | 30.61218 | 24.5534  | 55.61688 | 20.09959 |
| 22862 | ARFGEF3   | 1856.972 | 0.070672 | 0.121003 | 0.584048 | 0.559188 | 0.65025  | 1761.781 | 1907.183 | 1773.419 | 1801.326 | 1711.289 | 2186.835 |
| 23117 | LOC103231 | 629.5751 | 0.070404 | 0.130169 | 0.540869 | 0.588598 | 0.676899 | 600.0896 | 649.2304 | 596.2418 | 631.6919 | 611.7857 | 688.4109 |
| 22740 | SMG9      | 1288.011 | 0.070383 | 0.116779 | 0.602705 | 0.546705 | 0.639144 | 1177.412 | 1363.603 | 1232.836 | 1227.67  | 1315.553 | 1410.991 |
| 23850 | CCDC92    | 1394.851 | 0.070055 | 0.162817 | 0.430266 | 0.667002 | 0.743489 | 1163.317 | 1751.718 | 1168.133 | 1475.436 | 1341.222 | 1469.28  |
| 22890 | STX6      | 1090.131 | 0.069975 | 0.120494 | 0.580733 | 0.561421 | 0.652048 | 1076.584 | 1139.711 | 978.1983 | 1040.171 | 1110.198 | 1195.926 |
| 22508 | LUC7L     | 2486.891 | 0.069956 | 0.109623 | 0.63815  | 0.523376 | 0.618172 | 2381.928 | 2706.951 | 2188.771 | 2584.803 | 2560.515 | 2498.379 |
| 22410 | NXPE3     | 2613.31  | 0.069931 | 0.106794 | 0.654815 | 0.512587 | 0.608082 | 2634.54  | 2409.707 | 2613.167 | 2575.875 | 2489.925 | 2956.65  |
| 23536 | CCDC130   | 420.3989 | 0.069724 | 0.145849 | 0.478052 | 0.632613 | 0.714566 | 429.3324 | 390.852  | 412.5687 | 410.7114 | 425.683  | 453.2457 |
| 23962 | RAB1F     | 291.936  | 0.069678 | 0.168736 | 0.412943 | 0.679649 | 0.754023 | 301.4    | 275.8956 | 279.684  | 281.248  | 288.7799 | 324.6084 |
| 21251 | EID1      | 7683.49  | 0.069598 | 0.082675 | 0.841829 | 0.399884 | 0.500278 | 7516.57  | 7789.123 | 7188.992 | 7939.676 | 7739.302 | 7927.278 |
| 25333 | LOC103221 | 56.84352 | 0.069557 | 0.358677 | 0.193927 | 0.846233 | 0.888055 | 48.78777 | 58.57306 | 59.13717 | 42.41041 | 74.86887 | 57.28383 |
| 22278 | SSH1      | 3109.258 | 0.069232 | 0.102272 | 0.676942 | 0.498443 | 0.59478  | 2915.883 | 3297.061 | 2895.634 | 3051.318 | 3103.85  | 3391.806 |
| 21597 | COPB1     | 10499.67 | 0.069224 | 0.08754  | 0.790769 | 0.429079 | 0.528178 | 10735.48 | 9863.813 | 10150.02 | 10524.48 | 10346.88 | 11377.37 |
| 23137 | SLC7A6OS  | 661.9806 | 0.069223 | 0.128445 | 0.538929 | 0.589936 | 0.677851 | 627.736  | 697.4027 | 614.3308 | 674.1023 | 658.8461 | 699.4657 |
| 22704 | RIN2      | 904.4754 | 0.069066 | 0.113566 | 0.608161 | 0.543081 | 0.635914 | 863.0015 | 928.4104 | 857.8368 | 910.7078 | 926.2349 | 940.6608 |
| 25754 | PCDHB4    | 24.06663 | 0.069019 | 0.544711 | 0.126707 | 0.899172 | 0.928152 | 18.43094 | 26.82318 | 25.04633 | 15.62489 | 36.36488 | 22.10955 |
| 23506 | STXBP1    | 683.1532 | 0.069005 | 0.142809 | 0.483196 | 0.628957 | 0.711343 | 600.0896 | 758.7128 | 644.2472 | 683.0309 | 663.1243 | 749.7147 |
| 22915 | RAMAC     | 1469.325 | 0.068928 | 0.119433 | 0.577121 | 0.563858 | 0.654164 | 1514.589 | 1260.142 | 1531.305 | 1479.9   | 1448.178 | 1581.838 |
| 25651 | LOC119621 | 28.0492  | 0.068661 | 0.484555 | 0.141698 | 0.887318 | 0.919627 | 21.14137 | 29.56024 | 31.30791 | 33.4819  | 25.66933 | 27.13445 |
| 24594 | HARB11    | 162.7882 | 0.068634 | 0.216416 | 0.317139 | 0.751138 | 0.811947 | 177.2622 | 141.2322 | 157.931  | 169.6417 | 166.8506 | 163.8117 |
| 22840 | NDUFAF3   | 2068.573 | 0.068451 | 0.116627 | 0.586927 | 0.557252 | 0.648623 | 2197.076 | 1802.08  | 2064.235 | 2075.878 | 1980.816 | 2291.353 |
| 23229 | MBNL1     | 8799.183 | 0.068242 | 0.129994 | 0.524963 | 0.599609 | 0.686248 | 7690.579 | 10520.71 | 7562.6   | 8781.188 | 8999.239 | 9240.786 |
| 26206 | LOC119621 | 5.526375 | 0.068197 | 1.237073 | 0.055128 | 0.956036 | 0.969826 | 4.336691 | 4.379295 | 6.957314 | 8.928508 | 8.556443 | 0        |
| 26024 | REELD1    | 14.59278 | 0.068194 | 0.826266 | 0.082532 | 0.934224 | 0.954363 | 14.09425 | 16.42235 | 11.1317  | 26.78552 | 17.11289 | 2.009959 |
| 26295 | RFPL4B    | 2.4224   | 0.068096 | 1.649234 | 0.041289 | 0.967065 | 0.977656 | 4.336691 | 1.642235 | 1.391463 | 0        | 2.139111 | 5.024897 |
| 22035 | CNPY3     | 2546.536 | 0.067989 | 0.094544 | 0.719121 | 0.472067 | 0.569543 | 2628.035 | 2375.22  | 2458.019 | 2602.66  | 2554.098 | 2661.186 |
| 22569 | KCTD10    | 2648.131 | 0.067976 | 0.107931 | 0.629808 | 0.52882  | 0.62292  | 2415.537 | 2896.356 | 2446.887 | 2665.16  | 2676.027 | 2788.818 |
| 24170 | ZNF668    | 369.6129 | 0.067953 | 0.178939 | 0.379755 | 0.704127 | 0.774492 | 382.713  | 295.6024 | 405.6114 | 399.5507 | 342.2577 | 391.942  |
| 23807 | SETMAR    | 435.9715 | 0.067823 | 0.155726 | 0.435524 | 0.663182 | 0.740567 | 388.6759 | 450.5199 | 441.7894 | 404.015  | 436.3786 | 494.4499 |
| 23715 | TMEM138   | 543.1072 | 0.067711 | 0.149892 | 0.451731 | 0.651463 | 0.730241 | 481.3727 | 606.5323 | 505.101  | 531.2462 | 545.4732 | 588.918  |
| 22283 | MED7      | 1608.66  | 0.067675 | 0.100047 | 0.676435 | 0.498765 | 0.595004 | 1583.976 | 1520.163 | 1609.922 | 1698.649 | 1567.968 | 1671.281 |
| 25893 | LOC119615 | 14.85204 | 0.067675 | 0.643604 | 0.10515  | 0.916257 | 0.940744 | 14.09425 | 17.51718 | 11.82743 | 15.62489 | 14.97377 | 15.07469 |
| 22789 | GTF3C1    | 9529.445 | 0.067606 | 0.113682 | 0.594696 | 0.552047 | 0.644002 | 8747.106 | 10533.3  | 8643.767 | 9557.968 | 8954.317 | 10740.22 |
| 23554 | LOC103221 | 621.3428 | 0.067559 | 0.141834 | 0.47632  | 0.633846 | 0        |          |          |          |          |          |          |



|       |           |          |          |          |          |          |          |          |          |          |          |          |          |
|-------|-----------|----------|----------|----------|----------|----------|----------|----------|----------|----------|----------|----------|----------|
| 23524 | LOC103245 | 471.6937 | 0.066842 | 0.1394   | 0.479502 | 0.631581 | 0.713758 | 467.8205 | 456.5415 | 459.1827 | 444.1933 | 506.9692 | 495.4549 |
| 25908 | LOC119624 | 15.90052 | 0.066597 | 0.643276 | 0.103528 | 0.917544 | 0.94152  | 14.63633 | 10.94824 | 20.87194 | 15.62489 | 19.252   | 14.06971 |
| 23465 | FAM104B   | 1687.892 | 0.066508 | 0.135664 | 0.49024  | 0.623964 | 0.706929 | 1486.943 | 1984.915 | 1473.559 | 1727.666 | 1766.905 | 1687.361 |
| 25743 | LOC103230 | 23.52844 | 0.066474 | 0.517775 | 0.128383 | 0.897846 | 0.927177 | 22.76763 | 19.15941 | 27.13352 | 22.32127 | 25.66933 | 24.11951 |
| 23276 | NDOR1     | 985.8118 | 0.066291 | 0.128151 | 0.517294 | 0.604951 | 0.690953 | 1016.954 | 862.1736 | 1015.072 | 955.3503 | 966.878  | 1098.443 |
| 23394 | EDC3      | 1005.889 | 0.066288 | 0.13265  | 0.499718 | 0.617274 | 0.701442 | 987.1393 | 1052.126 | 914.8868 | 982.1359 | 926.2349 | 1172.811 |
| 23329 | CUNH15or  | 1174.474 | 0.066246 | 0.130053 | 0.509381 | 0.610485 | 0.69569  | 1102.604 | 1222.918 | 1122.215 | 1227.67  | 1026.773 | 1344.663 |
| 26325 | LOC103235 | 2.077758 | 0.066234 | 1.752151 | 0.037801 | 0.969846 | 0.979425 | 1.084173 | 3.831883 | 1.391463 | 0        | 2.139111 | 4.019918 |
| 24117 | TMEM208   | 951.4625 | 0.066227 | 0.17071  | 0.387948 | 0.698055 | 0.76949  | 1092.304 | 696.3078 | 1003.245 | 937.4933 | 909.122  | 1070.303 |
| 25867 | TSSK6     | 18.23328 | 0.065853 | 0.6062   | 0.108632 | 0.913494 | 0.938851 | 22.76763 | 15.87494 | 14.61036 | 13.39276 | 25.66933 | 17.08465 |
| 22018 | SNX3      | 7105.442 | 0.06585  | 0.091057 | 0.72317  | 0.469576 | 0.566976 | 6549.488 | 7455.749 | 6822.342 | 7189.681 | 7523.252 | 7092.14  |
| 23379 | TOP2B     | 18826.22 | 0.065768 | 0.130947 | 0.50225  | 0.615492 | 0.699895 | 16625.25 | 22602.09 | 15965.64 | 18964.15 | 18608.12 | 20192.05 |
| 25609 | PURG      | 38.93275 | 0.06563  | 0.438999 | 0.149498 | 0.881161 | 0.914743 | 41.74065 | 41.05589 | 29.91645 | 42.41041 | 51.33866 | 27.13445 |
| 25950 | LOC119620 | 15.50358 | 0.065608 | 0.684865 | 0.095797 | 0.923682 | 0.946284 | 16.80468 | 8.758589 | 19.48048 | 13.39276 | 23.53022 | 11.05477 |
| 26053 | MORC1     | 9.630358 | 0.065561 | 0.848872 | 0.077234 | 0.938438 | 0.957601 | 7.589209 | 8.211177 | 11.82743 | 11.16063 | 14.97377 | 4.019918 |
| 26275 | LOC119623 | 3.763447 | 0.06552  | 1.489362 | 0.043992 | 0.964911 | 0.976125 | 3.252518 | 7.663765 | 0        | 2.232127 | 6.417332 | 3.014938 |
| 22468 | ZC3HAV1   | 4325.541 | 0.065517 | 0.101487 | 0.645571 | 0.518558 | 0.613577 | 4149.129 | 4578.005 | 3960.103 | 4207.559 | 4303.891 | 4754.558 |
| 23237 | LOC103247 | 1001.154 | 0.06526  | 0.124699 | 0.523344 | 0.600735 | 0.687289 | 948.1091 | 1078.949 | 910.7124 | 1040.171 | 947.626  | 1081.358 |
| 25764 | PTCH2     | 25.97965 | 0.065195 | 0.520402 | 0.125279 | 0.900303 | 0.928958 | 28.18849 | 17.51718 | 29.91645 | 33.4819  | 25.66933 | 21.10457 |
| 24762 | LOC119622 | 148.0252 | 0.065148 | 0.225947 | 0.288332 | 0.773093 | 0.830008 | 149.6158 | 132.4737 | 153.0609 | 160.7131 | 130.4858 | 161.8017 |
| 23284 | TMEM1791  | 1487.188 | 0.064983 | 0.12589  | 0.516192 | 0.60572  | 0.691594 | 1286.913 | 1677.27  | 1397.724 | 1511.15  | 1497.377 | 1552.693 |
| 24330 | CFAP410   | 482.3295 | 0.064892 | 0.181566 | 0.357402 | 0.720791 | 0.787597 | 522.5713 | 361.8392 | 531.5388 | 513.3892 | 447.0741 | 517.5644 |
| 23614 | HEBP1     | 460.9631 | 0.064853 | 0.138958 | 0.466712 | 0.640706 | 0.721317 | 439.632  | 439.0243 | 473.7931 | 459.8182 | 479.1608 | 474.3503 |
| 22509 | CANT1     | 1936.465 | 0.064812 | 0.101567 | 0.638122 | 0.523394 | 0.618172 | 1911.397 | 1825.071 | 1947.352 | 1984.361 | 1848.192 | 2102.417 |
| 26277 | TRNAR-UC  | 3.14449  | 0.064675 | 1.468095 | 0.044054 | 0.964862 | 0.976125 | 4.878777 | 2.189647 | 2.087194 | 6.696381 | 0        | 3.014938 |
| 22576 | IPO8      | 4367.975 | 0.064569 | 0.102677 | 0.628856 | 0.529444 | 0.623461 | 4100.883 | 4669.97  | 4044.982 | 4234.345 | 4365.925 | 4791.742 |
| 22815 | RAB35     | 1579.045 | 0.064457 | 0.109282 | 0.589823 | 0.555309 | 0.647049 | 1584.518 | 1491.15  | 1561.917 | 1571.417 | 1499.517 | 1765.749 |
| 24173 | PLSCR3    | 445.8275 | 0.06433  | 0.169708 | 0.379063 | 0.704641 | 0.77495  | 380.0025 | 499.787  | 430.6577 | 464.2824 | 395.7355 | 504.4997 |
| 22643 | ECHS1     | 4678.361 | 0.064264 | 0.104182 | 0.616846 | 0.537336 | 0.630883 | 4898.292 | 4032.235 | 4794.285 | 4689.699 | 4757.382 | 4898.27  |
| 25443 | LOC103224 | 58.34793 | 0.064034 | 0.368926 | 0.17357  | 0.862203 | 0.900903 | 60.17159 | 49.26706 | 60.52863 | 84.82083 | 47.06043 | 48.23901 |
| 23355 | DEXI      | 1234.574 | 0.063967 | 0.126582 | 0.505339 | 0.613321 | 0.698143 | 1296.671 | 1114.53  | 1216.834 | 1185.259 | 1170.094 | 1424.056 |
| 25894 | LOC103218 | 20.79432 | 0.063835 | 0.608678 | 0.104875 | 0.916475 | 0.940822 | 19.51511 | 18.06459 | 22.2634  | 33.4819  | 21.39111 | 10.04979 |
| 22351 | ALKBH5    | 5875.779 | 0.063569 | 0.095334 | 0.666798 | 0.504901 | 0.600568 | 5713.59  | 5817.345 | 5716.129 | 5881.655 | 5555.47  | 6568.546 |
| 21950 | CNNT1     | 5011.619 | 0.063525 | 0.086283 | 0.736241 | 0.461584 | 0.559053 | 4936.238 | 5095.309 | 4671.836 | 5024.518 | 5219.43  | 5122.38  |
| 22798 | TTC5      | 1345.451 | 0.06331  | 0.106743 | 0.59311  | 0.553108 | 0.644985 | 1361.721 | 1246.457 | 1339.283 | 1444.186 | 1311.275 | 1369.787 |
| 26389 | LOC103247 | 1.709296 | 0.063295 | 2.125535 | 0.029778 | 0.976244 | 0.983495 | 0        | 2.189647 | 2.782925 | 0        | 4.278221 | 1.004979 |
| 22761 | TMEM25    | 1999.26  | 0.062958 | 0.105005 | 0.599576 | 0.548789 | 0.640989 | 1980.784 | 1930.174 | 1962.658 | 2004.45  | 1882.417 | 2235.074 |
| 22736 | TJAP1     | 1786.999 | 0.062789 | 0.104108 | 0.603117 | 0.546431 | 0.638937 | 1746.06  | 1755.002 | 1749.764 | 1765.612 | 1717.706 | 1987.849 |
| 22586 | SLC25A40  | 1587.709 | 0.062748 | 0.100209 | 0.626172 | 0.531202 | 0.625245 | 1535.731 | 1564.503 | 1563.308 | 1613.828 | 1544.438 | 1704.445 |
| 25624 | CYGB      | 40.16095 | 0.062655 | 0.427557 | 0.146542 | 0.883493 | 0.916628 | 37.40396 | 33.93953 | 45.22254 | 33.33892 | 44.92132 | 28.13943 |
| 23883 | KMT2A     | 4132.526 | 0.062645 | 0.147162 | 0.425686 | 0.670336 | 0.746199 | 3468.269 | 5101.878 | 3560.753 | 3966.49  | 4139.179 | 4558.587 |
| 25040 | PKD1L2    | 135.1064 | 0.062427 | 0.260962 | 0.239218 | 0.810937 | 0.86099  | 149.6158 | 107.8401 | 139.1463 | 109.3742 | 168.9897 | 135.6722 |
| 25854 | TKTL1     | 21.35011 | 0.062396 | 0.56384  | 0.110663 | 0.911883 | 0.93763  | 17.88885 | 23.53871 | 20.87194 | 15.62489 | 32.08666 | 18.08963 |
| 22905 | ARHGEF12  | 33064.49 | 0.062373 | 0.107745 | 0.578895 | 0.56266  | 0.65308  | 30535.18 | 36565.47 | 29954.02 | 32901.55 | 31787.18 | 36643.56 |
| 23675 | ZNF407    | 1388.394 | 0.062339 | 0.136416 | 0.456976 | 0.647688 | 0.727299 | 1237.041 | 1613.77  | 1226.574 | 1359.365 | 1386.144 | 1507.469 |
| 23442 | GTF2E2    | 2231.335 | 0.06227  | 0.126193 | 0.493452 | 0.621693 | 0.705047 | 2053.965 | 2565.172 | 1928.567 | 2236.591 | 2378.691 | 2225.025 |
| 22957 | CRBN      | 1319.835 | 0.062187 | 0.109103 | 0.569982 | 0.56869  | 0.658562 | 1297.213 | 1306.672 | 1271.797 | 1229.902 | 1439.621 | 1373.807 |
| 22693 | MRPS24    | 2648.948 | 0.062045 | 0.101821 | 0.609351 | 0.542292 | 0.635299 | 2517.991 | 2821.36  | 2436.451 | 2794.623 | 2594.741 | 2728.519 |
| 23650 | LOC103234 | 795.539  | 0.061994 | 0.13425  | 0.461778 | 0.644241 | 0.724192 | 717.7224 | 809.6221 | 812.6142 | 816.9585 | 720.8803 | 895.4367 |
| 23408 | MOB2      | 966.2606 | 0.061894 | 0.124343 | 0.497765 | 0.61865  | 0.702615 | 984.4288 | 893.9235 | 962.8922 | 995.5286 | 884.4527 | 1077.338 |
| 25786 | LOC119624 | 41.02623 | 0.061856 | 0.51087  | 0.121081 | 0.903627 | 0.931627 | 48.24569 | 16.96977 | 55.65851 | 49.10679 | 29.4755  | 46.22906 |
| 26059 | LOC103238 | 10.40042 | 0.061796 | 0.811312 | 0.076168 | 0.939286 | 0.958245 | 6.505036 | 15.32753 | 8.348776 | 15.62489 | 8.556443 | 8.039836 |
| 23293 | LOC103239 | 6068.554 | 0.06178  | 0.119985 | 0.5149   | 0.606623 | 0.692327 | 5387.796 | 6970.195 | 5460.796 | 5825.851 | 6199.143 | 6567.541 |
| 23865 | LOC119618 | 459.3868 | 0.061684 | 0.144201 | 0.427764 | 0.668823 | 0.745051 | 471.0731 | 435.7398 | 444.5723 | 428.5684 | 474.8826 | 501.4848 |
| 22524 | OSBPL9    | 10376.29 | 0.061444 | 0.09649  | 0.636791 | 0.524261 | 0.618783 | 9870.309 | 11207.16 | 9385.416 | 10799.03 | 10682.72 | 10313.1  |
| 23361 | VAC14     | 2139.707 | 0.061396 | 0.121645 | 0.504713 | 0.613761 | 0.69843  | 2046.918 | 2196.216 | 2046.146 | 2203.109 | 1869.583 | 2476.269 |
| 26453 | LOC119624 | 0.747599 | 0.061329 | 3.096194 | 0.019808 | 0.984197 | 0.989108 | 1.084173 | 0        | 1.391463 | 0        | 0        | 2.009959 |
| 22806 | BSG       | 5364.534 | 0.061294 | 0.103591 | 0.591691 | 0.554057 | 0.645837 | 5427.911 | 4772.336 | 5558.198 | 5332.551 | 5163.813 | 5932.394 |
| 23219 | TINF2     | 1105.863 | 0.061291 | 0.116362 | 0.526723 | 0.598386 | 0.685133 | 1078.21  | 1111.246 | 1063.078 | 1104.903 | 1039.608 | 1238.135 |
| 25793 | NKX1-2    | 29.12808 | 0.061108 | 0.506391 | 0.120674 | 0.903949 | 0.931722 | 23.8518  | 28.46541 | 32.00364 | 42.41041 | 29.94755 | 18.08963 |
| 24824 | LOC119623 | 162.2332 | 0.060998 | 0.219922 | 0.27736  | 0.781503 | 0.836998 | 162.0838 | 137.9478 | 177.4115 | 156.2489 | 166.8506 | 172.8565 |
| 23406 | PGRMC2    | 3027.357 | 0.060938 | 0.122381 | 0.49794  | 0.618527 | 0.702535 | 2754.883 | 3459.095 | 2679.262 | 2984.354 | 2986.198 | 3300.353 |
| 24006 | ZNF276    | 879.4166 | 0.0608   | 0.149923 | 0.405542 | 0.685079 | 0.758678 | 951.3616 | 718.7517 | 916.9739 | 868.2974 | 817.1403 | 1003.974 |
| 23697 | RNF25     | 732.7703 | 0.06079  | 0.133948 | 0.453834 | 0.649948 | 0.729159 | 736.6954 | 701.2345 | 720.082  | 694.1915 | 695.211  | 849.2077 |
| 24195 | ZNF416    | 296.9056 | 0.060731 | 0.162153 | 0.374528 | 0.708012 | 0.77795  | 294.895  | 297.792  | 279.684  | 294.6408 | 305.8928 | 308.5287 |
| 23151 | PPARA     | 1239.16  | 0.060639 | 0.113012 | 0.536572 | 0.591564 | 0.67931  | 1290.166 | 1213.065 | 1138.217 | 1290.169 | 1180.789 | 1322.553 |
| 22200 | TRAPPC3   | 3341.447 | 0.060588 | 0.087556 | 0.691987 | 0.488946 | 0.585523 | 3241.134 | 3360.561 | 3208.713 | 3497.743 | 3431.134 | 3309.397 |
| 22555 | SDHB      | 3438.897 | 0.060587 | 0.095941 | 0.631505 | 0.527711 | 0.621999 | 3622.221 | 3136.122 | 3340.902 | 3493.279 | 3561.619 | 3479.239 |
| 23139 | LOC103248 | 4683.743 | 0.06058  | 0.112531 | 0.538337 | 0.590345 | 0.678262 | 4928.649 | 4211.786 | 4623.135 | 4685.235 | 4308.169 | 5345.486 |
| 23186 | EHMT2     | 4001.777 | 0.060557 | 0        |          |          |          |          |          |          |          |          |          |



|       |           |          |          |          |          |          |          |          |          |          |          |          |          |
|-------|-----------|----------|----------|----------|----------|----------|----------|----------|----------|----------|----------|----------|----------|
| 23122 | PRKAB1    | 1390.483 | 0.060156 | 0.111362 | 0.54019  | 0.589066 | 0.677277 | 1411.593 | 1299.556 | 1378.94  | 1383.919 | 1326.249 | 1542.643 |
| 22390 | P4HB      | 38538.07 | 0.060069 | 0.091066 | 0.659618 | 0.509499 | 0.604959 | 38197.03 | 38719.53 | 36299.09 | 38312.23 | 36863.29 | 42837.25 |
| 25697 | LOC119621 | 35.10086 | 0.060022 | 0.444424 | 0.135056 | 0.892568 | 0.923412 | 41.74065 | 27.37059 | 34.09084 | 42.41041 | 27.80844 | 37.18424 |
| 23730 | HOXD8     | 877.5184 | 0.059839 | 0.133314 | 0.448862 | 0.653531 | 0.732159 | 793.0724 | 985.3413 | 798.0039 | 906.2436 | 909.122  | 873.3272 |
| 22341 | HSDL2     | 5384.355 | 0.05978  | 0.089456 | 0.668262 | 0.503966 | 0.599702 | 5135.184 | 5646.553 | 5037.095 | 5450.854 | 5488.958 | 5547.487 |
| 25135 | LOC119621 | 299.182  | 0.059585 | 0.264418 | 0.225346 | 0.82171  | 0.869114 | 235.8076 | 434.0976 | 207.3279 | 316.962  | 331.5622 | 269.3345 |
| 23143 | SLC3B6    | 2813.892 | 0.059466 | 0.110545 | 0.537938 | 0.59062  | 0.678461 | 2787.95  | 2462.258 | 3015.3   | 2834.801 | 3052.511 | 2730.529 |
| 24022 | PPP1R12A  | 10381.53 | 0.05938  | 0.1473   | 0.403121 | 0.686859 | 0.76011  | 8853.897 | 13084.78 | 8565.149 | 10361.53 | 10597.15 | 10826.64 |
| 23249 | TDRD7     | 1383.309 | 0.059367 | 0.113652 | 0.52236  | 0.60142  | 0.687697 | 1372.563 | 1437.503 | 1257.187 | 1437.49  | 1302.718 | 1492.395 |
| 23210 | FAM13B    | 984.3712 | 0.059334 | 0.112371 | 0.528021 | 0.597485 | 0.684366 | 1008.823 | 957.9707 | 923.2355 | 1042.403 | 998.9647 | 974.8301 |
| 25551 | LOC119621 | 48.96301 | 0.059281 | 0.376509 | 0.157449 | 0.874891 | 0.910331 | 45.53526 | 41.6033  | 57.7457  | 42.41041 | 49.19955 | 57.28383 |
| 22590 | NCKAP1    | 16499.8  | 0.059274 | 0.094705 | 0.625883 | 0.531391 | 0.625367 | 16381.85 | 16780.91 | 15327.66 | 16180.69 | 15906.43 | 18421.27 |
| 25701 | KIF5A     | 60.70668 | 0.059126 | 0.43918  | 0.134628 | 0.892906 | 0.923618 | 53.12446 | 62.95236 | 59.8329  | 93.74933 | 68.45154 | 26.12947 |
| 24123 | UBIAD1    | 428.0047 | 0.059104 | 0.152721 | 0.387006 | 0.698752 | 0.770067 | 382.1709 | 466.3949 | 409.09   | 448.6575 | 423.5439 | 438.171  |
| 23369 | DBNDD2    | 949.9461 | 0.059092 | 0.117308 | 0.503737 | 0.614446 | 0.699006 | 963.8296 | 947.5699 | 883.5788 | 950.8861 | 917.6785 | 1036.134 |
| 25625 | LOC119621 | 44.94908 | 0.059066 | 0.40343  | 0.146411 | 0.883597 | 0.9167   | 45.53526 | 35.58177 | 50.09266 | 42.41041 | 59.8951  | 36.17926 |
| 23974 | ANKRD49   | 649.2422 | 0.058922 | 0.143411 | 0.410861 | 0.681174 | 0.755355 | 600.6317 | 693.5708 | 611.5479 | 609.3707 | 757.2452 | 623.0873 |
| 25987 | SLC16A7   | 17.11408 | 0.058917 | 0.655928 | 0.089823 | 0.928428 | 0.949793 | 13.01007 | 12.04306 | 25.74206 | 20.08914 | 10.69555 | 21.10457 |
| 24507 | LOC103215 | 696.3979 | 0.058804 | 0.178275 | 0.329851 | 0.741513 | 0.804289 | 618.5205 | 875.3115 | 551.0192 | 705.3521 | 750.8278 | 677.3562 |
| 25832 | LAMA1     | 29.73965 | 0.058785 | 0.513109 | 0.114565 | 0.90879  | 0.935281 | 22.76763 | 27.37059 | 36.17803 | 31.24978 | 42.78221 | 18.08963 |
| 25847 | PTTG2     | 25.5772  | 0.058648 | 0.523787 | 0.111969 | 0.910848 | 0.936855 | 27.10432 | 21.89647 | 25.04633 | 31.24978 | 32.08666 | 16.07967 |
| 22577 | GALNT2    | 9886.712 | 0.058647 | 0.093279 | 0.628723 | 0.52953  | 0.623535 | 9780.322 | 9989.718 | 9294.275 | 9950.822 | 9380     | 10925.13 |
| 24242 | PLIN3     | 2107.706 | 0.058605 | 0.158694 | 0.369294 | 0.711909 | 0.780776 | 2435.164 | 1556.839 | 2206.164 | 2129.449 | 1953.008 | 2365.052 |
| 24233 | CUNH12or  | 1846.733 | 0.058496 | 0.158255 | 0.369632 | 0.711657 | 0.780729 | 1964.521 | 1340.064 | 2124.764 | 1912.933 | 1807.549 | 1930.566 |
| 23569 | SEC31A    | 9491.206 | 0.058435 | 0.1233   | 0.473931 | 0.635549 | 0.716877 | 8529.729 | 11111.91 | 8257.636 | 9439.665 | 9373.583 | 10234.71 |
| 24058 | DLG3      | 587.8235 | 0.058364 | 0.147228 | 0.39642  | 0.691795 | 0.76446  | 517.6925 | 654.7045 | 557.2808 | 602.6743 | 560.447  | 634.142  |
| 23411 | RELL1     | 1244.466 | 0.058361 | 0.117391 | 0.49715  | 0.619083 | 0.703017 | 1169.822 | 1352.107 | 1137.521 | 1223.206 | 1270.632 | 1313.508 |
| 24041 | WDR61     | 3109.06  | 0.058361 | 0.145645 | 0.400705 | 0.688637 | 0.761508 | 3419.481 | 2313.91  | 3404.909 | 3285.691 | 3120.962 | 3109.406 |
| 24172 | CACD      | 705.2953 | 0.058357 | 0.153781 | 0.379481 | 0.704331 | 0.774641 | 621.231  | 832.6134 | 619.8967 | 700.8879 | 714.463  | 742.6798 |
| 24322 | SNTA1     | 439.0814 | 0.058352 | 0.162816 | 0.358395 | 0.720048 | 0.787044 | 468.3626 | 359.1022 | 464.0528 | 437.4969 | 449.2132 | 456.2607 |
| 23485 | ZNF302    | 948.6321 | 0.058301 | 0.119725 | 0.486952 | 0.626292 | 0.708962 | 931.8465 | 968.3715 | 887.7532 | 890.6187 | 1052.442 | 960.7604 |
| 25675 | LOC103231 | 59.89493 | 0.058126 | 0.417932 | 0.139081 | 0.889386 | 0.920897 | 72.63957 | 43.79295 | 57.7457  | 58.0353  | 91.98176 | 35.17428 |
| 25871 | LOC103234 | 22.16128 | 0.058124 | 0.540278 | 0.107582 | 0.914327 | 0.939561 | 26.56223 | 16.96977 | 21.56767 | 20.08914 | 25.66933 | 22.10955 |
| 25092 | CHST7     | 163.6843 | 0.058065 | 0.250362 | 0.231925 | 0.816596 | 0.865184 | 174.5518 | 125.3573 | 182.9774 | 180.8023 | 130.4858 | 187.9312 |
| 23026 | PCBP1     | 2080.062 | 0.058053 | 0.104032 | 0.558031 | 0.576823 | 0.665979 | 2097.332 | 2048.962 | 1973.79  | 2116.056 | 1950.869 | 2293.363 |
| 23837 | LOC103244 | 6270.901 | 0.057842 | 0.133953 | 0.43181  | 0.665879 | 0.742638 | 5464.773 | 7566.874 | 5405.137 | 6377.187 | 6141.387 | 6670.049 |
| 25590 | LOC103241 | 45.39541 | 0.05757  | 0.376185 | 0.153036 | 0.87837  | 0.912508 | 43.909   | 49.26706 | 40.35242 | 42.41041 | 49.19955 | 47.23404 |
| 23464 | CXXC1     | 1319.61  | 0.057437 | 0.117124 | 0.490397 | 0.623853 | 0.706833 | 1197.469 | 1402.469 | 1283.624 | 1354.901 | 1247.102 | 1432.096 |
| 23885 | SETD2     | 4385.977 | 0.057311 | 0.134803 | 0.425143 | 0.670732 | 0.746553 | 3797.315 | 5222.856 | 3879.398 | 4426.308 | 4152.014 | 4837.971 |
| 23823 | DOCK11    | 1284.59  | 0.057308 | 0.132023 | 0.434078 | 0.664232 | 0.741242 | 1194.216 | 1472.538 | 1109.692 | 1339.276 | 1281.327 | 1310.493 |
| 24723 | LOC119621 | 778.1414 | 0.05724  | 0.193908 | 0.295193 | 0.767847 | 0.825677 | 937.2673 | 555.0756 | 793.8295 | 727.6734 | 945.4869 | 709.5155 |
| 25646 | LOC103221 | 41.62807 | 0.057038 | 0.399031 | 0.142942 | 0.886336 | 0.918783 | 46.07734 | 43.24553 | 33.39511 | 40.17829 | 40.6431  | 46.22906 |
| 23476 | RMDN1     | 949.4927 | 0.057038 | 0.1169   | 0.487922 | 0.625605 | 0.708456 | 986.5972 | 866.5529 | 937.1502 | 999.9929 | 969.0171 | 937.6458 |
| 24667 | ZMAT5     | 420.6694 | 0.056998 | 0.186766 | 0.305187 | 0.760224 | 0.819269 | 462.3997 | 312.5721 | 461.2699 | 448.6575 | 432.1004 | 407.0167 |
| 23535 | ATP13A1   | 2459.007 | 0.056894 | 0.119006 | 0.478081 | 0.632592 | 0.714566 | 2522.328 | 2183.078 | 2529.679 | 2671.856 | 2181.893 | 2665.206 |
| 23166 | UBQLN1    | 8570.877 | 0.056795 | 0.106193 | 0.534829 | 0.592768 | 0.680224 | 7975.717 | 9470.224 | 7764.362 | 8582.528 | 8340.392 | 9292.04  |
| 25852 | TRNAY-GU  | 30.33282 | 0.056737 | 0.510637 | 0.111111 | 0.911528 | 0.93738  | 38.48813 | 21.34906 | 29.91645 | 37.94616 | 17.11289 | 37.18424 |
| 24018 | AAR2      | 1294.833 | 0.056539 | 0.13997  | 0.403936 | 0.68626  | 0.75964  | 1421.893 | 1068     | 1323.281 | 1223.206 | 1266.354 | 1466.265 |
| 25734 | LOC103231 | 35.3546  | 0.056428 | 0.436736 | 0.129204 | 0.897196 | 0.926865 | 29.27266 | 38.31883 | 35.4823  | 42.41041 | 38.50399 | 28.13943 |
| 24960 | LOC103231 | 147.2212 | 0.056359 | 0.222524 | 0.253271 | 0.800059 | 0.852146 | 137.1479 | 142.3271 | 155.1481 | 136.1597 | 149.7377 | 162.8067 |
| 24528 | IK        | 5080.361 | 0.056339 | 0.172636 | 0.326343 | 0.744165 | 0.806573 | 4054.806 | 6825.13  | 4063.071 | 5216.481 | 5118.892 | 5203.784 |
| 23994 | PLEKHG2   | 2356.941 | 0.056267 | 0.138174 | 0.407215 | 0.68385  | 0.757696 | 2005.72  | 2780.305 | 2150.506 | 2325.876 | 2248.205 | 2631.036 |
| 23089 | SCYL1     | 3636.845 | 0.056258 | 0.102749 | 0.547526 | 0.584018 | 0.672446 | 3811.951 | 3337.022 | 3555.187 | 3582.564 | 3512.42  | 4021.928 |
| 24161 | SLC25A17  | 2026.653 | 0.056114 | 0.147278 | 0.38101  | 0.703196 | 0.773713 | 2238.817 | 1549.723 | 2176.943 | 1941.95  | 2004.347 | 2248.139 |
| 23494 | CREM      | 1129.245 | 0.056065 | 0.115463 | 0.485566 | 0.627275 | 0.709803 | 1122.661 | 1042.82  | 1153.523 | 1124.992 | 1247.102 | 1084.373 |
| 24360 | SPIN3     | 393.0509 | 0.05587  | 0.158296 | 0.352947 | 0.724128 | 0.790283 | 357.2349 | 433.5502 | 365.259  | 386.158  | 417.1266 | 398.9768 |
| 23980 | NHEJ1     | 680.2468 | 0.055777 | 0.136121 | 0.409757 | 0.681984 | 0.756028 | 686.8234 | 706.7087 | 611.5479 | 645.0847 | 669.5416 | 761.7744 |
| 23774 | WARS2     | 715.5126 | 0.055568 | 0.126163 | 0.440448 | 0.659612 | 0.737573 | 707.9648 | 722.5836 | 676.2509 | 763.3874 | 663.1243 | 759.7645 |
| 24005 | HTRA2     | 670.2413 | 0.055469 | 0.136641 | 0.405942 | 0.684785 | 0.758384 | 715.554  | 583.541  | 674.1637 | 696.4236 | 650.2896 | 701.4757 |
| 23333 | ATG2B     | 4206.902 | 0.055373 | 0.108828 | 0.508816 | 0.610881 | 0.695992 | 3992.466 | 4590.048 | 3800.78  | 4055.775 | 4173.405 | 4628.935 |
| 24396 | ZNF205    | 546.8441 | 0.055352 | 0.159375 | 0.347305 | 0.728362 | 0.793717 | 585.9954 | 450.5199 | 575.3698 | 562.496  | 502.691  | 603.9927 |
| 26290 | LOC119621 | 3.805659 | 0.055112 | 1.303828 | 0.04227  | 0.966284 | 0.977126 | 3.794605 | 2.189647 | 4.87012  | 6.696381 | 4.278221 | 1.004979 |
| 22796 | NDUFB8    | 4770.952 | 0.055069 | 0.092806 | 0.593378 | 0.552928 | 0.644833 | 4893.414 | 4380.389 | 4768.543 | 4964.25  | 4618.34  | 5000.778 |
| 23165 | AP1S1     | 10531.07 | 0.055001 | 0.10278  | 0.535132 | 0.592558 | 0.680042 | 11024.95 | 9024.631 | 10943.16 | 10803.49 | 10490.2  | 10900.01 |
| 23433 | COLGALT1  | 5525.852 | 0.054956 | 0.111099 | 0.494659 | 0.620841 | 0.704351 | 5640.951 | 5321.39  | 5308.43  | 5441.926 | 5005.519 | 6436.893 |
| 23095 | GFM1      | 5198.948 | 0.054814 | 0.100439 | 0.545745 | 0.585241 | 0.673651 | 4887.993 | 5616.993 | 4799.155 | 5075.857 | 5245.099 | 5568.591 |
| 24904 | TMEM161   | 645.4599 | 0.054769 | 0.207325 | 0.264171 | 0.791648 | 0.845084 | 734.527  | 448.8777 | 720.082  | 654.0132 | 528.3603 | 786.8989 |
| 26141 | LOC119621 | 8.374309 | 0.054759 | 0.844596 | 0.064834 | 0.948306 | 0.964376 | 7.047123 | 8.758589 | 9.044508 | 8.928508 | 6.417332 | 10.04979 |
| 25531 | LOC103246 | 68.5908  | 0.054746 | 0.341053 | 0.160519 | 0.872472 | 0.90849  | 84.56547 | 62.40495 | 53.57132 | 71.42806 | 81.28621 | 58.28881 |
| 26311 |           |          |          |          |          |          |          |          |          |          |          |          |          |



|       |           |          |          |          |          |          |          |          |          |          |          |          |          |
|-------|-----------|----------|----------|----------|----------|----------|----------|----------|----------|----------|----------|----------|----------|
| 24546 | FBXL14    | 370.0706 | 0.054568 | 0.168601 | 0.323653 | 0.746201 | 0.808165 | 397.3493 | 306.5506 | 384.7394 | 390.6222 | 374.3444 | 366.8175 |
| 25990 | SCFL      | 18.39487 | 0.054504 | 0.613457 | 0.088846 | 0.929204 | 0.950477 | 17.34676 | 12.59047 | 23.65487 | 22.32127 | 21.39111 | 13.06473 |
| 23048 | PATJ      | 3129.909 | 0.054469 | 0.098178 | 0.554795 | 0.579035 | 0.667895 | 3045.441 | 3315.126 | 2853.194 | 3127.21  | 3172.301 | 3266.183 |
| 24339 | ZNF875    | 385.3678 | 0.054404 | 0.15258  | 0.356559 | 0.721422 | 0.788014 | 359.4033 | 410.0114 | 365.9547 | 377.2295 | 393.5964 | 406.0117 |
| 24623 | LMNTD2    | 413.9811 | 0.054324 | 0.173982 | 0.312238 | 0.754859 | 0.815008 | 390.3022 | 366.2185 | 466.8357 | 383.9258 | 387.179  | 489.425  |
| 25865 | LOC103231 | 30.97051 | 0.054172 | 0.496273 | 0.109158 | 0.913077 | 0.938494 | 43.36691 | 22.9913  | 25.04633 | 35.71403 | 23.53022 | 35.17428 |
| 23927 | TRMO      | 754.8211 | 0.054008 | 0.128871 | 0.419083 | 0.675156 | 0.750157 | 716.6382 | 800.8635 | 705.4716 | 810.2621 | 703.7674 | 791.9238 |
| 24069 | LOC103215 | 2150.191 | 0.053961 | 0.13681  | 0.394421 | 0.69327  | 0.765708 | 1949.885 | 2506.051 | 1877.779 | 1973.2   | 2188.31  | 2405.921 |
| 23046 | GNA11     | 4134.023 | 0.053956 | 0.097211 | 0.555504 | 0.578867 | 0.66776  | 4038.001 | 3942.46  | 4195.956 | 4256.666 | 3854.677 | 4516.378 |
| 23178 | SCYL2     | 3801.278 | 0.053912 | 0.101162 | 0.532926 | 0.594085 | 0.681347 | 3494.289 | 4136.244 | 3560.057 | 3906.222 | 3822.591 | 3888.266 |
| 25985 | LOC119621 | 18.71512 | 0.053692 | 0.595688 | 0.090134 | 0.92818  | 0.949612 | 21.68345 | 21.34906 | 11.82743 | 20.08914 | 19.252   | 18.08963 |
| 23579 | TTCC38    | 1112.331 | 0.053265 | 0.112784 | 0.472272 | 0.636733 | 0.717907 | 1123.745 | 1116.173 | 1039.423 | 1095.974 | 1086.668 | 1212.005 |
| 23754 | NDUF83    | 3337.392 | 0.05309  | 0.119563 | 0.444033 | 0.657019 | 0.73526  | 3191.262 | 3042.515 | 3587.191 | 3645.063 | 3625.793 | 2932.53  |
| 23375 | CYLD      | 2310.293 | 0.053049 | 0.105595 | 0.50238  | 0.6154   | 0.699874 | 2193.281 | 2459.521 | 2153.984 | 2370.519 | 2201.145 | 2483.304 |
| 26161 | LOC103241 | 10.53172 | 0.052958 | 0.855277 | 0.061919 | 0.950627 | 0.966034 | 7.589209 | 11.49565 | 11.82743 | 20.08914 | 2.139111 | 10.04979 |
| 22432 | EIF1AX    | 13324.23 | 0.052878 | 0.08115  | 0.651603 | 0.514657 | 0.609912 | 12649.59 | 13547.89 | 13038.7  | 13783.38 | 13805.82 | 13120.01 |
| 26079 | LOC119621 | 14.13853 | 0.052846 | 0.710158 | 0.074414 | 0.940681 | 0.958932 | 11.9259  | 20.25424 | 9.044508 | 11.16063 | 21.39111 | 11.05477 |
| 23303 | ZBED6     | 3875.051 | 0.052692 | 0.10259  | 0.513616 | 0.607521 | 0.693084 | 3744.733 | 4028.404 | 3647.024 | 3741.045 | 3745.583 | 4343.521 |
| 23223 | ITM2C     | 4047.261 | 0.05269  | 0.100143 | 0.526144 | 0.598788 | 0.685475 | 4133.409 | 3848.852 | 3944.797 | 4082.56  | 3777.669 | 4496.278 |
| 24949 | PRMT6     | 226.4602 | 0.052671 | 0.206455 | 0.255119 | 0.798631 | 0.851    | 243.9389 | 180.6459 | 243.506  | 238.8376 | 209.6328 | 242.2001 |
| 23534 | ZSCAN21   | 1314.13  | 0.052582 | 0.109984 | 0.478088 | 0.632588 | 0.714566 | 1312.391 | 1364.15  | 1192.484 | 1390.615 | 1300.579 | 1324.563 |
| 23853 | FANCM     | 841.2736 | 0.052576 | 0.122348 | 0.429724 | 0.667397 | 0.743837 | 829.9342 | 886.8071 | 759.0429 | 863.8331 | 874.8963 | 833.128  |
| 24899 | ZNF230    | 209.6873 | 0.052515 | 0.197745 | 0.265572 | 0.790569 | 0.844101 | 222.7975 | 190.4993 | 206.6322 | 205.3557 | 194.6591 | 238.1801 |
| 23902 | ACTR1B    | 2477.168 | 0.05242  | 0.124128 | 0.422303 | 0.672804 | 0.748295 | 2627.493 | 2104.798 | 2570.032 | 2455.34  | 2314.518 | 2790.828 |
| 24441 | CHCHD1    | 1399.132 | 0.052174 | 0.153976 | 0.338847 | 0.734725 | 0.79916  | 1489.111 | 1051.031 | 1582.093 | 1363.83  | 1486.682 | 1422.046 |
| 26355 | LOC119621 | 2.39238  | 0.052135 | 1.560756 | 0.033404 | 0.973352 | 0.981772 | 2.710432 | 2.737059 | 1.391463 | 2.232127 | 4.278221 | 1.004979 |
| 26310 | SLC24A5   | 3.880339 | 0.052125 | 1.326158 | 0.039305 | 0.968647 | 0.978772 | 2.710432 | 3.284471 | 5.565851 | 6.696381 | 0        | 5.024897 |
| 24524 | AAK1      | 1322.967 | 0.052089 | 0.159266 | 0.327058 | 0.743624 | 0.806119 | 1137.839 | 1646.615 | 1113.866 | 1247.759 | 1379.726 | 1411.996 |
| 23064 | LPIN1     | 4495.455 | 0.05208  | 0.094407 | 0.551651 | 0.581188 | 0.669913 | 4541.6   | 4473.449 | 4234.221 | 4466.486 | 4329.56  | 4927.414 |
| 23701 | GLRX5     | 1329.404 | 0.051899 | 0.114467 | 0.453398 | 0.650262 | 0.729387 | 1392.62  | 1181.862 | 1344.849 | 1308.026 | 1339.083 | 1409.986 |
| 26253 | LOC119621 | 5.168867 | 0.051877 | 1.087608 | 0.047698 | 0.961957 | 0.974122 | 4.336691 | 4.379295 | 6.261582 | 4.464254 | 8.556443 | 3.014938 |
| 23645 | STK36     | 1144.846 | 0.051836 | 0.112194 | 0.462024 | 0.644064 | 0.724135 | 1159.523 | 1110.699 | 1107.604 | 1127.224 | 1103.781 | 1260.244 |
| 24521 | LOC119621 | 647.16   | 0.051818 | 0.158084 | 0.327785 | 0.743074 | 0.805628 | 563.2277 | 770.2084 | 573.2826 | 638.3883 | 669.5416 | 668.3113 |
| 26329 | LOC119621 | 3.127342 | 0.051765 | 1.393637 | 0.037144 | 0.97037  | 0.979805 | 1.084173 | 3.284471 | 4.87012  | 2.232127 | 4.278221 | 3.014938 |
| 23638 | YIPF2     | 1416.451 | 0.051679 | 0.111532 | 0.463359 | 0.643107 | 0.723296 | 1479.896 | 1273.827 | 1422.771 | 1408.472 | 1403.257 | 1510.484 |
| 23596 | PDLIM5    | 3196.838 | 0.051615 | 0.110093 | 0.468828 | 0.639192 | 0.720161 | 3161.448 | 3323.885 | 2940.857 | 3109.353 | 3005.45  | 3640.036 |
| 24335 | LOXL2     | 448.5333 | 0.051535 | 0.144462 | 0.356739 | 0.721287 | 0.78792  | 427.1641 | 457.6363 | 436.9193 | 491.0679 | 417.1266 | 461.2856 |
| 23515 | CRYZL1    | 1261.522 | 0.051468 | 0.106981 | 0.481094 | 0.630449 | 0.712758 | 1310.765 | 1187.336 | 1221.009 | 1263.384 | 1262.075 | 1324.563 |
| 24062 | CHD9      | 6028.717 | 0.051445 | 0.130247 | 0.394981 | 0.692857 | 0.765507 | 5381.291 | 7204.487 | 5179.024 | 5870.494 | 6173.473 | 6363.53  |
| 25061 | SLC44A3   | 165.4182 | 0.051347 | 0.217482 | 0.236097 | 0.813357 | 0.862819 | 173.4676 | 149.4434 | 165.5841 | 180.8023 | 143.3204 | 179.8913 |
| 23764 | GNAQ      | 5393.344 | 0.051218 | 0.115654 | 0.442859 | 0.657868 | 0.735932 | 4945.996 | 6112.4   | 4838.116 | 5299.069 | 5279.325 | 5885.16  |
| 23572 | XYLT2     | 1667.444 | 0.050989 | 0.107739 | 0.473262 | 0.636026 | 0.717324 | 1712.993 | 1560.671 | 1645.405 | 1683.024 | 1576.525 | 1826.048 |
| 24146 | LOC103221 | 849.3703 | 0.050837 | 0.132516 | 0.383626 | 0.701256 | 0.77209  | 809.877  | 916.3674 | 779.2191 | 767.8517 | 913.4003 | 909.5064 |
| 23827 | TOPBP1    | 8842.367 | 0.0508   | 0.117166 | 0.43357  | 0.664601 | 0.741505 | 7949.697 | 10250.29 | 7861.069 | 8866.008 | 8877.309 | 9249.831 |
| 23931 | ZC3H7A    | 1855.21  | 0.050591 | 0.120947 | 0.418293 | 0.675733 | 0.750673 | 1710.825 | 2073.596 | 1687.149 | 1776.773 | 1858.887 | 2024.029 |
| 24311 | MFAP1     | 3165.906 | 0.050553 | 0.140579 | 0.359609 | 0.71914  | 0.786384 | 2720.731 | 3867.464 | 2743.965 | 3191.942 | 3133.797 | 3337.537 |
| 24124 | QPCTL     | 768.3245 | 0.050547 | 0.130702 | 0.386731 | 0.698955 | 0.770259 | 834.813  | 685.3596 | 745.1283 | 796.8693 | 750.8278 | 796.9487 |
| 23348 | MGPR      | 9426.194 | 0.050496 | 0.099735 | 0.5063   | 0.612646 | 0.697584 | 8860.944 | 10369.62 | 8553.321 | 9491.004 | 9583.216 | 9699.057 |
| 24231 | AP5S1     | 725.3836 | 0.050438 | 0.136345 | 0.369929 | 0.711435 | 0.78055  | 780.0623 | 623.5021 | 736.0838 | 732.1376 | 718.7412 | 761.7744 |
| 22997 | AGO4      | 3258.158 | 0.05043  | 0.089398 | 0.564107 | 0.572681 | 0.662031 | 3273.66  | 3266.406 | 3065.392 | 3220.959 | 3332.734 | 3389.796 |
| 24512 | RSBN1L    | 675.0789 | 0.050412 | 0.152919 | 0.329661 | 0.741656 | 0.804346 | 589.2479 | 783.3463 | 619.2009 | 689.7272 | 635.3159 | 733.635  |
| 23196 | NIPSNAP1  | 2574.681 | 0.050377 | 0.095072 | 0.529887 | 0.59619  | 0.683295 | 2538.59  | 2566.814 | 2488.631 | 2616.053 | 2464.255 | 2773.743 |
| 23509 | AREL1     | 2754.9   | 0.050222 | 0.10416  | 0.482167 | 0.629688 | 0.712078 | 2752.172 | 2773.736 | 2602.035 | 2714.266 | 2596.88  | 3090.312 |
| 26023 | LOC119621 | 20.56492 | 0.049989 | 0.604947 | 0.082634 | 0.934143 | 0.954317 | 18.97302 | 26.27577 | 14.61036 | 33.4819  | 14.97377 | 15.07469 |
| 23273 | GLT8D1    | 2102.738 | 0.049895 | 0.096344 | 0.517884 | 0.604539 | 0.690572 | 2130.399 | 2027.066 | 2046.146 | 2082.574 | 2077.076 | 2253.164 |
| 25586 | LOC119621 | 60.53086 | 0.049835 | 0.324864 | 0.153402 | 0.878082 | 0.91234  | 62.33993 | 57.47824 | 58.44144 | 64.73168 | 59.8951  | 60.29877 |
| 23261 | TPI1      | 16790.14 | 0.049812 | 0.095639 | 0.52084  | 0.602478 | 0.688573 | 17530.53 | 15557.44 | 16419.96 | 16805.68 | 15940.65 | 18486.6  |
| 24838 | PARP11    | 321.4231 | 0.049527 | 0.180048 | 0.275076 | 0.783258 | 0.838349 | 306.2788 | 296.6972 | 342.9956 | 294.6408 | 391.4573 | 296.4689 |
| 23833 | MRPL32    | 2387.475 | 0.049437 | 0.114239 | 0.432754 | 0.665194 | 0.742004 | 2108.174 | 2609.512 | 2318.177 | 2455.34  | 2558.376 | 2275.274 |
| 24160 | GPR27     | 777.861  | 0.049374 | 0.129561 | 0.381083 | 0.703141 | 0.773713 | 725.3116 | 850.1305 | 716.6033 | 823.6549 | 778.6363 | 772.8292 |
| 24942 | LOC103221 | 237.1073 | 0.049299 | 0.192199 | 0.256497 | 0.797567 | 0.850071 | 218.4608 | 269.3266 | 211.5023 | 232.1412 | 245.9977 | 245.215  |
| 25459 | LOC103215 | 83.46118 | 0.049213 | 0.288586 | 0.170531 | 0.864593 | 0.902834 | 73.72375 | 87.03848 | 84.1835  | 93.74933 | 87.70354 | 74.36848 |
| 23775 | LARP4B    | 5547.658 | 0.049202 | 0.111706 | 0.440456 | 0.659607 | 0.737573 | 5074.471 | 6260.749 | 5026.659 | 5517.818 | 5471.845 | 5934.404 |
| 26343 | LOC119621 | 4.921604 | 0.049175 | 1.387914 | 0.035431 | 0.971736 | 0.980661 | 3.252518 | 10.40082 | 0.695731 | 11.16063 | 0        | 4.019918 |
| 24630 | RTF1      | 2874.309 | 0.049075 | 0.158027 | 0.310545 | 0.756147 | 0.816166 | 2461.072 | 3655.616 | 2361.312 | 2863.819 | 2759.453 | 3144.581 |
| 26005 | LOC103241 | 20.95211 | 0.048907 | 0.570457 | 0.085733 | 0.931679 | 0.952422 | 26.56223 | 15.32753 | 20.17621 | 24.5534  | 14.97377 | 24.11951 |
| 25830 | LOC119615 | 37.50209 | 0.048901 | 0.424875 | 0.115096 | 0.908369 | 0.934921 | 34.15144 | 44.34036 | 31.30791 | 42.41041 | 40.6431  | 32.15934 |
| 26002 | LOC103241 | 21.92546 | 0.04886  | 0.565007 | 0.086477 | 0.931087 | 0.952004 | 29.81475 | 15.87494 | 19.48048 | 17.85702 | 21.39111 | 27.13445 |
| 23899 | BTBD2     | 903.6887 | 0.04868  | 0.1151   | 0.422931 | 0.672345 | 0.74791  | 905.8263 | 855.6047 | 905.8422 | 941.9576 | 864.2007 | 948.7006 |
| 26221 | MKX       | 8.95726  | 0.0486   | 0.922703 | 0.052672 | 0.957993 | 0.971292 |          |          |          |          |          |          |



|       |           |          |          |          |          |          |          |          |          |          |          |          |          |
|-------|-----------|----------|----------|----------|----------|----------|----------|----------|----------|----------|----------|----------|----------|
| 23305 | NMT2      | 2912.663 | 0.04848  | 0.09446  | 0.513239 | 0.607784 | 0.693326 | 2807.465 | 2973.541 | 2815.625 | 2845.962 | 2887.799 | 3145.586 |
| 25425 | NOS3      | 93.37399 | 0.048443 | 0.273926 | 0.176847 | 0.859629 | 0.898849 | 82.93921 | 87.58589 | 105.0554 | 98.21359 | 91.98176 | 94.46807 |
| 24024 | GPR108    | 2518.653 | 0.048439 | 0.120157 | 0.403127 | 0.686854 | 0.76011  | 2675.738 | 2218.113 | 2541.507 | 2526.768 | 2301.683 | 2848.112 |
| 24399 | LDLRAD3   | 811.7944 | 0.048257 | 0.13915  | 0.346799 | 0.728742 | 0.794033 | 821.2608 | 792.1049 | 788.2636 | 732.1376 | 772.219  | 964.7803 |
| 24210 | TFG       | 6348.377 | 0.048217 | 0.12959  | 0.372076 | 0.709836 | 0.779471 | 5649.082 | 7553.188 | 5526.194 | 6542.364 | 6040.849 | 6778.587 |
| 25071 | LOC119618 | 1062.539 | 0.048027 | 0.204525 | 0.234825 | 0.814345 | 0.863522 | 1338.411 | 751.5964 | 1040.814 | 1058.028 | 1324.11  | 862.2724 |
| 24850 | LOC119620 | 319.4828 | 0.047936 | 0.175133 | 0.273712 | 0.784306 | 0.839098 | 351.8141 | 278.0852 | 313.0791 | 348.2118 | 293.0582 | 332.6482 |
| 24209 | DLAT      | 3096.229 | 0.047774 | 0.128186 | 0.372696 | 0.709375 | 0.778997 | 2822.644 | 3622.771 | 2689.002 | 3303.548 | 2962.668 | 3176.74  |
| 23777 | AKAP11    | 1860.093 | 0.047758 | 0.108503 | 0.440154 | 0.659826 | 0.737767 | 1813.821 | 1967.398 | 1707.325 | 1984.361 | 1754.071 | 1933.58  |
| 24674 | MTG2      | 507.5129 | 0.047699 | 0.157201 | 0.303429 | 0.761563 | 0.820546 | 545.3389 | 460.3733 | 492.5778 | 575.8888 | 434.2395 | 536.659  |
| 26227 | LOC103228 | 7.711935 | 0.047538 | 0.918463 | 0.051758 | 0.958721 | 0.971808 | 8.673382 | 4.379295 | 9.740239 | 11.16063 | 4.278221 | 8.039836 |
| 24439 | CEP128    | 1208.027 | 0.047479 | 0.139843 | 0.339516 | 0.734221 | 0.798722 | 1056.526 | 1418.891 | 1088.124 | 1287.937 | 1178.65  | 1218.035 |
| 25456 | VWCE      | 95.90405 | 0.047315 | 0.277135 | 0.170729 | 0.864437 | 0.902776 | 107.8752 | 94.15483 | 80.00911 | 95.98146 | 106.9555 | 90.44815 |
| 23725 | LOC119621 | 1449.59  | 0.047272 | 0.105103 | 0.449766 | 0.652879 | 0.731582 | 1369.31  | 1497.719 | 1413.03  | 1491.061 | 1396.839 | 1529.579 |
| 23590 | TSNAX     | 3399.873 | 0.047096 | 0.100211 | 0.469967 | 0.638378 | 0.719427 | 3523.019 | 3017.334 | 3492.571 | 3522.296 | 3414.021 | 3429.995 |
| 24419 | ZNF672    | 648.6394 | 0.047011 | 0.137078 | 0.342953 | 0.731634 | 0.796531 | 680.3184 | 610.9116 | 625.4625 | 691.9594 | 579.699  | 703.4856 |
| 24444 | CUNH21orf | 518.4692 | 0.046997 | 0.139002 | 0.338107 | 0.735282 | 0.799685 | 498.1774 | 551.7911 | 479.3589 | 511.1571 | 549.7514 | 520.5794 |
| 23527 | MANF      | 3070.481 | 0.046864 | 0.097808 | 0.479142 | 0.631837 | 0.713963 | 3213.488 | 2787.968 | 3062.609 | 3118.281 | 3039.676 | 3200.86  |
| 24531 | FUS       | 1203.093 | 0.046779 | 0.14365  | 0.325647 | 0.744692 | 0.807045 | 1027.254 | 1314.336 | 1215.443 | 1082.582 | 1167.954 | 1410.991 |
| 25849 | LOC119625 | 48.13384 | 0.046759 | 0.419185 | 0.111547 | 0.911183 | 0.937127 | 49.32986 | 50.9093  | 40.35242 | 40.17829 | 74.86887 | 33.16432 |
| 23921 | EXOC1     | 1677.75  | 0.046497 | 0.110787 | 0.419692 | 0.67471  | 0.749851 | 1568.256 | 1813.575 | 1570.961 | 1613.828 | 1773.323 | 1726.555 |
| 24553 | ZNF133    | 459.9869 | 0.046281 | 0.143355 | 0.322841 | 0.746816 | 0.808622 | 485.7094 | 445.0458 | 428.5705 | 459.8182 | 451.3524 | 489.425  |
| 24234 | PCCA      | 833.107  | 0.04625  | 0.125154 | 0.369542 | 0.711724 | 0.780737 | 857.0385 | 865.4581 | 735.3881 | 839.2797 | 866.3398 | 835.1379 |
| 23985 | PSMD14    | 5397.218 | 0.04623  | 0.112932 | 0.409356 | 0.682279 | 0.756238 | 5692.991 | 4541.328 | 5695.257 | 5624.96  | 5628     | 5200.769 |
| 25683 | LOC103216 | 72.22771 | 0.04619  | 0.334277 | 0.13818  | 0.890098 | 0.921359 | 80.22878 | 58.57306 | 73.05179 | 66.96381 | 96.25998 | 58.28881 |
| 25873 | CCDC81    | 36.92352 | 0.046187 | 0.429809 | 0.107459 | 0.914424 | 0.939589 | 27.10432 | 42.15071 | 39.65669 | 37.94616 | 38.50399 | 36.17926 |
| 24863 | MGMT      | 1063.137 | 0.046145 | 0.169806 | 0.271751 | 0.785814 | 0.840214 | 1175.785 | 770.2084 | 1195.266 | 1035.707 | 1031.051 | 1170.801 |
| 24156 | ARNT      | 2841.087 | 0.04605  | 0.120741 | 0.381396 | 0.702909 | 0.77359  | 2613.398 | 3263.669 | 2511.59  | 2821.409 | 2838.6   | 2997.854 |
| 24527 | ZNF383    | 519.3065 | 0.045922 | 0.140667 | 0.326458 | 0.744078 | 0.806512 | 542.6285 | 511.2826 | 475.8803 | 546.8711 | 549.7514 | 489.425  |
| 25596 | MBLAC1    | 115.8411 | 0.045894 | 0.301757 | 0.15209  | 0.879116 | 0.913084 | 120.3432 | 80.46954 | 140.5377 | 100.4457 | 149.7377 | 103.5129 |
| 25650 | LOC103231 | 81.46966 | 0.045736 | 0.322497 | 0.141818 | 0.887224 | 0.919565 | 65.05036 | 107.2927 | 68.18167 | 82.5887  | 81.28621 | 84.41828 |
| 24448 | LOC103235 | 786.066  | 0.045626 | 0.135045 | 0.337854 | 0.735473 | 0.799761 | 745.9108 | 856.6995 | 722.1692 | 734.3698 | 782.9145 | 874.3321 |
| 23673 | ZNF134    | 1724.067 | 0.045599 | 0.099569 | 0.457964 | 0.646978 | 0.726562 | 1677.757 | 1768.688 | 1645.405 | 1671.863 | 1796.853 | 1783.839 |
| 24760 | CREB5     | 535.6004 | 0.045477 | 0.157648 | 0.388473 | 0.772985 | 0.829927 | 469.4468 | 623.5021 | 487.7077 | 535.7105 | 562.5861 | 534.6491 |
| 24703 | LOC103227 | 1652.503 | 0.045436 | 0.152367 | 0.298198 | 0.765552 | 0.823842 | 1785.633 | 1255.763 | 1838.818 | 1805.791 | 1531.603 | 1697.41  |
| 25327 | LOC119627 | 162.898  | 0.045302 | 0.231627 | 0.19558  | 0.844939 | 0.886898 | 155.0367 | 192.1415 | 132.8847 | 167.4095 | 171.1289 | 158.7868 |
| 25006 | DTX2      | 554.3378 | 0.04528  | 0.185136 | 0.244579 | 0.806783 | 0.857727 | 607.6788 | 437.9295 | 595.5461 | 566.9603 | 455.6306 | 662.2815 |
| 25041 | PLEKHN1   | 232.5783 | 0.045276 | 0.189291 | 0.239188 | 0.81096  | 0.86099  | 203.8245 | 244.6931 | 237.2444 | 229.9091 | 256.6933 | 223.1054 |
| 25974 | LOC119626 | 26.87936 | 0.045153 | 0.491314 | 0.091903 | 0.926775 | 0.948539 | 20.59928 | 28.46541 | 30.61218 | 26.78552 | 25.66933 | 29.1444  |
| 24310 | CTDNBP1   | 1043.4   | 0.04514  | 0.125351 | 0.360107 | 0.718767 | 0.786032 | 974.6713 | 1155.039 | 953.152  | 1060.26  | 1011.799 | 1105.477 |
| 24048 | ZNF75A    | 1276.47  | 0.045117 | 0.113139 | 0.398775 | 0.690059 | 0.762858 | 1341.664 | 1286.418 | 1141.695 | 1263.384 | 1309.136 | 1316.523 |
| 24226 | DCAF6     | 6443.085 | 0.04498  | 0.121412 | 0.370476 | 0.711028 | 0.780264 | 5733.648 | 7553.736 | 5739.088 | 6464.24  | 6733.92  | 6433.879 |
| 24596 | CKS2      | 3244.6   | 0.044946 | 0.141883 | 0.316781 | 0.75141  | 0.812141 | 3421.107 | 2539.443 | 3617.803 | 3513.368 | 3450.386 | 2925.495 |
| 25470 | NOL3      | 95.43297 | 0.044919 | 0.26542  | 0.169238 | 0.865609 | 0.903439 | 87.81799 | 95.24966 | 98.09812 | 100.4457 | 100.5382 | 90.44815 |
| 24273 | RTL10     | 1010.486 | 0.044827 | 0.122499 | 0.365936 | 0.714412 | 0.78246  | 1039.722 | 929.5053 | 1020.638 | 975.4395 | 969.0171 | 1128.592 |
| 25977 | LOC119626 | 26.76877 | 0.044471 | 0.486706 | 0.091371 | 0.927198 | 0.948899 | 26.56223 | 23.53871 | 28.52499 | 26.78552 | 32.08666 | 23.11453 |
| 26209 | LOC103216 | 11.88376 | 0.044425 | 0.809928 | 0.054851 | 0.956257 | 0.969976 | 15.7205  | 4.379295 | 14.61036 | 17.85702 | 10.69555 | 8.039836 |
| 24722 | CENATAC   | 382.7939 | 0.044405 | 0.150285 | 0.295468 | 0.767636 | 0.825484 | 390.8443 | 372.7874 | 365.259  | 417.4077 | 378.6226 | 371.8424 |
| 25043 | SF3B4     | 1233.638 | 0.044223 | 0.185163 | 0.238832 | 0.811236 | 0.861187 | 929.136  | 1644.973 | 1069.339 | 1225.438 | 1304.858 | 1228.085 |
| 25785 | LOC103227 | 54.43335 | 0.043844 | 0.36174  | 0.121203 | 0.903531 | 0.931563 | 50.95612 | 60.2153  | 48.7012  | 71.42806 | 47.06043 | 48.23901 |
| 26137 | LOC119627 | 14.34152 | 0.043631 | 0.665874 | 0.065525 | 0.947756 | 0.964001 | 10.84173 | 16.96977 | 14.61036 | 17.85702 | 10.69555 | 15.07469 |
| 23991 | ACTR10    | 2179.76  | 0.043522 | 0.106707 | 0.407863 | 0.683374 | 0.757263 | 2264.295 | 1927.437 | 2251.387 | 2171.86  | 2188.31  | 2275.274 |
| 26127 | CRACR2A   | 18.65493 | 0.043494 | 0.649678 | 0.066947 | 0.946624 | 0.963291 | 21.14137 | 16.42235 | 16.69755 | 13.39276 | 34.22577 | 10.04979 |
| 24868 | FHL3      | 434.4373 | 0.043359 | 0.16033  | 0.270435 | 0.786826 | 0.841108 | 374.5817 | 485.5543 | 425.0919 | 415.1756 | 444.935  | 461.2856 |
| 23025 | UQCRL2    | 9019.046 | 0.043298 | 0.077553 | 0.558306 | 0.576635 | 0.665792 | 8978.034 | 8810.046 | 8862.226 | 9091.453 | 9279.462 | 9093.054 |
| 25153 | DYNLRB2   | 284.452  | 0.04328  | 0.195864 | 0.220972 | 0.825114 | 0.872089 | 327.9623 | 233.1974 | 281.0755 | 254.4625 | 299.4755 | 310.5387 |
| 24216 | ITGB1BP1  | 1580.039 | 0.04328  | 0.116556 | 0.371325 | 0.710396 | 0.779892 | 1662.037 | 1368.53  | 1638.447 | 1560.257 | 1662.089 | 1588.873 |
| 24292 | MDGA1     | 768.6945 | 0.043106 | 0.118678 | 0.36322  | 0.716441 | 0.784068 | 755.1263 | 741.743  | 776.4362 | 736.6019 | 804.3056 | 797.9537 |
| 24046 | MEAF6     | 2890.161 | 0.043059 | 0.107948 | 0.398882 | 0.68998  | 0.762834 | 2689.29  | 3199.622 | 2650.737 | 3011.139 | 2887.799 | 2902.381 |
| 24436 | CCDC9     | 751.6007 | 0.042628 | 0.125496 | 0.339675 | 0.734102 | 0.798661 | 757.2947 | 725.3207 | 740.9539 | 803.5657 | 684.5154 | 797.9537 |
| 24274 | AGBL3     | 2211.369 | 0.042573 | 0.116419 | 0.365683 | 0.714601 | 0.782635 | 2407.948 | 1929.079 | 2201.294 | 2314.716 | 2085.633 | 2329.542 |
| 24132 | ITCH      | 5971.949 | 0.042572 | 0.110585 | 0.384971 | 0.700259 | 0.771408 | 5628.483 | 6738.639 | 5285.471 | 5852.637 | 6098.605 | 6227.858 |
| 24673 | DDAH2     | 1362.27  | 0.042294 | 0.139062 | 0.30414  | 0.761021 | 0.819995 | 1460.923 | 1163.798 | 1405.377 | 1479.9   | 1172.233 | 1491.39  |
| 26148 | LOC119627 | 13.9172  | 0.042203 | 0.659587 | 0.063984 | 0.948983 | 0.964806 | 14.63633 | 13.6853  | 12.52316 | 15.62489 | 14.97377 | 12.05975 |
| 26081 | LOC119626 | 24.16776 | 0.042166 | 0.568529 | 0.074167 | 0.940878 | 0.95906  | 18.43094 | 31.74989 | 22.2634  | 24.5534  | 12.83466 | 35.17428 |
| 23582 | ANKRD13C  | 4708.005 | 0.042125 | 0.089356 | 0.471422 | 0.637339 | 0.718469 | 4696.094 | 4746.608 | 4479.119 | 4502.2   | 4849.364 | 4974.648 |
| 26393 | LOC119627 | 3.848212 | 0.042023 | 1.451007 | 0.028961 | 0.976895 | 0.983965 | 8.131296 | 2.189647 | 0.695731 | 8.928508 | 2.139111 | 1.004979 |
| 24105 | PDE12     | 2801.989 | 0.041907 | 0.107559 | 0.389618 | 0.696819 | 0.768494 | 2635.082 | 3062.769 | 2589.512 | 2712.034 | 2808.652 | 3003.884 |
| 25787 | PRSS16    | 69.77967 | 0.04178  | 0.345291 | 0.121    | 0.903691 | 0.931657 | 69.92914 | 68.42648 | 66.79021 | 53.57105 | 102.6773 | 57.28383 |
| 24860 | SLC3      |          |          |          |          |          |          |          |          |          |          |          |          |



|       |          |          |          |          |          |          |          |          |          |          |          |          |          |
|-------|----------|----------|----------|----------|----------|----------|----------|----------|----------|----------|----------|----------|----------|
| 25776 | SLC28A1  | 77.48335 | 0.041297 | 0.336209 | 0.122831 | 0.902241 | 0.930559 | 85.10756 | 58.57306 | 83.48776 | 93.74933 | 87.70354 | 56.27885 |
| 25771 | CHRN2    | 77.83941 | 0.041151 | 0.331526 | 0.124125 | 0.901216 | 0.929682 | 75.89209 | 72.25836 | 80.70484 | 62.49956 | 113.3729 | 62.30873 |
| 25649 | CENPBD1  | 88.4485  | 0.041138 | 0.289452 | 0.142122 | 0.886983 | 0.919352 | 95.4072  | 76.09024 | 89.74935 | 107.1421 | 74.86887 | 87.43321 |
| 24323 | TAX1BP3  | 3574.819 | 0.041118 | 0.114822 | 0.3581   | 0.720268 | 0.787252 | 3734.433 | 3043.61  | 3795.215 | 3792.384 | 3381.934 | 3701.339 |
| 23647 | GPAM     | 5238.969 | 0.040966 | 0.088694 | 0.461877 | 0.644417 | 0.724173 | 5270.706 | 5249.132 | 4979.349 | 5187.463 | 5125.309 | 5621.855 |
| 24207 | IDH3G    | 5349.066 | 0.040966 | 0.109728 | 0.373337 | 0.708897 | 0.778537 | 4995.326 | 5911.5   | 4917.429 | 5392.819 | 5031.188 | 5846.971 |
| 26212 | LOC10324 | 11.52061 | 0.040944 | 0.760973 | 0.053804 | 0.957091 | 0.970673 | 8.673382 | 10.94824 | 13.91463 | 17.85702 | 10.69555 | 7.034856 |
| 24482 | FZR1     | 1672.559 | 0.040836 | 0.122382 | 0.333677 | 0.738623 | 0.802219 | 1771.538 | 1459.947 | 1720.544 | 1654.006 | 1570.107 | 1859.212 |
| 24940 | BRD7     | 5298.055 | 0.040763 | 0.158853 | 0.256609 | 0.797481 | 0.850067 | 4376.805 | 6901.768 | 4390.065 | 5403.979 | 5403.394 | 5312.321 |
| 26477 | LOC10322 | 1.057546 | 0.040638 | 2.785268 | 0.01459  | 0.988359 | 0.992391 | 0        | 0.547412 | 2.782925 | 0        | 0        | 3.014938 |
| 23589 | PSMD7    | 3560.327 | 0.040611 | 0.086399 | 0.470042 | 0.638325 | 0.719398 | 3396.713 | 3594.306 | 3541.273 | 3544.618 | 3627.932 | 3657.12  |
| 24070 | CLK4     | 1814.136 | 0.040526 | 0.102747 | 0.394422 | 0.693269 | 0.765708 | 1753.649 | 1888.571 | 1727.501 | 1736.595 | 1843.913 | 1934.585 |
| 25251 | ZMAT1    | 612.1938 | 0.040493 | 0.195198 | 0.207444 | 0.835663 | 0.879811 | 490.0461 | 784.9885 | 535.7132 | 529.0141 | 712.3239 | 621.0773 |
| 24031 | CNOT8    | 2149.848 | 0.040478 | 0.100676 | 0.402065 | 0.687636 | 0.760718 | 2227.433 | 1979.441 | 2153.289 | 2247.752 | 2079.216 | 2211.96  |
| 24258 | ZNF200   | 1024.653 | 0.040433 | 0.109974 | 0.367658 | 0.713128 | 0.781537 | 1060.863 | 984.2464 | 985.8514 | 1053.564 | 1018.217 | 1045.179 |
| 25970 | SYT4     | 36.61978 | 0.040323 | 0.434069 | 0.092895 | 0.925987 | 0.947915 | 33.60935 | 33.93953 | 39.65669 | 46.87467 | 38.50399 | 27.13445 |
| 24647 | ZNF570   | 540.3027 | 0.040289 | 0.130899 | 0.307789 | 0.758243 | 0.817864 | 540.4601 | 542.4851 | 515.5369 | 529.0141 | 562.5861 | 551.7337 |
| 25212 | MICU3    | 214.171  | 0.040237 | 0.189496 | 0.212336 | 0.831845 | 0.877146 | 212.4979 | 211.301  | 211.5023 | 191.9629 | 224.6066 | 233.1552 |
| 24861 | ORC3     | 1213.387 | 0.039941 | 0.146893 | 0.271907 | 0.785694 | 0.840178 | 1077.668 | 1463.232 | 1049.163 | 1174.099 | 1259.936 | 1256.224 |
| 24467 | WDR48    | 3226.368 | 0.039935 | 0.118955 | 0.335715 | 0.737086 | 0.800863 | 2963.044 | 3702.146 | 2881.024 | 3308.012 | 3125.241 | 3378.741 |
| 24874 | RAB8A    | 3255.849 | 0.039866 | 0.14755  | 0.270184 | 0.787018 | 0.841155 | 2767.893 | 4075.481 | 2789.883 | 3261.138 | 3225.779 | 3414.92  |
| 26004 | LOC10324 | 41.4251  | 0.039674 | 0.459843 | 0.086277 | 0.931246 | 0.952053 | 52.04029 | 48.17224 | 22.95914 | 33.4819  | 40.6431  | 51.25395 |
| 24770 | ZNF319   | 708.2725 | 0.039633 | 0.13823  | 0.286717 | 0.774329 | 0.831034 | 735.0691 | 670.5795 | 695.0356 | 712.0485 | 628.8985 | 808.0035 |
| 26266 | LOC11962 | 8.739687 | 0.03961  | 0.874082 | 0.045316 | 0.963855 | 0.975561 | 9.757555 | 6.568942 | 9.044508 | 15.62489 | 6.417332 | 5.024897 |
| 25244 | TPCN2    | 595.1198 | 0.039559 | 0.189837 | 0.208383 | 0.83493  | 0.879283 | 683.0288 | 448.3303 | 633.1155 | 609.3707 | 498.4128 | 698.4607 |
| 25140 | MED26    | 328.9424 | 0.039307 | 0.175265 | 0.224271 | 0.822547 | 0.869825 | 352.3561 | 317.4989 | 307.5133 | 301.3371 | 308.0319 | 386.9171 |
| 24342 | DPCD     | 1699.866 | 0.039248 | 0.110411 | 0.355469 | 0.722238 | 0.788758 | 1763.949 | 1517.973 | 1751.156 | 1738.827 | 1636.42  | 1790.873 |
| 25404 | SPAG4    | 169.5865 | 0.039247 | 0.217594 | 0.18037  | 0.856862 | 0.896695 | 180.5148 | 152.1805 | 171.1499 | 147.3204 | 175.4071 | 190.9461 |
| 24373 | FCHSD1   | 1375.409 | 0.039229 | 0.111873 | 0.350658 | 0.725845 | 0.79172  | 1340.038 | 1434.219 | 1301.018 | 1319.187 | 1345.501 | 1512.494 |
| 24313 | PRKAA1   | 4829.044 | 0.039164 | 0.108927 | 0.359542 | 0.71919  | 0.786397 | 4485.223 | 5425.946 | 4377.542 | 4805.769 | 5073.971 | 4805.812 |
| 24948 | SLC10A7  | 438.2272 | 0.039003 | 0.152857 | 0.255158 | 0.798601 | 0.851    | 413.0698 | 470.7742 | 413.2644 | 482.1394 | 397.8746 | 452.2408 |
| 25994 | LOC10323 | 36.02456 | 0.038952 | 0.445299 | 0.087474 | 0.930295 | 0.951446 | 26.56223 | 40.50847 | 38.96096 | 46.87467 | 32.08666 | 31.15436 |
| 26114 | LOC11961 | 24.8313  | 0.038903 | 0.564277 | 0.068943 | 0.945035 | 0.96208  | 31.44101 | 14.78012 | 26.43779 | 35.71403 | 23.53022 | 17.08465 |
| 23904 | DEC1     | 2476.452 | 0.038865 | 0.092045 | 0.422245 | 0.672846 | 0.748311 | 2374.88  | 2461.164 | 2490.023 | 2598.196 | 2513.455 | 2420.996 |
| 26318 | LOC11962 | 6.326467 | 0.038831 | 1.011014 | 0.038408 | 0.969362 | 0.979197 | 7.589209 | 5.474118 | 5.565851 | 11.16063 | 2.139111 | 6.029877 |
| 25176 | SHC2     | 900.1792 | 0.038772 | 0.17821  | 0.217563 | 0.827769 | 0.874096 | 984.4288 | 660.1786 | 1022.725 | 941.9576 | 780.7754 | 1011.009 |
| 25935 | LOC10323 | 50.02849 | 0.038694 | 0.389782 | 0.099271 | 0.920923 | 0.944009 | 61.25576 | 35.58177 | 51.48412 | 55.80317 | 42.78221 | 53.26391 |
| 24344 | WDR26    | 4818.172 | 0.038464 | 0.108305 | 0.355145 | 0.722481 | 0.788989 | 4564.909 | 5346.571 | 4353.191 | 4881.662 | 4616.201 | 5146.5   |
| 24139 | RPS6KC1  | 2822.569 | 0.038426 | 0.1      | 0.384262 | 0.700785 | 0.771798 | 2774.94  | 2980.11  | 2602.731 | 2861.587 | 2725.227 | 2990.819 |
| 25850 | MICOS13  | 1722.092 | 0.038349 | 0.3441   | 0.111448 | 0.911261 | 0.937171 | 1928.201 | 982.0568 | 2188.075 | 1860.702 | 1711.289 | 1862.227 |
| 24586 | UVRAG    | 1081.706 | 0.0382   | 0.119882 | 0.318642 | 0.749998 | 0.810977 | 1069.536 | 1133.142 | 1002.549 | 1120.528 | 994.6865 | 1169.796 |
| 24827 | SIX1     | 613.6181 | 0.038101 | 0.137579 | 0.276939 | 0.781827 | 0.837188 | 604.4263 | 665.6528 | 544.7577 | 638.3883 | 622.4812 | 606.0026 |
| 24922 | L3MBTL1  | 956.7821 | 0.038052 | 0.146013 | 0.260606 | 0.794397 | 0.847405 | 1052.19  | 850.678  | 935.7587 | 845.9761 | 930.5131 | 1125.577 |
| 25375 | LOC10323 | 2115.793 | 0.037946 | 0.204161 | 0.185865 | 0.85255  | 0.893207 | 2412.826 | 1265.616 | 2587.425 | 2071.414 | 2062.103 | 2295.373 |
| 25971 | LOC11962 | 39.4663  | 0.037942 | 0.408657 | 0.092847 | 0.926025 | 0.947918 | 44.99317 | 35.58177 | 36.87376 | 33.4819  | 40.6431  | 45.22408 |
| 24027 | NANS     | 2086.367 | 0.037789 | 0.093864 | 0.402587 | 0.687252 | 0.760419 | 2042.581 | 2109.725 | 2028.057 | 2062.485 | 2083.494 | 2191.86  |
| 25356 | LOC10323 | 198.639  | 0.037716 | 0.199367 | 0.189181 | 0.849951 | 0.89118  | 189.7302 | 192.1415 | 203.8493 | 212.0521 | 218.1893 | 175.8714 |
| 24477 | PACS2    | 2147.577 | 0.037714 | 0.113055 | 0.333593 | 0.738687 | 0.802219 | 2120.642 | 2032.54  | 2213.121 | 2120.521 | 1961.564 | 2437.075 |
| 24083 | AGFG1    | 4073.825 | 0.037705 | 0.096024 | 0.392663 | 0.694568 | 0.766678 | 3994.634 | 4264.338 | 3807.042 | 4111.578 | 3901.738 | 4363.621 |
| 24932 | CTMEM250 | 1235.667 | 0.037693 | 0.146204 | 0.25781  | 0.796554 | 0.849366 | 1320.522 | 1000.669 | 1342.066 | 1220.973 | 1135.868 | 1393.907 |
| 24886 | TRCTC1   | 550.3249 | 0.037599 | 0.140104 | 0.268366 | 0.788417 | 0.842244 | 516.6083 | 580.8039 | 532.2345 | 602.6743 | 504.8301 | 564.7985 |
| 24280 | DUSP18   | 2297.725 | 0.037577 | 0.102968 | 0.364944 | 0.715153 | 0.783045 | 2354.281 | 2221.945 | 2233.993 | 2180.788 | 2256.762 | 2538.578 |
| 25018 | PINX1    | 410.2105 | 0.037534 | 0.154727 | 0.242583 | 0.808328 | 0.858958 | 385.9655 | 445.5932 | 385.4352 | 390.6222 | 406.431  | 447.2159 |
| 26181 | SIM1     | 15.01654 | 0.03745  | 0.632374 | 0.059221 | 0.952776 | 0.967478 | 14.63633 | 15.87494 | 13.91463 | 15.62489 | 14.97377 | 15.07469 |
| 26369 | LOC11962 | 5.854554 | 0.037397 | 1.181451 | 0.031654 | 0.974748 | 0.982733 | 4.336691 | 4.926706 | 7.653045 | 2.32127  | 14.97377 | 1.004979 |
| 24483 | NOL6     | 3762.809 | 0.03733  | 0.111964 | 0.333409 | 0.738825 | 0.802257 | 4014.15  | 3410.376 | 3724.946 | 3691.938 | 3497.446 | 4237.998 |
| 24426 | GTDC1    | 1757.236 | 0.037225 | 0.109152 | 0.341039 | 0.733074 | 0.79787  | 1647.4   | 1917.036 | 1638.447 | 1816.951 | 1749.793 | 1773.789 |
| 26082 | TRNAC-GC | 28.19219 | 0.037141 | 0.501375 | 0.074078 | 0.940949 | 0.959095 | 31.9831  | 22.44388 | 29.22072 | 17.85702 | 38.50399 | 29.1444  |
| 24240 | NRIP1    | 5181.452 | 0.037119 | 0.100522 | 0.369256 | 0.711937 | 0.780776 | 4927.023 | 5609.329 | 4810.287 | 4921.84  | 5403.394 | 5416.839 |
| 25401 | RPP25L   | 785.1264 | 0.037098 | 0.204655 | 0.181271 | 0.856155 | 0.896062 | 914.4997 | 501.9766 | 909.3209 | 834.8155 | 740.1323 | 810.0135 |
| 26097 | NOA1     | 24.45408 | 0.036884 | 0.516452 | 0.071417 | 0.943066 | 0.9607   | 24.93597 | 29.01283 | 18.78475 | 22.32127 | 23.53022 | 28.13943 |
| 23740 | CASD1    | 4879.617 | 0.036852 | 0.082533 | 0.44651  | 0.655229 | 0.733752 | 4898.292 | 4792.043 | 4764.368 | 4859.34  | 4898.563 | 5065.097 |
| 25790 | LOC10323 | 75.08549 | 0.036818 | 0.304775 | 0.120802 | 0.903848 | 0.93171  | 72.63957 | 85.94365 | 64.00729 | 73.66019 | 74.86887 | 79.39338 |
| 26301 | LOC11962 | 8.73173  | 0.036629 | 0.8962   | 0.040872 | 0.967398 | 0.977787 | 10.84173 | 3.284471 | 11.82743 | 6.696381 | 10.69555 | 9.044815 |
| 24749 | GK5      | 739.3933 | 0.036433 | 0.125833 | 0.289535 | 0.772172 | 0.829455 | 753.5001 | 769.661  | 666.5107 | 763.3874 | 731.5758 | 751.7246 |
| 24578 | DCUN1D4  | 1365.566 | 0.03636  | 0.11384  | 0.319395 | 0.749427 | 0.810598 | 1229.994 | 1423.818 | 1392.854 | 1296.866 | 1443.9   | 1405.966 |
| 26384 | EV12A    | 4.829892 | 0.036337 | 1.195294 | 0.0304   | 0.975748 | 0.983182 | 3.252518 | 3.831883 | 6.957314 | 2.32127  | 10.69555 | 2.009959 |
| 25309 | LOC11962 | 272.6456 | 0.036215 | 0.183146 | 0.197738 | 0.84325  | 0.885738 | 309.5313 | 245.2405 | 253.2462 | 283.4801 | 260.9715 | 283.4042 |
| 25358 | MOK      | 223.69   | 0.036171 | 0.191422 | 0.188958 | 0.850126 | 0.891261 | 211.9558 | 202.5424 | 247.6804 | 225.4448 | 237.4413 | 217.0756 |
| 25011 | LOC10322 | 680.9279 | 0.035909 | 0.147291 | 0.243798 | 0.807387 | 0.858164 | 609.3051 | 786.0834 |          |          |          |          |



|       |           |          |          |          |          |          |          |          |          |          |          |          |          |
|-------|-----------|----------|----------|----------|----------|----------|----------|----------|----------|----------|----------|----------|----------|
| 24633 | EWSR1     | 15643.12 | 0.035438 | 0.114345 | 0.309919 | 0.756623 | 0.81658  | 14056.84 | 17879.02 | 14421.12 | 15615.96 | 14877.51 | 17008.27 |
| 25802 | LRRRC36   | 80.20354 | 0.035425 | 0.295467 | 0.119895 | 0.904566 | 0.932016 | 86.19173 | 76.63765 | 75.13899 | 91.51721 | 66.31243 | 85.42325 |
| 26048 | RCAN2     | 31.1846  | 0.035067 | 0.449508 | 0.078012 | 0.937818 | 0.957152 | 31.44101 | 31.20247 | 29.91645 | 35.71403 | 25.66933 | 33.16432 |
| 26456 | LOC119621 | 1.748631 | 0.035052 | 1.831548 | 0.019138 | 0.984731 | 0.989533 | 0.542086 | 1.094824 | 3.478657 | 2.232127 | 2.139111 | 1.004979 |
| 24601 | LOC103233 | 1727.364 | 0.034848 | 0.110244 | 0.316098 | 0.751928 | 0.812569 | 1789.969 | 1669.059 | 1665.581 | 1763.38  | 1580.803 | 1895.391 |
| 24954 | SNAPC3    | 920.4691 | 0.034839 | 0.137185 | 0.253957 | 0.799529 | 0.851786 | 873.3011 | 1039.535 | 816.7886 | 848.2083 | 971.1562 | 973.8251 |
| 24245 | SPRPA     | 4634.297 | 0.034765 | 0.09422  | 0.368981 | 0.712142 | 0.780874 | 4640.801 | 4488.777 | 4613.395 | 4587.021 | 4391.594 | 5084.191 |
| 24757 | FAM120C   | 2006.31  | 0.034763 | 0.120258 | 0.289069 | 0.772528 | 0.82975  | 1846.888 | 2252.052 | 1851.341 | 1984.361 | 1912.365 | 2190.855 |
| 24572 | SMARCD3   | 1716.569 | 0.034711 | 0.108354 | 0.320343 | 0.748708 | 0.810044 | 1709.198 | 1608.843 | 1773.419 | 1799.094 | 1580.803 | 1828.058 |
| 25826 | LOC103238 | 80.08626 | 0.034621 | 0.298126 | 0.11613  | 0.907549 | 0.934185 | 83.4813  | 71.16354 | 81.40057 | 95.98146 | 79.14709 | 69.34358 |
| 24244 | PHF20     | 5798.035 | 0.034547 | 0.093614 | 0.369034 | 0.712102 | 0.780863 | 5624.688 | 6101.452 | 5464.97  | 5682.995 | 5677.2   | 6236.903 |
| 25276 | TAF1C     | 401.9029 | 0.034427 | 0.169781 | 0.202776 | 0.83931  | 0.882707 | 433.127  | 341.585  | 420.2217 | 379.4616 | 380.7617 | 456.2607 |
| 24773 | PARVB     | 1598.566 | 0.034427 | 0.120269 | 0.286249 | 0.774687 | 0.831351 | 1679.384 | 1567.787 | 1496.518 | 1640.613 | 1418.23  | 1788.863 |
| 24685 | STK38     | 1838.805 | 0.034416 | 0.114166 | 0.301456 | 0.763067 | 0.8218   | 1701.067 | 2024.876 | 1724.718 | 1752.22  | 1963.704 | 1866.247 |
| 24134 | TMBIM6    | 26348.39 | 0.034196 | 0.088895 | 0.384681 | 0.700474 | 0.77158  | 26619.69 | 25588.22 | 25909.04 | 25944.01 | 25096.05 | 28933.36 |
| 24682 | HIPK1     | 5795.943 | 0.034102 | 0.112874 | 0.302124 | 0.762558 | 0.821352 | 5353.103 | 6513.653 | 5319.562 | 5852.637 | 5435.48  | 6301.221 |
| 26198 | LOC119621 | 18.18645 | 0.034068 | 0.60255  | 0.05654  | 0.954911 | 0.969037 | 14.09425 | 16.42235 | 22.95914 | 22.32127 | 19.252   | 14.06971 |
| 24526 | IFT52     | 1493.653 | 0.034036 | 0.104253 | 0.326471 | 0.744068 | 0.806512 | 1543.862 | 1387.142 | 1495.127 | 1513.382 | 1555.133 | 1467.27  |
| 26123 | LOC103215 | 28.41685 | 0.033913 | 0.502609 | 0.067474 | 0.946204 | 0.962938 | 36.86187 | 24.08612 | 23.65487 | 33.4819  | 19.252   | 33.16432 |
| 26403 | TRNAF-GA  | 3.837809 | 0.033796 | 1.235975 | 0.027344 | 0.978185 | 0.984891 | 2.168345 | 4.926706 | 4.174388 | 4.464254 | 4.278221 | 3.014938 |
| 24986 | PASK      | 1073.595 | 0.033788 | 0.136419 | 0.24768  | 0.804382 | 0.855825 | 1109.109 | 1083.328 | 996.9831 | 1060.26  | 932.6523 | 1259.239 |
| 25074 | DRG2      | 1507.386 | 0.033747 | 0.14407  | 0.234238 | 0.8148   | 0.863867 | 1642.522 | 1214.159 | 1617.575 | 1415.169 | 1452.456 | 1702.435 |
| 26432 | LOC10323C | 3.189052 | 0.033689 | 1.455713 | 0.023143 | 0.981537 | 0.987218 | 3.252518 | 3.831883 | 2.782925 | 2.232127 | 0        | 7.034856 |
| 25528 | LOC119621 | 192.9268 | 0.033642 | 0.208688 | 0.161209 | 0.871929 | 0.908063 | 216.2925 | 166.4132 | 189.9347 | 178.5702 | 205.3546 | 200.9959 |
| 26294 | LOC10323C | 10.43317 | 0.033509 | 0.808603 | 0.04144  | 0.966945 | 0.977646 | 9.215468 | 14.23271 | 7.653045 | 4.464254 | 14.97377 | 12.05975 |
| 24830 | PRRC1     | 2684.972 | 0.033354 | 0.120668 | 0.276412 | 0.782232 | 0.83752  | 2463.783 | 3085.213 | 2412.796 | 2582.571 | 2827.904 | 2737.564 |
| 24781 | SFXN3     | 2194.75  | 0.033346 | 0.116783 | 0.285542 | 0.775229 | 0.831664 | 2231.227 | 2090.566 | 2194.337 | 2165.163 | 1963.704 | 2523.503 |
| 25148 | LOC10323C | 1427.126 | 0.033266 | 0.149775 | 0.222106 | 0.824232 | 0.87133  | 1184.459 | 1750.623 | 1296.843 | 1453.115 | 1422.509 | 1455.21  |
| 25563 | ZNF865    | 233.4264 | 0.033254 | 0.213245 | 0.155944 | 0.876077 | 0.911099 | 204.9086 | 285.2016 | 200.3706 | 256.6946 | 235.3022 | 218.0805 |
| 24643 | EXOC8     | 1424.391 | 0.033218 | 0.107768 | 0.308241 | 0.757899 | 0.817625 | 1360.095 | 1508.12  | 1358.763 | 1388.383 | 1422.509 | 1508.474 |
| 25186 | PPOX      | 812.4679 | 0.033181 | 0.153217 | 0.216561 | 0.828551 | 0.874574 | 903.658  | 655.7994 | 852.9667 | 814.7263 | 757.2452 | 890.4118 |
| 26452 | LOC103245 | 2.088291 | 0.033174 | 1.653533 | 0.020062 | 0.983994 | 0.988969 | 2.168345 | 3.284471 | 0.695731 | 2.232127 | 2.139111 | 2.009959 |
| 26105 | LOC119621 | 37.81849 | 0.033083 | 0.473121 | 0.069926 | 0.944253 | 0.961615 | 46.07734 | 21.89647 | 45.22254 | 31.24978 | 34.22577 | 48.23901 |
| 25801 | LOC119621 | 88.51216 | 0.033049 | 0.27574  | 0.119855 | 0.904598 | 0.932016 | 80.77087 | 89.22813 | 91.83654 | 95.98146 | 89.84265 | 83.4133  |
| 25226 | ZNRF1     | 737.14   | 0.03292  | 0.156304 | 0.210616 | 0.833187 | 0.878073 | 770.3047 | 655.2519 | 767.3917 | 683.0309 | 652.4288 | 894.4317 |
| 24776 | ZNF622    | 1315.472 | 0.032881 | 0.115001 | 0.285923 | 0.774937 | 0.831518 | 1314.559 | 1301.745 | 1291.973 | 1270.08  | 1232.128 | 1482.345 |
| 25549 | PHETA2    | 176.2418 | 0.032812 | 0.208241 | 0.157566 | 0.874799 | 0.910272 | 173.4676 | 159.8442 | 189.9347 | 189.7308 | 162.5724 | 181.9013 |
| 25263 | LOC119621 | 16618.63 | 0.032804 | 0.159991 | 0.205039 | 0.837542 | 0.88137  | 16375.35 | 13235.87 | 19685.02 | 16517.74 | 13613.3  | 20284.51 |
| 25318 | FAM131A   | 713.3586 | 0.032779 | 0.166385 | 0.19701  | 0.843819 | 0.886076 | 812.0454 | 560.0023 | 747.2155 | 654.0132 | 705.9065 | 800.9686 |
| 24815 | EXT2      | 5359.867 | 0.032716 | 0.117689 | 0.277987 | 0.817022 | 0.836731 | 5800.866 | 4861.017 | 5243.032 | 5261.123 | 4838.668 | 6154.494 |
| 24804 | SERINC3   | 7139.557 | 0.032692 | 0.116812 | 0.279865 | 0.779581 | 0.835557 | 6720.787 | 8233.621 | 6223.317 | 6968.7   | 7159.603 | 7531.316 |
| 25076 | GID8      | 1256.269 | 0.032558 | 0.139078 | 0.234099 | 0.814908 | 0.863947 | 1131.334 | 1485.128 | 1111.083 | 1258.92  | 1223.571 | 1327.578 |
| 25151 | NFIA      | 836.8227 | 0.032332 | 0.146173 | 0.221189 | 0.824945 | 0.87198  | 742.1162 | 986.4361 | 752.7813 | 832.5834 | 874.8963 | 832.123  |
| 25097 | FBLIM1    | 1218.416 | 0.032282 | 0.139871 | 0.230801 | 0.81747  | 0.865937 | 1290.166 | 1081.686 | 1248.142 | 1252.223 | 1035.33  | 1402.951 |
| 24450 | TUFT1     | 4233.566 | 0.032233 | 0.095484 | 0.33757  | 0.735687 | 0.799895 | 4287.903 | 4252.295 | 4023.415 | 4343.719 | 3944.52  | 4549.542 |
| 24983 | KRI1      | 1935.968 | 0.032223 | 0.129726 | 0.248391 | 0.803832 | 0.855376 | 1738.471 | 2245.483 | 1762.288 | 1828.112 | 1938.034 | 2103.422 |
| 24704 | PHKG2     | 1285.248 | 0.032208 | 0.107997 | 0.298229 | 0.765528 | 0.823842 | 1346     | 1233.866 | 1235.619 | 1290.169 | 1247.102 | 1358.732 |
| 24683 | MEGF9     | 4145.496 | 0.032206 | 0.106634 | 0.302023 | 0.762635 | 0.821401 | 3846.645 | 4502.462 | 3954.537 | 3944.168 | 4068.588 | 4556.577 |
| 24957 | DCAF12    | 633.5455 | 0.032196 | 0.126929 | 0.253654 | 0.799763 | 0.851933 | 660.8033 | 609.8168 | 607.3735 | 633.9241 | 665.2634 | 624.0923 |
| 24584 | AP2A2     | 4732.285 | 0.032171 | 0.100918 | 0.318785 | 0.74989  | 0.810894 | 4576.293 | 5015.934 | 4452.681 | 4651.753 | 4494.272 | 5202.779 |
| 24907 | HCYV1     | 5967.85  | 0.032164 | 0.122099 | 0.263424 | 0.792224 | 0.845596 | 5391.049 | 6993.733 | 5321.649 | 5906.208 | 5809.825 | 6384.635 |
| 25104 | LOC119621 | 574.0217 | 0.032062 | 0.139709 | 0.229488 | 0.818489 | 0.866776 | 573.5274 | 534.2739 | 599.7204 | 542.4069 | 554.0297 | 640.1719 |
| 24689 | DNAJB14   | 4064.577 | 0.032047 | 0.106441 | 0.301082 | 0.763352 | 0.821974 | 3826.588 | 4516.695 | 3711.727 | 4136.131 | 4239.717 | 3956.604 |
| 25049 | ADIPOR1   | 5230.186 | 0.031984 | 0.134553 | 0.237706 | 0.812109 | 0.861908 | 4632.128 | 6383.369 | 4501.382 | 5241.034 | 5219.43  | 5403.775 |
| 24782 | NCOA5     | 1905.376 | 0.031902 | 0.111909 | 0.285071 | 0.77559  | 0.832017 | 1774.249 | 2090.566 | 1791.508 | 1870.522 | 1865.305 | 2040.108 |
| 25342 | NDUFB2    | 3191.153 | 0.031752 | 0.165515 | 0.191836 | 0.84787  | 0.88947  | 3727.386 | 2251.505 | 3491.876 | 3241.048 | 2949.834 | 3485.269 |
| 25238 | ZDHHC8    | 1069.257 | 0.031462 | 0.150134 | 0.209557 | 0.834014 | 0.878559 | 1112.903 | 869.8374 | 1191.788 | 1174.099 | 943.3478 | 1123.567 |
| 24918 | UBXN6     | 1873.787 | 0.031195 | 0.119482 | 0.261081 | 0.79403  | 0.84715  | 2065.349 | 1615.412 | 1881.953 | 1890.612 | 1824.661 | 1964.735 |
| 25273 | MYEF2     | 4244.374 | 0.031152 | 0.15338  | 0.203101 | 0.839056 | 0.882614 | 3492.12  | 5430.325 | 3674.157 | 4196.399 | 4199.074 | 4474.169 |
| 25199 | ECI1      | 973.6636 | 0.031111 | 0.144878 | 0.214739 | 0.829971 | 0.875621 | 1068.452 | 828.2341 | 996.2873 | 1022.314 | 851.366  | 1075.328 |
| 25224 | CCNYL1    | 837.7891 | 0.031049 | 0.147371 | 0.210682 | 0.833135 | 0.878057 | 750.2475 | 985.3413 | 751.3899 | 877.2259 | 787.1927 | 875.3371 |
| 26211 | RIPOR2    | 19.24467 | 0.030944 | 0.570002 | 0.054287 | 0.956706 | 0.970357 | 20.59928 | 21.34906 | 15.30609 | 17.85702 | 19.252   | 21.10457 |
| 26136 | LOC11962C | 33.95914 | 0.030836 | 0.470012 | 0.065606 | 0.947691 | 0.963972 | 31.9831  | 33.93953 | 33.39511 | 49.10679 | 34.22577 | 21.10457 |
| 25909 | LOC119615 | 91.09324 | 0.030832 | 0.298482 | 0.103296 | 0.917728 | 0.941672 | 75.35001 | 82.65918 | 111.317  | 100.4457 | 98.39909 | 78.3884  |
| 26319 | LOC103234 | 10.1078  | 0.030815 | 0.807011 | 0.038184 | 0.969541 | 0.979265 | 8.131296 | 7.663765 | 13.91463 | 8.928508 | 14.97377 | 7.034856 |
| 24562 | CYB5A     | 2373.68  | 0.030732 | 0.095406 | 0.32212  | 0.747362 | 0.808884 | 2297.362 | 2293.108 | 2451.062 | 2453.108 | 2462.116 | 2285.323 |
| 24565 | MOB1B     | 4348.491 | 0.030669 | 0.095436 | 0.321354 | 0.747942 | 0.809446 | 4124.735 | 4657.38  | 4127.774 | 4323.63  | 4286.778 | 4570.647 |
| 25156 | PITPNM1   | 4030.819 | 0.030638 | 0.138938 | 0.220518 | 0.825468 | 0.872272 | 4163.765 | 3244.51  | 4561.215 | 4053.543 | 3619.375 | 4542.507 |
| 25490 | CHID1     | 1963.141 | 0.030531 | 0.183968 | 0.165959 | 0.868189 | 0.905485 | 2268.089 | 1355.392 | 2207.556 | 1988.825 | 1670.645 | 2288.338 |
| 26142 | LOC11962C | 31.99225 | 0.0305   | 0.470224 | 0.064864 | 0.94828  |          |          |          |          |          |          |          |



|       |           |          |          |          |          |          |          |          |          |          |          |          |          |
|-------|-----------|----------|----------|----------|----------|----------|----------|----------|----------|----------|----------|----------|----------|
| 24870 | CTC1      | 1272.415 | 0.029984 | 0.110885 | 0.270408 | 0.786847 | 0.841108 | 1277.155 | 1244.267 | 1262.057 | 1196.42  | 1255.658 | 1398.931 |
| 25476 | SFT2D3    | 264.3414 | 0.02997  | 0.177927 | 0.168439 | 0.866238 | 0.903946 | 276.464  | 251.262  | 258.8121 | 276.7837 | 235.3022 | 287.4241 |
| 26254 | CSNK1A1L  | 17.7584  | 0.029895 | 0.62986  | 0.047463 | 0.962145 | 0.974238 | 14.63633 | 18.612   | 19.48048 | 8.928508 | 27.80844 | 17.08465 |
| 25110 | BOLA3     | 1113.403 | 0.029841 | 0.130539 | 0.228597 | 0.819182 | 0.867302 | 1149.765 | 950.8543 | 1204.311 | 1205.349 | 1071.694 | 1098.443 |
| 24714 | RARS1     | 4796.905 | 0.02972  | 0.100479 | 0.295785 | 0.767395 | 0.825324 | 4560.031 | 5237.636 | 4447.811 | 4749.966 | 4718.878 | 5067.106 |
| 25187 | RANBP10   | 961.229  | 0.029564 | 0.136577 | 0.216464 | 0.828626 | 0.874619 | 925.3414 | 1085.518 | 846.0093 | 897.315  | 969.0171 | 1044.174 |
| 24991 | UFL1      | 2756.361 | 0.02951  | 0.11949  | 0.246966 | 0.804935 | 0.856276 | 2534.311 | 3149.26  | 2483.761 | 2732.123 | 2661.054 | 2957.655 |
| 25457 | TMEM216   | 537.2141 | 0.029367 | 0.172256 | 0.170485 | 0.864629 | 0.902834 | 575.6957 | 413.2959 | 605.982  | 569.1924 | 530.4994 | 528.6192 |
| 25181 | IER5      | 666.0391 | 0.029099 | 0.134016 | 0.217127 | 0.82811  | 0.874306 | 695.4968 | 621.8598 | 665.1192 | 620.5313 | 654.5679 | 738.6599 |
| 25231 | MAST4     | 1177.095 | 0.029034 | 0.138135 | 0.210186 | 0.833522 | 0.878253 | 1034.843 | 1351.56  | 1113.17  | 1087.046 | 1176.511 | 1299.438 |
| 24691 | LOC103221 | 4182.593 | 0.029001 | 0.096435 | 0.300728 | 0.763622 | 0.822198 | 4075.947 | 4471.807 | 3874.528 | 4323.63  | 4049.336 | 4300.307 |
| 24890 | KDM6A     | 2846.465 | 0.028854 | 0.108046 | 0.267055 | 0.789427 | 0.843187 | 2669.775 | 3127.911 | 2656.302 | 3017.836 | 2699.558 | 2907.406 |
| 24881 | GNL2      | 3350.941 | 0.028821 | 0.107009 | 0.269331 | 0.787675 | 0.84162  | 3169.579 | 3707.073 | 3078.611 | 3303.548 | 3294.23  | 3552.602 |
| 24574 | SMIM14    | 6338.412 | 0.028803 | 0.090034 | 0.319913 | 0.749034 | 0.810331 | 6667.662 | 5859.496 | 6300.543 | 6319.151 | 6338.185 | 6545.431 |
| 25054 | PI4KA     | 2562.727 | 0.02875  | 0.121124 | 0.237359 | 0.812378 | 0.862036 | 2302.783 | 2812.054 | 2503.241 | 2491.054 | 2365.856 | 2901.376 |
| 25102 | AP1M1     | 2888.907 | 0.028726 | 0.124846 | 0.230088 | 0.818024 | 0.866377 | 3108.323 | 2526.853 | 2951.988 | 2859.355 | 2592.602 | 3294.323 |
| 26092 | RAP1GAP2  | 51.10646 | 0.028714 | 0.398521 | 0.072052 | 0.942561 | 0.96037  | 43.36691 | 50.9093  | 55.65851 | 62.49956 | 62.03421 | 32.15934 |
| 25196 | FAM117A   | 678.0658 | 0.028431 | 0.132107 | 0.215215 | 0.8296   | 0.875346 | 666.2241 | 689.1915 | 662.3363 | 602.6743 | 712.3239 | 735.645  |
| 25021 | PDZD11    | 1832.785 | 0.028428 | 0.117433 | 0.242077 | 0.80872  | 0.859272 | 1650.653 | 2029.803 | 1760.2   | 1975.432 | 1828.94  | 1751.679 |
| 25436 | NAIF1     | 439.2094 | 0.028349 | 0.16164  | 0.175385 | 0.860777 | 0.89966  | 485.1673 | 395.7787 | 424.3961 | 486.6037 | 385.0399 | 458.2706 |
| 26193 | TRNAL-AAI | 35.10806 | 0.028306 | 0.48955  | 0.05782  | 0.953892 | 0.968204 | 46.61943 | 20.25424 | 38.26523 | 33.4819  | 27.80844 | 44.2191  |
| 24545 | COQ9      | 3304.989 | 0.028259 | 0.087291 | 0.323731 | 0.746142 | 0.808165 | 3194.515 | 3277.902 | 3347.164 | 3236.584 | 3399.047 | 3374.721 |
| 25606 | FRS3      | 211.3318 | 0.028189 | 0.187871 | 0.150044 | 0.88073  | 0.914403 | 204.9086 | 218.9647 | 205.2408 | 203.1236 | 209.6328 | 226.1204 |
| 24921 | RALY      | 4009.168 | 0.027777 | 0.106478 | 0.260869 | 0.794194 | 0.847223 | 3764.248 | 4287.329 | 3866.179 | 4035.686 | 3685.688 | 4415.88  |
| 25558 | LOC103221 | 401.5545 | 0.027692 | 0.177056 | 0.156405 | 0.875713 | 0.910902 | 348.0194 | 473.5112 | 368.7376 | 428.5684 | 425.683  | 364.8075 |
| 24825 | PSPC1     | 3409.952 | 0.027578 | 0.099539 | 0.277053 | 0.78174  | 0.837162 | 3448.753 | 3610.728 | 3072.35  | 3350.423 | 3510.281 | 3467.179 |
| 25096 | LOC103234 | 709.2886 | 0.0275   | 0.118882 | 0.231323 | 0.817064 | 0.865542 | 703.6281 | 716.5621 | 687.3826 | 707.5843 | 723.0194 | 717.5553 |
| 26149 | CD300LG   | 38.97382 | 0.027393 | 0.428038 | 0.063996 | 0.948974 | 0.964806 | 46.61943 | 31.74989 | 36.87376 | 51.33892 | 32.08666 | 35.17428 |
| 25189 | NAB2      | 2205.263 | 0.027253 | 0.126086 | 0.216149 | 0.828871 | 0.874795 | 2369.46  | 1875.433 | 2313.307 | 2218.734 | 2023.599 | 2431.045 |
| 25355 | ABCG2     | 470.8347 | 0.027189 | 0.143754 | 0.189133 | 0.849989 | 0.89118  | 479.2044 | 489.9336 | 427.8748 | 499.9964 | 472.7435 | 455.2557 |
| 24984 | F2RL1     | 1357.065 | 0.027157 | 0.109474 | 0.248071 | 0.804079 | 0.855605 | 1425.687 | 1305.03  | 1305.192 | 1386.151 | 1279.188 | 1441.141 |
| 26167 | LOC119621 | 35.4089  | 0.027115 | 0.449094 | 0.060376 | 0.951856 | 0.96698  | 27.10432 | 43.24553 | 34.09084 | 44.64254 | 34.22577 | 29.1444  |
| 24829 | EXOC6     | 2466.697 | 0.027003 | 0.097669 | 0.27649  | 0.782172 | 0.83749  | 2370.002 | 2604.585 | 2352.963 | 2488.822 | 2581.907 | 2401.901 |
| 24962 | FIGA      | 1277.214 | 0.026975 | 0.106808 | 0.252552 | 0.800615 | 0.852643 | 1268.482 | 1324.737 | 1205.007 | 1265.616 | 1257.797 | 1341.648 |
| 24811 | PURB      | 4492.997 | 0.026632 | 0.095531 | 0.278778 | 0.780415 | 0.836184 | 4300.371 | 4796.97  | 4261.355 | 4397.29  | 4434.376 | 4767.623 |
| 25131 | FAM3A     | 1606.426 | 0.026363 | 0.11639  | 0.226504 | 0.82081  | 0.868299 | 1649.027 | 1422.723 | 1707.325 | 1627.221 | 1518.769 | 1713.49  |
| 24669 | ACTR3     | 11101.88 | 0.026355 | 0.086344 | 0.305235 | 0.760187 | 0.819269 | 10784.27 | 11685.05 | 10535.46 | 10964.21 | 11037.81 | 11604.5  |
| 25964 | MSX2      | 99.24532 | 0.026139 | 0.279236 | 0.09361  | 0.925419 | 0.947516 | 96.49137 | 117.1461 | 82.0963  | 98.21359 | 91.98176 | 109.5428 |
| 25228 | SCAF1     | 1742.235 | 0.026136 | 0.12418  | 0.210472 | 0.833299 | 0.878122 | 1751.481 | 1641.141 | 1793.595 | 1774.541 | 1503.795 | 1988.854 |
| 24742 | ELP1      | 5447.466 | 0.02613  | 0.089676 | 0.291383 | 0.770758 | 0.828171 | 5497.84  | 5483.424 | 5219.377 | 5321.391 | 5300.716 | 5862.045 |
| 25365 | LOC119621 | 483.7422 | 0.026051 | 0.138425 | 0.1882   | 0.85072  | 0.891638 | 489.504  | 489.9336 | 456.3998 | 491.0679 | 511.2474 | 464.3005 |
| 25431 | FRRS1     | 696.6307 | 0.025883 | 0.147242 | 0.175783 | 0.860465 | 0.89951  | 780.6044 | 587.3729 | 703.3844 | 741.0662 | 658.8461 | 708.5105 |
| 25193 | XPR1      | 6221.21  | 0.025845 | 0.119717 | 0.215884 | 0.829078 | 0.874945 | 5691.907 | 7253.207 | 5554.024 | 6062.457 | 6115.717 | 6649.949 |
| 24955 | MAP3K2    | 6353.749 | 0.025844 | 0.101796 | 0.253879 | 0.799589 | 0.851816 | 5978.128 | 6989.354 | 5926.936 | 6232.099 | 6218.395 | 6777.582 |
| 26379 | LOC103221 | 9.748632 | 0.02576  | 0.834651 | 0.030863 | 0.975378 | 0.982961 | 9.215468 | 13.6853  | 5.565851 | 11.16063 | 12.83466 | 6.029877 |
| 25881 | PMEL      | 267.77   | 0.025602 | 0.241269 | 0.106114 | 0.915492 | 0.940191 | 332.2989 | 195.9734 | 271.3352 | 223.2127 | 248.1368 | 335.6631 |
| 25455 | SHROOM4   | 606.7121 | 0.025596 | 0.149495 | 0.171216 | 0.864054 | 0.902443 | 702.5439 | 547.4118 | 554.4979 | 591.5136 | 618.203  | 626.1022 |
| 26356 | ACCSL     | 12.23355 | 0.025452 | 0.761387 | 0.033429 | 0.973332 | 0.981772 | 11.9259  | 10.40082 | 13.2189  | 17.85702 | 14.97377 | 5.024897 |
| 26237 | LOC119611 | 26.35289 | 0.025444 | 0.500395 | 0.050844 | 0.95945  | 0.972139 | 30.89892 | 19.70683 | 27.82925 | 29.01765 | 23.53022 | 27.13445 |
| 25421 | LOC103231 | 2183.293 | 0.025423 | 0.14296  | 0.177834 | 0.858853 | 0.988209 | 1947.174 | 2677.391 | 1868.734 | 2162.931 | 2139.111 | 2304.418 |
| 26442 | LOC103241 | 4.596473 | 0.025212 | 1.170674 | 0.021536 | 0.982818 | 0.988116 | 5.96295  | 2.189647 | 5.565851 | 6.696381 | 2.139111 | 5.024897 |
| 25517 | MED31     | 482.5729 | 0.025209 | 0.155232 | 0.162395 | 0.870995 | 0.90745  | 493.2986 | 446.688  | 494.665  | 560.2639 | 417.1266 | 483.3951 |
| 26176 | LOC103211 | 38.22386 | 0.025015 | 0.419631 | 0.059613 | 0.952464 | 0.967346 | 36.31979 | 31.20247 | 45.91827 | 37.94616 | 42.78221 | 35.17428 |
| 25573 | RTN1      | 387.8217 | 0.024937 | 0.160766 | 0.155113 | 0.876733 | 0.911427 | 407.6489 | 384.8305 | 363.8675 | 397.3186 | 340.1186 | 433.1462 |
| 25599 | TBCA      | 1730.851 | 0.024924 | 0.164931 | 0.15112  | 0.879881 | 0.913735 | 1388.283 | 2122.316 | 1632.186 | 1830.344 | 1948.73  | 1463.25  |
| 25082 | LAMTOR1   | 2739.951 | 0.024766 | 0.106128 | 0.233358 | 0.815483 | 0.86435  | 2867.095 | 2418.465 | 2866.413 | 2714.266 | 2727.366 | 2846.102 |
| 25185 | VPS16     | 3120.31  | 0.024748 | 0.114254 | 0.216608 | 0.828514 | 0.87457  | 3282.333 | 2932.485 | 3074.437 | 2917.39  | 2928.443 | 3586.772 |
| 25420 | HSD17B8   | 1434.206 | 0.024625 | 0.138498 | 0.177798 | 0.858882 | 0.898209 | 1561.209 | 1202.664 | 1507.65  | 1323.651 | 1384.005 | 1626.057 |
| 25500 | CUNH3orf1 | 505.8059 | 0.02456  | 0.149634 | 0.164135 | 0.869625 | 0.906627 | 530.7026 | 464.7526 | 507.1882 | 470.9788 | 581.8381 | 479.3752 |
| 25157 | FEM1B     | 5940.527 | 0.024438 | 0.110821 | 0.220521 | 0.825465 | 0.872272 | 5550.964 | 6762.178 | 5359.219 | 5950.851 | 5799.129 | 6220.823 |
| 26233 | LOC119621 | 34.26272 | 0.02441  | 0.473641 | 0.051537 | 0.958898 | 0.971812 | 44.45108 | 24.08612 | 33.39511 | 24.5534  | 44.92132 | 34.1693  |
| 25215 | APAF1     | 950.1936 | 0.024371 | 0.115131 | 0.211684 | 0.832354 | 0.877543 | 996.8968 | 918.0096 | 912.7996 | 908.4757 | 986.13   | 978.85   |
| 26440 | LOC119621 | 4.878303 | 0.024271 | 1.09737  | 0.022118 | 0.982354 | 0.987742 | 5.96295  | 4.926706 | 3.478657 | 4.464254 | 6.417332 | 4.019918 |
| 26204 | DNASE1L2  | 51.40059 | 0.024207 | 0.435206 | 0.055622 | 0.955643 | 0.969538 | 53.12446 | 29.01283 | 71.66033 | 55.80317 | 38.50399 | 60.29877 |
| 25229 | UPF1      | 4799.492 | 0.024196 | 0.115015 | 0.210368 | 0.833338 | 0.878173 | 4965.511 | 4371.083 | 4950.129 | 4564.7   | 4415.124 | 5530.402 |
| 25636 | LOC103241 | 332.3647 | 0.024094 | 0.166866 | 0.144389 | 0.885194 | 0.917961 | 355.0666 | 303.8136 | 326.9937 | 357.1403 | 348.675  | 302.4988 |
| 25729 | COMMD4    | 1453.923 | 0.023963 | 0.183636 | 0.130489 | 0.89618  | 0.925995 | 1788.343 | 987.5309 | 1551.481 | 1446.418 | 1384.005 | 1565.758 |
| 25461 | IDNK      | 635.0781 | 0.02383  | 0.139869 | 0.170374 | 0.864716 | 0.90289  | 692.7864 | 638.2822 | 556.5851 | 674.1023 | 624.6203 | 624.0923 |
| 26219 | LOC119621 | 34.6159  | 0.023785 | 0.447158 | 0.053191 | 0.95758  | 0.970958 | 38.48813 | 30.65506 | 32.69937 | 37.94616 | 42.78221 | 25.12449 |
| 25338 | ZFAND2B   | 1100.629 | 0.023743 |          |          |          |          |          |          |          |          |          |          |



|                 |          |          |          |          |          |          |          |          |          |          |          |          |
|-----------------|----------|----------|----------|----------|----------|----------|----------|----------|----------|----------|----------|----------|
| 25391 THOC7     | 2819.004 | 0.023236 | 0.12696  | 0.183021 | 0.854782 | 0.895012 | 2515.823 | 3246.152 | 2622.212 | 2837.033 | 3105.989 | 2586.817 |
| 25680 LSM7      | 833.8329 | 0.023224 | 0.167796 | 0.138408 | 0.889918 | 0.92128  | 910.7051 | 634.9977 | 939.2374 | 772.3159 | 817.1403 | 928.601  |
| 25592 GSTP1     | 11349.08 | 0.023107 | 0.151101 | 0.152922 | 0.87846  | 0.912533 | 13118.49 | 8366.642 | 12292.88 | 11415.1  | 10451.69 | 12449.69 |
| 24967 SAMD8     | 3167.992 | 0.023091 | 0.091609 | 0.252067 | 0.80099  | 0.852898 | 3184.757 | 3173.346 | 3075.133 | 3049.085 | 3150.91  | 3374.721 |
| 25806 LOC103247 | 341.2782 | 0.022955 | 0.192196 | 0.119436 | 0.90493  | 0.932247 | 330.1306 | 408.9166 | 274.8139 | 332.5869 | 378.6226 | 322.5984 |
| 25643 EIF4E3    | 429.4244 | 0.022798 | 0.158995 | 0.143387 | 0.885985 | 0.918532 | 424.4536 | 482.2698 | 371.5206 | 421.872  | 434.2395 | 442.191  |
| 25280 TMEM165   | 1628.015 | 0.022787 | 0.112636 | 0.20231  | 0.839675 | 0.88302  | 1732.508 | 1441.335 | 1670.451 | 1638.381 | 1683.48  | 1601.937 |
| 26386 LOC103235 | 11.24934 | 0.022738 | 0.753372 | 0.030182 | 0.975922 | 0.983282 | 14.63633 | 7.116354 | 11.82743 | 11.16063 | 10.69555 | 12.05975 |
| 25109 AKAP8L    | 2263.532 | 0.022716 | 0.099326 | 0.228705 | 0.819098 | 0.867248 | 2236.648 | 2328.69  | 2176.943 | 2247.752 | 2154.084 | 2437.075 |
| 25405 LOC119625 | 747.0327 | 0.02251  | 0.124785 | 0.18039  | 0.856846 | 0.896695 | 706.8806 | 784.4411 | 731.9094 | 801.3336 | 705.9065 | 751.7246 |
| 25392 ISOC1     | 821.4145 | 0.022504 | 0.123131 | 0.182764 | 0.854983 | 0.895152 | 842.9443 | 857.2469 | 745.824  | 830.3512 | 797.8883 | 854.2325 |
| 25352 ATG14     | 1225.864 | 0.02249  | 0.118618 | 0.189598 | 0.849624 | 0.890946 | 1156.27  | 1351.56  | 1143.087 | 1227.67  | 1187.206 | 1289.389 |
| 25955 LIPT1     | 122.1117 | 0.022443 | 0.237703 | 0.094415 | 0.924779 | 0.947226 | 117.6327 | 121.5254 | 123.1445 | 129.4634 | 128.3466 | 112.5577 |
| 25277 TUBGCP5   | 1155.83  | 0.02243  | 0.110613 | 0.202782 | 0.839306 | 0.882707 | 1216.442 | 1149.017 | 1076.296 | 1154.01  | 1142.285 | 1196.931 |
| 25598 SCR3      | 741.4075 | 0.022255 | 0.146757 | 0.151642 | 0.879469 | 0.91338  | 650.5036 | 863.8158 | 690.8613 | 752.2268 | 776.4972 | 714.5404 |
| 26468 LOC119625 | 3.190509 | 0.021992 | 1.411815 | 0.015577 | 0.987572 | 0.991937 | 2.168345 | 1.094824 | 6.261582 | 4.464254 | 2.139111 | 3.014938 |
| 25362 TRIM68    | 1071.956 | 0.02198  | 0.116533 | 0.188616 | 0.850394 | 0.891401 | 1041.348 | 1150.66  | 1001.853 | 1035.707 | 1069.555 | 1132.612 |
| 25295 USP47     | 6930.453 | 0.021963 | 0.110076 | 0.199524 | 0.841853 | 0.884786 | 6559.245 | 7762.847 | 6315.849 | 6607.096 | 6785.259 | 7552.421 |
| 26175 LOC119625 | 72.87765 | 0.021881 | 0.364591 | 0.060015 | 0.952144 | 0.967058 | 97.03346 | 53.09895 | 65.39875 | 69.19594 | 96.25998 | 56.27885 |
| 25265 POC1B     | 1813.971 | 0.021871 | 0.106773 | 0.20484  | 0.837697 | 0.881463 | 1742.808 | 1955.902 | 1704.542 | 1819.183 | 1751.932 | 1909.461 |
| 25030 ACTG1     | 67005.13 | 0.021867 | 0.090801 | 0.240829 | 0.809688 | 0.860019 | 69061.26 | 64010.51 | 66428.43 | 66155.78 | 63103.76 | 73271.04 |
| 25275 LOC119618 | 1278.344 | 0.021863 | 0.107683 | 0.203026 | 0.839115 | 0.882622 | 1277.155 | 1314.883 | 1217.53  | 1265.616 | 1232.128 | 1362.752 |
| 26340 MMP2      | 18.86028 | 0.021857 | 0.610934 | 0.035776 | 0.971461 | 0.980497 | 19.51511 | 17.51718 | 18.08902 | 22.32127 | 25.66933 | 10.04979 |
| 25032 DUSP3     | 8894.898 | 0.021805 | 0.090662 | 0.240509 | 0.809936 | 0.860185 | 8958.519 | 8781.58  | 8750.909 | 8772.259 | 8396.009 | 9710.112 |
| 26172 LOC119625 | 54.1243  | 0.02169  | 0.360098 | 0.060233 | 0.95197  | 0.966992 | 64.50828 | 43.24553 | 53.57132 | 55.80317 | 51.33866 | 56.27885 |
| 25334 PPFA1     | 3876.653 | 0.021646 | 0.111927 | 0.193397 | 0.846648 | 0.888456 | 3708.413 | 4307.584 | 3531.532 | 3785.687 | 3685.688 | 4241.013 |
| 26247 LOC103215 | 35.96574 | 0.021421 | 0.436332 | 0.049093 | 0.960845 | 0.973219 | 36.31979 | 37.77142 | 34.09084 | 35.71403 | 25.66933 | 46.22906 |
| 26251 LOC119625 | 41.60514 | 0.021346 | 0.442124 | 0.048281 | 0.961493 | 0.973726 | 48.24569 | 49.26706 | 25.74206 | 35.71403 | 53.47777 | 37.18424 |
| 25981 LOC103218 | 340.5718 | 0.021323 | 0.23432  | 0.090998 | 0.927494 | 0.949052 | 272.6694 | 474.606  | 266.4651 | 370.5331 | 314.4493 | 344.708  |
| 26169 TMEM258   | 1917.367 | 0.021314 | 0.353128 | 0.060358 | 0.951871 | 0.96698  | 2266.463 | 1100.298 | 2343.919 | 1897.308 | 1696.315 | 2199.9   |
| 25072 DPH3      | 5882.031 | 0.021308 | 0.0908   | 0.234673 | 0.814462 | 0.863612 | 5985.718 | 5392.006 | 6137.742 | 5959.779 | 5948.867 | 5868.075 |
| 25406 LIMK2     | 1537.946 | 0.021275 | 0.118273 | 0.179881 | 0.857246 | 0.897027 | 1647.4   | 1413.417 | 1524.347 | 1529.007 | 1416.091 | 1697.41  |
| 25272 ZDHHC5    | 4728.381 | 0.021257 | 0.104661 | 0.203105 | 0.839053 | 0.882614 | 4744.34  | 4792.59  | 4552.17  | 4622.735 | 4321.004 | 5337.446 |
| 26157 NCCRP1    | 66.10599 | 0.021169 | 0.338523 | 0.062533 | 0.950138 | 0.965685 | 48.78777 | 75.54283 | 73.05179 | 64.73168 | 64.17332 | 70.34856 |
| 26011 GFOD1     | 128.6167 | 0.020942 | 0.246037 | 0.085116 | 0.932169 | 0.952703 | 134.4374 | 134.1159 | 112.7085 | 124.9991 | 151.8769 | 113.5627 |
| 26262 LOC119625 | 34.04814 | 0.020869 | 0.451535 | 0.046219 | 0.963136 | 0.974982 | 42.28274 | 32.84471 | 25.74206 | 40.17829 | 32.08666 | 31.15436 |
| 26420 LOC119625 | 10.6233  | 0.020538 | 0.827802 | 0.024811 | 0.980206 | 0.986328 | 13.01007 | 6.02153  | 12.52316 | 17.85702 | 4.278221 | 10.04979 |
| 25690 DNAJB5    | 765.8232 | 0.020512 | 0.15039  | 0.136394 | 0.89151  | 0.922569 | 676.5238 | 905.4191 | 701.2972 | 741.0662 | 746.5496 | 824.0832 |
| 25237 AP2M1     | 11683.54 | 0.02049  | 0.097795 | 0.209517 | 0.834045 | 0.878559 | 11620.71 | 12419.68 | 10767.14 | 11528.94 | 11069.9  | 12694.9  |
| 25183 IL13RA1   | 4623.323 | 0.02037  | 0.093912 | 0.216907 | 0.828281 | 0.874393 | 4416.92  | 4967.215 | 4387.282 | 4774.52  | 4534.915 | 4659.085 |
| 26425 LOC119625 | 9.055914 | 0.020356 | 0.841936 | 0.024178 | 0.980711 | 0.986649 | 7.589209 | 9.306001 | 9.740239 | 6.696381 | 14.97377 | 6.029877 |
| 25610 IFIH1     | 803.3131 | 0.020303 | 0.136164 | 0.149107 | 0.881469 | 0.915028 | 756.7526 | 915.82   | 720.082  | 801.3336 | 812.8621 | 813.0284 |
| 26308 LOC119625 | 63.75585 | 0.020056 | 0.500953 | 0.040036 | 0.968065 | 0.978257 | 34.15144 | 117.1461 | 39.65669 | 62.49956 | 40.6431  | 88.43819 |
| 26488 LOC119625 | 2.46209  | 0.020048 | 1.50783  | 0.013296 | 0.989391 | 0.992922 | 2.710432 | 3.284471 | 1.391463 | 2.232127 | 2.139111 | 3.014938 |
| 25377 LOC119625 | 4086.915 | 0.019978 | 0.107817 | 0.185299 | 0.852995 | 0.893599 | 4344.28  | 3751.961 | 4086.726 | 3999.972 | 3799.061 | 4539.492 |
| 25384 LOC103225 | 4176.524 | 0.019944 | 0.108646 | 0.183567 | 0.854353 | 0.89475  | 4440.772 | 3813.271 | 4195.956 | 4102.649 | 3867.512 | 4638.985 |
| 26260 LOC119625 | 35.14087 | 0.019855 | 0.426821 | 0.046517 | 0.962898 | 0.974812 | 31.9831  | 35.58177 | 37.56949 | 29.01765 | 38.50399 | 38.18922 |
| 26060 LOC103235 | 141.3209 | 0.019389 | 0.254819 | 0.076088 | 0.939349 | 0.958273 | 158.2892 | 118.241  | 143.3207 | 122.767  | 179.6853 | 125.6224 |
| 26185 NXPH4     | 78.98278 | 0.019311 | 0.330696 | 0.058395 | 0.953434 | 0.967999 | 61.79785 | 105.6505 | 68.18167 | 71.42806 | 83.42532 | 83.4133  |
| 26087 DNHD1     | 119.0312 | 0.019233 | 0.26297  | 0.073139 | 0.941695 | 0.959672 | 118.7169 | 123.1677 | 109.9256 | 136.1597 | 134.764  | 91.45313 |
| 25213 CASP3     | 2708.41  | 0.019119 | 0.090167 | 0.212038 | 0.832077 | 0.877356 | 2674.112 | 2784.684 | 2613.863 | 2736.588 | 2667.471 | 2773.743 |
| 25485 KDM3B     | 5592.862 | 0.018999 | 0.113998 | 0.166658 | 0.867639 | 0.905088 | 5299.978 | 6406.908 | 4963.348 | 5522.282 | 5465.428 | 5899.229 |
| 26077 TAF4      | 110.6747 | 0.018847 | 0.25263  | 0.074601 | 0.940532 | 0.958854 | 103.5385 | 123.7151 | 102.2725 | 111.6063 | 113.3729 | 109.5428 |
| 25540 ISCA1     | 2541.429 | 0.018667 | 0.117246 | 0.159209 | 0.873504 | 0.909245 | 2697.422 | 2150.781 | 2727.963 | 2531.232 | 2558.376 | 2582.797 |
| 25447 MTM1      | 2192.358 | 0.018552 | 0.107471 | 0.172621 | 0.86295  | 0.901541 | 2101.669 | 2388.905 | 2047.537 | 2176.324 | 2109.163 | 2330.547 |
| 25642 YTHDF1    | 2648.517 | 0.018544 | 0.129079 | 0.143664 | 0.885766 | 0.918343 | 2364.039 | 3121.342 | 2412.101 | 2520.071 | 2620.411 | 2853.137 |
| 26531 LOC119615 | 1.052576 | 0.018439 | 2.525322 | 0.007302 | 0.994174 | 0.996198 | 1.084173 | 0        | 2.087194 | 0        | 2.139111 | 1.004979 |
| 25571 B4GALT2   | 1699.366 | 0.018178 | 0.117163 | 0.155153 | 0.876701 | 0.911427 | 1741.724 | 1508.12  | 1820.729 | 1698.649 | 1597.916 | 1829.063 |
| 25519 SF3A3     | 5151.228 | 0.018124 | 0.111793 | 0.162121 | 0.871211 | 0.907604 | 4840.289 | 5883.582 | 4634.267 | 5035.678 | 5150.978 | 5362.57  |
| 25633 CIAO2A    | 2178.942 | 0.018119 | 0.125078 | 0.144862 | 0.88482  | 0.917682 | 2249.658 | 1827.808 | 2416.971 | 2165.163 | 2316.657 | 2097.392 |
| 26039 PLAG1     | 196.238  | 0.018062 | 0.225592 | 0.080066 | 0.936185 | 0.955742 | 217.3766 | 216.7751 | 149.5822 | 216.5163 | 188.2417 | 188.9361 |
| 25285 HAT1      | 3324.407 | 0.017986 | 0.089564 | 0.200816 | 0.840842 | 0.884055 | 3232.461 | 3451.431 | 3229.585 | 3249.977 | 3351.986 | 3431     |
| 25906 CARMIL2   | 302.7945 | 0.017882 | 0.172175 | 0.103858 | 0.917282 | 0.941288 | 306.8209 | 269.874  | 325.6023 | 330.3548 | 286.6408 | 297.4739 |
| 25542 STT3A     | 12072.85 | 0.017665 | 0.111347 | 0.158647 | 0.873947 | 0.909597 | 11241.79 | 13836.38 | 10921.59 | 11937.42 | 11660.29 | 12839.62 |
| 25763 SIX5      | 675.4297 | 0.017463 | 0.138881 | 0.125739 | 0.899939 | 0.928652 | 692.7864 | 589.5625 | 733.9966 | 678.5666 | 648.1505 | 709.5155 |
| 27836 KNG4      | 0.678777 | 0.01741  | 3.247468 | 0.005361 | 0.995723 | NA       | 0.542086 | 0        | 1.391463 | 0        | 2.139111 | 0        |
| 25918 BOLA1     | 431.5669 | 0.017385 | 0.171632 | 0.101292 | 0.919319 | 0.942978 | 442.8846 | 365.1237 | 480.0546 | 479.9073 | 372.2053 | 449.2258 |
| 25562 NAMPT     | 2465.061 | 0.017318 | 0.111101 | 0.155881 | 0.876127 | 0.911099 | 2328.261 | 2752.387 | 2269.476 | 2381.679 | 2588.324 | 2470.24  |
| 25449 KLHDC10   | 4386.985 | 0.017305 | 0.10039  | 0.172382 | 0.863137 | 0.901696 | 4330.186 | 4660.664 | 4097.162 | 4241.041 | 4216.187 | 4776.667 |
| 25760 ADAM12    | 1057.362 | 0.017217 | 0.136632 | 0.126009 | 0.899725 | 0.92854  | 939.4357 | 1232.771 | 982.3727 | 1044.635 | 1037.469 | 1107.487 |
| 25789 POLR2E    | 5193.522 | 0.017213 | 0.142423 | 0.120859 | 0.903803 | 0.931699 | 5796.53  | 4044.826 | 5650.73  | 5194.159 | 4710.322 | 5764.562 |
| 26693 TIFAB     | 0.694279 | 0.017177 | 3.224973 | 0.005326 | 0.99575  | NA       | 0.542086 | 0        |          |          |          |          |



|       |           |          |          |          |          |          |          |          |          |          |          |          |          |
|-------|-----------|----------|----------|----------|----------|----------|----------|----------|----------|----------|----------|----------|----------|
| 25700 | UBL7      | 911.9714 | 0.016971 | 0.125868 | 0.13483  | 0.892746 | 0.923489 | 974.6713 | 863.2684 | 885.666  | 926.3327 | 829.9749 | 991.9147 |
| 25671 | CDC23     | 3211.778 | 0.016949 | 0.121605 | 0.139374 | 0.889154 | 0.920776 | 2982.017 | 3730.064 | 2868.5   | 3245.513 | 3056.789 | 3387.786 |
| 26348 | LOC103245 | 31.3105  | 0.016743 | 0.48198  | 0.034738 | 0.972289 | 0.981005 | 21.14137 | 33.39212 | 38.26523 | 35.71403 | 34.22577 | 25.12449 |
| 25693 | BAZ2A     | 6907.168 | 0.016494 | 0.121666 | 0.135567 | 0.892164 | 0.923137 | 6290.912 | 8133.992 | 6180.877 | 6676.292 | 6787.398 | 7373.534 |
| 25544 | DGCR8     | 1979.627 | 0.016492 | 0.103958 | 0.158642 | 0.873951 | 0.909597 | 2019.814 | 1992.032 | 1899.347 | 1890.612 | 1910.226 | 2165.731 |
| 25662 | SAMM50    | 1418.398 | 0.016478 | 0.117326 | 0.140448 | 0.888306 | 0.920256 | 1424.061 | 1375.646 | 1438.772 | 1352.669 | 1311.275 | 1607.967 |
| 26397 | LOC103214 | 20.83538 | 0.016303 | 0.573121 | 0.028446 | 0.977306 | 0.984257 | 20.0572  | 22.9913  | 18.78475 | 31.24978 | 12.83466 | 19.09461 |
| 25872 | FGF12     | 593.9179 | 0.016254 | 0.151177 | 0.10752  | 0.914377 | 0.939576 | 561.0594 | 689.7389 | 519.7113 | 607.1385 | 598.951  | 586.908  |
| 26503 | CHSY3     | 3.128027 | 0.015952 | 1.472612 | 0.010833 | 0.991357 | 0.994424 | 1.626259 | 4.926706 | 2.782925 | 0        | 6.417332 | 3.014938 |
| 26182 | PRRG4     | 96.47582 | 0.01582  | 0.269497 | 0.058702 | 0.95319  | 0.967861 | 104.6227 | 85.94365 | 96.70666 | 107.1421 | 91.98176 | 92.45811 |
| 25766 | CFAP36    | 2301.178 | 0.015631 | 0.125376 | 0.124676 | 0.90078  | 0.929347 | 2029.029 | 2684.508 | 2150.506 | 2301.323 | 2408.639 | 2233.064 |
| 25733 | SUSD1     | 1275.377 | 0.015512 | 0.120005 | 0.129264 | 0.897149 | 0.926853 | 1182.29  | 1430.387 | 1193.179 | 1308.026 | 1264.214 | 1276.324 |
| 25877 | UCK1      | 804.7471 | 0.015449 | 0.14451  | 0.106908 | 0.914862 | 0.939893 | 836.4393 | 723.131  | 848.0965 | 761.1553 | 723.0194 | 936.6409 |
| 25589 | HES1      | 1663.125 | 0.015239 | 0.099596 | 0.153011 | 0.87839  | 0.912508 | 1721.666 | 1600.632 | 1642.622 | 1689.72  | 1608.611 | 1715.5   |
| 26366 | LOC103228 | 33.00542 | 0.015193 | 0.474858 | 0.031995 | 0.974476 | 0.982573 | 26.02015 | 31.74989 | 39.65669 | 35.71403 | 42.78221 | 22.10955 |
| 26344 | LOC119625 | 36.59385 | 0.014969 | 0.423004 | 0.035387 | 0.971771 | 0.980661 | 34.15144 | 31.74989 | 43.13534 | 35.71403 | 40.6431  | 34.1693  |
| 25718 | NOL9      | 3693.121 | 0.014949 | 0.113294 | 0.131944 | 0.895028 | 0.925201 | 3530.609 | 4168.541 | 3326.292 | 3571.403 | 3602.262 | 3959.619 |
| 25503 | METTL6    | 2278.875 | 0.014934 | 0.091278 | 0.163605 | 0.870042 | 0.906955 | 2272.426 | 2281.065 | 2244.429 | 2345.965 | 2312.379 | 2216.985 |
| 25705 | RNF114    | 3122.646 | 0.014742 | 0.110171 | 0.133814 | 0.89355  | 0.92409  | 3433.033 | 2745.27  | 3144.01  | 3138.371 | 3031.12  | 3244.074 |
| 26505 | LOC119625 | 2.7909   | 0.014693 | 1.422491 | 0.010329 | 0.991759 | 0.994698 | 3.252518 | 2.189647 | 2.782925 | 2.232127 | 4.278221 | 2.009959 |
| 25736 | ST13      | 15520.62 | 0.014692 | 0.113894 | 0.128997 | 0.89736  | 0.926957 | 14266.63 | 18136.3  | 13920.89 | 15479.8  | 15778.08 | 15542.01 |
| 25846 | RAD9A     | 608.6561 | 0.014563 | 0.129887 | 0.112122 | 0.910726 | 0.936766 | 576.7799 | 600.5108 | 641.4643 | 616.067  | 583.9772 | 633.1371 |
| 26049 | AP153     | 272.3629 | 0.014513 | 0.186381 | 0.077869 | 0.937932 | 0.957195 | 231.4709 | 296.6972 | 283.8584 | 263.391  | 299.4755 | 259.2847 |
| 25652 | FAM114A2  | 1803.448 | 0.014377 | 0.101536 | 0.141593 | 0.887402 | 0.919659 | 1767.202 | 1879.812 | 1736.546 | 1712.041 | 1908.087 | 1817.003 |
| 25956 | GAS2L3    | 693.9562 | 0.014303 | 0.151582 | 0.094359 | 0.924824 | 0.947236 | 615.8101 | 815.0962 | 639.3771 | 752.2268 | 658.8461 | 682.3811 |
| 25402 | RPN1      | 17965.75 | 0.014276 | 0.079062 | 0.180563 | 0.856711 | 0.896609 | 18363.18 | 17479.95 | 17789.85 | 18292.28 | 17435.89 | 18433.33 |
| 25761 | BET1L     | 1156.548 | 0.014113 | 0.11213  | 0.125867 | 0.899837 | 0.928608 | 1143.26  | 1143.543 | 1171.612 | 1113.831 | 1103.781 | 1263.259 |
| 26423 | LOC103245 | 46.35158 | 0.014112 | 0.57268  | 0.024642 | 0.980341 | 0.986383 | 26.56223 | 88.68071 | 22.2634  | 35.71403 | 72.72976 | 32.15934 |
| 25749 | LRRG47    | 1575.578 | 0.014053 | 0.109887 | 0.127887 | 0.898239 | 0.927402 | 1653.906 | 1489.508 | 1563.308 | 1640.613 | 1443.9   | 1662.236 |
| 25978 | LOC119625 | 20954.32 | 0.014041 | 0.153809 | 0.091291 | 0.927261 | 0.948928 | 20953.26 | 16791.86 | 24818.83 | 20836.91 | 17433.75 | 24891.33 |
| 25773 | SGSM2     | 3386.868 | 0.013855 | 0.112288 | 0.123389 | 0.901799 | 0.930211 | 3566.386 | 3130.101 | 3422.998 | 3316.941 | 3073.902 | 3810.882 |
| 26903 | LOC119625 | 0.679664 | 0.013789 | 3.246262 | 0.004248 | 0.996611 | NA       | 0        | 0.547412 | 1.391463 | 0        | 2.139111 | 0        |
| 26283 | LOC103215 | 83.62616 | 0.013781 | 0.319873 | 0.043083 | 0.965635 | 0.976731 | 65.05036 | 106.1979 | 77.92191 | 73.66019 | 100.5382 | 78.3884  |
| 26044 | YLFPM1    | 2520.305 | 0.013776 | 0.172446 | 0.079886 | 0.936328 | 0.955778 | 1975.905 | 3381.91  | 2166.507 | 2522.303 | 2547.681 | 2527.523 |
| 26268 | LOC103245 | 131.2089 | 0.013672 | 0.303942 | 0.044981 | 0.964122 | 0.975716 | 185.3935 | 88.68071 | 117.5786 | 122.767  | 141.1813 | 131.6523 |
| 25750 | SPG21     | 2135.297 | 0.01363  | 0.106849 | 0.127567 | 0.898492 | 0.927627 | 2235.564 | 2115.199 | 2030.84  | 2098.199 | 1989.373 | 2342.607 |
| 25874 | PAFAH1B3  | 1910.373 | 0.013317 | 0.124002 | 0.107392 | 0.914478 | 0.939607 | 2046.918 | 1614.865 | 2045.45  | 1946.415 | 1809.688 | 1998.904 |
| 26480 | LOC103228 | 7.801395 | 0.013171 | 0.928174 | 0.014191 | 0.988678 | 0.992598 | 9.757555 | 3.831883 | 9.740239 | 11.16063 | 4.278221 | 8.039836 |
| 25862 | PAPOLG    | 1710.658 | 0.012974 | 0.117965 | 0.109978 | 0.912427 | 0.937935 | 1607.828 | 1936.743 | 1565.396 | 1694.184 | 1692.037 | 1767.759 |
| 25853 | ZNF148    | 5489.644 | 0.012901 | 0.116292 | 0.110934 | 0.911668 | 0.937481 | 5056.04  | 6399.244 | 4940.388 | 5517.818 | 5405.533 | 5618.84  |
| 26407 | IMPG2     | 33.71709 | 0.012862 | 0.482949 | 0.026631 | 0.978754 | 0.985351 | 45.53526 | 21.89647 | 32.69937 | 31.24978 | 42.78221 | 28.13943 |
| 25692 | VPS39     | 3987.866 | 0.01272  | 0.093716 | 0.135725 | 0.892038 | 0.923044 | 3986.503 | 4095.735 | 3834.871 | 3790.152 | 3931.685 | 4288.247 |
| 26474 | LOC103218 | 8.883446 | 0.012693 | 0.847798 | 0.014971 | 0.988055 | 0.992212 | 8.131296 | 9.853413 | 9.044508 | 8.928508 | 4.278221 | 13.06473 |
| 26111 | TMEM131H  | 573.3417 | 0.012655 | 0.18307  | 0.069125 | 0.94489  | 0.962043 | 519.3187 | 723.6784 | 468.2272 | 533.4783 | 639.5941 | 555.7536 |
| 26215 | LOC119625 | 217.9111 | 0.01238  | 0.231094 | 0.053572 | 0.957276 | 0.970787 | 182.6831 | 281.3697 | 185.7603 | 212.0521 | 239.5804 | 206.0208 |
| 25878 | EVA1A     | 1311.141 | 0.012371 | 0.115822 | 0.106813 | 0.914938 | 0.939934 | 1385.031 | 1197.19  | 1337.196 | 1350.437 | 1217.154 | 1379.837 |
| 26115 | SNAPIN    | 1001.652 | 0.012182 | 0.177232 | 0.068732 | 0.945203 | 0.962177 | 1138.381 | 717.1095 | 1139.608 | 968.7431 | 947.626  | 1098.443 |
| 26012 | HID1      | 745.9242 | 0.012061 | 0.141614 | 0.085169 | 0.932127 | 0.952703 | 654.8403 | 836.4453 | 740.2582 | 734.3698 | 701.6283 | 808.0035 |
| 25757 | DCUN1D3   | 2003.356 | 0.012009 | 0.095035 | 0.126363 | 0.899444 | 0.928322 | 1992.709 | 2048.415 | 1946.656 | 2004.45  | 1946.591 | 2081.312 |
| 26074 | MED4      | 726.5973 | 0.01168  | 0.156126 | 0.074809 | 0.940367 | 0.958759 | 642.9144 | 879.1434 | 648.4216 | 703.12   | 759.3843 | 726.6002 |
| 26422 | LOC103245 | 31.63876 | 0.011516 | 0.468092 | 0.024602 | 0.980373 | 0.986383 | 36.31979 | 23.53871 | 34.09084 | 31.24978 | 38.50399 | 26.12947 |
| 26381 | LOC119625 | 59.36868 | 0.01147  | 0.372233 | 0.030814 | 0.975418 | 0.982961 | 55.8349  | 60.76271 | 61.92009 | 33.4819  | 74.86887 | 69.34358 |
| 25876 | MDN1      | 8465.692 | 0.011419 | 0.106455 | 0.107265 | 0.914579 | 0.939674 | 8369.814 | 8964.416 | 7970.994 | 7984.318 | 7921.127 | 9583.484 |
| 25888 | BBS4      | 1731.471 | 0.011356 | 0.107205 | 0.105931 | 0.915637 | 0.940289 | 1791.053 | 1651.541 | 1737.241 | 1705.345 | 1619.307 | 1884.337 |
| 26346 | LOC119625 | 95.08402 | 0.011284 | 0.321352 | 0.035115 | 0.971988 | 0.980806 | 74.26583 | 112.2194 | 95.3152  | 100.4457 | 121.9232 | 66.32864 |
| 26510 | LOC103216 | 4.56425  | 0.01126  | 1.160952 | 0.009699 | 0.992262 | 0.995039 | 3.794605 | 2.737059 | 6.957314 | 4.464254 | 6.417939 | 3.014938 |
| 25886 | ZNF629    | 2573.465 | 0.011085 | 0.104482 | 0.106096 | 0.915506 | 0.940191 | 2488.176 | 2779.757 | 2427.407 | 2506.679 | 2477.09  | 2761.684 |
| 25989 | GMEB2     | 1103.154 | 0.010976 | 0.122747 | 0.089419 | 0.928749 | 0.950048 | 1156.812 | 985.8887 | 1158.393 | 1060.26  | 1071.694 | 1185.876 |
| 25969 | REXO1     | 1117.247 | 0.010954 | 0.117834 | 0.092958 | 0.925937 | 0.947901 | 1137.839 | 1007.785 | 1194.571 | 1149.545 | 1078.112 | 1135.627 |
| 26052 | SPEN      | 2584.37  | 0.010932 | 0.141271 | 0.077384 | 0.938318 | 0.957515 | 2269.174 | 3167.872 | 2288.956 | 2426.322 | 2586.185 | 2767.713 |
| 25972 | RNF215    | 1062.913 | 0.010877 | 0.117356 | 0.092687 | 0.926152 | 0.948012 | 1119.408 | 997.3843 | 1064.469 | 1008.921 | 1039.608 | 1147.687 |
| 25915 | UFD1      | 2259.707 | 0.010821 | 0.105459 | 0.102606 | 0.918276 | 0.942016 | 2260.5   | 2448.026 | 2045.45  | 2265.609 | 2233.232 | 2305.423 |
| 26380 | LOC119615 | 86.51872 | 0.01009  | 0.327435 | 0.030814 | 0.975418 | 0.982961 | 102.9964 | 58.02565 | 96.70666 | 100.4457 | 85.56443 | 75.37346 |
| 26446 | LOC103235 | 40.18134 | 0.009962 | 0.475406 | 0.020955 | 0.983282 | 0.98845  | 29.81475 | 63.49977 | 26.43779 | 44.64254 | 38.50399 | 38.18922 |
| 26261 | STKLD1    | 162.5226 | 0.009866 | 0.212279 | 0.046475 | 0.962932 | 0.974812 | 175.0939 | 148.3486 | 162.1054 | 162.9453 | 166.8506 | 159.7917 |
| 26009 | TTC8      | 1426.969 | 0.009812 | 0.115008 | 0.085319 | 0.932008 | 0.952656 | 1343.832 | 1585.852 | 1336.5   | 1401.776 | 1456.734 | 1437.121 |
| 26108 | ZFP2      | 492.3795 | 0.009756 | 0.140577 | 0.0694   | 0.944671 | 0.961931 | 527.9921 | 481.7224 | 461.2699 | 484.3716 | 515.5257 | 483.3951 |
| 26080 | LOC103226 | 1193.541 | 0.009715 | 0.130832 | 0.074258 | 0.940805 | 0.959023 | 1087.425 | 1380.573 | 1099.951 | 1245.527 | 1150.842 | 1196.931 |
| 25838 | MCM6      | 6601.864 | 0.009693 | 0.085073 | 0.113935 | 0.909289 | 0.935591 | 6675.794 | 6618.756 | 6450.126 | 6511.114 | 6378.828 | 6976.567 |
| 26010 | CBLB      | 3966.212 | 0.00961  | 0.112871 | 0.085145 | 0.932146 | 0.952703 |          |          |          |          |          |          |



|       |           |          |          |          |          |          |          |          |          |          |          |          |          |
|-------|-----------|----------|----------|----------|----------|----------|----------|----------|----------|----------|----------|----------|----------|
| 26128 | GRAMD1C   | 524.0134 | 0.009177 | 0.137993 | 0.066507 | 0.946974 | 0.963506 | 538.2918 | 531.5369 | 499.5351 | 479.9073 | 539.0559 | 555.7536 |
| 26515 | LOC103218 | 8.031391 | 0.009173 | 0.992656 | 0.009241 | 0.992627 | 0.995247 | 13.01007 | 3.284471 | 7.653045 | 2.232127 | 14.97377 | 7.034856 |
| 26033 | VPS13B    | 5863.621 | 0.00916  | 0.11368  | 0.080577 | 0.935779 | 0.955584 | 5347.682 | 6772.579 | 5416.964 | 5747.727 | 5756.347 | 6140.425 |
| 26168 | PMVK      | 607.1407 | 0.00916  | 0.151685 | 0.060388 | 0.951847 | 0.96698  | 688.4497 | 540.2955 | 587.893  | 654.0132 | 539.0559 | 633.1371 |
| 26160 | SLC25A1   | 3460.065 | 0.008939 | 0.143677 | 0.062217 | 0.95039  | 0.965852 | 4042.338 | 2773.188 | 3537.098 | 3408.458 | 3123.102 | 3876.206 |
| 25883 | RTN4      | 15451.12 | 0.008858 | 0.083457 | 0.106144 | 0.915468 | 0.940191 | 15869.04 | 15411.28 | 14936.66 | 15044.54 | 15104.26 | 16340.97 |
| 26541 | HCRTR2    | 2.459098 | 0.008843 | 1.541612 | 0.005736 | 0.995423 | 0.997036 | 1.626259 | 2.737059 | 2.782925 | 4.464254 | 2.139111 | 1.004979 |
| 26171 | PER3      | 1170.592 | 0.008677 | 0.143908 | 0.060294 | 0.951921 | 0.96698  | 1022.375 | 1410.68  | 1069.339 | 1142.849 | 1157.259 | 1221.05  |
| 25993 | SLC5A3    | 2353.807 | 0.008648 | 0.0988   | 0.087526 | 0.930253 | 0.95144  | 2354.281 | 2419.013 | 2272.259 | 2328.108 | 2224.675 | 2524.508 |
| 26183 | FASN      | 23916.78 | 0.008538 | 0.145838 | 0.058541 | 0.953317 | 0.967954 | 26078.15 | 18439.02 | 27026.38 | 23649.39 | 21179.33 | 27128.42 |
| 25979 | MAT2A     | 9099.186 | 0.008529 | 0.09372  | 0.091002 | 0.927491 | 0.949052 | 8675.008 | 9495.405 | 9054.248 | 8805.741 | 8667.676 | 9897.038 |
| 26350 | LOC119625 | 123.1268 | 0.008509 | 0.247346 | 0.034399 | 0.972559 | 0.98122  | 108.4173 | 141.7797 | 117.5786 | 129.4634 | 121.9293 | 119.5926 |
| 26088 | COQ10B    | 2577.664 | 0.008435 | 0.115604 | 0.072962 | 0.941837 | 0.959779 | 2687.122 | 2219.755 | 2802.406 | 2558.018 | 2695.279 | 2503.404 |
| 26134 | SLC25A11  | 2557.435 | 0.008424 | 0.127726 | 0.065954 | 0.947415 | 0.963764 | 2727.779 | 2249.315 | 2679.957 | 2497.75  | 2265.318 | 2924.49  |
| 26493 | LOC103216 | 16.16115 | 0.008422 | 0.639742 | 0.013165 | 0.989496 | 0.992932 | 17.88885 | 13.6853  | 16.00182 | 20.08914 | 19.252   | 10.04979 |
| 26021 | PHTF1     | 2411.88  | 0.008413 | 0.101459 | 0.082924 | 0.933912 | 0.954155 | 2400.901 | 2591.448 | 2223.557 | 2381.679 | 2389.387 | 2484.309 |
| 26514 | CLDND2    | 8.865625 | 0.008365 | 0.900283 | 0.009291 | 0.992587 | 0.995245 | 6.505036 | 4.379295 | 16.00182 | 6.696381 | 8.556443 | 11.05477 |
| 26068 | CERS5     | 1845.222 | 0.008312 | 0.110215 | 0.075419 | 0.939881 | 0.958521 | 1993.252 | 1782.373 | 1749.069 | 1774.541 | 1771.184 | 2000.914 |
| 26232 | LOC103215 | 550.8504 | 0.008154 | 0.158663 | 0.05139  | 0.959015 | 0.971812 | 540.4601 | 641.0192 | 467.5315 | 522.3177 | 551.8906 | 581.8831 |
| 26203 | FZD4      | 495.5101 | 0.008086 | 0.144227 | 0.056063 | 0.955292 | 0.969219 | 497.6353 | 509.6404 | 476.576  | 531.2462 | 436.3786 | 521.5843 |
| 26463 | LOC119623 | 35.80981 | 0.008085 | 0.479994 | 0.016844 | 0.986561 | 0.991144 | 34.15144 | 33.93953 | 37.56949 | 33.4819  | 55.61688 | 20.09959 |
| 26243 | TMEM107   | 407.3907 | 0.008084 | 0.161753 | 0.049977 | 0.960141 | 0.972653 | 441.2583 | 366.2185 | 408.3943 | 404.015  | 455.6306 | 368.8275 |
| 26116 | VPS53     | 1447.335 | 0.007897 | 0.114822 | 0.068777 | 0.945167 | 0.962177 | 1401.835 | 1567.24  | 1365.721 | 1379.454 | 1398.978 | 1570.783 |
| 26174 | PSEN1     | 3628.704 | 0.007862 | 0.130824 | 0.060095 | 0.95208  | 0.967054 | 3263.902 | 4358.493 | 3236.542 | 3358.01  | 3476.055 | 3879.221 |
| 26186 | ZNF614    | 778.0965 | 0.007861 | 0.134771 | 0.058328 | 0.953487 | 0.968015 | 741.0321 | 866.5529 | 717.9948 | 752.2268 | 847.0878 | 743.6848 |
| 26026 | BLOC155   | 2140.597 | 0.007826 | 0.095846 | 0.081657 | 0.93492  | 0.955001 | 2099.501 | 2232.345 | 2073.975 | 2062.485 | 2190.449 | 2184.825 |
| 26297 | LOC119626 | 335.6145 | 0.007779 | 0.188277 | 0.041316 | 0.967044 | 0.977656 | 349.1036 | 312.5721 | 337.4297 | 397.3186 | 352.9533 | 264.3096 |
| 26069 | JPT2      | 4807.247 | 0.00773  | 0.102559 | 0.075375 | 0.939917 | 0.958521 | 5143.858 | 4513.958 | 4732.365 | 4622.735 | 4558.445 | 5272.122 |
| 26244 | CYP2R1    | 544.1557 | 0.007688 | 0.154301 | 0.049823 | 0.960264 | 0.972741 | 601.7159 | 472.4164 | 556.5851 | 486.6037 | 564.7252 | 582.8881 |
| 26304 | SGSM3     | 1219.308 | 0.007339 | 0.179886 | 0.040801 | 0.967455 | 0.97779  | 1434.903 | 866.5529 | 1350.415 | 1203.116 | 1093.086 | 1367.777 |
| 26025 | ATP6V1D   | 4993.773 | 0.007205 | 0.087621 | 0.082232 | 0.934462 | 0.95457  | 5071.218 | 4699.53  | 5172.763 | 4959.786 | 5101.779 | 4957.564 |
| 26188 | ADAP2     | 852.8432 | 0.007161 | 0.122954 | 0.058245 | 0.953554 | 0.968025 | 847.281  | 921.2941 | 784.785  | 848.2083 | 832.114  | 883.377  |
| 26347 | PNF54     | 198.702  | 0.007135 | 0.203795 | 0.035011 | 0.972071 | 0.980852 | 199.4878 | 196.5208 | 201.7621 | 169.6417 | 194.6591 | 230.1403 |
| 26166 | PPA2      | 2768.954 | 0.006953 | 0.115321 | 0.060295 | 0.95192  | 0.96698  | 2990.691 | 2366.461 | 2930.421 | 2718.731 | 2823.626 | 2783.793 |
| 26498 | LOC119627 | 18.81637 | 0.006921 | 0.595832 | 0.011615 | 0.990733 | 0.993986 | 16.26259 | 20.80165 | 19.48048 | 24.5534  | 10.69555 | 21.10457 |
| 26508 | TRNAS-UG  | 14.7675  | 0.006872 | 0.675331 | 0.010176 | 0.991881 | 0.994762 | 15.17842 | 10.94824 | 18.08902 | 8.928508 | 21.39111 | 14.06971 |
| 26124 | HMGNA4    | 2837.389 | 0.006845 | 0.101727 | 0.067286 | 0.946354 | 0.963054 | 2959.792 | 2697.098 | 2842.063 | 2689.713 | 2742.34  | 3093.327 |
| 26499 | LOC119628 | 23.11742 | 0.006751 | 0.589547 | 0.011451 | 0.990863 | 0.994079 | 25.47806 | 18.06459 | 25.04633 | 13.39276 | 40.6431  | 16.07967 |
| 26216 | CNOT11    | 1836.976 | 0.006665 | 0.124889 | 0.053364 | 0.957442 | 0.970881 | 1787.801 | 2110.82  | 1598.791 | 1906.236 | 1769.045 | 1849.162 |
| 26523 | LOC119629 | 12.41906 | 0.006033 | 0.761759 | 0.00792  | 0.993681 | 0.995972 | 13.01007 | 7.116354 | 16.69755 | 20.08914 | 8.556443 | 9.044815 |
| 26271 | NAA16     | 838.3793 | 0.005912 | 0.131685 | 0.044894 | 0.964192 | 0.975716 | 832.6447 | 933.8846 | 743.7368 | 810.2621 | 853.5052 | 856.2425 |
| 26328 | FAM98B    | 679.2983 | 0.00591  | 0.157998 | 0.037407 | 0.970161 | 0.979631 | 609.3051 | 814.0014 | 612.2436 | 618.2992 | 697.3501 | 724.5902 |
| 26293 | TMEM201   | 855.9417 | 0.005895 | 0.1408   | 0.041868 | 0.966604 | 0.977347 | 918.8364 | 740.6482 | 907.9294 | 805.7978 | 810.7229 | 951.7156 |
| 26213 | MAML1     | 3535.01  | 0.005885 | 0.109344 | 0.053819 | 0.957079 | 0.970673 | 3413.518 | 3764.551 | 3413.258 | 3383.905 | 3262.144 | 3972.684 |
| 26320 | EIF3J     | 1782.468 | 0.005839 | 0.152805 | 0.038821 | 0.96952  | 0.979265 | 1479.354 | 2247.125 | 1610.618 | 1754.452 | 1771.184 | 1832.078 |
| 26395 | NDUFB7    | 2418.921 | 0.005717 | 0.197898 | 0.02889  | 0.976952 | 0.983984 | 2735.368 | 1501.551 | 3006.255 | 2564.714 | 2252.484 | 2453.155 |
| 26187 | ARPC5     | 6779.713 | 0.00568  | 0.097547 | 0.058225 | 0.95357  | 0.968025 | 6836.793 | 6270.055 | 7187.601 | 6801.291 | 7228.055 | 6354.485 |
| 26413 | LOC119627 | 152.415  | 0.005607 | 0.220121 | 0.025473 | 0.979678 | 0.986057 | 155.5788 | 155.465  | 145.4079 | 169.6417 | 132.6249 | 155.7718 |
| 26330 | SMUG1     | 1019.095 | 0.005496 | 0.148769 | 0.036946 | 0.970528 | 0.979926 | 1166.028 | 828.7815 | 1059.599 | 948.654  | 1016.078 | 1095.428 |
| 26267 | PRUNE1    | 953.022  | 0.005494 | 0.121372 | 0.045264 | 0.963897 | 0.975566 | 947.567  | 1017.639 | 891.9276 | 937.4933 | 898.4265 | 1025.079 |
| 26457 | SSC5D     | 102.5957 | 0.005435 | 0.294536 | 0.018453 | 0.985277 | 0.990044 | 94.86511 | 121.5254 | 88.35788 | 109.3742 | 124.0684 | 77.38342 |
| 26345 | IFIT5     | 371.1524 | 0.005337 | 0.151657 | 0.035188 | 0.97193  | 0.980784 | 370.245  | 367.3133 | 375.6949 | 379.4616 | 342.2577 | 391.942  |
| 26306 | LOC103224 | 4310.172 | 0.005206 | 0.128535 | 0.040502 | 0.967693 | 0.977922 | 4723.741 | 3455.263 | 4728.886 | 4361.576 | 4261.108 | 4330.457 |
| 26269 | SPCS1     | 2845.174 | 0.005199 | 0.115728 | 0.044921 | 0.96417  | 0.975716 | 3038.394 | 2425.034 | 3058.435 | 2812.48  | 2834.322 | 2902.381 |
| 26341 | GMPPB     | 1433.754 | 0.005174 | 0.145025 | 0.035674 | 0.971543 | 0.980542 | 1612.707 | 1164.345 | 1520.869 | 1390.615 | 1324.11  | 1589.878 |
| 26373 | TSR3      | 541.636  | 0.005066 | 0.161407 | 0.031386 | 0.974962 | 0.982799 | 620.1468 | 462.0156 | 541.9747 | 562.496  | 481.2999 | 581.8831 |
| 26404 | FIP1L1    | 1387.041 | 0.004958 | 0.181028 | 0.027386 | 0.978152 | 0.984891 | 1112.903 | 1871.054 | 1168.133 | 1459.811 | 1396.839 | 1313.508 |
| 26246 | USO1      | 7964.351 | 0.004953 | 0.100205 | 0.049434 | 0.960574 | 0.972981 | 7598.967 | 8867.524 | 7387.276 | 7961.997 | 7743.581 | 8226.762 |
| 26387 | TSPAN33   | 387.3441 | 0.004906 | 0.16333  | 0.030036 | 0.976038 | 0.983362 | 416.3223 | 344.8694 | 402.1327 | 357.1403 | 376.4835 | 427.1163 |
| 26195 | PFN2      | 17167.4  | 0.004883 | 0.084914 | 0.057507 | 0.954141 | 0.968383 | 16541.77 | 17684.14 | 17183.17 | 17312.38 | 18028.42 | 16254.54 |
| 26280 | DYM       | 1949.692 | 0.004817 | 0.109515 | 0.043985 | 0.964916 | 0.976125 | 1907.06  | 2129.432 | 1804.727 | 1832.576 | 2004.347 | 2020.009 |
| 26202 | PPIA      | 37378.78 | 0.00478  | 0.085077 | 0.056181 | 0.955198 | 0.969192 | 35722.95 | 39199.61 | 37021.95 | 38691.69 | 38161.73 | 35474.77 |
| 26486 | LOC119626 | 53.27786 | 0.004755 | 0.358275 | 0.013271 | 0.989412 | 0.992922 | 61.25576 | 54.74118 | 43.13534 | 55.80317 | 53.47777 | 51.25395 |
| 26281 | ZNF263    | 1480.652 | 0.004598 | 0.104699 | 0.043918 | 0.96497  | 0.976132 | 1505.374 | 1497.719 | 1434.598 | 1374.99  | 1531.603 | 1539.629 |
| 26558 | LOC119615 | 5.994604 | 0.004476 | 1.032347 | 0.004336 | 0.99654  | 0.997548 | 4.878777 | 4.379295 | 8.348776 | 8.928508 | 6.417332 | 3.014938 |
| 26299 | IDH3A     | 3127.133 | 0.004358 | 0.10623  | 0.041028 | 0.967274 | 0.977787 | 2934.856 | 3472.781 | 2956.163 | 3129.442 | 3270.7   | 2998.859 |
| 26292 | NCBP2     | 7145.711 | 0.004337 | 0.103617 | 0.041858 | 0.966612 | 0.977347 | 6690.972 | 7965.937 | 6743.028 | 7294.591 | 7448.383 | 6731.352 |
| 26483 | LOC103215 | 80.3026  | 0.004322 | 0.309316 | 0.013974 | 0.98885  | 0.992659 | 70.47123 | 98.53413 | 71.66033 | 89.28508 | 68.45154 | 83.4133  |
| 26540 | GNAT2     | 12.78721 | 0.00414  | 0.70887  | 0.005841 | 0.99534  | 0.997027 | 13.55216 | 14.23271 | 11.1317  | 11.16063 | 8.556443 | 18.08963 |
| 26353 |           |          |          |          |          |          |          |          |          |          |          |          |          |



|       |           |          |           |          |          |          |          |          |          |          |          |          |          |
|-------|-----------|----------|-----------|----------|----------|----------|----------|----------|----------|----------|----------|----------|----------|
| 26412 | MIER2     | 967.6258 | 0.003555  | 0.138419 | 0.025684 | 0.979509 | 0.985925 | 1044.6   | 838.0875 | 1019.246 | 1020.082 | 855.6443 | 1028.094 |
| 26352 | VAPB      | 4694.469 | 0.003553  | 0.103578 | 0.034305 | 0.972634 | 0.981234 | 4549.731 | 5244.205 | 4271.791 | 4709.788 | 4656.844 | 4734.458 |
| 26364 | RRM2B     | 4911.39  | 0.003508  | 0.107744 | 0.032558 | 0.974027 | 0.982192 | 5260.406 | 4255.032 | 5199.896 | 5008.893 | 4924.233 | 4819.882 |
| 26409 | ZNF382    | 884.3006 | 0.003311  | 0.126486 | 0.026178 | 0.979115 | 0.985641 | 848.3652 | 980.4146 | 823.0502 | 848.2083 | 879.1745 | 926.5911 |
| 26511 | LOC103232 | 59.58062 | 0.003292  | 0.339737 | 0.009689 | 0.992269 | 0.995039 | 53.66655 | 67.33165 | 57.04997 | 53.57105 | 70.59065 | 55.27387 |
| 26405 | EFCAB14   | 4555.529 | 0.003181  | 0.11763  | 0.027046 | 0.978423 | 0.985093 | 4221.769 | 5203.697 | 4230.742 | 4499.968 | 4203.352 | 4973.643 |
| 26444 | TRIM33    | 2885.766 | 0.003169  | 0.147796 | 0.02144  | 0.982894 | 0.988135 | 2504.981 | 3643.026 | 2501.154 | 2814.712 | 2808.652 | 3042.073 |
| 26528 | LAMC2     | 42.23302 | 0.003078  | 0.412151 | 0.007469 | 0.99404  | 0.996176 | 43.36691 | 44.88777 | 36.87376 | 44.64254 | 53.47777 | 30.14938 |
| 26418 | RUNDC1    | 786.4064 | 0.003034  | 0.121354 | 0.024998 | 0.980057 | 0.986258 | 789.2778 | 796.4842 | 773.6533 | 808.03   | 720.8803 | 830.113  |
| 26437 | ZNF107    | 1539.167 | 0.002999  | 0.131897 | 0.022737 | 0.98186  | 0.987357 | 1536.273 | 1776.899 | 1297.539 | 1540.168 | 1578.664 | 1505.459 |
| 26543 | LOC103216 | 32.27013 | 0.002904  | 0.512557 | 0.005665 | 0.99548  | 0.997055 | 17.34676 | 34.48694 | 44.52681 | 40.17829 | 29.94755 | 27.13445 |
| 26439 | CDK5RAP1  | 1686.212 | 0.002841  | 0.126476 | 0.02246  | 0.982081 | 0.987504 | 1860.44  | 1476.917 | 1720.544 | 1703.113 | 1525.186 | 1831.073 |
| 26436 | NDUFA1    | 3170.621 | 0.002618  | 0.114244 | 0.022914 | 0.981719 | 0.987258 | 3263.902 | 2801.654 | 3433.434 | 3196.406 | 3411.882 | 2916.45  |
| 26560 | LOC103238 | 14.13414 | 0.002598  | 0.65838  | 0.003947 | 0.996851 | 0.997677 | 16.26259 | 11.49565 | 14.61036 | 13.39276 | 14.97377 | 14.06971 |
| 26431 | SURF4     | 12979.43 | 0.002277  | 0.09695  | 0.023485 | 0.981263 | 0.987011 | 13386.28 | 12788.09 | 12742.32 | 12535.63 | 12023.94 | 14400.35 |
| 26496 | LOC103224 | 282.3038 | 0.002255  | 0.186154 | 0.012112 | 0.990337 | 0.993663 | 303.5684 | 260.0206 | 283.1627 | 234.3733 | 327.2839 | 285.4142 |
| 26491 | ZNF490    | 313.96   | 0.0022    | 0.165602 | 0.013284 | 0.989401 | 0.992922 | 333.3831 | 303.8136 | 304.0346 | 285.7123 | 342.2577 | 314.5586 |
| 26530 | LOC103214 | 90.84469 | 0.001981  | 0.270186 | 0.007332 | 0.99415  | 0.996198 | 88.36008 | 95.24966 | 89.05362 | 84.82083 | 94.12087 | 93.46309 |
| 26489 | PDCD4     | 1940.845 | 0.00198   | 0.147462 | 0.013428 | 0.989286 | 0.992922 | 1717.872 | 2422.297 | 1679.496 | 1861.594 | 1933.756 | 2030.059 |
| 26482 | SEC22A    | 773.9905 | 0.00198   | 0.141497 | 0.01399  | 0.988838 | 0.992659 | 836.4393 | 651.9675 | 832.7905 | 790.173  | 748.6887 | 783.884  |
| 26572 | LOC119627 | 9.514938 | 0.001979  | 0.840593 | 0.002354 | 0.998122 | 0.99861  | 10.84173 | 4.926706 | 12.52316 | 8.928508 | 12.83466 | 7.034856 |
| 26470 | MOB3C     | 735.3619 | 0.00197   | 0.129697 | 0.015191 | 0.98788  | 0.992172 | 785.4831 | 663.4631 | 756.9557 | 747.7625 | 703.7674 | 754.7396 |
| 26565 | LOC103233 | 22.03051 | 0.00191   | 0.541824 | 0.003525 | 0.997187 | 0.997901 | 20.0572  | 21.89647 | 24.3506  | 26.78552 | 14.97377 | 24.11951 |
| 26485 | TRMT2B    | 524.3747 | 0.001901  | 0.13395  | 0.013628 | 0.989127 | 0.992862 | 560.5173 | 498.1448 | 516.2327 | 511.1571 | 498.4128 | 561.7835 |
| 26533 | LOC119627 | 90.48696 | 0.001817  | 0.269435 | 0.006744 | 0.994619 | 0.996518 | 87.27591 | 91.96518 | 91.83654 | 89.28508 | 94.12087 | 88.43819 |
| 26467 | WSCD1     | 964.725  | 0.001813  | 0.115593 | 0.015687 | 0.987484 | 0.991886 | 950.8195 | 963.9922 | 981.677  | 968.7431 | 892.0091 | 1031.109 |
| 26478 | DMPK      | 701.6986 | 0.0018    | 0.124577 | 0.014448 | 0.988473 | 0.992467 | 690.618  | 729.1525 | 686.6869 | 705.3521 | 656.707  | 741.6748 |
| 26494 | SNX25     | 943.7079 | 0.001614  | 0.129172 | 0.012492 | 0.990033 | 0.993434 | 961.1191 | 1039.535 | 830.0075 | 906.2436 | 945.4869 | 979.855  |
| 26564 | LOC103214 | 37.96161 | 0.001608  | 0.433457 | 0.00371  | 0.99704  | 0.997828 | 33.60935 | 34.48694 | 45.22254 | 51.33892 | 29.94755 | 33.16432 |
| 26500 | ZNF367    | 1163.501 | 0.001542  | 0.138568 | 0.011131 | 0.991119 | 0.99426  | 1023.459 | 1383.857 | 1081.167 | 1145.081 | 1178.65  | 1168.791 |
| 26516 | UXS1      | 1018.504 | 0.00124   | 0.139221 | 0.008908 | 0.992893 | 0.995476 | 939.4357 | 1198.832 | 916.9739 | 959.8146 | 1041.747 | 1054.223 |
| 26517 | MBTPS2    | 816.4011 | 0.001101  | 0.125937 | 0.008746 | 0.993022 | 0.995568 | 765.968  | 891.1864 | 792.438  | 767.8517 | 842.8096 | 838.1529 |
| 26509 | DLG5      | 9338.537 | 0.001069  | 0.109596 | 0.009752 | 0.992219 | 0.995039 | 8527.561 | 10234.96 | 9249.053 | 9328.059 | 8438.792 | 10252.8  |
| 26529 | LOC103234 | 4837.667 | 0.001022  | 0.138171 | 0.007397 | 0.994098 | 0.996196 | 5558.554 | 3817.103 | 5135.889 | 4738.806 | 4547.749 | 5227.903 |
| 26507 | NDUFB11   | 2908.561 | 0.000941  | 0.090476 | 0.010397 | 0.991704 | 0.994698 | 2952.744 | 2789.063 | 2983.296 | 2930.783 | 2825.765 | 2969.714 |
| 26581 | LOC119625 | 8.177972 | 0.000777  | 0.9107   | 0.000853 | 0.99932  | 0.999478 | 9.757555 | 10.40082 | 4.87012  | 6.696381 | 4.278221 | 13.06473 |
| 26544 | CLUAP1    | 1297.414 | 0.00075   | 0.135058 | 0.005555 | 0.995568 | 0.997106 | 1205.058 | 1523.994 | 1162.567 | 1352.669 | 1208.598 | 1331.598 |
| 26567 | LYSMD2    | 225.1262 | 0.000711  | 0.207471 | 0.003429 | 0.997264 | 0.99794  | 221.1712 | 196.5208 | 259.5078 | 187.4987 | 243.8586 | 242.2001 |
| 26580 | DTX1      | 12.10235 | 0.000615  | 0.730131 | 0.000843 | 0.999328 | 0.999478 | 11.9259  | 12.59047 | 12.52316 | 8.928508 | 8.556443 | 18.08963 |
| 26556 | BRPF1     | 1429.944 | 0.00053   | 0.122548 | 0.004325 | 0.996549 | 0.997548 | 1335.701 | 1586.947 | 1371.287 | 1392.847 | 1324.11  | 1568.773 |
| 26568 | ASRGL1    | 4087.211 | 0.000308  | 0.09774  | 0.003155 | 0.997482 | 0.998121 | 4052.096 | 4349.187 | 3864.092 | 4026.757 | 3867.512 | 4363.621 |
| 26575 | RNF7      | 2194.981 | 0.000303  | 0.160535 | 0.001888 | 0.998493 | 0.998894 | 2508.234 | 1594.063 | 2483.761 | 2095.967 | 2207.562 | 2280.298 |
| 26573 | WVOX      | 480.2771 | 0.00028   | 0.142237 | 0.001966 | 0.998431 | 0.998882 | 475.9518 | 494.3129 | 470.3144 | 437.4969 | 526.2212 | 477.3652 |
| 26577 | ZNF619    | 445.5972 | 0.00019   | 0.161992 | 0.00117  | 0.999066 | 0.99933  | 442.3425 | 502.524  | 388.9138 | 444.1933 | 485.5781 | 410.0316 |
| 26584 | LOC119624 | 86.74499 | 0.000108  | 0.314045 | 0.000344 | 0.999725 | 0.999772 | 92.69677 | 76.09024 | 91.83654 | 58.0353  | 113.3729 | 88.43819 |
| 26585 | SEPTIN10  | 6698.169 | -2.97E-05 | 0.096317 | -0.00031 | 0.999754 | 0.999772 | 6337.532 | 7261.418 | 6490.478 | 6796.827 | 6988.475 | 6314.286 |
| 26582 | SRRM2     | 7839.947 | -6.30E-05 | 0.134379 | -0.00047 | 0.999626 | 0.999739 | 6644.353 | 9625.142 | 7253     | 7540.125 | 7705.077 | 8271.986 |
| 26576 | G6PD      | 61834.31 | -0.00012  | 0.092873 | -0.00134 | 0.998927 | 0.999266 | 63285.33 | 60756.14 | 61478.3  | 60905.82 | 56793.39 | 67786.87 |
| 26578 | DCAF15    | 942.2619 | -0.00016  | 0.132599 | -0.00119 | 0.999048 | 0.99933  | 998.5231 | 818.9281 | 1012.985 | 921.8684 | 896.2874 | 1004.979 |
| 26570 | UBAP2     | 2797.789 | -0.00043  | 0.156401 | -0.00273 | 0.997821 | 0.998385 | 2304.951 | 3608.539 | 2481.674 | 2861.587 | 2639.663 | 2900.321 |
| 26559 | DCAF7     | 4866.401 | -0.0005   | 0.115569 | -0.00431 | 0.99656  | 0.997548 | 4586.593 | 5502.036 | 4518.775 | 4712.02  | 4511.384 | 5367.595 |
| 26553 | ORAI3     | 1479.926 | -0.0005   | 0.108388 | -0.00462 | 0.996316 | 0.997516 | 1501.037 | 1497.719 | 1447.817 | 1428.561 | 1390.422 | 1613.997 |
| 26547 | LOC119623 | 1418.863 | -0.00056  | 0.103429 | -0.00539 | 0.995703 | 0.997129 | 1368.768 | 1487.865 | 1403.29  | 1379.454 | 1407.535 | 1466.265 |
| 26552 | LOC103226 | 7433.65  | -0.00058  | 0.117958 | -0.00493 | 0.996064 | 0.997302 | 8016.373 | 6693.752 | 7603.648 | 7145.038 | 6659.052 | 8484.037 |
| 26563 | ZNF420    | 415.6356 | -0.00064  | 0.158577 | -0.00406 | 0.996763 | 0.997677 | 400.0597 | 455.4466 | 394.4797 | 419.6399 | 367.927  | 456.2607 |
| 26583 | LOC119618 | 1.374629 | -0.00065  | 2.287939 | -0.00029 | 0.999772 | 0.999772 | 1.084173 | 2.189647 | 0.695731 | 0        | 4.278221 | 0        |
| 26539 | SRSF6     | 8690.782 | -0.00067  | 0.108367 | -0.00617 | 0.99508  | 0.996805 | 8052.151 | 9980.412 | 8046.829 | 8732.081 | 8428.096 | 8905.123 |
| 26571 | LOC103233 | 281.935  | -0.00068  | 0.279562 | -0.00242 | 0.998072 | 0.998598 | 200.572  | 424.7916 | 218.4597 | 294.6408 | 323.0057 | 230.1403 |
| 26555 | SLC49A4   | 1180.658 | -0.00068  | 0.158209 | -0.0043  | 0.996572 | 0.997548 | 1032.675 | 1488.96  | 1021.334 | 1216.509 | 1114.477 | 1209.995 |
| 26557 | MITD1     | 901.2211 | -0.00071  | 0.163079 | -0.00434 | 0.996534 | 0.997548 | 760.5472 | 1105.772 | 834.1819 | 939.7255 | 971.1562 | 795.9437 |
| 26546 | SCRN2     | 1051.666 | -0.0008   | 0.148028 | -0.00542 | 0.995674 | 0.997129 | 1172.533 | 868.1951 | 1119.432 | 1029.011 | 954.0434 | 1166.781 |
| 26527 | HDAC6     | 2549.218 | -0.00083  | 0.107142 | -0.00772 | 0.993843 | 0.996016 | 2546.722 | 2555.318 | 2555.421 | 2517.839 | 2290.988 | 2829.017 |
| 26532 | LOC103248 | 3021.626 | -0.0009   | 0.126669 | -0.00714 | 0.994306 | 0.996292 | 2683.328 | 3603.065 | 2782.23  | 3015.604 | 2939.138 | 3106.392 |
| 26551 | ACTA1     | 162.8888 | -0.00106  | 0.207503 | -0.00513 | 0.995909 | 0.997217 | 168.5889 | 157.6546 | 162.8011 | 165.1774 | 158.2942 | 164.8166 |
| 26579 | LOC119626 | 4.255393 | -0.00118  | 1.257406 | -0.00094 | 0.999251 | 0.999476 | 3.252518 | 1.642235 | 7.653045 | 6.696381 | 4.278221 | 2.009959 |
| 26512 | RXRA      | 2755.121 | -0.00126  | 0.131463 | -0.00962 | 0.992323 | 0.995056 | 3016.169 | 2286.539 | 2970.077 | 2819.176 | 2477.09  | 2961.674 |
| 26504 | ZNF449    | 1393.951 | -0.00134  | 0.124344 | -0.01076 | 0.991415 | 0.994445 | 1274.445 | 1591.326 | 1318.411 | 1316.955 | 1454.595 | 1407.976 |
| 26519 | PBDC1     | 836.9597 | -0.00142  | 0.168618 | -0.00842 | 0.993286 | 0.995766 | 700.9177 | 1065.263 | 745.824  | 799.1015 | 868.4789 | 842.1728 |
| 26465 | LOC103230 | 9347.999 | -0.00143  | 0.089256 | -0.01602 | 0.987218 | 0.991694 | 9173.186 | 10007.78 | 8880.315 | 9089.221 | 9232.402 | 9705.087 |
| 26574 | LOC119615 | 11.20608 | -0.00146  | 0.       |          |          |          |          |          |          |          |          |          |



|       |           |          |          |          |          |          |          |          |          |          |            |          |          |
|-------|-----------|----------|----------|----------|----------|----------|----------|----------|----------|----------|------------|----------|----------|
| 26469 | FARS2     | 1406.667 | -0.00186 | 0.121055 | -0.01537 | 0.987738 | 0.992067 | 1571.508 | 1245.362 | 1407.465 | 1370.526   | 1398.978 | 1446.165 |
| 26464 | PLEKHA8   | 1530.165 | -0.00187 | 0.111198 | -0.01674 | 0.986643 | 0.991154 | 1499.953 | 1662.49  | 1434.598 | 1446.418   | 1514.49  | 1623.042 |
| 26549 | LOC119624 | 49.18841 | -0.00188 | 0.36059  | -0.00522 | 0.995834 | 0.997185 | 53.66655 | 47.07742 | 46.614   | 51.33892   | 49.19955 | 47.23404 |
| 26475 | UMAD1     | 751.033  | -0.00189 | 0.126518 | -0.01495 | 0.988072 | 0.992212 | 703.6281 | 793.1997 | 754.1728 | 781.2444   | 776.4972 | 697.4558 |
| 26537 | LOC10324  | 71.90803 | -0.00202 | 0.311412 | -0.0065  | 0.994815 | 0.996614 | 66.13454 | 83.2066  | 66.09448 | 80.35657   | 66.31243 | 69.34358 |
| 26562 | LOC10324  | 25.16876 | -0.00208 | 0.517093 | -0.00402 | 0.99679  | 0.997677 | 22.22554 | 31.74989 | 22.2634  | 20.08914   | 23.53022 | 31.15436 |
| 26461 | FBXL2     | 755.5788 | -0.00209 | 0.122268 | -0.0171  | 0.986356 | 0.990978 | 777.3519 | 722.5836 | 770.8704 | 767.8517   | 705.9065 | 788.9089 |
| 26455 | AMPD2     | 2719.656 | -0.00214 | 0.109759 | -0.01947 | 0.984469 | 0.989307 | 2800.96  | 2579.404 | 2792.666 | 2633.91    | 2474.951 | 3036.043 |
| 26462 | FKBP2     | 2316.382 | -0.00219 | 0.130405 | -0.0168  | 0.986596 | 0.991144 | 2019.814 | 2766.619 | 2168.595 | 2330.341   | 2248.205 | 2364.717 |
| 26490 | SUGP1     | 1066.312 | -0.0022  | 0.163985 | -0.01341 | 0.989301 | 0.992922 | 900.9475 | 1362.508 | 938.5416 | 1062.492   | 1028.912 | 1104.472 |
| 26429 | IP6K2     | 2205.23  | -0.00225 | 0.095597 | -0.02356 | 0.981203 | 0.986995 | 2211.712 | 2261.906 | 2150.506 | 2220.966   | 2089.911 | 2296.378 |
| 26459 | MMAB      | 664.8354 | -0.00229 | 0.128844 | -0.01774 | 0.985847 | 0.990541 | 702.0018 | 650.3252 | 642.8558 | 624.9956   | 716.6021 | 652.2317 |
| 26434 | ADIPOR2   | 3492.963 | -0.00237 | 0.103038 | -0.02299 | 0.981655 | 0.987258 | 3550.666 | 3637.004 | 3306.811 | 3223.191   | 3416.16  | 3823.947 |
| 26566 | CABP5     | 14.80218 | -0.00239 | 0.677077 | -0.00354 | 0.997178 | 0.997901 | 15.7205  | 15.32753 | 12.52316 | 20.08914   | 17.11289 | 8.039836 |
| 26536 | TRNAT-AG  | 47.10501 | -0.00243 | 0.36953  | -0.00657 | 0.994759 | 0.996596 | 43.909   | 52.55153 | 45.22254 | 44.64254   | 47.06043 | 49.24399 |
| 26443 | KLHL22    | 1261.437 | -0.00259 | 0.120408 | -0.02151 | 0.982838 | 0.988116 | 1373.105 | 1152.849 | 1266.231 | 1223.206   | 1191.485 | 1361.747 |
| 26472 | LOC119624 | 333.0685 | -0.00261 | 0.175125 | -0.01491 | 0.988107 | 0.992212 | 328.5043 | 366.7659 | 307.5133 | 339.2833   | 284.5017 | 371.8424 |
| 26417 | TPPAL     | 1744.607 | -0.00277 | 0.110747 | -0.02499 | 0.980062 | 0.986258 | 1901.097 | 1620.886 | 1720.544 | 1725.434   | 1653.533 | 1846.197 |
| 26484 | LOC119624 | 194.754  | -0.00281 | 0.203424 | -0.01381 | 0.988982 | 0.992753 | 182.141  | 221.7018 | 180.1944 | 200.8914   | 194.6591 | 188.9361 |
| 26521 | LOC119615 | 56.49754 | -0.00286 | 0.347538 | -0.00824 | 0.993428 | 0.995814 | 53.66655 | 56.93083 | 58.44144 | 49.10679   | 70.59065 | 50.24897 |
| 26396 | BTFL4     | 2586.939 | -0.00292 | 0.102641 | -0.02841 | 0.977334 | 0.984257 | 2511.486 | 2564.077 | 2686.219 | 2720.963   | 2695.279 | 2343.612 |
| 26535 | ALKBH7    | 539.4068 | -0.00299 | 0.444717 | -0.00671 | 0.994644 | 0.996518 | 684.6551 | 252.3568 | 683.2082 | 540.1747   | 511.2474 | 564.7985 |
| 26545 | LOC10323  | 25.53114 | -0.003   | 0.548099 | -0.00547 | 0.995636 | 0.997129 | 22.76763 | 31.20247 | 21.56767 | 40.17829   | 21.39111 | 16.07967 |
| 26569 | DDX25     | 5.965374 | -0.00311 | 1.053459 | -0.00295 | 0.997643 | 0.998244 | 3.794605 | 5.474118 | 8.348776 | 4.464254   | 10.69555 | 3.014938 |
| 26525 | SPTB      | 62.74894 | -0.00315 | 0.401743 | -0.00785 | 0.993739 | 0.995987 | 60.71367 | 59.12048 | 66.09448 | 78.12444   | 81.28621 | 31.15436 |
| 26408 | PCCB      | 4736.529 | -0.00318 | 0.121093 | -0.02625 | 0.97906  | 0.985622 | 5300.521 | 3979.684 | 4948.737 | 4656.217   | 4507.106 | 5026.907 |
| 26362 | MOV10     | 6087.444 | -0.00327 | 0.099633 | -0.03287 | 0.97378  | 0.982017 | 6310.97  | 5814.608 | 6166.267 | 5772.28    | 5739.234 | 6721.303 |
| 26438 | ESS2      | 739.192  | -0.00332 | 0.147504 | -0.02253 | 0.982029 | 0.987489 | 796.3249 | 649.2304 | 779.2191 | 640.6204   | 748.6887 | 821.0682 |
| 26518 | LOC119618 | 53.20713 | -0.00339 | 0.40358  | -0.00841 | 0.993294 | 0.995766 | 57.46116 | 45.43518 | 56.35424 | 33.4819    | 81.28621 | 45.22408 |
| 26336 | CORO1C    | 11842.56 | -0.0034  | 0.09441  | -0.03599 | 0.971288 | 0.980434 | 11277.56 | 12857.06 | 11439.91 | 11640.54   | 11305.2  | 12535.11 |
| 26349 | YWHAB     | 13312.24 | -0.00352 | 0.10136  | -0.03473 | 0.972297 | 0.981005 | 12467.99 | 14967.33 | 12553.08 | 13078.03   | 12920.23 | 13886.81 |
| 26487 | TMEM60    | 112.9971 | -0.00355 | 0.266823 | -0.01329 | 0.989393 | 0.992922 | 111.1277 | 99.08154 | 130.1018 | 127.2312   | 89.84265 | 120.5975 |
| 26522 | LOC103216 | 46.43032 | -0.00361 | 0.439567 | -0.0082  | 0.993454 | 0.995814 | 37.94605 | 39.41365 | 60.52863 | 55.80317   | 57.75599 | 27.13445 |
| 26391 | ABHD17B   | 918.8907 | -0.00373 | 0.127643 | -0.02925 | 0.976668 | 0.983847 | 937.8094 | 870.9322 | 956.6306 | 924.1006   | 812.8621 | 1011.009 |
| 26415 | MPG       | 870.112  | -0.00384 | 0.151722 | -0.02533 | 0.979792 | 0.986098 | 954.072  | 700.6871 | 957.3264 | 926.3327   | 864.2007 | 818.0533 |
| 26411 | TMEM147   | 2034.919 | -0.00403 | 0.155155 | -0.02595 | 0.979301 | 0.985753 | 2359.16  | 1584.757 | 2174.161 | 1948.647   | 1835.357 | 2307.433 |
| 26285 | BIRC2     | 4009.348 | -0.00412 | 0.096103 | -0.04282 | 0.965844 | 0.976831 | 3795.147 | 4378.747 | 3870.354 | 4022.293   | 4010.833 | 3978.714 |
| 26550 | TRNAG-CC  | 11.21484 | -0.00412 | 0.809474 | -0.00509 | 0.995942 | 0.997217 | 15.7205  | 10.40082 | 6.957314 | 8.928508   | 19.252   | 6.029877 |
| 26274 | AGPAT5    | 3470.545 | -0.00412 | 0.092476 | -0.04458 | 0.964442 | 0.975858 | 3618.427 | 3262.574 | 3548.23  | 3462.029   | 3373.378 | 3558.632 |
| 26313 | FBRS      | 1487.121 | -0.00422 | 0.107928 | -0.03906 | 0.968846 | 0.978861 | 1393.704 | 1581.473 | 1493.735 | 1537.935   | 1405.396 | 1510.484 |
| 26333 | ANKFY1    | 3703.028 | -0.00423 | 0.115508 | -0.03662 | 0.970787 | 0.980077 | 4004.934 | 3555.44  | 3573.276 | 3495.511   | 3369.099 | 4219.909 |
| 26315 | NFE2L2    | 7455.649 | -0.00445 | 0.115443 | -0.03856 | 0.969244 | 0.979178 | 6876.366 | 8735.598 | 6791.034 | 7377.18    | 7234.472 | 7719.247 |
| 26270 | PEX1      | 3388.215 | -0.00463 | 0.10278  | -0.04502 | 0.964092 | 0.975716 | 3353.346 | 3698.862 | 3132.183 | 3238.816   | 3343.43  | 3562.652 |
| 26416 | LRSAM1    | 698.1914 | -0.00483 | 0.191376 | -0.02524 | 0.979861 | 0.986129 | 850.5335 | 532.0843 | 720.082  | 620.5313   | 626.7594 | 839.1579 |
| 26200 | AZ12      | 3322.406 | -0.00501 | 0.088984 | -0.05628 | 0.955121 | 0.969192 | 3316.484 | 3368.772 | 3304.028 | 3176.317   | 3300.648 | 3468.184 |
| 26354 | MSANTD4   | 1091.852 | -0.00515 | 0.153245 | -0.03358 | 0.973211 | 0.981742 | 941.604  | 1352.107 | 985.8514 | 1091.51    | 1135.868 | 1044.174 |
| 26524 | LOC103218 | 14.53499 | -0.00515 | 0.650684 | -0.00791 | 0.993687 | 0.995972 | 12.46799 | 13.6853  | 17.39328 | 15.62489   | 14.97377 | 13.06473 |
| 26210 | NAPG      | 1775.37  | -0.00522 | 0.095942 | -0.05443 | 0.956595 | 0.970282 | 1760.697 | 1820.692 | 1753.243 | 1830.344   | 1730.541 | 1756.704 |
| 26289 | SEC11A    | 3372.709 | -0.00553 | 0.130179 | -0.04249 | 0.966107 | 0.977013 | 3009.121 | 4083.145 | 3043.129 | 3435.243   | 3405.464 | 3260.153 |
| 26220 | CUNH18or  | 1940.287 | -0.00571 | 0.107953 | -0.05287 | 0.957838 | 0.971171 | 1927.659 | 1931.816 | 1965.441 | 2035.7     | 2053.546 | 1727.56  |
| 26229 | HEATR5B   | 2355.583 | -0.00575 | 0.111507 | -0.05161 | 0.95884  | 0.971812 | 2349.944 | 2552.581 | 2183.901 | 2272.305   | 2199.006 | 2575.762 |
| 26454 | LOC119628 | 80.83736 | -0.00592 | 0.30007  | -0.01974 | 0.984253 | 0.989127 | 77.51835 | 70.61612 | 93.92374 | 87.05295   | 85.56443 | 70.34856 |
| 26365 | CAPN10    | 761.6421 | -0.00593 | 0.185512 | -0.03199 | 0.974479 | 0.982573 | 916.126  | 548.5066 | 827.2246 | 756.691    | 695.211  | 826.0931 |
| 26339 | HSDL1     | 498.1724 | -0.006   | 0.167403 | -0.03583 | 0.971416 | 0.980494 | 565.9382 | 422.0545 | 513.4498 | 448.6575   | 479.1608 | 559.7736 |
| 26424 | LOC119623 | 149.8971 | -0.00609 | 0.250569 | -0.02432 | 0.980597 | 0.986572 | 176.1781 | 114.9565 | 158.6268 | 145.0883   | 166.8501 | 137.6822 |
| 26317 | LAP6D1    | 507.0701 | -0.00617 | 0.160431 | -0.03849 | 0.969299 | 0.979178 | 569.7328 | 460.9207 | 496.0565 | 540.1747   | 427.8221 | 547.7138 |
| 26043 | YWHAZ     | 34025.97 | -0.00621 | 0.077769 | -0.07989 | 0.936327 | 0.955778 | 33603.93 | 35528.12 | 33164.82 | 33743.06   | 34279.25 | 33836.65 |
| 26249 | ZNF223    | 777.4485 | -0.00621 | 0.127338 | -0.04879 | 0.961084 | 0.973387 | 823.4292 | 781.7041 | 729.8222 | 738.834    | 849.2269 | 741.6748 |
| 26255 | BRD4      | 1976.26  | -0.00623 | 0.131137 | -0.04748 | 0.962129 | 0.974238 | 1779.67  | 2365.366 | 1797.074 | 1977.665   | 1918.782 | 2019.004 |
| 26173 | RRP9      | 1860.502 | -0.00629 | 0.104734 | -0.06007 | 0.952103 | 0.967054 | 1926.033 | 1752.813 | 1920.219 | 1805.791   | 1773.323 | 1984.834 |
| 26282 | PTRH1     | 801.0353 | -0.00632 | 0.145082 | -0.04354 | 0.96527  | 0.976399 | 860.8332 | 664.0105 | 882.8831 | 825.887    | 795.7492 | 776.8491 |
| 26147 | UBR7      | 2356.057 | -0.00641 | 0.100006 | -0.06412 | 0.948872 | 0.964767 | 2301.699 | 2504.956 | 2281.303 | 2339.269   | 2226.814 | 2482.299 |
| 26239 | LOC103215 | 1386.429 | -0.00643 | 0.127091 | -0.05063 | 0.959623 | 0.972277 | 1344.374 | 1598.442 | 1223.791 | 1417.401   | 1381.865 | 1352.702 |
| 26129 | PTPN4     | 2020.307 | -0.0065  | 0.09772  | -0.0665  | 0.946979 | 0.963506 | 1997.588 | 2135.453 | 1939.003 | 2071.414   | 2008.625 | 1969.76  |
| 26402 | LOC119623 | 127.8914 | -0.00663 | 0.239141 | -0.02772 | 0.977887 | 0.984665 | 133.3532 | 119.3358 | 133.5804 | 124.9991   | 113.3729 | 142.7071 |
| 26121 | DES1      | 3682.596 | -0.0068  | 0.099954 | -0.06799 | 0.945797 | 0.962598 | 3736.601 | 3705.431 | 3637.284 | 3770.062   | 3300.648 | 3945.549 |
| 26154 | NETO1     | 3989.385 | -0.00688 | 0.109424 | -0.06283 | 0.949899 | 0.965552 | 3830.924 | 4517.242 | 3651.198 | 3839.258   | 3920.99  | 4716.695 |
| 26178 | AHDC1     | 1305.82  | -0.00698 | 0.117548 | -0.05934 | 0.952679 | 0.967455 | 1276.613 | 1226.75  | 1424.858 | 1388.383   | 1195.763 | 1322.553 |
| 26513 | LOC103216 | 11.65466 | -0.00699 | 0.730447 | -0.00957 | 0.992368 | 0.995063 | 11.9259  | 13.6853  | 9.044508 | 13.39276   | 12.83466 | 9.044815 |
| 26495 | LOC119615 | 22.26487 | -0.00699 | 0.563636 | -0.01241 | 0.990101 | 0.993465 | 16.80468 | 27.37059 | 22.95914 | 13.39276</ |          |          |



|       |           |          |          |          |          |          |          |          |          |          |          |          |          |
|-------|-----------|----------|----------|----------|----------|----------|----------|----------|----------|----------|----------|----------|----------|
| 26205 | RO60      | 3504.633 | -0.00739 | 0.133534 | -0.05538 | 0.955838 | 0.969699 | 3072.003 | 4272.549 | 3198.277 | 3399.529 | 3401.186 | 3684.255 |
| 26542 | LOC119621 | 3.582601 | -0.00744 | 1.292848 | -0.00576 | 0.995406 | 0.997036 | 4.878777 | 2.737059 | 3.478657 | 2.232127 | 2.139111 | 6.029877 |
| 26426 | LOC103241 | 67.35969 | -0.00749 | 0.312436 | -0.02399 | 0.980863 | 0.986765 | 72.09749 | 61.31012 | 68.87741 | 66.96381 | 70.59065 | 64.31869 |
| 26479 | LOC103221 | 22.95106 | -0.00758 | 0.527677 | -0.01437 | 0.988535 | 0.992492 | 22.22554 | 24.08612 | 22.2634  | 20.08914 | 29.94755 | 19.09461 |
| 26019 | NOP10     | 3800.55  | -0.00762 | 0.091405 | -0.08334 | 0.93358  | 0.953888 | 3638.484 | 3917.826 | 3871.745 | 3763.366 | 3980.885 | 3630.991 |
| 26276 | CUNH11or  | 405.4031 | -0.00762 | 0.173185 | -0.04399 | 0.964915 | 0.976125 | 460.7734 | 339.3953 | 416.7431 | 421.872  | 427.8221 | 365.8125 |
| 26383 | LOC103241 | 196.7598 | -0.00767 | 0.251207 | -0.03053 | 0.975643 | 0.983125 | 230.3867 | 133.0211 | 228.1999 | 205.3557 | 194.6591 | 188.9361 |
| 26361 | BNIP1     | 125.7345 | -0.00769 | 0.233804 | -0.03287 | 0.973777 | 0.982017 | 128.4745 | 122.0728 | 128.0146 | 131.6955 | 115.512  | 128.6374 |
| 26110 | ABCB10    | 2596.919 | -0.00784 | 0.113263 | -0.06923 | 0.944804 | 0.961992 | 2825.896 | 2525.211 | 2467.759 | 2392.84  | 2483.507 | 2886.301 |
| 26448 | CARMIL3   | 55.57304 | -0.00785 | 0.388596 | -0.0202  | 0.983885 | 0.988965 | 47.7036  | 64.59459 | 52.87558 | 62.49956 | 70.59065 | 35.17428 |
| 26273 | LOC119621 | 451.9651 | -0.00785 | 0.175821 | -0.04466 | 0.964382 | 0.97584  | 544.7968 | 433.5502 | 378.4779 | 482.1394 | 457.7697 | 415.0565 |
| 26064 | USP5      | 6073.554 | -0.00788 | 0.103964 | -0.0758  | 0.939579 | 0.95836  | 6321.269 | 6020.983 | 5937.372 | 5754.423 | 5589.496 | 6817.781 |
| 26287 | NTH1      | 671.8561 | -0.00813 | 0.190774 | -0.04264 | 0.965987 | 0.976938 | 767.5943 | 498.1448 | 758.3472 | 707.5843 | 549.7514 | 749.7147 |
| 26113 | TRUB2     | 1457.614 | -0.00819 | 0.118665 | -0.069   | 0.944988 | 0.962069 | 1514.047 | 1309.956 | 1566.091 | 1417.401 | 1375.448 | 1562.743 |
| 26258 | NDUFB1    | 1354.112 | -0.0083  | 0.177991 | -0.04662 | 0.962815 | 0.974768 | 1534.647 | 939.9061 | 1599.486 | 1406.24  | 1319.831 | 1324.563 |
| 26410 | LOC119618 | 63.94119 | -0.00831 | 0.319973 | -0.02596 | 0.979285 | 0.985753 | 69.38706 | 60.2153  | 63.31155 | 62.49956 | 59.8951  | 68.3386  |
| 26476 | LOC119618 | 24.11086 | -0.00833 | 0.563215 | -0.01479 | 0.988202 | 0.99227  | 34.69353 | 23.53871 | 13.91463 | 29.01765 | 21.39111 | 22.10955 |
| 26398 | SLC26A1   | 106.1169 | -0.00839 | 0.294622 | -0.02846 | 0.977295 | 0.984257 | 129.5586 | 84.84883 | 107.1426 | 91.51721 | 91.98176 | 131.6523 |
| 26449 | CBY3      | 39.24234 | -0.00839 | 0.415825 | -0.02017 | 0.983906 | 0.988965 | 44.99317 | 40.50847 | 32.00364 | 35.71403 | 47.06043 | 35.17428 |
| 26084 | LOC103214 | 4202.554 | -0.00842 | 0.114023 | -0.0738  | 0.941166 | 0.959243 | 3987.587 | 4802.991 | 3850.873 | 4046.846 | 4507.106 | 4019.918 |
| 25928 | TBL2      | 3715.12  | -0.00842 | 0.08405  | -0.10023 | 0.920159 | 0.943442 | 3739.312 | 3676.418 | 3763.907 | 3700.867 | 3653.601 | 3756.613 |
| 26062 | SUGT1     | 1057.765 | -0.00858 | 0.112861 | -0.07599 | 0.939427 | 0.958279 | 1064.658 | 1089.35  | 1032.465 | 1053.564 | 983.9909 | 1122.562 |
| 26102 | FITM2     | 881.2887 | -0.00877 | 0.124892 | -0.07025 | 0.943997 | 0.961465 | 852.1598 | 952.4966 | 851.5752 | 841.5119 | 834.2532 | 955.7358 |
| 26326 | ZNF185    | 128.6042 | -0.00879 | 0.233643 | -0.03763 | 0.969983 | 0.979525 | 122.5115 | 137.4004 | 128.0146 | 127.2312 | 119.7902 | 136.6772 |
| 26070 | LOC103235 | 2013.178 | -0.00883 | 0.117357 | -0.07522 | 0.94004  | 0.958537 | 1905.434 | 2298.035 | 1856.907 | 1946.415 | 1965.843 | 2106.437 |
| 26125 | KIFC3     | 2473.597 | -0.00883 | 0.132026 | -0.06687 | 0.946685 | 0.963291 | 2653.513 | 2164.466 | 2633.343 | 2296.859 | 2233.232 | 2860.172 |
| 26359 | LOC119618 | 105.6127 | -0.00894 | 0.270241 | -0.03309 | 0.973605 | 0.981952 | 107.3331 | 101.2712 | 107.8384 | 133.9276 | 89.84265 | 93.46309 |
| 26140 | ZNF112    | 782.7817 | -0.00916 | 0.140995 | -0.06499 | 0.948181 | 0.964322 | 733.4429 | 914.7251 | 706.8631 | 796.8693 | 767.9407 | 776.8491 |
| 25905 | GNAI3     | 6077.167 | -0.00919 | 0.088471 | -0.10389 | 0.91726  | 0.941288 | 6168.943 | 6104.737 | 6022.946 | 5910.672 | 5775.599 | 6480.108 |
| 25944 | NQO1      | 81415.53 | -0.00921 | 0.094996 | -0.09694 | 0.922778 | 0.945577 | 87648.32 | 73210.86 | 84170.28 | 80204.79 | 79348.17 | 83910.76 |
| 26028 | TSPAN17   | 4059.892 | -0.0093  | 0.114583 | -0.08119 | 0.935295 | 0.955285 | 4449.445 | 3678.607 | 4097.162 | 4011.132 | 3657.879 | 4465.124 |
| 26534 | LOC103221 | 3.829087 | -0.00934 | 1.373357 | -0.0068  | 0.994576 | 0.996518 | 6.505036 | 3.284471 | 1.391463 | 2.232127 | 8.556443 | 1.004979 |
| 26107 | ZNF484    | 952.1881 | -0.00943 | 0.135776 | -0.06947 | 0.944615 | 0.96191  | 951.3616 | 1028.587 | 886.3618 | 1060.26  | 810.7229 | 975.8351 |
| 25929 | GF2I      | 18502.66 | -0.00945 | 0.094262 | -0.10023 | 0.920162 | 0.943442 | 18593.02 | 19501    | 17676.21 | 17676.21 | 20101.6  |          |
| 26450 | LOC103238 | 33.60481 | -0.00948 | 0.473266 | -0.02003 | 0.984022 | 0.988969 | 39.03022 | 27.37059 | 33.39511 | 37.94616 | 42.78221 | 21.10457 |
| 26146 | MEF2D     | 808.6571 | -0.00961 | 0.14959  | -0.06427 | 0.948758 | 0.964688 | 683.5709 | 961.2551 | 789.6551 | 805.7978 | 793.6101 | 818.0533 |
| 25995 | YIPF1     | 1111.513 | -0.00972 | 0.111326 | -0.08731 | 0.930423 | 0.95154  | 1066.826 | 1195     | 1083.254 | 1129.456 | 1093.086 | 1101.457 |
| 25898 | TXNDC15   | 2196.803 | -0.00976 | 0.093315 | -0.10455 | 0.916734 | 0.94102  | 2126.063 | 2276.686 | 2211.034 | 2209.806 | 2141.25  | 2215.98  |
| 25851 | AK3       | 5476.612 | -0.00985 | 0.088687 | -0.1111  | 0.911535 | 0.93738  | 5393.759 | 5795.449 | 5300.082 | 5321.391 | 5360.611 | 5687.179 |
| 26030 | INPP5K    | 976.6825 | -0.01016 | 0.125337 | -0.08108 | 0.935381 | 0.955324 | 1077.126 | 912.5355 | 953.152  | 892.8508 | 1005.382 | 1019.049 |
| 26150 | COL4A6    | 473.3992 | -0.01017 | 0.15907  | -0.06393 | 0.949026 | 0.964813 | 470.531  | 506.3559 | 453.6169 | 419.6399 | 438.5177 | 551.7337 |
| 25933 | ACTN1     | 12188.34 | -0.01018 | 0.10247  | -0.09939 | 0.920831 | 0.943982 | 11516.62 | 12753.6  | 12432.72 | 11821.34 | 11082.73 | 13523    |
| 25860 | CCNC      | 3313.157 | -0.01046 | 0.095122 | -0.11001 | 0.912402 | 0.937935 | 3470.979 | 3097.256 | 3404.909 | 3281.227 | 3424.716 | 3199.855 |
| 26399 | LOC103221 | 65.42452 | -0.01048 | 0.37461  | -0.02797 | 0.977687 | 0.984531 | 53.66655 | 82.11177 | 59.8329  | 53.57105 | 94.12087 | 49.24399 |
| 25890 | SDC3      | 2589.714 | -0.01058 | 0.100304 | -0.10547 | 0.916001 | 0.94059  | 2533.712 | 2761.145 | 2507.416 | 2560.25  | 2432.169 | 2743.594 |
| 26071 | UNC50     | 1085.967 | -0.01068 | 0.141825 | -0.0753  | 0.939975 | 0.958537 | 1156.27  | 923.4837 | 1193.179 | 1138.385 | 949.7651 | 1154.721 |
| 26414 | LOC103216 | 39.77294 | -0.01069 | 0.421566 | -0.02536 | 0.979771 | 0.986098 | 46.07734 | 29.56024 | 44.52681 | 33.4819  | 42.78221 | 42.20914 |
| 26072 | NDUFA13   | 7812.342 | -0.01074 | 0.142718 | -0.07522 | 0.940037 | 0.958537 | 8933.041 | 5920.259 | 8671.596 | 7986.55  | 7531.809 | 7830.8   |
| 26013 | TMEM104   | 803.4754 | -0.01079 | 0.126977 | -0.08495 | 0.9323   | 0.9528   | 737.7795 | 837.5401 | 847.4008 | 799.1015 | 750.8278 | 848.2027 |
| 25957 | PI4KB     | 2013.848 | -0.01082 | 0.114818 | -0.0942  | 0.92495  | 0.947255 | 1846.888 | 2225.229 | 1995.358 | 2051.325 | 1841.774 | 2122.517 |
| 26501 | LOC119621 | 6.771133 | -0.01085 | 0.9707   | -0.01118 | 0.991082 | 0.99426  | 9.215468 | 3.831883 | 7.653045 | 4.464254 | 6.417332 | 9.044815 |
| 25841 | SPCS2     | 2267.438 | -0.01094 | 0.096473 | -0.11342 | 0.909694 | 0.935885 | 2172.14  | 2292.013 | 2368.27  | 2189.717 | 2226.814 | 2355.672 |
| 26390 | RAD9B     | 65.43167 | -0.01101 | 0.371674 | -0.02961 | 0.976378 | 0.983593 | 71.01331 | 52.00412 | 73.74753 | 42.41041 | 94.12087 | 59.29379 |
| 25967 | HINT3     | 864.1407 | -0.01102 | 0.117859 | -0.09347 | 0.925529 | 0.94752  | 875.4695 | 872.027  | 852.2709 | 830.3512 | 932.6523 | 822.0732 |
| 25952 | SCMADHC   | 2271.456 | -0.01105 | 0.115995 | -0.09528 | 0.92409  | 0.946629 | 2359.16  | 1976.157 | 2506.024 | 2321.412 | 2164.728 | 2271.254 |
| 25976 | MAF4      | 4644.444 | -0.01116 | 0.122169 | -0.09138 | 0.927188 | 0.948899 | 4320.97  | 5513.532 | 4153.516 | 4415.147 | 4667.539 | 4794.757 |
| 25951 | PDHX      | 1882.831 | -0.0112  | 0.117439 | -0.09534 | 0.924042 | 0.946617 | 1841.467 | 2138.191 | 1691.323 | 1888.379 | 1816.105 | 1921.521 |
| 25983 | GRIPAP1   | 1898.558 | -0.01149 | 0.1265   | -0.09084 | 0.927619 | 0.949111 | 1782.922 | 2219.755 | 1717.065 | 1930.79  | 1769.045 | 1971.77  |
| 26481 | LOC103231 | 10.59181 | -0.01164 | 0.823721 | -0.01413 | 0.988728 | 0.992611 | 8.673382 | 16.42235 | 6.957314 | 4.464254 | 14.97377 | 12.05975 |
| 26257 | SLC25A42  | 140.913  | -0.01173 | 0.250309 | -0.04687 | 0.962616 | 0.974641 | 169.1309 | 119.8832 | 137.0591 | 118.3027 | 143.3204 | 157.7818 |
| 26165 | HSPBAP1   | 200.959  | -0.01175 | 0.193389 | -0.06074 | 0.95157  | 0.966844 | 216.8345 | 192.1415 | 196.1962 | 191.9629 | 209.6328 | 198.9859 |
| 26401 | LOC103241 | 39.69671 | -0.01185 | 0.423247 | -0.028   | 0.977661 | 0.984531 | 39.5723  | 43.79295 | 34.78657 | 49.10679 | 42.78221 | 28.13943 |
| 26162 | PROSER3   | 246.3878 | -0.01189 | 0.193491 | -0.06146 | 0.950992 | 0.966368 | 234.7234 | 287.3912 | 221.2426 | 227.677  | 245.9977 | 261.2947 |
| 26526 | LOC103231 | 2.862813 | -0.01203 | 1.543289 | -0.00779 | 0.993781 | 0.995992 | 3.794605 | 3.284471 | 1.391463 | 6.696381 | 0        | 2.009959 |
| 26086 | LOC103216 | 289.488  | -0.01206 | 0.163969 | -0.07352 | 0.941388 | 0.959396 | 295.9792 | 297.2446 | 278.2925 | 287.9444 | 293.0582 | 284.4092 |
| 26131 | LRRC34    | 220.3855 | -0.01244 | 0.187488 | -0.06636 | 0.947089 | 0.963544 | 208.1612 | 238.6716 | 216.3725 | 232.1412 | 213.9111 | 213.0556 |
| 25973 | KAZALD1   | 606.9438 | -0.01248 | 0.135435 | -0.09215 | 0.926583 | 0.948416 | 576.7799 | 604.8901 | 651.2046 | 578.1209 | 575.4208 | 655.2466 |
| 25965 | RAB21     | 4110.106 | -0.01262 | 0.134828 | -0.09364 | 0.925398 | 0.947516 | 3712.207 | 5043.305 | 3631.022 | 3883.901 | 4038.641 | 4351.561 |
| 26008 | PSMB8     | 1009.819 | -0.01314 | 0.153985 | -0.08531 | 0.932015 | 0.952656 | 1188.253 | 822.2125 | 1035.944 | 988.8323 | 926.2349 | 1097.438 |
| 26314 | LOC103238 | 68.64065 | -0.01329 | 0.341291 | -0.03894 | 0.968936 | 0.978915 | 50.41403 | 72.25836 | 83.48776 | 73.66019 | 72.72976 | 59.29379 |
| 26520 | LOC119621 | 2.787705 | -0.0     |          |          |          |          |          |          |          |          |          |          |



|       |           |          |          |          |          |          |          |          |          |          |          |          |          |
|-------|-----------|----------|----------|----------|----------|----------|----------|----------|----------|----------|----------|----------|----------|
| 25863 | ATP5F1A   | 27792.94 | -0.0136  | 0.124026 | -0.10963 | 0.9127   | 0.938179 | 31365.66 | 23280.88 | 29130.97 | 26899.36 | 25515.31 | 30565.45 |
| 26040 | NCOA6     | 1030.094 | -0.01362 | 0.170109 | -0.08008 | 0.93617  | 0.955742 | 859.749  | 1340.064 | 903.7551 | 1013.386 | 1071.694 | 991.9147 |
| 25775 | CRAMP1    | 1225.854 | -0.01371 | 0.111566 | -0.12288 | 0.902201 | 0.930553 | 1303.176 | 1176.388 | 1219.617 | 1158.474 | 1200.041 | 1297.428 |
| 25845 | PORCN     | 787.7854 | -0.01397 | 0.124353 | -0.11231 | 0.910579 | 0.936651 | 753.5001 | 861.6262 | 761.1301 | 776.7802 | 763.6625 | 810.0135 |
| 25769 | ZNF346    | 1151.533 | -0.014   | 0.112355 | -0.12459 | 0.900848 | 0.929374 | 1224.031 | 1129.858 | 1119.432 | 1178.563 | 1067.416 | 1189.896 |
| 25875 | ABRAXAS1  | 885.0011 | -0.014   | 0.130577 | -0.10722 | 0.914614 | 0.939674 | 788.7357 | 927.863  | 949.6733 | 852.6725 | 951.9042 | 839.1579 |
| 26098 | SSNA1     | 1337.211 | -0.01409 | 0.197504 | -0.07132 | 0.943139 | 0.960702 | 1569.882 | 855.6047 | 1607.139 | 1294.634 | 1309.136 | 1386.872 |
| 25755 | COG7      | 1719.292 | -0.0141  | 0.111271 | -0.1267  | 0.899174 | 0.928152 | 1813.821 | 1606.654 | 1767.158 | 1734.363 | 1563.69  | 1830.068 |
| 25822 | PSMD2     | 23039.05 | -0.01429 | 0.121924 | -0.11719 | 0.906709 | 0.9335   | 25223.82 | 20959.85 | 23284.74 | 21937.34 | 20116.2  | 26712.35 |
| 25696 | DUSP11    | 2318.627 | -0.01432 | 0.10579  | -0.13535 | 0.892335 | 0.923207 | 2326.093 | 2415.728 | 2242.342 | 2285.698 | 2528.429 | 2113.472 |
| 25735 | PSMD10    | 1343.832 | -0.01435 | 0.111148 | -0.1291  | 0.897282 | 0.926918 | 1302.091 | 1433.124 | 1312.149 | 1330.348 | 1431.065 | 1254.214 |
| 26284 | OTX1      | 68.23749 | -0.01444 | 0.336364 | -0.04293 | 0.965758 | 0.976818 | 52.04029 | 82.65918 | 70.26887 | 71.42806 | 72.72976 | 60.29877 |
| 25823 | PPCS      | 1155.139 | -0.01456 | 0.124567 | -0.11686 | 0.906968 | 0.933731 | 1098.809 | 1313.241 | 1068.643 | 1200.884 | 1133.729 | 1115.527 |
| 25922 | LOC119621 | 907.6739 | -0.01465 | 0.145258 | -0.10084 | 0.919676 | 0.94322  | 828.8501 | 864.9107 | 1038.727 | 1013.386 | 911.2611 | 788.9089 |
| 25901 | PEG10     | 31284.18 | -0.01471 | 0.140875 | -0.10442 | 0.916836 | 0.941048 | 26821.89 | 39629.88 | 27881.43 | 30727.46 | 29412.77 | 33231.66 |
| 25816 | TPCN1     | 1230.81  | -0.01475 | 0.124806 | -0.1182  | 0.905911 | 0.93286  | 1268.482 | 1161.608 | 1288.494 | 1104.903 | 1176.511 | 1384.862 |
| 25682 | RTL6      | 4306.507 | -0.01476 | 0.106768 | -0.13824 | 0.89005  | 0.921345 | 4335.607 | 4349.734 | 4308.664 | 4241.041 | 3801.2   | 4802.797 |
| 25492 | LRBA      | 8771.252 | -0.01495 | 0.090349 | -0.16552 | 0.868538 | 0.905776 | 8637.062 | 9349.246 | 8469.138 | 8307.977 | 8648.424 | 9125.662 |
| 26445 | LOC103231 | 11.71174 | -0.01524 | 0.724537 | -0.02103 | 0.98322  | 0.988425 | 11.9259  | 9.853413 | 13.2189  | 13.39276 | 12.83466 | 9.044815 |
| 25689 | TGDS      | 1209.918 | -0.01528 | 0.111863 | -0.1366  | 0.891347 | 0.922436 | 1281.492 | 1141.354 | 1223.791 | 1279.009 | 1170.094 | 1163.766 |
| 26447 | LOC119621 | 14.16911 | -0.01542 | 0.759308 | -0.02031 | 0.983797 | 0.98893  | 13.55216 | 16.96977 | 11.1317  | 20.08914 | 19.252   | 4.019918 |
| 26370 | RNF225    | 27.66771 | -0.01569 | 0.497197 | -0.03157 | 0.974819 | 0.982767 | 34.15144 | 21.34906 | 27.82925 | 22.32127 | 34.22577 | 26.12947 |
| 25887 | ZNF354B   | 500.9427 | -0.01584 | 0.149062 | -0.10626 | 0.915378 | 0.940191 | 453.1842 | 559.4549 | 499.5351 | 464.2824 | 517.6648 | 511.5345 |
| 25836 | CREB3L2   | 3384.475 | -0.01608 | 0.140834 | -0.11418 | 0.909095 | 0.935533 | 2955.997 | 4227.661 | 3027.823 | 3341.494 | 3219.362 | 3534.513 |
| 25706 | MEIS3     | 1108.183 | -0.01627 | 0.121574 | -0.13387 | 0.893508 | 0.92409  | 1222.405 | 1013.807 | 1109.692 | 1100.439 | 1046.025 | 1156.731 |
| 25694 | LOC103231 | 1128.628 | -0.0165  | 0.121758 | -0.13548 | 0.892232 | 0.923137 | 1093.93  | 1271.09  | 1040.118 | 1093.742 | 1142.285 | 1130.602 |
| 25798 | KIAA0895L | 916.0164 | -0.0165  | 0.137266 | -0.12019 | 0.904335 | 0.931923 | 926.9677 | 910.8933 | 933.6715 | 814.7263 | 838.5314 | 1071.308 |
| 25522 | UNC119B   | 3552.216 | -0.01653 | 0.1022   | -0.16175 | 0.871503 | 0.907756 | 3745.817 | 3555.44  | 3422.998 | 3491.047 | 3242.892 | 3855.101 |
| 25828 | CCDC61    | 563.6755 | -0.01655 | 0.142922 | -0.11583 | 0.907787 | 0.934394 | 620.1468 | 521.6835 | 562.1509 | 522.3177 | 549.7514 | 606.0026 |
| 25417 | LOC119621 | 4354.784 | -0.0167  | 0.09364  | -0.17839 | 0.858416 | 0.897869 | 4351.869 | 4664.496 | 4126.383 | 4149.524 | 4355.229 | 4481.203 |
| 25820 | C1D       | 1037.686 | -0.01671 | 0.141717 | -0.11792 | 0.906133 | 0.93298  | 1000.149 | 963.9922 | 1161.176 | 1145.081 | 1082.39  | 873.3272 |
| 26014 | LOC103241 | 269.6143 | -0.01676 | 0.198475 | -0.08442 | 0.93272  | 0.953193 | 282.9691 | 220.607  | 310.2962 | 243.3018 | 295.1973 | 265.3146 |
| 25525 | UBE2H     | 21483.69 | -0.01681 | 0.104193 | -0.16134 | 0.871826 | 0.908016 | 20585.19 | 24130.46 | 20116.38 | 20714.14 | 20259.52 | 23096.44 |
| 25547 | ARHGGEF25 | 1141.228 | -0.01685 | 0.106783 | -0.15775 | 0.874651 | 0.910189 | 1138.381 | 1164.345 | 1144.478 | 1091.51  | 1118.755 | 1189.896 |
| 26256 | IQCH      | 49.37138 | -0.01702 | 0.361912 | -0.04702 | 0.962496 | 0.974557 | 49.32986 | 48.17224 | 50.78839 | 49.10679 | 55.61688 | 43.21412 |
| 25565 | UQCC1     | 1976.943 | -0.01708 | 0.109571 | -0.15586 | 0.876143 | 0.911099 | 2137.447 | 1879.265 | 1954.309 | 1950.879 | 1818.244 | 2121.512 |
| 26506 | LOC103221 | 2.796023 | -0.01724 | 1.673663 | -0.0103  | 0.991779 | 0.994698 | 1.084173 | 6.568942 | 0.695731 | 0        | 6.417332 | 2.009959 |
| 25712 | CAPZB     | 4100.374 | -0.01735 | 0.130381 | -0.13305 | 0.894152 | 0.92444  | 3858.571 | 4955.172 | 3563.536 | 3984.347 | 3908.155 | 4332.466 |
| 26034 | TRIM34    | 166.1176 | -0.01741 | 0.216081 | -0.08059 | 0.935768 | 0.955584 | 151.7842 | 180.0985 | 167.6713 | 171.8738 | 177.5462 | 147.732  |
| 25747 | ESCO1     | 2698.248 | -0.0176  | 0.137484 | -0.12803 | 0.988125 | 0.927356 | 2389.517 | 3337.57  | 2416.275 | 2734.356 | 2677.523 | 2674.25  |
| 26096 | LOC119621 | 125.1925 | -0.01762 | 0.246221 | -0.07156 | 0.942948 | 0.960618 | 120.3432 | 140.1374 | 115.4914 | 136.1597 | 130.4858 | 108.5378 |
| 26430 | LOC103241 | 11.34959 | -0.01792 | 0.764153 | -0.02345 | 0.981293 | 0.987011 | 15.7205  | 8.211177 | 10.43597 | 6.696381 | 14.97377 | 12.05975 |
| 25532 | NCOA3     | 2981.109 | -0.01809 | 0.112789 | -0.16038 | 0.872578 | 0.908556 | 2882.273 | 3331.001 | 2790.579 | 2964.265 | 2716.671 | 3201.865 |
| 26322 | LOC103221 | 31.80139 | -0.0182  | 0.477841 | -0.03808 | 0.969623 | 0.979274 | 27.10432 | 38.86624 | 31.30791 | 26.78552 | 23.53022 | 43.21412 |
| 26406 | LOC119621 | 16.15339 | -0.01822 | 0.679391 | -0.02681 | 0.978611 | 0.985244 | 17.88885 | 11.49565 | 19.48048 | 24.5534  | 6.417332 | 17.08465 |
| 25737 | TTC9      | 1238.843 | -0.01831 | 0.14201  | -0.12892 | 0.897424 | 0.926957 | 1086.883 | 1501.551 | 1151.435 | 1267.848 | 1187.206 | 1238.135 |
| 25576 | LIX1L     | 1921.755 | -0.01845 | 0.119183 | -0.15477 | 0.876999 | 0.911598 | 1778.043 | 2224.682 | 1799.857 | 1901.772 | 1884.556 | 1941.62  |
| 25346 | CEBPB     | 2184.111 | -0.01853 | 0.097221 | -0.19058 | 0.848855 | 0.89035  | 2218.76  | 2282.16  | 2096.934 | 2131.681 | 2104.885 | 2270.249 |
| 25086 | ATP5PB    | 6106.838 | -0.01866 | 0.080329 | -0.23226 | 0.816337 | 0.864998 | 6167.317 | 6069.702 | 6203.141 | 6138.349 | 5938.171 | 6124.345 |
| 26433 | LOC103231 | 9.932866 | -0.01868 | 0.812174 | -0.023   | 0.981654 | 0.987258 | 7.047123 | 9.306001 | 13.2189  | 11.16063 | 12.83466 | 6.029877 |
| 25570 | INPP5A    | 880.83   | -0.01875 | 0.120743 | -0.15528 | 0.876603 | 0.9114   | 891.19   | 901.5873 | 871.7514 | 857.1368 | 808.5838 | 954.7305 |
| 25541 | NAA38     | 1357.938 | -0.01877 | 0.117954 | -0.15912 | 0.873577 | 0.909285 | 1240.294 | 1494.982 | 1361.546 | 1374.99  | 1407.535 | 1268.284 |
| 25815 | LOC103211 | 343.2823 | -0.01891 | 0.15985  | -0.11831 | 0.905819 | 0.932853 | 334.4673 | 362.3866 | 338.1254 | 377.2295 | 320.8666 | 326.6183 |
| 26471 | LOC119621 | 3.960839 | -0.01892 | 1.25259  | -0.01511 | 0.987948 | 0.992203 | 2.710432 | 5.474118 | 4.174388 | 2.232127 | 2.139111 | 7.034856 |
| 25367 | TAB1      | 1501.71  | -0.01901 | 0.101188 | -0.18783 | 0.851014 | 0.891905 | 1470.138 | 1543.154 | 1524.347 | 1504.454 | 1422.509 | 1545.658 |
| 25777 | EIF2AK2   | 2463.688 | -0.01904 | 0.155293 | -0.12262 | 0.902406 | 0.930692 | 2100.585 | 3197.98  | 2141.461 | 2437.483 | 2402.221 | 2502.399 |
| 26337 | LOC103231 | 28.38755 | -0.01906 | 0.529136 | -0.03602 | 0.97127  | 0.980434 | 24.39389 | 30.65506 | 29.22072 | 33.4819  | 38.50399 | 14.06971 |
| 26435 | LOC119621 | 9.594423 | -0.01908 | 0.832738 | -0.02291 | 0.981725 | 0.987258 | 7.589209 | 6.568942 | 14.61036 | 8.928508 | 12.83466 | 7.034856 |
| 25469 | APOO      | 896.2851 | -0.01908 | 0.112524 | -0.16955 | 0.865361 | 0.90334  | 934.5569 | 880.7856 | 889.8404 | 901.7793 | 898.4265 | 872.3222 |
| 25221 | BCAP31    | 8830.016 | -0.01913 | 0.090575 | -0.21119 | 0.832738 | 0.877774 | 8968.277 | 9136.851 | 8567.236 | 8660.653 | 8233.437 | 9413.643 |
| 25578 | PRIM1     | 1069.066 | -0.01914 | 0.123806 | -0.1546  | 0.977133 | 0.911666 | 1047.853 | 1101.393 | 1072.818 | 1185.259 | 1067.416 | 939.6558 |
| 25480 | AEBP2     | 3552.757 | -0.01916 | 0.11411  | -0.16791 | 0.866657 | 0.904244 | 3378.282 | 4112.705 | 3239.325 | 3508.904 | 3433.273 | 3644.056 |
| 25376 | MBD1      | 3232.176 | -0.01933 | 0.104141 | -0.18558 | 0.852777 | 0.893406 | 3164.7   | 3558.177 | 3042.433 | 3187.477 | 3035.398 | 3404.87  |
| 26375 | LOC119621 | 17.08413 | -0.01936 | 0.621922 | -0.03113 | 0.975164 | 0.982899 | 14.09425 | 21.89647 | 16.00182 | 11.16063 | 19.252   | 20.09959 |
| 26538 | LOC103221 | 0.774094 | -0.01941 | 3.092636 | -0.00628 | 0.994991 | 0.996754 | 0        | 0.547412 | 2.087194 | 0        | 0        | 2.009959 |
| 25253 | VPS50     | 3097.995 | -0.01949 | 0.094039 | -0.20721 | 0.835844 | 0.879932 | 3083.387 | 3319.505 | 2954.075 | 3118.281 | 3003.311 | 3109.406 |
| 26037 | ZNF345    | 113.6902 | -0.0195  | 0.242762 | -0.08031 | 0.935989 | 0.955689 | 113.8381 | 113.8617 | 115.4914 | 118.3027 | 109.0946 | 111.5527 |
| 25268 | TUBGCP2   | 4811.331 | -0.01964 | 0.096313 | -0.20393 | 0.838405 | 0.882113 | 4973.1   | 4802.991 | 4762.281 | 4834.787 | 4357.368 | 5137.455 |
| 26385 | LOC103241 | 15.0287  | -0.01971 | 0.652919 | -0.03019 | 0.975919 | 0.983282 | 17.34676 | 11.49565 | 16.69755 | 17.85702 | 10.69555 | 16.07967 |
| 25347 | XPNPEP1   | 2379.232 | -0.01978 | 0.10389  | -0.19041 | 0.848985 | 0.890451 | 2378.675 | 2544.918 | 2268.084 | 2325.876 | 2218.258 | 2        |



|       |           |          |          |          |          |          |          |          |          |          |          |          |          |
|-------|-----------|----------|----------|----------|----------|----------|----------|----------|----------|----------|----------|----------|----------|
| 26067 | TBR1      | 115.3838 | -0.0199  | 0.263321 | -0.07556 | 0.939772 | 0.958447 | 106.791  | 123.7151 | 115.4914 | 133.9276 | 121.9293 | 90.44815 |
| 26259 | LOC119620 | 38.3819  | -0.01997 | 0.427891 | -0.04666 | 0.962782 | 0.974768 | 31.9831  | 37.77142 | 45.91827 | 31.24978 | 49.19955 | 34.1693  |
| 25521 | WEE1      | 1518.442 | -0.02005 | 0.123851 | -0.16192 | 0.871369 | 0.907697 | 1565.003 | 1630.192 | 1397.724 | 1457.579 | 1364.753 | 1695.4   |
| 26466 | LOC119620 | 3.951304 | -0.02011 | 1.2728   | -0.0158  | 0.987393 | 0.991833 | 2.710432 | 2.189647 | 6.957314 | 6.696381 | 2.139111 | 3.014938 |
| 25368 | ZBTB22    | 1194.325 | -0.02012 | 0.107527 | -0.18715 | 0.851544 | 0.892396 | 1229.452 | 1171.461 | 1210.573 | 1185.259 | 1123.033 | 1246.175 |
| 25409 | KLHDC3    | 1771.474 | -0.02016 | 0.112371 | -0.17937 | 0.85765  | 0.897309 | 1885.918 | 1685.481 | 1786.638 | 1705.345 | 1627.863 | 1937.6   |
| 25281 | WDFY3     | 8901.35  | -0.02042 | 0.100959 | -0.20226 | 0.839714 | 0.883026 | 8843.597 | 9558.358 | 8499.054 | 8310.209 | 8434.513 | 9762.371 |
| 25844 | GDPD1     | 296.6093 | -0.02053 | 0.182626 | -0.11244 | 0.910474 | 0.936579 | 273.7536 | 330.0893 | 288.7285 | 323.6584 | 310.171  | 253.2548 |
| 25465 | BOP1      | 2978.388 | -0.02064 | 0.121627 | -0.1697  | 0.865246 | 0.903265 | 3201.562 | 2679.581 | 3123.834 | 3013.371 | 2579.767 | 3272.213 |
| 26177 | KCTD16    | 67.07888 | -0.02072 | 0.348456 | -0.05945 | 0.952593 | 0.96744  | 66.13454 | 70.61612 | 64.00729 | 62.49956 | 91.98176 | 47.23404 |
| 25980 | CASS4     | 171.8527 | -0.02078 | 0.228203 | -0.09107 | 0.92744  | 0.949052 | 151.2421 | 192.1415 | 173.9328 | 160.7131 | 205.3546 | 147.732  |
| 25257 | ITGB4     | 2408.303 | -0.0208  | 0.101021 | -0.20593 | 0.836842 | 0.880843 | 2440.473 | 2380.147 | 2462.889 | 2377.215 | 2203.284 | 2585.812 |
| 25427 | LIMD2     | 3803.357 | -0.0209  | 0.118302 | -0.17664 | 0.859789 | 0.898946 | 4049.927 | 3451.979 | 3997.672 | 3787.919 | 3317.761 | 4214.884 |
| 25382 | ZNF343    | 1647.774 | -0.02105 | 0.114267 | -0.1842  | 0.853853 | 0.894322 | 1611.081 | 1828.355 | 1543.132 | 1629.453 | 1538.021 | 1736.605 |
| 25341 | ACTR8     | 1882.293 | -0.02111 | 0.110032 | -0.19182 | 0.847882 | 0.88947  | 1856.104 | 2062.1   | 1774.115 | 1830.344 | 1771.184 | 1999.909 |
| 26497 | LOC103234 | 1.763931 | -0.02113 | 1.755385 | -0.01204 | 0.990394 | 0.993683 | 1.626259 | 2.189647 | 1.391463 | 2.232127 | 2.139111 | 1.004979 |
| 25711 | RFESD     | 348.169  | -0.02116 | 0.15882  | -0.13324 | 0.894004 | 0.924394 | 331.7569 | 372.24   | 345.7785 | 357.1403 | 361.5097 | 320.5885 |
| 25178 | SUGP2     | 5148.339 | -0.0213  | 0.097933 | -0.21747 | 0.827844 | 0.874106 | 5405.685 | 5314.274 | 4845.073 | 4975.411 | 4832.251 | 5517.337 |
| 25537 | PLP2      | 8801.331 | -0.0213  | 0.133221 | -0.15992 | 0.872947 | 0.908794 | 7629.324 | 10950.97 | 8019     | 8591.457 | 8721.154 | 8896.078 |
| 25751 | SPSB2     | 790.1793 | -0.02142 | 0.16818  | -0.12737 | 0.898647 | 0.927752 | 904.2001 | 625.6917 | 862.0112 | 779.0123 | 688.7936 | 881.367  |
| 25582 | MAK16     | 1143.791 | -0.02144 | 0.139304 | -0.15394 | 0.877657 | 0.912014 | 1070.078 | 1371.814 | 1015.072 | 1149.545 | 1099.503 | 1156.731 |
| 26303 | LOC119620 | 24.22573 | -0.02167 | 0.530451 | -0.04085 | 0.967415 | 0.977787 | 18.97302 | 28.46541 | 25.04633 | 31.24978 | 23.53022 | 18.08963 |
| 26300 | LOC119619 | 23.05227 | -0.02179 | 0.531919 | -0.04096 | 0.967328 | 0.977787 | 26.56223 | 22.44388 | 20.17621 | 20.08914 | 29.94755 | 19.09461 |
| 26046 | ZNF628    | 116.4729 | -0.02194 | 0.280542 | -0.07821 | 0.937659 | 0.957027 | 117.6327 | 90.87036 | 144.0164 | 95.98146 | 134.764  | 115.5726 |
| 26001 | TELO2     | 570.7775 | -0.02196 | 0.254222 | -0.0864  | 0.931151 | 0.952004 | 739.9479 | 319.1411 | 668.5978 | 488.8358 | 551.8906 | 656.2516 |
| 25637 | TNFSF4    | 536.0834 | -0.02199 | 0.152338 | -0.14432 | 0.885245 | 0.917961 | 588.1637 | 461.4682 | 570.4997 | 508.925  | 566.8643 | 520.5794 |
| 26316 | TRNAI-AAL | 27.09557 | -0.02208 | 0.573841 | -0.03848 | 0.969307 | 0.979178 | 35.23561 | 12.04306 | 34.09084 | 29.01765 | 32.08666 | 20.09959 |
| 25029 | PARP12    | 3680.648 | -0.02212 | 0.091849 | -0.24086 | 0.809661 | 0.860019 | 3767.5   | 3747.581 | 3616.412 | 3665.153 | 3431.134 | 3856.106 |
| 25962 | LOC103233 | 132.5811 | -0.02222 | 0.236186 | -0.09407 | 0.92505  | 0.947283 | 119.8011 | 133.0211 | 147.4951 | 127.2312 | 143.3204 | 124.6175 |
| 26164 | PCDHB6    | 60.83499 | -0.02223 | 0.365681 | -0.06079 | 0.951528 | 0.966839 | 44.45108 | 73.90059 | 65.39875 | 49.10679 | 74.86887 | 57.28383 |
| 25152 | POLR2I    | 1273.304 | -0.02234 | 0.101022 | -0.22111 | 0.825009 | 0.872012 | 1281.492 | 1271.09  | 1296.148 | 1274.545 | 1266.354 | 1250.194 |
| 25723 | GGCT      | 297.6583 | -0.02241 | 0.170648 | -0.13135 | 0.895498 | 0.92547  | 290.5583 | 324.0678 | 284.5541 | 323.6584 | 271.6671 | 291.444  |
| 25471 | LOC103225 | 781.7705 | -0.0225  | 0.132932 | -0.16929 | 0.865655 | 0.903439 | 762.1734 | 852.8676 | 752.7813 | 770.0838 | 699.4892 | 853.2276 |
| 25242 | POLR2B    | 4095.742 | -0.02252 | 0.107938 | -0.20861 | 0.834755 | 0.879158 | 3930.668 | 4655.19  | 3799.389 | 4049.078 | 3908.155 | 4231.969 |
| 25419 | SWI5      | 969.386  | -0.02254 | 0.126435 | -0.17831 | 0.858479 | 0.897869 | 1003.402 | 859.984  | 1067.252 | 970.9752 | 969.0171 | 945.6857 |
| 24947 | SLC25A36  | 4043.295 | -0.02255 | 0.088188 | -0.2557  | 0.798179 | 0.850586 | 4064.564 | 4238.61  | 3924.621 | 3917.383 | 3968.05  | 4146.545 |
| 25762 | FOSL1     | 1515.079 | -0.02262 | 0.179736 | -0.12584 | 0.899861 | 0.928608 | 1263.061 | 2063.195 | 1254.404 | 1578.114 | 1401.117 | 1530.584 |
| 25058 | NFS1      | 2465.172 | -0.02266 | 0.095743 | -0.23671 | 0.812878 | 0.862424 | 2485.466 | 2625.387 | 2342.528 | 2470.965 | 2406.5   | 2460.19  |
| 26321 | THPO      | 22.34616 | -0.0228  | 0.596358 | -0.03823 | 0.969505 | 0.979265 | 17.88885 | 29.01283 | 19.48048 | 24.5534  | 32.08666 | 11.05477 |
| 26460 | LOC119620 | 4.620329 | -0.02289 | 1.29597  | -0.01766 | 0.98591  | 0.990568 | 10.29964 | 2.737059 | 0.695731 | 6.696381 | 4.278221 | 3.014938 |
| 25113 | PLCG1     | 5119.529 | -0.02291 | 0.10029  | -0.22844 | 0.819304 | 0.867327 | 5232.76  | 5088.74  | 5167.893 | 4933.001 | 4656.844 | 5637.935 |
| 26126 | LRRC70    | 97.94408 | -0.02305 | 0.344718 | -0.06686 | 0.946695 | 0.963291 | 124.1378 | 85.94365 | 83.48776 | 93.74933 | 139.0422 | 61.30375 |
| 25655 | ZNF777    | 842.0165 | -0.02306 | 0.163064 | -0.1414  | 0.88755  | 0.919724 | 773.5572 | 1054.315 | 720.082  | 772.3159 | 836.3923 | 895.4367 |
| 25108 | PAFAH1B1  | 6721.2   | -0.0231  | 0.100965 | -0.2288  | 0.819026 | 0.867205 | 6546.777 | 7416.335 | 6367.334 | 6319.151 | 6522.148 | 7155.454 |
| 25991 | LOC103225 | 100.3244 | -0.0231  | 0.263619 | -0.08763 | 0.930171 | 0.95143  | 110.0435 | 99.08154 | 95.3152  | 95.98146 | 91.98176 | 109.5428 |
| 25608 | FNBP1L    | 3435.156 | -0.02323 | 0.155387 | -0.14952 | 0.881141 | 0.914743 | 2992.317 | 4494.251 | 2901.896 | 3287.923 | 3465.359 | 3469.189 |
| 26235 | LOC119620 | 32.11098 | -0.02325 | 0.451076 | -0.05154 | 0.958897 | 0.971812 | 28.73058 | 35.58177 | 33.39511 | 24.5534  | 34.22577 | 36.17926 |
| 26428 | LOC119619 | 6.473256 | -0.02333 | 0.985562 | -0.02368 | 0.981111 | 0.98694  | 4.878777 | 8.211177 | 6.957314 | 4.464254 | 4.278221 | 10.04979 |
| 25732 | CDK20     | 235.5195 | -0.02347 | 0.181116 | -0.1296  | 0.896886 | 0.926618 | 243.3968 | 219.5121 | 249.0718 | 238.8376 | 233.1631 | 229.1353 |
| 28142 | LOC119618 | 0.464147 | -0.02354 | 3.69049  | -0.00638 | 0.994912 | NA       | 1.084173 | 0        | 0.695731 | 0        | 0        | 1.004979 |
| 25087 | DNAJA1    | 9172.497 | -0.02368 | 0.101932 | -0.23231 | 0.816298 | 0.864998 | 8826.792 | 10338.97 | 8580.455 | 9037.882 | 8729.711 | 9521.175 |
| 26374 | ARL14     | 12.37238 | -0.02374 | 0.762813 | -0.03112 | 0.975172 | 0.982899 | 17.88885 | 9.853413 | 9.044508 | 11.16063 | 19.252   | 7.034856 |
| 26103 | LOC119620 | 107.808  | -0.02394 | 0.341629 | -0.07008 | 0.944134 | 0.961544 | 133.3532 | 65.14201 | 129.406  | 107.1421 | 79.14709 | 132.6573 |
| 25348 | IRS1      | 710.02   | -0.02399 | 0.126154 | -0.19019 | 0.849163 | 0.890602 | 683.0288 | 758.7128 | 708.9503 | 694.1915 | 669.5416 | 745.6948 |
| 25364 | RNF175    | 566.5704 | -0.02401 | 0.127459 | -0.18835 | 0.850601 | 0.89155  | 572.9853 | 576.4246 | 563.5424 | 564.7281 | 569.0034 | 552.7387 |
| 25373 | LCMT1     | 688.9867 | -0.02416 | 0.129934 | -0.18596 | 0.852473 | 0.893194 | 650.5036 | 748.312  | 688.0783 | 645.0847 | 682.3763 | 719.5653 |
| 25948 | ZNF524    | 149.9704 | -0.02434 | 0.252065 | -0.09658 | 0.923063 | 0.945724 | 167.5047 | 111.672  | 174.6286 | 149.5525 | 149.7377 | 146.727  |
| 25804 | LOC119620 | 183.1277 | -0.02439 | 0.203977 | -0.11958 | 0.904812 | 0.932198 | 183.7673 | 194.8786 | 174.6286 | 167.4095 | 203.2155 | 174.8664 |
| 25296 | TTF1      | 1469.322 | -0.02454 | 0.123037 | -0.19946 | 0.8419   | 0.8848   | 1404.004 | 1694.24  | 1348.327 | 1395.079 | 1473.847 | 1500.434 |
| 25999 | RBPMS2    | 112.0444 | -0.02456 | 0.2824   | -0.08695 | 0.93071  | 0.951687 | 97.57555 | 142.8745 | 100.1853 | 100.4457 | 100.5382 | 130.6473 |
| 25468 | MBD4      | 1895.687 | -0.0246  | 0.14516  | -0.16949 | 0.865408 | 0.90334  | 1618.67  | 2360.987 | 1753.939 | 1957.575 | 1876     | 1806.953 |
| 25595 | MAP3K13   | 474.1859 | -0.02465 | 0.16199  | -0.15216 | 0.879059 | 0.91306  | 446.1371 | 553.9808 | 435.5278 | 497.7643 | 419.2657 | 492.4399 |
| 26298 | CYP26B1   | 22.49332 | -0.02471 | 0.601351 | -0.0411  | 0.967219 | 0.977775 | 15.7205  | 21.34906 | 29.91645 | 31.24978 | 25.66933 | 11.05477 |
| 25055 | RNF34     | 2010.096 | -0.02483 | 0.104736 | -0.23704 | 0.812627 | 0.862251 | 2052.339 | 2118.484 | 1916.74  | 1890.612 | 1933.756 | 2148.646 |
| 24894 | IST1      | 4932.262 | -0.02483 | 0.093287 | -0.26617 | 0.790107 | 0.843777 | 5161.746 | 4895.504 | 4873.598 | 4801.305 | 4603.366 | 5258.053 |
| 24612 | EIF4A2    | 17973.47 | -0.02484 | 0.078991 | -0.31444 | 0.753187 | 0.813549 | 18302.46 | 18237.57 | 17848.99 | 17785.59 | 17185.62 | 18480.57 |
| 25180 | KIAA1109  | 8330.419 | -0.02486 | 0.114526 | -0.2171  | 0.828132 | 0.874306 | 7879.225 | 9687.547 | 7644.001 | 7879.408 | 8000.274 | 8892.058 |
| 25114 | LPAR1     | 7342.541 | -0.02488 | 0.108971 | -0.22828 | 0.819429 | 0.867425 | 6860.103 | 8507.874 | 6850.867 | 7214.234 | 7136.073 | 7486.092 |
| 26492 | LOC119620 | 1.805371 | -0.0249  | 1.883457 | -0.01322 | 0.989454 | 0.992928 | 3.794605 | 1.094824 | 0.695731 | 2.232127 | 0        | 3.014938 |
| 25084 | NCOR2     | 2403.69  | -0.025   | 0.107273 | -0.233   | 0.815758 | 0.864572 | 2253.453 | 2568.456 | 2455.236 | 2466.5   | 2169.058 | 2509.434 |
| 25397 | TMEM70    | 1547.837 | -0.02511 | 0.137713 | -0.18236 | 0.855298 | 0.895306 | 1665.    |          |          |          |          |          |



|       |           |          |          |          |          |          |          |          |          |          |          |          |          |
|-------|-----------|----------|----------|----------|----------|----------|----------|----------|----------|----------|----------|----------|----------|
| 25245 | NEU3      | 676.6723 | -0.026   | 0.124812 | -0.2083  | 0.834991 | 0.879313 | 721.517  | 657.989  | 669.2936 | 645.0847 | 688.7936 | 677.3562 |
| 26286 | LOC103232 | 18.80909 | -0.02601 | 0.607216 | -0.04284 | 0.96583  | 0.976831 | 15.7205  | 22.9913  | 18.08902 | 11.16063 | 27.80844 | 17.08465 |
| 25022 | UGGT1     | 7999.851 | -0.02607 | 0.107801 | -0.24188 | 0.808874 | 0.859401 | 7724.189 | 9050.36  | 7446.413 | 7854.855 | 7397.045 | 8526.246 |
| 24818 | HPRT1     | 3055.939 | -0.02621 | 0.09435  | -0.27781 | 0.78116  | 0.836777 | 2961.96  | 3005.838 | 3281.069 | 3046.853 | 3112.406 | 2927.505 |
| 26305 | LOC103232 | 22.59036 | -0.02622 | 0.647456 | -0.0405  | 0.967696 | 0.977922 | 34.15144 | 10.40082 | 22.95914 | 35.71403 | 19.252   | 13.06473 |
| 24966 | PTBP3     | 15556.82 | -0.02637 | 0.104596 | -0.25208 | 0.800979 | 0.852898 | 14527.37 | 17903.65 | 14667.41 | 15075.79 | 15335.28 | 15831.44 |
| 24787 | PRXL2C    | 2035.609 | -0.02652 | 0.093547 | -0.28354 | 0.776763 | 0.833108 | 2032.824 | 2088.376 | 2040.58  | 1970.968 | 2092.05  | 1988.854 |
| 25220 | RRAS      | 1048.807 | -0.02653 | 0.125569 | -0.21124 | 0.832698 | 0.877767 | 1002.318 | 1180.22  | 996.2873 | 988.8323 | 1009.66  | 1115.527 |
| 25037 | LPIN2     | 1190.306 | -0.02658 | 0.111081 | -0.23931 | 0.810868 | 0.860968 | 1207.768 | 1250.836 | 1149.348 | 1120.528 | 1155.12  | 1258.234 |
| 26312 | LOC119621 | 14.35027 | -0.02665 | 0.681213 | -0.03912 | 0.968797 | 0.978849 | 11.9259  | 19.15941 | 12.52316 | 17.85702 | 8.556443 | 16.07967 |
| 25446 | ARID2     | 2426.251 | -0.02678 | 0.155016 | -0.17273 | 0.862861 | 0.901484 | 2092.995 | 3148.713 | 2105.283 | 2401.769 | 2312.379 | 2496.369 |
| 25739 | DUSP23    | 318.5669 | -0.02682 | 0.208198 | -0.12881 | 0.897511 | 0.926994 | 363.1979 | 233.7448 | 368.0419 | 303.5693 | 327.2839 | 315.5636 |
| 26363 | TSACC     | 11.40756 | -0.02684 | 0.818999 | -0.03277 | 0.973858 | 0.982059 | 14.09425 | 7.116354 | 12.52316 | 17.85702 | 12.83466 | 4.019918 |
| 25752 | ZNF821    | 171.7857 | -0.02688 | 0.211156 | -0.1273  | 0.898705 | 0.927775 | 191.8986 | 170.2451 | 157.2353 | 180.8023 | 164.7115 | 165.8216 |
| 26180 | LOC103221 | 32.82877 | -0.02691 | 0.454021 | -0.05927 | 0.952734 | 0.967473 | 28.18849 | 42.15071 | 29.22072 | 29.01765 | 34.22577 | 34.1693  |
| 24650 | EIF5      | 11422.12 | -0.02693 | 0.087688 | -0.30714 | 0.75874  | 0.8183   | 11201.13 | 12421.32 | 10964.03 | 11278.94 | 11251.72 | 11415.56 |
| 25484 | PIEZO2    | 675.5564 | -0.02714 | 0.162064 | -0.16746 | 0.86701  | 0.904467 | 594.6687 | 826.0444 | 625.4625 | 604.9064 | 720.8803 | 681.3761 |
| 26332 | LOC103232 | 11.36723 | -0.02714 | 0.736162 | -0.03687 | 0.970592 | 0.979926 | 12.46799 | 12.04306 | 9.740239 | 8.928508 | 14.97377 | 10.04979 |
| 25190 | RNPC3     | 951.1454 | -0.0272  | 0.125842 | -0.21612 | 0.828891 | 0.874795 | 913.9576 | 1057.052 | 912.7996 | 874.9938 | 939.0696 | 1008.999 |
| 24931 | PPP1R18   | 3071.483 | -0.02731 | 0.105751 | -0.25823 | 0.796232 | 0.849068 | 2937.024 | 3405.996 | 2963.12  | 2993.282 | 2881.382 | 3248.094 |
| 25940 | LOC119618 | 98.13424 | -0.02738 | 0.280097 | -0.09776 | 0.922127 | 0.945055 | 103.5385 | 89.22813 | 105.7512 | 73.66019 | 109.0946 | 107.5328 |
| 25107 | CLK3      | 2253.451 | -0.0274  | 0.119721 | -0.22884 | 0.818989 | 0.867202 | 2083.238 | 2597.469 | 2147.723 | 2160.699 | 2132.693 | 2398.886 |
| 24705 | SUCLG2    | 3626.296 | -0.02741 | 0.092021 | -0.29789 | 0.76579  | 0.824065 | 3634.147 | 3872.391 | 3477.961 | 3566.939 | 3506.002 | 3700.334 |
| 24879 | API5      | 6025.398 | -0.02756 | 0.102235 | -0.26958 | 0.78748  | 0.841445 | 5826.344 | 6819.109 | 5604.116 | 5926.297 | 5895.389 | 6081.131 |
| 24905 | IL10RB    | 1341.444 | -0.02759 | 0.104623 | -0.26368 | 0.792023 | 0.84545  | 1421.893 | 1355.939 | 1285.016 | 1337.044 | 1309.136 | 1339.638 |
| 25239 | ANGEL1    | 2224.148 | -0.02773 | 0.132385 | -0.20947 | 0.83408  | 0.878562 | 2463.783 | 1949.333 | 2330.7   | 2024.539 | 2044.99  | 2531.543 |
| 25577 | CRADD     | 323.6183 | -0.0278  | 0.179732 | -0.15467 | 0.877085 | 0.911651 | 352.8982 | 279.7274 | 350.6486 | 294.6408 | 308.0319 | 355.7627 |
| 25271 | ZNF32     | 983.3744 | -0.0278  | 0.136497 | -0.20369 | 0.838598 | 0.882202 | 1109.109 | 836.9927 | 1033.161 | 953.1182 | 983.9909 | 983.8749 |
| 24902 | RAB22A    | 3470.575 | -0.02796 | 0.105561 | -0.26483 | 0.791141 | 0.84461  | 3358.225 | 3923.848 | 3230.281 | 3363.815 | 3493.168 | 3454.114 |
| 26089 | LOC119621 | 43.6147  | -0.02807 | 0.386092 | -0.07271 | 0.942033 | 0.959943 | 42.82482 | 47.07742 | 41.74388 | 51.33892 | 38.50399 | 40.19918 |
| 26382 | TRNAK-CU  | 7.943275 | -0.02808 | 0.92007  | -0.03052 | 0.975655 | 0.983125 | 9.215468 | 7.663765 | 7.653045 | 8.928508 | 2.139111 | 12.05975 |
| 24912 | ETFB      | 2060.008 | -0.0282  | 0.107625 | -0.26206 | 0.793275 | 0.846549 | 2180.271 | 1897.329 | 2165.812 | 2087.039 | 1908.087 | 2121.512 |
| 25968 | LOC119621 | 79.68093 | -0.02842 | 0.30396  | -0.09351 | 0.925497 | 0.94752  | 77.51835 | 75.54283 | 89.74935 | 60.26743 | 85.56443 | 89.44317 |
| 25052 | PICG      | 716.4612 | -0.02842 | 0.119762 | -0.23734 | 0.812392 | 0.862036 | 733.9849 | 711.0879 | 727.735  | 691.9594 | 697.3501 | 736.65   |
| 25166 | DMAP1     | 1117.073 | -0.02843 | 0.129326 | -0.21981 | 0.826021 | 0.872597 | 1192.59  | 1022.018 | 1174.395 | 1124.992 | 975.4345 | 1213.01  |
| 25632 | RNF32     | 233.6703 | -0.02853 | 0.196479 | -0.14523 | 0.884533 | 0.91742  | 215.7504 | 247.9776 | 243.506  | 200.8914 | 273.8062 | 220.0905 |
| 25130 | FAM217B   | 1051.324 | -0.0286  | 0.12617  | -0.22667 | 0.820683 | 0.868199 | 1024.543 | 1186.789 | 973.3282 | 1102.671 | 975.4345 | 1045.179 |
| 24952 | SMIM10L1  | 1907.759 | -0.02862 | 0.112596 | -0.25417 | 0.799365 | 0.85168  | 1916.275 | 2123.958 | 1737.241 | 1979.897 | 1846.053 | 1843.132 |
| 26309 | GPR83     | 11.80418 | -0.02868 | 0.721611 | -0.03974 | 0.968299 | 0.978457 | 11.38381 | 14.78012 | 9.740239 | 11.16063 | 10.69555 | 13.06473 |
| 25363 | SLC9A1    | 441.829  | -0.02881 | 0.152958 | -0.18835 | 0.850603 | 0.89155  | 400.0597 | 478.9853 | 461.2699 | 401.7829 | 455.6306 | 453.2457 |
| 25728 | GALK1     | 577.619  | -0.02885 | 0.220985 | -0.13057 | 0.896114 | 0.925964 | 730.7324 | 374.4297 | 646.3344 | 604.9064 | 496.2737 | 613.0375 |
| 24959 | ETV3      | 1771.462 | -0.02887 | 0.113961 | -0.2533  | 0.800035 | 0.852146 | 1638.185 | 1982.178 | 1749.764 | 1765.612 | 1659.95  | 1833.083 |
| 24841 | GATB      | 1537.505 | -0.02895 | 0.105347 | -0.27482 | 0.783456 | 0.83846  | 1545.488 | 1539.869 | 1578.614 | 1522.311 | 1409.674 | 1629.072 |
| 26006 | GNG14     | 59.27791 | -0.02904 | 0.338663 | -0.08574 | 0.93167  | 0.952422 | 59.08741 | 58.02565 | 61.22436 | 69.19594 | 59.8951  | 48.23901 |
| 24816 | INTS4     | 2429.046 | -0.02909 | 0.104669 | -0.2779  | 0.78109  | 0.83677  | 2443.725 | 2631.409 | 2288.26  | 2450.875 | 2237.51  | 2522.498 |
| 25796 | LOC119621 | 190.3142 | -0.0293  | 0.243605 | -0.12026 | 0.904276 | 0.931898 | 218.4608 | 144.5167 | 216.3725 | 158.481  | 183.9635 | 220.0905 |
| 25255 | ZBTB48    | 744.8072 | -0.02935 | 0.141855 | -0.20693 | 0.836067 | 0.880096 | 823.4292 | 683.7174 | 754.8685 | 718.7449 | 660.9852 | 827.0981 |
| 25518 | LOC103221 | 274.5569 | -0.02947 | 0.181545 | -0.16232 | 0.871056 | 0.907478 | 295.4371 | 246.3353 | 289.4243 | 303.5693 | 250.2759 | 262.2996 |
| 24835 | ZC3H4     | 1950.732 | -0.02952 | 0.106992 | -0.27589 | 0.782632 | 0.83778  | 1827.915 | 2137.643 | 1948.048 | 1979.897 | 1831.079 | 1979.81  |
| 24659 | CHM       | 3455.296 | -0.02961 | 0.09661  | -0.3065  | 0.759227 | 0.818556 | 3418.397 | 3765.646 | 3287.331 | 3325.869 | 3531.672 | 3402.86  |
| 25214 | SUPT3H    | 482.6377 | -0.02963 | 0.139872 | -0.21187 | 0.832209 | 0.87746  | 493.8407 | 480.0802 | 491.1863 | 488.8358 | 436.3786 | 505.5047 |
| 24769 | NOP9      | 1687.714 | -0.02973 | 0.103629 | -0.28687 | 0.774209 | 0.830973 | 1716.245 | 1741.864 | 1661.407 | 1540.168 | 1704.871 | 1761.729 |
| 26419 | LOC103221 | 4.986717 | -0.0298  | 1.194815 | -0.02494 | 0.980102 | 0.98626  | 5.96295  | 6.02153  | 3.478657 | 0        | 6.417332 | 8.039836 |
| 26392 | LOC119621 | 6.452657 | -0.02986 | 1.026099 | -0.0291  | 0.976787 | 0.98393  | 2.168345 | 7.663765 | 9.740239 | 6.696381 | 6.417332 | 6.029877 |
| 26302 | LOC103221 | 14.04438 | -0.02995 | 0.732805 | -0.04088 | 0.967394 | 0.977787 | 17.34676 | 14.78012 | 11.1317  | 15.62489 | 4.278221 | 21.10457 |
| 24820 | PHF23     | 2149.861 | -0.03016 | 0.108704 | -0.27746 | 0.781431 | 0.836966 | 2114.137 | 2386.716 | 2019.012 | 2012.146 | 2139.111 | 2229.044 |
| 25943 | LOC119621 | 89.83701 | -0.03022 | 0.311442 | -0.09703 | 0.922704 | 0.945538 | 113.8381 | 65.68942 | 93.228   | 91.51721 | 81.28621 | 93.46309 |
| 25293 | KRT222    | 428.6921 | -0.03024 | 0.151251 | -0.1999  | 0.841558 | 0.884546 | 411.4436 | 453.8044 | 430.6577 | 439.729  | 455.6306 | 380.8872 |
| 25691 | LOC103221 | 157.2785 | -0.0304  | 0.223565 | -0.13596 | 0.891855 | 0.92289  | 158.2892 | 162.0339 | 155.8438 | 185.2665 | 130.4858 | 151.7519 |
| 26151 | LOC103232 | 31.20489 | -0.03047 | 0.477913 | -0.06375 | 0.949167 | 0.964919 | 27.6464  | 30.10765 | 36.17803 | 44.64254 | 23.53022 | 25.12449 |
| 24635 | SOC56     | 2125.964 | -0.0306  | 0.09881  | -0.30964 | 0.756838 | 0.816746 | 2088.117 | 2297.487 | 2060.756 | 2118.289 | 2053.546 | 2137.591 |
| 24235 | SNRPN     | 6893.441 | -0.0306  | 0.082812 | -0.36955 | 0.711716 | 0.780737 | 6972.315 | 7102.668 | 6827.908 | 6874.951 | 6549.957 | 7032.846 |
| 25070 | OGG1      | 561.0192 | -0.03069 | 0.130654 | -0.23493 | 0.814263 | 0.863469 | 562.6857 | 595.5841 | 542.6705 | 549.1032 | 558.3079 | 557.7636 |
| 24679 | ACADM     | 3118.915 | -0.0307  | 0.10145  | -0.30259 | 0.7622   | 0.821065 | 3093.687 | 3454.716 | 2906.766 | 3044.621 | 3144.493 | 3069.207 |
| 24810 | PRR14L    | 3684.685 | -0.0308  | 0.110446 | -0.27889 | 0.780332 | 0.83616  | 3689.44  | 4107.778 | 3379.167 | 3616.046 | 3386.212 | 3929.47  |
| 24731 | UBE4A     | 5935.154 | -0.03086 | 0.104948 | -0.29406 | 0.768715 | 0.826343 | 5719.553 | 6655.433 | 5625.684 | 5497.729 | 5833.355 | 6279.112 |
| 24897 | METTL4    | 1193.054 | -0.03089 | 0.116236 | -0.26576 | 0.790425 | 0.843981 | 1215.9   | 1248.099 | 1150.044 | 1122.76  | 1306.997 | 1114.522 |
| 25617 | LOC119618 | 218.5041 | -0.03112 | 0.210357 | -0.14795 | 0.882384 | 0.915727 | 252.0702 | 205.8268 | 202.4578 | 200.8914 | 258.8324 | 190.9461 |
| 24933 | TNRC6A    | 5677.913 | -0.03124 | 0.121466 | -0.25723 | 0.797002 | 0.84981  | 5240.891 | 6774.769 | 5205.462 | 5432.997 | 5439.758 | 5973.598 |
| 25062 | ZBED3     | 1318.452 | -0.03131 | 0.132698 | -0.23598 | 0.813448 | 0.862881 | 1216.442 | 1377.836 | 1409.552 | 1343.74  | 1105.92  | 1457.22  |
|       |           |          |          |          |          |          |          |          |          |          |          |          |          |



|       |           |          |          |          |          |          |          |          |          |          |          |          |          |
|-------|-----------|----------|----------|----------|----------|----------|----------|----------|----------|----------|----------|----------|----------|
| 25016 | ATP6V0A4  | 1055.803 | -0.03158 | 0.12998  | -0.24299 | 0.808012 | 0.85869  | 1016.412 | 1205.401 | 979.5898 | 970.9752 | 1127.311 | 1035.129 |
| 24788 | CUEDC1    | 1910.625 | -0.03165 | 0.111691 | -0.28337 | 0.776891 | 0.833212 | 1875.619 | 2001.885 | 1923.002 | 1924.093 | 1674.924 | 2064.228 |
| 26145 | LOC103235 | 32.0501  | -0.03172 | 0.491475 | -0.06454 | 0.94854  | 0.964503 | 24.93597 | 42.69812 | 28.52499 | 31.24978 | 42.78221 | 22.10955 |
| 26335 | LOC103225 | 7.859306 | -0.03177 | 0.876941 | -0.03622 | 0.971105 | 0.980323 | 6.505036 | 10.40082 | 6.957314 | 6.696381 | 8.556443 | 8.039836 |
| 25234 | NDUF85    | 2300.984 | -0.03183 | 0.151569 | -0.20999 | 0.833677 | 0.878336 | 2617.193 | 1756.097 | 2606.905 | 2133.913 | 2389.387 | 2302.408 |
| 25498 | LOC103235 | 257.6144 | -0.03184 | 0.193759 | -0.16432 | 0.869479 | 0.906572 | 275.3799 | 226.0811 | 283.1627 | 229.9091 | 241.7195 | 289.4341 |
| 25174 | ZNF274    | 461.2452 | -0.03188 | 0.146115 | -0.21822 | 0.82726  | 0.873628 | 445.595  | 477.3431 | 480.0546 | 433.0326 | 429.9612 | 501.4848 |
| 26376 | LOC103235 | 7.903026 | -0.03192 | 1.025366 | -0.03113 | 0.975169 | 0.982899 | 14.09425 | 4.379295 | 6.261582 | 4.464254 | 2.139111 | 16.07967 |
| 25057 | EID2      | 673.1051 | -0.03193 | 0.134888 | -0.2367  | 0.812888 | 0.862424 | 688.9918 | 732.9844 | 622.6796 | 624.9956 | 652.4288 | 716.5504 |
| 24740 | TTI1      | 2144.733 | -0.03197 | 0.10963  | -0.29157 | 0.770613 | 0.82811  | 2210.086 | 2122.316 | 2180.422 | 2095.967 | 1905.948 | 2353.662 |
| 24733 | ABHD10    | 1144.444 | -0.03201 | 0.109015 | -0.29362 | 0.769045 | 0.826631 | 1220.236 | 1095.918 | 1156.306 | 1116.063 | 1129.45  | 1148.692 |
| 25106 | CORX17    | 1004.538 | -0.03206 | 0.140017 | -0.22894 | 0.818916 | 0.867176 | 923.1731 | 1162.155 | 956.6306 | 1051.332 | 1054.582 | 879.357  |
| 24693 | VIRMA     | 6761.988 | -0.03207 | 0.106745 | -0.30042 | 0.763853 | 0.82238  | 6631.343 | 7644.059 | 6240.015 | 6595.935 | 6323.211 | 7137.364 |
| 25998 | AQP11     | 54.76309 | -0.03207 | 0.368033 | -0.08714 | 0.930563 | 0.951574 | 62.33993 | 45.98259 | 59.13717 | 40.17829 | 55.61688 | 65.32367 |
| 24979 | FARP2     | 1063.357 | -0.03209 | 0.128466 | -0.2498  | 0.802745 | 0.854356 | 1091.22  | 1146.828 | 992.1129 | 1053.564 | 932.6523 | 1163.766 |
| 24813 | PIGA      | 1779.668 | -0.03222 | 0.115631 | -0.27863 | 0.780532 | 0.836273 | 1704.862 | 2034.73  | 1660.015 | 1734.363 | 1739.097 | 1804.943 |
| 26122 | LCNL1     | 28.29909 | -0.03224 | 0.474955 | -0.06788 | 0.945879 | 0.962644 | 26.56223 | 25.18094 | 34.09084 | 29.01765 | 27.80844 | 27.13445 |
| 25127 | WDFY2     | 613.1847 | -0.03241 | 0.142786 | -0.22699 | 0.820434 | 0.86804  | 623.3993 | 674.9588 | 565.6296 | 573.6566 | 571.1425 | 670.3213 |
| 26377 | KCNIP4    | 6.355587 | -0.03261 | 1.05088  | -0.03103 | 0.975245 | 0.982911 | 7.589209 | 7.663765 | 3.478657 | 6.696381 | 10.69555 | 2.009959 |
| 24848 | ANXA7     | 8734.639 | -0.03268 | 0.119406 | -0.27367 | 0.784336 | 0.839098 | 9863.261 | 7496.805 | 9144.693 | 8747.706 | 7912.57  | 9242.796 |
| 24476 | LOC103225 | 24248.66 | -0.03273 | 0.098042 | -0.33384 | 0.738499 | 0.802132 | 24268.12 | 25442.06 | 23870.54 | 22952.96 | 22216.8  | 26741.5  |
| 26400 | TRNAL-AA  | 7.118541 | -0.03275 | 1.172455 | -0.02793 | 0.977717 | 0.984531 | 10.84173 | 1.642235 | 9.740239 | 0        | 6.417332 | 14.06971 |
| 24697 | EOGT      | 1462.814 | -0.03277 | 0.109436 | -0.29942 | 0.764619 | 0.823061 | 1430.024 | 1598.442 | 1412.335 | 1372.758 | 1458.873 | 1504.454 |
| 24727 | UQCRH     | 4081.458 | -0.03318 | 0.112688 | -0.29447 | 0.768398 | 0.826102 | 3949.099 | 3802.322 | 4629.397 | 4091.489 | 4323.143 | 3693.3   |
| 24853 | POLR2H    | 1223.819 | -0.03337 | 0.122034 | -0.27345 | 0.784504 | 0.839143 | 1303.176 | 1099.203 | 1308.671 | 1290.169 | 1200.041 | 1141.657 |
| 24178 | ATAAD1    | 3119.901 | -0.03339 | 0.088449 | -0.37755 | 0.705763 | 0.776024 | 3193.431 | 3230.825 | 3042.433 | 3042.389 | 3155.188 | 3055.138 |
| 25758 | LOC119625 | 194.9665 | -0.03341 | 0.264309 | -0.12639 | 0.899422 | 0.928322 | 158.2892 | 262.7577 | 169.7585 | 156.2489 | 243.8586 | 178.8863 |
| 25328 | HOXB4     | 326.5689 | -0.03345 | 0.171033 | -0.19555 | 0.844963 | 0.886898 | 304.6525 | 357.4599 | 325.6023 | 350.4439 | 335.8404 | 285.4142 |
| 25714 | STS       | 184.5698 | -0.03351 | 0.251861 | -0.13306 | 0.894148 | 0.92444  | 155.5788 | 251.8094 | 153.0609 | 176.338  | 179.6853 | 190.9461 |
| 25233 | SLC2A4RG  | 2234.555 | -0.03352 | 0.159669 | -0.20996 | 0.8337   | 0.878336 | 2599.846 | 1694.24  | 2491.414 | 2178.556 | 1985.095 | 2458.18  |
| 24286 | CUL2      | 2193.917 | -0.03375 | 0.092658 | -0.36424 | 0.715678 | 0.783405 | 2173.224 | 2266.285 | 2222.166 | 2107.128 | 2162.641 | 2232.059 |
| 24608 | FBXL4     | 1006.238 | -0.03397 | 0.107845 | -0.31499 | 0.75277  | 0.813206 | 1012.075 | 1035.156 | 1008.115 | 970.9752 | 1001.104 | 1010.004 |
| 25001 | SYS1      | 570.7928 | -0.03398 | 0.138451 | -0.24543 | 0.806124 | 0.857198 | 620.6889 | 552.8859 | 560.0638 | 595.9779 | 511.2474 | 583.8931 |
| 24506 | WIPI2     | 5706.621 | -0.03399 | 0.102886 | -0.33036 | 0.741128 | 0.804063 | 6107.687 | 5345.476 | 5876.147 | 5381.658 | 5337.081 | 6191.679 |
| 24550 | ARHGEF7   | 2006.931 | -0.03409 | 0.105493 | -0.32316 | 0.746572 | 0.808457 | 1967.231 | 2216.47  | 1910.478 | 1930.79  | 1959.425 | 2057.193 |
| 25019 | ARMC1     | 873.3109 | -0.03436 | 0.141669 | -0.24254 | 0.808362 | 0.858959 | 946.4828 | 735.1741 | 968.4581 | 879.458  | 879.1745 | 831.118  |
| 26250 | LOC119625 | 13.35976 | -0.0345  | 0.712475 | -0.04842 | 0.961384 | 0.973654 | 12.46799 | 10.94824 | 17.39328 | 17.85702 | 6.417332 | 15.07469 |
| 24298 | MED29     | 1991.953 | -0.03453 | 0.095245 | -0.36252 | 0.716966 | 0.784457 | 1991.083 | 1955.355 | 2101.109 | 2006.682 | 1933.756 | 1963.73  |
| 24928 | OLFML2B   | 1452.536 | -0.03455 | 0.133426 | -0.25894 | 0.795685 | 0.848575 | 1350.879 | 1733.106 | 1328.151 | 1381.687 | 1396.839 | 1524.554 |
| 24858 | UBE2L3    | 5111.95  | -0.03459 | 0.127026 | -0.27233 | 0.785368 | 0.839931 | 4606.65  | 6238.852 | 4674.619 | 5111.571 | 4881.451 | 5158.56  |
| 25501 | ZNF773    | 182.7483 | -0.03468 | 0.211822 | -0.16372 | 0.869949 | 0.906929 | 192.4407 | 195.9734 | 167.6713 | 151.7846 | 194.6591 | 193.961  |
| 24542 | STIP1     | 8112.779 | -0.03472 | 0.107265 | -0.32372 | 0.746147 | 0.808165 | 7738.283 | 9280.272 | 7616.867 | 7741.016 | 7747.859 | 8552.375 |
| 24593 | CCND1     | 10056.46 | -0.03475 | 0.10937  | -0.31773 | 0.75069  | 0.811495 | 9505.484 | 11617.17 | 9413.245 | 9928.501 | 9369.305 | 10505.05 |
| 24077 | GOLPH3    | 4692.991 | -0.03483 | 0.088476 | -0.39362 | 0.693865 | 0.766225 | 4670.616 | 4996.228 | 4583.478 | 4468.718 | 4729.574 | 4709.334 |
| 25488 | LOC119625 | 228.3122 | -0.03499 | 0.210287 | -0.16637 | 0.867863 | 0.905216 | 228.7604 | 273.1585 | 190.6304 | 249.9982 | 203.2155 | 224.1104 |
| 24212 | SLC39A1   | 7930.136 | -0.03505 | 0.094344 | -0.37154 | 0.710233 | 0.77981  | 8039.141 | 8366.642 | 7678.787 | 7964.229 | 7191.69  | 8340.325 |
| 25430 | LOC103245 | 291.2847 | -0.0352  | 0.200187 | -0.17585 | 0.860411 | 0.89949  | 275.922  | 363.4814 | 244.8974 | 303.5693 | 267.3888 | 292.449  |
| 25497 | SLC23A3   | 163.0599 | -0.03524 | 0.214564 | -0.16426 | 0.869526 | 0.906572 | 160.4576 | 169.6977 | 163.4969 | 154.0168 | 183.9635 | 146.727  |
| 24237 | TOMM70    | 5637.453 | -0.03525 | 0.095435 | -0.36938 | 0.711846 | 0.780775 | 5520.608 | 6232.284 | 5367.568 | 5415.14  | 5595.914 | 5693.209 |
| 26226 | IGLON5    | 17.42255 | -0.03536 | 0.680994 | -0.05192 | 0.958589 | 0.971711 | 10.29964 | 21.89647 | 20.17621 | 11.16063 | 29.94755 | 11.05477 |
| 25664 | ABC89     | 163.4652 | -0.03536 | 0.252069 | -0.14029 | 0.888434 | 0.920317 | 208.1612 | 131.9262 | 157.931  | 136.1597 | 164.7115 | 181.9013 |
| 24711 | PPP2R3C   | 953.1561 | -0.03537 | 0.119172 | -0.2968  | 0.766616 | 0.824754 | 981.1763 | 932.7897 | 976.8068 | 919.6363 | 1033.19  | 875.3371 |
| 24530 | RANGAP1   | 4030.636 | -0.03542 | 0.108739 | -0.32571 | 0.744643 | 0.807045 | 4367.59  | 3805.06  | 4073.507 | 4046.846 | 3557.341 | 4333.471 |
| 25079 | CHST3     | 607.06   | -0.03548 | 0.151808 | -0.23373 | 0.815197 | 0.86415  | 627.736  | 554.5282 | 664.4235 | 640.6204 | 504.8301 | 650.2217 |
| 24805 | PPDPF     | 801.3977 | -0.03549 | 0.126879 | -0.27972 | 0.77969  | 0.835641 | 780.0623 | 835.3504 | 823.0502 | 790.173  | 714.463  | 865.2873 |
| 24794 | SLC66A3   | 229.9955 | -0.03562 | 0.126249 | -0.28212 | 0.777851 | 0.84039  | 2523.954 | 1923.058 | 2538.028 | 2299.091 | 2267.457 | 2248.139 |
| 25556 | LOC103215 | 196.2022 | -0.03567 | 0.227309 | -0.15692 | 0.875307 | 0.910551 | 169.1309 | 244.6931 | 180.1944 | 196.4272 | 213.9111 | 172.8565 |
| 24846 | ST6GALNA  | 4165.093 | -0.03572 | 0.130346 | -0.27401 | 0.78408  | 0.838962 | 4718.32  | 3474.97  | 4461.03  | 4120.506 | 3745.583 | 4470.149 |
| 24699 | MED30     | 856.49   | -0.03573 | 0.119416 | -0.29924 | 0.764754 | 0.82315  | 893.9004 | 803.6005 | 902.3636 | 852.6725 | 866.3398 | 820.0632 |
| 25685 | TRNAS-GCI | 149.9826 | -0.03576 | 0.261372 | -0.13684 | 0.891161 | 0.922387 | 145.2791 | 159.2968 | 150.9737 | 194.195  | 98.39909 | 151.7519 |
| 24982 | NDUFV1    | 4471.182 | -0.03579 | 0.144023 | -0.24848 | 0.803762 | 0.855337 | 5099.949 | 3673.133 | 4812.374 | 4448.629 | 3769.113 | 5023.892 |
| 24279 | STK17A    | 2124.761 | -0.0358  | 0.098067 | -0.36505 | 0.715074 | 0.782992 | 2171.598 | 2174.867 | 2102.5   | 2066.95  | 2241.788 | 1990.864 |
| 24401 | UMPS      | 1489.49  | -0.03589 | 0.103539 | -0.3466  | 0.728889 | 0.794156 | 1568.256 | 1434.219 | 1522.956 | 1506.686 | 1405.396 | 1499.429 |
| 25859 | LOC119625 | 62.56625 | -0.03596 | 0.326216 | -0.11022 | 0.912233 | 0.937844 | 68.84497 | 63.49977 | 57.04997 | 60.26743 | 68.45154 | 57.28383 |
| 24366 | FAM8A1    | 1922.868 | -0.03609 | 0.102649 | -0.35163 | 0.725114 | 0.791149 | 1876.161 | 2076.88  | 1891.694 | 1834.808 | 1856.748 | 2000.914 |
| 25002 | CMC1      | 1019.124 | -0.03633 | 0.148045 | -0.24537 | 0.806171 | 0.857213 | 1116.156 | 822.76   | 1157.697 | 1017.85  | 988.2691 | 1012.014 |
| 26032 | LOC103235 | 31.17256 | -0.03639 | 0.450803 | -0.08071 | 0.93567  | 0.955546 | 35.23561 | 27.918   | 31.30791 | 33.4819  | 29.94755 | 29.1444  |
| 24619 | DENND2B   | 5315.187 | -0.03649 | 0.116613 | -0.31288 | 0.754372 | 0.814597 | 5084.228 | 6190.133 | 4877.077 | 5089.25  | 4971.293 | 5679.139 |
| 24646 | CBFA2T2   | 1158.112 | -0.0367  | 0.119149 | -0.30802 | 0.758064 | 0.817704 | 1173.617 | 1236.056 | 1114.562 | 1066.957 | 1095.225 | 1262.254 |
| 25093 | RNF111    | 1286.072 | -0.03684 | 0.158921 | -0.23182 | 0.816675 | 0.865233 | 1084.715 | 1650.447 | 1170.916 | 1267.848 | 1313     |          |



|       |           |          |          |          |          |          |          |          |          |          |          |          |          |
|-------|-----------|----------|----------|----------|----------|----------|----------|----------|----------|----------|----------|----------|----------|
| 26324 | LOC103230 | 6.857129 | -0.0371  | 0.978197 | -0.03793 | 0.969743 | 0.979358 | 8.673382 | 6.568942 | 5.565851 | 11.16063 | 2.139111 | 7.034856 |
| 26264 | LOC119625 | 10.82607 | -0.0373  | 0.818119 | -0.0456  | 0.963632 | 0.97541  | 8.131296 | 12.59047 | 11.82743 | 20.08914 | 4.278221 | 8.039836 |
| 26031 | LOC119626 | 36.87706 | -0.03733 | 0.461544 | -0.08088 | 0.935538 | 0.955448 | 46.61943 | 43.24553 | 22.2634  | 35.71403 | 34.22577 | 39.1942  |
| 24218 | LOC103234 | 5607.818 | -0.03739 | 0.100763 | -0.37111 | 0.710554 | 0.780002 | 5656.671 | 5625.204 | 5767.613 | 5542.371 | 4964.876 | 6090.176 |
| 24927 | PPP1R11   | 1535.648 | -0.03747 | 0.144629 | -0.25909 | 0.795565 | 0.848482 | 1363.889 | 1895.687 | 1408.856 | 1542.4   | 1401.117 | 1601.937 |
| 25961 | LOC119620 | 50.46307 | -0.03761 | 0.399952 | -0.09403 | 0.925084 | 0.947283 | 68.84497 | 38.31883 | 45.22254 | 53.57105 | 55.61688 | 41.20416 |
| 24431 | HRAS      | 1816.844 | -0.03771 | 0.110914 | -0.34003 | 0.733836 | 0.798536 | 1962.353 | 1668.511 | 1895.172 | 1707.577 | 1769.045 | 1898.406 |
| 24997 | MRPS31    | 979.8695 | -0.0378  | 0.153714 | -0.24593 | 0.805733 | 0.856919 | 885.7691 | 1217.444 | 873.1429 | 1035.707 | 930.5131 | 936.6409 |
| 26351 | TRNAN-GL  | 5.68301  | -0.03805 | 1.10716  | -0.03437 | 0.972583 | 0.98122  | 10.84173 | 2.737059 | 3.478657 | 4.464254 | 8.556443 | 4.019918 |
| 24661 | NCBP3     | 1670.115 | -0.03846 | 0.125606 | -0.30622 | 0.75944  | 0.81869  | 1567.172 | 1954.26  | 1558.438 | 1551.328 | 1642.837 | 1746.654 |
| 26291 | CLDN3     | 8.559822 | -0.03847 | 0.914471 | -0.04207 | 0.966446 | 0.977254 | 8.673382 | 4.379295 | 12.52316 | 8.928508 | 12.83466 | 4.019918 |
| 23732 | SGCE      | 3912.201 | -0.03855 | 0.085996 | -0.44825 | 0.653972 | 0.73259  | 4068.358 | 3865.275 | 3958.016 | 3808.009 | 3978.746 | 3794.802 |
| 25116 | TS8IA4    | 293.1847 | -0.03881 | 0.170276 | -0.22791 | 0.819714 | 0.867647 | 302.4842 | 292.3179 | 299.8602 | 272.3195 | 269.5279 | 322.5984 |
| 25326 | KCND1     | 268.2396 | -0.03892 | 0.198929 | -0.19564 | 0.844894 | 0.886895 | 252.6122 | 323.5204 | 241.4188 | 229.9091 | 269.5279 | 292.449  |
| 25144 | ZNF235    | 277.2838 | -0.03906 | 0.175071 | -0.2231  | 0.823458 | 0.87065  | 268.8748 | 312.0247 | 261.595  | 283.4801 | 267.3888 | 270.3395 |
| 24756 | LOC103246 | 2173.018 | -0.03906 | 0.135183 | -0.28896 | 0.772612 | 0.82975  | 2422.584 | 1899.519 | 2292.435 | 1993.289 | 1953.008 | 2477.274 |
| 24265 | LOC103224 | 1939.35  | -0.03913 | 0.106767 | -0.36649 | 0.713999 | 0.782255 | 2113.595 | 1817.407 | 1968.92  | 1926.326 | 1813.966 | 1995.889 |
| 25509 | LOC119625 | 122.8782 | -0.03913 | 0.240026 | -0.16303 | 0.870494 | 0.907219 | 127.3903 | 125.9047 | 121.0573 | 129.4634 | 104.8164 | 128.6374 |
| 25413 | ISOC2     | 371.6666 | -0.03933 | 0.219771 | -0.17897 | 0.857962 | 0.89753  | 422.2853 | 256.7361 | 452.9211 | 370.5331 | 331.5622 | 395.9619 |
| 23887 | STX7      | 2151.241 | -0.03957 | 0.093273 | -0.42422 | 0.671404 | 0.747238 | 2210.086 | 2156.255 | 2172.073 | 2191.949 | 2136.972 | 2040.108 |
| 24361 | RINT1     | 1204.587 | -0.0396  | 0.112246 | -0.35278 | 0.724255 | 0.790375 | 1267.398 | 1226.202 | 1168.133 | 1118.296 | 1287.745 | 1159.746 |
| 24428 | CUNH11or  | 1487.816 | -0.03961 | 0.116285 | -0.3406  | 0.733408 | 0.798168 | 1410.509 | 1680.007 | 1433.902 | 1533.471 | 1394.7   | 1474.305 |
| 24692 | PCGF6     | 742.5828 | -0.03967 | 0.132015 | -0.30052 | 0.763778 | 0.822332 | 808.7929 | 666.2002 | 782.6978 | 745.5304 | 733.715  | 718.5603 |
| 24397 | ERI2      | 1076.609 | -0.03984 | 0.114754 | -0.34716 | 0.728471 | 0.793803 | 1067.91  | 1180.22  | 1027.595 | 1037.939 | 1054.582 | 1091.408 |
| 24266 | DENND10   | 2705.574 | -0.03985 | 0.10875  | -0.36644 | 0.714037 | 0.782255 | 3009.121 | 2467.185 | 2755.792 | 2642.838 | 2562.655 | 2795.853 |
| 25095 | DHRS7B    | 441.4775 | -0.03987 | 0.172322 | -0.23136 | 0.817034 | 0.865542 | 513.3558 | 388.115  | 445.2681 | 395.0865 | 408.5701 | 498.4698 |
| 25954 | LOC119625 | 42.84057 | -0.04027 | 0.424923 | -0.09477 | 0.924498 | 0.946975 | 46.07734 | 36.67659 | 46.614   | 33.4819  | 62.03421 | 32.15934 |
| 24554 | E2F3      | 945.3192 | -0.0404  | 0.125147 | -0.3228  | 0.746848 | 0.808624 | 944.8565 | 1061.432 | 870.3599 | 930.797  | 902.7047 | 961.7654 |
| 24297 | DPY30     | 1399.885 | -0.04047 | 0.111165 | -0.36251 | 0.716974 | 0.784457 | 1342.206 | 1403.016 | 1510.433 | 1491.061 | 1339.083 | 1313.508 |
| 24007 | PHRF1     | 3521.964 | -0.04048 | 0.099878 | -0.40534 | 0.685227 | 0.75881  | 3571.807 | 3644.12  | 3504.399 | 3513.368 | 3144.493 | 3753.598 |
| 24407 | SIPA1L3   | 2481.717 | -0.04057 | 0.117283 | -0.3459  | 0.729418 | 0.794508 | 2284.352 | 2884.313 | 2383.576 | 2406.233 | 2370.135 | 2561.693 |
| 24377 | CHMP4A    | 1404.036 | -0.04065 | 0.116236 | -0.34975 | 0.726523 | 0.792313 | 1366.6   | 1584.21  | 1318.411 | 1374.99  | 1435.343 | 1344.663 |
| 24865 | BTN2A2    | 472.4065 | -0.04066 | 0.149826 | -0.27141 | 0.786074 | 0.840449 | 441.2583 | 534.8213 | 459.1827 | 484.3716 | 470.6043 | 444.2009 |
| 24421 | TK2       | 1816.633 | -0.04076 | 0.119045 | -0.3424  | 0.732047 | 0.796915 | 1954.763 | 1673.438 | 1904.912 | 1761.148 | 1625.724 | 1979.81  |
| 24916 | MAPK1IP1  | 3153.246 | -0.04082 | 0.156066 | -0.26158 | 0.793643 | 0.846806 | 2671.944 | 4143.907 | 2778.751 | 2991.05  | 3086.737 | 3247.089 |
| 24133 | SLC25A30  | 1469.07  | -0.04089 | 0.106198 | -0.385   | 0.700238 | 0.771408 | 1464.175 | 1547.533 | 1463.123 | 1377.222 | 1409.674 | 1552.693 |
| 24168 | CISD2     | 1904.592 | -0.04118 | 0.10835  | -0.38009 | 0.70388  | 0.774274 | 1924.949 | 1883.097 | 1980.051 | 1993.289 | 1965.843 | 1680.326 |
| 26020 | LOC103225 | 26.98521 | -0.04129 | 0.497224 | -0.08304 | 0.933821 | 0.954098 | 33.06727 | 24.08612 | 25.74206 | 22.32127 | 23.53022 | 33.16432 |
| 23944 | LOC103235 | 11720.08 | -0.04134 | 0.099333 | -0.41621 | 0.677254 | 0.751955 | 11566.5  | 12865.27 | 11237.45 | 11647.24 | 10620.68 | 12383.36 |
| 25249 | ZFPM1     | 240.8547 | -0.04152 | 0.199908 | -0.20769 | 0.835471 | 0.879678 | 200.572  | 276.443  | 255.3334 | 234.3733 | 250.2759 | 228.1303 |
| 24817 | MAP4K4    | 20317.9  | -0.04156 | 0.149564 | -0.27784 | 0.781134 | 0.836777 | 17457.89 | 26735.59 | 17638.88 | 19892.72 | 19329    | 20853.32 |
| 24718 | LOC119625 | 560.4862 | -0.04163 | 0.140686 | -0.29588 | 0.767322 | 0.825324 | 610.9313 | 521.6835 | 576.0656 | 544.639  | 517.6648 | 591.9329 |
| 24200 | TANK      | 1513.604 | -0.04173 | 0.111633 | -0.3738  | 0.708553 | 0.778383 | 1459.297 | 1687.671 | 1456.861 | 1549.096 | 1484.543 | 1444.155 |
| 23271 | EIF3M     | 9055.098 | -0.04193 | 0.080854 | -0.51862 | 0.604023 | 0.690042 | 9177.522 | 9066.234 | 9311.669 | 9013.329 | 9185.341 | 8576.495 |
| 25861 | LOC103248 | 56.99009 | -0.04208 | 0.38242  | -0.11002 | 0.91239  | 0.937935 | 60.17159 | 55.28859 | 59.8329  | 31.24978 | 62.03421 | 73.3635  |
| 24204 | MGA       | 7438.695 | -0.04209 | 0.112684 | -0.37355 | 0.708741 | 0.778461 | 6958.763 | 8780.485 | 6903.047 | 7243.252 | 7266.559 | 7480.062 |
| 24014 | AKAP13    | 14498.03 | -0.04212 | 0.104131 | -0.40453 | 0.685822 | 0.759261 | 14232.48 | 16438.78 | 13462.4  | 13801.24 | 13754.48 | 15298.8  |
| 24662 | ZC2HC1A   | 1092.553 | -0.04215 | 0.13768  | -0.30614 | 0.759499 | 0.81872  | 998.5231 | 1305.03  | 1023.421 | 1017.85  | 1090.946 | 1119.547 |
| 23407 | LAPTM4A   | 8198.306 | -0.04231 | 0.084995 | -0.49785 | 0.618587 | 0.702573 | 8412.096 | 8045.859 | 8503.925 | 7792.355 | 7942.518 | 8493.081 |
| 23672 | EEF1D     | 12566.72 | -0.04233 | 0.092374 | -0.45827 | 0.646758 | 0.726346 | 13488.74 | 11610.06 | 13157.67 | 12196.34 | 12199.35 | 12748.16 |
| 25126 | AMIGO1    | 227.0086 | -0.04236 | 0.186463 | -0.22716 | 0.820297 | 0.86793  | 238.518  | 243.0508 | 210.1109 | 225.4448 | 211.772  | 233.1552 |
| 23544 | RAP2A     | 4446.11  | -0.04249 | 0.088973 | -0.47752 | 0.632989 | 0.714747 | 4324.765 | 4777.81  | 4433.896 | 4359.344 | 4316.725 | 4464.119 |
| 25629 | LOC119624 | 118.5489 | -0.04254 | 0.291801 | -0.14579 | 0.884086 | 0.917064 | 99.74389 | 143.4219 | 114.7957 | 136.1597 | 134.764  | 82.40832 |
| 23466 | SNURF     | 3273.11  | -0.04258 | 0.086912 | -0.48987 | 0.624226 | 0.707195 | 3392.376 | 3354.54  | 3217.758 | 3243.281 | 3176.579 | 3254.124 |
| 24112 | HYOU1     | 12492.08 | -0.0428  | 0.110147 | -0.38855 | 0.697611 | 0.769122 | 12323.25 | 14064.65 | 11650.72 | 11990.99 | 11292.37 | 13630.54 |
| 24631 | GIGYF2    | 6439.642 | -0.04288 | 0.138111 | -0.31049 | 0.756187 | 0.816176 | 5880.011 | 8068.303 | 5660.47  | 6227.634 | 5942.449 | 6858.985 |
| 26184 | LOC103248 | 11.81384 | -0.04306 | 0.736437 | -0.05847 | 0.953372 | 0.967973 | 15.7205  | 8.758589 | 11.1317  | 13.39276 | 12.83466 | 9.044815 |
| 24606 | ALG3      | 907.9331 | -0.04307 | 0.136645 | -0.31523 | 0.752591 | 0.81312  | 855.4123 | 1021.47  | 891.2319 | 921.8684 | 780.7754 | 976.84   |
| 26224 | LOC103225 | 9.33001  | -0.04309 | 0.824666 | -0.05225 | 0.958326 | 0.971518 | 11.38381 | 11.49565 | 5.565851 | 8.928508 | 8.556443 | 10.04979 |
| 23795 | NR2C1     | 1706.158 | -0.04314 | 0.098763 | -0.43684 | 0.662226 | 0.739748 | 1746.602 | 1793.869 | 1655.841 | 1638.381 | 1687.758 | 1714.495 |
| 24375 | CHD6      | 4021.916 | -0.04315 | 0.123239 | -0.3501  | 0.726267 | 0.792115 | 3712.207 | 4797.517 | 3739.556 | 3926.311 | 3719.913 | 4235.988 |
| 23867 | ZYG11B    | 3093.261 | -0.0432  | 0.101101 | -0.42733 | 0.669143 | 0.745314 | 3224.33  | 3136.122 | 3065.392 | 2999.979 | 2802.235 | 3331.507 |
| 24054 | PTPN2     | 2543.167 | -0.04336 | 0.10911  | -0.3974  | 0.69107  | 0.763786 | 2348.86  | 2824.098 | 2567.944 | 2470.965 | 2665.332 | 2381.801 |
| 25353 | FAM167A   | 165.1486 | -0.04344 | 0.229507 | -0.18926 | 0.849892 | 0.891157 | 144.7371 | 201.4475 | 157.2353 | 151.7846 | 166.8506 | 168.8366 |
| 24259 | LRRCS7    | 728.4462 | -0.04345 | 0.118261 | -0.3674  | 0.713317 | 0.781712 | 738.3216 | 735.7215 | 745.824  | 696.4236 | 718.7412 | 735.645  |
| 26223 | LOC103225 | 9.386079 | -0.04346 | 0.830224 | -0.05235 | 0.958253 | 0.971482 | 8.131296 | 7.116354 | 13.2189  | 13.39276 | 6.417332 | 8.039836 |
| 24295 | PCF11     | 6343.579 | -0.04349 | 0.119842 | -0.36291 | 0.716676 | 0.784228 | 5863.206 | 7625.447 | 5830.229 | 6158.438 | 6122.135 | 6462.018 |
| 24460 | SIPA1L1   | 1309.464 | -0.04356 | 0.129415 | -0.33661 | 0.736411 | 0.800388 | 1234.331 | 1530.016 | 1226.574 | 1223.206 | 1257.797 | 1384.862 |
| 24350 | CBY1      | 672.5542 | -0.0437  | 0.123378 | -0.35418 | 0.7232   | 0.78958  | 687.3655 | 695.7604 | 663.7277 | 698.6557 | 639.5941 | 650.2217 |
| 24866 | KLHL17    | 748.2599 | -0.04389 | 0.162118 | -0.27074 | 0.786595 | 0.840972 | 788.1936 | 634.9977 | 858.5325 | 799.1015 | 611      |          |



|       |           |          |          |          |          |          |          |          |          |          |          |          |          |
|-------|-----------|----------|----------|----------|----------|----------|----------|----------|----------|----------|----------|----------|----------|
| 23587 | FLOT1     | 2832.647 | -0.04437 | 0.094288 | -0.47056 | 0.637954 | 0.719041 | 2748.378 | 3063.317 | 2817.712 | 2736.588 | 2812.931 | 2816.957 |
| 23705 | PSMC1     | 5597.825 | -0.04439 | 0.098006 | -0.4529  | 0.650624 | 0.72964  | 5520.065 | 6247.064 | 5285.471 | 5325.855 | 5608.748 | 5599.746 |
| 26061 | LOC103221 | 20.07036 | -0.04444 | 0.584473 | -0.07603 | 0.939397 | 0.958279 | 14.09425 | 27.37059 | 19.48048 | 17.85702 | 23.53022 | 18.08963 |
| 24121 | PIK3CA    | 2600.937 | -0.04465 | 0.115279 | -0.38735 | 0.698494 | 0.769848 | 2520.16  | 3008.028 | 2396.795 | 2435.251 | 2603.298 | 2642.091 |
| 26050 | LOC119615 | 20.46187 | -0.04467 | 0.573502 | -0.07789 | 0.937919 | 0.957195 | 25.47806 | 14.23271 | 22.2634  | 22.32127 | 21.39111 | 17.08465 |
| 26100 | LOC103224 | 16.77456 | -0.04483 | 0.635905 | -0.07049 | 0.943802 | 0.96134  | 18.43094 | 14.23271 | 18.08902 | 11.16063 | 25.66933 | 13.06473 |
| 25572 | LOC119621 | 124.0443 | -0.04483 | 0.288842 | -0.15519 | 0.876668 | 0.911427 | 155.5788 | 95.79707 | 128.0146 | 89.28508 | 136.9031 | 138.6872 |
| 23961 | LOC103241 | 1091.121 | -0.04483 | 0.108556 | -0.41299 | 0.679611 | 0.754023 | 1112.903 | 1099.75  | 1112.474 | 1120.528 | 1009.66  | 1091.408 |
| 24580 | LOC103223 | 516.0255 | -0.04492 | 0.140743 | -0.31913 | 0.749627 | 0.810774 | 564.3119 | 481.7224 | 526.6686 | 522.3177 | 485.5781 | 515.5545 |
| 25614 | NME5      | 74.6312  | -0.04517 | 0.304425 | -0.14837 | 0.882055 | 0.915478 | 71.5554  | 73.90059 | 80.70484 | 75.89232 | 83.42532 | 62.30873 |
| 23898 | DNM1L     | 5802.42  | -0.04528 | 0.107066 | -0.42296 | 0.672324 | 0.74791  | 5688.654 | 6680.614 | 5310.518 | 5803.53  | 5593.774 | 5737.428 |
| 24851 | SLFN12    | 283.3686 | -0.04541 | 0.16597  | -0.27359 | 0.784401 | 0.839109 | 281.3428 | 287.9386 | 295.6858 | 267.8552 | 275.9453 | 291.444  |
| 25934 | LOC119622 | 43.89814 | -0.0455  | 0.458354 | -0.09926 | 0.920928 | 0.944009 | 62.33993 | 23.53871 | 48.00546 | 44.64254 | 40.6431  | 44.2191  |
| 24665 | RMI1      | 538.3031 | -0.04557 | 0.149033 | -0.30577 | 0.759783 | 0.818927 | 532.8709 | 612.0064 | 498.1437 | 486.6037 | 528.3603 | 571.8333 |
| 23130 | LOC103222 | 11583.75 | -0.04562 | 0.084519 | -0.53974 | 0.589375 | 0.677411 | 11855.97 | 11200.05 | 12240.7  | 11562.42 | 11688.1  | 10955.28 |
| 24197 | YY1AP1    | 1982.26  | -0.04565 | 0.122052 | -0.37403 | 0.708382 | 0.778292 | 1888.629 | 2332.522 | 1820.729 | 1950.879 | 1888.835 | 2011.969 |
| 24456 | DNAJC1    | 956.2373 | -0.04587 | 0.136078 | -0.33705 | 0.736077 | 0.800156 | 877.6378 | 1133.142 | 903.0593 | 933.0291 | 951.9042 | 938.6508 |
| 24417 | NUDT9     | 786.6661 | -0.04587 | 0.133343 | -0.34381 | 0.730992 | 0.795898 | 747.5371 | 903.7769 | 745.1283 | 805.7978 | 752.967  | 764.7894 |
| 24257 | RELA      | 1747.444 | -0.04589 | 0.124814 | -0.36768 | 0.713113 | 0.781537 | 1638.727 | 1996.411 | 1696.193 | 1645.078 | 1595.777 | 1912.476 |
| 23977 | DRAM2     | 2195.66  | -0.04605 | 0.112274 | -0.41019 | 0.681664 | 0.75578  | 2052.881 | 2509.883 | 2126.851 | 2216.502 | 2175.476 | 2092.367 |
| 24135 | RAP1A     | 1598.645 | -0.04614 | 0.119922 | -0.38472 | 0.700448 | 0.77158  | 1417.556 | 1799.89  | 1655.841 | 1595.971 | 1533.742 | 1588.873 |
| 23660 | ZNF445    | 2523.027 | -0.04618 | 0.100218 | -0.46083 | 0.644919 | 0.724648 | 2598.762 | 2663.158 | 2433.668 | 2339.269 | 2447.143 | 2656.161 |
| 25450 | LOC103243 | 100.8952 | -0.04634 | 0.269069 | -0.17223 | 0.863256 | 0.901755 | 102.9964 | 116.0513 | 88.35788 | 91.51721 | 106.9555 | 99.49297 |
| 24110 | ZFPL1     | 1296.871 | -0.04635 | 0.119214 | -0.38878 | 0.697436 | 0.769011 | 1205.6   | 1467.611 | 1280.146 | 1319.187 | 1219.293 | 1289.389 |
| 23911 | DCTN4     | 4696.974 | -0.04636 | 0.11009  | -0.42107 | 0.673701 | 0.749023 | 4376.805 | 5410.071 | 4534.081 | 4511.129 | 4451.489 | 4898.27  |
| 23784 | ATP5F1C   | 5686.968 | -0.04639 | 0.105739 | -0.43876 | 0.660836 | 0.738662 | 6067.031 | 5038.378 | 6230.97  | 5660.674 | 5486.819 | 5637.935 |
| 26190 | LOC119621 | 10.02376 | -0.04659 | 0.801538 | -0.05813 | 0.953644 | 0.968057 | 10.29964 | 13.6853  | 6.261582 | 11.16063 | 10.69555 | 8.039836 |
| 23937 | CNIH1     | 3712.349 | -0.04666 | 0.111752 | -0.4175  | 0.676311 | 0.751112 | 3998.971 | 3242.32  | 4075.594 | 3674.081 | 3679.27  | 3603.856 |
| 24252 | LOC119622 | 1007.433 | -0.04668 | 0.126837 | -0.36803 | 0.71285  | 0.781425 | 1064.116 | 1057.6   | 955.2392 | 906.2436 | 951.9042 | 1109.497 |
| 26217 | LOC103246 | 7.961808 | -0.04702 | 0.881105 | -0.05337 | 0.957441 | 0.970881 | 8.131296 | 7.116354 | 9.044508 | 11.16063 | 4.278221 | 8.039836 |
| 24301 | GEMIN8    | 550.4992 | -0.04703 | 0.130112 | -0.36145 | 0.717763 | 0.785233 | 569.1907 | 550.1489 | 560.7595 | 540.1747 | 521.943  | 560.7785 |
| 24980 | ZKSCAN4   | 225.4779 | -0.04703 | 0.188494 | -0.24952 | 0.802961 | 0.854552 | 247.1914 | 206.9217 | 232.3743 | 225.4448 | 228.8848 | 212.0507 |
| 24346 | CHP1      | 3453.506 | -0.04717 | 0.13288  | -0.35497 | 0.722613 | 0.789073 | 3146.269 | 4213.976 | 3173.231 | 3147.299 | 3351.986 | 3688.275 |
| 23382 | CDS2      | 7639.373 | -0.04719 | 0.094094 | -0.50148 | 0.616031 | 0.700389 | 7896.03  | 7992.212 | 7412.322 | 7160.663 | 7204.525 | 8170.483 |
| 24153 | SCOC      | 2783.414 | -0.04738 | 0.123896 | -0.38241 | 0.70216  | 0.772861 | 3044.357 | 2357.703 | 3084.177 | 2694.177 | 2874.965 | 2645.106 |
| 23422 | NUP62CL   | 1859.942 | -0.04749 | 0.095769 | -0.49592 | 0.619948 | 0.703677 | 1873.45  | 1908.278 | 1886.823 | 1821.416 | 1905.948 | 1763.739 |
| 23611 | FAM50A    | 4552.308 | -0.04752 | 0.101741 | -0.46707 | 0.640452 | 0.721122 | 4437.519 | 5104.615 | 4343.451 | 4352.648 | 4355.229 | 4720.389 |
| 24585 | DHCR7     | 5672.276 | -0.04763 | 0.149411 | -0.31879 | 0.749887 | 0.810894 | 6527.262 | 4644.789 | 6132.872 | 5245.498 | 4849.364 | 6633.869 |
| 24213 | SEMA4F    | 1285.301 | -0.04766 | 0.128284 | -0.37156 | 0.710223 | 0.77981  | 1344.916 | 1214.159 | 1367.808 | 1218.741 | 1123.033 | 1443.151 |
| 24471 | CAMK2N2   | 1106.413 | -0.04774 | 0.142386 | -0.33525 | 0.737434 | 0.801139 | 956.2404 | 1329.116 | 1090.211 | 1095.974 | 1035.33  | 1131.607 |
| 24059 | NDUFS2    | 5376.565 | -0.04779 | 0.120832 | -0.39552 | 0.692457 | 0.765159 | 5913.62  | 4943.676 | 5547.066 | 5252.195 | 4599.088 | 6003.747 |
| 25914 | FAM170A   | 37.87904 | -0.04792 | 0.46664  | -0.1027  | 0.918204 | 0.94198  | 47.7036  | 35.58177 | 31.30791 | 26.78552 | 57.75599 | 28.13943 |
| 24684 | POP7      | 1930.098 | -0.04799 | 0.158937 | -0.30195 | 0.762692 | 0.82143  | 2175.935 | 1439.146 | 2271.563 | 1946.415 | 1880.278 | 1867.252 |
| 26109 | KCNC4     | 12.61442 | -0.04803 | 0.693673 | -0.06924 | 0.944797 | 0.961992 | 11.9259  | 14.78012 | 11.82743 | 13.39276 | 10.69555 | 13.06473 |
| 23964 | ZNF3      | 1432.141 | -0.04813 | 0.11672  | -0.41236 | 0.680079 | 0.754461 | 1467.97  | 1553.007 | 1352.502 | 1330.348 | 1343.361 | 1545.658 |
| 25923 | LOC103231 | 30.87444 | -0.04825 | 0.478963 | -0.10075 | 0.919752 | 0.94324  | 24.93597 | 29.01283 | 39.65669 | 29.01765 | 38.50399 | 24.11951 |
| 23353 | VEZT      | 7721.06  | -0.04835 | 0.095611 | -0.50565 | 0.613099 | 0.697951 | 7603.846 | 8634.874 | 7313.528 | 7517.804 | 7518.974 | 7737.337 |
| 23995 | EEF2K     | 1280.458 | -0.04835 | 0.118746 | -0.40717 | 0.683884 | 0.757702 | 1306.97  | 1386.047 | 1218.226 | 1196.42  | 1187.206 | 1387.877 |
| 23322 | EXTL2     | 1964.23  | -0.04844 | 0.094869 | -0.51063 | 0.609608 | 0.694899 | 2053.423 | 1934.006 | 2005.098 | 1962.04  | 1878.139 | 1952.675 |
| 23901 | DNAJC4    | 1167.296 | -0.0485  | 0.114707 | -0.42282 | 0.672429 | 0.747941 | 1135.671 | 1207.59  | 1222.4   | 1149.545 | 1052.442 | 1236.125 |
| 24463 | ABHD3     | 482.7838 | -0.04851 | 0.144349 | -0.33606 | 0.736826 | 0.800736 | 517.1504 | 453.257  | 499.5351 | 499.9964 | 485.5781 | 441.186  |
| 23395 | HMG20A    | 1909.326 | -0.04878 | 0.097604 | -0.49972 | 0.617271 | 0.701442 | 1877.787 | 2045.131 | 1903.521 | 1863.826 | 1848.192 | 1917.501 |
| 25782 | LOC119611 | 53.82232 | -0.04879 | 0.399823 | -0.12203 | 0.902872 | 0.930994 | 39.5723  | 72.80577 | 50.78839 | 49.10679 | 68.45154 | 42.20914 |
| 24774 | SCO2      | 681.711  | -0.0488  | 0.170561 | -0.28613 | 0.774781 | 0.831418 | 765.426  | 566.5712 | 752.7813 | 647.3168 | 573.2817 | 784.889  |
| 24884 | GPR155    | 248.0669 | -0.04882 | 0.181558 | -0.26887 | 0.788029 | 0.841897 | 258.5752 | 264.3999 | 234.4615 | 218.7484 | 260.9715 | 251.2449 |
| 25516 | BDKRB1    | 95.12888 | -0.04925 | 0.302681 | -0.16271 | 0.870749 | 0.907376 | 91.6126  | 119.8832 | 77.22618 | 89.28508 | 113.3729 | 79.39338 |
| 26222 | LOC119621 | 8.548095 | -0.04925 | 0.936555 | -0.05259 | 0.958061 | 0.971323 | 9.215468 | 7.116354 | 9.044508 | 8.928508 | 14.97377 | 2.009959 |
| 24025 | ALMS1     | 3305.138 | -0.0493  | 0.122424 | -0.40273 | 0.687147 | 0.760334 | 3034.599 | 3945.744 | 3107.136 | 3127.21  | 3185.136 | 3431     |
| 26130 | LVRN      | 11.79303 | -0.04935 | 0.742697 | -0.06645 | 0.947022 | 0.963512 | 11.38381 | 14.23271 | 9.740239 | 13.39276 | 14.97377 | 7.034856 |
| 24655 | LARP7     | 2325.778 | -0.04948 | 0.161281 | -0.30678 | 0.759008 | 0.81839  | 2057.76  | 3083.571 | 1953.614 | 2281.234 | 2393.665 | 2184.825 |
| 23320 | CUNH6orf1 | 4930.753 | -0.04959 | 0.097103 | -0.51071 | 0.609555 | 0.694898 | 4965.511 | 5373.942 | 4712.189 | 4674.074 | 4693.209 | 5165.594 |
| 24796 | SLC25A22  | 1345.502 | -0.04974 | 0.176567 | -0.28171 | 0.778163 | 0.834307 | 1576.929 | 975.4879 | 1557.047 | 1287.937 | 1204.319 | 1471.29  |
| 25031 | TAF3      | 656.0932 | -0.04976 | 0.206867 | -0.24052 | 0.809926 | 0.860185 | 531.2446 | 929.5053 | 540.5833 | 676.3345 | 626.7594 | 632.1321 |
| 24147 | SRR       | 1256.683 | -0.04988 | 0.13006  | -0.38354 | 0.701317 | 0.772125 | 1170.364 | 1480.202 | 1186.918 | 1209.813 | 1189.346 | 1303.458 |
| 26331 | TRNAN-GL  | 3.241522 | -0.04996 | 1.35566  | -0.03686 | 0.9706   | 0.979926 | 2.168345 | 2.189647 | 5.565851 | 2.232127 | 4.278221 | 3.014938 |
| 26421 | LOC119621 | 1.457179 | -0.04999 | 2.022877 | -0.02471 | 0.980284 | 0.986369 | 2.710432 | 1.094824 | 0.695731 | 2.232127 | 0        | 2.009959 |
| 23301 | LOC103215 | 3255.129 | -0.05005 | 0.097407 | -0.51378 | 0.607403 | 0.693009 | 3241.134 | 3451.431 | 3247.674 | 3209.799 | 2964.807 | 3415.925 |
| 26112 | LOC119621 | 12.52289 | -0.05058 | 0.732187 | -0.06908 | 0.944929 | 0.962045 | 15.7205  | 12.04306 | 9.740239 | 15.62489 | 14.97377 | 7.034856 |
| 24294 | METTL14   | 1659.131 | -0.05058 | 0.139337 | -0.36303 | 0.716582 | 0.784158 | 1566.63  | 2040.751 | 1458.253 | 1562.489 | 1634.281 | 1692.385 |
| 24501 | POLR3C    | 570.7856 | -0.05059 | 0.153037 | -0.33057 | 0.740973 | 0.803975 | 551.3018 | 648.683  | 546.8449 | 540.1747 |          |          |



|       |           |          |          |          |          |          |          |          |          |           |          |          |          |
|-------|-----------|----------|----------|----------|----------|----------|----------|----------|----------|-----------|----------|----------|----------|
| 24256 | MCCC2     | 2145.812 | -0.05113 | 0.139032 | -0.36775 | 0.713058 | 0.781524 | 2023.066 | 2657.684 | 1872.213  | 2022.307 | 2085.633 | 2213.97  |
| 25613 | PGM2L1    | 57.232   | -0.05121 | 0.345004 | -0.14844 | 0.881996 | 0.915467 | 48.78777 | 63.49977 | 61.92009  | 58.0353  | 59.8951  | 51.25395 |
| 25889 | CUNH9orf  | 30.6656  | -0.05137 | 0.485137 | -0.10588 | 0.915679 | 0.940296 | 39.5723  | 25.18094 | 29.91645  | 22.32127 | 27.80844 | 39.1942  |
| 25505 | LOC119620 | 93.56145 | -0.05141 | 0.315268 | -0.16308 | 0.870457 | 0.907219 | 69.92914 | 124.2625 | 90.44508  | 91.51721 | 104.8164 | 80.39836 |
| 24887 | LOC103221 | 231.7966 | -0.05149 | 0.192095 | -0.26805 | 0.788658 | 0.842467 | 229.8446 | 264.3999 | 213.5895  | 243.3018 | 207.4937 | 232.1503 |
| 24045 | MPV17L2   | 838.4579 | -0.05153 | 0.129104 | -0.39916 | 0.689773 | 0.762637 | 820.7188 | 949.7595 | 791.7423  | 819.1906 | 785.0536 | 864.2823 |
| 24761 | GNB2      | 5147.797 | -0.05155 | 0.178706 | -0.28847 | 0.772985 | 0.829927 | 6386.862 | 3590.474 | 5746.045  | 4459.34  | 4494.272 | 5809.786 |
| 25605 | LOC103220 | 59.95469 | -0.05172 | 0.344437 | -0.15015 | 0.880648 | 0.914354 | 59.6295  | 57.47824 | 65.39875  | 75.89232 | 47.06043 | 54.26889 |
| 24319 | RBM48     | 652.2108 | -0.05175 | 0.144354 | -0.35852 | 0.719951 | 0.787002 | 595.7529 | 760.355  | 634.507   | 676.3345 | 618.203  | 628.1122 |
| 24929 | NDUF53    | 1738.33  | -0.05195 | 0.200853 | -0.25865 | 0.795906 | 0.848777 | 2147.204 | 1094.824 | 2067.018  | 1640.613 | 1798.992 | 1681.331 |
| 24267 | IFI35     | 2205.755 | -0.05197 | 0.141833 | -0.36642 | 0.714049 | 0.782255 | 2487.092 | 1837.661 | 2417.667  | 2049.093 | 1980.816 | 2462.2   |
| 25426 | LOC119621 | 109.5756 | -0.05211 | 0.294819 | -0.17675 | 0.859708 | 0.898896 | 123.5957 | 83.75401 | 125.2316  | 120.5349 | 121.9293 | 82.40832 |
| 23737 | VPS13D    | 6130.895 | -0.05218 | 0.116647 | -0.44732 | 0.654645 | 0.73319  | 5948.856 | 6886.988 | 5897.715  | 5477.64  | 5707.147 | 6867.025 |
| 23659 | SENP7     | 1424.909 | -0.05219 | 0.113227 | -0.46096 | 0.644831 | 0.724579 | 1380.694 | 1577.641 | 1392.158  | 1334.812 | 1497.377 | 1366.772 |
| 23376 | RER1      | 4264.416 | -0.05219 | 0.103906 | -0.50231 | 0.615446 | 0.699874 | 4660.859 | 3965.451 | 4403.98   | 4124.971 | 3935.964 | 4495.273 |
| 24352 | ERMARD    | 810.5213 | -0.05224 | 0.147787 | -0.35349 | 0.72372  | 0.790083 | 926.9677 | 699.0449 | 853.6624  | 749.9947 | 755.1061 | 878.3521 |
| 22939 | SLC26A2   | 2206.714 | -0.05224 | 0.091135 | -0.57325 | 0.566478 | 0.656516 | 2239.359 | 2242.199 | 2261.127  | 2147.306 | 2126.276 | 2224.02  |
| 25647 | LOC119615 | 56.77124 | -0.05231 | 0.366041 | -0.1429  | 0.886365 | 0.918783 | 52.58238 | 72.80577 | 48.00546  | 44.64254 | 66.31243 | 56.27885 |
| 25025 | CHAMP1    | 762.1606 | -0.05271 | 0.218533 | -0.2412  | 0.809397 | 0.859869 | 596.295  | 1107.414 | 625.4625  | 638.3883 | 806.4447 | 798.9587 |
| 23432 | LOC103224 | 4573.243 | -0.05278 | 0.106686 | -0.49469 | 0.620822 | 0.704351 | 4332.896 | 5275.408 | 4363.627  | 4417.379 | 4449.35  | 4600.796 |
| 23943 | SPC25     | 803.7522 | -0.0528  | 0.126792 | -0.41642 | 0.6771   | 0.751815 | 774.6414 | 907.0614 | 772.9576  | 794.6372 | 789.3318 | 783.884  |
| 24481 | ZNF480    | 418.5091 | -0.05283 | 0.158416 | -0.3335  | 0.738759 | 0.802219 | 382.1709 | 470.2267 | 425.0919  | 388.3901 | 449.2132 | 395.9619 |
| 23033 | TMED2     | 16478.61 | -0.05291 | 0.095128 | -0.55618 | 0.578085 | 0.667089 | 15784.47 | 17409.89 | 17140.04  | 16723.1  | 17070.1  | 14744.05 |
| 24903 | HDX       | 189.4299 | -0.05294 | 0.200077 | -0.26458 | 0.791334 | 0.844782 | 183.2252 | 200.9001 | 192.7176  | 191.9629 | 198.9373 | 168.8366 |
| 25904 | LOC103215 | 31.20128 | -0.05299 | 0.508798 | -0.10414 | 0.917054 | 0.941163 | 27.10432 | 45.98259 | 21.56767  | 26.78552 | 40.6431  | 25.12449 |
| 24772 | TRMT61A   | 787.9679 | -0.053   | 0.185039 | -0.28642 | 0.774553 | 0.83124  | 954.6141 | 591.2048 | 864.7941  | 772.3159 | 669.5416 | 875.3371 |
| 24102 | KIF3A     | 2839.983 | -0.05304 | 0.136027 | -0.38993 | 0.69659  | 0.768353 | 2590.631 | 3540.66  | 2544.985  | 2700.874 | 2857.852 | 2804.898 |
| 24376 | OSGIN1    | 1306.029 | -0.05313 | 0.151858 | -0.34984 | 0.726461 | 0.792294 | 1464.717 | 1044.462 | 1483.995  | 1299.098 | 1170.094 | 1373.807 |
| 23100 | SSR1      | 6831.428 | -0.05334 | 0.097935 | -0.54465 | 0.585993 | 0.6744   | 6527.804 | 7704.821 | 6638.669  | 6649.506 | 6875.102 | 6592.665 |
| 24625 | ARHGAP4C  | 346.3102 | -0.05338 | 0.17122  | -0.31178 | 0.755207 | 0.815317 | 365.3662 | 336.6583 | 360.3888  | 332.5869 | 290.9191 | 391.942  |
| 26230 | LOC103237 | 5.779087 | -0.05346 | 1.03876  | -0.05147 | 0.958954 | 0.971812 | 5.96295  | 3.831883 | 7.653045  | 8.928508 | 4.278221 | 4.019918 |
| 24626 | ZNF699    | 315.832  | -0.05349 | 0.171664 | -0.31158 | 0.755363 | 0.81542  | 306.2788 | 365.1237 | 293.5986  | 316.962  | 299.4755 | 313.5536 |
| 23785 | KMT5B     | 2693.279 | -0.05381 | 0.1227   | -0.43855 | 0.660988 | 0.738779 | 2601.472 | 3209.475 | 2420.449  | 2571.41  | 2635.384 | 2721.484 |
| 25767 | LOC103233 | 49.83354 | -0.05406 | 0.433661 | -0.12467 | 0.900784 | 0.929347 | 30.89892 | 72.80577 | 49.309693 | 49.10679 | 38.50399 | 58.28881 |
| 22634 | DYNLT1    | 3330.543 | -0.05411 | 0.087507 | -0.61832 | 0.536365 | 0.629969 | 3330.579 | 3370.962 | 3474.482  | 3363.815 | 3270.7   | 3172.72  |
| 23156 | ALDH18A1  | 5108.75  | -0.05411 | 0.100918 | -0.53615 | 0.591852 | 0.679466 | 5226.255 | 5223.404 | 5173.458  | 4763.359 | 4663.261 | 5602.761 |
| 24116 | FAM53B    | 777.9675 | -0.05414 | 0.13949  | -0.38812 | 0.697927 | 0.769381 | 859.749  | 720.9414 | 801.4825  | 765.6196 | 673.8199 | 846.1927 |
| 23188 | ZBTB41    | 2260.286 | -0.05425 | 0.102037 | -0.53167 | 0.594954 | 0.682113 | 2205.749 | 2481.965 | 2216.6    | 2245.52  | 2297.405 | 2114.477 |
| 23309 | GLYR1     | 5141.238 | -0.05437 | 0.10616  | -0.51212 | 0.60857  | 0.694102 | 5103.201 | 5792.164 | 4823.506  | 4979.875 | 4733.852 | 5414.829 |
| 23193 | ETV4      | 1578.656 | -0.05443 | 0.102608 | -0.53051 | 0.595759 | 0.682889 | 1601.865 | 1676.722 | 1549.394  | 1560.257 | 1471.708 | 1611.987 |
| 23222 | SLC50A1   | 1580.384 | -0.05445 | 0.103473 | -0.52621 | 0.598742 | 0.685452 | 1529.768 | 1639.498 | 1662.798  | 1607.131 | 1465.291 | 1577.818 |
| 25656 | LOC119627 | 43.64996 | -0.05446 | 0.385651 | -0.14122 | 0.887695 | 0.919838 | 45.53526 | 44.88777 | 42.43961  | 51.33892 | 38.50399 | 39.1942  |
| 24270 | HOXC4     | 546.3395 | -0.05449 | 0.148842 | -0.36609 | 0.714295 | 0.782364 | 501.972  | 638.2822 | 530.1473  | 535.7105 | 526.2212 | 545.7039 |
| 24470 | ATP5F1D   | 991.6973 | -0.05452 | 0.162523 | -0.33545 | 0.737287 | 0.801012 | 1104.23  | 763.6395 | 1163.263  | 1011.154 | 956.1825 | 951.7156 |
| 22960 | CCDC142   | 1790.424 | -0.05455 | 0.095747 | -0.56977 | 0.568835 | 0.658645 | 1798.643 | 1796.058 | 1876.388  | 1763.38  | 1792.575 | 1715.5   |
| 25902 | LOC103222 | 23.73468 | -0.0546  | 0.52343  | -0.10431 | 0.916926 | 0.941068 | 21.68345 | 22.44388 | 27.82925  | 24.5534  | 27.80844 | 18.08963 |
| 23253 | PPP1CA    | 9825.894 | -0.05461 | 0.104699 | -0.52162 | 0.601933 | 0.688187 | 10528.4  | 8695.637 | 10811.67  | 9843.68  | 9495.512 | 9580.469 |
| 24768 | LOC119627 | 587.7784 | -0.05463 | 0.190276 | -0.28713 | 0.774009 | 0.830791 | 670.5608 | 434.0976 | 694.3399  | 587.0494 | 515.5257 | 625.0972 |
| 23613 | FAM168A   | 1705.416 | -0.05474 | 0.117249 | -0.46689 | 0.640578 | 0.721203 | 1679.384 | 1947.144 | 1589.746  | 1631.685 | 1610.75  | 1773.789 |
| 23620 | LOC119615 | 897.7655 | -0.05477 | 0.117606 | -0.46569 | 0.641441 | 0.721923 | 961.6612 | 879.6908 | 904.4508  | 823.6549 | 917.6785 | 899.4566 |
| 23644 | LOC103245 | 1337.275 | -0.05496 | 0.118967 | -0.46202 | 0.644069 | 0.724135 | 1303.176 | 1519.068 | 1266.927  | 1234.366 | 1360.474 | 1339.638 |
| 24410 | PAQR6     | 445.4764 | -0.05501 | 0.15933  | -0.34526 | 0.729897 | 0.794933 | 491.1303 | 400.7054 | 472.4016  | 453.1218 | 387.179  | 468.3204 |
| 23637 | GTF2IRD1  | 1730.031 | -0.05506 | 0.118828 | -0.46334 | 0.643118 | 0.723296 | 1861.525 | 1602.274 | 1831.861  | 1638.381 | 1565.829 | 1880.317 |
| 23454 | STX17     | 2398.819 | -0.05524 | 0.112308 | -0.49189 | 0.622794 | 0.705935 | 2313.083 | 2759.503 | 2263.214  | 2256.68  | 2374.413 | 2426.02  |
| 24076 | POLL      | 1208.858 | -0.05531 | 0.140543 | -0.39352 | 0.693932 | 0.766225 | 1322.691 | 1090.444 | 1289.19   | 1171.867 | 1018.217 | 1360.742 |
| 23914 | DNAL4     | 1001.731 | -0.05538 | 0.131591 | -0.42085 | 0.673868 | 0.749133 | 1113.445 | 890.639  | 1061.686  | 991.0644 | 913.4003 | 1040.154 |
| 23085 | SCD       | 71212.95 | -0.05542 | 0.100987 | -0.54878 | 0.583156 | 0.671542 | 69640.21 | 79968.11 | 68139.93  | 67533    | 66030.07 | 75966.4  |
| 24472 | CHTF18    | 611.8749 | -0.05567 | 0.166407 | -0.33454 | 0.737975 | 0.801694 | 687.3655 | 526.0628 | 663.032   | 549.1032 | 541.195  | 704.4906 |
| 23712 | CHD8      | 9077.105 | -0.05571 | 0.12313  | -0.45242 | 0.650968 | 0.72981  | 8428.901 | 10955.9  | 8375.91   | 8734.313 | 8348.949 | 9618.658 |
| 23808 | CDK13     | 5226.631 | -0.0558  | 0.128145 | -0.43545 | 0.663235 | 0.740596 | 4784.996 | 6454.533 | 4742.801  | 5243.266 | 5009.797 | 5124.39  |
| 24336 | SAMD1     | 1913.557 | -0.05599 | 0.156912 | -0.3568  | 0.721244 | 0.78792  | 1615.417 | 2498.935 | 1737.937  | 1904.004 | 1807.549 | 1917.501 |
| 26378 | LOC119627 | 1.833641 | -0.05601 | 1.805738 | -0.03102 | 0.975257 | 0.982911 | 1.626259 | 2.737059 | 1.391463  | 2.232127 | 0        | 3.014938 |
| 25953 | LOC119620 | 20.08404 | -0.05601 | 0.590856 | -0.09479 | 0.924482 | 0.946975 | 16.80468 | 19.70683 | 24.3506   | 15.62489 | 29.94755 | 14.06971 |
| 23653 | GOLGA5    | 2562.903 | -0.05602 | 0.121359 | -0.4616  | 0.644371 | 0.724254 | 2483.84  | 3035.946 | 2317.481  | 2428.554 | 2601.159 | 2510.439 |
| 22640 | PPP1CB    | 20724.4  | -0.05629 | 0.091183 | -0.61729 | 0.537045 | 0.630625 | 19855    | 23118.3  | 20412.76  | 19946.29 | 20603.91 | 20410.13 |
| 23417 | ME1       | 1581.577 | -0.05636 | 0.113485 | -0.49659 | 0.619476 | 0.70324  | 1517.842 | 1716.683 | 1608.531  | 1419.633 | 1544.438 | 1682.336 |
| 25601 | SYCP2     | 59.53436 | -0.05639 | 0.373299 | -0.15107 | 0.879921 | 0.913742 | 55.8349  | 63.49977 | 60.52863  | 78.12444 | 62.03421 | 37.18424 |
| 26208 | LOC119620 | 6.199094 | -0.05642 | 1.026093 | -0.05498 | 0.956153 | 0.969907 | 8.673382 | 4.379295 | 6.261582  | 6.696381 | 2.139111 | 9.044815 |
| 24324 | RBM34     | 896.0952 | -0.05643 | 0.157594 | -0.35804 | 0.720311 | 0.787266 | 804.4562 | 1132.048 | 802.874   | 868.2974 | 917.6785 | 851.2176 |
| 25966 | LOC119627 | 23.62926 | -0.05653 | 0.604225 | -0.09357 | 0.925454 | 0.947516 | 24.39389 | 18.612   | 28.52499  | 13.39276 | 42.78    |          |



|       |           |          |          |          |          |          |          |          |          |          |          |          |          |
|-------|-----------|----------|----------|----------|----------|----------|----------|----------|----------|----------|----------|----------|----------|
| 25911 | NEURL2    | 23.13101 | -0.05729 | 0.556746 | -0.1029  | 0.918043 | 0.94188  | 31.44101 | 18.612   | 21.56767 | 15.62489 | 21.39111 | 30.14938 |
| 23388 | METTL8    | 999.4413 | -0.05732 | 0.114534 | -0.50046 | 0.616748 | 0.701033 | 1070.078 | 963.4448 | 1021.334 | 1015.618 | 992.5473 | 933.6259 |
| 23896 | RNF38     | 1687.532 | -0.05733 | 0.135474 | -0.42321 | 0.672143 | 0.747757 | 1558.498 | 2041.299 | 1566.787 | 1593.739 | 1567.968 | 1796.903 |
| 25882 | LOC119621 | 25.96315 | -0.05734 | 0.539874 | -0.10621 | 0.915414 | 0.940191 | 39.5723  | 18.06459 | 21.56767 | 26.78552 | 25.66933 | 24.11951 |
| 25765 | LOC103224 | 67.69962 | -0.05741 | 0.458282 | -0.12528 | 0.900305 | 0.928958 | 35.7777  | 120.4306 | 50.09266 | 82.5887  | 62.03421 | 55.27387 |
| 25932 | SEPTIN4   | 25.8849  | -0.05742 | 0.575828 | -0.09972 | 0.920567 | 0.943748 | 20.59928 | 19.15941 | 38.96096 | 17.85702 | 40.6431  | 18.08963 |
| 23686 | YAF2      | 1335.229 | -0.05743 | 0.126163 | -0.45523 | 0.648942 | 0.728368 | 1440.866 | 1296.271 | 1344.849 | 1200.884 | 1514.49  | 1214.015 |
| 26196 | TRNAE-CU  | 7.271623 | -0.05749 | 1.001212 | -0.05742 | 0.954213 | 0.968383 | 9.757555 | 2.189647 | 10.43597 | 8.928508 | 4.278221 | 8.039836 |
| 22628 | SLF2      | 4981.418 | -0.05754 | 0.09291  | -0.61931 | 0.535709 | 0.62939  | 5000.747 | 5477.403 | 4763.673 | 4803.537 | 4949.902 | 4893.245 |
| 25916 | LOC119621 | 29.23813 | -0.05763 | 0.562169 | -0.10251 | 0.918353 | 0.942059 | 48.78777 | 14.23271 | 26.43779 | 29.01765 | 27.80844 | 29.1444  |
| 26152 | MCOLN2    | 11.85316 | -0.05773 | 0.909704 | -0.06346 | 0.949399 | 0.965119 | 14.09425 | 11.49565 | 9.740239 | 13.39276 | 21.39111 | 1.004979 |
| 24051 | ZNF26     | 451.5999 | -0.05775 | 0.145029 | -0.39819 | 0.690488 | 0.763237 | 470.531  | 459.8259 | 449.4425 | 421.872  | 489.8563 | 418.0715 |
| 24150 | TAF9B     | 1039.114 | -0.05776 | 0.150712 | -0.38328 | 0.701511 | 0.772243 | 913.4155 | 1283.681 | 979.5898 | 1044.635 | 1071.694 | 941.6658 |
| 24413 | TOP1      | 4763.53  | -0.05798 | 0.168048 | -0.34499 | 0.730099 | 0.795055 | 3982.709 | 6555.256 | 4040.112 | 4450.861 | 4742.408 | 4809.832 |
| 23274 | CUNH2orf4 | 1290.38  | -0.058   | 0.112091 | -0.51741 | 0.60487  | 0.69092  | 1254.93  | 1406.848 | 1282.929 | 1337.044 | 1270.632 | 1189.896 |
| 22741 | PCYT2     | 5495.356 | -0.05813 | 0.096472 | -0.60256 | 0.546804 | 0.639232 | 5682.149 | 5369.015 | 5774.57  | 5334.783 | 4977.711 | 5833.906 |
| 25958 | MMP7      | 17.72493 | -0.05816 | 0.61741  | -0.09421 | 0.924946 | 0.947255 | 15.7205  | 19.15941 | 18.78475 | 26.78552 | 12.83466 | 13.06473 |
| 22650 | BAG6      | 11976.27 | -0.05828 | 0.094695 | -0.61541 | 0.538282 | 0.631778 | 11642.39 | 12986.25 | 12032.67 | 11562.42 | 10982.19 | 12651.69 |
| 23842 | ZNF136    | 488.0972 | -0.05829 | 0.135106 | -0.43145 | 0.666138 | 0.742777 | 509.5612 | 487.7439 | 496.0565 | 468.7467 | 494.1346 | 472.3404 |
| 24934 | CROCC     | 223.6871 | -0.05833 | 0.226817 | -0.25716 | 0.797052 | 0.849828 | 254.7806 | 192.1415 | 239.3316 | 252.2303 | 160.4333 | 243.205  |
| 25580 | LOC103222 | 46.49669 | -0.05833 | 0.377832 | -0.15439 | 0.877303 | 0.911735 | 50.41403 | 41.6033  | 50.09266 | 40.17829 | 53.47777 | 43.21412 |
| 23077 | CBX6      | 7039.707 | -0.05851 | 0.106429 | -0.54976 | 0.582486 | 0.671031 | 7317.624 | 6729.881 | 7509.029 | 6660.667 | 6284.707 | 7736.332 |
| 23755 | ZNF18     | 630.1092 | -0.0586  | 0.131938 | -0.44412 | 0.656957 | 0.73526  | 641.8303 | 673.8639 | 616.418  | 569.1924 | 616.0639 | 663.2864 |
| 24847 | LOC119621 | 183.6232 | -0.05872 | 0.214345 | -0.27396 | 0.784117 | 0.838964 | 189.7302 | 191.5941 | 177.4115 | 194.195  | 201.0764 | 147.732  |
| 23969 | CUNH19orf | 429.9622 | -0.05883 | 0.142892 | -0.41168 | 0.680574 | 0.754852 | 446.6792 | 416.033  | 454.3126 | 419.6399 | 414.9875 | 428.1213 |
| 26265 | CLDN6     | 3.661199 | -0.05889 | 1.297361 | -0.04539 | 0.963795 | 0.975538 | 2.168345 | 3.831883 | 5.565851 | 2.232127 | 2.139111 | 6.029877 |
| 22941 | SLC35B3   | 1511.534 | -0.05892 | 0.102821 | -0.57302 | 0.566629 | 0.656634 | 1620.838 | 1507.572 | 1499.301 | 1419.633 | 1529.464 | 1492.395 |
| 25611 | LOC103235 | 45.27183 | -0.05908 | 0.397443 | -0.14864 | 0.881839 | 0.915359 | 52.04029 | 48.71965 | 38.96096 | 42.41041 | 34.22577 | 55.27387 |
| 25020 | LOC103238 | 616.6252 | -0.05911 | 0.243821 | -0.24244 | 0.808442 | 0.85901  | 791.9882 | 349.2487 | 747.2155 | 582.5851 | 609.6465 | 619.0674 |
| 25493 | LOC103231 | 64.16627 | -0.05927 | 0.358176 | -0.16547 | 0.868571 | 0.905776 | 57.46116 | 73.35318 | 64.70302 | 89.28508 | 44.92132 | 55.27387 |
| 24494 | FBXW5     | 1615.788 | -0.05932 | 0.178704 | -0.33194 | 0.739933 | 0.8031   | 1986.204 | 1163.798 | 1799.161 | 1656.238 | 1381.865 | 1707.46  |
| 23749 | ZNF260    | 2343.147 | -0.05935 | 0.133433 | -0.4448  | 0.656462 | 0.734854 | 2160.214 | 2892.524 | 2119.893 | 2283.466 | 2346.604 | 2256.179 |
| 22504 | MSH2      | 2816.203 | -0.05937 | 0.092953 | -0.63869 | 0.523026 | 0.617875 | 2860.59  | 2984.489 | 2781.534 | 2676.32  | 2705.975 | 2888.311 |
| 23088 | DYNC1L1I2 | 6833.482 | -0.05942 | 0.108497 | -0.54767 | 0.583917 | 0.672359 | 6822.699 | 7804.45  | 6299.848 | 6511.114 | 6368.132 | 7194.648 |
| 26143 | TRNAD-GU  | 10.16679 | -0.05946 | 0.918933 | -0.0647  | 0.94841  | 0.964412 | 11.9259  | 4.926706 | 15.30609 | 4.464254 | 4.278221 | 20.09959 |
| 25959 | LOC103241 | 20.84918 | -0.05959 | 0.632395 | -0.09423 | 0.924924 | 0.947255 | 17.34676 | 20.25424 | 25.04633 | 22.32127 | 32.08666 | 8.039836 |
| 26338 | TRNAR-UC  | 2.468113 | -0.05963 | 1.664326 | -0.03583 | 0.971422 | 0.980494 | 2.710432 | 3.284471 | 1.391463 | 0        | 6.417332 | 1.004979 |
| 21786 | CD59      | 11206.7  | -0.05965 | 0.07834  | -0.76144 | 0.446397 | 0.544717 | 11440.19 | 11173.77 | 11702.2  | 10781.17 | 11121.24 | 11021.61 |
| 26427 | LOC103221 | 1.069652 | -0.05973 | 2.496495 | -0.02392 | 0.980914 | 0.986778 | 1.084173 | 2.189647 | 0        | 0        | 2.139111 | 1.004979 |
| 23076 | ZBTB40    | 2979.638 | -0.05996 | 0.109019 | -0.54999 | 0.582328 | 0.670878 | 2962.502 | 3224.803 | 2943.639 | 2939.711 | 2603.298 | 3203.875 |
| 22865 | AP3S1     | 3241.486 | -0.05996 | 0.102744 | -0.5836  | 0.559488 | 0.650513 | 3054.115 | 3627.698 | 3242.108 | 3305.78  | 3135.936 | 3083.277 |
| 23657 | GFER      | 735.8469 | -0.06002 | 0.130113 | -0.46125 | 0.644616 | 0.724399 | 755.6684 | 708.3509 | 793.8295 | 716.5128 | 658.8461 | 781.874  |
| 25119 | SAXO1     | 134.4787 | -0.06011 | 0.263863 | -0.22782 | 0.819782 | 0.86765  | 111.6698 | 174.6244 | 124.5359 | 145.0883 | 128.3466 | 122.6075 |
| 23216 | SCYL3     | 941.2611 | -0.06024 | 0.114256 | -0.5272  | 0.598055 | 0.684842 | 1001.776 | 947.5699 | 932.28   | 886.1544 | 973.2954 | 906.4915 |
| 26279 | LOC119621 | 3.272654 | -0.0603  | 1.37121  | -0.04397 | 0.964926 | 0.976125 | 5.96295  | 2.189647 | 2.087194 | 2.232127 | 2.139111 | 5.024897 |
| 24269 | TSEN34    | 1801.065 | -0.06031 | 0.164678 | -0.36622 | 0.714203 | 0.78236  | 2121.184 | 1371.814 | 2027.361 | 1716.506 | 1578.664 | 1990.864 |
| 23655 | STYX      | 2477.679 | -0.06042 | 0.130948 | -0.46137 | 0.64453  | 0.724364 | 2240.985 | 3040.325 | 2306.349 | 2390.608 | 2489.925 | 2397.881 |
| 25524 | LOC119621 | 52.50991 | -0.06061 | 0.374736 | -0.16174 | 0.87151  | 0.907756 | 58.00324 | 50.36189 | 51.48412 | 42.41041 | 70.59065 | 42.20914 |
| 22538 | KLC1      | 9588.785 | -0.06079 | 0.095753 | -0.63491 | 0.52549  | 0.619866 | 10003.66 | 10409.04 | 8963.803 | 9243.238 | 8992.821 | 9920.152 |
| 25880 | LOC103221 | 22.33381 | -0.06082 | 0.571171 | -0.10648 | 0.915203 | 0.940163 | 18.97302 | 33.39212 | 16.00182 | 17.85702 | 25.66933 | 22.10955 |
| 23004 | KHNYN     | 4502.63  | -0.06094 | 0.108405 | -0.56216 | 0.574007 | 0.663348 | 4875.525 | 4394.075 | 4531.298 | 4354.88  | 3946.659 | 4913.345 |
| 22251 | COMMD7    | 2646.972 | -0.06105 | 0.08927  | -0.68388 | 0.494053 | 0.590283 | 2738.62  | 2619.366 | 2752.313 | 2580.339 | 2571.211 | 2619.981 |
| 25403 | LOC103241 | 106.3117 | -0.06107 | 0.338643 | -0.18033 | 0.856894 | 0.896695 | 133.3532 | 64.59459 | 127.3188 | 131.6955 | 83.42532 | 97.48301 |
| 23220 | STK10     | 2905.646 | -0.06111 | 0.11609  | -0.52639 | 0.598614 | 0.685335 | 2978.223 | 3092.329 | 2838.584 | 2821.409 | 2481.368 | 3221.964 |
| 24087 | TPK3      | 472.7342 | -0.06119 | 0.15604  | -0.39214 | 0.694955 | 0.767005 | 479.7464 | 497.5973 | 476.576  | 410.7114 | 432.1004 | 539.674  |
| 23423 | UNKL      | 1801.356 | -0.06138 | 0.123769 | -0.49589 | 0.619969 | 0.703677 | 2035.534 | 1622.529 | 1865.952 | 1725.434 | 1632.141 | 1926.546 |
| 22603 | KIFAP3    | 2635.128 | -0.06139 | 0.09841  | -0.62379 | 0.532768 | 0.626652 | 2629.661 | 2888.692 | 2557.509 | 2482.125 | 2592.602 | 2660.181 |
| 23460 | GPRC5A    | 851.9159 | -0.06148 | 0.12519  | -0.49108 | 0.623367 | 0.706403 | 908.5368 | 907.0614 | 793.8295 | 886.1544 | 780.7754 | 835.1379 |
| 26075 | CIB3      | 10.1211  | -0.06156 | 0.822376 | -0.07485 | 0.940333 | 0.958759 | 6.505036 | 10.94824 | 13.91463 | 4.464254 | 12.83466 | 12.05975 |
| 22667 | ATP2A2    | 8702.122 | -0.06157 | 0.100603 | -0.61203 | 0.540516 | 0.633917 | 8836.008 | 9419.315 | 8416.262 | 8028.961 | 8096.534 | 9415.653 |
| 23633 | DDX59     | 821.6892 | -0.06163 | 0.132926 | -0.46367 | 0.642881 | 0.723122 | 781.1465 | 949.2121 | 785.4807 | 794.6372 | 842.8096 | 776.8491 |
| 25949 | RNF133    | 15.6578  | -0.0619  | 0.646084 | -0.09581 | 0.923671 | 0.946284 | 14.09425 | 15.87494 | 18.78475 | 13.39276 | 10.69555 | 21.10457 |
| 23419 | DYRK1A    | 5418.038 | -0.06207 | 0.124996 | -0.49657 | 0.619491 | 0.70324  | 5009.42  | 6629.157 | 4966.826 | 5127.196 | 5247.238 | 5528.392 |
| 25799 | LOC103221 | 24.86453 | -0.06207 | 0.516865 | -0.12009 | 0.90441  | 0.931964 | 27.6464  | 21.34906 | 27.13352 | 17.85702 | 32.08666 | 23.11453 |
| 24184 | GPSM1     | 885.8281 | -0.06216 | 0.165003 | -0.37673 | 0.706376 | 0.776505 | 1027.796 | 685.3596 | 1003.245 | 870.5295 | 823.5576 | 904.4815 |
| 23346 | SPRTN     | 730.5034 | -0.06221 | 0.122732 | -0.50684 | 0.612265 | 0.697209 | 765.968  | 770.2084 | 701.2972 | 698.6557 | 744.4105 | 702.4806 |
| 22863 | MYO1C     | 11527.33 | -0.06235 | 0.106779 | -0.58389 | 0.559292 | 0.650342 | 12463.65 | 10973.42 | 11901.18 | 10839.21 | 10297.68 | 12688.87 |
| 24074 | ADPRS     | 1258.242 | -0.06242 | 0.158607 | -0.39354 | 0.693922 | 0.766225 | 1533.562 | 1055.41  | 1272.493 | 1147.313 | 1116.616 | 1424.056 |
| 23298 | CDC73     | 1829.317 | -0.06243 | 0.121357 | -0.51444 | 0.606948 | 0.692579 | 1678.299 | 2150.781 | 1777.594 | 1745.523 | 1826.801 | 1796.903 |
| 26236 | LOC103211 | 5.091235 | -0.06265 | 1.222373 | -0.05125 | 0.959123 | 0.971881 | 3.252518 | 1.642235 | 10.43597 | 8.928508 | 4.278221 |          |



|       |           |          |          |          |          |          |          |           |          |          |          |          |          |
|-------|-----------|----------|----------|----------|----------|----------|----------|-----------|----------|----------|----------|----------|----------|
| 24779 | LOC119626 | 300.597  | -0.06322 | 0.221272 | -0.28573 | 0.775082 | 0.831574 | 272.6694  | 394.6839 | 253.942  | 243.3018 | 346.5359 | 292.449  |
| 22540 | MARCHF7   | 5564.544 | -0.06341 | 0.09992  | -0.63464 | 0.525666 | 0.620002 | 5535.786  | 6242.684 | 5280.601 | 5225.409 | 5722.121 | 5380.66  |
| 22925 | RBM10     | 3135.354 | -0.06342 | 0.110166 | -0.57566 | 0.564847 | 0.655025 | 3078.508  | 3576.789 | 2961.728 | 2964.265 | 2945.555 | 3285.278 |
| 23689 | ZNF211    | 551.6945 | -0.06354 | 0.139656 | -0.45501 | 0.649105 | 0.728459 | 585.9954  | 594.4892 | 512.754  | 508.925  | 541.195  | 566.8084 |
| 25047 | LOC103236 | 118.1398 | -0.06371 | 0.267838 | -0.23787 | 0.811978 | 0.861803 | 150.7     | 108.3875 | 102.9682 | 107.1421 | 124.0684 | 115.5726 |
| 22507 | CDCA4     | 1703.09  | -0.06376 | 0.099877 | -0.6384  | 0.523211 | 0.61801  | 1749.313  | 1757.739 | 1718.456 | 1689.72  | 1563.69  | 1739.619 |
| 26159 | TRNAK-UU  | 6.512187 | -0.06382 | 1.026189 | -0.06219 | 0.950411 | 0.965852 | 7.589209  | 9.306001 | 3.478657 | 2.232127 | 6.417332 | 10.04979 |
| 22237 | ZW10      | 2625.342 | -0.06393 | 0.093211 | -0.68591 | 0.492769 | 0.58912  | 2713.684  | 2781.399 | 2557.509 | 2491.054 | 2573.35  | 2635.056 |
| 23168 | LOC103221 | 2141.154 | -0.06411 | 0.11993  | -0.53457 | 0.592947 | 0.6804   | 2418.789  | 1952.071 | 2200.598 | 2049.093 | 1938.034 | 2288.338 |
| 23670 | VWA8      | 1443.787 | -0.06412 | 0.139789 | -0.45871 | 0.646442 | 0.726022 | 1342.206  | 1768.688 | 1319.107 | 1392.847 | 1328.388 | 1511.489 |
| 22511 | PPP2R5D   | 4317.186 | -0.06433 | 0.10083  | -0.63796 | 0.5235   | 0.618242 | 4390.358  | 4648.074 | 4208.479 | 4167.381 | 3891.042 | 4597.781 |
| 25033 | LINC02875 | 106.8786 | -0.06439 | 0.267855 | -0.2404  | 0.810016 | 0.860236 | 105.7068  | 95.79707 | 125.2316 | 120.5349 | 100.5382 | 93.46309 |
| 23135 | PIN1      | 1873.701 | -0.0644  | 0.11939  | -0.53941 | 0.589602 | 0.677526 | 2013.851  | 1671.248 | 2064.235 | 1881.683 | 1702.732 | 1908.456 |
| 25354 | GPC2      | 81.19845 | -0.06442 | 0.34033  | -0.18928 | 0.849871 | 0.891157 | 76.43418  | 72.80577 | 98.09812 | 69.19594 | 113.3729 | 57.28383 |
| 22689 | ARHGFE11  | 4244.46  | -0.06462 | 0.106017 | -0.60955 | 0.542159 | 0.63522  | 4202.254  | 4610.85  | 4212.653 | 4111.578 | 3747.722 | 4581.701 |
| 24748 | ZNF594    | 174.854  | -0.06467 | 0.223198 | -0.28972 | 0.772029 | 0.829335 | 175.636   | 195.9734 | 166.2798 | 133.9276 | 190.3808 | 186.9262 |
| 24728 | TICAM1    | 194.8552 | -0.06467 | 0.219579 | -0.2945  | 0.768373 | 0.826102 | 170.2151  | 228.8181 | 200.3706 | 158.481  | 203.2155 | 208.0308 |
| 23125 | PEX2      | 1470.066 | -0.06472 | 0.119869 | -0.5399  | 0.589263 | 0.677401 | 1559.04   | 1362.508 | 1587.659 | 1312.491 | 1578.664 | 1420.036 |
| 26158 | LOC103224 | 5.418385 | -0.06481 | 1.039525 | -0.06234 | 0.95029  | 0.965802 | 5.96295   | 4.379295 | 6.261582 | 4.464254 | 6.417332 | 5.024897 |
| 22604 | TRIP12    | 19135.97 | -0.06481 | 0.10391  | -0.62369 | 0.532834 | 0.626666 | 18873.28  | 21809.98 | 18018.75 | 18426.21 | 17592.05 | 20095.57 |
| 25657 | LOC103226 | 33.88375 | -0.06489 | 0.460095 | -0.14104 | 0.887836 | 0.919892 | 29.81475  | 32.84471 | 40.35242 | 31.24978 | 44.92132 | 24.11951 |
| 25301 | CUNH11or  | 63.30654 | -0.06502 | 0.327392 | -0.1986  | 0.842579 | 0.885336 | 55.8349   | 72.25836 | 66.09448 | 58.0353  | 66.31243 | 61.30375 |
| 25630 | SORD      | 43.42336 | -0.06504 | 0.446698 | -0.1456  | 0.884239 | 0.917187 | 42.28274  | 41.6033  | 47.30973 | 58.0353  | 49.19955 | 22.10955 |
| 23344 | TRIM44    | 9335.88  | -0.06509 | 0.128391 | -0.50697 | 0.612179 | 0.697147 | 8670.671  | 11523.57 | 8448.266 | 8819.134 | 8733.989 | 9819.654 |
| 23063 | POMT1     | 1422.39  | -0.06525 | 0.118274 | -0.55172 | 0.58114  | 0.669887 | 1533.562  | 1329.116 | 1506.954 | 1319.187 | 1321.97  | 1523.549 |
| 25856 | LOC119621 | 21.08858 | -0.06526 | 0.590358 | -0.11055 | 0.911977 | 0.937654 | 26.56223  | 12.59047 | 25.74206 | 24.5534  | 14.97377 | 22.10955 |
| 22614 | XRN2      | 7094.21  | -0.06537 | 0.104958 | -0.62278 | 0.533427 | 0.6271   | 6912.143  | 8169.574 | 6685.978 | 6689.685 | 6840.876 | 7267.007 |
| 23339 | ATP5MG    | 2436.08  | -0.06538 | 0.128852 | -0.5074  | 0.611872 | 0.696912 | 2678.449  | 2076.333 | 2715.44  | 2544.625 | 2410.778 | 2190.855 |
| 23912 | LOC103238 | 624.9782 | -0.06538 | 0.155285 | -0.42105 | 0.673722 | 0.749023 | 568.6486  | 763.0921 | 585.1101 | 595.9779 | 631.0376 | 606.0026 |
| 22234 | CUNHXorf1 | 2119.257 | -0.06543 | 0.095252 | -0.68696 | 0.492108 | 0.588435 | 2251.285  | 2183.626 | 2064.931 | 2102.664 | 2074.937 | 2038.098 |
| 25463 | LOC119621 | 51.86297 | -0.06555 | 0.385118 | -0.1702  | 0.864852 | 0.90296  | 46.61943  | 63.49977 | 48.00546 | 69.19594 | 40.6431  | 43.21412 |
| 22170 | RAP1B     | 4551.79  | -0.06557 | 0.094191 | -0.6961  | 0.486365 | 0.583222 | 4373.011  | 5039.473 | 4551.475 | 4464.254 | 4502.828 | 4379.701 |
| 25988 | LOC119621 | 12.54665 | -0.06558 | 0.73228  | -0.08956 | 0.92864  | 0.949973 | 12.46799  | 14.23271 | 11.1317  | 11.16063 | 19.252   | 7.034856 |
| 24732 | KIF6      | 152.1719 | -0.06576 | 0.223679 | -0.29401 | 0.768748 | 0.826345 | 146.36345 | 165.3184 | 153.7566 | 171.839  | 139.0422 | 136.6772 |
| 22686 | VPS26A    | 4653.573 | -0.06581 | 0.107916 | -0.60982 | 0.54198  | 0.635129 | 4492.812  | 5362.994 | 4426.939 | 4390.594 | 4432.237 | 4815.862 |
| 26091 | LOC119621 | 7.248146 | -0.06581 | 0.910557 | -0.07228 | 0.942381 | 0.960224 | 7.047123  | 6.02153  | 9.044508 | 8.928508 | 6.417332 | 6.029877 |
| 23045 | LOC103221 | 1684.725 | -0.06583 | 0.118601 | -0.55509 | 0.578835 | 0.667752 | 1626.259  | 1923.058 | 1623.837 | 1649.542 | 1520.908 | 1764.744 |
| 26138 | TRNAV-AA  | 8.421287 | -0.06589 | 1.006679 | -0.06546 | 0.947811 | 0.96402  | 8.131296  | 6.02153  | 11.1317  | 20.08914 | 2.139111 | 3.014938 |
| 23078 | METTL1    | 735.4891 | -0.0659  | 0.119897 | -0.54966 | 0.58255  | 0.671076 | 732.3587  | 758.7128 | 763.913  | 754.4589 | 708.0456 | 695.4458 |
| 24466 | ABHD17A   | 783.8978 | -0.06601 | 0.196509 | -0.33591 | 0.736937 | 0.800768 | 941.604   | 551.2437 | 914.191  | 819.1966 | 633.1243 | 814.0334 |
| 24752 | LOC103241 | 211.684  | -0.06614 | 0.22897  | -0.28885 | 0.772696 | 0.82975  | 174.0097  | 273.7059 | 201.0664 | 227.677  | 194.6591 | 198.9859 |
| 22721 | CNEP1R1   | 1022.637 | -0.06616 | 0.109298 | -0.60535 | 0.544944 | 0.63763  | 1051.648  | 1031.871 | 1056.816 | 1015.618 | 949.7651 | 1030.104 |
| 23695 | SERTAD2   | 1264.264 | -0.0662  | 0.145782 | -0.45412 | 0.649741 | 0.728988 | 1164.402  | 1542.606 | 1176.482 | 1220.973 | 1112.338 | 1368.782 |
| 25330 | LOC103231 | 77.96149 | -0.06624 | 0.339449 | -0.19515 | 0.845276 | 0.887156 | 93.78094  | 60.76271 | 86.96642 | 64.73168 | 62.03421 | 99.49297 |
| 21743 | LAPTM4B   | 4589.539 | -0.06644 | 0.08621  | -0.77063 | 0.440926 | 0.539117 | 4764.397  | 4789.306 | 4535.473 | 4435.236 | 4363.786 | 4649.035 |
| 25839 | LOC119621 | 20.77419 | -0.06648 | 0.583836 | -0.11386 | 0.909349 | 0.935603 | 18.97302  | 16.42235 | 28.52499 | 26.78552 | 12.83466 | 21.10457 |
| 22687 | TBC1D10B  | 2157.128 | -0.06653 | 0.10911  | -0.60971 | 0.542051 | 0.635156 | 2296.278  | 2294.75  | 2034.319 | 2089.271 | 1950.869 | 2277.283 |
| 22280 | MKNK2     | 5518.176 | -0.0666  | 0.098398 | -0.67687 | 0.498489 | 0.594809 | 5775.93   | 5338.36  | 5828.837 | 5439.693 | 4928.511 | 5797.727 |
| 22672 | UBR4      | 13773.82 | -0.06674 | 0.109137 | -0.61149 | 0.540875 | 0.634226 | 14029.74  | 14626.3  | 13631.46 | 12484.29 | 12351.22 | 15519.9  |
| 26076 | LOC103241 | 9.039801 | -0.06675 | 0.892907 | -0.07475 | 0.94041  | 0.958767 | 12.46799  | 3.284471 | 11.82743 | 8.928508 | 10.69555 | 7.034856 |
| 24517 | SHLD1     | 198.734  | -0.06678 | 0.203355 | -0.32838 | 0.742622 | 0.805262 | 221.7133  | 181.1933 | 205.2408 | 200.8914 | 207.4937 | 175.8714 |
| 21846 | PPP1R15B  | 5748.651 | -0.06678 | 0.088657 | -0.75324 | 0.451309 | 0.54921  | 5944.519  | 6023.172 | 5683.43  | 5462.015 | 5416.228 | 5962.543 |
| 22936 | WRNIP1    | 1709.043 | -0.0668  | 0.116497 | -0.57338 | 0.566391 | 0.656495 | 1701.609  | 1919.226 | 1630.099 | 1604.899 | 1574.385 | 1824.038 |
| 21882 | NAA20     | 2876.748 | -0.06686 | 0.089475 | -0.74727 | 0.4549   | 0.55267  | 3020.505  | 2906.209 | 2899.808 | 2839.266 | 2879.243 | 2715.455 |
| 22505 | ZC3H7B    | 6349.813 | -0.06687 | 0.104735 | -0.63846 | 0.523174 | 0.617995 | 6618.332  | 6551.972 | 6329.068 | 6131.653 | 5527.462 | 6940.388 |
| 24836 | TOGARAM   | 172.0666 | -0.06691 | 0.242659 | -0.27572 | 0.782761 | 0.837885 | 185.9356  | 140.6848 | 204.545  | 145.0883 | 156.1551 | 199.9909 |
| 23639 | EFNB2     | 1418.473 | -0.06695 | 0.144558 | -0.46312 | 0.643276 | 0.723444 | 1350.879  | 1718.873 | 1289.19  | 1261.152 | 1321.97  | 1568.773 |
| 21792 | TUBB4B    | 15018.71 | -0.06706 | 0.088165 | -0.76067 | 0.446857 | 0.54514  | 15015.25  | 16376.37 | 14715.41 | 14691.86 | 14017.59 | 15295.79 |
| 22444 | LOC103241 | 1474.9   | -0.06711 | 0.103241 | -0.65003 | 0.515674 | 0.610818 | 1510.253  | 1461.59  | 1559.83  | 1430.793 | 1375.448 | 1511.489 |
| 22281 | IQCE      | 1982.62  | -0.06713 | 0.099198 | -0.67668 | 0.49861  | 0.594926 | 1941.211  | 2098.229 | 2051.016 | 1921.861 | 1850.331 | 2033.073 |
| 23565 | CUNHXorf1 | 962.3482 | -0.06724 | 0.141637 | -0.47475 | 0.634965 | 0.71634  | 964.3717  | 1128.763 | 860.6197 | 1024.546 | 847.0878 | 948.7006 |
| 25414 | LOC119621 | 50.51779 | -0.06749 | 0.377848 | -0.1786  | 0.858248 | 0.897794 | 58.54533  | 46.53    | 48.7012  | 49.10679 | 62.03421 | 38.18922 |
| 22398 | TTL4      | 2155.078 | -0.06753 | 0.102643 | -0.65791 | 0.510597 | 0.606047 | 2214.423  | 2317.194 | 2089.977 | 1997.754 | 2059.964 | 2251.154 |
| 25393 | CASQ2     | 52.36278 | -0.06759 | 0.369914 | -0.18272 | 0.855016 | 0.895152 | 46.61943  | 57.47824 | 56.35424 | 40.17829 | 66.31243 | 47.23404 |
| 22864 | APEX2     | 1043.308 | -0.0677  | 0.115964 | -0.58383 | 0.559337 | 0.650367 | 1087.967  | 1083.875 | 1036.64  | 988.8323 | 954.0434 | 1108.492 |
| 24268 | MLKL      | 273.1295 | -0.06772 | 0.184897 | -0.36627 | 0.714164 | 0.782349 | 245.023   | 313.1196 | 281.0755 | 283.4801 | 241.7195 | 274.3594 |
| 22956 | MAPK7     | 1112.083 | -0.06774 | 0.118845 | -0.57003 | 0.568658 | 0.658554 | 1065.742  | 1207.043 | 1144.478 | 1129.456 | 986.13   | 1139.647 |
| 22348 | OXSRI     | 3184.203 | -0.06776 | 0.101581 | -0.66708 | 0.504722 | 0.600413 | 3249.266  | 3379.173 | 3154.446 | 3133.906 | 2825.765 | 3362.661 |
| 24185 | LRFN4     | 1031.895 | -0.06808 | 0.180834 | -0.37645 | 0.706579 | 0.776697 | 1181.748  | 760.355  | 1228.662 | 1073.653 | 870.618  | 1076.333 |
| 22110 | SLC8A1    | 21814.19 | -0.06826 | 0.096597 | -0.70665 | 0.479783 | 0.576863 | 21736.04  | 24537.73 | 20720.97 | 20680.66 | 20717.29 | 22492.45 |
| 24016 | AVPI1     | 320.2318 | -0.06834 | 0.169206 | -0.4038  |          |          |           |          |          |          |          |          |



|       |           |          |          |          |          |          |          |          |          |          |          |          |          |
|-------|-----------|----------|----------|----------|----------|----------|----------|----------|----------|----------|----------|----------|----------|
| 25654 | LOC11961f | 31.05601 | -0.06869 | 0.485489 | -0.14149 | 0.88748  | 0.919687 | 33.06727 | 29.56024 | 31.30791 | 37.94616 | 36.36488 | 18.08963 |
| 21886 | KBTBD2    | 4105.887 | -0.06871 | 0.092024 | -0.74665 | 0.455274 | 0.553045 | 4445.65  | 4165.256 | 4003.238 | 3854.883 | 4008.693 | 4157.6   |
| 26118 | CNR1      | 6.787156 | -0.06875 | 1.001122 | -0.06867 | 0.945252 | 0.96218  | 8.673382 | 5.474118 | 6.261582 | 4.464254 | 12.83466 | 3.014938 |
| 24707 | ZNF670    | 162.9159 | -0.06899 | 0.231825 | -0.29761 | 0.766004 | 0.824229 | 173.4676 | 169.6977 | 160.0182 | 120.5349 | 166.8506 | 186.9262 |
| 26307 | LOC10322f | 2.507777 | -0.06903 | 1.703403 | -0.04053 | 0.967673 | 0.977922 | 5.96295  | 1.094824 | 0.695731 | 0        | 4.278221 | 3.014938 |
| 23621 | MRPL17    | 3086.757 | -0.0691  | 0.148374 | -0.4657  | 0.641433 | 0.721923 | 3452.006 | 2380.694 | 3649.807 | 3100.424 | 2932.721 | 3004.889 |
| 26133 | LOC11962f | 6.158669 | -0.06919 | 1.047304 | -0.06606 | 0.947328 | 0.963713 | 9.757555 | 6.02153  | 3.478657 | 2.232127 | 6.417332 | 9.044815 |
| 25495 | LOC10324f | 37.3903  | -0.06929 | 0.420713 | -0.1647  | 0.869178 | 0.906338 | 42.82482 | 40.50847 | 32.00364 | 35.71403 | 32.08666 | 41.20416 |
| 22751 | TCF4      | 3015.456 | -0.06967 | 0.115992 | -0.60062 | 0.548093 | 0.64046  | 2892.573 | 3541.754 | 2833.018 | 2799.087 | 2936.999 | 3089.307 |
| 25298 | LOC10324f | 62.70885 | -0.06978 | 0.350154 | -0.19928 | 0.842044 | 0.884847 | 75.35001 | 69.5213  | 48.7012  | 53.57105 | 57.75599 | 71.35354 |
| 21798 | GALNT1    | 6896.071 | -0.0699  | 0.091975 | -0.76001 | 0.44725  | 0.545469 | 7012.429 | 7506.111 | 6675.543 | 6582.542 | 6498.618 | 7101.185 |
| 23176 | TRIM9     | 549.2509 | -0.07012 | 0.1314   | -0.53364 | 0.59359  | 0.680936 | 578.4062 | 574.7824 | 535.0174 | 524.5498 | 539.0559 | 543.6939 |
| 22961 | YTHDC2    | 1894.857 | -0.07033 | 0.123458 | -0.56965 | 0.568913 | 0.658706 | 1788.343 | 2221.397 | 1817.25  | 1814.719 | 1730.541 | 1996.894 |
| 23332 | ATG3      | 3168.945 | -0.0704  | 0.138334 | -0.50888 | 0.610835 | 0.695992 | 2812.344 | 3926.585 | 2995.124 | 3194.174 | 3300.648 | 2784.798 |
| 22236 | CRIPT     | 1255.756 | -0.07043 | 0.102586 | -0.6865  | 0.492396 | 0.588701 | 1270.65  | 1305.577 | 1280.841 | 1229.902 | 1255.658 | 1191.906 |
| 22776 | SIRT5     | 1081.574 | -0.07043 | 0.118065 | -0.59655 | 0.550805 | 0.642926 | 1174.159 | 999.0266 | 1152.131 | 1051.332 | 1037.469 | 1075.328 |
| 21992 | POLR2F    | 2476.386 | -0.07052 | 0.096741 | -0.72896 | 0.466029 | 0.563333 | 2591.173 | 2411.349 | 2605.514 | 2555.785 | 2350.883 | 2343.612 |
| 25350 | LOC11962f | 133.4073 | -0.07069 | 0.372025 | -0.19002 | 0.849292 | 0.890668 | 90.52842 | 214.038  | 103.664  | 109.3742 | 190.3808 | 92.45811 |
| 22927 | DCLRE1C   | 813.3651 | -0.07084 | 0.123118 | -0.57535 | 0.565055 | 0.65521  | 844.0285 | 883.5227 | 772.2618 | 754.4589 | 829.9749 | 795.9437 |
| 25924 | LOC11962f | 15.15195 | -0.07088 | 0.7043   | -0.10064 | 0.919838 | 0.943285 | 19.51511 | 14.23271 | 13.2189  | 4.464254 | 21.39111 | 18.08963 |
| 22559 | LOXL1     | 7784.563 | -0.07102 | 0.112515 | -0.6312  | 0.52791  | 0.622124 | 8514.551 | 7081.867 | 8339.036 | 7491.018 | 6894.354 | 8386.554 |
| 22414 | KLHDC2    | 2152.757 | -0.07103 | 0.108504 | -0.65459 | 0.51273  | 0.608191 | 2320.13  | 2003.527 | 2298.696 | 2013.379 | 2040.712 | 2240.099 |
| 25825 | LOC10323f | 19.30913 | -0.07105 | 0.610589 | -0.11636 | 0.907366 | 0.934069 | 21.14137 | 17.51718 | 20.17621 | 31.24978 | 10.69555 | 15.07469 |
| 24514 | LOC11962f | 756.297  | -0.07112 | 0.215852 | -0.32951 | 0.741773 | 0.80444  | 1003.402 | 498.6922 | 825.1374 | 687.4951 | 690.9327 | 832.123  |
| 23221 | LOC10323f | 647.5422 | -0.07113 | 0.135123 | -0.52641 | 0.598606 | 0.685335 | 654.8403 | 709.9931 | 627.5497 | 660.7096 | 566.8643 | 665.2964 |
| 22902 | NIBAN2    | 16591.59 | -0.07115 | 0.122874 | -0.57907 | 0.562542 | 0.653008 | 18526.34 | 14683.23 | 17799.59 | 16019.98 | 14252.89 | 18267.51 |
| 23706 | LOC10323f | 1558.755 | -0.07127 | 0.157365 | -0.45292 | 0.650608 | 0.72964  | 1743.35  | 1492.792 | 1564.004 | 1412.936 | 1229.989 | 1909.461 |
| 22665 | DERPC     | 3926.314 | -0.07145 | 0.116671 | -0.61236 | 0.540297 | 0.633716 | 4515.037 | 3540.112 | 4020.632 | 3676.313 | 3647.184 | 4158.605 |
| 26197 | LOC10324f | 3.963869 | -0.07157 | 1.26628  | -0.05652 | 0.95493  | 0.969037 | 1.626259 | 4.926706 | 5.565851 | 2.232127 | 6.417332 | 3.014938 |
| 23050 | BRD2      | 13915.69 | -0.0716  | 0.12919  | -0.55421 | 0.579435 | 0.668264 | 12606.76 | 17367.19 | 12811.2  | 13399.46 | 12920.23 | 14389.3  |
| 22657 | CHTF8     | 3926.546 | -0.07161 | 0.11667  | -0.61379 | 0.539355 | 0.632862 | 4515.037 | 3540.112 | 4022.023 | 3676.313 | 3647.184 | 4158.605 |
| 22644 | FLNA      | 164872.9 | -0.07199 | 0.11675  | -0.61661 | 0.537495 | 0.631042 | 179093.4 | 151116.3 | 176756.1 | 154650.7 | 143110.8 | 184510.2 |
| 26394 | LOC11962f | 1.478906 | -0.07199 | 2.483888 | -0.02898 | 0.976878 | 0.983965 | 1.626259 | 0        | 2.782925 | 4.464254 | 0        | 0        |
| 26234 | LOC11962f | 3.211832 | -0.07199 | 1.401041 | -0.05139 | 0.959018 | 0.971812 | 3.252518 | 2.189647 | 4.174388 | 2.232127 | 6.417332 | 1.004979 |
| 24248 | DIPK1B    | 836.0157 | -0.07209 | 0.195621 | -0.36854 | 0.71247  | 0.781137 | 1036.469 | 589.0151 | 948.2819 | 763.3874 | 759.3843 | 919.5562 |
| 23472 | SETD6     | 819.5993 | -0.07227 | 0.147916 | -0.48862 | 0.625109 | 0.708014 | 782.2306 | 982.0568 | 757.6515 | 839.2797 | 710.1847 | 846.1927 |
| 23512 | KTI12     | 423.8651 | -0.07229 | 0.150108 | -0.48157 | 0.630111 | 0.712465 | 478.1202 | 410.0114 | 416.0474 | 408.4792 | 406.431  | 424.1013 |
| 25182 | LOC11962f | 74.51894 | -0.07234 | 0.333399 | -0.21696 | 0.828238 | 0.874382 | 89.98634 | 56.38342 | 84.1835  | 66.96381 | 64.17332 | 85.42325 |
| 24930 | LOC10322f | 104.7219 | -0.07238 | 0.280294 | -0.25821 | 0.796243 | 0.849068 | 120.8853 | 85.39624 | 115.4914 | 89.28508 | 119.7902 | 97.48301 |
| 22867 | CDKN3     | 1007.599 | -0.07239 | 0.124069 | -0.58348 | 0.559571 | 0.650564 | 999.0652 | 999.0266 | 1095.081 | 1026.778 | 1050.303 | 875.3371 |
| 22945 | LOC10321f | 1695.664 | -0.07256 | 0.12694  | -0.5716  | 0.56759  | 0.657632 | 1905.434 | 1486.77  | 1826.991 | 1607.131 | 1565.829 | 1781.829 |
| 22570 | ABLIM3    | 5996.273 | -0.0727  | 0.115451 | -0.62971 | 0.528882 | 0.622966 | 5637.698 | 7124.017 | 5683.43  | 5767.816 | 5565.966 | 6198.713 |
| 21803 | NECTIN3   | 3264.611 | -0.0727  | 0.09574  | -0.75939 | 0.447617 | 0.545792 | 3209.151 | 3594.306 | 3240.021 | 3089.264 | 3161.606 | 3293.318 |
| 24664 | BRICD5    | 191.8259 | -0.07273 | 0.23772  | -0.30594 | 0.759654 | 0.818821 | 222.7975 | 146.159  | 222.634  | 187.4987 | 166.8506 | 205.0158 |
| 23211 | PHLDA2    | 646.2873 | -0.07286 | 0.138006 | -0.52795 | 0.597533 | 0.684391 | 683.0288 | 599.4159 | 708.9503 | 624.9956 | 583.9772 | 677.3562 |
| 22338 | NAPB      | 1147.292 | -0.07334 | 0.109705 | -0.66853 | 0.503794 | 0.599577 | 1134.045 | 1248.646 | 1146.565 | 1149.545 | 1082.39  | 1122.562 |
| 22021 | SUB1      | 4858.215 | -0.07341 | 0.101629 | -0.72231 | 0.470102 | 0.567533 | 4988.821 | 4629.462 | 5320.954 | 5002.197 | 4864.338 | 4343.521 |
| 24100 | IGFLR1    | 219.6218 | -0.0735  | 0.188055 | -0.39083 | 0.695922 | 0.76768  | 220.6292 | 219.5121 | 235.8529 | 232.1412 | 192.52   | 217.0756 |
| 21984 | NRAS      | 8154.005 | -0.07358 | 0.100751 | -0.73029 | 0.465211 | 0.562574 | 7892.778 | 9389.755 | 7801.932 | 7908.426 | 8043.056 | 7888.084 |
| 25996 | TRNAR-AC  | 10.54951 | -0.07359 | 0.843687 | -0.08722 | 0.930494 | 0.951558 | 15.17842 | 4.379295 | 12.52316 | 15.62489 | 8.556443 | 7.034856 |
| 25512 | NICALD    | 35.68529 | -0.07368 | 0.453084 | -0.16261 | 0.870824 | 0.907376 | 42.82482 | 34.48694 | 32.00364 | 49.10679 | 23.53022 | 32.15934 |
| 22114 | NEDD4     | 8532.412 | -0.07369 | 0.104353 | -0.70619 | 0.480067 | 0.577101 | 8344.878 | 9862.719 | 8046.133 | 8071.371 | 8169.264 | 8700.107 |
| 22659 | ZNF605    | 1014.73  | -0.07379 | 0.120277 | -0.61347 | 0.539564 | 0.633051 | 1033.217 | 1139.711 | 948.2819 | 986.6001 | 994.6865 | 985.8849 |
| 23483 | PABIR1    | 798.2596 | -0.07383 | 0.151531 | -0.48724 | 0.626087 | 0.708768 | 744.8267 | 989.7206 | 721.4734 | 774.5481 | 770.0798 | 788.9089 |
| 21888 | PAIP2     | 4683.378 | -0.0741  | 0.099288 | -0.74631 | 0.455478 | 0.55322  | 4453.24  | 5269.934 | 4684.359 | 4656.217 | 4639.731 | 4396.785 |
| 23225 | TBL3      | 1628.281 | -0.07417 | 0.141069 | -0.52576 | 0.599057 | 0.685724 | 1810.568 | 1419.986 | 1785.942 | 1562.489 | 1379.726 | 1810.973 |
| 25167 | LOC10322f | 63.04429 | -0.07431 | 0.338802 | -0.21932 | 0.826402 | 0.872965 | 62.88202 | 77.73248 | 52.87558 | 58.0353  | 68.45154 | 58.28881 |
| 23023 | RPGRIP1L  | 1986.554 | -0.07437 | 0.133096 | -0.55874 | 0.576342 | 0.665511 | 1834.962 | 2451.858 | 1826.295 | 1926.326 | 1925.2   | 1954.685 |
| 26214 | TRNAY-GU  | 3.958    | -0.07438 | 1.386625 | -0.05364 | 0.957222 | 0.97077  | 0.542086 | 8.758589 | 2.782925 | 2.232127 | 6.417332 | 3.014938 |
| 23680 | MOAP1     | 327.2851 | -0.07443 | 0.163088 | -0.45636 | 0.648128 | 0.727639 | 360.4874 | 338.3005 | 307.5133 | 334.819  | 308.0319 | 314.5586 |
| 23319 | KIAA1328  | 917.8097 | -0.07447 | 0.145769 | -0.51085 | 0.609456 | 0.694815 | 875.4695 | 1117.815 | 833.4862 | 857.1368 | 864.2007 | 958.7504 |
| 25507 | GPR157    | 44.48803 | -0.07448 | 0.456872 | -0.16302 | 0.8705   | 0.907219 | 43.36691 | 38.86624 | 52.87558 | 69.19594 | 38.50399 | 24.11951 |
| 23097 | AP3B2     | 585.4079 | -0.07453 | 0.136681 | -0.54526 | 0.585576 | 0.674007 | 585.9954 | 642.6615 | 576.0656 | 524.5498 | 571.1425 | 612.0325 |
| 23646 | SS18L2    | 735.438  | -0.07454 | 0.161349 | -0.462   | 0.644081 | 0.724135 | 806.0824 | 590.6573 | 867.577  | 696.4236 | 727.2976 | 724.5902 |
| 24208 | UPF3B     | 514.7304 | -0.07464 | 0.199983 | -0.37322 | 0.708983 | 0.778599 | 453.7263 | 700.1397 | 427.8748 | 542.4069 | 506.9692 | 457.2657 |
| 23154 | CUNH2orf  | 776.6326 | -0.07469 | 0.139249 | -0.53634 | 0.591721 | 0.679403 | 850.5335 | 715.4672 | 823.0502 | 687.4951 | 855.6443 | 727.6051 |
| 22973 | IPPK      | 722.6657 | -0.07487 | 0.131699 | -0.5685  | 0.569696 | 0.659256 | 816.9242 | 699.0449 | 710.3417 | 660.7096 | 712.3239 | 736.65   |
| 21571 | XBP1      | 4338.499 | -0.07487 | 0.094348 | -0.79359 | 0.427434 | 0.526787 | 4413.667 | 4744.966 | 4198.043 | 4196.399 | 4060.032 | 4417.89  |
| 23240 | ZC3H14    | 5419.097 | -0.0749  | 0.143176 | -0.52313 | 0.600883 | 0.687341 | 4829.447 | 7011.251 | 4839.507 | 5310.23  | 5026.91  | 5497.238 |
| 21639 | POLR2M    | 1704.909 | -0.07491 | 0.095595 | -0.78367 | 0.433233 | 0.532237 | 1781.296 | 1712.304 | 1754.635 | 1636.149 | 1672.785 | 1672.286 |
| 20461 | RCAN1     | 18354.49 | -0.07507 | 0.078836 | -0.95228 |          |          |          |          |          |          |          |          |



|       |           |          |          |          |          |          |          |          |          |          |          |          |          |
|-------|-----------|----------|----------|----------|----------|----------|----------|----------|----------|----------|----------|----------|----------|
| 25555 | LOC103231 | 29.35802 | -0.07539 | 0.480199 | -0.157   | 0.875246 | 0.910523 | 30.89892 | 25.18094 | 33.39511 | 33.4819  | 32.08666 | 21.10457 |
| 22611 | LOC103247 | 833.3588 | -0.07552 | 0.121228 | -0.62298 | 0.533296 | 0.626997 | 820.7188 | 902.1347 | 839.052  | 861.601  | 812.8621 | 763.7844 |
| 23031 | LOC103231 | 738.359  | -0.07562 | 0.135842 | -0.55668 | 0.577743 | 0.666897 | 725.8536 | 822.76   | 724.9521 | 638.3883 | 793.6101 | 724.5902 |
| 21421 | TPM3      | 15368.37 | -0.07571 | 0.092945 | -0.81455 | 0.415328 | 0.515413 | 15046.69 | 17306.42 | 14963.79 | 14758.82 | 14717.08 | 15417.39 |
| 24605 | LOC119621 | 447.7146 | -0.07572 | 0.239991 | -0.3155  | 0.752385 | 0.81293  | 475.4097 | 291.7705 | 613.6351 | 441.9611 | 370.0661 | 493.4449 |
| 24588 | PLIN1     | 172.6305 | -0.07577 | 0.237941 | -0.31842 | 0.750167 | 0.811109 | 217.3766 | 139.59   | 175.3243 | 165.1774 | 160.4333 | 177.8814 |
| 22452 | PORVA     | 3820.462 | -0.07577 | 0.116723 | -0.64918 | 0.516222 | 0.611248 | 3675.346 | 4473.997 | 3617.803 | 3488.814 | 3625.793 | 4041.022 |
| 25050 | LOC119621 | 71.08066 | -0.07583 | 0.319192 | -0.23755 | 0.812227 | 0.861998 | 69.92914 | 72.25836 | 78.61764 | 62.49956 | 57.75599 | 85.42325 |
| 23484 | CCDC77    | 560.2078 | -0.07594 | 0.155586 | -0.48723 | 0.626094 | 0.708768 | 512.2716 | 672.2217 | 538.4961 | 535.7105 | 583.9772 | 518.5694 |
| 23051 | LZIC      | 1850.255 | -0.0761  | 0.137328 | -0.55418 | 0.579456 | 0.668264 | 1720.582 | 2305.699 | 1669.755 | 1796.862 | 1826.801 | 1781.829 |
| 25491 | LOC103221 | 33.55778 | -0.07611 | 0.459327 | -0.1657  | 0.868394 | 0.905663 | 41.19856 | 28.46541 | 34.78657 | 29.01765 | 25.66933 | 42.20914 |
| 22451 | LOC103247 | 2476.531 | -0.07614 | 0.117268 | -0.64927 | 0.516161 | 0.611204 | 2347.234 | 2908.946 | 2372.444 | 2350.43  | 2329.492 | 2550.638 |
| 23722 | F8A1      | 996.2317 | -0.07617 | 0.169221 | -0.45011 | 0.652629 | 0.731364 | 867.8803 | 1306.125 | 894.7105 | 1006.689 | 874.8963 | 1027.089 |
| 23482 | LOC119621 | 6619.517 | -0.0763  | 0.156557 | -0.48736 | 0.626006 | 0.708729 | 8201.225 | 4948.603 | 7236.302 | 6162.903 | 6288.985 | 6879.084 |
| 22117 | ATP11A    | 2741.355 | -0.07643 | 0.108241 | -0.70608 | 0.480141 | 0.577137 | 2630.203 | 3096.161 | 2718.918 | 2709.802 | 2477.09  | 2815.952 |
| 23667 | MAP3K10   | 667.4858 | -0.07668 | 0.166857 | -0.45956 | 0.64583  | 0.725457 | 767.5943 | 545.2222 | 746.5198 | 629.4598 | 592.5337 | 723.5852 |
| 22552 | PEX14     | 1037.446 | -0.07669 | 0.121389 | -0.63179 | 0.527521 | 0.621859 | 1046.227 | 1141.901 | 1010.898 | 1011.154 | 924.0958 | 1090.403 |
| 25451 | LOC119621 | 37.51698 | -0.0768  | 0.447642 | -0.17156 | 0.863782 | 0.902269 | 43.36691 | 29.56024 | 41.74388 | 51.33892 | 29.94755 | 29.1444  |
| 22277 | MSI2      | 5563.989 | -0.07689 | 0.113497 | -0.67749 | 0.498096 | 0.594419 | 5332.504 | 6621.493 | 5183.894 | 5381.658 | 5285.742 | 5578.641 |
| 25145 | LOC103231 | 92.17586 | -0.0769  | 0.345606 | -0.22252 | 0.823908 | 0.871091 | 112.754  | 56.38342 | 115.4914 | 98.21359 | 72.72976 | 97.48301 |
| 21794 | UBE3A     | 6772.069 | -0.07702 | 0.101279 | -0.76044 | 0.446991 | 0.545203 | 6605.864 | 7771.058 | 6483.521 | 6506.65  | 6451.558 | 6813.761 |
| 25536 | LOC103247 | 43.25483 | -0.0771  | 0.482182 | -0.15989 | 0.872969 | 0.908794 | 47.7036  | 21.34906 | 64.00729 | 37.94616 | 51.33866 | 37.18424 |
| 21259 | GLOD4     | 3493.621 | -0.07729 | 0.0919   | -0.84104 | 0.400326 | 0.50062  | 3717.628 | 3483.181 | 3566.319 | 3270.066 | 3332.734 | 3591.797 |
| 23160 | ZFP82     | 460.6951 | -0.07738 | 0.144417 | -0.53581 | 0.592088 | 0.679649 | 474.3256 | 481.7224 | 460.5742 | 497.7643 | 425.683  | 424.1013 |
| 22633 | PCED1A    | 1837.135 | -0.07739 | 0.125152 | -0.61841 | 0.536308 | 0.629954 | 1822.494 | 2030.35  | 1811.684 | 1852.665 | 1518.769 | 1986.844 |
| 23812 | MACROD1   | 240.7788 | -0.07741 | 0.177954 | -0.43497 | 0.663581 | 0.740827 | 239.6022 | 261.1154 | 241.4188 | 236.6055 | 226.7457 | 239.1851 |
| 23698 | UBE2V1    | 1528.631 | -0.07752 | 0.170845 | -0.45375 | 0.650006 | 0.729192 | 1280.408 | 2077.975 | 1349.719 | 1522.311 | 1478.125 | 1463.25  |
| 22774 | ZNF181    | 590.4263 | -0.07754 | 0.12994  | -0.5967  | 0.550706 | 0.642861 | 611.4734 | 621.3124 | 587.1973 | 535.7105 | 598.951  | 587.913  |
| 22779 | QRICH1    | 5191.863 | -0.07766 | 0.130267 | -0.59612 | 0.551094 | 0.643173 | 4877.151 | 6438.658 | 4681.576 | 4899.519 | 4851.503 | 5402.77  |
| 22553 | PIGO      | 2431.422 | -0.07769 | 0.122983 | -0.63173 | 0.527565 | 0.621882 | 2786.324 | 2195.121 | 2515.069 | 2232.127 | 2243.927 | 2615.962 |
| 25800 | FGF7      | 17.04966 | -0.07778 | 0.648247 | -0.11999 | 0.904495 | 0.932015 | 14.63633 | 14.78012 | 22.2634  | 22.32127 | 19.252   | 9.044815 |
| 22952 | TRIM11    | 922.7561 | -0.07779 | 0.136254 | -0.57091 | 0.568062 | 0.657979 | 1015.328 | 846.8461 | 986.5471 | 839.2797 | 838.5314 | 1010.004 |
| 25584 | ADM5      | 30.93071 | -0.07792 | 0.506269 | -0.15392 | 0.877674 | 0.912014 | 18.97302 | 36.67659 | 40.35242 | 22.32127 | 32.08666 | 35.17428 |
| 21747 | PGK1      | 20617.47 | -0.078   | 0.101308 | -0.76993 | 0.44134  | 0.539499 | 22850.57 | 18756.52 | 21921.8  | 19517.72 | 19487.3  | 21170.9  |
| 21535 | TMEM87B   | 1750.713 | -0.07803 | 0.097598 | -0.79952 | 0.42399  | 0.523416 | 1811.653 | 1849.705 | 1735.154 | 1671.863 | 1679.202 | 1756.704 |
| 21272 | SNX1      | 5052.89  | -0.07808 | 0.092992 | -0.83965 | 0.401107 | 0.501289 | 5018.636 | 5589.075 | 4963.348 | 4738.806 | 4958.459 | 5049.017 |
| 23531 | GON7      | 343.2502 | -0.07814 | 0.163448 | -0.47808 | 0.632591 | 0.714566 | 358.8612 | 320.2359 | 377.0864 | 361.6046 | 325.1448 | 316.5685 |
| 22653 | ZBTB9     | 957.3632 | -0.07816 | 0.127146 | -0.61471 | 0.538746 | 0.632258 | 1014.244 | 955.2336 | 985.8514 | 939.7255 | 815.0012 | 1034.124 |
| 21963 | BEX4      | 2822.667 | -0.07819 | 0.106578 | -0.73367 | 0.463149 | 0.560617 | 2716.937 | 3235.751 | 2742.573 | 2830.337 | 2723.088 | 2687.315 |
| 23603 | EMSY      | 1129.496 | -0.0782  | 0.167178 | -0.46775 | 0.639966 | 0.720819 | 1029.422 | 1493.339 | 958.0221 | 1116.063 | 1037.469 | 1142.662 |
| 21248 | LTN1      | 6580.884 | -0.07824 | 0.092922 | -0.84199 | 0.399791 | 0.500211 | 6784.753 | 6936.255 | 6564.921 | 6127.189 | 6115.717 | 6956.468 |
| 23907 | LOC103231 | 324.846  | -0.07833 | 0.185728 | -0.42177 | 0.673194 | 0.748603 | 378.9184 | 275.3481 | 347.8657 | 283.4801 | 335.8404 | 327.6233 |
| 23963 | LOC103247 | 365.6132 | -0.0784  | 0.189854 | -0.41293 | 0.679656 | 0.754023 | 422.8274 | 289.0334 | 416.0474 | 352.6761 | 342.2577 | 370.8374 |
| 22561 | TESK1     | 1161.07  | -0.0784  | 0.124264 | -0.6309  | 0.528106 | 0.6223   | 1089.594 | 1315.431 | 1177.177 | 1093.742 | 1067.416 | 1223.06  |
| 21916 | RPRD1B    | 1325.378 | -0.07847 | 0.105793 | -0.74172 | 0.458258 | 0.555885 | 1389.909 | 1364.698 | 1333.021 | 1301.33  | 1208.598 | 1354.712 |
| 22131 | B3GNT2    | 1090.893 | -0.07857 | 0.111671 | -0.70356 | 0.481706 | 0.578652 | 1142.718 | 1162.155 | 1059.599 | 1020.082 | 1050.303 | 1110.502 |
| 20854 | SEC22B    | 4023.837 | -0.07861 | 0.087548 | -0.89793 | 0.369225 | 0.470694 | 4199.001 | 4154.308 | 4051.244 | 3734.348 | 3935.964 | 4068.157 |
| 23707 | LOC103247 | 1047.08  | -0.07871 | 0.173809 | -0.45284 | 0.650665 | 0.729655 | 1254.388 | 804.148  | 1172.307 | 991.0644 | 904.8438 | 1155.726 |
| 24215 | LOC119611 | 333.4754 | -0.07873 | 0.211951 | -0.37143 | 0.710314 | 0.779834 | 393.5547 | 250.1672 | 384.7394 | 281.248  | 361.5097 | 329.6333 |
| 22537 | CABLES2   | 908.6282 | -0.07874 | 0.124019 | -0.63488 | 0.525504 | 0.619866 | 938.3515 | 1010.522 | 853.6624 | 870.5295 | 847.0878 | 931.616  |
| 26041 | LOC119621 | 7.611451 | -0.07877 | 0.983499 | -0.08009 | 0.936164 | 0.955742 | 4.336691 | 5.474118 | 13.2189  | 8.928508 | 10.69555 | 3.014938 |
| 26016 | LOC119621 | 7.316639 | -0.07881 | 0.941611 | -0.0837  | 0.933294 | 0.95367  | 4.878777 | 7.116354 | 10.43597 | 11.16063 | 4.278221 | 6.029877 |
| 22136 | CLCN6     | 1290.628 | -0.07883 | 0.1122   | -0.70257 | 0.482325 | 0.579239 | 1336.243 | 1371.267 | 1274.58  | 1261.152 | 1150.842 | 1349.687 |
| 20655 | LOC119621 | 8523.877 | -0.07883 | 0.084958 | -0.92792 | 0.353451 | 0.454926 | 8900.516 | 9007.114 | 8366.865 | 8111.549 | 8109.369 | 8647.848 |
| 25725 | ARL9      | 17.76091 | -0.07885 | 0.602303 | -0.13092 | 0.895838 | 0.925786 | 16.26259 | 16.42235 | 21.56767 | 17.85702 | 21.39111 | 13.06473 |
| 23245 | PGAM1     | 10149.63 | -0.07889 | 0.150906 | -0.52278 | 0.60113  | 0.687503 | 12039.2  | 7797.881 | 11447.56 | 10037.88 | 8843.083 | 10732.18 |
| 24129 | HYAL3     | 179.5678 | -0.07893 | 0.204623 | -0.38573 | 0.699699 | 0.770919 | 188.6461 | 174.6244 | 190.6304 | 156.2489 | 190.3808 | 176.8764 |
| 22163 | NDUFB4    | 5202.642 | -0.07905 | 0.113288 | -0.69778 | 0.485312 | 0.582142 | 5639.867 | 4540.234 | 5855.971 | 5147.285 | 4973.432 | 5059.067 |
| 22346 | GON4L     | 2569.807 | -0.07911 | 0.118508 | -0.66754 | 0.504428 | 0.600117 | 2472.456 | 3061.674 | 2385.663 | 2513.375 | 2496.342 | 2489.334 |
| 21982 | STARD13   | 3584.746 | -0.07922 | 0.108422 | -0.7307  | 0.464965 | 0.562302 | 3822.251 | 3508.362 | 3726.337 | 3488.814 | 3099.571 | 3863.141 |
| 22332 | LOC103211 | 4197.503 | -0.07929 | 0.1184   | -0.66971 | 0.503044 | 0.598845 | 4734.04  | 3816.008 | 4395.631 | 3870.508 | 3801.2   | 4567.632 |
| 22919 | CDK10     | 1419.62  | -0.07957 | 0.138025 | -0.57649 | 0.564286 | 0.654547 | 1633.848 | 1288.06  | 1461.036 | 1267.848 | 1277.049 | 1589.878 |
| 22085 | IMMT      | 7219.925 | -0.07976 | 0.112032 | -0.7119  | 0.476525 | 0.573621 | 6957.136 | 8546.193 | 6757.639 | 6939.683 | 6740.338 | 7378.559 |
| 25378 | VWC2      | 39.84909 | -0.07991 | 0.431651 | -0.18512 | 0.853138 | 0.893714 | 37.40396 | 47.07742 | 36.87376 | 42.41041 | 49.19955 | 26.12947 |
| 21478 | TMEM1061  | 5153.884 | -0.07998 | 0.099065 | -0.8073  | 0.419494 | 0.519241 | 4949.249 | 5871.539 | 5068.403 | 5024.518 | 5026.91  | 4982.688 |
| 25837 | ABCD2     | 13.01188 | -0.08009 | 0.70307  | -0.11392 | 0.909302 | 0.935591 | 11.9259  | 13.6853  | 13.91463 | 13.39276 | 17.11289 | 8.039836 |
| 22125 | SNX15     | 1278.023 | -0.08013 | 0.113718 | -0.70465 | 0.481031 | 0.577998 | 1339.495 | 1301.745 | 1305.888 | 1191.956 | 1157.259 | 1371.797 |
| 27562 | LOC119621 | 0.719887 | -0.08013 | 3.592683 | -0.0223  | 0.982205 | NA       | 0        | 0        | 2.087194 | 2.232127 | 0        | 0        |
| 27753 | LOC119621 | 0.719887 | -0.08013 | 3.592683 | -0.0223  | 0.982205 | NA       | 0        | 0        | 2.087194 | 2.232127 | 0        | 0        |
| 29172 | LOC103231 | 0.719887 | -0.08013 | 3.592683 | -0.0223  | 0.982205 | NA       | 0        | 0        | 2.087194 | 2.232127 | 0        | 0        |
| 20657 | PSMD8     | 6486.609 | -0.08036 | 0.086625 | -0.92767 | 0.353578 | 0.455045 | 6892.628 | 6290.857 | 68       |          |          |          |



|       |           |          |          |          |          |          |          |          |          |          |          |          |          |
|-------|-----------|----------|----------|----------|----------|----------|----------|----------|----------|----------|----------|----------|----------|
| 24370 | LOC119615 | 148.3949 | -0.08056 | 0.229485 | -0.35104 | 0.72556  | 0.791507 | 139.3162 | 169.1503 | 150.278  | 151.7846 | 124.0684 | 155.7718 |
| 25527 | LOC119622 | 25.5205  | -0.08065 | 0.500382 | -0.16117 | 0.871959 | 0.908063 | 24.93597 | 22.44388 | 31.30791 | 26.78552 | 23.53022 | 24.11951 |
| 25756 | TRNAE-CU  | 21.96129 | -0.08074 | 0.638256 | -0.12651 | 0.899332 | 0.928279 | 26.02015 | 11.49565 | 31.30791 | 20.08914 | 10.69555 | 32.15934 |
| 21935 | WDR89     | 1928.319 | -0.08075 | 0.109423 | -0.73796 | 0.460539 | 0.558168 | 1952.053 | 2179.246 | 1817.25  | 1859.362 | 1820.383 | 1941.62  |
| 26218 | COLEC11   | 2.937762 | -0.0808  | 1.519415 | -0.05318 | 0.95759  | 0.970958 | 4.336691 | 1.642235 | 3.478657 | 0        | 2.139111 | 6.029877 |
| 25530 | CCDC96    | 31.26864 | -0.08085 | 0.503391 | -0.1606  | 0.872407 | 0.908458 | 21.14137 | 33.93953 | 40.35242 | 35.71403 | 36.36488 | 20.09959 |
| 22073 | EYA4      | 2116.377 | -0.08101 | 0.113534 | -0.71355 | 0.475506 | 0.572681 | 2121.184 | 2426.129 | 1982.834 | 2037.932 | 1959.425 | 2170.756 |
| 22265 | RMND1     | 1110.024 | -0.08116 | 0.119303 | -0.68031 | 0.496308 | 0.592605 | 1163.859 | 1210.875 | 1047.076 | 1022.314 | 1165.815 | 1050.204 |
| 21144 | DUSP5     | 5931.814 | -0.08126 | 0.094618 | -0.85882 | 0.39044  | 0.490912 | 6276.276 | 5994.707 | 6034.078 | 5468.711 | 5518.906 | 6298.206 |
| 22592 | TRIAP1    | 1049.343 | -0.08133 | 0.130009 | -0.6256  | 0.531574 | 0.625499 | 1149.765 | 924.0311 | 1163.263 | 1002.225 | 1041.747 | 1015.029 |
| 21751 | PDZD4     | 3081.944 | -0.08134 | 0.105869 | -0.76832 | 0.442295 | 0.540591 | 3241.134 | 2968.067 | 3302.637 | 3073.639 | 2695.279 | 3210.909 |
| 25831 | LOC119623 | 17.73461 | -0.08137 | 0.70901  | -0.11476 | 0.908632 | 0.935155 | 14.09425 | 18.612   | 20.87194 | 17.85702 | 29.94755 | 5.024897 |
| 22891 | CDYL      | 1708.181 | -0.08165 | 0.140612 | -0.58066 | 0.561469 | 0.652075 | 1576.929 | 2127.242 | 1566.091 | 1725.434 | 1535.881 | 1717.51  |
| 22425 | RAB33B    | 856.5966 | -0.08179 | 0.125392 | -0.65226 | 0.514231 | 0.609584 | 912.3314 | 796.4842 | 936.4544 | 828.1191 | 797.8883 | 868.3023 |
| 21043 | SUN1      | 7580.557 | -0.08194 | 0.093675 | -0.87471 | 0.381733 | 0.482275 | 7976.259 | 7773.795 | 7646.088 | 7011.111 | 7014.144 | 8061.945 |
| 23172 | SYNGR2    | 1540.804 | -0.082   | 0.153617 | -0.53378 | 0.593492 | 0.680878 | 1715.703 | 1385.499 | 1660.711 | 1379.454 | 1266.354 | 1837.102 |
| 21570 | BRWD1     | 7428.486 | -0.082   | 0.103289 | -0.79389 | 0.427262 | 0.5266   | 7432.004 | 8540.719 | 6948.269 | 7124.949 | 7007.727 | 7517.246 |
| 24180 | GCAT      | 232.6882 | -0.08219 | 0.217968 | -0.37705 | 0.706133 | 0.77632  | 249.9018 | 197.0683 | 269.9438 | 276.7837 | 190.3808 | 212.0507 |
| 21230 | RLIM      | 7581.941 | -0.08232 | 0.097217 | -0.84676 | 0.397128 | 0.497299 | 7673.775 | 8390.181 | 7336.487 | 6946.379 | 7253.724 | 7891.099 |
| 22832 | TNFRSF1B  | 510.831  | -0.08238 | 0.140036 | -0.58825 | 0.556366 | 0.64781  | 551.3018 | 540.2955 | 484.229  | 520.0856 | 470.6043 | 498.4698 |
| 22831 | LOC103216 | 665.0763 | -0.0824  | 0.140083 | -0.58821 | 0.556392 | 0.64781  | 642.3723 | 719.2991 | 694.3399 | 669.6381 | 558.3079 | 706.5006 |
| 24677 | GNB1L     | 184.0976 | -0.08243 | 0.272048 | -0.303   | 0.761886 | 0.820794 | 225.5079 | 122.6202 | 219.1554 | 212.0521 | 160.4333 | 164.8166 |
| 21688 | TP53BP1   | 7051.552 | -0.08269 | 0.10615  | -0.77903 | 0.435965 | 0.534403 | 7051.459 | 8095.126 | 6618.493 | 6703.077 | 6517.87  | 7323.285 |
| 22585 | USP7      | 8116.772 | -0.08287 | 0.132315 | -0.62632 | 0.531104 | 0.625167 | 7293.772 | 10266.71 | 7490.244 | 7613.785 | 7867.649 | 8168.473 |
| 24354 | FGFBP3    | 149.2181 | -0.08287 | 0.234637 | -0.3532  | 0.723942 | 0.790227 | 151.2421 | 171.8873 | 134.9719 | 160.7131 | 151.8769 | 124.6175 |
| 20982 | SFXN1     | 3034.138 | -0.08334 | 0.09457  | -0.88128 | 0.378164 | 0.479126 | 3177.71  | 3207.286 | 2984.688 | 2785.694 | 2954.112 | 3095.337 |
| 22485 | NCKIPSD   | 1104.931 | -0.08341 | 0.130108 | -0.64111 | 0.521453 | 0.616518 | 1123.203 | 1139.711 | 1150.74  | 1174.099 | 894.1483 | 1147.687 |
| 21755 | MAN1B1    | 6190.512 | -0.08359 | 0.108885 | -0.76768 | 0.442677 | 0.54096  | 6773.911 | 5847.453 | 6496.044 | 5863.798 | 5469.706 | 6692.158 |
| 21035 | FBXO38    | 3453.018 | -0.08365 | 0.095572 | -0.8753  | 0.381411 | 0.482013 | 3459.053 | 3771.12  | 3434.13  | 3265.602 | 3238.614 | 3549.587 |
| 25938 | LOC119623 | 10.20045 | -0.08393 | 0.850441 | -0.09869 | 0.921385 | 0.944368 | 7.047123 | 12.59047 | 11.1317  | 17.85702 | 8.556443 | 4.019918 |
| 24763 | LOC103215 | 77.5451  | -0.08403 | 0.291689 | -0.28807 | 0.773292 | 0.830189 | 81.31296 | 76.63765 | 80.70484 | 78.12444 | 79.14709 | 69.34358 |
| 23521 | LOC103226 | 263.4179 | -0.08405 | 0.175167 | -0.47982 | 0.631358 | 0.713603 | 271.5853 | 287.3912 | 252.5505 | 270.0874 | 256.6933 | 242.2001 |
| 21281 | CELF1     | 7730.974 | -0.08421 | 0.100456 | -0.83828 | 0.401874 | 0.502035 | 7889.525 | 8468.461 | 7519.465 | 7131.646 | 7116.821 | 8259.926 |
| 21461 | SBF2      | 4646.147 | -0.08423 | 0.104116 | -0.80896 | 0.418538 | 0.518467 | 5300.041 | 4423.46  | 4366.04  | 4383.038 | 4778.677 |          |
| 25997 | LOC103233 | 6.975747 | -0.08426 | 0.966259 | -0.0872  | 0.930511 | 0.951558 | 7.047123 | 8.211177 | 6.261582 | 11.16063 | 2.139111 | 7.034856 |
| 21870 | ZDHHC13   | 1528.078 | -0.08429 | 0.112458 | -0.74952 | 0.453543 | 0.551324 | 1608.912 | 1413.965 | 1696.193 | 1506.686 | 1450.317 | 1492.395 |
| 21879 | DDX17     | 18049.52 | -0.08438 | 0.112817 | -0.74798 | 0.454472 | 0.552226 | 16889.24 | 21618.39 | 17227    | 16897.2  | 17236.95 | 18428.31 |
| 25435 | LOC119615 | 32.90373 | -0.08449 | 0.481612 | -0.17543 | 0.86074  | 0.899657 | 43.36691 | 22.9913  | 36.17803 | 29.01765 | 25.66933 | 40.19918 |
| 21807 | SF1       | 5727.582 | -0.08452 | 0.111402 | -0.75869 | 0.448038 | 0.546205 | 5345.514 | 6736.997 | 5606.899 | 5377.194 | 5424.785 | 5874.105 |
| 21062 | SLC44A1   | 6197.193 | -0.08454 | 0.097065 | -0.70795 | 0.383781 | 0.484419 | 6178.7   | 7009.608 | 5949.895 | 5932.994 | 5908.224 | 6203.738 |
| 23668 | LOC103217 | 320.412  | -0.08457 | 0.184123 | -0.45929 | 0.646023 | 0.725643 | 371.3292 | 283.0119 | 336.734  | 330.3548 | 267.3888 | 333.6532 |
| 21444 | RNF6      | 2635.212 | -0.08469 | 0.104252 | -0.81235 | 0.416589 | 0.516439 | 2588.462 | 2999.817 | 2550.551 | 2533.464 | 2522.011 | 2616.967 |
| 23750 | AMN1      | 275.9222 | -0.08471 | 0.190458 | -0.44476 | 0.656493 | 0.734857 | 326.336  | 248.525  | 277.5968 | 292.4086 | 235.3022 | 275.3644 |
| 24468 | LOC119623 | 159.9479 | -0.0848  | 0.252613 | -0.33571 | 0.737089 | 0.800863 | 169.673  | 126.4521 | 199.6749 | 129.4634 | 162.5724 | 171.8515 |
| 22193 | SIN3B     | 2572.42  | -0.08489 | 0.122468 | -0.69317 | 0.488206 | 0.584822 | 2697.964 | 2474.301 | 2780.143 | 2468.732 | 2156.224 | 2857.157 |
| 23709 | AKIP1     | 726.1139 | -0.08494 | 0.187674 | -0.45258 | 0.65085  | 0.72977  | 886.3112 | 523.3257 | 832.7905 | 705.3521 | 714.463  | 694.4408 |
| 22298 | NADSYN1   | 1343.696 | -0.08494 | 0.125847 | -0.67497 | 0.499693 | 0.595764 | 1518.926 | 1247.004 | 1389.376 | 1243.295 | 1221.432 | 1442.146 |
| 21627 | CCNT2     | 3491.561 | -0.08504 | 0.108171 | -0.78615 | 0.431779 | 0.530776 | 3387.498 | 4059.059 | 3334.64  | 3361.583 | 3493.168 | 3313.417 |
| 25661 | LOC103216 | 18.19656 | -0.08511 | 0.604653 | -0.14076 | 0.888063 | 0.920041 | 15.17842 | 25.72836 | 15.30609 | 15.62489 | 19.252   | 18.08963 |
| 23719 | VAMP5     | 1046.818 | -0.08522 | 0.189066 | -0.45072 | 0.652191 | 0.730935 | 1180.664 | 738.4585 | 1316.324 | 1024.546 | 930.5131 | 1090.403 |
| 21398 | ZMYM3     | 2413.162 | -0.08522 | 0.10429  | -0.81715 | 0.413846 | 0.514164 | 2437.22  | 2600.754 | 2422.537 | 2216.502 | 2233.232 | 2568.728 |
| 22155 | TMEM19    | 2111.283 | -0.08522 | 0.121967 | -0.69874 | 0.484712 | 0.58158  | 2362.954 | 1874.338 | 2288.26  | 1926.326 | 2012.903 | 2202.915 |
| 22290 | HARS2     | 1943.096 | -0.08533 | 0.126254 | -0.67583 | 0.499151 | 0.595331 | 2202.497 | 1785.11  | 2020.404 | 1830.344 | 1702.732 | 2117.492 |
| 20390 | SNAP23    | 4450.312 | -0.08534 | 0.088597 | -0.96328 | 0.335405 | 0.43731  | 4515.037 | 4757.556 | 4467.987 | 4361.576 | 4479.298 | 4120.416 |
| 22123 | CACHD1    | 2077.179 | -0.08549 | 0.121214 | -0.70532 | 0.48061  | 0.577545 | 2006.804 | 2453.5   | 1959.18  | 1950.879 | 1938.034 | 2154.676 |
| 22486 | USP14     | 3021.461 | -0.08572 | 0.133715 | -0.64411 | 0.52146  | 0.616518 | 2797.708 | 3739.918 | 2798.927 | 2696.409 | 2956.251 | 3139.556 |
| 23066 | GRK2      | 1571.254 | -0.08581 | 0.155616 | -0.55143 | 0.581339 | 0.670029 | 1819.784 | 1328.021 | 1712.891 | 1408.472 | 1343.361 | 1814.993 |
| 24649 | MSS51     | 124.4018 | -0.08587 | 0.279467 | -0.30726 | 0.758642 | 0.818228 | 164.2522 | 106.7453 | 112.7085 | 102.6778 | 145.4595 | 114.5677 |
| 23226 | LOC119618 | 458.755  | -0.08594 | 0.163582 | -0.52539 | 0.599315 | 0.685989 | 428.2482 | 555.0756 | 435.5278 | 417.4077 | 444.935  | 471.3354 |
| 22098 | TRMT10C   | 1617.083 | -0.08615 | 0.121404 | -0.70962 | 0.47794  | 0.574986 | 1738.471 | 1475.275 | 1781.072 | 1473.204 | 1721.984 | 1512.494 |
| 20333 | BCL2L1    | 12650.13 | -0.08621 | 0.088713 | -0.97184 | 0.331129 | 0.432945 | 13140.72 | 13022.93 | 12928.78 | 12004.38 | 11536.22 | 13267.74 |
| 23275 | BCLAF3    | 608.3841 | -0.0864  | 0.167021 | -0.51733 | 0.604928 | 0.690953 | 583.2849 | 769.661  | 525.2772 | 593.7458 | 607.5074 | 570.8283 |
| 22075 | LTA4H     | 3315.564 | -0.08642 | 0.12113  | -0.71344 | 0.475574 | 0.572736 | 3191.262 | 3983.516 | 3072.35  | 3169.62  | 3071.763 | 3404.87  |
| 23167 | VCPKMT    | 499.4961 | -0.08658 | 0.161877 | -0.53484 | 0.592758 | 0.680224 | 596.8371 | 436.8346 | 509.2754 | 464.2824 | 513.3866 | 476.3603 |
| 21912 | SNAPC1    | 1413.065 | -0.08658 | 0.116617 | -0.74247 | 0.457802 | 0.555434 | 1382.32  | 1611.033 | 1369.199 | 1441.954 | 1375.448 | 1298.433 |
| 20797 | CSNK2B    | 3813.028 | -0.0866  | 0.095741 | -0.90457 | 0.365692 | 0.467444 | 3793.52  | 4242.442 | 3749.296 | 3618.278 | 3638.627 | 3836.007 |
| 22558 | SMARCA2   | 3155.646 | -0.08662 | 0.13722  | -0.63128 | 0.52786  | 0.622114 | 2835.112 | 3964.904 | 2953.38  | 3062.478 | 2857.852 | 3260.153 |
| 21809 | SUPT7L    | 2212.762 | -0.08679 | 0.114413 | -0.75861 | 0.448086 | 0.546214 | 2153.709 | 2539.991 | 2149.114 | 2053.557 | 2055.685 | 2324.518 |
| 21614 | IFT140    | 1666.048 | -0.08699 | 0.110304 | -0.78865 | 0.430319 | 0.529288 | 1722.75  | 1679.459 | 1753.243 | 1604.899 | 1463.152 | 1772.784 |
| 22331 | GRK3      | 2131.462 | -0.087   | 0.129898 | -0.66975 | 0.503018 | 0.598841 | 1987.289 | 2592.542 | 2009.968 | 2058.021 | 1938.034 | 2202.915 |
| 22196 | EP300     | 3853.589 | -0.08714 | 0.125791 | -0.69277 |          |          |          |          |          |          |          |          |



|       |           |          |          |          |          |          |          |          |          |          |          |          |          |
|-------|-----------|----------|----------|----------|----------|----------|----------|----------|----------|----------|----------|----------|----------|
| 25068 | LOC119616 | 55.61316 | -0.08734 | 0.371591 | -0.23505 | 0.814167 | 0.863437 | 61.79785 | 52.55153 | 55.65851 | 58.0353  | 68.45154 | 37.18424 |
| 25603 | TMEM272   | 20.32123 | -0.08768 | 0.582008 | -0.15064 | 0.880257 | 0.914019 | 23.30971 | 24.08612 | 14.61036 | 22.32127 | 23.53022 | 14.06971 |
| 20856 | YEATS2    | 3289.202 | -0.08768 | 0.09769  | -0.89758 | 0.369411 | 0.470885 | 3292.091 | 3599.233 | 3281.765 | 3080.335 | 3073.902 | 3407.885 |
| 24120 | SLC23A1   | 145.2891 | -0.08769 | 0.226373 | -0.38735 | 0.698496 | 0.769848 | 155.5788 | 150.5382 | 141.9292 | 129.4634 | 162.5724 | 131.6523 |
| 22469 | ZNF212    | 594.1138 | -0.08771 | 0.135899 | -0.64542 | 0.518658 | 0.613669 | 651.5878 | 584.6358 | 603.8948 | 533.4783 | 569.0034 | 622.0823 |
| 22282 | CHML      | 676.6815 | -0.08782 | 0.129799 | -0.67658 | 0.498675 | 0.594977 | 654.8403 | 754.3335 | 684.5997 | 627.2277 | 656.707  | 682.3811 |
| 21577 | RAC1      | 17354.73 | -0.0879  | 0.110926 | -0.79242 | 0.428118 | 0.527484 | 16236.03 | 20752.38 | 16663.46 | 16580.24 | 16417.67 | 17478.6  |
| 21553 | AMFR      | 8705.136 | -0.08803 | 0.110568 | -0.79615 | 0.425945 | 0.525366 | 9632.875 | 8297.668 | 8989.545 | 8281.191 | 7559.617 | 9469.922 |
| 21467 | PAM       | 5675.542 | -0.0881  | 0.109091 | -0.8076  | 0.419319 | 0.51918  | 5489.709 | 6621.493 | 5439.228 | 5249.963 | 5394.837 | 5858.025 |
| 25523 | SLC17A4   | 24.94719 | -0.08814 | 0.545008 | -0.16172 | 0.871527 | 0.907756 | 30.35684 | 27.37059 | 20.17621 | 26.78552 | 12.83466 | 32.15934 |
| 21007 | NDUFAB1   | 2286.276 | -0.08837 | 0.100604 | -0.87845 | 0.379702 | 0.480632 | 2232.312 | 2295.298 | 2539.42  | 2232.127 | 2273.875 | 2144.626 |
| 24379 | LOC103230 | 204.2947 | -0.08846 | 0.252974 | -0.34969 | 0.726575 | 0.792313 | 239.6022 | 148.3486 | 245.5932 | 209.8199 | 158.2942 | 224.1104 |
| 25707 | LOC119627 | 15.58661 | -0.08854 | 0.661815 | -0.13379 | 0.893571 | 0.92409  | 19.51511 | 15.32753 | 12.52316 | 17.85702 | 19.252   | 9.044815 |
| 22749 | ZNF333    | 426.8351 | -0.08861 | 0.147433 | -0.60105 | 0.547808 | 0.640181 | 460.2313 | 419.8649 | 436.9193 | 441.9611 | 417.1266 | 384.9071 |
| 22188 | ZNF140    | 872.7415 | -0.08863 | 0.127727 | -0.69387 | 0.487766 | 0.584426 | 874.3853 | 1003.406 | 821.6587 | 825.887  | 842.8096 | 868.3023 |
| 21994 | ZNF395    | 1075.91  | -0.0887  | 0.121715 | -0.72876 | 0.46615  | 0.563454 | 1172.533 | 1082.781 | 1076.296 | 1053.564 | 932.6523 | 1137.637 |
| 21153 | PIKFYVE   | 3401.506 | -0.08884 | 0.103537 | -0.85809 | 0.390845 | 0.491212 | 3680.766 | 3583.905 | 3260.197 | 3185.245 | 3108.128 | 3590.792 |
| 22612 | EMC6      | 802.6081 | -0.08886 | 0.142643 | -0.62298 | 0.533295 | 0.626997 | 753.5001 | 956.3284 | 768.7832 | 834.8155 | 778.6363 | 723.5852 |
| 24108 | LOC103216 | 145.1239 | -0.0889  | 0.228321 | -0.38938 | 0.696994 | 0.768607 | 151.7842 | 140.6848 | 158.6268 | 127.2312 | 132.6249 | 159.7917 |
| 21114 | SNX19     | 6460.735 | -0.08935 | 0.10351  | -0.86323 | 0.388013 | 0.488554 | 6561.413 | 7333.676 | 6091.824 | 6051.296 | 6028.014 | 6698.188 |
| 22174 | PLEKHA3   | 562.0367 | -0.0894  | 0.128542 | -0.69549 | 0.486751 | 0.583553 | 568.1065 | 588.4677 | 583.0229 | 537.9426 | 536.9168 | 557.7636 |
| 25740 | FGF19     | 14.59186 | -0.08942 | 0.69441  | -0.12878 | 0.897535 | 0.926994 | 11.38381 | 16.96977 | 16.00182 | 22.32127 | 12.83466 | 8.039836 |
| 24544 | LOC103214 | 100.8991 | -0.08958 | 0.27667  | -0.32379 | 0.746093 | 0.808165 | 120.8853 | 94.70224 | 96.01093 | 84.82083 | 115.512  | 93.46309 |
| 22567 | HSPA12A   | 533.5352 | -0.08959 | 0.142159 | -0.36022 | 0.528553 | 0.62266  | 526.3659 | 610.9116 | 513.4498 | 522.3177 | 500.5519 | 527.6142 |
| 22495 | LYRM1     | 544.1028 | -0.08979 | 0.140348 | -0.63977 | 0.52232  | 0.617287 | 536.1234 | 606.5323 | 537.1046 | 542.4069 | 554.0297 | 488.42   |
| 21219 | CYP20A1   | 2393.217 | -0.08993 | 0.106063 | -0.84794 | 0.396473 | 0.496677 | 2444.267 | 2709.688 | 2247.908 | 2366.055 | 2290.988 | 2300.398 |
| 22910 | PFDN5     | 5049.387 | -0.09007 | 0.15573  | -0.57837 | 0.563012 | 0.653325 | 5669.139 | 3783.163 | 6167.659 | 4968.715 | 5052.579 | 4655.065 |
| 24171 | CCDC7     | 197.8166 | -0.0902  | 0.237601 | -0.37964 | 0.704214 | 0.774545 | 215.7504 | 206.9217 | 186.456  | 165.1774 | 258.8324 | 153.7619 |
| 21107 | AASDH     | 1545.612 | -0.09022 | 0.104412 | -0.86406 | 0.387558 | 0.488142 | 1579.64  | 1654.279 | 1546.611 | 1595.971 | 1411.813 | 1485.36  |
| 22702 | ZNF326    | 1052.255 | -0.09022 | 0.14833  | -0.60823 | 0.543033 | 0.635914 | 970.3346 | 1320.357 | 965.6751 | 968.7431 | 1033.19  | 1055.228 |
| 25591 | TTC6      | 23.54644 | -0.09027 | 0.589883 | -0.15303 | 0.878378 | 0.912508 | 22.76763 | 21.34906 | 27.82925 | 15.62489 | 40.6431  | 13.06473 |
| 21501 | GATAD2A   | 5461.11  | -0.09028 | 0.1124   | -0.80317 | 0.421879 | 0.521647 | 5227.339 | 6414.572 | 5255.555 | 5493.264 | 4885.729 | 5490.203 |
| 21863 | MVB12B    | 910.9445 | -0.09041 | 0.120466 | -0.75049 | 0.452959 | 0.550812 | 944.8565 | 936.0742 | 939.9331 | 933.0291 | 787.1927 | 924.5811 |
| 21866 | LRRC27    | 868.1664 | -0.09044 | 0.12054  | -0.75026 | 0.453101 | 0.550899 | 947.567  | 835.3504 | 902.3636 | 866.4447 | 831.118  |          |
| 22714 | ST3GAL4   | 640.1119 | -0.09046 | 0.149159 | -0.60649 | 0.544187 | 0.636929 | 717.7224 | 596.1315 | 672.0765 | 553.5675 | 594.6728 | 706.5006 |
| 26017 | LOC103234 | 8.718815 | -0.09051 | 1.081367 | -0.0837  | 0.933293 | 0.95367  | 4.336691 | 20.80165 | 1.391463 | 8.928508 | 12.83466 | 4.019918 |
| 21123 | KRTCAP2   | 3204.584 | -0.09054 | 0.105098 | -0.86144 | 0.388997 | 0.489584 | 3465.016 | 2964.782 | 3489.093 | 3122.746 | 2949.834 | 3236.034 |
| 20892 | TRAPPC10  | 3655.266 | -0.09075 | 0.101837 | -0.89113 | 0.372859 | 0.474423 | 3847.187 | 3894.835 | 3576.059 | 3303.548 | 3424.716 | 3885.251 |
| 20602 | LOC119627 | 26720.07 | -0.09079 | 0.096923 | -0.93675 | 0.348889 | 0.45021  | 28164.64 | 27645.39 | 26881.67 | 24769.91 | 24000.82 | 28857.99 |
| 21031 | LOC103233 | 3399.899 | -0.09083 | 0.103719 | -0.8757  | 0.381192 | 0.48186  | 3395.629 | 3836.809 | 3292.897 | 3153.995 | 3208.666 | 3511.398 |
| 22151 | SLC4A3    | 1100.6   | -0.0909  | 0.130031 | -0.6991  | 0.484491 | 0.581472 | 1196.927 | 1038.44  | 1177.177 | 1002.225 | 981.8518 | 1206.98  |
| 23252 | AURKAIP1  | 1497.15  | -0.09122 | 0.17481  | -0.52182 | 0.601796 | 0.688059 | 1792.68  | 1097.013 | 1745.59  | 1517.846 | 1294.162 | 1535.609 |
| 25550 | LOC103218 | 19.74307 | -0.09122 | 0.579513 | -0.15741 | 0.874924 | 0.910331 | 15.17842 | 26.27577 | 19.48048 | 22.32127 | 17.11289 | 18.08963 |
| 26083 | LOC119627 | 4.339999 | -0.09123 | 1.232945 | -0.07399 | 0.941016 | 0.959127 | 6.505036 | 5.474118 | 1.391463 | 2.232127 | 6.417332 | 4.019918 |
| 19670 | ATR       | 6121.254 | -0.09124 | 0.084889 | -1.07484 | 0.282446 | 0.381721 | 6534.309 | 6403.076 | 6006.945 | 5995.493 | 5814.103 | 5973.598 |
| 25460 | LOC119627 | 34.63143 | -0.09143 | 0.536194 | -0.17051 | 0.864609 | 0.902834 | 28.18849 | 29.56024 | 48.00546 | 33.4819  | 53.47777 | 15.07469 |
| 21164 | ARHGFE28  | 7207.814 | -0.09168 | 0.107087 | -0.85613 | 0.391928 | 0.492317 | 7036.823 | 8439.448 | 6836.952 | 6781.202 | 6830.18  | 7322.28  |
| 22144 | NKAPD1    | 2419.16  | -0.09178 | 0.130998 | -0.70061 | 0.483544 | 0.580494 | 2225.807 | 2987.774 | 2272.954 | 2290.162 | 2459.977 | 2278.288 |
| 22240 | PRDM10    | 660.3313 | -0.09205 | 0.134248 | -0.68565 | 0.492934 | 0.589238 | 674.8975 | 706.1612 | 662.3363 | 575.8888 | 716.6021 | 626.1022 |
| 25115 | LOC119627 | 55.96934 | -0.09207 | 0.403534 | -0.22817 | 0.819518 | 0.867484 | 68.30288 | 54.74118 | 48.00546 | 78.12444 | 53.47777 | 33.16432 |
| 21727 | STK39     | 1644.938 | -0.0922  | 0.119154 | -0.77381 | 0.439044 | 0.537211 | 1583.434 | 1936.743 | 1570.961 | 1622.756 | 1582.442 | 1572.793 |
| 20775 | TTL       | 2805.81  | -0.09225 | 0.101671 | -0.90734 | 0.364226 | 0.466086 | 2865.469 | 3056.748 | 2770.402 | 2535.696 | 2676.027 | 2930.52  |
| 25554 | LOC103218 | 24.385   | -0.09251 | 0.588356 | -0.15724 | 0.875058 | 0.910363 | 17.88885 | 41.05589 | 16.00182 | 22.32127 | 29.94755 | 19.09461 |
| 22159 | FCHO2     | 1029.808 | -0.09262 | 0.132601 | -0.6985  | 0.484866 | 0.581713 | 1030.506 | 1203.759 | 956.6306 | 1011.154 | 915.5394 | 1061.258 |
| 21965 | MED14     | 2330.488 | -0.09271 | 0.126404 | -0.73346 | 0.463279 | 0.560733 | 2187.319 | 2842.162 | 2188.075 | 2185.252 | 2237.51  | 2342.607 |
| 24250 | TNNC1     | 123.1497 | -0.09274 | 0.251759 | -0.36837 | 0.712601 | 0.781216 | 144.7371 | 119.3358 | 115.4914 | 136.1597 | 117.6511 | 105.5228 |
| 22685 | PPID      | 2240.699 | -0.09276 | 0.1521   | -0.60984 | 0.541966 | 0.635129 | 2056.676 | 2934.675 | 1944.569 | 2174.092 | 2258.901 | 2075.283 |
| 26272 | SPINK1    | 1.856256 | -0.09288 | 2.080271 | -0.04465 | 0.964387 | 0.97584  | 0        | 2.189647 | 3.478657 | 4.464254 | 0        | 1.004979 |
| 24974 | TMPRSS5   | 52.28714 | -0.09295 | 0.369955 | -0.25124 | 0.801629 | 0.853305 | 66.13454 | 42.69812 | 52.87558 | 53.57105 | 49.19955 | 49.24399 |
| 21524 | COG5      | 1484.46  | -0.09298 | 0.116127 | -0.80069 | 0.423312 | 0.522843 | 1453.876 | 1706.283 | 1438.077 | 1359.365 | 1473.847 | 1475.31  |
| 21400 | MTMR3     | 3069.846 | -0.0931  | 0.113969 | -0.81688 | 0.414    | 0.514308 | 3291.548 | 3124.079 | 3099.483 | 2899.533 | 2624.689 | 3379.746 |
| 24765 | LOC119627 | 75.25573 | -0.09322 | 0.323826 | -0.28788 | 0.773438 | 0.830279 | 66.13454 | 100.1764 | 66.79021 | 69.19594 | 74.86887 | 74.36848 |
| 22179 | MARF1     | 2977.843 | -0.09333 | 0.134333 | -0.6948  | 0.487183 | 0.583965 | 2784.698 | 3672.038 | 2769.707 | 2828.105 | 2641.802 | 3170.71  |
| 21046 | MME       | 1141.68  | -0.09346 | 0.107029 | -0.87321 | 0.382547 | 0.483227 | 1198.011 | 1178.03  | 1157.697 | 1165.17  | 1073.834 | 1077.338 |
| 20468 | SLC9A6    | 2295.869 | -0.09346 | 0.098251 | -0.95126 | 0.341475 | 0.443527 | 2359.16  | 2506.599 | 2246.517 | 2252.216 | 2128.415 | 2282.308 |
| 24828 | B3GNT4    | 58.19897 | -0.09391 | 0.33916  | -0.2769  | 0.78186  | 0.83719  | 56.37698 | 62.95236 | 61.92009 | 46.87467 | 57.75599 | 63.31371 |
| 19940 | WBP1      | 2839.838 | -0.09403 | 0.090355 | -1.04068 | 0.298024 | 0.397341 | 2855.169 | 3032.114 | 2913.027 | 2703.106 | 2699.558 | 2836.052 |
| 20781 | ZMYM1     | 1677.18  | -0.09404 | 0.103701 | -0.90679 | 0.364517 | 0.466319 | 1822.494 | 1684.386 | 1690.627 | 1517.846 | 1683.48  | 1664.246 |
| 21671 | NDUFA8    | 2347.964 | -0.09404 | 0.120447 | -0.78076 | 0.434943 | 0.533568 | 2667.065 | 2092.208 | 2518.548 | 2162.931 | 2213.98  | 2433.055 |
| 20862 | BTBD3     | 1253.434 | -0.09406 | 0.104918 | -0.89649 | 0.369994 | 0.47151  | 1277.155 | 1311.051 | 1298.235 | 1154.01  | 1212.876 | 1267.279 |
| 20974 | PIP4K2C   | 2213.533 | -0.0941  | 0.106627 | -0.8825  |          |          |          |          |          |          |          |          |



|       |           |          |          |          |          |          |          |          |          |          |          |          |          |
|-------|-----------|----------|----------|----------|----------|----------|----------|----------|----------|----------|----------|----------|----------|
| 20817 | HSPH1     | 7497.554 | -0.09455 | 0.10481  | -0.90209 | 0.367012 | 0.468704 | 7373.459 | 8641.99  | 7218.909 | 6993.254 | 6984.196 | 7773.516 |
| 25788 | LOC103232 | 12.10047 | -0.0947  | 0.783171 | -0.12092 | 0.903751 | 0.931682 | 13.55216 | 14.23271 | 9.044508 | 22.32127 | 6.417332 | 7.034856 |
| 24917 | LOC119624 | 54.79375 | -0.09473 | 0.362256 | -0.2615  | 0.793705 | 0.846838 | 51.49821 | 54.19377 | 62.61582 | 62.49956 | 57.75599 | 40.19918 |
| 24567 | LPXN      | 76.39688 | -0.09488 | 0.29556  | -0.32103 | 0.748191 | 0.809617 | 80.77087 | 73.90059 | 82.0963  | 66.96381 | 81.28621 | 73.3635  |
| 25992 | TRNAA-AG  | 5.1244   | -0.09494 | 1.08409  | -0.08758 | 0.930211 | 0.951434 | 4.878777 | 4.926706 | 6.261582 | 2.232127 | 6.417332 | 6.029877 |
| 21338 | RAB4A     | 1026.952 | -0.09503 | 0.115055 | -0.82594 | 0.408837 | 0.509346 | 990.9339 | 1140.259 | 1051.25  | 984.368  | 998.9647 | 995.9347 |
| 21580 | BCL7B     | 3932.861 | -0.09506 | 0.120036 | -0.79195 | 0.428388 | 0.527743 | 3547.955 | 4736.754 | 3900.966 | 3939.704 | 3741.305 | 3730.484 |
| 20423 | DMXL1     | 5458.695 | -0.09507 | 0.099221 | -0.95813 | 0.337997 | 0.439976 | 5463.146 | 6228.999 | 5224.943 | 5218.713 | 5189.482 | 5426.889 |
| 22442 | ANKRD17   | 8111.317 | -0.09513 | 0.146256 | -0.65046 | 0.515396 | 0.610607 | 7287.267 | 10698.07 | 7152.118 | 7622.714 | 7638.764 | 8268.971 |
| 24038 | UFSP1     | 239.912  | -0.09515 | 0.23719  | -0.40116 | 0.688302 | 0.761254 | 277.5482 | 196.5208 | 273.4224 | 220.9806 | 177.5462 | 293.454  |
| 25514 | LOC103220 | 20.49146 | -0.09528 | 0.586083 | -0.16257 | 0.870854 | 0.907376 | 15.7205  | 28.46541 | 18.78475 | 26.78552 | 17.11289 | 16.07967 |
| 25452 | LOC119624 | 23.43058 | -0.09531 | 0.556208 | -0.17135 | 0.863947 | 0.902406 | 21.14137 | 24.63353 | 27.82925 | 11.16063 | 25.66933 | 30.14938 |
| 20984 | MTF2      | 2088.653 | -0.09544 | 0.108311 | -0.88115 | 0.378235 | 0.479147 | 2149.915 | 2322.121 | 2001.619 | 1872.755 | 2143.389 | 2042.118 |
| 25208 | LOC103230 | 36.26757 | -0.09556 | 0.446894 | -0.21382 | 0.830685 | 0.876083 | 29.27266 | 48.71965 | 34.09084 | 42.41041 | 29.94755 | 33.16432 |
| 22211 | LOC119624 | 474.4963 | -0.09557 | 0.138384 | -0.69065 | 0.489786 | 0.586245 | 497.6353 | 485.5543 | 489.7949 | 455.3539 | 434.2395 | 484.4001 |
| 20852 | RASSF3    | 5326.619 | -0.09567 | 0.106525 | -0.89814 | 0.369111 | 0.470593 | 5301.605 | 6178.637 | 5032.225 | 5102.642 | 4932.789 | 5411.814 |
| 23280 | LOC103240 | 265.0349 | -0.09569 | 0.185177 | -0.51677 | 0.605314 | 0.691249 | 288.932  | 245.2405 | 288.0328 | 223.2127 | 284.5017 | 260.2897 |
| 23049 | TMEM177   | 858.0152 | -0.09581 | 0.172777 | -0.55454 | 0.579211 | 0.668069 | 997.981  | 655.2519 | 1006.723 | 883.9223 | 770.0798 | 834.133  |
| 20847 | ERBIN     | 8179.76  | -0.09582 | 0.106608 | -0.89883 | 0.368741 | 0.470235 | 8015.831 | 9572.043 | 7769.232 | 7778.963 | 7615.234 | 8327.26  |
| 20508 | GOLGA3    | 7000.835 | -0.09589 | 0.101505 | -0.94469 | 0.344818 | 0.446996 | 7465.071 | 7206.677 | 7038.019 | 6415.133 | 6297.542 | 7582.57  |
| 23930 | LOC119624 | 164.0123 | -0.09591 | 0.229206 | -0.41846 | 0.675612 | 0.75057  | 182.6831 | 159.2968 | 163.4969 | 160.7131 | 188.2417 | 129.6424 |
| 22661 | ENTPD5    | 409.7533 | -0.09602 | 0.156617 | -0.6131  | 0.539811 | 0.633279 | 426.0799 | 468.0371 | 374.9992 | 397.3186 | 402.1528 | 389.932  |
| 25759 | LOC119620 | 1822.064 | -0.09605 | 0.760552 | -0.12629 | 0.899505 | 0.928349 | 2875.226 | 468.5845 | 2304.958 | 1526.775 | 1202.18  | 2554.658 |
| 21184 | RPL15     | 37990.5  | -0.09654 | 0.113242 | -0.85249 | 0.393941 | 0.494309 | 42615.04 | 32817.34 | 42353.34 | 36691.7  | 35680.37 | 37785.22 |
| 22199 | HK1       | 1784.167 | -0.09658 | 0.139546 | -0.6921  | 0.488875 | 0.585465 | 1654.99  | 2236.725 | 1640.535 | 1776.773 | 1617.168 | 1778.814 |
| 20583 | CLPB      | 4139.914 | -0.09664 | 0.102765 | -0.94044 | 0.346992 | 0.448175 | 4406.62  | 4372.178 | 4064.463 | 3888.365 | 3689.966 | 4417.89  |
| 22310 | ZBTB21    | 1321.549 | -0.09672 | 0.143634 | -0.67336 | 0.500716 | 0.596636 | 1211.563 | 1657.016 | 1230.749 | 1229.902 | 1251.38  | 1348.682 |
| 23950 | LOC103230 | 178.3117 | -0.09673 | 0.232902 | -0.41533 | 0.677903 | 0.752487 | 195.1511 | 210.2061 | 148.8865 | 142.8561 | 181.8244 | 190.9461 |
| 23426 | LOC119624 | 218.5582 | -0.0968  | 0.195338 | -0.49554 | 0.620221 | 0.703858 | 239.6022 | 212.9432 | 223.3298 | 198.6593 | 243.8586 | 192.9561 |
| 20464 | TFB2M     | 1608.773 | -0.09688 | 0.1018   | -0.95168 | 0.341259 | 0.443333 | 1682.094 | 1619.792 | 1690.627 | 1459.811 | 1572.246 | 1628.067 |
| 20308 | USP22     | 12786.38 | -0.09691 | 0.099163 | -0.97729 | 0.328425 | 0.429938 | 13731.05 | 12809.44 | 13115.93 | 11968.66 | 11350.12 | 13743.09 |
| 21334 | ASH1L     | 5045.566 | -0.09696 | 0.117251 | -0.82693 | 0.408278 | 0.508769 | 4749.219 | 6118.969 | 4777.587 | 4799.073 | 4857.92  | 4970.628 |
| 20033 | CTNNAL1   | 8579.135 | -0.09703 | 0.094897 | -1.02245 | 0.306569 | 0.406835 | 8547.076 | 9724.771 | 8327.209 | 8363.78  | 8475.156 | 8036.821 |
| 21438 | CDC127    | 966.0434 | -0.09719 | 0.119529 | -0.81307 | 0.416179 | 0.516099 | 1031.048 | 1030.776 | 937.8459 | 870.5295 | 924.0958 | 1001.965 |
| 20975 | BCKDK     | 3204.273 | -0.09719 | 0.110147 | -0.8824  | 0.377561 | 0.478544 | 3053.573 | 3667.659 | 3218.453 | 3180.781 | 2845.017 | 3260.153 |
| 24558 | LOC119624 | 123.2026 | -0.0973  | 0.301916 | -0.32227 | 0.747246 | 0.808872 | 157.7471 | 82.65918 | 142.6249 | 124.9991 | 100.5382 | 130.6473 |
| 23859 | ZNF793    | 134.7387 | -0.09747 | 0.227194 | -0.42901 | 0.667917 | 0.74423  | 139.8583 | 146.7064 | 131.4932 | 127.2312 | 130.4858 | 132.6573 |
| 20777 | VPS9D1    | 2140.437 | -0.09763 | 0.10761  | -0.90729 | 0.364253 | 0.46609  | 2329.345 | 2020.497 | 2293.131 | 1937.486 | 2081.355 | 2180.805 |
| 23104 | SAP130    | 1180.163 | -0.0978  | 0.180026 | -0.54328 | 0.586937 | 0.675369 | 1020.207 | 1637.309 | 1001.853 | 1189.724 | 1112.338 | 1119.547 |
| 21881 | FAM149B1  | 642.2613 | -0.09793 | 0.131034 | -0.74735 | 0.454853 | 0.552638 | 669.4767 | 671.6743 | 647.0302 | 683.0309 | 607.5074 | 574.8483 |
| 20757 | KANSL3    | 3100.049 | -0.09793 | 0.107575 | -0.91037 | 0.362625 | 0.46444  | 3438.454 | 3041.42  | 3143.314 | 2828.105 | 2838.6   | 3310.402 |
| 21980 | PSMB9     | 665.0812 | -0.09806 | 0.134148 | -0.73097 | 0.464798 | 0.562177 | 707.4227 | 614.1961 | 740.9539 | 651.7811 | 646.0114 | 630.1221 |
| 21163 | PFDN6     | 1123.484 | -0.09808 | 0.114547 | -0.85626 | 0.391852 | 0.492245 | 1131.334 | 1261.237 | 1093.69  | 1078.117 | 1060.999 | 1115.527 |
| 19286 | SF3B3     | 12409.91 | -0.09815 | 0.086215 | -1.13846 | 0.254927 | 0.351407 | 13117.95 | 13011.43 | 12372.89 | 11740.99 | 11472.05 | 12744.14 |
| 22692 | FKBPL     | 336.1024 | -0.09822 | 0.161141 | -0.60952 | 0.542182 | 0.63522  | 342.0565 | 335.5634 | 368.0419 | 308.0335 | 310.171  | 352.7478 |
| 21566 | FUNDC1    | 683.9696 | -0.09824 | 0.123651 | -0.79446 | 0.426927 | 0.526284 | 707.9648 | 697.4027 | 713.8204 | 705.3521 | 648.1505 | 631.1271 |
| 22337 | CCDC174   | 1291.359 | -0.09828 | 0.146934 | -0.66889 | 0.503568 | 0.599335 | 1177.412 | 1642.783 | 1184.831 | 1252.223 | 1257.797 | 1233.11  |
| 21801 | PUS10     | 671.248  | -0.0983  | 0.129393 | -0.75969 | 0.447441 | 0.545627 | 723.1432 | 711.6354 | 649.8131 | 602.6743 | 658.8461 | 681.3761 |
| 25494 | HTR2A     | 19.40021 | -0.09832 | 0.595044 | -0.16523 | 0.868766 | 0.905944 | 19.51511 | 27.37059 | 13.2189  | 20.08914 | 17.11289 | 19.09461 |
| 21082 | PAGR1     | 1092.443 | -0.09833 | 0.113316 | -0.86773 | 0.385542 | 0.486179 | 1083.089 | 1205.401 | 1097.168 | 1087.046 | 1075.973 | 1005.984 |
| 25473 | PYDC2     | 19.00181 | -0.09834 | 0.581404 | -0.16914 | 0.86569  | 0.903481 | 24.39389 | 16.42235 | 18.08902 | 15.62489 | 21.39111 | 18.08963 |
| 26057 | LOC119625 | 5.767986 | -0.09849 | 1.287398 | -0.0765  | 0.939022 | 0.958049 | 5.96295  | 6.568942 | 4.87012  | 2.232127 | 14.97377 | 0        |
| 20772 | RNF216    | 8408.066 | -0.09851 | 0.108542 | -0.90755 | 0.364115 | 0.466034 | 8130.211 | 9911.986 | 8046.133 | 8006.639 | 7779.945 | 8573.48  |
| 21704 | ZSCAN26   | 718.528  | -0.09857 | 0.126847 | -0.77704 | 0.437132 | 0.535439 | 694.9547 | 784.9885 | 749.9984 | 725.4413 | 650.2896 | 705.4956 |
| 21435 | CLINT1    | 7749.301 | -0.09864 | 0.121258 | -0.81345 | 0.415958 | 0.515897 | 7387.553 | 9485.552 | 7171.599 | 7457.536 | 7095.43  | 7898.134 |
| 23530 | LOC119618 | 209.2173 | -0.09867 | 0.206168 | -0.47859 | 0.632232 | 0.714317 | 234.1813 | 233.1974 | 180.8902 | 189.7308 | 220.3284 | 196.976  |
| 25143 | LOC119624 | 35.85834 | -0.09867 | 0.441325 | -0.22358 | 0.823083 | 0.870288 | 43.909   | 36.67659 | 31.30791 | 24.5534  | 38.50399 | 40.19918 |
| 21340 | RNF2      | 1383.868 | -0.0987  | 0.119519 | -0.82583 | 0.408898 | 0.509398 | 1329.196 | 1591.874 | 1368.504 | 1354.901 | 1407.535 | 1251.199 |
| 20802 | LOC103240 | 1288.904 | -0.09876 | 0.109239 | -0.90412 | 0.365933 | 0.467641 | 1350.879 | 1336.78  | 1316.324 | 1238.83  | 1152.981 | 1337.628 |
| 19704 | ERGIC2    | 2683.12  | -0.0988  | 0.092406 | -1.06924 | 0.28496  | 0.384479 | 2692.001 | 2872.817 | 2757.183 | 2564.714 | 2699.558 | 2512.449 |
| 22802 | COX6A1    | 7875.161 | -0.09888 | 0.167105 | -0.59173 | 0.554031 | 0.645837 | 8952.014 | 5600.023 | 9882.864 | 7888.337 | 7469.774 | 7457.953 |
| 25441 | LOC119624 | 24.73278 | -0.09892 | 0.568363 | -0.17404 | 0.861833 | 0.900587 | 33.06727 | 18.06459 | 25.04633 | 15.62489 | 38.50399 | 18.08963 |
| 24939 | LOC103220 | 56.54549 | -0.09906 | 0.385903 | -0.2567  | 0.797409 | 0.850038 | 66.13454 | 46.53    | 61.22436 | 78.12444 | 47.06043 | 40.19918 |
| 23592 | CCDC112   | 522.32   | -0.09909 | 0.210953 | -0.46975 | 0.638535 | 0.719543 | 446.1371 | 747.2171 | 426.4833 | 520.0856 | 500.5519 | 493.4449 |
| 26225 | SMIM43    | 1.855369 | -0.09912 | 1.900734 | -0.05215 | 0.958412 | 0.971569 | 0.542086 | 1.642235 | 3.478657 | 4.464254 | 0        | 1.004979 |
| 21764 | CUNH1orf1 | 807.7082 | -0.09912 | 0.129426 | -0.76582 | 0.443785 | 0.542089 | 866.254  | 741.1956 | 898.1892 | 801.3336 | 776.4972 | 762.7794 |
| 22103 | ENTPD6    | 1287.709 | -0.09924 | 0.140123 | -0.70826 | 0.478784 | 0.575871 | 1480.438 | 1161.06  | 1360.851 | 1109.367 | 1191.485 | 1423.051 |
| 22162 | HSPA2     | 663.346  | -0.09931 | 0.142273 | -0.698   | 0.485179 | 0.582009 | 663.5137 | 755.9757 | 642.1601 | 656.2453 | 564.7252 | 697.4558 |
| 22102 | TRAPPC1   | 1785.273 | -0.09946 | 0.140325 | -0.70882 | 0.478436 | 0.575478 | 1638.727 | 2252.6   | 1648.883 | 1649.542 | 1788.297 | 1733.59  |
| 20915 | DCTN3     | 2278.234 | -0.0995  | 0.111853 | -0.88954 | 0.373711 | 0.475023 | 2432.884 | 2104.798 | 2536.637 | 2216.502 | 2062.103 | 2316.478 |
| 21970 | LOC103220 | 811.0031 | -0.0995  |          |          |          |          |          |          |          |          |          |          |



|       |           |          |          |          |          |          |          |          |          |          |          |          |          |
|-------|-----------|----------|----------|----------|----------|----------|----------|----------|----------|----------|----------|----------|----------|
| 25677 | LOC103233 | 14.9708  | -0.09988 | 0.718738 | -0.13897 | 0.889472 | 0.920926 | 11.9259  | 25.72836 | 9.044508 | 8.928508 | 17.11289 | 17.08465 |
| 21303 | LOC119625 | 735.843  | -0.09995 | 0.119979 | -0.83305 | 0.404815 | 0.505187 | 792.5303 | 747.2171 | 744.4326 | 727.6734 | 686.6545 | 716.5504 |
| 20824 | ADAR      | 10179.7  | -0.1     | 0.110986 | -0.90103 | 0.36757  | 0.469259 | 10434.08 | 11445.29 | 9725.629 | 9479.843 | 8926.509 | 11066.83 |
| 21283 | PELP1     | 2000.864 | -0.10011 | 0.119494 | -0.83775 | 0.402171 | 0.502359 | 2209.002 | 1990.937 | 2019.012 | 1810.255 | 1769.045 | 2206.935 |
| 19941 | SZRD1     | 5796.258 | -0.10012 | 0.09626  | -1.04008 | 0.298301 | 0.397689 | 5987.886 | 5837.052 | 6175.312 | 5511.122 | 5165.952 | 6100.225 |
| 22825 | POM121C   | 865.2907 | -0.10019 | 0.170014 | -0.5893  | 0.55566  | 0.647205 | 742.6583 | 1135.332 | 807.7441 | 772.3159 | 900.5656 | 833.128  |
| 26132 | LOC119626 | 2.548558 | -0.10023 | 1.514495 | -0.06618 | 0.947236 | 0.963657 | 2.710432 | 2.189647 | 2.782925 | 4.464254 | 2.139111 | 1.004979 |
| 20436 | PDHA1     | 3519.617 | -0.10024 | 0.104834 | -0.95618 | 0.338981 | 0.440977 | 3585.359 | 3992.822 | 3351.338 | 3234.352 | 3351.986 | 3601.846 |
| 26078 | LOC119627 | 4.719454 | -0.1003  | 1.347071 | -0.07446 | 0.940645 | 0.958932 | 6.505036 | 7.663765 | 0.695731 | 0        | 6.417332 | 7.034856 |
| 19537 | PLXNA3    | 4460.167 | -0.10035 | 0.091708 | -1.09426 | 0.273839 | 0.372633 | 4610.445 | 4504.652 | 4737.235 | 4276.755 | 4047.197 | 4584.716 |
| 23584 | ZNF850    | 196.9929 | -0.10036 | 0.212919 | -0.47137 | 0.637373 | 0.718477 | 183.7673 | 233.7448 | 195.5005 | 160.7131 | 203.2155 | 205.0158 |
| 22285 | PRDM15    | 794.5133 | -0.10038 | 0.148398 | -0.67646 | 0.49875  | 0.595004 | 752.4159 | 962.35   | 754.1728 | 781.2444 | 688.7936 | 828.1031 |
| 25438 | LOC119628 | 501.0484 | -0.10043 | 0.57429  | -0.17488 | 0.861178 | 0.900008 | 256.9489 | 934.432  | 363.8675 | 412.9435 | 581.8381 | 456.2607 |
| 20863 | PSMD13    | 5519.336 | -0.1006  | 0.11223  | -0.89634 | 0.370072 | 0.47157  | 6192.795 | 4917.948 | 6028.512 | 5238.802 | 5106.057 | 5631.905 |
| 26015 | IL21R     | 4.015842 | -0.1008  | 1.198718 | -0.08409 | 0.932983 | 0.953425 | 4.878777 | 3.284471 | 4.174388 | 4.464254 | 4.278221 | 3.014938 |
| 22357 | RAD51B    | 483.0044 | -0.10082 | 0.151328 | -0.66623 | 0.505265 | 0.600827 | 561.6015 | 478.4379 | 460.5742 | 479.9073 | 432.1004 | 485.4051 |
| 21746 | SDHD      | 2248.145 | -0.10087 | 0.130942 | -0.77035 | 0.44109  | 0.539242 | 2602.015 | 1906.635 | 2474.021 | 2080.342 | 2162.641 | 2263.214 |
| 25858 | LOC119629 | 8.856755 | -0.10103 | 0.915151 | -0.11039 | 0.912098 | 0.937741 | 3.252518 | 11.49565 | 13.2189  | 6.696381 | 6.417332 | 12.05975 |
| 25812 | LOC119624 | 11.95483 | -0.10105 | 0.852698 | -0.11851 | 0.905663 | 0.932749 | 16.26259 | 10.94824 | 9.044508 | 8.928508 | 23.53022 | 3.014938 |
| 24163 | CD163     | 121.3213 | -0.10114 | 0.265677 | -0.38067 | 0.703444 | 0.773955 | 105.1648 | 157.1072 | 114.7957 | 111.6063 | 117.6511 | 121.6025 |
| 21622 | NCLN      | 2842.414 | -0.10116 | 0.128613 | -0.78657 | 0.431531 | 0.530582 | 3094.771 | 2580.499 | 3158.62  | 2642.838 | 2432.169 | 3145.586 |
| 21284 | FGGY      | 735.5757 | -0.10121 | 0.120849 | -0.83747 | 0.402326 | 0.502517 | 787.6515 | 738.4585 | 758.3472 | 676.3345 | 740.1323 | 712.5304 |
| 25585 | LOC103235 | 14.62748 | -0.10124 | 0.659075 | -0.15361 | 0.877921 | 0.912235 | 11.38381 | 16.42235 | 17.39328 | 13.39276 | 17.11289 | 12.05975 |
| 21068 | RBAK      | 3422.907 | -0.10126 | 0.116315 | -0.87057 | 0.38399  | 0.484579 | 3351.178 | 4083.692 | 3195.494 | 3145.067 | 3354.126 | 3407.885 |
| 21111 | KLHL20    | 1138.702 | -0.10126 | 0.117265 | -0.86356 | 0.38783  | 0.488393 | 1127.54  | 1296.819 | 1110.387 | 1138.385 | 1071.694 | 1087.388 |
| 24651 | FGF18     | 94.52277 | -0.10142 | 0.330319 | -0.30703 | 0.758824 | 0.81834  | 113.2961 | 85.39624 | 91.83654 | 102.6778 | 117.6511 | 56.27885 |
| 22821 | TMC6      | 843.727  | -0.10151 | 0.172207 | -0.58946 | 0.55555  | 0.647123 | 984.4288 | 659.0838 | 980.2855 | 781.2444 | 750.8278 | 906.4915 |
| 23349 | BTNL8     | 205.075  | -0.10156 | 0.200617 | -0.50626 | 0.612673 | 0.697586 | 230.3867 | 202.5424 | 204.545  | 169.6417 | 220.3284 | 203.0059 |
| 21370 | STAU1     | 5152.86  | -0.10157 | 0.123666 | -0.82133 | 0.41146  | 0.51187  | 4962.259 | 6346.693 | 4694.795 | 4694.625 | 4791.608 | 5157.555 |
| 24656 | LOC103235 | 101.6511 | -0.10165 | 0.33132  | -0.30681 | 0.75899  | 0.81839  | 137.1479 | 65.68942 | 114.0999 | 95.98146 | 83.42532 | 113.5627 |
| 21661 | CBX8      | 603.4804 | -0.10177 | 0.130048 | -0.78254 | 0.433899 | 0.532533 | 628.8202 | 601.6056 | 644.943  | 609.3707 | 541.195  | 594.9478 |
| 21674 | SLC35C2   | 2188.077 | -0.10187 | 0.130524 | -0.78048 | 0.435106 | 0.53367  | 2518.533 | 1909.372 | 2373.14  | 2037.932 | 1967.982 | 2321.503 |
| 20082 | ACER3     | 1502.813 | -0.10195 | 0.100415 | -1.0153  | 0.309964 | 0.410317 | 1532.478 | 1621.434 | 1515.303 | 1435.258 | 1431.065 | 1481.34  |
| 20435 | SDHHC7    | 3250.271 | -0.10198 | 0.10663  | -0.95637 | 0.338884 | 0.440872 | 3363.104 | 3558.177 | 3181.58  | 2988.818 | 2932.721 | 3477.229 |
| 21672 | SEMA4C    | 847.7795 | -0.10202 | 0.130717 | -0.78049 | 0.4351   | 0.53367  | 935.6411 | 807.4324 | 895.4063 | 776.7802 | 767.9407 | 903.4765 |
| 24719 | LOC103214 | 64.03914 | -0.10221 | 0.345558 | -0.2958  | 0.767386 | 0.825324 | 67.7608  | 53.64636 | 76.53045 | 58.0353  | 77.00798 | 51.25395 |
| 23030 | SNX17     | 3463.764 | -0.10225 | 0.183599 | -0.55695 | 0.577564 | 0.666719 | 4399.031 | 2472.659 | 3891.921 | 3285.691 | 2845.017 | 3888.266 |
| 19685 | RBM12     | 8439.409 | -0.10236 | 0.09547  | -1.07221 | 0.283628 | 0.383045 | 8632.725 | 9473.509 | 8113.619 | 8015.568 | 7852.675 | 8548.355 |
| 25644 | LOC103225 | 13.59923 | -0.10239 | 0.715056 | -0.14319 | 0.88614  | 0.918657 | 16.26259 | 11.49565 | 13.91463 | 22.32127 | 8.556443 | 9.044815 |
| 22081 | ZNF462    | 2930.652 | -0.10248 | 0.143862 | -0.71232 | 0.476268 | 0.573366 | 2583.584 | 3801.775 | 2718.918 | 2821.409 | 2782.983 | 2785.246 |
| 25687 | LOC119627 | 11.65281 | -0.10249 | 0.749543 | -0.13674 | 0.891235 | 0.922392 | 10.84173 | 14.78012 | 10.43597 | 6.696381 | 17.11289 | 10.04979 |
| 25197 | LOC119625 | 30.81431 | -0.1025  | 0.476422 | -0.21514 | 0.829659 | 0.875361 | 32.52518 | 38.86624 | 25.04633 | 22.32127 | 29.94755 | 36.17926 |
| 18309 | MORF4L2   | 13913.13 | -0.10253 | 0.080044 | -1.28089 | 0.200232 | 0.290741 | 14398.36 | 14940.51 | 13884.02 | 13156.16 | 13540.57 | 13559.18 |
| 20199 | PAPSS1    | 3042.774 | -0.10256 | 0.102896 | -0.9967  | 0.318908 | 0.419717 | 3193.431 | 3345.234 | 2918.593 | 2741.052 | 2934.86  | 3123.476 |
| 20818 | PIGU      | 1182.606 | -0.10257 | 0.113734 | -0.90187 | 0.367126 | 0.468827 | 1149.765 | 1329.116 | 1193.179 | 1176.331 | 1133.729 | 1113.517 |
| 21429 | RSBN1     | 1596.845 | -0.10283 | 0.126334 | -0.81396 | 0.415668 | 0.51567  | 1587.771 | 1917.036 | 1455.47  | 1526.775 | 1559.412 | 1534.604 |
| 24569 | LOC103234 | 101.9827 | -0.10291 | 0.320731 | -0.32086 | 0.748316 | 0.809719 | 90.52842 | 147.8012 | 77.22618 | 109.3742 | 100.5382 | 86.42823 |
| 19408 | ATXN10    | 2807.161 | -0.10299 | 0.092212 | -1.1169  | 0.264037 | 0.361654 | 2975.512 | 2758.408 | 2990.253 | 2712.034 | 2646.08  | 2760.679 |
| 25370 | GSF1      | 20.8294  | -0.103   | 0.551545 | -0.18675 | 0.851857 | 0.892654 | 20.0572  | 21.34906 | 22.95914 | 17.85702 | 25.66933 | 17.08465 |
| 21680 | LOC103217 | 2010.444 | -0.10309 | 0.132177 | -0.77994 | 0.435424 | 0.533937 | 2320.672 | 1717.231 | 2211.73  | 1948.647 | 1818.244 | 2046.138 |
| 23109 | HEYL      | 368.6517 | -0.10315 | 0.190141 | -0.5425  | 0.587475 | 0.675842 | 322.5414 | 451.6147 | 373.6077 | 374.9973 | 295.1973 | 393.952  |
| 19824 | PRDX2     | 2181.117 | -0.10322 | 0.098255 | -1.05058 | 0.293454 | 0.393536 | 2279.473 | 2137.096 | 2364.791 | 2073.646 | 2042.851 | 2188.845 |
| 25842 | LOC119628 | 7.326412 | -0.10335 | 0.916216 | -0.11281 | 0.910184 | 0.936354 | 10.29964 | 6.02153  | 6.261582 | 8.928508 | 6.417332 | 6.029877 |
| 22352 | HOXD9     | 362.6601 | -0.10341 | 0.155124 | -0.66664 | 0.505002 | 0.600639 | 356.1507 | 393.0417 | 375.6949 | 372.7652 | 348.675  | 329.6333 |
| 20882 | GPRASP2   | 1293.907 | -0.1035  | 0.115975 | -0.89239 | 0.372182 | 0.473827 | 1399.125 | 1355.939 | 1271.797 | 1185.259 | 1176.511 | 1374.812 |
| 23947 | CDADC1    | 124.0157 | -0.10363 | 0.249207 | -0.41584 | 0.67753  | 0.752135 | 124.1378 | 123.7151 | 137.7548 | 140.624  | 96.25998 | 121.6025 |
| 22546 | FLVCR1    | 486.5311 | -0.10376 | 0.164001 | -0.63266 | 0.526957 | 0.621358 | 550.2177 | 447.7829 | 518.3199 | 395.0865 | 479.1608 | 528.6192 |
| 20471 | MADD      | 2227.158 | -0.10381 | 0.109189 | -0.95071 | 0.34175  | 0.443784 | 2359.702 | 2292.013 | 2276.433 | 2176.324 | 1903.808 | 2354.667 |
| 21701 | STIMATE   | 687.6598 | -0.10385 | 0.133577 | -0.77744 | 0.436901 | 0.535229 | 751.8738 | 668.3898 | 720.7777 | 667.406  | 598.951  | 718.5603 |
| 22852 | LOC103236 | 293.0082 | -0.10397 | 0.177681 | -0.58513 | 0.558458 | 0.649682 | 319.2889 | 308.7403 | 278.9883 | 294.6408 | 310.171  | 246.22   |
| 20090 | RTN3      | 8606.703 | -0.10414 | 0.102692 | -1.01406 | 0.310553 | 0.410943 | 8479.315 | 10020.92 | 8253.461 | 8278.959 | 8010.969 | 8596.594 |
| 25103 | LOC103235 | 31.47049 | -0.10436 | 0.45409  | -0.22981 | 0.818238 | 0.866544 | 30.35684 | 33.93953 | 32.69937 | 33.4819  | 34.22577 | 24.11951 |
| 22030 | ZFP14     | 405.9738 | -0.10439 | 0.144834 | -0.72072 | 0.471079 | 0.568481 | 421.2011 | 406.727  | 434.1364 | 381.6937 | 402.1528 | 389.932  |
| 21721 | ZNF800    | 1270.844 | -0.10443 | 0.134746 | -0.77502 | 0.438328 | 0.536484 | 1175.243 | 1538.227 | 1236.315 | 1154.01  | 1311.275 | 1209.995 |
| 24115 | LOC119627 | 135.5051 | -0.10464 | 0.269406 | -0.3884  | 0.697723 | 0.769188 | 158.2892 | 113.8617 | 150.278  | 93.74933 | 156.1551 | 140.6971 |
| 24814 | CSPG5     | 48.29014 | -0.10466 | 0.376216 | -0.2782  | 0.780856 | 0.836586 | 49.32986 | 48.71965 | 50.78839 | 49.10679 | 55.61688 | 36.17926 |
| 22682 | LOC119615 | 308.4657 | -0.10467 | 0.171444 | -0.61054 | 0.541503 | 0.634821 | 345.309  | 330.6367 | 283.1627 | 279.0159 | 310.171  | 302.4988 |
| 22876 | HOXC9     | 338.7125 | -0.10475 | 0.179856 | -0.58243 | 0.560278 | 0.651097 | 315.4943 | 419.3174 | 317.9492 | 319.1942 | 333.7013 | 326.6183 |
| 19823 | DPP9      | 3431.113 | -0.10479 | 0.099743 | -1.05064 | 0.293422 | 0.393514 | 3546.871 | 3521.5   | 3605.976 | 3305.78  | 3009.729 | 3596.822 |
| 19118 | NFYA      | 3578.549 | -0.10481 | 0.089941 | -1.16529 | 0.243902 | 0.339151 | 3711.665 | 3862.538 | 3553.1   | 3479.886 | 3330     |          |



|       |           |          |          |          |          |            |          |          |          |          |          |          |          |
|-------|-----------|----------|----------|----------|----------|------------|----------|----------|----------|----------|----------|----------|----------|
| 25581 | SLC49A3   | 13.95013 | -0.10534 | 0.682129 | -0.15442 | 0.877275   | 0.911735 | 14.63633 | 9.853413 | 18.78475 | 13.39276 | 14.97377 | 12.05975 |
| 19993 | RBBP9     | 1833.029 | -0.10543 | 0.102262 | -1.03097 | 0.302556   | 0.402314 | 1827.373 | 2040.751 | 1829.774 | 1812.487 | 1756.21  | 1731.58  |
| 24122 | GSTO2     | 95.70647 | -0.10544 | 0.272438 | -0.38702 | 0.698742   | 0.770067 | 100.286  | 93.06001 | 104.3597 | 78.12444 | 106.9555 | 91.45313 |
| 22674 | MOSMO     | 265.6743 | -0.1055  | 0.172677 | -0.61096 | 0.541223   | 0.634578 | 264.5381 | 286.8438 | 273.4224 | 252.2303 | 273.8062 | 243.205  |
| 22275 | ZNF782    | 484.2261 | -0.10552 | 0.155678 | -0.67782 | 0.497886   | 0.594223 | 460.2313 | 577.5195 | 466.14   | 491.0679 | 464.187  | 446.2109 |
| 20249 | UBR5      | 11794.97 | -0.10555 | 0.106857 | -0.98777 | 0.323264   | 0.424415 | 11683.05 | 13898.24 | 11100.39 | 10948.58 | 11217.5  | 11922.07 |
| 22725 | GOLGA4    | 11846.87 | -0.10557 | 0.174598 | -0.60462 | 0.545429   | 0.638074 | 9963.005 | 17031.62 | 9845.295 | 11448.58 | 11281.67 | 11511.03 |
| 21364 | OSTC      | 2823.069 | -0.10572 | 0.128676 | -0.82161 | 0.411297   | 0.511715 | 3182.047 | 2377.957 | 3219.149 | 2758.909 | 2723.088 | 2677.265 |
| 19829 | POLR1B    | 4349.207 | -0.10578 | 0.100771 | -1.04966 | 0.293876   | 0.394003 | 4690.673 | 4433.488 | 4410.241 | 3939.704 | 3985.163 | 4635.97  |
| 25794 | LOC103242 | 10.90512 | -0.1058  | 0.877179 | -0.12061 | 0.904      | 0.931722 | 12.46799 | 11.49565 | 9.044508 | 11.16063 | 19.252   | 2.009959 |
| 22038 | NFIL3     | 1560.061 | -0.10585 | 0.147268 | -0.71877 | 0.472283   | 0.569727 | 1393.162 | 2006.812 | 1451.991 | 1486.597 | 1495.238 | 1526.564 |
| 21211 | KANSL2    | 3097.221 | -0.10595 | 0.124878 | -0.84844 | 0.396193   | 0.496573 | 3592.948 | 2695.456 | 3347.164 | 3037.925 | 2772.287 | 3137.546 |
| 22976 | LOC103228 | 213.5183 | -0.10599 | 0.186485 | -0.56834 | 0.569804   | 0.659307 | 230.3867 | 211.301  | 222.634  | 209.8199 | 198.9373 | 208.0308 |
| 20716 | MAN2B1    | 1354.681 | -0.10604 | 0.115683 | -0.91663 | 0.359339   | 0.46112  | 1368.768 | 1462.684 | 1388.68  | 1254.455 | 1204.319 | 1449.18  |
| 19988 | COMT      | 1844.638 | -0.10607 | 0.102843 | -1.03134 | 0.302379   | 0.402179 | 1922.78  | 1954.26  | 1865.256 | 1779.005 | 1647.115 | 1899.411 |
| 25784 | LOC119625 | 8.778621 | -0.1061  | 0.873357 | -0.12148 | 0.903309   | 0.931371 | 14.09425 | 6.568942 | 6.261582 | 11.16063 | 8.556443 | 6.029877 |
| 24622 | ERICH5    | 60.02694 | -0.1061  | 0.339602 | -0.31242 | 0.754718   | 0.814891 | 66.67662 | 62.40495 | 56.35424 | 58.0353  | 68.45154 | 48.23901 |
| 25688 | CD79A     | 10.57915 | -0.1063  | 0.777601 | -0.1367  | 0.891269   | 0.922392 | 14.09425 | 9.306001 | 9.044508 | 11.16063 | 12.83466 | 7.034856 |
| 20103 | SHLD2     | 1690.856 | -0.1063  | 0.105036 | -1.01205 | 0.311516   | 0.41194  | 1685.347 | 1894.045 | 1677.408 | 1656.238 | 1649.254 | 1582.843 |
| 20835 | LOC103221 | 1128.487 | -0.10636 | 0.118242 | -0.89955 | 0.368362   | 0.470022 | 1187.711 | 1250.289 | 1074.209 | 1107.135 | 1013.938 | 1137.637 |
| 20619 | FH        | 3034.525 | -0.10648 | 0.114111 | -0.93316 | 0.350735   | 0.452218 | 3469.353 | 2850.373 | 3125.921 | 2783.462 | 2770.148 | 3207.894 |
| 22010 | LOC119624 | 426.302  | -0.10655 | 0.147196 | -0.72385 | 0.469158   | 0.566677 | 447.7633 | 431.3605 | 446.6595 | 448.6575 | 374.3444 | 409.0266 |
| 22197 | UBAP1     | 1786.487 | -0.10655 | 0.153885 | -0.6924  | 0.488683   | 0.585288 | 1543.32  | 2349.492 | 1664.189 | 1689.72  | 1747.653 | 1724.545 |
| 20280 | CIPC      | 1623.974 | -0.10658 | 0.108442 | -0.9828  | 0.325708   | 0.426988 | 1744.434 | 1682.197 | 1631.49  | 1506.686 | 1469.569 | 1709.47  |
| 24710 | LOC119618 | 64.05149 | -0.10659 | 0.358964 | -0.29694 | 0.76651    | 0.824673 | 61.79785 | 85.39624 | 51.48412 | 51.33892 | 77.00798 | 57.28383 |
| 22141 | CUNH12or  | 376.0268 | -0.10662 | 0.152071 | -0.70111 | 0.483232   | 0.580197 | 394.6389 | 405.6322 | 370.8248 | 366.0688 | 340.1186 | 378.8773 |
| 19982 | KPNA1     | 4677.406 | -0.10669 | 0.10331  | -1.03269 | 0.30175    | 0.401462 | 4742.714 | 5341.097 | 4470.77  | 4455.325 | 4288.917 | 4765.613 |
| 23884 | AVPR1B    | 111.0349 | -0.10669 | 0.250767 | -0.42544 | 0.670513   | 0.74634  | 123.5957 | 107.2927 | 115.4914 | 100.4457 | 104.8164 | 114.5677 |
| 21294 | CPNE2     | 1840.879 | -0.10686 | 0.128023 | -0.83466 | 0.403908   | 0.504269 | 1792.138 | 2209.901 | 1728.892 | 1647.31  | 1745.514 | 1921.521 |
| 25869 | LOC103243 | 8.176501 | -0.1072  | 0.989365 | -0.10835 | 0.913716   | 0.939006 | 10.29964 | 7.663765 | 7.653045 | 13.39276 | 0        | 10.04979 |
| 25429 | LOC119623 | 18.36214 | -0.10727 | 0.608511 | -0.17629 | 0.860067   | 0.899165 | 20.59928 | 16.96977 | 18.78475 | 26.78552 | 14.97377 | 12.05975 |
| 23295 | ZNF775    | 282.5595 | -0.10733 | 0.2085   | -0.51477 | 0.606711   | 0.692368 | 340.9723 | 227.7233 | 313.0791 | 258.9267 | 248.1368 | 306.5187 |
| 26288 | LOC119624 | 1.091709 | -0.10737 | 2.528902 | -0.04246 | 0.966135   | 0.977013 | 2.710432 | 0        | 0.695731 | 0        | 2.139111 | 1.004979 |
| 20440 | CEP104    | 1783.987 | -0.10746 | 0.112412 | -0.95594 | 0.339104   | 0.441051 | 1767.744 | 2028.161 | 1759.505 | 1698.649 | 1610.75  | 1839.112 |
| 24923 | LOC119624 | 49.10541 | -0.10759 | 0.413109 | -0.26043 | 0.794532   | 0.847516 | 53.12446 | 36.12918 | 62.61582 | 42.41041 | 64.17332 | 36.17926 |
| 25026 | ATP6V1E2  | 35.99449 | -0.10796 | 0.447947 | -0.241   | 0.809555   | 0.859986 | 39.03022 | 35.03436 | 38.96096 | 20.08914 | 40.6431  | 42.20914 |
| 20743 | PLD2      | 795.8348 | -0.10806 | 0.118596 | -0.91116 | 0.362209   | 0.464198 | 828.308  | 802.5057 | 849.488  | 743.2983 | 744.4105 | 806.9985 |
| 19981 | ARFIP2    | 2117.259 | -0.10813 | 0.104673 | -1.03298 | 0.301612   | 0.401299 | 2244.238 | 2165.561 | 2186.684 | 2015.611 | 1867.444 | 2224.02  |
| 20243 | ARHGAP35  | 10019.18 | -0.10819 | 0.109416 | -0.98882 | 0.322753   | 0.423869 | 9757.555 | 11480.87 | 9953.133 | 9339.219 | 8860.196 | 10724.14 |
| 22400 | ARPC4     | 4463.082 | -0.10822 | 0.164705 | -0.65703 | 0.51116    | 0.60666  | 5352.561 | 3251.626 | 5289.646 | 4205.327 | 4083.562 | 4595.771 |
| 20361 | DCTD      | 2474.356 | -0.10825 | 0.111856 | -0.96773 | 0.33318    | 0.435027 | 2688.206 | 2474.849 | 2544.985 | 2408.465 | 2100.607 | 2629.026 |
| 22082 | JAGN1     | 1004.881 | -0.1083  | 0.152034 | -0.71231 | 0.476271   | 0.573366 | 1136.755 | 822.76   | 1170.22  | 962.0467 | 930.5131 | 1006.989 |
| 19163 | DHX9      | 17444.73 | -0.10843 | 0.09358  | -1.15864 | 0.246604   | 0.342097 | 17973.42 | 19057.05 | 17277.1  | 16328.01 | 15799.47 | 18233.34 |
| 18975 | EIF4H     | 18809.24 | -0.10843 | 0.091161 | -1.18939 | 0.234286   | 0.328248 | 19981.85 | 19597.34 | 18976.07 | 17863.71 | 16794.16 | 19642.32 |
| 21548 | CNF45     | 638.5464 | -0.10843 | 0.13603  | -0.79708 | 0.425403   | 0.524843 | 683.5709 | 679.8855 | 628.9412 | 573.6566 | 581.8381 | 683.386  |
| 25600 | LOC119620 | 16.66132 | -0.10848 | 0.717849 | -0.15112 | 0.87988    | 0.913735 | 19.51511 | 9.853413 | 23.65487 | 13.39276 | 6.417332 | 27.13445 |
| 17988 | AZIN1     | 7265.049 | -0.10875 | 0.080844 | -1.34518 | 0.178567   | 0.26391  | 7722.562 | 7584.391 | 7309.354 | 7066.914 | 6877.241 | 7029.831 |
| 20219 | LIG4      | 1278.332 | -0.10877 | 0.109421 | -0.99401 | 0.320216   | 0.421037 | 1267.94  | 1427.65  | 1284.32  | 1196.42  | 1253.519 | 1240.145 |
| 18834 | CACUL1    | 6273.642 | -0.10879 | 0.089642 | -1.21357 | 0.224914   | 0.317475 | 6585.807 | 6671.308 | 6278.976 | 5993.261 | 5700.73  | 6411.769 |
| 19939 | FAR1      | 4359.236 | -0.10879 | 0.10453  | -1.04077 | 0.297984   | 0.397306 | 4452.155 | 4938.749 | 4184.824 | 3930.776 | 4145.596 | 4503.313 |
| 22478 | MICB      | 333.2711 | -0.10884 | 0.169543 | -0.64199 | 0.52088    | 0.616051 | 320.9151 | 391.3994 | 324.2108 | 341.5154 | 308.0319 | 313.5536 |
| 22433 | FAM222B   | 346.8668 | -0.10885 | 0.167038 | -0.65167 | 0.514612   | 0.609912 | 327.4202 | 406.727  | 346.4742 | 339.2833 | 316.5884 | 344.708  |
| 21768 | RBIS      | 1105.386 | -0.10917 | 0.142709 | -0.76499 | 0.444276   | 0.542564 | 1200.179 | 939.3587 | 1301.018 | 1120.528 | 1048.164 | 1023.069 |
| 21318 | CLK2      | 2282.332 | -0.10928 | 0.131596 | -0.8304  | 0.40631    | 0.506697 | 2099.501 | 2838.33  | 2169.986 | 2140.61  | 2156.224 | 2289.343 |
| 18983 | BICDL1    | 3772.483 | -0.1097  | 0.092374 | -1.1876  | 0.234992   | 0.329098 | 4010.355 | 3826.409 | 3917.663 | 3462.029 | 3540.228 | 3878.216 |
| 21851 | POL4      | 2829.252 | -0.10975 | 0.145841 | -0.75253 | 0.451735   | 0.549603 | 3274.744 | 2245.483 | 3288.722 | 2845.962 | 2733.783 | 2586.817 |
| 18911 | RAB3GAP2  | 4162.708 | -0.10999 | 0.091537 | -1.20158 | 0.229527   | 0.322658 | 4378.974 | 4522.169 | 4065.854 | 3921.847 | 3933.825 | 4153.58  |
| 21523 | LOC103221 | 893.7565 | -0.11004 | 0.13742  | -0.80077 | 0.423264   | 0.522812 | 956.2404 | 960.7077 | 871.7514 | 723.2091 | 889.87   | 960.7604 |
| 25669 | SYCP3     | 10.25766 | -0.11028 | 0.789144 | -0.13974 | 0.888865   | 0.920584 | 10.84173 | 8.758589 | 11.82743 | 13.39276 | 10.69555 | 6.029877 |
| 25681 | LOC103226 | 10.68532 | -0.11028 | 0.797459 | -0.1383  | 0.890007   | 0.921337 | 5.96295  | 15.32753 | 11.82743 | 13.39276 | 8.556443 | 9.044815 |
| 19550 | HADHA     | 4666.304 | -0.11042 | 0.101232 | -1.09072 | 0.275397   | 0.374498 | 4771.986 | 5219.024 | 4549.387 | 4357.112 | 4248.274 | 4852.041 |
| 20074 | TLN1      | 26947.15 | -0.11053 | 0.108724 | -1.01662 | 0.309335   | 0.409647 | 28366.3  | 28684.93 | 26895.58 | 24993.13 | 22997.58 | 29745.38 |
| 20318 | ALG8      | 1095.784 | -0.11055 | 0.113354 | -0.97528 | 0.329423   | 0.431032 | 1227.284 | 1111.246 | 1073.514 | 1069.189 | 1050.303 | 1043.169 |
| 20129 | SPG11     | 6040.416 | -0.11068 | 0.109803 | -1.00801 | 0.313449   | 0.413982 | 6043.179 | 7137.155 | 5638.207 | 5682.995 | 5655.809 | 6085.151 |
| 20725 | MAN1A2    | 6657.027 | -0.11071 | 0.121027 | -0.91471 | 0.360343   | 0.462229 | 6296.333 | 8230.337 | 6210.794 | 6377.187 | 6291.124 | 6536.386 |
| 20691 | BTBD7     | 5516.502 | -0.11079 | 0.119988 | -0.92334 | 0.355832   | 0.457172 | 5317.867 | 6652.696 | 5218.681 | 5140.588 | 4990.545 | 5778.632 |
| 24771 | LOC119628 | 1067.093 | -0.11102 | 0.387185 | -0.28674 | 0.774314   | 0.831034 | 1413.761 | 583.541  | 1327.455 | 1026.778 | 979.7127 | 1071.308 |
| 19232 | SEC61A1   | 12754.1  | -0.11111 | 0.096751 | -1.14843 | 0.250793   | 0.346679 | 13409.05 | 13301.01 | 13034.53 | 11897.24 | 11277.39 | 13605.41 |
| 23246 | LOC103233 | 203.9407 | -0.11115 | 0.212613 | -0.52278 | 0.601124   | 0.687503 | 220.0871 | 194.8786 | 222.634  | 151.7846 | 218.1893 | 216.0706 |
| 21736 | TTL5      | 1333.126 | -0.11122 | 0.144201 | -0.77127 | 0.440549   | 0.53878  | 1239.752 | 1681.102 | 1234.227 | 1281.241 | 1210.737 | 1351.697 |
| 24002 | KCNRG     | 96.24548 | -0.11128 | 0.273931 | -0.40623 | 0.684573</ |          |          |          |          |          |          |          |



|       |           |          |          |          |          |          |          |          |          |          |          |          |          |
|-------|-----------|----------|----------|----------|----------|----------|----------|----------|----------|----------|----------|----------|----------|
| 22055 | LOC119621 | 1008.577 | -0.11167 | 0.156069 | -0.71551 | 0.474294 | 0.571712 | 1207.226 | 867.6477 | 1072.122 | 977.6716 | 836.3923 | 1090.403 |
| 18024 | NDUFA10   | 4601.136 | -0.11182 | 0.083539 | -1.33853 | 0.180724 | 0.266564 | 4852.757 | 4847.879 | 4638.441 | 4352.648 | 4442.933 | 4472.159 |
| 20592 | KIAA1143  | 770.8594 | -0.11183 | 0.119118 | -0.9388  | 0.347835 | 0.449067 | 781.1465 | 795.3894 | 823.0502 | 749.9947 | 770.0798 | 705.4956 |
| 18090 | ETFA      | 6633.87  | -0.11183 | 0.084521 | -1.32314 | 0.185789 | 0.273035 | 6969.604 | 6623.136 | 7076.284 | 6591.471 | 6368.132 | 6174.594 |
| 21732 | LOC103224 | 1380.165 | -0.11203 | 0.145116 | -0.77202 | 0.440102 | 0.538357 | 1253.304 | 1759.382 | 1288.494 | 1325.883 | 1311.275 | 1342.653 |
| 18204 | PRICKLE4  | 4642.89  | -0.11205 | 0.086143 | -1.30075 | 0.193344 | 0.282358 | 4816.979 | 4621.251 | 5032.225 | 4488.807 | 4410.846 | 4487.233 |
| 24101 | LOC103216 | 93.81543 | -0.11208 | 0.287032 | -0.39047 | 0.696192 | 0.767946 | 90.52842 | 104.5557 | 98.09812 | 104.91   | 66.31243 | 98.48799 |
| 21116 | TMEM242   | 725.475  | -0.11211 | 0.13002  | -0.86223 | 0.38856  | 0.489196 | 749.7054 | 757.618  | 752.7813 | 629.4598 | 782.9145 | 680.3711 |
| 21860 | MED11     | 379.6698 | -0.11225 | 0.14952  | -0.75073 | 0.452813 | 0.550687 | 382.1709 | 405.0847 | 397.9583 | 352.6761 | 357.2315 | 382.8972 |
| 19797 | FAM210A   | 1343.105 | -0.1123  | 0.106552 | -1.05394 | 0.291911 | 0.392028 | 1443.576 | 1424.913 | 1320.498 | 1261.152 | 1257.797 | 1350.692 |
| 25720 | LOC103224 | 10.68422 | -0.11234 | 0.854244 | -0.13151 | 0.895371 | 0.925448 | 4.878777 | 20.80165 | 7.653045 | 11.16063 | 8.556443 | 11.05477 |
| 21561 | EBF3      | 1391.223 | -0.11239 | 0.141401 | -0.79482 | 0.42672  | 0.526127 | 1298.839 | 1735.843 | 1303.801 | 1334.812 | 1244.962 | 1429.081 |
| 20011 | SDHC      | 2871.188 | -0.11254 | 0.109568 | -1.02715 | 0.304352 | 0.404338 | 3263.902 | 2637.978 | 3050.086 | 2678.552 | 2744.479 | 2852.132 |
| 20500 | GNB1      | 9881.011 | -0.1128  | 0.119137 | -0.94684 | 0.34372  | 0.445747 | 9383.515 | 12060.58 | 9361.066 | 9174.042 | 9108.333 | 10198.53 |
| 18737 | LOC103225 | 10831.21 | -0.11286 | 0.092033 | -1.22629 | 0.220091 | 0.312276 | 11541.02 | 10572.16 | 11658.37 | 9912.876 | 10158.64 | 11144.22 |
| 20822 | CLN6      | 1725.949 | -0.11297 | 0.125347 | -0.90129 | 0.367434 | 0.46913  | 1929.827 | 1638.404 | 1818.642 | 1654.006 | 1454.595 | 1860.217 |
| 24035 | LOC119625 | 88.62393 | -0.11313 | 0.281919 | -0.40128 | 0.688214 | 0.761198 | 84.56547 | 93.60742 | 98.09812 | 73.66019 | 98.39909 | 83.4133  |
| 19805 | CDC40     | 1422.981 | -0.11329 | 0.107626 | -1.0526  | 0.292524 | 0.392665 | 1473.391 | 1583.115 | 1378.244 | 1392.847 | 1362.613 | 1347.677 |
| 19434 | ATXN7L3B  | 5776.148 | -0.1133  | 0.101893 | -1.11195 | 0.26616  | 0.364059 | 6439.444 | 5602.213 | 5974.245 | 5330.319 | 5253.656 | 6057.011 |
| 20050 | ZNF638    | 5482.134 | -0.11335 | 0.111069 | -1.02052 | 0.307483 | 0.407703 | 5347.14  | 6543.761 | 5200.592 | 5095.946 | 5448.315 | 5257.048 |
| 19324 | RNF141    | 3969.979 | -0.11335 | 0.100198 | -1.13127 | 0.25794  | 0.354861 | 4028.786 | 4540.781 | 3807.042 | 3874.972 | 3758.417 | 3809.877 |
| 19606 | UEVLD     | 1936.663 | -0.11338 | 0.104397 | -1.08603 | 0.277466 | 0.376234 | 2000.841 | 2169.393 | 1865.256 | 1908.469 | 1861.026 | 1814.993 |
| 20479 | CUNH3orf5 | 1520.535 | -0.11351 | 0.119465 | -0.95018 | 0.342022 | 0.443988 | 1543.32  | 1759.929 | 1433.207 | 1502.221 | 1518.769 | 1365.767 |
| 25634 | LOC103246 | 10.7516  | -0.11357 | 0.784943 | -0.14469 | 0.884957 | 0.917788 | 10.84173 | 7.116354 | 16.00182 | 8.928508 | 8.556443 | 13.06473 |
| 20069 | GNG4      | 1440.931 | -0.11364 | 0.111639 | -1.0179  | 0.308728 | 0.408965 | 1478.27  | 1606.106 | 1410.943 | 1419.633 | 1283.466 | 1447.17  |
| 19433 | MFN2      | 9725.126 | -0.11369 | 0.10222  | -1.1122  | 0.266052 | 0.363969 | 10583.15 | 9874.762 | 9875.907 | 8957.526 | 8588.529 | 10470.88 |
| 20589 | CLOCK     | 2433.869 | -0.11395 | 0.121363 | -0.93892 | 0.34777  | 0.449048 | 2284.894 | 2947.813 | 2358.529 | 2281.234 | 2318.796 | 2411.951 |
| 21759 | COBLL1    | 1677.172 | -0.11401 | 0.148639 | -0.76705 | 0.443051 | 0.541316 | 1516.216 | 2171.035 | 1543.132 | 1526.775 | 1672.785 | 1633.092 |
| 23873 | PHEX      | 97.05025 | -0.11402 | 0.26715  | -0.42682 | 0.669513 | 0.74557  | 101.9122 | 98.53413 | 100.881  | 93.74933 | 104.8164 | 82.40832 |
| 20114 | PSMG2     | 943.3018 | -0.11404 | 0.112837 | -1.01067 | 0.312175 | 0.412607 | 977.9238 | 1023.66  | 939.2374 | 930.797  | 887.7309 | 900.4616 |
| 21956 | HIGD2A    | 1163.977 | -0.11411 | 0.155264 | -0.73497 | 0.462355 | 0.559834 | 1369.852 | 933.3371 | 1328.847 | 1111.599 | 1067.416 | 1172.811 |
| 20062 | NDUF58    | 2922.936 | -0.11414 | 0.112014 | -1.01896 | 0.30822  | 0.408435 | 3107.781 | 2901.83  | 3113.398 | 2825.873 | 2464.255 | 3124.481 |
| 22148 | RFX7      | 1851.028 | -0.11423 | 0.163193 | -0.69999 | 0.483934 | 0.580883 | 1573.677 | 2509.336 | 1689.931 | 1745.523 | 1779.74  | 1807.958 |
| 20569 | ZBTB6     | 894.8644 | -0.11437 | 0.121293 | -0.94295 | 0.345707 | 0.447515 | 929.136  | 911.4407 | 955.9349 | 787.9408 | 847.0878 | 937.6458 |
| 21557 | CDAN1     | 954.7507 | -0.11444 | 0.143809 | -0.79581 | 0.426144 | 0.525514 | 1065.2   | 846.2987 | 1071.426 | 888.3865 | 832.114  | 1025.079 |
| 21194 | GIN1      | 540.1812 | -0.11445 | 0.134463 | -0.85118 | 0.39467  | 0.49506  | 573.5274 | 535.3688 | 573.2826 | 535.7105 | 534.7777 | 488.42   |
| 22807 | LOC119625 | 250.7622 | -0.11445 | 0.193426 | -0.59171 | 0.554044 | 0.645837 | 233.6392 | 298.3394 | 251.8548 | 245.534  | 213.9111 | 261.2947 |
| 23623 | LOC119625 | 115.579  | -0.11454 | 0.246018 | -0.46556 | 0.64153  | 0.721969 | 112.754  | 130.284  | 116.8829 | 109.3742 | 117.6511 | 106.5278 |
| 21761 | LOC103226 | 1419.158 | -0.11455 | 0.149403 | -0.76672 | 0.443249 | 0.541509 | 1644.69  | 1176.388 | 1604.357 | 1517.846 | 1247.102 | 1324.563 |
| 26238 | TRNAY-GU  | 1.108987 | -0.11456 | 2.252819 | -0.05085 | 0.959442 | 0.972139 | 1.626259 | 1.094824 | 0.695731 | 2.232127 | 0        | 1.004979 |
| 24023 | ZSCAN16   | 87.47417 | -0.11469 | 0.284526 | -0.40308 | 0.686887 | 0.76011  | 87.81799 | 88.68071 | 95.3152  | 78.12444 | 100.5382 | 74.36848 |
| 22308 | LOC103246 | 1533.216 | -0.11474 | 0.170335 | -0.67364 | 0.500543 | 0.59651  | 1330.28  | 2078.523 | 1374.765 | 1546.864 | 1309.136 | 1559.728 |
| 20703 | STXBP2    | 1062.249 | -0.11474 | 0.124622 | -0.92074 | 0.357188 | 0.45867  | 1135.129 | 1029.134 | 1154.914 | 1008.921 | 919.8176 | 1125.577 |
| 25947 | LOC119625 | 5.421213 | -0.1148  | 1.187386 | -0.09668 | 0.922981 | 0.945676 | 5.96295  | 4.926706 | 5.565851 | 2.232127 | 12.83466 | 1.004979 |
| 20722 | GPR89A    | 1080.632 | -0.11497 | 0.125622 | -0.91522 | 0.360078 | 0.461957 | 1076.584 | 1265.616 | 1029.682 | 984.368  | 1065.277 | 1062.263 |
| 19114 | LOC103228 | 2019.385 | -0.11502 | 0.098631 | -1.16614 | 0.243557 | 0.338756 | 2077.275 | 2052.794 | 2164.42  | 2017.843 | 1982.956 | 1821.023 |
| 19397 | NDE1      | 1368.165 | -0.11503 | 0.10287  | -1.1182  | 0.263482 | 0.361122 | 1437.071 | 1423.818 | 1406.073 | 1383.919 | 1255.658 | 1302.453 |
| 21887 | ZGPAT     | 994.2808 | -0.11515 | 0.154265 | -0.74642 | 0.455414 | 0.553167 | 1137.839 | 824.9496 | 1141.695 | 984.368  | 857.7834 | 1019.049 |
| 25963 | TRNAQ-CU  | 4.856084 | -0.11519 | 1.227348 | -0.09385 | 0.925226 | 0.947392 | 4.336691 | 7.116354 | 4.174388 | 4.464254 | 0        | 9.044815 |
| 21109 | NCOR1     | 10069.73 | -0.1152  | 0.133341 | -0.86395 | 0.387613 | 0.488166 | 9269.677 | 12957.24 | 9188.524 | 9578.057 | 9465.565 | 9959.347 |
| 20178 | FGFR1OP2  | 1499.185 | -0.1153  | 0.11524  | -1.00053 | 0.317053 | 0.417753 | 1675.047 | 1417.797 | 1582.093 | 1390.615 | 1548.716 | 1380.842 |
| 25941 | LOC119625 | 4.361727 | -0.11532 | 1.182801 | -0.0975  | 0.922332 | 0.945201 | 5.420864 | 4.379295 | 3.478657 | 4.464254 | 6.417332 | 2.009959 |
| 20503 | CBR4      | 1355.129 | -0.11535 | 0.121978 | -0.94564 | 0.344334 | 0.446477 | 1330.28  | 1589.136 | 1305.888 | 1274.545 | 1379.726 | 1251.199 |
| 25351 | LOC119626 | 17.72505 | -0.11544 | 0.608494 | -0.18971 | 0.849534 | 0.890886 | 18.43094 | 22.9913  | 13.91463 | 20.08914 | 12.83466 | 18.08963 |
| 23704 | LOC103246 | 109.954  | -0.11549 | 0.254943 | -0.453   | 0.650546 | 0.729614 | 115.4644 | 113.8617 | 112.0128 | 107.1421 | 119.7902 | 91.45313 |
| 19717 | LOC103235 | 2874.115 | -0.11558 | 0.108342 | -1.06685 | 0.286039 | 0.385675 | 2862.758 | 3301.441 | 2807.972 | 2700.874 | 2613.993 | 2957.655 |
| 19470 | SCG5      | 5573.203 | -0.11579 | 0.104751 | -1.10534 | 0.269011 | 0.367335 | 6198.758 | 5073.96  | 6118.957 | 5386.122 | 5236.543 | 5424.879 |
| 21616 | RHOT2     | 2867.48  | -0.11579 | 0.146896 | -0.78827 | 0.430539 | 0.529508 | 3283.417 | 2319.384 | 3349.251 | 2687.481 | 2526.29  | 3039.058 |
| 23478 | CCNK      | 287.2157 | -0.11592 | 0.237661 | -0.48776 | 0.625719 | 0.708506 | 229.8446 | 413.2959 | 253.2462 | 287.9444 | 254.5542 | 284.4092 |
| 19834 | DKC       | 1069.76  | -0.11596 | 0.110631 | -1.04814 | 0.294575 | 0.394841 | 1148.139 | 1095.918 | 1097.168 | 964.2789 | 1041.747 | 1071.308 |
| 23326 | SELENOO   | 1027.78  | -0.11606 | 0.227542 | -0.51004 | 0.610022 | 0.695252 | 1336.243 | 649.7778 | 1225.183 | 892.8508 | 855.6443 | 1206.98  |
| 19635 | ARPC2     | 13971.85 | -0.11613 | 0.107558 | -1.0797  | 0.280275 | 0.379481 | 13475.73 | 16665.41 | 13456.84 | 13816.87 | 13555.54 | 12860.72 |
| 20639 | ATP13A2   | 4226.98  | -0.11617 | 0.124943 | -0.92974 | 0.352504 | 0.454058 | 4704.768 | 3844.473 | 4648.877 | 4055.775 | 3542.367 | 4565.622 |
| 23212 | LOC103247 | 184.7974 | -0.11626 | 0.220274 | -0.52781 | 0.597631 | 0.684475 | 171.8414 | 229.3656 | 176.7158 | 176.338  | 162.5724 | 191.9511 |
| 26228 | LOC119625 | 1.094372 | -0.11637 | 2.260616 | -0.05148 | 0.958947 | 0.971812 | 1.084173 | 1.642235 | 0.695731 | 0        | 2.139111 | 1.004979 |
| 21670 | LOC103248 | 444.2943 | -0.11642 | 0.149091 | -0.78085 | 0.434891 | 0.533529 | 489.504  | 480.6276 | 417.4388 | 428.5684 | 406.431  | 443.1959 |
| 18831 | COP52     | 5239.446 | -0.11648 | 0.095947 | -1.21402 | 0.327438 | 0.317278 | 5246.854 | 5922.448 | 5179.024 | 5051.303 | 5215.152 | 4821.891 |
| 20177 | HDAC8     | 1127.485 | -0.11659 | 0.11653  | -1.00055 | 0.317043 | 0.417753 | 1154.102 | 1258.5   | 1107.604 | 1002.225 | 1138.007 | 1104.472 |
| 24891 | LOC119626 | 35.80874 | -0.1166  | 0.436729 | -0.26698 | 0.789488 | 0.843217 | 44.45108 | 28.46541 | 38.96096 | 35.71403 | 32.08666 | 35.17428 |
| 20765 | LOC103217 | 1185.718 | -0.11669 | 0.128363 | -0.90903 | 0.363336 | 0.465171 | 1175.243 | 1390.426 | 1138.912 | 1129.456 | 1048.164 | 1232.105 |
| 24241 | ZNF114    | 92.58442 | -0       |          |          |          |          |          |          |          |          |          |          |



|       |           |          |          |          |          |          |          |          |          |          |          |          |          |
|-------|-----------|----------|----------|----------|----------|----------|----------|----------|----------|----------|----------|----------|----------|
| 19390 | ACTR2     | 13821.54 | -0.11697 | 0.104516 | -1.11912 | 0.263088 | 0.360694 | 13463.8  | 16067.63 | 13618.94 | 12718.66 | 12736.26 | 14323.97 |
| 22235 | LOC103226 | 265.0221 | -0.11702 | 0.170357 | -0.68689 | 0.492152 | 0.588436 | 270.5011 | 274.2533 | 281.7712 | 249.9982 | 267.3888 | 246.22   |
| 25724 | LOC119621 | 9.653676 | -0.11702 | 0.890847 | -0.13136 | 0.895488 | 0.92547  | 11.9259  | 3.284471 | 15.30609 | 8.928508 | 6.417332 | 12.05975 |
| 20175 | AP3M1     | 4368.387 | -0.11704 | 0.116978 | -1.00056 | 0.317038 | 0.417753 | 4230.984 | 5314.274 | 4090.9   | 4209.791 | 4143.457 | 4220.914 |
| 24508 | LOC103241 | 79.24051 | -0.11707 | 0.354885 | -0.32988 | 0.741494 | 0.804289 | 103.5385 | 60.2153  | 81.40057 | 87.05295 | 91.98176 | 51.25395 |
| 21372 | TATDN3    | 590.4729 | -0.11711 | 0.142611 | -0.82118 | 0.411543 | 0.511925 | 610.3893 | 547.4118 | 684.5997 | 582.5851 | 571.1425 | 546.7088 |
| 24198 | ELAPOR1   | 67.18165 | -0.11713 | 0.313195 | -0.37398 | 0.708423 | 0.778305 | 73.18166 | 71.16354 | 66.09448 | 60.26743 | 62.03421 | 70.34856 |
| 18209 | DIABLO    | 4609.252 | -0.11728 | 0.090207 | -1.30017 | 0.193543 | 0.282571 | 4827.821 | 4547.35  | 5010.657 | 4477.647 | 4552.027 | 4240.008 |
| 26170 | CUNH19or  | 2.231169 | -0.11755 | 1.944194 | -0.06046 | 0.95179  | 0.96698  | 2.710432 | 3.284471 | 0.695731 | 6.696381 | 0        | 0        |
| 21136 | SIK3      | 1954.812 | -0.11755 | 0.136698 | -0.85993 | 0.389828 | 0.490304 | 1948.258 | 2412.444 | 1745.59  | 1741.059 | 1852.47  | 2029.054 |
| 18354 | DCUN1D1   | 3295.655 | -0.11762 | 0.092414 | -1.27272 | 0.203116 | 0.294205 | 3322.447 | 3617.297 | 3348.555 | 3078.103 | 3292.091 | 3115.436 |
| 26231 | LOC119615 | 1.110762 | -0.11791 | 2.288988 | -0.05151 | 0.958918 | 0.971812 | 0.542086 | 2.189647 | 0.695731 | 2.232127 | 0        | 1.004979 |
| 25177 | LOC103227 | 24.60744 | -0.11793 | 0.54225  | -0.21748 | 0.827832 | 0.874106 | 31.9831  | 20.80165 | 22.95914 | 29.01765 | 27.80844 | 15.07469 |
| 22066 | PPIG      | 3823.251 | -0.11804 | 0.165221 | -0.71441 | 0.474974 | 0.572246 | 3329.494 | 5298.946 | 3310.29  | 3444.172 | 3831.147 | 3725.459 |
| 24632 | LOC119626 | 51.03409 | -0.11817 | 0.380753 | -0.31035 | 0.756293 | 0.816257 | 58.54533 | 53.09895 | 47.30973 | 35.71403 | 66.31243 | 45.22408 |
| 19833 | ATF2      | 4796.467 | -0.1185  | 0.113055 | -1.04817 | 0.294561 | 0.394841 | 4654.354 | 5766.983 | 4559.823 | 4459.79  | 4620.479 | 4717.374 |
| 19979 | ARSK      | 847.1541 | -0.11871 | 0.114877 | -1.03337 | 0.301429 | 0.401096 | 900.4055 | 861.0788 | 887.0575 | 790.173  | 800.0274 | 844.1828 |
| 25795 | LOC119618 | 6.905774 | -0.11874 | 0.98568  | -0.12047 | 0.904111 | 0.931801 | 7.047123 | 7.116354 | 6.957314 | 4.464254 | 12.83466 | 6.014938 |
| 21305 | MARCHF5   | 1017.654 | -0.1188  | 0.142704 | -0.83246 | 0.405148 | 0.505556 | 1164.944 | 932.2423 | 1086.732 | 837.0476 | 992.5473 | 1092.413 |
| 19240 | UBAC1     | 2681.116 | -0.1188  | 0.103671 | -1.14592 | 0.251829 | 0.347966 | 2785.782 | 2858.584 | 2734.92  | 2656.231 | 2299.544 | 2751.634 |
| 18585 | ALDH3A2   | 8778.896 | -0.11881 | 0.096029 | -1.23722 | 0.216007 | 0.308988 | 9290.276 | 9362.384 | 8776.651 | 8028.961 | 7953.213 | 9261.891 |
| 19325 | DGKA      | 3185.857 | -0.11885 | 0.105058 | -1.13124 | 0.257953 | 0.354861 | 3242.219 | 3529.711 | 3186.45  | 2935.247 | 2857.852 | 3363.666 |
| 25768 | LOC103221 | 6.686542 | -0.11885 | 0.95332  | -0.12467 | 0.900787 | 0.929347 | 8.673382 | 5.474118 | 6.957314 | 6.696381 | 4.278221 | 8.039836 |
| 22270 | ING3      | 274.138  | -0.11902 | 0.175286 | -0.679   | 0.497136 | 0.593461 | 280.2587 | 309.8351 | 264.3779 | 279.0159 | 263.1106 | 248.2299 |
| 19523 | TBCK      | 1589.191 | -0.11936 | 0.108787 | -1.09717 | 0.272569 | 0.371164 | 1755.276 | 1540.964 | 1671.842 | 1426.329 | 1550.855 | 1589.878 |
| 20345 | UBL4A     | 2459.851 | -0.11937 | 0.123062 | -0.96997 | 0.332059 | 0.433893 | 2704.469 | 2434.888 | 2554.03  | 2270.073 | 2062.103 | 2733.544 |
| 20241 | YIPF6     | 1792.067 | -0.11941 | 0.120736 | -0.989   | 0.322664 | 0.423795 | 2004.635 | 1667.964 | 1932.046 | 1573.65  | 1687.758 | 1886.346 |
| 20434 | RPP40     | 706.3289 | -0.11947 | 0.124881 | -0.95665 | 0.338745 | 0.440714 | 733.4429 | 719.2991 | 750.6941 | 674.1023 | 727.2976 | 633.1371 |
| 25506 | LOC119628 | 14.00113 | -0.11963 | 0.733059 | -0.1632  | 0.870364 | 0.907219 | 10.84173 | 18.06459 | 13.91463 | 22.32127 | 12.83466 | 6.029877 |
| 21073 | TMEM218   | 887.651  | -0.11965 | 0.137587 | -0.86962 | 0.384507 | 0.485081 | 980.6342 | 808.5272 | 980.2855 | 857.1368 | 930.5131 | 768.8093 |
| 20413 | RRP8      | 734.3526 | -0.11965 | 0.124737 | -0.95925 | 0.337435 | 0.439461 | 782.2306 | 731.8896 | 784.0893 | 694.1915 | 660.9852 | 752.7296 |
| 22001 | PALD1     | 604.5729 | -0.1198  | 0.164799 | -0.72695 | 0.467255 | 0.564609 | 681.9447 | 503.6189 | 706.1673 | 571.4245 | 541.195  | 623.0873 |
| 19507 | CFL1      | 12264.55 | -0.11983 | 0.108938 | -1.09997 | 0.271344 | 0.369781 | 12363.36 | 14272.12 | 11691.07 | 11546.79 | 10877.38 | 12836.6  |
| 19726 | ZRANB1    | 2479.771 | -0.1199  | 0.112628 | -1.06459 | 0.287063 | 0.386877 | 2466.493 | 2908.399 | 2375.923 | 2361.59  | 2273.875 | 2492.349 |
| 20267 | TRAF4     | 1554.836 | -0.12    | 0.121795 | -0.98527 | 0.32449  | 0.425646 | 1678.841 | 1537.68  | 1649.579 | 1446.418 | 1324.11  | 1692.385 |
| 21722 | LOC103241 | 719.6723 | -0.12    | 0.154895 | -0.77475 | 0.438489 | 0.536655 | 658.6349 | 896.1131 | 695.0356 | 716.5128 | 633.1768 | 718.5603 |
| 21491 | RBM45     | 653.4148 | -0.12009 | 0.149228 | -0.80476 | 0.420958 | 0.520738 | 773.5572 | 625.6917 | 644.943  | 546.8711 | 663.1243 | 666.3014 |
| 21146 | SLC29A2   | 511.6608 | -0.12026 | 0.140062 | -0.85865 | 0.390535 | 0.490985 | 545.881  | 527.705  | 528.0601 | 437.4969 | 511.2474 | 519.5744 |
| 24823 | LOC119621 | 38.5691  | -0.12049 | 0.43451  | -0.27729 | 0.781555 | 0.836998 | 36.31979 | 45.43518 | 40.35242 | 31.24978 | 27.80844 | 50.24897 |
| 19308 | ENTPD7    | 2531.764 | -0.12054 | 0.106354 | -1.13342 | 0.257039 | 0.353915 | 2577.079 | 2818.623 | 2523.418 | 2312.484 | 2303.822 | 2655.156 |
| 20901 | LOC119615 | 769.2195 | -0.12056 | 0.135396 | -0.89043 | 0.373236 | 0.474737 | 797.9511 | 898.3028 | 708.2545 | 729.9055 | 725.1585 | 755.7446 |
| 23043 | TMEM17    | 151.2316 | -0.12069 | 0.217378 | -0.55521 | 0.578748 | 0.667686 | 158.8313 | 155.465  | 158.6268 | 156.2489 | 130.4858 | 147.732  |
| 17381 | SPRY2     | 4945.744 | -0.12082 | 0.084339 | -1.43255 | 0.151987 | 0.232471 | 5188.851 | 5251.322 | 5019.702 | 4810.234 | 4573.419 | 4830.936 |
| 21135 | DVL1      | 3082.084 | -0.12084 | 0.140482 | -0.86017 | 0.389695 | 0.490184 | 3484.531 | 2641.809 | 3512.052 | 3031.228 | 2530.568 | 3292.313 |
| 18622 | NUP98     | 9319.333 | -0.12087 | 0.097904 | -1.23462 | 0.216974 | 0.309867 | 9435.013 | 10524.54 | 9175.305 | 8557.975 | 8603.503 | 9619.663 |
| 18929 | SNX7      | 1682.696 | -0.12088 | 0.100834 | -1.19876 | 0.230621 | 0.323897 | 1750.397 | 1759.929 | 1749.764 | 1508.918 | 1709.149 | 1618.017 |
| 23577 | LOC119618 | 116.2524 | -0.12092 | 0.25595  | -0.47245 | 0.636608 | 0.717803 | 101.9122 | 129.7366 | 131.4932 | 104.91   | 121.9293 | 107.5328 |
| 18508 | CUNH5orf  | 3878.894 | -0.12131 | 0.097072 | -1.24972 | 0.211403 | 0.303661 | 3903.022 | 4413.781 | 3807.042 | 3741.045 | 3741.305 | 3667.17  |
| 22860 | LOC103226 | 226.1108 | -0.12142 | 0.207769 | -0.58441 | 0.558947 | 0.650026 | 271.5853 | 191.5941 | 244.8974 | 209.8199 | 209.6328 | 229.1353 |
| 25870 | LOC103230 | 6.371792 | -0.12153 | 1.125458 | -0.10799 | 0.914006 | 0.939268 | 3.252518 | 6.568942 | 10.43597 | 8.928508 | 0        | 9.044815 |
| 26099 | LOC119621 | 2.617051 | -0.1216  | 1.704734 | -0.07133 | 0.943137 | 0.960702 | 0.542086 | 3.284471 | 4.174388 | 6.696381 | 0        | 1.004979 |
| 24842 | LOC119621 | 35.80735 | -0.12175 | 0.443394 | -0.27458 | 0.783637 | 0.838619 | 29.81475 | 36.12918 | 45.22254 | 40.17829 | 36.36488 | 27.13445 |
| 22019 | FAM189B   | 297.7946 | -0.1218  | 0.168607 | -0.72238 | 0.470058 | 0.56752  | 288.932  | 326.2574 | 317.9492 | 265.6231 | 284.5017 | 303.5038 |
| 25710 | LOC119618 | 8.930222 | -0.1218  | 0.91286  | -0.13343 | 0.893853 | 0.924274 | 10.29964 | 8.211177 | 9.044508 | 17.85702 | 2.139111 | 6.029877 |
| 19542 | CHMP3     | 2172.49  | -0.1219  | 0.111656 | -1.09172 | 0.274958 | 0.374054 | 2118.474 | 2554.224 | 2119.198 | 2095.967 | 2072.798 | 2074.278 |
| 25489 | LOC119621 | 12.47679 | -0.12209 | 0.734147 | -0.1663  | 0.867921 | 0.90524  | 15.17842 | 8.758589 | 14.61036 | 11.16063 | 17.11289 | 8.039836 |
| 19743 | ABL2      | 5333.126 | -0.12211 | 0.115038 | -1.06145 | 0.288487 | 0.388474 | 5418.695 | 6328.628 | 4932.735 | 4825.859 | 5007.658 | 5485.178 |
| 18112 | PSMB6     | 3986.443 | -0.12231 | 0.092731 | -1.319   | 0.187169 | 0.274729 | 4339.943 | 3858.158 | 4269.703 | 3830.33  | 3741.305 | 3879.221 |
| 23516 | LOC103248 | 107.5371 | -0.12233 | 0.254331 | -0.48099 | 0.630527 | 0.712815 | 111.1277 | 122.0728 | 102.9682 | 107.1421 | 98.39909 | 103.5129 |
| 21395 | LOC103231 | 555.9424 | -0.12253 | 0.149905 | -0.81737 | 0.41372  | 0.51408  | 558.349  | 641.5666 | 541.279  | 462.0503 | 562.5861 | 569.8234 |
| 24318 | LOC103248 | 59.56332 | -0.12254 | 0.341578 | -0.35874 | 0.719792 | 0.786893 | 59.08741 | 56.93083 | 69.57314 | 69.19594 | 51.33866 | 51.25395 |
| 22528 | CCDC167   | 582.9336 | -0.12255 | 0.19257  | -0.63638 | 0.524526 | 0.618986 | 690.618  | 430.2657 | 703.3844 | 573.6566 | 519.8039 | 579.8732 |
| 19371 | ITPR1     | 2455.815 | -0.12256 | 0.109048 | -1.12392 | 0.261046 | 0.358244 | 2442.641 | 2806.033 | 2432.973 | 2468.732 | 2160.502 | 2424.01  |
| 20205 | WDR59     | 1395.25  | -0.12262 | 0.123122 | -0.99595 | 0.319276 | 0.420091 | 1527.599 | 1445.167 | 1398.42  | 1254.455 | 1219.293 | 1526.564 |
| 18864 | FAM136A   | 1466.389 | -0.12273 | 0.10141  | -1.21023 | 0.226192 | 0.318772 | 1495.616 | 1601.727 | 1487.474 | 1404.008 | 1424.648 | 1384.862 |
| 23468 | LOC119621 | 121.7772 | -0.12288 | 0.250951 | -0.48967 | 0.624367 | 0.707295 | 130.6428 | 110.5772 | 139.1463 | 133.9276 | 104.8164 | 111.5527 |
| 18091 | DNAJC18   | 2575.183 | -0.12292 | 0.092912 | -1.32295 | 0.185853 | 0.273115 | 2686.58  | 2726.111 | 2646.562 | 2348.198 | 2457.838 | 2585.812 |
| 19750 | KRIT1     | 3721.189 | -0.12294 | 0.115944 | -1.0603  | 0.289009 | 0.389028 | 3626.016 | 4486.587 | 3525.271 | 3446.404 | 3711.357 | 3531.498 |
| 20016 | ZSWIM4    | 820.2167 | -0.12296 | 0.11986  | -1.02587 | 0.304953 | 0.405034 | 899.3213 | 828.2341 | 841.1392 | 756.691  | 765.8016 | 830.113  |
| 19296 | CLIC1     | 21829.04 | -0.12298 | 0.108226 | -1.13634 | 0.255812 | 0.352445 | 24855.2  | 20186.36 | 23241.6  | 20564.59 | 19354.67 | 22771.83 |
| 21540 | SAFB2     | 2238.641 | -0.12301 | 0.15402  |          |          |          |          |          |          |          |          |          |



|       |           |          |          |          |          |          |          |          |          |          |          |          |          |
|-------|-----------|----------|----------|----------|----------|----------|----------|----------|----------|----------|----------|----------|----------|
| 22551 | WDR18     | 689.0539 | -0.12332 | 0.195165 | -0.6319  | 0.527455 | 0.621808 | 799.5774 | 530.9895 | 827.2246 | 732.1376 | 519.8039 | 724.5902 |
| 25930 | LOC119622 | 4.074487 | -0.12335 | 1.231677 | -0.10015 | 0.920224 | 0.943469 | 2.168345 | 6.568942 | 4.174388 | 2.232127 | 4.278221 | 5.024897 |
| 20955 | ZFC3H1    | 2772.138 | -0.12345 | 0.139568 | -0.88451 | 0.376423 | 0.477557 | 2508.776 | 3568.578 | 2593.687 | 2749.98  | 2579.767 | 2632.041 |
| 18676 | UBA6      | 3562.941 | -0.12348 | 0.100263 | -1.23157 | 0.218111 | 0.310478 | 3621.137 | 4052.49  | 3475.178 | 3392.833 | 3281.396 | 3554.612 |
| 20131 | PTPRU     | 2363.546 | -0.12361 | 0.122723 | -1.00725 | 0.313813 | 0.414421 | 2620.988 | 2220.302 | 2560.291 | 2214.27  | 2010.764 | 2554.658 |
| 20412 | GOLM2     | 6524.102 | -0.12363 | 0.128855 | -0.95944 | 0.337338 | 0.439355 | 6136.96  | 8289.457 | 5983.29  | 6200.849 | 6291.124 | 6242.932 |
| 19919 | PSMF1     | 1851.706 | -0.12373 | 0.118484 | -1.04429 | 0.29635  | 0.395525 | 1777.501 | 2181.983 | 1837.427 | 1703.113 | 1719.845 | 1890.366 |
| 20348 | DHX58     | 837.7405 | -0.12404 | 0.127958 | -0.96936 | 0.332367 | 0.434243 | 941.0619 | 799.7687 | 884.2746 | 767.8517 | 772.219  | 861.2674 |
| 19050 | MAD11L    | 1514.405 | -0.12405 | 0.105338 | -1.17761 | 0.238952 | 0.333526 | 1647.4   | 1528.921 | 1566.787 | 1424.097 | 1377.587 | 1541.639 |
| 25827 | LRRD1     | 5.176043 | -0.12407 | 1.068175 | -0.11615 | 0.907531 | 0.934185 | 5.420864 | 4.379295 | 6.261582 | 6.696381 | 4.278221 | 4.019918 |
| 22868 | LOC103246 | 177.8241 | -0.12407 | 0.212674 | -0.5834  | 0.559623 | 0.650585 | 190.2723 | 182.2881 | 186.456  | 169.6417 | 143.3204 | 194.966  |
| 22791 | LOC103218 | 272.8662 | -0.12411 | 0.208981 | -0.59386 | 0.552604 | 0.644596 | 316.0364 | 226.6285 | 314.4706 | 245.534  | 231.024  | 303.5038 |
| 21613 | PDCL3     | 1116.034 | -0.12422 | 0.15742  | -0.78909 | 0.430059 | 0.528993 | 1005.57  | 1456.663 | 1027.595 | 1120.528 | 1073.834 | 1012.014 |
| 22005 | PDE1C     | 502.5512 | -0.12423 | 0.171281 | -0.72532 | 0.468257 | 0.565717 | 474.8677 | 608.7219 | 485.6205 | 453.1218 | 566.8643 | 426.1113 |
| 24642 | LOC103228 | 45.09653 | -0.12432 | 0.40291  | -0.30856 | 0.757656 | 0.817396 | 57.46116 | 35.03436 | 48.00546 | 49.10679 | 42.78221 | 38.18922 |
| 21408 | ZBTB2     | 872.8682 | -0.12433 | 0.152395 | -0.81581 | 0.414608 | 0.514935 | 804.9983 | 1096.466 | 830.7033 | 877.2259 | 761.5234 | 866.2923 |
| 19644 | CSRNP2    | 1211.238 | -0.12436 | 0.115321 | -1.0784  | 0.280854 | 0.380084 | 1268.482 | 1328.568 | 1198.049 | 1071.421 | 1148.702 | 1252.204 |
| 18512 | SERPINB6  | 1797.732 | -0.12455 | 0.099682 | -1.24946 | 0.211497 | 0.303746 | 1808.4   | 1963.019 | 1852.037 | 1796.862 | 1687.758 | 1678.316 |
| 19937 | BRD8      | 4495.084 | -0.1246  | 0.119668 | -1.0412  | 0.297785 | 0.397081 | 4219.6   | 5469.191 | 4381.716 | 4234.345 | 4089.98  | 4575.672 |
| 18158 | PNRC2     | 3518.657 | -0.12462 | 0.095062 | -1.31089 | 0.189893 | 0.278021 | 3485.615 | 3960.524 | 3563.536 | 3419.619 | 3371.238 | 3311.407 |
| 20756 | PRPSAP1   | 1258.288 | -0.12464 | 0.136897 | -0.91047 | 0.362573 | 0.464437 | 1405.088 | 1126.026 | 1412.335 | 1082.582 | 1185.067 | 1338.633 |
| 20397 | KIF21A    | 4562.715 | -0.12468 | 0.129623 | -0.96189 | 0.336106 | 0.438074 | 4287.361 | 5773.005 | 4218.915 | 4220.952 | 4462.185 | 4413.87  |
| 19431 | PARG      | 3495.785 | -0.12475 | 0.112091 | -1.11295 | 0.265729 | 0.363564 | 3377.198 | 4179.489 | 3384.733 | 3314.709 | 3300.648 | 3417.935 |
| 22456 | SMDT1     | 1087.555 | -0.1248  | 0.192389 | -0.64869 | 0.516541 | 0.611518 | 1305.886 | 752.1438 | 1346.936 | 1058.028 | 983.9909 | 1078.343 |
| 24715 | SLC16A10  | 43.00697 | -0.1248  | 0.421853 | -0.29585 | 0.767346 | 0.825324 | 50.41403 | 39.96106 | 43.13534 | 33.4819  | 59.8951  | 31.15436 |
| 26242 | TRNAV-AA  | 1.440257 | -0.12484 | 2.485396 | -0.05023 | 0.95994  | 0.972487 | 1.626259 | 2.737059 | 0        | 0        | 4.278221 | 0        |
| 19505 | ATG101    | 1687.631 | -0.12493 | 0.113553 | -1.10021 | 0.271242 | 0.369699 | 1888.629 | 1603.917 | 1794.291 | 1515.614 | 1595.777 | 1727.56  |
| 19972 | COMMD1C   | 2320.937 | -0.12495 | 0.120846 | -1.03399 | 0.301142 | 0.400854 | 2494.681 | 2070.859 | 2696.655 | 2263.377 | 2284.57  | 2115.482 |
| 18573 | UBTD2     | 2481.615 | -0.12533 | 0.101136 | -1.23926 | 0.215251 | 0.308106 | 2444.267 | 2796.727 | 2529.679 | 2381.679 | 2278.153 | 2459.185 |
| 21096 | FOXJ2     | 1291.219 | -0.12534 | 0.144793 | -0.86564 | 0.386688 | 0.487326 | 1204.516 | 1613.223 | 1227.966 | 1151.778 | 1185.067 | 1364.762 |
| 18094 | EXOC5     | 6632.716 | -0.12564 | 0.094986 | -1.32275 | 0.18592  | 0.273167 | 6648.689 | 7534.576 | 6584.402 | 6241.027 | 6162.778 | 6624.825 |
| 19306 | PPP2R5A   | 1902.442 | -0.12613 | 0.111267 | -1.13357 | 0.256973 | 0.353842 | 2083.238 | 1940.575 | 1936.916 | 1899.54  | 1610.75  | 1943.63  |
| 17216 | HYAL1     | 10683.78 | -0.12639 | 0.086254 | -1.46535 | 0.142826 | 0.220552 | 11206.55 | 11363.17 | 10891.67 | 10064.66 | 9698.728 | 10877.9  |
| 20022 | MAGAT1    | 4119.325 | -0.12654 | 0.12354  | -1.02431 | 0.305689 | 0.40589  | 4669.532 | 3673.133 | 4563.302 | 3834.794 | 3606.541 | 4368.646 |
| 20182 | KLHL28    | 664.8941 | -0.12661 | 0.126604 | -1.00001 | 0.317305 | 0.417974 | 733.4429 | 660.1786 | 689.4698 | 649.549  | 607.5074 | 649.2167 |
| 26144 | LOC103235 | 1.508394 | -0.12668 | 1.957982 | -0.0647  | 0.948414 | 0.964412 | 1.626259 | 1.094824 | 2.087194 | 2.232127 | 0        | 2.009959 |
| 19714 | LOC103245 | 1544.823 | -0.12671 | 0.118711 | -1.06737 | 0.285805 | 0.385445 | 1749.313 | 1603.917 | 1490.257 | 1399.544 | 1396.839 | 1629.072 |
| 18684 | HSPA14    | 1708.949 | -0.12673 | 0.102936 | -1.23117 | 0.218259 | 0.310556 | 1787.801 | 1762.666 | 1796.378 | 1627.221 | 1754.071 | 1525.559 |
| 24338 | LOC119615 | 68.14345 | -0.12676 | 0.355529 | -0.35654 | 0.72144  | 0.788014 | 73.18166 | 78.27989 | 59.8329  | 62.49956 | 89.84265 | 45.22408 |
| 21099 | LOC103218 | 684.7694 | -0.12684 | 0.146589 | -0.86527 | 0.386892 | 0.487489 | 643.4565 | 818.9281 | 680.4253 | 718.7449 | 613.9248 | 633.1371 |
| 20787 | VPS72     | 1908.526 | -0.12689 | 0.140009 | -0.90632 | 0.364769 | 0.466511 | 1773.707 | 2431.056 | 1769.941 | 1904.004 | 1826.801 | 1745.649 |
| 24214 | LOC119627 | 78.81756 | -0.12698 | 0.341809 | -0.3715  | 0.710268 | 0.779816 | 79.14461 | 89.22813 | 76.53045 | 62.49956 | 111.2338 | 54.26889 |
| 18759 | FMNL2     | 6316.212 | -0.12721 | 0.103972 | -1.22353 | 0.221131 | 0.313384 | 6212.31  | 7403.197 | 6170.442 | 6049.064 | 5784.155 | 6278.107 |
| 18803 | NICN1     | 1452.501 | -0.12724 | 0.104566 | -1.21687 | 0.223654 | 0.316218 | 1493.99  | 1544.796 | 1515.999 | 1354.901 | 1321.97  | 1483.35  |
| 19350 | UBE2Q1    | 3507.244 | -0.12734 | 0.113024 | -1.12668 | 0.259878 | 0.357048 | 3438.454 | 4198.101 | 3350.642 | 3339.262 | 3257.866 | 3459.139 |
| 17994 | SELENOI   | 5811.935 | -0.12741 | 0.094773 | -1.34435 | 0.178834 | 0.264216 | 6471.427 | 5879.75  | 5860.145 | 5408.444 | 5311.412 | 5940.434 |
| 26056 | LOC103230 | 2.953302 | -0.12743 | 1.663233 | -0.07662 | 0.938929 | 0.957992 | 2.168345 | 0.547412 | 6.261582 | 4.464254 | 4.278221 | 0        |
| 23923 | GRK4      | 82.59339 | -0.12758 | 0.304153 | -0.41946 | 0.674878 | 0.749975 | 88.90216 | 82.65918 | 85.57496 | 71.42806 | 102.6773 | 64.31869 |
| 16991 | MTMR6     | 3994.114 | -0.12759 | 0.085406 | -1.49392 | 0.135196 | 0.211535 | 4188.159 | 4045.921 | 4280.139 | 3745.509 | 3824.73  | 3880.226 |
| 25648 | LOC103247 | 8.080163 | -0.12766 | 0.895626 | -0.14254 | 0.886653 | 0.919045 | 6.505036 | 8.211177 | 10.43597 | 4.464254 | 12.83466 | 6.029877 |
| 22324 | TMEM170   | 231.6718 | -0.12775 | 0.190414 | -0.67093 | 0.502264 | 0.598132 | 270.5011 | 219.5121 | 236.5487 | 207.5878 | 226.7457 | 229.1353 |
| 24639 | LOC119626 | 44.56102 | -0.12797 | 0.414147 | -0.30899 | 0.757326 | 0.817107 | 48.78777 | 50.9093  | 38.26523 | 44.64254 | 55.61688 | 29.1444  |
| 18743 | IFT80     | 4355.128 | -0.12804 | 0.104468 | -1.22564 | 0.220333 | 0.312519 | 4366.506 | 5103.52  | 4173.692 | 4127.203 | 4218.326 | 4141.52  |
| 21125 | SCFD2     | 564.5276 | -0.12815 | 0.14878  | -0.86137 | 0.389036 | 0.489591 | 546.4231 | 651.4201 | 575.3698 | 493.3001 | 517.6648 | 602.9877 |
| 19314 | ZNF76     | 1103.347 | -0.1282  | 0.113223 | -1.13223 | 0.257536 | 0.354432 | 1155.186 | 1143.543 | 1163.959 | 1022.314 | 990.4092 | 1144.672 |
| 21024 | RGL3      | 437.1598 | -0.12822 | 0.146238 | -0.8768  | 0.380596 | 0.481266 | 428.7903 | 489.3862 | 450.1382 | 417.4077 | 434.2385 | 402.9968 |
| 25112 | LOC103227 | 22.16306 | -0.12824 | 0.561335 | -0.22846 | 0.819287 | 0.867327 | 30.89892 | 15.87494 | 22.2634  | 22.32127 | 23.53022 | 18.08963 |
| 21050 | EML3      | 1364.717 | -0.12829 | 0.147019 | -0.87263 | 0.382865 | 0.483532 | 1591.566 | 1186.789 | 1503.475 | 1256.687 | 1159.398 | 1490.385 |
| 22213 | ASB13     | 419.9125 | -0.12834 | 0.185974 | -0.69008 | 0.490146 | 0.586617 | 462.9418 | 338.3005 | 515.5369 | 415.1756 | 376.4835 | 411.0366 |
| 18140 | LOC103245 | 3081.039 | -0.12843 | 0.097689 | -1.31468 | 0.188616 | 0.276426 | 3090.434 | 3437.199 | 3131.487 | 2850.426 | 2864.269 | 3112.421 |
| 20885 | CBWD1     | 1278.254 | -0.12846 | 0.143979 | -0.89223 | 0.37227  | 0.473871 | 1224.031 | 1624.171 | 1157.001 | 1212.045 | 1217.154 | 1235.12  |
| 18153 | GNG12     | 5400.021 | -0.12856 | 0.097962 | -1.31232 | 0.189412 | 0.277393 | 5342.261 | 6203.818 | 5378.003 | 5102.642 | 5026.91  | 5346.491 |
| 25855 | LOC119627 | 5.102711 | -0.12871 | 1.162693 | -0.1107  | 0.911854 | 0.93763  | 3.794605 | 4.926706 | 6.957314 | 2.232127 | 10.69555 | 2.009959 |
| 21075 | SLC03A1   | 815.2166 | -0.1288  | 0.148184 | -0.86918 | 0.384749 | 0.485355 | 797.409  | 955.2336 | 807.7441 | 667.406  | 770.0798 | 893.4267 |
| 21416 | CXCL14    | 5144.608 | -0.12896 | 0.158191 | -0.81524 | 0.414933 | 0.515057 | 4402.825 | 7061.065 | 4657.922 | 5113.803 | 4832.251 | 4799.782 |
| 22147 | LOC103214 | 314.9989 | -0.12898 | 0.184227 | -0.70009 | 0.48387  | 0.580831 | 312.7838 | 368.9556 | 303.3389 | 272.3195 | 357.2315 | 275.3644 |
| 24202 | LOC103225 | 59.49346 | -0.12898 | 0.345146 | -0.3737  | 0.708626 | 0.778399 | 67.7608  | 60.76271 | 56.35424 | 66.96381 | 59.8951  | 45.22408 |
| 19131 | LOC103225 | 1357.96  | -0.12899 | 0.110807 | -1.16411 | 0.244379 | 0.339596 | 1443.576 | 1433.124 | 1385.201 | 1263.384 | 1206.458 | 1416.016 |
| 24435 | LOC119627 | 87.96985 | -0.12914 | 0.380094 | -0.33975 | 0.734043 | 0.798631 | 120.8853 | 48.17224 | 107.8384 | 64.73168 | 87.70354 | 98.48799 |
| 20125 | MAP3K4    | 3337.507 | -0.12919 | 0.128103 | -1.0085  | 0.313212 | 0.413751 | 3264.444 | 4141.718 | 3057.044 | 3024.532 | 3144.493 | 3392.811 |
| 23412 | LOC119625 | 108.0446 | -0.12928 |          |          |          |          |          |          |          |          |          |          |



|       |           |          |          |          |          |          |          |          |          |          |          |          |          |
|-------|-----------|----------|----------|----------|----------|----------|----------|----------|----------|----------|----------|----------|----------|
| 19804 | LOC103232 | 1236.867 | -0.12963 | 0.123136 | -1.05278 | 0.292442 | 0.392576 | 1205.058 | 1444.62  | 1231.445 | 1133.921 | 1135.868 | 1270.294 |
| 25154 | SCG2      | 23.34941 | -0.12972 | 0.587377 | -0.22085 | 0.825209 | 0.872155 | 23.8518  | 25.72836 | 22.2634  | 37.94616 | 19.252   | 11.05477 |
| 25319 | LOC10324  | 15.30873 | -0.13012 | 0.660903 | -0.19688 | 0.84392  | 0.886117 | 15.17842 | 14.23271 | 19.48048 | 11.16063 | 10.69555 | 21.10457 |
| 26962 | TSHB      | 0.489755 | -0.13014 | 3.62671  | -0.03588 | 0.971375 | NA       | 0.542086 | 0        | 1.391463 | 0        | 0        | 1.004979 |
| 20736 | PAXIP1    | 1476.736 | -0.13015 | 0.142575 | -0.91286 | 0.361314 | 0.463229 | 1383.404 | 1883.644 | 1363.633 | 1388.383 | 1386.144 | 1455.21  |
| 19353 | TRERF1    | 1344.228 | -0.13015 | 0.115548 | -1.12639 | 0.260001 | 0.357151 | 1338.411 | 1559.029 | 1318.411 | 1272.312 | 1255.658 | 1321.548 |
| 18075 | DENND5A   | 5729.4   | -0.13019 | 0.098    | -1.32852 | 0.184008 | 0.270642 | 6017.701 | 6229.546 | 5723.782 | 5316.926 | 5101.779 | 5986.663 |
| 20505 | RWDD3     | 536.8488 | -0.13023 | 0.137774 | -0.94522 | 0.344547 | 0.44671  | 547.5072 | 566.0238 | 565.6296 | 529.0141 | 547.6123 | 465.3055 |
| 19222 | TTC31     | 1045.733 | -0.13025 | 0.113216 | -1.15043 | 0.249966 | 0.345715 | 1103.688 | 1105.224 | 1072.818 | 915.1721 | 1035.33  | 1042.164 |
| 23029 | FAM71E1   | 172.8926 | -0.1303  | 0.233841 | -0.55723 | 0.577368 | 0.666522 | 196.7774 | 140.1374 | 205.9365 | 169.6417 | 154.016  | 170.8465 |
| 18316 | ZDHHIC17  | 1568.429 | -0.13031 | 0.101814 | -1.27985 | 0.200597 | 0.291147 | 1712.451 | 1580.378 | 1626.62  | 1522.311 | 1433.204 | 1535.609 |
| 18237 | FLNB      | 26061.1  | -0.13033 | 0.100698 | -1.2943  | 0.19556  | 0.285047 | 26526.45 | 28984.91 | 26209.59 | 24403.84 | 22685.27 | 27556.54 |
| 19187 | ISG20L2   | 1345.61  | -0.13042 | 0.112792 | -1.15626 | 0.247574 | 0.343032 | 1380.152 | 1519.068 | 1323.281 | 1267.848 | 1223.571 | 1359.737 |
| 18384 | LOC10323  | 1423.242 | -0.13043 | 0.102894 | -1.26759 | 0.204946 | 0.296443 | 1426.771 | 1509.762 | 1525.043 | 1417.401 | 1319.831 | 1340.643 |
| 20007 | WDR6      | 8714.431 | -0.13044 | 0.12684  | -1.0284  | 0.30376  | 0.403632 | 10140.27 | 7919.407 | 9272.708 | 7955.301 | 7418.436 | 9580.469 |
| 23586 | LOC10322  | 99.34692 | -0.1305  | 0.277243 | -0.47069 | 0.637861 | 0.718967 | 111.6698 | 107.2927 | 91.14081 | 87.05295 | 115.512  | 83.4133  |
| 21045 | IRF2BP1   | 738.9439 | -0.13054 | 0.149362 | -0.87398 | 0.382132 | 0.482726 | 801.2037 | 693.0234 | 825.8331 | 767.8517 | 583.9772 | 761.7744 |
| 18865 | BICD2     | 2273.108 | -0.13057 | 0.107917 | -1.20995 | 0.226297 | 0.318904 | 2384.096 | 2417.371 | 2334.179 | 2109.36  | 1978.677 | 2414.966 |
| 20798 | BDP1      | 5430.133 | -0.13062 | 0.144395 | -0.9046  | 0.365676 | 0.467444 | 5105.369 | 7160.147 | 4762.281 | 4903.983 | 5330.664 | 5318.351 |
| 18388 | PLEKHO1   | 2046.351 | -0.13075 | 0.103231 | -1.26657 | 0.205308 | 0.296831 | 2115.221 | 2232.893 | 2074.671 | 1924.093 | 1826.801 | 2104.427 |
| 19120 | TP53RK    | 1386.733 | -0.13099 | 0.11243  | -1.16506 | 0.243994 | 0.339257 | 1411.051 | 1586.399 | 1351.806 | 1350.437 | 1277.049 | 1343.658 |
| 25719 | ZNF625    | 8.413538 | -0.13101 | 0.994029 | -0.1318  | 0.895143 | 0.925284 | 8.131296 | 9.853413 | 8.348776 | 0        | 17.11289 | 7.034856 |
| 24458 | TMEM265   | 54.73792 | -0.13104 | 0.389072 | -0.33681 | 0.736258 | 0.800255 | 62.33993 | 54.19377 | 52.87558 | 66.96381 | 59.8951  | 32.15934 |
| 18257 | GNE       | 2073.865 | -0.13107 | 0.101429 | -1.29219 | 0.19629  | 0.285829 | 2251.285 | 2171.035 | 2087.194 | 1933.022 | 1878.139 | 2122.517 |
| 19396 | ELOF1     | 2283.211 | -0.13108 | 0.117211 | -1.1183  | 0.26344  | 0.361082 | 2592.257 | 2141.475 | 2432.973 | 2002.218 | 2145.528 | 2384.816 |
| 24690 | LOC10324  | 33.39089 | -0.13108 | 0.435705 | -0.30084 | 0.763535 | 0.822138 | 38.48813 | 34.48694 | 32.00364 | 31.24978 | 29.94755 | 34.1693  |
| 16849 | NEK7      | 3049.103 | -0.1312  | 0.086565 | -1.51558 | 0.129625 | 0.204527 | 3188.552 | 3179.915 | 3193.407 | 2868.283 | 2986.198 | 2878.261 |
| 22575 | LOC11962  | 367.4108 | -0.13131 | 0.208672 | -0.62925 | 0.529186 | 0.623186 | 459.1472 | 317.4989 | 372.912  | 312.4978 | 444.935  | 297.4739 |
| 25615 | LOC10322  | 9.947294 | -0.13147 | 0.886287 | -0.14834 | 0.882075 | 0.915478 | 13.01007 | 3.831883 | 13.91463 | 8.928508 | 14.97377 | 5.024897 |
| 21405 | LOC10322  | 1045.501 | -0.13153 | 0.161256 | -0.81566 | 0.414692 | 0.514935 | 894.9846 | 1357.581 | 1024.117 | 1022.314 | 1052.442 | 921.5662 |
| 17576 | PCNT      | 6211.691 | -0.13166 | 0.093764 | -1.4042  | 0.160259 | 0.242403 | 6551.656 | 6690.467 | 6250.451 | 5718.709 | 5628     | 6430.864 |
| 25742 | LOC11962  | 8.398475 | -0.13172 | 1.02442  | -0.12858 | 0.897694 | 0.927091 | 12.46799 | 4.379295 | 9.044508 | 2.232127 | 19.252   | 3.014938 |
| 24177 | LOC10321  | 76.8664  | -0.13175 | 0.348505 | -0.37805 | 0.705396 | 0.775653 | 66.67662 | 109.4824 | 64.00729 | 64.73168 | 91.98176 | 64.31869 |
| 20228 | ZNF839    | 561.6433 | -0.13175 | 0.132938 | -0.99108 | 0.321645 | 0.422728 | 620.6889 | 591.2048 | 549.6278 | 540.1747 | 530.4994 | 537.664  |
| 21766 | WDR27     | 598.3876 | -0.13175 | 0.172091 | -0.7656  | 0.443913 | 0.542196 | 748.6213 | 502.524  | 623.3753 | 575.8888 | 620.3421 | 519.5744 |
| 18310 | MRPL33    | 4348.997 | -0.13184 | 0.102938 | -1.28074 | 0.200286 | 0.290803 | 4431.556 | 4311.415 | 4893.774 | 4216.488 | 4442.933 | 3797.817 |
| 22050 | B4GAT1    | 939.6217 | -0.13204 | 0.18438  | -0.71614 | 0.473907 | 0.571349 | 1123.745 | 730.7948 | 1098.56  | 783.4766 | 827.8358 | 1073.318 |
| 18312 | NDUFA9    | 3669.613 | -0.13216 | 0.103205 | -1.28051 | 0.200365 | 0.290892 | 4045.591 | 3474.423 | 3997.672 | 3462.029 | 3330.595 | 3707.369 |
| 20284 | EHBP1     | 1900.828 | -0.13216 | 0.134721 | -0.98101 | 0.326589 | 0.428041 | 1834.962 | 2369.198 | 1762.288 | 1747.755 | 1739.097 | 1951.67  |
| 23174 | LOC11962  | 133.8379 | -0.13228 | 0.247895 | -0.53362 | 0.593604 | 0.680936 | 144.195  | 125.9047 | 152.3652 | 124.9991 | 104.8164 | 150.7469 |
| 23893 | CUNH17or  | 101.2035 | -0.13231 | 0.312186 | -0.42383 | 0.671688 | 0.747351 | 94.32303 | 108.3875 | 115.4914 | 58.0353  | 130.4858 | 100.4979 |
| 20693 | SPATA2    | 487.6126 | -0.13236 | 0.143373 | -0.9232  | 0.355902 | 0.457219 | 470.531  | 545.7696 | 514.1455 | 484.3716 | 438.5177 | 472.3404 |
| 19085 | CCM2      | 2010.896 | -0.13262 | 0.113167 | -1.17186 | 0.241253 | 0.33606  | 2206.834 | 1992.579 | 2117.806 | 1866.058 | 1745.514 | 2136.586 |
| 25772 | LOC11962  | 5.554408 | -0.13263 | 1.069303 | -0.12403 | 0.901288 | 0.92972  | 7.047123 | 7.116354 | 3.478657 | 2.232127 | 6.417332 | 7.034856 |
| 25538 | LOC11962  | 9.982737 | -0.13277 | 0.831139 | -0.15974 | 0.873084 | 0.908879 | 10.29964 | 6.568942 | 13.91463 | 13.39276 | 10.69555 | 5.024897 |
| 21425 | COQ3      | 551.3627 | -0.13279 | 0.163049 | -0.81444 | 0.415394 | 0.515437 | 650.5036 | 472.9638 | 608.7649 | 482.1394 | 539.0559 | 554.7487 |
| 21439 | KLHL13    | 455.2644 | -0.13293 | 0.163534 | -0.81286 | 0.416298 | 0.516222 | 462.9418 | 523.8731 | 446.6595 | 410.7114 | 382.9008 | 504.4997 |
| 24989 | LOC11961  | 25.2531  | -0.13296 | 0.537632 | -0.2473  | 0.804676 | 0.856069 | 28.18849 | 27.918   | 22.2634  | 37.94616 | 17.11289 | 18.08963 |
| 19791 | GCSH      | 1384.33  | -0.13296 | 0.126084 | -1.05453 | 0.291639 | 0.391755 | 1324.859 | 1639.498 | 1376.852 | 1281.241 | 1435.343 | 1248.185 |
| 18924 | SPTSSA    | 1491.975 | -0.13303 | 0.110899 | -1.19953 | 0.230322 | 0.323564 | 1519.468 | 1501.551 | 1661.407 | 1321.419 | 1538.021 | 1409.986 |
| 20088 | CUNH19or  | 814.511  | -0.13325 | 0.131323 | -1.01466 | 0.310268 | 0.410617 | 948.6511 | 811.2643 | 799.3953 | 752.2268 | 744.4105 | 831.118  |
| 23254 | NME3      | 551.5658 | -0.13331 | 0.255592 | -0.52158 | 0.601965 | 0.688193 | 685.1972 | 312.0247 | 733.9966 | 582.5851 | 477.0217 | 518.5694 |
| 24457 | LOC10321  | 46.9208  | -0.1338  | 0.397046 | -0.33699 | 0.736123 | 0.800173 | 40.11439 | 54.19377 | 52.87558 | 58.0353  | 32.08666 | 44.2191  |
| 28891 | LOC10321  | 0.490642 | -0.1338  | 3.624594 | -0.03692 | 0.970552 | NA       | 0        | 0.547412 | 1.391463 | 0        | 0        | 1.004979 |
| 20002 | ERCC1     | 1487.512 | -0.13397 | 0.130117 | -1.03957 | 0.303211 | 0.403008 | 1698.899 | 1326.926 | 1647.492 | 1424.097 | 1309.136 | 1518.524 |
| 25726 | BRINP2    | 5.883776 | -0.13397 | 1.024606 | -0.12075 | 0.895969 | 0.925886 | 4.336691 | 7.663765 | 6.261582 | 4.464254 | 8.556443 | 4.019918 |
| 25730 | PLA2G1B   | 5.567806 | -0.13401 | 1.030645 | -0.13003 | 0.896546 | 0.926338 | 5.420864 | 7.116354 | 4.87012  | 6.696381 | 4.278221 | 5.024897 |
| 19543 | LOC10322  | 3284.687 | -0.13416 | 0.122906 | -1.09154 | 0.275035 | 0.374139 | 3067.667 | 3981.874 | 3257.414 | 3218.727 | 3309.204 | 2873.236 |
| 17539 | BBS9      | 1822.523 | -0.13427 | 0.095216 | -1.41018 | 0.158487 | 0.240229 | 1937.417 | 1935.648 | 1849.95  | 1727.666 | 1717.706 | 1766.754 |
| 23952 | XKR8      | 66.05691 | -0.13434 | 0.323935 | -0.41472 | 0.678347 | 0.752917 | 65.59245 | 77.73248 | 63.31155 | 73.66019 | 57.75599 | 58.28881 |
| 25205 | LOC11961  | 16.28374 | -0.13441 | 0.627195 | -0.21431 | 0.830307 | 0.875767 | 16.26259 | 19.70683 | 14.61036 | 20.08914 | 14.97377 | 12.05975 |
| 17976 | ELOC      | 2322.436 | -0.13444 | 0.099757 | -1.34764 | 0.177775 | 0.262915 | 2322.298 | 2411.896 | 2552.638 | 2287.93  | 2284.57  | 2075.283 |
| 20481 | RPAP3     | 2876.506 | -0.13447 | 0.141543 | -0.95003 | 0.342098 | 0.444055 | 2634.54  | 3748.676 | 2648.649 | 2720.963 | 2695.279 | 2810.928 |
| 19304 | GTF2F1    | 4701.663 | -0.13458 | 0.118592 | -1.13483 | 0.256448 | 0.353173 | 4527.505 | 5773.552 | 4461.725 | 4571.396 | 4308.169 | 4567.632 |
| 19781 | HDDC3     | 670.5881 | -0.13465 | 0.12749  | -1.05615 | 0.2909   | 0.390958 | 692.7864 | 688.0967 | 728.4307 | 636.1562 | 594.6728 | 683.386  |
| 20806 | HDAC7     | 2024.127 | -0.13473 | 0.149146 | -0.90335 | 0.36634  | 0.468083 | 2294.652 | 1784.015 | 2284.086 | 1892.844 | 1612.889 | 2276.278 |
| 19882 | DCAF4     | 825.5176 | -0.13473 | 0.128612 | -1.0476  | 0.294825 | 0.395012 | 858.1227 | 933.8846 | 802.874  | 716.5128 | 808.5838 | 833.128  |
| 24837 | LOC11962  | 34.97828 | -0.13474 | 0.489513 | -0.27526 | 0.783118 | 0.838233 | 43.909   | 23.53871 | 43.83108 | 24.5534  | 27.80844 | 46.22906 |
| 16700 | PPP2CA    | 7249.13  | -0.13491 | 0.087447 | -1.54278 | 0.122885 | 0.19561  | 7643.96  | 7593.149 | 7534.075 | 6555.757 | 6785.259 | 7382.579 |
| 25604 | LOC10322  | 9.002282 | -0.13498 | 0.898355 | -0.15026 | 0.880561 | 0.914299 | 9.757555 | 4.379295 | 14.61036 | 8.928508 | 4.278221 | 12.05975 |
| 19656 | CTNBNB1   | 1915.14  | -0.13513 | 0.125432 | -1.07727 | 0.281358 | 0.380541 | 1924.407 | 2        |          |          |          |          |



|       |           |          |          |          |          |          |          |          |          |          |          |          |          |
|-------|-----------|----------|----------|----------|----------|----------|----------|----------|----------|----------|----------|----------|----------|
| 18418 | SNRPB2    | 3291.486 | -0.13548 | 0.10737  | -1.26181 | 0.207017 | 0.298813 | 3148.438 | 3838.452 | 3347.859 | 3131.674 | 3268.561 | 3013.933 |
| 20350 | LOC103214 | 794.4319 | -0.13553 | 0.139855 | -0.9691  | 0.332496 | 0.434369 | 929.136  | 717.1095 | 846.7051 | 765.6196 | 791.4709 | 716.5504 |
| 19056 | RING1     | 3014.628 | -0.13559 | 0.115281 | -1.17618 | 0.239523 | 0.334158 | 2912.63  | 3629.888 | 2927.638 | 2866.051 | 2780.844 | 2970.719 |
| 18563 | ARHGAP1C  | 1460.73  | -0.13562 | 0.109271 | -1.24111 | 0.214566 | 0.307291 | 1503.748 | 1592.421 | 1497.91  | 1308.026 | 1349.779 | 1512.494 |
| 25045 | LOC103236 | 25.22963 | -0.1358  | 0.569876 | -0.2383  | 0.811648 | 0.861555 | 36.86187 | 24.63353 | 16.69755 | 35.71403 | 21.39111 | 16.07967 |
| 21108 | AP4B1     | 572.7123 | -0.13586 | 0.157253 | -0.86396 | 0.38761  | 0.488166 | 681.4026 | 522.2309 | 599.0247 | 533.4783 | 494.1346 | 606.0026 |
| 25132 | LOC119621 | 21.68208 | -0.13598 | 0.601378 | -0.22611 | 0.821119 | 0.868592 | 23.8518  | 24.63353 | 18.78475 | 13.39276 | 36.36488 | 13.06473 |
| 19076 | SDHAF2    | 1745.001 | -0.13603 | 0.115907 | -1.17359 | 0.240558 | 0.33525  | 1857.188 | 1638.951 | 1989.792 | 1662.935 | 1559.412 | 1761.729 |
| 23120 | LOC103245 | 137.7159 | -0.13605 | 0.251805 | -0.54031 | 0.588986 | 0.67725  | 132.2691 | 156.5598 | 143.3207 | 102.6778 | 166.8506 | 124.6175 |
| 19474 | RFX3      | 1553.914 | -0.13628 | 0.123389 | -1.10445 | 0.269396 | 0.367739 | 1533.02  | 1871.601 | 1478.429 | 1453.115 | 1456.734 | 1530.584 |
| 19043 | CUNH17or  | 1066.136 | -0.13654 | 0.115922 | -1.17786 | 0.238854 | 0.333453 | 1068.452 | 1196.642 | 1087.428 | 953.1182 | 1028.912 | 1062.263 |
| 16442 | GAPDH     | 83165.59 | -0.13654 | 0.086333 | -1.58154 | 0.113754 | 0.183928 | 85986.28 | 88294.24 | 87022.78 | 77675.79 | 74530.89 | 85483.55 |
| 23090 | LOC119621 | 383.164  | -0.13662 | 0.249711 | -0.54711 | 0.584304 | 0.672747 | 290.5583 | 594.4892 | 317.9492 | 379.4616 | 365.7879 | 350.7378 |
| 21631 | SLC4A5    | 378.9326 | -0.13681 | 0.174339 | -0.78471 | 0.432621 | 0.531702 | 356.1507 | 469.1319 | 366.6504 | 366.0688 | 333.7013 | 381.8922 |
| 18404 | ASF1A     | 1125.411 | -0.13683 | 0.108257 | -1.26393 | 0.206255 | 0.297908 | 1156.812 | 1204.853 | 1170.916 | 1124.992 | 1073.834 | 1021.059 |
| 18793 | RANBP9    | 3088.696 | -0.13694 | 0.11232  | -1.21915 | 0.222786 | 0.315158 | 2997.196 | 3701.051 | 3006.951 | 2903.997 | 2973.364 | 2949.615 |
| 21224 | MDM1      | 766.3577 | -0.13696 | 0.161585 | -0.84764 | 0.396641 | 0.496806 | 683.5709 | 981.5094 | 741.6496 | 694.1915 | 795.7492 | 701.4757 |
| 16580 | MKLN1     | 9155.673 | -0.13706 | 0.08783  | -1.5605  | 0.118641 | 0.190233 | 9661.063 | 10127.67 | 8983.979 | 8479.85  | 8753.241 | 8928.238 |
| 17798 | RUSF1     | 2206.698 | -0.13706 | 0.099608 | -1.37599 | 0.168824 | 0.252436 | 2366.749 | 2295.845 | 2275.737 | 2154.003 | 1935.895 | 2211.96  |
| 20919 | PHF3      | 9351.984 | -0.13733 | 0.154583 | -0.8884  | 0.374323 | 0.475701 | 8291.753 | 12853.78 | 8245.112 | 8814.669 | 8753.241 | 9153.353 |
| 19347 | CDC123    | 2761.562 | -0.13736 | 0.121817 | -1.12755 | 0.259509 | 0.356604 | 2715.853 | 3385.742 | 2575.598 | 2602.66  | 2701.697 | 2587.822 |
| 19975 | VARS2     | 5382.507 | -0.13744 | 0.132949 | -1.03377 | 0.301243 | 0.400916 | 6295.791 | 4698.436 | 5928.327 | 5008.893 | 4564.862 | 5798.732 |
| 18745 | CMTM3     | 2884.633 | -0.13745 | 0.1122   | -1.22504 | 0.220559 | 0.312807 | 3169.037 | 2845.994 | 3059.131 | 2660.695 | 2485.647 | 3087.297 |
| 18409 | AK1       | 1204.246 | -0.13752 | 0.10881  | -1.26382 | 0.206295 | 0.297927 | 1226.741 | 1332.4   | 1225.879 | 1187.492 | 1095.225 | 1157.736 |
| 22380 | NUDT8     | 388.5483 | -0.13768 | 0.208198 | -0.6613  | 0.508421 | 0.603949 | 462.9418 | 302.1713 | 459.8784 | 319.1942 | 352.9533 | 434.1511 |
| 18267 | LOC103231 | 8440.787 | -0.13795 | 0.106918 | -1.29023 | 0.19697  | 0.286662 | 8291.753 | 10032.96 | 8211.022 | 7754.409 | 7865.51  | 8489.062 |
| 23462 | LOC119621 | 94.16839 | -0.13801 | 0.281187 | -0.49081 | 0.623563 | 0.706561 | 102.9964 | 100.1764 | 93.228   | 69.19594 | 106.9555 | 92.45811 |
| 19087 | FUT8      | 759.2659 | -0.13803 | 0.117818 | -1.17155 | 0.241378 | 0.3362   | 795.7828 | 805.7902 | 782.6978 | 743.2983 | 731.5758 | 696.4508 |
| 20683 | PNPLA6    | 2241.522 | -0.13803 | 0.149352 | -0.92421 | 0.355374 | 0.456782 | 2611.772 | 1913.752 | 2526.896 | 2073.646 | 1841.774 | 2481.294 |
| 21910 | TSPYL2    | 1380.427 | -0.13806 | 0.18581  | -0.74304 | 0.457457 | 0.555066 | 1135.671 | 1984.368 | 1218.921 | 1292.402 | 1332.666 | 1318.533 |
| 25432 | LOC119618 | 10.3325  | -0.13817 | 0.786571 | -0.17567 | 0.860557 | 0.899571 | 11.38381 | 8.758589 | 11.82743 | 11.16063 | 12.83466 | 6.029877 |
| 16868 | SLC25A37  | 5547.098 | -0.13832 | 0.091502 | -1.51163 | 0.130629 | 0.205867 | 5780.267 | 6163.857 | 5498.365 | 5098.178 | 5221.569 | 5520.352 |
| 18109 | EIF2A     | 4681.559 | -0.1384  | 0.104879 | -1.3196  | 0.186969 | 0.274481 | 4622.913 | 5499.846 | 4591.827 | 4444.165 | 4633.314 | 4297.292 |
| 20156 | CFAP298   | 1367.317 | -0.13855 | 0.13824  | -1.00221 | 0.31624  | 0.417109 | 1340.58  | 1702.998 | 1257.187 | 1290.169 | 1322.128 | 1380.842 |
| 24447 | LOC119621 | 39.86006 | -0.13855 | 0.410035 | -0.3379  | 0.735441 | 0.799759 | 44.45108 | 35.03436 | 46.614   | 33.4819  | 36.36488 | 43.21412 |
| 24479 | LOC103231 | 43.58036 | -0.13858 | 0.415444 | -0.33357 | 0.738701 | 0.802219 | 42.28274 | 33.93953 | 61.22436 | 40.17829 | 40.6431  | 43.21412 |
| 18255 | MFS14B    | 4460.728 | -0.13867 | 0.107304 | -1.29234 | 0.19624  | 0.285771 | 5045.74  | 4257.769 | 4727.495 | 4207.559 | 3920.99  | 4604.816 |
| 19959 | PYM1      | 1065.606 | -0.13877 | 0.133915 | -1.03624 | 0.300092 | 0.399717 | 1041.348 | 1278.207 | 1028.291 | 1109.367 | 962.5998 | 973.8251 |
| 19205 | LOC119618 | 1782.739 | -0.13877 | 0.120454 | -1.15207 | 0.249293 | 0.34509  | 1938.501 | 1784.015 | 1890.302 | 1678.559 | 1484.543 | 1920.516 |
| 18205 | PHF6      | 5782.372 | -0.13884 | 0.106754 | -1.30055 | 0.193412 | 0.282442 | 5723.348 | 6886.441 | 5572.113 | 5537.907 | 5360.611 | 5613.815 |
| 19262 | CCHCR1    | 1247.128 | -0.13899 | 0.12164  | -1.14268 | 0.253173 | 0.349424 | 1369.852 | 1231.677 | 1325.368 | 1203.116 | 1050.303 | 1302.453 |
| 17550 | ATE1      | 2831.005 | -0.13911 | 0.098827 | -1.40759 | 0.159254 | 0.24124  | 3017.253 | 2982.3   | 2910.244 | 2549.089 | 2592.602 | 2934.54  |
| 15923 | TRPM7     | 5509.456 | -0.13916 | 0.082804 | -1.68055 | 0.09285  | 0.155022 | 5947.23  | 5727.57  | 5650.034 | 5136.124 | 5347.777 | 5248.003 |
| 19041 | ZMYM4     | 5852.133 | -0.13923 | 0.118182 | -1.1781  | 0.238756 | 0.333351 | 5665.887 | 7228.026 | 5509.497 | 5546.836 | 5480.402 | 5682.154 |
| 17852 | CFMEM43   | 4948.518 | -0.13935 | 0.101796 | -1.3689  | 0.171032 | 0.254701 | 5355.271 | 5095.309 | 5119.191 | 4703.092 | 4237.578 | 5180.669 |
| 25339 | LOC119621 | 12.75206 | -0.13937 | 0.723192 | -0.19271 | 0.847184 | 0.888842 | 14.63633 | 13.6853  | 12.52316 | 11.16063 | 6.417332 | 18.08963 |
| 18045 | UBXN4     | 7653.663 | -0.13938 | 0.104386 | -1.33524 | 0.181798 | 0.267837 | 7659.68  | 9062.95  | 7346.923 | 7053.521 | 7433.41  | 7365.495 |
| 20375 | SPATA5L1  | 486.2316 | -0.13946 | 0.144437 | -0.96554 | 0.334276 | 0.436159 | 536.1234 | 498.6922 | 497.4479 | 466.5145 | 417.1266 | 501.4848 |
| 25510 | LOC103225 | 15.19179 | -0.1395  | 0.858024 | -0.16258 | 0.870848 | 0.907376 | 7.047123 | 34.48694 | 5.565851 | 15.62489 | 21.39111 | 7.034856 |
| 19922 | LOC103225 | 763.5249 | -0.13953 | 0.133678 | -1.04381 | 0.296572 | 0.395762 | 838.0655 | 833.7082 | 733.9966 | 669.6381 | 703.7674 | 801.9736 |
| 21182 | LOC103236 | 341.8669 | -0.13983 | 0.163911 | -0.85311 | 0.393597 | 0.493994 | 335.0094 | 397.421  | 342.9956 | 308.0335 | 340.1186 | 327.6233 |
| 17582 | SREBF2    | 11283.23 | -0.13992 | 0.099725 | -1.40302 | 0.160611 | 0.242854 | 11980.11 | 12084.12 | 11435.04 | 10383.85 | 9839.909 | 11976.34 |
| 20147 | STXBP4    | 563.2375 | -0.14009 | 0.13952  | -1.00408 | 0.315342 | 0.41611  | 567.0223 | 641.0192 | 562.8467 | 502.2286 | 579.699  | 526.6092 |
| 18006 | TOM1L1    | 3027.308 | -0.14023 | 0.104515 | -1.34169 | 0.179695 | 0.265311 | 3004.785 | 3513.836 | 3000.689 | 2966.497 | 2911.33  | 2766.708 |
| 18974 | STAU2     | 4586.161 | -0.14023 | 0.117899 | -1.18944 | 0.234268 | 0.32824  | 4476.549 | 5630.131 | 4319.1   | 4256.666 | 4489.993 | 4344.526 |
| 21883 | CABYR     | 569.5294 | -0.14035 | 0.1879   | -0.74696 | 0.455087 | 0.552872 | 515.5241 | 774.5877 | 500.9266 | 502.2286 | 588.2554 | 535.6541 |
| 22202 | KIF25     | 285.1541 | -0.1404  | 0.202989 | -0.69168 | 0.489138 | 0.585699 | 328.5043 | 235.9345 | 335.3425 | 245.534  | 263.1106 | 302.4988 |
| 16331 | DAP3      | 3612.416 | -0.14044 | 0.087804 | -1.59952 | 0.109704 | 0.178592 | 3815.746 | 3837.904 | 3715.206 | 3386.137 | 3332.734 | 3586.772 |
| 23800 | LOC103216 | 73.96968 | -0.1405  | 0.321668 | -0.43679 | 0.662261 | 0.739756 | 80.22878 | 91.41777 | 61.92009 | 60.26743 | 70.59065 | 79.39338 |
| 20850 | ALG12     | 1035.486 | -0.14053 | 0.156426 | -0.89838 | 0.368981 | 0.470473 | 1222.405 | 884.0701 | 1155.61  | 988.8323 | 853.5052 | 1108.492 |
| 21564 | C1GALT1C1 | 308.2769 | -0.14061 | 0.17696  | -0.79457 | 0.426865 | 0.526246 | 343.1407 | 280.2748 | 345.0828 | 321.4263 | 282.3626 | 277.3743 |
| 18833 | MPI       | 1749.15  | -0.14062 | 0.115857 | -1.2137  | 0.224863 | 0.31742  | 1912.481 | 1793.869 | 1804.031 | 1629.453 | 1488.821 | 1866.247 |
| 24094 | FBXO48    | 57.14363 | -0.14074 | 0.359549 | -0.39145 | 0.695466 | 0.767368 | 53.12446 | 53.64636 | 73.74753 | 60.26743 | 42.78221 | 59.29379 |
| 16866 | CLK1      | 2964.184 | -0.1409  | 0.093172 | -1.51227 | 0.130466 | 0.205646 | 2987.98  | 3263.669 | 3070.958 | 2850.426 | 2900.634 | 2711.435 |
| 23184 | LOC103231 | 136.793  | -0.14092 | 0.264651 | -0.53248 | 0.594394 | 0.681589 | 142.0266 | 134.1159 | 153.0609 | 100.4457 | 177.5462 | 113.5627 |
| 18784 | ANKRD27   | 2520.397 | -0.14124 | 0.115743 | -1.22027 | 0.222362 | 0.314708 | 2799.876 | 2397.116 | 2741.182 | 2332.573 | 2190.449 | 2661.186 |
| 19712 | LOC103233 | 2151.163 | -0.14127 | 0.132348 | -1.06739 | 0.285798 | 0.385445 | 2058.844 | 2666.99  | 2044.754 | 1857.13  | 2164.78  | 2114.477 |
| 21307 | LOC103246 | 322.2797 | -0.14132 | 0.16988  | -0.83189 | 0.405472 | 0.505913 | 301.4    | 373.3349 | 340.9084 | 299.105  | 297.3364 | 321.5934 |
| 17246 | LMAN2     | 8259.795 | -0.14134 | 0.096918 | -1.45834 | 0.144746 | 0.223128 | 9314.128 | 7831.821 | 8849.007 | 7881.64  | 7598.121 | 8084.055 |
| 21317 | LOC103226 | 343.6971 | -0.14136 | 0.170202 | -0.83052 | 0.406245 | 0.50664  | 346.3932 | 399.6106 | 333.2553 | 312.4978 | 367.927  | 302.4988 |
| 24538 | LOC119621 | 36.49884 |          |          |          |          |          |          |          |          |          |          |          |



|       |           |          |          |          |          |          |          |          |          |          |          |          |          |
|-------|-----------|----------|----------|----------|----------|----------|----------|----------|----------|----------|----------|----------|----------|
| 19639 | SEPHS2    | 1036.472 | -0.14162 | 0.131195 | -1.07947 | 0.280379 | 0.379545 | 1027.796 | 1144.091 | 1096.473 | 850.4404 | 992.5473 | 1107.487 |
| 19751 | LOC103232 | 1936.292 | -0.14165 | 0.133606 | -1.06022 | 0.289042 | 0.389053 | 1793.764 | 2431.603 | 1869.43  | 1754.452 | 1878.139 | 1890.366 |
| 19953 | GATAD2B   | 1458.31  | -0.14175 | 0.136664 | -1.03723 | 0.299628 | 0.399219 | 1348.711 | 1826.713 | 1412.335 | 1439.722 | 1379.726 | 1342.653 |
| 17569 | NUDT3     | 6183.624 | -0.14196 | 0.10105  | -1.40486 | 0.160062 | 0.24219  | 6175.99  | 7242.258 | 6045.906 | 5888.351 | 5726.399 | 6022.842 |
| 23595 | SSC4D     | 93.53364 | -0.14204 | 0.302922 | -0.4689  | 0.639143 | 0.720136 | 110.0435 | 92.5126  | 89.74935 | 120.5349 | 77.00798 | 71.35354 |
| 19362 | CEP295    | 5250.575 | -0.14216 | 0.126303 | -1.12555 | 0.260355 | 0.357484 | 4977.437 | 6616.019 | 4935.518 | 4937.465 | 4815.138 | 5221.873 |
| 22636 | LOC103242 | 167.0145 | -0.14225 | 0.230167 | -0.61802 | 0.536562 | 0.630168 | 194.0669 | 152.1805 | 178.1072 | 191.9629 | 139.0422 | 146.727  |
| 23198 | LOC103242 | 145.3737 | -0.14238 | 0.268749 | -0.52977 | 0.596268 | 0.683306 | 143.1108 | 200.3527 | 113.4042 | 138.3919 | 143.3204 | 133.6623 |
| 21369 | GHDC      | 342.2464 | -0.14246 | 0.173425 | -0.82146 | 0.411383 | 0.511798 | 388.1338 | 319.1411 | 373.6077 | 314.7299 | 293.0582 | 364.8075 |
| 16341 | TRAPPC8   | 3954.856 | -0.14249 | 0.089217 | -1.59707 | 0.11025  | 0.179364 | 4107.931 | 4300.467 | 4046.374 | 3691.938 | 3642.905 | 3939.52  |
| 23121 | SPAG7     | 260.6814 | -0.14253 | 0.2638   | -0.54028 | 0.589005 | 0.67725  | 239.6022 | 389.7572 | 189.9347 | 290.1765 | 222.4675 | 232.1503 |
| 24395 | LOC103215 | 42.20868 | -0.14267 | 0.410611 | -0.34746 | 0.728249 | 0.793625 | 42.28274 | 43.79295 | 45.91827 | 33.4819  | 55.61688 | 32.15934 |
| 18098 | SLC30A4   | 1497.602 | -0.14269 | 0.107988 | -1.32133 | 0.186391 | 0.273799 | 1575.303 | 1620.886 | 1523.652 | 1419.633 | 1315.553 | 1530.584 |
| 18869 | COA1      | 2288.722 | -0.14269 | 0.118031 | -1.20893 | 0.226688 | 0.319387 | 2577.621 | 2057.174 | 2569.336 | 2252.216 | 2160.502 | 2115.482 |
| 17983 | ZNF12     | 2839.412 | -0.14291 | 0.106164 | -1.34616 | 0.178252 | 0.263517 | 2889.32  | 3281.186 | 2773.185 | 2595.964 | 2639.663 | 2857.157 |
| 21552 | LOC103233 | 355.9432 | -0.14292 | 0.179496 | -0.79626 | 0.425883 | 0.525338 | 341.5144 | 417.1278 | 361.0846 | 290.1765 | 402.1528 | 323.6034 |
| 17113 | HEATR3    | 2253.571 | -0.14306 | 0.096723 | -1.4791  | 0.139115 | 0.216114 | 2431.257 | 2368.651 | 2300.088 | 2138.378 | 2027.877 | 2255.174 |
| 19319 | RPS6KA1   | 1447.805 | -0.14309 | 0.126418 | -1.13191 | 0.257672 | 0.354585 | 1674.505 | 1365.792 | 1524.347 | 1283.473 | 1309.136 | 1529.579 |
| 18334 | RABEPK    | 1149.171 | -0.14321 | 0.11209  | -1.27768 | 0.201364 | 0.291985 | 1246.799 | 1165.987 | 1209.181 | 1113.831 | 1007.521 | 1151.706 |
| 25390 | LOC103242 | 12.95291 | -0.14322 | 0.7827   | -0.18298 | 0.854815 | 0.895012 | 11.9259  | 21.89647 | 6.261582 | 15.62489 | 14.97377 | 7.034856 |
| 22477 | LOC103222 | 169.2757 | -0.14322 | 0.223086 | -0.64199 | 0.520878 | 0.616051 | 208.1612 | 164.771  | 158.6268 | 169.6417 | 164.7115 | 149.7419 |
| 24798 | CHRM3     | 36.7225  | -0.14329 | 0.509153 | -0.28144 | 0.778375 | 0.834466 | 31.9831  | 39.41365 | 42.43961 | 37.94616 | 53.47777 | 15.07469 |
| 19144 | CYFNS1    | 12710.49 | -0.1435  | 0.123479 | -1.16211 | 0.245191 | 0.340493 | 11809.89 | 15961.43 | 12257.4  | 12035.63 | 11463.49 | 12735.1  |
| 19072 | SPDEF2    | 1151.064 | -0.14367 | 0.122355 | -1.17424 | 0.240299 | 0.33496  | 1156.27  | 1346.633 | 1124.302 | 1100.439 | 1031.051 | 1147.687 |
| 17840 | BABAM1    | 2228.441 | -0.14369 | 0.104885 | -1.36999 | 0.170691 | 0.254363 | 2193.281 | 2573.93  | 2249.3   | 2138.378 | 2128.415 | 2087.342 |
| 19624 | DHX37     | 1771.088 | -0.14371 | 0.13287  | -1.08162 | 0.279423 | 0.37852  | 2116.305 | 1587.494 | 1878.475 | 1642.845 | 1557.273 | 1844.137 |
| 16116 | PTCD3     | 6804.401 | -0.14373 | 0.087488 | -1.64286 | 0.100411 | 0.165643 | 7415.199 | 6676.234 | 7339.966 | 6403.972 | 6419.471 | 6571.561 |
| 18227 | NAA35     | 2350.917 | -0.14387 | 0.110978 | -1.29635 | 0.194855 | 0.284206 | 2456.735 | 2717.352 | 2231.906 | 2098.199 | 2288.848 | 2312.458 |
| 18625 | EVC       | 1634.286 | -0.14397 | 0.116692 | -1.23373 | 0.217302 | 0.309867 | 1716.788 | 1685.481 | 1753.243 | 1495.525 | 1398.978 | 1755.699 |
| 17903 | VPS45     | 1213.767 | -0.14398 | 0.105795 | -1.36091 | 0.173541 | 0.257699 | 1312.933 | 1298.461 | 1211.964 | 1140.617 | 1150.842 | 1167.786 |
| 19547 | LOC103233 | 781.7041 | -0.1441  | 0.132067 | -1.09112 | 0.275219 | 0.374313 | 891.7321 | 797.0316 | 775.7405 | 662.9417 | 782.9145 | 779.8641 |
| 15307 | KDELRL2   | 16984.25 | -0.14424 | 0.081108 | -1.77841 | 0.075336 | 0.130843 | 18219.52 | 17659.51 | 17624.96 | 15868.19 | 15598.39 | 16934.91 |
| 22752 | ATPSCKMT  | 133.8055 | -0.14428 | 0.240244 | -0.60055 | 0.548137 | 0.640481 | 140.9425 | 140.1374 | 137.7548 | 136.1597 | 143.3204 | 104.5179 |
| 20710 | ARHGAP17  | 609.4137 | -0.14428 | 0.157103 | -0.91838 | 0.358421 | 0.460097 | 552.9281 | 749.9542 | 617.1137 | 531.2462 | 610.3421 | 584.8981 |
| 25464 | LOC119622 | 9.668701 | -0.14431 | 0.849282 | -0.16992 | 0.865072 | 0.903156 | 10.29964 | 8.758589 | 11.82743 | 2.232127 | 12.83466 | 12.05975 |
| 19389 | AMMECR1   | 1654.406 | -0.14435 | 0.128978 | -1.11919 | 0.263061 | 0.360693 | 1611.623 | 2032.54  | 1566.091 | 1506.686 | 1657.811 | 1551.688 |
| 19003 | CUNH20or  | 1538.572 | -0.14447 | 0.121997 | -1.18421 | 0.236329 | 0.330624 | 1810.568 | 1497.719 | 1543.132 | 1379.454 | 1409.674 | 1590.883 |
| 16727 | USP40     | 3424.971 | -0.14448 | 0.09396  | -1.53772 | 0.124117 | 0.197265 | 3566.928 | 3784.258 | 3442.479 | 3171.852 | 3157.327 | 3426.98  |
| 25359 | LOC119622 | 11.49604 | -0.14453 | 0.765188 | -0.18888 | 0.850186 | 0.891289 | 8.131296 | 18.06459 | 9.740239 | 11.16063 | 12.83466 | 9.044815 |
| 16992 | CUL5      | 5649.907 | -0.14453 | 0.096767 | -1.49359 | 0.135283 | 0.211658 | 5876.758 | 6472.597 | 5448.968 | 5267.842 | 5403.394 | 5429.904 |
| 20081 | TRIR      | 2677.814 | -0.14469 | 0.142491 | -1.01542 | 0.309904 | 0.410279 | 2441.015 | 3501.793 | 2492.11  | 2499.982 | 2622.55  | 2509.434 |
| 18203 | APOOL     | 991.5354 | -0.14476 | 0.111286 | -1.30081 | 0.193324 | 0.282344 | 1004.486 | 1081.686 | 1035.248 | 966.511  | 949.7651 | 911.5164 |
| 19458 | RNF20     | 3710.023 | -0.14481 | 0.130621 | -1.10864 | 0.267586 | 0.365597 | 3636.857 | 4619.061 | 3436.217 | 3475.422 | 3236.474 | 3856.106 |
| 21141 | LOC103242 | 333.543  | -0.14491 | 0.168595 | -0.85949 | 0.390072 | 0.490518 | 350.7299 | 347.0591 | 356.2145 | 328.1227 | 267.3888 | 351.7428 |
| 19782 | MRPL36    | 1725.359 | -0.14509 | 0.137381 | -1.05612 | 0.290913 | 0.390958 | 1881.04  | 1499.908 | 2052.408 | 1629.453 | 1781.879 | 1507.469 |
| 18920 | NDUFV3    | 1579.716 | -0.1451  | 0.12094  | -1.19978 | 0.230224 | 0.323477 | 1561.751 | 1855.179 | 1561.917 | 1578.114 | 1362.613 | 1558.723 |
| 26045 | LOC119622 | 1.869781 | -0.14513 | 1.82969  | -0.07932 | 0.93678  | 0.956202 | 2.168345 | 2.189647 | 1.391463 | 4.464254 | 0        | 1.004979 |
| 20965 | RSP03     | 7987.858 | -0.14523 | 0.164345 | -0.88366 | 0.376878 | 0.477906 | 6926.78  | 11253.14 | 6990.013 | 7377.18  | 7354.262 | 8025.766 |
| 25201 | LOC103233 | 13.7528  | -0.14534 | 0.677187 | -0.21463 | 0.830056 | 0.875641 | 17.88885 | 12.59047 | 12.52316 | 15.62489 | 12.83466 | 11.05477 |
| 19019 | REX1BD    | 1029.797 | -0.14543 | 0.123109 | -1.18133 | 0.23747  | 0.331938 | 1059.779 | 1185.147 | 1001.157 | 1017.85  | 904.8438 | 1010.004 |
| 25252 | LOC103218 | 16.76296 | -0.14549 | 0.701617 | -0.20736 | 0.835728 | 0.879844 | 26.02015 | 6.568942 | 20.17621 | 15.62489 | 17.11289 | 15.07469 |
| 18811 | SDE2      | 1285.832 | -0.14561 | 0.119775 | -1.21567 | 0.224112 | 0.316731 | 1326.485 | 1504.288 | 1222.4   | 1216.509 | 1185.067 | 1260.244 |
| 16067 | PSMD4     | 4835.502 | -0.14561 | 0.088054 | -1.65363 | 0.098203 | 0.162491 | 5342.261 | 4854.995 | 5043.357 | 4560.235 | 4502.828 | 4709.334 |
| 24617 | LOC103242 | 29.09084 | -0.14566 | 0.464663 | -0.31348 | 0.753917 | 0.814189 | 29.27266 | 32.84471 | 29.91645 | 24.5534  | 27.80844 | 30.14938 |
| 21374 | ANKRD18A  | 3190.592 | -0.14568 | 0.177471 | -0.82089 | 0.411709 | 0.512083 | 2666.523 | 4606.47  | 2781.534 | 2910.694 | 3105.989 | 3072.222 |
| 19944 | ULK1      | 1727.276 | -0.14572 | 0.140259 | -1.03892 | 0.29884  | 0.398349 | 1877.245 | 1572.714 | 2000.923 | 1566.953 | 1437.482 | 1908.456 |
| 18151 | PPP1R12C  | 1550.567 | -0.14575 | 0.111051 | -1.31244 | 0.189371 | 0.277354 | 1664.205 | 1586.399 | 1639.839 | 1537.935 | 1311.275 | 1563.748 |
| 17866 | CAMTA1    | 1678.308 | -0.1458  | 0.10667  | -1.3668  | 0.171688 | 0.255455 | 1673.421 | 1780.731 | 1839.514 | 1468.74  | 1632.141 | 1675.301 |
| 18065 | INO80E    | 1176.118 | -0.14585 | 0.109586 | -1.33095 | 0.183206 | 0.269612 | 1202.348 | 1303.935 | 1202.92  | 1064.725 | 1123.033 | 1159.746 |
| 25170 | LOC119622 | 16.16206 | -0.14591 | 0.667216 | -0.21868 | 0.826899 | 0.873351 | 14.09425 | 20.80165 | 16.69755 | 17.85702 | 6.417332 | 21.10457 |
| 19068 | LOC119622 | 1107.381 | -0.14623 | 0.124492 | -1.17462 | 0.240145 | 0.334815 | 1082.546 | 1315.978 | 1092.994 | 1044.635 | 1026.773 | 1081.358 |
| 24461 | PRAC2     | 40.49503 | -0.14631 | 0.434894 | -0.33642 | 0.736556 | 0.800512 | 42.82482 | 32.84471 | 50.78839 | 40.17829 | 49.19955 | 27.13445 |
| 21500 | CCDC181   | 881.6067 | -0.14646 | 0.182353 | -0.80315 | 0.421889 | 0.521647 | 737.2375 | 1223.465 | 817.4844 | 805.7978 | 885.5918 | 820.0632 |
| 25665 | LOC103222 | 5.548423 | -0.14663 | 1.045555 | -0.14024 | 0.888471 | 0.920319 | 4.878777 | 6.02153  | 6.261582 | 6.696381 | 6.417332 | 3.014938 |
| 23091 | COL13A1   | 112.7359 | -0.14673 | 0.268274 | -0.54696 | 0.584409 | 0.672814 | 111.6698 | 119.3358 | 122.4487 | 138.3919 | 94.12087 | 90.44815 |
| 18399 | ZSCAN20   | 1151.543 | -0.14675 | 0.116051 | -1.26456 | 0.20603  | 0.297684 | 1251.677 | 1261.784 | 1116.649 | 1022.314 | 1159.398 | 1097.438 |
| 20274 | TMEM219   | 2201.645 | -0.1468  | 0.149234 | -0.98368 | 0.325275 | 0.426528 | 2552.685 | 1773.067 | 2618.037 | 2069.182 | 1965.843 | 2231.054 |
| 18256 | MASTL     | 1196.119 | -0.14689 | 0.11366  | -1.29234 | 0.196239 | 0.285771 | 1184.459 | 1371.267 | 1216.138 | 1127.224 | 1120.894 | 1156.731 |
| 21997 | CACNA1G   | 198.0016 | -0.14707 | 0.201927 | -0.72834 | 0.466404 | 0.563692 | 203.8245 | 188.8571 | 230.2871 | 198.6593 | 192.52   | 173.8614 |
| 17321 | LOC103233 | 3707.713 | -0.1473  | 0.101921 | -1.44523 | 0.148392 | 0.227746 | 3787.015 | 4218.903 | 3690.159 | 3419.619 | 3349.847 | 3780.733 |
| 18843 |           |          |          |          |          |          |          |          |          |          |          |          |          |



|       |           |          |          |          |          |          |          |          |          |          |          |          |          |
|-------|-----------|----------|----------|----------|----------|----------|----------|----------|----------|----------|----------|----------|----------|
| 19990 | DNAJC17   | 557.2059 | -0.14752 | 0.143046 | -1.03127 | 0.302415 | 0.402187 | 573.5274 | 634.4503 | 549.6278 | 569.1924 | 472.7435 | 543.6939 |
| 18776 | EHMT1     | 2306.801 | -0.14788 | 0.121008 | -1.22208 | 0.221677 | 0.313873 | 2243.695 | 2743.628 | 2292.435 | 2160.699 | 2006.486 | 2393.861 |
| 17984 | LOC103230 | 4802.206 | -0.14793 | 0.109895 | -1.34608 | 0.178277 | 0.263525 | 4596.35  | 5703.484 | 4840.203 | 4653.985 | 4735.991 | 4283.222 |
| 24800 | LOC119620 | 30.29401 | -0.14793 | 0.526875 | -0.28077 | 0.778887 | 0.834948 | 34.69353 | 18.06459 | 43.83108 | 22.32127 | 25.66933 | 37.18424 |
| 18985 | AHSA2P    | 1509.105 | -0.14799 | 0.124663 | -1.1871  | 0.235189 | 0.329339 | 1482.064 | 1816.86  | 1456.861 | 1508.918 | 1433.204 | 1356.722 |
| 22535 | B3GNT9    | 137.3724 | -0.14849 | 0.233783 | -0.63518 | 0.525309 | 0.619718 | 145.2791 | 155.465  | 132.189  | 116.0706 | 147.5986 | 127.6324 |
| 16629 | LOC103240 | 3553.967 | -0.14862 | 0.095706 | -1.55285 | 0.12046  | 0.192581 | 3710.039 | 3976.947 | 3525.967 | 3203.102 | 3437.551 | 3470.194 |
| 20859 | LRWD1     | 1841.891 | -0.14878 | 0.165905 | -0.8968  | 0.369825 | 0.471346 | 2181.356 | 1501.003 | 2133.808 | 1709.809 | 1463.152 | 2062.218 |
| 25184 | LOC119620 | 15.49886 | -0.14907 | 0.68753  | -0.21682 | 0.828346 | 0.874427 | 17.88885 | 14.23271 | 16.00182 | 11.16063 | 25.66933 | 8.039836 |
| 20373 | ZNF414    | 388.9396 | -0.14915 | 0.154442 | -0.96572 | 0.334183 | 0.43608  | 395.723  | 416.033  | 416.7431 | 395.0865 | 325.1448 | 384.9071 |
| 19048 | CUNH2orf1 | 661.0797 | -0.14925 | 0.126738 | -1.1776  | 0.238958 | 0.333526 | 700.9177 | 723.6784 | 663.7277 | 609.3707 | 607.5074 | 661.2765 |
| 16303 | EFEMP2    | 5355.002 | -0.14944 | 0.093038 | -1.60621 | 0.108227 | 0.176484 | 5651.25  | 5576.484 | 5676.472 | 5015.589 | 4721.017 | 5489.198 |
| 23928 | LOC119610 | 59.5086  | -0.14945 | 0.356689 | -0.41899 | 0.675222 | 0.7502   | 69.92914 | 67.87906 | 50.09266 | 42.41041 | 68.45154 | 58.28881 |
| 23347 | LOC103240 | 82.91242 | -0.1495  | 0.29509  | -0.50662 | 0.612424 | 0.697361 | 84.56547 | 79.37471 | 96.70666 | 93.74933 | 72.72976 | 70.34856 |
| 19859 | CDK19     | 2899.196 | -0.14951 | 0.142952 | -1.04585 | 0.295632 | 0.395012 | 2670.317 | 3790.827 | 2688.306 | 2758.909 | 2590.463 | 2896.351 |
| 18827 | ATG4B     | 1536.648 | -0.14955 | 0.123146 | -1.2144  | 0.224595 | 0.317143 | 1732.508 | 1501.003 | 1622.446 | 1388.383 | 1328.388 | 1647.161 |
| 19196 | HMCES     | 1305.695 | -0.14963 | 0.129605 | -1.15451 | 0.248293 | 0.343866 | 1493.448 | 1279.849 | 1352.502 | 1245.527 | 1075.973 | 1386.872 |
| 17006 | PDGFA     | 1526.456 | -0.14993 | 0.100539 | -1.4913  | 0.135883 | 0.212422 | 1623.007 | 1639.498 | 1557.743 | 1406.24  | 1426.787 | 1505.459 |
| 18099 | ASCC3     | 8218.06  | -0.14996 | 0.113498 | -1.32128 | 0.186408 | 0.273808 | 7992.521 | 10057.6  | 7886.115 | 7526.732 | 7771.389 | 8074.005 |
| 23826 | LOC119620 | 60.20792 | -0.14997 | 0.34587  | -0.43361 | 0.664569 | 0.741505 | 63.96619 | 59.66789 | 65.39875 | 49.10679 | 74.86887 | 48.23901 |
| 16731 | ZC3H12C   | 2011.51  | -0.15003 | 0.097585 | -1.53742 | 0.124189 | 0.197333 | 2135.278 | 2209.901 | 2003.706 | 1917.397 | 1863.165 | 1939.61  |
| 25091 | LOC103240 | 15.69619 | -0.15013 | 0.646636 | -0.23216 | 0.81641  | 0.865022 | 14.63633 | 13.6853  | 20.87194 | 20.08914 | 12.83466 | 12.05975 |
| 18741 | PRPF39    | 2203.407 | -0.15017 | 0.122498 | -1.22592 | 0.220229 | 0.312405 | 2148.288 | 2702.025 | 2103.196 | 2026.771 | 2149.806 | 2090.357 |
| 12165 | ATG4D     | 583.1793 | -0.15024 | 0.178818 | -0.84018 | 0.40081  | 0.501083 | 726.3957 | 470.7742 | 645.6387 | 551.3354 | 506.9692 | 597.9628 |
| 16052 | PDLIM7    | 4748.03  | -0.15027 | 0.090739 | -1.65609 | 0.097704 | 0.161815 | 4727.535 | 5279.24  | 4982.132 | 4450.861 | 4387.316 | 4661.095 |
| 25085 | TRNAR-CC1 | 19.92524 | -0.15037 | 0.646067 | -0.23275 | 0.815954 | 0.864745 | 17.34676 | 21.34906 | 25.74206 | 13.39276 | 8.556443 | 33.16432 |
| 23111 | LOC103210 | 97.09736 | -0.15052 | 0.277569 | -0.54227 | 0.587633 | 0.675965 | 98.65972 | 108.935  | 97.40239 | 84.82083 | 113.3729 | 79.39338 |
| 22656 | MPP2      | 136.0371 | -0.15061 | 0.245288 | -0.614   | 0.539214 | 0.632724 | 123.0536 | 147.2538 | 157.931  | 120.5349 | 151.8769 | 115.5726 |
| 19628 | IRF2      | 1957.865 | -0.15064 | 0.139374 | -1.08086 | 0.279759 | 0.378917 | 1856.646 | 2513.715 | 1808.206 | 1814.719 | 1935.895 | 1818.008 |
| 26199 | TRNAW-CC1 | 0.814114 | -0.15079 | 2.685945 | -0.05614 | 0.955229 | 0.969192 | 1.084173 | 1.094824 | 0.695731 | 0        | 0        | 2.009959 |
| 26201 | LOC119610 | 0.814114 | -0.15079 | 2.685945 | -0.05614 | 0.955229 | 0.969192 | 1.084173 | 1.094824 | 0.695731 | 0        | 0        | 2.009959 |
| 20080 | LOC103230 | 1177.216 | -0.15083 | 0.1485   | -1.01566 | 0.309789 | 0.410146 | 1366.058 | 1003.953 | 1350.415 | 1089.278 | 1022.495 | 1231.1   |
| 22724 | PROB1     | 120.4766 | -0.15098 | 0.249656 | -0.60475 | 0.545346 | 0.638005 | 129.5586 | 111.672  | 137.7548 | 118.3027 | 124.0684 | 101.5029 |
| 17687 | FBX042    | 1687.327 | -0.15101 | 0.108836 | -1.38754 | 0.165277 | 0.248425 | 1802.336 | 1727.632 | 1803.336 | 1450.883 | 1600.055 | 1739.619 |
| 19638 | USP53     | 1808.918 | -0.15108 | 0.139957 | -1.07949 | 0.280371 | 0.379545 | 1685.347 | 2321.574 | 1703.15  | 1656.238 | 1779.74  | 1707.46  |
| 18599 | ZNF280D   | 2164.322 | -0.15125 | 0.122392 | -1.23579 | 0.216537 | 0.309497 | 2160.214 | 2634.146 | 2037.101 | 1982.129 | 2158.363 | 2013.979 |
| 21978 | CDH26     | 229.3376 | -0.15134 | 0.206875 | -0.73155 | 0.464443 | 0.561798 | 210.3295 | 281.9171 | 233.07   | 185.2665 | 235.3022 | 230.1403 |
| 21730 | ZNF582    | 202.5947 | -0.15137 | 0.195793 | -0.77309 | 0.439468 | 0.537656 | 228.7604 | 203.0898 | 209.4151 | 189.7308 | 177.5462 | 207.0258 |
| 18888 | HABP4     | 3025.526 | -0.15139 | 0.125549 | -1.2058  | 0.227894 | 0.320763 | 3036.226 | 3748.129 | 2769.011 | 2897.301 | 2733.783 | 2968.709 |
| 16644 | TNFRSF21  | 13933.34 | -0.15146 | 0.097723 | -1.54991 | 0.121164 | 0.193531 | 14620.61 | 15182.47 | 14198.49 | 12758.84 | 12195.07 | 14644.56 |
| 19571 | LRRC28    | 665.537  | -0.15148 | 0.139172 | -1.08843 | 0.276406 | 0.375467 | 760.0051 | 668.9372 | 676.2509 | 636.1562 | 560.447  | 691.4259 |
| 18278 | ZBTB39    | 994.2322 | -0.15151 | 0.117668 | -1.28759 | 0.197888 | 0.287808 | 993.6443 | 1127.668 | 1020.638 | 928.5648 | 906.9829 | 987.8948 |
| 17887 | BAG5      | 2750.149 | -0.15153 | 0.111215 | -1.36247 | 0.17305  | 0.2572   | 2734.826 | 3279.544 | 2669.521 | 2531.232 | 2639.663 | 2646.111 |
| 19258 | CRTC3     | 1289.049 | -0.15195 | 0.13288  | -1.1435  | 0.252832 | 0.349025 | 1226.741 | 1569.977 | 1277.363 | 1131.688 | 1215.015 | 1313.508 |
| 20804 | ZNF71     | 284.1459 | -0.15209 | 0.168291 | -0.90375 | 0.366127 | 0.467866 | 289.4741 | 291.2231 | 317.2535 | 279.0159 | 254.5542 | 273.3544 |
| 17735 | AP3D1     | 9496.538 | -0.15214 | 0.110368 | -1.37849 | 0.168051 | 0.251914 | 9397.609 | 11186.91 | 9411.854 | 8935.204 | 8209.907 | 9837.744 |
| 18746 | SLC38A9   | 746.9626 | -0.15217 | 0.124234 | -1.22486 | 0.220628 | 0.312888 | 772.4731 | 841.372  | 745.1283 | 678.5666 | 733.715  | 710.5205 |
| 20723 | LOC103230 | 299.0936 | -0.15227 | 0.166389 | -0.91513 | 0.360122 | 0.461991 | 330.1306 | 314.7618 | 301.2517 | 261.1589 | 288.7799 | 298.4789 |
| 17127 | ORMDL1    | 1480.342 | -0.15229 | 0.103096 | -1.47714 | 0.139639 | 0.216751 | 1511.879 | 1553.007 | 1614.097 | 1404.008 | 1334.805 | 1464.255 |
| 21209 | FABP5     | 803.0547 | -0.15232 | 0.179487 | -0.84863 | 0.396085 | 0.496484 | 708.5069 | 1073.475 | 749.9984 | 841.5119 | 793.6101 | 651.2267 |
| 16551 | RAD54L2   | 4063.445 | -0.15232 | 0.097296 | -1.56554 | 0.117457 | 0.188665 | 4266.762 | 4504.652 | 4067.941 | 3776.759 | 3630.071 | 4134.486 |
| 17251 | NEURL4    | 2460.959 | -0.15237 | 0.104519 | -1.45778 | 0.1449   | 0.223301 | 2608.52  | 2513.168 | 2659.085 | 2216.502 | 2194.728 | 2573.752 |
| 18313 | LOC103230 | 1937.55  | -0.15252 | 0.11914  | -1.28015 | 0.200494 | 0.291057 | 1905.434 | 2336.354 | 1874.996 | 1886.147 | 1854.609 | 1767.759 |
| 21192 | FRZB      | 293.4268 | -0.1526  | 0.179271 | -0.85123 | 0.394643 | 0.495049 | 274.2957 | 343.7746 | 306.8175 | 276.7837 | 301.6146 | 257.2747 |
| 17099 | CDK16     | 7699.292 | -0.1526  | 0.102997 | -1.48161 | 0.138444 | 0.215248 | 7812.549 | 8751.473 | 7761.579 | 7171.824 | 6699.695 | 7998.632 |
| 22557 | LOC119620 | 169.7287 | -0.15265 | 0.241819 | -0.63125 | 0.527879 | 0.622114 | 166.9626 | 210.7535 | 161.4097 | 151.7846 | 130.4858 | 196.976  |
| 16542 | NCAPD3    | 5365.545 | -0.15265 | 0.097417 | -1.56697 | 0.117122 | 0.188229 | 5870.253 | 5688.704 | 5396.093 | 4935.233 | 4759.521 | 5543.467 |
| 14966 | AGPS      | 8033.189 | -0.15272 | 0.082986 | -1.84035 | 0.065717 | 0.116738 | 8338.915 | 8836.322 | 8201.281 | 7533.429 | 7497.583 | 7791.606 |
| 19119 | FERMT2    | 5755.887 | -0.15283 | 0.131156 | -1.16528 | 0.243906 | 0.339151 | 5476.157 | 7411.956 | 5293.82  | 5397.283 | 5373.446 | 5582.661 |
| 19150 | MUTYH     | 613.5885 | -0.1529  | 0.131718 | -1.16083 | 0.245712 | 0.341109 | 632.6148 | 623.5021 | 684.5997 | 593.7458 | 539.0559 | 608.0126 |
| 25937 | LOC119620 | 2.582495 | -0.15291 | 1.545233 | -0.09896 | 0.921173 | 0.944187 | 2.710432 | 1.094824 | 4.174388 | 2.232127 | 4.278221 | 1.004979 |
| 21933 | LOC103220 | 269.5657 | -0.15292 | 0.207179 | -0.7381  | 0.460451 | 0.558113 | 292.1846 | 238.6716 | 322.8194 | 281.248  | 201.0764 | 281.3943 |
| 18629 | GSS       | 2584.353 | -0.15293 | 0.123933 | -1.23394 | 0.217227 | 0.309867 | 2995.569 | 2326.5   | 2846.933 | 2321.412 | 2344.465 | 2671.235 |
| 24271 | LOC103240 | 39.74219 | -0.15296 | 0.417812 | -0.36611 | 0.714284 | 0.782364 | 39.03022 | 49.26706 | 38.26523 | 35.71403 | 29.94755 | 46.22906 |
| 18191 | SETX      | 10559.45 | -0.15307 | 0.117485 | -1.30287 | 0.19262  | 0.281502 | 10263.86 | 13028.95 | 10067.93 | 9749.931 | 9583.216 | 10662.83 |
| 23239 | HCLS1     | 87.17341 | -0.15315 | 0.29273  | -0.52319 | 0.60084  | 0.687341 | 94.86511 | 96.34448 | 82.0963  | 89.28508 | 94.12087 | 66.32864 |
| 17421 | LRP8      | 15633.01 | -0.15327 | 0.107508 | -1.42567 | 0.153964 | 0.234955 | 15378.45 | 18730.79 | 15283.13 | 14323.56 | 14282.84 | 15799.28 |
| 18600 | LOC103230 | 643.9177 | -0.15332 | 0.124065 | -1.2358  | 0.216532 | 0.309497 | 682.4867 | 688.6441 | 662.3363 | 593.7458 | 635.3159 | 600.9777 |
| 25805 | TRNAG-GC  | 3.72406  | -0.15338 | 1.283289 | -0.11952 | 0.904861 | 0.932212 | 4.336691 | 4.379295 | 2.782925 | 6.696381 | 2.139111 | 2.009959 |
| 22146 | CUNH16orf | 152.0463 | -0.15341 | 0.219052 | -0.70032 | 0.48373  | 0.58069  | 171.2993 | 147.2538 | 162.1054 | 136.1597 | 149.7377 | 145.722  |
| 15956 | PRMT2     | 3057.25  | -0.15    |          |          |          |          |          |          |          |          |          |          |



|       |           |          |          |          |          |          |          |          |          |          |          |          |          |
|-------|-----------|----------|----------|----------|----------|----------|----------|----------|----------|----------|----------|----------|----------|
| 25059 | MPL       | 16.02877 | -0.15404 | 0.651864 | -0.2363  | 0.813199 | 0.862711 | 15.7205  | 15.32753 | 18.78475 | 22.32127 | 14.97377 | 9.044815 |
| 17375 | SF3A2     | 1269.432 | -0.15407 | 0.107351 | -1.4352  | 0.151229 | 0.231391 | 1256.014 | 1364.698 | 1392.854 | 1196.42  | 1176.511 | 1230.095 |
| 20201 | NEIL2     | 467.9841 | -0.15412 | 0.154638 | -0.99665 | 0.318936 | 0.419728 | 537.7497 | 440.1191 | 504.4052 | 424.1041 | 417.1266 | 484.4001 |
| 25407 | LOC103225 | 9.31109  | -0.15421 | 0.857616 | -0.17981 | 0.857301 | 0.89705  | 10.29964 | 10.40082 | 9.044508 | 2.232127 | 12.83466 | 11.05477 |
| 22023 | SLC27A5   | 194.7584 | -0.15428 | 0.213617 | -0.72223 | 0.470155 | 0.567546 | 200.572  | 178.4563 | 236.5487 | 205.3557 | 164.7115 | 182.9063 |
| 24696 | LOC119624 | 26.5537  | -0.15445 | 0.514977 | -0.29992 | 0.764237 | 0.822694 | 28.73058 | 19.15941 | 36.17803 | 22.32127 | 27.80844 | 25.12449 |
| 18043 | DDX6      | 16178.55 | -0.15446 | 0.115635 | -1.33573 | 0.181638 | 0.267631 | 15544.33 | 19945.5  | 15644.91 | 14901.68 | 14766.28 | 16268.61 |
| 19213 | NUS1      | 1809.2   | -0.15453 | 0.134208 | -1.15144 | 0.24955  | 0.345301 | 1743.892 | 2263     | 1714.282 | 1613.828 | 1677.063 | 1843.132 |
| 16859 | SNRPG     | 3581.549 | -0.15456 | 0.102154 | -1.513   | 0.13028  | 0.205417 | 3726.302 | 3616.75  | 3969.147 | 3578.1   | 3533.811 | 3065.187 |
| 17952 | AHCTF1    | 10123.58 | -0.15457 | 0.114443 | -1.35067 | 0.176801 | 0.261823 | 9885.487 | 12424.06 | 9689.451 | 9408.415 | 9243.097 | 10091    |
| 18210 | ZBTB33    | 1414.045 | -0.15468 | 0.118998 | -1.29986 | 0.193649 | 0.28271  | 1385.031 | 1679.459 | 1404.682 | 1296.866 | 1377.587 | 1340.643 |
| 24299 | LOC103245 | 48.00388 | -0.15477 | 0.427181 | -0.36231 | 0.717124 | 0.784589 | 64.50828 | 37.77142 | 48.00546 | 42.41041 | 64.17332 | 31.15436 |
| 16919 | TBC1D9B   | 16343.01 | -0.1548  | 0.102957 | -1.50354 | 0.1327   | 0.208513 | 18098.1  | 16238.42 | 17329.28 | 15211.95 | 13979.09 | 17201.23 |
| 17719 | LAMTOR2   | 1684.455 | -0.15484 | 0.112065 | -1.38169 | 0.167066 | 0.250661 | 1754.191 | 1790.584 | 1779.681 | 1424.097 | 1773.323 | 1584.853 |
| 21143 | TSGA10    | 463.7922 | -0.15488 | 0.180252 | -0.85926 | 0.390198 | 0.490631 | 431.5008 | 601.6056 | 435.5278 | 410.7114 | 414.9875 | 488.42   |
| 17344 | PPP6C     | 2565.205 | -0.155   | 0.10764  | -1.44003 | 0.14986  | 0.229707 | 2512.57  | 2969.162 | 2631.256 | 2296.859 | 2408.639 | 2572.747 |
| 15419 | LOC103216 | 5090.148 | -0.15519 | 0.088299 | -1.75753 | 0.078828 | 0.135912 | 5420.864 | 5564.441 | 5108.755 | 4821.394 | 4639.731 | 4985.703 |
| 20120 | COX16     | 1682.643 | -0.15523 | 0.153778 | -1.00946 | 0.312753 | 0.413247 | 1926.033 | 1349.37  | 2044.059 | 1687.488 | 1508.073 | 1580.833 |
| 21892 | LOC119618 | 301.0634 | -0.1554  | 0.208511 | -0.74526 | 0.456113 | 0.553891 | 280.2587 | 402.3477 | 267.8566 | 267.8552 | 318.7275 | 269.3345 |
| 23982 | LOC119627 | 52.96727 | -0.15549 | 0.379501 | -0.40973 | 0.682003 | 0.756028 | 48.24569 | 61.85754 | 59.13717 | 46.87467 | 36.36488 | 65.32367 |
| 16023 | HGS       | 2871.856 | -0.15552 | 0.093589 | -1.66176 | 0.096562 | 0.160213 | 3098.566 | 3015.692 | 2970.077 | 2720.963 | 2562.655 | 2863.187 |
| 24880 | LOC119621 | 21.53813 | -0.15579 | 0.577837 | -0.2696  | 0.787465 | 0.841445 | 21.68345 | 19.70683 | 25.74206 | 20.08914 | 29.94755 | 12.05975 |
| 18824 | TOP3B     | 1620.309 | -0.15581 | 0.128282 | -1.2146  | 0.224519 | 0.317087 | 1751.481 | 1595.158 | 1784.551 | 1495.525 | 1328.388 | 1766.754 |
| 16295 | ANXA2     | 103701.7 | -0.15591 | 0.096962 | -1.6079  | 0.107856 | 0.175965 | 117763.9 | 99125.33 | 111015.1 | 97061.81 | 93040.62 | 104203.3 |
| 18100 | EIF4G1    | 30785.63 | -0.156   | 0.11808  | -1.32112 | 0.18646  | 0.273869 | 29363.73 | 37840.39 | 30146.04 | 28691.76 | 26984.88 | 31687    |
| 24157 | KATNAL2   | 49.12231 | -0.15605 | 0.409285 | -0.38126 | 0.703008 | 0.773634 | 49.87195 | 54.74118 | 48.7012  | 49.10679 | 64.17332 | 28.13943 |
| 23916 | PLXDC1    | 55.82077 | -0.15608 | 0.37102  | -0.42069 | 0.673984 | 0.7492   | 54.75072 | 61.85754 | 61.92009 | 35.71403 | 51.33866 | 69.34358 |
| 24433 | LOC103226 | 36.09048 | -0.15609 | 0.459403 | -0.33978 | 0.734025 | 0.798631 | 39.5723  | 31.74989 | 44.52681 | 26.78552 | 25.66933 | 48.23901 |
| 15670 | HAUS2     | 3162.714 | -0.15625 | 0.090712 | -1.72247 | 0.084984 | 0.144179 | 3425.444 | 3171.157 | 3406.301 | 2908.461 | 3043.954 | 3020.968 |
| 20068 | LOC103234 | 848.154  | -0.1564  | 0.153643 | -1.01795 | 0.308703 | 0.408953 | 781.1465 | 1084.423 | 814.7014 | 794.6372 | 849.2269 | 764.7894 |
| 18365 | MYG1      | 1336.304 | -0.15656 | 0.123198 | -1.27082 | 0.203794 | 0.29501  | 1516.758 | 1259.595 | 1454.079 | 1274.545 | 1155.12  | 1357.727 |
| 25574 | TEX48     | 7.735331 | -0.15659 | 1.010365 | -0.15498 | 0.876836 | 0.911463 | 7.047123 | 6.568942 | 10.43597 | 2.232127 | 17.11289 | 3.014938 |
| 25462 | LOC103227 | 7.772879 | -0.15659 | 0.919534 | -0.17029 | 0.864781 | 0.902922 | 5.96295  | 9.306001 | 9.044508 | 4.464254 | 12.83466 | 5.024897 |
| 18788 | LHFPL2    | 628.7913 | -0.15663 | 0.128435 | -1.21952 | 0.222648 | 0.315047 | 652.1299 | 668.9372 | 671.3808 | 558.0317 | 586.1163 | 636.152  |
| 20216 | TRABD     | 1377.852 | -0.15667 | 0.157587 | -0.99416 | 0.320145 | 0.421006 | 1620.838 | 1126.026 | 1614.793 | 1305.794 | 1161.537 | 1438.126 |
| 22658 | RNFT2     | 112.0979 | -0.15681 | 0.255523 | -0.61369 | 0.539419 | 0.632909 | 110.5856 | 114.4091 | 129.406  | 93.74933 | 121.9293 | 102.5079 |
| 20301 | SHISA4    | 598.0689 | -0.15689 | 0.160382 | -0.97823 | 0.327962 | 0.42948  | 579.4903 | 752.6912 | 561.4552 | 566.9603 | 519.8039 | 608.0126 |
| 19611 | IQUB      | 717.0015 | -0.15691 | 0.144756 | -1.08395 | 0.278386 | 0.377385 | 709.049  | 853.9624 | 702.6887 | 629.4598 | 763.6625 | 643.1869 |
| 19442 | CCDC102A  | 569.009  | -0.15703 | 0.141363 | -1.11083 | 0.266643 | 0.364608 | 647.2511 | 567.1186 | 588.5887 | 544.639  | 485.5781 | 580.8781 |
| 14832 | ALDH1A1   | 61515.89 | -0.15714 | 0.084246 | -1.86527 | 0.062144 | 0.111388 | 64127.19 | 68164.81 | 62301.35 | 57939.32 | 55663.94 | 60898.74 |
| 18283 | ADCY1     | 835.9396 | -0.15724 | 0.122183 | -1.28695 | 0.198112 | 0.288071 | 898.7792 | 856.1521 | 894.7105 | 741.0662 | 763.6625 | 861.2674 |
| 24193 | LOC103227 | 41.34474 | -0.15742 | 0.420201 | -0.37464 | 0.70793  | 0.777924 | 47.16151 | 49.81448 | 32.69937 | 40.17829 | 47.06043 | 31.15436 |
| 18441 | NRDE2     | 1106.966 | -0.15762 | 0.125289 | -1.25801 | 0.208387 | 0.300416 | 1157.896 | 1249.741 | 1099.951 | 1031.243 | 941.2087 | 1161.756 |
| 18503 | MRPS34    | 1630.801 | -0.15764 | 0.125957 | -1.25151 | 0.210748 | 0.302801 | 1587.771 | 1970.135 | 1598.791 | 1676.327 | 1467.43  | 1484.355 |
| 17352 | TRIM13    | 951.6525 | -0.15772 | 0.109615 | -1.43884 | 0.150196 | 0.230116 | 1015.87  | 1002.311 | 994.2001 | 881.6902 | 896.2874 | 919.5562 |
| 19490 | LOC103235 | 1366.608 | -0.15775 | 0.143144 | -1.10203 | 0.27045  | 0.368902 | 1619.212 | 1177.483 | 1530.609 | 1294.634 | 1180.789 | 1396.921 |
| 20794 | SIRT6     | 421.6619 | -0.15779 | 0.174258 | -0.90549 | 0.365203 | 0.466919 | 503.5982 | 359.1022 | 471.7059 | 379.4616 | 417.1266 | 398.9768 |
| 19267 | CHKB      | 1120.662 | -0.1578  | 0.138249 | -1.1414  | 0.253705 | 0.350049 | 1287.455 | 1011.07  | 1251.621 | 1058.028 | 954.0434 | 1161.756 |
| 16736 | CAMK1     | 1495.241 | -0.15784 | 0.102725 | -1.53655 | 0.124402 | 0.197612 | 1540.609 | 1597.348 | 1596.008 | 1441.954 | 1326.249 | 1469.28  |
| 16333 | PP6R3     | 9564.048 | -0.15804 | 0.098817 | -1.59933 | 0.109747 | 0.178633 | 9590.05  | 11252.05 | 9421.594 | 8950.829 | 8900.839 | 9268.926 |
| 17234 | TAF5L     | 1172.901 | -0.15813 | 0.108149 | -1.46214 | 0.143703 | 0.221675 | 1207.226 | 1256.858 | 1250.925 | 1111.599 | 1046.025 | 1164.771 |
| 18410 | ERCC4     | 1020.534 | -0.15819 | 0.125175 | -1.26376 | 0.206316 | 0.297931 | 1054.358 | 1204.306 | 969.8495 | 955.3503 | 977.5736 | 961.7654 |
| 19224 | CHCHD5    | 527.989  | -0.15824 | 0.137565 | -1.15027 | 0.250033 | 0.345773 | 515.5241 | 582.9936 | 573.9784 | 493.3001 | 485.5781 | 516.5594 |
| 21181 | ZDHHC23   | 242.3589 | -0.15825 | 0.185494 | -0.85314 | 0.393582 | 0.493994 | 268.3328 | 267.6844 | 232.3743 | 229.9091 | 209.6328 | 246.22   |
| 14591 | RRM2      | 9562.638 | -0.15826 | 0.082923 | -1.90852 | 0.056323 | 0.102622 | 10354.93 | 10174.2  | 9735.369 | 8845.919 | 8853.779 | 9411.633 |
| 17462 | MMGT1     | 3654.78  | -0.15832 | 0.111749 | -1.4168  | 0.156543 | 0.238328 | 3556.087 | 4417.613 | 3592.061 | 3477.654 | 3381.934 | 3503.358 |
| 21238 | PPP4R2    | 297.1843 | -0.15878 | 0.188045 | -0.84437 | 0.398462 | 0.498781 | 345.8511 | 266.5896 | 331.1681 | 249.9982 | 275.9453 | 313.5536 |
| 25147 | LOC103245 | 15.59728 | -0.15878 | 0.714337 | -0.22228 | 0.824095 | 0.871227 | 20.0572  | 10.94824 | 17.39328 | 15.62489 | 23.53022 | 6.029877 |
| 19936 | LOC103247 | 1872.192 | -0.15887 | 0.15256  | -1.04137 | 0.297702 | 0.39699  | 2206.292 | 1538.227 | 2185.988 | 1674.095 | 1640.698 | 1987.849 |
| 17019 | EMC1      | 3669.687 | -0.15891 | 0.106653 | -1.48996 | 0.136234 | 0.212795 | 3793.52  | 4226.567 | 3600.41  | 3374.976 | 3260.005 | 3762.643 |
| 19106 | MCTP2     | 610.9972 | -0.159   | 0.136132 | -1.16802 | 0.242799 | 0.337842 | 617.9785 | 708.3509 | 605.2863 | 584.8173 | 596.8119 | 552.7387 |
| 18231 | HSBP1L1   | 2047.878 | -0.15923 | 0.122957 | -1.295   | 0.195321 | 0.284823 | 1900.555 | 2503.862 | 2077.454 | 1941.95  | 1935.895 | 1927.551 |
| 16656 | LMBR1     | 1545.11  | -0.15945 | 0.103061 | -1.5471  | 0.121839 | 0.194471 | 1591.566 | 1711.209 | 1586.963 | 1531.239 | 1407.535 | 1442.146 |
| 24167 | LOC119626 | 49.33867 | -0.15954 | 0.419691 | -0.38014 | 0.70384  | 0.774262 | 50.95612 | 51.45671 | 55.65851 | 49.10679 | 23.53022 | 65.32367 |
| 22166 | FMC1      | 466.085  | -0.1596  | 0.228894 | -0.69726 | 0.485641 | 0.582458 | 558.891  | 307.6454 | 609.4607 | 468.7467 | 408.5701 | 443.1959 |
| 25125 | FAM189A1  | 13.00602 | -0.15998 | 0.703992 | -0.22725 | 0.820227 | 0.86789  | 12.46799 | 16.42235 | 11.82743 | 11.16063 | 17.11289 | 9.044815 |
| 20514 | ING2      | 1297.979 | -0.16    | 0.16955  | -0.94368 | 0.345334 | 0.447511 | 1157.896 | 1795.511 | 1154.914 | 1258.92  | 1225.71  | 1194.921 |
| 20861 | LOC119624 | 428.4324 | -0.16025 | 0.178754 | -0.89646 | 0.370007 | 0.47151  | 393.5547 | 546.8644 | 418.8303 | 370.5331 | 393.5964 | 447.2159 |
| 24637 | LOC103245 | 34.81292 | -0.16028 | 0.518282 | -0.30925 | 0.757129 | 0.816994 | 41.74065 | 25.72836 | 41.04815 | 44.64254 | 40.6431  | 15.07469 |
| 23716 | SNTN      | 60.72822 | -0.16058 | 0.355455 | -0.45177 | 0.651437 | 0.730241 | 68.30288 | 49.26706 | 73.74753 | 69.19594 | 55.61688 | 48.23901 |
| 25282 | LOC103247 | 11.71711 | -0.16068 | 0.7947   |          |          |          |          |          |          |          |          |          |



|       |           |          |          |          |          |          |          |          |          |          |          |          |          |
|-------|-----------|----------|----------|----------|----------|----------|----------|----------|----------|----------|----------|----------|----------|
| 18928 | SERGEF    | 1018.526 | -0.16126 | 0.13449  | -1.19901 | 0.230523 | 0.323777 | 1170.907 | 968.9189 | 1092.298 | 919.6363 | 877.0354 | 1082.363 |
| 22322 | LRRC32    | 120.3035 | -0.16148 | 0.240439 | -0.6716  | 0.501836 | 0.597675 | 135.5216 | 126.9995 | 118.9701 | 109.3742 | 113.3729 | 117.5826 |
| 21999 | IL17RD    | 156.943  | -0.16149 | 0.221894 | -0.72779 | 0.466743 | 0.564042 | 178.3464 | 175.1718 | 144.0164 | 140.624  | 149.7377 | 153.7619 |
| 23171 | LOC103245 | 178.2708 | -0.16149 | 0.302327 | -0.53417 | 0.593223 | 0.680628 | 202.7403 | 109.4824 | 251.159  | 196.4272 | 171.1289 | 138.6872 |
| 17110 | JPH3      | 2553.423 | -0.16151 | 0.109123 | -1.48008 | 0.138851 | 0.215742 | 2623.156 | 2735.417 | 2737.007 | 2446.411 | 2128.415 | 2650.131 |
| 18972 | PALB2     | 1672.588 | -0.16172 | 0.135921 | -1.1898  | 0.234126 | 0.328075 | 1595.36  | 2126.695 | 1575.832 | 1560.257 | 1608.611 | 1568.773 |
| 25561 | LOC119625 | 6.343814 | -0.16174 | 1.037184 | -0.15594 | 0.87608  | 0.911099 | 10.84173 | 3.831883 | 5.565851 | 2.232127 | 8.556443 | 7.034856 |
| 22449 | LOC103236 | 129.6613 | -0.16191 | 0.249343 | -0.64936 | 0.516105 | 0.611185 | 125.764  | 164.2235 | 120.3615 | 127.2312 | 119.7902 | 120.5975 |
| 15795 | FSTL1     | 30236.09 | -0.16193 | 0.095081 | -1.70303 | 0.088563 | 0.149063 | 33449.44 | 30970.37 | 31383.05 | 27412.75 | 26758.14 | 31442.79 |
| 15666 | CUNH11or  | 5986.939 | -0.16194 | 0.094006 | -1.72263 | 0.084955 | 0.144168 | 6162.438 | 6772.032 | 6027.817 | 5674.067 | 5931.754 | 5353.526 |
| 15788 | RAF1      | 4540.314 | -0.16197 | 0.095073 | -1.70367 | 0.088442 | 0.148925 | 4989.363 | 4580.742 | 4821.418 | 4227.649 | 4027.945 | 4594.766 |
| 23217 | LOC103224 | 84.93544 | -0.16201 | 0.307507 | -0.52684 | 0.598304 | 0.685081 | 93.23886 | 93.60742 | 84.87923 | 69.19594 | 64.17332 | 104.5179 |
| 16340 | LOC103248 | 1600.153 | -0.16208 | 0.101432 | -1.59791 | 0.110064 | 0.179072 | 1706.488 | 1767.045 | 1596.703 | 1511.15  | 1490.96  | 1528.574 |
| 21739 | CD320     | 684.8467 | -0.16238 | 0.21057  | -0.77114 | 0.440622 | 0.538844 | 860.8332 | 476.7957 | 835.5734 | 602.6743 | 592.5337 | 740.6699 |
| 16469 | MYNN      | 1590.971 | -0.16242 | 0.10291  | -1.57824 | 0.11451  | 0.184847 | 1679.926 | 1643.33  | 1714.282 | 1479.9   | 1604.333 | 1424.056 |
| 18454 | PIGB      | 826.1186 | -0.16272 | 0.129544 | -1.2561  | 0.209079 | 0.301202 | 833.1867 | 976.5827 | 806.3527 | 794.6372 | 787.1927 | 758.7595 |
| 24597 | LOC119625 | 28.49697 | -0.16297 | 0.514443 | -0.31679 | 0.751405 | 0.812141 | 38.48813 | 33.93953 | 18.08902 | 26.78552 | 23.53022 | 30.14938 |
| 17398 | PITHD1    | 1108.412 | -0.16308 | 0.114062 | -1.42974 | 0.152792 | 0.233474 | 1240.836 | 1154.492 | 1121.519 | 991.0644 | 1031.051 | 1111.507 |
| 23283 | ITGB1BP2  | 93.50642 | -0.16309 | 0.315857 | -0.51635 | 0.605611 | 0.691499 | 123.0536 | 78.8273  | 92.53227 | 87.05295 | 111.2338 | 68.3386  |
| 19622 | ACBD4     | 588.8782 | -0.16316 | 0.150743 | -1.08236 | 0.279091 | 0.378137 | 706.3385 | 539.748  | 622.6796 | 531.2462 | 543.3341 | 589.9229 |
| 20905 | VP551     | 1459.96  | -0.16318 | 0.183372 | -0.88986 | 0.373541 | 0.474955 | 1798.1   | 1088.802 | 1743.503 | 1437.49  | 1157.259 | 1534.604 |
| 18958 | PPP1R10   | 2937.027 | -0.1633  | 0.136822 | -1.19355 | 0.232656 | 0.326221 | 2684.954 | 3780.973 | 2845.541 | 2616.053 | 2770.148 | 2924.49  |
| 23571 | LOC103224 | 54.69532 | -0.16334 | 0.344957 | -0.47351 | 0.635847 | 0.717153 | 59.08741 | 60.76271 | 53.57132 | 46.87467 | 55.61688 | 52.25893 |
| 18338 | CYB561    | 2340.098 | -0.16356 | 0.128064 | -1.27715 | 0.201549 | 0.29219  | 2670.317 | 2120.673 | 2633.343 | 2111.592 | 2036.433 | 2468.23  |
| 18241 | EIF1B     | 880.8688 | -0.16359 | 0.126417 | -1.29405 | 0.195647 | 0.285149 | 861.3752 | 1029.682 | 899.5807 | 816.9585 | 870.618  | 806.9985 |
| 16875 | RIC8A     | 3407.473 | -0.1636  | 0.108321 | -1.51032 | 0.130961 | 0.206317 | 3809.241 | 3266.954 | 3731.903 | 3138.371 | 2999.033 | 3499.339 |
| 15828 | YKT6      | 7731.789 | -0.16364 | 0.096599 | -1.69398 | 0.090269 | 0.151618 | 8426.733 | 8203.513 | 7886.811 | 7254.413 | 6671.886 | 7947.378 |
| 17282 | SMS       | 5371.786 | -0.16373 | 0.112687 | -1.45294 | 0.146241 | 0.224963 | 5231.676 | 6581.532 | 5215.202 | 5084.785 | 5033.327 | 5084.191 |
| 22215 | ZNF682    | 129.1401 | -0.16383 | 0.237516 | -0.68975 | 0.490353 | 0.586812 | 132.2691 | 136.853  | 139.1463 | 113.8385 | 141.1813 | 111.5527 |
| 15784 | AKT2      | 5328.954 | -0.16389 | 0.096143 | -1.70466 | 0.088258 | 0.148653 | 5933.677 | 5368.468 | 5599.246 | 4839.251 | 4800.164 | 5432.919 |
| 19816 | LOC103234 | 578.664  | -0.16395 | 0.155958 | -1.05124 | 0.293147 | 0.393293 | 581.1166 | 721.4888 | 532.2345 | 546.8711 | 530.4994 | 559.7736 |
| 23662 | LOC119624 | 2988.71  | -0.16395 | 0.356276 | -0.46019 | 0.64538  | 0.725051 | 3887.301 | 1778.541 | 3809.825 | 2874.98  | 2562.655 | 3018.958 |
| 25161 | ZP1       | 12.42339 | -0.16396 | 0.744007 | -0.22037 | 0.825582 | 0.872306 | 10.84173 | 14.23271 | 13.91463 | 20.08914 | 6.417332 | 9.044815 |
| 22583 | FBXO24    | 105.918  | -0.16408 | 0.261736 | -0.62689 | 0.53073  | 0.624782 | 123.5597 | 106.7453 | 104.3597 | 95.98146 | 113.3729 | 91.45313 |
| 16254 | TNRC18    | 3041.444 | -0.16427 | 0.101666 | -1.61581 | 0.106136 | 0.173595 | 3060.62  | 3324.432 | 3262.284 | 2984.354 | 2599.019 | 3017.953 |
| 19328 | PSKH1     | 1057.871 | -0.16441 | 0.145452 | -1.13032 | 0.258341 | 0.355339 | 1245.714 | 993.5524 | 1121.519 | 948.654  | 877.0354 | 1160.751 |
| 20456 | LOC103215 | 304.6291 | -0.16466 | 0.17278  | -0.95298 | 0.340599 | 0.442648 | 341.5144 | 315.8566 | 311.6877 | 285.7123 | 252.4151 | 320.5885 |
| 17311 | RRAGA     | 2385.35  | -0.16474 | 0.1139   | -1.44634 | 0.14808  | 0.227411 | 2670.317 | 2404.233 | 2496.284 | 2267.841 | 1985.095 | 2488.329 |
| 25520 | LOC119625 | 6.716495 | -0.16483 | 1.017481 | -0.162   | 0.871307 | 0.907668 | 8.131296 | 4.926706 | 7.653045 | 11.16063 | 6.417332 | 2.009959 |
| 15789 | NUDT12    | 1790.804 | -0.16484 | 0.096762 | -1.70356 | 0.088464 | 0.148953 | 1920.612 | 1889.666 | 1865.256 | 1761.148 | 1677.063 | 1631.082 |
| 19536 | MAX       | 3106.908 | -0.16487 | 0.150673 | -1.09425 | 0.273844 | 0.372633 | 2798.792 | 4187.153 | 2864.326 | 3046.853 | 2960.529 | 2783.793 |
| 18547 | RBBP8     | 3523.586 | -0.16502 | 0.132742 | -1.24314 | 0.213815 | 0.306446 | 3284.501 | 4535.307 | 3352.729 | 3415.154 | 3334.874 | 3218.949 |
| 18134 | RALA      | 3044.134 | -0.16513 | 0.125527 | -1.31552 | 0.188334 | 0.276104 | 2955.997 | 3826.956 | 2871.979 | 2874.98  | 2804.374 | 2930.52  |
| 20134 | CCDC191   | 412.9719 | -0.16515 | 0.164085 | -1.0065  | 0.314176 | 0.414839 | 426.622  | 501.9766 | 381.9565 | 377.2295 | 385.0399 | 405.0067 |
| 17053 | MICU2     | 3164.923 | -0.16517 | 0.111105 | -1.48665 | 0.137108 | 0.213746 | 3145.727 | 3779.331 | 3109.223 | 2962.033 | 3138.075 | 2855.147 |
| 19289 | TMEM42    | 835.6279 | -0.16543 | 0.1455   | -1.13697 | 0.255552 | 0.352195 | 967.6242 | 725.8681 | 956.6306 | 808.03   | 780.7754 | 774.8392 |
| 17698 | POLR2J    | 3882.139 | -0.16546 | 0.119443 | -1.38524 | 0.165981 | 0.249327 | 3655.288 | 4817.771 | 3839.741 | 3691.938 | 3645.045 | 3643.051 |
| 24995 | LOC103245 | 13.47159 | -0.16558 | 0.67282  | -0.2461  | 0.805606 | 0.856853 | 14.63633 | 14.78012 | 13.2189  | 11.16063 | 14.97377 | 12.05975 |
| 23746 | LOC103235 | 77.82231 | -0.16569 | 0.37234  | -0.445   | 0.656318 | 0.734786 | 72.09749 | 119.3358 | 56.35424 | 53.57105 | 79.14709 | 86.42823 |
| 24316 | LOC119625 | 33.06443 | -0.16573 | 0.461802 | -0.35887 | 0.719689 | 0.786846 | 27.6464  | 45.98259 | 31.30791 | 33.4819  | 27.80844 | 32.15934 |
| 16452 | ABHD13    | 1317.041 | -0.16577 | 0.104967 | -1.57923 | 0.114283 | 0.184671 | 1398.041 | 1426.555 | 1356.676 | 1236.598 | 1182.928 | 1301.448 |
| 16109 | LRRC40    | 1657.727 | -0.16587 | 0.100926 | -1.64348 | 0.100283 | 0.165499 | 1810.568 | 1656.468 | 1792.204 | 1522.311 | 1600.055 | 1564.753 |
| 20004 | CFDP1     | 5577.637 | -0.16591 | 0.161169 | -1.02944 | 0.303273 | 0.403044 | 4930.276 | 7829.084 | 4932.735 | 5428.533 | 5292.16  | 5053.037 |
| 15827 | RRM1      | 6493.537 | -0.16614 | 0.098036 | -1.69472 | 0.090128 | 0.151391 | 7106.752 | 6912.169 | 6589.968 | 6033.439 | 5623.722 | 6695.173 |
| 17322 | ANLN      | 17104.05 | -0.16628 | 0.115052 | -1.44524 | 0.148391 | 0.227746 | 16711.98 | 21250.53 | 16305.16 | 15622.66 | 16009.1  | 16724.87 |
| 20666 | ZNF674    | 323.7911 | -0.16633 | 0.179468 | -0.92678 | 0.354039 | 0.455441 | 328.5043 | 385.3779 | 313.7748 | 261.1589 | 344.3968 | 309.5337 |
| 20568 | MCRIP1    | 2416.413 | -0.16638 | 0.176538 | -0.94248 | 0.345949 | 0.447515 | 3021.047 | 1771.972 | 2876.849 | 2290.162 | 2030.016 | 2508.429 |
| 18511 | TIMMDC1   | 1116.667 | -0.16642 | 0.1332   | -1.24944 | 0.211505 | 0.303746 | 1231.078 | 1060.884 | 1250.229 | 939.7255 | 1200.041 | 1018.044 |
| 25783 | LOC119625 | 3.34329  | -0.16655 | 1.366386 | -0.12189 | 0.902986 | 0.931074 | 3.252518 | 2.189647 | 4.87012  | 4.464254 | 4.278221 | 1.004979 |
| 18137 | CD44      | 17030.59 | -0.16662 | 0.126698 | -1.31508 | 0.188482 | 0.276274 | 15693.94 | 21794.65 | 16552.84 | 15526.68 | 15660.43 | 16955.01 |
| 18930 | LOC103245 | 1390.487 | -0.16679 | 0.139155 | -1.19858 | 0.230692 | 0.32398  | 1565.545 | 1497.719 | 1342.066 | 1287.937 | 1540.16  | 1109.497 |
| 16565 | LUZP1     | 4444.761 | -0.16683 | 0.106746 | -1.56286 | 0.118085 | 0.189513 | 4528.047 | 5209.718 | 4371.976 | 4013.364 | 4030.084 | 4515.373 |
| 20917 | LOC103236 | 293.0621 | -0.16693 | 0.187747 | -0.88912 | 0.373941 | 0.47527  | 259.1173 | 359.1022 | 311.6877 | 285.7123 | 267.3888 | 275.3644 |
| 20032 | LOC119625 | 722.7225 | -0.16701 | 0.163313 | -1.02262 | 0.306486 | 0.406746 | 911.2472 | 631.7132 | 752.7813 | 602.6743 | 712.3239 | 725.5952 |
| 25012 | LOC119625 | 13.95941 | -0.16703 | 0.685073 | -0.24381 | 0.807381 | 0.858164 | 17.34676 | 9.853413 | 17.39328 | 13.39276 | 10.69555 | 15.07469 |
| 18031 | TGFB3     | 1019.648 | -0.1671  | 0.124954 | -1.33733 | 0.181114 | 0.267036 | 1036.469 | 1193.905 | 1008.81  | 897.315  | 958.3216 | 1023.069 |
| 16320 | ST7L      | 2049.402 | -0.16719 | 0.104369 | -1.60188 | 0.109183 | 0.177857 | 2074.565 | 2336.901 | 2089.281 | 1901.772 | 2040.712 | 1853.182 |
| 24478 | LOC103236 | 25.13719 | -0.16726 | 0.501506 | -0.33351 | 0.738748 | 0.802219 | 28.73058 | 23.53871 | 27.13352 | 26.78552 | 23.53022 | 21.10457 |
| 15690 | TRPC1     | 2111.635 | -0.16733 | 0.097315 | -1.71943 | 0.085537 | 0.144933 | 2340.187 | 2110.273 | 2251.387 | 1953.111 | 2030.016 | 1984.834 |
| 23971 | LOC103225 | 42.24641 | -0.1674  | 0.406881 | -0.41142 | 0.680764 | 0.755    | 39.03022 | 42.69812 | 53.57132 | 35.71403 | 34.22577 | 48.23901 |
| 16801 | IPO9      |          |          |          |          |          |          |          |          |          |          |          |          |



|       |          |          |          |          |          |          |          |          |          |          |          |          |          |
|-------|----------|----------|----------|----------|----------|----------|----------|----------|----------|----------|----------|----------|----------|
| 17197 | MTMR14   | 947.7603 | -0.16795 | 0.114393 | -1.46819 | 0.142054 | 0.219602 | 1009.365 | 1054.315 | 945.4989 | 892.8508 | 877.0354 | 907.4965 |
| 25179 | RAB33A   | 11.60202 | -0.16798 | 0.772827 | -0.21736 | 0.827928 | 0.87416  | 14.09425 | 6.568942 | 16.00182 | 8.928508 | 14.97377 | 9.044815 |
| 24358 | LOC10324 | 33.80459 | -0.16799 | 0.475994 | -0.35293 | 0.724141 | 0.790283 | 48.24569 | 29.01283 | 29.22072 | 42.41041 | 27.80844 | 26.12947 |
| 19976 | PCBP3    | 475.6301 | -0.16808 | 0.162594 | -1.03376 | 0.301248 | 0.400916 | 432.0428 | 578.0669 | 501.6223 | 412.9435 | 457.7697 | 471.3354 |
| 22506 | LOC11962 | 136.1077 | -0.16811 | 0.263308 | -0.63847 | 0.523169 | 0.617995 | 135.5216 | 181.1933 | 115.4914 | 111.6063 | 141.1813 | 131.6523 |
| 16311 | SCCPDH   | 1983.066 | -0.16813 | 0.104813 | -1.60409 | 0.108695 | 0.17716  | 2193.824 | 1907.183 | 2194.337 | 1848.201 | 1901.669 | 1853.182 |
| 23946 | LOC11962 | 48.63647 | -0.16816 | 0.404316 | -0.41592 | 0.67747  | 0.752131 | 66.13454 | 50.36189 | 66.87376 | 44.64254 | 55.61688 | 38.18922 |
| 21347 | DTNBP1   | 212.5357 | -0.16816 | 0.203858 | -0.8249  | 0.409427 | 0.509889 | 208.1612 | 261.1154 | 206.6322 | 183.0344 | 203.2155 | 213.0556 |
| 17933 | ZKSCAN1  | 4920.891 | -0.16847 | 0.124382 | -1.3545  | 0.175578 | 0.260288 | 4741.629 | 6204.913 | 4678.793 | 4656.217 | 4410.846 | 4832.946 |
| 16937 | ZSCAN25  | 1361.857 | -0.16855 | 0.112251 | -1.50153 | 0.13322  | 0.209107 | 1469.054 | 1442.978 | 1417.901 | 1272.312 | 1167.954 | 1400.941 |
| 22438 | ARHGFE19 | 161.0408 | -0.16866 | 0.259292 | -0.65048 | 0.515382 | 0.610607 | 205.4507 | 120.978  | 184.3688 | 167.4095 | 143.3204 | 144.717  |
| 26073 | LOC11962 | 1.135482 | -0.16867 | 2.24412  | -0.07516 | 0.940088 | 0.958548 | 0.542086 | 1.642235 | 1.391463 | 2.232127 | 0        | 1.004979 |
| 19980 | PRSS58   | 319.5469 | -0.16873 | 0.163313 | -1.03314 | 0.301537 | 0.401219 | 331.2148 | 316.9514 | 367.3462 | 294.6408 | 301.6146 | 305.5138 |
| 25138 | LOC11961 | 12.27017 | -0.16874 | 0.750648 | -0.22479 | 0.822143 | 0.869468 | 14.63633 | 15.32753 | 8.348776 | 11.16063 | 17.11289 | 7.034856 |
| 17916 | CEP43    | 746.5523 | -0.16875 | 0.124236 | -1.3583  | 0.174369 | 0.25874  | 814.2137 | 820.5703 | 733.9966 | 736.6019 | 684.5154 | 689.4159 |
| 18139 | BCAS3    | 876.9473 | -0.16876 | 0.128355 | -1.31482 | 0.188571 | 0.276375 | 892.8163 | 1038.988 | 851.5752 | 852.6725 | 808.5838 | 817.0483 |
| 18588 | NFKBIL1  | 830.8711 | -0.1688  | 0.1365   | -1.23661 | 0.216231 | 0.309259 | 897.695  | 781.1567 | 964.2837 | 749.9947 | 735.8541 | 856.2425 |
| 21423 | HoxA5    | 258.2517 | -0.16897 | 0.207437 | -0.81456 | 0.415324 | 0.515413 | 224.4238 | 334.4686 | 262.2907 | 243.3018 | 226.7457 | 258.2797 |
| 15949 | ITPK1    | 2471.74  | -0.16901 | 0.10081  | -1.67648 | 0.093645 | 0.156094 | 2632.371 | 2605.68  | 2618.733 | 2254.448 | 2177.615 | 2541.593 |
| 18391 | SNU13    | 6711.637 | -0.16924 | 0.133651 | -1.26626 | 0.205419 | 0.296958 | 7771.35  | 5616.445 | 7929.25  | 6466.472 | 5899.667 | 6586.635 |
| 17332 | DNAJB6   | 2968.733 | -0.16935 | 0.117316 | -1.44355 | 0.148866 | 0.228351 | 2797.708 | 3632.625 | 2997.906 | 2810.248 | 2768.009 | 2805.903 |
| 19065 | LOC10324 | 470.1209 | -0.16937 | 0.144161 | -1.17485 | 0.240054 | 0.334736 | 497.6353 | 528.7998 | 466.8357 | 466.5145 | 410.7092 | 450.2308 |
| 15850 | REXO2    | 2459.814 | -0.16938 | 0.100149 | -1.69129 | 0.090782 | 0.152268 | 2479.503 | 2821.908 | 2508.807 | 2374.983 | 2297.405 | 2276.278 |
| 16289 | LOC10322 | 4765.357 | -0.16939 | 0.105294 | -1.60872 | 0.107678 | 0.17574  | 5186.682 | 4790.948 | 5165.805 | 4359.344 | 4083.562 | 5005.803 |
| 18977 | LOC10321 | 864.337  | -0.16948 | 0.142524 | -1.18914 | 0.234385 | 0.328341 | 852.7019 | 1062.526 | 827.2246 | 790.173  | 885.5918 | 767.8043 |
| 18052 | DDX49    | 1911.203 | -0.1695  | 0.127079 | -1.33383 | 0.182259 | 0.268411 | 2238.817 | 1716.136 | 2119.198 | 1752.22  | 1711.289 | 1929.561 |
| 23949 | LNP1     | 39.14518 | -0.16954 | 0.407892 | -0.41564 | 0.677675 | 0.752265 | 41.19856 | 44.88777 | 38.96096 | 31.24978 | 36.36488 | 42.20914 |
| 20446 | CTU2     | 443.6164 | -0.16986 | 0.177833 | -0.95517 | 0.339492 | 0.441426 | 499.2615 | 418.2226 | 493.9693 | 470.9788 | 323.0057 | 456.2607 |
| 25780 | DAPL1    | 2.974258 | -0.16989 | 1.389289 | -0.12228 | 0.902674 | 0.93086  | 2.710432 | 3.831883 | 2.782925 | 2.232127 | 4.278221 | 2.009959 |
| 15302 | G3BP1    | 18075.93 | -0.16992 | 0.095511 | -1.77907 | 0.075228 | 0.130697 | 18823.95 | 20368.65 | 18233.03 | 16336.94 | 16148.15 | 18544.89 |
| 21647 | FBXO15   | 164.7105 | -0.16993 | 0.216935 | -0.78333 | 0.433433 | 0.532418 | 190.2723 | 156.5598 | 175.3243 | 169.6417 | 149.7377 | 146.727  |
| 17342 | CDC34    | 1258.207 | -0.17012 | 0.118121 | -1.44023 | 0.149802 | 0.229644 | 1412.135 | 1193.905 | 1394.246 | 1149.545 | 1157.259 | 1242.155 |
| 24833 | SOX3     | 20.26834 | -0.17013 | 0.616451 | -0.27599 | 0.782559 | 0.83777  | 17.88885 | 16.96977 | 28.52499 | 26.78552 | 21.39111 | 10.04979 |
| 17939 | FTF2H4   | 1178.403 | -0.17014 | 0.12575  | -1.35302 | 0.176049 | 0.260899 | 1311.307 | 1203.211 | 1235.619 | 1091.51  | 977.5736 | 1251.199 |
| 15589 | FAF1     | 3690.763 | -0.17019 | 0.098302 | -1.73132 | 0.083395 | 0.142211 | 3774.005 | 4264.885 | 3685.985 | 3544.618 | 3362.682 | 3512.403 |
| 21899 | ZNF829   | 148.9631 | -0.17027 | 0.228715 | -0.74446 | 0.456599 | 0.554303 | 166.9626 | 154.9175 | 153.7566 | 118.3027 | 139.0422 | 160.7967 |
| 16837 | LOC10322 | 943.7479 | -0.17041 | 0.112258 | -1.51801 | 0.129011 | 0.203691 | 994.7285 | 1011.617 | 994.8959 | 841.5119 | 894.1483 | 925.5861 |
| 23607 | LOC10322 | 67.02871 | -0.17042 | 0.364621 | -0.46738 | 0.640231 | 0.720943 | 96.49137 | 50.36189 | 66.09448 | 71.42806 | 53.47777 | 64.31869 |
| 19105 | GRB7     | 952.2883 | -0.17045 | 0.145824 | -1.1689  | 0.242445 | 0.337367 | 1105.856 | 859.4365 | 1064.469 | 779.0123 | 924.0958 | 980.86   |
| 24613 | LOC11962 | 22.53763 | -0.17046 | 0.542146 | -0.31442 | 0.753202 | 0.813549 | 27.10432 | 26.82318 | 17.39328 | 24.5534  | 19.252   | 20.09959 |
| 23441 | LOC11961 | 61.82772 | -0.1705  | 0.345485 | -0.49351 | 0.621653 | 0.705032 | 56.91907 | 77.18507 | 61.22436 | 55.80317 | 70.59065 | 49.24399 |
| 20272 | LOC11962 | 260.2448 | -0.17055 | 0.173315 | -0.98402 | 0.325104 | 0.426346 | 288.3899 | 260.0206 | 278.9883 | 238.8376 | 245.9977 | 249.2349 |
| 17143 | TMEM167  | 2532.583 | -0.1707  | 0.115819 | -1.47387 | 0.140516 | 0.217909 | 2893.115 | 2336.354 | 2813.538 | 2508.911 | 2406.5   | 2237.084 |
| 17696 | ZFP91    | 5911.366 | -0.1712  | 0.123565 | -1.38551 | 0.165897 | 0.249216 | 5707.085 | 7500.637 | 5577.678 | 5484.336 | 5542.436 | 5656.024 |
| 17272 | GOLM1    | 3927.349 | -0.17126 | 0.117761 | -1.45429 | 0.145867 | 0.224518 | 3897.601 | 4773.978 | 3813.304 | 3633.903 | 3452.525 | 3992.783 |
| 23244 | LOC10323 | 62.53791 | -0.17131 | 0.327712 | -0.52274 | 0.601155 | 0.687503 | 65.05036 | 72.80577 | 61.22436 | 62.49956 | 51.33866 | 62.30873 |
| 14943 | YIPF5    | 3609.389 | -0.17136 | 0.092797 | -1.84662 | 0.064802 | 0.115289 | 3693.234 | 4073.839 | 3701.291 | 3348.19  | 3510.281 | 3329.497 |
| 16149 | DNAJA2   | 4877.867 | -0.17142 | 0.104683 | -1.6375  | 0.101526 | 0.167135 | 4900.461 | 5803.66  | 4798.459 | 4674.074 | 4419.403 | 4671.145 |
| 25778 | LOC11962 | 3.428503 | -0.17148 | 1.400179 | -0.12247 | 0.902525 | 0.930772 | 3.252518 | 2.737059 | 4.87012  | 6.696381 | 0        | 3.014938 |
| 16319 | PFDN1    | 3860.715 | -0.1715  | 0.107057 | -1.60195 | 0.109166 | 0.177841 | 3852.088 | 4587.858 | 3832.088 | 3459.797 | 3647.184 | 3784.753 |
| 19745 | PHF21A   | 960.7399 | -0.17151 | 0.161623 | -1.06116 | 0.288619 | 0.388602 | 900.9475 | 1276.564 | 874.5343 | 868.2974 | 964.7389 | 879.357  |
| 16858 | OGDHL    | 6800.294 | -0.17151 | 0.113331 | -1.51334 | 0.130193 | 0.205313 | 7660.222 | 6573.321 | 7387.971 | 5979.868 | 5925.337 | 7275.046 |
| 18013 | ELOB     | 2648.922 | -0.1716  | 0.127953 | -1.34116 | 0.17987  | 0.265488 | 2876.31  | 2342.375 | 3198.277 | 2491.054 | 2626.828 | 2358.687 |
| 17960 | LCOR     | 4317.217 | -0.17173 | 0.127277 | -1.34926 | 0.177254 | 0.262378 | 4075.405 | 5479.045 | 4169.518 | 3995.507 | 3899.599 | 4284.227 |
| 24227 | LOC10324 | 32.64123 | -0.17178 | 0.463881 | -0.3703  | 0.171157 | 0.780341 | 33.60935 | 43.79295 | 25.74206 | 33.4819  | 32.08666 | 27.13445 |
| 18017 | RITA1    | 957.9453 | -0.17184 | 0.12818  | -1.3406  | 0.180052 | 0.265676 | 1047.853 | 983.699  | 1019.246 | 899.5472 | 789.3318 | 1007.994 |
| 18034 | MFS08    | 1173.676 | -0.17201 | 0.128665 | -1.33692 | 0.18125  | 0.267184 | 1383.404 | 1068     | 1279.45  | 1109.367 | 1097.364 | 1104.472 |
| 25094 | LOC11961 | 14.92672 | -0.17234 | 0.743832 | -0.23169 | 0.816778 | 0.865308 | 17.34676 | 16.42235 | 12.52316 | 17.85702 | 21.39111 | 4.019918 |
| 17406 | GLRX3    | 4194.974 | -0.17236 | 0.120643 | -1.42866 | 0.153101 | 0.233839 | 4687.963 | 3707.073 | 4940.388 | 3872.74  | 4098.536 | 3863.141 |
| 15075 | NUP133   | 6098.981 | -0.17238 | 0.094677 | -1.82071 | 0.068652 | 0.121068 | 6581.471 | 6460.554 | 6354.81  | 5640.585 | 5309.273 | 6246.952 |
| 18560 | POLR3F   | 1049.741 | -0.17239 | 0.138837 | -1.24166 | 0.214361 | 0.307046 | 1005.57  | 1303.935 | 1025.508 | 964.2789 | 1056.721 | 942.6707 |
| 13620 | TALDO1   | 14130.23 | -0.1724  | 0.082676 | -2.08519 | 0.037052 | 0.072322 | 15188.18 | 14694.18 | 15041.71 | 13618.21 | 12535.19 | 13703.9  |
| 14914 | DDX54    | 5126.26  | -0.17242 | 0.093133 | -1.85131 | 0.064125 | 0.114306 | 5369.365 | 5497.657 | 5437.836 | 4712.02  | 4517.802 | 5222.878 |
| 25631 | LOC10324 | 4.809154 | -0.17245 | 1.186769 | -0.14531 | 0.884464 | 0.917384 | 4.336691 | 4.926706 | 5.565851 | 4.464254 | 8.556443 | 1.004979 |
| 19997 | CCDC66   | 2384.571 | -0.17255 | 0.167497 | -1.03014 | 0.302943 | 0.402736 | 2104.921 | 3363.298 | 2111.545 | 2225.431 | 2312.379 | 2189.85  |
| 24744 | LOC11962 | 21.07909 | -0.17257 | 0.593944 | -0.29055 | 0.771397 | 0.828723 | 24.39389 | 29.01283 | 13.2189  | 26.78552 | 14.97377 | 18.08963 |
| 25129 | LOC11962 | 11.19983 | -0.17265 | 0.761321 | -0.22677 | 0.820601 | 0.868147 | 13.01007 | 11.49565 | 10.43597 | 13.39276 | 12.83466 | 6.029877 |
| 23292 | LOC10323 | 68.86789 | -0.17266 | 0.335246 | -0.51503 | 0.606534 | 0.692285 | 86.73382 | 54.19377 | 77.92191 | 64.73168 | 66.31243 | 63.31371 |
| 21464 | LOC11962 | 720.5376 | -0.17279 | 0.213756 | -0.80834 | 0.418893 | 0.518835 | 548.0493 | 1072.38  | 670.685  | 627.2277 | 714.463  | 690.4209 |
| 19724 | SDHAF4   | 680.8376 | -0.17291 | 0.162383 | -1.06483 | 0.286955 | 0.386773 | 778.9781 | 566.5712 | 818.8758 | 645.0847 | 652.4288 | 623.0873 |
| 14997 | ECI2     | 3328.918 | -0.17    |          |          |          |          |          |          |          |          |          |          |



|       |           |          |          |          |          |          |          |          |          |          |          |          |          |
|-------|-----------|----------|----------|----------|----------|----------|----------|----------|----------|----------|----------|----------|----------|
| 23389 | LOC119620 | 176.8664 | -0.1737  | 0.34708  | -0.50045 | 0.616756 | 0.701033 | 250.4439 | 90.32295 | 224.0255 | 129.4634 | 151.8769 | 215.0656 |
| 21964 | TMEM143   | 175.2276 | -0.1737  | 0.236833 | -0.73343 | 0.463296 | 0.560733 | 182.141  | 210.7535 | 167.6713 | 127.2312 | 162.5724 | 200.9959 |
| 22975 | LOC103237 | 70.91734 | -0.17372 | 0.305583 | -0.56847 | 0.569714 | 0.659256 | 74.80792 | 72.25836 | 79.31338 | 64.73168 | 62.03421 | 72.35852 |
| 17138 | EIF4ENIF1 | 1782.552 | -0.17374 | 0.117826 | -1.4745  | 0.140346 | 0.217709 | 1839.841 | 2084.544 | 1749.764 | 1649.542 | 1546.577 | 1825.043 |
| 19038 | SMIM30    | 1158.777 | -0.17389 | 0.147563 | -1.17838 | 0.238644 | 0.333247 | 1266.314 | 1007.238 | 1408.856 | 1118.296 | 1170.094 | 981.8649 |
| 18581 | ARHGEF10  | 1397.826 | -0.17396 | 0.140533 | -1.23788 | 0.21576  | 0.308701 | 1407.798 | 1636.761 | 1408.856 | 1104.903 | 1292.023 | 1536.614 |
| 16223 | GOPC      | 3163.29  | -0.17406 | 0.107227 | -1.62329 | 0.104527 | 0.17129  | 3211.32  | 3732.801 | 3121.051 | 2848.194 | 2934.86  | 3131.516 |
| 17846 | FBXO9     | 3831.744 | -0.17412 | 0.127161 | -1.36925 | 0.170921 | 0.254607 | 4458.66  | 3298.704 | 4432.505 | 3618.278 | 3491.029 | 3691.29  |
| 16827 | GTF3C5    | 1073.391 | -0.17425 | 0.114618 | -1.52023 | 0.128454 | 0.202944 | 1124.287 | 1172.009 | 1123.606 | 970.9752 | 954.0434 | 1095.428 |
| 20623 | ZNF577    | 340.5059 | -0.17443 | 0.186989 | -0.93284 | 0.3509   | 0.452344 | 333.3831 | 434.0976 | 313.0791 | 343.7476 | 327.2839 | 291.444  |
| 15905 | LMAN1     | 16652.87 | -0.17446 | 0.103624 | -1.68356 | 0.092267 | 0.154223 | 16722.28 | 19962.47 | 16294.03 | 15321.32 | 15204.8  | 16412.32 |
| 24264 | CCL28     | 30.79742 | -0.17466 | 0.476334 | -0.36667 | 0.713865 | 0.782151 | 31.44101 | 30.65506 | 36.17803 | 17.85702 | 38.50399 | 30.14938 |
| 14636 | IFNAR1    | 5571.523 | -0.17481 | 0.09201  | -1.8999  | 0.057446 | 0.104346 | 5902.236 | 6034.12  | 5795.442 | 5303.534 | 4832.251 | 5561.556 |
| 22703 | LOC119624 | 84.27803 | -0.1749  | 0.287593 | -0.60816 | 0.54308  | 0.635914 | 95.4072  | 78.27989 | 93.92374 | 78.12444 | 85.56443 | 74.36848 |
| 16597 | LOC103237 | 883.3733 | -0.17513 | 0.112429 | -1.55767 | 0.119312 | 0.191113 | 944.3145 | 914.1777 | 953.8477 | 821.4227 | 819.2794 | 847.1977 |
| 23743 | PNLDC1    | 50.62003 | -0.17535 | 0.393123 | -0.44603 | 0.655574 | 0.734045 | 64.50828 | 44.34036 | 50.78839 | 46.87467 | 62.03421 | 35.17428 |
| 16982 | CNOT2     | 4573.451 | -0.17541 | 0.117336 | -1.49494 | 0.134931 | 0.211195 | 4547.02  | 5660.786 | 4346.93  | 4160.685 | 4295.334 | 4429.95  |
| 19239 | CHD1      | 7096.066 | -0.17542 | 0.152986 | -1.14662 | 0.251538 | 0.347582 | 6480.1   | 9811.262 | 6288.716 | 6569.15  | 6785.259 | 6641.909 |
| 15183 | ZDHHC3    | 3952.716 | -0.17561 | 0.097597 | -1.79934 | 0.071965 | 0.126008 | 4167.56  | 4375.463 | 4042.895 | 3642.831 | 3469.638 | 4017.908 |
| 18150 | MRPL50    | 718.245  | -0.17569 | 0.133843 | -1.31263 | 0.189306 | 0.277284 | 784.399  | 693.5708 | 804.9612 | 738.834  | 654.5679 | 633.1371 |
| 19233 | GLIPR2    | 394.6322 | -0.17569 | 0.153062 | -1.14784 | 0.251036 | 0.346997 | 424.9957 | 441.2139 | 391.6968 | 370.5331 | 344.3968 | 394.9569 |
| 15361 | NME4      | 2476.593 | -0.1757  | 0.099434 | -1.767   | 0.077228 | 0.133658 | 2505.523 | 2846.541 | 2528.288 | 2323.644 | 2355.161 | 2300.398 |
| 13793 | CDC42     | 4072.175 | -0.17574 | 0.085822 | -2.04769 | 0.04059  | 0.078234 | 4215.264 | 4431.846 | 4312.839 | 3921.847 | 3709.218 | 3842.037 |
| 17859 | ZNF608    | 2303.283 | -0.17574 | 0.12847  | -1.36794 | 0.171331 | 0.255048 | 2186.234 | 2906.757 | 2238.168 | 2104.896 | 2162.641 | 2221.005 |
| 17055 | LOC103227 | 5164.977 | -0.17575 | 0.118234 | -1.48644 | 0.137162 | 0.213806 | 5133.016 | 6305.089 | 5004.396 | 4727.645 | 4528.497 | 5291.217 |
| 15853 | ACOT9     | 2018.178 | -0.17581 | 0.103968 | -1.69102 | 0.090834 | 0.152326 | 2238.817 | 1954.26  | 2231.906 | 1890.612 | 1858.887 | 1934.585 |
| 21105 | TIGD1     | 217.6996 | -0.17583 | 0.203398 | -0.86449 | 0.387322 | 0.487891 | 196.2353 | 251.8094 | 246.2889 | 209.8199 | 183.9635 | 218.0805 |
| 22267 | LOC119620 | 124.5515 | -0.17588 | 0.258852 | -0.67946 | 0.496846 | 0.593198 | 136.0637 | 123.7151 | 133.5804 | 136.1597 | 128.3466 | 89.44317 |
| 15770 | CISD1     | 2378.328 | -0.17592 | 0.103055 | -1.70703 | 0.087816 | 0.148039 | 2481.129 | 2726.111 | 2359.225 | 2194.181 | 2346.604 | 2162.716 |
| 25903 | LOC119615 | 2.236408 | -0.17599 | 1.687034 | -0.10432 | 0.916918 | 0.941068 | 3.252518 | 1.094824 | 2.782925 | 0        | 4.278221 | 2.009959 |
| 16366 | POLR2C    | 3381.403 | -0.17601 | 0.110393 | -1.59437 | 0.110853 | 0.180069 | 3912.237 | 3214.402 | 3635.196 | 3401.762 | 2954.112 | 3170.71  |
| 22361 | LOC103247 | 102.716  | -0.17602 | 0.264796 | -0.66473 | 0.506222 | 0.601847 | 100.8281 | 112.2194 | 114.0999 | 109.3742 | 81.28621 | 98.48799 |
| 18431 | PSMB4     | 8146.726 | -0.17603 | 0.139735 | -1.25973 | 0.207768 | 0.299686 | 9998.241 | 6657.075 | 9276.882 | 7426.286 | 7439.827 | 8082.045 |
| 20356 | KAT6B     | 587.8185 | -0.17606 | 0.181818 | -0.96832 | 0.332884 | 0.434748 | 562.6857 | 797.0316 | 509.9711 | 587.0494 | 530.4994 | 539.674  |
| 14456 | SECISBP2  | 2419.328 | -0.17618 | 0.091145 | -1.93299 | 0.053238 | 0.097905 | 2546.722 | 2599.111 | 2558.204 | 2261.145 | 2201.145 | 2349.642 |
| 19579 | LOC103215 | 444.0717 | -0.17634 | 0.162133 | -1.08762 | 0.276762 | 0.375797 | 428.7903 | 548.5066 | 434.8321 | 439.729  | 408.5701 | 404.0017 |
| 17214 | SERPINF2  | 2219.707 | -0.17647 | 0.120407 | -1.46561 | 0.142756 | 0.220474 | 2502.271 | 2102.609 | 2467.759 | 2040.164 | 1890.974 | 2314.468 |
| 21496 | LOC103227 | 208.2887 | -0.17652 | 0.219573 | -0.80394 | 0.421433 | 0.521203 | 269.959  | 182.2881 | 211.5023 | 183.0344 | 198.9373 | 204.0108 |
| 15103 | CTTN      | 11613.09 | -0.17656 | 0.097372 | -1.81324 | 0.069794 | 0.122847 | 12336.8  | 12789.18 | 11851.78 | 10424.03 | 10209.98 | 12066.79 |
| 15813 | LOC119627 | 1320.385 | -0.17678 | 0.104065 | -1.69878 | 0.089361 | 0.150225 | 1344.374 | 1459.4   | 1398.42  | 1270.08  | 1229.989 | 1220.045 |
| 15369 | LOC103227 | 3363.084 | -0.17691 | 0.10019  | -1.76577 | 0.077435 | 0.133945 | 3752.864 | 3366.035 | 3591.365 | 3283.459 | 2898.495 | 3286.283 |
| 23805 | LOC103227 | 50.55927 | -0.17711 | 0.406532 | -0.43567 | 0.663074 | 0.740509 | 51.49821 | 61.31012 | 46.614   | 40.17829 | 70.59065 | 33.16432 |
| 24386 | LOC119627 | 54.28571 | -0.17727 | 0.508508 | -0.34861 | 0.727386 | 0.79301  | 85.64965 | 18.612   | 68.87741 | 49.10679 | 49.19955 | 54.26889 |
| 18353 | LRRFIP2   | 3454.716 | -0.17728 | 0.139288 | -1.27276 | 0.203102 | 0.2942   | 3239.508 | 4545.708 | 3215.67  | 3109.353 | 3283.535 | 3334.522 |
| 15597 | AP1G1     | 4358.286 | -0.17733 | 0.102508 | -1.7299  | 0.083648 | 0.142578 | 4534.552 | 5086.551 | 4259.963 | 3968.722 | 3991.581 | 4308.347 |
| 24616 | LOC103247 | 21.17752 | -0.17742 | 0.565853 | -0.31355 | 0.753866 | 0.814167 | 27.6464  | 23.53871 | 16.69755 | 20.08914 | 14.97377 | 24.11951 |
| 16541 | NSUN4     | 1185.101 | -0.17743 | 0.113228 | -1.56702 | 0.117111 | 0.188223 | 1241.378 | 1333.495 | 1202.224 | 1116.063 | 1039.608 | 1177.836 |
| 17309 | DPP3      | 2144.458 | -0.17749 | 0.122667 | -1.44689 | 0.147927 | 0.227202 | 2505.523 | 2054.437 | 2275.737 | 1892.844 | 1876     | 2262.209 |
| 18442 | NARF      | 671.5888 | -0.17754 | 0.141133 | -1.25796 | 0.208407 | 0.300428 | 786.0252 | 637.7348 | 717.9948 | 578.1209 | 635.3159 | 674.3412 |
| 17409 | ADK       | 2140.151 | -0.17766 | 0.124373 | -1.42844 | 0.153166 | 0.233904 | 2080.527 | 2651.115 | 2082.324 | 1939.718 | 2113.441 | 1973.78  |
| 24040 | ADAMTS15  | 34.62108 | -0.17769 | 0.443291 | -0.40084 | 0.688537 | 0.76143  | 43.909   | 29.56024 | 36.17803 | 35.71403 | 34.22577 | 28.13943 |
| 18146 | SGCB      | 1473.086 | -0.17771 | 0.135316 | -1.31327 | 0.189093 | 0.277026 | 1432.192 | 1838.756 | 1422.075 | 1426.329 | 1259.936 | 1459.23  |
| 20421 | LOC103237 | 263.0678 | -0.17771 | 0.18542  | -0.95843 | 0.337844 | 0.439828 | 275.3799 | 306.5506 | 254.6377 | 225.4448 | 280.2235 | 236.1702 |
| 19400 | MICOS10   | 1230.959 | -0.17773 | 0.159037 | -1.11753 | 0.263767 | 0.361437 | 1505.374 | 995.7421 | 1421.379 | 1151.778 | 1082.39  | 1229.09  |
| 17704 | MTFMT     | 666.5751 | -0.17783 | 0.128541 | -1.38349 | 0.166515 | 0.250038 | 762.1734 | 678.2432 | 680.4253 | 636.1562 | 637.455  | 604.9976 |
| 14640 | ENC1      | 3511.667 | -0.1779  | 0.093691 | -1.89882 | 0.057587 | 0.104574 | 3755.032 | 3753.603 | 3679.723 | 3370.512 | 3043.954 | 3467.179 |
| 14572 | ERLIN1    | 3068.13  | -0.17834 | 0.093296 | -1.91157 | 0.055932 | 0.102042 | 3300.764 | 3138.312 | 3338.815 | 2863.819 | 2738.062 | 3029.008 |
| 18876 | MCTS1     | 1159.278 | -0.17843 | 0.147812 | -1.20713 | 0.227382 | 0.320246 | 1356.842 | 979.3197 | 1354.589 | 1133.921 | 1105.92  | 1025.079 |
| 21529 | TRAF3IP1  | 779.4258 | -0.17855 | 0.22313  | -0.80021 | 0.423587 | 0.523064 | 655.9245 | 1213.065 | 613.6351 | 689.7272 | 761.5234 | 742.6798 |
| 19315 | POLR3H    | 1201.769 | -0.17856 | 0.157685 | -1.13236 | 0.257482 | 0.354432 | 1472.307 | 982.6042 | 1376.157 | 1095.974 | 1069.555 | 1214.015 |
| 20298 | ZNF184    | 416.9408 | -0.17856 | 0.182519 | -0.97829 | 0.327929 | 0.42947  | 385.4234 | 544.6748 | 398.6541 | 354.9082 | 414.9875 | 402.9968 |
| 21449 | LOC119627 | 159.9823 | -0.17861 | 0.22013  | -0.81138 | 0.41715  | 0.517037 | 179.4306 | 181.7407 | 148.8865 | 154.0168 | 139.0422 | 156.7768 |
| 23888 | LOC119615 | 53.6515  | -0.17865 | 0.421221 | -0.42413 | 0.671469 | 0.747255 | 42.28274 | 66.78424 | 59.8329  | 73.66019 | 49.19955 | 30.14938 |
| 15236 | TRAPPC12  | 1798.098 | -0.17878 | 0.099909 | -1.78947 | 0.073539 | 0.128314 | 1863.151 | 2025.971 | 1840.209 | 1680.792 | 1659.95  | 1718.515 |
| 19274 | BCL9      | 1062.221 | -0.17887 | 0.15689  | -1.14007 | 0.254258 | 0.350703 | 964.9137 | 1409.585 | 1008.81  | 973.2074 | 1028.912 | 987.8948 |
| 16022 | PTPN1     | 3576.772 | -0.1789  | 0.107652 | -1.6618  | 0.096553 | 0.160209 | 3581.023 | 4257.222 | 3559.362 | 3352.655 | 3197.97  | 3512.403 |
| 24973 | ATPGV1FN  | 16.06445 | -0.17893 | 0.711927 | -0.25133 | 0.801563 | 0.853303 | 17.34676 | 15.32753 | 17.39328 | 15.62489 | 25.66933 | 5.024897 |
| 21361 | MRPL52    | 737.2002 | -0.17901 | 0.217646 | -0.82247 | 0.410811 | 0.511278 | 969.7925 | 481.175  | 898.1892 | 700.8879 | 671.6807 | 701.4757 |
| 25399 | LOC119627 | 6.056673 | -0.17911 | 0.985971 | -0.18166 | 0.855852 | 0.895816 | 6.505036 | 6.568942 | 6.261582 | 6.696381 | 4.278221 | 6.029877 |
| 17548 | LOC103247 | 8369.627 | -0.17915 | 0.127221 | -1.40818 | 0.159079 | 0.241003 | 7896.572 | 10775.25 | 7993.953 | 7551.286 | 8096.534 | 7904.164 |
| 15077 | NENF      | 2398.075 |          |          |          |          |          |          |          |          |          |          |          |



|       |           |          |          |          |          |          |          |          |          |          |          |          |          |
|-------|-----------|----------|----------|----------|----------|----------|----------|----------|----------|----------|----------|----------|----------|
| 15264 | APPBP2    | 9669.152 | -0.17948 | 0.100515 | -1.78556 | 0.07417  | 0.12918  | 9832.905 | 11468.82 | 9509.952 | 8745.474 | 9093.359 | 9364.399 |
| 26047 | LOC119621 | 1.462314 | -0.17949 | 2.294958 | -0.07821 | 0.937659 | 0.957027 | 3.252518 | 0.547412 | 0.695731 | 0        | 4.278221 | 0        |
| 18886 | LOC103241 | 469.3132 | -0.1795  | 0.148804 | -1.20627 | 0.227715 | 0.320559 | 483.541  | 468.5845 | 540.5833 | 446.4254 | 472.7435 | 404.0017 |
| 14941 | RHOA      | 17690.7  | -0.17972 | 0.097299 | -1.84706 | 0.064739 | 0.115205 | 17628.65 | 20968.06 | 17775.94 | 16950.77 | 16248.68 | 16572.11 |
| 19616 | CBLL1     | 935.845  | -0.1799  | 0.166043 | -1.08345 | 0.278607 | 0.377589 | 821.8029 | 1262.332 | 898.8849 | 852.6725 | 874.8963 | 904.4815 |
| 15886 | MSANTD2   | 1503.14  | -0.17994 | 0.106668 | -1.68693 | 0.091617 | 0.153319 | 1591.566 | 1698.071 | 1503.475 | 1368.294 | 1386.144 | 1471.29  |
| 23578 | LOC103231 | 48.02653 | -0.17996 | 0.380906 | -0.47244 | 0.366613 | 0.717803 | 41.19856 | 56.93083 | 54.96278 | 51.33892 | 38.50399 | 45.22408 |
| 21514 | DOHH      | 287.7391 | -0.17999 | 0.224426 | -0.80198 | 0.422564 | 0.522165 | 353.9824 | 212.3958 | 351.3443 | 276.7837 | 254.5542 | 277.3743 |
| 16761 | TMEM199   | 2243.158 | -0.1802  | 0.117678 | -1.53133 | 0.125688 | 0.199357 | 2514.197 | 2048.962 | 2588.816 | 2066.95  | 2064.242 | 2175.781 |
| 15644 | PIAS2     | 2355.839 | -0.18025 | 0.104435 | -1.72594 | 0.084358 | 0.143355 | 2417.705 | 2755.671 | 2334.874 | 2185.252 | 2222.536 | 2218.995 |
| 16853 | DAAM2     | 1444.713 | -0.18048 | 0.119136 | -1.51492 | 0.129793 | 0.204744 | 1501.037 | 1658.11  | 1449.904 | 1388.383 | 1208.598 | 1462.245 |
| 21975 | LOC119624 | 209.4899 | -0.18053 | 0.246702 | -0.73176 | 0.464318 | 0.561699 | 181.5989 | 299.4343 | 187.1517 | 174.1059 | 209.6328 | 205.0158 |
| 16501 | DHX35     | 1300.005 | -0.18055 | 0.114613 | -1.57526 | 0.115197 | 0.185595 | 1457.128 | 1300.103 | 1392.158 | 1174.099 | 1152.981 | 1323.558 |
| 18950 | NSUN3     | 493.4077 | -0.18056 | 0.151148 | -1.19457 | 0.232253 | 0.325829 | 576.7799 | 469.1319 | 523.8857 | 484.3716 | 479.1608 | 427.1163 |
| 13703 | AAGAB     | 3140.453 | -0.1806  | 0.087342 | -2.06772 | 0.038667 | 0.075017 | 3354.973 | 3385.195 | 3270.633 | 3002.211 | 2859.991 | 2969.714 |
| 22637 | BAMBI     | 81.77069 | -0.18062 | 0.292354 | -0.61782 | 0.536693 | 0.630295 | 82.93921 | 88.1333  | 91.14081 | 73.66019 | 66.31243 | 88.43819 |
| 16550 | CEBPZ     | 3818.374 | -0.18068 | 0.11539  | -1.56586 | 0.117382 | 0.188555 | 3792.978 | 4704.457 | 3672.766 | 3551.314 | 3647.184 | 3541.548 |
| 14912 | MED20     | 1796.672 | -0.18076 | 0.097615 | -1.85177 | 0.064058 | 0.114202 | 1947.716 | 1926.89  | 1855.516 | 1607.131 | 1721.984 | 1722.535 |
| 21457 | NACA2     | 204.9731 | -0.18091 | 0.223304 | -0.81016 | 0.417846 | 0.517727 | 192.4407 | 238.1241 | 226.1127 | 196.4272 | 147.5986 | 229.1353 |
| 21503 | CUNH17or  | 160.6102 | -0.18108 | 0.225511 | -0.80298 | 0.421985 | 0.521717 | 180.5148 | 153.2753 | 176.7158 | 178.5702 | 136.9031 | 137.6822 |
| 24130 | LOC119625 | 30.42327 | -0.18111 | 0.470199 | -0.38517 | 0.700114 | 0.771321 | 33.06727 | 36.67659 | 26.43779 | 29.01765 | 34.22577 | 23.11453 |
| 24950 | LOC119625 | 12.73718 | -0.18115 | 0.711434 | -0.25463 | 0.799006 | 0.851366 | 13.01007 | 15.87494 | 11.1317  | 13.39276 | 14.97377 | 8.039836 |
| 16898 | GCF2C     | 1671.818 | -0.18118 | 0.120244 | -1.50679 | 0.131864 | 0.207445 | 1657.158 | 2026.519 | 1644.013 | 1553.56  | 1632.141 | 1517.519 |
| 13788 | COP53     | 3050.343 | -0.1813  | 0.088504 | -2.0485  | 0.040511 | 0.07811  | 3171.747 | 3197.432 | 3354.817 | 2852.658 | 2913.469 | 2811.933 |
| 13567 | COPZ1     | 3193.322 | -0.18135 | 0.086535 | -2.09564 | 0.036114 | 0.070767 | 3465.016 | 3335.38  | 3382.646 | 2941.943 | 2996.894 | 3038.053 |
| 15339 | AMMECR1   | 2334.644 | -0.18136 | 0.102306 | -1.77268 | 0.076282 | 0.132214 | 2542.385 | 2565.172 | 2341.832 | 2091.503 | 2111.302 | 2355.672 |
| 16382 | JMJD8     | 2490.937 | -0.18139 | 0.113974 | -1.59151 | 0.111496 | 0.180938 | 2775.482 | 2461.711 | 2712.657 | 2274.537 | 2111.302 | 2609.932 |
| 21358 | ATAT1     | 310.4137 | -0.18141 | 0.220399 | -0.8231  | 0.41045  | 0.5109   | 277.5482 | 440.6665 | 271.3352 | 305.8014 | 271.6671 | 295.464  |
| 25048 | LOC119618 | 12.57037 | -0.18143 | 0.762688 | -0.23789 | 0.811969 | 0.861803 | 14.63633 | 7.116354 | 18.78475 | 13.39276 | 6.417332 | 15.07469 |
| 14224 | GPATCH2L  | 4816.902 | -0.18179 | 0.092158 | -1.97254 | 0.048548 | 0.090738 | 5217.581 | 5373.394 | 4770.63  | 4555.771 | 4353.09  | 4630.945 |
| 21151 | LOC103220 | 432.6376 | -0.18185 | 0.211894 | -0.85821 | 0.390774 | 0.49117  | 549.6756 | 324.0678 | 506.4924 | 453.1218 | 344.3968 | 418.0715 |
| 24901 | LOC103221 | 19.73614 | -0.18194 | 0.686819 | -0.2649  | 0.791087 | 0.844586 | 33.06727 | 8.211177 | 21.56767 | 26.78552 | 10.69555 | 18.08963 |
| 18188 | ZNF331    | 800.3877 | -0.18196 | 0.139619 | -1.30322 | 0.192499 | 0.281371 | 792.5303 | 985.8887 | 774.349  | 720.977  | 765.8016 | 762.7794 |
| 23702 | LOC103224 | 50.88604 | -0.18198 | 0.401522 | -0.45322 | 0.65039  | 0.729501 | 42.28274 | 75.54283 | 43.83108 | 49.10679 | 51.33866 | 43.21412 |
| 25511 | LOC119623 | 4.890816 | -0.18201 | 1.119742 | -0.16255 | 0.870876 | 0.907376 | 6.505036 | 3.284471 | 5.565851 | 6.696381 | 4.278221 | 3.014938 |
| 24015 | LOC119625 | 42.14061 | -0.18217 | 0.450655 | -0.40423 | 0.686042 | 0.759459 | 35.23561 | 60.76271 | 36.87376 | 44.64254 | 49.19955 | 26.12947 |
| 15998 | VP552     | 2392.186 | -0.18252 | 0.109563 | -1.66593 | 0.095728 | 0.159079 | 2378.133 | 2841.615 | 2412.796 | 2203.109 | 2181.893 | 2335.572 |
| 24498 | LOC103240 | 23.77121 | -0.1827  | 0.551451 | -0.3313  | 0.740418 | 0.803494 | 29.81475 | 21.34906 | 23.65487 | 33.4819  | 19.252   | 15.07469 |
| 16402 | RBBP5     | 2177.334 | -0.18271 | 0.115051 | -1.58809 | 0.112267 | 0.181967 | 2226.891 | 2610.06  | 2110.153 | 2051.325 | 1938.034 | 2127.542 |
| 16955 | GPATCH1   | 1058.536 | -0.18288 | 0.122011 | -1.49886 | 0.13391  | 0.209968 | 1084.173 | 1255.215 | 1036.64  | 979.9037 | 1005.382 | 989.9048 |
| 15695 | RBM15     | 2235.4   | -0.18289 | 0.106487 | -1.71744 | 0.085898 | 0.145499 | 2369.46  | 2508.241 | 2259.735 | 1988.825 | 1995.79  | 2290.348 |
| 14916 | PGM3      | 2041.023 | -0.18292 | 0.098829 | -1.85091 | 0.064182 | 0.114393 | 2193.824 | 2204.975 | 2117.111 | 1890.612 | 1807.549 | 2032.068 |
| 14226 | WDR33     | 4438.805 | -0.18295 | 0.092788 | -1.97168 | 0.048646 | 0.090909 | 4670.074 | 4975.426 | 4519.471 | 4008.9   | 4062.171 | 4396.785 |
| 15567 | DDX20     | 1468.897 | -0.18303 | 0.105565 | -1.73377 | 0.08296  | 0.141677 | 1541.694 | 1629.098 | 1515.303 | 1448.65  | 1287.745 | 1390.892 |
| 14726 | PTPN9     | 1963.075 | -0.18303 | 0.097122 | -1.88452 | 0.059494 | 0.107405 | 2096.79  | 2090.566 | 2078.15  | 1877.219 | 1726.262 | 1909.461 |
| 15908 | RNF146    | 1689.902 | -0.18326 | 0.108902 | -1.68276 | 0.092422 | 0.154443 | 1864.235 | 1749.528 | 1784.551 | 1520.078 | 1482.404 | 1738.614 |
| 20224 | MPHOSPH1  | 3012.625 | -0.18329 | 0.184818 | -0.99174 | 0.321322 | 0.422372 | 2579.247 | 4487.682 | 2544.29  | 2718.731 | 2868.547 | 2877.256 |
| 16897 | NSMF      | 1489.022 | -0.18341 | 0.121685 | -1.50725 | 0.131747 | 0.207294 | 1613.791 | 1482.391 | 1660.015 | 1437.49  | 1212.876 | 1527.569 |
| 16185 | LOC103216 | 3084.282 | -0.18341 | 0.11259  | -1.62903 | 0.103307 | 0.169694 | 3069.835 | 3719.116 | 3054.261 | 2870.515 | 2750.896 | 3041.068 |
| 15971 | BTAf1     | 5163.767 | -0.18342 | 0.109777 | -1.67081 | 0.09476  | 0.157735 | 5213.245 | 6279.908 | 4982.132 | 4703.092 | 4887.868 | 4916.36  |
| 17874 | LOC103228 | 710.016  | -0.18344 | 0.134366 | -1.3652  | 0.17219  | 0.256108 | 834.2709 | 680.9803 | 751.3899 | 638.3883 | 671.6807 | 683.386  |
| 25381 | LOC119626 | 7.602314 | -0.18347 | 0.995918 | -0.18423 | 0.853836 | 0.894322 | 9.215468 | 10.94824 | 4.87012  | 2.232127 | 4.278221 | 14.06971 |
| 16120 | RBM7      | 1527.017 | -0.18353 | 0.111741 | -1.64248 | 0.100491 | 0.165729 | 1537.899 | 1778.541 | 1557.047 | 1464.275 | 1354.057 | 1470.285 |
| 18970 | MAMLD1    | 670.7993 | -0.18366 | 0.154251 | -1.19066 | 0.233788 | 0.327636 | 680.8605 | 804.148  | 660.9448 | 580.353  | 566.8643 | 731.6251 |
| 14625 | KIAA0319L | 3787.816 | -0.18396 | 0.09667  | -1.90301 | 0.057039 | 0.103684 | 4073.779 | 4119.821 | 3898.879 | 3343.726 | 3435.412 | 3851.081 |
| 15547 | MRPS26    | 2214.873 | -0.18406 | 0.106028 | -1.73597 | 0.082569 | 0.141191 | 2409.574 | 2158.992 | 2500.459 | 2174.092 | 1948.73  | 2097.392 |
| 23915 | LOC103238 | 34.67586 | -0.18411 | 0.437605 | -0.42072 | 0.673956 | 0.7492   | 33.06727 | 40.50847 | 36.17803 | 37.94616 | 34.22577 | 26.12947 |
| 19593 | KDM1B     | 373.3512 | -0.18411 | 0.1694   | -1.08685 | 0.277102 | 0.375978 | 371.3292 | 457.6363 | 364.5632 | 339.2833 | 329.423  | 377.8723 |
| 18307 | PCGF1     | 743.8367 | -0.18424 | 0.143813 | -1.2811  | 0.200159 | 0.290666 | 761.0893 | 827.6867 | 790.3508 | 714.2806 | 579.699  | 789.9139 |
| 17662 | HAUS5     | 1108.972 | -0.1843  | 0.132214 | -1.39394 | 0.163335 | 0.245854 | 1158.981 | 1185.147 | 1203.615 | 926.3327 | 964.7389 | 1215.02  |
| 16145 | ATG16L1   | 2130.272 | -0.1846  | 0.112692 | -1.63807 | 0.101407 | 0.166981 | 2380.843 | 2177.604 | 2248.604 | 1928.558 | 1813.966 | 2232.059 |
| 18543 | B4GALT7   | 1362.967 | -0.18468 | 0.148439 | -1.24416 | 0.213442 | 0.306011 | 1639.811 | 1185.147 | 1530.609 | 1214.277 | 1165.815 | 1442.146 |
| 22932 | LOC103245 | 79.22894 | -0.18478 | 0.321952 | -0.57393 | 0.566013 | 0.656092 | 86.73382 | 104.0082 | 61.92009 | 69.19594 | 79.14709 | 74.36848 |
| 19653 | CMC2      | 1175.914 | -0.18487 | 0.171569 | -1.07751 | 0.281254 | 0.380437 | 1395.33  | 907.6088 | 1449.904 | 1055.796 | 1193.624 | 1053.218 |
| 17248 | PDCD7     | 832.0106 | -0.18503 | 0.126898 | -1.45808 | 0.144819 | 0.223214 | 869.5065 | 907.0614 | 884.9703 | 765.6196 | 701.6283 | 863.2774 |
| 16966 | MRPS25    | 1337.921 | -0.18507 | 0.123606 | -1.49722 | 0.134336 | 0.210499 | 1565.545 | 1279.301 | 1429.728 | 1265.616 | 1148.702 | 1338.633 |
| 17598 | GMPPA     | 1007.131 | -0.18508 | 0.132043 | -1.40165 | 0.16102  | 0.24309  | 1155.186 | 949.7595 | 1114.562 | 935.2612 | 859.9225 | 1028.094 |
| 14892 | UBA1      | 12714.91 | -0.18513 | 0.099748 | -1.85593 | 0.063464 | 0.113294 | 13248.05 | 14710.05 | 12637.26 | 11517.78 | 11277.39 | 12898.91 |
| 14666 | DOCK6     | 2263.813 | -0.18553 | 0.097922 | -1.89468 | 0.058135 | 0.105381 | 2418.789 | 2398.211 | 2416.275 | 1966.504 | 2136.972 | 2246.129 |
| 15090 | RBM12B    | 2362.411 | -0.18558 | 0.102066 | -1.81828 | 0.069022 | 0.1216   | 2648.092 | 2561.887 | 2332.787 | 2089.271 | 2312.379 | 2230.049 |
| 17159 | NID1      | 1705.549 | -0.18566 |          |          |          |          |          |          |          |          |          |          |



|       |           |          |          |          |          |          |          |          |          |          |          |          |          |
|-------|-----------|----------|----------|----------|----------|----------|----------|----------|----------|----------|----------|----------|----------|
| 25568 | LOC103226 | 4.527997 | -0.18585 | 1.195521 | -0.15545 | 0.876465 | 0.911319 | 2.168345 | 8.758589 | 3.478657 | 4.464254 | 4.278221 | 4.019918 |
| 24465 | ZAR1      | 25.11048 | -0.18599 | 0.553703 | -0.33591 | 0.736942 | 0.800768 | 28.73058 | 27.918   | 22.2634  | 22.32127 | 36.36488 | 13.06473 |
| 21349 | LOC103248 | 143.584  | -0.186   | 0.225626 | -0.82436 | 0.409736 | 0.510227 | 142.5687 | 163.6761 | 152.3652 | 122.767  | 145.4595 | 134.6672 |
| 15928 | WASHC1    | 1359.266 | -0.18628 | 0.110899 | -1.67974 | 0.093008 | 0.155237 | 1446.286 | 1520.71  | 1374.765 | 1339.276 | 1170.094 | 1304.463 |
| 14407 | NAA30     | 3807.218 | -0.18629 | 0.095927 | -1.94195 | 0.052143 | 0.096219 | 4361.627 | 3866.37  | 3932.969 | 3403.994 | 3600.123 | 3678.225 |
| 26018 | BRSK2     | 1.518927 | -0.1863  | 2.229469 | -0.08356 | 0.933403 | 0.953745 | 2.710432 | 0.547412 | 1.391463 | 4.464254 | 0        | 0        |
| 25445 | TRNAE-UU  | 5.279916 | -0.18633 | 1.077647 | -0.17291 | 0.862724 | 0.901376 | 8.131296 | 4.379295 | 4.174388 | 6.696381 | 4.278221 | 4.019918 |
| 21417 | TCEANC    | 151.6919 | -0.18639 | 0.228622 | -0.81527 | 0.414918 | 0.515057 | 168.5889 | 154.9175 | 158.6268 | 169.6417 | 134.764  | 123.6125 |
| 18760 | TNS3      | 1038.508 | -0.1864  | 0.152355 | -1.22347 | 0.221152 | 0.313397 | 1292.876 | 906.514  | 1120.128 | 870.5295 | 996.8256 | 1044.174 |
| 14424 | GRHPR     | 3329.769 | -0.18647 | 0.09615  | -1.93937 | 0.052456 | 0.096682 | 3714.918 | 3518.216 | 3406.301 | 3080.335 | 2943.416 | 3315.427 |
| 20047 | B9D1      | 557.9653 | -0.18652 | 0.182712 | -1.02082 | 0.307339 | 0.407572 | 668.9346 | 447.2355 | 668.5978 | 477.6752 | 515.5257 | 569.8234 |
| 18386 | UTP25     | 1617.701 | -0.18662 | 0.147257 | -1.2673  | 0.205047 | 0.296485 | 1507.542 | 2131.074 | 1528.522 | 1553.56  | 1426.787 | 1558.723 |
| 20502 | ALPK3     | 207.3709 | -0.18664 | 0.197261 | -0.94618 | 0.344057 | 0.446139 | 221.7133 | 211.8484 | 226.1127 | 198.6593 | 216.0502 | 169.8415 |
| 21735 | KLHDC1    | 125.0058 | -0.18671 | 0.241899 | -0.77185 | 0.440203 | 0.538431 | 140.9425 | 140.1374 | 117.5786 | 111.6063 | 126.2075 | 113.5627 |
| 21823 | LOC103238 | 119.7308 | -0.18675 | 0.246828 | -0.75661 | 0.449282 | 0.547337 | 135.5216 | 130.8314 | 116.1871 | 98.21359 | 124.0684 | 113.5627 |
| 26179 | LOC119621 | 0.7343   | -0.18678 | 3.147492 | -0.05934 | 0.95268  | 0.967455 | 1.626259 | 0.547412 | 0        | 2.232127 | 0        | 0        |
| 17318 | CALU      | 9670.586 | -0.18685 | 0.129257 | -1.44554 | 0.148305 | 0.227665 | 9147.707 | 12606.35 | 9133.561 | 9098.15  | 8911.535 | 9126.219 |
| 22900 | LOC103241 | 82.34607 | -0.18686 | 0.322642 | -0.57916 | 0.562478 | 0.65299  | 79.6867  | 106.7453 | 77.22618 | 91.51721 | 53.47777 | 85.42325 |
| 16828 | GMNN      | 867.3271 | -0.18686 | 0.122932 | -1.52006 | 0.128496 | 0.202999 | 961.1191 | 849.5831 | 960.805  | 761.1553 | 849.2269 | 822.0732 |
| 14677 | NAA50     | 6312.365 | -0.18695 | 0.098759 | -1.89298 | 0.05836  | 0.105711 | 6196.589 | 7407.577 | 6560.051 | 5714.245 | 5963.841 | 6031.887 |
| 23334 | LOC119622 | 48.49224 | -0.18701 | 0.367514 | -0.50886 | 0.610851 | 0.695992 | 50.95612 | 56.93083 | 47.30973 | 46.87467 | 40.6431  | 48.23901 |
| 12799 | CCT2      | 16038.91 | -0.18704 | 0.083504 | -2.23996 | 0.025093 | 0.052122 | 17567.39 | 17198.04 | 16471.44 | 14912.84 | 14359.85 | 15723.91 |
| 22826 | LOC119622 | 83.38318 | -0.18706 | 0.317666 | -0.58887 | 0.555951 | 0.647505 | 101.9122 | 64.59459 | 100.881  | 75.89232 | 70.59065 | 86.42823 |
| 24320 | CHST5     | 24.52663 | -0.18726 | 0.522271 | -0.35855 | 0.719932 | 0.787002 | 31.9831  | 26.82318 | 19.48048 | 20.08914 | 25.66933 | 23.11453 |
| 17701 | SF3B5     | 2442.06  | -0.18729 | 0.135332 | -1.38396 | 0.166369 | 0.249869 | 2837.822 | 2081.26  | 2884.502 | 2267.841 | 2201.145 | 2379.791 |
| 15312 | DNAJB4    | 2428.207 | -0.18736 | 0.105404 | -1.77756 | 0.075476 | 0.131042 | 2493.597 | 2855.847 | 2405.839 | 2323.644 | 2248.205 | 2242.109 |
| 19199 | RRNAD1    | 492.4918 | -0.18784 | 0.162834 | -1.15355 | 0.248686 | 0.344357 | 588.1637 | 436.2872 | 551.0192 | 433.0326 | 462.0479 | 484.4001 |
| 14975 | TRIM59    | 1708.072 | -0.18786 | 0.102161 | -1.83884 | 0.065939 | 0.117061 | 1839.841 | 1720.515 | 1893.781 | 1622.756 | 1644.976 | 1526.564 |
| 15774 | LOC119622 | 1654.118 | -0.18796 | 0.110178 | -1.70594 | 0.088018 | 0.148343 | 1718.414 | 1834.924 | 1738.633 | 1415.169 | 1525.186 | 1692.385 |
| 19738 | LOC119618 | 366.7401 | -0.18798 | 0.176969 | -1.06223 | 0.288132 | 0.388063 | 363.74   | 463.6578 | 343.6913 | 325.8905 | 365.7879 | 337.6731 |
| 16010 | ZCCHC8    | 1128.67  | -0.188   | 0.113074 | -1.66262 | 0.096388 | 0.160044 | 1146.513 | 1301.198 | 1159.088 | 1037.939 | 1060.999 | 1066.283 |
| 17060 | JPH1      | 1186.082 | -0.18802 | 0.126529 | -1.48597 | 0.137286 | 0.213937 | 1216.442 | 1428.197 | 1147.261 | 1116.063 | 1041.747 | 1166.781 |
| 15909 | TTC3      | 14546.46 | -0.18811 | 0.111785 | -1.68277 | 0.092419 | 0.154443 | 14392.94 | 17925.55 | 14165.09 | 13374.9  | 13057.13 | 14363.17 |
| 16163 | MED10     | 997.1138 | -0.18847 | 0.115341 | -1.63404 | 0.10225  | 0.168181 | 1074.957 | 1032.419 | 1080.471 | 986.6001 | 853.5052 | 954.7305 |
| 18416 | FBXL12    | 717.3336 | -0.1885  | 0.149357 | -1.26208 | 0.206919 | 0.298706 | 818.5504 | 726.9629 | 752.7813 | 667.406  | 560.447  | 777.8541 |
| 16558 | GPATCH2   | 1681.646 | -0.18856 | 0.120525 | -1.5645  | 0.1177   | 0.188976 | 1779.127 | 1997.506 | 1597.399 | 1466.507 | 1668.506 | 1580.833 |
| 15131 | GALNT10   | 2769.851 | -0.18871 | 0.104306 | -1.8092  | 0.07042  | 0.123727 | 2950.576 | 3060.032 | 2849.716 | 2410.697 | 2489.925 | 2858.162 |
| 14793 | RICTOR    | 4518.019 | -0.18878 | 0.100716 | -1.87441 | 0.060874 | 0.109399 | 4562.741 | 5309.895 | 4568.868 | 4028.989 | 4308.169 | 4329.452 |
| 15566 | FNDC3A    | 3539.378 | -0.18905 | 0.109034 | -1.73384 | 0.082946 | 0.141665 | 3595.659 | 4241.347 | 3477.265 | 3379.44  | 3131.658 | 3410.9   |
| 18218 | USP42     | 1547.484 | -0.18933 | 0.145771 | -1.2988  | 0.194014 | 0.283119 | 1447.371 | 2031.993 | 1466.602 | 1502.221 | 1392.561 | 1444.155 |
| 18450 | CCDC124   | 818.053  | -0.18935 | 0.150651 | -1.25691 | 0.208787 | 0.300847 | 737.2375 | 1022.018 | 858.5325 | 743.2983 | 725.1585 | 822.0732 |
| 13525 | PIR       | 2721.53  | -0.18938 | 0.090066 | -2.10262 | 0.035499 | 0.069777 | 2897.994 | 2904.567 | 2892.851 | 2564.714 | 2628.967 | 2440.09  |
| 22454 | LOC103238 | 107.73   | -0.18939 | 0.291853 | -0.64891 | 0.516394 | 0.611371 | 111.1277 | 100.7238 | 130.1018 | 133.9276 | 94.12087 | 76.37844 |
| 14286 | DRAP1     | 3733.904 | -0.18953 | 0.096452 | -1.96506 | 0.049408 | 0.091943 | 3812.493 | 4295.541 | 3826.523 | 3640.599 | 3386.212 | 3442.055 |
| 17479 | SLC25A33  | 901.822  | -0.18955 | 0.133934 | -1.41524 | 0.156997 | 0.23883  | 1072.789 | 830.4237 | 979.5898 | 850.4404 | 838.5314 | 839.1579 |
| 14417 | TUBGCP4   | 3459.27  | -0.18958 | 0.097692 | -1.94056 | 0.052311 | 0.096462 | 3691.066 | 3834.072 | 3539.881 | 3191.942 | 3020.424 | 3478.234 |
| 16874 | TMEM11    | 815.3216 | -0.18972 | 0.125613 | -1.51039 | 0.130945 | 0.206304 | 871.6749 | 846.8461 | 892.6233 | 772.3159 | 682.3763 | 826.0931 |
| 14498 | DIDO1     | 4305.631 | -0.18975 | 0.098548 | -1.92546 | 0.054171 | 0.099334 | 4407.162 | 4955.719 | 4407.458 | 3953.097 | 3831.147 | 4279.203 |
| 15742 | LOC103214 | 1044.14  | -0.1898  | 0.110949 | -1.7107  | 0.087136 | 0.147154 | 1138.923 | 1147.923 | 1051.946 | 984.368  | 949.7651 | 991.9147 |
| 17120 | PHF8      | 105.26   | -0.19001 | 0.128549 | -1.47808 | 0.139386 | 0.216448 | 1089.594 | 1336.232 | 1111.083 | 1015.618 | 977.5736 | 1101.457 |
| 19033 | PANX2     | 332.6568 | -0.19004 | 0.161189 | -1.17896 | 0.238414 | 0.333013 | 381.0867 | 342.1324 | 339.5169 | 330.3548 | 297.3364 | 305.5138 |
| 14835 | SEPTIN7   | 17005.62 | -0.19008 | 0.101926 | -1.86485 | 0.062202 | 0.111461 | 17005.25 | 20502.21 | 16862.44 | 16267.74 | 15921.4  | 15474.67 |
| 25307 | LOC119622 | 7.233852 | -0.1901  | 0.96041  | -0.19794 | 0.843093 | 0.885669 | 8.131296 | 9.306001 | 6.261582 | 2.232127 | 6.417332 | 11.05477 |
| 20875 | PRSS41    | 271.3778 | -0.19014 | 0.212558 | -0.89453 | 0.371036 | 0.472527 | 349.6457 | 219.5121 | 297.773  | 267.8552 | 250.2759 | 243.205  |
| 15785 | RATGEF6   | 2087.87  | -0.19016 | 0.111577 | -1.70431 | 0.088323 | 0.148752 | 2203.581 | 2458.426 | 2013.447 | 1866.058 | 2030.016 | 1955.69  |
| 16748 | ATMIN     | 2712.014 | -0.19025 | 0.124025 | -1.53394 | 0.125045 | 0.19849  | 2679.533 | 3383.552 | 2611.08  | 2529     | 2393.665 | 2675.255 |
| 15849 | LOC103238 | 3199.497 | -0.19032 | 0.112515 | -1.69147 | 0.090746 | 0.152218 | 3198.852 | 3856.516 | 3177.405 | 3060.246 | 2791.539 | 3112.421 |
| 15610 | SRF       | 1816.798 | -0.19037 | 0.110177 | -1.72784 | 0.084016 | 0.143091 | 1803.521 | 2130.527 | 1878.475 | 1669.631 | 1642.837 | 1775.799 |
| 14786 | TPD52     | 5643.38  | -0.19037 | 0.101475 | -1.87604 | 0.06065  | 0.109048 | 5748.826 | 6702.51  | 5596.463 | 5178.535 | 5180.926 | 5453.019 |
| 15456 | ABAT      | 1125.048 | -0.19039 | 0.108731 | -1.75103 | 0.07994  | 0.13746  | 1181.748 | 1219.086 | 1200.137 | 986.6001 | 1065.277 | 1097.438 |
| 15380 | CIAO1     | 2351.401 | -0.1906  | 0.108066 | -1.7637  | 0.077783 | 0.134452 | 2659.476 | 2301.319 | 2564.466 | 2158.467 | 2059.964 | 2364.717 |
| 19830 | LOC119622 | 540.5413 | -0.19061 | 0.181622 | -1.04948 | 0.293958 | 0.394093 | 497.0932 | 736.8163 | 493.9693 | 508.925  | 506.9692 | 499.4748 |
| 14396 | DCAF13    | 3487.199 | -0.19064 | 0.098094 | -1.94346 | 0.051961 | 0.095956 | 3558.255 | 4066.722 | 3525.967 | 3278.995 | 3247.17  | 3246.084 |
| 16197 | PDS52     | 1125.386 | -0.19081 | 0.117252 | -1.62738 | 0.103657 | 0.170137 | 1245.172 | 1180.22  | 1179.96  | 968.7431 | 1022.495 | 1155.726 |
| 20812 | CAMSAP3   | 184.4281 | -0.19086 | 0.211406 | -0.90282 | 0.366619 | 0.468315 | 192.4407 | 207.4691 | 189.2389 | 203.1236 | 145.4595 | 168.8366 |
| 23006 | EMILIN2   | 79.54664 | -0.19096 | 0.339821 | -0.56195 | 0.57415  | 0.663469 | 56.91907 | 108.935  | 89.05362 | 66.96381 | 77.00798 | 78.3884  |
| 14287 | SOAT1     | 2630.449 | -0.19097 | 0.097203 | -1.96468 | 0.049451 | 0.092018 | 2840.533 | 2886.502 | 2691.089 | 2310.251 | 2451.421 | 2602.897 |
| 18372 | SPATA7    | 609.8101 | -0.19123 | 0.150814 | -1.26801 | 0.204794 | 0.296344 | 581.6587 | 741.1956 | 624.071  | 582.5851 | 611.7857 | 517.5644 |
| 24402 | LOC119622 | 23.45709 | -0.19129 | 0.552118 | -0.34646 | 0.728997 | 0.794213 | 33.60935 | 18.06459 | 23.65487 | 15.62489 | 25.66933 | 24.11951 |
| 14930 | ZNZF24    | 5004.713 | -0.19146 | 0.103561 | -1.84874 | 0.064495 | 0.114843 | 5020.262 | 5960.22  | 5031.529 | 4506.664 | 4635.453 | 4874.15  |
| 14921 | PSME2     | 5013.704 | -0.19146 | 0.103456 | -1.85067 | 0.064217 | 0.11441  |          |          |          |          |          |          |



|       |           |          |          |          |          |          |          |          |          |          |          |          |          |
|-------|-----------|----------|----------|----------|----------|----------|----------|----------|----------|----------|----------|----------|----------|
| 14212 | PCNX1     | 7740.932 | -0.19163 | 0.096998 | -1.97562 | 0.048198 | 0.090159 | 8202.309 | 8851.102 | 7715.661 | 6906.201 | 7009.866 | 7760.451 |
| 17995 | SSH2      | 1105.7   | -0.19172 | 0.142686 | -1.34365 | 0.17906  | 0.264536 | 1028.338 | 1412.322 | 1097.168 | 1040.171 | 998.9647 | 1057.238 |
| 22921 | LOC119621 | 71.73746 | -0.19176 | 0.332772 | -0.57625 | 0.564449 | 0.654678 | 61.79785 | 95.79707 | 73.05179 | 62.49956 | 59.8951  | 77.38342 |
| 23909 | LOC103234 | 34.6064  | -0.19178 | 0.455073 | -0.42142 | 0.673451 | 0.748826 | 30.35684 | 47.07742 | 34.09084 | 31.24978 | 25.66933 | 39.1942  |
| 16020 | HMGXB4    | 2119.508 | -0.1918  | 0.115403 | -1.66197 | 0.096519 | 0.160162 | 2134.736 | 2534.517 | 2114.328 | 1832.576 | 2023.599 | 2077.293 |
| 18849 | METRN1    | 510.899  | -0.19183 | 0.158235 | -1.21232 | 0.225389 | 0.317985 | 561.6015 | 460.9207 | 614.3308 | 457.586  | 468.4652 | 502.4897 |
| 14504 | BLOC156   | 1862.461 | -0.19199 | 0.099812 | -1.92349 | 0.054419 | 0.099746 | 2023.066 | 2070.859 | 1865.256 | 1698.649 | 1756.21  | 1760.724 |
| 25210 | LOC119621 | 8.352369 | -0.19211 | 0.900494 | -0.21334 | 0.831065 | 0.876392 | 10.29964 | 4.379295 | 11.82743 | 11.16063 | 6.417332 | 6.029877 |
| 15057 | TMX2      | 2657.718 | -0.19214 | 0.105368 | -1.82349 | 0.06823  | 0.120469 | 2819.933 | 3098.898 | 2584.642 | 2542.393 | 2382.969 | 2517.474 |
| 18298 | RBCK1     | 759.8778 | -0.19223 | 0.149781 | -1.28339 | 0.199356 | 0.289643 | 890.1058 | 682.0751 | 862.7069 | 709.8164 | 641.7332 | 772.8292 |
| 16183 | SMO       | 2182.412 | -0.19227 | 0.118021 | -1.62911 | 0.10329  | 0.169682 | 2471.914 | 2144.212 | 2374.531 | 1964.272 | 1848.192 | 2291.353 |
| 22897 | LOC119621 | 72.40853 | -0.1926  | 0.332176 | -0.57981 | 0.562042 | 0.65257  | 60.17159 | 99.08154 | 72.35606 | 69.19594 | 66.31243 | 67.33362 |
| 13784 | DELE1     | 3376.099 | -0.19263 | 0.093985 | -2.0496  | 0.040403 | 0.077925 | 3751.238 | 3454.716 | 3603.193 | 3091.496 | 3020.424 | 3335.527 |
| 17680 | ZNF35     | 771.3325 | -0.19269 | 0.138742 | -1.38884 | 0.164881 | 0.247927 | 751.3317 | 949.2121 | 768.0874 | 714.2806 | 714.463  | 730.6201 |
| 13771 | C1GALT1   | 8886.622 | -0.19291 | 0.09398  | -2.05271 | 0.040101 | 0.077415 | 9111.93  | 10405.75 | 8921.363 | 8171.817 | 8423.818 | 8285.051 |
| 14948 | MINDY3    | 1440.434 | -0.19296 | 0.104551 | -1.84561 | 0.064949 | 0.115512 | 1532.478 | 1623.623 | 1454.079 | 1357.133 | 1315.553 | 1359.737 |
| 16705 | ZNF618    | 2772.475 | -0.19296 | 0.125172 | -1.54159 | 0.123173 | 0.196014 | 2695.253 | 3369.867 | 2814.233 | 2457.572 | 2391.526 | 2906.401 |
| 18521 | FASKT     | 2790.57  | -0.19298 | 0.154676 | -1.24764 | 0.212164 | 0.30454  | 3360.935 | 2255.884 | 3317.943 | 2620.517 | 2320.935 | 2867.206 |
| 15032 | LRPAP1    | 2513.12  | -0.19299 | 0.105618 | -1.82721 | 0.067668 | 0.119676 | 2603.641 | 2900.188 | 2543.594 | 2343.733 | 2186.171 | 2501.394 |
| 15907 | TRIM27    | 1388.124 | -0.19319 | 0.114799 | -1.68282 | 0.09241  | 0.154443 | 1628.97  | 1382.215 | 1434.598 | 1261.152 | 1262.075 | 1359.737 |
| 24893 | GRHL3     | 15.44309 | -0.19339 | 0.725178 | -0.26667 | 0.78972  | 0.843398 | 10.29964 | 21.89647 | 17.39328 | 4.464254 | 23.53022 | 15.07469 |
| 16848 | DAD1      | 4145.943 | -0.19349 | 0.127661 | -1.51563 | 0.129613 | 0.20452  | 3990.84  | 5330.149 | 3950.363 | 3850.419 | 3786.226 | 3967.659 |
| 18228 | LOC103211 | 1547.166 | -0.19355 | 0.14931  | -1.29626 | 0.194886 | 0.284235 | 1808.942 | 1375.098 | 1774.811 | 1404.008 | 1242.823 | 1677.311 |
| 17923 | NMNAT1    | 431.4428 | -0.19355 | 0.142735 | -1.35601 | 0.175097 | 0.25972  | 456.4367 | 467.4897 | 459.1827 | 399.5507 | 382.9008 | 423.0964 |
| 18163 | RBMX2     | 1675.412 | -0.19368 | 0.147864 | -1.30985 | 0.190246 | 0.278461 | 1574.761 | 2224.134 | 1563.308 | 1515.614 | 1630.002 | 1544.653 |
| 16993 | ALPK1     | 762.263  | -0.19372 | 0.129738 | -1.49315 | 0.135397 | 0.211824 | 876.5537 | 792.1049 | 775.7405 | 674.1023 | 680.2372 | 774.8392 |
| 24480 | LOC103234 | 24.58439 | -0.1938  | 0.580979 | -0.33357 | 0.7387   | 0.802219 | 33.06727 | 15.32753 | 29.22072 | 29.01765 | 27.80844 | 13.06473 |
| 23828 | LOC119611 | 54.98204 | -0.19384 | 0.447097 | -0.43356 | 0.664608 | 0.741505 | 43.36691 | 94.70224 | 36.87376 | 60.26743 | 53.47777 | 41.20416 |
| 15376 | ARHGAP2E  | 2883.747 | -0.19395 | 0.109937 | -1.76423 | 0.077693 | 0.13433  | 2903.957 | 3470.043 | 2860.152 | 2631.678 | 2641.802 | 2794.848 |
| 14748 | MAPKAPK1  | 6517.999 | -0.19397 | 0.103102 | -1.88133 | 0.059927 | 0.108024 | 7128.436 | 6971.289 | 6775.032 | 6084.778 | 5414.089 | 6734.367 |
| 23405 | TSGA13    | 44.77572 | -0.19409 | 0.389749 | -0.49798 | 0.618499 | 0.702534 | 55.29281 | 49.26706 | 38.96096 | 42.41041 | 38.50399 | 44.2191  |
| 17723 | ISCA2     | 1064.853 | -0.19416 | 0.140677 | -1.3802  | 0.167526 | 0.251294 | 1213.731 | 957.9707 | 1241.88  | 979.9037 | 911.2611 | 1084.373 |
| 19290 | MRPL55    | 734.323  | -0.19426 | 0.170852 | -1.13699 | 0.255544 | 0.352195 | 894.9846 | 596.6789 | 862.0112 | 671.8702 | 641.7332 | 738.6599 |
| 17334 | HELQ      | 552.086  | -0.19443 | 0.134759 | -1.44278 | 0.149083 | 0.228647 | 603.3421 | 572.0453 | 594.1546 | 535.7105 | 470.6043 | 536.659  |
| 15094 | ZBTB18    | 1823.501 | -0.1947  | 0.107164 | -1.81685 | 0.069239 | 0.121935 | 1927.117 | 2082.902 | 1832.556 | 1712.041 | 1591.498 | 1794.893 |
| 12435 | TOMM6     | 4086.651 | -0.19471 | 0.084142 | -2.31407 | 0.020664 | 0.044178 | 4338.859 | 4273.097 | 4472.857 | 3837.026 | 3835.425 | 3762.643 |
| 18295 | EXOSC9    | 1381.731 | -0.19475 | 0.151612 | -1.2845  | 0.198965 | 0.289122 | 1297.755 | 1839.851 | 1285.016 | 1332.58  | 1292.023 | 1243.16  |
| 21210 | SLC16A6   | 223.9529 | -0.19475 | 0.229526 | -0.8485  | 0.39616  | 0.496555 | 198.4036 | 302.7187 | 214.2853 | 198.6593 | 241.7195 | 187.9312 |
| 24487 | SLC22A13  | 22.14401 | -0.19476 | 0.585282 | -0.33276 | 0.739312 | 0.802655 | 26.02015 | 16.96977 | 27.82925 | 31.24978 | 10.69555 | 20.09959 |
| 23268 | RTN4RL2   | 51.85099 | -0.19478 | 0.375153 | -0.51921 | 0.603617 | 0.689666 | 55.8349  | 61.31012 | 47.30973 | 60.26743 | 49.19955 | 37.18424 |
| 13422 | IER3IP1   | 2412.897 | -0.19487 | 0.091811 | -2.12252 | 0.033794 | 0.066936 | 2476.793 | 2613.891 | 2634.735 | 2281.234 | 2256.762 | 2213.97  |
| 18835 | SLC25A23  | 541.0639 | -0.19488 | 0.160641 | -1.21311 | 0.225089 | 0.317705 | 531.2446 | 681.5277 | 522.4943 | 484.3716 | 477.0217 | 549.7238 |
| 23987 | LOC103231 | 32.56594 | -0.1949  | 0.477108 | -0.40851 | 0.6829   | 0.756864 | 41.19856 | 25.18094 | 36.87376 | 37.94616 | 32.08666 | 22.10955 |
| 23492 | LOC119621 | 42.76688 | -0.19502 | 0.401406 | -0.48584 | 0.627084 | 0.709647 | 43.909   | 39.41365 | 52.87558 | 40.17829 | 47.06043 | 33.16432 |
| 15769 | ARL10     | 2240.113 | -0.19531 | 0.114409 | -1.70716 | 0.087793 | 0.148011 | 2599.846 | 2171.583 | 2409.318 | 2002.218 | 1974.399 | 2283.313 |
| 16893 | THYN1     | 1113.756 | -0.19533 | 0.12958  | -1.50741 | 0.131705 | 0.207269 | 1064.116 | 1343.896 | 1155.61  | 1091.51  | 1054.582 | 972.8201 |
| 23919 | MORN1     | 29.54594 | -0.19533 | 0.465175 | -0.41991 | 0.674551 | 0.749736 | 33.60935 | 31.20247 | 29.91645 | 22.32127 | 32.08666 | 28.13943 |
| 23945 | HIC1      | 31.36334 | -0.1955  | 0.4699   | -0.41606 | 0.677369 | 0.752051 | 34.69353 | 37.224   | 28.52499 | 20.08914 | 38.50399 | 29.1444  |
| 13010 | EIF2B1    | 2595.516 | -0.1956  | 0.088812 | -2.20242 | 0.027636 | 0.056471 | 2803.671 | 2782.494 | 2729.354 | 2379.447 | 2412.917 | 2465.215 |
| 25434 | LOC103241 | 5.274391 | -0.19578 | 1.115942 | -0.17544 | 0.860736 | 0.899657 | 3.794605 | 4.379295 | 8.348776 | 6.696381 | 6.417332 | 2.009959 |
| 20303 | LOC119621 | 245.0292 | -0.19585 | 0.200262 | -0.97799 | 0.328079 | 0.429592 | 256.4069 | 293.4127 | 233.07   | 207.5878 | 271.6671 | 208.0308 |
| 13450 | SMU1      | 3495.69  | -0.19587 | 0.092517 | -2.11709 | 0.034253 | 0.067703 | 3778.884 | 3870.749 | 3551.013 | 3095.96  | 3319.9   | 3357.636 |
| 23314 | LOC119621 | 61.74055 | -0.19598 | 0.383091 | -0.51157 | 0.608955 | 0.694393 | 62.88202 | 90.87036 | 43.13534 | 60.26743 | 62.03421 | 51.25395 |
| 16029 | KATNIP    | 1679.115 | -0.19601 | 0.118026 | -1.66074 | 0.096766 | 0.160505 | 1743.35  | 1867.222 | 1775.506 | 1562.489 | 1375.448 | 1750.674 |
| 23401 | LOC119621 | 55.29495 | -0.19611 | 0.393174 | -0.49878 | 0.617932 | 0.70201  | 71.5554  | 44.88777 | 61.22436 | 64.73168 | 32.08666 | 57.28383 |
| 14639 | USP39     | 2439.17  | -0.19612 | 0.103273 | -1.89904 | 0.057559 | 0.104529 | 2509.318 | 2836.141 | 2469.151 | 2348.198 | 2164.78  | 2307.433 |
| 16726 | ZNF384    | 1855.022 | -0.1962  | 0.127586 | -1.5378  | 0.124098 | 0.197247 | 1805.148 | 2333.617 | 1804.727 | 1732.131 | 1687.758 | 1766.754 |
| 24144 | SYN3      | 30.14143 | -0.19629 | 0.511538 | -0.38372 | 0.701182 | 0.772073 | 30.89892 | 37.77142 | 26.43779 | 29.01765 | 40.6431  | 16.07967 |
| 22626 | TSPAN10   | 100.6143 | -0.19661 | 0.317198 | -0.61984 | 0.535361 | 0.629036 | 116.5486 | 72.25836 | 134.9719 | 78.12444 | 96.25998 | 105.5228 |
| 20991 | LOC119621 | 174.8893 | -0.19673 | 0.223566 | -0.87994 | 0.37889  | 0.479862 | 190.8144 | 154.3701 | 215.6767 | 169.6417 | 154.016  | 164.8166 |
| 11908 | YME1L1    | 8235.72  | -0.1968  | 0.081216 | -2.42315 | 0.015387 | 0.034351 | 8746.564 | 9026.273 | 8620.807 | 7587     | 7510.418 | 7923.258 |
| 13802 | XRCC5     | 27052.29 | -0.19708 | 0.096292 | -2.04671 | 0.040686 | 0.078369 | 27590.03 | 32023.59 | 27081.34 | 24711.88 | 24612.61 | 26294.28 |
| 17722 | WDR24     | 1007.015 | -0.19715 | 0.14281  | -1.3805  | 0.167432 | 0.251168 | 1167.654 | 929.5053 | 1134.738 | 950.8861 | 817.1403 | 1042.164 |
| 16546 | CHIC2     | 707.8792 | -0.19716 | 0.125878 | -1.56627 | 0.117285 | 0.188445 | 753.5001 | 743.9327 | 766.696  | 680.7987 | 697.3501 | 604.9976 |
| 18356 | TPRKB     | 395.362  | -0.19717 | 0.154939 | -1.27259 | 0.203165 | 0.294244 | 390.3022 | 428.076  | 445.9638 | 388.3901 | 380.7617 | 338.6781 |
| 25349 | TRNAK-UU  | 6.156758 | -0.19731 | 1.038231 | -0.19004 | 0.849276 | 0.890668 | 5.96295  | 8.758589 | 5.565851 | 4.464254 | 2.139111 | 10.04979 |
| 19633 | JMJD4     | 1153.942 | -0.19739 | 0.182799 | -1.07983 | 0.280219 | 0.379443 | 1465.259 | 868.7425 | 1367.112 | 1080.349 | 958.3216 | 1183.866 |
| 14774 | RETREG3   | 4326.599 | -0.19749 | 0.105185 | -1.87756 | 0.060441 | 0.10876  | 4876.609 | 4378.747 | 4620.352 | 3814.705 | 3781.948 | 4487.233 |
| 22647 | LOC119621 | 132.1652 | -0.19752 | 0.32077  | -0.61578 | 0.53804  | 0.631597 | 192.4407 | 84.30142 | 148.1908 | 120.5349 | 104.8164 | 142.7071 |
| 13756 | PPP1R3C   | 2579.378 | -0.19755 | 0.096092 | -2.05587 | 0.039795 | 0.076908 | 2747.836 | 2838.33  | 2686.915 | 2328.108 | 2312.379 | 2562.698 |
| 19011 | LOC103221 | 725.3415 | -0.      |          |          |          |          |          |          |          |          |          |          |



|       |           |          |          |          |          |          |          |          |          |          |          |          |          |
|-------|-----------|----------|----------|----------|----------|----------|----------|----------|----------|----------|----------|----------|----------|
| 17038 | IDS       | 5917.437 | -0.19792 | 0.133066 | -1.48741 | 0.136907 | 0.213621 | 5530.907 | 7769.416 | 5668.819 | 5495.497 | 5347.777 | 5692.204 |
| 16843 | TBKBP1    | 589.9841 | -0.19793 | 0.130493 | -1.5168  | 0.129318 | 0.204116 | 623.3993 | 642.6615 | 626.854  | 569.1924 | 506.9692 | 570.8283 |
| 13197 | SEH1L     | 2324.639 | -0.198   | 0.091258 | -2.16962 | 0.030036 | 0.060506 | 2533.712 | 2482.513 | 2437.843 | 2151.77  | 2121.998 | 2220     |
| 16117 | ZSCAN12   | 1087.068 | -0.19818 | 0.120638 | -1.64279 | 0.100426 | 0.165653 | 1098.809 | 1281.491 | 1106.213 | 953.1182 | 1039.608 | 1043.169 |
| 13632 | MED23     | 3635.227 | -0.1982  | 0.095173 | -2.08248 | 0.037299 | 0.07274  | 3839.598 | 4114.895 | 3704.074 | 3299.084 | 3274.978 | 3578.732 |
| 24104 | CMTM8     | 35.66006 | -0.19845 | 0.509344 | -0.38961 | 0.696825 | 0.768494 | 49.87195 | 20.25424 | 43.13534 | 37.94616 | 40.6431  | 22.10955 |
| 12774 | UHRF2     | 4443.586 | -0.19846 | 0.088387 | -2.24538 | 0.024744 | 0.051496 | 4840.289 | 4710.479 | 4701.057 | 4118.274 | 3933.825 | 4357.591 |
| 17905 | PDS5B     | 3784.596 | -0.19853 | 0.145895 | -1.36079 | 0.173579 | 0.257727 | 3558.255 | 5123.775 | 3450.828 | 3613.814 | 3452.525 | 3508.383 |
| 18699 | FAM118A   | 424.278  | -0.19883 | 0.161862 | -1.22841 | 0.219295 | 0.311779 | 506.8508 | 418.2226 | 438.3108 | 397.3186 | 350.8141 | 434.1511 |
| 15504 | SUDS3     | 3135.998 | -0.19887 | 0.11408  | -1.74321 | 0.081298 | 0.139394 | 3104.529 | 3818.745 | 3135.661 | 2808.016 | 2855.713 | 3093.327 |
| 15897 | EMC10     | 1201.807 | -0.1991  | 0.11818  | -1.68468 | 0.09205  | 0.153938 | 1233.246 | 1363.055 | 1261.361 | 1154.01  | 1003.243 | 1195.926 |
| 11935 | CCR8      | 13942.91 | -0.19918 | 0.082373 | -2.41803 | 0.015605 | 0.034759 | 14502.44 | 15692.11 | 14519.22 | 13006.6  | 12693.48 | 13243.62 |
| 14649 | ODR4      | 1219.707 | -0.19942 | 0.10511  | -1.89724 | 0.057797 | 0.104889 | 1308.596 | 1274.922 | 1325.368 | 1136.153 | 1180.789 | 1092.413 |
| 15595 | TCF20     | 6142.615 | -0.19949 | 0.115297 | -1.7302  | 0.083594 | 0.142504 | 6050.768 | 7533.481 | 6120.349 | 5624.96  | 5343.498 | 6182.634 |
| 13624 | FBX07     | 4115.181 | -0.19955 | 0.095744 | -2.08423 | 0.037139 | 0.072471 | 4375.721 | 4649.716 | 4177.171 | 3837.026 | 3604.401 | 4047.052 |
| 16335 | PSMD9     | 974.0271 | -0.19965 | 0.124849 | -1.59912 | 0.109795 | 0.17869  | 1099.351 | 931.1475 | 1096.473 | 859.3689 | 909.122  | 948.7006 |
| 13418 | VPS8      | 2396.339 | -0.19969 | 0.094053 | -2.12312 | 0.033744 | 0.066857 | 2610.688 | 2578.31  | 2500.459 | 2241.055 | 2121.998 | 2325.522 |
| 16760 | SP1       | 5463.658 | -0.19978 | 0.130457 | -1.53139 | 0.125674 | 0.199346 | 5231.676 | 7096.099 | 5198.505 | 4924.072 | 4967.015 | 5364.58  |
| 25437 | LOC119621 | 7.107767 | -0.19998 | 1.140629 | -0.17532 | 0.860826 | 0.899676 | 14.09425 | 4.379295 | 4.174388 | 0        | 14.97377 | 5.024897 |
| 19214 | TBX2      | 354.7724 | -0.19999 | 0.173709 | -1.15129 | 0.249614 | 0.345372 | 375.1238 | 367.8607 | 396.5669 | 265.6231 | 380.7617 | 342.698  |
| 13390 | AKT1      | 8619.31  | -0.2     | 0.093918 | -2.12948 | 0.033214 | 0.065945 | 9431.219 | 9269.872 | 8954.758 | 7854.855 | 7454.801 | 8750.356 |
| 22754 | AGAP2     | 80.30794 | -0.20005 | 0.333195 | -0.6004  | 0.548241 | 0.64052  | 68.30288 | 94.70224 | 92.53227 | 100.4457 | 70.59065 | 55.27387 |
| 25635 | LOC103231 | 3.394505 | -0.20033 | 1.385818 | -0.14456 | 0.885058 | 0.917857 | 2.168345 | 2.189647 | 6.261582 | 4.464254 | 4.278221 | 1.004979 |
| 22178 | FRMPD3    | 87.91102 | -0.20035 | 0.288223 | -0.69513 | 0.486975 | 0.583742 | 91.07051 | 108.935  | 82.79203 | 80.35657 | 74.86887 | 89.44317 |
| 14970 | LOC103215 | 8331.603 | -0.20043 | 0.10894  | -1.83979 | 0.065799 | 0.116851 | 8527.019 | 9807.977 | 8400.956 | 7459.768 | 7168.16  | 8625.739 |
| 19489 | PIGBOS1   | 361.1059 | -0.2006  | 0.181955 | -1.10246 | 0.270263 | 0.368667 | 393.0126 | 343.2272 | 420.2217 | 299.105  | 408.5701 | 302.4988 |
| 15360 | ELP5      | 865.5792 | -0.20076 | 0.1136   | -1.76723 | 0.077189 | 0.133598 | 943.7724 | 937.7164 | 895.4063 | 790.173  | 821.4185 | 804.9886 |
| 15517 | KLHL2     | 1715.514 | -0.20078 | 0.115396 | -1.73988 | 0.08188  | 0.140283 | 1769.37  | 2061.553 | 1672.538 | 1564.721 | 1630.002 | 1594.902 |
| 20000 | ZBTB12    | 242.4382 | -0.20079 | 0.194975 | -1.02981 | 0.3031   | 0.402895 | 225.5079 | 282.4645 | 271.3352 | 196.4272 | 241.7195 | 237.1752 |
| 23523 | LOC103221 | 48.70087 | -0.20084 | 0.41875  | -0.47962 | 0.631499 | 0.713701 | 66.13454 | 35.03436 | 56.35424 | 33.4819  | 44.92132 | 56.27885 |
| 20983 | LOC119621 | 176.8332 | -0.20089 | 0.22794  | -0.88131 | 0.378147 | 0.479126 | 182.6831 | 214.038  | 167.6713 | 167.4095 | 192.52   | 136.6772 |
| 16291 | POLG      | 5560.057 | -0.2009  | 0.124895 | -1.60857 | 0.10771  | 0.17577  | 6419.929 | 5275.408 | 6152.353 | 5116.035 | 4479.298 | 5917.319 |
| 17414 | SASS6     | 1957.814 | -0.20098 | 0.140826 | -1.42719 | 0.153525 | 0.234378 | 1881.04  | 2543.823 | 1853.428 | 1837.041 | 1940.173 | 1691.38  |
| 19164 | GFR4A     | 338.6868 | -0.20106 | 0.173529 | -1.15865 | 0.246598 | 0.342097 | 409.2752 | 326.2574 | 353.4315 | 316.962  | 284.5017 | 341.693  |
| 23152 | LOC103241 | 48.63537 | -0.20108 | 0.374853 | -0.53643 | 0.591662 | 0.679394 | 59.6295  | 47.62483 | 48.00546 | 53.57105 | 42.78221 | 40.19918 |
| 13555 | RFC2      | 3372.867 | -0.20127 | 0.095913 | -2.09847 | 0.035864 | 0.070355 | 3782.679 | 3337.022 | 3706.161 | 3147.299 | 3046.094 | 3217.944 |
| 12618 | EPS8      | 16850.85 | -0.20128 | 0.088363 | -2.27789 | 0.022733 | 0.047896 | 17711.59 | 19248.64 | 17117.77 | 15357.03 | 15249.72 | 16420.36 |
| 17554 | TXN2      | 1426.077 | -0.20138 | 0.143181 | -1.40651 | 0.159574 | 0.24167  | 1247.341 | 1802.627 | 1526.435 | 1276.777 | 1379.726 | 1323.558 |
| 17624 | NR1H2     | 2032.294 | -0.20148 | 0.143717 | -1.40192 | 0.160939 | 0.24309  | 2322.298 | 1705.188 | 2496.98  | 1881.683 | 1811.827 | 1975.79  |
| 16693 | MARCHF9   | 609.1964 | -0.20159 | 0.130601 | -1.54358 | 0.122691 | 0.195396 | 680.8605 | 622.9546 | 653.9875 | 562.496  | 536.9168 | 597.9628 |
| 16193 | RNF44     | 1327.044 | -0.20165 | 0.123866 | -1.62796 | 0.103533 | 0.169976 | 1288.539 | 1578.736 | 1396.333 | 1167.402 | 1193.624 | 1337.628 |
| 22436 | LOC103215 | 73.37938 | -0.20167 | 0.309939 | -0.65067 | 0.515258 | 0.610542 | 89.98634 | 66.78424 | 78.61764 | 66.96381 | 70.59065 | 67.33362 |
| 17467 | PRCC      | 1260.198 | -0.2018  | 0.142489 | -1.41625 | 0.156703 | 0.238476 | 1199.095 | 1615.96  | 1232.14  | 1095.974 | 1165.815 | 1252.204 |
| 22157 | LOC103231 | 98.0246  | -0.20191 | 0.288938 | -0.6988  | 0.484674 | 0.58158  | 90.52842 | 93.60742 | 131.4932 | 93.74933 | 81.28621 | 97.48301 |
| 14065 | STAM2     | 2003.773 | -0.20192 | 0.10093  | -2.00054 | 0.045442 | 0.085892 | 2111.968 | 2294.203 | 2026.665 | 1819.183 | 1863.165 | 1907.451 |
| 19407 | SLC25A20  | 580.5113 | -0.20192 | 0.180794 | -1.11687 | 0.264051 | 0.361654 | 679.7763 | 480.0802 | 707.5588 | 504.4607 | 494.1346 | 617.0574 |
| 21864 | RELT      | 142.5112 | -0.202   | 0.269234 | -0.75026 | 0.453098 | 0.550899 | 175.636  | 107.8401 | 174.6286 | 140.624  | 117.6511 | 138.6872 |
| 12891 | TIA1      | 3654.067 | -0.20206 | 0.091007 | -2.22023 | 0.026403 | 0.05445  | 4030.412 | 3666.564 | 4033.155 | 3352.655 | 3407.603 | 3434.015 |
| 13500 | C2CD5     | 1912.793 | -0.20213 | 0.095944 | -2.10671 | 0.035143 | 0.069206 | 2040.955 | 2085.639 | 2014.838 | 1696.417 | 1828.94  | 1809.968 |
| 22625 | TRIAT-CG  | 85.20007 | -0.20222 | 0.326229 | -0.61987 | 0.535341 | 0.629036 | 96.49137 | 72.25836 | 106.4469 | 87.05295 | 53.47777 | 95.47305 |
| 14969 | MIER1     | 4099.375 | -0.20224 | 0.109915 | -1.83993 | 0.065779 | 0.116823 | 3974.577 | 4959.004 | 4222.394 | 3776.759 | 3987.302 | 3676.215 |
| 12120 | LOC103231 | 4080.199 | -0.20234 | 0.084963 | -2.38145 | 0.017245 | 0.037826 | 4479.802 | 4242.442 | 4374.063 | 3770.062 | 3863.234 | 3751.588 |
| 17211 | GUK1      | 3359.307 | -0.20236 | 0.137961 | -1.46682 | 0.142425 | 0.219999 | 3949.099 | 2838.33  | 3999.76  | 3075.871 | 2956.251 | 3336.532 |
| 16168 | LOC103231 | 8212.737 | -0.2026  | 0.124067 | -1.633   | 0.102468 | 0.168488 | 9903.376 | 7343.529 | 9123.821 | 7444.143 | 7123.239 | 8338.315 |
| 21268 | LOC103221 | 313.7932 | -0.20282 | 0.241511 | -0.8398  | 0.401019 | 0.501254 | 275.922  | 472.4164 | 258.8121 | 261.1589 | 323.0057 | 291.444  |
| 17850 | NDEL1     | 1670.704 | -0.20283 | 0.148163 | -1.36899 | 0.171002 | 0.254683 | 1578.013 | 2209.354 | 1573.744 | 1676.327 | 1514.49  | 1472.295 |
| 21930 | LOC119621 | 102.8788 | -0.20287 | 0.274198 | -0.73986 | 0.459383 | 0.556894 | 122.5115 | 108.935  | 96.70666 | 104.91   | 104.8164 | 79.39338 |
| 15699 | ZC3H15    | 4354.142 | -0.20287 | 0.118185 | -1.71657 | 0.086057 | 0.145731 | 4214.722 | 5457.148 | 4305.881 | 3997.739 | 4177.683 | 3971.679 |
| 19910 | ROMO1     | 1231.913 | -0.20302 | 0.194002 | -1.04646 | 0.295347 | 0.395012 | 1520.552 | 862.1736 | 1573.049 | 1212.045 | 1075.973 | 1147.687 |
| 17572 | ZNF267    | 814.1827 | -0.20311 | 0.144597 | -1.40465 | 0.160125 | 0.242263 | 794.6986 | 1019.828 | 801.4825 | 698.6557 | 776.4972 | 793.9338 |
| 23696 | LOC103231 | 40.49466 | -0.20315 | 0.447507 | -0.45397 | 0.64985  | 0.72908  | 44.45108 | 28.46541 | 57.04997 | 46.87467 | 29.94755 | 36.17926 |
| 16167 | MNAT1     | 1741.131 | -0.20322 | 0.124444 | -1.63305 | 0.102459 | 0.168483 | 1672.336 | 2154.613 | 1762.288 | 1584.81  | 1689.897 | 1582.843 |
| 19549 | DNAJA4    | 335.4429 | -0.20328 | 0.186331 | -1.09095 | 0.275294 | 0.374377 | 349.1036 | 403.9899 | 327.6895 | 252.2303 | 320.8666 | 358.7777 |
| 25818 | LOC119621 | 2.273424 | -0.20335 | 1.721312 | -0.11814 | 0.90596  | 0.932874 | 0.542086 | 6.02153  | 0.695731 | 2.232127 | 2.139111 | 2.009959 |
| 23201 | IGSF5     | 52.82477 | -0.20337 | 0.383912 | -0.52972 | 0.596305 | 0.683306 | 63.96619 | 39.96106 | 65.39875 | 44.64254 | 57.75599 | 45.22408 |
| 18906 | TAF5      | 451.1971 | -0.20344 | 0.169212 | -1.20226 | 0.229264 | 0.322384 | 433.127  | 567.6661 | 450.1382 | 430.8005 | 372.2053 | 453.2457 |
| 25100 | LOC103221 | 7.989677 | -0.20365 | 0.885014 | -0.23011 | 0.818009 | 0.866377 | 9.757555 | 9.853413 | 6.261582 | 4.464254 | 8.556443 | 9.044815 |
| 23803 | LOC119621 | 32.07533 | -0.20366 | 0.467181 | -0.43594 | 0.662882 | 0.740357 | 37.40396 | 28.46541 | 36.87376 | 40.17829 | 21.39111 | 28.13943 |
| 14494 | FAM171A1  | 4244.106 | -0.20373 | 0.10578  | -1.92601 | 0.054103 | 0.099235 | 4796.38  | 4275.286 | 4566.781 | 3783.455 | 3660.018 | 4382.715 |
| 14022 | PRXL2A    | 6097.963 | -0.20376 | 0.10144  | -2.00866 | 0.044574 | 0.08451  | 6294.707 | 7289.883 | 5999.292 | 5698.62  | 5563.827 | 5741.448 |
| 23110 | LOC103241 | 55.62154 | -0.20385 | 0.375832 | -0.54239 |          |          |          |          |          |          |          |          |



|       |           |          |          |          |          |          |          |          |          |          |          |          |          |
|-------|-----------|----------|----------|----------|----------|----------|----------|----------|----------|----------|----------|----------|----------|
| 23788 | LOC103231 | 35.80235 | -0.20394 | 0.465329 | -0.43827 | 0.66119  | 0.738932 | 28.18849 | 37.77142 | 48.00546 | 44.64254 | 32.08666 | 24.11951 |
| 13441 | ERC6L2    | 3767.489 | -0.20402 | 0.096286 | -2.11893 | 0.034096 | 0.067439 | 3879.17  | 4372.178 | 3849.482 | 3390.601 | 3583.01  | 3530.493 |
| 15487 | OAZ1      | 15219.93 | -0.20407 | 0.116825 | -1.74678 | 0.080675 | 0.138487 | 18268.85 | 13622.34 | 16995.33 | 14136.06 | 13561.96 | 14735.01 |
| 25063 | LOC103231 | 9.416519 | -0.20433 | 0.866943 | -0.2357  | 0.813669 | 0.863081 | 10.84173 | 8.211177 | 10.43597 | 11.16063 | 12.83466 | 3.014938 |
| 18426 | PGLS      | 1650.22  | -0.20436 | 0.162072 | -1.2609  | 0.207344 | 0.299156 | 2000.841 | 1418.891 | 1887.519 | 1470.972 | 1292.023 | 1831.073 |
| 13601 | UROS      | 3410.32  | -0.20436 | 0.097836 | -2.08884 | 0.036722 | 0.071778 | 3845.019 | 3360.561 | 3752.775 | 3095.96  | 3110.267 | 3297.338 |
| 15149 | MAP2K1    | 2615.414 | -0.20447 | 0.113226 | -1.80589 | 0.070936 | 0.124478 | 3002.074 | 2670.275 | 2735.616 | 2439.715 | 2160.502 | 2684.3   |
| 14578 | PIK3CD    | 8654.914 | -0.20451 | 0.10706  | -1.91021 | 0.056107 | 0.102321 | 9814.474 | 8539.077 | 9456.381 | 7991.015 | 7234.472 | 8894.068 |
| 18187 | IRAK1BP1  | 380.6922 | -0.20453 | 0.156824 | -1.30419 | 0.192168 | 0.280904 | 383.2551 | 437.382  | 399.3498 | 372.7652 | 365.7879 | 325.6133 |
| 20166 | GLYCTK    | 312.1776 | -0.20457 | 0.204328 | -1.0012  | 0.316729 | 0.417546 | 388.6759 | 256.1887 | 360.3888 | 274.5516 | 271.6671 | 321.5934 |
| 15355 | SS18      | 6096.532 | -0.20471 | 0.115769 | -1.7683  | 0.07701  | 0.13333  | 6061.61  | 7613.951 | 5911.629 | 5513.354 | 5572.383 | 5906.264 |
| 18595 | TAZ       | 2099.634 | -0.20477 | 0.16567  | -1.23604 | 0.216445 | 0.309452 | 2656.765 | 1647.71  | 2444.104 | 1948.647 | 1751.932 | 2148.66  |
| 23161 | LOC119618 | 55.54492 | -0.2048  | 0.382452 | -0.53549 | 0.592308 | 0.67987  | 59.6295  | 53.09895 | 66.79021 | 62.49956 | 29.94755 | 61.30375 |
| 16737 | PKN1      | 2075.132 | -0.20485 | 0.133328 | -1.53642 | 0.124435 | 0.197651 | 2460.53  | 1873.791 | 2337.657 | 1904.004 | 1741.236 | 2133.571 |
| 20920 | LOC103241 | 176.0538 | -0.20495 | 0.230697 | -0.88838 | 0.374334 | 0.475701 | 217.3766 | 149.9908 | 199.6749 | 156.2489 | 156.1551 | 176.8764 |
| 16227 | RIPPLY1   | 705.4536 | -0.20502 | 0.126414 | -1.62178 | 0.10485  | 0.171777 | 748.0792 | 746.6697 | 768.0874 | 649.549  | 712.3239 | 608.0126 |
| 25279 | TRNAV-UA  | 6.498304 | -0.20527 | 1.013777 | -0.20248 | 0.839541 | 0.882915 | 8.131296 | 7.663765 | 4.87012  | 11.16063 | 2.139111 | 5.024897 |
| 14784 | ABTB2     | 3144.051 | -0.20527 | 0.109399 | -1.87635 | 0.060608 | 0.108987 | 3424.902 | 3262.574 | 3422.303 | 2946.408 | 2569.072 | 3239.049 |
| 19254 | ZNF664    | 3629.682 | -0.20532 | 0.179408 | -1.14445 | 0.252435 | 0.348551 | 3035.142 | 5298.946 | 3331.162 | 3283.459 | 3071.763 | 3757.618 |
| 19531 | TMEM1321  | 784.6935 | -0.20544 | 0.187531 | -1.09549 | 0.273304 | 0.372013 | 981.7184 | 608.1745 | 935.063  | 716.5128 | 639.5941 | 827.0981 |
| 14751 | RETREG1   | 1189.702 | -0.20546 | 0.109219 | -1.8812  | 0.059945 | 0.108036 | 1292.334 | 1330.758 | 1200.137 | 1064.725 | 1133.729 | 1116.532 |
| 16722 | ANXA5     | 28869.77 | -0.20547 | 0.133578 | -1.53822 | 0.123996 | 0.197131 | 26490.68 | 38274.49 | 27998.32 | 27307.84 | 27697.2  | 25450.1  |
| 17328 | ZC3H18    | 2612.11  | -0.20576 | 0.142491 | -1.444   | 0.14874  | 0.2282   | 2408.49  | 3480.992 | 2503.937 | 2486.589 | 2378.691 | 2413.961 |
| 16395 | SPRYD7    | 609.491  | -0.20584 | 0.129526 | -1.58921 | 0.112014 | 0.18165  | 611.4734 | 678.2432 | 669.2936 | 553.5675 | 577.5599 | 566.8084 |
| 13107 | PSMC4     | 4369.923 | -0.20589 | 0.094181 | -2.18616 | 0.028804 | 0.058423 | 4903.713 | 4418.708 | 4726.799 | 4017.829 | 3863.234 | 4289.252 |
| 18779 | PPIP5K1   | 325.2221 | -0.20606 | 0.168719 | -1.22133 | 0.22196  | 0.314225 | 351.8141 | 382.0934 | 309.6005 | 312.4978 | 305.8928 | 289.4341 |
| 25207 | LOC103241 | 9.573864 | -0.20613 | 0.96413  | -0.2138  | 0.830705 | 0.876083 | 14.09425 | 1.642235 | 15.30609 | 8.928508 | 6.417332 | 11.05477 |
| 22530 | LOC119621 | 67.09631 | -0.20614 | 0.324054 | -0.63614 | 0.524688 | 0.619122 | 84.02339 | 68.97389 | 63.31155 | 58.0353  | 59.8951  | 68.3386  |
| 14489 | MRM2      | 1221.753 | -0.20629 | 0.107039 | -1.9272  | 0.053954 | 0.098997 | 1353.048 | 1255.763 | 1320.498 | 1082.582 | 1150.842 | 1167.786 |
| 19288 | CIAO3     | 704.4028 | -0.20653 | 0.18157  | -1.1375  | 0.25533  | 0.351927 | 812.5875 | 585.1832 | 871.7514 | 564.7281 | 620.3421 | 771.8242 |
| 20119 | POU4F1    | 631.6959 | -0.20654 | 0.204579 | -1.0096  | 0.312688 | 0.413182 | 511.7295 | 922.9363 | 594.1546 | 607.1385 | 607.5074 | 546.7088 |
| 20805 | SLFNL1    | 173.53   | -0.20682 | 0.228923 | -0.90344 | 0.366294 | 0.468057 | 211.4137 | 154.3701 | 192.0219 | 140.624  | 183.9635 | 158.7868 |
| 17951 | ZNF569    | 491.8921 | -0.20695 | 0.153208 | -1.35079 | 0.176763 | 0.261781 | 486.7936 | 593.9418 | 500.2309 | 421.872  | 496.2737 | 452.2408 |
| 14927 | NTS       | 10665.37 | -0.20709 | 0.111996 | -1.84907 | 0.064447 | 0.114773 | 11958.97 | 9820.568 | 12505.08 | 10138.32 | 10342.6  | 9226.717 |
| 12161 | CLASP2    | 4543.791 | -0.20711 | 0.087264 | -2.37336 | 0.017627 | 0.038531 | 4940.575 | 4959.551 | 4711.493 | 4026.757 | 4271.804 | 4352.566 |
| 23206 | LOC119621 | 50.83158 | -0.20718 | 0.391883 | -0.52867 | 0.597037 | 0.683971 | 58.00324 | 52.55153 | 52.87558 | 29.01765 | 66.31243 | 46.22906 |
| 24367 | THB54     | 20.07528 | -0.20751 | 0.590326 | -0.35153 | 0.725194 | 0.791205 | 15.7205  | 25.18094 | 22.95914 | 17.85702 | 25.66933 | 13.06473 |
| 23835 | LOC103231 | 31.18317 | -0.20795 | 0.480965 | -0.43236 | 0.665479 | 0.74225  | 24.39389 | 43.24553 | 32.00364 | 31.24978 | 32.08666 | 24.11951 |
| 25813 | BATF      | 2.316425 | -0.20806 | 1.755396 | -0.11853 | 0.905651 | 0.932749 | 1.626259 | 0.547412 | 5.565851 | 0        | 2.139111 | 4.019918 |
| 19111 | LOC103241 | 263.5443 | -0.20807 | 0.178251 | -1.16726 | 0.243104 | 0.338178 | 286.2216 | 258.9258 | 304.0346 | 227.677  | 248.1368 | 256.2698 |
| 14016 | RNF31     | 2374.253 | -0.20811 | 0.103528 | -2.01017 | 0.044413 | 0.084238 | 2523.954 | 2705.309 | 2411.405 | 2180.788 | 2066.381 | 2357.682 |
| 17556 | INPP5E    | 635.1042 | -0.20826 | 0.148107 | -1.40614 | 0.159683 | 0.2418   | 729.6483 | 622.4072 | 695.0356 | 600.4422 | 504.8301 | 658.2616 |
| 23010 | LOC119621 | 48.05731 | -0.20845 | 0.371536 | -0.56106 | 0.574759 | 0.664057 | 50.41403 | 49.81448 | 54.96278 | 35.71403 | 49.19955 | 48.23901 |
| 18946 | SLC16A14  | 461.4895 | -0.2085  | 0.17444  | -1.19524 | 0.231993 | 0.325532 | 449.3896 | 596.6789 | 435.5278 | 470.9788 | 421.4048 | 394.9569 |
| 23457 | LOC119621 | 38.39545 | -0.20861 | 0.424343 | -0.4916  | 0.623001 | 0.706078 | 34.15144 | 45.98259 | 43.13534 | 29.01765 | 44.92132 | 33.16432 |
| 23892 | LOC103231 | 27.55104 | -0.20863 | 0.492181 | -0.4239  | 0.671641 | 0.747351 | 33.06727 | 23.53871 | 32.69937 | 22.32127 | 23.53022 | 30.14938 |
| 24702 | LOC119621 | 15.46008 | -0.20867 | 0.698535 | -0.29872 | 0.765152 | 0.823479 | 13.01007 | 20.80165 | 15.30609 | 8.928508 | 25.66933 | 9.044815 |
| 15747 | RAD52     | 1145.973 | -0.2087  | 0.122142 | -1.70869 | 0.087508 | 0.147736 | 1298.297 | 1218.539 | 1175.786 | 1015.618 | 979.7127 | 1187.886 |
| 13767 | LOC103231 | 3195.851 | -0.20874 | 0.101653 | -2.05343 | 0.040031 | 0.077302 | 3189.636 | 3654.521 | 3441.783 | 2868.283 | 2847.156 | 3173.725 |
| 23467 | LOC103231 | 40.36391 | -0.2088  | 0.426351 | -0.48975 | 0.624312 | 0.707263 | 47.7036  | 42.69812 | 40.35242 | 22.32127 | 44.92132 | 44.2191  |
| 23866 | AFAP1L2   | 31.15359 | -0.20915 | 0.489326 | -0.42742 | 0.669075 | 0.745301 | 38.48813 | 22.9913  | 38.26523 | 24.5534  | 38.50399 | 24.11951 |
| 17657 | TRMT10B   | 430.7751 | -0.20932 | 0.150026 | -1.39522 | 0.16295  | 0.245343 | 494.9249 | 462.563  | 425.7876 | 406.2471 | 419.2657 | 375.8623 |
| 14791 | ELOVL1    | 3541.196 | -0.20937 | 0.111685 | -1.87465 | 0.06084  | 0.109353 | 4065.106 | 3456.906 | 3878.007 | 3252.209 | 2984.059 | 3610.891 |
| 14615 | LOC103241 | 11329.61 | -0.20941 | 0.109953 | -1.90457 | 0.056835 | 0.103385 | 10975.62 | 13357.4  | 12125.9  | 10176.27 | 9715.841 | 11626.61 |
| 23983 | LOC103221 | 25.28835 | -0.20945 | 0.511531 | -0.40945 | 0.682206 | 0.756221 | 30.89892 | 27.37059 | 23.65487 | 24.5534  | 17.11289 | 28.13943 |
| 12684 | LMO4      | 4233.968 | -0.20947 | 0.092575 | -2.26269 | 0.023655 | 0.049579 | 4614.239 | 4561.583 | 4453.377 | 3888.365 | 3681.409 | 4204.834 |
| 21396 | DYSF      | 126.6836 | -0.20963 | 0.25649  | -0.81732 | 0.413748 | 0.514091 | 136.6058 | 129.7366 | 138.4505 | 120.5349 | 143.3204 | 91.45313 |
| 15682 | RAPH1     | 734.6923 | -0.20967 | 0.121904 | -1.71995 | 0.085441 | 0.144844 | 782.2306 | 821.6651 | 761.1301 | 698.6557 | 646.0114 | 698.4607 |
| 24564 | LOC103241 | 15.68511 | -0.20971 | 0.651828 | -0.32172 | 0.747666 | 0.80918  | 10.84173 | 20.25424 | 19.48048 | 15.62489 | 12.83466 | 15.07469 |
| 16381 | TSPAN12   | 827.5329 | -0.20973 | 0.131775 | -1.59154 | 0.111488 | 0.180936 | 911.2472 | 780.0618 | 970.5453 | 779.0123 | 778.6363 | 745.6948 |
| 17645 | LYPLAL1   | 422.8866 | -0.20974 | 0.150076 | -1.39755 | 0.162248 | 0.244453 | 458.063  | 437.9295 | 464.0528 | 435.2648 | 355.0924 | 386.9171 |
| 13565 | HERC2     | 11577.95 | -0.20982 | 0.100092 | -2.09626 | 0.03606  | 0.07067  | 12438.17 | 12818.2  | 12009.02 | 10080.29 | 10094.46 | 12027.59 |
| 22747 | LOC103221 | 219.9094 | -0.20982 | 0.34903  | -0.60116 | 0.547733 | 0.640149 | 279.7166 | 111.1246 | 314.4706 | 261.1589 | 220.3284 | 132.6573 |
| 13911 | ACAD9     | 3529.218 | -0.20985 | 0.103428 | -2.02894 | 0.042464 | 0.081153 | 4004.392 | 3646.31  | 3713.118 | 3207.566 | 3016.146 | 3587.777 |
| 13704 | E2F6      | 1500.069 | -0.20988 | 0.101517 | -2.06743 | 0.038693 | 0.075063 | 1634.932 | 1646.067 | 1545.219 | 1441.954 | 1343.361 | 1388.882 |
| 16536 | LOC103231 | 3048.254 | -0.20989 | 0.13375  | -1.56924 | 0.116592 | 0.187445 | 2890.405 | 3964.356 | 2955.467 | 2667.392 | 2881.382 | 2930.52  |
| 13798 | SETDB1    | 2614.766 | -0.2099  | 0.102528 | -2.0472  | 0.040639 | 0.0783   | 2856.795 | 2929.748 | 2633.343 | 2341.501 | 2310.24  | 2616.967 |
| 12870 | BROX      | 3046.53  | -0.20991 | 0.094364 | -2.22443 | 0.02612  | 0.053954 | 3182.047 | 3456.358 | 3169.056 | 2752.213 | 2765.87  | 2953.635 |
| 14120 | MAP3K3    | 1734.2   | -0.21    | 0.105499 | -1.99055 | 0.04653  | 0.087606 | 1961.811 | 1815.765 | 1808.206 | 1578.114 | 1518.769 | 1722.535 |
| 15118 | ZC3H11A   | 11184.4  | -0.21002 | 0.116019 | -1.81025 | 0.070257 | 0.123546 | 11145.84 | 14059.18 | 10788.71 | 10180.73 | 10040.99 | 10890.96 |
| 18493 | LOC103231 | 392.9669 | -0.210   |          |          |          |          |          |          |          |          |          |          |



|       |           |          |          |          |          |          |          |          |          |          |          |          |          |
|-------|-----------|----------|----------|----------|----------|----------|----------|----------|----------|----------|----------|----------|----------|
| 24944 | LOC119620 | 10.32813 | -0.21024 | 0.820061 | -0.25637 | 0.797668 | 0.850144 | 16.80468 | 6.568942 | 9.740239 | 13.39276 | 6.417332 | 9.044815 |
| 22462 | LOC119620 | 70.48272 | -0.21035 | 0.324821 | -0.6476  | 0.517244 | 0.612186 | 72.09749 | 83.2066  | 72.35606 | 46.87467 | 77.00798 | 71.35354 |
| 16434 | SMIM7     | 3231.845 | -0.21035 | 0.132852 | -1.58338 | 0.113335 | 0.18334  | 3798.399 | 2808.223 | 3795.215 | 2783.462 | 3212.944 | 2992.829 |
| 14181 | MARCHF6   | 3964.967 | -0.21037 | 0.106248 | -1.97998 | 0.047706 | 0.089433 | 4459.202 | 4274.191 | 4035.938 | 3430.779 | 3480.333 | 4109.361 |
| 22301 | LOC103224 | 77.90921 | -0.21039 | 0.311822 | -0.6747  | 0.499867 | 0.595891 | 101.3702 | 68.42648 | 81.40057 | 71.42806 | 68.45154 | 76.37844 |
| 15038 | PCIF1     | 1114.482 | -0.21044 | 0.115231 | -1.82625 | 0.067813 | 0.119884 | 1222.947 | 1217.991 | 1150.74  | 1026.778 | 951.9042 | 1116.532 |
| 25292 | TRNAF-GA  | 5.332907 | -0.21047 | 1.052003 | -0.20007 | 0.841426 | 0.884442 | 5.96295  | 5.474118 | 5.565851 | 6.696381 | 4.278221 | 4.019918 |
| 14367 | NBAS      | 3668.406 | -0.21049 | 0.107995 | -1.94905 | 0.051289 | 0.094906 | 3924.163 | 4080.955 | 3810.521 | 3281.227 | 3084.598 | 3828.972 |
| 13495 | IAH1      | 1919.557 | -0.21053 | 0.099862 | -2.10816 | 0.035017 | 0.068983 | 2100.043 | 1942.765 | 2132.417 | 1843.737 | 1781.879 | 1716.505 |
| 20077 | RNF223    | 203.3759 | -0.21055 | 0.207181 | -1.01626 | 0.309504 | 0.409831 | 207.6191 | 195.9734 | 251.8548 | 169.6417 | 203.2155 | 191.9511 |
| 12632 | DDOST     | 14956.1  | -0.21069 | 0.092631 | -2.27447 | 0.022937 | 0.048274 | 16772.69 | 14664.07 | 16706.6  | 13801.24 | 13337.36 | 14454.62 |
| 16857 | GNAZ      | 877.3535 | -0.2108  | 0.139287 | -1.51344 | 0.130168 | 0.205287 | 869.5065 | 1097.561 | 857.8368 | 821.4227 | 778.6363 | 839.1579 |
| 13664 | LOC119615 | 1541.541 | -0.21085 | 0.101581 | -2.07569 | 0.037923 | 0.073782 | 1714.619 | 1677.27  | 1570.961 | 1437.49  | 1394.7   | 1454.205 |
| 14742 | ZXDC      | 1971.103 | -0.21088 | 0.112035 | -1.88228 | 0.059798 | 0.107836 | 2253.995 | 1942.217 | 2154.68  | 1772.309 | 1715.567 | 1987.849 |
| 14581 | KLC2      | 1943.188 | -0.21098 | 0.110488 | -1.90956 | 0.05619  | 0.102429 | 2023.066 | 2225.776 | 2008.576 | 1906.236 | 1617.168 | 1878.307 |
| 12064 | ATM       | 7304.246 | -0.21109 | 0.088159 | -2.39439 | 0.016648 | 0.036687 | 7892.778 | 8102.79  | 7523.639 | 6566.918 | 6562.792 | 7176.558 |
| 14658 | PANK1     | 1726.997 | -0.21112 | 0.111357 | -1.8959  | 0.057974 | 0.10514  | 1846.888 | 2031.445 | 1681.583 | 1553.56  | 1621.446 | 1627.062 |
| 14234 | ZDHHHC21  | 2318.687 | -0.21114 | 0.107207 | -1.96949 | 0.048897 | 0.091326 | 2366.207 | 2728.848 | 2373.14  | 2120.521 | 2047.129 | 2276.278 |
| 22058 | LOC119624 | 93.24005 | -0.21127 | 0.295431 | -0.71512 | 0.474533 | 0.571917 | 101.9122 | 85.94365 | 111.317  | 73.66019 | 111.2338 | 75.37346 |
| 16905 | UQCRC1    | 10208.06 | -0.21128 | 0.140328 | -1.50559 | 0.132174 | 0.207858 | 12671.27 | 8758.042 | 11439.22 | 9127.167 | 8543.608 | 10709.06 |
| 15833 | IKBKG     | 3982.369 | -0.21133 | 0.124808 | -1.69327 | 0.090404 | 0.151796 | 4687.421 | 3598.685 | 4540.343 | 3558.01  | 3454.664 | 4055.092 |
| 20313 | KCTD19    | 175.9572 | -0.2114  | 0.216627 | -0.97586 | 0.329133 | 0.430758 | 188.6461 | 195.426  | 185.0645 | 131.6955 | 168.9897 | 185.9212 |
| 24653 | LOC119620 | 14.1738  | -0.21161 | 0.689361 | -0.30697 | 0.758869 | 0.81834  | 11.9259  | 15.32753 | 18.08902 | 20.08914 | 8.556443 | 11.05477 |
| 23153 | LOC103230 | 45.3621  | -0.21167 | 0.394653 | -0.53635 | 0.591716 | 0.679403 | 56.91907 | 39.96106 | 49.39693 | 33.4819  | 49.19955 | 43.21412 |
| 12568 | SDC2      | 9770.266 | -0.21168 | 0.092444 | -2.28985 | 0.022203 | 0.0466   | 10023.72 | 11452.4  | 9979.571 | 9274.488 | 8917.952 | 8973.462 |
| 24540 | LOC119620 | 16.90216 | -0.21171 | 0.65272  | -0.32434 | 0.745678 | 0.807818 | 23.30971 | 17.51718 | 14.61036 | 11.16063 | 10.69555 | 24.11951 |
| 24640 | LOC103230 | 15.20485 | -0.21171 | 0.685133 | -0.30901 | 0.757314 | 0.817107 | 11.9259  | 16.96977 | 20.17621 | 6.696381 | 21.39111 | 14.06971 |
| 13651 | MFSD1     | 1358.995 | -0.21175 | 0.101877 | -2.07848 | 0.037665 | 0.073348 | 1472.849 | 1480.749 | 1422.771 | 1214.277 | 1292.023 | 1271.299 |
| 15512 | LOC103224 | 1564.636 | -0.21181 | 0.121616 | -1.74162 | 0.081575 | 0.139805 | 1579.098 | 1897.877 | 1564.7   | 1410.704 | 1379.726 | 1555.708 |
| 13709 | TUSC2     | 1461.389 | -0.21186 | 0.102496 | -2.06699 | 0.038735 | 0.075117 | 1537.899 | 1624.171 | 1545.915 | 1370.526 | 1289.884 | 1399.936 |
| 13145 | SLC25A38  | 2201.267 | -0.21196 | 0.097156 | -2.18166 | 0.029135 | 0.058923 | 2475.708 | 2279.423 | 2336.962 | 1999.986 | 1982.956 | 2132.566 |
| 21165 | FAAP20    | 387.6374 | -0.21196 | 0.247615 | -0.85601 | 0.39199  | 0.492373 | 474.8677 | 267.6844 | 508.5796 | 372.7652 | 273.8062 | 428.1213 |
| 16003 | HSD17B10  | 3532.788 | -0.21197 | 0.127337 | -1.66466 | 0.09598  | 0.159446 | 4286.277 | 3179.915 | 3914.185 | 3205.334 | 3050.372 | 3560.642 |
| 20625 | SMIM27    | 158.6164 | -0.21206 | 0.22748  | -0.93223 | 0.351217 | 0.452695 | 157.205  | 154.3701 | 200.3706 | 138.3919 | 147.5986 | 153.7619 |
| 24349 | LOC119620 | 21.21011 | -0.21224 | 0.59911  | -0.35425 | 0.723151 | 0.789559 | 30.89892 | 19.70683 | 16.69755 | 20.08914 | 27.80844 | 12.05975 |
| 17909 | ARL4D     | 448.2029 | -0.21232 | 0.156098 | -1.36019 | 0.173769 | 0.257952 | 510.1033 | 416.5804 | 515.5369 | 433.0326 | 414.9875 | 398.9768 |
| 14546 | SCAMP1    | 3841.202 | -0.2126  | 0.110905 | -1.91697 | 0.055242 | 0.100962 | 3846.645 | 4671.612 | 3854.352 | 3343.726 | 3687.827 | 3643.051 |
| 22967 | LOC119620 | 48.95964 | -0.21271 | 0.373935 | -0.56885 | 0.569459 | 0.659166 | 55.29281 | 47.07742 | 56.35424 | 35.71403 | 47.06043 | 52.25893 |
| 25340 | LOC119620 | 4.935275 | -0.21278 | 1.107084 | -0.1922  | 0.847589 | 0.889233 | 4.878777 | 6.568942 | 4.174388 | 6.696381 | 4.278221 | 3.014938 |
| 20597 | CCDC126   | 135.307  | -0.2129  | 0.227049 | -0.9377  | 0.348397 | 0.449684 | 152.3263 | 141.2322 | 142.6249 | 127.2312 | 119.7902 | 128.6374 |
| 17193 | PITPNB    | 2256.71  | -0.21293 | 0.144983 | -1.46868 | 0.141921 | 0.219435 | 2007.888 | 3004.743 | 2256.257 | 2082.574 | 2081.355 | 2107.442 |
| 14033 | CUEDC2    | 2435.087 | -0.21309 | 0.106174 | -2.007   | 0.044749 | 0.08477  | 2676.822 | 2726.111 | 2446.191 | 2256.68  | 2070.659 | 2434.06  |
| 16179 | CUNH2orf1 | 676.1911 | -0.2131  | 0.130715 | -1.63028 | 0.103043 | 0.169318 | 717.1803 | 758.7128 | 706.8631 | 580.353  | 609.6465 | 684.391  |
| 19960 | LOC119620 | 196.4157 | -0.21321 | 0.205796 | -1.03602 | 0.300191 | 0.399815 | 229.3025 | 189.4045 | 212.1981 | 205.3557 | 175.4071 | 166.8266 |
| 19821 | LOC119620 | 511.7911 | -0.21325 | 0.202915 | -1.05094 | 0.293285 | 0.393378 | 656.4666 | 402.8951 | 591.3717 | 513.3892 | 385.0399 | 521.5843 |
| 15992 | HBEGF     | 1175.007 | -0.2133  | 0.127944 | -1.66712 | 0.09549  | 0.158742 | 1172.533 | 1427.103 | 1189.005 | 1006.689 | 1090.946 | 1163.766 |
| 11686 | UBE2N     | 6135.061 | -0.21337 | 0.086227 | -2.47456 | 0.01334  | 0.030348 | 6364.636 | 6893.01  | 6501.61  | 5803.53  | 5773.46  | 5474.123 |
| 17422 | CUNH12orf | 573.5269 | -0.21337 | 0.149672 | -1.4256  | 0.153983 | 0.23497  | 677.608  | 545.7696 | 628.2454 | 495.5322 | 509.1083 | 584.8981 |
| 25899 | LOC119624 | 1.546639 | -0.2135  | 2.043061 | -0.1045  | 0.916773 | 0.94102  | 3.794605 | 0.547412 | 0.695731 | 2.232127 | 0        | 2.009959 |
| 14909 | PPP1R9A   | 7287.404 | -0.21351 | 0.115257 | -1.85249 | 0.063956 | 0.114043 | 7153.914 | 9147.799 | 7175.773 | 6497.722 | 6909.327 | 6839.89  |
| 13670 | DCP2      | 1811.825 | -0.21351 | 0.102918 | -2.07459 | 0.038025 | 0.073395 | 2078.901 | 1924.153 | 1836.035 | 1633.917 | 1666.367 | 1731.58  |
| 13076 | ENPP4     | 1688.903 | -0.21358 | 0.097462 | -2.19138 | 0.028424 | 0.057789 | 1828.457 | 1838.209 | 1777.594 | 1531.239 | 1535.881 | 1622.037 |
| 15565 | MESD      | 3450.464 | -0.21369 | 0.123246 | -1.73383 | 0.082947 | 0.141665 | 3388.582 | 4394.075 | 3333.249 | 3243.281 | 3148.771 | 3194.83  |
| 22333 | LOC119620 | 68.05683 | -0.21371 | 0.319347 | -0.66923 | 0.503352 | 0.599159 | 81.31296 | 67.87906 | 69.57314 | 73.66019 | 55.61688 | 60.29877 |
| 22413 | TRNAC-Ca  | 109.2209 | -0.21381 | 0.326655 | -0.65453 | 0.51277  | 0.608191 | 79.6867  | 170.7925 | 101.5768 | 98.21359 | 100.5382 | 104.5179 |
| 17170 | CDC5L     | 6036.712 | -0.21389 | 0.145335 | -1.47172 | 0.141097 | 0.21844  | 5656.129 | 8259.349 | 5533.847 | 5491.032 | 5726.399 | 5553.517 |
| 14177 | MOCS2     | 1958.479 | -0.21395 | 0.108041 | -1.98027 | 0.047673 | 0.089397 | 1946.632 | 2218.113 | 2140.07  | 1890.612 | 1878.139 | 1677.311 |
| 25868 | LOC119615 | 1.548414 | -0.21397 | 1.971784 | -0.10851 | 0.913588 | 0.938911 | 2.710432 | 1.642235 | 0.695731 | 2.232127 | 0        | 2.009959 |
| 14043 | DDB2      | 1846     | -0.21401 | 0.106677 | -2.00611 | 0.044844 | 0.084889 | 1954.763 | 2158.992 | 1835.339 | 1680.792 | 1698.454 | 1747.659 |
| 14676 | ZBTB11    | 1823.86  | -0.21406 | 0.113075 | -1.89305 | 0.058351 | 0.105701 | 1921.696 | 2111.915 | 1849.254 | 1629.453 | 1578.664 | 1852.177 |
| 17835 | LLGL1     | 1079.075 | -0.2144  | 0.156339 | -1.37136 | 0.170261 | 0.253793 | 1319.98  | 947.5699 | 1215.443 | 899.5472 | 941.2087 | 1150.701 |
| 13204 | ARHGDI4   | 5570.178 | -0.21448 | 0.098921 | -2.16814 | 0.030148 | 0.0607   | 5644.745 | 6235.568 | 6076.518 | 5216.481 | 4710.322 | 5537.437 |
| 26036 | TRNAC-GC  | 0.839722 | -0.21459 | 2.666152 | -0.08049 | 0.93585  | 0.955595 | 0.542086 | 1.094824 | 1.391463 | 0        | 0        | 2.009959 |
| 16579 | TRMT6     | 1232.073 | -0.21461 | 0.137518 | -1.56059 | 0.118622 | 0.190214 | 1217.526 | 1561.218 | 1189.701 | 1107.135 | 1221.432 | 1095.428 |
| 13694 | BCAR3     | 2661.858 | -0.21473 | 0.103775 | -2.06919 | 0.038528 | 0.074797 | 2974.428 | 2845.447 | 2765.532 | 2453.108 | 2250.344 | 2682.29  |
| 22048 | LOC119620 | 115.9336 | -0.21473 | 0.299657 | -0.7166  | 0.473623 | 0.571084 | 92.69677 | 164.2235 | 116.8829 | 87.05295 | 126.2075 | 108.5378 |
| 11889 | ERGIC3    | 8045.666 | -0.21473 | 0.088436 | -2.42811 | 0.015178 | 0.033939 | 9143.913 | 8228.147 | 8562.366 | 7390.572 | 7189.551 | 7759.446 |
| 19728 | SIRT4     | 192.6266 | -0.21499 | 0.20198  | -1.06443 | 0.287136 | 0.386937 | 208.7033 | 186.12   | 225.417  | 178.5702 | 186.1026 | 170.8465 |
| 23213 | LOC103230 | 39.80809 | -0.215   | 0.407582 | -0.52749 | 0.597852 | 0.68466  | 44.99317 | 35.58177 | 48.00546 | 35.71403 | 36.36488 | 38.18922 |
| 19798 | CUNH1orf1 | 954.8742 | -0.21539 | 0.204399 | -1.05378 | 0.291983 | 0.392078 | 1248.425 | 671.6743 | 1161.176 | 828.1191 | 812.8621 | 1006.989 |
| 23786 | RUFY4     | 31.20893 | -0.2155  | 0.491406 |          |          |          |          |          |          |          |          |          |



|       |           |          |          |          |          |          |          |          |          |          |          |          |          |
|-------|-----------|----------|----------|----------|----------|----------|----------|----------|----------|----------|----------|----------|----------|
| 12907 | USP3      | 1661.81  | -0.21593 | 0.097327 | -2.21863 | 0.026512 | 0.054578 | 1775.333 | 1844.23  | 1737.241 | 1558.025 | 1529.464 | 1526.564 |
| 25123 | LOC119623 | 7.183103 | -0.21595 | 0.949611 | -0.22741 | 0.820108 | 0.867798 | 8.673382 | 7.663765 | 6.261582 | 8.928508 | 8.556443 | 3.014938 |
| 19783 | ARHGFE26  | 261.2437 | -0.21599 | 0.204554 | -1.05593 | 0.291    | 0.391042 | 269.959  | 334.4686 | 235.1572 | 270.0874 | 241.7195 | 216.0706 |
| 13779 | SZT2      | 4482.166 | -0.216   | 0.105312 | -2.05109 | 0.040258 | 0.07767  | 4928.649 | 4563.225 | 4968.218 | 4060.239 | 3764.835 | 4607.831 |
| 16514 | GORASP2   | 3384.035 | -0.21606 | 0.137377 | -1.57276 | 0.115774 | 0.186379 | 3086.64  | 4471.26  | 3353.425 | 3147.299 | 3056.789 | 3188.8   |
| 23552 | EPOR      | 34.53004 | -0.21612 | 0.453629 | -0.47642 | 0.633772 | 0.715403 | 41.74065 | 33.39212 | 37.56949 | 22.32127 | 29.94755 | 42.20914 |
| 15073 | SRGAP2    | 4551.61  | -0.21617 | 0.118717 | -1.82093 | 0.068618 | 0.121025 | 4663.027 | 5532.144 | 4487.467 | 4017.829 | 3903.877 | 4705.314 |
| 25548 | LOC10322  | 3.094295 | -0.21619 | 1.371231 | -0.15766 | 0.874723 | 0.910228 | 2.168345 | 3.831883 | 4.174388 | 2.232127 | 2.139111 | 4.019918 |
| 23992 | LOC10324  | 24.02057 | -0.21621 | 0.530429 | -0.40762 | 0.683555 | 0.757432 | 31.44101 | 19.15941 | 26.43779 | 22.32127 | 25.66933 | 19.09461 |
| 11733 | ARHGAP25  | 24717.02 | -0.21653 | 0.08792  | -2.46276 | 0.013787 | 0.031239 | 25400    | 28675.62 | 25632.83 | 22386    | 22599.7  | 23607.97 |
| 18440 | CNTLN     | 1592.712 | -0.21664 | 0.172171 | -1.25829 | 0.208287 | 0.300288 | 1414.303 | 2278.328 | 1442.251 | 1484.364 | 1505.934 | 1431.091 |
| 16068 | PLA2G6    | 563.9129 | -0.21676 | 0.13109  | -1.65348 | 0.098232 | 0.162528 | 627.736  | 581.8988 | 610.8521 | 508.925  | 513.3866 | 540.679  |
| 25010 | LOC10323  | 10.56237 | -0.21681 | 0.888345 | -0.24406 | 0.807181 | 0.858013 | 12.46799 | 7.116354 | 13.91463 | 4.464254 | 21.39111 | 4.019918 |
| 24725 | LOC11961  | 11.43583 | -0.21689 | 0.735264 | -0.29498 | 0.768011 | 0.825786 | 12.46799 | 11.49565 | 12.52316 | 13.39276 | 10.69555 | 8.039836 |
| 15861 | AMACR     | 687.1709 | -0.21722 | 0.128602 | -1.68912 | 0.091197 | 0.152859 | 745.9108 | 717.6569 | 752.7813 | 691.9594 | 577.5599 | 637.157  |
| 17527 | RBM42     | 1573.713 | -0.21729 | 0.153879 | -1.41206 | 0.157933 | 0.239678 | 1891.881 | 1394.258 | 1796.378 | 1408.472 | 1242.823 | 1708.465 |
| 13121 | TPD52L2   | 5332.47  | -0.21731 | 0.099518 | -2.18365 | 0.028988 | 0.058733 | 6025.832 | 5306.61  | 5874.06  | 4890.59  | 4605.505 | 5292.222 |
| 16342 | GAREM2    | 676.6534 | -0.21757 | 0.13624  | -1.59699 | 0.110269 | 0.179384 | 683.5709 | 742.2904 | 761.8259 | 555.7996 | 631.0376 | 685.396  |
| 14435 | RABGAP1   | 3130.494 | -0.2176  | 0.112308 | -1.93753 | 0.052681 | 0.097023 | 3263.36  | 3777.689 | 3061.218 | 2841.498 | 2750.896 | 3088.302 |
| 13431 | ZNF559    | 1621.8   | -0.21761 | 0.102601 | -2.12091 | 0.03393  | 0.067163 | 1793.222 | 1655.921 | 1784.551 | 1424.097 | 1544.438 | 1528.574 |
| 24194 | LOC10324  | 24.19065 | -0.21765 | 0.581105 | -0.37454 | 0.708    | 0.77795  | 24.39389 | 37.77142 | 16.00182 | 29.01765 | 12.83466 | 25.12449 |
| 14222 | NEFTIN2   | 1048.309 | -0.21769 | 0.110328 | -1.97312 | 0.048482 | 0.090627 | 1119.408 | 1183.504 | 1079.775 | 959.8146 | 960.4607 | 986.8898 |
| 13120 | HIF1AN    | 4331.663 | -0.21817 | 0.0999   | -2.18384 | 0.028974 | 0.05871  | 4769.818 | 4798.612 | 4415.111 | 3830.33  | 3788.365 | 4387.74  |
| 16986 | PSMA2     | 7082.726 | -0.21822 | 0.146017 | -1.49447 | 0.135053 | 0.211374 | 8948.762 | 5771.91  | 8134.491 | 6428.526 | 6211.977 | 7000.687 |
| 19027 | LOC10323  | 280.2588 | -0.21822 | 0.184962 | -1.17983 | 0.238066 | 0.332632 | 281.8849 | 305.4558 | 313.0791 | 267.8552 | 295.1973 | 218.0805 |
| 25066 | LOC10322  | 8.100038 | -0.21823 | 0.927624 | -0.23526 | 0.814006 | 0.863335 | 11.38381 | 9.306001 | 5.565851 | 11.16063 | 2.139111 | 9.044815 |
| 25380 | LOC10322  | 4.912342 | -0.21824 | 1.181923 | -0.18464 | 0.853508 | 0.894031 | 6.505036 | 3.284471 | 5.565851 | 6.696381 | 6.417332 | 1.004979 |
| 21737 | LOC10324  | 94.14616 | -0.2183  | 0.28302  | -0.77132 | 0.440517 | 0.53878  | 85.10756 | 118.241  | 100.881  | 80.35657 | 89.84265 | 90.44815 |
| 17879 | POLR3K    | 422.1411 | -0.21834 | 0.160042 | -1.36427 | 0.172483 | 0.256472 | 448.3054 | 403.9899 | 507.8839 | 417.4077 | 391.4573 | 363.8026 |
| 14394 | LOC10322  | 1274.384 | -0.21836 | 0.112295 | -1.9445  | 0.051836 | 0.095738 | 1372.021 | 1371.267 | 1375.461 | 1127.224 | 1105.92  | 1294.414 |
| 13044 | SLC30A5   | 3710.663 | -0.2185  | 0.099465 | -2.19675 | 0.028038 | 0.057144 | 4204.964 | 3650.142 | 4122.904 | 3370.512 | 3315.622 | 3599.836 |
| 21106 | LOC10322  | 109.7073 | -0.21861 | 0.25293  | -0.86429 | 0.387427 | 0.488001 | 110.0435 | 126.9995 | 116.1871 | 100.4457 | 109.0946 | 95.47305 |
| 24568 | PLD6      | 19.44286 | -0.2188  | 0.681549 | -0.32103 | 0.748187 | 0.809617 | 16.80468 | 20.25424 | 24.3506  | 24.5534  | 25.66933 | 5.024897 |
| 19970 | IMP2L     | 243.871  | -0.21883 | 0.211599 | -1.03416 | 0.301063 | 0.400789 | 292.1846 | 221.1544 | 269.9438 | 247.7661 | 260.2759 | 181.9013 |
| 23102 | PSORS1C2  | 44.3669  | -0.21889 | 0.402803 | -0.54342 | 0.586842 | 0.675318 | 48.24569 | 54.19377 | 39.65669 | 53.57105 | 36.36488 | 34.1693  |
| 12797 | DDB1      | 18868.49 | -0.21899 | 0.097757 | -2.24014 | 0.025082 | 0.052106 | 20796.06 | 20436.53 | 19670.41 | 17002.11 | 15944.93 | 19360.93 |
| 25702 | LOC10324  | 2.305788 | -0.21899 | 1.629031 | -0.13443 | 0.893063 | 0.923744 | 0.542086 | 2.737059 | 4.174388 | 2.232127 | 2.139111 | 2.009959 |
| 19346 | ZNF579    | 208.973  | -0.21902 | 0.194248 | -1.12754 | 0.259515 | 0.356604 | 219.545  | 215.6803 | 239.3316 | 212.0521 | 173.268  | 193.961  |
| 22539 | LOC11962  | 81.75952 | -0.21909 | 0.345118 | -0.63482 | 0.525549 | 0.619891 | 114.3802 | 60.2153  | 89.74935 | 87.05295 | 57.75599 | 81.40334 |
| 16586 | LACTB2    | 950.8548 | -0.2191  | 0.140475 | -1.55973 | 0.118824 | 0.190457 | 912.3314 | 1176.388 | 978.1983 | 825.887  | 971.1562 | 841.1678 |
| 18239 | YAE1      | 317.296  | -0.21915 | 0.169314 | -1.29436 | 0.195542 | 0.285047 | 319.2889 | 343.2272 | 358.3017 | 312.4978 | 310.171  | 260.2897 |
| 16513 | MORN4     | 551.4046 | -0.21924 | 0.13938  | -1.57296 | 0.115729 | 0.186317 | 597.3792 | 593.3944 | 589.9802 | 448.6575 | 560.447  | 518.5694 |
| 14852 | POLR3A    | 2015.507 | -0.21927 | 0.117758 | -1.86202 | 0.062601 | 0.112055 | 2111.968 | 2186.91  | 2215.904 | 1696.417 | 1741.236 | 2140.606 |
| 16299 | CCNF      | 1229.942 | -0.21929 | 0.136483 | -1.60673 | 0.108113 | 0.176341 | 1413.761 | 1210.328 | 1353.198 | 1089.278 | 992.5473 | 1320.543 |
| 15370 | PPP6R2    | 2709.633 | -0.21947 | 0.124317 | -1.76539 | 0.077498 | 0.134046 | 3097.482 | 2583.236 | 3073.045 | 2426.322 | 2239.649 | 2838.062 |
| 15488 | NEIL3     | 949.4875 | -0.21947 | 0.125663 | -1.74651 | 0.080722 | 0.138558 | 965.4558 | 1132.048 | 969.1538 | 819.1906 | 900.5656 | 910.5114 |
| 14689 | AP5M1     | 2590.94  | -0.21967 | 0.116128 | -1.8916  | 0.058544 | 0.10595  | 2687.122 | 3159.661 | 2519.939 | 2270.073 | 2372.274 | 2536.568 |
| 18192 | ZNF213    | 368.0016 | -0.21967 | 0.168618 | -1.30278 | 0.192651 | 0.281532 | 365.9083 | 426.9812 | 398.6541 | 341.5154 | 293.0582 | 381.8922 |
| 18083 | GPR137    | 407.8219 | -0.21968 | 0.165771 | -1.32519 | 0.185107 | 0.27213  | 469.4468 | 376.0719 | 473.7931 | 352.6761 | 367.927  | 407.0167 |
| 15121 | PPP1R21   | 1580.27  | -0.21977 | 0.121432 | -1.80986 | 0.070318 | 0.12363  | 1674.505 | 1885.834 | 1545.219 | 1341.508 | 1456.734 | 1577.818 |
| 17920 | LSM8      | 652.8084 | -0.21981 | 0.161959 | -1.35717 | 0.174729 | 0.259216 | 647.7932 | 818.3807 | 635.8985 | 631.6919 | 669.5416 | 513.5445 |
| 23456 | TRNAN-GL  | 35.6173  | -0.21985 | 0.44713  | -0.4917  | 0.622931 | 0.706029 | 36.31979 | 37.224   | 40.35242 | 46.87467 | 27.80844 | 25.12449 |
| 18552 | PSMA5     | 3573.007 | -0.21991 | 0.176928 | -1.24294 | 0.21389  | 0.306504 | 4422.883 | 2556.413 | 4555.649 | 3265.602 | 3339.152 | 3298.343 |
| 12746 | ENY2      | 2897.717 | -0.21996 | 0.097775 | -2.2496  | 0.024474 | 0.051047 | 3219.451 | 2872.817 | 3260.197 | 2714.266 | 2716.671 | 2602.897 |
| 24996 | EPHA3     | 9.440279 | -0.22001 | 0.894287 | -0.24601 | 0.805672 | 0.856888 | 7.589209 | 10.40082 | 11.82743 | 6.696381 | 17.11289 | 3.014938 |
| 17413 | MAFK      | 1070.935 | -0.22011 | 0.154191 | -1.42753 | 0.153428 | 0.234243 | 1276.071 | 926.7682 | 1259.274 | 957.5825 | 898.4265 | 1107.487 |
| 12563 | RNF130    | 5190.595 | -0.22017 | 0.096129 | -2.29037 | 0.022    | 0.046555 | 5873.506 | 5500.394 | 5391.222 | 4656.217 | 4528.497 | 5193.734 |
| 12063 | ATL2      | 3447.635 | -0.22035 | 0.092019 | -2.39457 | 0.01664  | 0.036672 | 3899.769 | 3497.961 | 3734.686 | 3113.817 | 3223.64  | 3215.934 |
| 24551 | LOC11962  | 20.74134 | -0.2204  | 0.682117 | -0.32311 | 0.746614 | 0.808469 | 21.68345 | 14.78012 | 29.22072 | 33.4819  | 19.252   | 6.029877 |
| 15388 | ZNF620    | 742.8503 | -0.22047 | 0.125114 | -1.76217 | 0.078041 | 0.134827 | 861.3752 | 750.5016 | 785.4807 | 700.8879 | 684.5154 | 674.3412 |
| 13045 | PDIA6     | 22485.89 | -0.22063 | 0.100446 | -2.19655 | 0.028053 | 0.057168 | 23212.68 | 27153.27 | 22242.53 | 20497.62 | 20225.29 | 21583.94 |
| 22935 | LOC11962  | 45.09219 | -0.22075 | 0.384574 | -0.574   | 0.565965 | 0.656092 | 42.82482 | 50.9093  | 51.48412 | 37.94616 | 49.19955 | 38.18922 |
| 14430 | LOC10324  | 3667.813 | -0.22076 | 0.113883 | -1.9385  | 0.052562 | 0.096837 | 3731.723 | 4487.135 | 3628.935 | 3319.173 | 3212.944 | 3626.971 |
| 18224 | TENT4B    | 716.4509 | -0.22098 | 0.170395 | -1.29687 | 0.194677 | 0.283994 | 687.9076 | 976.5827 | 649.1174 | 651.7811 | 660.9852 | 672.3313 |
| 16001 | MTMR1     | 1127.185 | -0.22111 | 0.132805 | -1.6649  | 0.095932 | 0.159378 | 1129.166 | 1366.887 | 1148.652 | 1037.939 | 934.7914 | 1145.677 |
| 17017 | RFP21     | 761.4455 | -0.22121 | 0.148439 | -1.49027 | 0.136153 | 0.212694 | 909.6209 | 689.7389 | 859.924  | 761.1553 | 641.7332 | 706.5006 |
| 15023 | KFBP8     | 8255.556 | -0.22128 | 0.120983 | -1.82899 | 0.067402 | 0.119275 | 9517.952 | 7559.21  | 9590.657 | 7725.391 | 6843.015 | 8297.11  |
| 18343 | LOC11961  | 377.5657 | -0.22131 | 0.173534 | -1.27534 | 0.202189 | 0.293038 | 393.5547 | 451.6147 | 371.5206 | 321.4263 | 410.7092 | 316.5685 |
| 20188 | MNS1      | 639.6417 | -0.22169 | 0.221952 | -0.99883 | 0.317877 | 0.418604 | 516.0662 | 990.268  | 558.6723 | 636.1562 | 566.8643 | 569.8234 |
| 14246 | BRD3      | 2394.418 | -0.22176 | 0.112649 | -1.96859 | 0.049    | 0.091446 | 2413.369 | 2745.27  | 2583.251 | 2142.842 | 2023.599 | 2458.18  |
| 22912 | NMNAT2    | 65.59651 | -0.22179 | 0.384129 | -0.57738 |          |          |          |          |          |          |          |          |



|       |           |          |          |          |          |          |          |          |          |          |          |          |          |
|-------|-----------|----------|----------|----------|----------|----------|----------|----------|----------|----------|----------|----------|----------|
| 21778 | LOC119621 | 100.4082 | -0.2225  | 0.291582 | -0.76307 | 0.445422 | 0.543739 | 105.7068 | 127.547  | 93.228   | 71.42806 | 91.98176 | 112.5577 |
| 13543 | GOT1      | 2296.81  | -0.22257 | 0.105982 | -2.10004 | 0.035725 | 0.070128 | 2552.143 | 2473.754 | 2403.056 | 1995.522 | 2010.764 | 2345.622 |
| 14895 | SETD7     | 6530.44  | -0.22272 | 0.120051 | -1.8552  | 0.063568 | 0.113435 | 6323.98  | 8328.871 | 6449.43  | 5932.994 | 5895.389 | 6251.977 |
| 10988 | MRPL30    | 5263.954 | -0.22272 | 0.084608 | -2.6324  | 0.008479 | 0.020513 | 5522.776 | 5866.612 | 5615.248 | 4962.018 | 4900.703 | 4716.369 |
| 16704 | RGMB      | 475.1038 | -0.22289 | 0.144551 | -1.54193 | 0.12309  | 0.195903 | 501.972  | 541.3903 | 495.3607 | 417.4077 | 417.1266 | 477.3652 |
| 13073 | TGFA      | 3100.644 | -0.22302 | 0.101734 | -2.19223 | 0.028363 | 0.057678 | 3465.558 | 3311.294 | 3250.457 | 2781.23  | 2656.775 | 3138.551 |
| 15964 | SSB       | 8796.572 | -0.22323 | 0.133479 | -1.67239 | 0.094448 | 0.157284 | 8331.867 | 11725.56 | 8368.257 | 8147.263 | 8259.106 | 7947.378 |
| 19801 | LOC119615 | 185.7204 | -0.22324 | 0.211964 | -1.05319 | 0.292252 | 0.39238  | 208.1612 | 183.383  | 211.5023 | 147.3204 | 168.9897 | 194.966  |
| 14240 | LOC103215 | 49071.64 | -0.22334 | 0.113437 | -1.96885 | 0.04897  | 0.091423 | 49584.64 | 61133.86 | 47873.28 | 44434.95 | 42615.36 | 48787.73 |
| 22263 | LOC103241 | 82.65302 | -0.22347 | 0.328109 | -0.68107 | 0.495827 | 0.592083 | 71.01331 | 108.3875 | 85.57496 | 84.82083 | 89.84265 | 56.27885 |
| 14036 | SYNE1     | 14645.73 | -0.22349 | 0.111357 | -2.00694 | 0.044757 | 0.084771 | 14690    | 17931.57 | 14718.2  | 12803.48 | 12945.9  | 14785.26 |
| 20685 | LOC119621 | 141.5308 | -0.22354 | 0.241946 | -0.92392 | 0.355527 | 0.456954 | 168.0468 | 160.9391 | 127.3188 | 120.5349 | 149.7377 | 122.6075 |
| 20495 | PSTK      | 219.6108 | -0.22354 | 0.235919 | -0.94753 | 0.343367 | 0.445397 | 273.7536 | 171.8873 | 262.9865 | 191.9629 | 233.1631 | 183.9112 |
| 13591 | PSMC3     | 3610.532 | -0.22357 | 0.106895 | -2.09152 | 0.036482 | 0.071361 | 4213.095 | 3695.03  | 3767.385 | 3312.476 | 3048.233 | 3626.971 |
| 13334 | RFFL      | 2492.889 | -0.22363 | 0.104432 | -2.14138 | 0.032244 | 0.064287 | 2590.089 | 2908.946 | 2563.074 | 2241.055 | 2199.006 | 2455.165 |
| 12963 | LOC119615 | 2807.527 | -0.22375 | 0.101212 | -2.21075 | 0.027053 | 0.055482 | 3085.556 | 3133.933 | 2861.543 | 2455.34  | 2504.899 | 2803.893 |
| 21485 | PRKAR1B   | 130.6887 | -0.22394 | 0.277527 | -0.80691 | 0.419719 | 0.51935  | 129.0166 | 145.0641 | 148.8865 | 78.12444 | 160.4333 | 122.6075 |
| 14429 | CRNKL1    | 1861.603 | -0.22399 | 0.115543 | -1.93857 | 0.052554 | 0.096828 | 1940.669 | 2243.294 | 1836.731 | 1647.31  | 1685.619 | 1815.998 |
| 24276 | LOC119621 | 17.18945 | -0.22401 | 0.61351  | -0.36513 | 0.715015 | 0.782985 | 16.80468 | 22.9913  | 15.30609 | 17.85702 | 17.11289 | 13.06473 |
| 16118 | ASPM      | 8883.426 | -0.22416 | 0.136457 | -1.64275 | 0.100435 | 0.165658 | 8372.524 | 11893.62 | 8452.44  | 8002.175 | 7933.961 | 8645.838 |
| 20293 | LOC103221 | 151.7595 | -0.22425 | 0.229057 | -0.97902 | 0.327569 | 0.429134 | 170.7572 | 143.9693 | 173.9328 | 149.5525 | 149.7377 | 122.6075 |
| 14191 | ZNF584    | 1057.441 | -0.22427 | 0.113342 | -1.9787  | 0.04785  | 0.089641 | 1169.822 | 1182.957 | 1065.86  | 1004.457 | 932.6523 | 988.8998 |
| 15939 | UCHL5     | 2528.179 | -0.22435 | 0.133704 | -1.67798 | 0.093352 | 0.155704 | 2425.294 | 3305.82  | 2440.626 | 2366.055 | 2335.909 | 2295.373 |
| 20379 | LOC103227 | 191.3138 | -0.22438 | 0.232514 | -0.96504 | 0.334525 | 0.436398 | 249.3597 | 164.771  | 203.8493 | 200.8914 | 156.1551 | 172.8565 |
| 13737 | BMPRI1A   | 2145.731 | -0.22474 | 0.10898  | -2.06225 | 0.039184 | 0.075827 | 2173.224 | 2577.762 | 2185.988 | 1944.183 | 2021.46  | 1971.77  |
| 13210 | MCM5      | 4735.662 | -0.22493 | 0.103855 | -2.16577 | 0.030329 | 0.061032 | 5405.143 | 4748.797 | 5166.501 | 4174.077 | 4115.649 | 4803.802 |
| 18050 | PKN3      | 303.1311 | -0.22493 | 0.168531 | -1.33466 | 0.181989 | 0.268054 | 339.8882 | 307.6454 | 334.6468 | 285.7123 | 252.4151 | 298.4789 |
| 13322 | PRRC2B    | 10702.34 | -0.22494 | 0.104939 | -2.14354 | 0.03207  | 0.063992 | 10937.13 | 12613.46 | 11062.13 | 9575.825 | 9142.559 | 10882.92 |
| 22854 | PRDM12    | 44.63094 | -0.225   | 0.384584 | -0.58504 | 0.558518 | 0.649696 | 43.909   | 53.09895 | 48.00546 | 40.17829 | 36.36488 | 46.22906 |
| 22024 | LOC119621 | 80.59414 | -0.22511 | 0.311744 | -0.72211 | 0.470229 | 0.567609 | 91.07051 | 92.5126  | 75.13899 | 71.42806 | 94.12087 | 59.29379 |
| 23296 | LOC103241 | 44.54956 | -0.22513 | 0.437324 | -0.51478 | 0.606707 | 0.692368 | 66.13454 | 29.56024 | 48.7012  | 40.17829 | 38.50399 | 44.2191  |
| 14568 | PSMB1     | 6585.108 | -0.22513 | 0.117746 | -1.91201 | 0.055875 | 0.101965 | 7829.896 | 5970.621 | 7496.506 | 6089.242 | 5747.79  | 6376.595 |
| 11933 | UBE3C     | 5828.115 | -0.22516 | 0.093094 | -2.41862 | 0.01558  | 0.034709 | 6506.121 | 6097.62  | 6250.451 | 5153.981 | 5146.7   | 5813.806 |
| 14985 | LRRCA2    | 1630.773 | -0.22517 | 0.122595 | -1.83667 | 0.066259 | 0.11755  | 1851.347 | 1575.999 | 1851.341 | 1504.454 | 1351.918 | 1649.171 |
| 25013 | LOC103231 | 9.827959 | -0.22527 | 0.925574 | -0.24339 | 0.807707 | 0.858469 | 8.131296 | 13.13788 | 9.740239 | 6.696381 | 19.252   | 2.009959 |
| 14706 | HIP1R     | 2776.868 | -0.22545 | 0.119314 | -1.88954 | 0.05882  | 0.106332 | 3175.542 | 2623.745 | 3187.145 | 2524.536 | 2342.326 | 2807.913 |
| 13507 | DAPK3     | 1483.411 | -0.22554 | 0.107085 | -2.10614 | 0.035192 | 0.069266 | 1615.417 | 1561.218 | 1621.75  | 1459.811 | 1251.38  | 1390.892 |
| 24291 | NECAB1    | 21.33673 | -0.22565 | 0.620944 | -0.3634  | 0.716305 | 0.783952 | 18.43094 | 23.53871 | 25.74206 | 22.32127 | 29.94755 | 8.039836 |
| 21827 | LOC103231 | 89.25587 | -0.22582 | 0.298754 | -0.75586 | 0.449731 | 0.547742 | 80.22878 | 114.9565 | 94.61947 | 84.82083 | 68.45154 | 92.45811 |
| 25128 | TRNAH-GU  | 6.556862 | -0.2259  | 0.995436 | -0.22694 | 0.840471 | 0.868044 | 9.215468 | 5.474118 | 6.957314 | 2.232127 | 6.417332 | 9.044815 |
| 19252 | LOC103231 | 286.9863 | -0.22598 | 0.197427 | -1.1446  | 0.252375 | 0.348504 | 278.0903 | 364.5763 | 282.4669 | 305.8014 | 258.8324 | 232.1503 |
| 13966 | DDX1      | 4980.792 | -0.22598 | 0.111952 | -2.01853 | 0.043537 | 0.082874 | 5201.319 | 6051.638 | 4861.771 | 4524.521 | 4306.03  | 4939.474 |
| 14221 | CALCOCO2  | 4630.862 | -0.22603 | 0.114552 | -1.97317 | 0.048476 | 0.090623 | 4678.205 | 5791.617 | 4509.731 | 4189.702 | 4248.274 | 4367.641 |
| 13570 | PRPF6     | 3929.182 | -0.22604 | 0.107902 | -2.09485 | 0.036185 | 0.070889 | 4168.102 | 4613.039 | 3934.361 | 3528.993 | 3366.96  | 3963.639 |
| 13940 | MAP9      | 2297.502 | -0.22608 | 0.111641 | -2.02505 | 0.042862 | 0.081736 | 2288.689 | 2793.99  | 2349.485 | 2073.646 | 2130.554 | 2148.646 |
| 14351 | PPP4C     | 3433.385 | -0.22614 | 0.115822 | -1.95245 | 0.050885 | 0.094257 | 3859.655 | 3490.845 | 3765.298 | 2915.158 | 2926.303 | 3643.051 |
| 13286 | DHX29     | 4194.622 | -0.22624 | 0.105164 | -2.15129 | 0.031454 | 0.062941 | 4319.344 | 5079.434 | 4168.822 | 3796.848 | 3955.216 | 3848.066 |
| 13024 | NEDD8     | 3865.191 | -0.22625 | 0.102837 | -2.20009 | 0.0278   | 0.056747 | 4337.775 | 3713.094 | 4454.072 | 3566.939 | 3495.307 | 3623.956 |
| 16134 | LOC103231 | 1550.448 | -0.22637 | 0.138064 | -1.63962 | 0.101085 | 0.166522 | 1863.151 | 1353.749 | 1799.857 | 1459.811 | 1366.892 | 1459.23  |
| 18348 | LOC119615 | 375.2313 | -0.22647 | 0.177769 | -1.27395 | 0.202683 | 0.293673 | 442.8846 | 433.5502 | 339.5169 | 301.3371 | 357.2315 | 376.8673 |
| 23489 | LOC103221 | 30.08484 | -0.22673 | 0.466089 | -0.48645 | 0.62665  | 0.709219 | 30.35684 | 30.10765 | 37.56949 | 26.78552 | 23.53022 | 32.15934 |
| 18700 | ALDH16A1  | 692.7634 | -0.22685 | 0.184678 | -1.22834 | 0.219318 | 0.311796 | 885.227  | 547.4118 | 810.527  | 665.1738 | 566.8643 | 681.3761 |
| 13439 | CEP97     | 1624.783 | -0.22699 | 0.107085 | -2.1197  | 0.034031 | 0.06732  | 1715.703 | 1867.769 | 1676.713 | 1397.311 | 1529.464 | 1561.738 |
| 18559 | CACNB1    | 267.9266 | -0.2271  | 0.182883 | -1.24177 | 0.214321 | 0.307006 | 252.6122 | 295.6024 | 319.3407 | 254.4625 | 235.3022 | 250.2399 |
| 16177 | POLR1G    | 1177.743 | -0.22722 | 0.139352 | -1.63055 | 0.102985 | 0.169243 | 1150.849 | 1500.456 | 1162.567 | 1058.028 | 1026.773 | 1167.786 |
| 17403 | FDXR      | 817.0659 | -0.22724 | 0.159004 | -1.42916 | 0.152959 | 0.233662 | 1061.947 | 713.825  | 868.9685 | 725.4413 | 759.3843 | 772.8292 |
| 25008 | LOC119621 | 10.61204 | -0.22726 | 0.930859 | -0.24414 | 0.80712  | 0.857985 | 15.17842 | 6.568942 | 11.82743 | 6.696381 | 21.39111 | 2.009959 |
| 23500 | LOC103221 | 29.84316 | -0.22745 | 0.469372 | -0.48459 | 0.627967 | 0.710405 | 34.15144 | 27.918   | 34.09084 | 24.5534  | 34.22577 | 24.11951 |
| 15518 | PIK3C2A   | 7756.647 | -0.22746 | 0.130734 | -1.73983 | 0.081889 | 0.14029  | 7334.971 | 10230.03 | 7536.858 | 7145.038 | 6877.241 | 7415.744 |
| 12846 | SCN8A     | 1395.865 | -0.22748 | 0.102027 | -2.2296  | 0.025774 | 0.05334  | 1508.626 | 1562.861 | 1445.034 | 1279.009 | 1296.301 | 1283.359 |
| 11101 | RBBP7     | 7516.824 | -0.22757 | 0.087363 | -2.60484 | 0.009192 | 0.022013 | 8370.356 | 7966.484 | 7994.649 | 6892.808 | 6556.374 | 7320.27  |
| 13218 | RAPGEF2   | 3514.132 | -0.22776 | 0.105214 | -2.16475 | 0.030407 | 0.061157 | 3692.692 | 4207.407 | 3475.178 | 3133.906 | 3212.944 | 3362.661 |
| 23098 | LOC103221 | 42.78362 | -0.22807 | 0.418636 | -0.5448  | 0.585892 | 0.674341 | 51.49821 | 32.84471 | 54.96278 | 37.94616 | 34.22577 | 45.22408 |
| 16194 | GTF2IRD2E | 438.2745 | -0.22812 | 0.140134 | -1.62788 | 0.10355  | 0.169994 | 481.3727 | 475.7009 | 461.2699 | 404.015  | 404.2919 | 402.9968 |
| 12603 | ECH1      | 1824.949 | -0.22826 | 0.100027 | -2.28194 | 0.022493 | 0.047446 | 1974.821 | 2038.562 | 1897.955 | 1616.06  | 1653.533 | 1768.764 |
| 15807 | RBM38     | 616.6124 | -0.22828 | 0.134309 | -1.6997  | 0.089188 | 0.150001 | 713.9277 | 617.4805 | 667.2064 | 551.3354 | 549.7514 | 599.9727 |
| 13968 | CAPRIN1   | 14882.1  | -0.22846 | 0.113189 | -2.01841 | 0.043549 | 0.082886 | 14771.31 | 18736.26 | 14668.8  | 13312.41 | 13499.93 | 14303.87 |
| 23678 | LOC119621 | 26.08701 | -0.22853 | 0.500331 | -0.45675 | 0.647849 | 0.727386 | 32.52518 | 22.44388 | 29.22072 | 24.5534  | 25.66933 | 22.10955 |
| 24859 | LOC119621 | 9.227259 | -0.22892 | 0.841724 | -0.27196 | 0.785652 | 0.840167 | 5.420864 | 12.59047 | 11.82743 | 8.928508 | 8.556443 | 8.039836 |
| 17861 | MTIF3     | 790.984  | -0.22901 | 0.167479 | -1.36737 | 0.171508 | 0.255279 | 707.4227 | 1064.716 | 791.0466 | 694.1915 | 701.6283 | 786.8989 |
| 15148 | MOGS      | 3281     |          |          |          |          |          |          |          |          |          |          |          |



|       |           |          |          |          |          |          |          |          |          |          |          |          |          |
|-------|-----------|----------|----------|----------|----------|----------|----------|----------|----------|----------|----------|----------|----------|
| 14232 | TARS2     | 1284.881 | -0.2293  | 0.116387 | -1.97017 | 0.048819 | 0.091192 | 1389.367 | 1478.559 | 1296.148 | 1196.42  | 1084.529 | 1264.264 |
| 11552 | UBE2D2    | 3497.889 | -0.22951 | 0.091657 | -2.50399 | 0.01228  | 0.028258 | 3677.514 | 3852.137 | 3794.519 | 3102.657 | 3428.994 | 3131.516 |
| 16282 | CUNH1orf  | 996.8538 | -0.22952 | 0.142485 | -1.6108  | 0.107223 | 0.175073 | 1029.964 | 1179.125 | 1023.421 | 964.2789 | 757.2452 | 1027.089 |
| 23629 | LOC119623 | 30.90881 | -0.22952 | 0.494481 | -0.46416 | 0.642536 | 0.722918 | 31.44101 | 38.31883 | 32.00364 | 20.08914 | 21.39111 | 42.20914 |
| 16861 | ZFAND2A   | 501.005  | -0.22956 | 0.151731 | -1.51296 | 0.130289 | 0.205417 | 590.3321 | 491.0284 | 541.9747 | 497.7643 | 408.5701 | 476.3603 |
| 17552 | BM25      | 9662.695 | -0.22958 | 0.163201 | -1.40673 | 0.159506 | 0.241595 | 8645.193 | 13999.51 | 8645.158 | 8573.6   | 9037.743 | 9074.965 |
| 13579 | DMWD      | 1614.869 | -0.22975 | 0.109785 | -2.0927  | 0.036376 | 0.071212 | 1677.215 | 1726.537 | 1832.556 | 1450.883 | 1384.005 | 1618.017 |
| 16945 | LOC103234 | 375.4095 | -0.22976 | 0.153185 | -1.49991 | 0.133638 | 0.209664 | 402.7702 | 380.4512 | 433.4406 | 348.2118 | 335.8404 | 351.7428 |
| 13862 | GPR153    | 1368.779 | -0.23014 | 0.112973 | -2.03713 | 0.041637 | 0.079848 | 1427.855 | 1542.059 | 1463.819 | 1361.597 | 1138.007 | 1279.339 |
| 16019 | LOC103227 | 1659.456 | -0.23023 | 0.138516 | -1.66214 | 0.096484 | 0.160124 | 1663.663 | 2137.643 | 1576.527 | 1410.704 | 1523.047 | 1645.151 |
| 15946 | CAMKK1    | 752.4078 | -0.23031 | 0.137368 | -1.67657 | 0.093626 | 0.156092 | 893.3583 | 709.9931 | 835.5734 | 658.4775 | 699.4892 | 717.5553 |
| 13856 | CDKN2AIP1 | 1314.805 | -0.23034 | 0.112998 | -2.03844 | 0.041506 | 0.079637 | 1492.364 | 1345.538 | 1424.162 | 1245.527 | 1105.92  | 1275.319 |
| 22017 | LOC103233 | 67.98346 | -0.23035 | 0.318508 | -0.72321 | 0.469549 | 0.566974 | 65.05036 | 74.44801 | 80.70484 | 55.80317 | 70.59065 | 61.30375 |
| 13744 | NAV1      | 3310.58  | -0.23036 | 0.111764 | -2.06114 | 0.039289 | 0.075998 | 3269.323 | 3946.292 | 3513.443 | 2970.961 | 2845.017 | 3318.442 |
| 13676 | POLDIP3   | 2848.298 | -0.23047 | 0.111167 | -2.07321 | 0.038152 | 0.074165 | 3299.138 | 2919.895 | 3014.604 | 2551.321 | 2389.387 | 2915.445 |
| 20093 | LOC119623 | 179.4116 | -0.23051 | 0.227381 | -1.01374 | 0.310706 | 0.411095 | 215.2083 | 176.814  | 192.7176 | 149.5525 | 141.1813 | 200.9959 |
| 18589 | LOC103246 | 244.9665 | -0.23062 | 0.186503 | -1.23657 | 0.216247 | 0.309266 | 248.8176 | 258.3784 | 283.8584 | 249.9982 | 226.7457 | 202.0009 |
| 16528 | CYB5D1    | 770.9958 | -0.23066 | 0.146884 | -1.57037 | 0.11633  | 0.18712  | 752.4159 | 981.5094 | 765.3045 | 671.8702 | 710.1847 | 744.6898 |
| 23387 | ABCC8     | 42.31112 | -0.23085 | 0.461211 | -0.50052 | 0.616707 | 0.701033 | 45.53526 | 42.15071 | 47.30973 | 60.26743 | 38.50399 | 20.09959 |
| 17711 | CRKL      | 516.0572 | -0.23094 | 0.167031 | -1.38264 | 0.166777 | 0.250339 | 493.2986 | 664.5579 | 516.9284 | 450.8897 | 447.0741 | 523.5943 |
| 23588 | DCAF4L1   | 34.34973 | -0.23096 | 0.490861 | -0.47051 | 0.637988 | 0.719048 | 44.45108 | 33.93953 | 31.30791 | 31.24978 | 47.06043 | 18.08963 |
| 14512 | APEX1     | 6542.712 | -0.23101 | 0.120228 | -1.92143 | 0.054678 | 0.100166 | 6454.622 | 8363.358 | 6378.465 | 6180.76  | 5762.764 | 6116.305 |
| 23108 | LOC103236 | 39.49229 | -0.23105 | 0.425834 | -0.54257 | 0.587424 | 0.675812 | 47.7036  | 42.69812 | 36.17803 | 46.87467 | 36.36488 | 27.13445 |
| 17873 | BASP1     | 1640.244 | -0.2311  | 0.169237 | -1.36554 | 0.172084 | 0.255965 | 1520.552 | 2335.259 | 1456.861 | 1475.436 | 1585.081 | 1468.275 |
| 15351 | GGA1      | 957.0118 | -0.2313  | 0.130684 | -1.76993 | 0.076739 | 0.132897 | 1067.91  | 979.8671 | 1060.295 | 794.6372 | 836.3923 | 1002.97  |
| 19702 | MRPL54    | 497.3229 | -0.23138 | 0.216352 | -1.06947 | 0.284857 | 0.384374 | 595.7529 | 350.891  | 665.1192 | 470.9788 | 444.935  | 456.2607 |
| 19627 | ZKSCAN3   | 181.1124 | -0.23141 | 0.213993 | -1.08137 | 0.279533 | 0.378631 | 194.609  | 201.995  | 189.9347 | 138.3919 | 198.9373 | 162.8067 |
| 22186 | LOC103246 | 96.94159 | -0.23161 | 0.333626 | -0.69422 | 0.487545 | 0.584215 | 108.4173 | 91.96518 | 111.317  | 75.89232 | 134.764  | 59.29379 |
| 20663 | LOC103227 | 120.3911 | -0.23167 | 0.249883 | -0.9271  | 0.353876 | 0.455296 | 144.7371 | 115.5039 | 130.7975 | 98.21359 | 115.512  | 117.5826 |
| 12093 | DDX41     | 4175.372 | -0.23183 | 0.097061 | -2.38846 | 0.016919 | 0.037194 | 4541.6   | 4532.022 | 4463.117 | 3908.454 | 3484.611 | 4122.426 |
| 21023 | LOC119627 | 110.8726 | -0.23183 | 0.264367 | -0.87693 | 0.380525 | 0.481199 | 105.1648 | 134.1159 | 118.9701 | 120.5349 | 91.98176 | 94.46807 |
| 13842 | PRPS2     | 1899.926 | -0.23193 | 0.113612 | -2.04142 | 0.041209 | 0.07914  | 1966.689 | 2285.992 | 1907.695 | 1709.809 | 1679.202 | 1850.167 |
| 11126 | LITAF     | 4212.954 | -0.23197 | 0.089319 | -2.59713 | 0.009401 | 0.022462 | 4534.552 | 4763.03  | 4358.061 | 3743.277 | 3891.042 | 3987.759 |
| 14228 | BRAF      | 4166.954 | -0.23198 | 0.117686 | -1.97115 | 0.048707 | 0.091009 | 4164.85  | 5213.55  | 4127.078 | 3575.867 | 3963.772 | 3956.604 |
| 18032 | ARID3A    | 417.4255 | -0.23199 | 0.173493 | -1.33718 | 0.181163 | 0.267093 | 404.9385 | 521.136  | 428.5705 | 410.7114 | 325.1448 | 414.0515 |
| 19534 | TEDC1     | 852.2387 | -0.23213 | 0.211957 | -1.09519 | 0.273435 | 0.372135 | 1072.247 | 596.1315 | 1096.473 | 801.3336 | 658.8461 | 888.4019 |
| 22527 | LOC119627 | 65.28617 | -0.23217 | 0.364685 | -0.63663 | 0.524369 | 0.618842 | 53.66655 | 84.30142 | 71.66033 | 71.42806 | 68.45154 | 42.20914 |
| 20454 | LOC119627 | 137.4848 | -0.23224 | 0.243671 | -0.95309 | 0.340544 | 0.44262  | 138.7741 | 167.508  | 139.842  | 102.6778 | 145.4595 | 130.6473 |
| 12495 | TBC1D5    | 4635.434 | -0.23228 | 0.100882 | -2.3025  | 0.021307 | 0.045334 | 4858.72  | 5483.424 | 4685.055 | 4249.97  | 4047.197 | 4488.238 |
| 12983 | TSPYL4    | 1378.54  | -0.2324  | 0.105303 | -2.207   | 0.027314 | 0.055931 | 1550.367 | 1481.844 | 1439.468 | 1245.527 | 1221.432 | 1332.603 |
| 15181 | SNW1      | 4004.472 | -0.23241 | 0.129114 | -1.80006 | 0.071851 | 0.125826 | 3976.746 | 5225.046 | 3777.126 | 3712.027 | 3604.401 | 3731.489 |
| 16552 | UPF3A     | 1392.195 | -0.23246 | 0.148509 | -1.56529 | 0.117514 | 0.188745 | 1296.671 | 1860.653 | 1353.893 | 1272.312 | 1313.414 | 1256.224 |
| 24224 | LOC119625 | 20.05149 | -0.23262 | 0.627751 | -0.37055 | 0.710969 | 0.780264 | 15.7205  | 13.6853  | 35.4823  | 20.08914 | 19.252   | 16.07967 |
| 11095 | PSMA1     | 8058.609 | -0.23262 | 0.089241 | -2.60663 | 0.009144 | 0.02191  | 8963.94  | 8055.712 | 9099.471 | 7544.589 | 7409.879 | 7278.061 |
| 23546 | PITPNM3   | 28.55207 | -0.23277 | 0.487831 | -0.47716 | 0.633249 | 0.71498  | 34.15144 | 23.53871 | 35.4823  | 22.32127 | 25.66933 | 30.14938 |
| 20834 | LOC103237 | 260.7089 | -0.23291 | 0.258897 | -0.89963 | 0.368319 | 0.469989 | 228.7604 | 400.158  | 214.2853 | 281.248  | 226.7457 | 213.0556 |
| 23761 | LOC103226 | 25.23062 | -0.23296 | 0.525292 | -0.4435  | 0.657407 | 0.735509 | 29.81475 | 25.18094 | 26.43779 | 15.62489 | 34.22577 | 20.09959 |
| 24011 | LOC103235 | 21.22964 | -0.23307 | 0.575568 | -0.40486 | 0.685578 | 0.759073 | 20.0572  | 31.74989 | 17.39328 | 20.08914 | 14.97377 | 23.11453 |
| 12964 | RHBDF2    | 1414.496 | -0.23311 | 0.105451 | -2.21062 | 0.027062 | 0.055496 | 1569.882 | 1481.844 | 1538.958 | 1258.92  | 1253.519 | 1383.857 |
| 17987 | TMEM187   | 412.4809 | -0.2332  | 0.173278 | -1.3458  | 0.178366 | 0.263627 | 487.3356 | 432.4553 | 423.0047 | 325.8905 | 352.9533 | 453.2457 |
| 19203 | MZT2B     | 1808.617 | -0.23333 | 0.202449 | -1.15255 | 0.249096 | 0.344854 | 2386.264 | 1212.517 | 2265.301 | 1799.094 | 1510.212 | 1678.316 |
| 15406 | RPS20     | 37231.86 | -0.23335 | 0.132667 | -1.75891 | 0.078592 | 0.135607 | 43744.74 | 31268.16 | 45695.64 | 34865.82 | 34418.29 | 33398.48 |
| 16633 | GKAP1     | 470.3784 | -0.23338 | 0.15035  | -1.55221 | 0.120611 | 0.192776 | 475.4097 | 567.1186 | 482.8376 | 406.2471 | 453.4915 | 437.1661 |
| 24953 | ANGPTL2   | 8.387003 | -0.23342 | 0.918878 | -0.25403 | 0.799471 | 0.851759 | 11.9259  | 11.49565 | 3.478657 | 6.696381 | 10.69555 | 6.029877 |
| 24475 | SLC22A14  | 12.64704 | -0.2335  | 0.698762 | -0.33417 | 0.738252 | 0.801898 | 13.01007 | 13.6853  | 13.91463 | 13.39276 | 12.83466 | 9.044815 |
| 14126 | GRAMD1A   | 1939.985 | -0.23352 | 0.117416 | -1.98881 | 0.046722 | 0.087931 | 2263.753 | 1869.959 | 2160.942 | 1797.934 | 1642.837 | 1914.486 |
| 21958 | SELENNOV  | 82.36442 | -0.23352 | 0.317897 | -0.73459 | 0.46259  | 0.560067 | 98.65972 | 81.01695 | 85.57496 | 66.96381 | 102.6773 | 59.29379 |
| 24854 | LOC103237 | 9.169727 | -0.23353 | 0.854008 | -0.27346 | 0.784502 | 0.839143 | 10.29964 | 10.40082 | 8.348776 | 13.39276 | 8.556443 | 4.019918 |
| 12219 | TBCE      | 1714.94  | -0.23361 | 0.098877 | -2.36268 | 0.018143 | 0.039474 | 1832.252 | 1932.911 | 1792.9   | 1573.65  | 1619.307 | 1538.624 |
| 23752 | LOC119618 | 23.78322 | -0.23389 | 0.526151 | -0.44453 | 0.656656 | 0.734994 | 24.93597 | 23.53871 | 27.82925 | 26.78552 | 23.53022 | 16.07967 |
| 25936 | TRNAS-AG  | 1.187026 | -0.23403 | 2.36371  | -0.09901 | 0.921129 | 0.944179 | 2.168345 | 0.547412 | 1.391463 | 0        | 0        | 3.014938 |
| 12612 | ARF1      | 11040.68 | -0.23407 | 0.102654 | -2.28016 | 0.022598 | 0.047631 | 12419.74 | 10990.39 | 12402.11 | 9696.36  | 9516.903 | 11218.59 |
| 19786 | UCN       | 179.7891 | -0.23415 | 0.22184  | -1.05549 | 0.291199 | 0.391263 | 208.7033 | 166.4132 | 210.1109 | 167.4095 | 141.1813 | 184.9162 |
| 12522 | GANAB     | 12849.31 | -0.2342  | 0.101942 | -2.29738 | 0.021597 | 0.045852 | 14296.99 | 13863.2  | 13520.15 | 11290.1  | 10817.48 | 13307.94 |
| 13576 | CHKA      | 3409.526 | -0.23465 | 0.112111 | -2.09302 | 0.036348 | 0.071177 | 4015.234 | 3316.768 | 3733.295 | 2950.872 | 3014.007 | 3426.98  |
| 14335 | TRIP10    | 2690.882 | -0.2348  | 0.120106 | -1.95495 | 0.050589 | 0.09382  | 2781.445 | 3332.096 | 2617.341 | 2504.446 | 2290.988 | 2618.976 |
| 14632 | WIPF2     | 2569.797 | -0.23488 | 0.123551 | -1.90111 | 0.057288 | 0.104087 | 2515.281 | 3256.005 | 2565.857 | 2247.752 | 2395.804 | 2438.08  |
| 22345 | LOC119624 | 60.48932 | -0.23492 | 0.351882 | -0.66762 | 0.504378 | 0.600084 | 78.06044 | 51.45671 | 66.09448 | 64.73168 | 51.33866 | 51.25395 |
| 17937 | LOC103216 | 291.8946 | -0.23495 | 0.173545 | -1.35382 | 0.175793 | 0.260549 | 343.1407 | 320.2359 | 282.4669 | 281.248  | 260.9715 | 263.3046 |
| 15417 | FNTB      | 684.8862 | -0.23511 | 0.133759 | -1.7577  | 0.078798 | 0.135879 | 732.9008 | 785.536  | 707.5588 | 622.76   |          |          |



|       |           |          |          |          |          |          |          |          |          |          |          |          |          |
|-------|-----------|----------|----------|----------|----------|----------|----------|----------|----------|----------|----------|----------|----------|
| 13059 | GPN1      | 2020.419 | -0.23546 | 0.107267 | -2.19506 | 0.028159 | 0.057325 | 2326.093 | 2091.661 | 2143.548 | 1765.612 | 1777.601 | 2017.999 |
| 10263 | PPT1      | 4219.712 | -0.23547 | 0.084158 | -2.79798 | 0.005142 | 0.01332  | 4554.61  | 4606.47  | 4525.037 | 3973.186 | 3895.321 | 3763.648 |
| 17461 | TRIM14    | 1038.749 | -0.2355  | 0.166204 | -1.41692 | 0.156505 | 0.238285 | 936.7252 | 1438.051 | 995.5916 | 968.7431 | 915.5394 | 977.845  |
| 12308 | RMND5A    | 2889.959 | -0.23562 | 0.100572 | -2.34285 | 0.019137 | 0.041335 | 3063.33  | 3326.622 | 2989.558 | 2727.659 | 2457.838 | 2774.748 |
| 13176 | EIF2B5    | 3200.799 | -0.23565 | 0.10837  | -2.17451 | 0.029667 | 0.059854 | 3530.609 | 3575.694 | 3285.939 | 2926.318 | 2631.106 | 3255.129 |
| 16160 | PARP16    | 464.5054 | -0.23572 | 0.144216 | -1.6345  | 0.102153 | 0.168053 | 477.5781 | 538.6532 | 491.8821 | 439.729  | 400.0137 | 439.176  |
| 16811 | ICA1L     | 564.1468 | -0.23573 | 0.154734 | -1.52346 | 0.127643 | 0.201856 | 575.1536 | 713.825  | 539.8875 | 542.4069 | 509.1083 | 504.4997 |
| 13485 | CWF19L1   | 1200.762 | -0.23576 | 0.111733 | -2.11007 | 0.034853 | 0.06871  | 1376.899 | 1249.194 | 1273.884 | 1046.868 | 1090.946 | 1166.781 |
| 15156 | ZCCHC3    | 1005.748 | -0.23585 | 0.130666 | -1.805   | 0.071074 | 0.124671 | 1005.028 | 1214.159 | 1048.467 | 908.4757 | 851.366  | 1006.989 |
| 22998 | SLC6A12   | 51.45268 | -0.23594 | 0.418309 | -0.56403 | 0.572734 | 0.662063 | 59.6295  | 45.98259 | 59.13717 | 55.80317 | 62.03421 | 26.12947 |
| 15208 | CHPT1     | 1624.578 | -0.236   | 0.131472 | -1.79503 | 0.072649 | 0.126997 | 1941.211 | 1485.128 | 1849.254 | 1479.9   | 1384.005 | 1607.967 |
| 24331 | LOC119625 | 14.65372 | -0.23611 | 0.661035 | -0.35718 | 0.720957 | 0.787681 | 14.63633 | 12.59047 | 20.17621 | 15.62489 | 12.83466 | 12.05975 |
| 20186 | SLC44A5   | 124.3943 | -0.23611 | 0.23627  | -0.99932 | 0.317641 | 0.418333 | 129.5586 | 142.8745 | 130.7975 | 116.0706 | 115.512  | 111.5527 |
| 11252 | GMPR2     | 3785.014 | -0.23624 | 0.091938 | -2.56958 | 0.010182 | 0.024055 | 4050.469 | 4356.303 | 3875.919 | 3417.386 | 3516.698 | 3493.309 |
| 15275 | MTMR11    | 950.0945 | -0.23628 | 0.132433 | -1.78414 | 0.0744   | 0.129488 | 1038.095 | 997.9317 | 1053.337 | 883.9223 | 744.4105 | 982.8699 |
| 20858 | LOC103226 | 101.8294 | -0.23628 | 0.263395 | -0.89707 | 0.369679 | 0.471182 | 113.2961 | 117.1461 | 100.1853 | 100.4457 | 83.42532 | 96.47803 |
| 23766 | LOC119625 | 27.13635 | -0.23633 | 0.533713 | -0.4428  | 0.657911 | 0.735949 | 36.31979 | 22.9913  | 27.82925 | 20.08914 | 38.50399 | 17.08465 |
| 15044 | PHPT1     | 2919.867 | -0.2365  | 0.129557 | -1.82543 | 0.067936 | 0.120054 | 3282.333 | 2599.659 | 3596.931 | 2707.57  | 2534.846 | 2797.863 |
| 14299 | LOC103235 | 2607.377 | -0.23654 | 0.120585 | -1.9616  | 0.049809 | 0.092606 | 2960.876 | 2454.047 | 3050.086 | 2515.607 | 2156.224 | 2507.424 |
| 14604 | APH1B     | 1464.063 | -0.23663 | 0.124197 | -1.90531 | 0.05674  | 0.10329  | 1701.067 | 1472.538 | 1585.572 | 1256.687 | 1244.962 | 1523.549 |
| 27180 | LOC119625 | 0.515362 | -0.23673 | 3.974798 | -0.05956 | 0.952507 | NA       | 0        | 0        | 2.087194 | 0        | 0        | 1.004979 |
| 19796 | LOC103226 | 147.0601 | -0.23692 | 0.224799 | -1.05392 | 0.291921 | 0.392028 | 146.9054 | 165.8658 | 166.2798 | 127.2312 | 128.3466 | 147.732  |
| 23074 | LOC119625 | 10622.95 | -0.23693 | 0.43033  | -0.55059 | 0.581916 | 0.670462 | 14069.85 | 8770.632 | 11642.37 | 7725.391 | 5739.234 | 15790.24 |
| 14515 | EPHA2     | 5712.232 | -0.2371  | 0.123471 | -1.92029 | 0.054821 | 0.100407 | 6699.103 | 5411.713 | 6438.298 | 5212.016 | 4596.949 | 5915.309 |
| 13623 | TATDN2    | 1602.846 | -0.23735 | 0.113863 | -2.08448 | 0.037117 | 0.072432 | 1735.218 | 1775.804 | 1698.28  | 1491.061 | 1302.718 | 1613.997 |
| 15039 | SCN2A     | 657.3453 | -0.23738 | 0.130006 | -1.8259  | 0.067866 | 0.119969 | 719.8907 | 753.7861 | 661.6405 | 609.3707 | 573.2817 | 626.1022 |
| 16305 | HOXB7     | 593.2903 | -0.23742 | 0.147832 | -1.60603 | 0.108268 | 0.176529 | 589.2479 | 742.2904 | 594.1546 | 553.5675 | 534.7777 | 545.7039 |
| 13479 | YAP1      | 6084.966 | -0.23762 | 0.112553 | -2.11123 | 0.034752 | 0.068543 | 6129.371 | 7534.029 | 6095.998 | 5359.337 | 5403.394 | 5987.668 |
| 14701 | TRMT2A    | 1612.42  | -0.23765 | 0.125703 | -1.89054 | 0.058686 | 0.106127 | 1912.481 | 1528.374 | 1799.161 | 1444.186 | 1373.309 | 1617.012 |
| 23879 | LOC119618 | 22.43249 | -0.23772 | 0.55778  | -0.42618 | 0.669976 | 0.745883 | 25.47806 | 21.89647 | 25.04633 | 31.24978 | 12.83466 | 18.08963 |
| 14952 | TLCD4     | 588.9173 | -0.23772 | 0.128846 | -1.84498 | 0.06504  | 0.115642 | 629.3623 | 655.7994 | 628.9412 | 537.9426 | 517.6648 | 563.7935 |
| 19091 | ASXL3     | 365.0747 | -0.23774 | 0.202978 | -1.17127 | 0.24149  | 0.336285 | 339.8882 | 495.9551 | 352.7358 | 314.7299 | 295.1973 | 391.942  |
| 13535 | PEX3      | 1092.19  | -0.23778 | 0.113175 | -2.10101 | 0.03564  | 0.070003 | 1225.115 | 1208.685 | 1111.779 | 950.8861 | 1056.721 | 999.9546 |
| 17351 | LOC103234 | 298.4676 | -0.23781 | 0.165253 | -1.43909 | 0.150125 | 0.23002  | 327.4202 | 325.1626 | 315.862  | 256.6946 | 297.3364 | 268.3295 |
| 26618 | LOC119626 | 0.180695 | -0.23782 | 4.048328 | -0.05875 | 0.953154 | NA       | 1.084173 | 0        | 0        | 0        | 0        | 0        |
| 26636 | LOC119626 | 0.180695 | -0.23782 | 4.048328 | -0.05875 | 0.953154 | NA       | 1.084173 | 0        | 0        | 0        | 0        | 0        |
| 26771 | LOC103236 | 0.180695 | -0.23782 | 4.048328 | -0.05875 | 0.953154 | NA       | 1.084173 | 0        | 0        | 0        | 0        | 0        |
| 27147 | LOC119624 | 0.180695 | -0.23782 | 4.048328 | -0.05875 | 0.953154 | NA       | 1.084173 | 0        | 0        | 0        | 0        | 0        |
| 27338 | LOC119625 | 0.180695 | -0.23782 | 4.048328 | -0.05875 | 0.953154 | NA       | 1.084173 | 0        | 0        | 0        | 0        | 0        |
| 27820 | LOC119625 | 0.180695 | -0.23782 | 4.048328 | -0.05875 | 0.953154 | NA       | 1.084173 | 0        | 0        | 0        | 0        | 0        |
| 28084 | WFDC2     | 0.180695 | -0.23782 | 4.048328 | -0.05875 | 0.953154 | NA       | 1.084173 | 0        | 0        | 0        | 0        | 0        |
| 28201 | LOC119618 | 0.180695 | -0.23782 | 4.048328 | -0.05875 | 0.953154 | NA       | 1.084173 | 0        | 0        | 0        | 0        | 0        |
| 28246 | LOC119618 | 0.180695 | -0.23782 | 4.048328 | -0.05875 | 0.953154 | NA       | 1.084173 | 0        | 0        | 0        | 0        | 0        |
| 29269 | LOC119625 | 0.180695 | -0.23782 | 4.048328 | -0.05875 | 0.953154 | NA       | 1.084173 | 0        | 0        | 0        | 0        | 0        |
| 29307 | LOC119625 | 0.180695 | -0.23782 | 4.048328 | -0.05875 | 0.953154 | NA       | 1.084173 | 0        | 0        | 0        | 0        | 0        |
| 29530 | LOC119625 | 0.180695 | -0.23782 | 4.048328 | -0.05875 | 0.953154 | NA       | 1.084173 | 0        | 0        | 0        | 0        | 0        |
| 14624 | PRMT7     | 1363.708 | -0.238   | 0.125061 | -1.90307 | 0.057032 | 0.103678 | 1582.892 | 1431.482 | 1420.683 | 1203.116 | 1123.033 | 1421.041 |
| 21572 | CYP2D8    | 76.36879 | -0.23803 | 0.299985 | -0.79349 | 0.427494 | 0.526837 | 87.27591 | 73.90059 | 86.27069 | 78.12444 | 66.31243 | 66.32864 |
| 19527 | TMEM171   | 183.2446 | -0.23817 | 0.217286 | -1.09611 | 0.273029 | 0.371714 | 185.9356 | 211.301  | 198.9792 | 189.7308 | 132.6249 | 180.8963 |
| 24061 | NTK1      | 28.01868 | -0.23823 | 0.603148 | -0.39498 | 0.692858 | 0.765507 | 33.06727 | 20.25424 | 36.17803 | 26.78552 | 42.78221 | 9.044815 |
| 10079 | LIN7C     | 5798.6   | -0.2384  | 0.083882 | -2.84213 | 0.004481 | 0.01182  | 6175.99  | 6543.761 | 6110.609 | 5374.962 | 5223.708 | 5362.57  |
| 14577 | MLH3      | 697.9468 | -0.23841 | 0.124809 | -1.91019 | 0.056108 | 0.102321 | 754.5842 | 789.3678 | 722.1692 | 671.8702 | 607.5074 | 642.1819 |
| 13910 | TANGO6    | 2255.921 | -0.23853 | 0.117549 | -2.02918 | 0.04244  | 0.081112 | 2558.106 | 2503.862 | 2272.259 | 1908.469 | 1940.173 | 2352.657 |
| 16315 | RNF121    | 1189.873 | -0.23868 | 0.148927 | -1.60265 | 0.109011 | 0.177623 | 1473.391 | 1063.621 | 1332.326 | 1029.011 | 1011.799 | 1229.09  |
| 12189 | TRIM41    | 2267.589 | -0.23871 | 0.100773 | -2.36879 | 0.017846 | 0.038924 | 2380.843 | 2617.176 | 2368.965 | 2118.289 | 1961.564 | 2158.696 |
| 18828 | LOC119625 | 209.5129 | -0.23873 | 0.196609 | -1.21426 | 0.224649 | 0.317203 | 227.1342 | 249.0724 | 204.545  | 198.6593 | 179.6853 | 197.981  |
| 15046 | PPM1K     | 550.9999 | -0.23879 | 0.13083  | -1.82515 | 0.067978 | 0.120112 | 612.5576 | 581.3513 | 595.5461 | 522.3177 | 487.7172 | 506.5097 |
| 25448 | LOC103236 | 3.106045 | -0.23885 | 1.385852 | -0.17235 | 0.863166 | 0.901696 | 5.420864 | 2.737059 | 2.087194 | 2.232127 | 2.139111 | 4.019918 |
| 13119 | RCBTB1    | 1972.703 | -0.23892 | 0.10939  | -2.18408 | 0.028957 | 0.058679 | 2178.103 | 2232.893 | 2001.619 | 1649.542 | 1820.383 | 1953.68  |
| 14566 | PARK7     | 3195.492 | -0.23897 | 0.12496  | -1.9124  | 0.055825 | 0.101888 | 3821.167 | 2849.826 | 3709.64  | 2917.39  | 2859.991 | 3014.938 |
| 16717 | SPINT2    | 5250.966 | -0.23898 | 0.15526  | -1.53923 | 0.123749 | 0.196797 | 6783.127 | 4328.385 | 5948.503 | 4517.825 | 4423.681 | 5504.273 |
| 14149 | ZNF557    | 857.7527 | -0.23898 | 0.120365 | -1.98549 | 0.04709  | 0.088479 | 922.0889 | 934.432  | 932.28   | 709.8164 | 827.8358 | 820.0632 |
| 11440 | PPHLN1    | 2077.434 | -0.239   | 0.094548 | -2.52785 | 0.011476 | 0.026669 | 2186.234 | 2328.142 | 2235.385 | 1859.362 | 1903.808 | 1951.67  |
| 21900 | TRIM62    | 89.17496 | -0.23903 | 0.321201 | -0.74418 | 0.456765 | 0.554457 | 83.4813  | 114.4091 | 94.61947 | 60.26743 | 72.72976 | 109.5428 |
| 21399 | DNAH12    | 100.6991 | -0.23907 | 0.292584 | -0.8171  | 0.413869 | 0.514169 | 104.6227 | 101.2712 | 118.9701 | 87.05295 | 121.9293 | 70.34856 |
| 15305 | GPN3      | 1572.752 | -0.23928 | 0.134518 | -1.77876 | 0.07528  | 0.130753 | 1846.888 | 1394.258 | 1867.343 | 1408.472 | 1499.517 | 1420.036 |
| 15435 | CACNA1B   | 939.4816 | -0.23931 | 0.136395 | -1.75457 | 0.079333 | 0.136643 | 1158.981 | 953.044  | 943.4117 | 790.173  | 855.6443 | 935.6359 |
| 12264 | AKT1S1    | 1656.389 | -0.23932 | 0.101704 | -2.35309 | 0.018618 | 0.040362 | 1837.131 | 1702.998 | 1843.688 | 1459.811 | 1520.908 | 1573.798 |
| 17980 | LOC119625 | 274.7243 | -0.23937 | 0.177764 | -1.34654 | 0.178129 | 0.263373 | 284.0533 | 331.7316 | 276.2054 | 263.391  | 241.7195 | 251.2449 |
| 15352 | CUNH1orf  | 576.3805 | -0.23939 | 0.135298 | -1.76935 | 0.076836 | 0.133057 | 663.5137 | 572.0453 | 635.8985 | 533.4783 | 534.7777 | 518.5694 |
| 15479 | DFFA      | 3440.86  | -0.23944 | 0.136958 | -1.74828 | 0.080416 | 0.138105 | 3333.289 | 4588.953 | 3253.24  | 3267.834 | 3114.545 | 3087.297 |
| 13164 | DESL      | 7588.132 | -0.23955 | 0.109991 | -2.17795 | 0.02941  | 0.059393 | 7847.242 | 9354.173 | 7451.283 | 6535.668 | 7080.456 | 7259.972 |
| 21869 | TMEM123   | 4155.445 | -0.23958 | 0.319444 | -0.75    | 0.453256 | 0.550999 | 3410.807 | 6484.09  |          |          |          |          |



|       |           |          |          |          |          |          |          |          |          |          |          |          |          |
|-------|-----------|----------|----------|----------|----------|----------|----------|----------|----------|----------|----------|----------|----------|
| 25487 | CHRM5     | 2.719608 | -0.23975 | 1.440998 | -0.16638 | 0.867861 | 0.905216 | 2.168345 | 3.284471 | 3.478657 | 2.232127 | 2.139111 | 3.014938 |
| 14968 | SETDB2    | 1079.785 | -0.23978 | 0.130312 | -1.84006 | 0.065759 | 0.116797 | 1109.109 | 1344.991 | 1052.642 | 986.6001 | 1007.521 | 977.845  |
| 13526 | MYSM1     | 3474.336 | -0.23982 | 0.114064 | -2.10247 | 0.035513 | 0.069799 | 3492.12  | 4333.312 | 3462.655 | 3203.102 | 3101.71  | 3253.119 |
| 16606 | CENPC     | 685.5291 | -0.23985 | 0.154101 | -1.55643 | 0.119606 | 0.191482 | 664.5979 | 880.7856 | 683.9039 | 578.1209 | 637.455  | 668.3113 |
| 15076 | ZBTB24    | 1192.516 | -0.23999 | 0.13183  | -1.82041 | 0.068696 | 0.121138 | 1154.102 | 1500.456 | 1218.226 | 1127.224 | 1088.807 | 1066.283 |
| 11425 | DCTN2     | 3439.368 | -0.24002 | 0.094845 | -2.53065 | 0.011385 | 0.026492 | 3720.881 | 3837.904 | 3622.673 | 3042.389 | 3022.563 | 3389.796 |
| 12943 | MRPL19    | 1385.495 | -0.24013 | 0.108417 | -2.21491 | 0.026766 | 0.054978 | 1600.781 | 1458.305 | 1442.947 | 1205.349 | 1326.249 | 1279.339 |
| 14906 | CDKAL1    | 766.1308 | -0.24016 | 0.129613 | -1.85289 | 0.063898 | 0.113962 | 879.2641 | 866.0055 | 743.0411 | 729.9055 | 678.0981 | 700.4707 |
| 15607 | POLE2     | 654.132  | -0.24017 | 0.138951 | -1.72846 | 0.083906 | 0.142926 | 741.0321 | 639.377  | 740.9539 | 638.3883 | 620.3421 | 544.6989 |
| 13563 | MCM2      | 5611.337 | -0.24034 | 0.114639 | -2.09651 | 0.036037 | 0.070637 | 6448.659 | 5720.453 | 6073.039 | 5033.446 | 4526.358 | 5866.065 |
| 19009 | MMACHC    | 240.292  | -0.24036 | 0.20315  | -1.18316 | 0.236746 | 0.331101 | 239.6022 | 304.9084 | 235.1572 | 252.2303 | 196.7982 | 213.0556 |
| 13085 | ZMYM6     | 1535.387 | -0.24037 | 0.109735 | -2.19044 | 0.028492 | 0.057889 | 1594.276 | 1823.976 | 1569.57  | 1426.329 | 1403.257 | 1394.912 |
| 22877 | LOC103222 | 48.41645 | -0.24064 | 0.413172 | -0.58241 | 0.560291 | 0.651097 | 62.88202 | 39.96106 | 52.87558 | 46.87467 | 57.75599 | 30.14938 |
| 16217 | ZNF891    | 399.977  | -0.24069 | 0.148105 | -1.62511 | 0.104139 | 0.170718 | 417.4065 | 437.9295 | 443.1809 | 357.1403 | 391.4573 | 352.7478 |
| 13263 | ANO6      | 5571.797 | -0.24077 | 0.111171 | -2.15533 | 0.031136 | 0.06241  | 5611.678 | 6889.725 | 5609.682 | 4993.268 | 4881.451 | 5444.979 |
| 18119 | CUNH3orf1 | 283.2195 | -0.24081 | 0.182733 | -1.31784 | 0.187556 | 0.27519  | 334.4673 | 312.0247 | 275.5096 | 272.3195 | 224.6066 | 280.3893 |
| 14318 | IFT57     | 2621.457 | -0.24082 | 0.122983 | -1.95814 | 0.050213 | 0.093234 | 2575.994 | 3309.104 | 2630.56  | 2542.393 | 2389.387 | 2281.303 |
| 11985 | GTF3C6    | 1588.154 | -0.24091 | 0.100007 | -2.40894 | 0.015999 | 0.035486 | 1641.98  | 1779.636 | 1738.633 | 1457.579 | 1475.986 | 1435.111 |
| 24068 | LOC119621 | 18.11242 | -0.24107 | 0.610847 | -0.39464 | 0.693107 | 0.765592 | 13.55216 | 21.89647 | 22.95914 | 20.08914 | 17.11289 | 13.06473 |
| 13631 | SLC35D1   | 944.8956 | -0.24108 | 0.115745 | -2.08289 | 0.037262 | 0.072673 | 1044.058 | 1064.716 | 964.2837 | 861.601  | 834.2532 | 900.4616 |
| 22953 | ITIH4     | 38.08461 | -0.24117 | 0.422562 | -0.57073 | 0.568184 | 0.658091 | 37.40396 | 43.79295 | 42.43961 | 26.78552 | 44.92132 | 33.16432 |
| 13189 | GTF3C4    | 2912.449 | -0.24122 | 0.111104 | -2.17114 | 0.02992  | 0.060312 | 3123.502 | 3363.298 | 2987.471 | 2537.928 | 2470.673 | 2991.824 |
| 22259 | ARMH1     | 69.29802 | -0.24139 | 0.354037 | -0.68183 | 0.495346 | 0.591616 | 88.36008 | 52.00412 | 84.87923 | 75.89232 | 51.33866 | 63.31371 |
| 22262 | CCDC62    | 80.94023 | -0.24143 | 0.354456 | -0.68112 | 0.495797 | 0.592075 | 94.32303 | 89.77554 | 75.83472 | 91.51721 | 91.98176 | 42.20914 |
| 24549 | LOC103231 | 11.18143 | -0.24146 | 0.746794 | -0.32333 | 0.746443 | 0.808351 | 10.84173 | 13.13788 | 12.52316 | 6.696381 | 12.83466 | 11.05477 |
| 25337 | LOC119624 | 4.308245 | -0.24163 | 1.253672 | -0.19274 | 0.847163 | 0.888842 | 4.878777 | 4.379295 | 4.87012  | 6.696381 | 0        | 5.024897 |
| 9631  | PPP2R5C   | 5699.498 | -0.24173 | 0.081861 | -2.95298 | 0.003147 | 0.008688 | 6017.701 | 6326.438 | 6182.269 | 5301.302 | 5191.622 | 5177.654 |
| 14902 | AGA       | 957.2984 | -0.24174 | 0.130354 | -1.85452 | 0.063665 | 0.113578 | 1127.54  | 898.8502 | 1086.732 | 879.458  | 857.7834 | 893.4267 |
| 24261 | AMH       | 15.76154 | -0.24216 | 0.659342 | -0.36727 | 0.713418 | 0.781765 | 22.76763 | 15.32753 | 13.2189  | 8.928508 | 19.252   | 15.07469 |
| 12974 | NADK      | 4148.479 | -0.24216 | 0.109672 | -2.20808 | 0.027239 | 0.055815 | 4847.878 | 4160.33  | 4487.467 | 3622.742 | 3544.506 | 4227.949 |
| 14908 | GALE      | 3727.452 | -0.24222 | 0.130747 | -1.85255 | 0.063947 | 0.114035 | 4476.549 | 3547.776 | 4102.032 | 3363.815 | 2954.112 | 3920.425 |
| 15403 | CTCF      | 3761.998 | -0.24242 | 0.137793 | -1.75932 | 0.078524 | 0.135529 | 3651.494 | 5040.568 | 3540.577 | 3468.725 | 3322.039 | 3548.583 |
| 16681 | NELFB     | 2291.678 | -0.24246 | 0.156906 | -1.54524 | 0.122289 | 0.194896 | 2816.139 | 1959.187 | 2682.044 | 2058.021 | 1792.575 | 2442.1   |
| 13217 | TCTN2     | 2180.803 | -0.24249 | 0.112012 | -2.16484 | 0.0304   | 0.061147 | 2276.763 | 2643.999 | 2172.769 | 1955.343 | 1946.591 | 2089.352 |
| 13437 | CDK9      | 2177.154 | -0.24257 | 0.114412 | -2.12017 | 0.033992 | 0.067253 | 2514.739 | 2288.729 | 2284.086 | 1839.273 | 1890.974 | 2245.124 |
| 13989 | SHKBP1    | 822.0223 | -0.24258 | 0.120557 | -2.01216 | 0.044203 | 0.084005 | 892.2742 | 896.6606 | 887.0575 | 774.5481 | 686.6545 | 794.9388 |
| 23390 | NHLRC1    | 27.43158 | -0.24261 | 0.48484  | -0.50039 | 0.6168   | 0.701053 | 24.39389 | 32.84471 | 32.00364 | 24.5534  | 25.66933 | 25.12449 |
| 13707 | SMG6      | 2869.09  | -0.24277 | 0.117445 | -2.06714 | 0.038721 | 0.075099 | 2996.653 | 3529.164 | 2807.972 | 2591.499 | 2464.255 | 2824.997 |
| 23934 | LOC119621 | 25.54512 | -0.24283 | 0.580813 | -0.41809 | 0.67588  | 0.750763 | 30.35684 | 12.59047 | 40.35242 | 22.32127 | 23.53022 | 24.11951 |
| 22673 | IL23A     | 45.04024 | -0.24286 | 0.39718  | -0.61145 | 0.5409   | 0.634227 | 42.28427 | 58.02565 | 45.91827 | 33.4819  | 51.33866 | 39.1942  |
| 8939  | CYP51A1   | 18183.9  | -0.24299 | 0.077518 | -3.13463 | 0.001721 | 0.005118 | 20022.5  | 19935.1  | 19179.92 | 16615.95 | 16340.67 | 17009.28 |
| 19554 | LOC103226 | 173.6577 | -0.24329 | 0.223153 | -1.09026 | 0.275598 | 0.374695 | 187.5619 | 168.6028 | 205.9365 | 169.6417 | 177.5462 | 132.6573 |
| 11922 | NUAK2     | 2337.861 | -0.24335 | 0.100561 | -2.41992 | 0.015524 | 0.034614 | 2589.005 | 2454.047 | 2566.553 | 2149.538 | 1978.677 | 2289.343 |
| 13335 | CUNH7orf1 | 1140.294 | -0.24343 | 0.113691 | -2.14111 | 0.032265 | 0.064325 | 1271.193 | 1273.28  | 1168.133 | 1037.939 | 979.7127 | 1111.507 |
| 11675 | CUNH18orf | 2319.441 | -0.24356 | 0.09834  | -2.47668 | 0.013261 | 0.030197 | 2460.53  | 2619.366 | 2469.846 | 2004.45  | 2111.302 | 2251.154 |
| 12620 | DENND1A   | 1646.435 | -0.24357 | 0.106971 | -2.27699 | 0.022787 | 0.047998 | 1801.895 | 1787.3   | 1773.419 | 1426.329 | 1437.482 | 1652.186 |
| 13743 | ZNF330    | 1186.477 | -0.24357 | 0.118167 | -2.06126 | 0.039278 | 0.075981 | 1232.704 | 1404.111 | 1225.879 | 1013.386 | 1093.086 | 1149.697 |
| 17619 | LOC103214 | 351.2206 | -0.24361 | 0.173891 | -1.40095 | 0.16123  | 0.24309  | 441.8004 | 334.4686 | 367.3462 | 314.7299 | 312.3102 | 336.6681 |
| 13156 | MTA3      | 1652.853 | -0.24362 | 0.111785 | -2.17941 | 0.029302 | 0.059211 | 1716.245 | 1976.704 | 1680.887 | 1491.061 | 1582.942 | 1469.28  |
| 12737 | DMXL2     | 4241.724 | -0.24391 | 0.108368 | -2.25075 | 0.024401 | 0.050927 | 4409.331 | 5163.188 | 4228.655 | 3910.686 | 3664.297 | 4074.187 |
| 27471 | SSMEM1    | 0.181583 | -0.24391 | 4.047743 | -0.06026 | 0.951949 | NA       | 0.542086 | 0.547412 | 0        | 0        | 0        | 0        |
| 27496 | LOC119626 | 0.181583 | -0.24391 | 4.047743 | -0.06026 | 0.951949 | NA       | 0.542086 | 0.547412 | 0        | 0        | 0        | 0        |
| 27876 | LOC119627 | 0.181583 | -0.24391 | 4.047743 | -0.06026 | 0.951949 | NA       | 0.542086 | 0.547412 | 0        | 0        | 0        | 0        |
| 28050 | LOC119618 | 0.181583 | -0.24391 | 4.047743 | -0.06026 | 0.951949 | NA       | 0.542086 | 0.547412 | 0        | 0        | 0        | 0        |
| 28072 | LOC119618 | 0.181583 | -0.24391 | 4.047743 | -0.06026 | 0.951949 | NA       | 0.542086 | 0.547412 | 0        | 0        | 0        | 0        |
| 28094 | LOC103246 | 0.181583 | -0.24391 | 4.047743 | -0.06026 | 0.951949 | NA       | 0.542086 | 0.547412 | 0        | 0        | 0        | 0        |
| 28242 | TRNAI-AAL | 0.181583 | -0.24391 | 4.047743 | -0.06026 | 0.951949 | NA       | 0.542086 | 0.547412 | 0        | 0        | 0        | 0        |
| 28336 | LOC119619 | 0.181583 | -0.24391 | 4.047743 | -0.06026 | 0.951949 | NA       | 0.542086 | 0.547412 | 0        | 0        | 0        | 0        |
| 28379 | LOC119619 | 0.181583 | -0.24391 | 4.047743 | -0.06026 | 0.951949 | NA       | 0.542086 | 0.547412 | 0        | 0        | 0        | 0        |
| 28832 | CUNH12orf | 0.181583 | -0.24391 | 4.047743 | -0.06026 | 0.951949 | NA       | 0.542086 | 0.547412 | 0        | 0        | 0        | 0        |
| 12438 | HLCS      | 4299.399 | -0.24392 | 0.105456 | -2.31303 | 0.020721 | 0.044289 | 4492.812 | 5146.766 | 4351.8   | 3785.687 | 3788.365 | 4230.964 |
| 16106 | USP8      | 6080.361 | -0.24395 | 0.148272 | -1.64528 | 0.099912 | 0.164917 | 5762.378 | 8462.987 | 5554.719 | 5508.889 | 5471.845 | 5721.348 |
| 15069 | HELZ      | 3968.842 | -0.24405 | 0.133963 | -1.82181 | 0.068484 | 0.120821 | 3916.032 | 5240.921 | 3755.558 | 3410.69  | 3724.192 | 3765.658 |
| 12025 | SUMO2     | 6882.466 | -0.24406 | 0.101612 | -2.40192 | 0.016309 | 0.036057 | 6902.386 | 8124.139 | 7356.664 | 6662.899 | 6408.776 | 5839.936 |
| 12010 | EXOC4     | 4054.762 | -0.24408 | 0.101516 | -2.4044  | 0.016199 | 0.035858 | 4259.173 | 4813.939 | 4122.208 | 3602.653 | 3600.123 | 3930.475 |
| 12925 | ZDHHC16   | 1147.286 | -0.24412 | 0.110119 | -2.21689 | 0.02663  | 0.054775 | 1195.3   | 1305.03  | 1234.227 | 1066.957 | 996.8256 | 1085.378 |
| 9323  | SDMO1     | 6273.093 | -0.24419 | 0.080726 | -3.02494 | 0.002487 | 0.007091 | 6874.739 | 6687.183 | 6843.214 | 5823.619 | 5796.99  | 5612.81  |
| 14810 | B4GALT3   | 1201.437 | -0.24433 | 0.130596 | -1.87086 | 0.061364 | 0.110147 | 1313.475 | 1297.913 | 1304.496 | 1107.135 | 928.374  | 1257.229 |
| 21563 | RDH5      | 80.55096 | -0.24435 | 0.307459 | -0.79474 | 0.426767 | 0.526161 | 93.23886 | 70.61612 | 98.09812 | 84.82083 | 64.17332 | 72.35852 |
| 12224 | RNF10     | 3658.045 | -0.24439 | 0.103469 | -2.36195 | 0.018179 | 0.039536 | 4026.618 | 4058.511 | 3825.131 | 3207.566 | 3105.989 | 3724.454 |
| 14438 | SIK2      | 1112.044 | -0.24443 | 0.126201 | -1.93681 | 0.052769 | 0.097165 | 1086.883 | 1350.465 | 1183.439 | 1011.154 | 969.0171 | 1071.308 |
| 13289 | GLE1      | 1891.1   | -0.24447 | 0.11367  | -2.15071 | 0.031499 | 0.063015 | 2239.462 | 1888.911 | 1734.363 | 1602     |          |          |



|       |           |          |          |          |          |          |          |          |          |          |          |          |          |
|-------|-----------|----------|----------|----------|----------|----------|----------|----------|----------|----------|----------|----------|----------|
| 11893 | MED17     | 1785.226 | -0.24506 | 0.100977 | -2.42691 | 0.015228 | 0.03404  | 1999.757 | 1940.027 | 1870.822 | 1700.881 | 1531.603 | 1668.266 |
| 11121 | TM9SF3    | 12988.17 | -0.24515 | 0.094375 | -2.59764 | 0.009387 | 0.022439 | 13755.44 | 15435.92 | 13078.36 | 11631.61 | 11745.86 | 12281.85 |
| 11171 | PCBP2     | 4060.671 | -0.24517 | 0.094783 | -2.58666 | 0.009691 | 0.023063 | 4425.593 | 4407.213 | 4388.673 | 3734.348 | 3420.438 | 3987.759 |
| 16842 | KATNB1    | 1281.299 | -0.24525 | 0.161623 | -1.5174  | 0.129165 | 0.203887 | 1575.845 | 1086.612 | 1512.52  | 1131.688 | 1037.469 | 1343.658 |
| 12550 | PEBP1     | 4327.292 | -0.24546 | 0.107048 | -2.29296 | 0.021851 | 0.046287 | 5050.619 | 4174.015 | 4863.858 | 3915.151 | 3756.278 | 4203.829 |
| 15465 | ZNF780A   | 781.2814 | -0.24552 | 0.140249 | -1.75058 | 0.080019 | 0.137555 | 922.0889 | 774.5877 | 850.1837 | 736.6019 | 620.3421 | 783.884  |
| 15653 | LOC103231 | 1631.555 | -0.24566 | 0.142429 | -1.72479 | 0.084565 | 0.143625 | 1918.986 | 1467.611 | 1929.959 | 1426.329 | 1354.057 | 1692.385 |
| 22597 | LOC103231 | 50.9542  | -0.24587 | 0.393534 | -0.62477 | 0.532123 | 0.626034 | 42.82482 | 65.14201 | 56.35424 | 58.0353  | 49.19955 | 34.1693  |
| 11603 | ACOX1     | 3803.592 | -0.24595 | 0.098635 | -2.49354 | 0.012648 | 0.028978 | 4404.994 | 3917.279 | 4065.158 | 3352.655 | 3351.986 | 3729.479 |
| 15306 | LOC103221 | 560.1526 | -0.24647 | 0.138561 | -1.77878 | 0.075276 | 0.130753 | 571.359  | 595.0366 | 654.6832 | 524.5498 | 536.9168 | 478.3702 |
| 18289 | B9D2      | 358.9041 | -0.24653 | 0.191811 | -1.28525 | 0.198705 | 0.288839 | 436.9216 | 305.4558 | 427.8748 | 341.5154 | 290.9191 | 350.7378 |
| 11090 | KIAA0895  | 3568.164 | -0.2466  | 0.094548 | -2.6082  | 0.009102 | 0.02182  | 3776.716 | 4151.024 | 3692.246 | 3212.031 | 3202.249 | 3374.721 |
| 19464 | LOC119621 | 186.9011 | -0.24672 | 0.222956 | -1.1066  | 0.268466 | 0.366685 | 240.6863 | 173.5295 | 196.1962 | 158.481  | 162.5724 | 189.9411 |
| 17382 | LOC119621 | 359.025  | -0.2468  | 0.172294 | -1.43245 | 0.152014 | 0.232499 | 383.2551 | 421.5071 | 363.8675 | 279.0159 | 382.9008 | 323.6034 |
| 17898 | KRBA2     | 240.7144 | -0.24684 | 0.181282 | -1.36162 | 0.173319 | 0.257442 | 281.8849 | 253.4517 | 249.0718 | 220.9806 | 211.772  | 227.1254 |
| 15904 | SNIP1     | 1132.282 | -0.24688 | 0.146619 | -1.6838  | 0.092219 | 0.154153 | 1169.28  | 1474.727 | 1044.293 | 970.9752 | 1046.025 | 1088.393 |
| 16187 | FBXO11    | 2023.107 | -0.24691 | 0.151583 | -1.62885 | 0.103345 | 0.169731 | 1881.582 | 2777.02  | 1928.567 | 1770.077 | 1925.2   | 1856.197 |
| 23008 | LOC119621 | 42.75605 | -0.24692 | 0.439554 | -0.56174 | 0.574293 | 0.663577 | 57.46116 | 35.58177 | 44.52681 | 44.64254 | 49.19955 | 25.12449 |
| 24485 | SHISA8    | 12.09825 | -0.247   | 0.74153  | -0.3331  | 0.739061 | 0.802433 | 12.46799 | 9.853413 | 17.39328 | 13.39276 | 6.417332 | 13.06473 |
| 13613 | UNG       | 1994.881 | -0.24702 | 0.11837  | -2.0868  | 0.036906 | 0.072071 | 2374.88  | 1928.532 | 2197.815 | 1729.898 | 1758.349 | 1979.81  |
| 17253 | LONRF2    | 442.4886 | -0.24704 | 0.169527 | -1.45725 | 0.145047 | 0.223502 | 456.4367 | 562.7393 | 418.8303 | 444.1933 | 397.8746 | 374.8573 |
| 21859 | DIO2      | 66.36644 | -0.24732 | 0.329308 | -0.75104 | 0.45263  | 0.55049  | 62.33993 | 79.37471 | 73.05179 | 64.73168 | 68.45154 | 50.24897 |
| 22799 | LOC119621 | 40.73107 | -0.24737 | 0.417313 | -0.59276 | 0.553341 | 0.645229 | 33.06727 | 47.07742 | 52.87558 | 37.94616 | 34.22577 | 39.1942  |
| 15413 | BICD1     | 2168.486 | -0.24742 | 0.140704 | -1.75841 | 0.078678 | 0.135732 | 2120.642 | 2897.451 | 2044.059 | 1928.558 | 2002.208 | 2017.999 |
| 11971 | CDC25A    | 1645.339 | -0.2475  | 0.10263  | -2.41161 | 0.015882 | 0.035271 | 1833.878 | 1827.808 | 1698.976 | 1529.007 | 1424.648 | 1557.718 |
| 13304 | TMEM94    | 2254.987 | -0.24757 | 0.115368 | -2.1459  | 0.031881 | 0.063707 | 2587.378 | 2196.764 | 2566.553 | 1982.129 | 1935.895 | 2261.204 |
| 13042 | BABAM2    | 2144.557 | -0.24758 | 0.112695 | -2.19687 | 0.02803  | 0.057132 | 2278.931 | 2598.564 | 2108.762 | 1950.879 | 1893.113 | 2037.093 |
| 14066 | NOL8      | 2449.472 | -0.24766 | 0.123805 | -2.00044 | 0.045453 | 0.085907 | 2475.708 | 3074.812 | 2429.494 | 2046.86  | 2327.352 | 2342.607 |
| 11975 | ZNF236    | 2169.662 | -0.24793 | 0.102832 | -2.41106 | 0.015906 | 0.035313 | 2343.981 | 2523.568 | 2202.686 | 1915.165 | 1957.286 | 2075.283 |
| 13184 | VEGFB     | 1186.34  | -0.24795 | 0.114106 | -2.17294 | 0.029785 | 0.06006  | 1182.832 | 1366.34  | 1315.628 | 1116.063 | 1041.747 | 1095.428 |
| 18739 | LOC103231 | 190.4737 | -0.24795 | 0.202238 | -1.22602 | 0.220192 | 0.312386 | 218.4608 | 206.3743 | 193.4133 | 178.5702 | 188.2417 | 157.7818 |
| 14448 | LARPA     | 6374.861 | -0.24819 | 0.128284 | -1.93468 | 0.05303  | 0.097577 | 6154.849 | 8387.444 | 6224.709 | 5589.246 | 5859.024 | 6033.897 |
| 12448 | COPRS     | 1595.907 | -0.24821 | 0.107385 | -2.31136 | 0.020813 | 0.04445  | 1734.134 | 1603.369 | 1862.473 | 1419.633 | 1484.543 | 1471.219 |
| 15105 | NPHP1     | 722.5597 | -0.24827 | 0.136941 | -1.81294 | 0.069841 | 0.122921 | 739.4058 | 891.7338 | 722.8649 | 662.9417 | 648.1505 | 670.3213 |
| 9418  | EIF2S1    | 5980.263 | -0.24836 | 0.0827   | -3.00319 | 0.002672 | 0.007542 | 6384.693 | 6732.07  | 6364.551 | 5379.426 | 5546.714 | 5474.123 |
| 21241 | LENG1     | 89.49844 | -0.24838 | 0.29457  | -0.84319 | 0.39912  | 0.499534 | 95.94929 | 110.5772 | 84.1835  | 100.4457 | 68.45154 | 77.38342 |
| 14092 | SLC17A2   | 646.0163 | -0.24843 | 0.124444 | -1.99632 | 0.045899 | 0.086591 | 688.9918 | 696.3078 | 718.6905 | 616.067  | 571.1425 | 584.8981 |
| 11485 | MRPL16    | 3035.309 | -0.24846 | 0.098582 | -2.52039 | 0.011722 | 0.027135 | 3487.784 | 3011.312 | 3389.603 | 2776.766 | 2761.592 | 2784.798 |
| 9841  | VDAC2     | 9916.495 | -0.24848 | 0.085791 | -2.8964  | 0.003775 | 0.010197 | 11107.35 | 10574.35 | 10630.08 | 8964.222 | 8633.451 | 9589.514 |
| 14883 | GTFA2A    | 2467.811 | -0.24864 | 0.133816 | -1.85805 | 0.063163 | 0.112845 | 2450.772 | 3232.467 | 2355.746 | 2162.931 | 2365.856 | 2239.094 |
| 15959 | SIPA1     | 609.2465 | -0.24892 | 0.148723 | -1.67371 | 0.094188 | 0.156901 | 604.4263 | 689.1915 | 696.4271 | 558.0317 | 481.2999 | 626.1022 |
| 12081 | RPP14     | 1868.508 | -0.24901 | 0.104167 | -2.39049 | 0.016826 | 0.037026 | 2184.608 | 1908.278 | 1997.445 | 1647.31  | 1717.706 | 1755.699 |
| 13611 | KLF7      | 3618.286 | -0.24905 | 0.119309 | -2.08739 | 0.036853 | 0.07198  | 3555.002 | 4611.397 | 3622.673 | 3328.101 | 3277.118 | 3315.427 |
| 19121 | CUNH19or  | 225.0125 | -0.24919 | 0.213898 | -1.16499 | 0.244025 | 0.339281 | 198.9457 | 296.1498 | 238.6359 | 205.3557 | 198.9373 | 212.0507 |
| 16646 | RFX1      | 408.3336 | -0.24936 | 0.160939 | -1.54939 | 0.121288 | 0.193707 | 480.8306 | 382.0934 | 467.5315 | 383.9258 | 365.7879 | 369.8324 |
| 13829 | STRADA    | 1560.633 | -0.24946 | 0.122031 | -2.04426 | 0.040928 | 0.078671 | 1552.535 | 1946.596 | 1586.268 | 1410.704 | 1439.621 | 1428.076 |
| 17823 | LLGL2     | 765.3184 | -0.24952 | 0.181695 | -1.37329 | 0.169663 | 0.253071 | 970.8767 | 612.5538 | 914.191  | 649.549  | 658.8461 | 785.8939 |
| 11227 | EIF4A1    | 38353.69 | -0.24966 | 0.096961 | -2.57485 | 0.010028 | 0.023749 | 44508.54 | 37594.05 | 42895.32 | 34408.24 | 33566.92 | 37149.07 |
| 10631 | ATP5MC2   | 8136.5   | -0.2497  | 0.092105 | -2.71099 | 0.006708 | 0.016775 | 8571.47  | 9557.81  | 8388.433 | 7593.696 | 7136.073 | 7571.515 |
| 14237 | HIGD1C    | 3444.945 | -0.24998 | 0.126937 | -1.9693  | 0.048918 | 0.091346 | 4185.449 | 3286.113 | 3763.907 | 2997.747 | 2855.713 | 3580.742 |
| 26893 | COG4      | 0.182471 | -0.24999 | 4.047162 | -0.06177 | 0.950747 | NA       | 0        | 1.094824 | 0        | 0        | 0        | 0        |
| 27089 | LOC119621 | 0.182471 | -0.24999 | 4.047162 | -0.06177 | 0.950747 | NA       | 0        | 1.094824 | 0        | 0        | 0        | 0        |
| 27372 | LOC119621 | 0.182471 | -0.24999 | 4.047162 | -0.06177 | 0.950747 | NA       | 0        | 1.094824 | 0        | 0        | 0        | 0        |
| 27646 | TRNAS-CG  | 0.182471 | -0.24999 | 4.047162 | -0.06177 | 0.950747 | NA       | 0        | 1.094824 | 0        | 0        | 0        | 0        |
| 27741 | LOC119621 | 0.182471 | -0.24999 | 4.047162 | -0.06177 | 0.950747 | NA       | 0        | 1.094824 | 0        | 0        | 0        | 0        |
| 28039 | LOC119618 | 0.182471 | -0.24999 | 4.047162 | -0.06177 | 0.950747 | NA       | 0        | 1.094824 | 0        | 0        | 0        | 0        |
| 28486 | KCTD4     | 0.182471 | -0.24999 | 4.047162 | -0.06177 | 0.950747 | NA       | 0        | 1.094824 | 0        | 0        | 0        | 0        |
| 28615 | LOC119621 | 0.182471 | -0.24999 | 4.047162 | -0.06177 | 0.950747 | NA       | 0        | 1.094824 | 0        | 0        | 0        | 0        |
| 28882 | LOC119621 | 0.182471 | -0.24999 | 4.047162 | -0.06177 | 0.950747 | NA       | 0        | 1.094824 | 0        | 0        | 0        | 0        |
| 28911 | LOC119621 | 0.182471 | -0.24999 | 4.047162 | -0.06177 | 0.950747 | NA       | 0        | 1.094824 | 0        | 0        | 0        | 0        |
| 29054 | LOC103241 | 0.182471 | -0.24999 | 4.047162 | -0.06177 | 0.950747 | NA       | 0        | 1.094824 | 0        | 0        | 0        | 0        |
| 29256 | LOC119621 | 0.182471 | -0.24999 | 4.047162 | -0.06177 | 0.950747 | NA       | 0        | 1.094824 | 0        | 0        | 0        | 0        |
| 21132 | ZNF771    | 92.12298 | -0.25001 | 0.290557 | -0.86047 | 0.389533 | 0.490049 | 97.57555 | 106.1979 | 98.09812 | 60.26743 | 94.12087 | 96.47803 |
| 12789 | MRPS17    | 2692.323 | -0.25006 | 0.111569 | -2.24129 | 0.025007 | 0.051983 | 2740.247 | 3234.656 | 2794.057 | 2544.625 | 2586.185 | 2254.169 |
| 21483 | LOC119621 | 223.0239 | -0.25028 | 0.310132 | -0.80701 | 0.419659 | 0.519324 | 286.7637 | 195.426  | 249.7676 | 174.1059 | 115.512  | 316.5685 |
| 9649  | ZDHHC20   | 6144.235 | -0.25035 | 0.084963 | -2.94653 | 0.003214 | 0.008854 | 6604.78  | 6965.268 | 6460.562 | 5618.264 | 5459.01  | 5757.527 |
| 11899 | CDIN1     | 1413.37  | -0.25035 | 0.103229 | -2.42519 | 0.0153   | 0.034185 | 1545.488 | 1586.947 | 1477.038 | 1290.169 | 1244.962 | 1335.618 |
| 13192 | CTDSP2    | 3694.615 | -0.25039 | 0.115347 | -2.17076 | 0.02995  | 0.060356 | 3642.278 | 4646.979 | 3752.775 | 3459.797 | 3326.317 | 3339.547 |
| 17184 | TFCP2     | 1431.145 | -0.25039 | 0.170325 | -1.47007 | 0.141543 | 0.218979 | 1306.428 | 2042.393 | 1317.715 | 1283.473 | 1244.962 | 1391.897 |
| 15063 | ZNF337    | 2809.88  | -0.2504  | 0.137397 | -1.82247 | 0.068384 | 0.120692 | 2760.304 | 3710.357 | 2691.785 | 2508.911 | 2417.195 | 2770.728 |
| 14389 | RAB31     | 1056.92  | -0.25045 | 0.128737 | -1.94547 | 0.051719 | 0.095555 | 1066.826 | 1298.461 | 1083.254 | 944.1897 | 917.6785 | 1031.109 |
| 12740 | LOC103211 | 3373.898 | -0.25052 | 0.111324 | -2.25037 | 0.024426 | 0.05097  | 3369.067 | 4084.24  | 3550.317 | 3020.068 | 2894.217 | 3325.477 |
| 19382 | LOC119621 | 168.5528 | -0.25057 | 0.223674 | -1.12024 | 0.262613 | 0.360208 |          |          |          |          |          |          |



|       |           |          |          |          |          |          |          |          |          |          |          |          |          |
|-------|-----------|----------|----------|----------|----------|----------|----------|----------|----------|----------|----------|----------|----------|
| 12028 | DOCK7     | 5225.957 | -0.25089 | 0.104473 | -2.40151 | 0.016328 | 0.036088 | 5562.89  | 6097.073 | 5385.657 | 4392.826 | 4663.261 | 5254.033 |
| 25105 | LOC119621 | 6.536917 | -0.25093 | 1.096148 | -0.22892 | 0.818932 | 0.867176 | 10.84173 | 4.926706 | 4.87012  | 11.16063 | 6.417332 | 1.004979 |
| 20037 | NR2F1     | 139.3633 | -0.25096 | 0.245614 | -1.02175 | 0.306898 | 0.407191 | 123.5957 | 165.3184 | 164.1926 | 129.4634 | 139.0422 | 114.5677 |
| 15202 | DPM1      | 1436.38  | -0.25118 | 0.139859 | -1.79592 | 0.072507 | 0.126799 | 1386.657 | 1885.286 | 1409.552 | 1341.508 | 1321.97  | 1273.309 |
| 14024 | RBM19     | 3143.355 | -0.25128 | 0.125115 | -2.00843 | 0.044598 | 0.084534 | 3206.441 | 3986.8   | 3059.827 | 2841.498 | 2663.193 | 3102.372 |
| 15584 | PFN1      | 13911.15 | -0.25133 | 0.145103 | -1.73204 | 0.083266 | 0.142048 | 13044.77 | 19392.61 | 12921.82 | 12709.73 | 12552.3  | 12845.65 |
| 17660 | RNASEH2C  | 1895.854 | -0.2514  | 0.180254 | -1.39472 | 0.1631   | 0.245528 | 2302.783 | 1393.71  | 2487.24  | 1712.041 | 1666.367 | 1812.983 |
| 14094 | LOC103246 | 1170.684 | -0.25146 | 0.125973 | -1.99611 | 0.045922 | 0.086621 | 1398.583 | 1146.828 | 1275.971 | 977.6716 | 1082.39  | 1142.662 |
| 22029 | LOC119621 | 92.73388 | -0.25161 | 0.34908  | -0.72078 | 0.471045 | 0.568466 | 82.93921 | 102.9134 | 113.4042 | 109.3742 | 100.5382 | 47.23404 |
| 25287 | LOC103221 | 3.921935 | -0.25163 | 1.254658 | -0.20055 | 0.841047 | 0.884219 | 5.420864 | 4.926706 | 2.782925 | 2.232127 | 2.139111 | 6.029877 |
| 15910 | TSPAN31   | 1723.869 | -0.25168 | 0.14958  | -1.68257 | 0.092458 | 0.154494 | 2125.521 | 1434.766 | 2062.148 | 1549.096 | 1580.803 | 1590.883 |
| 19061 | LOC103246 | 222.0873 | -0.25169 | 0.214166 | -1.17523 | 0.239903 | 0.334601 | 202.7403 | 279.7274 | 241.4188 | 234.3733 | 173.268  | 200.9959 |
| 23294 | LOC119621 | 32.32251 | -0.25183 | 0.489085 | -0.5149  | 0.606621 | 0.692327 | 44.99317 | 24.63353 | 36.17803 | 35.71403 | 19.252   | 33.16432 |
| 13068 | CRK       | 7175.575 | -0.25188 | 0.114832 | -2.1935  | 0.028271 | 0.057514 | 8520.514 | 6903.41  | 7984.909 | 6316.919 | 6036.57  | 7291.126 |
| 21995 | NPFF      | 60.00352 | -0.25193 | 0.345818 | -0.7285  | 0.466307 | 0.563617 | 73.72375 | 52.00412 | 69.57314 | 53.57105 | 59.8951  | 51.25395 |
| 17235 | LOC103231 | 519.4883 | -0.25205 | 0.172408 | -1.46193 | 0.143762 | 0.221752 | 608.2209 | 481.175  | 609.4607 | 479.9073 | 391.4573 | 546.7088 |
| 13318 | NOL7      | 1354.847 | -0.25208 | 0.117589 | -2.14376 | 0.032052 | 0.063992 | 1405.088 | 1647.162 | 1366.416 | 1258.92  | 1204.319 | 1247.18  |
| 12975 | BET1      | 1158.942 | -0.25211 | 0.114418 | -2.20796 | 0.027247 | 0.055827 | 1261.435 | 1164.345 | 1353.198 | 1091.51  | 1046.025 | 1037.139 |
| 18427 | CUNH14orf | 199.7258 | -0.25216 | 0.200051 | -1.26047 | 0.2075   | 0.299364 | 199.4878 | 219.5121 | 230.9828 | 203.1236 | 175.4071 | 169.8415 |
| 20075 | CPLANE2   | 207.9587 | -0.25228 | 0.248151 | -1.01662 | 0.309334 | 0.409647 | 277.5482 | 157.6546 | 244.2017 | 167.4095 | 198.9373 | 202.0009 |
| 19302 | BCAS4     | 325.4255 | -0.25228 | 0.222186 | -1.13546 | 0.256182 | 0.352844 | 400.0597 | 244.6931 | 418.1346 | 303.5693 | 269.5279 | 316.5685 |
| 16951 | ZNF93     | 597.4588 | -0.25229 | 0.168279 | -1.49922 | 0.133818 | 0.209866 | 565.9382 | 794.2945 | 585.8058 | 549.1032 | 586.1163 | 503.4947 |
| 21949 | NKPD1     | 59.43993 | -0.25229 | 0.342651 | -0.73629 | 0.461554 | 0.559042 | 67.21871 | 56.93083 | 69.57314 | 64.73168 | 44.92132 | 53.26391 |
| 12511 | NIBAN1    | 6636.788 | -0.25232 | 0.109748 | -2.29911 | 0.021499 | 0.045683 | 6785.837 | 8221.578 | 6643.539 | 5857.101 | 5886.833 | 6425.839 |
| 12449 | AP2B1     | 9782.983 | -0.25236 | 0.109188 | -2.31122 | 0.020821 | 0.044463 | 10273.62 | 11504.95 | 10140.28 | 8294.584 | 8370.34  | 10114.11 |
| 11132 | PRRC2A    | 13224.17 | -0.25244 | 0.09725  | -2.59579 | 0.009437 | 0.022538 | 13803.15 | 15346.14 | 13993.25 | 11852.59 | 11206.8  | 13143.12 |
| 11817 | DPP8      | 4188.516 | -0.25254 | 0.10332  | -2.44428 | 0.014514 | 0.032653 | 4474.923 | 4990.206 | 4200.13  | 3580.332 | 3918.851 | 3966.654 |
| 13740 | SOX12     | 1252.674 | -0.25255 | 0.122481 | -2.06196 | 0.039212 | 0.07587  | 1231.078 | 1506.477 | 1351.11  | 1165.17  | 1065.277 | 1196.931 |
| 20890 | STARD6    | 97.68018 | -0.25255 | 0.283379 | -0.89122 | 0.372809 | 0.474423 | 109.5014 | 101.8186 | 105.7512 | 78.12444 | 115.512  | 75.37346 |
| 13557 | MTERF4    | 977.4737 | -0.25289 | 0.120549 | -2.09782 | 0.035921 | 0.070441 | 1013.702 | 1154.492 | 1021.334 | 837.0476 | 934.7914 | 903.4765 |
| 13562 | GNG5      | 3344.462 | -0.25302 | 0.120665 | -2.09688 | 0.036004 | 0.070577 | 3302.39  | 4227.114 | 3378.472 | 2984.354 | 3260.005 | 2914.44  |
| 22914 | LOC119611 | 41.7436  | -0.25314 | 0.438583 | -0.57718 | 0.563818 | 0.654146 | 40.11439 | 38.86624 | 55.65851 | 44.64254 | 47.06043 | 24.11951 |
| 14453 | MRPL28    | 2224.578 | -0.25342 | 0.131041 | -1.93391 | 0.053124 | 0.097717 | 2677.907 | 2049.51  | 2534.549 | 2111.592 | 1801.131 | 2172.766 |
| 12586 | TMEM69    | 1717.393 | -0.25345 | 0.11084  | -2.2866  | 0.032219 | 0.046932 | 1816.531 | 2059.363 | 1726.805 | 1526.775 | 1617.168 | 1557.718 |
| 17709 | LDOC1     | 1358.189 | -0.25346 | 0.183243 | -1.38317 | 0.166614 | 0.250135 | 1137.839 | 2001.885 | 1291.973 | 1216.509 | 1240.684 | 1260.244 |
| 12694 | TTBK2     | 1950.585 | -0.25356 | 0.112109 | -2.26169 | 0.023716 | 0.049669 | 2121.184 | 2312.815 | 1934.829 | 1720.97  | 1711.289 | 1902.426 |
| 12344 | RSPRY1    | 3300.449 | -0.25384 | 0.108677 | -2.33571 | 0.019507 | 0.042011 | 3385.329 | 4033.33  | 3354.121 | 2868.283 | 3031.12  | 3130.511 |
| 11903 | P DPR     | 1795.957 | -0.25386 | 0.104733 | -2.42385 | 0.015357 | 0.034296 | 1977.531 | 2052.794 | 1834.644 | 1584.81  | 1589.359 | 1736.605 |
| 20451 | LOC103221 | 174.0878 | -0.25392 | 0.266192 | -0.9539  | 0.340135 | 0.442136 | 226.05   | 126.9995 | 214.2853 | 151.7846 | 179.6853 | 145.722  |
| 17613 | ACTR5     | 388.7836 | -0.25392 | 0.181244 | -1.40099 | 0.161217 | 0.24309  | 462.3997 | 341.585  | 467.5315 | 345.9797 | 327.2839 | 387.9221 |
| 15825 | TMEM131   | 2050.18  | -0.25414 | 0.149954 | -1.6948  | 0.090113 | 0.151384 | 1916.817 | 2808.223 | 1966.137 | 1779.005 | 1929.478 | 1901.421 |
| 12701 | ZNF275    | 2073.259 | -0.25421 | 0.112543 | -2.25878 | 0.023897 | 0.05002  | 2165.093 | 2473.207 | 2133.808 | 1810.255 | 1798.992 | 2058.198 |
| 13491 | LOC103221 | 11389.48 | -0.25426 | 0.120593 | -2.10839 | 0.034997 | 0.068953 | 11153.43 | 14422.11 | 11602.02 | 9859.305 | 9829.214 | 11470.84 |
| 14838 | TMUB2     | 1056.647 | -0.25439 | 0.136466 | -1.86416 | 0.062299 | 0.11162  | 1231.078 | 1028.587 | 1195.266 | 944.1897 | 851.366  | 1089.398 |
| 17161 | ZNF79     | 283.6103 | -0.25455 | 0.172818 | -1.47294 | 0.140767 | 0.218081 | 329.5885 | 303.2661 | 294.9901 | 236.6055 | 258.8324 | 278.3793 |
| 21894 | LOC103231 | 62.47709 | -0.25461 | 0.341751 | -0.74502 | 0.45626  | 0.554019 | 67.7608  | 81.01695 | 54.96278 | 62.49956 | 51.33866 | 57.28383 |
| 14871 | CLIP1     | 9647.796 | -0.25462 | 0.136947 | -1.85928 | 0.062988 | 0.112604 | 9340.69  | 13095.73 | 9055.64  | 8544.582 | 8716.876 | 9133.253 |
| 13926 | SPOUT1    | 727.1622 | -0.25464 | 0.125625 | -2.027   | 0.042663 | 0.081448 | 811.5033 | 755.9757 | 809.1356 | 674.1023 | 611.7857 | 700.4707 |
| 12100 | R FWD3    | 2417.189 | -0.25503 | 0.106864 | -2.38648 | 0.017011 | 0.037374 | 2555.937 | 2837.783 | 2501.85  | 2218.734 | 2032.155 | 2356.677 |
| 13355 | FXR1      | 9571.63  | -0.25546 | 0.11961  | -2.13576 | 0.032699 | 0.065091 | 9533.673 | 12372.6  | 9345.76  | 8533.421 | 8620.616 | 9023.711 |
| 14627 | IFNGR2    | 1758.189 | -0.25557 | 0.134384 | -1.90178 | 0.0572   | 0.103962 | 2154.793 | 1655.921 | 1936.22  | 1506.686 | 1484.543 | 1810.973 |
| 12404 | FANCG     | 2471.682 | -0.25559 | 0.110145 | -2.32051 | 0.020314 | 0.043537 | 2840.533 | 2536.159 | 2701.525 | 2160.699 | 2087.772 | 2503.404 |
| 16215 | NIPBL     | 4869.145 | -0.25561 | 0.15725  | -1.62553 | 0.10405  | 0.170625 | 4400.657 | 6939.54  | 4559.128 | 4308.005 | 4359.508 | 4648.03  |
| 11109 | NDUFS1    | 6390.462 | -0.25574 | 0.098251 | -2.60292 | 0.009243 | 0.022118 | 7316.54  | 6547.045 | 7010.885 | 5470.943 | 5657.948 | 6339.41  |
| 13174 | CMSTR1    | 3119.261 | -0.25579 | 0.117616 | -2.17476 | 0.029648 | 0.05983  | 3693.777 | 3074.812 | 3424.39  | 2723.195 | 2607.576 | 3191.815 |
| 12609 | COP56     | 2460.484 | -0.25583 | 0.112171 | -2.28069 | 0.022567 | 0.047576 | 2691.459 | 2745.27  | 2606.905 | 2062.485 | 2109.163 | 2547.623 |
| 12276 | UBE2J2    | 1269.73  | -0.25584 | 0.108876 | -2.34985 | 0.018781 | 0.040673 | 1353.048 | 1450.094 | 1346.24  | 1165.17  | 1088.807 | 1215.02  |
| 15893 | WDR90     | 4408.567 | -0.25587 | 0.151782 | -1.68575 | 0.091844 | 0.153632 | 5325.999 | 3636.457 | 5437.836 | 3939.704 | 3632.21  | 4479.193 |
| 13302 | TRAM1     | 11651.5  | -0.25588 | 0.119214 | -2.14637 | 0.031844 | 0.063642 | 11655.4  | 15099.26 | 11291.02 | 10528.94 | 10680.58 | 10653.79 |
| 13619 | HDGF      | 15279.84 | -0.25591 | 0.122696 | -2.08574 | 0.037002 | 0.072231 | 15055.91 | 19809.19 | 15032.67 | 13836.96 | 13080.66 | 14863.65 |
| 19986 | LOC119611 | 341.3105 | -0.25623 | 0.248396 | -1.03155 | 0.302284 | 0.402093 | 424.9957 | 272.0637 | 423.0047 | 256.6946 | 245.9977 | 425.1063 |
| 11217 | RBM15B    | 2699.841 | -0.25635 | 0.099448 | -2.57772 | 0.009945 | 0.023572 | 3003.158 | 2980.11  | 2840.671 | 2417.394 | 2299.544 | 2658.171 |
| 13035 | FECH      | 2206.974 | -0.25668 | 0.116766 | -2.19827 | 0.02793  | 0.056964 | 2611.23  | 2177.057 | 2426.015 | 1993.289 | 1835.357 | 2198.895 |
| 22065 | LOC119611 | 62.92052 | -0.25674 | 0.359355 | -0.71445 | 0.474949 | 0.572242 | 72.63957 | 72.80577 | 59.13717 | 42.41041 | 81.28621 | 49.24399 |
| 18859 | SMIM26    | 860.5988 | -0.25682 | 0.212074 | -1.21101 | 0.225892 | 0.318436 | 1034.301 | 591.2048 | 1186.918 | 812.4942 | 716.6021 | 822.0732 |
| 11950 | GPD1L     | 1616.662 | -0.25684 | 0.106388 | -2.41418 | 0.01577  | 0.035084 | 1836.047 | 1736.938 | 1713.586 | 1410.704 | 1411.813 | 1590.883 |
| 15884 | ANKRD13B  | 601.3901 | -0.25697 | 0.152305 | -1.68721 | 0.091564 | 0.15325  | 585.4533 | 749.9542 | 632.4198 | 535.7105 | 504.8301 | 599.9727 |
| 25626 | LOC103221 | 1.931101 | -0.25699 | 1.761594 | -0.14589 | 0.884012 | 0.917061 | 0.542086 | 2.189647 | 3.478657 | 2.232127 | 2.139111 | 1.004979 |
| 11029 | EPG5      | 3525.961 | -0.25702 | 0.097969 | -2.6235  | 0.008703 | 0.020979 | 3802.194 | 3995.559 | 3726.337 | 3205.334 | 2971.225 | 3455.119 |
| 11493 | DCAF8     | 7640.348 | -0.25741 | 0.102251 | -2.51739 | 0.011823 | 0.027348 | 8019.626 | 9053.097 | 7894.464 | 6848.166 | 6462.253 | 7564.48  |
| 13056 | TULP3     | 1687.408 | -0.25767 | 0.117365 | -2.19547 |          |          |          |          |          |          |          |          |



|       |           |            |          |          |          |          |          |          |          |          |          |          |          |
|-------|-----------|------------|----------|----------|----------|----------|----------|----------|----------|----------|----------|----------|----------|
| 16362 | LOC119621 | 432.5122   | -0.25854 | 0.162128 | -1.59468 | 0.110785 | 0.179973 | 458.6051 | 511.2826 | 439.0065 | 399.5507 | 444.935  | 341.693  |
| 14623 | FAM111A   | 669.4445   | -0.25857 | 0.135858 | -1.90321 | 0.057013 | 0.103651 | 701.4598 | 810.7169 | 674.8594 | 587.0494 | 639.5941 | 602.9877 |
| 10802 | TNPO3     | 4818.783   | -0.2586  | 0.096847 | -2.67016 | 0.007582 | 0.018658 | 5329.793 | 5279.24  | 5148.412 | 4236.577 | 4102.814 | 4815.862 |
| 14329 | WDR83O5   | 3448.288   | -0.25868 | 0.132235 | -1.95623 | 0.050438 | 0.093579 | 4207.132 | 3194.148 | 3873.832 | 3212.031 | 2727.366 | 3475.219 |
| 13885 | CYREN     | 1179.938   | -0.25868 | 0.127239 | -2.03304 | 0.042048 | 0.080508 | 1361.721 | 1204.306 | 1297.539 | 1029.011 | 969.0171 | 1218.035 |
| 20937 | LOC103221 | 126.6566   | -0.25876 | 0.292021 | -0.88609 | 0.375566 | 0.47673  | 157.205  | 95.24966 | 161.4097 | 138.3919 | 94.12087 | 113.5627 |
| 23682 | LOC103231 | 19.83256   | -0.25881 | 0.567313 | -0.45621 | 0.648241 | 0.727694 | 23.8518  | 17.51718 | 23.65487 | 15.62489 | 19.252   | 19.09461 |
| 10069 | STARD4    | 5032.015   | -0.259   | 0.091007 | -2.84597 | 0.004428 | 0.01169  | 5349.308 | 5849.095 | 5249.293 | 4703.092 | 4419.403 | 4621.901 |
| 21074 | LOC103241 | 77.88931   | -0.25904 | 0.298038 | -0.86916 | 0.38476  | 0.485355 | 85.64965 | 81.01695 | 86.96642 | 66.96381 | 83.42532 | 63.31371 |
| 14674 | ELP6      | 642.4247   | -0.25919 | 0.136896 | -1.89338 | 0.058308 | 0.105637 | 744.8267 | 654.7045 | 704.7759 | 531.2462 | 581.8381 | 637.157  |
| 12419 | GGA3      | 1938.722   | -0.2592  | 0.111869 | -2.31697 | 0.020506 | 0.043896 | 1995.42  | 2249.315 | 2097.63  | 1801.326 | 1587.22  | 1901.421 |
| 13710 | LOC119611 | 732.2476   | -0.25921 | 0.125409 | -2.06692 | 0.038742 | 0.075124 | 789.2778 | 826.0444 | 782.6978 | 642.8526 | 631.0376 | 721.5753 |
| 14441 | ARL15     | 541.3818   | -0.25923 | 0.133876 | -1.93637 | 0.052822 | 0.097246 | 599.0054 | 585.7306 | 581.6314 | 520.0856 | 500.5519 | 461.2856 |
| 24154 | LOC103231 | 15.20542   | -0.25933 | 0.678509 | -0.3822  | 0.70231  | 0.772994 | 12.46799 | 22.44388 | 14.61036 | 20.08914 | 8.556443 | 13.06473 |
| 12861 | HDGFL2    | 2669.593   | -0.25937 | 0.116494 | -2.2265  | 0.025981 | 0.053705 | 2594.967 | 3293.777 | 2840.671 | 2457.572 | 2290.988 | 2539.583 |
| 14957 | DCUN1D2   | 689.2282   | -0.25938 | 0.140672 | -1.84389 | 0.065199 | 0.115887 | 846.1968 | 662.3683 | 743.0411 | 636.1562 | 639.5941 | 608.0126 |
| 12294 | ELFN2     | 1858.602   | -0.25941 | 0.11059  | -2.34571 | 0.018991 | 0.041067 | 1870.74  | 2168.846 | 2039.884 | 1729.898 | 1559.412 | 1782.834 |
| 11794 | LOC103231 | 4494.854   | -0.25954 | 0.105912 | -2.4505  | 0.014266 | 0.032156 | 5282.09  | 4293.898 | 5117.104 | 4158.453 | 4100.675 | 4016.903 |
| 15926 | ZNF19     | 353.1656   | -0.25955 | 0.15451  | -1.67985 | 0.092987 | 0.155212 | 382.1709 | 399.0632 | 374.9992 | 319.1942 | 305.8928 | 337.6731 |
| 18875 | SLC9A3R2  | 261.5202   | -0.25964 | 0.215074 | -1.20721 | 0.227351 | 0.320219 | 325.2518 | 214.038  | 316.5578 | 249.9982 | 216.0502 | 247.2249 |
| 10601 | CS        | 10718.52   | -0.25981 | 0.095454 | -2.72183 | 0.006492 | 0.016281 | 11261.3  | 12727.32 | 11059.35 | 9627.164 | 9332.94  | 10303.05 |
| 15912 | ERO1B     | 368.8198   | -0.26034 | 0.154753 | -1.68232 | 0.092507 | 0.154547 | 397.3493 | 425.8864 | 382.6523 | 354.9082 | 314.4493 | 337.6731 |
| 13025 | INO80     | 2862.221   | -0.26044 | 0.118387 | -2.19989 | 0.027814 | 0.056771 | 2990.148 | 3567.483 | 2805.189 | 2591.499 | 2449.282 | 2769.723 |
| 12809 | THAP5     | 962.8858   | -0.2607  | 0.116536 | -2.23703 | 0.025284 | 0.052477 | 1071.163 | 1001.764 | 1072.122 | 881.6902 | 930.5131 | 820.0632 |
| 23018 | LOC119621 | 32.75289   | -0.26072 | 0.466228 | -0.5592  | 0.576023 | 0.665272 | 39.03022 | 26.82318 | 41.04815 | 37.94616 | 23.53022 | 28.13943 |
| 18761 | PXMP2     | 199.8984   | -0.26073 | 0.21315  | -1.22322 | 0.221248 | 0.313516 | 241.2284 | 192.1415 | 222.634  | 187.4987 | 151.8769 | 204.0108 |
| 19768 | SPATA33   | 113.0513   | -0.26094 | 0.246631 | -1.05801 | 0.290052 | 0.390076 | 120.8853 | 122.6202 | 125.2316 | 107.1421 | 106.9555 | 95.47305 |
| 18423 | LOC103231 | 259.4659   | -0.26099 | 0.20691  | -1.26139 | 0.207169 | 0.298952 | 285.6795 | 304.361  | 253.942  | 245.534  | 282.3626 | 184.9162 |
| 11486 | ECPAS     | 12968.53   | -0.26102 | 0.10357  | -2.52024 | 0.011728 | 0.027144 | 14151.16 | 15439.75 | 12829.98 | 11705.27 | 10980.06 | 12704.95 |
| 22838 | TNFSF13B  | 37.83409   | -0.26107 | 0.444465 | -0.58737 | 0.556952 | 0.648331 | 33.60935 | 53.64636 | 37.56949 | 29.01765 | 29.94755 | 43.21412 |
| 20239 | EXOG      | 120.6555   | -0.26113 | 0.263963 | -0.98927 | 0.322532 | 0.423662 | 156.1209 | 104.5557 | 134.2762 | 111.6063 | 104.8164 | 112.5577 |
| 22470 | GLT1D1    | 43.32632   | -0.26116 | 0.404844 | -0.64509 | 0.51887  | 0.613892 | 51.49821 | 44.34036 | 45.22254 | 31.24978 | 53.47777 | 34.1693  |
| 15353 | TUT1      | 603.1692   | -0.26133 | 0.147785 | -1.76828 | 0.077014 | 0.13333  | 676.5238 | 608.7219 | 692.9484 | 546.8711 | 474.8826 | 619.0674 |
| 11929 | KHLH15    | 1213.133   | -0.26138 | 0.108056 | -2.41893 | 0.015566 | 0.034691 | 1339.495 | 1337.327 | 1296.148 | 1064.725 | 1065.277 | 1175.826 |
| 9734  | PPIP5K2   | 3311.049   | -0.26147 | 0.089529 | -2.92053 | 0.003494 | 0.009544 | 3686.187 | 3672.038 | 3475.178 | 2901.765 | 3041.815 | 3089.307 |
| 16380 | CEP63     | 1584.675   | -0.26151 | 0.1643   | -1.59164 | 0.111465 | 0.18091  | 1485.317 | 2251.505 | 1446.426 | 1419.633 | 1461.013 | 1444.155 |
| 10901 | PARP6     | 2729.743   | -0.26156 | 0.098685 | -2.65044 | 0.008039 | 0.019605 | 2999.364 | 3099.446 | 2836.497 | 2428.554 | 2359.439 | 2655.156 |
| 25674 | LOC119621 | 2.286074   | -0.2616  | 1.880761 | -0.13909 | 0.889377 | 0.920897 | 5.96295  | 0.547412 | 0.695731 | 2.232127 | 4.278221 | 0        |
| 15098 | TRAPPC6B  | 1030.921   | -0.26164 | 0.144026 | -1.8166  | 0.069278 | 0.121986 | 1024.543 | 1308.862 | 1033.857 | 973.2074 | 1013.938 | 831.118  |
| 16326 | MVB12A    | 844.1091   | -0.26166 | 0.163501 | -1.60038 | 0.109513 | 0.17833  | 1008.823 | 744.4801 | 1013.681 | 712.0485 | 695.211  | 890.4118 |
| 9788  | SLC39A9   | 6172.644   | -0.26168 | 0.090006 | -2.90731 | 0.003646 | 0.009901 | 6591.77  | 6945.561 | 6663.019 | 5464.247 | 5358.472 | 6012.792 |
| 16401 | CUNH11or  | 392.2201   | -0.26173 | 0.164803 | -1.58814 | 0.112255 | 0.181958 | 431.5008 | 383.7357 | 471.7059 | 325.8905 | 346.5359 | 393.952  |
| 12778 | SPOPL     | 1404.027   | -0.26184 | 0.116714 | -2.24347 | 0.024866 | 0.051735 | 1426.771 | 1713.399 | 1451.991 | 1272.312 | 1298.44  | 1261.249 |
| 11423 | NUP93     | 3878.866   | -0.26187 | 0.103451 | -2.53132 | 0.011364 | 0.026447 | 4508.532 | 4037.71  | 4150.733 | 3482.118 | 3245.031 | 3849.071 |
| 11857 | ABI2      | 3355.389   | -0.26195 | 0.107605 | -2.43439 | 0.014917 | 0.033443 | 3484.531 | 4072.196 | 3424.39  | 2868.283 | 3076.041 | 3206.889 |
| 13608 | PPFIBP1   | 1473.614   | -0.26196 | 0.125455 | -2.08808 | 0.03679  | 0.071875 | 1580.724 | 1805.364 | 1438.772 | 1236.598 | 1339.083 | 1441.141 |
| 14449 | CEP152    | 1665.37    | -0.26214 | 0.135505 | -1.93451 | 0.05305  | 0.097608 | 1672.879 | 2147.497 | 1628.707 | 1611.596 | 1381.865 | 1549.678 |
| 10393 | PPP4R1    | 6749.979   | -0.26217 | 0.094729 | -2.76758 | 0.005647 | 0.014446 | 7588.125 | 7375.827 | 7128.464 | 6098.171 | 5664.365 | 6644.924 |
| 13851 | PHLPP1    | 833.7069   | -0.2622  | 0.128535 | -2.03988 | 0.041362 | 0.079392 | 907.4526 | 943.738  | 882.8831 | 712.0485 | 705.9065 | 850.2126 |
| 22853 | LOC119611 | 40.94179   | -0.26226 | 0.448234 | -0.5851  | 0.55848  | 0.649682 | 48.78777 | 27.37059 | 58.44144 | 33.4819  | 36.36488 | 41.20416 |
| 15228 | LOC103231 | 2939.045   | -0.26234 | 0.146512 | -1.79056 | 0.073364 | 0.128078 | 3484.531 | 2442.552 | 3689.463 | 2787.927 | 2594.741 | 2635.056 |
| 13599 | RAD23B    | 9883.909   | -0.26257 | 0.125663 | -2.08944 | 0.036668 | 0.071683 | 9854.046 | 13028.4  | 9461.251 | 8772.259 | 8911.535 | 9275.961 |
| 11953 | ENO1      | 89785.04   | -0.26258 | 0.108791 | -2.41362 | 0.015795 | 0.03513  | 105650.5 | 90805.77 | 97352.99 | 79419.08 | 73405.72 | 92076.22 |
| 14161 | LOC119621 | 7406.684   | -0.26261 | 0.132444 | -1.98277 | 0.047393 | 0.088972 | 9012.186 | 6602.881 | 8627.765 | 6591.471 | 6098.605 | 7507.197 |
| 16219 | UBALD2    | 625.062    | -0.26269 | 0.161723 | -1.62431 | 0.10431  | 0.170977 | 582.2008 | 824.9496 | 639.3771 | 551.3354 | 562.5861 | 589.9229 |
| 13534 | LOC103231 | 834.4395   | -0.26289 | 0.12512  | -2.10109 | 0.035633 | 0.069995 | 952.4458 | 838.0875 | 944.1075 | 738.834  | 725.1585 | 808.0035 |
| 12481 | CHD2      | 10384.82   | -0.26291 | 0.114122 | -2.30379 | 0.021234 | 0.04523  | 10519.19 | 13257.22 | 10209.86 | 9225.381 | 9448.452 | 9648.808 |
| 15173 | LIN52     | 570.5076   | -0.26307 | 0.146023 | -1.80157 | 0.071613 | 0.125476 | 661.8875 | 599.4159 | 600.4162 | 537.9426 | 571.1425 | 452.2408 |
| 12579 | ZCHC14    | 2058.225   | -0.2632  | 0.115019 | -2.28831 | 0.02212  | 0.046748 | 2059.386 | 2434.34  | 2248.604 | 1848.201 | 1717.706 | 2041.113 |
| 12464 | PFKM      | 3711.549   | -0.26328 | 0.114098 | -2.30753 | 0.021025 | 0.044845 | 4325.307 | 3853.232 | 3978.888 | 3124.978 | 3133.797 | 3853.091 |
| 12300 | LOC103231 | 1528.611   | -0.26333 | 0.112314 | -2.34462 | 0.019046 | 0.041167 | 1587.771 | 1847.515 | 1566.787 | 1388.383 | 1405.396 | 1375.817 |
| 10290 | IL6ST     | 39804.28   | -0.26333 | 0.09437  | -2.79046 | 0.005263 | 0.013598 | 41676.14 | 47405.86 | 41204.69 | 34928.32 | 35154.14 | 38456.54 |
| 12284 | TMEM38B   | 941.6072   | -0.2634  | 0.11218  | -2.34799 | 0.018875 | 0.040849 | 1053.816 | 1026.397 | 999.766  | 892.8508 | 840.6705 | 836.1429 |
| 10753 | GADD45G1  | 1873.797   | -0.26348 | 0.098366 | -2.67861 | 0.007393 | 0.018278 | 1968.858 | 2154.613 | 2010.664 | 1718.738 | 1666.367 | 1723.54  |
| 22463 | LOC119621 | 38.52441   | -0.26348 | 0.407367 | -0.6468  | 0.517762 | 0.612772 | 39.03022 | 44.34036 | 42.43961 | 37.94616 | 34.22577 | 33.16432 |
| 12720 | SENPG     | 2798.226   | -0.26359 | 0.116947 | -2.25391 | 0.024202 | 0.050582 | 2859.506 | 3514.931 | 2784.317 | 2453.108 | 2643.941 | 2533.553 |
| 22845 | LOC103211 | 39.39247   | -0.26367 | 0.449815 | -0.58616 | 0.557765 | 0.649078 | 49.32986 | 50.9093  | 29.91645 | 29.01765 | 29.94755 | 47.23404 |
| 15283 | PSRC1     | 492.6731   | -0.2638  | 0.147965 | -1.78286 | 0.074609 | 0.129783 | 498.7195 | 595.5841 | 516.2327 | 448.6575 | 472.7435 | 424.1013 |
| 10248 | ZNF451    | 2255.559   | -0.26385 | 0.094128 | -2.8031  | 0.005061 | 0.01313  | 2424.752 | 2566.267 | 2394.707 | 1993.289 | 2059.964 | 2094.377 |
| 10366 | AUP1      | 3559.272   | -0.26389 | 0.095183 | -2.77247 | 0.005563 | 0.014268 | 3754.49  | 4161.972 | 3738.165 | 3243.281 | 3108.128 | 3349.597 |
| 13374 | SRSF9     | 3264.056</ |          |          |          |          |          |          |          |          |          |          |          |



|       |           |          |          |          |          |          |          |          |          |          |          |          |          |
|-------|-----------|----------|----------|----------|----------|----------|----------|----------|----------|----------|----------|----------|----------|
| 15358 | RAD51D    | 535.2683 | -0.26445 | 0.149608 | -1.76758 | 0.077131 | 0.133515 | 612.0155 | 544.6748 | 601.1119 | 470.9788 | 432.1004 | 550.7287 |
| 23453 | LOC119615 | 24.5677  | -0.26452 | 0.537682 | -0.49195 | 0.622752 | 0.705916 | 28.73058 | 18.612   | 32.69937 | 29.01765 | 19.252   | 19.09461 |
| 18114 | LOC10324  | 270.8708 | -0.26465 | 0.200658 | -1.31888 | 0.187208 | 0.274756 | 266.1644 | 354.7229 | 267.8566 | 252.2303 | 213.9111 | 270.3395 |
| 12406 | RPP30     | 917.0129 | -0.2647  | 0.11415  | -2.31891 | 0.0204   | 0.043707 | 987.1393 | 1032.966 | 979.5898 | 834.8155 | 870.618  | 796.9487 |
| 10788 | KHDC4     | 2199.484 | -0.26485 | 0.099088 | -2.67288 | 0.00752  | 0.018532 | 2355.365 | 2555.866 | 2293.826 | 1928.558 | 2000.068 | 2063.223 |
| 12054 | SCO1      | 1755.742 | -0.265   | 0.110579 | -2.39645 | 0.016555 | 0.036512 | 1922.78  | 2065.385 | 1764.375 | 1609.364 | 1495.238 | 1677.311 |
| 24217 | LOC103215 | 17.53673 | -0.2651  | 0.714317 | -0.37112 | 0.710545 | 0.780002 | 26.56223 | 6.02153  | 25.04633 | 13.39276 | 17.11289 | 17.08465 |
| 24648 | TTC36     | 8.950992 | -0.26528 | 0.862778 | -0.30748 | 0.75848  | 0.818086 | 7.589209 | 8.758589 | 12.52316 | 13.39276 | 6.417332 | 5.024897 |
| 12271 | ARL6IP1   | 9657.732 | -0.26539 | 0.112911 | -2.35043 | 0.018752 | 0.040626 | 11562.16 | 8986.312 | 11086.48 | 8569.135 | 8462.322 | 9279.98  |
| 19054 | LOC119618 | 194.6447 | -0.26555 | 0.22571  | -1.17651 | 0.23939  | 0.334008 | 178.8885 | 248.525  | 207.3279 | 189.7308 | 194.6591 | 148.737  |
| 13876 | EEFSEC    | 752.3287 | -0.2657  | 0.130568 | -2.03498 | 0.041853 | 0.080186 | 810.4191 | 862.1736 | 797.3082 | 636.1562 | 648.1505 | 759.7645 |
| 18936 | SPATA24   | 167.461  | -0.26594 | 0.221987 | -1.19798 | 0.230925 | 0.324205 | 195.1511 | 170.2451 | 185.0645 | 122.767  | 164.7115 | 166.8266 |
| 15100 | MYOF      | 19867.31 | -0.26594 | 0.146526 | -1.81496 | 0.069529 | 0.122413 | 18055.27 | 27639.92 | 19387.25 | 17803.44 | 16911.81 | 19406.15 |
| 18261 | MAST1     | 205.0637 | -0.266   | 0.205969 | -1.29144 | 0.196552 | 0.286148 | 214.1241 | 215.6803 | 242.1145 | 216.5163 | 154.016  | 187.9312 |
| 14034 | CUNH1orf  | 715.2217 | -0.26601 | 0.13254  | -2.00703 | 0.044747 | 0.08477  | 736.6954 | 866.0055 | 738.171  | 676.3345 | 646.0114 | 628.1122 |
| 22536 | LOC103216 | 38.8618  | -0.26602 | 0.41885  | -0.63513 | 0.525343 | 0.61973  | 47.7036  | 42.15071 | 37.56949 | 26.78552 | 42.78221 | 36.17926 |
| 25920 | LOC119624 | 1.186139 | -0.26609 | 2.637666 | -0.10088 | 0.919644 | 0.94322  | 2.710432 | 0        | 1.391463 | 0        | 0        | 3.014938 |
| 24052 | LOC119618 | 16.37418 | -0.26627 | 0.668805 | -0.39812 | 0.69054  | 0.763263 | 17.88885 | 11.49565 | 23.65487 | 22.32127 | 12.83466 | 10.04979 |
| 15134 | DSN1      | 1915.535 | -0.2663  | 0.147211 | -1.80896 | 0.070457 | 0.123767 | 2425.294 | 1616.507 | 2234.689 | 1714.274 | 1732.68  | 1769.769 |
| 11445 | FXR2      | 4093.84  | -0.26638 | 0.105411 | -2.52711 | 0.011501 | 0.026714 | 4292.24  | 4937.655 | 4186.911 | 3683.01  | 3499.585 | 3963.639 |
| 13301 | MTMR12    | 1458.274 | -0.26644 | 0.124093 | -2.14712 | 0.031784 | 0.063527 | 1567.172 | 1737.485 | 1478.429 | 1323.651 | 1178.65  | 1464.255 |
| 11046 | LOC10324  | 2912.6   | -0.2665  | 0.101865 | -2.61619 | 0.008892 | 0.021398 | 3154.943 | 3383.552 | 3009.734 | 2602.66  | 2485.647 | 2839.067 |
| 15521 | LOC11962  | 471.4464 | -0.26672 | 0.153394 | -1.73878 | 0.082074 | 0.140579 | 509.5612 | 550.6963 | 480.7504 | 415.1756 | 485.5781 | 386.9171 |
| 10583 | CDC16     | 2721.116 | -0.26689 | 0.097892 | -2.72636 | 0.006404 | 0.016087 | 3010.206 | 3092.329 | 2819.104 | 2395.072 | 2382.969 | 2627.016 |
| 13505 | PITPNC1   | 2974.334 | -0.2673  | 0.126904 | -2.10633 | 0.035175 | 0.069244 | 3045.441 | 3850.495 | 2853.194 | 2587.035 | 2688.862 | 2820.977 |
| 11831 | PYGO2     | 2839.548 | -0.26759 | 0.109583 | -2.44189 | 0.014611 | 0.032831 | 3313.774 | 2781.399 | 3216.366 | 2555.785 | 2419.334 | 2750.629 |
| 17084 | MPHOSPH   | 1626.664 | -0.26766 | 0.180371 | -1.48393 | 0.137828 | 0.214478 | 1424.061 | 2417.371 | 1488.865 | 1466.507 | 1523.047 | 1440.136 |
| 14072 | LOC10322  | 3389.05  | -0.26769 | 0.133884 | -1.99942 | 0.045563 | 0.086078 | 3901.396 | 2959.856 | 4248.136 | 3118.281 | 2969.086 | 3137.546 |
| 23495 | LOC11962  | 22.13618 | -0.26774 | 0.551472 | -0.4855  | 0.627318 | 0.709821 | 20.0572  | 30.10765 | 22.2634  | 15.62489 | 25.66933 | 19.09461 |
| 20165 | IL12A     | 102.0042 | -0.26777 | 0.267424 | -1.00127 | 0.316694 | 0.417521 | 110.5856 | 125.9047 | 97.40239 | 89.28508 | 98.39909 | 90.44815 |
| 12939 | LOC10323  | 987.7592 | -0.26777 | 0.120872 | -2.21529 | 0.02674  | 0.054942 | 1168.196 | 1022.565 | 1050.554 | 874.9938 | 853.5052 | 956.7405 |
| 24993 | LOC10324  | 5.812826 | -0.26789 | 1.085401 | -0.24681 | 0.805054 | 0.856335 | 8.673382 | 2.737059 | 7.653045 | 2.232127 | 8.556443 | 5.024897 |
| 24503 | LOC11962  | 13.05421 | -0.26803 | 0.811494 | -0.33029 | 0.741184 | 0.804063 | 14.63633 | 14.78012 | 12.52316 | 6.696381 | 25.66933 | 4.019918 |
| 11452 | MYO9B     | 4147.907 | -0.2681  | 0.106121 | -2.52639 | 0.011524 | 0.026754 | 4600.145 | 4604.281 | 4401.892 | 3600.421 | 3439.629 | 4241.013 |
| 13944 | FBXL17    | 815.496  | -0.26816 | 0.132452 | -2.02458 | 0.042911 | 0.081811 | 906.3684 | 961.2551 | 807.7441 | 667.406  | 774.3581 | 775.8442 |
| 10909 | FLNC      | 25897.54 | -0.26826 | 0.101261 | -2.64916 | 0.008069 | 0.019664 | 27974.37 | 28587.49 | 28344.1  | 22778.86 | 21207.14 | 26493.27 |
| 15805 | RASA4B    | 397.8287 | -0.26838 | 0.157871 | -1.70001 | 0.089129 | 0.149921 | 429.8745 | 393.5891 | 481.4461 | 374.9973 | 342.2577 | 364.8075 |
| 13178 | N4BP1     | 2062.302 | -0.2684  | 0.123456 | -2.17406 | 0.029701 | 0.059913 | 2070.77  | 2631.956 | 2057.973 | 1828.112 | 1901.669 | 1883.332 |
| 11315 | TMEM185I  | 2079.408 | -0.26855 | 0.105118 | -2.5547  | 0.010628 | 0.024971 | 2437.762 | 2163.919 | 2220.775 | 1805.791 | 1833.218 | 2014.984 |
| 16882 | CHAC2     | 486.9309 | -0.26859 | 0.177952 | -1.50935 | 0.13121  | 0.206612 | 568.1065 | 441.7613 | 583.7186 | 410.7114 | 528.3603 | 388.9271 |
| 11970 | CUX1      | 5246.544 | -0.26859 | 0.111362 | -2.41189 | 0.01587  | 0.035248 | 5339.009 | 6470.408 | 5396.788 | 4595.949 | 4513.524 | 5163.585 |
| 11914 | PPP4R3B   | 5413.342 | -0.26878 | 0.110992 | -2.42164 | 0.015451 | 0.034477 | 5489.709 | 6803.234 | 5457.317 | 4839.251 | 4819.416 | 5071.126 |
| 11969 | ZSCAN29   | 2256.682 | -0.26893 | 0.111504 | -2.41188 | 0.01587  | 0.035248 | 2407.948 | 2736.512 | 2258.344 | 1986.593 | 1982.956 | 2167.741 |
| 19481 | LOC10323  | 156.2992 | -0.26894 | 0.243684 | -1.10363 | 0.269755 | 0.368124 | 184.3094 | 183.383  | 142.6249 | 129.4634 | 175.4071 | 122.6075 |
| 12269 | EEF1AKNN  | 1232.793 | -0.26895 | 0.1144   | -2.35099 | 0.018724 | 0.040571 | 1455.502 | 1306.125 | 1284.32  | 1084.814 | 1078.112 | 1187.886 |
| 11661 | LOC11962C | 1250.408 | -0.26916 | 0.108579 | -2.47893 | 0.013178 | 0.030042 | 1418.098 | 1352.655 | 1333.021 | 1140.617 | 1063.138 | 1194.921 |
| 11920 | NUP153    | 4489.068 | -0.26921 | 0.111242 | -2.42004 | 0.015519 | 0.034611 | 4679.29  | 5553.493 | 4491.642 | 3939.704 | 3916.712 | 4353.571 |
| 24275 | TGM1      | 11.61201 | -0.26921 | 0.737215 | -0.36518 | 0.71498  | 0.782985 | 12.46799 | 12.04306 | 13.2189  | 8.928508 | 14.97377 | 8.039836 |
| 11767 | TBC1D31   | 3095.249 | -0.26924 | 0.109664 | -2.45511 | 0.014084 | 0.03182  | 3194.515 | 3795.206 | 3157.229 | 2973.193 | 2718.81  | 2732.539 |
| 26003 | LOC11962  | 0.75902  | -0.26942 | 3.118944 | -0.08638 | 0.931162 | 0.952004 | 1.626259 | 0        | 0.695731 | 2.232127 | 0        | 0        |
| 10271 | RRN3      | 3790.979 | -0.26955 | 0.096422 | -2.79552 | 0.005182 | 0.013412 | 4128.53  | 4421.445 | 3886.355 | 3383.905 | 3317.761 | 3607.876 |
| 18277 | SBK1      | 181.3784 | -0.26973 | 0.209359 | -1.28835 | 0.197624 | 0.287456 | 187.5619 | 204.1846 | 205.9365 | 151.7846 | 151.8769 | 186.9262 |
| 14999 | LOC119615 | 704.3834 | -0.2698  | 0.147071 | -1.83445 | 0.066587 | 0.118023 | 685.1972 | 902.1347 | 723.5606 | 618.2992 | 643.8723 | 653.2367 |
| 12407 | LOC103216 | 3775.413 | -0.26981 | 0.116354 | -2.31891 | 0.0204   | 0.043707 | 3890.012 | 4776.715 | 3717.293 | 3301.316 | 3422.577 | 3544.563 |
| 14401 | CDP41     | 837.6721 | -0.27    | 0.138963 | -1.94296 | 0.052021 | 0.096028 | 864.0857 | 1057.052 | 827.9203 | 761.1553 | 720.8803 | 794.9388 |
| 12417 | CEK8      | 1520.342 | -0.27001 | 0.11653  | -2.31709 | 0.020499 | 0.043888 | 1557.414 | 1859.011 | 1568.874 | 1339.276 | 1441.761 | 1355.717 |
| 24603 | LOC119615 | 9.483178 | -0.27005 | 0.855738 | -0.31557 | 0.752326 | 0.8129   | 9.757555 | 6.568942 | 15.30609 | 8.928508 | 4.278221 | 12.05975 |
| 15829 | RPL39L    | 1260.957 | -0.27008 | 0.159446 | -1.69385 | 0.090293 | 0.151649 | 1439.781 | 1058.694 | 1635.664 | 1158.474 | 1212.876 | 1060.253 |
| 14272 | SLC25A14  | 575.054  | -0.2702  | 0.137441 | -1.96594 | 0.049305 | 0.09183  | 620.1468 | 600.5108 | 662.3363 | 520.0856 | 566.8643 | 480.3802 |
| 12292 | PHF2      | 2031.922 | -0.27033 | 0.115225 | -2.3461  | 0.018971 | 0.041031 | 2154.793 | 2319.931 | 2197.12  | 1874.987 | 1608.611 | 2036.088 |
| 8681  | RTF2      | 3665.78  | -0.27036 | 0.084266 | -3.20838 | 0.001335 | 0.004088 | 3961.567 | 4026.761 | 4037.329 | 3270.066 | 3358.404 | 3340.552 |
| 11752 | NKIRAS2   | 2018.747 | -0.27052 | 0.11004  | -2.45842 | 0.013955 | 0.031569 | 2173.224 | 2404.78  | 2048.929 | 1783.469 | 1743.375 | 1958.705 |
| 19172 | MEIS2     | 155.4187 | -0.27068 | 0.233878 | -1.15737 | 0.247121 | 0.342664 | 151.2421 | 185.5726 | 170.4542 | 145.0883 | 162.5724 | 117.5826 |
| 11331 | MTHFD1    | 6319.792 | -0.27071 | 0.106124 | -2.55086 | 0.010746 | 0.025212 | 6374.936 | 7742.593 | 6619.884 | 5658.442 | 5439.758 | 6083.141 |
| 9913  | LOC11962  | 2052.947 | -0.27072 | 0.093959 | -2.8813  | 0.00396  | 0.010621 | 2210.628 | 2317.742 | 2206.86  | 1895.076 | 1816.105 | 1871.272 |
| 12006 | EML2      | 1727.932 | -0.27076 | 0.112593 | -2.40478 | 0.016182 | 0.035832 | 2024.693 | 1806.459 | 1844.384 | 1468.74  | 1503.795 | 1719.52  |
| 11854 | HNRNP1    | 34408.2  | -0.2708  | 0.11121  | -2.43501 | 0.014892 | 0.033397 | 35090.33 | 43714.67 | 34081.79 | 30370.32 | 30527.25 | 32664.85 |
| 22964 | LOC11962  | 31.27782 | -0.2708  | 0.475748 | -0.56921 | 0.569216 | 0.65897  | 30.35684 | 32.84471 | 40.35242 | 17.85702 | 32.08666 | 34.1693  |
| 14291 | GEMIN6    | 521.0591 | -0.27086 | 0.137944 | -1.96351 | 0.049587 | 0.092245 | 545.881  | 573.1402 | 587.1973 | 488.8358 | 494.1346 | 437.1661 |
| 10913 | CDKN1B    | 2658.414 | -0.27108 | 0.102333 | -2.64896 | 0.008074 | 0.019669 | 2755.425 | 3092.877 | 2867.805 | 2468.732 | 2530.568 | 2235.074 |
| 13630 | SRSF8     | 1514.079 | -0.27129 | 0.130236 | -2.0831  | 0.037242 |          |          |          |          |          |          |          |



|       |           |          |          |            |          |          |          |          |          |          |          |          |          |
|-------|-----------|----------|----------|------------|----------|----------|----------|----------|----------|----------|----------|----------|----------|
| 23013 | LOC119621 | 31.16827 | -0.27164 | 0.484937   | -0.56015 | 0.575375 | 0.664654 | 40.65648 | 35.58177 | 25.04633 | 37.94616 | 25.66933 | 22.10955 |
| 20154 | LTB4R2    | 102.7615 | -0.27174 | 0.270937   | -1.00298 | 0.315869 | 0.416661 | 105.1648 | 124.2625 | 106.4469 | 87.05295 | 111.2338 | 82.40832 |
| 14889 | LOC119621 | 468.6239 | -0.27193 | 0.146468   | -1.8566  | 0.063368 | 0.11314  | 564.3119 | 480.6276 | 493.9693 | 417.4077 | 419.2657 | 436.1611 |
| 11162 | MEA1      | 6024.427 | -0.272   | 0.105063   | -2.58889 | 0.009629 | 0.022931 | 6122.323 | 7459.033 | 6188.531 | 5584.782 | 5433.341 | 5358.551 |
| 14064 | TLL2      | 896.8951 | -0.27201 | 0.135931   | -2.00106 | 0.045386 | 0.085793 | 921.5468 | 1128.763 | 895.4063 | 787.9408 | 791.4709 | 856.2425 |
| 12993 | RAVER1    | 1329.51  | -0.27215 | 0.123462   | -2.20433 | 0.027501 | 0.05627  | 1338.953 | 1606.654 | 1422.771 | 1196.42  | 1103.781 | 1308.483 |
| 11009 | BBS2      | 2590.18  | -0.27217 | 0.103601   | -2.62715 | 0.00861  | 0.020793 | 2751.088 | 3074.812 | 2678.566 | 2372.751 | 2209.701 | 2454.16  |
| 20851 | LOC119611 | 72.96694 | -0.2724  | 0.303267   | -0.89821 | 0.369075 | 0.47057  | 74.80792 | 87.03848 | 77.22618 | 66.96381 | 68.45154 | 63.31371 |
| 22649 | TRNAA-AG  | 48.62627 | -0.27243 | 0.442689   | -0.6154  | 0.538289 | 0.631778 | 67.21871 | 31.74989 | 61.92009 | 44.64254 | 29.94755 | 56.27885 |
| 10677 | STK25     | 3800.941 | -0.27269 | 0.101083   | -2.69773 | 0.006981 | 0.017383 | 4341.57  | 3936.986 | 4206.392 | 3379.44  | 3193.692 | 3747.568 |
| 11551 | FAM53C    | 2302.117 | -0.27287 | 0.108968   | -2.50415 | 0.012274 | 0.02825  | 2609.604 | 2437.625 | 2518.548 | 2026.771 | 1901.669 | 2318.488 |
| 13017 | UBB       | 32325.87 | -0.27296 | 0.124029   | -2.20082 | 0.027749 | 0.056672 | 39484.49 | 29005.16 | 37639.76 | 29075.69 | 27181.68 | 31568.42 |
| 11329 | KCTD18    | 1258.353 | -0.27311 | 0.107046   | -2.55134 | 0.010731 | 0.025182 | 1420.266 | 1411.228 | 1301.713 | 1109.367 | 1133.729 | 1173.816 |
| 18921 | LOC119621 | 198.6307 | -0.27313 | 0.227651   | -1.19979 | 0.23022  | 0.323477 | 196.7774 | 270.9688 | 182.9774 | 178.5702 | 194.6591 | 167.8316 |
| 20792 | LOC119621 | 127.0546 | -0.27315 | 0.301664   | -0.90548 | 0.36521  | 0.466919 | 172.3835 | 119.3358 | 122.4487 | 111.6063 | 156.1551 | 80.39836 |
| 17443 | ZC3H13    | 2104.246 | -0.27339 | 0.19262    | -1.4193  | 0.155811 | 0.237473 | 1805.69  | 3261.48  | 1841.601 | 1966.504 | 1824.661 | 1925.541 |
| 16099 | SEMA3A    | 417.8323 | -0.27343 | 0.166037   | -1.6468  | 0.099599 | 0.164486 | 406.5648 | 523.3257 | 444.5723 | 343.7476 | 380.7617 | 408.0217 |
| 10497 | FOSL2     | 20505.94 | -0.27345 | 0.099616   | -2.74502 | 0.006051 | 0.015324 | 21322.97 | 24586.45 | 21427.83 | 18133.8  | 17485.09 | 20079.49 |
| 21058 | COL6A3    | 100.8487 | -0.27347 | 0.313612   | -0.87201 | 0.383204 | 0.483794 | 113.2961 | 103.4608 | 111.317  | 91.51721 | 126.2075 | 59.29379 |
| 10985 | P3H4      | 2573.718 | -0.2735  | 0.103871   | -2.6331  | 0.008461 | 0.020477 | 2926.182 | 2770.451 | 2761.358 | 2308.019 | 2132.693 | 2543.603 |
| 14920 | PPIE      | 1470.028 | -0.27352 | 0.147795   | -1.85067 | 0.064217 | 0.114417 | 1836.047 | 1280.396 | 1714.282 | 1283.473 | 1257.797 | 1448.175 |
| 11367 | BAHCC1    | 1468.599 | -0.27355 | 0.107475   | -2.54523 | 0.010921 | 0.025544 | 1523.805 | 1608.296 | 1693.41  | 1357.133 | 1247.102 | 1381.847 |
| 24878 | INSM2     | 6.329136 | -0.27361 | 0.1013877  | -0.26986 | 0.787268 | 0.841286 | 9.215468 | 4.926706 | 6.957314 | 6.696381 | 2.139111 | 8.039836 |
| 15324 | ZNFA410   | 3208.113 | -0.2737  | 0.154189   | -1.7751  | 0.075881 | 0.131643 | 4069.984 | 2576.667 | 3887.747 | 2910.694 | 2943.416 | 2860.172 |
| 16406 | FIZ1      | 410.9507 | -0.274   | 0.172631   | -1.58723 | 0.112461 | 0.182215 | 388.1338 | 511.83   | 446.6595 | 368.301  | 417.1266 | 333.6532 |
| 20753 | LOC103221 | 85.27012 | -0.27402 | 0.30094    | -0.91055 | 0.36253  | 0.464437 | 84.02339 | 107.2927 | 87.66215 | 95.98146 | 66.31243 | 70.34856 |
| 12038 | EDEM1     | 3633.88  | -0.27411 | 0.114232   | -2.39956 | 0.016415 | 0.036251 | 4084.079 | 3822.029 | 4038.721 | 3011.139 | 3052.511 | 3794.802 |
| 13273 | RNF8      | 1400.287 | -0.27414 | 0.127319   | -2.15316 | 0.031306 | 0.062705 | 1391.536 | 1775.804 | 1431.119 | 1232.134 | 1304.858 | 1266.274 |
| 11069 | LOC119611 | 5880.814 | -0.27423 | 0.104995   | -2.6118  | 0.009007 | 0.021634 | 6752.77  | 5725.38  | 6841.127 | 5312.462 | 5016.215 | 5636.93  |
| 13193 | SULF2     | 23108.89 | -0.27438 | 0.126419   | -2.17038 | 0.029978 | 0.060409 | 22238.55 | 30677.51 | 22985.57 | 20651.64 | 20099.08 | 22001.01 |
| 12726 | LOC119621 | 1218.572 | -0.27442 | 0.12185    | -2.25213 | 0.024314 | 0.050792 | 1244.63  | 1494.982 | 1265.535 | 1078.117 | 1067.416 | 1160.751 |
| 14334 | IFTAP     | 490.5392 | -0.27449 | 0.14039    | -1.95517 | 0.050563 | 0.093779 | 536.6655 | 533.1791 | 538.4961 | 435.2648 | 485.5781 | 414.0515 |
| 15659 | ZNFA1     | 726.0948 | -0.27463 | 0.159341   | -1.72355 | 0.084789 | 0.14395  | 716.6382 | 964.5396 | 704.7759 | 685.263  | 598.951  | 686.401  |
| 10734 | SSBP1     | 4348.184 | -0.27472 | 0.102345   | -2.68428 | 0.007269 | 0.018003 | 4609.902 | 5216.287 | 4450.594 | 4069.167 | 4057.893 | 3685.26  |
| 23688 | RPL6      | 31.97189 | -0.27494 | 0.604234   | -0.45502 | 0.649095 | 0.728459 | 16.80468 | 65.14201 | 22.2634  | 29.01765 | 38.50399 | 20.09959 |
| 22450 | LOC103221 | 44.45978 | -0.27496 | 0.423456   | -0.64933 | 0.516122 | 0.611185 | 44.99317 | 64.59459 | 36.87376 | 29.01765 | 47.06043 | 44.2191  |
| 11665 | TXN       | 24469.47 | -0.275   | 0.110964   | -2.47827 | 0.013202 | 0.030088 | 28842.79 | 22818.86 | 28718.4  | 22493.14 | 23068.17 | 20875.43 |
| 10876 | MED27     | 1508.174 | -0.27501 | 0.103583   | -2.65493 | 0.007933 | 0.01939  | 1679.926 | 1655.373 | 1623.837 | 1357.133 | 1285.606 | 1447.17  |
| 13844 | ROCK1     | 4878.984 | -0.27501 | 0.134718   | -2.04136 | 0.041215 | 0.079146 | 4796.38  | 6587.554 | 4644.007 | 4334.791 | 4427.959 | 4483.213 |
| 12344 | LOC103231 | 1194.542 | -0.27502 | 0.117416   | -2.34226 | 0.019167 | 0.041367 | 1290.166 | 1407.943 | 1230.749 | 1022.314 | 1050.303 | 1165.776 |
| 10060 | SMG1      | 10020.15 | -0.27504 | 0.096538   | -2.84908 | 0.004385 | 0.011587 | 10860.7  | 11772.09 | 10291.26 | 8613.778 | 8821.692 | 9761.366 |
| 12210 | LOC103241 | 3232.457 | -0.27514 | 0.116341   | -2.36495 | 0.018032 | 0.039262 | 3794.605 | 3191.958 | 3640.762 | 2801.319 | 2688.862 | 3277.238 |
| 21679 | TRNAS-GCI | 58.49303 | -0.27518 | 0.352778   | -0.78003 | 0.435373 | 0.533898 | 63.96619 | 61.31012 | 68.87741 | 42.41041 | 47.06043 | 67.33362 |
| 11664 | NKTR      | 4080.115 | -0.2752  | 0.111042   | -2.47832 | 0.0132   | 0.030087 | 4389.273 | 5054.801 | 3960.799 | 3582.564 | 3730.609 | 3762.643 |
| 14764 | DISP1     | 832.0538 | -0.27525 | 0.146497   | -1.87886 | 0.060263 | 0.108514 | 862.4594 | 1071.832 | 796.6124 | 749.9947 | 797.8883 | 713.5354 |
| 10010 | DDX39B    | 8512.37  | -0.27529 | 0.096313   | -2.85823 | 0.00426  | 0.011313 | 9838.868 | 8947.446 | 9187.133 | 7682.981 | 7097.569 | 8320.225 |
| 16979 | LOC119611 | 1804.675 | -0.2754  | 0.18407    | -1.49615 | 0.134615 | 0.210785 | 2294.652 | 1314.336 | 2320.96  | 1694.184 | 1548.716 | 1655.201 |
| 14522 | RXRβ      | 1730.891 | -0.27549 | 0.143484   | -1.92002 | 0.054855 | 0.100461 | 2056.676 | 1578.188 | 2057.973 | 1560.257 | 1360.474 | 1771.779 |
| 12731 | SPRED2    | 2064.324 | -0.27561 | 0.122412   | -2.25152 | 0.024353 | 0.050847 | 2091.911 | 2618.271 | 2073.975 | 1772.309 | 1905.948 | 1923.531 |
| 11978 | DHX16     | 2164.665 | -0.27565 | 0.11438    | -2.40999 | 0.015953 | 0.035407 | 2396.564 | 2455.142 | 2267.389 | 1986.593 | 1715.567 | 2166.736 |
| 13702 | GAS8      | 946.7658 | -0.27568 | 0.133325   | -2.06772 | 0.038666 | 0.075017 | 1075.499 | 1127.668 | 910.7124 | 852.6725 | 791.4709 | 922.5712 |
| 25101 | LHB       | 4.979542 | -0.27569 | 1.198345   | -0.23006 | 0.818048 | 0.866377 | 7.047123 | 6.02153  | 2.782925 | 4.464254 | 8.556443 | 1.004979 |
| 25300 | LOC103221 | 3.969374 | -0.2758  | 1.38904    | -0.19856 | 0.842609 | 0.885336 | 3.794605 | 2.189647 | 7.653045 | 0        | 2.139111 | 8.039836 |
| 11706 | CDC37     | 8023.295 | -0.27582 | 0.111646   | -2.47046 | 0.013494 | 0.030645 | 8211.524 | 10049.93 | 8106.662 | 7145.038 | 6860.128 | 7766.481 |
| 12111 | HAUS8     | 968.9191 | -0.27597 | 0.115745   | -2.38427 | 0.017113 | 0.037566 | 1060.863 | 1105.224 | 1019.246 | 910.7078 | 815.0012 | 902.4716 |
| 12073 | BCS1L     | 2028.228 | -0.27597 | 0.115318   | -2.39312 | 0.016706 | 0.036786 | 2251.285 | 2175.962 | 1215.821 | 1819.183 | 1612.889 | 2064.228 |
| 23847 | LOC119621 | 19.00764 | -0.276   | 0.64095    | -0.4306  | 0.666756 | 0.74331  | 18.97302 | 30.10765 | 12.52316 | 17.85702 | 23.53022 | 11.05477 |
| 11125 | SMARCA1   | 9745.249 | -0.27603 | 0.106275   | -2.5973  | 0.009396 | 0.022453 | 10178.21 | 12009.67 | 9841.12  | 8546.814 | 8455.904 | 9439.772 |
| 20662 | LOC103231 | 78.39131 | -0.27603 | 0.297728   | -0.92713 | 0.35386  | 0.455296 | 94.86511 | 79.92212 | 83.48776 | 73.66019 | 62.03421 | 76.37844 |
| 12102 | CNTROB    | 3153.637 | -0.27624 | 0.115772   | -2.38603 | 0.017031 | 0.037413 | 3339.794 | 3940.818 | 3084.873 | 2892.837 | 2703.836 | 2959.665 |
| 23486 | LOC103211 | 21.70052 | -0.27644 | 0.56787    | -0.4868  | 0.626402 | 0.709057 | 19.51511 | 25.72836 | 27.13352 | 17.85702 | 12.83466 | 27.13445 |
| 14139 | PRDM4     | 921.2767 | -0.27653 | 0.139133   | -1.98754 | 0.046863 | 0.088108 | 950.2774 | 1179.672 | 898.8849 | 821.4227 | 817.1403 | 860.2624 |
| 18117 | JRKL      | 403.6648 | -0.27659 | 0.209836   | -1.31814 | 0.187456 | 0.275082 | 359.4033 | 591.7522 | 376.3907 | 343.7476 | 365.7879 | 384.9071 |
| 13313 | NR2F6     | 847.4737 | -0.27663 | 0.128995   | -2.14447 | 0.031995 | 0.063896 | 953.5299 | 881.8804 | 954.5434 | 787.9408 | 673.8199 | 833.128  |
| 13146 | MIGA1     | 924.1902 | -0.27668 | 0.126827   | -2.18153 | 0.029144 | 0.058937 | 994.1864 | 1100.845 | 937.8459 | 850.4404 | 892.0091 | 769.8143 |
| 16389 | SCAF4     | 1352.218 | -0.27671 | 0.174057   | -1.58977 | 0.111887 | 0.181494 | 1220.236 | 1967.398 | 1255.795 | 1265.616 | 1204.319 | 1199.945 |
| 15594 | MRPS18C   | 1106.01  | -0.27686 | 0.160011   | -1.73026 | 0.083585 | 0.142497 | 1278.24  | 928.4104 | 1427.641 | 1042.403 | 1009.66  | 949.7056 |
| 11303 | ANKS1A    | 1629.76  | -0.27687 | 0.108275   | -2.55711 | 0.010555 | 0.024825 | 1797.016 | 1814.123 | 1753.243 | 1397.311 | 1396.839 | 1620.027 |
| 21085 | LOC119621 | 95.04077 | -0.27707 | 0.31943    | -0.86738 | 0.385731 | 0.486349 | 120.3432 | 90.32295 | 101.5768 | 55.80317 | 119.7902 | 82.40832 |
| 12124 | TBC1D12   | 1394.823 | -0.2771  | 0.116436   | -2.37987 | 0.017319 | 0.037976 | 1499.953 | 1690.955 | 1395.637 | 1218.741 | 1264.214 | 1299.438 |
| 14633 | DHTKD1    | 524.3571 | -0.27712 | 0.145778</ |          |          |          |          |          |          |          |          |          |



|       |           |          |          |          |          |          |          |          |          |          |          |          |          |
|-------|-----------|----------|----------|----------|----------|----------|----------|----------|----------|----------|----------|----------|----------|
| 16988 | ZNF573    | 261.1813 | -0.27745 | 0.185671 | -1.49433 | 0.135089 | 0.211392 | 316.5784 | 285.2016 | 258.1163 | 209.8199 | 248.1368 | 249.2349 |
| 10175 | CUNH6orf  | 2499.832 | -0.27761 | 0.098441 | -2.82008 | 0.004801 | 0.012544 | 2802.044 | 2552.581 | 2862.239 | 2234.359 | 2350.883 | 2196.885 |
| 22735 | SHC4      | 36.91159 | -0.27767 | 0.460225 | -0.60333 | 0.54629  | 0.6388   | 41.19856 | 35.58177 | 43.13534 | 31.24978 | 49.19955 | 21.10457 |
| 16247 | SLC25A10  | 1884.127 | -0.27776 | 0.171691 | -1.61778 | 0.10571  | 0.172974 | 2421.5   | 1536.585 | 2240.951 | 1747.755 | 1420.369 | 1937.6   |
| 23248 | PRSS27    | 22.3002  | -0.27792 | 0.531925 | -0.52247 | 0.601341 | 0.687657 | 27.6464  | 23.53871 | 22.2634  | 17.85702 | 21.39111 | 21.10457 |
| 13951 | HYPK      | 1958.157 | -0.27793 | 0.137467 | -2.02178 | 0.043199 | 0.082314 | 1866.403 | 2601.301 | 1968.92  | 1816.951 | 1781.879 | 1713.49  |
| 14110 | SNED1     | 874.8746 | -0.27807 | 0.13962  | -1.9916  | 0.046415 | 0.087441 | 1064.658 | 822.76   | 992.8087 | 767.8517 | 752.967  | 848.2027 |
| 25248 | LOC119621 | 3.863775 | -0.27811 | 1.338403 | -0.20779 | 0.835391 | 0.879628 | 1.084173 | 6.568942 | 4.87012  | 2.232127 | 6.417332 | 2.009959 |
| 22247 | H1-6      | 42.68456 | -0.27818 | 0.406149 | -0.68492 | 0.493397 | 0.589605 | 41.19856 | 42.15071 | 56.35424 | 46.87467 | 36.36488 | 33.16432 |
| 11832 | SLC25A29  | 1211.787 | -0.27821 | 0.113963 | -2.44124 | 0.014637 | 0.032887 | 1419.182 | 1245.362 | 1322.585 | 1024.546 | 1129.45  | 1129.597 |
| 13688 | RALBP1    | 6111.086 | -0.27834 | 0.134352 | -2.07171 | 0.038293 | 0.074373 | 6109.313 | 8176.69  | 5813.531 | 5359.337 | 5245.099 | 5962.543 |
| 14811 | LOC103231 | 4783.835 | -0.27892 | 0.149089 | -1.87086 | 0.061365 | 0.110147 | 6177.616 | 4006.507 | 5553.328 | 4433.004 | 3899.599 | 4632.955 |
| 9482  | LOC103231 | 2081.23  | -0.27928 | 0.09344  | -2.98888 | 0.0028   | 0.007851 | 2276.221 | 2328.69  | 2239.559 | 1850.433 | 1942.312 | 1850.167 |
| 13745 | ARL6      | 830.2341 | -0.27946 | 0.135639 | -2.0603  | 0.03937  | 0.076147 | 962.2033 | 831.5185 | 932.9758 | 850.4404 | 720.8803 | 683.386  |
| 12017 | LIPA      | 1775.058 | -0.27946 | 0.116272 | -2.40352 | 0.016238 | 0.035923 | 2067.517 | 1810.838 | 1968.224 | 1549.096 | 1473.847 | 1780.824 |
| 24095 | TTC23L    | 15.10145 | -0.27949 | 0.714177 | -0.39135 | 0.695538 | 0.767416 | 11.38381 | 20.80165 | 16.69755 | 11.16063 | 23.53022 | 7.034856 |
| 15965 | CCDC34    | 782.6485 | -0.27955 | 0.167167 | -1.67226 | 0.094473 | 0.157317 | 724.2274 | 1075.664 | 772.9576 | 700.8879 | 750.8278 | 671.3263 |
| 13292 | CCDC6     | 4596.421 | -0.27955 | 0.13004  | -2.14973 | 0.031576 | 0.063155 | 4487.933 | 6044.521 | 4592.523 | 4028.989 | 3925.268 | 4499.293 |
| 12695 | PICK1     | 1014.341 | -0.27987 | 0.123787 | -2.26091 | 0.023765 | 0.049767 | 1168.738 | 996.2895 | 1175.786 | 892.8508 | 885.5918 | 966.7902 |
| 12074 | CCDC137   | 1597.409 | -0.28    | 0.117005 | -2.39303 | 0.01671  | 0.036793 | 1882.666 | 1617.054 | 1760.896 | 1464.275 | 1304.858 | 1554.703 |
| 11340 | ATP8B2    | 4514.991 | -0.28001 | 0.109892 | -2.54803 | 0.010833 | 0.025397 | 5417.611 | 4579.1   | 4865.945 | 3962.025 | 3766.974 | 4498.288 |
| 12672 | ZMAT2     | 4280.176 | -0.28016 | 0.12363  | -2.26615 | 0.023442 | 0.04918  | 4366.506 | 5578.674 | 4138.906 | 3870.508 | 3764.835 | 3961.629 |
| 21567 | TRNA5-GC1 | 58.60899 | -0.28026 | 0.352835 | -0.7943  | 0.427019 | 0.526349 | 63.96619 | 61.31012 | 69.57314 | 42.41041 | 47.06043 | 67.33362 |
| 17829 | LOC103241 | 273.62   | -0.28035 | 0.204293 | -1.37231 | 0.169966 | 0.253438 | 313.3259 | 285.2016 | 298.4688 | 220.9806 | 318.7275 | 205.0158 |
| 13748 | NEDD4L    | 1151.912 | -0.28049 | 0.136228 | -2.05899 | 0.039495 | 0.076373 | 1188.253 | 1450.641 | 1155.61  | 1042.403 | 936.9305 | 1137.637 |
| 9667  | CPNE3     | 7224.823 | -0.28057 | 0.095398 | -2.94103 | 0.003271 | 0.008996 | 7576.199 | 8628.852 | 7574.427 | 6236.563 | 6522.148 | 6810.746 |
| 12420 | SNX18     | 2350.296 | -0.28062 | 0.12112  | -2.31687 | 0.020511 | 0.043903 | 2396.564 | 2985.037 | 2355.051 | 2120.521 | 2023.599 | 2221.005 |
| 9961  | MTA2      | 4274.82  | -0.28063 | 0.097698 | -2.87238 | 0.004074 | 0.010873 | 4680.374 | 4932.18  | 4461.725 | 3810.241 | 3610.819 | 4153.58  |
| 10692 | SYDE1     | 2477.269 | -0.28095 | 0.104272 | -2.69436 | 0.007052 | 0.017535 | 2770.603 | 2595.279 | 2794.057 | 2238.823 | 2042.851 | 2422.001 |
| 10129 | HSF2      | 1691.946 | -0.281   | 0.099248 | -2.83127 | 0.004636 | 0.012169 | 1782.38  | 1927.437 | 1858.994 | 1564.721 | 1484.543 | 1533.599 |
| 25931 | LOC119621 | 0.744404 | -0.28102 | 2.817017 | -0.09976 | 0.920536 | 0.943748 | 1.084173 | 0.547412 | 0.695731 | 0        | 2.139111 | 0        |
| 14574 | SIN3A     | 3087.356 | -0.28104 | 0.147086 | -1.91071 | 0.056041 | 0.102227 | 2913.172 | 4271.454 | 2978.426 | 2653.999 | 2776.566 | 2930.52  |
| 10861 | DPH1      | 3747.386 | -0.28108 | 0.105767 | -2.65758 | 0.00787  | 0.019265 | 3958.857 | 4471.26  | 3909.315 | 3392.833 | 3105.989 | 3646.066 |
| 17185 | ENK1      | 468.9328 | -0.28112 | 0.191272 | -1.46974 | 0.141631 | 0.219102 | 552.9281 | 396.8736 | 595.5461 | 462.0503 | 352.9533 | 453.2457 |
| 24017 | LOC119621 | 14.06599 | -0.28123 | 0.696279 | -0.40391 | 0.686278 | 0.75964  | 16.26259 | 20.80165 | 9.044508 | 13.39276 | 12.83466 | 12.05975 |
| 20586 | LOC119621 | 81.28895 | -0.28125 | 0.29945  | -0.93921 | 0.347624 | 0.448925 | 98.11763 | 93.06001 | 77.22618 | 75.89232 | 62.03421 | 81.40334 |
| 14045 | ANP32E    | 5489.233 | -0.28136 | 0.140271 | -2.00584 | 0.044873 | 0.084938 | 5350.935 | 7546.072 | 5172.067 | 4955.322 | 4808.721 | 5102.281 |
| 11049 | WDR76     | 3921.69  | -0.28139 | 0.107577 | -2.61575 | 0.008903 | 0.021422 | 4137.745 | 4751.535 | 4023.415 | 3607.117 | 3255.726 | 3754.603 |
| 11294 | RC3H2     | 6076.146 | -0.28145 | 0.109945 | -2.5599  | 0.01047  | 0.024646 | 6520.215 | 7454.654 | 6031.295 | 5328.087 | 5185.204 | 5937.419 |
| 23380 | TRNAK-UU  | 25.8674  | -0.2815  | 0.560582 | -0.50216 | 0.615554 | 0.699935 | 34.69353 | 14.23271 | 36.17803 | 22.32127 | 25.66933 | 22.10955 |
| 25829 | TRNAP-AG  | 1.160887 | -0.28152 | 2.440978 | -0.11533 | 0.908182 | 0.934763 | 1.084173 | 2.737059 | 0        | 0        | 2.139111 | 1.004979 |
| 13000 | ZNF558    | 816.4262 | -0.28153 | 0.127767 | -2.2035  | 0.027559 | 0.056359 | 954.072  | 889.5442 | 848.7923 | 698.6557 | 699.4892 | 808.0035 |
| 25926 | MYOCOS    | 0.759907 | -0.28153 | 2.801256 | -0.1005  | 0.919945 | 0.943329 | 1.084173 | 0.547412 | 0.695731 | 2.232127 | 0        | 0        |
| 22054 | LOC103241 | 50.04587 | -0.28167 | 0.393542 | -0.71574 | 0.474153 | 0.571568 | 43.909   | 60.76271 | 58.44144 | 55.80317 | 49.19955 | 32.15934 |
| 20594 | LOC119621 | 109.5647 | -0.28176 | 0.300154 | -0.9387  | 0.347883 | 0.449086 | 92.69677 | 145.0641 | 121.0573 | 129.4634 | 87.70354 | 81.40334 |
| 11444 | PMF1      | 943.3095 | -0.28199 | 0.111581 | -2.52722 | 0.011497 | 0.026708 | 1059.237 | 1033.514 | 1015.072 | 845.9761 | 825.6967 | 880.362  |
| 25621 | LOC103241 | 1.598742 | -0.28209 | 1.919385 | -0.14697 | 0.883156 | 0.916385 | 2.168345 | 1.094824 | 2.087194 | 2.232127 | 0        | 2.009959 |
| 20826 | TRNAP-UG  | 165.2968 | -0.2822  | 0.313212 | -0.90099 | 0.367594 | 0.469265 | 226.05   | 100.7238 | 218.4597 | 162.9453 | 119.7902 | 163.8117 |
| 11028 | BRD1      | 2026.407 | -0.28222 | 0.107574 | -2.6235  | 0.008703 | 0.020979 | 2198.16  | 2346.207 | 2133.808 | 1805.791 | 1685.619 | 1988.854 |
| 12501 | SLC26A6   | 1458.846 | -0.28244 | 0.122728 | -2.30133 | 0.021373 | 0.045453 | 1696.188 | 1497.171 | 1617.575 | 1279.009 | 1180.789 | 1482.345 |
| 25191 | LOC119611 | 3.506696 | -0.28249 | 1.308946 | -2.21582 | 0.829131 | 0.874945 | 2.710432 | 6.02153  | 2.782925 | 2.232127 | 4.278221 | 3.014938 |
| 21695 | LOC119621 | 50.84157 | -0.2825  | 0.363127 | -0.77796 | 0.436592 | 0.534999 | 58.54533 | 60.2153  | 48.00546 | 46.87467 | 49.19955 | 42.20914 |
| 11828 | BCL7C     | 2051.176 | -0.28252 | 0.115676 | -2.44233 | 0.014593 | 0.032799 | 2088.659 | 2196.764 | 2464.976 | 2046.86  | 1771.184 | 1738.614 |
| 10448 | R3HDM4    | 3349.821 | -0.28256 | 0.102536 | -2.75573 | 0.005856 | 0.014901 | 3899.769 | 3449.242 | 3688.768 | 2874.98  | 2904.912 | 3281.258 |
| 19074 | HOMB2     | 318.4822 | -0.28257 | 0.240676 | -1.17406 | 0.240371 | 0.335024 | 249.9018 | 488.2913 | 309.6005 | 292.4086 | 297.3364 | 273.3544 |
| 14028 | HEMK1     | 1018.978 | -0.28273 | 0.140813 | -2.00786 | 0.044658 | 0.084627 | 1234.873 | 958.5181 | 1166.742 | 823.6549 | 924.0958 | 1005.984 |
| 24882 | LOC103221 | 5.460742 | -0.28284 | 1.050606 | -0.26922 | 0.787761 | 0.841677 | 4.336691 | 6.568942 | 6.957314 | 4.464254 | 6.417332 | 4.019918 |
| 12008 | ATPAF2    | 1071.811 | -0.28301 | 0.117695 | -2.40459 | 0.016191 | 0.035845 | 1192.59  | 1242.625 | 1098.56  | 946.4218 | 915.5394 | 1035.129 |
| 25640 | LOC103231 | 1.597854 | -0.28303 | 1.964399 | -0.14408 | 0.885437 | 0.918074 | 2.710432 | 0.547412 | 2.087194 | 2.232127 | 0        | 2.009959 |
| 9347  | CDK7      | 1889.116 | -0.28306 | 0.093736 | -3.01978 | 0.00253  | 0.007195 | 2084.864 | 2092.755 | 2045.45  | 1703.113 | 1674.924 | 1733.59  |
| 22385 | LOC119621 | 36.91736 | -0.28319 | 0.428578 | -0.66077 | 0.508759 | 0.604215 | 41.74065 | 36.12918 | 44.52681 | 24.5534  | 36.36488 | 38.18922 |
| 14146 | STRN      | 2630.385 | -0.28327 | 0.142613 | -1.9863  | 0.047    | 0.088328 | 2546.18  | 3595.948 | 2522.026 | 2339.269 | 2333.77  | 2445.115 |
| 12427 | MUS81     | 1648.308 | -0.28331 | 0.122338 | -2.31581 | 0.020568 | 0.043998 | 1935.79  | 1609.391 | 1889.606 | 1354.901 | 1478.125 | 1622.037 |
| 12739 | TGM4      | 606.9527 | -0.28338 | 0.125924 | -2.2504  | 0.024423 | 0.050969 | 658.6349 | 656.8942 | 684.5997 | 544.639  | 541.195  | 555.7536 |
| 12901 | MACIR     | 872.9502 | -0.2835  | 0.127772 | -2.21877 | 0.026503 | 0.054578 | 1022.375 | 887.3546 | 965.6751 | 854.9046 | 714.463  | 792.9288 |
| 25004 | CACNG8    | 4.753469 | -0.28355 | 1.156759 | -0.24512 | 0.806363 | 0.857349 | 3.252518 | 4.379295 | 8.348776 | 2.232127 | 4.278221 | 6.029877 |
| 12873 | XRC1      | 1151.904 | -0.28358 | 0.127499 | -2.22416 | 0.026138 | 0.053979 | 1175.785 | 1416.154 | 1207.094 | 977.6716 | 1001.104 | 1133.617 |
| 13435 | USP19     | 3970.069 | -0.28373 | 0.133805 | -2.12045 | 0.033968 | 0.067217 | 4847.878 | 3716.379 | 4521.558 | 3287.923 | 3292.091 | 4154.585 |
| 25921 | LOC119611 | 0.745292 | -0.28392 | 2.816197 | -0.10082 | 0.919697 | 0.94322  | 0.542086 | 1.094824 | 0.695731 | 0        | 2.139111 | 0        |
| 9385  | NPC1      | 4572.994 | -0.28396 | 0.094304 | -3.01114 | 0.002603 | 0.007373 | 4960.632 | 5231.067 | 4880.556 | 3993.275 | 3927.407 | 4445.024 |
| 22139 | LOC103231 | 39.66652 | -0.2     |          |          |          |          |          |          |          |          |          |          |



|       |           |          |          |          |          |          |          |          |          |          |          |          |          |
|-------|-----------|----------|----------|----------|----------|----------|----------|----------|----------|----------|----------|----------|----------|
| 8994  | HSPA5     | 38588.97 | -0.28422 | 0.091128 | -3.11885 | 0.001816 | 0.005367 | 42238.29 | 44563.7  | 40339.2  | 34057.79 | 32813.96 | 37520.91 |
| 13309 | SPINDOC   | 1826.148 | -0.28425 | 0.132501 | -2.14526 | 0.031932 | 0.063785 | 1846.346 | 2381.241 | 1789.421 | 1698.649 | 1550.855 | 1690.375 |
| 9399  | VPS4A     | 5319.358 | -0.28446 | 0.094588 | -3.00735 | 0.002635 | 0.007454 | 5717.927 | 6304.542 | 5506.714 | 4803.537 | 4609.783 | 4973.643 |
| 14418 | CCDC82    | 1545.997 | -0.28448 | 0.146639 | -1.94002 | 0.052377 | 0.096577 | 1516.216 | 2084.544 | 1493.04  | 1299.098 | 1478.125 | 1404.961 |
| 9359  | GDE1      | 2833.27  | -0.28458 | 0.094344 | -3.01638 | 0.002558 | 0.007267 | 3199.936 | 3046.894 | 3093.222 | 2580.339 | 2397.943 | 2681.285 |
| 14245 | PRDM11    | 485.7129 | -0.28463 | 0.144585 | -1.96857 | 0.049003 | 0.091446 | 535.0392 | 547.4118 | 514.1455 | 435.2648 | 483.439  | 398.9768 |
| 13533 | PTPN21    | 1202.578 | -0.28463 | 0.135456 | -2.10129 | 0.035616 | 0.069965 | 1263.603 | 1538.227 | 1162.567 | 1087.046 | 1020.356 | 1143.667 |
| 13295 | HSD17B7   | 1398.645 | -0.28467 | 0.132471 | -2.14891 | 0.031642 | 0.063272 | 1713.535 | 1286.965 | 1610.618 | 1234.366 | 1227.85  | 1318.533 |
| 9289  | RYK       | 3305.359 | -0.28473 | 0.093833 | -3.03447 | 0.00241  | 0.006896 | 3558.797 | 3870.202 | 3463.351 | 2890.604 | 3033.259 | 3015.943 |
| 16132 | SCN3B     | 287.6302 | -0.28481 | 0.173688 | -1.63979 | 0.101048 | 0.166522 | 307.363  | 348.7013 | 290.8157 | 270.0874 | 254.5542 | 254.2598 |
| 12159 | TTL7      | 1764.305 | -0.28486 | 0.120013 | -2.37357 | 0.017617 | 0.038518 | 1871.824 | 2204.427 | 1735.154 | 1645.078 | 1578.664 | 1550.683 |
| 10704 | ELMOD2    | 1190.001 | -0.28494 | 0.105912 | -2.69038 | 0.007137 | 0.017726 | 1292.334 | 1345.538 | 1286.407 | 1037.939 | 1065.277 | 1112.512 |
| 11728 | ZNFS36    | 966.7182 | -0.28507 | 0.115675 | -2.46437 | 0.013725 | 0.031113 | 1125.371 | 1022.565 | 1038.727 | 899.5472 | 825.6967 | 888.4019 |
| 11231 | MTSS2     | 2367.395 | -0.28509 | 0.110753 | -2.57411 | 0.01005  | 0.023789 | 2450.772 | 2801.106 | 2555.421 | 2154.003 | 1931.617 | 2311.453 |
| 14483 | RDH14     | 513.3747 | -0.28516 | 0.14787  | -1.92844 | 0.053801 | 0.098757 | 585.9954 | 578.6143 | 530.843  | 470.9788 | 404.2919 | 509.5246 |
| 14823 | TBX18     | 708.2667 | -0.2852  | 0.152674 | -1.86803 | 0.061757 | 0.110762 | 731.8166 | 895.0183 | 711.7332 | 558.0317 | 637.455  | 715.5454 |
| 14692 | TAF13     | 744.4277 | -0.28529 | 0.15084  | -1.89135 | 0.058578 | 0.105996 | 730.1903 | 949.2121 | 769.4789 | 703.12   | 716.6021 | 597.9628 |
| 9217  | NF2       | 6498.677 | -0.28538 | 0.093558 | -3.05031 | 0.002286 | 0.006594 | 7256.368 | 7102.121 | 7068.631 | 5687.46  | 5486.819 | 6390.664 |
| 10881 | HTD2      | 2158.081 | -0.28545 | 0.107568 | -2.65362 | 0.007963 | 0.019457 | 2589.547 | 2179.794 | 2346.702 | 1879.451 | 1920.921 | 2032.068 |
| 15523 | LOC119627 | 342.3336 | -0.28545 | 0.164195 | -1.73846 | 0.08213  | 0.140657 | 377.8342 | 403.9899 | 347.17   | 279.0159 | 329.423  | 316.5685 |
| 22101 | CUNH6orf1 | 64.12077 | -0.28579 | 0.403088 | -0.709   | 0.478327 | 0.575373 | 95.4072  | 38.86624 | 77.22618 | 64.73168 | 49.19955 | 59.29379 |
| 12334 | MRTFA     | 1546.307 | -0.28585 | 0.122303 | -2.33722 | 0.019428 | 0.041875 | 1586.145 | 1843.136 | 1673.93  | 1386.151 | 1242.823 | 1545.658 |
| 21790 | LOC119618 | 52.19538 | -0.28587 | 0.375611 | -0.76109 | 0.446601 | 0.544878 | 67.21871 | 44.88777 | 59.13717 | 55.80317 | 44.92132 | 41.20416 |
| 10291 | GEMIN5    | 3650.145 | -0.28588 | 0.102461 | -2.79015 | 0.005268 | 0.013609 | 4067.816 | 4130.77  | 3841.829 | 3149.531 | 3073.902 | 3637.021 |
| 25306 | LOC119628 | 2.757853 | -0.2859  | 1.442966 | -0.19813 | 0.842941 | 0.885544 | 4.336691 | 2.737059 | 2.087194 | 2.232127 | 2.139111 | 3.014938 |
| 24541 | LOC119620 | 8.89575  | -0.28592 | 0.882505 | -0.32399 | 0.745947 | 0.808076 | 9.215468 | 12.04306 | 7.653045 | 4.464254 | 14.97377 | 5.024897 |
| 10269 | MICAL1    | 2120.446 | -0.28593 | 0.102266 | -2.79593 | 0.005175 | 0.013398 | 2407.406 | 2354.418 | 2233.298 | 1899.54  | 1781.879 | 2046.138 |
| 16804 | NUDT13    | 244.8379 | -0.28595 | 0.187569 | -1.52453 | 0.127375 | 0.201521 | 293.8108 | 244.1457 | 271.3352 | 212.0521 | 207.4937 | 240.1901 |
| 12615 | TMEM41A   | 760.5805 | -0.28607 | 0.125524 | -2.27898 | 0.022668 | 0.047771 | 874.3853 | 813.454  | 820.963  | 622.7634 | 729.4367 | 702.4806 |
| 23132 | LOC119621 | 24.68457 | -0.28614 | 0.530289 | -0.53959 | 0.589483 | 0.677448 | 31.9831  | 20.80165 | 27.82925 | 29.01765 | 21.39111 | 17.08465 |
| 14821 | TIMM29    | 564.7362 | -0.28633 | 0.15326  | -1.86827 | 0.061724 | 0.110716 | 682.4867 | 546.8644 | 636.5942 | 497.7643 | 459.9088 | 564.7985 |
| 9804  | ZNF687    | 2085.613 | -0.28641 | 0.098619 | -2.90423 | 0.003682 | 0.009983 | 2333.14  | 2218.113 | 2330.004 | 1863.826 | 1779.74  | 1988.854 |
| 25133 | LOC119619 | 4.773181 | -0.28645 | 1.269228 | -0.22569 | 0.821446 | 0.868903 | 6.505036 | 4.379295 | 5.565851 | 0        | 2.139111 | 10.04979 |
| 16729 | TTC32     | 291.9025 | -0.28652 | 0.186635 | -1.53755 | 0.124158 | 0.197306 | 340.9723 | 272.6111 | 347.8657 | 245.534  | 295.1973 | 249.2349 |
| 21193 | LOC103238 | 58.46364 | -0.28657 | 0.336653 | -0.85124 | 0.394635 | 0.495049 | 63.42411 | 59.66789 | 69.57314 | 49.10679 | 57.75599 | 51.25395 |
| 10720 | OVCA2     | 1499.034 | -0.2866  | 0.106668 | -2.6868  | 0.007214 | 0.01789  | 1659.326 | 1722.705 | 1564.7   | 1292.402 | 1321.97  | 1433.101 |
| 10207 | SF3B1     | 24934.53 | -0.28666 | 0.101815 | -2.81547 | 0.004871 | 0.012686 | 25937.21 | 30629.33 | 25649.53 | 21856.99 | 21564.37 | 23969.77 |
| 12783 | LOC103220 | 703.0069 | -0.28668 | 0.127837 | -2.24253 | 0.024927 | 0.051841 | 819.6346 | 737.9111 | 757.6515 | 622.7634 | 678.0981 | 601.9827 |
| 12029 | CUNH18orf | 761.017  | -0.28668 | 0.119383 | -2.40135 | 0.016335 | 0.036101 | 876.0116 | 827.6867 | 804.9612 | 685.263  | 688.7936 | 683.386  |
| 24600 | LOC119623 | 7.894553 | -0.28674 | 0.90605  | -0.31647 | 0.751647 | 0.812298 | 8.131296 | 12.04306 | 6.261582 | 4.464254 | 6.417332 | 10.04979 |
| 15102 | METTL18   | 526.9692 | -0.28687 | 0.158174 | -1.81365 | 0.069731 | 0.122752 | 508.477  | 674.4114 | 555.1936 | 495.5322 | 442.7959 | 485.4051 |
| 14868 | ZNF280C   | 1625.702 | -0.28699 | 0.154334 | -1.85956 | 0.062947 | 0.112554 | 1562.293 | 2254.242 | 1545.219 | 1370.526 | 1497.377 | 1524.554 |
| 12324 | RBM41     | 2038.927 | -0.28716 | 0.122673 | -2.34087 | 0.019239 | 0.041502 | 2133.652 | 2598.016 | 1990.487 | 1821.416 | 1876     | 1813.988 |
| 12313 | CMTR2     | 851.1712 | -0.28724 | 0.122612 | -2.34268 | 0.019146 | 0.041346 | 981.1763 | 861.0788 | 968.4581 | 729.9055 | 780.7754 | 788.9089 |
| 13644 | CUNH10orf | 1068.17  | -0.28744 | 0.138149 | -2.08067 | 0.037464 | 0.072997 | 1146.513 | 1037.345 | 1337.891 | 1069.189 | 883.4527 | 934.6309 |
| 17152 | CDK5R1    | 261.9563 | -0.2876  | 0.19515  | -1.47376 | 0.140546 | 0.217915 | 280.2587 | 282.4645 | 301.2517 | 283.4801 | 186.1026 | 238.1801 |
| 13654 | COMMD6    | 1596.212 | -0.28765 | 0.138419 | -2.07811 | 0.037699 | 0.073402 | 1743.892 | 1481.296 | 2035.71  | 1486.597 | 1527.325 | 1302.453 |
| 15982 | PABPC4L   | 282.2108 | -0.28772 | 0.172438 | -1.66855 | 0.095207 | 0.158367 | 301.9421 | 330.6367 | 298.4688 | 232.1412 | 273.8062 | 256.2698 |
| 16121 | R3HDM1    | 1098.851 | -0.28776 | 0.175243 | -1.64209 | 0.100572 | 0.165852 | 1002.86  | 1579.283 | 1040.814 | 933.0291 | 1082.39  | 954.7305 |
| 12043 | CMAS      | 2066.922 | -0.28779 | 0.120013 | -2.39797 | 0.016486 | 0.036393 | 2140.157 | 2605.68  | 2073.975 | 1832.576 | 1790.436 | 1958.705 |
| 16609 | LOC103233 | 233.6472 | -0.28803 | 0.185091 | -1.55614 | 0.119675 | 0.191547 | 268.8748 | 263.3051 | 239.3316 | 191.9629 | 220.3284 | 218.0805 |
| 13977 | DUSP28    | 437.7032 | -0.28807 | 0.142891 | -2.016   | 0.0438   | 0.083306 | 498.1774 | 455.4466 | 489.7949 | 392.8543 | 400.0137 | 389.932  |
| 17400 | LOC103220 | 227.0382 | -0.2882  | 0.201623 | -1.42941 | 0.152885 | 0.233589 | 268.8748 | 261.1154 | 221.2426 | 207.5878 | 173.268  | 230.1403 |
| 7248  | TSPAN3    | 10727.37 | -0.28838 | 0.078929 | -3.65359 | 0.000259 | 0.000949 | 11751.35 | 12162.94 | 11474    | 9604.842 | 9655.946 | 9715.137 |
| 12889 | USF2      | 1536.482 | -0.28849 | 0.1299   | -2.22089 | 0.026358 | 0.054367 | 1555.246 | 1960.829 | 1555.655 | 1388.383 | 1283.466 | 1475.31  |
| 14770 | TMEM159   | 601.6855 | -0.28851 | 0.153601 | -1.87832 | 0.060337 | 0.108603 | 745.9108 | 556.1704 | 683.2082 | 564.7281 | 513.3866 | 546.7088 |
| 21098 | LOC103222 | 76.01011 | -0.28852 | 0.333392 | -0.8654  | 0.38682  | 0.487422 | 77.51835 | 94.70224 | 77.22618 | 95.98146 | 51.33866 | 59.29379 |
| 12020 | NUB1      | 4711.92  | -0.28876 | 0.12016  | -2.40316 | 0.016254 | 0.03595  | 4782.828 | 6123.896 | 4637.745 | 4254.434 | 4271.804 | 4200.814 |
| 24615 | GPR156    | 8.990726 | -0.28882 | 0.920551 | -0.31374 | 0.753717 | 0.814039 | 4.878777 | 7.116354 | 17.39328 | 6.696381 | 12.83466 | 5.024897 |
| 23175 | LOC119626 | 21.63216 | -0.28894 | 0.541538 | -0.53356 | 0.593645 | 0.680936 | 27.10432 | 21.89647 | 22.2634  | 22.32127 | 17.11289 | 19.09461 |
| 21213 | LOC103233 | 68.12448 | -0.289   | 0.340712 | -0.84823 | 0.396308 | 0.496669 | 73.18166 | 68.42648 | 82.79203 | 64.64254 | 83.42532 | 56.27885 |
| 23608 | LOC103224 | 18.73549 | -0.28908 | 0.618587 | -0.46733 | 0.640266 | 0.720943 | 18.43094 | 16.42235 | 26.43779 | 13.39276 | 25.66933 | 12.05975 |
| 13522 | USP6NL    | 1357.933 | -0.28922 | 0.137509 | -2.1033  | 0.035439 | 0.069676 | 1420.808 | 1773.067 | 1285.016 | 1252.223 | 1223.571 | 1192.911 |
| 11002 | LOC103233 | 2477.349 | -0.28934 | 0.110068 | -2.62876 | 0.00857  | 0.020707 | 2589.005 | 3066.054 | 2520.635 | 2207.574 | 2207.562 | 2273.264 |
| 10478 | MAN2A1    | 2030.384 | -0.28939 | 0.105257 | -2.74941 | 0.00597  | 0.015148 | 2182.982 | 2416.823 | 2103.892 | 1763.38  | 1794.714 | 1920.516 |
| 14543 | LOC119627 | 814.8726 | -0.28966 | 0.151084 | -1.9172  | 0.055212 | 0.100929 | 991.476  | 753.7861 | 948.9776 | 685.263  | 686.6545 | 823.0782 |
| 24913 | LOC119623 | 5.453312 | -0.28967 | 1.106315 | -0.26184 | 0.793447 | 0.846698 | 5.96295  | 3.284471 | 8.348776 | 6.696381 | 6.417332 | 2.009959 |
| 10622 | PPP3CB    | 1576.094 | -0.28979 | 0.10678  | -2.71394 | 0.006649 | 0.016641 | 1689.683 | 1867.222 | 1646.796 | 1363.83  | 1426.787 | 1462.245 |
| 11860 | MDFIC     | 913.3959 | -0.2899  | 0.119097 | -2.43414 | 0.014927 | 0.03346  | 985.513  | 1051.031 | 980.9812 | 752.2268 | 851.366  | 859.2574 |
| 16092 | PADI2     | 267.2996 | -0.29002 | 0.176043 | -1.64742 | 0.099471 | 0.164332 | 273.2115 | 319.6885 | 289.4243 | 232.1412 | 248      |          |



|       |          |          |          |          |          |          |          |          |          |          |          |          |          |
|-------|----------|----------|----------|----------|----------|----------|----------|----------|----------|----------|----------|----------|----------|
| 11619 | CIAPIN1  | 2133.455 | -0.29067 | 0.116771 | -2.48922 | 0.012802 | 0.029291 | 2535.88  | 2061.553 | 2450.366 | 1850.433 | 1850.331 | 2052.168 |
| 8487  | MICALL1  | 3643.685 | -0.29082 | 0.089251 | -3.25848 | 0.00112  | 0.003509 | 4027.16  | 3920.563 | 4087.422 | 3180.781 | 3200.11  | 3446.075 |
| 24808 | CERS3    | 5.855509 | -0.29083 | 1.042284 | -0.27903 | 0.780221 | 0.83608  | 8.131296 | 4.926706 | 6.261582 | 2.232127 | 8.556443 | 5.024897 |
| 11607 | ITFG2    | 1192.978 | -0.291   | 0.116768 | -2.49209 | 0.012699 | 0.029087 | 1398.041 | 1320.905 | 1223.791 | 997.7608 | 1071.694 | 1145.677 |
| 14413 | BAX      | 2565.113 | -0.29112 | 0.149966 | -1.94127 | 0.052226 | 0.096331 | 3264.986 | 2196.764 | 3011.125 | 2341.501 | 2057.824 | 2518.479 |
| 11236 | STX5     | 1363.243 | -0.2912  | 0.113149 | -2.57358 | 0.010065 | 0.023815 | 1593.734 | 1422.723 | 1481.908 | 1334.812 | 1159.398 | 1186.881 |
| 9312  | PRKRIP1  | 1906.37  | -0.29131 | 0.096125 | -3.03058 | 0.002441 | 0.006968 | 2112.511 | 2169.94  | 2010.664 | 1732.131 | 1715.567 | 1697.41  |
| 23581 | LOC10324 | 18.49944 | -0.29135 | 0.617734 | -0.47164 | 0.637182 | 0.718353 | 17.34676 | 26.27577 | 18.08902 | 8.928508 | 19.252   | 21.10457 |
| 20577 | CMTM1    | 76.5827  | -0.29144 | 0.309638 | -0.94122 | 0.346591 | 0.447788 | 82.39713 | 95.24966 | 73.74753 | 80.35657 | 68.45154 | 59.29379 |
| 10098 | OCLN     | 1879.177 | -0.29145 | 0.102662 | -2.83893 | 0.004527 | 0.011917 | 2041.497 | 2207.164 | 1959.18  | 1674.095 | 1636.42  | 1756.704 |
| 23539 | MAK      | 21.85308 | -0.29152 | 0.610212 | -0.47774 | 0.632836 | 0.714635 | 27.10432 | 21.34906 | 22.2634  | 24.5534  | 27.80844 | 8.039836 |
| 18363 | DNAH7    | 153.8959 | -0.29161 | 0.229452 | -1.27088 | 0.203773 | 0.294995 | 167.5047 | 185.0252 | 153.0609 | 147.3204 | 151.8769 | 118.5876 |
| 12470 | PFDN4    | 1623.845 | -0.29175 | 0.126495 | -2.3064  | 0.021088 | 0.044958 | 1663.121 | 1915.941 | 1775.506 | 1524.543 | 1610.75  | 1253.209 |
| 21462 | COLQ     | 101.0828 | -0.292   | 0.361114 | -0.8086  | 0.418748 | 0.518688 | 121.4273 | 99.08154 | 109.9256 | 98.21359 | 132.6249 | 45.22408 |
| 13786 | TMEM186  | 659.8201 | -0.29223 | 0.142639 | -2.04872 | 0.040489 | 0.07808  | 799.5774 | 631.7132 | 745.824  | 609.3707 | 609.6465 | 562.7885 |
| 21201 | LOC10321 | 57.59387 | -0.2923  | 0.343981 | -0.84975 | 0.395465 | 0.495888 | 66.13454 | 58.02565 | 66.09448 | 60.26743 | 42.78221 | 52.25893 |
| 10236 | AGO1     | 6579.481 | -0.29231 | 0.104144 | -2.80683 | 0.005003 | 0.012994 | 6906.18  | 8017.393 | 6813.297 | 5807.994 | 5574.522 | 6357.5   |
| 11369 | CDR2     | 1745.315 | -0.29244 | 0.114939 | -2.54433 | 0.010949 | 0.025602 | 1807.858 | 2154.613 | 1804.727 | 1508.918 | 1563.69  | 1632.087 |
| 11601 | ERRF1    | 3480.34  | -0.29284 | 0.117384 | -2.49473 | 0.012605 | 0.028887 | 3586.443 | 4459.764 | 3450.828 | 3147.299 | 3076.041 | 3161.665 |
| 15184 | POP4     | 375.5746 | -0.2929  | 0.162833 | -1.79879 | 0.072052 | 0.126153 | 431.5008 | 373.8823 | 432.0492 | 363.8367 | 348.675  | 303.5038 |
| 8133  | TTC37    | 9052.528 | -0.29293 | 0.086933 | -3.36958 | 0.000753 | 0.002461 | 10338.67 | 10154.49 | 9415.333 | 8174.049 | 7809.893 | 8422.733 |
| 21428 | LOC11962 | 55.66363 | -0.29293 | 0.359764 | -0.81423 | 0.415515 | 0.515515 | 67.7608  | 54.19377 | 61.22436 | 42.41041 | 64.17332 | 44.2191  |
| 20250 | PPM1J    | 84.55718 | -0.293   | 0.296737 | -0.98742 | 0.323437 | 0.424621 | 104.6227 | 76.09024 | 98.09812 | 75.89232 | 71.28621 | 71.35354 |
| 16719 | LOC10321 | 319.3575 | -0.29304 | 0.190415 | -1.53894 | 0.123818 | 0.196885 | 321.4572 | 412.7485 | 319.3407 | 334.819  | 252.4151 | 275.3644 |
| 10863 | SRP19    | 1279.938 | -0.29348 | 0.110447 | -2.65719 | 0.007788 | 0.019284 | 1393.162 | 1498.814 | 1333.021 | 1171.867 | 1189.346 | 1093.418 |
| 12131 | RCE1     | 1378.944 | -0.29351 | 0.123379 | -2.37894 | 0.017363 | 0.038043 | 1619.754 | 1418.344 | 1525.739 | 1145.081 | 1165.815 | 1398.931 |
| 22830 | SPDYA    | 26.68409 | -0.29357 | 0.499109 | -0.58819 | 0.556407 | 0.64781  | 35.23561 | 25.18094 | 27.13352 | 26.78552 | 25.66933 | 20.09959 |
| 10936 | GJB2     | 1460.719 | -0.29369 | 0.111141 | -2.64253 | 0.008229 | 0.020004 | 1631.138 | 1619.792 | 1582.093 | 1303.562 | 1193.624 | 1434.106 |
| 17285 | RWDD2A   | 245.9804 | -0.2939  | 0.202371 | -1.4523  | 0.146418 | 0.225197 | 280.8007 | 225.5337 | 307.5133 | 194.195  | 241.7195 | 226.1204 |
| 9995  | OXA1L    | 3224.959 | -0.29391 | 0.102674 | -2.86255 | 0.004203 | 0.011178 | 3471.521 | 3670.396 | 3523.184 | 2852.658 | 2648.219 | 3183.775 |
| 14118 | RASSF2   | 704.8711 | -0.29407 | 0.147715 | -1.99079 | 0.046504 | 0.08757  | 751.8738 | 902.1347 | 676.2509 | 640.6204 | 601.0901 | 657.2566 |
| 20636 | LOC11962 | 70.30493 | -0.29431 | 0.316438 | -0.93006 | 0.352341 | 0.453935 | 72.63957 | 73.90059 | 84.87923 | 60.26743 | 74.86887 | 55.27387 |
| 14747 | TMEM203  | 1227.904 | -0.29434 | 0.156448 | -1.88137 | 0.059922 | 0.108024 | 1604.034 | 1060.884 | 1395.637 | 1113.831 | 1018.217 | 1174.821 |
| 16865 | LOC10322 | 375.6403 | -0.29443 | 0.194666 | -1.51247 | 0.130415 | 0.205579 | 496.009  | 379.3564 | 363.1718 | 310.2657 | 408.5701 | 296.4689 |
| 13527 | VPS33B   | 731.4756 | -0.29448 | 0.140065 | -2.10243 | 0.035515 | 0.069799 | 902.5738 | 742.8378 | 776.4362 | 627.2277 | 618.203  | 721.5753 |
| 19810 | BEND4    | 108.9887 | -0.29463 | 0.28019  | -1.05153 | 0.293013 | 0.393224 | 99.74389 | 148.896  | 112.0128 | 84.82083 | 106.9555 | 101.5029 |
| 8437  | GNG10    | 6867.601 | -0.29483 | 0.090105 | -3.27206 | 0.001068 | 0.003364 | 7529.038 | 7371.447 | 7793.583 | 6187.456 | 6558.513 | 5765.567 |
| 13777 | LOC10323 | 665.0817 | -0.2949  | 0.143725 | -2.05181 | 0.040188 | 0.07755  | 781.1465 | 646.4934 | 775.0447 | 584.8173 | 549.7514 | 653.2367 |
| 10938 | RNF40    | 5465.853 | -0.29492 | 0.111653 | -2.64139 | 0.008257 | 0.020068 | 5619.809 | 6712.364 | 5742.567 | 4756.663 | 4549.888 | 5413.824 |
| 9861  | KDM1A    | 4551.353 | -0.29499 | 0.10205  | -2.89068 | 0.003844 | 0.010364 | 4828.363 | 5548.566 | 4671.14  | 4071.4   | 3929.546 | 4259.103 |
| 23455 | CHRNA7   | 19.51227 | -0.29504 | 0.599924 | -0.4918  | 0.622861 | 0.70598  | 20.59928 | 20.25424 | 22.95914 | 13.39276 | 27.80844 | 12.05975 |
| 11377 | LOC10322 | 3611.478 | -0.2951  | 0.116061 | -2.54261 | 0.011003 | 0.025711 | 4370.3   | 3644.12  | 3932.274 | 3071.407 | 3009.729 | 3641.041 |
| 12122 | SLC16A9  | 868.3084 | -0.29515 | 0.123982 | -2.38059 | 0.017285 | 0.037906 | 928.594  | 1043.914 | 900.2764 | 745.5304 | 776.4972 | 815.0383 |
| 9475  | EI24     | 5404.221 | -0.29516 | 0.098655 | -2.99181 | 0.002773 | 0.007781 | 5671.85  | 6577.153 | 5618.031 | 4714.252 | 4881.451 | 4962.589 |
| 12666 | KCNS3    | 626.3637 | -0.29518 | 0.130205 | -2.26704 | 0.023388 | 0.04909  | 732.9008 | 650.3252 | 687.3826 | 582.5851 | 541.195  | 563.7935 |
| 10921 | SUSD5    | 2863.319 | -0.2952  | 0.111535 | -2.64671 | 0.008128 | 0.019786 | 3077.966 | 3453.074 | 2940.161 | 2571.41  | 2344.465 | 2792.838 |
| 11604 | UBQLN4   | 3486.08  | -0.29532 | 0.118465 | -2.49292 | 0.01267  | 0.029027 | 3596.201 | 4425.825 | 3507.182 | 3004.443 | 3016.146 | 3366.681 |
| 9458  | ITGA3    | 55035.08 | -0.29558 | 0.09868  | -2.99538 | 0.002741 | 0.007705 | 62354.57 | 59684.31 | 59931.69 | 47999.66 | 44968.38 | 55271.86 |
| 10085 | TENT2    | 2776.411 | -0.29561 | 0.104051 | -2.84103 | 0.004497 | 0.011854 | 2960.876 | 3383.552 | 2834.41  | 2482.125 | 2509.177 | 2488.329 |
| 18945 | PLEKHG7  | 118.5    | -0.29564 | 0.247195 | -1.19596 | 0.231712 | 0.325155 | 126.8482 | 137.4004 | 125.9274 | 120.5349 | 104.8164 | 95.47305 |
| 12421 | PTPRG    | 1833.97  | -0.29571 | 0.127638 | -2.31676 | 0.020517 | 0.043912 | 1825.205 | 2343.47  | 1897.955 | 1669.631 | 1520.908 | 1746.654 |
| 9554  | EIF4G2   | 29703.47 | -0.29573 | 0.099518 | -2.97159 | 0.002963 | 0.008244 | 31235.56 | 36642.1  | 30337.37 | 26026.6  | 26112.12 | 27867.08 |
| 23157 | LOC10321 | 21.36466 | -0.29573 | 0.551538 | -0.5362  | 0.59182  | 0.679466 | 22.22554 | 27.918   | 20.87194 | 20.08914 | 14.97377 | 22.10955 |
| 10427 | LEMD3    | 1616.685 | -0.29586 | 0.107159 | -2.76098 | 0.005763 | 0.014693 | 1804.063 | 1851.894 | 1692.019 | 1334.812 | 1520.908 | 1496.414 |
| 10617 | SGTA     | 2914.995 | -0.29601 | 0.109008 | -2.71552 | 0.006617 | 0.016569 | 3086.098 | 3423.513 | 3137.053 | 2571.41  | 2376.552 | 2895.346 |
| 12200 | EXOSC10  | 3357.02  | -0.29601 | 0.125089 | -2.36644 | 0.01796  | 0.039137 | 3299.68  | 4383.126 | 3420.215 | 2599.533 | 2981.92  | 3157.645 |
| 11427 | HSPA4    | 12303.49 | -0.29605 | 0.117004 | -2.5303  | 0.011396 | 0.026513 | 12751.5  | 15981.14 | 11952.66 | 10970.9  | 10834.6  | 11330.14 |
| 18855 | ZNF454   | 141.3578 | -0.29609 | 0.244454 | -1.21124 | 0.225803 | 0.318376 | 165.8784 | 137.4004 | 161.4097 | 147.3204 | 132.6249 | 103.5129 |
| 8266  | CLIC4    | 42349.56 | -0.29618 | 0.089107 | -3.32385 | 0.000888 | 0.002855 | 44653.82 | 50873.72 | 44518.46 | 37234.11 | 38078.31 | 38738.94 |
| 20638 | LOC10324 | 83.28326 | -0.29645 | 0.318783 | -0.92993 | 0.352407 | 0.453955 | 79.6867  | 105.6505 | 87.66215 | 82.5887  | 89.84265 | 54.26889 |
| 10580 | AIDA     | 5160.369 | -0.29654 | 0.108742 | -2.72699 | 0.006391 | 0.01606  | 5319.494 | 6396.507 | 5354.349 | 4671.842 | 4316.725 | 4903.295 |
| 21394 | LOC10323 | 56.59998 | -0.29665 | 0.362916 | -0.8174  | 0.413697 | 0.514076 | 77.51835 | 53.64636 | 55.65851 | 44.64254 | 59.8951  | 48.23901 |
| 11376 | RMND5B   | 2371.453 | -0.29675 | 0.1167   | -2.54287 | 0.010995 | 0.025694 | 2811.802 | 2385.073 | 2654.215 | 2040.164 | 1963.704 | 2373.762 |
| 10484 | PCMTD2   | 1207.141 | -0.2968  | 0.107983 | -2.74858 | 0.005985 | 0.015178 | 1383.404 | 1304.482 | 1308.671 | 1044.635 | 1060.999 | 1140.652 |
| 12329 | SNX24    | 789.754  | -0.29682 | 0.126917 | -2.33868 | 0.019352 | 0.041728 | 845.6547 | 947.0224 | 822.3545 | 678.5666 | 695.211  | 749.7147 |
| 15303 | LOC10323 | 380.7738 | -0.29706 | 0.166979 | -1.779   | 0.07524  | 0.130711 | 454.2684 | 367.8607 | 440.398  | 334.819  | 314.4493 | 372.8474 |
| 12557 | TYRO3    | 1247.061 | -0.29707 | 0.129614 | -2.29192 | 0.02191  | 0.046383 | 1491.28  | 1343.349 | 1296.148 | 1127.224 | 971.1562 | 1253.209 |
| 9720  | UBFD1    | 4504.035 | -0.29709 | 0.101572 | -2.92489 | 0.003446 | 0.009424 | 5156.868 | 5044.947 | 4703.84  | 4015.596 | 3692.105 | 4410.855 |
| 10838 | KIF11    | 4541.903 | -0.29722 | 0.111622 | -2.6627  | 0.007752 | 0.019014 | 4617.492 | 5744.54  | 4664.183 | 4066.935 | 3942.381 | 4215.889 |
| 15782 | U2AF1L4  | 481.1154 | -0.29727 | 0.174354 | -1.70496 | 0.088202 | 0.148583 | 462.9418 | 614.7435 | 514.1455 | 493.3001 | 359.3706 | 442.191  |
| 7865  | HNRNPF   | 14346.79 | -0.29732 |          |          |          |          |          |          |          |          |          |          |



|       |           |          |          |          |          |          |          |          |          |          |          |          |          |
|-------|-----------|----------|----------|----------|----------|----------|----------|----------|----------|----------|----------|----------|----------|
| 10277 | TSC2      | 3294.435 | -0.29778 | 0.10657  | -2.79426 | 0.005202 | 0.013456 | 3668.298 | 3508.91  | 3730.512 | 2966.497 | 2633.245 | 3259.148 |
| 14656 | ATXN2     | 1508.887 | -0.29792 | 0.157125 | -1.89605 | 0.057953 | 0.105117 | 1402.377 | 2114.104 | 1474.255 | 1357.133 | 1398.978 | 1306.473 |
| 25566 | TRNAK-UU  | 1.584126 | -0.29792 | 1.912434 | -0.15578 | 0.876205 | 0.911129 | 1.626259 | 1.642235 | 2.087194 | 0        | 2.139111 | 2.009959 |
| 10744 | HIGD1A    | 3481.749 | -0.29801 | 0.11115  | -2.68118 | 0.007336 | 0.018153 | 3891.096 | 3383.552 | 4242.57  | 3223.191 | 3189.414 | 2960.67  |
| 12895 | CCDC57    | 759.2323 | -0.29824 | 0.134345 | -2.21998 | 0.02642  | 0.054472 | 924.2573 | 768.0188 | 819.5716 | 732.1376 | 631.0376 | 680.3711 |
| 12225 | CRYBG3    | 1723.564 | -0.29841 | 0.126354 | -2.36166 | 0.018193 | 0.039564 | 1771.538 | 2197.311 | 1737.937 | 1524.543 | 1458.873 | 1651.181 |
| 10386 | SERPINB1  | 1119.526 | -0.29845 | 0.107788 | -2.76884 | 0.005626 | 0.0144   | 1269.566 | 1227.297 | 1210.573 | 962.0467 | 1007.521 | 1040.154 |
| 10647 | KAT14     | 2365.785 | -0.29845 | 0.110289 | -2.70608 | 0.006808 | 0.017    | 2552.685 | 2900.735 | 2378.01  | 2066.95  | 2081.355 | 2214.975 |
| 10352 | ELP4      | 1318.241 | -0.29848 | 0.107518 | -2.77609 | 0.005502 | 0.014129 | 1422.977 | 1539.869 | 1402.594 | 1145.081 | 1165.815 | 1233.11  |
| 10260 | GGCX      | 3003.732 | -0.2985  | 0.106652 | -2.79877 | 0.00513  | 0.013292 | 3480.737 | 3141.049 | 3326.987 | 2515.607 | 2571.211 | 2986.799 |
| 23834 | BOC       | 19.19555 | -0.29878 | 0.690938 | -0.43243 | 0.665428 | 0.742234 | 27.6464  | 16.42235 | 18.08902 | 22.32127 | 25.66933 | 5.024897 |
| 25028 | LOC103232 | 4.333448 | -0.29885 | 1.241119 | -0.24079 | 0.809715 | 0.860019 | 6.505036 | 6.568942 | 1.391463 | 2.232127 | 4.278221 | 5.024897 |
| 14156 | RPS27L    | 5075.65  | -0.29893 | 0.150649 | -1.9843  | 0.047223 | 0.088684 | 6065.404 | 4173.468 | 6557.964 | 4712.02  | 4706.043 | 4239.003 |
| 12998 | MBD3      | 2884.104 | -0.29901 | 0.13567  | -2.20396 | 0.027527 | 0.056301 | 3478.026 | 2582.142 | 3489.093 | 2662.927 | 2333.77  | 2758.669 |
| 16553 | DDX51     | 1009.455 | -0.29904 | 0.191105 | -1.56478 | 0.117635 | 0.188929 | 1379.61  | 809.0747 | 1157.001 | 852.6725 | 785.0536 | 1073.318 |
| 12366 | FERMT1    | 848.6343 | -0.29904 | 0.128407 | -2.32886 | 0.019867 | 0.042711 | 897.1529 | 1042.272 | 871.0557 | 756.691  | 733.715  | 790.9188 |
| 9211  | VPSS4     | 3376.503 | -0.29943 | 0.098066 | -3.05331 | 0.002263 | 0.006533 | 3716.002 | 3887.719 | 3578.146 | 2781.23  | 3108.128 | 3187.795 |
| 15330 | NDUFAF5   | 508.0246 | -0.29965 | 0.168979 | -1.7733  | 0.07618  | 0.13211  | 642.3723 | 453.8044 | 585.8058 | 426.3363 | 485.5781 | 454.2507 |
| 8984  | SND1      | 6278.394 | -0.29969 | 0.096011 | -3.12145 | 0.0018   | 0.005325 | 7063.385 | 6913.811 | 6814.689 | 5682.995 | 5110.335 | 6085.151 |
| 11850 | NSUN5     | 1589.123 | -0.29994 | 0.12312  | -2.43619 | 0.014843 | 0.033299 | 1891.881 | 1503.74  | 1867.343 | 1370.526 | 1446.039 | 1455.21  |
| 25195 | LOC103227 | 4.230628 | -0.29998 | 1.393955 | -0.2152  | 0.829612 | 0.875346 | 4.878777 | 6.02153  | 2.782925 | 0        | 10.69555 | 1.004979 |
| 11931 | SIAH1     | 1193.35  | -0.30004 | 0.124052 | -2.41868 | 0.015577 | 0.034709 | 1390.452 | 1216.349 | 1351.11  | 991.0644 | 1018.217 | 1192.911 |
| 8840  | RPA1      | 6390.707 | -0.30045 | 0.095099 | -3.1593  | 0.001581 | 0.004756 | 7378.338 | 6886.441 | 6905.134 | 5441.926 | 5497.514 | 6234.893 |
| 13863 | PCGF2     | 642.1614 | -0.30048 | 0.147503 | -2.03714 | 0.041636 | 0.079848 | 630.4464 | 789.9152 | 710.3417 | 551.3354 | 534.7777 | 636.152  |
| 7968  | SEPTIN9   | 17338.91 | -0.30058 | 0.087895 | -3.41974 | 0.000627 | 0.002091 | 19029.94 | 19488.41 | 18906.5  | 15214.18 | 14629.38 | 16765.07 |
| 12500 | GPSM2     | 1036.929 | -0.30065 | 0.130608 | -2.30192 | 0.021339 | 0.045385 | 1123.203 | 1301.745 | 1008.81  | 926.3327 | 919.8176 | 941.6658 |
| 13697 | TBRG4     | 5242.642 | -0.30069 | 0.14537  | -2.06846 | 0.038597 | 0.074914 | 6615.622 | 4657.38  | 6095.303 | 4374.969 | 4235.439 | 5477.138 |
| 8740  | UBA3      | 4639.383 | -0.3007  | 0.094235 | -3.19092 | 0.001418 | 0.004314 | 5044.656 | 5532.144 | 4784.545 | 4158.453 | 4216.187 | 4100.316 |
| 14054 | PBX1      | 808.835  | -0.30078 | 0.150066 | -2.00435 | 0.045033 | 0.085186 | 795.7828 | 1069.643 | 814.7014 | 698.6557 | 714.463  | 759.7645 |
| 12656 | NET1      | 2158.403 | -0.30081 | 0.132552 | -2.26938 | 0.023245 | 0.048829 | 2089.201 | 2859.132 | 2199.903 | 1950.879 | 1884.556 | 1966.745 |
| 9343  | PPM1A     | 4270.777 | -0.30082 | 0.099593 | -3.02046 | 0.002524 | 0.007182 | 4549.189 | 5146.766 | 4451.289 | 3787.919 | 3668.575 | 4020.923 |
| 9519  | USP28     | 1524.928 | -0.30095 | 0.101002 | -2.97967 | 0.002886 | 0.008059 | 1681.01  | 1704.093 | 1669.06  | 1361.597 | 1302.718 | 1431.091 |
| 11846 | ETHE1     | 652.2137 | -0.30096 | 0.123455 | -2.43778 | 0.014778 | 0.033165 | 723.6853 | 718.2043 | 715.9076 | 593.7458 | 598.951  | 562.7885 |
| 9437  | PRK03     | 4772.299 | -0.30105 | 0.100373 | -2.99934 | 0.002706 | 0.007622 | 5066.881 | 5806.945 | 4934.823 | 4194.167 | 4164.848 | 4466.129 |
| 12009 | REPS1     | 2244.582 | -0.30106 | 0.125211 | -2.40442 | 0.016198 | 0.035858 | 2272.426 | 2861.869 | 2304.262 | 1941.95  | 1893.113 | 2193.87  |
| 8980  | PKD2      | 5112.197 | -0.30109 | 0.096415 | -3.12282 | 0.001791 | 0.005303 | 5613.304 | 5988.685 | 5335.564 | 4334.791 | 4498.55  | 4902.29  |
| 12062 | PSENNEN   | 2829.67  | -0.30138 | 0.125859 | -2.39463 | 0.016637 | 0.036669 | 2845.953 | 3715.284 | 2810.059 | 2531.232 | 2569.072 | 2506.419 |
| 10507 | VPS13A    | 6240.141 | -0.30142 | 0.109877 | -2.74323 | 0.006084 | 0.015393 | 6527.262 | 7662.671 | 6486.304 | 5254.427 | 5345.638 | 6164.544 |
| 13948 | ALG1      | 499.2755 | -0.30158 | 0.149107 | -2.02257 | 0.043117 | 0.082181 | 599.5475 | 494.3129 | 562.8467 | 426.3363 | 434.2395 | 478.3702 |
| 14524 | PLAGL2    | 544.3234 | -0.30182 | 0.157225 | -1.91969 | 0.054897 | 0.100461 | 546.9651 | 705.6138 | 552.4107 | 459.8182 | 485.5781 | 515.5545 |
| 22119 | LOC119626 | 40.95781 | -0.30183 | 0.427632 | -0.70581 | 0.480308 | 0.577286 | 46.61943 | 44.34036 | 46.614   | 31.24978 | 25.66933 | 51.25395 |
| 12958 | KLF16     | 1424.888 | -0.30204 | 0.136546 | -2.212   | 0.026967 | 0.055326 | 1702.151 | 1301.198 | 1719.848 | 1303.562 | 1182.928 | 1339.638 |
| 13098 | DIS3L2    | 760.4295 | -0.30218 | 0.138104 | -2.18806 | 0.028665 | 0.058182 | 833.7288 | 933.8846 | 754.8685 | 627.2277 | 680.2372 | 732.63   |
| 9739  | TSR2      | 2336.519 | -0.30222 | 0.103528 | -2.91922 | 0.003509 | 0.009579 | 2686.038 | 2421.75  | 2639.605 | 2051.325 | 1972.26  | 2248.139 |
| 19983 | PTMA      | 28559.93 | -0.30224 | 0.292758 | -1.03237 | 0.301898 | 0.401639 | 24242.64 | 43860.82 | 26517.11 | 26627.04 | 27126.06 | 22985.89 |
| 19036 | LOC103216 | 114.2933 | -0.30232 | 0.256521 | -1.17855 | 0.238576 | 0.333169 | 130.6428 | 108.3875 | 140.5377 | 95.98146 | 102.6773 | 107.5328 |
| 10421 | ZNF268    | 2367.857 | -0.30233 | 0.109482 | -2.76151 | 0.005754 | 0.014678 | 2551.601 | 2867.343 | 2428.102 | 1962.04  | 2218.258 | 2179.8   |
| 22427 | LOC119625 | 29.69313 | -0.30244 | 0.463675 | -0.65228 | 0.514222 | 0.609584 | 29.81475 | 35.58177 | 33.39511 | 24.5534  | 25.66933 | 29.1444  |
| 19303 | LRRRC39   | 108.3512 | -0.30252 | 0.266572 | -1.13485 | 0.256439 | 0.353173 | 124.1378 | 134.1159 | 100.881  | 104.91   | 85.56443 | 100.4979 |
| 9691  | MEITL3    | 2730.521 | -0.30267 | 0.103197 | -2.9329  | 0.003358 | 0.009212 | 3072.003 | 3046.894 | 2935.986 | 2437.83  | 2222.536 | 2668.22  |
| 12327 | CAMLG     | 1854.778 | -0.30278 | 0.129443 | -2.33909 | 0.019331 | 0.04169  | 2275.679 | 1696.429 | 2175.552 | 1647.31  | 1634.281 | 1699.42  |
| 13112 | CUNH1orf  | 830.3456 | -0.30279 | 0.138541 | -2.18558 | 0.028846 | 0.058487 | 865.1698 | 1056.505 | 827.9203 | 732.1376 | 780.7754 | 719.5653 |
| 12343 | ZCCHC10   | 779.762  | -0.30291 | 0.129683 | -2.33575 | 0.019504 | 0.042009 | 829.3921 | 892.8287 | 855.7496 | 752.2268 | 727.2976 | 621.0773 |
| 21475 | LOC119628 | 65.42961 | -0.303   | 0.375293 | -0.80736 | 0.419459 | 0.519222 | 95.4072  | 49.81448 | 70.26887 | 60.26743 | 70.59065 | 46.22906 |
| 19276 | CUNH16orf | 303.1935 | -0.30302 | 0.265834 | -1.1399  | 0.254326 | 0.35076  | 427.7061 | 197.0683 | 381.9565 | 234.3733 | 269.5279 | 308.5287 |
| 21693 | LOC103217 | 46.13708 | -0.30309 | 0.389508 | -0.77814 | 0.436485 | 0.534917 | 47.7036  | 59.66789 | 44.52681 | 49.10669 | 40.6431  | 35.17428 |
| 10118 | GTF3C2    | 3023.197 | -0.30317 | 0.107005 | -2.83323 | 0.004608 | 0.012107 | 3481.279 | 3231.919 | 3315.16  | 2522.303 | 2560.515 | 3028.003 |
| 23307 | LOC103233 | 18.91181 | -0.30318 | 0.591414 | -0.51263 | 0.608211 | 0.693753 | 23.30971 | 15.32753 | 23.65487 | 17.85702 | 19.252   | 14.06971 |
| 10661 | MRS2      | 1270.725 | -0.30323 | 0.11227  | -2.70094 | 0.006914 | 0.017242 | 1369.852 | 1461.042 | 1386.593 | 1066.957 | 1103.781 | 1236.125 |
| 8877  | PGM1      | 3005.27  | -0.30326 | 0.096323 | -3.14834 | 0.001642 | 0.004915 | 3397.255 | 3404.354 | 3162.099 | 2734.356 | 2515.594 | 2817.962 |
| 17432 | UBE3D     | 284.5719 | -0.30346 | 0.213404 | -1.422   | 0.155028 | 0.236428 | 361.5716 | 232.65   | 350.6486 | 241.0697 | 248.1368 | 273.3544 |
| 8997  | RPL36AL   | 7735.172 | -0.30355 | 0.097385 | -3.11697 | 0.001827 | 0.005399 | 7921.508 | 9289.031 | 8421.828 | 7200.842 | 7033.396 | 6544.426 |
| 23435 | LOC119627 | 21.49672 | -0.30363 | 0.614214 | -0.49434 | 0.621063 | 0.704543 | 28.18849 | 19.15941 | 22.95914 | 13.39276 | 34.22577 | 11.05477 |
| 9016  | CUL3      | 6574.619 | -0.30386 | 0.09767  | -3.11112 | 0.001864 | 0.005495 | 7088.863 | 7997.139 | 6708.938 | 5830.316 | 5790.573 | 6031.887 |
| 21598 | LOC103222 | 62.36939 | -0.30393 | 0.384368 | -0.79073 | 0.429102 | 0.528183 | 88.36008 | 55.28859 | 64.70302 | 33.4819  | 62.03421 | 70.34856 |
| 17343 | LOC103212 | 245.5801 | -0.30407 | 0.211142 | -1.4401  | 0.149838 | 0.229686 | 310.0734 | 281.9171 | 219.1554 | 254.4625 | 213.9111 | 193.961  |
| 22985 | RTP1      | 22.06376 | -0.30427 | 0.536987 | -0.56662 | 0.57097  | 0.660397 | 23.30971 | 23.53871 | 25.74206 | 22.32127 | 21.39111 | 16.07967 |
| 11282 | LOC119618 | 939.1651 | -0.30443 | 0.11884  | -2.5617  | 0.010416 | 0.024545 | 1003.944 | 1100.298 | 1006.028 | 830.3512 | 898.4265 | 795.9437 |
| 10767 | MCFD2     | 2802.319 | -0.30451 | 0.113797 | -2.67587 | 0.007454 | 0.018404 | 2844.327 | 3523.142 | 2922.767 | 2412.929 | 2620.411 | 2490.339 |
| 13250 | WRAP73    | 841.0185 | -0.30456 | 0.141147 | -2.15771 | 0.03095  | 0.062099 | 963.2875 | 838.6349 | 992.1129 | 754.4589 | 652.4288 | 845.1877 |
| 8867  | FBH1      | 2647.462 |          |          |          |          |          |          |          |          |          |          |          |



|       |           |          |          |          |          |          |          |          |          |          |          |          |          |
|-------|-----------|----------|----------|----------|----------|----------|----------|----------|----------|----------|----------|----------|----------|
| 10843 | GAN       | 1843.58  | -0.30503 | 0.114584 | -2.66206 | 0.007766 | 0.019042 | 1958.558 | 2292.561 | 1862.473 | 1660.702 | 1612.889 | 1674.296 |
| 8301  | IL6       | 6443.29  | -0.30512 | 0.092107 | -3.31268 | 0.000924 | 0.002959 | 6767.948 | 7734.929 | 6862.694 | 5819.155 | 5728.538 | 5746.473 |
| 13524 | GMDS      | 768.5804 | -0.30515 | 0.145119 | -2.10279 | 0.035484 | 0.069753 | 764.8839 | 994.6473 | 791.0466 | 676.3345 | 660.9852 | 723.5852 |
| 13840 | CHMP6     | 952.2955 | -0.30537 | 0.149564 | -2.04172 | 0.041179 | 0.079105 | 1118.324 | 876.4063 | 1166.046 | 906.2436 | 742.2714 | 904.4815 |
| 13741 | B3GALT6   | 610.6423 | -0.30542 | 0.148155 | -2.0615  | 0.039256 | 0.075949 | 708.5069 | 609.8168 | 712.4289 | 515.6213 | 498.4128 | 619.0674 |
| 13520 | ZFR       | 9098.317 | -0.30555 | 0.145237 | -2.10383 | 0.035393 | 0.069595 | 8757.405 | 12859.8  | 8557.496 | 7946.372 | 8209.907 | 8258.921 |
| 11147 | TADA1     | 1217.42  | -0.30559 | 0.117876 | -2.59249 | 0.009528 | 0.022725 | 1243.004 | 1484.033 | 1312.845 | 1055.796 | 1080.251 | 1128.592 |
| 9012  | INVS      | 2302.303 | -0.30573 | 0.098235 | -3.11225 | 0.001857 | 0.005477 | 2469.745 | 2708.594 | 2460.802 | 2040.164 | 1997.929 | 2136.586 |
| 15558 | DCDC1     | 263.8482 | -0.30576 | 0.176261 | -1.73468 | 0.082797 | 0.141483 | 286.7637 | 280.8223 | 305.4261 | 256.6946 | 235.3022 | 218.0805 |
| 8700  | KIAA1522  | 2376.539 | -0.30576 | 0.095468 | -3.20276 | 0.001361 | 0.004159 | 2546.722 | 2655.495 | 2685.523 | 2095.967 | 2036.433 | 2239.094 |
| 14409 | MCAT      | 900.7614 | -0.30577 | 0.157477 | -1.94169 | 0.052175 | 0.096263 | 1115.614 | 851.7728 | 1026.204 | 787.9408 | 682.3763 | 940.6608 |
| 11379 | IWS1      | 3578.18  | -0.3058  | 0.120292 | -2.54214 | 0.011018 | 0.025741 | 3669.383 | 4638.768 | 3561.449 | 3142.835 | 3140.214 | 3316.432 |
| 16841 | LOC119623 | 471.1545 | -0.3059  | 0.201556 | -1.51767 | 0.129097 | 0.203791 | 438.0058 | 679.8855 | 443.8766 | 479.9073 | 372.2053 | 413.0466 |
| 12386 | ASXL2     | 3852.482 | -0.30593 | 0.131536 | -2.32583 | 0.020027 | 0.042988 | 3833.635 | 5169.21  | 3777.126 | 3328.101 | 3414.021 | 3592.802 |
| 9824  | ZNF706    | 3032.21  | -0.30601 | 0.105517 | -2.90011 | 0.00373  | 0.010095 | 3308.895 | 3595.401 | 3151.663 | 2526.768 | 2958.39  | 2652.141 |
| 24169 | LOC119623 | 10.17866 | -0.30648 | 0.807085 | -0.37974 | 0.704137 | 0.774492 | 10.29964 | 9.853413 | 13.2189  | 6.696381 | 14.97377 | 6.029877 |
| 12106 | KPNA3     | 1031.694 | -0.3065  | 0.128513 | -2.38498 | 0.01708  | 0.037508 | 1068.994 | 1262.332 | 1094.385 | 825.887  | 964.7389 | 973.8251 |
| 10313 | LSM2      | 1517.853 | -0.30653 | 0.110047 | -2.78543 | 0.005346 | 0.013779 | 1704.862 | 1527.826 | 1803.336 | 1354.901 | 1360.474 | 1355.717 |
| 11526 | OCRL      | 5165.676 | -0.30685 | 0.122308 | -2.5088  | 0.012114 | 0.027942 | 5199.15  | 6768.2   | 5174.154 | 4457.558 | 4534.915 | 4860.081 |
| 16161 | NUDT19    | 401.546  | -0.30694 | 0.187813 | -1.63427 | 0.102202 | 0.168124 | 519.8608 | 356.3651 | 458.487  | 368.301  | 312.3102 | 393.952  |
| 12768 | KNL1      | 4610.829 | -0.30698 | 0.136609 | -2.24711 | 0.024633 | 0.051286 | 4566.536 | 6285.93  | 4447.811 | 4118.274 | 3920.99  | 4325.432 |
| 10943 | DNAJC11   | 5113.481 | -0.30733 | 0.116396 | -2.64035 | 0.008282 | 0.020121 | 5278.295 | 6417.856 | 5277.122 | 4607.11  | 4134.901 | 4965.604 |
| 15445 | EML5      | 335.8336 | -0.30736 | 0.175362 | -1.7527  | 0.079654 | 0.137106 | 361.5716 | 411.6537 | 339.5169 | 272.3195 | 346.5359 | 283.4042 |
| 12735 | RAD54L    | 597.9351 | -0.30744 | 0.136575 | -2.25105 | 0.024383 | 0.0509   | 673.8134 | 636.0925 | 679.0338 | 482.1394 | 532.6386 | 583.8931 |
| 10015 | MATR3     | 20900.84 | -0.30753 | 0.10762  | -2.85756 | 0.004269 | 0.011332 | 21591.3  | 26639.8  | 21130.75 | 18450.76 | 18379.24 | 19213.2  |
| 25117 | LOC119623 | 3.209363 | -0.3077  | 1.350243 | -0.22788 | 0.819736 | 0.867647 | 2.710432 | 3.284471 | 4.87012  | 2.232127 | 2.139111 | 4.019918 |
| 25676 | LOC103234 | 1.595749 | -0.30776 | 2.212843 | -0.13908 | 0.889386 | 0.920897 | 1.084173 | 0.547412 | 3.478657 | 4.464254 | 0        | 0        |
| 17065 | FCSK      | 749.5282 | -0.30783 | 0.207262 | -1.48523 | 0.137484 | 0.214181 | 1048.395 | 578.6143 | 864.7941 | 593.7458 | 609.6465 | 801.9736 |
| 10639 | LOC103233 | 1321.722 | -0.30785 | 0.113648 | -2.70878 | 0.006753 | 0.016875 | 1543.32  | 1493.887 | 1352.502 | 1100.439 | 1200.041 | 1240.145 |
| 9490  | TPBG      | 5812.438 | -0.30786 | 0.103085 | -2.98647 | 0.002822 | 0.007906 | 6715.908 | 6155.646 | 6428.558 | 5049.071 | 4748.826 | 5776.622 |
| 10383 | LOC103233 | 2514.995 | -0.30796 | 0.111201 | -2.76939 | 0.005616 | 0.01438  | 2611.23  | 3104.92  | 2635.43  | 2183.02  | 2160.502 | 2394.866 |
| 8901  | CP5F3     | 5054.884 | -0.30799 | 0.097935 | -3.14485 | 0.001662 | 0.004963 | 5560.722 | 6042.332 | 5178.329 | 4426.308 | 4368.064 | 4753.553 |
| 19989 | PCDH8     | 78.29351 | -0.30813 | 0.298778 | -1.03129 | 0.302406 | 0.402187 | 84.56547 | 87.58589 | 86.27069 | 82.5887  | 68.45154 | 60.29877 |
| 17353 | CFI       | 222.2623 | -0.3083  | 0.214282 | -1.43874 | 0.150223 | 0.230144 | 241.2284 | 270.9688 | 224.7212 | 245.534  | 156.1551 | 194.966  |
| 21280 | LOC103233 | 70.89373 | -0.30843 | 0.367854 | -0.83845 | 0.40178  | 0.501941 | 62.88202 | 106.7453 | 64.00729 | 82.5887  | 59.8951  | 49.24399 |
| 8735  | TASOR2    | 4712.702 | -0.30844 | 0.096607 | -3.19278 | 0.001409 | 0.004289 | 5094.528 | 5633.962 | 4919.517 | 4037.918 | 4173.405 | 4416.885 |
| 13251 | PRKG1     | 466.0275 | -0.30846 | 0.142958 | -2.15768 | 0.030953 | 0.0621   | 517.1504 | 514.0197 | 519.0156 | 377.2295 | 423.5439 | 445.2059 |
| 10211 | FDX1      | 1325.412 | -0.30854 | 0.109655 | -2.81377 | 0.004896 | 0.012748 | 1515.673 | 1393.71  | 1485.386 | 1220.973 | 1234.267 | 1102.462 |
| 17074 | SDHAF1    | 209.4637 | -0.30863 | 0.207893 | -1.48457 | 0.137658 | 0.21433  | 216.2925 | 240.3138 | 242.8102 | 167.4095 | 166.8506 | 223.1054 |
| 8794  | HBS1L     | 3683.739 | -0.30871 | 0.097211 | -3.17573 | 0.001495 | 0.004518 | 3913.864 | 4392.432 | 3927.404 | 3205.334 | 3202.249 | 3461.149 |
| 9101  | AKAP10    | 1886.992 | -0.30882 | 0.100169 | -3.08296 | 0.002049 | 0.005987 | 2158.046 | 2081.26  | 2029.448 | 1582.578 | 1704.871 | 1765.749 |
| 13884 | LOC119623 | 1420.3   | -0.30901 | 0.151993 | -2.03308 | 0.042044 | 0.080506 | 1416.472 | 1964.661 | 1333.021 | 1279.009 | 1283.466 | 1245.17  |
| 11442 | SLC46A1   | 2073.712 | -0.3095  | 0.122449 | -2.52763 | 0.011484 | 0.026682 | 2454.567 | 2056.626 | 2380.793 | 1872.755 | 1636.42  | 2041.113 |
| 24741 | LOC119623 | 7.610275 | -0.30954 | 1.062005 | -0.29146 | 0.770697 | 0.828138 | 11.38381 | 1.642235 | 12.52316 | 8.928508 | 2.139111 | 9.044815 |
| 10981 | UBE2R2    | 1804.821 | -0.30972 | 0.117598 | -2.63368 | 0.008447 | 0.020449 | 1930.912 | 2248.22  | 1815.859 | 1640.613 | 1523.047 | 1670.276 |
| 15064 | WDR54     | 922.9287 | -0.30972 | 0.169955 | -1.82236 | 0.0684   | 0.120712 | 1171.991 | 791.5575 | 1105.517 | 821.4227 | 714.463  | 932.6209 |
| 11129 | LOC103233 | 2144.58  | -0.30974 | 0.11928  | -2.59674 | 0.009411 | 0.022482 | 2514.197 | 2191.289 | 2424.624 | 1834.808 | 1734.819 | 2167.741 |
| 14896 | TOMM5     | 630.482  | -0.30981 | 0.166997 | -1.85521 | 0.063567 | 0.113435 | 724.2274 | 550.6963 | 818.8758 | 549.1032 | 588.2554 | 551.7337 |
| 20329 | LOC103223 | 83.89495 | -0.30984 | 0.318733 | -0.97209 | 0.331006 | 0.432869 | 93.23886 | 85.94365 | 96.70666 | 98.21359 | 77.00798 | 52.25893 |
| 23001 | LOC119623 | 22.80886 | -0.30999 | 0.550805 | -0.56279 | 0.57358  | 0.662955 | 27.6464  | 20.80165 | 26.43779 | 20.08914 | 27.80844 | 14.06971 |
| 8899  | ATPAF1    | 2377.997 | -0.31006 | 0.098588 | -3.14501 | 0.001661 | 0.004962 | 2742.957 | 2601.848 | 2558.9   | 2044.628 | 2051.407 | 2268.239 |
| 9765  | PLEKHA7   | 1750.207 | -0.3101  | 0.106454 | -2.91298 | 0.00358  | 0.009746 | 1904.349 | 2062.1   | 1851.341 | 1520.078 | 1493.099 | 1670.276 |
| 23555 | LOC119623 | 16.84409 | -0.31011 | 0.651908 | -0.47569 | 0.634292 | 0.715885 | 17.34676 | 22.44388 | 15.30609 | 13.39276 | 23.53022 | 9.044815 |
| 24191 | LOC119623 | 10.65907 | -0.31013 | 0.825132 | -0.37585 | 0.707029 | 0.777018 | 7.047123 | 10.40082 | 17.39328 | 13.39276 | 10.69555 | 5.024897 |
| 23371 | ARL5C     | 16.21868 | -0.31015 | 0.616783 | -0.50285 | 0.61507  | 0.699655 | 17.34676 | 17.51718 | 18.78475 | 15.62489 | 14.97377 | 13.06473 |
| 9593  | NSMCE4A   | 1690.836 | -0.31031 | 0.104725 | -2.96308 | 0.003046 | 0.008441 | 1842.552 | 2013.928 | 1758.809 | 1535.703 | 1484.543 | 1509.479 |
| 24238 | SPATA18   | 9.783695 | -0.31032 | 0.840089 | -0.36939 | 0.711836 | 0.780775 | 7.589209 | 12.59047 | 11.82743 | 6.696381 | 14.97377 | 5.024897 |
| 20672 | TENT5D    | 58.59014 | -0.31033 | 0.335182 | -0.92585 | 0.354524 | 0.455931 | 64.50828 | 69.5213  | 60.52863 | 49.10679 | 55.61688 | 52.25893 |
| 9786  | DMAC2     | 2162.364 | -0.31046 | 0.106783 | -2.9074  | 0.003644 | 0.009901 | 2513.112 | 2223.039 | 2451.757 | 1926.326 | 1794.714 | 2065.233 |
| 11955 | LOC103233 | 654.4723 | -0.31053 | 0.128676 | -2.41329 | 0.015809 | 0.035156 | 712.8436 | 761.4498 | 696.4271 | 620.5313 | 581.8381 | 553.7437 |
| 23054 | LOC119615 | 20.58728 | -0.31054 | 0.561045 | -0.55351 | 0.579913 | 0.668734 | 26.02015 | 22.44388 | 20.17621 | 13.39276 | 21.39111 | 20.09959 |
| 8549  | ZFX       | 4569.025 | -0.31062 | 0.095848 | -3.24082 | 0.001192 | 0.003706 | 5019.178 | 5438.536 | 4722.625 | 3924.079 | 4070.728 | 4239.003 |
| 9557  | MRPL22    | 1336.235 | -0.31071 | 0.104596 | -2.97056 | 0.002973 | 0.008269 | 1422.435 | 1522.352 | 1492.344 | 1167.402 | 1247.102 | 1165.776 |
| 7111  | LOC103228 | 4917.938 | -0.31074 | 0.084142 | -3.69301 | 0.000222 | 0.000829 | 5567.769 | 5267.744 | 5501.148 | 4303.541 | 4485.715 | 4381.71  |
| 14861 | LOC119623 | 378.0067 | -0.3109  | 0.167109 | -1.86046 | 0.06282  | 0.112379 | 382.1709 | 462.563  | 414.6559 | 325.8905 | 305.8928 | 376.8673 |
| 12822 | INO80C    | 899.884C | -0.31098 | 0.139183 | -2.23431 | 0.025463 | 0.052794 | 1078.752 | 860.5314 | 1054.033 | 725.4413 | 819.2794 | 861.2674 |
| 9538  | VAMP7     | 3396.641 | -0.31101 | 0.104544 | -2.97493 | 0.002931 | 0.008168 | 3469.895 | 4181.679 | 3631.718 | 2970.961 | 3116.684 | 3008.909 |
| 7740  | MARK3     | 4854.661 | -0.31128 | 0.089422 | -3.48103 | 0.000499 | 0.001716 | 5492.419 | 5359.162 | 5284.775 | 4160.685 | 4214.048 | 4616.876 |
| 21089 | LOC103241 | 79.31056 | -0.31129 | 0.35906  | -0.86695 | 0.385969 | 0.486556 | 61.79785 | 121.5254 | 78.61764 | 87.05295 | 70.59065 | 56.27885 |
| 10636 | FANCE     | 1248.536 | -0.3113  | 0.114899 | -2.70934 | 0.006742 | 0.016851 | 1425.687 | 1386.047 | 1342.066 | 1111.599 | 1011.799 | 1214.015 |
|       |           |          |          |          |          |          |          |          |          |          |          |          |          |



|       |           |          |          |          |          |          |          |          |          |          |          |          |          |
|-------|-----------|----------|----------|----------|----------|----------|----------|----------|----------|----------|----------|----------|----------|
| 10499 | MOC53     | 1009.099 | -0.31155 | 0.11351  | -2.74469 | 0.006057 | 0.015337 | 1144.886 | 1100.845 | 1110.387 | 832.5834 | 926.2349 | 939.6558 |
| 6665  | XPO1      | 20327.37 | -0.3116  | 0.080482 | -3.87167 | 0.000108 | 0.000431 | 22455.93 | 23292.92 | 21797.96 | 17910.59 | 17709.7  | 18797.14 |
| 16984 | LOC119615 | 256.8204 | -0.31181 | 0.208573 | -1.49495 | 0.134927 | 0.211195 | 247.1914 | 346.5117 | 260.8993 | 243.3018 | 196.7982 | 246.22   |
| 11145 | ADRM1     | 3029.072 | -0.31186 | 0.120283 | -2.59271 | 0.009522 | 0.022714 | 3532.235 | 2910.041 | 3628.935 | 2707.57  | 2462.116 | 2933.535 |
| 10993 | FANCC     | 1173.584 | -0.3119  | 0.118578 | -2.63037 | 0.008529 | 0.020627 | 1375.273 | 1196.642 | 1331.63  | 1064.725 | 964.7389 | 1108.492 |
| 9470  | E2F1      | 1832.062 | -0.31199 | 0.104261 | -2.99236 | 0.002768 | 0.007771 | 2046.918 | 2083.997 | 1963.354 | 1604.899 | 1529.464 | 1763.739 |
| 19256 | LOC103247 | 117.8702 | -0.31223 | 0.272894 | -1.14416 | 0.252556 | 0.348681 | 116.5486 | 163.6761 | 112.7085 | 100.4457 | 96.25998 | 117.5826 |
| 10700 | USB1      | 1336.059 | -0.31225 | 0.115982 | -2.69219 | 0.007098 | 0.017637 | 1545.488 | 1442.43  | 1459.644 | 1109.367 | 1135.868 | 1323.558 |
| 15067 | ZBED8     | 391.7775 | -0.31232 | 0.171416 | -1.82202 | 0.068452 | 0.120781 | 484.0831 | 371.6926 | 449.4425 | 321.4263 | 340.1186 | 383.9022 |
| 24935 | LOC119625 | 5.050282 | -0.3124  | 1.215764 | -0.25696 | 0.797213 | 0.849936 | 4.336691 | 4.379295 | 7.653045 | 2.232127 | 10.69555 | 1.004979 |
| 25679 | LOC119625 | 1.594434 | -0.31256 | 2.252382 | -0.13877 | 0.889632 | 0.92102  | 0        | 0.547412 | 4.87012  | 0        | 2.139111 | 2.009959 |
| 24801 | LOC119625 | 6.011417 | -0.31262 | 1.114321 | -0.28054 | 0.77906  | 0.8351   | 6.505036 | 7.116354 | 6.261582 | 11.16063 | 0        | 5.024897 |
| 13223 | THUMP2    | 510.0875 | -0.31281 | 0.144549 | -2.164   | 0.030464 | 0.061248 | 570.8169 | 557.2652 | 567.0211 | 511.1571 | 400.0137 | 454.2507 |
| 13083 | LOC103230 | 591.4047 | -0.31288 | 0.142831 | -2.19055 | 0.028484 | 0.057881 | 707.9648 | 633.3555 | 625.4625 | 464.2824 | 579.699  | 537.664  |
| 15947 | LOC103215 | 415.653  | -0.31292 | 0.186652 | -1.67649 | 0.093642 | 0.156094 | 479.2044 | 433.5502 | 475.1845 | 354.9082 | 288.7799 | 462.2906 |
| 15136 | LOC119625 | 419.6072 | -0.31309 | 0.173141 | -1.80828 | 0.070562 | 0.123936 | 472.1572 | 509.093  | 408.3943 | 397.3186 | 417.1266 | 313.5536 |
| 21953 | LOC103215 | 70.19732 | -0.31309 | 0.425717 | -0.73545 | 0.462065 | 0.559558 | 52.58238 | 129.7366 | 50.09266 | 69.19594 | 66.31243 | 53.26391 |
| 12952 | ACIN1     | 9489.452 | -0.31319 | 0.141541 | -2.21269 | 0.026919 | 0.055255 | 9319.549 | 13178.94 | 9050.769 | 8234.316 | 8008.83  | 9144.308 |
| 10426 | ALS2      | 5299.541 | -0.31323 | 0.113446 | -2.76102 | 0.005762 | 0.014693 | 5495.13  | 6697.584 | 5430.183 | 4495.504 | 4575.558 | 5103.286 |
| 8309  | SYAP1     | 4435.735 | -0.3133  | 0.094616 | -3.31122 | 0.000929 | 0.002972 | 4906.966 | 5285.261 | 4553.562 | 3915.151 | 3995.859 | 3957.609 |
| 18296 | ADAM11    | 119.2805 | -0.31334 | 0.243955 | -1.28443 | 0.19899  | 0.289142 | 126.3061 | 134.6633 | 137.0591 | 102.6778 | 98.39909 | 116.5776 |
| 16041 | SIPA1L2   | 242.3689 | -0.3135  | 0.189087 | -1.65794 | 0.097329 | 0.161306 | 267.7907 | 296.1498 | 243.506  | 196.4272 | 218.1893 | 232.1503 |
| 11015 | PUS7L     | 850.407  | -0.31352 | 0.1194   | -2.62581 | 0.008644 | 0.020863 | 924.2573 | 1008.333 | 894.0148 | 774.5481 | 746.5496 | 754.7396 |
| 15257 | SFT2D1    | 1363.896 | -0.31366 | 0.175587 | -1.78634 | 0.074044 | 0.12902  | 1746.06  | 1082.233 | 1710.108 | 1102.671 | 1193.624 | 1348.682 |
| 9808  | TYK2      | 1578.104 | -0.3137  | 0.108049 | -2.90332 | 0.003692 | 0.010008 | 1752.565 | 1705.735 | 1794.987 | 1401.776 | 1292.023 | 1521.539 |
| 10975 | COX5A     | 2868.272 | -0.31389 | 0.119121 | -2.63507 | 0.008412 | 0.020379 | 3414.06  | 2706.404 | 3418.128 | 2656.231 | 2412.917 | 2601.892 |
| 16658 | LOC103246 | 323.0889 | -0.31392 | 0.20299  | -1.54649 | 0.121985 | 0.19468  | 403.8543 | 284.6541 | 389.6096 | 245.534  | 280.2235 | 334.6582 |
| 20501 | LOC119625 | 69.03345 | -0.31409 | 0.331785 | -0.94666 | 0.343813 | 0.445846 | 94.86511 | 65.68942 | 69.57314 | 53.57105 | 64.17332 | 66.32864 |
| 15087 | TP53I13   | 826.2441 | -0.31411 | 0.172724 | -1.81855 | 0.06898  | 0.121551 | 1041.348 | 689.1915 | 1019.942 | 736.6019 | 667.4025 | 802.9786 |
| 12432 | SCAI      | 598.4507 | -0.31412 | 0.135669 | -2.31534 | 0.020594 | 0.044041 | 696.581  | 689.7389 | 603.8948 | 508.925  | 551.8906 | 539.674  |
| 9960  | MXI1      | 1290.078 | -0.31444 | 0.109466 | -2.87245 | 0.004073 | 0.010872 | 1425.687 | 1476.917 | 1388.68  | 1216.509 | 1058.86  | 1173.816 |
| 25136 | LOC119625 | 3.966735 | -0.31446 | 1.396598 | -0.22516 | 0.821856 | 0.869233 | 9.215468 | 2.189647 | 2.087194 | 0        | 4.278221 | 6.029877 |
| 12247 | SSU72     | 5011.48  | -0.31454 | 0.133458 | -2.35684 | 0.018431 | 0.04001  | 4910.218 | 6831.699 | 4923.691 | 4555.771 | 4438.655 | 4408.845 |
| 13168 | CAMSA2P   | 5826.297 | -0.31469 | 0.144539 | -2.17718 | 0.029467 | 0.059492 | 5662.634 | 8182.712 | 5533.847 | 5082.553 | 5044.023 | 5452.014 |
| 10242 | CTDP1     | 1653.85  | -0.31475 | 0.112219 | -2.80477 | 0.005035 | 0.01307  | 1835.504 | 1792.226 | 1881.258 | 1348.205 | 1426.787 | 1639.122 |
| 10055 | SETD5     | 5106.474 | -0.31478 | 0.110439 | -2.85029 | 0.004368 | 0.011549 | 5322.746 | 6461.102 | 5203.375 | 4439.701 | 4432.237 | 4779.682 |
| 18022 | MTLN      | 495.0098 | -0.31501 | 0.235241 | -1.33911 | 0.180534 | 0.266313 | 647.2511 | 330.6367 | 669.9893 | 446.4254 | 406.431  | 469.3254 |
| 12791 | GIN53     | 449.0276 | -0.31504 | 0.140575 | -2.24109 | 0.02502  | 0.052002 | 511.7295 | 497.5973 | 485.6205 | 386.158  | 400.0137 | 413.0466 |
| 12623 | DPAGT1    | 850.7897 | -0.31517 | 0.138435 | -2.27665 | 0.022807 | 0.048033 | 907.4526 | 1052.126 | 873.1429 | 796.8693 | 663.1243 | 812.0234 |
| 13789 | CDC42EP2  | 402.1059 | -0.31521 | 0.153897 | -2.0482  | 0.040541 | 0.078162 | 463.4838 | 428.6235 | 449.4425 | 339.2833 | 335.8404 | 395.9619 |
| 17718 | LOC119625 | 139.5196 | -0.31532 | 0.228198 | -1.38177 | 0.167044 | 0.250641 | 161.5417 | 158.7494 | 142.6249 | 124.9991 | 132.6249 | 116.5776 |
| 9187  | IMP1      | 1318.481 | -0.31533 | 0.103096 | -3.05857 | 0.002224 | 0.006436 | 1478.812 | 1408.491 | 1498.605 | 1154.01  | 1202.18  | 1168.791 |
| 13406 | HOXB6     | 535.9853 | -0.31535 | 0.148331 | -2.12596 | 0.033506 | 0.066445 | 537.7497 | 675.5062 | 569.1083 | 479.9073 | 481.2999 | 472.3404 |
| 22990 | LOC103247 | 21.07577 | -0.31536 | 0.557654 | -0.56551 | 0.571726 | 0.661128 | 24.39389 | 19.70683 | 25.74206 | 24.5534  | 14.97377 | 17.08465 |
| 22430 | LOC103235 | 29.3497  | -0.31572 | 0.484484 | -0.65166 | 0.514622 | 0.609912 | 27.6464  | 39.41365 | 29.91645 | 33.4819  | 23.53022 | 22.10955 |
| 19386 | CHGB      | 124.3878 | -0.31572 | 0.281961 | -1.11973 | 0.262827 | 0.360428 | 121.9694 | 175.7192 | 116.8829 | 84.82083 | 128.3466 | 118.5876 |
| 11719 | NDUFAF6   | 623.8971 | -0.31581 | 0.128088 | -2.46554 | 0.013681 | 0.031035 | 693.3285 | 710.5405 | 669.2936 | 551.3354 | 588.2554 | 530.6292 |
| 8581  | DOCK10    | 6243.705 | -0.31589 | 0.09768  | -3.23391 | 0.001221 | 0.003783 | 6757.107 | 7606.287 | 6412.556 | 5468.711 | 5476.123 | 5741.448 |
| 10405 | TRIM52    | 1733.909 | -0.31604 | 0.114295 | -2.76515 | 0.00569  | 0.014537 | 1945.548 | 2113.557 | 1708.716 | 1544.632 | 1559.412 | 1531.589 |
| 19948 | LOC103245 | 81.7375  | -0.31605 | 0.30443  | -1.03816 | 0.299194 | 0.39874  | 105.7068 | 77.73248 | 89.05362 | 60.26743 | 81.28621 | 76.37844 |
| 8191  | IDH1      | 4597.662 | -0.31624 | 0.09444  | -3.34856 | 0.000812 | 0.002636 | 5353.103 | 4767.409 | 5183.894 | 3962.025 | 4000.137 | 4319.402 |
| 12664 | LOC103235 | 600.6146 | -0.31624 | 0.139458 | -2.26763 | 0.023352 | 0.049022 | 623.3993 | 726.9629 | 649.8131 | 558.0317 | 487.7172 | 557.7636 |
| 8642  | SNX6      | 4122.814 | -0.31624 | 0.098307 | -3.21692 | 0.001296 | 0.003986 | 4681.458 | 4214.524 | 4818.635 | 3669.617 | 3865.373 | 3487.279 |
| 20218 | LOC103245 | 69.46855 | -0.31629 | 0.318177 | -0.99406 | 0.320193 | 0.421027 | 79.6867  | 86.49107 | 64.70302 | 64.73168 | 59.8951  | 61.30375 |
| 8919  | SHCBP1    | 1843.993 | -0.31631 | 0.100759 | -3.13926 | 0.001694 | 0.005049 | 2089.443 | 2067.027 | 1981.443 | 1700.881 | 1529.464 | 1695.4   |
| 20310 | LOC103245 | 71.75319 | -0.31633 | 0.323759 | -0.97706 | 0.328539 | 0.430045 | 82.93921 | 84.84883 | 73.05179 | 55.80317 | 53.47777 | 80.39836 |
| 8468  | HKDC1     | 27387.88 | -0.31678 | 0.09709  | -3.26274 | 0.001103 | 0.003464 | 29683.57 | 32340.54 | 29133.06 | 23479.74 | 22873.51 | 26816.87 |
| 9962  | POLR2K    | 3727.21  | -0.31685 | 0.110318 | -2.8721  | 0.004078 | 0.010881 | 3865.076 | 4292.803 | 4237.7   | 3580.332 | 3473.916 | 2913.435 |
| 13532 | NEMF      | 4222.092 | -0.31687 | 0.150772 | -2.10168 | 0.035582 | 0.069904 | 4119.314 | 5999.633 | 3933.665 | 3549.082 | 3837.565 | 3893.29  |
| 8585  | RNF41     | 2310.463 | -0.31697 | 0.098031 | -3.23335 | 0.001223 | 0.003789 | 2585.752 | 2559.698 | 2549.855 | 2071.414 | 1910.226 | 2185.83  |
| 14079 | PNISR     | 8709.024 | -0.31698 | 0.158646 | -1.99802 | 0.045715 | 0.086316 | 7941.023 | 12806.15 | 8238.851 | 7627.178 | 7730.746 | 7910.193 |
| 15895 | LOC103225 | 226.7817 | -0.31699 | 0.188069 | -1.68548 | 0.091896 | 0.153699 | 245.023  | 268.2318 | 242.8102 | 180.8023 | 211.772  | 212.0507 |
| 8976  | OSBPL8    | 4697.768 | -0.31709 | 0.101524 | -3.1233  | 0.001788 | 0.005296 | 4947.08  | 5809.682 | 4879.164 | 4113.81  | 4229.022 | 4207.849 |
| 7855  | PLRG1     | 3455.552 | -0.3171  | 0.091856 | -3.45214 | 0.000556 | 0.001882 | 3826.588 | 3990.085 | 3688.768 | 3071.407 | 2945.555 | 3210.909 |
| 13032 | RPS19BP1  | 842.2092 | -0.31722 | 0.144303 | -2.19832 | 0.027926 | 0.05696  | 1008.823 | 817.8333 | 982.3727 | 723.2091 | 673.8199 | 847.1977 |
| 13351 | BORCS7    | 762.0963 | -0.31723 | 0.148442 | -2.13704 | 0.032595 | 0.064904 | 851.0756 | 711.0879 | 976.8068 | 660.7096 | 667.4025 | 705.4956 |
| 23802 | ABI3      | 13.78953 | -0.31731 | 0.727486 | -0.43618 | 0.662708 | 0.740194 | 13.55216 | 15.32753 | 16.00182 | 17.85702 | 14.97377 | 5.024897 |
| 15675 | LOC103245 | 229.1341 | -0.31756 | 0.184424 | -1.72188 | 0.085092 | 0.144317 | 256.4069 | 263.8525 | 240.7231 | 216.5163 | 205.3546 | 191.9511 |
| 22264 | LOC119625 | 30.42482 | -0.31761 | 0.466835 | -0.68035 | 0.496281 | 0.5926   | 34.69353 | 35.03436 | 30.61218 | 29.01765 | 32.08666 | 21.10457 |
| 9180  | ALDH2     | 3674.231 | -0.3177  | 0.103799 | -3.06074 | 0.002208 | 0.006394 | 4397.947 | 3885.529 | 3953.841 | 3276.762 | 3011.868 | 3519.438 |



|       |           |          |          |          |          |          |          |          |          |          |          |          |          |
|-------|-----------|----------|----------|----------|----------|----------|----------|----------|----------|----------|----------|----------|----------|
| 17265 | LOC119621 | 497.03   | -0.31801 | 0.21833  | -1.45655 | 0.145242 | 0.223646 | 735.0691 | 387.0202 | 531.5388 | 412.9435 | 500.5519 | 415.0565 |
| 11156 | RGL2      | 2352.598 | -0.31802 | 0.122722 | -2.59134 | 0.00956  | 0.022782 | 2897.452 | 2254.242 | 2685.523 | 2069.182 | 1953.008 | 2256.179 |
| 10103 | PDP1      | 1380.343 | -0.31814 | 0.112082 | -2.8385  | 0.004533 | 0.011927 | 1546.03  | 1628.55  | 1424.858 | 1158.474 | 1225.71  | 1298.433 |
| 10314 | POLH      | 2355.513 | -0.31816 | 0.114221 | -2.78545 | 0.005345 | 0.013779 | 2513.654 | 2934.675 | 2397.49  | 2093.735 | 1976.538 | 2216.985 |
| 10408 | ATP5F1B   | 29781.15 | -0.31846 | 0.115214 | -2.76411 | 0.005708 | 0.01458  | 36589.75 | 29168.29 | 33414.59 | 25551.16 | 24281.05 | 29682.07 |
| 8832  | EXOC7     | 7180.154 | -0.31858 | 0.100742 | -3.16237 | 0.001565 | 0.004711 | 8178.457 | 8071.587 | 7669.047 | 6084.778 | 5946.728 | 7130.329 |
| 12631 | ZNF8      | 545.0318 | -0.31864 | 0.140077 | -2.27478 | 0.022919 | 0.048239 | 576.2378 | 640.4718 | 601.8076 | 482.1394 | 444.935  | 524.5993 |
| 19312 | LOC119624 | 100.587  | -0.31881 | 0.281572 | -1.13225 | 0.257527 | 0.354432 | 124.1378 | 101.8186 | 107.1426 | 84.82083 | 111.2338 | 74.36848 |
| 10758 | KIF5B     | 27912.48 | -0.31884 | 0.119052 | -2.67819 | 0.007402 | 0.018292 | 28363.04 | 36967.27 | 27624.01 | 24486.43 | 24488.54 | 25545.57 |
| 8356  | CEPT1     | 1639.296 | -0.31893 | 0.09679  | -3.29502 | 0.000984 | 0.003131 | 1859.356 | 1784.563 | 1814.467 | 1479.9   | 1450.317 | 1447.17  |
| 20676 | LOC119625 | 103.9387 | -0.31916 | 0.344971 | -0.92519 | 0.354865 | 0.456282 | 82.39713 | 174.077  | 89.74935 | 78.12444 | 104.8164 | 94.46807 |
| 8773  | PPP2R1B   | 2288.47  | -0.3193  | 0.100373 | -3.18113 | 0.001467 | 0.004445 | 2562.442 | 2541.633 | 2523.418 | 2071.414 | 1863.165 | 2168.746 |
| 17868 | MCRIIP2   | 609.2229 | -0.31932 | 0.23362  | -1.36683 | 0.171679 | 0.255455 | 787.6515 | 413.8433 | 830.0075 | 564.7281 | 447.0741 | 612.0325 |
| 22765 | LOC103230 | 33.2498  | -0.31945 | 0.533175 | -0.59915 | 0.549075 | 0.64121  | 27.10432 | 39.96106 | 43.13534 | 51.33892 | 12.83466 | 25.12449 |
| 10603 | PHACTR1   | 1085.976 | -0.31977 | 0.117511 | -2.72117 | 0.006505 | 0.01631  | 1158.981 | 1313.788 | 1147.261 | 924.1006 | 964.7389 | 1006.989 |
| 20059 | LOC103231 | 83.12695 | -0.31987 | 0.313846 | -1.0192  | 0.308106 | 0.40832  | 94.32303 | 105.1031 | 79.31338 | 53.57105 | 77.00798 | 89.44317 |
| 12319 | PCNX2     | 514.6651 | -0.3201  | 0.136665 | -2.34222 | 0.019169 | 0.041368 | 594.1267 | 555.0756 | 567.7168 | 457.586  | 432.1004 | 481.3852 |
| 10229 | LOC103241 | 1172.077 | -0.32014 | 0.114005 | -2.80809 | 0.004984 | 0.012952 | 1346     | 1349.37  | 1205.007 | 1066.957 | 1080.251 | 984.8799 |
| 9560  | SEMA7A    | 13280.02 | -0.32014 | 0.107823 | -2.96916 | 0.002986 | 0.008304 | 15772.55 | 13512.31 | 14966.57 | 11477.6  | 10759.73 | 13191.36 |
| 10977 | FN1       | 413248.2 | -0.32022 | 0.121563 | -2.63417 | 0.008434 | 0.020427 | 410477   | 544471.1 | 421825.4 | 357553.3 | 345977.6 | 399184.9 |
| 11070 | SIRT7     | 1153.388 | -0.3203  | 0.122651 | -2.61145 | 0.009016 | 0.021652 | 1315.644 | 1204.853 | 1329.543 | 964.2789 | 958.3216 | 1147.687 |
| 9193  | EDRF1     | 1329.36  | -0.32036 | 0.104822 | -3.0562  | 0.002242 | 0.006482 | 1516.216 | 1493.339 | 1421.379 | 1200.884 | 1127.311 | 1217.03  |
| 8641  | FLII      | 8532.547 | -0.32037 | 0.099584 | -3.21708 | 0.001295 | 0.003984 | 9776.528 | 9098.532 | 9562.132 | 7520.036 | 6883.658 | 8354.394 |
| 22067 | LOC119626 | 51.06523 | -0.32042 | 0.448601 | -0.71427 | 0.475059 | 0.572323 | 42.28274 | 84.84883 | 41.74388 | 40.17829 | 64.17332 | 33.16432 |
| 20712 | LOC119618 | 58.69265 | -0.32059 | 0.349294 | -0.91783 | 0.358705 | 0.460418 | 59.08741 | 65.14201 | 70.9646  | 42.41041 | 66.31243 | 48.23901 |
| 25254 | LOC119627 | 2.394361 | -0.32085 | 1.548826 | -0.20716 | 0.835885 | 0.87994  | 2.168345 | 1.642235 | 4.174388 | 2.232127 | 2.139111 | 2.009959 |
| 27560 | LOC119628 | 0.528887 | -0.32086 | 3.970519 | -0.08081 | 0.935593 | NA       | 2.168345 | 0        | 0        | 0        | 0        | 1.004979 |
| 28126 | LOC119616 | 0.528887 | -0.32086 | 3.970519 | -0.08081 | 0.935593 | NA       | 2.168345 | 0        | 0        | 0        | 0        | 1.004979 |
| 10253 | GPANK1    | 1202.755 | -0.32101 | 0.114616 | -2.80079 | 0.005098 | 0.013218 | 1321.064 | 1438.051 | 1252.316 | 1040.171 | 1035.33  | 1129.597 |
| 23890 | LOC103238 | 14.26719 | -0.32119 | 0.757439 | -0.42405 | 0.671532 | 0.747287 | 24.39389 | 6.568942 | 16.00182 | 15.62489 | 14.97377 | 8.039836 |
| 11503 | DHODH     | 620.1785 | -0.32124 | 0.127707 | -2.51545 | 0.011888 | 0.027475 | 678.6921 | 721.4888 | 665.1192 | 549.1032 | 569.0034 | 537.664  |
| 10916 | SKIL      | 3128.689 | -0.32134 | 0.121353 | -2.64801 | 0.008097 | 0.019719 | 3259.565 | 4025.666 | 3145.402 | 2765.605 | 2601.159 | 2974.739 |
| 9245  | NPNT      | 22724.34 | -0.32161 | 0.105666 | -3.04361 | 0.002338 | 0.006722 | 23998.16 | 28586.94 | 23159.51 | 19857    | 19284.08 | 21460.33 |
| 12431 | CEP131    | 801.2775 | -0.32166 | 0.138928 | -2.31533 | 0.020595 | 0.044041 | 926.9677 | 832.066  | 917.6697 | 712.0485 | 613.9248 | 804.9886 |
| 21463 | LOC103242 | 53.97016 | -0.32167 | 0.397815 | -0.80858 | 0.418755 | 0.518688 | 61.25576 | 56.38342 | 59.8329  | 64.73168 | 53.47777 | 28.13943 |
| 10640 | PDAP1     | 6145.2   | -0.32169 | 0.118774 | -2.70842 | 0.00676  | 0.016892 | 6156.475 | 8017.941 | 6310.979 | 5330.319 | 5304.994 | 5750.493 |
| 10997 | NKRF      | 830.7121 | -0.32184 | 0.122366 | -2.63014 | 0.008535 | 0.020634 | 948.1091 | 973.2982 | 848.0965 | 743.2983 | 718.7412 | 752.7296 |
| 11283 | FUBP3     | 2627.473 | -0.32185 | 0.125654 | -2.56144 | 0.010424 | 0.024561 | 2698.506 | 3427.345 | 2635.43  | 2220.966 | 2295.266 | 2487.324 |
| 8494  | ZNF473    | 2173.135 | -0.32198 | 0.098848 | -3.25732 | 0.001125 | 0.00352  | 2479.503 | 2444.741 | 2325.134 | 1883.915 | 1850.331 | 2055.183 |
| 22150 | LOC103233 | 43.5956  | -0.32202 | 0.460349 | -0.69952 | 0.484228 | 0.581182 | 59.08741 | 29.56024 | 56.35424 | 26.78552 | 55.61688 | 34.1693  |
| 8047  | UBE2Z     | 5145.759 | -0.32205 | 0.094708 | -3.40041 | 0.000673 | 0.002223 | 5510.308 | 6129.917 | 5517.846 | 4542.378 | 4355.229 | 4818.877 |
| 8315  | PE51      | 4808.307 | -0.3221  | 0.097336 | -3.30922 | 0.000936 | 0.002991 | 5297.81  | 5609.329 | 5128.932 | 4178.542 | 4002.276 | 4632.955 |
| 20874 | LOC103235 | 68.27177 | -0.32215 | 0.35995  | -0.89498 | 0.3708   | 0.47227  | 64.50828 | 104.0082 | 58.44144 | 55.80317 | 70.59065 | 56.27885 |
| 7664  | OTUB1     | 3535.455 | -0.32218 | 0.091934 | -3.50447 | 0.000458 | 0.001587 | 4105.22  | 3710.357 | 3971.93  | 3189.709 | 3039.676 | 3195.835 |
| 9823  | RXYLT1    | 1296.509 | -0.32235 | 0.11115  | -2.90013 | 0.00373  | 0.010095 | 1480.438 | 1475.822 | 1371.287 | 1093.742 | 1116.616 | 1241.15  |
| 12076 | LOC103244 | 545.9397 | -0.32244 | 0.134763 | -2.39267 | 0.016726 | 0.036824 | 613.6418 | 609.2693 | 599.7204 | 495.5322 | 444.935  | 512.5395 |
| 10599 | NRDC      | 8051.367 | -0.32256 | 0.118473 | -2.72261 | 0.006477 | 0.016246 | 8196.888 | 10482.94 | 8167.191 | 6819.148 | 6999.17  | 7642.869 |
| 9315  | TMEM245   | 4383.427 | -0.32276 | 0.106546 | -3.02932 | 0.002451 | 0.006995 | 4670.616 | 5301.136 | 4650.268 | 3843.723 | 3578.732 | 4256.088 |
| 9606  | SUPT5H    | 7078.045 | -0.32323 | 0.109195 | -2.96015 | 0.003075 | 0.00851  | 7651.549 | 8644.727 | 7314.224 | 6107.099 | 5784.155 | 6966.518 |
| 6294  | GABB1A    | 9741.28  | -0.32327 | 0.080232 | -4.02922 | 5.60E-05 | 0.000236 | 10730.06 | 11087.28 | 10669.04 | 8366.012 | 8823.832 | 8771.461 |
| 15787 | GABBR1    | 298.56   | -0.32328 | 0.189716 | -1.70402 | 0.088378 | 0.148827 | 300.3158 | 391.3994 | 302.6431 | 296.8729 | 243.8586 | 256.2698 |
| 9122  | MTERF3    | 1390.103 | -0.3233  | 0.105115 | -3.07567 | 0.0021   | 0.006121 | 1593.734 | 1534.943 | 1510.433 | 1158.474 | 1255.658 | 1287.379 |
| 11327 | PGAP4     | 1037.034 | -0.3234  | 0.126752 | -2.55143 | 0.010728 | 0.025177 | 1257.64  | 1086.612 | 1119.432 | 899.5472 | 844.9487 | 1014.024 |
| 18569 | LOC119627 | 129.1185 | -0.32344 | 0.260796 | -1.24022 | 0.214894 | 0.307662 | 166.4205 | 134.6633 | 132.189  | 91.51721 | 111.2338 | 138.6872 |
| 24424 | LOC103227 | 7.258876 | -0.32371 | 0.948086 | -0.34143 | 0.732779 | 0.797614 | 7.589209 | 7.116354 | 9.740239 | 8.928508 | 2.139111 | 8.039836 |
| 21712 | ARHGAP9   | 53.16777 | -0.32371 | 0.417103 | -0.7761  | 0.437689 | 0.535923 | 49.87195 | 56.38342 | 68.87741 | 53.57105 | 64.17332 | 26.12947 |
| 10201 | CSTF1     | 1601.566 | -0.32385 | 0.115005 | -2.81592 | 0.004864 | 0.012676 | 1760.697 | 1976.704 | 1603.661 | 1419.633 | 1424.648 | 1424.056 |
| 10989 | TEX2      | 2627.595 | -0.32392 | 0.12308  | -2.63177 | 0.008494 | 0.020549 | 2683.87  | 3395.048 | 2689.002 | 2261.145 | 2231.092 | 2505.414 |
| 20006 | LOC119628 | 93.46723 | -0.32393 | 0.314869 | -1.02878 | 0.303583 | 0.403417 | 125.764  | 82.65918 | 100.881  | 98.21359 | 91.98176 | 61.30375 |
| 12234 | ACTR3B    | 584.9644 | -0.32404 | 0.137304 | -2.36002 | 0.018274 | 0.039711 | 684.6551 | 654.1571 | 612.9393 | 470.9788 | 560.447  | 526.6092 |
| 8550  | HERC4     | 3370.161 | -0.32405 | 0.099996 | -3.24066 | 0.001193 | 0.003708 | 3982.166 | 3568.578 | 3695.725 | 2765.605 | 3048.233 | 3160.66  |
| 8770  | MIEF1     | 2700.792 | -0.32416 | 0.101881 | -3.18176 | 0.001464 | 0.004437 | 3006.953 | 3082.476 | 2927.638 | 2236.591 | 2323.074 | 2628.021 |
| 11392 | PSME3IP1  | 1484.108 | -0.32418 | 0.127698 | -2.53869 | 0.011127 | 0.025966 | 1479.354 | 1920.321 | 1551.481 | 1310.259 | 1300.579 | 1342.653 |
| 22903 | LOC119628 | 21.43532 | -0.3242  | 0.559944 | -0.57899 | 0.562595 | 0.653041 | 23.30971 | 29.56024 | 18.08902 | 22.32127 | 19.252   | 16.07967 |
| 18854 | LOC119629 | 104.8661 | -0.32426 | 0.267624 | -1.21161 | 0.225661 | 0.318192 | 115.4644 | 122.0728 | 109.9256 | 102.6778 | 102.6773 | 76.37844 |
| 12855 | LRRN4     | 451.8673 | -0.32427 | 0.145563 | -2.22772 | 0.025899 | 0.053561 | 492.2144 | 540.8429 | 473.0973 | 419.6399 | 391.4573 | 393.952  |
| 13509 | LOC119627 | 411.1368 | -0.32441 | 0.154066 | -2.10563 | 0.035236 | 0.069343 | 474.3256 | 420.9597 | 474.4888 | 401.7829 | 346.5359 | 348.7279 |
| 9904  | CEP20     | 2425.059 | -0.32447 | 0.112495 | -2.88429 | 0.003923 | 0.01053  | 2484.382 | 3049.084 | 2554.03  | 2162.931 | 2207.562 | 2092.367 |
| 10714 | PLPP1     | 1601.38  | -0.32462 | 0.120727 | -2.68885 | 0.00717  | 0.017791 | 1683.178 | 2024.876 | 1634.969 | 1352.669 | 1467.43  | 1445.16  |
| 8515  | CYB5R3    | 6177.116 | -0.3249  | 0.099875 | -3.25306 | 0.001142 | 0.003565 | 6419.929 | 7261.965 | 6932.267 | 5653.978 | 4994.823 | 5799.737 |
| 9196  | RANBP3    | 2137.218 | -0.32501 | 0.106368 |          |          |          |          |          |          |          |          |          |



|       |           |          |          |          |          |           |          |          |          |          |          |          |          |
|-------|-----------|----------|----------|----------|----------|-----------|----------|----------|----------|----------|----------|----------|----------|
| 12384 | LOC103215 | 576.0259 | -0.32537 | 0.139887 | -2.32594 | 0.020022  | 0.042981 | 697.6652 | 616.9331 | 610.8521 | 495.5322 | 483.439  | 551.7337 |
| 9641  | POT1      | 1121.665 | -0.32543 | 0.110324 | -2.94979 | 0.00318   | 0.008768 | 1251.677 | 1194.453 | 1293.365 | 1022.314 | 1022.495 | 945.6857 |
| 11714 | WDR62     | 623.0552 | -0.32545 | 0.131829 | -2.46869 | 0.013561  | 0.030777 | 735.0691 | 637.7348 | 706.8631 | 546.8711 | 554.0297 | 557.7636 |
| 11667 | TRAF6     | 1282.411 | -0.32569 | 0.131432 | -2.47805 | 0.01321   | 0.030096 | 1389.909 | 1600.632 | 1291.277 | 1207.581 | 1001.104 | 1203.965 |
| 10303 | DOCK1     | 6835.854 | -0.32592 | 0.116923 | -2.78751 | 0.005312  | 0.013704 | 7156.082 | 8844.533 | 6816.776 | 6017.814 | 5752.069 | 6427.849 |
| 13216 | GORAB     | 681.5781 | -0.32597 | 0.150542 | -2.16531 | 0.030364  | 0.06108  | 731.8166 | 731.3422 | 805.6569 | 609.3707 | 703.7674 | 507.5146 |
| 14727 | TMEM59L   | 541.3494 | -0.32598 | 0.173015 | -1.88412 | 0.059548  | 0.107496 | 717.7224 | 482.2698 | 608.0692 | 446.4254 | 494.1346 | 499.4748 |
| 12724 | RUNX1     | 1649.821 | -0.32618 | 0.144806 | -2.25256 | 0.024287  | 0.050744 | 1602.407 | 2244.936 | 1660.015 | 1357.133 | 1538.021 | 1496.414 |
| 11930 | TASP1     | 609.0068 | -0.32622 | 0.134865 | -2.4189  | 0.015568  | 0.034691 | 737.2375 | 659.0838 | 637.9857 | 515.6213 | 543.3341 | 560.7785 |
| 11891 | DLG1      | 4885.783 | -0.32623 | 0.13439  | -2.42747 | 0.015204  | 0.033993 | 4839.747 | 6682.256 | 4786.632 | 4160.685 | 4370.203 | 4475.174 |
| 11631 | ORC5      | 578.0224 | -0.32627 | 0.13119  | -2.48701 | 0.012882  | 0.029443 | 614.1839 | 671.1269 | 642.1601 | 517.8535 | 528.3603 | 494.4499 |
| 20668 | LOC119618 | 72.97644 | -0.32629 | 0.352184 | -0.92646 | 0.354205  | 0.455609 | 95.94929 | 52.55153 | 95.3152  | 60.26743 | 68.45154 | 65.32367 |
| 11366 | CAPRIN2   | 1916.154 | -0.32629 | 0.128199 | -2.54518 | 0.010922  | 0.025544 | 1984.578 | 2431.056 | 1986.313 | 1618.292 | 1572.246 | 1904.436 |
| 20197 | LOC103245 | 64.58829 | -0.32649 | 0.327477 | -0.997   | 0.318767  | 0.419588 | 79.6867  | 64.04718 | 72.35606 | 49.10679 | 62.03421 | 60.29877 |
| 21770 | LOC119618 | 40.37609 | -0.3265  | 0.426897 | -0.76481 | 0.444382  | 0.542668 | 50.41403 | 31.74989 | 52.87558 | 37.94616 | 32.08666 | 37.18424 |
| 14338 | HNRNPA2F1 | 14263.01 | -0.3265  | 0.167039 | -1.95463 | 0.050627  | 0.093871 | 13118.49 | 21475.51 | 13017.83 | 11874.92 | 12650.7  | 13440.6  |
| 14964 | LOC119627 | 1001.511 | -0.32657 | 0.177374 | -1.84114 | 0.065601  | 0.116546 | 927.5098 | 1467.064 | 949.6733 | 837.0476 | 894.1483 | 933.6259 |
| 7629  | VMA21     | 6449.402 | -0.32708 | 0.09303  | -3.51582 | 0.000438  | 0.001528 | 7014.598 | 7740.95  | 6777.119 | 5495.497 | 5899.667 | 5768.582 |
| 16643 | LIME1     | 370.2038 | -0.32712 | 0.21103  | -1.55009 | 0.121121  | 0.193475 | 450.4738 | 299.9817 | 488.4034 | 325.8905 | 286.6408 | 369.8324 |
| 22533 | LOC119624 | 31.22341 | -0.3272  | 0.514696 | -0.63571 | 0.524964  | 0.619338 | 32.52518 | 33.39212 | 36.87376 | 24.5534  | 44.92132 | 15.07469 |
| 14466 | FAM171A2  | 666.6947 | -0.32722 | 0.169426 | -1.93132 | 0.053443  | 0.098216 | 766.5101 | 635.5451 | 828.6161 | 620.5313 | 470.6043 | 678.3611 |
| 13070 | CAND2     | 674.834  | -0.32722 | 0.149188 | -2.19336 | 0.028281  | 0.057526 | 797.409  | 739.5534 | 722.1692 | 593.7458 | 502.691  | 693.4358 |
| 11671 | LOC103240 | 6381.637 | -0.3275  | 0.132211 | -2.47712 | 0.013245  | 0.03017  | 6233.993 | 8714.249 | 6361.768 | 5542.371 | 5572.383 | 5865.06  |
| 7095  | HSD17B12  | 5492.295 | -0.32753 | 0.088557 | -3.69857 | 0.000217  | 0.000812 | 5977.586 | 6503.8   | 5859.45  | 4781.216 | 4877.172 | 4954.549 |
| 19266 | LOC119624 | 103.5647 | -0.32767 | 0.287057 | -1.14147 | 0.253675  | 0.350044 | 118.1748 | 94.70224 | 130.7975 | 102.6778 | 102.6773 | 72.35852 |
| 9449  | SMG5      | 5926.777 | -0.32789 | 0.109377 | -2.99777 | 0.00272   | 0.007652 | 6895.881 | 6306.732 | 6599.708 | 5062.464 | 4725.295 | 5970.583 |
| 19230 | LOC103244 | 92.67564 | -0.32791 | 0.285412 | -1.14889 | 0.250603  | 0.346452 | 114.9223 | 91.96518 | 100.881  | 84.82083 | 94.12087 | 69.34358 |
| 9702  | SNRPA1    | 1778.732 | -0.32794 | 0.11198  | -2.92853 | 0.003406  | 0.009332 | 1791.595 | 2086.186 | 2058.669 | 1573.65  | 1674.924 | 1487.37  |
| 11321 | GYPC      | 901.35   | -0.328   | 0.128506 | -2.55238 | 0.010699  | 0.025124 | 939.4357 | 1129.311 | 942.0203 | 805.7978 | 776.4972 | 815.0383 |
| 24575 | LOC103227 | 6.019747 | -0.32819 | 1.026104 | -0.31984 | 0.749091  | 0.810359 | 7.047123 | 6.02153  | 6.957314 | 8.928508 | 2.139111 | 5.024897 |
| 12509 | LOC103245 | 419.7955 | -0.32823 | 0.142711 | -2.29994 | 0.021451  | 0.04559  | 469.9889 | 475.7009 | 456.3998 | 372.7652 | 370.0661 | 373.8524 |
| 27963 | LOC119627 | 0.530663 | -0.3283  | 3.483744 | -0.09424 | 0.92492   | NA       | 1.084173 | 1.094824 | 0        | 0        | 0        | 1.004979 |
| 20868 | LOC103237 | 50.51069 | -0.32875 | 0.367097 | -0.89554 | 0.370497  | 0.471942 | 56.37698 | 51.45671 | 59.8329  | 46.87467 | 51.33866 | 37.18424 |
| 7014  | PTGES3    | 6962.2   | -0.32894 | 0.088224 | -3.72847 | 0.000193  | 0.00073  | 7484.044 | 8270.298 | 7502.071 | 6046.832 | 6344.602 | 6125.35  |
| 17486 | ODF2L     | 193.2283 | -0.32916 | 0.232926 | -1.41314 | 0.157613  | 0.23947  | 213.0399 | 262.2103 | 170.4542 | 149.5525 | 188.2417 | 175.8714 |
| 17689 | LOC119623 | 130.3424 | -0.32946 | 0.237541 | -1.38695 | 0.165458  | 0.248669 | 132.8112 | 158.202  | 145.4079 | 116.0706 | 106.9555 | 122.6075 |
| 22138 | LOC103246 | 31.89425 | -0.32946 | 0.469568 | -0.70163 | 0.48291   | 0.579915 | 36.31979 | 37.224   | 32.00364 | 40.17829 | 23.53022 | 22.10955 |
| 14350 | ANKS3     | 586.0385 | -0.32958 | 0.168794 | -1.95253 | 0.050875  | 0.094251 | 748.6213 | 539.748  | 674.1637 | 493.3001 | 468.4652 | 591.9329 |
| 13986 | SLC9A5    | 457.5552 | -0.32958 | 0.163719 | -2.01307 | 0.044107  | 0.08384  | 591.4162 | 445.5932 | 491.8821 | 379.4616 | 429.9612 | 407.0167 |
| 7548  | PELO      | 3674.931 | -0.32963 | 0.093039 | -3.54292 | 0.000396  | 0.001394 | 4286.819 | 3862.538 | 4133.34  | 3252.209 | 3135.936 | 3378.741 |
| 15048 | TEPSIN    | 571.2916 | -0.32964 | 0.180702 | -1.8242  | 0.068121  | 0.120348 | 704.1702 | 511.83   | 697.8186 | 493.3001 | 425.683  | 594.9478 |
| 22049 | LOC103237 | 32.93349 | -0.32972 | 0.460371 | -0.71619 | 0.473871  | 0.571349 | 31.44101 | 42.69812 | 36.87376 | 29.01765 | 21.39111 | 36.17926 |
| 23522 | LOC119627 | 14.64358 | -0.32987 | 0.687584 | -0.47976 | 0.6314    | 0.71362  | 19.51511 | 11.49565 | 17.39328 | 11.16063 | 19.252   | 9.044815 |
| 19335 | SPATA1    | 87.56378 | -0.32993 | 0.292167 | -1.12924 | 0.258796  | 0.355836 | 94.86511 | 91.41777 | 104.3597 | 82.5887  | 89.84265 | 62.30873 |
| 12361 | ZNRD2     | 747.5872 | -0.33006 | 0.141687 | -2.32948 | 0.019834  | 0.042657 | 873.8432 | 707.8035 | 916.2782 | 680.7987 | 654.5679 | 652.2317 |
| 10198 | ABCB6     | 1595.111 | -0.33022 | 0.117237 | -2.81667 | 0.004852  | 0.01265  | 1879.413 | 1642.235 | 1815.859 | 1290.169 | 1388.283 | 1554.703 |
| 7743  | AXIN1     | 2043.679 | -0.33027 | 0.094901 | -3.4802  | 0.000501  | 0.00172  | 2282.184 | 2266.832 | 2284.782 | 1810.255 | 1732.68  | 1885.341 |
| 22541 | LOC119623 | 24.9815  | -0.33036 | 0.520807 | -0.63432 | 0.52587   | 0.620214 | 27.10432 | 26.82318 | 28.52499 | 24.5534  | 27.80844 | 15.07469 |
| 9410  | DIS3L     | 1694.023 | -0.33053 | 0.10999  | -3.00508 | 0.002655  | 0.007501 | 1799.727 | 2027.613 | 1838.818 | 1383.919 | 1525.186 | 1588.873 |
| 11027 | MLU       | 1638.616 | -0.33061 | 0.126002 | -2.62386 | 0.008694  | 0.02096  | 1673.963 | 2120.673 | 1682.278 | 1491.061 | 1390.442 | 1473.3   |
| 13272 | SC16A3    | 5003.349 | -0.33069 | 0.153567 | -2.1534  | 0.031287  | 0.062671 | 6391.74  | 4236.967 | 6099.477 | 4341.487 | 3929.546 | 5020.877 |
| 10679 | UBE2I     | 4037.697 | -0.33078 | 0.122634 | -2.69726 | 0.006991  | 0.017404 | 4291.698 | 5272.123 | 3932.274 | 3379.44  | 3715.635 | 3635.011 |
| 19316 | FOXA1     | 112.2438 | -0.33083 | 0.292197 | -1.13222 | 0.257543  | 0.354432 | 102.9964 | 141.2322 | 133.5804 | 100.4457 | 70.59065 | 124.6175 |
| 11088 | PCNX3     | 3001.193 | -0.33085 | 0.126845 | -2.60826 | 0.0091    | 0.021819 | 3568.012 | 2889.787 | 3581.625 | 2482.125 | 2470.673 | 3014.938 |
| 10535 | BHLA57    | 2150.797 | -0.33086 | 0.120839 | -2.73803 | 0.006181  | 0.015597 | 2246.948 | 2738.701 | 2207.556 | 1796.862 | 1869.583 | 2045.133 |
| 11594 | BOLA2B    | 742.3073 | -0.33111 | 0.132648 | -2.49617 | 0.012554  | 0.028787 | 818.0083 | 838.6349 | 818.1801 | 716.5128 | 686.6545 | 575.8532 |
| 10299 | ARPC5L    | 832.1928 | -0.33113 | 0.118717 | -2.78927 | 0.005283  | 0.013636 | 951.3616 | 868.1951 | 962.8922 | 729.9055 | 740.1323 | 740.6699 |
| 21709 | LOC119627 | 42.25906 | -0.33115 | 0.426463 | -0.7765  | 0.437455  | 0.53571  | 59.6295  | 34.48694 | 47.30973 | 29.01765 | 44.92132 | 38.18922 |
| 9242  | NGRN      | 4658.21  | -0.33129 | 0.108831 | -3.04408 | 0.002334  | 0.006714 | 4897.208 | 5864.97  | 4812.374 | 4185.238 | 3893.181 | 4296.287 |
| 10882 | GMCL1     | 1191.438 | -0.33131 | 0.12486  | -2.65343 | 0.007968  | 0.019466 | 1228.91  | 1512.499 | 1241.185 | 1069.189 | 1039.608 | 1057.238 |
| 10246 | ACP6      | 1242.38  | -0.3316  | 0.118274 | -2.80361 | 0.005053  | 0.013112 | 1374.189 | 1417.797 | 1369.199 | 1051.332 | 1009.66  | 1232.105 |
| 9942  | ACTR6     | 1298.664 | -0.33198 | 0.115412 | -2.87648 | 0.004021  | 0.010753 | 1566.088 | 1338.422 | 1438.077 | 1084.814 | 1212.876 | 1151.706 |
| 24400 | LOC103236 | 9.978306 | -0.33199 | 0.95793  | -0.34657 | 0.728915  | 0.794156 | 16.26259 | 1.642235 | 15.30609 | 8.928508 | 10.69555 | 7.034856 |
| 21382 | LOC103217 | 63.43544 | -0.332   | 0.40518  | -0.8194  | 0.412561  | 0.512952 | 59.08741 | 108.3875 | 44.52681 | 53.57105 | 57.75599 | 57.28383 |
| 21818 | TRPV4     | 39.4411  | -0.33216 | 0.438651 | -0.75724 | 0.448907  | 0.546946 | 58.00324 | 33.39212 | 39.65669 | 37.94616 | 38.50399 | 29.1444  |
| 14860 | ADGRF3    | 307.6802 | -0.33243 | 0.178671 | -1.86057 | 0.062805  | 0.11236  | 347.4774 | 319.6885 | 358.3017 | 267.8552 | 316.5884 | 236.1702 |
| 23242 | LOC103247 | 24.0173  | -0.33248 | 0.635743 | -0.52298 | 0.600989  | 0.687432 | 41.19856 | 9.306001 | 29.91645 | 22.32127 | 19.252   | 22.10955 |
| 23182 | LOC119620 | 17.47107 | -0.33261 | 0.624206 | -0.53286 | 0.594131  | 0.681347 | 20.0572  | 18.06459 | 20.17621 | 8.928508 | 23.53022 | 14.06971 |
| 11020 | CRY1      | 863.1552 | -0.33285 | 0.126823 | -2.62454 | 0.008677  | 0.02093  | 1000.149 | 974.9404 | 917.6697 | 703.12   | 735.8541 | 847.1977 |
| 18230 | KRT28     | 102.4301 | -0.33291 | 0.257    | -1.29537 | 0.195193  | 0.284652 | 116.0065 | 114.4091 | 112.7085 | 89.28508 | 87.70354 | 94.46807 |
| 6615  | LOC103245 | 4564.992 | -0.333   | 0.085466 | -3.89633 | 0.977E-05 |          |          |          |          |          |          |          |



|       |           |          |          |          |          |          |          |          |          |          |          |          |          |
|-------|-----------|----------|----------|----------|----------|----------|----------|----------|----------|----------|----------|----------|----------|
| 9530  | METTL15   | 1112.05  | -0.33325 | 0.111963 | -2.97641 | 0.002916 | 0.008134 | 1291.792 | 1155.586 | 1273.188 | 957.5825 | 1003.243 | 990.9098 |
| 22809 | LOC119621 | 32.36511 | -0.3333  | 0.564408 | -0.59053 | 0.554833 | 0.646685 | 18.43094 | 64.04718 | 25.74206 | 29.01765 | 27.80844 | 29.1444  |
| 8598  | WWP2      | 1828.131 | -0.33331 | 0.103191 | -3.22999 | 0.001238 | 0.003828 | 2094.622 | 2044.036 | 1982.834 | 1562.489 | 1540.16  | 1744.644 |
| 20409 | LOC119618 | 64.67062 | -0.33331 | 0.347257 | -0.95983 | 0.33714  | 0.439163 | 78.60252 | 79.92212 | 56.35424 | 71.42806 | 53.47777 | 48.23901 |
| 8385  | GATAD1    | 1815.826 | -0.3334  | 0.101418 | -3.28739 | 0.001011 | 0.003206 | 2116.305 | 1965.208 | 1997.445 | 1531.239 | 1589.359 | 1695.4   |
| 9541  | SMARCAL1  | 2214.382 | -0.33341 | 0.112102 | -2.97418 | 0.002938 | 0.008186 | 2528.833 | 2392.19  | 2495.588 | 1868.29  | 1790.436 | 2210.955 |
| 22111 | LOC103225 | 32.21204 | -0.33355 | 0.472001 | -0.70667 | 0.47977  | 0.576863 | 44.45108 | 28.46541 | 34.09084 | 26.78552 | 36.36488 | 23.11453 |
| 9362  | LOC103225 | 1057.995 | -0.33358 | 0.11062  | -3.01552 | 0.002565 | 0.007283 | 1184.459 | 1226.75  | 1129.868 | 901.7793 | 943.3478 | 961.7654 |
| 12942 | LOC119621 | 569.316  | -0.33361 | 0.150616 | -2.21497 | 0.026762 | 0.054973 | 709.5911 | 570.9505 | 627.5497 | 453.1218 | 506.9692 | 547.7138 |
| 9658  | TEAD1     | 10155.78 | -0.33363 | 0.113313 | -2.94431 | 0.003237 | 0.008909 | 10610.8  | 12914.54 | 10455.45 | 8526.725 | 8586.39  | 9840.759 |
| 26683 | SPUNK7    | 0.532438 | -0.33391 | 3.969877 | -0.08411 | 0.932969 | NA       | 0        | 2.189647 | 0        | 0        | 0        | 1.004979 |
| 9292  | FINDC2    | 3780.565 | -0.33395 | 0.110061 | -3.03421 | 0.002412 | 0.0069   | 4093.294 | 3998.843 | 4548.692 | 3462.029 | 3610.819 | 2969.714 |
| 9459  | FARSA     | 1918.538 | -0.33407 | 0.111539 | -2.99513 | 0.002743 | 0.00771  | 2214.965 | 2150.234 | 2062.148 | 1569.185 | 1619.307 | 1895.391 |
| 8136  | NEK9      | 6168.007 | -0.33425 | 0.099225 | -3.36865 | 0.000755 | 0.002468 | 7072.059 | 6904.505 | 6671.368 | 5160.678 | 5142.422 | 6057.011 |
| 10328 | STK16     | 3228.154 | -0.33426 | 0.120141 | -2.78221 | 0.005399 | 0.013898 | 3881.338 | 3035.399 | 3887.747 | 2861.587 | 2723.088 | 2979.764 |
| 9144  | INPP5B    | 1475.115 | -0.33445 | 0.109021 | -3.06779 | 0.002156 | 0.00627  | 1686.431 | 1652.636 | 1600.878 | 1345.973 | 1182.928 | 1381.847 |
| 16900 | LOC103236 | 159.2338 | -0.33456 | 0.222067 | -1.50658 | 0.131917 | 0.207516 | 176.7202 | 182.8355 | 170.4542 | 151.7846 | 154.016  | 119.5926 |
| 22411 | TRNAF-GA  | 29.267   | -0.33467 | 0.511242 | -0.65461 | 0.512718 | 0.608191 | 31.44101 | 21.89647 | 45.22254 | 20.08914 | 27.80844 | 29.1444  |
| 22042 | LOC103215 | 29.63314 | -0.33478 | 0.466252 | -0.71802 | 0.472745 | 0.570155 | 36.86187 | 29.56024 | 32.69937 | 29.01765 | 23.53022 | 26.12947 |
| 11760 | PWWP2A    | 1854.248 | -0.33485 | 0.136367 | -2.45547 | 0.01407  | 0.031803 | 1920.612 | 2489.629 | 1795.683 | 1660.702 | 1576.525 | 1682.336 |
| 10101 | MRPS30    | 4748.486 | -0.33487 | 0.117964 | -2.83876 | 0.004529 | 0.01192  | 4872.814 | 6208.197 | 4808.2   | 4334.791 | 4160.57  | 4106.346 |
| 16714 | LOC119621 | 222.5861 | -0.33488 | 0.217511 | -1.53961 | 0.123655 | 0.196683 | 203.8245 | 300.5291 | 239.3316 | 189.7308 | 218.1893 | 183.9112 |
| 8969  | TUBA1C    | 23453.43 | -0.33502 | 0.107157 | -3.12639 | 0.00177  | 0.005246 | 24547.84 | 30170.6  | 23773.84 | 20863.69 | 20650.97 | 20713.63 |
| 10655 | SEM1      | 5258.41  | -0.33506 | 0.123995 | -2.7022  | 0.006888 | 0.017186 | 5160.662 | 6970.195 | 5464.97  | 4683.002 | 4838.668 | 4432.964 |
| 15154 | SRRM1     | 4035.919 | -0.3351  | 0.185639 | -1.8051  | 0.071059 | 0.124661 | 3512.72  | 6350.524 | 3644.241 | 3453.1   | 3645.045 | 3609.886 |
| 8769  | LOC103245 | 2086.105 | -0.33513 | 0.105316 | -3.18208 | 0.001462 | 0.004433 | 2430.715 | 2248.22  | 2299.392 | 2024.539 | 1736.958 | 1776.804 |
| 15723 | AVIL      | 235.4978 | -0.33536 | 0.195725 | -1.71344 | 0.086632 | 0.146471 | 275.922  | 252.9043 | 258.1163 | 180.8023 | 250.2759 | 194.966  |
| 11747 | LOC103234 | 742.2631 | -0.33552 | 0.136436 | -2.45916 | 0.013926 | 0.031517 | 879.8062 | 745.0275 | 863.4026 | 665.1738 | 594.6728 | 705.4956 |
| 18407 | MAPK13    | 115.0532 | -0.33553 | 0.265475 | -1.26388 | 0.206274 | 0.29792  | 134.9795 | 108.935  | 139.1463 | 111.6063 | 111.2338 | 84.41828 |
| 11811 | LINS1     | 549.2269 | -0.33564 | 0.13719  | -2.44653 | 0.014424 | 0.032466 | 664.0558 | 597.7737 | 576.7613 | 473.2109 | 494.1346 | 489.425  |
| 8410  | PIH1D1    | 2047.981 | -0.33565 | 0.102374 | -3.27864 | 0.001043 | 0.003297 | 2231.77  | 2467.185 | 2158.159 | 1772.309 | 1803.27  | 1855.192 |
| 8377  | WDR35     | 4419.059 | -0.33575 | 0.102031 | -3.29067 | 0.001    | 0.003172 | 4960.09  | 5389.817 | 4442.245 | 3814.705 | 4000.137 | 3907.36  |
| 6513  | MRPS35    | 3809.142 | -0.33592 | 0.085396 | -3.93371 | 8.36E-05 | 0.000341 | 4174.607 | 4355.756 | 4218.915 | 3435.243 | 3366.96  | 3303.368 |
| 11188 | ARP3B1    | 5602.92  | -0.33594 | 0.129977 | -2.58464 | 0.009748 | 0.023163 | 5707.627 | 5446.185 | 4924.072 | 4832.251 | 5103.286 |          |
| 8647  | RAB8B     | 2936.859 | -0.33624 | 0.104556 | -3.2159  | 0.0013   | 0.003998 | 3113.202 | 3615.655 | 3107.136 | 2566.946 | 2502.759 | 2715.455 |
| 22829 | LOC119621 | 20.09649 | -0.33629 | 0.571738 | -0.58819 | 0.556405 | 0.64781  | 20.0572  | 19.15941 | 28.52499 | 15.62489 | 17.11289 | 20.09959 |
| 10541 | GGNBP2    | 3290.113 | -0.33629 | 0.1229   | -2.73631 | 0.006213 | 0.01567  | 3411.35  | 4296.635 | 3310.29  | 2720.963 | 2941.277 | 3060.162 |
| 14434 | PLA2G4B   | 314.8067 | -0.3363  | 0.173551 | -1.93777 | 0.052651 | 0.096975 | 394.6389 | 321.3307 | 337.4297 | 299.105  | 260.9715 | 275.3644 |
| 9610  | SMARCA4   | 1404.227 | -0.33631 | 0.113671 | -2.95866 | 0.00309  | 0.008548 | 7620.65  | 9533.177 | 7639.826 | 6611.56  | 6139.248 | 6882.099 |
| 9708  | SMND1     | 7169.444 | -0.33674 | 0.115046 | -2.927   | 0.003422 | 0.009372 | 1300.465 | 1344.443 | 1271.101 | 935.2612 | 1123.033 | 1041.159 |
| 23692 | NPY1R     | 16.6028  | -0.3368  | 0.741275 | -0.45435 | 0.649579 | 0.728869 | 17.88885 | 21.89647 | 14.61036 | 13.39276 | 27.80844 | 4.019918 |
| 7964  | MKRN2     | 2873.836 | -0.33684 | 0.098466 | -3.42093 | 0.000624 | 0.002083 | 3376.114 | 3099.446 | 3154.446 | 2421.858 | 2470.673 | 2720.479 |
| 11453 | GLMN      | 776.8238 | -0.33696 | 0.133404 | -2.52585 | 0.011542 | 0.026791 | 965.4558 | 779.5144 | 856.4453 | 662.9417 | 710.1847 | 686.401  |
| 21781 | FAM83E    | 39.89055 | -0.33702 | 0.441839 | -0.76278 | 0.445597 | 0.543877 | 53.66655 | 30.65506 | 48.7012  | 31.24978 | 44.92132 | 30.14938 |
| 15753 | LOC103242 | 205.5515 | -0.33703 | 0.197316 | -1.70806 | 0.087625 | 0.147877 | 213.582  | 238.6716 | 233.7657 | 191.9629 | 192.52   | 162.8067 |
| 7207  | BFAR      | 4707.388 | -0.33712 | 0.092008 | -3.66404 | 0.000248 | 0.000916 | 5307.026 | 5370.657 | 5094.145 | 4080.328 | 3938.103 | 4454.069 |
| 7191  | CEP192    | 4136.008 | -0.33718 | 0.091903 | -3.66882 | 0.000244 | 0.000901 | 4692.842 | 4761.935 | 4401.892 | 3482.118 | 3632.21  | 3845.051 |
| 23146 | TRNAS-GCI | 16.04631 | -0.33725 | 0.627622 | -0.53734 | 0.591033 | 0.678848 | 15.7205  | 20.25424 | 18.08902 | 11.16063 | 14.97377 | 16.07967 |
| 23496 | TRNAL-CA  | 14.08604 | -0.33733 | 0.695034 | -0.48534 | 0.627436 | 0.709924 | 15.17842 | 20.80165 | 11.82743 | 8.928508 | 10.69555 | 17.08465 |
| 14303 | TARS3     | 398.5789 | -0.33734 | 0.172051 | -1.96069 | 0.049915 | 0.092778 | 404.3964 | 528.2524 | 401.437  | 343.7476 | 367.927  | 345.7129 |
| 24044 | LOC119623 | 8.784082 | -0.33736 | 0.843588 | -0.39991 | 0.689225 | 0.762063 | 9.215468 | 9.853413 | 10.43597 | 4.464254 | 10.69555 | 8.039836 |
| 8192  | FKTN      | 2304.455 | -0.33748 | 0.100787 | -3.34843 | 0.000813 | 0.002637 | 2560.274 | 2759.503 | 2397.49  | 1995.522 | 2089.911 | 2024.029 |
| 23733 | LOC103235 | 11.94103 | -0.33754 | 0.753344 | -0.44806 | 0.654112 | 0.732691 | 13.55216 | 8.758589 | 17.39328 | 8.928508 | 14.97377 | 8.039836 |
| 22378 | LOC103215 | 26.03455 | -0.33759 | 0.510205 | -0.66168 | 0.508174 | 0.60371  | 28.73058 | 25.18094 | 32.69937 | 31.24978 | 19.252   | 19.09461 |
| 9664  | ATF6      | 8932.629 | -0.33761 | 0.114767 | -2.94166 | 0.003265 | 0.008981 | 9272.387 | 11630.31 | 9019.461 | 7836.998 | 7595.982 | 8241.837 |
| 10225 | HP1BP3    | 5110.891 | -0.33774 | 0.12025  | -2.80865 | 0.004975 | 0.012934 | 5262.574 | 6733.165 | 5123.366 | 4595.949 | 4340.256 | 4608.836 |
| 12077 | ADAMTSL4  | 515.6961 | -0.33777 | 0.141188 | -2.39231 | 0.016743 | 0.036855 | 561.6015 | 592.847  | 576.7613 | 408.4792 | 462.0479 | 492.4399 |
| 9146  | KANSL1    | 3797.353 | -0.33783 | 0.110132 | -3.06752 | 0.002158 | 0.006274 | 3960.483 | 4814.487 | 3947.58  | 3299.084 | 3262.144 | 3500.343 |
| 11732 | PIBF1     | 1310.642 | -0.33797 | 0.137202 | -2.46331 | 0.013766 | 0.031194 | 1343.832 | 1723.252 | 1319.802 | 1151.778 | 1242.823 | 1082.363 |
| 10957 | SMIM11A   | 982.6337 | -0.33813 | 0.128173 | -2.63807 | 0.008338 | 0.02023  | 1078.21  | 1024.755 | 1184.135 | 964.2789 | 853.5052 | 790.9188 |
| 17717 | LOC119623 | 220.4912 | -0.33861 | 0.245055 | -1.38178 | 0.167039 | 0.250641 | 325.7939 | 184.4778 | 229.5914 | 174.1059 | 198.9373 | 210.0407 |
| 11587 | BBS5      | 1242.578 | -0.33897 | 0.135748 | -2.49703 | 0.012524 | 0.028735 | 1327.57  | 1323.094 | 1505.563 | 1241.063 | 1131.59  | 926.5911 |
| 9997  | MED8      | 910.7907 | -0.33898 | 0.11844  | -2.86199 | 0.00421  | 0.011195 | 1060.863 | 944.2854 | 1047.771 | 821.4227 | 774.3581 | 816.0433 |
| 12829 | PARS2     | 813.0492 | -0.339   | 0.151766 | -2.2337  | 0.025503 | 0.052849 | 942.6882 | 859.4365 | 926.0185 | 794.6372 | 562.5861 | 792.9288 |
| 8552  | FAM20B    | 6517.249 | -0.33909 | 0.104645 | -3.2404  | 0.001194 | 0.003711 | 7128.436 | 8086.367 | 6628.233 | 5676.299 | 5488.958 | 6095.2   |
| 9520  | TIGAR     | 1313.216 | -0.33918 | 0.113849 | -2.97925 | 0.00289  | 0.008069 | 1380.694 | 1608.843 | 1410.247 | 1133.921 | 1197.902 | 1147.687 |
| 12723 | CCDC47    | 4040.5   | -0.33948 | 0.150697 | -2.25276 | 0.024274 | 0.050722 | 3907.359 | 5804.207 | 3829.305 | 3607.117 | 3493.168 | 3601.846 |
| 22404 | PDPN      | 32.01223 | -0.3396  | 0.517608 | -0.6561  | 0.511758 | 0.607261 | 34.69353 | 31.20247 | 39.65669 | 44.64254 | 27.80844 | 14.06971 |
| 10330 | CUNH19or  | 3259.1   | -0.33991 | 0.122202 | -2.78156 | 0.00541  | 0.013923 | 3931.752 | 3023.355 | 3969.843 | 2816.944 | 2911.33  | 2901.376 |
| 22993 | TRNAS-AG  | 18.99066 | -0.34013 | 0.602247 | -0.56476 | 0.572236 | 0.661602 | 19.51511 | 20.80165 | 23.65487 | 22.32127 | 8.556443 | 19.09461 |
| 17051 | ITGAE     | 449.8229 | -0.34013 | 0.228777 | -1.48673 | 0.137087 | 0.213739 | 584.9112 | 319.1411 | 602.503  |          |          |          |



|       |           |          |          |          |          |          |          |          |          |          |          |          |          |
|-------|-----------|----------|----------|----------|----------|----------|----------|----------|----------|----------|----------|----------|----------|
| 20535 | LOC103220 | 52.4188  | -0.3405  | 0.361151 | -0.94281 | 0.345778 | 0.447515 | 55.8349  | 62.40495 | 56.35424 | 55.80317 | 44.92132 | 39.1942  |
| 23458 | LOC103220 | 14.03096 | -0.34052 | 0.692822 | -0.4915  | 0.623075 | 0.706132 | 9.757555 | 16.96977 | 20.17621 | 13.39276 | 12.83466 | 11.05477 |
| 18005 | CYB561D2  | 308.4874 | -0.34076 | 0.253952 | -1.34182 | 0.179655 | 0.265266 | 439.632  | 210.7535 | 385.4352 | 258.9267 | 256.6933 | 299.4839 |
| 20140 | LOC103247 | 70.89315 | -0.3408  | 0.339027 | -1.00524 | 0.314783 | 0.415517 | 103.5385 | 69.5213  | 64.00729 | 66.96381 | 62.03421 | 59.29379 |
| 17435 | CUNH19orf | 501.6331 | -0.34085 | 0.239957 | -1.42047 | 0.155471 | 0.237063 | 663.5137 | 333.9212 | 685.9911 | 459.8182 | 387.179  | 479.3752 |
| 7494  | POLR1F    | 2994.596 | -0.34106 | 0.095721 | -3.563   | 0.000367 | 0.001301 | 3204.273 | 3579.526 | 3258.806 | 2551.321 | 2680.306 | 2693.345 |
| 7725  | MRPL39    | 2429.22  | -0.34127 | 0.097955 | -3.48391 | 0.000494 | 0.001701 | 2726.111 | 2738.399 | 2040.164 | 2320.935 | 2071.263 |          |
| 9744  | PHTF2     | 933.3943 | -0.34131 | 0.116954 | -2.91829 | 0.00352  | 0.009602 | 1024.543 | 1116.72  | 987.9385 | 841.5119 | 808.5838 | 821.0682 |
| 11089 | ZNF106    | 5084.026 | -0.34137 | 0.130883 | -2.6082  | 0.009102 | 0.02182  | 5137.895 | 6886.441 | 5026.659 | 4339.255 | 4340.256 | 4773.652 |
| 13894 | LOC119623 | 334.0887 | -0.34155 | 0.168108 | -2.03172 | 0.042182 | 0.080711 | 404.3964 | 342.6798 | 372.2163 | 274.5516 | 327.2839 | 283.4042 |
| 9650  | TPM4      | 12359.95 | -0.34165 | 0.11595  | -2.94649 | 0.003214 | 0.008855 | 12573.15 | 16310.14 | 12565.6  | 11035.64 | 10832.46 | 10842.72 |
| 8040  | MRPS2     | 2095.791 | -0.34168 | 0.100443 | -3.40173 | 0.00067  | 0.002214 | 2336.934 | 2421.75  | 2275.042 | 1843.737 | 1730.541 | 1966.745 |
| 21897 | IRF8      | 30.14486 | -0.34174 | 0.45888  | -0.74472 | 0.456444 | 0.554165 | 32.52518 | 35.58177 | 33.39511 | 24.5534  | 25.66933 | 29.1444  |
| 24020 | LOC119623 | 8.468113 | -0.34176 | 0.846734 | -0.40362 | 0.686494 | 0.759802 | 10.29964 | 9.306001 | 9.044508 | 6.696381 | 6.417332 | 9.044815 |
| 20581 | LOC103220 | 63.51821 | -0.34182 | 0.363387 | -0.94064 | 0.34689  | 0.448086 | 81.31296 | 48.17224 | 84.1835  | 55.80317 | 51.33866 | 60.29877 |
| 10953 | PHF10     | 1319.302 | -0.34184 | 0.129546 | -2.63872 | 0.008322 | 0.020199 | 1358.468 | 1686.028 | 1383.81  | 1066.957 | 1174.372 | 1246.175 |
| 7799  | MED6      | 1585.444 | -0.34189 | 0.098655 | -3.4655  | 0.000529 | 0.001804 | 1795.932 | 1724.895 | 1794.291 | 1397.311 | 1437.482 | 1362.752 |
| 10375 | TTC14     | 2596.841 | -0.34201 | 0.123463 | -2.77014 | 0.005603 | 0.014356 | 2615.025 | 3404.901 | 2691.785 | 2229.895 | 2254.623 | 2384.816 |
| 10606 | POLE3     | 948.2244 | -0.34223 | 0.125812 | -2.72021 | 0.006524 | 0.016353 | 1052.732 | 1141.901 | 983.7642 | 917.4042 | 776.4972 | 817.0483 |
| 7541  | COPS9     | 2508.499 | -0.34227 | 0.096526 | -3.54592 | 0.000391 | 0.001379 | 2793.913 | 2688.339 | 2927.638 | 2225.431 | 2310.24  | 2105.432 |
| 6036  | MRPS10    | 4545.295 | -0.34241 | 0.08254  | -4.14847 | 3.35E-05 | 0.000147 | 5051.161 | 5185.085 | 5009.962 | 4035.686 | 3983.024 | 4006.853 |
| 13063 | PRPF38B   | 3295.592 | -0.34245 | 0.15608  | -2.19405 | 0.028232 | 0.057456 | 3234.087 | 4781.642 | 3038.955 | 2828.105 | 2939.138 | 2951.625 |
| 9388  | KNSTRN    | 1941.405 | -0.3425  | 0.113798 | -3.00968 | 0.002615 | 0.007406 | 2092.995 | 2402.59  | 2011.359 | 1767.845 | 1779.74  | 1593.897 |
| 8441  | TMEM248   | 7862.612 | -0.34256 | 0.104721 | -3.27122 | 0.001071 | 0.003373 | 8627.305 | 9622.952 | 8131.013 | 6886.112 | 6398.08  | 7510.212 |
| 7724  | LOC103230 | 3045.387 | -0.34263 | 0.098319 | -3.48485 | 0.000492 | 0.001695 | 3473.689 | 3399.427 | 3350.642 | 2627.213 | 2504.899 | 2916.45  |
| 13484 | LOC103248 | 437.2647 | -0.34269 | 0.162393 | -2.11027 | 0.034835 | 0.068681 | 517.6925 | 424.2442 | 528.0601 | 348.2118 | 389.3181 | 416.0615 |
| 19260 | FSIP1     | 93.39979 | -0.3427  | 0.299881 | -1.14278 | 0.253129 | 0.349382 | 110.0435 | 106.7453 | 94.61947 | 71.42806 | 111.2338 | 66.32864 |
| 12363 | DET1      | 467.0841 | -0.34272 | 0.147136 | -2.32927 | 0.019845 | 0.042673 | 522.5713 | 546.8644 | 500.9266 | 410.7114 | 372.2053 | 449.2258 |
| 11995 | TMEM223   | 560.335  | -0.34281 | 0.142386 | -2.40759 | 0.016058 | 0.03559  | 588.7058 | 613.1012 | 674.8594 | 544.639  | 483.439  | 457.2657 |
| 22086 | LOC103217 | 28.09981 | -0.34281 | 0.481666 | -0.71172 | 0.476638 | 0.573731 | 33.60935 | 35.03436 | 25.74206 | 24.5534  | 23.53022 | 26.12947 |
| 18421 | SRL       | 103.7408 | -0.34318 | 0.272002 | -1.2617  | 0.207058 | 0.298824 | 111.6698 | 105.1031 | 130.7975 | 80.35657 | 109.0946 | 85.42325 |
| 6103  | TWF1      | 6834.352 | -0.34319 | 0.08328  | -4.12094 | 3.77E-05 | 0.000164 | 7508.98  | 7676.903 | 7738.62  | 6169.599 | 6158.5   | 5753.507 |
| 7504  | PTPN3     | 6596.174 | -0.3432  | 0.096437 | -3.55885 | 0.000372 | 0.00132  | 7246.611 | 7896.415 | 6994.187 | 5770.048 | 5459.01  | 6210.773 |
| 9928  | LOC103230 | 980.502  | -0.34324 | 0.119237 | -2.87861 | 0.003994 | 0.010696 | 1100.977 | 1160.513 | 1032.465 | 830.3512 | 832.114  | 926.5911 |
| 15646 | CUNH10orf | 301.3769 | -0.34325 | 0.198928 | -1.7255  | 0.084437 | 0.143472 | 372.9554 | 275.3481 | 366.6504 | 234.3733 | 252.4151 | 306.5187 |
| 7295  | WDR82     | 8208.425 | -0.34341 | 0.094447 | -3.63604 | 0.000277 | 0.001009 | 9252.33  | 9661.819 | 8634.722 | 7138.342 | 6810.928 | 7752.412 |
| 10142 | NDUF54    | 1753.564 | -0.34347 | 0.121444 | -2.82821 | 0.004681 | 0.01227  | 2088.659 | 1685.481 | 2109.458 | 1502.221 | 1615.029 | 1520.534 |
| 25483 | LOC103230 | 1.654724 | -0.34347 | 2.049034 | -0.16763 | 0.866878 | 0.904395 | 1.084173 | 2.737059 | 2.087194 | 0        | 0        | 4.019918 |
| 8813  | CDK2      | 4093.792 | -0.3435  | 0.108302 | -3.1717  | 0.001515 | 0.004572 | 4359.459 | 5152.787 | 4227.96  | 3524.529 | 3493.168 | 3804.852 |
| 7846  | PRKDC     | 41525.96 | -0.34357 | 0.099468 | -3.45408 | 0.000552 | 0.001871 | 44873.37 | 50027.97 | 44449.58 | 35394.84 | 34095.28 | 40314.75 |
| 9970  | TMTC4     | 1098.425 | -0.34362 | 0.11974  | -2.86975 | 0.004108 | 0.010953 | 1310.765 | 1100.298 | 1275.971 | 968.7431 | 951.9042 | 982.8699 |
| 8762  | CENPT     | 1197.427 | -0.34376 | 0.107936 | -3.18486 | 0.001448 | 0.004394 | 1344.916 | 1349.918 | 1326.76  | 982.1359 | 1082.39  | 1098.443 |
| 9805  | CEP89     | 1500.737 | -0.34384 | 0.118395 | -2.90419 | 0.003682 | 0.009984 | 1654.448 | 1860.105 | 1522.956 | 1361.597 | 1238.545 | 1366.772 |
| 13033 | ONECUT2   | 997.1972 | -0.34386 | 0.156417 | -2.19835 | 0.027924 | 0.05696  | 950.8195 | 1375.646 | 1022.029 | 832.5834 | 868.4789 | 933.6259 |
| 7793  | NUDCD3    | 7525.195 | -0.34387 | 0.099192 | -3.46669 | 0.000527 | 0.001797 | 8788.304 | 8121.949 | 8352.951 | 6337.008 | 6205.56  | 7345.395 |
| 19428 | PGBD4     | 72.63256 | -0.34389 | 0.308778 | -1.11371 | 0.265405 | 0.363177 | 76.97626 | 81.56436 | 84.1835  | 75.89232 | 59.8951  | 57.28383 |
| 7286  | ADNP2     | 3361.106 | -0.34395 | 0.094531 | -3.63847 | 0.000274 | 0.001001 | 3697.571 | 3913.447 | 3674.157 | 2959.8   | 2785.122 | 3136.541 |
| 9566  | ARL4A     | 922.1537 | -0.34396 | 0.11588  | -2.96824 | 0.002995 | 0.008323 | 1009.365 | 1069.643 | 1011.593 | 832.5834 | 844.9487 | 764.7894 |
| 16691 | LOC119620 | 187.2767 | -0.34401 | 0.222855 | -1.54367 | 0.122669 | 0.195384 | 193.5248 | 252.3568 | 182.9774 | 149.5525 | 175.4071 | 169.8415 |
| 8745  | TPGS2     | 4837.441 | -0.34418 | 0.107896 | -3.1899  | 0.001423 | 0.004327 | 5057.666 | 6103.642 | 5077.448 | 4234.345 | 4064.31  | 4487.233 |
| 19440 | LOC119620 | 74.66472 | -0.34423 | 0.309663 | -1.11164 | 0.266291 | 0.364174 | 89.98634 | 87.03848 | 74.44326 | 53.57105 | 70.59065 | 72.35852 |
| 25160 | LOC119624 | 2.419968 | -0.34435 | 1.562522 | -0.22038 | 0.825574 | 0.872306 | 1.626259 | 1.642235 | 4.87012  | 2.232127 | 2.139111 | 2.009959 |
| 12153 | EXOSC6    | 938.9292 | -0.34449 | 0.145049 | -2.37498 | 0.01755  | 0.03839  | 1162.233 | 991.3628 | 1005.332 | 749.9947 | 750.8278 | 973.8251 |
| 7041  | ZMPSTE24  | 4609.842 | -0.34481 | 0.092779 | -3.7165  | 0.000202 | 0.000763 | 5013.757 | 5560.062 | 4901.428 | 4078.096 | 3987.302 | 4118.406 |
| 18129 | TNC       | 112.5898 | -0.34484 | 0.262017 | -1.3161  | 0.188142 | 0.275897 | 122.5115 | 137.9478 | 117.5786 | 80.35657 | 117.6511 | 99.49297 |
| 24049 | LOC119623 | 11.57301 | -0.34506 | 0.865531 | -0.39867 | 0.69014  | 0.762916 | 5.96295  | 24.63353 | 8.348776 | 4.464254 | 14.97377 | 11.05477 |
| 11624 | PC        | 2552.896 | -0.34506 | 0.138702 | -2.4878  | 0.012854 | 0.029397 | 3072.003 | 2502.767 | 3004.864 | 2049.093 | 2004.347 | 2684.3   |
| 8116  | MRPL35    | 1582.275 | -0.34513 | 0.102304 | -3.37357 | 0.000742 | 0.00243  | 1698.899 | 1815.218 | 1793.595 | 1446.418 | 1413.952 | 1325.568 |
| 7545  | ARMT1     | 2613.287 | -0.34527 | 0.0974   | -3.54482 | 0.000393 | 0.001384 | 3062.788 | 2761.145 | 2951.988 | 2183.02  | 2370.135 | 2350.647 |
| 24125 | LOC119623 | 7.945676 | -0.34529 | 0.893254 | -0.38655 | 0.69909  | 0.770375 | 9.757555 | 8.758589 | 7.653045 | 8.928508 | 8.556443 | 4.019918 |
| 11534 | FAM76B    | 1478.792 | -0.3453  | 0.137734 | -2.50698 | 0.012177 | 0.028066 | 1507     | 1970.135 | 1485.386 | 1258.92  | 1401.117 | 1250.194 |
| 13456 | SPHK1     | 511.8027 | -0.34541 | 0.163242 | -2.11597 | 0.034348 | 0.067861 | 642.3723 | 492.1232 | 587.893  | 437.4969 | 406.431  | 504.4997 |
| 22206 | LOC119623 | 84.84046 | -0.34564 | 0.500123 | -0.6911  | 0.4895   | 0.586029 | 111.1277 | 29.56024 | 145.4079 | 84.82083 | 40.6431  | 97.48301 |
| 21473 | LOC119615 | 39.55189 | -0.34571 | 0.428123 | -0.8075  | 0.419376 | 0.519215 | 49.87195 | 47.62483 | 34.09084 | 37.94616 | 40.6431  | 27.13445 |
| 23656 | LOC119618 | 12.30708 | -0.34579 | 0.749539 | -0.46134 | 0.644558 | 0.724365 | 14.09425 | 13.13788 | 13.2189  | 13.39276 | 14.97377 | 5.024897 |
| 21454 | LOC103225 | 41.85416 | -0.34585 | 0.426652 | -0.81061 | 0.417588 | 0.51746  | 60.17159 | 36.12918 | 45.22254 | 29.01765 | 36.36488 | 44.2191  |
| 7204  | FADS1     | 10353.79 | -0.34605 | 0.094392 | -3.66607 | 0.000246 | 0.000909 | 11681.42 | 12096.71 | 10998.12 | 9022.257 | 8479.435 | 9844.779 |
| 10740 | MRPS16    | 1771.036 | -0.34633 | 0.129118 | -2.68229 | 0.007312 | 0.0181   | 2163.467 | 1652.636 | 2131.721 | 1629.453 | 1495.238 | 1553.698 |
| 7580  | SLC25A51  | 2044.84  | -0.34637 | 0.098044 | -3.53277 | 0.000411 | 0.001442 | 2380.843 | 2244.388 | 2243.734 | 1859.362 | 1700.593 | 1840.117 |
| 6981  | SRP9      | 10005.65 | -0.34637 | 0.092587 | -3.741   | 0.000183 | 0.000698 | 11493.32 | 10436.95 | 11666.72 | 8937.436 | 9234.541 | 8264.951 |
| 7832  | RNF185    | 3573.908 | -0.34643 | 0.100182 | -3.45802 | 0.000544 | 0.001847 |          |          |          |          |          |          |



|       |           |          |          |          |          |          |          |          |          |          |          |          |          |
|-------|-----------|----------|----------|----------|----------|----------|----------|----------|----------|----------|----------|----------|----------|
| 24438 | LOC103221 | 6.094366 | -0.34659 | 1.02094  | -0.33948 | 0.734247 | 0.798722 | 4.878777 | 5.474118 | 10.43597 | 4.464254 | 4.278221 | 7.034856 |
| 20405 | LOC103230 | 54.67157 | -0.34677 | 0.361097 | -0.96031 | 0.336898 | 0.438933 | 63.42411 | 70.61612 | 49.39693 | 53.57105 | 42.78221 | 48.23901 |
| 12850 | SH3KBP1   | 1498.972 | -0.34683 | 0.155633 | -2.22852 | 0.025846 | 0.053474 | 1467.428 | 2126.695 | 1440.86  | 1339.276 | 1274.91  | 1344.663 |
| 22744 | NAAA      | 21.94023 | -0.34686 | 0.576563 | -0.60159 | 0.547444 | 0.639896 | 18.97302 | 25.72836 | 28.52499 | 13.39276 | 29.94755 | 15.07469 |
| 16275 | ZNFS30    | 172.7802 | -0.34688 | 0.215066 | -1.6129  | 0.106767 | 0.174402 | 196.2353 | 185.0252 | 196.892  | 147.3204 | 177.5462 | 133.6623 |
| 10991 | LOC103237 | 19104.47 | -0.34694 | 0.131844 | -2.63143 | 0.008503 | 0.020566 | 18377.27 | 26155.34 | 19642.58 | 16196.31 | 16205.9  | 18049.43 |
| 17316 | LOC119627 | 121.1937 | -0.347   | 0.239981 | -1.44597 | 0.148185 | 0.227507 | 133.8953 | 138.4952 | 135.6676 | 107.1421 | 98.39909 | 113.5627 |
| 11432 | MED19     | 878.294  | -0.34707 | 0.137202 | -2.52961 | 0.011419 | 0.026552 | 883.6008 | 1126.026 | 942.716  | 781.2444 | 725.1585 | 811.0184 |
| 19663 | LOC103218 | 75.35404 | -0.34707 | 0.322464 | -1.0763  | 0.281793 | 0.380993 | 97.57555 | 67.33165 | 86.96642 | 66.96381 | 77.00798 | 56.27885 |
| 23619 | LOC103235 | 12.50944 | -0.34713 | 0.744721 | -0.46613 | 0.641125 | 0.721635 | 21.14137 | 9.306001 | 11.82743 | 11.16063 | 8.556443 | 13.06473 |
| 12992 | WBP11     | 4581.336 | -0.34747 | 0.157605 | -2.2047  | 0.027475 | 0.056221 | 4261.341 | 6730.428 | 4399.805 | 4035.686 | 3925.268 | 4135.491 |
| 22045 | LOC119620 | 30.0764  | -0.34756 | 0.484595 | -0.71722 | 0.473236 | 0.570695 | 40.11439 | 24.63353 | 36.17803 | 22.32127 | 32.08666 | 25.12449 |
| 8295  | STUB1     | 2428.373 | -0.348   | 0.104999 | -3.31429 | 0.000919 | 0.002945 | 2881.189 | 2466.638 | 2813.538 | 2187.484 | 2038.572 | 2182.815 |
| 7680  | TCAIM     | 1966.042 | -0.34812 | 0.099516 | -3.49813 | 0.000469 | 0.001622 | 2137.447 | 2347.302 | 2120.589 | 1763.38  | 1707.01  | 1720.525 |
| 21381 | TUBA3E    | 37.01619 | -0.34825 | 0.424798 | -0.8198  | 0.412331 | 0.512689 | 44.99317 | 37.224   | 41.74388 | 40.17829 | 27.80844 | 30.14938 |
| 7878  | ADGRL2    | 21493.21 | -0.34826 | 0.10104  | -3.44676 | 0.000567 | 0.001915 | 23131.91 | 26641.99 | 22455.43 | 19040.04 | 17613.44 | 20076.47 |
| 12828 | MXD4      | 1292.288 | -0.34832 | 0.155936 | -2.23375 | 0.025499 | 0.052845 | 1634.39  | 1185.147 | 1528.522 | 1140.617 | 962.5998 | 1302.453 |
| 8554  | SPECC1L   | 8687.3   | -0.34839 | 0.107537 | -2.23975 | 0.001196 | 0.003718 | 9404.114 | 10867.77 | 8927.625 | 7408.429 | 7223.777 | 8292.086 |
| 20584 | LOC119627 | 51.52216 | -0.34893 | 0.371148 | -0.94013 | 0.347151 | 0.448358 | 50.95612 | 54.74118 | 66.79021 | 55.80317 | 40.6431  | 40.19918 |
| 21189 | LOC119624 | 42.05864 | -0.34906 | 0.409611 | -0.85218 | 0.394113 | 0.494479 | 51.49821 | 52.00412 | 36.87376 | 40.17829 | 40.6431  | 31.15436 |
| 8511  | ANKH      | 11630.6  | -0.34912 | 0.107291 | -3.25393 | 0.001138 | 0.003555 | 12319.45 | 14584.15 | 12195.48 | 10095.91 | 9497.651 | 11090.95 |
| 7633  | PLCB3     | 4791.513 | -0.3493  | 0.099396 | -3.5142  | 0.000441 | 0.001536 | 5406.769 | 5411.166 | 5296.603 | 4209.791 | 3811.895 | 4612.856 |
| 12782 | NAF1      | 661.9254 | -0.34933 | 0.155767 | -2.24264 | 0.02492  | 0.05183  | 674.3554 | 860.5314 | 694.3399 | 571.4245 | 517.6648 | 653.2367 |
| 9022  | SRA1      | 1226.52  | -0.34939 | 0.112366 | -3.10937 | 0.001875 | 0.005525 | 1399.125 | 1267.258 | 1458.949 | 1051.332 | 1075.973 | 1106.482 |
| 6486  | LANCL2    | 3590.059 | -0.34943 | 0.088558 | -3.94579 | 7.95E-05 | 0.000326 | 4051.554 | 4153.213 | 3866.179 | 3122.746 | 3099.571 | 3247.089 |
| 19419 | ANKRD24   | 73.13291 | -0.34963 | 0.313557 | -1.11505 | 0.264829 | 0.362557 | 69.92914 | 86.49107 | 88.35788 | 71.42806 | 66.31243 | 56.27885 |
| 7323  | NAXE      | 6268.639 | -0.34964 | 0.096422 | -3.62612 | 0.000288 | 0.001044 | 7361.533 | 6357.641 | 7353.881 | 5689.692 | 5382.002 | 5467.088 |
| 9038  | MEN1      | 2159.957 | -0.3498  | 0.112739 | -3.10279 | 0.001917 | 0.005639 | 2282.726 | 2683.96  | 2298.001 | 1941.95  | 1756.21  | 1996.894 |
| 20327 | LOC103247 | 57.079   | -0.34993 | 0.359269 | -0.97402 | 0.330048 | 0.431658 | 52.58238 | 74.99542 | 64.70302 | 40.17829 | 57.75599 | 52.25893 |
| 7998  | RABL3     | 1832.878 | -0.35006 | 0.102561 | -3.41318 | 0.000642 | 0.002134 | 1931.454 | 2174.867 | 2057.973 | 1546.864 | 1644.976 | 1641.131 |
| 8650  | URI1      | 3716.615 | -0.35037 | 0.108966 | -3.21544 | 0.001302 | 0.004003 | 3974.577 | 4713.763 | 3810.521 | 3229.888 | 3202.249 | 3368.691 |
| 8358  | SLC39A6   | 3490.034 | -0.35054 | 0.106392 | -3.2948  | 0.000985 | 0.003133 | 3805.446 | 4296.635 | 3639.371 | 2919.622 | 2979.781 | 3299.348 |
| 6320  | ACP1      | 5481.5   | -0.35062 | 0.087303 | -4.0161  | 5.92E-05 | 0.000249 | 5916.331 | 6456.722 | 6057.037 | 4979.875 | 4761.66  | 4717.374 |
| 9206  | PIEZO1    | 6889.194 | -0.35069 | 0.114837 | -3.05378 | 0.00226  | 0.006526 | 8145.932 | 6884.798 | 8144.231 | 6037.93  | 5396.976 | 6725.323 |
| 9209  | ZKSCAN5   | 1314.445 | -0.35075 | 0.114862 | -3.0537  | 0.00226  | 0.006526 | 1503.748 | 1571.619 | 1346.24  | 1187.492 | 1086.668 | 1190.901 |
| 24843 | LOC103227 | 4.0717   | -0.35078 | 1.278191 | -0.27443 | 0.783753 | 0.838694 | 1.626259 | 3.831883 | 8.348776 | 4.464254 | 2.139111 | 4.019918 |
| 6448  | PMPCB     | 5134.041 | -0.35078 | 0.088568 | -3.96059 | 7.48E-05 | 0.000308 | 5974.334 | 5455.506 | 5831.62  | 4555.771 | 4635.453 | 4351.561 |
| 21391 | LOC103237 | 51.67368 | -0.35105 | 0.429333 | -0.81766 | 0.413549 | 0.513964 | 40.65648 | 73.35318 | 58.44144 | 69.19594 | 34.22577 | 34.1693  |
| 9897  | EML6      | 888.5159 | -0.35117 | 0.1217   | -2.88552 | 0.003908 | 0.010497 | 956.7824 | 1084.423 | 946.8904 | 756.691  | 806.4447 | 779.8641 |
| 15068 | LOC103234 | 357.4011 | -0.35125 | 0.192791 | -1.82192 | 0.068467 | 0.120799 | 332.841  | 391.9469 | 474.4888 | 361.6046 | 310.171  | 273.3544 |
| 11510 | LOC103246 | 844.3124 | -0.35132 | 0.139839 | -2.51231 | 0.011994 | 0.027704 | 1015.328 | 845.2038 | 985.1556 | 716.5128 | 669.5416 | 834.133  |
| 25809 | LOC119615 | 0.877967 | -0.35139 | 2.957203 | -0.11883 | 0.905414 | 0.932622 | 2.710432 | 0.547412 | 0        | 0        | 0        | 2.009959 |
| 9457  | EHBP1L1   | 3044.561 | -0.3515  | 0.11733  | -2.99587 | 0.002737 | 0.007693 | 3101.276 | 3910.163 | 3230.976 | 2770.07  | 2494.203 | 2760.679 |
| 7342  | ICMT      | 5622.371 | -0.35175 | 0.097209 | -3.61854 | 0.000296 | 0.001073 | 6649.231 | 6132.655 | 6139.829 | 4689.699 | 4738.13  | 5384.68  |
| 25810 | TRNAV-AA  | 8889162  | -0.35184 | 2.961625 | -0.1188  | 0.905434 | 0.932622 | 0.542086 | 0        | 2.782925 | 0        | 0        | 2.009959 |
| 22889 | LOC119615 | 20.42293 | -0.352   | 0.605806 | -0.58104 | 0.561211 | 0.651833 | 26.02015 | 26.82318 | 16.00182 | 8.928508 | 25.66933 | 19.09461 |
| 23337 | LOC119624 | 14.83947 | -0.352   | 0.692737 | -0.50813 | 0.611361 | 0.696449 | 11.38381 | 19.15941 | 19.48048 | 6.696381 | 19.252   | 13.06473 |
| 9297  | GNL3L     | 991.7006 | -0.35203 | 0.116071 | -3.0329  | 0.002422 | 0.006926 | 1149.765 | 1107.962 | 1083.254 | 810.2621 | 866.3398 | 932.6209 |
| 8737  | THADA     | 3327.343 | -0.35206 | 0.11028  | -3.19241 | 0.001411 | 0.004293 | 4074.863 | 3503.983 | 3622.673 | 2787.927 | 2746.618 | 3227.994 |
| 7429  | PSMD11    | 5452.17  | -0.35218 | 0.098179 | -3.58713 | 0.000334 | 0.001196 | 5911.994 | 6555.256 | 5883.104 | 4551.307 | 4639.731 | 5171.624 |
| 5961  | LOC103218 | 5032.421 | -0.35228 | 0.084242 | -4.18175 | 2.89E-05 | 0.000129 | 5488.624 | 5868.802 | 5572.808 | 4417.379 | 4462.185 | 4384.725 |
| 14565 | SLC26A5   | 253.4663 | -0.35231 | 0.184212 | -1.91252 | 0.05581  | 0.101868 | 309.5313 | 283.0119 | 259.5078 | 243.3018 | 205.3546 | 220.0905 |
| 16080 | LOC103215 | 697.0143 | -0.35236 | 0.213384 | -1.6513  | 0.098678 | 0.163143 | 599.5475 | 1045.557 | 695.7314 | 631.6919 | 725.1585 | 484.4001 |
| 13518 | EEF1AKMT  | 366.8581 | -0.35237 | 0.167435 | -2.10449 | 0.035336 | 0.069492 | 390.8443 | 468.5845 | 372.912  | 339.2833 | 323.0057 | 306.5187 |
| 24415 | LOC119627 | 7.560352 | -0.35245 | 1.023487 | -0.34436 | 0.730575 | 0.795509 | 8.673382 | 10.40082 | 5.565851 | 11.16063 | 8.556443 | 1.004979 |
| 7300  | THAP12    | 5632.537 | -0.35247 | 0.096956 | -3.63538 | 0.000278 | 0.001011 | 5990.596 | 6869.471 | 6089.737 | 4770.055 | 5217.291 | 4858.071 |
| 9623  | SLC35F2   | 805.4012 | -0.35248 | 0.119299 | -2.95457 | 0.003131 | 0.00865  | 946.4828 | 867.1003 | 898.1892 | 678.5666 | 714.463  | 727.6051 |
| 12154 | FRG1      | 1786.52  | -0.35248 | 0.148421 | -2.37488 | 0.017554 | 0.038398 | 1722.75  | 2463.353 | 1820.729 | 1683.024 | 1602.194 | 1427.071 |
| 9171  | POGZ      | 2795.816 | -0.35259 | 0.115144 | -3.06219 | 0.002197 | 0.006369 | 3111.576 | 3514.384 | 2785.013 | 2361.59  | 2389.387 | 2612.947 |
| 9775  | RBM33     | 2876.916 | -0.35277 | 0.121232 | -2.9099  | 0.003615 | 0.009833 | 2989.064 | 3763.456 | 2930.421 | 2412.929 | 2530.568 | 2635.056 |
| 10050 | CUNH12or  | 717.7861 | -0.3529  | 0.123781 | -2.85096 | 0.004359 | 0.01153  | 855.9544 | 768.0188 | 791.0466 | 624.9956 | 639.5941 | 627.1072 |
| 10444 | NXT2      | 701.7423 | -0.35297 | 0.128055 | -2.75639 | 0.005844 | 0.014877 | 722.6011 | 815.0962 | 824.4417 | 598.21   | 631.0376 | 619.0674 |
| 7838  | FBXO28    | 3647.068 | -0.35302 | 0.102148 | -3.45594 | 0.000548 | 0.00186  | 4125.819 | 4186.606 | 3969.843 | 3080.335 | 2971.225 | 3548.583 |
| 15501 | DFFB      | 206.1772 | -0.35302 | 0.202396 | -1.7442  | 0.081125 | 0.139133 | 238.518  | 247.4301 | 210.1109 | 178.5702 | 160.4333 | 202.0009 |
| 9203  | GDAP2     | 1265.905 | -0.35324 | 0.115658 | -3.05422 | 0.002256 | 0.006518 | 1373.105 | 1542.059 | 1348.327 | 1120.528 | 1039.608 | 1171.806 |
| 20673 | LOC119615 | 50.53685 | -0.35329 | 0.38165  | -0.92568 | 0.354614 | 0.456025 | 62.88202 | 43.24553 | 64.70302 | 44.64254 | 38.50399 | 49.24399 |
| 12352 | WDR4      | 812.5503 | -0.35332 | 0.151414 | -2.33344 | 0.019625 | 0.042239 | 1039.722 | 776.23   | 922.5398 | 718.7449 | 633.1768 | 784.889  |
| 6622  | STRN4     | 3946.032 | -0.35333 | 0.090788 | -3.89183 | 9.95E-05 | 0.000399 | 4242.368 | 4614.682 | 4428.33  | 3426.315 | 3345.569 | 3618.931 |
| 7152  | CHMP2A    | 4056.975 | -0.35335 | 0.096602 | -3.68001 | 0.000233 | 0.000867 | 4449.987 | 4922.327 | 4281.531 | 3653.992 | 3448.246 | 3585.767 |
| 7786  | NELFE     | 2432.712 | -0.35337 | 0.101851 | -3.4695  | 0.000521 | 0.00178  | 2747.836 | 2676.296 | 2770.402 | 2136.146 | 1955.147 | 2310.448 |
| 13370 | ZSCAN32   | 342.3917 | -0.35351 | 0.165783 | -2.13234 | 0.032979 | 0.065576 | 389.218  | 41       |          |          |          |          |



|       |           |          |          |          |          |          |          |          |          |          |          |          |          |
|-------|-----------|----------|----------|----------|----------|----------|----------|----------|----------|----------|----------|----------|----------|
| 9865  | FAM151B   | 779.7562 | -0.35399 | 0.122478 | -2.89022 | 0.00385  | 0.010375 | 904.7422 | 868.1951 | 847.4008 | 707.5843 | 714.463  | 636.152  |
| 13733 | CIAO2B    | 1412.888 | -0.35424 | 0.171645 | -2.06379 | 0.039038 | 0.075571 | 1847.972 | 1134.785 | 1776.202 | 1214.277 | 1176.511 | 1327.578 |
| 11637 | SLC4A11   | 485.0243 | -0.35428 | 0.142545 | -2.48538 | 0.012941 | 0.029565 | 561.0594 | 526.6102 | 548.2363 | 430.8005 | 387.179  | 456.2607 |
| 9462  | WAPL      | 8984.296 | -0.35444 | 0.118373 | -2.99426 | 0.002751 | 0.00773  | 9482.175 | 11855.85 | 8911.623 | 7658.428 | 7730.746 | 8266.961 |
| 13175 | TMEM225I  | 576.4229 | -0.3545  | 0.163015 | -2.17465 | 0.029657 | 0.059842 | 728.022  | 553.9808 | 663.7277 | 468.7467 | 464.187  | 579.8732 |
| 11179 | DDX28     | 505.1561 | -0.35458 | 0.13712  | -2.58594 | 0.009711 | 0.023095 | 586.5375 | 574.235  | 538.4961 | 464.2824 | 434.2395 | 433.1462 |
| 12415 | RAB6A     | 3975.258 | -0.35472 | 0.153072 | -2.31731 | 0.020487 | 0.043869 | 3680.224 | 5742.897 | 3960.103 | 3408.458 | 3660.018 | 3399.846 |
| 10370 | TTC23     | 936.9986 | -0.35473 | 0.128013 | -2.77104 | 0.005588 | 0.014325 | 1007.739 | 1173.651 | 976.1111 | 776.7802 | 821.4185 | 866.2923 |
| 15220 | LOC103227 | 950.8719 | -0.35482 | 0.19797  | -1.79229 | 0.073087 | 0.127665 | 1301.549 | 700.1397 | 1200.137 | 863.8331 | 806.4447 | 833.128  |
| 9866  | STX10     | 1425.544 | -0.35489 | 0.122794 | -2.89011 | 0.003851 | 0.010377 | 1728.713 | 1441.883 | 1634.969 | 1234.366 | 1146.563 | 1366.772 |
| 9408  | DDHD1     | 1941.213 | -0.3549  | 0.118074 | -3.00571 | 0.00265  | 0.007487 | 2160.756 | 2446.931 | 1929.263 | 1738.827 | 1627.863 | 1743.639 |
| 7597  | CDC42BPB  | 5998.149 | -0.35492 | 0.100631 | -3.52694 | 0.00042  | 0.001471 | 6506.121 | 7275.103 | 6422.992 | 5053.535 | 5009.797 | 5721.348 |
| 9155  | OLA1      | 5110.76  | -0.35497 | 0.115769 | -3.06617 | 0.002168 | 0.006296 | 5114.043 | 6660.907 | 5431.575 | 4620.503 | 4489.993 | 4347.541 |
| 11043 | SEC61A2   | 850.9914 | -0.35499 | 0.135589 | -2.61815 | 0.008841 | 0.021283 | 922.0889 | 1071.285 | 867.577  | 774.5481 | 785.0536 | 685.396  |
| 8693  | UBE2M     | 2568.281 | -0.35525 | 0.110822 | -3.20562 | 0.001348 | 0.004122 | 3074.172 | 2727.206 | 2855.282 | 2185.252 | 2066.381 | 2501.394 |
| 8963  | SAV1      | 1243.693 | -0.35526 | 0.113358 | -3.12788 | 0.001761 | 0.005222 | 1376.899 | 1458.852 | 1356.676 | 988.8323 | 1125.172 | 1155.726 |
| 11609 | THRAP3    | 11347.58 | -0.35527 | 0.142563 | -2.49204 | 0.012701 | 0.029087 | 11190.29 | 16093.91 | 10931.33 | 9796.805 | 9482.678 | 10590.47 |
| 7172  | CAMSAP1   | 4030.242 | -0.35534 | 0.096718 | -3.67403 | 0.000239 | 0.000885 | 4478.718 | 4616.324 | 4486.076 | 3415.154 | 3322.039 | 3863.141 |
| 11244 | PURA      | 1794.471 | -0.35535 | 0.138186 | -2.57156 | 0.010124 | 0.023936 | 1794.306 | 2432.151 | 1818.642 | 1486.597 | 1582.942 | 1652.186 |
| 9057  | EXOSC1    | 1227.318 | -0.35537 | 0.114899 | -3.0929  | 0.001982 | 0.005818 | 1395.872 | 1361.961 | 1382.418 | 1037.939 | 996.8256 | 1188.891 |
| 8232  | FOXN2     | 2236.067 | -0.3556  | 0.106557 | -3.3372  | 0.000846 | 0.002733 | 2481.129 | 2666.443 | 2386.359 | 2042.396 | 1781.879 | 2058.198 |
| 13221 | DPH7      | 626.1447 | -0.35562 | 0.164293 | -2.16454 | 0.030423 | 0.061179 | 813.1296 | 575.3298 | 723.5606 | 540.1747 | 502.691  | 601.9827 |
| 6755  | BUB3      | 5320.157 | -0.35564 | 0.092782 | -3.83311 | 0.000127 | 0.000498 | 6095.219 | 5862.781 | 5968.679 | 4408.451 | 4532.776 | 5053.037 |
| 12610 | STARD3    | 1006.939 | -0.35565 | 0.155594 | -2.28071 | 0.022566 | 0.047576 | 1248.425 | 954.6862 | 1193.179 | 912.9399 | 729.4367 | 1002.97  |
| 9384  | MRPL9     | 2612.243 | -0.3559  | 0.118187 | -3.01134 | 0.002601 | 0.007369 | 2708.806 | 3372.057 | 2714.048 | 2404.001 | 2286.709 | 2187.84  |
| 25246 | LOC103244 | 2.402691 | -0.356   | 1.712194 | -0.20792 | 0.835292 | 0.879576 | 2.710432 | 0.547412 | 4.87012  | 0        | 4.278221 | 2.009959 |
| 8675  | PAXBP1    | 3363.969 | -0.35612 | 0.110927 | -3.21043 | 0.001325 | 0.004062 | 3523.561 | 4309.773 | 3497.442 | 2919.622 | 2979.781 | 2953.635 |
| 9084  | METTL17   | 1561.574 | -0.35617 | 0.115338 | -3.08807 | 0.002015 | 0.005896 | 1752.565 | 1811.933 | 1703.846 | 1279.009 | 1283.466 | 1538.624 |
| 10673 | HSPB11    | 613.0066 | -0.35621 | 0.131996 | -2.69863 | 0.006962 | 0.017343 | 647.7932 | 719.8465 | 694.3399 | 549.1032 | 560.447  | 506.5097 |
| 7274  | ABCB7     | 1553.397 | -0.35627 | 0.097825 | -3.64195 | 0.000271 | 0.000989 | 1747.144 | 1733.106 | 1753.939 | 1377.222 | 1324.11  | 1384.862 |
| 24422 | LOC119625 | 6.423615 | -0.35628 | 1.04169  | -0.34202 | 0.732335 | 0.797196 | 8.131296 | 10.40082 | 2.782925 | 8.928508 | 4.278221 | 4.019918 |
| 22221 | PRRT1     | 26.15445 | -0.35629 | 0.51743  | -0.68858 | 0.49109  | 0.587535 | 21.68345 | 38.31883 | 27.82925 | 22.32127 | 25.66933 | 21.10457 |
| 12371 | PUS1      | 981.3837 | -0.35635 | 0.153078 | -2.32793 | 0.019916 | 0.042799 | 1249.509 | 979.8671 | 1083.254 | 823.6549 | 737.9932 | 1014.024 |
| 6876  | POLR1D    | 2133.48  | -0.35648 | 0.094132 | -3.78709 | 0.000152 | 0.000589 | 2342.355 | 2472.659 | 2369.661 | 1863.826 | 1927.339 | 1825.043 |
| 6292  | TIAL1     | 3716.077 | -0.35653 | 0.088479 | -4.02955 | 5.59E-05 | 0.000236 | 4004.392 | 4262.696 | 4253.702 | 3312.476 | 3148.771 | 3314.422 |
| 11605 | LOC103244 | 554.2634 | -0.35656 | 0.143051 | -2.49256 | 0.012683 | 0.029054 | 595.2108 | 615.2909 | 653.2918 | 470.9788 | 547.6123 | 443.1959 |
| 16470 | GDF11     | 153.8057 | -0.35658 | 0.225982 | -1.57792 | 0.114585 | 0.184956 | 163.7101 | 168.6028 | 185.0645 | 120.5349 | 158.2942 | 126.6274 |
| 10551 | WDR92     | 1245.877 | -0.35659 | 0.130428 | -2.73404 | 0.006256 | 0.015764 | 1308.596 | 1628.003 | 1260.665 | 1082.582 | 1090.946 | 1104.472 |
| 8201  | LOC103217 | 1973.115 | -0.35667 | 0.106603 | -3.3458  | 0.00082  | 0.002659 | 2311.998 | 2028.708 | 2311.22  | 1691.952 | 1672.785 | 1822.028 |
| 9844  | MRPL42    | 2527.233 | -0.35677 | 0.123214 | -2.89554 | 0.003785 | 0.010222 | 2907.209 | 2480.87  | 3121.051 | 2241.055 | 2419.334 | 1993.879 |
| 15340 | ZNF280B   | 296.022  | -0.35695 | 0.201367 | -1.77264 | 0.076288 | 0.132214 | 288.3899 | 414.9382 | 294.9901 | 247.7661 | 256.6933 | 273.3544 |
| 10986 | LOC103225 | 1150.67  | -0.35697 | 0.135595 | -2.63263 | 0.008473 | 0.020503 | 1339.495 | 1109.056 | 1431.815 | 1037.939 | 913.4003 | 1072.313 |
| 11277 | HNRNPR    | 11681.42 | -0.3572  | 0.139367 | -2.56305 | 0.010376 | 0.024461 | 11528.01 | 16529.65 | 11303.55 | 10024.48 | 10207.84 | 10495    |
| 7446  | ARIH1     | 4013.079 | -0.35728 | 0.099698 | -3.58367 | 0.000339 | 0.00121  | 4369.758 | 4945.866 | 4209.175 | 3482.118 | 3437.551 | 3634.006 |
| 7583  | RADX      | 4452.854 | -0.35743 | 0.101211 | -3.53157 | 0.000413 | 0.001448 | 4741.087 | 5507.51  | 4760.194 | 3872.74  | 3741.305 | 4094.286 |
| 9090  | RUFY1     | 2978.505 | -0.35753 | 0.115867 | -3.0857  | 0.002031 | 0.005939 | 3140.848 | 3812.176 | 3086.96  | 2642.838 | 2438.586 | 2749.624 |
| 19334 | LOC119627 | 75.14956 | -0.35758 | 0.316647 | -1.12928 | 0.258781 | 0.355835 | 92.15468 | 89.22813 | 70.26887 | 66.96381 | 77.00798 | 55.27387 |
| 6434  | SOC54     | 4557.917 | -0.3576  | 0.090138 | -3.96718 | 7.27E-05 | 0.000301 | 5072.844 | 5433.61  | 4854.814 | 3930.776 | 3987.302 | 4068.157 |
| 9383  | PPP2R5E   | 1816.17  | -0.3577  | 0.118779 | -3.01148 | 0.0026   | 0.007366 | 1903.265 | 2308.983 | 1910.478 | 1488.829 | 1634.281 | 1651.181 |
| 9416  | EED       | 1349.719 | -0.35775 | 0.119093 | -3.00398 | 0.002665 | 0.007523 | 1676.131 | 1388.236 | 1486.082 | 1107.135 | 1225.71  | 1215.02  |
| 10301 | LOC103248 | 618.4336 | -0.35778 | 0.128344 | -2.78767 | 0.005309 | 0.013701 | 684.6551 | 724.7732 | 672.7722 | 537.9426 | 566.8643 | 523.5943 |
| 6938  | FAM204A   | 2512.168 | -0.35787 | 0.095132 | -3.76182 | 0.000169 | 0.000646 | 2799.334 | 2769.356 | 2894.938 | 2138.378 | 2344.465 | 2126.537 |
| 19057 | LOC119628 | 75.52258 | -0.35789 | 0.304302 | -1.17612 | 0.239547 | 0.334175 | 95.94929 | 75.54283 | 83.48776 | 62.49956 | 66.31243 | 69.34358 |
| 7756  | LRIG2     | 1713.646 | -0.3581  | 0.103003 | -3.47662 | 0.000508 | 0.00174  | 1968.858 | 1876.528 | 1936.22  | 1406.24  | 1493.099 | 1600.932 |
| 19045 | LOC103236 | 76.17576 | -0.35821 | 0.304204 | -1.17754 | 0.238981 | 0.333526 | 79.6867  | 88.68071 | 86.96642 | 78.12444 | 66.31243 | 57.28383 |
| 22369 | LOC119615 | 26.93688 | -0.35828 | 0.53952  | -0.66407 | 0.506647 | 0.602137 | 42.28274 | 28.46541 | 20.17621 | 15.62489 | 29.94755 | 25.12449 |
| 20213 | LOC119627 | 62.02093 | -0.35828 | 0.360281 | -0.99445 | 0.320003 | 0.420882 | 69.38706 | 77.18507 | 62.61582 | 71.42806 | 34.22577 | 57.28383 |
| 7501  | RHOQ      | 2813.873 | -0.35851 | 0.100711 | -3.55979 | 0.000371 | 0.001315 | 3063.33  | 3396.69  | 3029.91  | 2332.573 | 2457.838 | 2602.897 |
| 12339 | ALKBH1    | 451.6448 | -0.35852 | 0.153442 | -2.33653 | 0.019464 | 0.041936 | 520.945  | 451.6147 | 552.4107 | 383.9258 | 382.9008 | 418.0715 |
| 9992  | USP21     | 902.8002 | -0.35854 | 0.125231 | -2.86306 | 0.004196 | 0.011163 | 963.2875 | 1043.367 | 1041.51  | 801.3336 | 708.0456 | 859.2574 |
| 9294  | PACSIN2   | 2451.535 | -0.35855 | 0.118182 | -3.03386 | 0.002414 | 0.006906 | 2737.536 | 2951.645 | 2583.251 | 2031.236 | 1959.425 | 2446.12  |
| 23000 | MX1       | 18.46531 | -0.35856 | 0.636571 | -0.56326 | 0.573255 | 0.662608 | 13.01007 | 26.82318 | 21.56767 | 20.08914 | 19.252   | 10.04979 |
| 18197 | LOC103248 | 199.3905 | -0.35864 | 0.275372 | -1.30238 | 0.192787 | 0.281653 | 187.0198 | 317.4989 | 166.2798 | 207.5878 | 156.1551 | 161.8017 |
| 22268 | LOC119615 | 23.66832 | -0.3587  | 0.527994 | -0.67936 | 0.496908 | 0.593241 | 28.18849 | 24.63353 | 26.43779 | 17.85702 | 27.80844 | 17.08465 |
| 10471 | DXO       | 1225.335 | -0.35872 | 0.130399 | -2.75096 | 0.005942 | 0.015086 | 1300.465 | 1570.524 | 1261.361 | 1120.528 | 977.5736 | 1121.557 |
| 8036  | PRC1      | 7176.461 | -0.35891 | 0.105473 | -3.40291 | 0.000667 | 0.002206 | 7726.899 | 8921.718 | 7551.468 | 6138.349 | 5897.528 | 6822.806 |
| 10319 | RAB2B     | 1170.887 | -0.35893 | 0.128949 | -2.78346 | 0.005378 | 0.013856 | 1226.741 | 1463.779 | 1253.708 | 968.7431 | 1146.563 | 965.7853 |
| 9186  | RABL2B    | 1204.543 | -0.35898 | 0.117366 | -3.05866 | 0.002223 | 0.006434 | 1277.698 | 1433.672 | 1344.849 | 1156.242 | 1028.912 | 985.8849 |
| 19055 | LOC119627 | 87.75726 | -0.35904 | 0.305231 | -1.17631 | 0.239473 | 0.334106 | 94.86511 | 120.4306 | 79.31338 | 75.89232 | 87.70354 | 68.3386  |
| 8246  | JMJD6     | 1249.606 | -0.35936 | 0.107863 | -3.33165 | 0.000863 | 0.002783 | 1453.876 | 1353.202 | 1410.247 | 1082.582 | 1046.025 | 1151.706 |
|       |           |          |          |          |          |          |          |          |          |          |          |          |          |



|       |           |          |          |          |          |          |          |          |          |          |          |          |          |
|-------|-----------|----------|----------|----------|----------|----------|----------|----------|----------|----------|----------|----------|----------|
| 21602 | ANO3      | 34.51566 | -0.3597  | 0.455335 | -0.78997 | 0.429546 | 0.528615 | 39.5723  | 44.88777 | 31.30791 | 24.5534  | 40.6431  | 26.12947 |
| 6484  | TUBB6     | 6457.804 | -0.35976 | 0.091164 | -3.94628 | 7.94E-05 | 0.000325 | 7105.668 | 7541.145 | 7134.029 | 5819.155 | 5236.543 | 5910.284 |
| 10561 | ZCCHC7    | 2008.42  | -0.35978 | 0.131753 | -2.73074 | 0.006319 | 0.015907 | 2057.76  | 2698.74  | 2014.838 | 1741.059 | 1807.549 | 1730.575 |
| 9183  | DCXR      | 1833.422 | -0.35991 | 0.117611 | -3.06019 | 0.002212 | 0.006404 | 1987.289 | 2227.419 | 1973.094 | 1654.006 | 1416.091 | 1742.634 |
| 8179  | NSD1      | 9838.901 | -0.35997 | 0.107362 | -3.35287 | 0.0008   | 0.0026   | 10519.19 | 12493.58 | 10172.29 | 8354.851 | 8269.802 | 9223.702 |
| 19001 | LTB4R     | 97.74557 | -0.35999 | 0.303913 | -1.18453 | 0.236205 | 0.330483 | 93.23886 | 127.547  | 107.8384 | 66.96381 | 115.512  | 75.37346 |
| 10699 | CUNH11or  | 1016.539 | -0.36    | 0.133703 | -2.69251 | 0.007092 | 0.017621 | 1253.846 | 996.2895 | 1182.048 | 879.458  | 827.8358 | 959.7554 |
| 8892  | HIRA      | 2131.579 | -0.36004 | 0.114419 | -3.14666 | 0.001651 | 0.004938 | 2462.156 | 2406.422 | 2329.309 | 1758.916 | 1709.149 | 2123.522 |
| 23241 | ADAMTS17  | 16.83983 | -0.36009 | 0.688334 | -0.52314 | 0.600878 | 0.687341 | 24.39389 | 15.87494 | 15.30609 | 22.32127 | 17.11289 | 6.029877 |
| 15986 | PLEKHJ1   | 553.4795 | -0.36033 | 0.215999 | -1.66819 | 0.095279 | 0.158461 | 720.4328 | 421.5071 | 728.4307 | 470.9788 | 410.7092 | 568.8184 |
| 12773 | ZFP64     | 619.1391 | -0.36056 | 0.160527 | -2.24611 | 0.024697 | 0.051402 | 600.0896 | 826.0444 | 665.1192 | 524.5498 | 509.1083 | 589.9229 |
| 17910 | LOC119620 | 105.3822 | -0.36059 | 0.265226 | -1.35956 | 0.173969 | 0.258233 | 106.2489 | 120.4306 | 127.3188 | 104.91   | 91.98176 | 81.40334 |
| 14116 | MDC1      | 1510.706 | -0.3606  | 0.181131 | -1.99085 | 0.046497 | 0.08757  | 1386.115 | 2310.078 | 1399.812 | 1314.723 | 1287.745 | 1365.767 |
| 23434 | LOC103225 | 15.27    | -0.36068 | 0.729374 | -0.4945  | 0.620951 | 0.704446 | 24.39389 | 7.663765 | 18.78475 | 15.62489 | 17.11289 | 8.039836 |
| 8424  | NPLOC4    | 7301.452 | -0.36114 | 0.110255 | -3.27548 | 0.001055 | 0.003329 | 8499.372 | 7972.506 | 8170.669 | 6136.117 | 5700.73  | 7329.315 |
| 13917 | ATP5MC1   | 2991.272 | -0.36123 | 0.178165 | -2.02751 | 0.04261  | 0.081396 | 3848.813 | 2246.031 | 3998.368 | 2587.035 | 2534.846 | 2732.539 |
| 9306  | RIMS3     | 2487.566 | -0.36138 | 0.119225 | -3.03105 | 0.002437 | 0.006959 | 2845.411 | 2691.624 | 2865.718 | 2053.557 | 1946.591 | 2522.498 |
| 15357 | VANGL2    | 355.2888 | -0.36138 | 0.204423 | -1.7678  | 0.077094 | 0.13346  | 325.7939 | 463.6578 | 406.3071 | 283.4801 | 387.179  | 265.3146 |
| 11880 | CNTF      | 488.4576 | -0.36138 | 0.148704 | -2.43021 | 0.01509  | 0.033768 | 580.0324 | 584.0884 | 484.229  | 417.4077 | 427.8221 | 437.1661 |
| 7305  | COA5      | 2082.946 | -0.36142 | 0.099484 | -3.63298 | 0.00028  | 0.001019 | 2452.399 | 2252.052 | 2324.439 | 1720.97  | 1901.669 | 1846.147 |
| 11737 | VBP1      | 3833.975 | -0.36143 | 0.146841 | -2.4614  | 0.01384  | 0.031347 | 4829.99  | 3251.626 | 4852.726 | 3319.173 | 3510.281 | 3240.054 |
| 22393 | LOC119621 | 21.93281 | -0.36152 | 0.548721 | -0.65885 | 0.509993 | 0.605464 | 22.76763 | 29.01283 | 22.95914 | 15.62489 | 17.11289 | 24.11951 |
| 10672 | ALG5      | 528.7067 | -0.36174 | 0.134025 | -2.69906 | 0.006954 | 0.017322 | 596.295  | 616.3857 | 572.5869 | 446.4254 | 464.187  | 476.3603 |
| 8818  | FBXL19    | 1328.539 | -0.36192 | 0.114231 | -3.16828 | 0.001533 | 0.004623 | 1531.394 | 1417.249 | 1541.045 | 1118.296 | 1090.946 | 1272.304 |
| 7491  | MTREX     | 5158.119 | -0.36201 | 0.101561 | -3.56449 | 0.000365 | 0.001294 | 5700.58  | 6336.292 | 5373.829 | 4274.523 | 4470.741 | 4792.747 |
| 9689  | LOC103231 | 1556.962 | -0.36218 | 0.123444 | -2.93395 | 0.003347 | 0.009183 | 1635.475 | 1982.726 | 1638.447 | 1401.776 | 1249.241 | 1434.106 |
| 12007 | LOC103224 | 7054.215 | -0.3623  | 0.150661 | -2.40472 | 0.016185 | 0.035836 | 7044.412 | 10251.38 | 6509.958 | 6078.082 | 6205.56  | 6235.898 |
| 16759 | LOC103218 | 133.0155 | -0.36233 | 0.236576 | -1.53155 | 0.125632 | 0.199292 | 146.9054 | 146.159  | 157.2353 | 122.767  | 98.39909 | 126.6274 |
| 22296 | LOC119620 | 23.54395 | -0.36233 | 0.536714 | -0.6751  | 0.499615 | 0.595724 | 22.76763 | 24.63353 | 32.00364 | 26.78552 | 14.97377 | 20.09959 |
| 5631  | RPL29     | 13306.63 | -0.36258 | 0.0832   | -4.35786 | 1.31E-05 | 6.20E-05 | 15040.73 | 14446.2  | 15422.97 | 12133.84 | 11153.32 | 11642.69 |
| 5549  | SP3       | 8290.697 | -0.36259 | 0.082552 | -4.39225 | 1.12E-05 | 5.37E-05 | 9205.169 | 9731.34  | 9046.595 | 7095.932 | 7298.646 | 7366.5   |
| 9877  | CNKSR2    | 1648.751 | -0.36259 | 0.125585 | -2.88723 | 0.003887 | 0.010461 | 1750.939 | 2150.234 | 1664.189 | 1453.115 | 1394.7   | 1479.33  |
| 15951 | PJVK      | 203.3742 | -0.36266 | 0.216397 | -1.67591 | 0.093756 | 0.156259 | 259.1173 | 220.0595 | 203.8493 | 185.2665 | 203.2155 | 148.737  |
| 24834 | LOC103220 | 4.783978 | -0.36278 | 1.314946 | -0.27589 | 0.782632 | 0.83778  | 3.123296 | 3.284471 | 4.174388 | 6.696381 | 6.417332 | 0        |
| 19468 | LOC103231 | 158.8564 | -0.3628  | 0.328057 | -1.10589 | 0.268773 | 0.367029 | 112.2119 | 275.8956 | 146.7993 | 133.9276 | 164.7115 | 119.5926 |
| 7988  | AGPAT1    | 1629.469 | -0.3631  | 0.106308 | -3.41559 | 0.000636 | 0.002118 | 1723.293 | 1984.368 | 1792.204 | 1441.954 | 1413.952 | 1421.041 |
| 7146  | CSE1L     | 10787.38 | -0.36323 | 0.098645 | -3.68218 | 0.000231 | 0.00086  | 11714.49 | 13448.27 | 11254.85 | 9419.576 | 9080.525 | 9806.59  |
| 21748 | LOC119621 | 29.80593 | -0.36326 | 0.4718   | -0.76994 | 0.441333 | 0.539499 | 29.27266 | 33.93953 | 36.87376 | 24.5534  | 32.08666 | 22.10955 |
| 21554 | GNAO1     | 48.19291 | -0.36331 | 0.456324 | -0.79616 | 0.425937 | 0.525366 | 47.16151 | 55.83601 | 57.7457  | 35.71403 | 70.59065 | 22.10955 |
| 24199 | GLIPR1    | 6.487242 | -0.36335 | 0.971733 | -0.37392 | 0.708464 | 0.778318 | 7.047123 | 9.306001 | 5.565851 | 6.696381 | 4.278221 | 6.029877 |
| 9078  | PPP3CA    | 4122.135 | -0.36359 | 0.117684 | -3.08952 | 0.002005 | 0.005871 | 4368.674 | 5306.61  | 4246.744 | 3386.137 | 3493.168 | 3931.48  |
| 7742  | GTF2H1    | 3564.347 | -0.3636  | 0.104458 | -3.48085 | 0.0005   | 0.001716 | 3731.18  | 4441.699 | 3857.83  | 3064.71  | 3270.7   | 3019.963 |
| 12725 | LOC103221 | 624.4462 | -0.36376 | 0.161499 | -2.25239 | 0.024298 | 0.050763 | 784.399  | 603.7952 | 722.8649 | 587.0494 | 455.6306 | 592.9379 |
| 25323 | LOC119615 | 1.982114 | -0.36378 | 1.854156 | -0.1962  | 0.844457 | 0.886541 | 0.542086 | 3.284471 | 2.782925 | 0        | 4.278221 | 1.004979 |
| 9379  | SMCHD1    | 10013.34 | -0.36378 | 0.120747 | -3.01274 | 0.002589 | 0.007339 | 10340.3  | 13411.59 | 10057.49 | 8484.315 | 8676.233 | 9110.139 |
| 10905 | RBM27     | 5275.378 | -0.36383 | 0.137288 | -2.65013 | 0.008046 | 0.019615 | 5217.039 | 7378.564 | 5215.202 | 4723.181 | 4479.298 | 4638.985 |
| 9212  | THAP7     | 1458.657 | -0.36407 | 0.119277 | -3.05232 | 0.002271 | 0.006553 | 1652.821 | 1566.145 | 1709.412 | 1374.99  | 1105.92  | 1342.653 |
| 9859  | USPL1     | 1390.772 | -0.36422 | 0.125985 | -2.89096 | 0.003841 | 0.010356 | 1447.371 | 1773.614 | 1479.821 | 1158.474 | 1165.815 | 1319.538 |
| 7751  | KIAA0586  | 2537.775 | -0.36426 | 0.104738 | -3.47782 | 0.000506 | 0.001734 | 2797.708 | 3112.036 | 2661.868 | 2095.967 | 2271.736 | 2287.333 |
| 8233  | ERCC3     | 2427.975 | -0.36426 | 0.109182 | -3.33631 | 0.000849 | 0.002741 | 2709.348 | 2953.287 | 2542.202 | 1997.754 | 2057.824 | 2307.433 |
| 8176  | EPM2AIP1  | 1176.14  | -0.36429 | 0.10861  | -3.35406 | 0.000796 | 0.002589 | 1354.674 | 1333.495 | 1284.32  | 1071.421 | 964.7389 | 1048.194 |
| 22556 | LOC119621 | 19.43549 | -0.36432 | 0.577038 | -0.63136 | 0.527808 | 0.622086 | 22.76763 | 18.06459 | 25.04633 | 13.39276 | 19.252   | 18.08963 |
| 8355  | CD9       | 9208.684 | -0.36444 | 0.110573 | -3.29591 | 0.000981 | 0.003122 | 11423.93 | 9016.967 | 10661.39 | 7872.712 | 7664.434 | 8612.674 |
| 9142  | CCNI      | 3924.311 | -0.3645  | 0.118808 | -3.068   | 0.002155 | 0.006267 | 3921.995 | 5167.568 | 4163.257 | 3399.529 | 3418.299 | 3475.219 |
| 23479 | ENO3      | 13.91749 | -0.36456 | 0.747378 | -0.48779 | 0.625701 | 0.708506 | 14.09425 | 21.34906 | 12.52316 | 11.16063 | 4.278221 | 20.09959 |
| 9819  | ERI3      | 2221.167 | -0.36457 | 0.125693 | -2.90048 | 0.003726 | 0.010087 | 2752.715 | 2091.113 | 2658.39  | 1995.522 | 1875.472 | 1976.795 |
| 24977 | LOC103234 | 3.237431 | -0.36466 | 1.45785  | -0.25014 | 0.802482 | 0.854145 | 1.626259 | 6.02153  | 3.478657 | 0        | 4.278221 | 4.019918 |
| 6761  | AP4E1     | 3067.791 | -0.36469 | 0.095182 | -3.83155 | 0.000127 | 0.000501 | 3499.168 | 3485.918 | 3381.95  | 2499.982 | 2684.584 | 2855.147 |
| 24961 | LOC119615 | 3.136431 | -0.36473 | 1.44103  | -0.2531  | 0.800189 | 0.85225  | 5.420864 | 2.737059 | 3.478657 | 2.232127 | 0        | 6.029877 |
| 10922 | BCL2L12   | 885.7854 | -0.36475 | 0.137819 | -2.64657 | 0.008131 | 0.019792 | 1080.92  | 885.7123 | 1028.987 | 792.4051 | 684.5154 | 842.1728 |
| 19771 | LOC103218 | 63.58929 | -0.36476 | 0.344886 | -1.05763 | 0.290223 | 0.390247 | 70.47123 | 68.42648 | 74.44326 | 49.10679 | 74.86887 | 44.2191  |
| 9647  | FXYD6     | 869.5892 | -0.36488 | 0.123787 | -2.94764 | 0.003202 | 0.008824 | 970.3346 | 1014.902 | 951.0648 | 834.8155 | 686.6545 | 759.7645 |
| 20194 | LOC119621 | 61.80288 | -0.36506 | 0.365883 | -0.99776 | 0.318396 | 0.419162 | 54.75072 | 92.5126  | 60.52863 | 58.0353  | 57.75599 | 47.23404 |
| 7687  | NSMCE3    | 1317.578 | -0.3652  | 0.104431 | -3.49703 | 0.00047  | 0.001627 | 1537.899 | 1465.421 | 1449.904 | 1142.849 | 1114.477 | 1194.921 |
| 10799 | CCNJ      | 1082.185 | -0.36524 | 0.136743 | -2.67098 | 0.007563 | 0.018619 | 1138.381 | 1421.628 | 1095.777 | 886.1544 | 990.4082 | 960.7604 |
| 13101 | POLRMT    | 1976.52  | -0.36544 | 0.167042 | -2.18772 | 0.02869  | 0.058218 | 2493.055 | 1701.356 | 2486.544 | 1816.951 | 1407.535 | 1953.68  |
| 12849 | NDRG3     | 416.2922 | -0.36552 | 0.16402  | -2.2285  | 0.025847 | 0.053474 | 529.0763 | 403.9899 | 474.4888 | 359.3724 | 352.9533 | 377.8723 |
| 7713  | ZNF768    | 1988.291 | -0.36555 | 0.104782 | -3.48868 | 0.000485 | 0.001673 | 2268.089 | 2321.026 | 2128.242 | 1845.969 | 1593.637 | 1772.784 |
| 23327 | LOC119621 | 12.18609 | -0.36599 | 0.718015 | -0.50972 | 0.610249 | 0.69547  | 15.17842 | 10.94824 | 15.30609 | 8.928508 | 10.69555 | 12.05975 |
| 11987 | FAM172A   | 496.2835 | -0.36631 | 0.152065 | -2.4089  | 0.016    | 0.035486 | 519.3187 | 632.2606 | 527.3644 | 406.2471 | 434.2395 | 458.2706 |
| 6932  | TRIM4     | 2358.18  | -0.36658 | 0.0974   |          |          |          |          |          |          |          |          |          |



|       |           |          |          |          |          |          |          |          |          |          |          |          |          |
|-------|-----------|----------|----------|----------|----------|----------|----------|----------|----------|----------|----------|----------|----------|
| 9446  | POLA2     | 1936.384 | -0.36699 | 0.1224   | -2.99828 | 0.002715 | 0.007641 | 2024.693 | 2521.926 | 1998.14  | 1616.06  | 1736.958 | 1720.525 |
| 14047 | LOC103216 | 317.6389 | -0.36707 | 0.183026 | -2.00556 | 0.044903 | 0.084982 | 308.9892 | 408.3692 | 356.2145 | 249.9982 | 305.8928 | 276.3694 |
| 8863  | CHSY1     | 2975.466 | -0.3671  | 0.116396 | -3.15391 | 0.001611 | 0.004832 | 3193.431 | 3828.051 | 3037.563 | 2587.035 | 2462.116 | 2744.599 |
| 18149 | LOC119624 | 113.8197 | -0.36716 | 0.279694 | -1.31273 | 0.189274 | 0.277252 | 107.3331 | 164.2235 | 112.7085 | 104.91   | 96.25998 | 97.48301 |
| 7831  | WDR5      | 2187.388 | -0.36725 | 0.106191 | -3.45836 | 0.000543 | 0.001845 | 2605.809 | 2327.595 | 2466.368 | 1843.737 | 1807.549 | 2073.273 |
| 7903  | MAPK8     | 1721.02  | -0.36725 | 0.106834 | -3.4376  | 0.000587 | 0.001974 | 1896.76  | 2093.303 | 1829.774 | 1479.9   | 1454.595 | 1571.788 |
| 23289 | LOC119615 | 15.0293  | -0.36727 | 0.712663 | -0.51535 | 0.060307 | 0.692115 | 26.02015 | 9.306001 | 16.00182 | 8.928508 | 12.83466 | 17.08465 |
| 23799 | LOC103226 | 10.38067 | -0.36742 | 0.840945 | -0.43691 | 0.662174 | 0.739748 | 9.757555 | 15.87494 | 9.044508 | 4.464254 | 17.11289 | 6.029877 |
| 8536  | MFSD4B    | 1295.131 | -0.36747 | 0.113262 | -3.24442 | 0.001177 | 0.003665 | 1529.768 | 1481.296 | 1371.287 | 1107.135 | 1065.277 | 1216.025 |
| 13147 | LOC103214 | 306.676  | -0.36752 | 0.168473 | -2.18149 | 0.029147 | 0.05894  | 325.2518 | 379.9038 | 331.8639 | 261.1589 | 269.5279 | 272.3494 |
| 23926 | PDE3B     | 9.18606  | -0.36753 | 0.876719 | -0.41921 | 0.675065 | 0.750088 | 10.29964 | 8.211177 | 11.82743 | 8.928508 | 12.83466 | 3.014938 |
| 13160 | PNN       | 5553.124 | -0.36763 | 0.168744 | -2.17862 | 0.02936  | 0.059312 | 5124.342 | 8472.293 | 5174.85  | 4716.484 | 4761.66  | 5069.116 |
| 10760 | DNAJC21   | 3112.631 | -0.36773 | 0.13734  | -2.67755 | 0.007416 | 0.018324 | 3121.875 | 4317.437 | 3080.699 | 2698.642 | 2797.957 | 2659.176 |
| 9027  | UBE2O     | 2931.055 | -0.36857 | 0.118599 | -3.10772 | 0.001885 | 0.005553 | 3457.427 | 3257.648 | 3205.234 | 2426.322 | 2276.014 | 2963.684 |
| 10614 | TRIT1     | 970.0898 | -0.36862 | 0.135643 | -2.71759 | 0.006576 | 0.016471 | 1238.125 | 947.0224 | 1096.473 | 857.1368 | 806.4447 | 875.3371 |
| 10748 | UTP14A    | 3078.455 | -0.36871 | 0.137576 | -2.68008 | 0.007361 | 0.018206 | 3108.865 | 4267.075 | 3034.085 | 2580.339 | 2716.671 | 2763.694 |
| 19032 | LOC103241 | 234.46   | -0.36876 | 0.312695 | -1.1793  | 0.238279 | 0.332841 | 158.8313 | 416.5804 | 215.6767 | 229.9091 | 213.9111 | 171.8515 |
| 8521  | MYO1B     | 12766.77 | -0.36902 | 0.113547 | -3.24993 | 0.001154 | 0.003602 | 13439.95 | 16691.68 | 13044.27 | 10834.74 | 10753.31 | 11836.65 |
| 10804 | DYNC2I2   | 1526.637 | -0.36911 | 0.138254 | -2.66976 | 0.00759  | 0.018678 | 1882.124 | 1432.577 | 1852.733 | 1321.419 | 1210.737 | 1460.235 |
| 6930  | NUP62     | 4334.383 | -0.36919 | 0.098088 | -3.76391 | 0.000167 | 0.000642 | 4903.171 | 5075.055 | 4687.838 | 3658.456 | 3557.341 | 4124.436 |
| 15916 | PEMT      | 199.4605 | -0.3692  | 0.219499 | -1.68202 | 0.092565 | 0.154614 | 235.2655 | 184.4778 | 256.7249 | 176.338  | 154.016  | 189.9411 |
| 24730 | LOC119621 | 4.107068 | -0.36929 | 1.25537  | -0.29417 | 0.76863  | 0.826285 | 3.794605 | 7.663765 | 2.782925 | 2.232127 | 2.139111 | 6.029877 |
| 11272 | ENGASE    | 619.0119 | -0.36933 | 0.144023 | -2.56439 | 0.010336 | 0.024377 | 720.4328 | 665.1054 | 714.5161 | 495.5322 | 498.4128 | 620.0723 |
| 7171  | SMAD4     | 5008.085 | -0.3694  | 0.100544 | -3.67407 | 0.000239 | 0.000885 | 5384.544 | 6274.434 | 5279.21  | 4381.665 | 4284.639 | 4444.019 |
| 6814  | ERBB2     | 4415.772 | -0.36941 | 0.09693  | -3.81116 | 0.000138 | 0.00054  | 5169.878 | 4751.535 | 5019.006 | 3895.062 | 3548.785 | 4110.366 |
| 25533 | LOC119621 | 1.254429 | -0.36943 | 2.303851 | -0.16035 | 0.872603 | 0.908556 | 1.626259 | 2.189647 | 0.695731 | 0        | 0        | 3.014938 |
| 8149  | CABIN1    | 4128.505 | -0.36946 | 0.109796 | -3.36502 | 0.000765 | 0.002497 | 4883.114 | 4528.738 | 4561.215 | 3383.905 | 3317.761 | 4096.296 |
| 6995  | FBXW11    | 6693.394 | -0.36962 | 0.098942 | -3.73576 | 0.000187 | 0.000711 | 7677.569 | 7788.028 | 7181.339 | 5732.102 | 5375.585 | 6405.739 |
| 24522 | TRNAV-CA  | 4.83209  | -0.3697  | 1.129    | -0.32746 | 0.743322 | 0.805856 | 4.336691 | 7.116354 | 4.87012  | 2.232127 | 6.417332 | 4.019918 |
| 9999  | DTD1      | 1082.442 | -0.36979 | 0.129215 | -2.86182 | 0.004212 | 0.011199 | 1166.57  | 1380.573 | 1117.345 | 888.3865 | 934.7914 | 1006.989 |
| 21066 | LOC103221 | 35.66804 | -0.3698  | 0.4248   | -0.87052 | 0.384018 | 0.484579 | 39.03022 | 42.15071 | 39.65669 | 26.78552 | 34.22577 | 32.15934 |
| 9003  | SHQ1      | 1017.156 | -0.36992 | 0.118737 | -3.11541 | 0.001837 | 0.005424 | 1179.038 | 1157.776 | 1109.692 | 821.4227 | 864.2007 | 970.8102 |
| 8824  | TGFBR1    | 1504.991 | -0.36994 | 0.116851 | -3.16596 | 0.001546 | 0.004657 | 1666.373 | 1796.058 | 1634.273 | 1162.938 | 1341.222 | 1429.081 |
| 17682 | LOC103236 | 140.2903 | -0.36995 | 0.266421 | -1.38858 | 0.164959 | 0.284017 | 180.5148 | 147.2538 | 150.278  | 116.0706 | 89.84265 | 157.7818 |
| 21878 | LOC119621 | 37.52174 | -0.37005 | 0.494538 | -0.74828 | 0.454292 | 0.552032 | 41.74065 | 30.65506 | 52.87558 | 35.71403 | 47.06043 | 17.08465 |
| 17333 | LOC119620 | 171.21   | -0.37015 | 0.256436 | -1.44344 | 0.148898 | 0.228376 | 211.4137 | 147.8012 | 223.3298 | 122.767  | 139.0422 | 182.9063 |
| 20614 | LOC119621 | 49.62781 | -0.37047 | 0.396378 | -0.93465 | 0.34997  | 0.451342 | 66.67662 | 43.24553 | 57.7457  | 55.80317 | 32.08666 | 42.20914 |
| 24738 | LOC119624 | 3.659323 | -0.37064 | 1.267937 | -0.29231 | 0.770046 | 0.82754  | 4.878777 | 3.284471 | 4.174388 | 4.464254 | 2.139111 | 3.014938 |
| 16016 | ARMC6     | 970.4596 | -0.37071 | 0.223005 | -1.66235 | 0.096443 | 0.160085 | 1361.721 | 684.8122 | 1241.185 | 752.2268 | 748.6887 | 1034.124 |
| 6698  | GOT2      | 7274.924 | -0.37078 | 0.096151 | -3.85625 | 0.000115 | 0.000457 | 8244.592 | 8521.56  | 7855.503 | 6305.759 | 5844.05  | 6878.079 |
| 7451  | AKAP17A   | 8767.115 | -0.37093 | 0.103568 | -3.58148 | 0.000342 | 0.001219 | 9212.758 | 11027.61 | 9427.16  | 7761.106 | 7155.325 | 8018.731 |
| 25286 | TRNAY-GU  | 2.43836  | -0.37137 | 1.84947  | -0.2008  | 0.840858 | 0.884055 | 2.710432 | 3.831883 | 1.391463 | 6.696381 | 0        | 0        |
| 10086 | CDK5RAP2  | 3103.326 | -0.37148 | 0.130765 | -2.84084 | 0.004499 | 0.01186  | 3320.821 | 4044.826 | 3141.923 | 2707.57  | 2380.83  | 3023.983 |
| 20038 | LOC103244 | 51.91538 | -0.37154 | 0.363695 | -1.02158 | 0.30698  | 0.407279 | 60.17159 | 51.45671 | 63.31155 | 53.57105 | 42.78221 | 40.19918 |
| 17244 | LOC119626 | 205.6109 | -0.37161 | 0.254754 | -1.4587  | 0.144648 | 0.223003 | 180.5148 | 313.1196 | 200.3706 | 180.8023 | 201.0764 | 157.7818 |
| 13468 | LOC103236 | 5683.158 | -0.37162 | 0.175851 | -2.11325 | 0.034579 | 0.068257 | 7806.044 | 4302.109 | 7127.768 | 4792.377 | 4723.156 | 5347.496 |
| 9816  | MEX3D     | 693.5758 | -0.37171 | 0.128125 | -2.90114 | 0.003718 | 0.01007  | 738.8637 | 765.2817 | 844.6179 | 582.5851 | 616.0639 | 614.0425 |
| 8671  | LOC103238 | 2162.255 | -0.37174 | 0.115775 | -3.21087 | 0.001323 | 0.004057 | 2623.698 | 2115.747 | 2579.772 | 1915.165 | 1824.661 | 1914.486 |
| 11771 | NPHP4     | 945.6586 | -0.37181 | 0.151478 | -2.45452 | 0.014107 | 0.031862 | 1145.971 | 958.5181 | 1104.126 | 756.691  | 718.7412 | 989.9048 |
| 6596  | XPO4      | 4289.255 | -0.37208 | 0.095313 | -3.9038  | 9.47E-05 | 0.000382 | 4838.663 | 4908.642 | 4779.675 | 3582.564 | 3548.785 | 4075.102 |
| 7642  | UTP20     | 6278.345 | -0.3721  | 0.105967 | -3.51146 | 0.000446 | 0.00155  | 7089.406 | 8328.871 | 6852.258 | 5482.104 | 5632.278 | 6085.151 |
| 9640  | ZBTB17    | 951.432  | -0.37214 | 0.126152 | -2.94993 | 0.003179 | 0.008766 | 1121.035 | 1036.798 | 1068.643 | 821.4227 | 740.1323 | 920.5612 |
| 5764  | WASHC4    | 21333.83 | -0.37217 | 0.086704 | -4.29241 | 1.77E-05 | 8.15E-05 | 23836.08 | 25722.88 | 22655.1  | 18218.62 | 18445.55 | 19124.76 |
| 9451  | NOD1      | 778.4827 | -0.37235 | 0.124228 | -2.99734 | 0.002723 | 0.00766  | 924.2573 | 856.6995 | 858.5325 | 645.0847 | 656.707  | 729.6151 |
| 13310 | PCBD2     | 784.7141 | -0.37238 | 0.173621 | -2.14482 | 0.031967 | 0.063851 | 955.6983 | 657.989  | 1042.206 | 714.2806 | 673.8199 | 664.2914 |
| 8810  | RWDD4     | 1875.684 | -0.3727  | 0.117503 | -3.17182 | 0.001515 | 0.004571 | 1953.679 | 2413.539 | 1981.443 | 1627.221 | 1664.228 | 1613.997 |
| 10044 | ZDHHC9    | 2299.17  | -0.37273 | 0.130692 | -2.85193 | 0.004345 | 0.011502 | 2397.106 | 3033.756 | 2356.442 | 2035.7   | 1803.27  | 2168.746 |
| 23195 | LOC119621 | 16.93375 | -0.37289 | 0.703225 | -0.53025 | 0.595936 | 0.683033 | 17.34676 | 31.20247 | 8.348776 | 13.39276 | 19.252   | 12.05975 |
| 22461 | CALML4    | 20.21304 | -0.37291 | 0.575789 | -0.64765 | 0.517213 | 0.612177 | 23.30971 | 17.51718 | 27.13352 | 17.85702 | 21.39111 | 14.06971 |
| 9442  | DHX30     | 4402.197 | -0.37293 | 0.124353 | -2.99894 | 0.002709 | 0.007629 | 5444.173 | 4423.087 | 5045.444 | 3691.938 | 3409.742 | 4398.795 |
| 7682  | VDAC1     | 7780.268 | -0.37293 | 0.106622 | -3.49768 | 0.000469 | 0.001624 | 8608.874 | 9746.667 | 7991.171 | 6426.294 | 6586.322 | 7322.28  |
| 10199 | SUPT6H    | 6809.235 | -0.37304 | 0.132444 | -2.81654 | 0.004854 | 0.012653 | 6891.002 | 9313.665 | 6853.65  | 5720.941 | 5598.053 | 6478.098 |
| 14885 | LOC103218 | 416.0236 | -0.37306 | 0.200828 | -1.85763 | 0.063222 | 0.112916 | 545.3389 | 338.3005 | 523.8857 | 368.301  | 378.6226 | 341.693  |
| 23513 | LOC119626 | 12.57343 | -0.37323 | 0.775202 | -0.48146 | 0.630186 | 0.712521 | 20.59928 | 6.02153  | 16.00182 | 8.928508 | 12.83466 | 11.05477 |
| 9311  | NONO      | 19527.51 | -0.3733  | 0.123156 | -3.03111 | 0.002437 | 0.006959 | 19924.93 | 26499.11 | 19697.55 | 17006.58 | 16300.02 | 17736.88 |
| 14391 | ATP5F1E   | 8125.266 | -0.37334 | 0.191919 | -1.94527 | 0.051742 | 0.095585 | 10876.96 | 5653.669 | 10983.51 | 7075.843 | 6665.469 | 7496.142 |
| 11805 | CPT1B     | 1053.701 | -0.37346 | 0.152573 | -2.44776 | 0.014375 | 0.032372 | 1301.007 | 1024.755 | 1248.142 | 752.2268 | 951.9042 | 1044.174 |
| 9007  | SPTBN1    | 30402.16 | -0.37351 | 0.119967 | -3.11341 | 0.001849 | 0.005459 | 31200.87 | 40240.24 | 31511.76 | 25843.57 | 24648.97 | 28967.53 |
| 6600  | FAM168B   | 7878.373 | -0.37356 | 0.095729 | -3.90223 | 9.53E-05 | 0.000384 | 8926.536 | 9202.54  | 8558.192 | 6604.864 | 6455.836 | 7522.271 |
| 18856 | LOC103226 | 73.02886 | -0.37378 | 0.308639 | -1.21106 | 0.225873 | 0.318436 | 85.10756 | 82.65918 | 80.00911 | 51.33892 | 72.72976 | 66.32864 |
| 1308  |           |          |          |          |          |          |          |          |          |          |          |          |          |



|       |          |          |          |          |          |          |          |          |          |          |          |          |          |
|-------|----------|----------|----------|----------|----------|----------|----------|----------|----------|----------|----------|----------|----------|
| 19265 | SPATA45  | 62.91969 | -0.37411 | 0.327593 | -1.14201 | 0.253452 | 0.349754 | 63.42411 | 73.35318 | 75.83472 | 58.0353  | 55.61688 | 51.25395 |
| 13932 | CUNH12or | 252.2964 | -0.37421 | 0.184741 | -2.0256  | 0.042805 | 0.081681 | 305.1946 | 277.5378 | 274.1182 | 223.2127 | 192.52   | 241.1951 |
| 16844 | LOC11962 | 118.0579 | -0.37428 | 0.24686  | -1.51617 | 0.129476 | 0.204352 | 128.4745 | 129.1892 | 141.9292 | 93.74933 | 115.512  | 99.49297 |
| 10351 | FBXO27   | 841.8912 | -0.37433 | 0.134837 | -2.77616 | 0.005501 | 0.014127 | 933.4727 | 1021.47  | 903.0593 | 685.263  | 675.959  | 832.123  |
| 11059 | PRR3     | 1068.532 | -0.37438 | 0.143255 | -2.61338 | 0.008965 | 0.021551 | 1131.876 | 1419.986 | 1066.556 | 857.1368 | 1016.078 | 919.5562 |
| 8786  | ADAL     | 881.2294 | -0.37463 | 0.117873 | -3.17829 | 0.001481 | 0.004483 | 1050.021 | 956.8759 | 979.5898 | 727.6734 | 789.3318 | 783.884  |
| 8318  | DCLRE1A  | 1153.081 | -0.37464 | 0.113243 | -3.30827 | 0.000939 | 0.003    | 1340.58  | 1330.758 | 1237.01  | 1035.707 | 926.2349 | 1048.194 |
| 11232 | CPPED1   | 511.0905 | -0.37482 | 0.145615 | -2.57403 | 0.010052 | 0.023793 | 581.1166 | 532.0843 | 621.9838 | 428.5684 | 421.4048 | 481.3852 |
| 9111  | SART3    | 3346.816 | -0.37494 | 0.121731 | -3.08009 | 0.002069 | 0.006038 | 3648.241 | 4190.985 | 3507.182 | 2689.713 | 2710.253 | 3334.522 |
| 12030 | LOC10323 | 1066.193 | -0.37511 | 0.156222 | -2.40112 | 0.016345 | 0.036121 | 1125.913 | 1488.96  | 997.6788 | 895.0829 | 934.7914 | 954.7305 |
| 8917  | H2AFV    | 5053.969 | -0.3752  | 0.119504 | -3.13963 | 0.001692 | 0.005043 | 6333.737 | 4899.883 | 5894.932 | 4263.363 | 4122.066 | 4809.832 |
| 21531 | LOC10323 | 35.97549 | -0.37529 | 0.469095 | -0.80002 | 0.423698 | 0.523153 | 31.44101 | 44.34036 | 44.52681 | 37.94616 | 38.50399 | 19.09461 |
| 7230  | POLR1A   | 6578.47  | -0.37545 | 0.102642 | -3.65788 | 0.000254 | 0.000935 | 7497.054 | 7499.542 | 7303.092 | 5482.104 | 5245.099 | 6443.928 |
| 6558  | SNRPD3   | 3200.209 | -0.37568 | 0.095926 | -3.91638 | 8.99E-05 | 0.000364 | 3423.818 | 3859.253 | 3556.579 | 2843.73  | 2838.6   | 2679.275 |
| 10468 | SMC3     | 4075.694 | -0.37569 | 0.136518 | -2.75193 | 0.005925 | 0.015046 | 4103.594 | 5659.691 | 4049.157 | 3470.957 | 3416.16  | 3754.603 |
| 24380 | LOC11962 | 5.735737 | -0.3757  | 1.074377 | -0.34969 | 0.72657  | 0.792313 | 10.29964 | 4.379295 | 4.87012  | 6.696381 | 2.139111 | 6.029877 |
| 20763 | LOC11962 | 39.7936  | -0.37573 | 0.413189 | -0.90933 | 0.363175 | 0.46501  | 42.82482 | 52.55153 | 38.96096 | 40.17829 | 32.08666 | 32.15934 |
| 13118 | LOC10324 | 275.3377 | -0.37597 | 0.172211 | -2.18444 | 0.02893  | 0.058629 | 307.363  | 292.8653 | 332.5596 | 247.7661 | 235.3022 | 236.1702 |
| 6231  | CREBZF   | 3466.03  | -0.376   | 0.092573 | -4.06172 | 4.87E-05 | 0.000208 | 3833.635 | 4028.404 | 3889.138 | 2830.337 | 3043.954 | 3170.71  |
| 10792 | SLF1     | 620.9058 | -0.37612 | 0.140765 | -2.672   | 0.00754  | 0.018572 | 740.49   | 735.7215 | 629.6369 | 491.0679 | 564.7252 | 563.7935 |
| 7294  | ITGA2    | 3032.818 | -0.37623 | 0.103461 | -3.6364  | 0.000276 | 0.001008 | 3275.286 | 3748.676 | 3258.806 | 2549.089 | 2571.211 | 2793.843 |
| 20097 | LOC10324 | 48.79807 | -0.37641 | 0.371492 | -1.01324 | 0.310944 | 0.411328 | 54.20864 | 50.36189 | 61.22436 | 35.71403 | 47.06043 | 44.2191  |
| 8087  | GUCD1    | 2809.816 | -0.37658 | 0.111225 | -3.38579 | 0.00071  | 0.002333 | 3389.124 | 2945.076 | 3195.494 | 2475.429 | 2192.588 | 2661.186 |
| 20018 | CAPN3    | 53.05574 | -0.37666 | 0.367425 | -1.02514 | 0.305299 | 0.405454 | 50.95612 | 65.68942 | 61.92009 | 49.10679 | 53.47777 | 37.18424 |
| 19291 | LOC11961 | 73.05011 | -0.37667 | 0.331307 | -1.13693 | 0.255567 | 0.352198 | 94.32303 | 62.40495 | 89.74935 | 66.96381 | 70.59065 | 54.26889 |
| 10021 | LOC10323 | 1431.846 | -0.3767  | 0.131893 | -2.85613 | 0.004288 | 0.011377 | 1439.239 | 1897.877 | 1517.39  | 1196.42  | 1257.797 | 1282.354 |
| 5939  | CD2BP2   | 3787.305 | -0.37684 | 0.08992  | -4.19081 | 2.78E-05 | 0.000124 | 4386.021 | 4257.769 | 4199.435 | 3252.209 | 3155.188 | 3473.209 |
| 19064 | LOC10324 | 65.72866 | -0.37733 | 0.321151 | -1.17492 | 0.240026 | 0.334719 | 78.06044 | 70.61612 | 73.05179 | 62.49956 | 59.8951  | 50.24897 |
| 7864  | LOC10321 | 1240.058 | -0.37741 | 0.109364 | -3.45096 | 0.000559 | 0.001888 | 1394.788 | 1401.374 | 1401.899 | 1136.153 | 1110.198 | 995.9347 |
| 6850  | RTRAF    | 5609.734 | -0.37748 | 0.099394 | -3.79781 | 0.000146 | 0.000567 | 5930.425 | 6999.207 | 6085.562 | 4870.501 | 5048.301 | 4724.408 |
| 15159 | ALG14    | 197.1767 | -0.37749 | 0.209228 | -1.80418 | 0.071203 | 0.124872 | 245.5651 | 209.6587 | 211.5023 | 158.481  | 201.0764 | 156.7768 |
| 11656 | LOC10323 | 600.5628 | -0.37773 | 0.152319 | -2.47984 | 0.013144 | 0.029979 | 636.4094 | 781.7041 | 617.1137 | 571.4245 | 479.1608 | 517.5644 |
| 22326 | LOC10322 | 33.66619 | -0.37779 | 0.56326  | -0.67073 | 0.502393 | 0.598232 | 27.6464  | 61.31012 | 23.65487 | 37.94616 | 36.36488 | 15.07469 |
| 6776  | USP34    | 8167.859 | -0.37784 | 0.098768 | -3.82553 | 0.00013  | 0.000512 | 9126.024 | 9965.085 | 8609.676 | 6727.631 | 6932.858 | 7645.884 |
| 25557 | LOC11962 | 1.227605 | -0.37799 | 2.41257  | -0.15667 | 0.875501 | 0.910717 | 0        | 2.737059 | 1.391463 | 2.232127 | 0        | 1.004979 |
| 14105 | KCNK1    | 270.8644 | -0.37801 | 0.189658 | -1.9931  | 0.04625  | 0.087172 | 311.1576 | 303.8136 | 307.5133 | 187.4987 | 243.8586 | 271.3445 |
| 24687 | LOC11962 | 4.039348 | -0.37808 | 1.254874 | -0.30129 | 0.763193 | 0.82187  | 4.336691 | 2.189647 | 6.957314 | 4.464254 | 4.278221 | 2.009959 |
| 21681 | LOC10323 | 29.14757 | -0.3781  | 0.484804 | -0.7799  | 0.435451 | 0.533946 | 27.6464  | 39.41365 | 31.30791 | 22.32127 | 32.08666 | 22.10955 |
| 5021  | AMD1     | 9157.241 | -0.37814 | 0.080836 | -4.67787 | 2.90E-06 | 1.53E-05 | 10536.53 | 10211.42 | 10298.22 | 8073.603 | 8160.707 | 7662.968 |
| 17878 | DUS3L    | 152.2382 | -0.37845 | 0.27739  | -1.36433 | 0.172465 | 0.256459 | 196.2353 | 122.6202 | 200.3706 | 111.6063 | 119.7902 | 162.8067 |
| 6241  | RAP2C    | 2571.453 | -0.37849 | 0.093344 | -4.05476 | 5.02E-05 | 0.000214 | 2812.886 | 3051.821 | 2854.586 | 2205.341 | 2293.127 | 2210.955 |
| 18042 | LOC10321 | 101.5293 | -0.37852 | 0.283331 | -1.33595 | 0.181564 | 0.267536 | 137.1479 | 94.70224 | 112.0128 | 80.35657 | 100.5382 | 84.41828 |
| 7218  | WDR1     | 13155.39 | -0.37853 | 0.103389 | -3.66122 | 0.000251 | 0.000924 | 14547.43 | 16225.29 | 13847.14 | 11598.13 | 10400.36 | 12314.01 |
| 21527 | CEACAM1  | 34.7296  | -0.37868 | 0.473046 | -0.80051 | 0.423415 | 0.522901 | 39.03022 | 44.34036 | 32.69937 | 35.71403 | 38.50399 | 18.08963 |
| 16896 | FADS2    | 141.7467 | -0.37869 | 0.25125  | -1.50723 | 0.131753 | 0.207294 | 154.4946 | 145.0641 | 178.1072 | 136.1597 | 141.1813 | 95.47305 |
| 13821 | LOC11962 | 297.0203 | -0.37873 | 0.185261 | -2.0443  | 0.040924 | 0.078671 | 387.5918 | 306.5506 | 311.6877 | 243.3018 | 288.7799 | 244.21   |
| 19597 | LOC11962 | 67.22225 | -0.37882 | 0.348612 | -1.08667 | 0.277184 | 0.376031 | 94.32303 | 54.74118 | 79.31338 | 58.0353  | 55.61688 | 61.30375 |
| 11386 | JTB      | 2115.547 | -0.37898 | 0.149207 | -2.53998 | 0.011086 | 0.025884 | 2705.553 | 1815.765 | 2654.215 | 1859.362 | 1835.357 | 1823.033 |
| 24348 | CUNH19or | 6.856329 | -0.37899 | 1.069427 | -0.35439 | 0.72305  | 0.789481 | 7.589209 | 10.94824 | 4.87012  | 0        | 10.69555 | 7.034856 |
| 7849  | UHRF1BP1 | 3658.513 | -0.37922 | 0.109792 | -3.45395 | 0.000552 | 0.001871 | 4053.18  | 4496.441 | 3867.571 | 3080.335 | 2939.138 | 3514.413 |
| 6226  | MECP2    | 4520.079 | -0.37924 | 0.093304 | -4.06452 | 4.81E-05 | 0.000206 | 4929.733 | 5394.743 | 5012.745 | 3950.865 | 3704.94  | 4127.451 |
| 13981 | CUNH19or | 350.526  | -0.3794  | 0.188263 | -2.01525 | 0.043879 | 0.083435 | 454.8105 | 313.1196 | 422.3089 | 296.8729 | 299.4755 | 316.5685 |
| 7140  | SF3B2    | 9392.746 | -0.37946 | 0.10301  | -3.68366 | 0.00023  | 0.000856 | 10033.48 | 11910.04 | 9923.217 | 8024.496 | 7867.649 | 8597.599 |
| 5818  | ETF1     | 10308.72 | -0.37952 | 0.088999 | -4.26433 | 2.01E-05 | 9.16E-05 | 11636.97 | 12372.6  | 10965.42 | 8747.706 | 8785.328 | 9344.299 |
| 14108 | GRWD1    | 1181.538 | -0.37954 | 0.190527 | -1.99204 | 0.046366 | 0.087372 | 1625.175 | 914.1777 | 1470.776 | 1080.349 | 896.2874 | 1102.462 |
| 8371  | LOC10324 | 874.0554 | -0.37965 | 0.115314 | -3.29228 | 0.000994 | 0.003156 | 1014.786 | 980.962  | 967.0666 | 749.9947 | 797.8883 | 733.635  |
| 8500  | DNTTIP2  | 4127.497 | -0.3797  | 0.116601 | -3.25636 | 0.001129 | 0.003529 | 4144.25  | 5424.851 | 4433.896 | 3564.707 | 3572.315 | 3624.961 |
| 7750  | PNPT1    | 3209.077 | -0.37972 | 0.109179 | -3.47793 | 0.000505 | 0.001733 | 3488.868 | 4096.283 | 3300.55  | 2825.873 | 2770.148 | 2772.738 |
| 12526 | LOC10322 | 1058.598 | -0.3798  | 0.165391 | -2.29636 | 0.021655 | 0.045961 | 952.9878 | 1496.076 | 1140.304 | 912.9399 | 983.9909 | 865.2873 |
| 19767 | UNC79    | 84.78642 | -0.37993 | 0.359009 | -1.05828 | 0.289928 | 0.389929 | 127.9324 | 82.11177 | 75.13899 | 75.89232 | 98.39909 | 49.24399 |
| 10790 | TMCO4    | 603.1506 | -0.37998 | 0.142174 | -2.67266 | 0.007525 | 0.018541 | 723.6853 | 667.8424 | 660.2491 | 504.4607 | 472.7435 | 589.9229 |
| 8245  | KLHL12   | 2809.839 | -0.38021 | 0.114106 | -3.33207 | 0.000862 | 0.002779 | 3328.41  | 3040.873 | 3174.622 | 2254.448 | 2273.875 | 2786.808 |
| 6642  | EXOC2    | 4720.314 | -0.38028 | 0.097986 | -3.88094 | 0.000104 | 0.000416 | 5652.335 | 5147.313 | 5224.943 | 3903.99  | 3940.242 | 4453.064 |
| 6878  | CDC14B   | 1743.577 | -0.38043 | 0.100462 | -3.7868  | 0.000153 | 0.00059  | 1937.417 | 2001.338 | 1982.834 | 1426.329 | 1516.629 | 1596.912 |
| 8254  | METAP2   | 7001.463 | -0.38064 | 0.11438  | -3.32789 | 0.000875 | 0.002818 | 7329.55  | 9252.354 | 7177.861 | 6033.439 | 6042.988 | 6172.584 |
| 11103 | LOC10323 | 442.4242 | -0.38095 | 0.146283 | -2.60417 | 0.00921  | 0.022052 | 515.5241 | 523.3257 | 461.2699 | 381.6937 | 397.8746 | 374.8573 |
| 24079 | LOC11961 | 6.530599 | -0.38095 | 0.968643 | -0.39328 | 0.694113 | 0.766353 | 5.96295  | 6.568942 | 9.740239 | 4.464254 | 6.417332 | 6.029877 |
| 22056 | LOC11961 | 36.951   | -0.38106 | 0.532653 | -0.71541 | 0.474358 | 0.571764 | 59.6295  | 18.06459 | 47.30973 | 26.78552 | 42.78221 | 27.13445 |
| 7337  | CFAP20   | 1619.015 | -0.38117 | 0.105296 | -3.61996 | 0.000295 | 0.001068 | 1843.094 | 1939.48  | 1709.412 | 1455.347 | 1398.978 | 1367.777 |
| 10940 | CHAF1B   | 1651.496 | -0.3814  | 0.144408 | -2.6411  | 0.008264 | 0.020081 | 1636.017 | 2297.487 | 1673.234 | 1374.99  | 1443.9   | 1483.35  |
| 14657 | FXYD5    | 2201.792 | -0.38142 | 0.201167 | -1.89605 | 0.057954 | 0.105117 |          |          |          |          |          |          |



|       |           |          |          |          |          |          |            |          |          |          |          |          |          |
|-------|-----------|----------|----------|----------|----------|----------|------------|----------|----------|----------|----------|----------|----------|
| 16682 | LOC119620 | 129.4668 | -0.38176 | 0.247083 | -1.54507 | 0.122328 | 0.194947   | 140.9425 | 163.1287 | 133.5804 | 131.6955 | 106.9555 | 100.4979 |
| 16952 | LOC103232 | 116.0838 | -0.38181 | 0.254673 | -1.4992  | 0.133822 | 0.209866   | 148.5317 | 113.8617 | 131.4932 | 100.4457 | 102.6773 | 99.49297 |
| 12728 | HOXB3     | 349.5427 | -0.38185 | 0.169557 | -2.25203 | 0.024321 | 0.050799   | 350.7299 | 444.4984 | 389.6096 | 316.962  | 308.0319 | 287.4241 |
| 6072  | MSL3      | 2596.592 | -0.38187 | 0.092343 | -4.13531 | 3.54E-05 | 0.000155   | 2935.398 | 3063.864 | 2814.929 | 2281.234 | 2228.953 | 2255.174 |
| 9013  | MPDU1     | 2925.499 | -0.38188 | 0.122708 | -3.11212 | 0.001858 | 0.005479   | 3653.662 | 2803.296 | 3478.657 | 2511.143 | 2395.804 | 2710.43  |
| 7847  | ATP11B    | 5719.422 | -0.38197 | 0.110586 | -3.45406 | 0.000552 | 0.001871   | 5964.034 | 7380.206 | 6075.822 | 4935.233 | 4725.295 | 5235.943 |
| 7858  | NUFIP2    | 25911.15 | -0.38207 | 0.110695 | -3.45156 | 0.000557 | 0.001886   | 27381.87 | 33875.49 | 26713.3  | 21861.45 | 21816.79 | 23818.01 |
| 6895  | DCPS      | 1759.032 | -0.38222 | 0.101178 | -3.77769 | 0.000158 | 0.00061    | 1957.474 | 2098.229 | 1919.523 | 1473.204 | 1520.908 | 1584.853 |
| 5164  | DARS1     | 4394.383 | -0.38226 | 0.083168 | -4.59618 | 4.30E-06 | 2.22E-05   | 5029.477 | 4971.047 | 4916.038 | 3837.026 | 3878.208 | 3734.504 |
| 12233 | SHLD3     | 319.7864 | -0.38236 | 0.162015 | -2.36001 | 0.018274 | 0.039711   | 370.245  | 341.0376 | 372.912  | 285.7123 | 284.5017 | 264.3096 |
| 11312 | LOC103225 | 5491.792 | -0.38251 | 0.149687 | -2.55538 | 0.010607 | 0.024929   | 5621.978 | 7824.704 | 5204.071 | 4332.558 | 4678.235 | 5289.207 |
| 6764  | NAAT5     | 4541.198 | -0.38262 | 0.099876 | -3.83092 | 0.000128 | 0.000502   | 5250.106 | 5428.683 | 4746.975 | 3799.08  | 3788.365 | 4233.979 |
| 11021 | CNOT6     | 1800.865 | -0.38273 | 0.145826 | -2.62457 | 0.008676 | 0.02093    | 1859.356 | 2453.5   | 1807.51  | 1424.097 | 1490.96  | 1769.769 |
| 21957 | LOC103225 | 25.66131 | -0.38325 | 0.521568 | -0.73479 | 0.462464 | 0.559941   | 26.56223 | 25.72836 | 34.09084 | 31.24978 | 19.252   | 17.08465 |
| 19025 | LOC103236 | 72.6785  | -0.38325 | 0.324809 | -1.17993 | 0.238028 | 0.332597   | 81.85504 | 71.71095 | 91.83654 | 60.26743 | 79.14709 | 51.25395 |
| 8400  | USP10     | 3644.397 | -0.38325 | 0.116751 | -3.28268 | 0.001028 | 0.003254   | 3862.365 | 4722.522 | 3796.606 | 3095.96  | 2984.059 | 3404.87  |
| 21826 | LOC119625 | 25.59142 | -0.38333 | 0.507135 | -0.75587 | 0.449726 | 0.547742   | 32.52518 | 25.72836 | 28.52499 | 17.85702 | 27.80844 | 21.10457 |
| 24491 | LOC103214 | 6.043646 | -0.38339 | 1.153416 | -0.33239 | 0.739592 | 0.802833   | 10.29964 | 3.284471 | 6.957314 | 0        | 10.69555 | 5.024897 |
| 6648  | FAM220A   | 1901.827 | -0.38347 | 0.098854 | -3.87916 | 0.000105 | 0.000419   | 2194.366 | 2162.277 | 2108.066 | 1609.364 | 1587.22  | 1749.669 |
| 10341 | EEF1AKMT  | 1027.249 | -0.38361 | 0.138043 | -2.77892 | 0.005454 | 0.014021   | 1301.007 | 981.5094 | 1204.311 | 939.7255 | 887.7309 | 849.2077 |
| 22279 | LOC103225 | 20.07918 | -0.38364 | 0.566713 | -0.67696 | 0.498431 | 0.59478    | 23.8518  | 20.25424 | 24.3506  | 20.08914 | 12.83466 | 19.09461 |
| 9127  | HDAC5     | 4276.929 | -0.38364 | 0.124836 | -3.07318 | 0.002118 | 0.006169   | 5198.066 | 4210.144 | 5125.453 | 3745.509 | 3242.892 | 4139.51  |
| 14988 | COMMD1    | 671.8365 | -0.38371 | 0.208983 | -1.83608 | 0.066346 | 0.117681   | 873.8432 | 493.7655 | 913.4953 | 589.2815 | 613.9248 | 546.7088 |
| 14365 | FAM155B   | 26.9942  | -0.38373 | 0.196849 | -1.94934 | 0.051255 | 0.094864   | 330.6727 | 462.0156 | 316.5578 | 296.8729 | 284.5017 | 271.3445 |
| 7318  | SNX30     | 1828.427 | -0.3838  | 0.105788 | -3.62802 | 0.000286 | 0.001038   | 2120.1   | 2127.242 | 1969.616 | 1502.221 | 1535.881 | 1715.5   |
| 4555  | TCP1      | 12414.48 | -0.38397 | 0.077264 | -4.96963 | 6.71E-07 | 3.92E-06   | 14221.64 | 13875.25 | 14070.47 | 10953.05 | 10813.2  | 10553.29 |
| 6397  | EMD       | 3845.276 | -0.38399 | 0.096452 | -3.98115 | 6.86E-05 | 0.000285   | 4422.883 | 4504.652 | 4140.297 | 3334.798 | 3112.406 | 3556.622 |
| 7143  | COG6      | 1286.682 | -0.38419 | 0.104322 | -3.68276 | 0.000231 | 0.000859   | 1486.943 | 1414.512 | 1468.689 | 1084.814 | 1163.676 | 1101.457 |
| 7625  | RAE1      | 1857.816 | -0.38434 | 0.109243 | -3.51826 | 0.000434 | 0.001514   | 2232.854 | 1999.148 | 2084.411 | 1638.381 | 1469.569 | 1722.535 |
| 13640 | DGUOK     | 758.4101 | -0.38444 | 0.184733 | -2.08107 | 0.037427 | 0.072948   | 1000.149 | 614.1961 | 964.2837 | 660.7096 | 609.6465 | 701.4757 |
| 9412  | PHACTR2   | 1659.743 | -0.38445 | 0.127941 | -3.00487 | 0.002657 | 0.007505   | 1738.471 | 2203.88  | 1695.497 | 1424.097 | 1467.43  | 1429.081 |
| 6138  | DCUN1D5   | 2606.005 | -0.38447 | 0.093735 | -4.10165 | 4.10E-05 | 0.000178   | 2973.344 | 3040.873 | 2835.801 | 2236.591 | 2361.578 | 2187.84  |
| 7631  | GTPBP1    | 2293.927 | -0.38465 | 0.109438 | -3.51479 | 0.00044  | 0.001533   | 2611.772 | 2579.952 | 2606.905 | 2100.431 | 1736.958 | 2127.542 |
| 20954 | LOC103233 | 43.85663 | -0.38474 | 0.43495  | -0.88456 | 0.376393 | 0.477541   | 59.6295  | 35.03436 | 52.87558 | 42.41041 | 47.06043 | 26.12947 |
| 9034  | CENPS     | 862.0121 | -0.38483 | 0.123963 | -3.10441 | 0.001907 | 0.005611   | 950.2774 | 1067.453 | 909.3209 | 767.8517 | 746.5496 | 730.6201 |
| 7063  | UBLCP1    | 1803.7   | -0.38485 | 0.103834 | -3.70643 | 0.00021  | 0.000791   | 1911.939 | 2123.958 | 2088.586 | 1631.685 | 1578.664 | 1487.37  |
| 15359 | NKX3-1    | 269.9033 | -0.38504 | 0.217855 | -1.76743 | 0.077156 | 0.13355    | 272.6694 | 383.1883 | 262.9865 | 247.7661 | 192.52   | 260.2897 |
| 8461  | PSMD5     | 1826.825 | -0.38506 | 0.117944 | -3.26479 | 0.001095 | 0.003442   | 2255.079 | 1880.907 | 2077.454 | 1555.793 | 1463.152 | 1728.565 |
| 21806 | LOC103224 | 26.77793 | -0.38511 | 0.507382 | -0.75902 | 0.447839 | 0.545987   | 25.47806 | 37.224   | 27.82925 | 20.08914 | 29.94755 | 20.09959 |
| 6302  | VTA1      | 2084.282 | -0.38513 | 0.095684 | -4.02502 | 5.70E-05 | 0.00024    | 2382.47  | 2442.004 | 2259.735 | 1763.38  | 1813.966 | 1844.137 |
| 8543  | CTDSP2    | 6399.668 | -0.38537 | 0.118879 | -3.24166 | 0.001188 | 0.003697   | 7688.953 | 6736.997 | 7333.009 | 5158.445 | 5005.519 | 6475.083 |
| 8267  | RFC3      | 1614.625 | -0.38543 | 0.115967 | -3.32366 | 0.000888 | 0.002857   | 2032.282 | 1659.753 | 1794.987 | 1348.205 | 1454.595 | 1397.926 |
| 6813  | ABCF2     | 5776.453 | -0.38544 | 0.101099 | -3.81249 | 0.000138 | 0.000537   | 6390.114 | 7079.677 | 6167.659 | 4881.662 | 4716.739 | 5422.869 |
| 20952 | LOC119625 | 36.69308 | -0.38562 | 0.435791 | -0.88487 | 0.376225 | 0.477374   | 52.04029 | 36.12918 | 36.17803 | 35.71403 | 29.94755 | 30.14938 |
| 12199 | SH3BGR13  | 1801.7   | -0.38595 | 0.163089 | -2.3665  | 0.017957 | 0.039133   | 1695.646 | 2646.736 | 1783.16  | 1533.471 | 1490.96  | 1660.226 |
| 7060  | TRAF3     | 2296.428 | -0.38613 | 0.104146 | -3.70761 | 0.000209 | 0.000788   | 2694.711 | 2555.866 | 2563.074 | 1839.273 | 1950.869 | 2174.776 |
| 8625  | EEF1AKMT  | 1084.008 | -0.38617 | 0.119879 | -3.22131 | 0.001276 | 0.003933   | 1237.041 | 1337.327 | 1110.387 | 924.1006 | 945.4869 | 949.7056 |
| 7556  | BRIX1     | 1910.35  | -0.38619 | 0.1091   | -3.53976 | 0.0004   | 0.001409   | 2055.592 | 2392.19  | 2043.363 | 1656.238 | 1702.732 | 1611.987 |
| 8927  | SURF6     | 1030.472 | -0.38625 | 0.123087 | -3.13801 | 0.001701 | 0.005066   | 1214.273 | 1151.207 | 1142.391 | 912.9399 | 787.1927 | 974.8301 |
| 7407  | ZBED5     | 2613.183 | -0.38671 | 0.107471 | -3.59823 | 0.00032  | 0.00115    | 2741.331 | 3263.122 | 2883.807 | 2176.324 | 2224.675 | 2389.841 |
| 12390 | LOC103245 | 354.1706 | -0.38681 | 0.166494 | -2.32327 | 0.020164 | 0.043266   | 431.5008 | 395.7787 | 379.8693 | 265.6231 | 316.5884 | 335.6631 |
| 8207  | CHCHD6    | 986.9377 | -0.3871  | 0.115751 | -3.34428 | 0.000825 | 0.002672   | 1172.533 | 1051.578 | 1132.651 | 881.6902 | 812.8621 | 870.3122 |
| 10317 | CARF      | 627.2768 | -0.38719 | 0.139022 | -2.78512 | 0.005351 | 0.013788   | 720.9749 | 757.0705 | 651.9003 | 520.0856 | 601.0901 | 512.5395 |
| 22241 | CATSPER3  | 23.71211 | -0.38733 | 0.565237 | -0.68526 | 0.493182 | 0.589507   | 31.44101 | 18.612   | 29.91645 | 31.24978 | 14.97377 | 16.07967 |
| 17425 | LOC103225 | 120.9388 | -0.38752 | 0.2721   | -1.4242  | 0.15439  | 0.23555    | 162.0838 | 112.7668 | 135.6676 | 89.28508 | 128.3466 | 97.48301 |
| 23082 | LOC119620 | 12.59994 | -0.38757 | 0.705896 | -0.54905 | 0.58297  | 0.67147    | 11.9259  | 15.32753 | 15.30609 | 11.16063 | 12.83466 | 9.044815 |
| 12082 | DMAC2L    | 443.9164 | -0.38762 | 0.162155 | -2.39044 | 0.016828 | 0.037028   | 576.2378 | 456.5415 | 473.7931 | 410.7114 | 391.4573 | 354.7578 |
| 16698 | APOLD1    | 132.1868 | -0.38762 | 0.251211 | -1.54302 | 0.122826 | 0.195552   | 162.0838 | 147.2538 | 137.7548 | 109.3742 | 141.1813 | 95.47305 |
| 15859 | PRR7      | 163.6988 | -0.38796 | 0.229612 | -1.68962 | 0.0911   | 0.152715   | 192.9827 | 154.9175 | 210.1109 | 145.0883 | 128.3466 | 150.7469 |
| 17945 | LOC119625 | 83.42024 | -0.38802 | 0.287069 | -1.35167 | 0.176481 | 0.261452   | 101.3702 | 94.15483 | 89.05362 | 66.96381 | 70.59065 | 78.3884  |
| 11127 | NHP2      | 3149.966 | -0.3881  | 0.149442 | -2.59695 | 0.009405 | 0.022472   | 4043.964 | 2727.753 | 3944.101 | 2843.73  | 2459.977 | 2880.271 |
| 6394  | TMEM39A   | 1867.92  | -0.38826 | 0.097516 | -3.98147 | 6.85E-05 | 0.000285   | 2172.14  | 2041.299 | 2143.548 | 1589.274 | 1582.942 | 1678.316 |
| 8025  | ERAP1     | 3655.817 | -0.38871 | 0.114186 | -3.40418 | 0.000664 | 0.002198   | 3980.54  | 4705.552 | 3754.166 | 3093.728 | 3016.146 | 3384.771 |
| 20051 | USH1G     | 54.8991  | -0.38876 | 0.380975 | -1.02043 | 0.307523 | 0.407735   | 79.6867  | 47.07742 | 60.52863 | 51.33892 | 38.50399 | 52.25893 |
| 5807  | IARS2     | 6680.878 | -0.3889  | 0.091072 | -4.27027 | 1.95E-05 | 8.94E-05   | 7809.838 | 7473.266 | 7452.674 | 5691.924 | 5439.758 | 6217.808 |
| 21939 | PAQR9     | 28.2113  | -0.38894 | 0.527389 | -0.73748 | 0.46083  | 0.558438   | 34.69353 | 20.25424 | 40.35242 | 33.4819  | 21.39111 | 19.09461 |
| 10072 | GPATCH3   | 531.6241 | -0.3891  | 0.13675  | -2.84533 | 0.004437 | 0.01171    | 590.3321 | 642.1141 | 574.6741 | 479.9073 | 453.4915 | 449.2258 |
| 8354  | FBXW2     | 4460.031 | -0.38923 | 0.118087 | -3.29613 | 0.00098  | 0.003119   | 4743.798 | 5817.345 | 4618.265 | 3636.135 | 3749.861 | 4194.784 |
| 22543 | LOC119625 | 18.30768 | -0.38942 | 0.614199 | -0.63403 | 0.526062 | 0.620386   | 26.02015 | 15.32753 | 20.87194 | 11.16063 | 21.39111 | 15.07469 |
| 10357 | ZNF680    | 741.3829 | -0.38942 | 0.140343 | -2.7748  | 0.005524 | 0.014178   | 743.7425 | 932.7897 | 842.5307 | 651.7811 | 684.5154 | 592.9379 |
| 8454  | CDC42BPA  | 7303.746 | -0.3895  | 0.119207 | -3.26741 | 0.001085 | 0.003413</ |          |          |          |          |          |          |



|       |           |          |          |          |          |          |          |          |          |          |          |          |          |
|-------|-----------|----------|----------|----------|----------|----------|----------|----------|----------|----------|----------|----------|----------|
| 17433 | IL17D     | 92.77943 | -0.38992 | 0.274279 | -1.42163 | 0.155135 | 0.236578 | 116.5486 | 101.8186 | 97.40239 | 80.35657 | 79.14709 | 81.40334 |
| 9031  | GXYLT1    | 3222.213 | -0.39005 | 0.125629 | -3.10481 | 0.001904 | 0.005604 | 3363.104 | 4348.639 | 3251.848 | 2861.587 | 2776.566 | 2731.534 |
| 8344  | USP25     | 4042.443 | -0.39006 | 0.118231 | -3.29916 | 0.00097  | 0.00309  | 4330.728 | 5341.644 | 4083.943 | 3383.905 | 3615.097 | 3499.339 |
| 12991 | SGSM1     | 295.5781 | -0.39017 | 0.176956 | -2.20488 | 0.027462 | 0.0562   | 358.8612 | 308.1929 | 338.8212 | 285.7123 | 224.6066 | 257.2747 |
| 25211 | LOC119621 | 2.076414 | -0.39027 | 1.831662 | -0.21307 | 0.831274 | 0.876579 | 5.420864 | 1.094824 | 0.695731 | 2.232127 | 0        | 3.014938 |
| 17273 | LOC10324  | 109.4369 | -0.39037 | 0.268441 | -1.4542  | 0.14589  | 0.224541 | 124.1378 | 105.1031 | 144.0164 | 100.4457 | 83.42532 | 99.49297 |
| 6129  | NAE1      | 4615.887 | -0.39039 | 0.095109 | -4.10464 | 4.05E-05 | 0.000176 | 5385.086 | 4914.663 | 5405.137 | 3968.722 | 4243.996 | 3777.718 |
| 7860  | CASP2     | 1208.445 | -0.39049 | 0.113138 | -3.45144 | 0.000558 | 0.001886 | 1406.172 | 1332.4   | 1378.94  | 946.4218 | 1080.251 | 1106.482 |
| 7513  | RNF167    | 1765.678 | -0.3907  | 0.109927 | -3.55413 | 0.000379 | 0.001342 | 1869.656 | 2215.376 | 1924.393 | 1513.382 | 1548.716 | 1522.544 |
| 7539  | BANF1     | 2022.641 | -0.39073 | 0.110179 | -3.54632 | 0.000391 | 0.001378 | 2218.217 | 2542.728 | 2125.459 | 1761.148 | 1681.341 | 1806.953 |
| 8603  | ESPL1     | 2180.28  | -0.39097 | 0.121134 | -3.22764 | 0.001248 | 0.003857 | 2591.715 | 2356.06  | 2482.37  | 1872.755 | 1632.141 | 2146.636 |
| 10013 | TCTN3     | 878.0131 | -0.39109 | 0.136842 | -2.85798 | 0.004263 | 0.01132  | 1059.779 | 916.9148 | 1019.246 | 705.3521 | 699.4892 | 867.2973 |
| 6265  | CBL       | 5753.371 | -0.39116 | 0.096733 | -4.04371 | 5.26E-05 | 0.000223 | 6393.367 | 6916.548 | 6283.846 | 4776.752 | 4750.965 | 5398.75  |
| 18300 | LOC10323  | 82.15889 | -0.39122 | 0.304978 | -1.28277 | 0.199571 | 0.289924 | 98.11763 | 95.79707 | 84.1835  | 91.51721 | 62.03421 | 61.30375 |
| 8960  | MDM4      | 1539.033 | -0.39122 | 0.125044 | -3.12867 | 0.001756 | 0.00521  | 1607.286 | 2013.381 | 1618.967 | 1272.312 | 1377.587 | 1344.663 |
| 23609 | LOC11962  | 12.17005 | -0.39142 | 0.837541 | -0.46734 | 0.640253 | 0.720943 | 12.46799 | 15.32753 | 12.52316 | 17.85702 | 12.83466 | 2.009959 |
| 9342  | DCBLD1    | 986.6019 | -0.39146 | 0.129595 | -3.02063 | 0.002523 | 0.007178 | 1047.853 | 1276.564 | 1033.857 | 841.5119 | 870.618  | 849.2077 |
| 7466  | LOC10323  | 6031.785 | -0.39153 | 0.10954  | -3.57433 | 0.000351 | 0.00125  | 6290.37  | 7769.416 | 6479.346 | 5258.891 | 4913.537 | 5479.148 |
| 7478  | EIF2B2    | 1228.517 | -0.39155 | 0.10967  | -3.57026 | 0.000357 | 0.001268 | 1380.694 | 1404.659 | 1400.507 | 1100.439 | 973.2954 | 1111.507 |
| 8009  | MTHFD2L   | 973.9594 | -0.3917  | 0.114872 | -3.40985 | 0.00065  | 0.002158 | 1073.331 | 1103.035 | 1136.825 | 825.887  | 902.7047 | 801.9736 |
| 6803  | ARHGAP23  | 3641.384 | -0.39206 | 0.102727 | -3.81653 | 0.000135 | 0.000529 | 3947.473 | 4414.329 | 4043.591 | 3180.781 | 2881.382 | 3380.751 |
| 7408  | GNA12     | 5340.633 | -0.3921  | 0.108978 | -3.598   | 0.000321 | 0.001151 | 6441.612 | 5751.109 | 6002.77  | 4450.861 | 4192.657 | 5204.789 |
| 8589  | EXOSC3    | 867.1726 | -0.39211 | 0.1213   | -3.23256 | 0.001227 | 0.003797 | 997.981  | 999.0266 | 958.0221 | 790.173  | 675.959  | 781.874  |
| 23499 | FOXN1     | 9.831882 | -0.3922  | 0.809211 | -0.48467 | 0.627908 | 0.710368 | 9.215468 | 12.04306 | 12.52316 | 4.464254 | 10.69555 | 10.04979 |
| 7085  | DDX3X     | 29206.5  | -0.39227 | 0.105973 | -3.70159 | 0.000214 | 0.000804 | 31179.72 | 37686.57 | 30596.87 | 24457.42 | 24471.43 | 26847.02 |
| 10145 | ZBTB10    | 2207.491 | -0.39229 | 0.138778 | -2.82672 | 0.004703 | 0.012323 | 2271.342 | 3044.705 | 2204.077 | 1854.898 | 1826.801 | 2043.123 |
| 24315 | LOC10321  | 6.413034 | -0.39235 | 1.091701 | -0.35939 | 0.719303 | 0.786455 | 8.673382 | 4.379295 | 8.348776 | 2.232127 | 12.83466 | 2.009959 |
| 8004  | SKIV2L    | 3265.695 | -0.39241 | 0.115053 | -3.4107  | 0.000648 | 0.002152 | 4017.944 | 3337.022 | 3773.647 | 2758.909 | 2586.185 | 3120.461 |
| 20085 | LOC11962  | 73.09454 | -0.39248 | 0.386615 | -1.01517 | 0.310027 | 0.410359 | 108.9594 | 50.36189 | 90.44508 | 73.66019 | 42.78221 | 72.35852 |
| 7090  | SUMO3     | 4934.595 | -0.39255 | 0.106064 | -3.70101 | 0.000215 | 0.000805 | 5090.191 | 6305.637 | 5407.224 | 4296.844 | 4353.09  | 4154.585 |
| 4726  | HNRNPK    | 34192.46 | -0.39258 | 0.080668 | -4.86659 | 1.14E-06 | 6.39E-06 | 39148.94 | 38562.43 | 38744.58 | 29185.06 | 28328.24 | 31185.52 |
| 5493  | AIMP1     | 3030.226 | -0.39274 | 0.089016 | -4.41199 | 1.02E-05 | 4.96E-05 | 3495.373 | 3435.009 | 3386.125 | 2720.963 | 2603.298 | 2540.588 |
| 17047 | LOC10322  | 107.9647 | -0.39285 | 0.264216 | -1.48687 | 0.13705  | 0.213704 | 131.1849 | 114.4091 | 123.1445 | 102.6778 | 74.86887 | 101.5029 |
| 19793 | LOC11961  | 60.99533 | -0.39288 | 0.372677 | -1.05421 | 0.291787 | 0.391914 | 50.95612 | 87.58589 | 68.18167 | 66.96381 | 47.06043 | 45.22408 |
| 21542 | LOC11962  | 34.68902 | -0.39288 | 0.492143 | -0.79831 | 0.424691 | 0.524112 | 42.28274 | 35.58177 | 41.74388 | 33.4819  | 12.83466 | 42.20914 |
| 19062 | LOC11962  | 75.92952 | -0.39296 | 0.334391 | -1.17515 | 0.239934 | 0.334626 | 68.30288 | 96.34448 | 91.83654 | 78.12444 | 72.72976 | 48.23901 |
| 9231  | ITPR2     | 2512.824 | -0.39315 | 0.129021 | -3.04716 | 0.00231  | 0.006653 | 2667.607 | 3378.078 | 2516.46  | 2098.199 | 2109.163 | 2307.433 |
| 15643 | LOC11962  | 170.8466 | -0.39317 | 0.227757 | -1.72627 | 0.084298 | 0.143264 | 227.6763 | 186.12   | 169.7585 | 145.0883 | 132.6249 | 163.8117 |
| 10117 | RPAP1     | 2015.309 | -0.3932  | 0.138774 | -2.83341 | 0.004605 | 0.012102 | 2487.634 | 2018.855 | 2366.878 | 1656.238 | 1508.073 | 2054.178 |
| 12708 | CREB3L4   | 514.3455 | -0.39322 | 0.174263 | -2.25647 | 0.024041 | 0.050286 | 653.2141 | 537.5584 | 567.0211 | 435.2648 | 359.3706 | 533.6441 |
| 7763  | WDR70     | 1676.398 | -0.39324 | 0.113168 | -3.47484 | 0.000511 | 0.001751 | 1780.212 | 2126.147 | 1804.727 | 1435.258 | 1441.761 | 1470.285 |
| 8363  | MAFF      | 2165.065 | -0.39349 | 0.119461 | -3.29387 | 0.000988 | 0.003141 | 2457.278 | 2720.637 | 2202.686 | 1839.273 | 1728.401 | 2042.118 |
| 21776 | LOC11962  | 727.9964 | -0.39349 | 0.515276 | -0.76366 | 0.445073 | 0.543362 | 1048.395 | 345.9643 | 1086.037 | 700.8879 | 496.2737 | 690.4209 |
| 22490 | LOC10322  | 21.73129 | -0.39353 | 0.614472 | -0.64044 | 0.521887 | 0.616964 | 28.18849 | 13.13788 | 33.39511 | 11.16063 | 21.39111 | 23.11453 |
| 9669  | PACB1     | 1085.622 | -0.39369 | 0.13391  | -2.93992 | 0.003283 | 0.009027 | 1325.401 | 1082.781 | 1294.756 | 955.3503 | 836.3923 | 1019.049 |
| 13358 | LOC10323  | 241.5895 | -0.39383 | 0.18442  | -2.13549 | 0.032721 | 0.065121 | 266.1644 | 257.2836 | 300.556  | 196.4272 | 216.0502 | 213.0556 |
| 22926 | RNF186    | 13.79519 | -0.39386 | 0.684253 | -0.57561 | 0.564882 | 0.655037 | 14.63633 | 16.42235 | 15.30609 | 13.39276 | 14.97377 | 8.039836 |
| 14176 | LOC10321  | 821.2714 | -0.39402 | 0.198901 | -1.98097 | 0.047594 | 0.089256 | 1098.809 | 616.3857 | 1082.558 | 705.3521 | 740.1323 | 684.391  |
| 12104 | ATP5PO    | 4619.487 | -0.39404 | 0.165185 | -2.38547 | 0.017057 | 0.037464 | 5740.695 | 3668.207 | 6330.46  | 4109.346 | 3948.798 | 3919.42  |
| 8692  | CUNRSD3   | 923.1854 | -0.39427 | 0.122995 | -3.20558 | 0.001348 | 0.004122 | 1031.59  | 1130.405 | 990.0257 | 772.3159 | 761.5234 | 857.2475 |
| 11544 | TXNH22or  | 459.1274 | -0.39442 | 0.157464 | -2.50484 | 0.012251 | 0.028212 | 570.8169 | 461.4682 | 535.7132 | 374.9973 | 378.6226 | 433.1462 |
| 20395 | LOC11961  | 40.457   | -0.39456 | 0.410001 | -0.96235 | 0.335875 | 0.437815 | 48.78777 | 51.45671 | 37.56949 | 31.24978 | 38.50399 | 35.17428 |
| 5887  | LOC11961  | 8446.063 | -0.39485 | 0.093536 | -4.22138 | 2.43E-05 | 0.00011  | 10058.41 | 9083.752 | 9649.098 | 7254.413 | 6828.041 | 7802.661 |
| 10912 | MED9      | 632.4828 | -0.39486 | 0.149058 | -2.64902 | 0.008073 | 0.019667 | 800.1195 | 641.0192 | 716.6033 | 578.1209 | 479.1608 | 579.8732 |
| 6201  | LTBR      | 2558.224 | -0.39493 | 0.096963 | -4.07298 | 4.64E-05 | 0.000199 | 2823.728 | 2998.175 | 2900.504 | 2077.841 | 2055.685 | 2303.413 |
| 6239  | LRPPRC    | 14677.44 | -0.39512 | 0.097417 | -4.05592 | 4.99E-05 | 0.000213 | 17160.29 | 16854.81 | 16019.91 | 11999.91 | 11946.93 | 14082.78 |
| 6243  | ASS1      | 4677.316 | -0.3952  | 0.097485 | -4.05397 | 5.04E-05 | 0.000214 | 5551.507 | 5228.878 | 5169.98  | 3912.919 | 3794.782 | 4405.83  |
| 7189  | REV1      | 2008.421 | -0.39558 | 0.107801 | -3.66957 | 0.000243 | 0.000898 | 2256.163 | 2486.892 | 2105.283 | 1656.238 | 1754.071 | 1791.878 |
| 11994 | ZNF589    | 730.4381 | -0.39564 | 0.164314 | -2.40782 | 0.016048 | 0.035571 | 719.3486 | 1031.871 | 738.8667 | 642.8526 | 607.5074 | 642.1819 |
| 24746 | LOC11961  | 3.592074 | -0.39578 | 1.362045 | -0.29058 | 0.771375 | 0.828723 | 4.336691 | 5.474118 | 2.087194 | 2.232127 | 6.417332 | 1.004979 |
| 8623  | LOC10322  | 1321.581 | -0.39607 | 0.122906 | -3.22255 | 0.001271 | 0.003917 | 1541.152 | 1337.874 | 1622.446 | 1223.206 | 1146.563 | 1058.243 |
| 10637 | ZNF397    | 725.3162 | -0.39614 | 0.146217 | -2.70924 | 0.006744 | 0.016854 | 804.9983 | 903.2295 | 766.0002 | 694.1915 | 526.2212 | 657.2566 |
| 7963  | SLC2A10   | 1070.62  | -0.39616 | 0.115797 | -3.42118 | 0.000623 | 0.002082 | 1263.603 | 1193.358 | 1195.266 | 973.2074 | 838.5314 | 959.7554 |
| 18457 | STAC3     | 77.71133 | -0.39634 | 0.31578  | -1.25511 | 0.20944  | 0.301672 | 86.19173 | 79.37471 | 97.40239 | 82.5887  | 68.45154 | 52.25893 |
| 7253  | SEC13     | 5507.304 | -0.39639 | 0.108574 | -3.65091 | 0.000261 | 0.000958 | 6685.009 | 5459.338 | 6637.973 | 4636.128 | 4605.505 | 5019.872 |
| 12581 | GJA3      | 479.096  | -0.39646 | 0.173285 | -2.2879  | 0.022143 | 0.04679  | 532.3288 | 607.6271 | 493.2735 | 337.0512 | 496.2737 | 408.0217 |
| 22046 | REP15     | 22.40336 | -0.39664 | 0.553359 | -0.71678 | 0.473508 | 0.570997 | 27.10432 | 21.89647 | 27.13352 | 13.39276 | 27.80844 | 17.08465 |
| 21379 | LOC11962  | 42.04609 | -0.39671 | 0.483623 | -0.82029 | 0.412049 | 0.512387 | 28.18849 | 73.35318 | 41.04815 | 33.4819  | 47.06043 | 29.1444  |
| 20394 | LOC11962  | 44.55418 | -0.39677 | 0.412245 | -0.96246 | 0.335821 | 0.437766 | 63.96619 | 41.6033  | 45.22254 | 46.87467 | 38.50399 | 31.15436 |
| 5557  | CLCN3     | 9626.592 | -0.39711 | 0.09046  | -4.3899  | 1.13E-05 | 5.43E-05 | 11016.82 | 11331.97 | 10488.85 | 7982.086 | 8004.552 | 8935.272 |



|       |           |          |          |          |          |          |          |          |          |          |          |          |          |
|-------|-----------|----------|----------|----------|----------|----------|----------|----------|----------|----------|----------|----------|----------|
| 9777  | PTPN18    | 1340.343 | -0.39783 | 0.136745 | -2.90933 | 0.003622 | 0.009849 | 1411.051 | 1786.752 | 1378.244 | 1089.278 | 1114.477 | 1262.254 |
| 7877  | TAX1BP1   | 3340.392 | -0.39785 | 0.115424 | -3.44688 | 0.000567 | 0.001914 | 3558.255 | 4308.131 | 3532.228 | 2881.676 | 2671.749 | 3090.312 |
| 9072  | LOC103225 | 646.0418 | -0.39785 | 0.128744 | -3.09025 | 0.002    | 0.00586  | 709.5911 | 780.0618 | 715.9076 | 531.2462 | 562.5861 | 576.8582 |
| 22122 | LOC119625 | 377.934  | -0.39791 | 0.564095 | -0.70539 | 0.480569 | 0.577521 | 520.945  | 195.426  | 573.9784 | 330.3548 | 194.6591 | 452.2408 |
| 7055  | LOC119618 | 1149.072 | -0.39805 | 0.107304 | -3.70952 | 0.000208 | 0.000782 | 1357.926 | 1294.629 | 1269.014 | 964.2789 | 992.5473 | 1016.034 |
| 7192  | NDUFAF4   | 1490.624 | -0.39808 | 0.108511 | -3.66857 | 0.000244 | 0.000901 | 1736.303 | 1588.042 | 1760.2   | 1218.741 | 1371.17  | 1269.289 |
| 8637  | PIM1      | 1103.462 | -0.39819 | 0.123731 | -3.21814 | 0.00129  | 0.003971 | 1306.97  | 1256.858 | 1203.615 | 1015.618 | 825.6967 | 1012.014 |
| 12338 | LOC103215 | 286.5826 | -0.39823 | 0.170425 | -2.33668 | 0.019456 | 0.041928 | 317.1205 | 343.7746 | 318.645  | 247.7661 | 228.8848 | 263.3046 |
| 21940 | LOC103225 | 27.75162 | -0.39827 | 0.540164 | -0.73731 | 0.460932 | 0.558491 | 26.56223 | 36.12918 | 33.39511 | 24.5534  | 10.69555 | 35.17428 |
| 11057 | PSD2      | 443.7702 | -0.39835 | 0.152415 | -2.61362 | 0.008959 | 0.02154  | 531.2446 | 454.3518 | 530.843  | 357.1403 | 385.0399 | 404.0017 |
| 23532 | XAF1      | 16.21473 | -0.39842 | 0.833358 | -0.47809 | 0.632587 | 0.714566 | 15.17842 | 17.51718 | 21.56767 | 8.928508 | 32.08666 | 2.009959 |
| 18247 | PYGM      | 70.39591 | -0.39848 | 0.308136 | -1.29319 | 0.195944 | 0.285491 | 79.6867  | 83.2066  | 76.53045 | 62.49956 | 64.17332 | 56.27885 |
| 9614  | WDC1      | 527.3976 | -0.399   | 0.134961 | -2.95638 | 0.003113 | 0.008606 | 591.4162 | 610.9116 | 600.4162 | 439.729  | 438.5177 | 483.3951 |
| 24277 | LOC119615 | 5.680998 | -0.399   | 1.092691 | -0.36516 | 0.714995 | 0.782985 | 8.673382 | 6.02153  | 4.174388 | 8.928508 | 4.278221 | 2.009959 |
| 9349  | ZNFS11    | 1248.031 | -0.39901 | 0.132184 | -3.01863 | 0.002539 | 0.007221 | 1533.02  | 1206.496 | 1522.956 | 1022.314 | 1056.721 | 1146.682 |
| 7688  | GTF2H2    | 1337.484 | -0.39906 | 0.114114 | -3.49701 | 0.000471 | 0.001627 | 1640.353 | 1389.331 | 1536.871 | 1138.385 | 1123.033 | 1196.931 |
| 21699 | LOC103245 | 26.28644 | -0.39914 | 0.513239 | -0.77769 | 0.436754 | 0.535099 | 35.23561 | 21.34906 | 33.39511 | 20.08914 | 23.53022 | 24.11951 |
| 7912  | TCF12     | 6547.283 | -0.39936 | 0.11628  | -3.43451 | 0.000594 | 0.001995 | 6908.349 | 8664.434 | 6773.641 | 5600.407 | 5371.307 | 5965.558 |
| 6594  | LNPK      | 2510.77  | -0.39957 | 0.102347 | -3.90412 | 9.46E-05 | 0.000381 | 2747.294 | 3109.299 | 2712.657 | 2225.431 | 2077.076 | 2192.865 |
| 21482 | LOC103225 | 31.87756 | -0.39973 | 0.495276 | -0.80708 | 0.419622 | 0.519324 | 42.82482 | 25.72836 | 38.96096 | 35.71403 | 29.94755 | 18.08963 |
| 20003 | P2RX1     | 43.51934 | -0.39998 | 0.388506 | -1.02953 | 0.30323  | 0.403008 | 52.04029 | 43.79295 | 52.87558 | 35.71403 | 38.50399 | 38.18922 |
| 9740  | CHPF      | 2028.403 | -0.40004 | 0.137041 | -2.91914 | 0.00351  | 0.00958  | 2497.934 | 1965.756 | 2467.063 | 1694.184 | 1546.577 | 1998.904 |
| 5905  | FAM199X   | 3434.641 | -0.40005 | 0.095034 | -4.20951 | 2.56E-05 | 0.000115 | 4002.766 | 3865.822 | 3859.918 | 2723.195 | 3056.789 | 3099.357 |
| 6495  | TNFAlP1   | 4291.837 | -0.40006 | 0.101492 | -3.94174 | 8.09E-05 | 0.000331 | 5195.356 | 4579.1   | 4882.643 | 3571.403 | 3499.585 | 4022.933 |
| 10186 | NRM       | 628.9935 | -0.40009 | 0.141954 | -2.81845 | 0.004826 | 0.012594 | 686.2813 | 792.6523 | 672.0765 | 515.6213 | 513.3866 | 593.9429 |
| 23062 | LOC103245 | 19.4067  | -0.40011 | 0.724856 | -0.55199 | 0.580956 | 0.669704 | 27.6464  | 13.13788 | 24.3506  | 35.71403 | 8.556443 | 7.034856 |
| 13252 | LOC103245 | 535.8053 | -0.40014 | 0.185465 | -2.15751 | 0.030966 | 0.062122 | 688.4497 | 465.8475 | 672.7722 | 433.0326 | 532.6386 | 422.0914 |
| 5657  | ENOPH1    | 3394.406 | -0.40022 | 0.092148 | -4.34323 | 1.40E-05 | 6.60E-05 | 3969.156 | 3739.37  | 3883.573 | 2765.605 | 2945.555 | 3063.177 |
| 13225 | LOC103245 | 239.4739 | -0.40026 | 0.184974 | -2.16386 | 0.030475 | 0.061261 | 291.6425 | 261.1154 | 264.3779 | 225.4448 | 188.2417 | 206.0208 |
| 23374 | LOC119625 | 11.02988 | -0.40027 | 0.796737 | -0.50238 | 0.6154   | 0.699874 | 16.80468 | 6.568942 | 13.91463 | 11.16063 | 10.69555 | 7.034856 |
| 14741 | LOC119625 | 1191.456 | -0.40048 | 0.212761 | -1.88231 | 0.059794 | 0.107836 | 1663.121 | 825.497  | 1580.006 | 1073.653 | 924.0958 | 1082.363 |
| 8425  | CNIH4     | 2003.517 | -0.40063 | 0.122314 | -3.27541 | 0.001055 | 0.003329 | 2400.358 | 1931.816 | 2507.416 | 1745.523 | 1730.541 | 1705.45  |
| 8596  | CLANE1    | 5938.531 | -0.40068 | 0.124016 | -3.23083 | 0.001234 | 0.003817 | 6199.842 | 8086.915 | 5988.16  | 4982.107 | 5106.057 | 5268.102 |
| 10359 | TRPF2     | 1483.342 | -0.40082 | 0.144484 | -2.77411 | 0.005535 | 0.014206 | 1575.845 | 2054.984 | 1434.598 | 1265.616 | 1236.406 | 1332.603 |
| 8993  | UCHL3     | 1015.514 | -0.4009  | 0.128531 | -3.1191  | 0.001814 | 0.005363 | 1227.284 | 1014.902 | 1221.704 | 910.7078 | 898.4265 | 820.0632 |
| 16253 | RAB31L1   | 116.9835 | -0.40095 | 0.248119 | -1.61594 | 0.106107 | 0.17356  | 125.222  | 147.2538 | 126.6231 | 104.91   | 98.39909 | 99.49297 |
| 7984  | UBE3B     | 2295.114 | -0.40105 | 0.117373 | -3.41689 | 0.000633 | 0.002109 | 2440.473 | 2872.817 | 2530.375 | 1812.487 | 1916.643 | 2197.89  |
| 5819  | PSMB7     | 9671.585 | -0.40106 | 0.094059 | -4.26394 | 2.01E-05 | 9.18E-05 | 11623.42 | 10218.54 | 11186.66 | 8198.602 | 7940.379 | 8861.909 |
| 24716 | LOC119625 | 3.6557   | -0.4011  | 1.356052 | -0.29579 | 0.767392 | 0.825324 | 3.252518 | 4.379295 | 4.87012  | 0        | 6.417332 | 3.014938 |
| 12272 | COX7A2    | 5947.829 | -0.40111 | 0.170661 | -2.35033 | 0.018757 | 0.040633 | 7497.597 | 4621.798 | 8187.367 | 5339.248 | 5230.126 | 4810.837 |
| 27271 | LOC119625 | 0.206303 | -0.40116 | 4.033435 | -0.09946 | 0.920774 | NA       | 0.542086 | 0        | 0.695731 | 0        | 0        | 0        |
| 27287 | LOC119625 | 0.206303 | -0.40116 | 4.033435 | -0.09946 | 0.920774 | NA       | 0.542086 | 0        | 0.695731 | 0        | 0        | 0        |
| 27527 | LOC119618 | 0.206303 | -0.40116 | 4.033435 | -0.09946 | 0.920774 | NA       | 0.542086 | 0        | 0.695731 | 0        | 0        | 0        |
| 27609 | LOC103245 | 0.206303 | -0.40116 | 4.033435 | -0.09946 | 0.920774 | NA       | 0.542086 | 0        | 0.695731 | 0        | 0        | 0        |
| 28294 | HNRNPCL1  | 0.206303 | -0.40116 | 4.033435 | -0.09946 | 0.920774 | NA       | 0.542086 | 0        | 0.695731 | 0        | 0        | 0        |
| 28491 | LOC119625 | 0.206303 | -0.40116 | 4.033435 | -0.09946 | 0.920774 | NA       | 0.542086 | 0        | 0.695731 | 0        | 0        | 0        |
| 28542 | LOC119625 | 0.206303 | -0.40116 | 4.033435 | -0.09946 | 0.920774 | NA       | 0.542086 | 0        | 0.695731 | 0        | 0        | 0        |
| 29434 | LOC103238 | 0.206303 | -0.40116 | 4.033435 | -0.09946 | 0.920774 | NA       | 0.542086 | 0        | 0.695731 | 0        | 0        | 0        |
| 29546 | LOC103235 | 0.206303 | -0.40116 | 4.033435 | -0.09946 | 0.920774 | NA       | 0.542086 | 0        | 0.695731 | 0        | 0        | 0        |
| 6190  | BUD31     | 3761.645 | -0.40135 | 0.098381 | -4.07955 | 4.51E-05 | 0.000194 | 4280.856 | 3992.822 | 4566.085 | 3308.012 | 3366.96  | 3055.138 |
| 22472 | LDHC      | 17.27189 | -0.40135 | 0.623067 | -0.64416 | 0.519474 | 0.614552 | 22.22554 | 13.6853  | 22.95914 | 17.85702 | 12.83466 | 14.06971 |
| 17830 | LOC103245 | 370.9088 | -0.40147 | 0.292564 | -1.37224 | 0.169989 | 0.253458 | 259.1173 | 662.3683 | 342.9956 | 312.4978 | 387.179  | 261.2947 |
| 25289 | LOC103215 | 1.597322 | -0.40174 | 2.004451 | -0.20042 | 0.841149 | 0.884255 | 1.084173 | 2.737059 | 1.391463 | 2.232127 | 2.139111 | 0        |
| 7428  | TENT4A    | 2474.415 | -0.40177 | 0.111938 | -3.58923 | 0.000332 | 0.001187 | 2607.435 | 3160.208 | 2686.219 | 2044.628 | 2104.885 | 2243.114 |
| 19081 | BEND5     | 66.52552 | -0.40203 | 0.34297  | -1.1722  | 0.241115 | 0.335938 | 74.80792 | 77.18507 | 73.05179 | 58.0353  | 74.86887 | 41.20416 |
| 21756 | LOC103225 | 25.2479  | -0.40221 | 0.524006 | -0.76757 | 0.442744 | 0.541016 | 32.52518 | 29.01283 | 25.74206 | 20.08914 | 14.97377 | 29.1444  |
| 9582  | ZKSCAN2   | 1077.521 | -0.40226 | 0.13568  | -2.96475 | 0.003029 | 0.008405 | 1202.348 | 1401.374 | 1079.775 | 861.601  | 924.0958 | 995.9347 |
| 7959  | SAP30L    | 1314.605 | -0.4023  | 0.117551 | -3.42235 | 0.000621 | 0.002074 | 1491.28  | 1606.654 | 1395.637 | 1026.778 | 1174.372 | 1192.911 |
| 12546 | NDUFB6    | 3428.865 | -0.40252 | 0.175501 | -2.29356 | 0.021816 | 0.046228 | 4374.637 | 2628.124 | 4710.797 | 2850.426 | 3003.311 | 3005.894 |
| 5101  | UBE2D3    | 11199.18 | -0.40262 | 0.087003 | -4.62766 | 3.70E-06 | 1.93E-05 | 12201.28 | 13586.76 | 12464.72 | 9991     | 9478.399 | 9472.936 |
| 6721  | HACE1     | 2581.645 | -0.40271 | 0.104647 | -3.8483  | 0.000119 | 0.00047  | 3095.855 | 2837.783 | 2892.155 | 2024.539 | 2239.649 | 2399.891 |
| 17004 | LOC119625 | 99.58989 | -0.40275 | 0.270025 | -1.49151 | 0.135827 | 0.21236  | 117.6327 | 120.978  | 100.1853 | 91.51721 | 89.84265 | 77.38342 |
| 16763 | LOC119615 | 163.4602 | -0.40276 | 0.263099 | -1.53084 | 0.125808 | 0.199511 | 185.9356 | 135.2107 | 237.2444 | 158.481  | 126.2075 | 137.6822 |
| 17638 | HES6      | 91.35329 | -0.40284 | 0.287759 | -1.39994 | 0.161532 | 0.24347  | 103.5385 | 91.96518 | 115.4914 | 73.66019 | 94.12087 | 69.34358 |
| 8783  | CAMK1D    | 797.8985 | -0.40302 | 0.126781 | -3.17882 | 0.001479 | 0.004476 | 878.722  | 965.087  | 885.666  | 698.6557 | 624.6203 | 734.64   |
| 6735  | COX15     | 1799.441 | -0.40303 | 0.104882 | -3.84268 | 0.000122 | 0.00048  | 2136.362 | 1963.019 | 2054.495 | 1488.829 | 1486.682 | 1667.261 |
| 4815  | XRCC6     | 20613.84 | -0.40314 | 0.083901 | -4.80499 | 1.55E-06 | 8.54E-06 | 23398.62 | 24486.83 | 22546.57 | 17412.82 | 17221.98 | 18616.24 |
| 25278 | LOC103235 | 1.596434 | -0.40316 | 1.98742  | -0.20286 | 0.839247 | 0.882707 | 1.626259 | 2.189647 | 1.391463 | 2.232127 | 2.139111 | 0        |
| 23113 | TRNAR-UC  | 14.41635 | -0.40316 | 0.743894 | -0.54197 | 0.587842 | 0.676147 | 15.17842 | 13.13788 | 20.17621 | 24.5534  | 6.417332 | 7.034856 |
| 13546 | LOC119625 | 287.94   | -0.40334 | 0.192162 | -2.09894 | 0.035822 | 0.070303 | 304.6525 | 382.6409 | 296.3816 | 216.5163 | 280.2235 | 247.2249 |
| 11636 | SAMD12    | 420.6335 | -0.40339 | 0.16229  | -2.48563 | 0.012932 | 0.029547 | 415.2382 | 524.4205 | 495.3607 | 366.0688 | 385.0399 | 337.6731 |
| 22488 | PCSK9     | 20.90608 | -0.40355 | 0.630143 | -0.6404  | 0.521911 | 0.616964 | 27.10432 | 15.32753 | 27.82925 | 29.01765 | 17.11289 | 9.044815 |
| 2264  |           |          |          |          |          |          |          |          |          |          |          |          |          |



|       |           |          |          |          |          |          |          |          |          |          |          |          |          |
|-------|-----------|----------|----------|----------|----------|----------|----------|----------|----------|----------|----------|----------|----------|
| 20640 | LOC119621 | 52.54703 | -0.4042  | 0.434859 | -0.92949 | 0.352638 | 0.454209 | 40.11439 | 91.96518 | 46.614   | 51.33892 | 47.06043 | 38.18922 |
| 6691  | NUTF2     | 8233.94  | -0.40432 | 0.104753 | -3.85972 | 0.000114 | 0.000451 | 8486.362 | 10529.47 | 9121.038 | 7334.769 | 7140.351 | 6791.651 |
| 7267  | GNL1      | 3130.063 | -0.40445 | 0.110953 | -3.64524 | 0.000267 | 0.000977 | 3702.992 | 3389.027 | 3615.716 | 2558.018 | 2468.534 | 3046.093 |
| 6942  | USP54     | 2160.71  | -0.40471 | 0.107619 | -3.76062 | 0.000169 | 0.000649 | 2431.799 | 2702.572 | 2249.995 | 1823.648 | 1908.087 | 1848.157 |
| 6420  | UIMC1     | 1477.746 | -0.40474 | 0.101873 | -3.97293 | 7.10E-05 | 0.000294 | 1735.218 | 1695.882 | 1621.75  | 1225.438 | 1287.745 | 1300.443 |
| 7386  | BUB1B     | 4007.659 | -0.40514 | 0.112373 | -3.60534 | 0.000312 | 0.001122 | 4226.647 | 5250.227 | 4224.481 | 3412.922 | 3401.186 | 3530.493 |
| 9745  | BRSK1     | 1004.453 | -0.4053  | 0.13889  | -2.91816 | 0.003521 | 0.009606 | 1187.169 | 1032.419 | 1221.704 | 821.4227 | 770.0798 | 993.9247 |
| 19998 | LOC119621 | 2206.524 | -0.40562 | 0.393755 | -1.03013 | 0.30295  | 0.402736 | 1801.353 | 3877.865 | 1864.56  | 1825.88  | 2019.32  | 1850.167 |
| 11593 | CASC3     | 4386.754 | -0.4057  | 0.162523 | -2.49625 | 0.012552 | 0.028783 | 4167.018 | 6644.485 | 4187.607 | 3689.706 | 3743.444 | 3888.266 |
| 13040 | ACOT8     | 494.8259 | -0.4058  | 0.184666 | -2.1975  | 0.027985 | 0.057052 | 626.6518 | 424.2442 | 642.8558 | 417.4077 | 408.5701 | 449.2258 |
| 10262 | PSMB5     | 5198.246 | -0.40621 | 0.145154 | -2.7985  | 0.005134 | 0.013301 | 6838.962 | 4570.341 | 6370.812 | 4412.915 | 4109.232 | 4887.215 |
| 10360 | YJU2      | 516.2557 | -0.40623 | 0.146442 | -2.77403 | 0.005537 | 0.014208 | 588.7058 | 576.4246 | 605.982  | 419.6399 | 404.2919 | 502.4897 |
| 16304 | LOC119621 | 205.046  | -0.40645 | 0.253075 | -1.60604 | 0.108265 | 0.176529 | 292.1846 | 162.0339 | 248.3761 | 178.5702 | 156.1551 | 192.9561 |
| 8449  | FLAD1     | 1405.565 | -0.40647 | 0.124342 | -3.26896 | 0.001079 | 0.003396 | 1728.713 | 1413.965 | 1668.364 | 1218.741 | 1110.198 | 1293.409 |
| 28252 | LOC119615 | 0.207191 | -0.40676 | 4.032952 | -0.10086 | 0.919662 | NA       | 0        | 0.547412 | 0.695731 | 0        | 0        | 0        |
| 28426 | LOC103231 | 0.207191 | -0.40676 | 4.032952 | -0.10086 | 0.919662 | NA       | 0        | 0.547412 | 0.695731 | 0        | 0        | 0        |
| 28510 | LOC119621 | 0.207191 | -0.40676 | 4.032952 | -0.10086 | 0.919662 | NA       | 0        | 0.547412 | 0.695731 | 0        | 0        | 0        |
| 28731 | LOC119621 | 0.207191 | -0.40676 | 4.032952 | -0.10086 | 0.919662 | NA       | 0        | 0.547412 | 0.695731 | 0        | 0        | 0        |
| 28958 | LILRA5    | 0.207191 | -0.40676 | 4.032952 | -0.10086 | 0.919662 | NA       | 0        | 0.547412 | 0.695731 | 0        | 0        | 0        |
| 29505 | LOC119621 | 0.207191 | -0.40676 | 4.032952 | -0.10086 | 0.919662 | NA       | 0        | 0.547412 | 0.695731 | 0        | 0        | 0        |
| 7766  | PTPRN     | 1019.259 | -0.40684 | 0.117129 | -3.47344 | 0.000514 | 0.001759 | 1153.018 | 1198.284 | 1140.304 | 859.3689 | 812.8621 | 951.7156 |
| 16390 | CCDC173   | 235.436  | -0.40701 | 0.256063 | -1.58948 | 0.111951 | 0.181588 | 218.4608 | 362.3866 | 226.1127 | 151.7846 | 226.7457 | 227.1254 |
| 11475 | SNX11     | 695.6847 | -0.40716 | 0.161392 | -2.52278 | 0.011643 | 0.026988 | 889.0216 | 634.9977 | 858.5325 | 553.5675 | 596.8119 | 641.1769 |
| 7297  | PABIR2    | 1330.365 | -0.40745 | 0.112066 | -3.6358  | 0.000277 | 0.00101  | 1535.731 | 1582.02  | 1438.772 | 1080.349 | 1110.198 | 1235.12  |
| 20810 | LOC103231 | 47.62484 | -0.40756 | 0.451388 | -0.90289 | 0.366582 | 0.468312 | 42.82482 | 84.84883 | 34.78657 | 40.17829 | 44.92132 | 38.18922 |
| 7183  | RARA      | 1847.993 | -0.40762 | 0.111104 | -3.67091 | 0.000242 | 0.000895 | 1979.157 | 2236.177 | 2113.632 | 1535.703 | 1486.682 | 1736.605 |
| 7568  | PCDH7     | 1468.914 | -0.40769 | 0.115316 | -3.53544 | 0.000407 | 0.00143  | 1568.256 | 1860.653 | 1598.791 | 1243.295 | 1229.989 | 1312.503 |
| 7529  | THOC1     | 2203.628 | -0.40804 | 0.114966 | -3.54925 | 0.000386 | 0.001364 | 2301.157 | 2853.11  | 2387.054 | 1879.451 | 1850.331 | 1950.665 |
| 4915  | RBM39     | 12369.24 | -0.40828 | 0.086193 | -4.73678 | 2.17E-06 | 1.17E-05 | 14021.61 | 14966.79 | 13337.87 | 10578.05 | 10396.08 | 10915.08 |
| 16887 | C1QL1     | 99.26124 | -0.40835 | 0.270662 | -1.50872 | 0.13137  | 0.206822 | 108.4173 | 128.0944 | 102.9682 | 91.51721 | 79.14709 | 85.42325 |
| 11511 | RBBP6     | 4165.003 | -0.40841 | 0.162581 | -2.51202 | 0.012004 | 0.027724 | 3926.332 | 6288.667 | 4037.329 | 3372.744 | 3702.801 | 3662.145 |
| 10075 | CFAP44    | 849.4463 | -0.40863 | 0.143706 | -2.84348 | 0.004462 | 0.011775 | 957.3245 | 1090.444 | 855.0539 | 703.12   | 821.4185 | 669.3163 |
| 7689  | KTF2E1    | 3388.553 | -0.40865 | 0.116876 | -3.49644 | 0.000472 | 0.00163  | 3626.558 | 4481.113 | 3487.006 | 2986.586 | 2855.713 | 2894.341 |
| 5877  | GIF7      | 2225.558 | -0.40871 | 0.096684 | -4.22724 | 2.37E-05 | 0.000107 | 2642.671 | 2512.62  | 2464.281 | 1897.308 | 1835.357 | 1999.909 |
| 6941  | TLCD5     | 1230.984 | -0.40886 | 0.108716 | -3.76079 | 0.000169 | 0.000649 | 1419.182 | 1382.762 | 1416.509 | 1015.618 | 1018.217 | 1133.617 |
| 21221 | LOC103211 | 28.10002 | -0.40894 | 0.482239 | -0.848   | 0.396439 | 0.496677 | 27.10432 | 33.93953 | 35.4823  | 24.5534  | 21.39111 | 26.12947 |
| 18954 | LOC119621 | 86.61146 | -0.40895 | 0.342493 | -1.19403 | 0.232467 | 0.32606  | 129.0166 | 82.11177 | 86.27069 | 46.87467 | 91.98176 | 83.4133  |
| 21919 | LOC119615 | 24.61607 | -0.40898 | 0.551609 | -0.74143 | 0.458432 | 0.556021 | 35.23561 | 23.53871 | 24.3506  | 31.24978 | 19.252   | 14.06971 |
| 9068  | PLCE1     | 1362.87  | -0.4092  | 0.132386 | -3.09097 | 0.001995 | 0.005849 | 1452.249 | 1820.144 | 1392.854 | 1111.599 | 1206.458 | 1193.916 |
| 23009 | LOC103221 | 14.93824 | -0.40924 | 0.729056 | -0.56133 | 0.574573 | 0.663872 | 11.38381 | 20.80165 | 18.78475 | 22.32127 | 4.278221 | 12.05975 |
| 7982  | LOC103231 | 851.2066 | -0.40936 | 0.119794 | -3.4172  | 0.000633 | 0.002107 | 928.594  | 1038.988 | 946.1947 | 747.7625 | 708.0456 | 737.6549 |
| 6520  | TMEM260   | 1792.002 | -0.40938 | 0.104127 | -3.93157 | 8.44E-05 | 0.000344 | 2087.033 | 2144.212 | 1904.912 | 1470.972 | 1552.994 | 1591.887 |
| 7154  | PRKCI     | 5862.711 | -0.40943 | 0.111297 | -3.67874 | 0.000234 | 0.000871 | 6407.461 | 7600.266 | 6062.603 | 4703.092 | 5131.726 | 5271.117 |
| 27709 | LOC119621 | 0.554495 | -0.40958 | 3.460933 | -0.11834 | 0.905796 | NA       | 1.626259 | 0        | 0.695731 | 0        | 0        | 1.004979 |
| 9393  | EIF4G3    | 5057.285 | -0.40963 | 0.136161 | -3.0084  | 0.002626 | 0.007432 | 5201.861 | 7120.733 | 4990.481 | 4270.059 | 4214.048 | 4546.527 |
| 5615  | DENND11   | 2667.889 | -0.40967 | 0.093859 | -4.36471 | 1.27E-05 | 6.03E-05 | 3060.62  | 3150.355 | 2924.855 | 2296.859 | 2196.867 | 2377.781 |
| 14542 | TRAPPC5   | 917.0935 | -0.40967 | 0.213629 | -1.91768 | 0.055151 | 0.100827 | 1201.263 | 659.6312 | 1279.45  | 866.0653 | 678.0981 | 818.0533 |
| 16814 | LOC103231 | 97.86727 | -0.40982 | 0.269099 | -1.52294 | 0.127774 | 0.202027 | 116.0065 | 106.1979 | 111.317  | 93.74933 | 85.56443 | 74.36848 |
| 10057 | PRPF40A   | 9658.905 | -0.41001 | 0.143874 | -2.8498  | 0.004375 | 0.011564 | 9498.437 | 14053.7  | 9514.822 | 8165.12  | 8297.61  | 8423.738 |
| 5292  | ARPP19    | 4038.5   | -0.41002 | 0.090689 | -4.52123 | 6.15E-06 | 3.09E-05 | 4654.896 | 4671.612 | 4506.252 | 3332.566 | 3373.378 | 3692.295 |
| 22700 | LOC103221 | 14.42306 | -0.41013 | 0.674044 | -0.60847 | 0.542877 | 0.635821 | 16.80468 | 12.59047 | 20.17621 | 8.928508 | 14.97377 | 13.06473 |
| 20537 | SERINC4   | 37.81549 | -0.41014 | 0.435518 | -0.94173 | 0.346329 | 0.447515 | 40.11439 | 42.15071 | 45.91827 | 44.64254 | 29.94755 | 24.11951 |
| 10892 | GPATCH4   | 1043.249 | -0.41015 | 0.15466  | -2.65196 | 0.008003 | 0.019532 | 1056.526 | 1475.822 | 1040.118 | 868.2974 | 894.1483 | 924.5811 |
| 7627  | CUNH12orf | 1577.071 | -0.41017 | 0.116613 | -3.51733 | 0.000436 | 0.001519 | 1887.545 | 1643.878 | 1861.777 | 1453.115 | 1384.005 | 1232.105 |
| 12302 | DVD       | 874.4936 | -0.41022 | 0.175032 | -2.34367 | 0.129095 | 0.041261 | 1193.132 | 747.2171 | 1056.816 | 723.2091 | 699.4892 | 827.0981 |
| 6162  | IHP5      | 1388.595 | -0.41024 | 0.100238 | -4.09264 | 0.42606  | 0.000184 | 1581.266 | 1590.231 | 1582.789 | 1162.938 | 1221.432 | 1192.911 |
| 12545 | RND2      | 305.7429 | -0.41035 | 0.17888  | -2.29397 | 0.021792 | 0.046182 | 324.7097 | 403.4425 | 319.3407 | 258.9267 | 256.6933 | 271.3445 |
| 6350  | CHMP5     | 3165.424 | -0.4105  | 0.102463 | -4.00631 | 6.17E-05 | 0.000258 | 3815.204 | 3239.036 | 3784.083 | 2738.82  | 2705.975 | 2709.425 |
| 6797  | RRP1      | 1644.992 | -0.4105  | 0.107518 | -3.81798 | 0.000135 | 0.000526 | 1913.565 | 1851.347 | 1874.996 | 1357.133 | 1326.249 | 1546.663 |
| 9648  | CUNH9orf1 | 565.7365 | -0.41053 | 0.139286 | -2.94741 | 0.003204 | 0.00883  | 643.4565 | 689.1915 | 608.0692 | 455.3539 | 472.7435 | 525.6043 |
| 21684 | GDA       | 40.04939 | -0.41065 | 0.526745 | -0.7796  | 0.435624 | 0.534084 | 43.36691 | 45.98259 | 45.91827 | 26.78552 | 64.17332 | 14.06971 |
| 6364  | FBXO8     | 1429.811 | -0.41067 | 0.102739 | -3.99719 | 6.41E-05 | 0.000268 | 1705.946 | 1618.697 | 1569.57  | 1252.223 | 1221.432 | 1211     |
| 9743  | WNK1      | 12446.56 | -0.41077 | 0.140753 | -2.91839 | 0.003518 | 0.009601 | 12265.79 | 17957.84 | 12397.24 | 10620.46 | 10383.24 | 11054.77 |
| 29533 | LOC119621 | 0.555383 | -0.41079 | 3.082445 | -0.13327 | 0.89398  | NA       | 1.084173 | 0.547412 | 0.695731 | 0        | 0        | 1.004979 |
| 12485 | ANKRD16   | 372.59   | -0.41085 | 0.178371 | -2.30334 | 0.02126  | 0.045253 | 489.504  | 379.9038 | 410.4815 | 294.6408 | 295.1973 | 365.8125 |
| 7092  | NR2C2     | 3008.156 | -0.41091 | 0.111104 | -3.70054 | 0.000215 | 0.000806 | 3379.366 | 3724.043 | 3205.234 | 2401.769 | 2481.368 | 2857.157 |
| 7114  | ZNF496    | 1837.478 | -0.41094 | 0.111307 | -3.69192 | 0.000223 | 0.000832 | 2193.824 | 2000.243 | 2105.979 | 1522.311 | 1458.873 | 1743.639 |
| 8492  | UPP1      | 2005.202 | -0.41102 | 0.126161 | -3.25794 | 0.001122 | 0.003513 | 2444.267 | 1918.131 | 2507.416 | 1683.024 | 1683.48  | 1794.893 |
| 20823 | LOC119621 | 39.02865 | -0.41125 | 0.456388 | -0.9011  | 0.367537 | 0.469239 | 52.58238 | 28.46541 | 52.17985 | 29.01765 | 42.78221 | 29.1444  |
| 16829 | LOC119621 | 96.40823 | -0.41126 | 0.270633 | -1.51962 | 0.128606 | 0.20316  | 116.5486 | 101.2712 | 112.7085 | 73.66019 | 89.84265 | 84.41828 |
| 7996  | STK38L    | 1555.514 | -0.4113  | 0.120486 | -3.41372 | 0.000641 | 0.002131 | 1670.71  | 2021.044 | 1636.36  | 1290.169 | 1354.057 | 1360.742 |
| 13854 | LOC103241 | 914.1217 | -0.41132 | 0.201757 | -2.03871 | 0.004179 | 0.079596 | 762.1734 | 1436.409 | 930.1928 |          |          |          |



|       |          |          |          |          |          |          |          |          |          |          |          |          |          |
|-------|----------|----------|----------|----------|----------|----------|----------|----------|----------|----------|----------|----------|----------|
| 6297  | IFRD1    | 3187.546 | -0.41156 | 0.102185 | -4.0276  | 5.64E-05 | 0.000238 | 3812.493 | 3302.535 | 3807.042 | 2667.392 | 2669.61  | 2866.201 |
| 5283  | UCK2     | 7854.596 | -0.41178 | 0.090947 | -4.52764 | 5.96E-06 | 3.00E-05 | 9120.603 | 9193.234 | 8597.153 | 6689.685 | 6323.211 | 7203.693 |
| 16980 | LOC10324 | 92.00566 | -0.41193 | 0.275357 | -1.49599 | 0.134657 | 0.210828 | 104.0806 | 95.79707 | 115.4914 | 78.12444 | 79.14709 | 79.39338 |
| 20650 | LOC11962 | 33.66181 | -0.41208 | 0.443862 | -0.92841 | 0.353196 | 0.454708 | 34.69353 | 38.86624 | 41.04815 | 29.01765 | 34.22577 | 24.11951 |
| 19073 | CCER2    | 53.89021 | -0.41209 | 0.350988 | -1.17408 | 0.240365 | 0.335024 | 61.79785 | 58.02565 | 64.00729 | 49.10679 | 49.19955 | 41.20416 |
| 5792  | PCBD1    | 5533.938 | -0.41223 | 0.096336 | -4.27906 | 1.88E-05 | 8.61E-05 | 5987.344 | 6924.212 | 6043.123 | 4866.037 | 4750.965 | 4631.95  |
| 7168  | LOC10322 | 2404.482 | -0.41226 | 0.11219  | -3.67464 | 0.000238 | 0.000883 | 2987.98  | 2419.013 | 2833.018 | 1997.754 | 2053.546 | 2135.581 |
| 17135 | PRRT2    | 100.0086 | -0.4125  | 0.279591 | -1.47538 | 0.140111 | 0.217383 | 99.74389 | 135.2107 | 106.4469 | 89.28508 | 91.98176 | 77.38342 |
| 8334  | RHOF     | 1080.405 | -0.4126  | 0.124938 | -3.30241 | 0.000959 | 0.003058 | 1308.054 | 1127.668 | 1271.797 | 888.3865 | 868.4789 | 1018.044 |
| 5305  | OTULIN   | 5491.292 | -0.41276 | 0.091424 | -4.51483 | 6.34E-06 | 3.18E-05 | 6508.831 | 6270.602 | 6042.427 | 4537.914 | 4552.027 | 5035.952 |
| 17913 | LOC10323 | 77.50859 | -0.41288 | 0.303879 | -1.35869 | 0.174244 | 0.258599 | 93.23886 | 97.98671 | 74.44326 | 64.73168 | 66.31243 | 68.3386  |
| 6791  | MRPL1    | 1714.031 | -0.41308 | 0.108103 | -3.82116 | 0.000133 | 0.00052  | 1956.932 | 1957.545 | 1952.918 | 1437.49  | 1623.585 | 1355.717 |
| 9828  | TRIM28   | 10826.22 | -0.4132  | 0.142512 | -2.89938 | 0.003739 | 0.010114 | 13834.04 | 9936.072 | 13335.78 | 8828.062 | 8224.881 | 10798.5  |
| 23397 | LOC11962 | 10.63125 | -0.41322 | 0.827619 | -0.49929 | 0.617578 | 0.701727 | 13.55216 | 13.6853  | 8.348776 | 15.62489 | 8.556443 | 4.019918 |
| 15969 | RHEBL1   | 137.8907 | -0.41323 | 0.247287 | -1.67104 | 0.094713 | 0.157677 | 165.8784 | 129.7366 | 176.02   | 133.9276 | 111.2338 | 110.5477 |
| 18880 | LOC11962 | 59.87845 | -0.41336 | 0.342538 | -1.20675 | 0.227529 | 0.320384 | 73.72375 | 56.38342 | 75.13899 | 53.57105 | 49.19955 | 51.25395 |
| 6666  | TUBG2    | 1772.769 | -0.41338 | 0.106776 | -3.87146 | 0.000108 | 0.000431 | 2127.689 | 2073.049 | 1878.475 | 1482.132 | 1465.291 | 1609.977 |
| 3926  | NDFIP2   | 15760.07 | -0.41365 | 0.076254 | -5.42457 | 5.81E-08 | 3.93E-07 | 17888.31 | 18351.98 | 17772.46 | 13609.28 | 13348.05 | 13590.34 |
| 7505  | ING5     | 1004.972 | -0.41373 | 0.116263 | -3.5586  | 0.000373 | 0.001321 | 1222.947 | 1101.94  | 1122.91  | 839.2797 | 834.2532 | 908.5014 |
| 9037  | HNRNPU   | 29661.6  | -0.41374 | 0.133339 | -3.10288 | 0.001916 | 0.005638 | 29722.05 | 42020.43 | 29917.14 | 24758.75 | 24865.02 | 26686.22 |
| 27877 | LOC11962 | 0.55627  | -0.41374 | 3.081052 | -0.13428 | 0.893178 | NA       | 0.542086 | 1.094824 | 0.695731 | 0        | 0        | 1.004979 |
| 11870 | ISL2     | 300.4818 | -0.41405 | 0.170192 | -2.43283 | 0.014981 | 0.033553 | 339.8882 | 358.5547 | 333.2553 | 270.0874 | 226.7457 | 274.3594 |
| 5652  | MAST2    | 3627.292 | -0.41411 | 0.095295 | -4.34561 | 1.39E-05 | 6.53E-05 | 4111.725 | 4293.898 | 4034.546 | 3051.318 | 2932.721 | 3339.547 |
| 14819 | CUNH15or | 207.8291 | -0.41418 | 0.221669 | -1.86846 | 0.061698 | 0.110685 | 262.3698 | 186.12   | 262.9865 | 171.8738 | 196.7982 | 166.8266 |
| 5352  | MAPK9    | 3137.815 | -0.41423 | 0.092293 | -4.48818 | 7.18E-06 | 3.57E-05 | 3740.938 | 3402.164 | 3615.716 | 2660.695 | 2639.663 | 2767.713 |
| 6835  | SRXN1    | 33616.35 | -0.41441 | 0.108954 | -3.80349 | 0.000143 | 0.000555 | 42471.38 | 33919.83 | 38850.34 | 27848.02 | 27183.82 | 31424.7  |
| 10867 | RNF180   | 830.4235 | -0.41459 | 0.156096 | -2.656   | 0.007907 | 0.019345 | 841.318  | 1154.492 | 849.488  | 683.0309 | 765.8016 | 688.4109 |
| 9591  | FNDC4    | 771.3536 | -0.4146  | 0.139912 | -2.96331 | 0.003044 | 0.008436 | 819.6346 | 961.2551 | 869.6642 | 616.067  | 611.7857 | 749.7147 |
| 5731  | TXNDC5   | 11760.05 | -0.41463 | 0.096244 | -4.30805 | 1.65E-05 | 7.64E-05 | 13791.22 | 13613.04 | 12919.73 | 9993.232 | 9217.428 | 11025.63 |
| 7502  | HSBP1    | 8287.463 | -0.41463 | 0.116481 | -3.55963 | 0.000371 | 0.001316 | 10183.09 | 7915.027 | 10310.74 | 7372.715 | 7076.178 | 6867.025 |
| 8435  | LSM14B   | 2044.303 | -0.41463 | 0.126692 | -3.27275 | 0.001065 | 0.003357 | 2250.743 | 2655.495 | 2107.37  | 1720.97  | 1593.637 | 1937.6   |
| 13186 | EPB41L4A | 258.2556 | -0.41475 | 0.190944 | -2.17209 | 0.029849 | 0.06018  | 273.7536 | 337.2057 | 272.031  | 241.0697 | 222.4675 | 203.0059 |
| 8388  | WDR74    | 1679.538 | -0.41485 | 0.12625  | -3.28597 | 0.001016 | 0.003221 | 2103.837 | 1723.252 | 1938.308 | 1323.651 | 1371.17  | 1617.012 |
| 11547 | LOC10324 | 632.9634 | -0.41486 | 0.165637 | -2.50465 | 0.012257 | 0.082221 | 790.904  | 597.2263 | 786.8722 | 524.5498 | 479.1608 | 619.0674 |
| 5334  | GRB2     | 5477.797 | -0.41494 | 0.09219  | -4.50088 | 6.77E-06 | 3.37E-05 | 6336.99  | 6451.248 | 5999.292 | 4604.878 | 4451.489 | 5022.887 |
| 21326 | LOC10324 | 26.49916 | -0.41524 | 0.501325 | -0.82829 | 0.407509 | 0.508001 | 30.89892 | 24.08612 | 36.17803 | 22.32127 | 21.39111 | 24.11951 |
| 11154 | DALRD3   | 1255.867 | -0.41532 | 0.160262 | -2.59151 | 0.009556 | 0.022776 | 1609.997 | 1164.892 | 1537.566 | 1049.1   | 913.4003 | 1260.244 |
| 7360  | UBE2F    | 1498.502 | -0.41535 | 0.11496  | -3.61299 | 0.000303 | 0.001093 | 1830.084 | 1592.421 | 1720.544 | 1294.634 | 1176.511 | 1376.822 |
| 14928 | LOC10322 | 166.005  | -0.41537 | 0.224636 | -1.8491  | 0.064443 | 0.114773 | 181.0568 | 179.5511 | 205.9365 | 147.3204 | 162.5724 | 119.5926 |
| 7895  | ZMYND19  | 922.7394 | -0.41564 | 0.120759 | -3.44188 | 0.000578 | 0.001945 | 1012.075 | 1104.13  | 1052.642 | 787.9408 | 729.4367 | 850.2126 |
| 21027 | LOC10322 | 31.77873 | -0.41565 | 0.474237 | -0.87645 | 0.380785 | 0.481437 | 42.82482 | 33.39212 | 32.00364 | 37.94616 | 21.39111 | 23.11453 |
| 6275  | MEX3C    | 3168.18  | -0.41565 | 0.102874 | -4.04039 | 5.34E-05 | 0.000226 | 3594.033 | 3895.93  | 3379.863 | 2656.231 | 2577.628 | 2905.396 |
| 14227 | FHIT     | 216.4887 | -0.41566 | 0.210865 | -1.97123 | 0.048698 | 0.090998 | 260.7435 | 246.3353 | 235.1572 | 225.4448 | 143.3204 | 187.9312 |
| 11525 | NDUFAF2  | 702.0478 | -0.41567 | 0.165676 | -2.50892 | 0.01211  | 0.027935 | 713.3857 | 995.7421 | 697.1228 | 584.8173 | 635.3159 | 585.903  |
| 21203 | SH3TC2   | 30.98623 | -0.41585 | 0.489596 | -0.84938 | 0.395669 | 0.496079 | 40.65648 | 24.08612 | 41.04815 | 33.4819  | 23.53022 | 23.11453 |
| 18400 | SFTA2    | 65.89321 | -0.41608 | 0.329034 | -1.26455 | 0.206033 | 0.297684 | 66.67662 | 84.30142 | 73.74753 | 62.49956 | 59.8951  | 48.23901 |
| 5330  | CBX3     | 5247.041 | -0.41611 | 0.092415 | -4.50261 | 6.71E-06 | 3.35E-05 | 5725.516 | 6453.985 | 5812.836 | 4495.504 | 4624.757 | 4369.651 |
| 23703 | LOC10321 | 8.603072 | -0.41629 | 0.918774 | -0.45309 | 0.650481 | 0.729572 | 8.131296 | 16.42235 | 4.87012  | 4.464254 | 10.69555 | 7.034856 |
| 21620 | LOC11962 | 2226.769 | -0.41631 | 0.528692 | -0.78743 | 0.431033 | 0.530019 | 3402.676 | 1017.091 | 3218.453 | 1814.719 | 1636.42  | 2271.254 |
| 6168  | EEF1E1   | 2404.057 | -0.41632 | 0.101803 | -4.08947 | 4.32E-05 | 0.000186 | 2821.56  | 2583.236 | 2835.105 | 2093.735 | 2171.197 | 1919.511 |
| 17410 | TRNAE-CU | 205.714  | -0.41632 | 0.291475 | -1.42833 | 0.153196 | 0.23393  | 267.7907 | 143.9693 | 297.0773 | 147.3204 | 154.016  | 224.1104 |
| 7967  | POU2F1   | 2853.206 | -0.41642 | 0.121759 | -3.42007 | 0.000626 | 0.002089 | 3204.815 | 3748.676 | 2835.801 | 2348.198 | 2397.943 | 2583.802 |
| 8129  | SELENOF  | 7703.215 | -0.41643 | 0.123544 | -3.37071 | 0.00075  | 0.002452 | 9057.179 | 7403.197 | 9957.307 | 6640.578 | 7121.099 | 6039.927 |
| 11018 | CWF19L2  | 1525.285 | -0.41658 | 0.158681 | -2.62527 | 0.008658 | 0.020891 | 1532.478 | 2229.061 | 1470.776 | 1310.259 | 1268.493 | 1340.643 |
| 7118  | GTF2H5   | 2345.57  | -0.4166  | 0.112903 | -3.6899  | 0.000224 | 0.000838 | 2865.493 | 2902.925 | 2670.913 | 1979.897 | 2199.006 | 1854.187 |
| 6788  | GABPB1   | 1682.008 | -0.41662 | 0.109011 | -3.8218  | 0.000132 | 0.000519 | 1467.188 | 2094.945 | 1813.772 | 1455.347 | 1490.96  | 1379.837 |
| 11116 | ZNF77    | 401.7146 | -0.41678 | 0.160326 | -2.59958 | 0.009334 | 0.022323 | 450.4738 | 492.6706 | 438.3108 | 296.8729 | 355.0924 | 376.8673 |
| 6740  | OARD1    | 2005.873 | -0.41693 | 0.108543 | -3.8412  | 0.000122 | 0.000483 | 2188.403 | 2487.439 | 2208.947 | 1749.988 | 1591.498 | 1808.963 |
| 20101 | LOC10322 | 41.16162 | -0.417   | 0.411959 | -1.01224 | 0.311425 | 0.411882 | 54.75072 | 39.41365 | 46.614   | 31.24978 | 42.78221 | 32.15934 |
| 12519 | LOC11962 | 476.0812 | -0.41707 | 0.181514 | -2.29775 | 0.021576 | 0.045818 | 614.1839 | 419.3174 | 599.7204 | 437.4969 | 380.7617 | 405.0067 |
| 7252  | RNF181   | 2210.38  | -0.41714 | 0.114246 | -3.65128 | 0.000261 | 0.000957 | 2673.57  | 2246.578 | 2666.043 | 1959.807 | 1745.514 | 1970.765 |
| 7153  | FAM135A  | 1774.031 | -0.4172  | 0.113373 | -3.67987 | 0.000233 | 0.000867 | 1937.417 | 2262.453 | 1886.128 | 1464.275 | 1574.385 | 1519.529 |
| 6136  | TRAF7    | 2666.732 | -0.41729 | 0.101733 | -4.10187 | 4.10E-05 | 0.000178 | 3111.034 | 2898.546 | 3146.793 | 2256.68  | 2124.137 | 2463.205 |
| 6518  | ADAMTS9  | 7194.992 | -0.41744 | 0.106163 | -3.93203 | 8.42E-05 | 0.000344 | 7936.144 | 9117.144 | 7638.435 | 5671.835 | 6207.699 | 6598.695 |
| 7101  | NDUFAF7  | 1408.973 | -0.41773 | 0.113033 | -3.69562 | 0.000219 | 0.000821 | 1700.525 | 1516.878 | 1623.141 | 1174.099 | 1133.729 | 1305.468 |
| 6272  | YY1      | 5479.295 | -0.41784 | 0.103379 | -4.04181 | 5.30E-05 | 0.000225 | 6006.317 | 6904.505 | 5895.628 | 4712.02  | 4376.62  | 4980.678 |
| 13857 | LOC10324 | 243.9909 | -0.41802 | 0.205123 | -2.0379  | 0.04156  | 0.079733 | 319.831  | 241.4086 | 272.7267 | 223.2127 | 228.8848 | 177.8814 |
| 7124  | OSBPL11  | 2348.236 | -0.41815 | 0.113368 | -3.68841 | 0.000226 | 0.000842 | 2496.85  | 3039.778 | 2522.026 | 2066.95  | 1933.756 | 2030.059 |
| 6235  | PMPCA    | 3458.81  | -0.41824 | 0.103032 | -4.05934 | 4.92E-05 | 0.00021  | 4019.57  | 3918.374 | 3939.927 | 2986.586 | 2650.358 | 3238.044 |
| 20057 | LOC10322 | 59.94148 | -0.41833 | 0.410389 | -1.01935 | 0.308036 | 0.408293 | 54.20864 | 96.89189 | 52.87558 | 71.42806 | 47.06043 | 37.18424 |
| 4269  | TPT1     | 37970.35 |          |          |          |          |          |          |          |          |          |          |          |



|       |           |          |          |          |          |          |          |          |          |          |          |          |          |
|-------|-----------|----------|----------|----------|----------|----------|----------|----------|----------|----------|----------|----------|----------|
| 19372 | LOC103225 | 68.24296 | -0.41871 | 0.372544 | -1.12393 | 0.261041 | 0.358244 | 60.17159 | 105.1031 | 67.48594 | 78.12444 | 51.33866 | 47.23404 |
| 5879  | TLF1      | 4246.15  | -0.41878 | 0.099113 | -4.22527 | 2.39E-05 | 0.000108 | 4892.872 | 4946.961 | 4744.192 | 3450.868 | 3431.134 | 4010.873 |
| 6547  | PTPN14    | 14801.24 | -0.41888 | 0.106823 | -3.92126 | 8.81E-05 | 0.000358 | 15995.34 | 19025.85 | 15790.32 | 12138.31 | 12109.51 | 13748.12 |
| 4579  | BUD23     | 3738.738 | -0.41904 | 0.084597 | -4.95337 | 7.29E-07 | 4.23E-06 | 4351.327 | 4249.011 | 4233.525 | 3149.531 | 3247.17  | 3201.865 |
| 12439 | IBA57     | 417.8082 | -0.41913 | 0.181204 | -2.313   | 0.020723 | 0.044289 | 541.0022 | 437.382  | 461.2699 | 292.4086 | 348.675  | 426.1113 |
| 10477 | TRIM47    | 1106.856 | -0.41923 | 0.152451 | -2.74996 | 0.00596  | 0.015124 | 1433.276 | 1025.85  | 1345.544 | 890.6187 | 885.5918 | 1060.253 |
| 21274 | LOC103235 | 28.3818  | -0.41925 | 0.499478 | -0.83938 | 0.401255 | 0.501427 | 28.73058 | 30.10765 | 38.26523 | 31.85702 | 34.22577 | 21.10457 |
| 11939 | LOC103225 | 607.8055 | -0.41942 | 0.173551 | -2.41672 | 0.015661 | 0.034873 | 772.4731 | 573.1402 | 745.824  | 522.3177 | 432.1004 | 600.9777 |
| 24356 | LOC119625 | 5.043435 | -0.41942 | 1.187736 | -0.35313 | 0.723991 | 0.790244 | 7.589209 | 4.379295 | 5.565851 | 6.696381 | 0        | 6.029877 |
| 5604  | VPS35L    | 8565.98  | -0.41943 | 0.095925 | -4.37251 | 1.23E-05 | 5.83E-05 | 10102.32 | 9709.443 | 9605.963 | 6919.594 | 6973.501 | 8085.06  |
| 22773 | LOC119625 | 12.8151  | -0.41956 | 0.702928 | -0.59688 | 0.550587 | 0.642751 | 14.63633 | 12.04306 | 17.39328 | 8.928508 | 12.83466 | 11.05477 |
| 8688  | PGS       | 1527.089 | -0.41964 | 0.130846 | -3.20716 | 0.001341 | 0.004102 | 1967.774 | 1476.917 | 1799.857 | 1337.044 | 1234.267 | 1346.672 |
| 10081 | RTLL1     | 2394.839 | -0.41972 | 0.1477   | -2.84167 | 0.004488 | 0.011835 | 3102.36  | 2199.501 | 2926.942 | 1928.558 | 1861.026 | 2350.647 |
| 6618  | ADO       | 2193.774 | -0.41974 | 0.107771 | -3.89473 | 9.83E-05 | 0.000395 | 2461.614 | 2693.814 | 2382.184 | 1866.058 | 1736.958 | 2022.019 |
| 7991  | ELL2      | 9177.923 | -0.41981 | 0.122929 | -3.41507 | 0.000638 | 0.002121 | 9431.761 | 12614.01 | 9466.817 | 7729.856 | 7801.337 | 8023.756 |
| 19929 | LOC103225 | 47.75415 | -0.41986 | 0.402885 | -1.04214 | 0.297348 | 0.396657 | 45.53526 | 64.59459 | 53.57132 | 29.01765 | 55.61688 | 38.18922 |
| 5193  | COPS7A    | 3500.225 | -0.41997 | 0.091654 | -4.58214 | 4.60E-06 | 2.36E-05 | 3991.924 | 3981.874 | 4051.94  | 2917.39  | 2866.408 | 3191.815 |
| 9052  | PRKAR2A   | 1558.148 | -0.42    | 0.13567  | -3.09571 | 0.001963 | 0.005766 | 1691.852 | 2042.393 | 1622.446 | 1225.438 | 1249.241 | 1517.519 |
| 10659 | PDSS1     | 383.413  | -0.42001 | 0.155488 | -2.70124 | 0.006908 | 0.017229 | 422.2853 | 425.339  | 468.2272 | 357.1403 | 305.8928 | 321.5934 |
| 7199  | PBX2      | 4564.384 | -0.42017 | 0.114543 | -3.66825 | 0.000244 | 0.000902 | 4870.104 | 6004.56  | 4801.242 | 3946.401 | 3670.714 | 4093.281 |
| 21493 | LOC119625 | 29.6935  | -0.4202  | 0.522302 | -0.80452 | 0.4211   | 0.520864 | 35.7777  | 20.80165 | 44.52681 | 29.01765 | 29.94755 | 18.08963 |
| 21825 | LOC119625 | 22.2506  | -0.42021 | 0.555903 | -0.75591 | 0.449703 | 0.547742 | 20.0572  | 28.46541 | 27.82925 | 13.39276 | 25.66933 | 18.08963 |
| 13205 | NSRP1     | 2069.049 | -0.42027 | 0.193876 | -2.16773 | 0.030179 | 0.060758 | 1849.057 | 3352.35  | 1901.434 | 1805.791 | 1852.47  | 1653.191 |
| 22719 | LOC119625 | 13.19787 | -0.42038 | 0.69417  | -0.60559 | 0.544789 | 0.637493 | 17.34676 | 15.87494 | 11.82743 | 13.39276 | 10.69555 | 10.04979 |
| 23007 | LOC103225 | 13.12643 | -0.42045 | 0.748463 | -0.56175 | 0.574289 | 0.663577 | 17.34676 | 10.94824 | 16.69755 | 4.464254 | 19.252   | 10.04979 |
| 7279  | ELOVL2    | 1810.84  | -0.4207  | 0.115566 | -3.64031 | 0.000272 | 0.000995 | 1988.915 | 2308.436 | 1925.784 | 1464.275 | 1529.464 | 1648.166 |
| 8695  | THOC2     | 6290.058 | -0.42089 | 0.131325 | -3.20493 | 0.001351 | 0.004131 | 6476.848 | 8799.098 | 6329.068 | 5189.695 | 5349.916 | 5595.726 |
| 7425  | UCKL1     | 1287.979 | -0.42111 | 0.117289 | -3.59036 | 0.00033  | 0.001182 | 1478.27  | 1498.266 | 1448.513 | 1205.349 | 966.878  | 1130.602 |
| 18610 | LOC119625 | 64.75862 | -0.42115 | 0.341138 | -1.23455 | 0.216999 | 0.309867 | 66.67662 | 89.77554 | 64.70302 | 60.26743 | 59.8951  | 47.23404 |
| 6763  | KITLG     | 1339.684 | -0.42137 | 0.109978 | -3.83135 | 0.000127 | 0.000501 | 1466.886 | 1655.373 | 1481.908 | 1122.76  | 1127.311 | 1183.866 |
| 7594  | LOC119625 | 4062.941 | -0.4215  | 0.119479 | -3.52783 | 0.000419 | 0.001467 | 4254.294 | 5352.045 | 4354.583 | 3517.832 | 3174.44  | 3724.454 |
| 7944  | RB1       | 6381.463 | -0.42152 | 0.123062 | -3.4253  | 0.000614 | 0.002055 | 6708.319 | 8705.49  | 6509.958 | 5285.677 | 5367.029 | 5712.303 |
| 5986  | HPSS      | 2263.482 | -0.42154 | 0.101094 | -4.16979 | 3.05E-05 | 0.000135 | 2759.22  | 2497.84  | 2523.418 | 1848.201 | 1908.087 | 2044.128 |
| 5432  | PRPF31    | 2922.751 | -0.42167 | 0.094847 | -4.44575 | 8.76E-06 | 4.29E-05 | 3414.06  | 3330.453 | 3299.158 | 2591.499 | 2314.58  | 2586.817 |
| 23570 | LOC119625 | 8.161196 | -0.42169 | 0.889841 | -0.47389 | 0.635576 | 0.716877 | 10.29964 | 8.211177 | 9.044508 | 6.696381 | 10.69555 | 4.019918 |
| 6737  | NAV3      | 11959.21 | -0.42178 | 0.109781 | -3.842   | 0.000122 | 0.000482 | 12921.71 | 15657.07 | 12510.64 | 10020.02 | 9762.901 | 10882.92 |
| 18445 | LOC119625 | 90.33382 | -0.42182 | 0.335384 | -1.25773 | 0.20849  | 0.300505 | 88.90216 | 143.9693 | 78.61764 | 75.89232 | 64.17332 | 90.44815 |
| 6148  | ZMYM2     | 5051.096 | -0.42182 | 0.102932 | -4.09807 | 4.17E-05 | 0.00018  | 5616.557 | 6442.49  | 5295.907 | 4254.434 | 4246.135 | 4451.054 |
| 6597  | MBTPS1    | 2669.916 | -0.42184 | 0.108065 | -3.90356 | 9.48E-05 | 0.000382 | 2905.041 | 3339.759 | 2932.508 | 2299.091 | 2107.024 | 2436.07  |
| 7445  | POL1      | 1118.402 | -0.42205 | 0.117768 | -3.58373 | 0.000339 | 0.00121  | 1319.98  | 1315.978 | 1207.79  | 866.0653 | 1026.773 | 973.8251 |
| 10139 | TPR       | 20589.56 | -0.42206 | 0.149156 | -2.82968 | 0.004659 | 0.012217 | 20275.66 | 30537.92 | 19927.83 | 17236.48 | 17132.14 | 18427.3  |
| 8338  | SLOC4A1   | 5939.167 | -0.42216 | 0.127907 | -3.30056 | 0.000965 | 0.003077 | 7319.25  | 5771.91  | 7322.573 | 4944.161 | 4530.636 | 5746.473 |
| 7054  | AGBL5     | 1515.117 | -0.42221 | 0.1138   | -3.71013 | 0.000207 | 0.000781 | 1662.037 | 1906.088 | 1639.143 | 1334.812 | 1215.015 | 1333.608 |
| 7319  | PHOSPHO2  | 797.4769 | -0.42225 | 0.116393 | -3.62783 | 0.000286 | 0.001038 | 919.3785 | 898.8502 | 923.9313 | 667.406  | 673.8199 | 701.4757 |
| 4742  | RACGAP1   | 2917.628 | -0.42228 | 0.08697  | -4.85548 | 1.20E-06 | 6.73E-06 | 3308.895 | 3333.738 | 3383.342 | 2502.214 | 2462.116 | 2515.464 |
| 11489 | RPS26     | 9180.261 | -0.42242 | 0.167696 | -2.51894 | 0.011771 | 0.027237 | 8025.589 | 14008.27 | 9507.169 | 8299.048 | 8055.891 | 7185.603 |
| 23757 | LOC103235 | 8.162639 | -0.42246 | 0.951748 | -0.44387 | 0.657133 | 0.735327 | 15.17842 | 8.211177 | 4.174388 | 6.696381 | 10.69555 | 4.019918 |
| 6680  | GANC      | 1128.137 | -0.42252 | 0.109306 | -3.86553 | 0.000111 | 0.000441 | 1280.95  | 1348.275 | 1248.838 | 979.9037 | 921.9567 | 988.8998 |
| 13750 | DPH2      | 231.1937 | -0.42267 | 0.205353 | -2.05825 | 0.039566 | 0.076499 | 224.4238 | 272.0637 | 300.556  | 174.1059 | 198.9373 | 217.0756 |
| 19215 | LOC103235 | 56.99612 | -0.42272 | 0.367208 | -1.15117 | 0.249664 | 0.34538  | 50.95612 | 79.92212 | 64.70302 | 42.41041 | 57.75599 | 46.22906 |
| 5301  | TYMS      | 2818.86  | -0.42281 | 0.093607 | -4.51687 | 6.28E-06 | 3.15E-05 | 3096.939 | 3340.307 | 3253.936 | 2408.465 | 2308.1   | 2505.414 |
| 8742  | UXT       | 2272.003 | -0.42283 | 0.132536 | -3.19031 | 0.001421 | 0.004322 | 2830.775 | 2117.389 | 2858.76  | 1890.612 | 2047.129 | 1887.351 |
| 12259 | BTG4      | 243.7489 | -0.42307 | 0.17973  | -2.35393 | 0.018576 | 0.040285 | 275.3799 | 296.1498 | 265.7694 | 203.1236 | 216.0502 | 206.0208 |
| 4764  | PPA1      | 6023.504 | -0.42319 | 0.087509 | -4.83591 | 1.33E-06 | 7.40E-06 | 7010.261 | 6486.83  | 7203.603 | 5149.517 | 5223.708 | 5067.106 |
| 24998 | LOC119625 | 2.089182 | -0.42341 | 1.72382  | -0.24563 | 0.085972 | 0.85714  | 3.252518 | 2.737059 | 1.391463 | 0        | 2.139111 | 3.014938 |
| 8091  | TMEM268   | 846.0507 | -0.42352 | 0.125191 | -3.38295 | 0.000717 | 0.002356 | 998.5231 | 897.208  | 1012.289 | 674.1023 | 778.6363 | 715.5454 |
| 5970  | RRP36     | 2209.523 | -0.4236  | 0.101403 | -4.17736 | 2.95E-05 | 0.000131 | 2574.368 | 2442.552 | 2585.338 | 1785.702 | 1831.079 | 2038.098 |
| 6789  | BZW2      | 6543.511 | -0.42364 | 0.11085  | -3.82175 | 0.000133 | 0.000519 | 7839.111 | 6408.003 | 8245.112 | 5593.71  | 5638.696 | 5536.432 |
| 11115 | SAFB      | 4559.19  | -0.42368 | 0.162944 | -2.60018 | 0.009317 | 0.022286 | 4241.284 | 6916.001 | 4515.992 | 3854.883 | 3698.522 | 4128.456 |
| 7086  | ZWINT     | 3595.027 | -0.42375 | 0.114479 | -3.7015  | 0.000214 | 0.000804 | 3815.204 | 4743.871 | 3798.693 | 3151.763 | 2956.251 | 3104.382 |
| 18291 | LOC103235 | 68.24589 | -0.42378 | 0.329848 | -1.28476 | 0.198875 | 0.289055 | 62.88202 | 90.32295 | 80.70484 | 60.26743 | 62.03421 | 53.26391 |
| 7163  | CUNH9orf5 | 1857.275 | -0.42387 | 0.115308 | -3.67599 | 0.000237 | 0.000879 | 2218.217 | 1868.864 | 2300.088 | 1546.864 | 1576.525 | 1633.092 |
| 6562  | APPL1     | 6985.758 | -0.42402 | 0.108303 | -3.91515 | 9.03E-05 | 0.000366 | 7490.007 | 9165.863 | 7360.838 | 5857.101 | 5910.363 | 6130.375 |
| 16620 | LOC119625 | 118.1941 | -0.42408 | 0.272764 | -1.55474 | 0.120009 | 0.191964 | 154.4946 | 105.1031 | 148.1908 | 89.28508 | 100.5382 | 111.5527 |
| 7327  | TPP2      | 4835.7   | -0.42409 | 0.117019 | -3.62414 | 0.00029  | 0.001052 | 5173.13  | 6360.925 | 5094.841 | 3808.009 | 4141.318 | 4435.979 |
| 11610 | ASPRV1    | 326.0285 | -0.42413 | 0.170204 | -2.49191 | 0.012706 | 0.029094 | 417.9486 | 335.016  | 368.0419 | 274.5516 | 280.2235 | 280.3893 |
| 19086 | LOC103215 | 59.76959 | -0.42416 | 0.361199 | -1.17174 | 0.241302 | 0.33611  | 67.21871 | 73.35318 | 62.61582 | 62.49956 | 57.75599 | 35.17428 |
| 5050  | MRPL20    | 2512.269 | -0.42426 | 0.091014 | -4.66146 | 3.14E-06 | 1.65E-05 | 2850.832 | 2860.774 | 2928.333 | 2167.395 | 2066.381 | 2199.9   |
| 21632 | LOC119625 | 21.88596 | -0.42441 | 0.540979 | -0.78452 | 0.432736 | 0.531818 | 28.18849 | 22.44388 | 24.3506  | 17.85702 | 21.39111 | 17.08465 |
| 8043  | DMTF1     | 3096.719 | -0.42462 | 0.124839 | -3.40132 | 0.000671 | 0.002217 | 3077.424 | 4147.739 | 3424.39  | 2495.518 | 2701.697 | 2733.544 |
| 10355 | LOC103225 | 1073.656 | -0.42469 | 0.153038 | -2.77509 | 0.005519 | 0.014169 |          |          |          |          |          |          |



|       |           |          |          |          |          |          |          |          |          |          |          |          |          |
|-------|-----------|----------|----------|----------|----------|----------|----------|----------|----------|----------|----------|----------|----------|
| 8736  | SETD1A    | 1569.116 | -0.42514 | 0.133167 | -3.19249 | 0.001411 | 0.004292 | 1646.316 | 2139.833 | 1609.227 | 1343.74  | 1336.944 | 1338.633 |
| 16987 | LOC103245 | 130.0544 | -0.42517 | 0.284523 | -1.49434 | 0.135087 | 0.211392 | 186.4777 | 112.7668 | 149.5822 | 118.3027 | 85.56443 | 127.6324 |
| 23331 | LOC103215 | 10.76328 | -0.42528 | 0.835801 | -0.50883 | 0.610873 | 0.695992 | 12.46799 | 19.70683 | 4.87012  | 8.928508 | 8.556443 | 10.04979 |
| 21858 | LOC103244 | 20.70934 | -0.42528 | 0.566124 | -0.75121 | 0.452524 | 0.550387 | 24.39389 | 19.15941 | 27.82925 | 13.39276 | 21.39111 | 18.08963 |
| 21909 | PRDM16    | 19.84574 | -0.42534 | 0.572401 | -0.74308 | 0.457432 | 0.55506  | 24.39389 | 22.44388 | 20.87194 | 22.32127 | 14.97377 | 14.06971 |
| 7308  | RNF217    | 2312.782 | -0.42566 | 0.117169 | -3.6329  | 0.00028  | 0.001019 | 2488.719 | 3046.347 | 2418.362 | 1966.504 | 2000.068 | 1956.695 |
| 8644  | CUNH5orf1 | 710.4829 | -0.42568 | 0.132341 | -3.21651 | 0.001298 | 0.003991 | 807.7087 | 780.6092 | 851.5752 | 589.2815 | 675.959  | 557.7636 |
| 17270 | LOC103235 | 127.323  | -0.42575 | 0.292452 | -1.45579 | 0.145451 | 0.223904 | 167.5047 | 97.4393  | 171.8456 | 118.3027 | 113.3729 | 95.47305 |
| 19368 | LOC119625 | 61.39815 | -0.42581 | 0.378457 | -1.12511 | 0.260542 | 0.357626 | 93.78094 | 47.07742 | 70.26887 | 55.80317 | 49.19955 | 52.25893 |
| 7904  | LOC103235 | 1363.422 | -0.42585 | 0.123911 | -3.43678 | 0.000589 | 0.00198  | 1593.734 | 1390.426 | 1704.542 | 1093.742 | 1268.493 | 1129.597 |
| 15454 | ZIC3      | 129.3261 | -0.42628 | 0.24341  | -1.75127 | 0.079899 | 0.13746  | 131.727  | 169.1503 | 144.0164 | 107.1421 | 113.3729 | 110.5477 |
| 9751  | TMEM1261  | 793.7217 | -0.42633 | 0.146167 | -2.91676 | 0.003537 | 0.009643 | 975.7555 | 769.661  | 983.7642 | 638.3883 | 746.5496 | 648.2118 |
| 24489 | TRNAS-GC1 | 4.643473 | -0.42638 | 1.282581 | -0.33244 | 0.739558 | 0.802833 | 2.168345 | 4.926706 | 9.044508 | 6.696381 | 0        | 5.024897 |
| 10036 | MBD2      | 6291.377 | -0.42642 | 0.149402 | -2.8542  | 0.004314 | 0.011428 | 6206.889 | 9297.79  | 6139.134 | 5332.551 | 5268.63  | 5503.268 |
| 8477  | SLC7A6    | 1233.496 | -0.42661 | 0.130829 | -3.26078 | 0.001111 | 0.003484 | 1454.418 | 1390.426 | 1408.16  | 959.8146 | 954.0434 | 1234.115 |
| 9616  | MYDGF     | 1190.232 | -0.42662 | 0.144302 | -2.95641 | 0.003112 | 0.008606 | 1565.545 | 1139.711 | 1393.55  | 919.6363 | 1022.495 | 1100.453 |
| 8322  | ZC3HAV1L  | 1337.047 | -0.42665 | 0.128986 | -3.30775 | 0.00094  | 0.003004 | 1606.202 | 1415.06  | 1586.963 | 1006.689 | 1105.92  | 1301.448 |
| 8220  | RPUSD2    | 888.268  | -0.42674 | 0.127725 | -3.3411  | 0.000834 | 0.002699 | 1066.826 | 924.5786 | 1068.643 | 758.9232 | 701.6283 | 809.0085 |
| 6246  | REPIN1    | 6515.094 | -0.42697 | 0.105346 | -4.053   | 5.06E-05 | 0.000215 | 7855.916 | 6961.436 | 7606.431 | 5656.21  | 4960.598 | 6049.976 |
| 18916 | GCK       | 64.41535 | -0.42711 | 0.355548 | -1.20126 | 0.229649 | 0.322754 | 78.06044 | 58.57306 | 83.48776 | 53.57105 | 70.59065 | 42.20914 |
| 11663 | LOC103245 | 318.7872 | -0.42734 | 0.172407 | -2.47869 | 0.013187 | 0.030058 | 378.9184 | 337.7531 | 383.348  | 276.7837 | 237.4413 | 298.4789 |
| 11961 | IMMP1L    | 910.7285 | -0.42734 | 0.177159 | -2.4122  | 0.015856 | 0.035244 | 1205.6   | 764.1869 | 1163.959 | 854.9046 | 705.9065 | 769.8143 |
| 7757  | LOC103215 | 765.0211 | -0.42736 | 0.122923 | -3.47663 | 0.000508 | 0.00174  | 913.9576 | 872.027  | 849.488  | 607.1385 | 663.1243 | 684.391  |
| 7358  | UBE2D4    | 1278.115 | -0.42742 | 0.118271 | -3.61392 | 0.000302 | 0.00109  | 2268.631 | 2845.994 | 2378.01  | 1962.04  | 1816.105 | 1797.908 |
| 8090  | GEMIN4    | 1167.829 | -0.42753 | 0.126367 | -3.38323 | 0.000716 | 0.002354 | 1417.556 | 1217.991 | 1390.071 | 924.1006 | 949.7651 | 1107.487 |
| 23825 | LOC119625 | 7.056364 | -0.42768 | 0.985854 | -0.43382 | 0.664421 | 0.741391 | 11.9259  | 3.831883 | 8.348776 | 8.928508 | 4.278221 | 5.024897 |
| 5142  | ZNF518A   | 3679.819 | -0.4278  | 0.092856 | -4.60716 | 4.08E-06 | 2.11E-05 | 4148.045 | 4504.104 | 4012.283 | 3069.175 | 3193.692 | 3151.616 |
| 5079  | THOC3     | 3071.857 | -0.42781 | 0.092127 | -4.64374 | 3.42E-06 | 1.79E-05 | 3389.666 | 3722.948 | 3457.785 | 2669.624 | 2603.298 | 2587.822 |
| 7089  | DIP2A     | 2230.074 | -0.42795 | 0.115621 | -3.70135 | 0.000214 | 0.000804 | 2841.075 | 2330.332 | 2509.503 | 1810.255 | 1831.079 | 2058.198 |
| 7833  | SMC2      | 8043.65  | -0.42811 | 0.123821 | -3.45752 | 0.000545 | 0.00185  | 8454.921 | 11056.62 | 8175.539 | 6613.792 | 6838.737 | 7122.289 |
| 13234 | LOC103215 | 197.1408 | -0.42819 | 0.198111 | -2.16138 | 0.030666 | 0.061603 | 238.518  | 218.4173 | 220.5468 | 185.2665 | 158.2942 | 161.8017 |
| 6074  | NOL10     | 1924.505 | -0.42821 | 0.103564 | -4.13472 | 3.55E-05 | 0.000156 | 2129.315 | 2396.022 | 2099.022 | 1640.613 | 1627.863 | 1654.196 |
| 5725  | LOC103245 | 9983.122 | -0.42848 | 0.099391 | -4.31104 | 1.62E-05 | 7.55E-05 | 12152.49 | 10326.38 | 11891.44 | 8399.494 | 8107.229 | 9021.701 |
| 12425 | BAD       | 1563.317 | -0.42849 | 0.184994 | -2.31624 | 0.020545 | 0.043959 | 2083.238 | 1224.013 | 2076.062 | 1408.472 | 1170.094 | 1418.026 |
| 5836  | DONSON    | 2657.637 | -0.42854 | 0.100707 | -4.25529 | 2.09E-05 | 9.51E-05 | 2909.378 | 3279.544 | 2963.816 | 2154.003 | 2265.318 | 2373.762 |
| 6358  | IPO4      | 5774.612 | -0.42857 | 0.1071   | -4.00159 | 6.29E-05 | 0.000263 | 6922.443 | 6274.434 | 6690.153 | 4912.911 | 4376.62  | 5471.108 |
| 5987  | COL4A4    | 2481.128 | -0.42869 | 0.102811 | -4.1697  | 3.05E-05 | 0.000135 | 2816.139 | 3043.61  | 2686.915 | 2037.932 | 2044.99  | 2257.184 |
| 21355 | LOC119625 | 24.23447 | -0.4287  | 0.520709 | -0.8233  | 0.410339 | 0.51081  | 27.10432 | 26.27577 | 30.61218 | 22.32127 | 14.97377 | 24.11951 |
| 17837 | LOC103225 | 115.2534 | -0.42871 | 0.31266  | -1.37116 | 0.170324 | 0.253857 | 106.2489 | 187.7623 | 101.5768 | 102.6778 | 104.8164 | 88.43819 |
| 22593 | LOC103235 | 14.85031 | -0.42891 | 0.685563 | -0.62563 | 0.531561 | 0.625499 | 11.9259  | 16.96977 | 21.56767 | 15.62489 | 14.97377 | 8.039836 |
| 9065  | PRPF4B    | 8704.731 | -0.42903 | 0.138786 | -3.0913  | 0.001993 | 0.005844 | 8799.146 | 12530.26 | 8640.288 | 7348.162 | 7251.585 | 7658.949 |
| 4935  | EIF4EBP1  | 3172.674 | -0.4291  | 0.090835 | -4.72394 | 2.31E-06 | 1.25E-05 | 3781.052 | 3538.47  | 3608.063 | 2647.303 | 2648.219 | 2812.938 |
| 5817  | LOC103225 | 1960.516 | -0.42929 | 0.100645 | -4.26537 | 2.00E-05 | 9.12E-05 | 2165.093 | 2372.483 | 2208.251 | 1743.291 | 1677.063 | 1596.912 |
| 25666 | TRNAK-UU  | 0.810235 | -0.42932 | 3.064452 | -0.1401  | 0.888584 | 0.920365 | 0.542086 | 0        | 2.087194 | 2.232127 | 0        | 0        |
| 25667 | LOC119625 | 0.810235 | -0.42932 | 3.064452 | -0.1401  | 0.888584 | 0.920365 | 0.542086 | 0        | 2.087194 | 2.232127 | 0        | 0        |
| 8327  | ODF2      | 3122.002 | -0.42965 | 0.129958 | -3.30609 | 0.000946 | 0.00302  | 3262.276 | 4313.058 | 3176.014 | 2669.624 | 2575.489 | 2735.554 |
| 8522  | CIZ1      | 2481.033 | -0.42975 | 0.132257 | -3.24934 | 0.001157 | 0.003608 | 2560.274 | 3423.513 | 2561.683 | 2026.771 | 2107.024 | 2206.935 |
| 4775  | DPY19L4   | 4153.159 | -0.42993 | 0.089063 | -4.82726 | 1.38E-06 | 7.71E-06 | 4816.437 | 4635.483 | 4856.205 | 3361.583 | 3550.924 | 3698.324 |
| 7156  | COG1      | 1333.346 | -0.43008 | 0.116928 | -3.67817 | 0.000235 | 0.000873 | 1510.253 | 1682.744 | 1400.507 | 1145.081 | 1086.668 | 1174.821 |
| 6651  | STK4      | 4195.509 | -0.43014 | 0.110911 | -3.87823 | 0.000105 | 0.000421 | 4580.63  | 5419.377 | 4454.072 | 3504.439 | 3375.517 | 3839.022 |
| 23451 | LOC119625 | 11.05355 | -0.43039 | 0.873908 | -0.49249 | 0.622373 | 0.705547 | 14.63633 | 16.96977 | 5.565851 | 11.16063 | 14.97377 | 3.014938 |
| 14911 | ASIC1     | 175.4974 | -0.43044 | 0.232416 | -1.85203 | 0.064021 | 0.114147 | 166.4205 | 231.0078 | 204.545  | 162.9453 | 160.4333 | 127.6324 |
| 14459 | CCDC28B   | 238.5613 | -0.43052 | 0.222778 | -1.93251 | 0.053297 | 0.097995 | 312.2417 | 215.1328 | 294.2944 | 238.8376 | 166.8506 | 204.0108 |
| 4309  | SEC23A    | 9881.905 | -0.43055 | 0.083591 | -5.15062 | 2.60E-07 | 1.60E-06 | 11311.72 | 11634.14 | 11097.61 | 8127.174 | 8271.941 | 8848.844 |
| 6623  | IMP4      | 2113.794 | -0.43055 | 0.11063  | -3.89178 | 9.95E-05 | 0.000399 | 2536.422 | 2179.794 | 2568.64  | 1814.719 | 1696.315 | 1887.351 |
| 6015  | KIAA0753  | 1981.799 | -0.43061 | 0.103556 | -4.15826 | 3.21E-05 | 0.000142 | 2235.564 | 2408.612 | 2187.379 | 1595.971 | 1666.367 | 1796.903 |
| 5889  | LOC103245 | 7765.862 | -0.43068 | 0.102048 | -4.22039 | 2.44E-05 | 0.00011  | 8888.59  | 9335.014 | 8534.537 | 6562.453 | 5972.397 | 7302.181 |
| 14256 | TMEM44    | 157.8693 | -0.43086 | 0.218973 | -1.96763 | 0.049111 | 0.091575 | 194.0669 | 171.3399 | 177.4115 | 149.5525 | 126.2075 | 128.6374 |
| 8564  | FOXJ3     | 2818.165 | -0.43096 | 0.133086 | -3.23821 | 0.001203 | 0.003734 | 2895.825 | 3930.417 | 2881.719 | 2370.519 | 2406.5   | 2424.01  |
| 11999 | LOC103235 | 267.1716 | -0.43124 | 0.179195 | -2.40653 | 0.016105 | 0.035679 | 331.2148 | 287.3912 | 300.556  | 216.5163 | 250.2759 | 217.0756 |
| 12951 | HOXC8     | 524.3022 | -0.43165 | 0.195081 | -2.21268 | 0.02692  | 0.055255 | 482.999  | 772.9455 | 550.3235 | 499.9964 | 389.3181 | 450.2308 |
| 6010  | VMP1      | 19404.43 | -0.43167 | 0.103774 | -4.15971 | 3.19E-05 | 0.000141 | 20808.53 | 25433.3  | 20615.91 | 16341.4  | 16642.28 | 16585.18 |
| 23855 | LOC103235 | 6.231173 | -0.43187 | 1.005903 | -0.42934 | 0.667678 | 0.744088 | 5.420864 | 10.40082 | 5.565851 | 6.696381 | 4.278221 | 5.024897 |
| 8739  | VEZF1     | 4110.875 | -0.43198 | 0.135351 | -3.19153 | 0.001415 | 0.004305 | 4259.715 | 5768.078 | 4140.297 | 3437.476 | 3324.178 | 3735.509 |
| 9307  | CUNH12orf | 479.4826 | -0.432   | 0.142524 | -3.03103 | 0.002437 | 0.006959 | 572.4432 | 516.2093 | 564.9339 | 381.6937 | 423.5439 | 418.0715 |
| 25658 | LOC103225 | 0.811122 | -0.43204 | 3.063568 | -0.14102 | 0.887851 | 0.919892 | 0        | 0.547412 | 2.087194 | 2.232127 | 0        | 0        |
| 25659 | LOC103235 | 0.811122 | -0.43204 | 3.063568 | -0.14102 | 0.887851 | 0.919892 | 0        | 0.547412 | 2.087194 | 2.232127 | 0        | 0        |
| 5394  | MAPKAPK5  | 1733.982 | -0.43207 | 0.096762 | -4.4653  | 8.00E-06 | 3.94E-05 | 1976.989 | 1997.506 | 2004.402 | 1441.954 | 1452.456 | 1530.584 |
| 4957  | MRPL51    | 4035.468 | -0.43211 | 0.091731 | -4.71065 | 2.47E-06 | 1.32E-05 | 4745.966 | 4316.89  | 4842.986 | 3435.243 | 3456.803 | 3414.92  |
| 7007  | OSMR      | 18486.23 | -0.43215 | 0.115848 | -3.73036 | 0.000191 | 0.000725 | 19780.19 | 24732.61 | 19195.23 | 15263.28 | 15010.14 | 16935.91 |
| 8999  | MRPL47    | 1764.103 | -0.43221 | 0.138681 | -        |          |          |          |          |          |          |          |          |



|       |           |          |          |          |          |          |          |          |          |          |          |          |          |
|-------|-----------|----------|----------|----------|----------|----------|----------|----------|----------|----------|----------|----------|----------|
| 20196 | LOC103246 | 40.60719 | -0.43261 | 0.433787 | -0.99729 | 0.318622 | 0.419418 | 46.61943 | 53.64636 | 41.04815 | 35.71403 | 21.39111 | 45.22408 |
| 7377  | PBRM1     | 5775.914 | -0.43289 | 0.119975 | -3.60815 | 0.000308 | 0.001111 | 6086.004 | 7843.316 | 5980.507 | 4819.162 | 4832.251 | 5094.241 |
| 9077  | C2CD2     | 517.329  | -0.43298 | 0.14013  | -3.08987 | 0.002002 | 0.005865 | 591.9583 | 607.6271 | 587.893  | 404.015  | 432.1004 | 480.3802 |
| 8509  | ETS2      | 759.1233 | -0.43327 | 0.133136 | -3.25437 | 0.001136 | 0.003551 | 874.9274 | 939.3587 | 807.0484 | 620.5313 | 605.3683 | 707.5055 |
| 9662  | FUZ       | 422.3683 | -0.43352 | 0.147284 | -2.94342 | 0.003246 | 0.008931 | 493.2986 | 455.994  | 508.5796 | 352.6761 | 350.8141 | 372.8474 |
| 6614  | ZNF598    | 1352.271 | -0.43356 | 0.111271 | -3.89643 | 9.76E-05 | 0.000392 | 1533.02  | 1488.413 | 1646.1   | 1129.456 | 1084.529 | 1232.105 |
| 9421  | TXNL4B    | 504.68   | -0.4336  | 0.144405 | -3.0027  | 0.002676 | 0.007551 | 585.9954 | 551.7911 | 600.4162 | 399.5507 | 481.2999 | 409.0266 |
| 5034  | NOP16     | 2972.6   | -0.43363 | 0.092833 | -4.67115 | 3.00E-06 | 1.58E-05 | 3449.838 | 3289.945 | 3512.748 | 2542.393 | 2408.639 | 2632.041 |
| 6181  | KIRREL1   | 9576.518 | -0.43369 | 0.106162 | -4.08517 | 4.40E-05 | 0.000189 | 10434.62 | 11785.78 | 10805.4  | 7674.053 | 7593.843 | 9165.413 |
| 6009  | USP32     | 5921.069 | -0.43372 | 0.10425  | -4.16036 | 3.18E-05 | 0.000141 | 6527.262 | 7544.43  | 6347.157 | 4903.983 | 4810.86  | 5392.72  |
| 5776  | RRAS2     | 4376.619 | -0.43376 | 0.101192 | -4.28653 | 1.81E-05 | 8.35E-05 | 4801.259 | 5574.842 | 4712.189 | 3819.169 | 3625.793 | 3726.464 |
| 24026 | LOC103246 | 5.369938 | -0.43385 | 1.077185 | -0.40276 | 0.687123 | 0.760334 | 7.589209 | 4.379295 | 6.261582 | 6.696381 | 4.278221 | 3.014938 |
| 5392  | KIF1C     | 5253.166 | -0.43393 | 0.097138 | -4.46709 | 7.93E-06 | 3.91E-05 | 5816.587 | 6527.886 | 5773.179 | 4314.701 | 4338.116 | 4748.528 |
| 6863  | LOC103236 | 1914.838 | -0.43397 | 0.11445  | -3.79173 | 0.00015  | 0.000579 | 2293.025 | 1950.428 | 2355.051 | 1691.952 | 1659.95  | 1538.624 |
| 6165  | SMARCB1   | 2455.189 | -0.43399 | 0.106058 | -4.09199 | 4.28E-05 | 0.000184 | 2768.977 | 2900.188 | 2803.797 | 2078.11  | 1886.696 | 2293.363 |
| 7940  | ANAPC5    | 3840.12  | -0.4341  | 0.126675 | -3.42692 | 0.00061  | 0.002044 | 4906.966 | 3816.008 | 4524.341 | 3249.977 | 2896.356 | 3647.07  |
| 25264 | ADM2      | 1.662265 | -0.43451 | 2.120725 | -0.20489 | 0.837661 | 0.881461 | 1.084173 | 1.642235 | 2.782925 | 4.464254 | 0        | 0        |
| 19441 | LOC119626 | 48.92475 | -0.43465 | 0.391268 | -1.11088 | 0.266619 | 0.364594 | 59.6295  | 64.59459 | 44.52681 | 31.24978 | 51.33866 | 42.20914 |
| 6164  | SCMH1     | 2716.446 | -0.43466 | 0.106211 | -4.0924  | 4.27E-05 | 0.000184 | 3164.158 | 3311.841 | 2897.025 | 2316.948 | 2128.415 | 2480.289 |
| 10941 | PIM3      | 685.8645 | -0.43468 | 0.164596 | -2.6409  | 0.008269 | 0.020092 | 870.5907 | 634.4503 | 863.4026 | 598.21   | 513.3866 | 635.147  |
| 10765 | WAC       | 9738.287 | -0.43469 | 0.162424 | -2.67627 | 0.007445 | 0.018385 | 9223.057 | 15002.92 | 9357.587 | 8133.871 | 8214.185 | 8498.106 |
| 7811  | CEP120    | 1660.124 | -0.43476 | 0.125554 | -3.46273 | 0.000535 | 0.00182  | 1805.148 | 2213.186 | 1706.629 | 1374.99  | 1441.761 | 1419.031 |
| 9128  | LOC103226 | 1141.021 | -0.43488 | 0.141509 | -3.07313 | 0.002118 | 0.006169 | 1222.947 | 1522.9   | 1184.831 | 1091.51  | 930.5131 | 893.4267 |
| 12562 | FHAD1     | 266.1601 | -0.43495 | 0.189892 | -2.29053 | 0.021991 | 0.046539 | 287.3058 | 351.4384 | 276.9011 | 245.534  | 226.7457 | 209.0357 |
| 24857 | LOC103236 | 2.515512 | -0.43498 | 1.596738 | -0.27242 | 0.785302 | 0.839894 | 3.794605 | 2.737059 | 2.087194 | 4.464254 | 0        | 2.009959 |
| 5387  | COP58     | 4621.553 | -0.43498 | 0.097312 | -4.47    | 7.82E-06 | 3.86E-05 | 5149.821 | 5568.82  | 5225.638 | 4040.15  | 3587.289 | 4157.6   |
| 8486  | LOC103236 | 3159.457 | -0.43506 | 0.133493 | -3.25908 | 0.001118 | 0.003502 | 4120.941 | 2993.248 | 3787.562 | 2658.463 | 2459.977 | 2936.55  |
| 17195 | LOC119626 | 86.29412 | -0.43514 | 0.296359 | -1.46828 | 0.142028 | 0.219575 | 101.3702 | 100.7238 | 93.228   | 89.28508 | 74.86887 | 58.28881 |
| 18694 | CUNH11or  | 61.30696 | -0.43527 | 0.353948 | -1.22976 | 0.218787 | 0.31114  | 74.26583 | 58.02565 | 77.92191 | 49.10679 | 66.31243 | 42.20914 |
| 8153  | LOC103236 | 2944.218 | -0.43537 | 0.129409 | -3.36425 | 0.000768 | 0.002503 | 3013.458 | 4068.912 | 3072.35  | 2549.089 | 2462.116 | 2499.384 |
| 10820 | INTU      | 407.7019 | -0.43566 | 0.16341  | -2.66604 | 0.007675 | 0.018858 | 530.7026 | 433.5502 | 444.5723 | 314.7299 | 350.8141 | 371.8424 |
| 9547  | NEK8      | 758.0541 | -0.43578 | 0.14659  | -2.97276 | 0.002951 | 0.008218 | 906.9105 | 804.6954 | 910.7124 | 613.8349 | 560.447  | 751.7246 |
| 6809  | FMN1      | 3743.587 | -0.43581 | 0.11428  | -3.81347 | 0.000137 | 0.000535 | 3989.756 | 4959.551 | 3967.06  | 3091.496 | 3157.327 | 3296.333 |
| 5761  | FAM156B   | 2075.953 | -0.43583 | 0.101485 | -4.29452 | 1.75E-05 | 8.08E-05 | 2387.89  | 2276.138 | 2502.546 | 1767.845 | 1662.089 | 1859.212 |
| 10070 | ZCRB1     | 2393.679 | -0.43588 | 0.153168 | -2.84574 | 0.004431 | 0.011697 | 2291.941 | 3447.6   | 2513.677 | 2136.146 | 2147.667 | 1825.043 |
| 5327  | WDR75     | 4193.722 | -0.43606 | 0.096777 | -4.50584 | 6.61E-06 | 3.30E-05 | 4654.896 | 5204.792 | 4611.308 | 3374.976 | 3647.184 | 3669.18  |
| 5040  | PTBP1     | 5101.245 | -0.43625 | 0.093483 | -4.66669 | 3.06E-06 | 1.61E-05 | 5774.846 | 6109.663 | 5718.912 | 4508.897 | 3995.859 | 4499.293 |
| 5844  | PRPF40B   | 2208.282 | -0.43631 | 0.102629 | -4.2513  | 2.13E-05 | 9.67E-05 | 2510.944 | 2615.534 | 2500.459 | 1770.077 | 1807.549 | 2045.133 |
| 11055 | MARK1     | 722.374  | -0.43638 | 0.166944 | -2.6139  | 0.008951 | 0.021526 | 748.6213 | 1029.682 | 716.6033 | 587.0494 | 583.9772 | 668.3113 |
| 23330 | LOC103246 | 8.657034 | -0.43638 | 0.857607 | -0.50884 | 0.610866 | 0.695992 | 11.9259  | 9.853413 | 7.653045 | 8.928508 | 8.556443 | 5.024897 |
| 17300 | LOC119626 | 78.51516 | -0.43644 | 0.301368 | -1.44818 | 0.147567 | 0.226751 | 93.23886 | 96.34448 | 80.00911 | 75.89232 | 66.31243 | 59.29379 |
| 9185  | PJA1      | 511.1393 | -0.43652 | 0.142686 | -3.05926 | 0.002219 | 0.006422 | 577.8641 | 636.0925 | 551.0192 | 444.1933 | 406.431  | 451.2358 |
| 7136  | MPDZ      | 5268.307 | -0.43657 | 0.118484 | -3.68463 | 0.000229 | 0.000853 | 5774.304 | 7051.759 | 5355.044 | 4397.29  | 4306.03  | 4725.413 |
| 9918  | SAPCD2    | 918.1566 | -0.43672 | 0.151614 | -2.88046 | 0.003971 | 0.010644 | 1153.56  | 911.9881 | 1108.996 | 763.3874 | 669.5416 | 901.4666 |
| 24735 | LOC119626 | 2.845006 | -0.43727 | 1.492481 | -0.29298 | 0.769534 | 0.827089 | 4.878777 | 3.284471 | 1.391463 | 2.232127 | 4.278221 | 1.004979 |
| 19426 | LOC103226 | 46.89629 | -0.43734 | 0.392422 | -1.11447 | 0.265077 | 0.362765 | 43.36691 | 56.38342 | 61.22436 | 40.17829 | 47.06043 | 33.16432 |
| 6045  | LOC103226 | 1790.363 | -0.4376  | 0.10554  | -4.14627 | 3.38E-05 | 0.000149 | 2124.979 | 2028.161 | 2033.623 | 1424.097 | 1478.125 | 1653.191 |
| 4582  | LDHB      | 10505.68 | -0.43767 | 0.088384 | -4.95184 | 7.35E-07 | 4.27E-06 | 12496.17 | 12447.05 | 11319.55 | 9156.185 | 8502.965 | 9112.149 |
| 10671 | LOC103236 | 479.4729 | -0.43776 | 0.162189 | -2.69906 | 0.006954 | 0.017322 | 538.2918 | 496.5025 | 617.8095 | 383.9258 | 468.4652 | 371.8424 |
| 25081 | LOC103246 | 2.52184  | -0.43781 | 1.873716 | -0.23366 | 0.815251 | 0.864172 | 2.710432 | 0        | 6.261582 | 0        | 2.139111 | 4.019918 |
| 7182  | ATG10     | 1063.739 | -0.43804 | 0.119323 | -3.67103 | 0.000242 | 0.000894 | 1239.209 | 1122.194 | 1314.237 | 890.6187 | 868.4789 | 947.6956 |
| 10877 | HNRNPUL1  | 4481.395 | -0.43812 | 0.165045 | -2.65452 | 0.007942 | 0.019412 | 4434.267 | 6754.514 | 4285.01  | 3700.867 | 3420.438 | 4293.272 |
| 4895  | PSMG1     | 2590.58  | -0.43819 | 0.092359 | -4.74446 | 2.09E-06 | 1.14E-05 | 2869.263 | 3104.92  | 2966.599 | 2229.895 | 2216.119 | 2156.686 |
| 7233  | PIK3R1    | 5223.676 | -0.43823 | 0.119828 | -3.65721 | 0.000255 | 0.000937 | 5509.224 | 7084.604 | 5441.315 | 4308.005 | 4383.038 | 4615.871 |
| 25262 | LOC103236 | 1.606539 | -0.43824 | 2.136429 | -0.20513 | 0.837474 | 0.881333 | 1.084173 | 2.189647 | 2.087194 | 0        | 4.278221 | 0        |
| 11343 | IKZF5     | 676.8932 | -0.43851 | 0.17211  | -2.54782 | 0.01084  | 0.025405 | 684.113  | 982.0568 | 670.685  | 542.4069 | 603.2292 | 578.8682 |
| 7978  | IRF3      | 3166.434 | -0.43855 | 0.128318 | -3.41766 | 0.000632 | 0.002105 | 4010.355 | 3091.782 | 3836.263 | 2649.535 | 2427.891 | 2982.779 |
| 16283 | LOC103246 | 251.1983 | -0.43877 | 0.272397 | -1.61077 | 0.10723  | 0.175073 | 200.572  | 423.1493 | 244.2017 | 185.2665 | 228.8848 | 225.1154 |
| 14375 | LOC103236 | 166.8385 | -0.43879 | 0.22518  | -1.94863 | 0.05134  | 0.094947 | 170.2151 | 221.1544 | 184.3688 | 156.2489 | 128.3466 | 140.6971 |
| 23844 | LOC119626 | 6.346345 | -0.4388  | 1.017899 | -0.43108 | 0.666407 | 0.743014 | 5.96295  | 8.211177 | 8.348776 | 2.232127 | 4.278221 | 9.044815 |
| 9517  | KIAA0232  | 2051.46  | -0.4389  | 0.147293 | -2.97976 | 0.002885 | 0.008058 | 2130.942 | 2928.106 | 2025.97  | 1607.131 | 1792.575 | 1824.038 |
| 9364  | LRRC45    | 973.0063 | -0.43899 | 0.145576 | -3.01552 | 0.002565 | 0.007283 | 1187.169 | 986.4361 | 1193.179 | 794.6372 | 720.8803 | 955.7355 |
| 11715 | DOLPP1    | 328.7459 | -0.439   | 0.177852 | -2.46837 | 0.013573 | 0.030802 | 380.0025 | 364.0289 | 395.1754 | 287.9444 | 226.7457 | 318.5785 |
| 8239  | BAZ1A     | 4853.38  | -0.43905 | 0.131654 | -3.33488 | 0.000853 | 0.002753 | 5146.568 | 6786.812 | 4826.984 | 3950.865 | 4117.788 | 4291.262 |
| 15161 | MTMR8     | 124.2836 | -0.4391  | 0.243425 | -1.80382 | 0.071259 | 0.124954 | 158.2892 | 136.853  | 134.9719 | 98.21359 | 104.8164 | 112.5577 |
| 7499  | LOC103236 | 1448.624 | -0.43918 | 0.123322 | -3.56125 | 0.000369 | 0.001308 | 1619.754 | 1849.705 | 1538.262 | 1194.188 | 1140.146 | 1349.687 |
| 6153  | RIC8B     | 1101.632 | -0.4392  | 0.107255 | -4.09491 | 4.22E-05 | 0.000182 | 1257.64  | 1294.082 | 1255.099 | 919.6363 | 915.5394 | 967.7952 |
| 9341  | MAN2C1    | 1982.543 | -0.43927 | 0.145415 | -3.0208  | 0.002521 | 0.007175 | 2658.392 | 1831.093 | 2361.312 | 1584.81  | 1606.472 | 1853.182 |
| 5673  | BNIP2     | 5137.056 | -0.43932 | 0.101262 | -4.33843 | 1.44E-05 | 6.73E-05 | 5690.823 | 6473.692 | 5576.287 | 4558.003 | 4066.449 | 4457.084 |
| 15516 | LOC119626 | 158.493  | -0.43939 | 0.252499 | -1.74018 | 0.081828 | 0.140204 | 216.8345 | 142.3271 | 186.456  | 129.4634 | 158.2942 | 117.5826 |
| 12005 | PDCD2L    | 306.1299 | -0.43969 | 0.182834 | -2.40485 | 0.016179 | 0.035828 | 372.9554 | 318.0463 | 3        |          |          |          |



|       |           |          |          |          |          |          |          |          |          |          |          |          |          |
|-------|-----------|----------|----------|----------|----------|----------|----------|----------|----------|----------|----------|----------|----------|
| 8694  | LRRC8B    | 840.3992 | -0.43993 | 0.137256 | -3.20518 | 0.00135  | 0.004127 | 939.4357 | 1091.539 | 873.1429 | 743.2983 | 650.2896 | 744.6898 |
| 19607 | LOC119622 | 44.34264 | -0.44002 | 0.405617 | -1.08481 | 0.278006 | 0.376946 | 47.7036  | 47.62483 | 56.35424 | 40.17829 | 47.06043 | 27.13445 |
| 7167  | SMARCD1   | 2439.014 | -0.44038 | 0.119823 | -3.6752  | 0.000238 | 0.000882 | 2671.402 | 3102.183 | 2658.39  | 2055.789 | 1843.913 | 2302.408 |
| 18057 | LOC103222 | 64.62094 | -0.44045 | 0.33046  | -1.33284 | 0.182586 | 0.268818 | 71.01331 | 79.92212 | 73.05179 | 42.41041 | 62.03421 | 59.29379 |
| 6174  | RBM5      | 5874.729 | -0.44047 | 0.107729 | -4.08869 | 4.34E-05 | 0.000187 | 6397.703 | 7703.179 | 6194.792 | 4888.358 | 4934.928 | 5129.415 |
| 23358 | THBD      | 10.27558 | -0.44058 | 0.872129 | -0.50518 | 0.613431 | 0.698179 | 6.505036 | 15.32753 | 13.2189  | 4.464254 | 17.11289 | 5.024897 |
| 14974 | LOC103234 | 141.4069 | -0.44073 | 0.239671 | -1.83891 | 0.065929 | 0.117051 | 145.8212 | 180.6459 | 160.0182 | 120.5349 | 136.9031 | 104.5179 |
| 6007  | LOC119622 | 1166.361 | -0.44095 | 0.105971 | -4.16104 | 3.17E-05 | 0.00014  | 1309.139 | 1341.706 | 1378.94  | 964.2789 | 1018.217 | 985.8849 |
| 22817 | LOC103222 | 11.76737 | -0.44116 | 0.748013 | -0.58978 | 0.55534  | 0.647049 | 17.34676 | 10.40082 | 13.2189  | 11.16063 | 6.417332 | 12.05975 |
| 7120  | SRSF11    | 9301.785 | -0.44127 | 0.119598 | -3.68962 | 0.000225 | 0.000839 | 10013.42 | 12598.14 | 9532.216 | 7549.053 | 7707.216 | 8410.673 |
| 9943  | SRGAP1    | 2118.919 | -0.44127 | 0.153414 | -2.87635 | 0.004023 | 0.010757 | 2035.534 | 3090.14  | 2197.815 | 1747.755 | 1734.819 | 1907.451 |
| 6194  | TUBE1     | 1049.699 | -0.4413  | 0.108248 | -4.07677 | 4.57E-05 | 0.000196 | 1243.546 | 1192.263 | 1191.092 | 872.7616 | 909.122  | 889.4068 |
| 13270 | ALX1      | 218.3126 | -0.44132 | 0.204867 | -2.15418 | 0.031226 | 0.062559 | 216.8345 | 286.8438 | 249.7676 | 176.338  | 203.2155 | 176.8764 |
| 11507 | LOC119622 | 291.7814 | -0.44142 | 0.175636 | -2.51324 | 0.011963 | 0.027638 | 337.1777 | 309.8351 | 363.8675 | 223.2127 | 250.2759 | 266.3196 |
| 22415 | LOC103218 | 14.54022 | -0.44146 | 0.674718 | -0.65429 | 0.512925 | 0.608348 | 15.17842 | 19.15941 | 15.30609 | 17.85702 | 10.69555 | 9.044815 |
| 7667  | CSRN1P1   | 1404.541 | -0.44146 | 0.125999 | -3.50369 | 0.000459 | 0.001591 | 1746.602 | 1452.831 | 1660.711 | 1095.974 | 1146.563 | 1324.563 |
| 5412  | GEM       | 2119.022 | -0.44152 | 0.099093 | -4.45561 | 8.37E-06 | 4.11E-05 | 2534.254 | 2388.358 | 2402.36  | 1854.898 | 1677.063 | 1857.202 |
| 5280  | MID1P1    | 2386.218 | -0.44157 | 0.097437 | -4.53183 | 5.85E-06 | 2.94E-05 | 2670.86  | 2868.438 | 2711.961 | 1982.129 | 1942.312 | 2141.611 |
| 11013 | LOC103222 | 2839.155 | -0.44159 | 0.168116 | -2.62668 | 0.008622 | 0.020814 | 2665.981 | 4261.601 | 2878.936 | 2435.251 | 2686.723 | 2106.437 |
| 8518  | SYNRG     | 4342.468 | -0.44164 | 0.13578  | -3.2526  | 0.001144 | 0.003569 | 4550.815 | 6099.262 | 4359.453 | 3495.511 | 3568.037 | 3981.729 |
| 6953  | OTUD4     | 7282.308 | -0.44174 | 0.117648 | -3.75476 | 0.000174 | 0.000663 | 7745.872 | 9839.727 | 7582.776 | 6109.332 | 5936.032 | 6480.108 |
| 9304  | PSMA7     | 6616.601 | -0.44197 | 0.145798 | -3.03141 | 0.002434 | 0.006955 | 8935.21  | 5760.415 | 8173.452 | 5629.424 | 5319.968 | 5881.14  |
| 7481  | SPECC1    | 1169.732 | -0.44197 | 0.123804 | -3.56993 | 0.000357 | 0.001269 | 1261.435 | 1525.637 | 1254.404 | 1008.921 | 986.13   | 981.8649 |
| 10612 | SEPTIN5   | 369.0596 | -0.44212 | 0.162637 | -2.71843 | 0.006559 | 0.016432 | 417.4065 | 447.7829 | 414.6559 | 279.0159 | 303.7537 | 351.7428 |
| 22000 | MAGEA11   | 23.07223 | -0.44231 | 0.607973 | -0.72751 | 0.466913 | 0.564221 | 26.56223 | 23.53871 | 28.52499 | 13.39276 | 36.36488 | 10.04979 |
| 25316 | UBQLN3    | 1.304757 | -0.44263 | 2.24627  | -0.19705 | 0.843789 | 0.886076 | 1.084173 | 1.642235 | 2.087194 | 0        | 0        | 3.014938 |
| 18019 | LOC103222 | 78.47674 | -0.44268 | 0.330337 | -1.34009 | 0.180215 | 0.265887 | 106.2489 | 94.15483 | 69.57314 | 58.0353  | 85.56443 | 57.28383 |
| 20773 | LOC103218 | 34.22408 | -0.44272 | 0.48789  | -0.90743 | 0.364181 | 0.466069 | 50.41403 | 33.39212 | 33.39511 | 44.64254 | 21.39111 | 22.10955 |
| 21621 | LOC103218 | 20.52695 | -0.44279 | 0.562604 | -0.78703 | 0.431263 | 0.530277 | 19.51511 | 27.37059 | 24.3506  | 17.85702 | 14.97377 | 19.09461 |
| 5778  | RFX5      | 2621.928 | -0.44292 | 0.103356 | -4.28542 | 1.82E-05 | 8.39E-05 | 2964.128 | 3256.553 | 2847.629 | 2214.27  | 2096.328 | 2352.657 |
| 23632 | LOC119622 | 7.21299  | -0.44295 | 0.955103 | -0.46377 | 0.64281  | 0.723122 | 7.047123 | 9.306001 | 9.044508 | 6.696381 | 2.139111 | 9.044815 |
| 4730  | NUP54     | 2574.904 | -0.44317 | 0.091117 | -4.86376 | 1.15E-06 | 6.47E-06 | 2927.266 | 3000.912 | 2977.035 | 2200.877 | 2094.189 | 2249.144 |
| 9160  | RHNO1     | 3145.152 | -0.44325 | 0.144688 | -3.06345 | 0.002188 | 0.00635  | 3158.737 | 4560.488 | 3153.055 | 2718.731 | 2658.915 | 2620.986 |
| 5446  | SNX5      | 5489.174 | -0.44334 | 0.099816 | -4.44161 | 8.93E-06 | 4.36E-05 | 6035.59  | 6984.975 | 5957.548 | 4805.769 | 4495.907 | 4693.254 |
| 9525  | ST3GAL3   | 496.9166 | -0.44348 | 0.148928 | -2.97784 | 0.002903 | 0.008102 | 622.3152 | 552.8859 | 545.4534 | 435.2648 | 374.3444 | 451.2358 |
| 9233  | CUTC      | 587.5695 | -0.44366 | 0.145621 | -3.0467  | 0.002314 | 0.006662 | 726.9378 | 593.3944 | 711.0375 | 470.9788 | 532.6386 | 490.43   |
| 7526  | RASGEF1C  | 725.8677 | -0.44372 | 0.124977 | -3.55043 | 0.000385 | 0.001359 | 832.1026 | 814.5488 | 866.8813 | 618.2992 | 571.1425 | 652.2317 |
| 9533  | TUBD1     | 463.345  | -0.44379 | 0.149125 | -2.97597 | 0.002921 | 0.008145 | 576.7799 | 535.9162 | 489.7949 | 412.9435 | 363.6488 | 400.9868 |
| 18655 | LOC119622 | 56.89378 | -0.44383 | 0.359916 | -1.23314 | 0.217524 | 0.310012 | 62.88202 | 67.87906 | 64.00729 | 55.80317 | 55.61688 | 35.17428 |
| 5045  | GLO1      | 6865.358 | -0.44413 | 0.095246 | -4.66302 | 3.12E-06 | 1.64E-05 | 8218.029 | 7166.715 | 8355.734 | 5790.137 | 5938.171 | 5723.358 |
| 23895 | LOC103218 | 5.849718 | -0.44418 | 1.048616 | -0.42359 | 0.671866 | 0.747502 | 3.794605 | 6.568942 | 9.740239 | 6.696381 | 4.278221 | 4.019918 |
| 8210  | MCAM      | 644.4553 | -0.44422 | 0.132855 | -3.34365 | 0.000827 | 0.002677 | 757.2947 | 786.6308 | 687.3826 | 533.4783 | 524.0821 | 577.8632 |
| 6722  | DDX23     | 6694.085 | -0.44424 | 0.115465 | -3.84736 | 0.000119 | 0.000472 | 7374.001 | 8800.74  | 6980.969 | 5511.122 | 5304.994 | 6192.683 |
| 18258 | FAT4      | 78.03941 | -0.44429 | 0.343887 | -1.29195 | 0.196374 | 0.285936 | 78.60252 | 95.24966 | 94.61947 | 49.10679 | 98.39909 | 52.25893 |
| 12510 | ABCB8     | 1522.028 | -0.44431 | 0.193234 | -2.29931 | 0.021487 | 0.045662 | 2079.985 | 1221.276 | 1967.528 | 1254.455 | 1065.277 | 1543.648 |
| 10259 | CCAR1     | 6803.883 | -0.44431 | 0.158748 | -2.79885 | 0.005128 | 0.01329  | 6580.386 | 10375.64 | 6574.661 | 5707.549 | 5653.669 | 5931.389 |
| 10884 | SPAG1     | 607.4652 | -0.44433 | 0.167467 | -2.65325 | 0.007972 | 0.019473 | 641.8303 | 858.8891 | 600.4162 | 482.1394 | 536.9168 | 524.5993 |
| 11032 | LCMT2     | 313.5007 | -0.44477 | 0.169585 | -2.62267 | 0.008724 | 0.021022 | 351.8141 | 354.7229 | 381.2608 | 234.3733 | 267.3888 | 291.444  |
| 16627 | LOC103222 | 195.8014 | -0.44477 | 0.286303 | -1.55351 | 0.120302 | 0.192352 | 189.1881 | 313.1196 | 171.8456 | 167.4095 | 209.6328 | 123.6125 |
| 7403  | REXO4     | 3441.336 | -0.44486 | 0.123606 | -3.59898 | 0.000319 | 0.001147 | 4259.715 | 3465.664 | 4186.216 | 2758.909 | 2678.167 | 3299.348 |
| 13454 | STRIP2    | 184.804  | -0.44489 | 0.210212 | -2.11641 | 0.03431  | 0.067796 | 234.7234 | 211.8484 | 192.7176 | 140.624  | 171.1289 | 157.7818 |
| 9241  | INAFM2    | 447.3792 | -0.4452  | 0.146228 | -3.04453 | 0.00233  | 0.006704 | 511.1874 | 541.3903 | 498.1437 | 368.301  | 357.2315 | 408.0217 |
| 5461  | ERCC2     | 1984.784 | -0.44528 | 0.100401 | -4.43498 | 9.21E-06 | 4.48E-05 | 2398.732 | 2208.807 | 2263.214 | 1660.702 | 1606.472 | 1770.774 |
| 8966  | MORN2     | 932.3369 | -0.44538 | 0.142431 | -3.127   | 0.001766 | 0.005236 | 988.2235 | 1158.871 | 1070.731 | 857.1368 | 857.7834 | 661.2765 |
| 5143  | WDR11     | 3273.599 | -0.44543 | 0.096691 | -4.60669 | 4.09E-06 | 2.11E-05 | 3885.133 | 3800.133 | 3646.328 | 2573.642 | 2778.705 | 2957.655 |
| 5072  | SPC24     | 4297.388 | -0.4455  | 0.09586  | -4.64745 | 3.36E-06 | 1.76E-05 | 5206.197 | 4755.914 | 4910.472 | 3683.01  | 3377.656 | 3851.081 |
| 17885 | LOC103222 | 66.01805 | -0.44552 | 0.326734 | -1.36354 | 0.172712 | 0.256726 | 75.89209 | 72.25836 | 79.31338 | 69.19594 | 49.19955 | 50.24897 |
| 9537  | CUNH1orf  | 549.9675 | -0.44564 | 0.149798 | -2.97497 | 0.00293  | 0.008168 | 705.7965 | 562.7393 | 637.2899 | 446.4254 | 447.0741 | 500.4798 |
| 9926  | OTULINL   | 523.6941 | -0.44567 | 0.154809 | -2.87886 | 0.003991 | 0.01069  | 622.8572 | 568.2135 | 615.0265 | 513.3892 | 442.7959 | 379.8822 |
| 24403 | LOC103218 | 4.190116 | -0.44572 | 1.286745 | -0.3464  | 0.729045 | 0.794233 | 1.084173 | 6.568942 | 6.957314 | 2.232127 | 4.278221 | 4.019918 |
| 5704  | CCNY      | 3094.314 | -0.44597 | 0.10311  | -4.32523 | 1.52E-05 | 7.10E-05 | 3494.289 | 3885.529 | 3331.162 | 2558.018 | 2524.151 | 2772.738 |
| 19643 | DND1      | 45.75286 | -0.44602 | 0.413591 | -1.0784  | 0.280856 | 0.380084 | 47.7036  | 47.07742 | 63.31155 | 53.57105 | 25.66933 | 37.18424 |
| 14069 | LOC103238 | 208.0329 | -0.44602 | 0.223018 | -1.99993 | 0.045508 | 0.085993 | 214.6662 | 284.6541 | 223.3298 | 142.8561 | 179.6853 | 203.0059 |
| 6039  | ASB7      | 1570.545 | -0.44604 | 0.107546 | -4.14746 | 3.36E-05 | 0.000148 | 1858.814 | 1867.222 | 1713.586 | 1261.152 | 1298.44  | 1424.056 |
| 7227  | BAP1      | 4194.979 | -0.4461  | 0.121914 | -3.65911 | 0.000253 | 0.000931 | 5244.144 | 4363.42  | 4916.038 | 3515.6   | 3101.71  | 4028.963 |
| 21964 | LOC119622 | 19.4895  | -0.44641 | 0.605777 | -0.73692 | 0.461169 | 0.558652 | 27.10432 | 15.87494 | 23.65487 | 17.85702 | 21.39111 | 11.05477 |
| 5360  | EIF3G     | 2177.728 | -0.4466  | 0.099582 | -4.48471 | 7.30E-06 | 3.62E-05 | 2911.004 | 3279.544 | 3213.583 | 2417.394 | 2207.562 | 2277.283 |
| 5629  | BEX1      | 1505.34  | -0.44673 | 0.102487 | -4.3589  | 1.31E-05 | 6.17E-05 | 1681.552 | 1822.334 | 1706.629 | 1296.866 | 1234.267 | 1290.394 |
| 5588  | DHX8      | 4894.447 | -0.44689 | 0.102081 | -4.37775 | 1.20E-05 | 5.70E-05 | 5780.809 | 5724.833 | 5441.315 | 4196.399 | 3704.94  | 4518.388 |
| 5522  | CLTC      | 52642.43 | -0.44689 | 0.10148  | -4.40373 | 1.06E-05 | 5.12E-05 | 58639.65 | 65665.33 | 57897.37 | 43441.66 | 41006.75 | 49203.79 |
| 7701  | TRMT1L    | 1685.279 | -0.4469  | 0.127937 | -3.49313 | 0.000477 |          |          |          |          |          |          |          |



|       |           |          |          |          |          |          |          |          |          |          |          |          |            |
|-------|-----------|----------|----------|----------|----------|----------|----------|----------|----------|----------|----------|----------|------------|
| 8364  | NTPCR     | 2153.335 | -0.4474  | 0.135828 | -3.29386 | 0.000988 | 0.003141 | 2736.994 | 2022.687 | 2696.655 | 1669.631 | 1901.669 | 1892.376   |
| 9505  | LOC103232 | 595.2113 | -0.44749 | 0.150007 | -2.98315 | 0.002853 | 0.00798  | 703.086  | 726.9629 | 632.4198 | 421.872  | 558.3079 | 528.6192   |
| 5959  | CIP2A     | 2991.124 | -0.44764 | 0.107031 | -4.18232 | 2.89E-05 | 0.000129 | 3262.818 | 3861.443 | 3227.498 | 2598.196 | 2530.568 | 2466.22    |
| 7031  | CER56     | 2292.556 | -0.44775 | 0.120294 | -3.7221  | 0.000198 | 0.000747 | 2435.052 | 3050.726 | 2452.453 | 1966.504 | 1839.635 | 2010.964   |
| 21086 | LOC103222 | 37.25238 | -0.44777 | 0.516292 | -0.86728 | 0.385787 | 0.486396 | 22.76763 | 68.97389 | 36.87376 | 37.94616 | 27.80844 | 29.1444    |
| 10213 | CNTRL     | 1469.825 | -0.44779 | 0.159218 | -2.81244 | 0.004917 | 0.012798 | 1508.084 | 2166.109 | 1414.422 | 1236.598 | 1221.432 | 1272.304   |
| 6470  | USP9X     | 21162.94 | -0.44786 | 0.113333 | -3.95173 | 7.76E-05 | 0.000319 | 22843.52 | 27892.82 | 22535.43 | 17185.15 | 16824.11 | 16966.59   |
| 8352  | NEK2      | 883.3842 | -0.44819 | 0.135957 | -3.29657 | 0.000979 | 0.003115 | 951.3616 | 1176.935 | 930.1928 | 752.2268 | 735.8541 | 753.7346   |
| 8319  | NRF1      | 726.2027 | -0.44834 | 0.135527 | -3.30812 | 0.000939 | 0.003002 | 923.1731 | 827.6867 | 761.8259 | 660.7096 | 581.8381 | 601.9827   |
| 6975  | SLC25A3   | 13950.38 | -0.44846 | 0.11975  | -3.74496 | 0.00018  | 0.000688 | 18100.26 | 13720.33 | 16489.53 | 11589.2  | 10885.93 | 12917      |
| 18561 | ITGA2B    | 61.24265 | -0.44848 | 0.361205 | -1.24162 | 0.214377 | 0.307052 | 67.7608  | 58.57306 | 84.1835  | 53.57105 | 64.17332 | 39.1942    |
| 16325 | LOC103215 | 266.3432 | -0.44878 | 0.280382 | -1.60059 | 0.109467 | 0.178266 | 390.8443 | 192.1415 | 342.9956 | 205.3557 | 173.268  | 293.454    |
| 12061 | LOC103245 | 249.24   | -0.44883 | 0.187412 | -2.39488 | 0.016626 | 0.036647 | 273.7536 | 318.5937 | 272.031  | 187.4987 | 222.4675 | 221.0955   |
| 22051 | LOC103225 | 17.8934  | -0.44886 | 0.626761 | -0.71616 | 0.473892 | 0.571349 | 19.51511 | 14.78012 | 27.13352 | 15.62489 | 19.252   | 11.05477   |
| 6091  | DNAJC9    | 3030.633 | -0.44903 | 0.108817 | -4.12646 | 3.68E-05 | 0.000161 | 3317.026 | 3945.197 | 3233.064 | 2515.607 | 2601.159 | 2571.742   |
| 6135  | ZNF121    | 2232.059 | -0.44909 | 0.109469 | -4.10239 | 4.09E-05 | 0.000177 | 2472.998 | 2859.132 | 2400.273 | 1801.326 | 1905.948 | 1952.675   |
| 21188 | LOC119627 | 24.86148 | -0.44909 | 0.526948 | -0.85225 | 0.394074 | 0.494452 | 33.60935 | 23.53871 | 29.91645 | 17.85702 | 17.11289 | 27.13445   |
| 9096  | SART1     | 3074.215 | -0.44935 | 0.145667 | -3.08475 | 0.002037 | 0.005954 | 3126.754 | 4442.247 | 3079.307 | 2689.713 | 2412.917 | 2694.35    |
| 8839  | RBM26     | 7214.787 | -0.44936 | 0.142225 | -3.15949 | 0.00158  | 0.004754 | 7339.307 | 10464.87 | 7182.731 | 5801.298 | 6517.87  | 5982.643   |
| 21205 | SIX3      | 43.18154 | -0.44943 | 0.529164 | -0.84931 | 0.395706 | 0.496102 | 34.15144 | 65.14201 | 48.7012  | 24.5534  | 68.45154 | 18.08963   |
| 4122  | EIF3L     | 12807.21 | -0.44959 | 0.085213 | -5.2761  | 1.32E-07 | 8.51E-07 | 15173.54 | 14573.2  | 14619.4  | 10961.98 | 10162.91 | 11352.25   |
| 23318 | EOLA1     | 8.885229 | -0.44975 | 0.880238 | -0.51094 | 0.609394 | 0.694774 | 12.46799 | 8.758589 | 9.740239 | 11.16063 | 2.139111 | 9.044815   |
| 7902  | LOC103215 | 895.1992 | -0.44991 | 0.13085  | -3.43834 | 0.000585 | 0.001969 | 1084.715 | 974.9404 | 1048.467 | 698.6557 | 710.1847 | 854.2325   |
| 8721  | PTDSS2    | 1465.042 | -0.44991 | 0.140705 | -3.19755 | 0.001386 | 0.004225 | 1759.07  | 1492.792 | 1831.861 | 1131.688 | 1116.616 | 1458.225   |
| 19956 | PRX       | 53.20566 | -0.45004 | 0.434035 | -1.03687 | 0.299798 | 0.399385 | 53.12446 | 46.53    | 82.79203 | 64.73168 | 44.92132 | 27.13445   |
| 18809 | LOC119615 | 57.39725 | -0.45014 | 0.370166 | -1.21606 | 0.223961 | 0.316551 | 70.47123 | 71.71095 | 55.65851 | 66.96381 | 36.36488 | 43.21412   |
| 7909  | LOC119620 | 1056.051 | -0.45019 | 0.131053 | -3.43519 | 0.000592 | 0.00199  | 1215.9   | 1336.232 | 1109.692 | 785.7087 | 939.0696 | 949.7056   |
| 7702  | CUNH9orf1 | 605.4911 | -0.4503  | 0.128921 | -3.49281 | 0.000478 | 0.00165  | 730.7324 | 693.5708 | 672.7722 | 499.9964 | 528.3603 | 507.5146   |
| 10935 | VAMP4     | 330.2969 | -0.45042 | 0.170413 | -2.6431  | 0.008215 | 0.019972 | 357.2349 | 420.4123 | 363.8675 | 281.248  | 303.7537 | 255.2648   |
| 23796 | LOC119624 | 6.762582 | -0.45045 | 1.030722 | -0.43703 | 0.662091 | 0.739748 | 9.757555 | 3.284471 | 10.43597 | 8.928508 | 2.139111 | 6.029877   |
| 5980  | IFT88     | 2047.973 | -0.45047 | 0.107972 | -4.17207 | 3.02E-05 | 0.000134 | 2366.207 | 2582.142 | 2145.636 | 1752.22  | 1724.123 | 1717.51    |
| 12813 | BORCS5    | 236.7988 | -0.45084 | 0.201619 | -2.23612 | 0.025344 | 0.052584 | 253.6964 | 259.4732 | 308.209  | 227.677  | 164.7115 | 207.0258   |
| 4883  | MTOR      | 8482.431 | -0.45091 | 0.094908 | -4.75105 | 2.02E-06 | 1.10E-05 | 9910.423 | 10064.71 | 9425.769 | 7020.039 | 6656.912 | 7816.73    |
| 16852 | PCSK1N    | 94.53338 | -0.45096 | 0.297625 | -1.5152  | 0.129721 | 0.204642 | 91.07051 | 120.4306 | 116.1871 | 98.21359 | 59.8951  | 81.40334   |
| 24075 | LOC103235 | 4.935634 | -0.45115 | 1.146456 | -0.39351 | 0.69394  | 0.766225 | 4.336691 | 8.211177 | 4.174388 | 4.464254 | 6.417332 | 2.009959   |
| 18321 | RADIL     | 65.90621 | -0.45133 | 0.35278  | -1.27936 | 0.200769 | 0.291339 | 84.56547 | 56.93083 | 88.35788 | 44.64254 | 55.61688 | 65.32367   |
| 18181 | LOC119628 | 78.33898 | -0.45145 | 0.345841 | -1.30538 | 0.191763 | 0.280404 | 97.57555 | 72.25836 | 99.48959 | 62.49956 | 91.98176 | 46.22906   |
| 18286 | LOC103224 | 60.42423 | -0.45149 | 0.350923 | -1.28657 | 0.198246 | 0.288219 | 61.25576 | 79.92212 | 66.79021 | 51.33892 | 62.03421 | 41.20416   |
| 20137 | SAMD11    | 34.70323 | -0.45157 | 0.448934 | -1.00586 | 0.314481 | 0.41518  | 37.40396 | 39.41365 | 42.43961 | 40.17829 | 25.66933 | 23.11453   |
| 22605 | MMP28     | 12.82921 | -0.45165 | 0.724183 | -0.62366 | 0.532848 | 0.626666 | 17.34676 | 15.32753 | 11.1317  | 11.16063 | 14.97377 | 7.034856   |
| 8542  | LOC103230 | 602.7557 | -0.4517  | 0.139299 | -3.24265 | 0.001184 | 0.003686 | 726.9378 | 728.6051 | 633.1155 | 546.8711 | 468.4652 | 512.5395   |
| 6056  | DVL2      | 3255.596 | -0.45171 | 0.109055 | -4.14205 | 3.44E-05 | 0.000151 | 3948.557 | 3507.267 | 3835.567 | 2727.659 | 2483.507 | 3031.018   |
| 19379 | LOC119625 | 45.40684 | -0.45197 | 0.402699 | -1.12235 | 0.261713 | 0.35903  | 58.54533 | 43.24553 | 54.26705 | 40.17829 | 47.06043 | 29.1444    |
| 4934  | LOC103227 | 4413.888 | -0.45214 | 0.095704 | -4.72431 | 2.31E-06 | 1.24E-05 | 5184.514 | 5318.653 | 4802.634 | 3676.313 | 3529.533 | 3971.679   |
| 16146 | LOC103247 | 109.3463 | -0.45224 | 0.276109 | -1.6379  | 0.101443 | 0.16703  | 146.9054 | 124.2625 | 106.4469 | 84.82083 | 111.2338 | 82.40832   |
| 9569  | SMG7      | 2637.257 | -0.45243 | 0.152466 | -2.96741 | 0.003003 | 0.008344 | 2610.146 | 3886.076 | 2647.954 | 2145.074 | 2177.615 | 2356.677   |
| 13661 | LOC119627 | 166.3312 | -0.45266 | 0.218048 | -2.07595 | 0.037898 | 0.073752 | 207.6191 | 168.0554 | 200.3706 | 145.0883 | 141.1813 | 135.6722   |
| 6342  | SMYD5     | 3240.407 | -0.4527  | 0.112923 | -4.00895 | 6.10E-05 | 0.000256 | 4006.56  | 3458.548 | 3777.821 | 2604.892 | 2528.429 | 3066.192   |
| 12262 | CUNH19orf | 210.7438 | -0.45275 | 0.192376 | -2.35347 | 0.018599 | 0.040324 | 245.5651 | 250.1672 | 236.5487 | 180.8023 | 160.4333 | 190.9461   |
| 16939 | LOC119620 | 79.37062 | -0.45276 | 0.301581 | -1.50129 | 0.133281 | 0.209179 | 81.85504 | 100.7238 | 93.92374 | 58.0353  | 66.31243 | 75.37346   |
| 12506 | KYAT1     | 308.0886 | -0.45279 | 0.196828 | -2.30041 | 0.021425 | 0.045545 | 403.3123 | 284.1067 | 383.348  | 241.0697 | 250.2759 | 286.4191   |
| 11902 | HNRNPD    | 2018.247 | -0.45279 | 0.186774 | -2.42426 | 0.01534  | 0.034263 | 1847.43  | 3214.95  | 1936.22  | 1522.311 | 1777.601 | 1810.973   |
| 22782 | LOC119625 | 11.79953 | -0.453   | 0.760797 | -0.59543 | 0.551559 | 0.643631 | 18.43094 | 8.211177 | 14.61036 | 8.928508 | 8.556443 | 12.05975   |
| 13898 | GATA5     | 197.398  | -0.4532  | 0.223266 | -2.02987 | 0.042369 | 0.081047 | 233.0971 | 191.5941 | 262.9865 | 154.0168 | 149.7377 | 192.9561   |
| 8058  | LOC103235 | 675.5149 | -0.45351 | 0.13351  | -3.39684 | 0.000682 | 0.002249 | 787.6515 | 827.1393 | 731.9094 | 529.0141 | 558.3079 | 619.0674   |
| 11492 | ZSWIM5    | 302.4582 | -0.45357 | 0.180166 | -2.51751 | 0.011819 | 0.027341 | 335.5515 | 398.5158 | 316.5578 | 254.4625 | 235.3022 | 274.3594   |
| 9829  | NDUFA7    | 2730.14  | -0.45365 | 0.156467 | -2.8993  | 0.00374  | 0.010116 | 3657.999 | 2336.354 | 3476.57  | 2223.198 | 2205.423 | 2481.294   |
| 18115 | LOC119627 | 59.25775 | -0.45426 | 0.344606 | -1.3182  | 0.187436 | 0.275075 | 62.88202 | 76.63765 | 66.09448 | 58.0353  | 40.6431  | 51.25395   |
| 17526 | ASIC3     | 73.84642 | -0.45432 | 0.321802 | -1.4118  | 0.158009 | 0.239678 | 79.14461 | 83.75401 | 91.83654 | 55.80317 | 81.28621 | 51.25395   |
| 5295  | ACVR2B    | 2601.094 | -0.45439 | 0.100535 | -4.51967 | 6.19E-06 | 3.11E-05 | 2950.034 | 3140.502 | 2938.074 | 2178.556 | 2040.712 | 2358.687   |
| 9474  | PYURF     | 1875.661 | -0.45452 | 0.151922 | -2.99182 | 0.002773 | 0.007781 | 2456.735 | 1642.783 | 2407.231 | 1624.988 | 1527.325 | 1594.902   |
| 8312  | UBE2K     | 2919.518 | -0.45453 | 0.137308 | -3.3103  | 0.000932 | 0.002981 | 2844.869 | 4084.787 | 3200.364 | 2368.287 | 2395.804 | 2622.996   |
| 5548  | NUDT5     | 2048.324 | -0.4546  | 0.103488 | -4.39283 | 1.12E-05 | 5.36E-05 | 2518.533 | 2180.889 | 2406.535 | 1761.148 | 1679.202 | 1743.639   |
| 9472  | PIGY      | 1875.751 | -0.45464 | 0.151944 | -2.99218 | 0.00277  | 0.007774 | 2457.278 | 1642.783 | 2407.231 | 1624.988 | 1527.325 | 1594.902   |
| 9163  | ZBED9     | 407.9993 | -0.45465 | 0.148437 | -3.06288 | 0.002192 | 0.00636  | 491.6723 | 472.4164 | 449.4425 | 363.8367 | 337.9795 | 332.6482   |
| 16123 | LOC119627 | 99.78179 | -0.45473 | 0.277036 | -1.64139 | 0.100716 | 0.166059 | 123.5957 | 108.935  | 112.0128 | 104.91   | 74.86887 | 74.36848   |
| 5469  | WASHC3    | 1555.062 | -0.45479 | 0.102687 | -4.42891 | 9.47E-06 | 4.60E-05 | 1827.373 | 1803.175 | 1769.245 | 1295.527 | 1294.162 | 1390.892   |
| 5928  | POLR2D    | 2481.08  | -0.45486 | 0.10837  | -4.19733 | 2.70E-05 | 0.000121 | 3056.825 | 2579.404 | 2975.643 | 2013.379 | 2049.268 | 2211.96    |
| 20242 | LOC103235 | 32.64058 | -0.45493 | 0.460032 | -0.9889  | 0.322712 | 0.423836 | 30.35684 | 45.43518 | 36.87376 | 31.24978 | 27.80844 | 24.11951   |
| 5825  | HDAC3     | 2197.653 | -0.45504 | 0.106794 | -4.26087 | 2.04E-05 | 9.29E-05 | 2651.887 | 2531.232 | 2448.279 | 1825.88  | 1700.593 | 2028.049</ |



|       |           |          |          |          |          |          |          |          |          |          |          |          |          |
|-------|-----------|----------|----------|----------|----------|----------|----------|----------|----------|----------|----------|----------|----------|
| 8370  | ELMOD3    | 757.1655 | -0.4553  | 0.13829  | -3.29239 | 0.000993 | 0.003155 | 985.513  | 771.8507 | 871.0557 | 631.6919 | 624.6203 | 658.2616 |
| 10823 | NDUFC1    | 1370.941 | -0.45563 | 0.170937 | -2.66548 | 0.007688 | 0.018882 | 1772.08  | 1134.237 | 1851.341 | 1196.42  | 1103.781 | 1167.786 |
| 5379  | GOLPH3L   | 1872.866 | -0.4557  | 0.101804 | -4.47625 | 7.60E-06 | 3.75E-05 | 2099.501 | 2315.552 | 2081.628 | 1631.685 | 1555.133 | 1553.698 |
| 4911  | NEPRO     | 2103.028 | -0.45571 | 0.096157 | -4.73925 | 2.15E-06 | 1.16E-05 | 2465.951 | 2515.905 | 2317.481 | 1747.755 | 1754.071 | 1817.003 |
| 15086 | LOC10322C | 355.5673 | -0.45587 | 0.25067  | -1.8186  | 0.068972 | 0.121545 | 452.1    | 255.6413 | 523.8857 | 334.819  | 318.7275 | 248.2299 |
| 7729  | NAXD      | 2691.814 | -0.45591 | 0.130882 | -3.48337 | 0.000495 | 0.001703 | 3486.7   | 2633.598 | 3226.802 | 2205.341 | 2074.937 | 2523.503 |
| 7209  | LARP1     | 15711.13 | -0.45614 | 0.124515 | -3.66336 | 0.000249 | 0.000918 | 16301.62 | 21653.42 | 16573.02 | 12506.61 | 12819.69 | 14412.41 |
| 9391  | GLCCI1    | 452.341  | -0.45627 | 0.151608 | -3.00952 | 0.002617 | 0.007407 | 529.6184 | 532.0843 | 512.754  | 332.5869 | 382.9008 | 424.1013 |
| 5029  | THAP4     | 1996.241 | -0.45638 | 0.097655 | -4.67334 | 2.96E-06 | 1.57E-05 | 2300.615 | 2402.59  | 2227.732 | 1689.72  | 1617.168 | 1739.619 |
| 7012  | PRPF19    | 3001.362 | -0.45641 | 0.122391 | -3.72908 | 0.000192 | 0.000729 | 3262.818 | 3782.616 | 3380.559 | 2399.537 | 2263.179 | 2919.465 |
| 9573  | PPP1R35   | 1271.398 | -0.45645 | 0.153834 | -2.96713 | 0.003006 | 0.008348 | 1603.491 | 1145.186 | 1664.885 | 1136.153 | 988.2691 | 1090.403 |
| 6736  | SNRPD1    | 3433.264 | -0.45649 | 0.118812 | -3.84209 | 0.000122 | 0.000481 | 3616.8   | 4631.104 | 3665.113 | 2937.479 | 2956.251 | 2792.838 |
| 9318  | LOC11962C | 804.2915 | -0.4566  | 0.150846 | -3.02696 | 0.00247  | 0.007048 | 1006.112 | 821.1177 | 970.5453 | 667.406  | 579.699  | 780.869  |
| 22813 | LOC11962C | 11.57435 | -0.45671 | 0.773882 | -0.59015 | 0.555087 | 0.646904 | 14.09425 | 13.6853  | 11.82743 | 6.696381 | 17.11289 | 6.029877 |
| 6431  | MAP2K2    | 5383.553 | -0.4568  | 0.115126 | -3.9678  | 7.25E-05 | 0.0003   | 6671.457 | 5557.325 | 6464.736 | 4571.396 | 4038.641 | 4997.763 |
| 5611  | FBXL20    | 1322.755 | -0.45681 | 0.104588 | -4.36767 | 1.26E-05 | 5.95E-05 | 1523.805 | 1582.02  | 1481.908 | 1140.617 | 1135.868 | 1072.313 |
| 13277 | LOC10323A | 503.4214 | -0.45683 | 0.21225  | -2.15233 | 0.031372 | 0.062818 | 718.2644 | 409.464  | 623.3753 | 377.2295 | 395.7355 | 496.4599 |
| 7807  | RAB12     | 2036.032 | -0.45703 | 0.131953 | -3.46357 | 0.000533 | 0.001815 | 2081.07  | 2812.602 | 2173.465 | 1667.399 | 1771.184 | 1710.475 |
| 21568 | LOC11962C | 23.56152 | -0.45721 | 0.575597 | -0.79432 | 0.427012 | 0.526349 | 17.34676 | 41.05589 | 23.65487 | 20.08914 | 17.11289 | 22.10955 |
| 17288 | LOC11962A | 71.08752 | -0.45775 | 0.31548  | -1.45096 | 0.146791 | 0.225731 | 83.4813  | 85.94365 | 76.53045 | 53.57105 | 72.72976 | 54.26889 |
| 23829 | LOC10321B | 6.799598 | -0.45775 | 1.05606  | -0.43345 | 0.664687 | 0.741563 | 7.047123 | 8.211177 | 8.348776 | 11.16063 | 0        | 6.029877 |
| 6765  | RPAP2     | 786.0596 | -0.45785 | 0.119522 | -3.83066 | 0.000128 | 0.000502 | 889.5637 | 924.0311 | 913.4953 | 705.3521 | 641.7332 | 642.1819 |
| 9047  | CHORDC1   | 4266.077 | -0.45813 | 0.147917 | -3.09723 | 0.001953 | 0.005739 | 4240.742 | 6301.257 | 4269.703 | 3689.706 | 3593.706 | 3501.348 |
| 5309  | DNAJC19   | 1856.607 | -0.45815 | 0.10151  | -4.51334 | 6.38E-06 | 3.20E-05 | 2152.083 | 2042.393 | 2249.995 | 1647.31  | 1527.325 | 1520.534 |
| 10336 | ZNF180    | 355.457  | -0.45823 | 0.164789 | -2.78072 | 0.005424 | 0.013951 | 403.8543 | 449.4251 | 384.0437 | 279.0159 | 288.7799 | 327.6233 |
| 11729 | SIMC1     | 800.7665 | -0.4583  | 0.185976 | -2.46428 | 0.013729 | 0.031118 | 825.0555 | 1173.104 | 787.5679 | 564.7281 | 648.1505 | 805.9935 |
| 5458  | LOC10322B | 3152.133 | -0.45905 | 0.103463 | -4.43682 | 9.13E-06 | 4.45E-05 | 3798.941 | 3346.328 | 3807.738 | 2696.409 | 2468.534 | 2794.848 |
| 16051 | LOC10322B | 103.4757 | -0.45913 | 0.277192 | -1.65637 | 0.097647 | 0.16173  | 106.2489 | 140.1374 | 111.317  | 91.51721 | 96.25998 | 75.37346 |
| 12059 | CASTOR1   | 256.7422 | -0.45921 | 0.191728 | -2.39513 | 0.016614 | 0.036628 | 318.2047 | 257.831  | 316.5578 | 234.3733 | 190.3808 | 223.1054 |
| 17981 | LOC10322B | 392901   | -0.45923 | 0.341052 | -1.34652 | 0.178134 | 0.263373 | 523210.4 | 249841.5 | 591683.4 | 356923.8 | 341128.3 | 294618.8 |
| 19165 | LOC10323B | 48.66557 | -0.4594  | 0.396578 | -1.15842 | 0.246693 | 0.342204 | 47.16151 | 64.04718 | 58.44144 | 26.78552 | 51.33866 | 44.2191  |
| 23966 | LOC10322C | 5.02043  | -0.4595  | 1.114739 | -0.4122  | 0.68019  | 0.754521 | 5.420864 | 4.379295 | 7.653045 | 2.232127 | 6.417332 | 4.019918 |
| 5468  | TRMT5     | 1246.294 | -0.45951 | 0.103732 | -4.42979 | 9.43E-06 | 4.59E-05 | 1430.024 | 1461.59  | 1438.772 | 1011.154 | 1075.973 | 1060.253 |
| 6166  | POLD3     | 2062.326 | -0.45954 | 0.112321 | -4.09133 | 4.58E-05 | 0.000185 | 2277.305 | 2666.99  | 2222.862 | 1707.577 | 1679.202 | 1820.018 |
| 4505  | THOC5     | 3307.491 | -0.45958 | 0.091758 | -5.00864 | 5.48E-07 | 3.23E-06 | 3889.47  | 3899.214 | 3706.857 | 2694.177 | 2716.671 | 2938.56  |
| 9869  | FBXO5     | 1679.352 | -0.45959 | 0.159072 | -2.88921 | 0.003862 | 0.010404 | 1671.794 | 2494.556 | 1666.277 | 1377.222 | 1482.404 | 1383.857 |
| 17303 | LOC11962C | 67.80296 | -0.45959 | 0.317381 | -1.44808 | 0.147595 | 0.226771 | 83.4813  | 79.92212 | 73.05179 | 53.57105 | 53.47777 | 63.31371 |
| 9041  | ODF3L2    | 428.8871 | -0.45963 | 0.1482   | -3.10141 | 0.001926 | 0.005663 | 498.7195 | 465.8475 | 523.19   | 370.5331 | 374.3444 | 340.688  |
| 4951  | UNK       | 2144.782 | -0.45974 | 0.097536 | -4.71358 | 2.43E-06 | 1.31E-05 | 2368.175 | 2594.185 | 2492.11  | 1754.452 | 1788.297 | 1871.272 |
| 24119 | LOC11962C | 5.038723 | -0.45981 | 1.186301 | -0.3876  | 0.698313 | 0.76971  | 7.589209 | 6.02153  | 4.174388 | 0        | 6.417332 | 6.029877 |
| 4538  | AVL9      | 3657.895 | -0.46003 | 0.092205 | -4.98916 | 6.06E-07 | 3.55E-06 | 4441.856 | 4257.769 | 4011.587 | 2966.497 | 3105.989 | 3163.675 |
| 7185  | LOC10322A | 936.6076 | -0.46026 | 0.125384 | -3.67082 | 0.000242 | 0.000895 | 1109.109 | 1107.962 | 1032.465 | 758.9232 | 885.5918 | 725.5952 |
| 19147 | LOC10323B | 43.52385 | -0.46044 | 0.39648  | -1.16133 | 0.245507 | 0.340878 | 54.20864 | 44.88777 | 51.48412 | 33.4819  | 44.92132 | 32.15934 |
| 23843 | ACBD7     | 5.517358 | -0.46053 | 1.068089 | -0.43117 | 0.666343 | 0.742974 | 5.420864 | 5.474118 | 8.348776 | 6.696381 | 2.139111 | 5.024897 |
| 5358  | RBL2      | 3088.497 | -0.46097 | 0.102782 | -4.48495 | 7.29E-06 | 3.62E-05 | 3436.285 | 3917.279 | 3383.342 | 2584.803 | 2487.786 | 2721.484 |
| 15199 | APOM      | 113.1374 | -0.46114 | 0.256721 | -1.79625 | 0.072454 | 0.126715 | 131.1849 | 135.2107 | 124.5359 | 102.6778 | 104.8164 | 80.39836 |
| 15973 | ZCCHC18   | 108.689  | -0.46122 | 0.276093 | -1.67054 | 0.094813 | 0.157804 | 115.4644 | 133.5685 | 125.9274 | 113.8385 | 91.98176 | 71.35354 |
| 8967  | LOC11961B | 743.3099 | -0.46128 | 0.147522 | -3.12687 | 0.001767 | 0.005238 | 971.4188 | 728.0577 | 882.1874 | 613.8349 | 667.4025 | 596.9578 |
| 15519 | LOC10322B | 429.757  | -0.46153 | 0.265294 | -1.7397  | 0.081911 | 0.140318 | 343.6828 | 609.2693 | 535.7132 | 475.443  | 389.3181 | 225.1154 |
| 15481 | LOC10323B | 124.8864 | -0.46162 | 0.264078 | -1.74804 | 0.080456 | 0.138165 | 129.0166 | 180.6459 | 124.5359 | 104.91   | 102.6773 | 107.5328 |
| 11431 | CNOT3     | 1128.697 | -0.46191 | 0.182591 | -2.52973 | 0.011415 | 0.026548 | 1037.553 | 1758.287 | 1127.781 | 926.3327 | 960.4607 | 961.7654 |
| 6699  | MCUR1     | 3686.132 | -0.46193 | 0.1198   | -3.85585 | 0.000115 | 0.000458 | 3976.204 | 5011.008 | 3827.218 | 3060.246 | 3082.458 | 3159.655 |
| 11371 | LRRIQ3    | 257.3126 | -0.46223 | 0.181731 | -2.5435  | 0.010975 | 0.025659 | 287.8479 | 276.9904 | 330.4724 | 220.9806 | 207.4937 | 220.0905 |
| 18366 | LOC10321B | 57.50001 | -0.46236 | 0.363945 | -1.27042 | 0.203934 | 0.295197 | 71.01331 | 78.8273  | 49.39693 | 51.33892 | 49.19955 | 45.22408 |
| 5264  | PARL      | 1960.012 | -0.46237 | 0.101725 | -4.54531 | 5.49E-06 | 2.77E-05 | 2229.631 | 2356.06  | 2227.732 | 1763.38  | 1540.16  | 1643.141 |
| 11561 | CABCOCO1  | 411.4006 | -0.46239 | 0.184763 | -2.5026  | 0.012329 | 0.028835 | 427.1641 | 568.7609 | 429.962  | 368.301  | 380.7617 | 293.454  |
| 19159 | LOC10322B | 51.60183 | -0.46243 | 0.399051 | -1.15881 | 0.246533 | 0.342079 | 76.43418 | 42.69812 | 59.13717 | 49.10679 | 47.06043 | 35.17428 |
| 5238  | USP37     | 3098.93  | -0.46257 | 0.101442 | -4.55995 | 5.12E-06 | 2.60E-05 | 3485.615 | 3933.701 | 3354.121 | 2683.017 | 2541.263 | 2595.862 |
| 23258 | LOC11962C | 8.81612  | -0.46279 | 0.887697 | -0.52134 | 0.602133 | 0.688291 | 8.131296 | 6.568942 | 16.00182 | 4.464254 | 10.69555 | 7.034856 |
| 16539 | LOC10324B | 80.13734 | -0.46279 | 0.295099 | -1.56827 | 0.116819 | 0.187765 | 93.78094 | 98.53413 | 86.96642 | 71.42806 | 57.75599 | 72.35852 |
| 12032 | NMNAT3    | 267.7812 | -0.46285 | 0.192779 | -2.40092 | 0.016354 | 0.036135 | 283.5112 | 292.8653 | 357.6059 | 227.677  | 196.7982 | 248.2299 |
| 21662 | LOC11962B | 20.82987 | -0.46286 | 0.591755 | -0.78218 | 0.434111 | 0.532769 | 27.10432 | 19.15941 | 25.04633 | 20.08914 | 23.53022 | 10.04979 |
| 11276 | LOC10323C | 263.6863 | -0.46333 | 0.18076  | -2.56321 | 0.010371 | 0.024451 | 305.7367 | 331.7316 | 280.3797 | 229.9091 | 203.2155 | 231.1453 |
| 22549 | TRNAK-CU  | 15.17397 | -0.46361 | 0.73362  | -0.63195 | 0.527422 | 0.621808 | 21.14137 | 6.568942 | 25.04633 | 13.39276 | 12.83466 | 12.05975 |
| 4009  | CCT7      | 13053.53 | -0.46367 | 0.086411 | -5.3658  | 8.06E-08 | 5.34E-07 | 14929.06 | 15737.54 | 14740.46 | 10821.35 | 10458.11 | 11634.65 |
| 19415 | TRNAS-GCI | 64.60443 | -0.46373 | 0.415612 | -1.11579 | 0.264514 | 0.362199 | 85.10756 | 39.96106 | 100.881  | 53.57105 | 42.78221 | 65.32367 |
| 20168 | LOC11962C | 34.63689 | -0.4638  | 0.463289 | -1.0011  | 0.316779 | 0.417572 | 32.52518 | 45.98259 | 41.74388 | 40.17829 | 19.252   | 28.13943 |
| 5038  | AIMP2     | 2842.847 | -0.46386 | 0.099382 | -4.66748 | 3.05E-06 | 1.61E-05 | 3547.955 | 3080.834 | 3261.589 | 2305.787 | 2410.778 | 2450.14  |
| 5618  | THUMP3D   | 3045.831 | -0.46401 | 0.106327 | -4.36403 | 1.28E-05 | 6.04E-05 | 3401.05  | 3889.908 | 3297.767 | 2636.142 | 2648.219 | 2401.901 |
| 4561  | FASTKD2   | 3688.902 | -0.46405 | 0.093455 | -4.96549 | 6.85E-07 | 3.99E-06 | 4428.846 | 3973.662 | 4431.113 | 3098.192 | 3043.954 | 3157.645 |



|       |           |          |          |          |          |          |           |          |          |          |          |          |          |
|-------|-----------|----------|----------|----------|----------|----------|-----------|----------|----------|----------|----------|----------|----------|
| 7000  | PRPSAP2   | 1185.306 | -0.46475 | 0.124527 | -3.73215 | 0.00019  | 0.000721  | 1523.263 | 1214.159 | 1387.288 | 962.0467 | 1016.078 | 1008.999 |
| 5916  | SPG7      | 5485.67  | -0.46477 | 0.110577 | -4.2031  | 2.63E-05 | 0.000118  | 6804.268 | 5815.156 | 6473.78  | 4578.092 | 4143.457 | 5099.266 |
| 18164 | LOC103246 | 68.51095 | -0.46494 | 0.354972 | -1.3098  | 0.190262 | 0.27847   | 62.88202 | 100.7238 | 73.05179 | 71.42806 | 57.75599 | 45.22408 |
| 8336  | PYGO1     | 1523.377 | -0.46507 | 0.140843 | -3.30205 | 0.00096  | 0.003061  | 1593.734 | 2120.126 | 1588.355 | 1169.635 | 1334.805 | 1333.608 |
| 5438  | TEX10     | 2887.833 | -0.46515 | 0.104658 | -4.44449 | 8.81E-06 | 4.31E-05  | 3399.966 | 3455.263 | 3200.364 | 2410.697 | 2207.562 | 2653.146 |
| 7105  | ZNF143    | 1076.033 | -0.46524 | 0.125928 | -3.69451 | 0.00022  | 0.000824  | 1196.385 | 1402.469 | 1145.174 | 939.7255 | 859.9225 | 912.5214 |
| 21426 | LOC103238 | 21.6818  | -0.46528 | 0.571308 | -0.8144  | 0.415414 | 0.0515438 | 29.81475 | 20.25424 | 26.43779 | 15.62489 | 12.83466 | 25.12449 |
| 22833 | LOC103214 | 11.63795 | -0.46537 | 0.790984 | -0.58834 | 0.556302 | 0.64781   | 16.80468 | 10.94824 | 11.82743 | 13.39276 | 12.83466 | 4.019918 |
| 15231 | LOC119618 | 116.7066 | -0.4654  | 0.260038 | -1.78974 | 0.073496 | 0.128285  | 120.3432 | 159.8442 | 126.6231 | 91.51721 | 98.39909 | 103.5129 |
| 4716  | SIKE1     | 3376.301 | -0.4654  | 0.095542 | -4.87119 | 1.11E-06 | 6.25E-06  | 4074.321 | 3739.37  | 3940.622 | 2837.033 | 2669.61  | 2996.849 |
| 8357  | MORC2     | 2335.679 | -0.46552 | 0.141285 | -3.29492 | 0.000984 | 0.003132  | 2446.436 | 3337.022 | 2346.006 | 1906.236 | 1925.2   | 2053.173 |
| 18398 | KLC3      | 78.68252 | -0.46552 | 0.368047 | -1.26485 | 0.205926 | 0.297562  | 91.6126  | 89.77554 | 89.05362 | 93.74933 | 72.72976 | 35.17428 |
| 18989 | LOC103226 | 58.12759 | -0.46562 | 0.392358 | -1.18672 | 0.235338 | 0.329458  | 89.98634 | 45.98259 | 65.39875 | 60.26743 | 44.92132 | 42.20914 |
| 10039 | LSM3      | 1868.443 | -0.46578 | 0.163238 | -2.85339 | 0.004326 | 0.011456  | 1776.417 | 2816.981 | 1907     | 1616.06  | 1595.777 | 1498.424 |
| 15409 | LOC119624 | 128.2774 | -0.46581 | 0.264869 | -1.75863 | 0.07864  | 0.135677  | 172.3835 | 129.7366 | 145.4079 | 80.35657 | 126.2075 | 115.5726 |
| 8380  | ZBTB25    | 609.7932 | -0.46583 | 0.141621 | -3.28925 | 0.001005 | 0.003187  | 737.7795 | 707.8035 | 682.5125 | 486.6037 | 464.187  | 579.8732 |
| 5554  | GRK6      | 2202.002 | -0.46584 | 0.106107 | -4.39027 | 1.13E-05 | 5.42E-05  | 2692.543 | 2428.866 | 2547.768 | 1863.826 | 1694.176 | 1984.834 |
| 5383  | SNRNP27   | 1707.673 | -0.46619 | 0.104208 | -4.47364 | 7.69E-06 | 3.80E-05  | 1915.191 | 2110.82  | 1916.74  | 1379.454 | 1503.795 | 1420.036 |
| 6983  | ZNF568    | 957.0692 | -0.46645 | 0.124692 | -3.74082 | 0.000183 | 0.000698  | 1071.163 | 1224.56  | 1035.248 | 763.3874 | 847.0878 | 800.9686 |
| 4917  | SHISA5    | 6316.147 | -0.46664 | 0.098571 | -4.73409 | 2.20E-06 | 1.19E-05  | 7311.661 | 7606.835 | 7077.675 | 5089.25  | 4958.459 | 5853     |
| 4594  | SEC22C    | 3064.187 | -0.46689 | 0.094404 | -4.94565 | 7.59E-07 | 4.39E-06  | 3747.443 | 3514.931 | 3409.084 | 2529     | 2496.342 | 2688.32  |
| 6083  | TSTD2     | 1175.37  | -0.46713 | 0.113116 | -4.12967 | 3.63E-05 | 0.000159  | 1321.064 | 1438.051 | 1337.891 | 962.0467 | 936.9305 | 1056.233 |
| 18874 | LOC103225 | 57.13571 | -0.46721 | 0.386893 | -1.20759 | 0.227205 | 0.32003   | 76.43418 | 50.36189 | 72.35606 | 31.24978 | 64.17332 | 48.23901 |
| 4352  | NUP205    | 8880.75  | -0.46723 | 0.091388 | -5.11261 | 3.18E-07 | 1.94E-06  | 10521.35 | 10546.98 | 9859.209 | 7075.843 | 7247.307 | 8033.806 |
| 21525 | FAM166A   | 24.49924 | -0.4674  | 0.583766 | -0.80066 | 0.423329 | 0.522843  | 19.51511 | 45.98259 | 20.17621 | 20.08914 | 17.11289 | 24.11951 |
| 4539  | SMPD4     | 2849.683 | -0.46744 | 0.093752 | -4.98597 | 6.17E-07 | 3.61E-06  | 3231.919 | 3491.393 | 3200.364 | 2424.09  | 2310.24  | 2440.09  |
| 14510 | LOC119628 | 132.7088 | -0.46749 | 0.243279 | -1.92163 | 0.054652 | 0.100133  | 156.1209 | 136.3055 | 170.4542 | 120.5349 | 96.25998 | 116.5776 |
| 20432 | LOC119627 | 45.49279 | -0.46753 | 0.488509 | -0.95705 | 0.338544 | 0.440495  | 61.79785 | 28.46541 | 69.57314 | 20.08914 | 42.78221 | 50.24897 |
| 11175 | LOC103225 | 261.5187 | -0.46759 | 0.180814 | -2.58605 | 0.009708 | 0.023094  | 307.363  | 307.6454 | 297.773  | 229.9091 | 188.2417 | 238.1801 |
| 6082  | DZIP3     | 2716.073 | -0.46759 | 0.113217 | -4.13008 | 3.63E-05 | 0.000159  | 2960.876 | 3598.685 | 2897.025 | 2279.002 | 2284.57  | 2276.278 |
| 11919 | TIMM10    | 894.0223 | -0.46761 | 0.19322  | -2.42008 | 0.015517 | 0.03461   | 1221.863 | 704.519  | 1189.005 | 727.6734 | 708.0456 | 813.0284 |
| 6856  | ZNF487    | 712.4968 | -0.46799 | 0.12337  | -3.79337 | 0.000149 | 0.000576  | 864.0857 | 806.3376 | 811.9185 | 611.6028 | 569.0034 | 612.0325 |
| 7861  | COQ5      | 1737.278 | -0.4682  | 0.135665 | -3.45117 | 0.000558 | 0.001888  | 2240.443 | 1663.585 | 2150.506 | 1368.294 | 1431.065 | 1569.778 |
| 13895 | MYO1A     | 146.3382 | -0.46823 | 0.230597 | -2.03049 | 0.042306 | 0.080942  | 171.2993 | 158.7494 | 177.4115 | 124.9991 | 139.0422 | 106.5278 |
| 11185 | PRIM2     | 525.3926 | -0.46823 | 0.181143 | -2.58489 | 0.009741 | 0.023153  | 662.4295 | 506.9033 | 665.1192 | 348.2118 | 464.187  | 505.5047 |
| 5632  | AGK       | 3177.07  | -0.46857 | 0.107522 | -4.35788 | 1.31E-05 | 6.20E-05  | 3562.592 | 4125.295 | 3378.472 | 2703.106 | 2575.489 | 2717.464 |
| 8780  | OBI1      | 1966.507 | -0.4686  | 0.147389 | -3.17935 | 0.001476 | 0.004469  | 1993.252 | 2858.584 | 1997.445 | 1645.078 | 1636.42  | 1668.266 |
| 4737  | MKKS      | 2503.211 | -0.46881 | 0.096504 | -4.85793 | 1.19E-06 | 6.66E-06  | 3000.99  | 2840.52  | 2877.545 | 1979.897 | 2228.953 | 2091.362 |
| 20620 | LOC103246 | 34.07414 | -0.46882 | 0.502432 | -0.93309 | 0.350772 | 0.452245  | 53.66655 | 26.82318 | 36.87376 | 40.17829 | 27.80844 | 19.09461 |
| 20913 | LOC103237 | 35.14718 | -0.46888 | 0.527025 | -0.88968 | 0.373639 | 0.474955  | 22.76763 | 61.31012 | 39.65669 | 24.5534  | 21.39111 | 41.20416 |
| 21983 | LOC103234 | 15.58726 | -0.46905 | 0.641918 | -0.7307  | 0.464961 | 0.562302  | 19.51511 | 20.80165 | 13.91463 | 13.39276 | 12.83466 | 13.06473 |
| 23247 | TRNAH-GU  | 8.066934 | -0.46906 | 0.897434 | -0.52267 | 0.601204 | 0.68753   | 13.01007 | 7.116354 | 8.348776 | 4.464254 | 6.417332 | 9.044815 |
| 5111  | SLC30A9   | 8878.157 | -0.46927 | 0.101508 | -4.62298 | 3.78E-06 | 1.97E-05  | 9755.928 | 11608.96 | 9562.132 | 7453.072 | 7508.278 | 7380.569 |
| 5637  | B3GLCT    | 1449.429 | -0.46936 | 0.107749 | -4.35602 | 1.32E-05 | 6.25E-05  | 1774.249 | 1680.554 | 1598.095 | 1216.509 | 1150.842 | 1276.324 |
| 5584  | KXD1      | 2745.001 | -0.46974 | 0.107267 | -4.37922 | 1.19E-05 | 5.67E-05  | 3088.266 | 3501.246 | 2975.643 | 2401.769 | 2143.389 | 2359.692 |
| 8761  | RBM17     | 3151.72  | -0.46978 | 0.147478 | -3.18544 | 0.001445 | 0.004386  | 3163.616 | 4640.957 | 3176.709 | 2575.875 | 2673.888 | 2679.275 |
| 6921  | ZNF507    | 2148.227 | -0.46979 | 0.124768 | -3.76534 | 0.000166 | 0.000639  | 2249.658 | 2868.985 | 2371.053 | 1745.523 | 1698.454 | 1955.69  |
| 6753  | GOLGA1    | 1575.263 | -0.46992 | 0.122523 | -3.83535 | 0.000125 | 0.000494  | 1827.373 | 2041.846 | 1623.141 | 1272.312 | 1274.91  | 1411.996 |
| 11546 | UBXN11    | 244.3804 | -0.47    | 0.187652 | -2.50464 | 0.012257 | 0.028221  | 311.6997 | 251.262  | 288.7285 | 205.3557 | 203.2155 | 206.0208 |
| 6034  | ABHD17C   | 2078.953 | -0.47013 | 0.113323 | -4.14856 | 3.35E-05 | 0.000147  | 2426.921 | 2577.762 | 2245.821 | 1277.666 | 1585.081 | 1910.466 |
| 6086  | LOC119624 | 4845.723 | -0.47025 | 0.113915 | -4.12809 | 3.66E-05 | 0.00016   | 5241.433 | 6335.197 | 5316.083 | 3801.312 | 3908.155 | 4472.159 |
| 5262  | OTUD7B    | 3594.521 | -0.47035 | 0.103458 | -4.54631 | 5.46E-06 | 2.76E-05  | 4006.018 | 4556.109 | 3969.843 | 2919.622 | 2883.521 | 3232.014 |
| 13308 | ZRSR2     | 500.7343 | -0.47037 | 0.219251 | -2.14537 | 0.031923 | 0.063773  | 473.2414 | 806.885  | 464.0528 | 379.4616 | 472.7435 | 408.0217 |
| 6295  | KCTD2     | 1572.381 | -0.4704  | 0.116747 | -4.02922 | 5.60E-05 | 0.000236  | 1919.528 | 1764.856 | 1803.336 | 1252.223 | 1215.015 | 1479.33  |
| 7093  | DNTTIP1   | 1296.62  | -0.47068 | 0.127227 | -3.69956 | 0.000216 | 0.000809  | 1435.987 | 1715.041 | 1370.591 | 1087.046 | 1280.356 | 1150.701 |
| 6879  | SNRPF     | 2967.615 | -0.47095 | 0.124371 | -3.78668 | 0.000153 | 0.00059   | 3119.165 | 4052.49  | 3167.665 | 2535.696 | 2584.046 | 2346.627 |
| 8381  | YTHDC1    | 3051.529 | -0.47103 | 0.143208 | -3.28912 | 0.001005 | 0.003188  | 3188.552 | 4367.251 | 3084.177 | 2424.09  | 2432.169 | 2812.938 |
| 19927 | CROCC2    | 39.93489 | -0.47112 | 0.4518   | -1.04275 | 0.297062 | 0.396316  | 55.29281 | 30.65506 | 52.17985 | 35.71403 | 40.6431  | 25.12449 |
| 7027  | LOC103237 | 2239.323 | -0.47113 | 0.126526 | -3.72356 | 0.000196 | 0.000743  | 2861.132 | 2156.255 | 2787.1   | 1895.076 | 1895.252 | 1841.122 |
| 6503  | CUNH5orf  | 1298.12  | -0.47114 | 0.119581 | -3.9399  | 8.15E-05 | 0.000333  | 1411.051 | 1688.218 | 1422.771 | 1113.831 | 1101.642 | 1051.209 |
| 11308 | TMEM81    | 261.6849 | -0.47115 | 0.18429  | -2.55656 | 0.010571 | 0.024853  | 317.1205 | 300.5291 | 297.0773 | 183.0344 | 233.1631 | 239.1851 |
| 7081  | FER       | 4634.932 | -0.47138 | 0.127312 | -3.70259 | 0.000213 | 0.000801  | 4912.929 | 6425.52  | 4821.418 | 3642.831 | 3865.373 | 4141.52  |
| 6556  | LOC119628 | 897.5058 | -0.47148 | 0.120383 | -3.9165  | 8.98E-05 | 0.000364  | 1020.749 | 1113.436 | 996.9831 | 758.9232 | 708.0456 | 786.8989 |
| 5920  | LOC103247 | 2974.876 | -0.47156 | 0.112223 | -4.20196 | 2.65E-05 | 0.000119  | 3304.016 | 3908.52  | 3158.62  | 2562.482 | 2367.996 | 2547.623 |
| 6363  | SSR4      | 9450.015 | -0.47176 | 0.117996 | -3.99809 | 6.39E-05 | 0.000267  | 11688.47 | 9105.101 | 12150.95 | 8153.96  | 7728.607 | 7873.009 |
| 9377  | ZNF669    | 351.8629 | -0.47177 | 0.156585 | -3.01286 | 0.002588 | 0.007337  | 410.9015 | 391.9469 | 422.3089 | 290.1765 | 314.4493 | 281.3943 |
| 5300  | LOC103215 | 14261.59 | -0.47195 | 0.104471 | -4.51749 | 6.26E-06 | 3.14E-05  | 15533.48 | 18674.95 | 15517.59 | 11671.79 | 11467.77 | 12703.95 |
| 4425  | CDC42EP1  | 3922.191 | -0.4722  | 0.093331 | -5.0594  | 4.21E-07 | 2.53E-06  | 4413.125 | 4554.466 | 4712.189 | 3372.744 | 3054.65  | 3425.975 |
| 13299 | NPRL3     | 172.2659 | -0.47221 | 0.219885 | -2.14754 | 0.031751 | 0.06347   | 202.7403 | 205.8268 | 194.1091 | 113.8385 | 158.2942 | 158.7868 |
| 4603  | MIB1      | 8443.592 | -0.47228 | 0.095583 | -4.94107 | 7.77E-07 | 4.49E-06  | 9736.413 | 10504.29 | 9205.917 | 6957.54  | 6703.973 | 7553.426 |
| 4348  |           |          |          |          |          |          |           |          |          |          |          |          |          |



|       |           |          |          |          |          |          |          |          |          |          |          |          |          |
|-------|-----------|----------|----------|----------|----------|----------|----------|----------|----------|----------|----------|----------|----------|
| 7643  | STOML2    | 5494.752 | -0.47252 | 0.134572 | -3.51131 | 0.000446 | 0.001551 | 7003.214 | 5000.607 | 7156.989 | 4683.002 | 4485.715 | 4638.985 |
| 17870 | LOC103245 | 62.10963 | -0.47264 | 0.346057 | -1.36579 | 0.172004 | 0.255889 | 62.88202 | 73.35318 | 79.31338 | 66.96381 | 44.92132 | 45.22408 |
| 25344 | LOC119625 | 1.642122 | -0.47278 | 2.474143 | -0.19109 | 0.848457 | 0.890003 | 4.878777 | 0        | 0.695731 | 0        | 4.278221 | 0        |
| 5982  | SHMT1     | 2884.979 | -0.4728  | 0.113348 | -4.17124 | 3.03E-05 | 0.000135 | 3482.905 | 3312.389 | 3274.808 | 2352.662 | 2145.528 | 2741.584 |
| 4536  | UBXN2A    | 2345.241 | -0.47292 | 0.09474  | -4.99173 | 5.98E-07 | 3.51E-06 | 2841.075 | 2651.663 | 2689.697 | 1908.469 | 1944.452 | 2036.088 |
| 10713 | ATG7      | 496.7588 | -0.47321 | 0.175988 | -2.6889  | 0.007169 | 0.01779  | 630.4464 | 464.7526 | 641.4643 | 388.3901 | 387.179  | 468.3204 |
| 12295 | SH2D5     | 237.3498 | -0.47335 | 0.201841 | -2.34516 | 0.019019 | 0.041124 | 299.7738 | 228.2707 | 301.2517 | 198.6593 | 186.1026 | 210.0407 |
| 7795  | CDPF1     | 583.8733 | -0.47367 | 0.136647 | -3.4664  | 0.000527 | 0.001799 | 696.0389 | 674.4114 | 667.9021 | 433.0326 | 528.3603 | 503.4947 |
| 16622 | LOC103226 | 71.7611  | -0.47371 | 0.304718 | -1.55457 | 0.120048 | 0.192003 | 84.02339 | 85.94365 | 80.00911 | 60.26743 | 62.03421 | 58.28881 |
| 5001  | PRPS1     | 1712.286 | -0.47387 | 0.101079 | -4.68808 | 2.76E-06 | 1.47E-05 | 2034.45  | 1882.549 | 2053.799 | 1433.026 | 1475.986 | 1393.907 |
| 4474  | EIF3E     | 12808.92 | -0.47397 | 0.094303 | -5.02605 | 5.01E-07 | 2.98E-06 | 14219.47 | 15941.18 | 14515.04 | 10741    | 11429.27 | 10007.59 |
| 9899  | SLC25A21  | 308.7032 | -0.47426 | 0.164395 | -2.88487 | 0.003916 | 0.010516 | 363.1979 | 345.4169 | 367.3462 | 279.0159 | 245.9977 | 251.2449 |
| 7222  | ZNF202    | 974.5084 | -0.47445 | 0.129622 | -3.66028 | 0.000252 | 0.000927 | 1080.378 | 1280.396 | 1039.423 | 774.5481 | 849.2269 | 823.0782 |
| 5619  | SNAPC5    | 1130.432 | -0.47448 | 0.108744 | -4.36332 | 1.28E-05 | 6.06E-05 | 1335.701 | 1258.5   | 1347.632 | 982.1359 | 939.0696 | 919.5562 |
| 5866  | PPP1R26   | 2961.37  | -0.47452 | 0.112057 | -4.23464 | 2.29E-05 | 0.000104 | 3567.47  | 3237.941 | 3536.403 | 2370.519 | 2261.04  | 2794.848 |
| 22812 | LOC119626 | 10.50324 | -0.47454 | 0.804131 | -0.59013 | 0.555101 | 0.646904 | 14.09425 | 14.23271 | 8.348776 | 4.464254 | 12.83466 | 9.044815 |
| 6976  | UBTF      | 6722.309 | -0.47472 | 0.126775 | -3.74457 | 0.000181 | 0.000689 | 7211.917 | 9403.988 | 6841.127 | 5640.585 | 5369.168 | 5867.07  |
| 5640  | TSR1      | 5326.271 | -0.47473 | 0.109046 | -4.35344 | 1.34E-05 | 6.32E-05 | 6206.889 | 6832.247 | 5549.849 | 4439.701 | 4156.292 | 4772.647 |
| 8797  | PRPF38A   | 1819.265 | -0.47491 | 0.14956  | -3.17537 | 0.001496 | 0.004522 | 1795.932 | 2652.758 | 1899.347 | 1535.703 | 1495.238 | 1536.614 |
| 9454  | ABITRAM   | 858.2005 | -0.47508 | 0.15854  | -2.99657 | 0.00273  | 0.007678 | 849.4493 | 1222.371 | 921.1483 | 700.8879 | 767.9407 | 687.406  |
| 17932 | RIMKLA    | 82.92042 | -0.47516 | 0.350781 | -1.35457 | 0.175555 | 0.260268 | 106.791  | 82.11177 | 97.40239 | 75.89232 | 94.12087 | 41.20416 |
| 4880  | TIMM21    | 1601.579 | -0.47525 | 0.1      | -4.75246 | 2.01E-06 | 1.09E-05 | 1850.683 | 1941.67  | 1794.987 | 1359.365 | 1341.222 | 1321.548 |
| 22255 | GNGT2     | 13.39934 | -0.47534 | 0.696296 | -0.68267 | 0.494815 | 0.591088 | 14.09425 | 17.51718 | 14.61036 | 11.16063 | 14.97377 | 8.039836 |
| 23814 | LOC103222 | 5.972759 | -0.47536 | 1.09334  | -0.43478 | 0.663723 | 0.740916 | 7.047123 | 2.189647 | 11.82743 | 4.464254 | 4.278221 | 6.029877 |
| 4152  | FEZ2      | 2677.229 | -0.47541 | 0.090452 | -5.25596 | 1.47E-07 | 9.43E-07 | 3128.38  | 3187.579 | 3029.91  | 2227.663 | 2190.449 | 2299.393 |
| 5512  | POMGNT1   | 3282.277 | -0.47574 | 0.107958 | -4.40673 | 1.05E-05 | 5.06E-05 | 4097.631 | 3509.457 | 3856.439 | 2600.428 | 2626.828 | 3002.879 |
| 4707  | SPRING1   | 3881.479 | -0.47581 | 0.097494 | -4.88043 | 1.06E-06 | 5.98E-06 | 4358.374 | 4836.383 | 4358.757 | 3153.995 | 3125.241 | 3456.124 |
| 19486 | LOC119620 | 40.42367 | -0.47585 | 0.431351 | -1.10317 | 0.269953 | 0.368301 | 58.54533 | 36.12918 | 45.91827 | 29.01765 | 42.78221 | 30.14938 |
| 5683  | LONRF1    | 1054.829 | -0.476   | 0.1098   | -4.33516 | 1.46E-05 | 6.81E-05 | 1232.704 | 1264.521 | 1185.526 | 899.5472 | 849.2269 | 897.4467 |
| 7309  | TUT4      | 3037.673 | -0.47611 | 0.131066 | -3.63257 | 0.000281 | 0.001021 | 3191.805 | 4262.696 | 3148.88  | 2441.947 | 2613.993 | 2566.718 |
| 7078  | AGGF1     | 3329.984 | -0.47617 | 0.12859  | -3.70298 | 0.000213 | 0.0008   | 3547.413 | 4653     | 3424.39  | 2743.284 | 2746.618 | 2865.196 |
| 16157 | LOC103233 | 92.26228 | -0.47637 | 0.291226 | -1.63574 | 0.101895 | 0.16766  | 115.4644 | 99.62895 | 109.2298 | 75.89232 | 59.8951  | 93.46309 |
| 23773 | TRNAV-AA  | 5.949482 | -0.47648 | 1.080126 | -0.44113 | 0.659118 | 0.737082 | 11.9259  | 2.737059 | 6.261582 | 4.464254 | 4.278221 | 6.029877 |
| 16854 | LOC103225 | 66.78136 | -0.47652 | 0.314569 | -1.51482 | 0.129818 | 0.204759 | 79.14461 | 77.18507 | 76.53045 | 55.80317 | 57.75599 | 54.26889 |
| 5093  | PYCR2     | 2306.249 | -0.47652 | 0.102853 | -4.63298 | 3.60E-06 | 1.88E-05 | 2706.095 | 2641.262 | 2710.569 | 1944.183 | 1754.071 | 2081.312 |
| 4850  | DYNC2L1   | 1730.089 | -0.47653 | 0.099655 | -4.78183 | 1.74E-06 | 9.52E-06 | 1982.952 | 2106.441 | 1947.352 | 1484.364 | 1452.456 | 1406.971 |
| 5677  | TAF1B     | 1270.504 | -0.47654 | 0.109857 | -4.33777 | 1.44E-05 | 6.74E-05 | 1497.785 | 1487.318 | 1454.774 | 1078.117 | 975.4345 | 1129.597 |
| 24678 | LOC119615 | 2.878944 | -0.47662 | 1.573357 | -0.30293 | 0.761941 | 0.82082  | 4.878777 | 2.189647 | 2.782925 | 0        | 6.417332 | 1.004979 |
| 14192 | ZBTB26    | 145.3498 | -0.47666 | 0.24091  | -1.97857 | 0.047864 | 0.089662 | 178.8885 | 169.1503 | 160.7139 | 91.51721 | 141.1813 | 130.6473 |
| 8689  | HTATSF1   | 5661.725 | -0.4767  | 0.14868  | -3.20625 | 0.001345 | 0.004114 | 5702.749 | 8446.017 | 5618.727 | 4636.128 | 4616.201 | 4950.529 |
| 22130 | LOC103236 | 21.64292 | -0.47674 | 0.677475 | -0.7037  | 0.481622 | 0.578577 | 14.63633 | 40.50847 | 19.48048 | 33.4819  | 10.69555 | 11.05477 |
| 9571  | CUNH1orf  | 537.1186 | -0.47686 | 0.160704 | -2.96734 | 0.003004 | 0.008344 | 568.6486 | 724.2258 | 578.1528 | 484.3716 | 466.3261 | 400.9868 |
| 8505  | BMS1      | 1964.333 | -0.47687 | 0.146479 | -3.25553 | 0.001132 | 0.003538 | 2068.602 | 2835.046 | 1956.397 | 1613.828 | 1576.525 | 1735.6   |
| 4297  | LOC103226 | 4785.904 | -0.47734 | 0.092552 | -5.15758 | 2.50E-07 | 1.55E-06 | 5967.287 | 5422.661 | 5323.041 | 3848.187 | 4092.119 | 4062.127 |
| 21502 | SFN       | 18.57251 | -0.47767 | 0.594791 | -0.80309 | 0.42192  | 0.52166  | 22.76763 | 24.08612 | 18.08902 | 11.16063 | 19.252   | 16.07967 |
| 8656  | RRP15     | 1249.038 | -0.47787 | 0.148672 | -3.21424 | 0.001308 | 0.004017 | 1273.903 | 1776.351 | 1308.671 | 1080.349 | 1078.112 | 976.84   |
| 5211  | EPHA7     | 4075.957 | -0.47801 | 0.104515 | -4.57356 | 4.80E-06 | 2.45E-05 | 4487.391 | 5251.869 | 4499.295 | 3194.174 | 3482.472 | 3540.543 |
| 6994  | PDE8A     | 3728.646 | -0.47825 | 0.128016 | -3.73584 | 0.000187 | 0.000711 | 3958.315 | 5134.723 | 3935.057 | 2970.961 | 2966.946 | 3405.875 |
| 7603  | WRAP53    | 1499.922 | -0.47865 | 0.135804 | -3.52459 | 0.000424 | 0.001483 | 1961.811 | 1550.27  | 1734.458 | 1116.063 | 1212.876 | 1424.056 |
| 4218  | BLMH      | 4156.519 | -0.47907 | 0.092005 | -5.20697 | 1.92E-07 | 1.21E-06 | 4834.868 | 5049.874 | 4641.92  | 3421.851 | 3328.456 | 3662.145 |
| 16369 | LOC103224 | 82.30963 | -0.47909 | 0.300544 | -1.59408 | 0.110918 | 0.180142 | 106.2489 | 89.22813 | 91.83654 | 82.5887  | 55.61688 | 68.3386  |
| 6654  | KLHL7     | 1494.744 | -0.47913 | 0.123606 | -3.87624 | 0.000106 | 0.000424 | 1845.262 | 1516.878 | 1862.473 | 1290.169 | 1157.259 | 1296.424 |
| 7028  | ERG28     | 1019.755 | -0.47917 | 0.128697 | -3.72325 | 0.000197 | 0.000744 | 1108.567 | 1332.4   | 1125.693 | 819.1906 | 817.1403 | 915.5363 |
| 9062  | FOXRED1   | 1463.739 | -0.47925 | 0.154996 | -3.09199 | 0.001988 | 0.005832 | 1937.959 | 1359.224 | 1822.816 | 1116.063 | 1144.424 | 1401.946 |
| 8247  | HINT2     | 1357.909 | -0.47968 | 0.144013 | -3.33079 | 0.000866 | 0.002792 | 1733.592 | 1274.922 | 1738.633 | 1167.402 | 1046.025 | 1186.881 |
| 3887  | ETNK1     | 3773.122 | -0.47974 | 0.087909 | -5.45721 | 4.84E-08 | 3.31E-07 | 4543.226 | 4199.743 | 4442.941 | 3127.21  | 3133.797 | 3191.815 |
| 5403  | SLC35B1   | 2416.355 | -0.47993 | 0.107547 | -4.46248 | 8.10E-06 | 3.99E-05 | 2860.048 | 2750.197 | 2842.063 | 1995.522 | 1818.244 | 2232.059 |
| 4945  | ERGIC1    | 11338.09 | -0.48004 | 0.10175  | -4.71783 | 2.38E-06 | 1.28E-05 | 12803.54 | 14405.14 | 12419.5  | 9444.129 | 8727.572 | 10228.68 |
| 7228  | MRPL40    | 698.9266 | -0.48024 | 0.131246 | -3.65908 | 0.000253 | 0.000931 | 759.463  | 872.027  | 807.7441 | 622.7634 | 581.8381 | 549.7238 |
| 5714  | PLXNA1    | 5075.303 | -0.48048 | 0.111271 | -4.31813 | 1.57E-05 | 7.32E-05 | 6165.148 | 5351.498 | 6229.579 | 4214.256 | 3816.173 | 4675.164 |
| 8880  | GEMIN2    | 667.0785 | -0.48052 | 0.152626 | -3.14838 | 0.001642 | 0.004915 | 858.1227 | 641.5666 | 833.4862 | 549.1032 | 543.3341 | 576.8582 |
| 5671  | NARS2     | 1122.881 | -0.48053 | 0.110757 | -4.33859 | 1.43E-05 | 6.72E-05 | 1354.132 | 1326.379 | 1246.751 | 892.8508 | 943.3478 | 973.8251 |
| 6176  | RNF169    | 2877.142 | -0.48059 | 0.117552 | -4.08829 | 4.35E-05 | 0.000187 | 3154.943 | 3773.31  | 3132.183 | 2446.411 | 2171.197 | 2584.807 |
| 23428 | LOC103216 | 7.077817 | -0.48094 | 0.970713 | -0.49545 | 0.620284 | 0.703895 | 8.131296 | 7.116354 | 9.044508 | 4.464254 | 10.69555 | 3.014938 |
| 19794 | LOC119625 | 39.4661  | -0.481   | 0.456298 | -1.05414 | 0.291821 | 0.39194  | 46.61943 | 44.34036 | 45.91827 | 22.32127 | 53.47777 | 24.11951 |
| 21330 | MROH8     | 21.31652 | -0.48112 | 0.581261 | -0.82772 | 0.407828 | 0.508303 | 24.93597 | 25.18094 | 24.3506  | 26.78552 | 8.556443 | 18.08963 |
| 9642  | RNF214    | 956.4822 | -0.48131 | 0.163168 | -2.94978 | 0.00318  | 0.008768 | 990.9339 | 1386.047 | 969.8495 | 720.977  | 795.7492 | 875.3371 |
| 8523  | ZNF512    | 989.3833 | -0.48134 | 0.148141 | -3.24923 | 0.001157 | 0.003609 | 1057.068 | 1381.667 | 1017.159 | 816.9585 | 885.5918 | 777.8541 |
| 7133  | KMT5A     | 2329.058 | -0.48136 | 0.130622 | -3.68518 | 0.000229 | 0.000852 | 2499.018 | 3215.497 | 2428.798 | 2020.075 | 1798.992 | 2011.969 |
| 20070 | LOC119620 | 35.14603 | -0.48141 | 0.473071 | -1.01763 | 0.308853 | 0.409112 | 54.20864 | 27.918   | 41.04815 | 22.32127 | 34.22577 | 31.15436 |
| 19802 | PIP5KL1   | 36.52591 | -0.48147 | 0.457201 | -1.05308 | 0.292304 | 0.39243  | 41.19856 | 29       |          |          |          |          |



|       |           |          |          |          |          |          |          |          |          |          |          |          |          |
|-------|-----------|----------|----------|----------|----------|----------|----------|----------|----------|----------|----------|----------|----------|
| 4642  | ABCC5     | 2540.245 | -0.48185 | 0.097877 | -4.92298 | 8.52E-07 | 4.88E-06 | 2999.906 | 3028.282 | 2860.152 | 2006.682 | 2079.216 | 2267.234 |
| 4803  | RABL6     | 5449.552 | -0.48192 | 0.100157 | -4.81166 | 1.50E-06 | 8.29E-06 | 6348.373 | 6376.8   | 6337.417 | 4591.485 | 4068.588 | 4974.648 |
| 9264  | TAMM41    | 396.6616 | -0.48277 | 0.158768 | -3.04073 | 0.00236  | 0.006773 | 438.5479 | 452.7096 | 500.2309 | 312.4978 | 310.171  | 365.8125 |
| 12099 | IL1RAPL1  | 271.5612 | -0.4831  | 0.202388 | -2.38701 | 0.016986 | 0.037326 | 288.3899 | 361.2918 | 295.6858 | 245.534  | 254.5542 | 183.9112 |
| 6494  | COQ7      | 958.8482 | -0.48326 | 0.122578 | -3.94249 | 8.06E-05 | 0.00033  | 1118.866 | 1055.957 | 1182.743 | 720.977  | 836.3923 | 838.1529 |
| 6840  | EZH2      | 3536.52  | -0.48339 | 0.127146 | -3.80187 | 0.000144 | 0.000558 | 3727.386 | 4949.698 | 3692.942 | 2948.64  | 2949.834 | 2950.62  |
| 6042  | DXH38     | 2964.889 | -0.48343 | 0.116581 | -4.1467  | 3.37E-05 | 0.000148 | 3402.134 | 3719.663 | 3250.11  | 2386.144 | 2220.397 | 2802.888 |
| 7097  | PDCD5     | 3312.5   | -0.48347 | 0.130788 | -3.69659 | 0.000219 | 0.000819 | 3454.174 | 4631.651 | 3500.92  | 2926.318 | 2586.185 | 2775.753 |
| 7223  | FANCB     | 584.2979 | -0.48365 | 0.132154 | -3.65977 | 0.000252 | 0.000929 | 682.4867 | 661.8209 | 702.6887 | 453.1218 | 494.1346 | 511.5345 |
| 4525  | NELFCD    | 4383.091 | -0.48377 | 0.096757 | -4.99985 | 5.74E-07 | 3.37E-06 | 5099.949 | 5355.877 | 4885.426 | 3517.832 | 3488.889 | 3950.574 |
| 8595  | PACC1     | 429.7831 | -0.48396 | 0.149781 | -3.23109 | 0.001233 | 0.003814 | 546.4231 | 471.869  | 484.229  | 366.0688 | 359.3706 | 350.7378 |
| 22134 | SPR2      | 17.38463 | -0.48406 | 0.688514 | -0.70305 | 0.482024 | 0.578956 | 27.6464  | 11.49565 | 20.87194 | 24.5534  | 10.69555 | 9.044815 |
| 8148  | BRINP1    | 746.7161 | -0.48406 | 0.143847 | -3.36513 | 0.000765 | 0.002496 | 854.8702 | 956.3284 | 807.0484 | 544.639  | 613.9248 | 703.4856 |
| 6683  | LCLAT1    | 1941.794 | -0.48409 | 0.125297 | -3.86354 | 0.000112 | 0.000445 | 2126.063 | 2608.417 | 2062.148 | 1486.597 | 1662.089 | 1705.45  |
| 17827 | LOC119621 | 72.90888 | -0.48415 | 0.352766 | -1.37245 | 0.169924 | 0.253404 | 82.93921 | 90.87036 | 78.61764 | 60.26743 | 85.56443 | 39.1942  |
| 16913 | LOC103231 | 82.90603 | -0.48446 | 0.322012 | -1.50447 | 0.13246  | 0.208232 | 97.57555 | 111.672  | 80.00911 | 91.51721 | 51.33866 | 65.32367 |
| 9107  | LOC103234 | 1039.729 | -0.48455 | 0.157267 | -3.08105 | 0.002063 | 0.006022 | 1317.27  | 989.7206 | 1337.196 | 832.5834 | 763.6625 | 997.9446 |
| 24182 | LOC103241 | 4.166851 | -0.48476 | 1.285715 | -0.37703 | 0.706149 | 0.77632  | 8.673382 | 2.189647 | 3.478657 | 2.232127 | 6.417332 | 2.009959 |
| 6838  | SDR42E1   | 1249.058 | -0.48497 | 0.127533 | -3.80266 | 0.000143 | 0.000557 | 1585.061 | 1278.207 | 1510.433 | 1080.349 | 951.9042 | 1088.393 |
| 13730 | ZNF124    | 147.5351 | -0.48547 | 0.23515  | -2.0645  | 0.038971 | 0.075454 | 191.8986 | 159.8442 | 164.1926 | 142.8561 | 104.8164 | 121.6025 |
| 5490  | ZRANB2    | 5323.324 | -0.48562 | 0.110009 | -4.4144  | 1.01E-05 | 4.91E-05 | 5535.786 | 7064.349 | 6034.078 | 4321.398 | 4457.907 | 4526.428 |
| 6898  | RFC5      | 759.0348 | -0.48579 | 0.128624 | -3.7768  | 0.000159 | 0.000612 | 922.0889 | 821.6651 | 917.6697 | 604.9064 | 607.5074 | 680.3711 |
| 4287  | SPAG9     | 11442.15 | -0.48583 | 0.094084 | -5.16373 | 2.42E-07 | 1.50E-06 | 13283.83 | 14405.69 | 12367.32 | 9348.148 | 9230.263 | 10017.64 |
| 5228  | DEPDC5    | 2187.448 | -0.48586 | 0.106431 | -3.56498 | 5.00E-06 | 2.54E-05 | 2673.028 | 2655.495 | 2332.787 | 1745.523 | 1788.297 | 1929.561 |
| 6640  | SMARCC1   | 9095.297 | -0.48607 | 0.125219 | -3.88175 | 0.000104 | 0.000415 | 9899.039 | 12637    | 9307.494 | 7319.144 | 7236.611 | 8172.493 |
| 3884  | ZZZ3      | 5116     | -0.48613 | 0.089044 | -5.45936 | 4.78E-08 | 3.27E-07 | 5925.546 | 6287.572 | 5693.17  | 4225.416 | 4408.707 | 4155.59  |
| 5689  | CASP8     | 3361.741 | -0.48625 | 0.112257 | -4.33161 | 1.48E-05 | 6.92E-05 | 3698.113 | 4478.376 | 3594.148 | 2772.302 | 2740.201 | 2887.306 |
| 7064  | NME6      | 1657.196 | -0.48641 | 0.131251 | -3.70598 | 0.000211 | 0.000792 | 2076.191 | 1634.572 | 2096.239 | 1285.705 | 1354.057 | 1496.414 |
| 5015  | GPBP1     | 5940.936 | -0.48659 | 0.103967 | -4.68023 | 2.87E-06 | 1.52E-05 | 6577.676 | 7823.062 | 6398.641 | 4928.536 | 4986.267 | 4931.434 |
| 14081 | LOC119621 | 118.329  | -0.48669 | 0.243596 | -1.99794 | 0.045723 | 0.086325 | 134.4374 | 139.59   | 141.2335 | 98.21359 | 91.98176 | 104.5179 |
| 22360 | LOC103241 | 15.10364 | -0.4868  | 0.731986 | -0.66504 | 0.506027 | 0.601643 | 20.59928 | 16.42235 | 14.61036 | 17.85702 | 17.11289 | 4.019918 |
| 8172  | DENND2C   | 457.122  | -0.48682 | 0.145103 | -3.35499 | 0.000794 | 0.002582 | 549.1335 | 549.054  | 502.318  | 354.9082 | 406.431  | 380.8872 |
| 4475  | RCN1      | 16583.69 | -0.48687 | 0.096876 | -5.02567 | 5.02E-07 | 2.98E-06 | 18839.13 | 21413.66 | 17816.98 | 13508.83 | 13651.8  | 14271.71 |
| 4896  | TMEM87A   | 1914.81  | -0.48694 | 0.102644 | -4.74401 | 2.10E-06 | 1.14E-05 | 2412.826 | 2123.41  | 2168.595 | 1593.739 | 1589.359 | 1600.932 |
| 7552  | LOC119618 | 6742.346 | -0.48695 | 0.137509 | -3.54121 | 0.000398 | 0.001402 | 7198.907 | 9742.835 | 6665.107 | 5437.461 | 5929.615 | 5480.153 |
| 7177  | SKA1      | 853.5868 | -0.4874  | 0.132727 | -3.67224 | 0.00024  | 0.000891 | 958.9508 | 1123.289 | 905.8422 | 743.2983 | 686.6545 | 703.4856 |
| 19083 | LOC103231 | 45.11025 | -0.48772 | 0.416136 | -1.17203 | 0.241184 | 0.336    | 49.32986 | 60.2153  | 46.614   | 40.17829 | 49.19955 | 25.12449 |
| 8104  | BPTF      | 6300.846 | -0.48774 | 0.14432  | -3.37956 | 0.000726 | 0.002382 | 6309.885 | 9353.078 | 6404.903 | 5203.088 | 5208.734 | 5325.386 |
| 6198  | LCORL     | 1427.12  | -0.48781 | 0.119701 | -4.07518 | 4.60E-05 | 0.000197 | 1587.771 | 1862.295 | 1547.307 | 1129.456 | 1262.075 | 1173.816 |
| 18907 | LOC119621 | 39.48723 | -0.48814 | 0.406098 | -1.20202 | 0.229357 | 0.322497 | 42.28274 | 47.07742 | 48.7012  | 33.4819  | 34.22577 | 31.15436 |
| 5901  | PPIL2     | 2358.352 | -0.48816 | 0.115916 | -4.21136 | 2.54E-05 | 0.000114 | 2560.816 | 3124.627 | 2578.38  | 1962.04  | 1861.026 | 2063.223 |
| 13490 | NUDT16L1  | 554.7161 | -0.48822 | 0.23154  | -2.10856 | 0.034982 | 0.06894  | 802.2878 | 395.7787 | 746.5198 | 477.6752 | 408.5701 | 497.4648 |
| 20879 | LOC119621 | 25.09406 | -0.48825 | 0.546715 | -0.89306 | 0.371824 | 0.47344  | 41.74065 | 25.18094 | 20.87194 | 24.5534  | 17.11289 | 21.10457 |
| 6578  | LOC103241 | 5411.698 | -0.48839 | 0.124934 | -3.90918 | 9.26E-05 | 0.000374 | 5766.173 | 7458.486 | 5737.001 | 4158.453 | 4489.993 | 4860.081 |
| 5345  | RAD18     | 1271.325 | -0.48864 | 0.108785 | -4.49179 | 7.06E-06 | 3.51E-05 | 1523.805 | 1488.96  | 1445.73  | 1051.332 | 992.5473 | 1125.577 |
| 5259  | LOC103221 | 2612.651 | -0.48888 | 0.107489 | -4.54815 | 5.41E-06 | 2.74E-05 | 2848.664 | 3409.828 | 2893.547 | 2200.877 | 2173.336 | 2149.651 |
| 7521  | RDH13     | 697.0526 | -0.48913 | 0.13771  | -3.55192 | 0.000382 | 0.001352 | 859.2069 | 719.2991 | 866.8813 | 558.0317 | 566.8643 | 612.0325 |
| 12418 | FAM50B    | 214.4349 | -0.48922 | 0.211143 | -2.31702 | 0.020503 | 0.043893 | 269.959  | 222.7966 | 258.8121 | 209.8199 | 143.3204 | 181.9013 |
| 9731  | GTPBP8    | 298.7108 | -0.48949 | 0.167593 | -2.92068 | 0.003493 | 0.009542 | 327.9623 | 359.6496 | 357.6059 | 247.7661 | 263.1106 | 236.1702 |
| 4259  | DBN1      | 16165.23 | -0.48961 | 0.094442 | -5.18423 | 2.17E-07 | 1.35E-06 | 18443.95 | 19287.76 | 13348.12 | 12284.91 | 14701.84 |          |
| 18557 | LOC103211 | 47.20606 | -0.48963 | 0.394179 | -1.24216 | 0.214176 | 0.306831 | 69.38706 | 43.79295 | 52.17985 | 40.17829 | 38.50399 | 39.1942  |
| 10947 | SLC25A26  | 563.9853 | -0.48992 | 0.185602 | -2.63961 | 0.0083   | 0.020157 | 809.877  | 512.3775 | 656.7704 | 473.2109 | 417.1266 | 514.5495 |
| 22770 | LOC103241 | 14.36778 | -0.49002 | 0.820604 | -0.59715 | 0.550407 | 0.642625 | 11.38381 | 22.44388 | 15.30609 | 20.08914 | 14.97377 | 2.009959 |
| 6446  | TIMM17B   | 1648.869 | -0.49018 | 0.123742 | -3.96128 | 7.45E-05 | 0.000307 | 2092.995 | 1667.964 | 2019.708 | 1430.793 | 1272.771 | 1408.981 |
| 7537  | KRAS      | 2193.675 | -0.49021 | 0.138215 | -3.54673 | 0.00039  | 0.001376 | 2396.022 | 3107.657 | 2185.988 | 1745.523 | 1837.496 | 1889.361 |
| 11036 | TMEM86B   | 282.624  | -0.49043 | 0.187115 | -2.62102 | 0.008767 | 0.021117 | 364.8241 | 282.4645 | 342.2998 | 223.2127 | 258.8324 | 224.1104 |
| 10886 | ANKS1B    | 239.237  | -0.49063 | 0.184957 | -2.65267 | 0.007986 | 0.0195   | 270.5011 | 301.0765 | 265.0737 | 205.3557 | 207.4937 | 185.9212 |
| 6438  | CDK6      | 50196.58 | -0.49087 | 0.123796 | -3.96514 | 7.34E-05 | 0.000303 | 53011.71 | 70680.17 | 52275.17 | 40676.05 | 40373.57 | 44162.82 |
| 10045 | SIX4      | 348.2254 | -0.4909  | 0.172133 | -2.85183 | 0.004347 | 0.011504 | 356.6928 | 462.0156 | 401.437  | 303.5693 | 280.2235 | 285.4142 |
| 27469 | LOC119621 | 0.58099  | -0.49124 | 3.043749 | -0.16139 | 0.871785 | NA       | 0.542086 | 0.547412 | 1.391463 | 0        | 0        | 1.004979 |
| 29382 | LOC119621 | 0.58099  | -0.49124 | 3.043749 | -0.16139 | 0.871785 | NA       | 0.542086 | 0.547412 | 1.391463 | 0        | 0        | 1.004979 |
| 16261 | DUSP9     | 83.00989 | -0.49128 | 0.304135 | -1.61532 | 0.106241 | 0.173693 | 98.65972 | 95.24966 | 94.61947 | 78.12444 | 79.14709 | 52.25893 |
| 4655  | NUDCD1    | 2629.924 | -0.49142 | 0.099982 | -4.9151  | 8.87E-07 | 5.07E-06 | 3085.556 | 3287.208 | 2848.324 | 2118.289 | 2233.232 | 2206.935 |
| 19089 | LOC119621 | 60.35588 | -0.49147 | 0.419549 | -1.17141 | 0.241433 | 0.33624  | 86.73382 | 37.224   | 86.96642 | 49.10679 | 59.8951  | 42.20914 |
| 4018  | LOC103231 | 3686.016 | -0.4915  | 0.091739 | -5.35759 | 8.43E-08 | 5.58E-07 | 4196.833 | 4552.277 | 4178.563 | 3002.211 | 3005.45  | 3180.76  |
| 8462  | FBXW4     | 1281.204 | -0.49179 | 0.150635 | -3.26478 | 0.001095 | 0.003442 | 1677.757 | 1277.659 | 1551.481 | 1004.457 | 932.6523 | 1255.219 |
| 9149  | ZHX2      | 653.2505 | -0.49182 | 0.160367 | -3.06683 | 0.002163 | 0.006286 | 680.8605 | 907.0614 | 698.5143 | 482.1394 | 554.0297 | 584.8981 |
| 24138 | TRNAF-GA  | 3.853876 | -0.49184 | 1.279788 | -0.38431 | 0.700747 | 0.771798 | 2.168345 | 4.379295 | 6.957314 | 4.464254 | 2.139111 | 3.014938 |
| 23567 | LOC119621 | 5.96301  | -0.49203 | 1.036557 | -0.47467 | 0.635019 | 0.716352 | 5.420864 | 4.926706 | 10.43597 | 6.696381 | 4.278221 | 4.019918 |
| 5558  | PDZK1     | 1305.399 | -0.49203 | 0.112085 | -4.38977 | 1.13E-05 | 5.43E-05 | 1477.185 | 1647.162 | 1456.166 | 1033.475 | 1088.807 | 1129.597 |
| 4979  | POFUT1    | 2567.735 | -0.49204 | 0.104701 | -4.69952 | 2.61E-06 | 1.39E-05 | 3021.047 | 3126.816 | 2864.3   |          |          |          |



|       |           |          |          |          |          |          |          |          |          |          |          |          |          |
|-------|-----------|----------|----------|----------|----------|----------|----------|----------|----------|----------|----------|----------|----------|
| 27652 | TRNAD-GU  | 0.580102 | -0.49247 | 3.387038 | -0.1454  | 0.884397 | NA       | 1.084173 | 0        | 1.391463 | 0        | 0        | 1.004979 |
| 29011 | LOC119622 | 0.580102 | -0.49247 | 3.387038 | -0.1454  | 0.884397 | NA       | 1.084173 | 0        | 1.391463 | 0        | 0        | 1.004979 |
| 3678  | MDH2      | 16454.88 | -0.49247 | 0.086836 | -5.67129 | 1.42E-08 | 1.02E-07 | 19621.36 | 19152.3  | 18943.37 | 13669.55 | 12770.49 | 14572.2  |
| 4583  | PLK1      | 2678.548 | -0.49251 | 0.099463 | -4.95173 | 7.36E-07 | 4.27E-06 | 3074.714 | 3323.885 | 3000.689 | 2200.877 | 2113.441 | 2357.682 |
| 8464  | KIF20B    | 7830.611 | -0.49263 | 0.150942 | -3.26367 | 0.0011   | 0.003454 | 7804.96  | 11866.25 | 7792.887 | 6292.366 | 6652.634 | 6574.576 |
| 4413  | WDR41     | 1899.263 | -0.49266 | 0.097156 | -5.07082 | 3.96E-07 | 2.39E-06 | 2255.079 | 2248.768 | 2159.55  | 1609.364 | 1503.795 | 1619.022 |
| 7056  | ZNF652    | 1559.662 | -0.49286 | 0.132896 | -3.70857 | 0.000208 | 0.000785 | 1741.181 | 2113.557 | 1618.967 | 1314.723 | 1178.65  | 1390.892 |
| 22652 | LOC103217 | 10.29945 | -0.4929  | 0.801374 | -0.61507 | 0.53851  | 0.63201  | 14.63633 | 10.94824 | 11.1317  | 4.464254 | 8.556443 | 12.05975 |
| 4668  | SLC37A3   | 1999.92  | -0.49295 | 0.100509 | -4.90448 | 9.37E-07 | 5.33E-06 | 2458.362 | 2256.431 | 2304.958 | 1589.274 | 1642.837 | 1747.659 |
| 6605  | LOC103225 | 3034.85  | -0.49304 | 0.12641  | -3.90028 | 9.61E-05 | 0.000387 | 3314.858 | 4188.248 | 3145.402 | 2439.715 | 2438.586 | 2682.29  |
| 11564 | RPH3AL    | 196.8707 | -0.49309 | 0.197051 | -2.50237 | 0.012336 | 0.028362 | 235.2655 | 216.2277 | 240.0273 | 154.0168 | 166.8506 | 168.8366 |
| 3902  | CSNK1D    | 5089.096 | -0.49319 | 0.090635 | -5.44151 | 5.28E-08 | 3.60E-07 | 5841.523 | 6051.09  | 5967.288 | 4142.828 | 4004.415 | 4527.433 |
| 6919  | ACSL3     | 19519.72 | -0.49319 | 0.130919 | -3.76718 | 0.000165 | 0.000634 | 20239.88 | 28182.95 | 20049.59 | 16115.96 | 16092.53 | 16437.44 |
| 5883  | MCRS1     | 2311.57  | -0.49321 | 0.11678  | -4.2234  | 2.41E-05 | 0.000109 | 2765.183 | 2598.016 | 2754.4   | 1904.004 | 1677.063 | 2170.756 |
| 20031 | CNKSR1    | 27.62227 | -0.49323 | 0.482273 | -1.02272 | 0.306441 | 0.406706 | 30.89892 | 35.03436 | 30.61218 | 24.5534  | 23.53022 | 21.10457 |
| 5254  | SLC16A1   | 3979.218 | -0.49338 | 0.108412 | -4.55102 | 5.34E-06 | 2.70E-05 | 4515.037 | 5216.287 | 4231.438 | 3227.656 | 3208.666 | 3476.224 |
| 5192  | TLN2      | 2343.281 | -0.49346 | 0.107686 | -4.58242 | 4.60E-06 | 2.35E-05 | 2793.913 | 2734.869 | 2700.829 | 1879.451 | 1781.879 | 2168.746 |
| 14169 | LOC103246 | 112.1585 | -0.49358 | 0.249033 | -1.98199 | 0.047481 | 0.089068 | 171.727  | 135.7581 | 126.6231 | 91.51721 | 89.84265 | 97.48301 |
| 11871 | LOC103226 | 330.7658 | -0.49382 | 0.203007 | -2.43251 | 0.014995 | 0.033577 | 399.5177 | 295.6024 | 464.0528 | 281.248  | 290.9191 | 253.2548 |
| 8800  | THUMPDI   | 969.7038 | -0.49386 | 0.155584 | -3.17426 | 0.001502 | 0.004538 | 1052.19  | 1387.689 | 963.5879 | 747.7625 | 827.8358 | 839.1579 |
| 5356  | CHCHD4    | 1377.011 | -0.49391 | 0.11011  | -4.48559 | 7.27E-06 | 3.61E-05 | 1535.731 | 1729.821 | 1561.917 | 1174.099 | 1170.094 | 1090.403 |
| 4598  | ZNF692    | 2143.738 | -0.49394 | 0.09992  | -4.94336 | 7.68E-07 | 4.44E-06 | 2453.483 | 2599.111 | 2475.412 | 1687.488 | 1745.514 | 1901.421 |
| 5775  | PRKAA2    | 5556.396 | -0.49402 | 0.115247 | -4.2866  | 1.81E-05 | 8.35E-05 | 6003.607 | 7582.748 | 5910.238 | 4564.7   | 4562.723 | 4714.359 |
| 4070  | TMX3      | 4585.266 | -0.49419 | 0.092913 | -5.31889 | 1.04E-07 | 6.82E-07 | 5318.951 | 5700.199 | 5073.969 | 3669.617 | 3786.226 | 3962.634 |
| 11585 | RNF24     | 196.7844 | -0.49426 | 0.197853 | -2.49813 | 0.012485 | 0.02865  | 239.0601 | 219.5121 | 233.7657 | 158.481  | 154.016  | 175.8714 |
| 10955 | LOC103215 | 673.6463 | -0.49446 | 0.187393 | -2.63862 | 0.008325 | 0.020202 | 672.1871 | 1034.061 | 656.7704 | 526.782  | 605.3683 | 546.7088 |
| 4752  | DAXX      | 2918.425 | -0.4945  | 0.102119 | -4.84241 | 1.28E-06 | 7.18E-06 | 3475.316 | 3390.669 | 3384.037 | 2370.519 | 2226.814 | 2663.196 |
| 19338 | LOC119621 | 41.3708  | -0.49463 | 0.438286 | -1.12856 | 0.259082 | 0.356156 | 47.16151 | 50.9093  | 45.91827 | 53.57105 | 23.53022 | 27.13445 |
| 4604  | MRPL24    | 1756.804 | -0.49463 | 0.100108 | -4.941   | 7.77E-07 | 4.49E-06 | 2106.006 | 1948.239 | 2113.632 | 1450.883 | 1424.648 | 1497.419 |
| 8439  | FDXACB1   | 615.313  | -0.49474 | 0.151214 | -3.27179 | 0.001069 | 0.003367 | 779.5202 | 623.5021 | 760.4344 | 504.4607 | 464.187  | 559.7736 |
| 4136  | ACLY      | 47328.94 | -0.49482 | 0.093953 | -5.26664 | 1.39E-07 | 8.93E-07 | 55377.38 | 57985.14 | 52747.57 | 37792.14 | 37047.26 | 43024.18 |
| 22526 | LOC119624 | 11.41837 | -0.49494 | 0.777469 | -0.63661 | 0.524381 | 0.618842 | 11.9259  | 16.96977 | 11.1317  | 4.464254 | 14.97377 | 9.044815 |
| 5153  | HS6ST2    | 2597.57  | -0.49506 | 0.107603 | -4.60082 | 4.21E-06 | 2.17E-05 | 3118.081 | 3072.075 | 2934.595 | 2142.842 | 1938.034 | 2379.791 |
| 18844 | SLC30A3   | 49.09584 | -0.49535 | 0.408601 | -1.21232 | 0.225392 | 0.317985 | 61.79785 | 53.64636 | 55.65851 | 62.49956 | 27.80844 | 33.16432 |
| 5782  | PPP4R3A   | 5289.48  | -0.49546 | 0.11566  | -4.28375 | 1.84E-05 | 8.45E-05 | 5722.806 | 7219.267 | 5625.684 | 4399.522 | 4280.36  | 4489.243 |
| 7656  | BUD13     | 1105.297 | -0.49546 | 0.141221 | -3.50843 | 0.000451 | 0.001565 | 1202.89  | 1519.615 | 1160.48  | 912.9399 | 844.9487 | 990.9098 |
| 7280  | DCP1B     | 962.9028 | -0.49557 | 0.136172 | -3.63931 | 0.000273 | 0.000998 | 1032.132 | 1294.629 | 1051.946 | 758.9232 | 859.9225 | 779.8641 |
| 8573  | ZFHX4     | 612.8376 | -0.49561 | 0.153181 | -3.23543 | 0.001215 | 0.003766 | 645.6249 | 837.5401 | 665.8149 | 504.4607 | 541.195  | 482.3901 |
| 4868  | NF1       | 6774.778 | -0.49563 | 0.104101 | -4.76103 | 1.93E-06 | 1.05E-05 | 7541.506 | 8657.318 | 7589.734 | 5145.053 | 5642.974 | 6072.086 |
| 14119 | TESK2     | 127.5404 | -0.49564 | 0.248997 | -1.99056 | 0.04653  | 0.087606 | 152.8684 | 135.2107 | 157.2353 | 113.8385 | 117.6511 | 88.43819 |
| 4175  | LRRC58    | 4931.489 | -0.49569 | 0.094534 | -5.24356 | 1.58E-07 | 1.00E-06 | 5987.886 | 5803.66  | 5527.586 | 3973.186 | 3886.764 | 4409.85  |
| 4263  | XPO6      | 10354.55 | -0.4963  | 0.095809 | -5.18012 | 2.22E-07 | 1.38E-06 | 12472.87 | 12026.09 | 11865.7  | 8390.565 | 7923.266 | 9448.817 |
| 15332 | LOC103244 | 90.99853 | -0.49631 | 0.279901 | -1.77315 | 0.076205 | 0.132127 | 113.2961 | 108.935  | 96.01093 | 78.12444 | 81.28621 | 68.3386  |
| 6308  | XAB2      | 1521.718 | -0.49638 | 0.123425 | -4.02171 | 5.78E-05 | 0.000244 | 1938.501 | 1585.305 | 1824.903 | 1220.973 | 1180.789 | 1379.837 |
| 20411 | LOC103238 | 25.11352 | -0.49646 | 0.517362 | -0.95961 | 0.337253 | 0.439266 | 36.31979 | 26.82318 | 25.04633 | 17.85702 | 23.53022 | 21.10457 |
| 5719  | PATZ1     | 1552.157 | -0.49661 | 0.115105 | -4.31443 | 1.60E-05 | 7.44E-05 | 1906.518 | 1762.119 | 1788.725 | 1267.848 | 1163.676 | 1424.056 |
| 4729  | OGFOD1    | 2114.162 | -0.49662 | 0.102081 | -4.86489 | 1.15E-06 | 6.44E-06 | 2360.786 | 2673.012 | 2390.533 | 1781.237 | 1700.593 | 1778.814 |
| 5582  | AEN       | 2212.307 | -0.49685 | 0.113425 | -4.38047 | 1.18E-05 | 5.64E-05 | 2850.832 | 2355.513 | 2567.249 | 1810.255 | 1726.262 | 1963.73  |
| 6956  | JADE3     | 1042.485 | -0.49714 | 0.132443 | -3.75363 | 0.000174 | 0.000666 | 1187.169 | 1339.517 | 1140.999 | 812.4942 | 797.8883 | 976.84   |
| 21173 | LOC119626 | 19.23462 | -0.49714 | 0.581678 | -0.85467 | 0.392733 | 0.493097 | 22.76769 | 18.612   | 26.43779 | 13.39276 | 17.11289 | 17.08465 |
| 5156  | STYXL1    | 1418.626 | -0.49732 | 0.108132 | -4.59921 | 4.24E-06 | 2.19E-05 | 1746.06  | 1551.912 | 1681.583 | 1171.867 | 1225.71  | 1134.622 |
| 22474 | LOC119628 | 12.66158 | -0.49742 | 0.773531 | -0.64305 | 0.520194 | 0.615349 | 22.22554 | 13.13788 | 8.348776 | 13.39276 | 12.83466 | 6.029877 |
| 16007 | LOC103230 | 82.01529 | -0.4975  | 0.299074 | -1.66345 | 0.096222 | 0.159808 | 80.22878 | 105.6505 | 102.2725 | 71.42806 | 64.17332 | 68.3386  |
| 8002  | NTMT1     | 1202.511 | -0.49754 | 0.14584  | -3.41157 | 0.000646 | 0.002146 | 1615.417 | 1152.302 | 1459.644 | 957.5825 | 949.7651 | 1080.353 |
| 5562  | ALKBH8    | 1809.485 | -0.49779 | 0.113424 | -4.38879 | 1.14E-05 | 5.45E-05 | 2065.891 | 2338.543 | 1949.439 | 1591.507 | 1433.204 | 1478.325 |
| 9923  | RRG       | 342.3716 | -0.49798 | 0.172942 | -2.87944 | 0.003984 | 0.010673 | 427.1641 | 363.4814 | 411.1772 | 325.8905 | 248.1368 | 278.3793 |
| 5103  | GGA2      | 1616.979 | -0.498   | 0.107632 | -4.62686 | 3.71E-06 | 1.93E-05 | 1985.12  | 1900.614 | 1799.857 | 1299.098 | 1277.049 | 1440.136 |
| 27482 | LOC119629 | 0.581878 | -0.4982  | 3.38409  | -0.14722 | 0.88296  | NA       | 0        | 1.094824 | 1.391463 | 0        | 0        | 1.004979 |
| 27644 | TRNAM-C4  | 0.581878 | -0.4982  | 3.38409  | -0.14722 | 0.88296  | NA       | 0        | 1.094824 | 1.391463 | 0        | 0        | 1.004979 |
| 27701 | DUXA      | 0.581878 | -0.4982  | 3.38409  | -0.14722 | 0.88296  | NA       | 0        | 1.094824 | 1.391463 | 0        | 0        | 1.004979 |
| 28947 | LOC119621 | 0.581878 | -0.4982  | 3.38409  | -0.14722 | 0.88296  | NA       | 0        | 1.094824 | 1.391463 | 0        | 0        | 1.004979 |
| 11096 | HAPLN3    | 419.5898 | -0.49847 | 0.191239 | -2.60651 | 0.009147 | 0.021915 | 562.6857 | 388.115  | 527.3644 | 330.3548 | 308.0319 | 400.9868 |
| 4847  | ZBTB37    | 2587.204 | -0.49848 | 0.104222 | -4.78286 | 1.73E-06 | 9.48E-06 | 3029.721 | 3263.122 | 2796.84  | 2026.771 | 2246.066 | 2160.706 |
| 20108 | LOC103228 | 29.2993  | -0.49857 | 0.493025 | -1.01124 | 0.311903 | 0.412361 | 41.74065 | 26.27577 | 34.09084 | 26.78552 | 27.80844 | 19.09461 |
| 5564  | SLC47A1   | 1334.386 | -0.49858 | 0.113621 | -4.38805 | 1.14E-05 | 5.46E-05 | 1691.852 | 1465.421 | 1534.088 | 1104.903 | 1050.303 | 1159.746 |
| 9518  | CEP83     | 708.6127 | -0.49863 | 0.167341 | -2.9797  | 0.002885 | 0.008059 | 772.4731 | 1023.113 | 692.2527 | 564.7281 | 635.3159 | 563.7935 |
| 5811  | ABCB1     | 12710.79 | -0.49888 | 0.116897 | -4.26772 | 1.97E-05 | 9.03E-05 | 13895.3  | 17393.46 | 13375.44 | 10461.98 | 9934.03  | 11204.52 |
| 4773  | TXNL4A    | 2293.612 | -0.49896 | 0.103336 | -4.82848 | 1.38E-06 | 7.66E-06 | 2839.448 | 2442.552 | 2778.055 | 1872.755 | 1912.365 | 1916.496 |
| 24604 | RHOXF1    | 2.591447 | -0.499   | 1.581063 | -0.31561 | 0.752298 | 0.8129   | 2.710432 | 2.189647 | 4.174388 | 4.464254 | 0        | 2.009959 |
| 5530  | CNOT6L    | 2082.094 | -0.49901 | 0.113406 | -4.40026 | 1.08E-05 | 5.20E-05 | 2356.449 | 2633.051 | 2331.396 | 1535.703 | 1796.853 | 1839.112 |
| 16916 | LOC103244 | 63.14085 | -0.49925 | 0.332004 | -1.50375 | 0.132646 | 0.208466 | 67.21871 | 81.56436 | 72.35606 | 60.26743 | 49.19955 | 48.23901 |
| 5434  | POMT2     | 1308.334 | -0.49936 | 0.112342 | -4.44502 | 8.79E-06 |          |          |          |          |          |          |          |



|       |           |          |          |          |          |          |          |          |          |          |          |          |          |
|-------|-----------|----------|----------|----------|----------|----------|----------|----------|----------|----------|----------|----------|----------|
| 23787 | CHST1     | 5.512645 | -0.49992 | 1.140389 | -0.43837 | 0.661115 | 0.73888  | 5.420864 | 7.116354 | 6.957314 | 0        | 8.556443 | 5.024897 |
| 6821  | BNIP1     | 992.1363 | -0.49993 | 0.131229 | -3.8096  | 0.000139 | 0.000542 | 1234.331 | 1000.669 | 1250.925 | 834.8155 | 832.114  | 799.9637 |
| 20485 | LOC119621 | 30.43887 | -0.5     | 0.526608 | -0.94948 | 0.342376 | 0.444328 | 31.9831  | 40.50847 | 32.69937 | 29.01765 | 36.36488 | 12.05975 |
| 4248  | MRRF      | 2334.602 | -0.50005 | 0.096378 | -5.18844 | 2.12E-07 | 1.33E-06 | 2801.502 | 2702.572 | 2707.786 | 1881.683 | 1858.887 | 2055.183 |
| 3484  | ZNF655    | 8032.171 | -0.50019 | 0.085176 | -5.87236 | 4.30E-09 | 3.28E-08 | 9766.77  | 9301.074 | 9169.044 | 6339.241 | 6731.781 | 6885.114 |
| 5335  | PLCD3     | 6189.758 | -0.50022 | 0.111196 | -4.49853 | 6.84E-06 | 3.41E-05 | 7665.643 | 6714.553 | 7385.884 | 5031.214 | 4577.697 | 5763.557 |
| 5134  | CENPU     | 1401.953 | -0.50024 | 0.108537 | -4.60894 | 4.05E-06 | 2.10E-05 | 1707.572 | 1526.184 | 1693.41  | 1209.813 | 1123.033 | 1151.706 |
| 5232  | USP13     | 1764.659 | -0.50047 | 0.109678 | -4.56305 | 5.04E-06 | 2.56E-05 | 2019.272 | 2255.884 | 1931.35  | 1399.544 | 1450.317 | 1531.589 |
| 8495  | WDR83     | 432.6138 | -0.50053 | 0.153662 | -3.25733 | 0.001125 | 0.00352  | 533.413  | 488.2913 | 503.7095 | 325.8905 | 344.3968 | 399.9818 |
| 7284  | SCLY      | 657.6411 | -0.50065 | 0.137595 | -3.63855 | 0.000274 | 0.001001 | 806.0824 | 776.7774 | 733.3009 | 553.5675 | 479.1608 | 596.9578 |
| 6634  | KDSR      | 1196.362 | -0.50076 | 0.128855 | -3.88625 | 0.000102 | 0.000408 | 1486.943 | 1317.62  | 1408.856 | 964.2789 | 874.8963 | 1125.577 |
| 5746  | LOC103221 | 1503.464 | -0.50097 | 0.11648  | -4.30092 | 1.70E-05 | 7.87E-05 | 1888.087 | 1593.516 | 1807.51  | 1270.08  | 1155.12  | 1306.473 |
| 5638  | CACTIN    | 1374.404 | -0.50102 | 0.115019 | -4.35592 | 1.33E-05 | 6.25E-05 | 1636.017 | 1574.904 | 1627.316 | 1156.242 | 1011.799 | 1240.145 |
| 15611 | NEXN      | 167.8014 | -0.50104 | 0.290094 | -1.72718 | 0.084136 | 0.143097 | 150.7    | 285.749  | 152.3652 | 140.624  | 149.7377 | 127.6324 |
| 7221  | SNAPC2    | 1210.505 | -0.50117 | 0.136904 | -3.66072 | 0.000252 | 0.000926 | 1493.448 | 1222.918 | 1545.219 | 995.5286 | 898.4265 | 1107.487 |
| 22176 | LOC103221 | 13.6641  | -0.50117 | 0.720923 | -0.69518 | 0.48694  | 0.583726 | 16.80468 | 15.32753 | 15.30609 | 20.08914 | 6.417332 | 8.039836 |
| 10256 | LOC119621 | 311.2464 | -0.50126 | 0.178999 | -2.80033 | 0.005105 | 0.013233 | 400.0597 | 354.7229 | 337.4297 | 236.6055 | 299.4755 | 239.1851 |
| 7427  | MFS11     | 715.3674 | -0.50135 | 0.139648 | -3.59011 | 0.000331 | 0.001183 | 909.0788 | 741.743  | 867.577  | 598.21   | 545.4732 | 630.1221 |
| 5891  | ASCC2     | 1343.538 | -0.50148 | 0.118842 | -4.21975 | 2.45E-05 | 0.00011  | 1523.263 | 1715.041 | 1491.648 | 1066.957 | 1050.303 | 1214.015 |
| 13242 | LOC119621 | 143.8561 | -0.50152 | 0.232341 | -2.15855 | 0.030885 | 0.062006 | 184.3094 | 157.6546 | 164.1926 | 131.6955 | 102.6773 | 122.6075 |
| 25628 | LOC103221 | 0.820339 | -0.50157 | 3.43929  | -0.14584 | 0.884052 | 0.917064 | 0        | 0        | 2.782925 | 0        | 2.139111 | 0        |
| 14776 | LOC103221 | 142.0582 | -0.50162 | 0.267182 | -1.87746 | 0.060456 | 0.108775 | 210.3295 | 153.2753 | 133.5804 | 129.4634 | 126.2075 | 99.49297 |
| 6472  | COQ4      | 1157.54  | -0.50175 | 0.126997 | -3.95089 | 7.79E-05 | 0.00032  | 1479.896 | 1225.108 | 1369.895 | 968.7431 | 868.4789 | 1033.119 |
| 7107  | COX10     | 1167.398 | -0.50193 | 0.135865 | -3.69433 | 0.00022  | 0.000825 | 1220.236 | 1605.559 | 1278.754 | 939.7255 | 1005.382 | 954.7305 |
| 11568 | LOC119621 | 278.6928 | -0.50206 | 0.200696 | -2.50159 | 0.012364 | 0.028414 | 375.1238 | 271.5163 | 333.2553 | 200.8914 | 265.2497 | 226.1204 |
| 6069  | EPB41L5   | 1536.704 | -0.50207 | 0.121354 | -4.13726 | 3.51E-05 | 0.000154 | 1708.656 | 2020.497 | 1679.496 | 1254.455 | 1189.346 | 1367.777 |
| 11809 | LOC103241 | 395.2025 | -0.50214 | 0.205165 | -2.44751 | 0.014385 | 0.032384 | 583.827  | 358.5547 | 448.051  | 283.4801 | 363.6488 | 333.6532 |
| 5612  | ZFP62     | 2968.38  | -0.50224 | 0.11502  | -4.36649 | 1.26E-05 | 5.98E-05 | 3279.623 | 3964.904 | 3198.973 | 2390.608 | 2372.274 | 2603.902 |
| 8183  | FKBP11    | 711.3308 | -0.50232 | 0.149887 | -3.35134 | 0.000804 | 0.002612 | 890.1058 | 702.8768 | 912.7996 | 564.7281 | 558.3079 | 639.1669 |
| 8731  | AKAP9     | 12796.1  | -0.50251 | 0.15737  | -3.19316 | 0.001407 | 0.004285 | 12798.66 | 19850.79 | 12358.28 | 10408.41 | 10430.3  | 10930.16 |
| 6907  | RFK       | 795.6836 | -0.50289 | 0.133237 | -3.77438 | 0.00016  | 0.000617 | 953.5299 | 862.721  | 977.5026 | 667.406  | 723.0194 | 589.9229 |
| 4746  | RPAIN     | 1234.203 | -0.50314 | 0.103813 | -4.84654 | 1.26E-06 | 7.04E-06 | 1430.024 | 1454.473 | 1454.774 | 1029.011 | 1046.025 | 990.9098 |
| 6905  | H2AFY2    | 650.4136 | -0.50335 | 0.13333  | -3.77522 | 0.00016  | 0.000615 | 771.3889 | 801.9583 | 718.6905 | 529.0141 | 500.5519 | 580.8781 |
| 15233 | LOC103211 | 160.2949 | -0.50338 | 0.281264 | -1.7897  | 0.073503 | 0.128286 | 142.0266 | 252.3568 | 168.367  | 165.1774 | 111.2338 | 162.6075 |
| 6523  | KIF15     | 2176.159 | -0.50344 | 0.128087 | -3.93042 | 8.48E-05 | 0.000346 | 2374.338 | 3002.006 | 2282.695 | 1758.916 | 1730.541 | 1908.456 |
| 8627  | SEPTIN6   | 1069.843 | -0.50381 | 0.156434 | -3.2206  | 0.001279 | 0.003942 | 1131.876 | 1561.218 | 1072.122 | 883.9223 | 851.366  | 918.5512 |
| 7765  | LGALS1    | 36745.51 | -0.50417 | 0.145124 | -3.47409 | 0.000513 | 0.001755 | 49642.1  | 32294.56 | 47371.65 | 30269.87 | 28398.83 | 32496.01 |
| 7356  | MAP4K5    | 3248.934 | -0.50424 | 0.139492 | -3.61486 | 0.000301 | 0.001086 | 3398.339 | 4728.543 | 3306.115 | 2660.695 | 2682.445 | 2717.464 |
| 5850  | CREB1     | 4391     | -0.50444 | 0.118764 | -4.24739 | 2.16E-05 | 9.83E-05 | 4761.687 | 6029.741 | 4662.792 | 3479.886 | 3681.409 | 3730.484 |
| 13354 | LOC119618 | 159.0737 | -0.50446 | 0.236185 | -2.13588 | 0.032689 | 0.065077 | 215.2083 | 160.9391 | 181.5859 | 151.7846 | 128.3466 | 116.5776 |
| 19280 | LOC103211 | 34.98662 | -0.50475 | 0.443097 | -1.13915 | 0.25464  | 0.351103 | 48.24569 | 33.39212 | 41.04815 | 29.01765 | 32.08666 | 26.12947 |
| 18056 | LOC103241 | 49.39862 | -0.5048  | 0.378659 | -1.33314 | 0.182486 | 0.268686 | 52.58238 | 63.49977 | 56.35424 | 46.87467 | 44.92132 | 32.15934 |
| 22929 | LOC103231 | 8.86212  | -0.50486 | 0.878842 | -0.57446 | 0.565654 | 0.655846 | 10.29964 | 10.40082 | 9.740239 | 11.16063 | 8.556443 | 3.014938 |
| 17825 | LOC119621 | 49.23951 | -0.50496 | 0.367753 | -1.3731  | 0.169721 | 0.253129 | 54.20864 | 55.28859 | 64.00729 | 37.94616 | 42.78221 | 41.20416 |
| 4374  | ABL1      | 8662.275 | -0.50498 | 0.099064 | -5.09756 | 3.44E-07 | 2.09E-06 | 10178.21 | 10465.42 | 9855.035 | 7049.057 | 6515.731 | 7910.193 |
| 9769  | ABT1      | 383.0572 | -0.505   | 0.173467 | -2.91119 | 0.003601 | 0.009798 | 490.5882 | 397.421  | 464.7486 | 303.5693 | 280.2235 | 361.7926 |
| 4383  | GNPDA2    | 2045.517 | -0.505   | 0.099182 | -5.09166 | 3.55E-07 | 2.15E-06 | 2360.786 | 2446.931 | 2390.533 | 1602.667 | 1813.966 | 1658.216 |
| 22895 | LOC119621 | 8.509938 | -0.50527 | 0.871083 | -0.58005 | 0.561883 | 0.652442 | 7.047123 | 13.6853  | 9.044508 | 6.696381 | 8.556443 | 6.029877 |
| 6817  | CYB5R4    | 648.2312 | -0.50534 | 0.132621 | -3.81038 | 0.000139 | 0.000541 | 773.5572 | 716.0147 | 788.2636 | 549.1032 | 569.0034 | 493.4449 |
| 6684  | LOC119621 | 767.8992 | -0.50537 | 0.130808 | -3.86344 | 0.000112 | 0.000445 | 928.0519 | 914.7251 | 866.1856 | 569.1924 | 626.7594 | 702.4806 |
| 21630 | LOC119621 | 15.70467 | -0.50541 | 0.64391  | -0.78491 | 0.432506 | 0.531585 | 18.43094 | 18.06459 | 18.08902 | 15.62489 | 14.97377 | 9.044815 |
| 6016  | FLRT3     | 11880.92 | -0.50572 | 0.121621 | -4.15815 | 3.21E-05 | 0.000142 | 12733.07 | 16612.31 | 12484.2  | 9593.682 | 9501.93  | 10360.33 |
| 4872  | TTC12     | 1637.812 | -0.5058  | 0.106294 | -4.75848 | 1.95E-06 | 1.06E-05 | 1918.986 | 1996.958 | 1856.211 | 1267.848 | 1332.666 | 1454.205 |
| 3769  | NAB1      | 2941.482 | -0.50583 | 0.09075  | -5.57388 | 2.49E-08 | 1.76E-07 | 3584.817 | 3431.725 | 3339.511 | 2482.125 | 2361.578 | 2449.135 |
| 19112 | LOC103231 | 39.17153 | -0.50646 | 0.433911 | -1.1672  | 0.243129 | 0.338195 | 55.29281 | 38.86624 | 42.43961 | 37.94616 | 36.36488 | 24.11951 |
| 15440 | LOC103211 | 215.9566 | -0.50653 | 0.288775 | -1.75405 | 0.079422 | 0.13675  | 169.673  | 359.1022 | 228.8956 | 214.2842 | 186.1026 | 137.6822 |
| 13519 | LOC103241 | 163.1306 | -0.5066  | 0.240785 | -2.10394 | 0.035384 | 0.069582 | 218.4608 | 160.3917 | 197.5877 | 107.1421 | 145.4595 | 149.7419 |
| 5207  | SLC35A5   | 1174.254 | -0.50674 | 0.110778 | -4.57438 | 4.78E-06 | 2.44E-05 | 1431.65  | 1282.586 | 1421.379 | 979.9037 | 956.1825 | 973.8251 |
| 20599 | LOC103231 | 22.79447 | -0.5069  | 0.540952 | -0.93704 | 0.348736 | 0.450077 | 24.93597 | 26.82318 | 28.52499 | 24.5534  | 12.83466 | 19.09461 |
| 7635  | SMC6      | 5138.707 | -0.50704 | 0.144293 | -3.51392 | 0.000442 | 0.001537 | 5334.672 | 7643.511 | 5119.191 | 4176.31  | 4280.36  | 4278.198 |
| 20202 | LOC119621 | 27.21883 | -0.50715 | 0.508974 | -0.99642 | 0.319044 | 0.419849 | 31.44101 | 31.74989 | 34.09084 | 15.62489 | 19.252   | 31.15436 |
| 23475 | CUNH12or  | 6.070078 | -0.50719 | 1.038947 | -0.48817 | 0.625427 | 0.708284 | 8.131296 | 4.379295 | 9.044508 | 6.696381 | 2.139111 | 6.029877 |
| 4042  | CAPZA1    | 11386.67 | -0.50725 | 0.094994 | -5.33979 | 9.31E-08 | 6.12E-07 | 12472.32 | 14758.77 | 12871.73 | 9432.969 | 9474.121 | 9310.13  |
| 4033  | HINT1     | 11352.03 | -0.50738 | 0.094894 | -5.34685 | 8.95E-08 | 5.90E-07 | 13283.83 | 12575.14 | 14117.09 | 9961.983 | 9506.208 | 8667.948 |
| 25612 | LOC103231 | 0.828189 | -0.50755 | 3.415191 | -0.14861 | 0.881857 | 0.915359 | 0        | 2.737059 | 0        | 2.232127 | 0        | 0        |
| 7543  | GSP1T     | 7414.619 | -0.50779 | 0.143218 | -3.54558 | 0.000392 | 0.001381 | 7530.122 | 11043.49 | 7545.902 | 6006.654 | 6047.266 | 6314.286 |
| 5988  | CDK17     | 1864.129 | -0.5082  | 0.121885 | -4.1695  | 3.05E-05 | 0.000136 | 2103.295 | 2484.155 | 1984.226 | 1479.9   | 1475.986 | 1657.211 |
| 23265 | TRNAK-UU  | 6.922235 | -0.50837 | 0.977528 | -0.52006 | 0.603025 | 0.689078 | 12.46799 | 6.02153  | 6.261582 | 4.464254 | 4.278221 | 8.039836 |
| 21270 | LOC119621 | 17.65779 | -0.50845 | 0.605462 | -0.83976 | 0.401041 | 0.501254 | 24.39389 | 18.06459 | 20.17621 | 13.39276 | 12.83466 | 17.08465 |
| 9886  | ZNF792    | 276.0825 | -0.5087  | 0.176222 | -2.88672 | 0.003893 | 0.010468 | 325.7939 | 338.3005 | 310.9919 | 200.8914 | 235.3022 | 245.215  |
| 24518 | TRNAL-UA  | 3.515751 | -0.50872 | 1.550436 | -0.32812 | 0.742824 | 0.805448 | 2.710432 | 5.474118 |          |          |          |          |



|       |           |          |          |          |          |          |          |          |          |          |          |          |          |
|-------|-----------|----------|----------|----------|----------|----------|----------|----------|----------|----------|----------|----------|----------|
| 4334  | DRG1      | 2984.211 | -0.50908 | 0.099248 | -5.12939 | 2.91E-07 | 1.78E-06 | 3711.123 | 3202.907 | 3601.801 | 2441.947 | 2496.342 | 2451.145 |
| 17998 | PDE1A     | 47.2004  | -0.50911 | 0.379129 | -1.34284 | 0.179324 | 0.264881 | 49.87195 | 61.31012 | 54.96278 | 44.64254 | 34.22577 | 38.18922 |
| 16540 | LOC119621 | 84.47138 | -0.50925 | 0.324713 | -1.5683  | 0.116812 | 0.187765 | 119.8011 | 69.5213  | 107.8384 | 75.89232 | 68.45154 | 65.32367 |
| 25014 | OSM       | 1.701397 | -0.50931 | 2.094984 | -0.24311 | 0.80792  | 0.858662 | 2.710432 | 1.642235 | 1.391463 | 4.464254 | 0        | 0        |
| 9190  | LOC103231 | 308.6991 | -0.50941 | 0.166588 | -3.05793 | 0.002229 | 0.006447 | 375.1238 | 367.3133 | 347.8657 | 252.2303 | 235.3022 | 274.3594 |
| 3948  | UGGT2     | 4964.065 | -0.50972 | 0.094224 | -5.4097  | 6.31E-08 | 4.25E-07 | 5689.196 | 6314.395 | 5492.103 | 4176.31  | 3997.998 | 4114.386 |
| 17359 | LOC119621 | 88.49966 | -0.50982 | 0.354596 | -1.43775 | 0.150504 | 0.230494 | 132.8112 | 60.76271 | 118.9701 | 75.89232 | 64.17332 | 78.3884  |
| 3072  | ABCE1     | 9049.438 | -0.50999 | 0.080847 | -6.30809 | 2.82E-10 | 2.44E-09 | 10535.45 | 11034.18 | 10326.05 | 7569.143 | 7429.131 | 7402.679 |
| 24972 | LOC119621 | 1.663837 | -0.51001 | 2.028938 | -0.25137 | 0.801531 | 0.853303 | 1.084173 | 3.831883 | 0.695731 | 2.232127 | 2.139111 | 0        |
| 18049 | MKI67     | 11964.76 | -0.51038 | 0.382411 | -1.33463 | 0.181996 | 0.268054 | 9967.342 | 21378.62 | 10832.54 | 9307.97  | 9512.625 | 10789.46 |
| 20407 | LOC103211 | 24.03595 | -0.51038 | 0.531613 | -0.96006 | 0.337025 | 0.439055 | 24.93597 | 32.2973  | 27.13352 | 26.78552 | 14.97377 | 18.08963 |
| 9516  | LOC103211 | 353.4622 | -0.51042 | 0.171294 | -2.97981 | 0.002884 | 0.008058 | 462.3997 | 399.6106 | 385.4352 | 252.2303 | 316.5884 | 304.5088 |
| 4197  | HSP90AB1  | 73950.13 | -0.51049 | 0.097794 | -5.22004 | 1.79E-07 | 1.13E-06 | 86821.1  | 93252.7  | 80630.4  | 59189.31 | 57373.09 | 66434.17 |
| 4905  | GADD45B   | 1154.835 | -0.51072 | 0.10773  | -4.74073 | 2.13E-06 | 1.15E-05 | 1355.216 | 1390.973 | 1328.847 | 930.797  | 926.2349 | 996.9396 |
| 23481 | TRNAP-UG  | 6.06577  | -0.51079 | 1.047825 | -0.48748 | 0.625919 | 0.708661 | 5.96295  | 3.831883 | 11.82743 | 4.464254 | 4.278221 | 6.029877 |
| 5733  | KIF2A     | 4280.937 | -0.51086 | 0.118589 | -4.3078  | 1.65E-05 | 7.65E-05 | 4655.98  | 5831.031 | 4610.612 | 3415.154 | 3384.073 | 3788.773 |
| 7038  | ZFHX3     | 2307.962 | -0.51103 | 0.137478 | -3.71716 | 0.000201 | 0.000761 | 2379.217 | 3287.755 | 2473.325 | 1872.755 | 1809.688 | 2025.034 |
| 22780 | LOC119621 | 12.78829 | -0.51111 | 0.857863 | -0.5958  | 0.551309 | 0.643395 | 14.63633 | 20.25424 | 9.044508 | 20.08914 | 10.69555 | 2.009959 |
| 5481  | TRIM23    | 1153.242 | -0.51131 | 0.115742 | -4.41763 | 9.98E-06 | 4.84E-05 | 1477.185 | 1284.776 | 1305.192 | 970.9752 | 915.5394 | 965.7853 |
| 6861  | EIPR1     | 1826.139 | -0.51137 | 0.134837 | -3.7925  | 0.000149 | 0.000578 | 2348.86  | 1892.403 | 2204.077 | 1549.096 | 1277.049 | 1685.351 |
| 12647 | LOC103241 | 391.4993 | -0.51143 | 0.225161 | -2.2714  | 0.023123 | 0.048606 | 572.9853 | 333.3738 | 471.7059 | 292.4086 | 402.1528 | 276.3694 |
| 5477  | SUPT20H   | 2059.425 | -0.51144 | 0.115605 | -4.42404 | 9.69E-06 | 4.70E-05 | 2239.901 | 2746.365 | 2277.825 | 1660.702 | 1677.063 | 1754.694 |
| 24777 | LOC103231 | 2.15836  | -0.5116  | 1.790298 | -0.28576 | 0.775062 | 0.831574 | 1.626259 | 5.474118 | 0.695731 | 0        | 2.139111 | 3.014938 |
| 22563 | LOC103241 | 9.855944 | -0.51161 | 0.811175 | -0.6307  | 0.528239 | 0.622401 | 14.09425 | 10.40082 | 10.43597 | 4.464254 | 10.69555 | 9.044815 |
| 4540  | UBE2W     | 2099.537 | -0.51171 | 0.102657 | -4.98466 | 6.21E-07 | 3.63E-06 | 2547.806 | 2470.47  | 2387.054 | 1837.041 | 1585.081 | 1769.769 |
| 5004  | STK24     | 5222.186 | -0.51176 | 0.109213 | -4.68586 | 2.79E-06 | 1.48E-05 | 5877.843 | 7000.85  | 5538.022 | 4323.63  | 4231.161 | 4361.611 |
| 5870  | ELF4      | 3067.198 | -0.51193 | 0.12102  | -4.23013 | 2.34E-05 | 0.000106 | 3235.714 | 4124.201 | 3462.655 | 2482.125 | 2350.883 | 2747.614 |
| 4568  | POP5      | 2344.832 | -0.51197 | 0.10321  | -4.96048 | 7.03E-07 | 4.09E-06 | 2857.879 | 2510.431 | 2900.504 | 1991.057 | 1901.669 | 1907.451 |
| 3615  | DNAJC10   | 16080.52 | -0.51211 | 0.089484 | -5.72296 | 1.05E-08 | 7.70E-08 | 18440.69 | 20348.39 | 17930.39 | 12899.46 | 13050.71 | 13813.44 |
| 16266 | CUNH13orf | 74.32571 | -0.51214 | 0.317231 | -1.61442 | 0.106437 | 0.173959 | 96.49137 | 70.06871 | 96.01093 | 58.0353  | 62.03421 | 63.31371 |
| 9809  | BRD3OS    | 841.5762 | -0.51221 | 0.17643  | -2.90317 | 0.003694 | 0.010012 | 1168.196 | 757.0705 | 1047.771 | 622.7634 | 656.707  | 796.9487 |
| 6017  | SREK1     | 8535.903 | -0.51222 | 0.123188 | -4.15802 | 3.21E-05 | 0.000142 | 9143.913 | 12046.34 | 8916.493 | 6881.647 | 7099.708 | 7127.314 |
| 4621  | CSDE1     | 29635.89 | -0.51225 | 0.103787 | -4.93563 | 7.99E-07 | 4.60E-06 | 33079.74 | 39549.41 | 31902.07 | 23870.37 | 23934.51 | 25479.24 |
| 23147 | LOC103221 | 7.187218 | -0.51239 | 0.953832 | -0.53719 | 0.591138 | 0.67891  | 6.505036 | 9.306001 | 9.044508 | 6.696381 | 8.556443 | 3.014938 |
| 5302  | KATNBL1   | 1547.198 | -0.51244 | 0.113478 | -4.51575 | 6.31E-06 | 3.16E-05 | 1862.067 | 1682.744 | 1907     | 1299.098 | 1360.474 | 1171.806 |
| 9232  | LOC119621 | 444.2113 | -0.51251 | 0.168219 | -3.04669 | 0.002314 | 0.006662 | 493.8407 | 600.5108 | 475.1845 | 314.7299 | 385.0399 | 395.9619 |
| 25453 | LOC103221 | 0.825535 | -0.51254 | 2.993798 | -0.1712  | 0.864066 | 0.902443 | 1.626259 | 1.094824 | 0        | 2.232127 | 0        | 0        |
| 6240  | EFEMP1    | 4834.591 | -0.51258 | 0.126407 | -4.05502 | 5.01E-05 | 0.000214 | 5119.464 | 6818.014 | 5116.408 | 3805.777 | 4119.927 | 4027.958 |
| 9042  | SDF2      | 2378.523 | -0.51291 | 0.165407 | -3.10088 | 0.001929 | 0.005673 | 3198.852 | 1994.769 | 3199.669 | 1935.254 | 1865.305 | 2077.293 |
| 15004 | LOC119621 | 133.5997 | -0.51299 | 0.279928 | -1.83259 | 0.066864 | 0.118474 | 175.0939 | 109.4824 | 185.7603 | 120.5349 | 111.2338 | 99.49297 |
| 4253  | DYNC2H1   | 6686.852 | -0.51301 | 0.0989   | -5.18714 | 2.14E-07 | 1.33E-06 | 7582.704 | 8610.24  | 7402.582 | 5363.801 | 5317.829 | 5843.956 |
| 24282 | LOC103231 | 4.303194 | -0.51301 | 1.406552 | -0.36473 | 0.715312 | 0.783155 | 1.084173 | 10.94824 | 3.478657 | 0        | 4.278221 | 6.029877 |
| 6443  | PRKAR1A   | 18746.22 | -0.51318 | 0.129486 | -3.96317 | 7.40E-05 | 0.000305 | 19845.78 | 27056.38 | 19235.58 | 15321.32 | 15123.51 | 15894.76 |
| 22726 | MATN1     | 9.004888 | -0.51319 | 0.848998 | -0.60446 | 0.545538 | 0.638174 | 9.215468 | 14.78012 | 7.653045 | 8.928508 | 6.417332 | 7.034856 |
| 5755  | TRMT61B   | 1680.41  | -0.51325 | 0.119449 | -4.29678 | 1.73E-05 | 8.00E-05 | 2161.84  | 1725.442 | 2044.059 | 1345.973 | 1369.031 | 1436.116 |
| 4876  | COPS7B    | 1364.881 | -0.5137  | 0.108035 | -4.75497 | 1.98E-06 | 1.08E-05 | 1572.05  | 1595.158 | 1655.145 | 1064.725 | 1095.225 | 1206.98  |
| 9256  | DUS4L     | 281.9355 | -0.51377 | 0.168924 | -3.04141 | 0.002355 | 0.006763 | 337.7198 | 315.3092 | 342.2998 | 234.3733 | 226.7457 | 235.1652 |
| 9413  | GCDH      | 577.58   | -0.51396 | 0.171076 | -3.0043  | 0.002662 | 0.007518 | 772.4731 | 543.5799 | 724.9521 | 484.3716 | 423.5439 | 516.5594 |
| 10839 | UQCERQ    | 4146.115 | -0.51399 | 0.19304  | -2.66259 | 0.007754 | 0.019017 | 5853.449 | 3011.312 | 5766.222 | 3412.922 | 3461.081 | 3371.706 |
| 10565 | TMEM53    | 287.0246 | -0.51411 | 0.18835  | -2.72954 | 0.006342 | 0.015959 | 346.9353 | 341.585  | 329.0809 | 189.7308 | 237.4413 | 277.3743 |
| 3624  | GART      | 9581.302 | -0.5143  | 0.089968 | -5.71645 | 1.09E-08 | 7.98E-08 | 11081.33 | 11951.64 | 10786.62 | 7805.748 | 7538.226 | 8324.245 |
| 5739  | CUNH5orf  | 1004.599 | -0.51444 | 0.119474 | -4.30584 | 1.66E-05 | 7.71E-05 | 1161.691 | 1282.038 | 1104.126 | 801.3336 | 817.1403 | 861.2674 |
| 5144  | MANBAL    | 1703.477 | -0.51455 | 0.111708 | -4.60619 | 4.10E-06 | 2.12E-05 | 1894.592 | 2218.66  | 1900.042 | 1350.437 | 1431.065 | 1426.066 |
| 18681 | LOC119621 | 109.4802 | -0.51456 | 0.417912 | -1.23126 | 0.218224 | 0.310522 | 165.8784 | 47.62483 | 172.5414 | 107.1421 | 81.28621 | 82.40832 |
| 4959  | MRPS7     | 2755.985 | -0.51474 | 0.10929  | -4.70986 | 2.48E-06 | 1.33E-05 | 3398.339 | 2865.153 | 3461.264 | 2341.501 | 2288.848 | 2180.805 |
| 5449  | LACTB     | 1235.262 | -0.51501 | 0.115968 | -4.44098 | 8.96E-06 | 4.37E-05 | 1419.724 | 1571.619 | 1373.374 | 973.2074 | 988.2691 | 1085.378 |
| 7868  | EXOSC7    | 886.49   | -0.51507 | 0.149302 | -3.44987 | 0.000561 | 0.001895 | 1201.805 | 880.2382 | 1051.25  | 707.5843 | 678.0981 | 799.9637 |
| 5065  | MSL1      | 4040.429 | -0.5152  | 0.110732 | -4.65267 | 3.28E-06 | 1.72E-05 | 4554.068 | 5299.494 | 4415.807 | 3133.906 | 3219.362 | 3619.936 |
| 3732  | TSN       | 5062.087 | -0.51527 | 0.091843 | -5.61028 | 2.02E-08 | 1.44E-07 | 6146.717 | 5571.557 | 6148.178 | 4359.344 | 4100.675 | 4046.047 |
| 5220  | PADI1     | 1157.731 | -0.51537 | 0.112781 | -4.56966 | 4.89E-06 | 2.49E-05 | 1435.445 | 1273.827 | 1381.027 | 924.1006 | 939.0696 | 992.9197 |
| 6970  | SMARCA5   | 16134.21 | -0.5156  | 0.137554 | -3.74833 | 0.000178 | 0.000679 | 16639.34 | 23821.17 | 16501.36 | 13272.23 | 12875.31 | 13695.86 |
| 18071 | LOC119621 | 47.46942 | -0.51563 | 0.387976 | -1.32903 | 0.183837 | 0.27045  | 65.05036 | 48.71965 | 52.87558 | 37.94616 | 47.06043 | 33.16432 |
| 20215 | LOC119611 | 25.50436 | -0.5159  | 0.518871 | -0.99427 | 0.320092 | 0.420956 | 23.30971 | 33.39212 | 34.09084 | 17.85702 | 19.252   | 25.12449 |
| 16863 | LOC103221 | 85.91    | -0.51604 | 0.341086 | -1.51293 | 0.130298 | 0.205419 | 121.4273 | 70.61612 | 112.0128 | 84.82083 | 49.19955 | 77.38342 |
| 20622 | LOC119621 | 22.34568 | -0.51629 | 0.553387 | -0.93297 | 0.350836 | 0.452283 | 26.56223 | 19.70683 | 32.69937 | 15.62489 | 21.39111 | 18.08963 |
| 7771  | FAM216A   | 763.7612 | -0.51643 | 0.148751 | -3.47175 | 0.000517 | 0.001769 | 820.1767 | 968.9189 | 900.9721 | 667.406  | 699.4892 | 525.6043 |
| 9095  | FBXL7     | 1125.388 | -0.51644 | 0.167413 | -3.08485 | 0.002037 | 0.005953 | 1104.772 | 1688.765 | 1183.439 | 892.8508 | 868.4789 | 1014.024 |
| 7102  | VPS33A    | 742.8473 | -0.51658 | 0.139797 | -3.69521 | 0.00022  | 0.000822 | 858.6648 | 953.044  | 817.4844 | 575.8888 | 562.5861 | 689.4159 |
| 5597  | TMEM1611  | 1065.916 | -0.51701 | 0.11818  | -4.37473 | 1.22E-05 | 5.78E-05 | 1259.267 | 1329.116 | 1171.612 | 883.9223 | 930.5131 | 821.0682 |
| 24080 | TRNAA-UG  | 4.271385 | -0.51705 | 1.31559  | -0.39302 | 0.694304 | 0.766481 | 8.131296 | 2.189647 | 4.87012  | 0        | 6.417332 | 4.019918 |
| 9826  | LOC119621 | 630.2213 | -0.51706 |          |          |          |          |          |          |          |          |          |          |



|       |           |          |          |          |          |          |          |          |          |          |          |          |          |
|-------|-----------|----------|----------|----------|----------|----------|----------|----------|----------|----------|----------|----------|----------|
| 5933  | EIF2AK1   | 1053.767 | -0.51719 | 0.123336 | -4.19337 | 2.75E-05 | 0.000123 | 1228.91  | 1301.745 | 1197.354 | 767.8517 | 877.0354 | 949.7056 |
| 5077  | DLGAP5    | 4325.902 | -0.51738 | 0.111139 | -4.64476 | 3.40E-06 | 1.78E-05 | 4860.888 | 5828.294 | 4591.131 | 3486.582 | 3593.706 | 3594.812 |
| 21229 | LOC103215 | 22.87398 | -0.51756 | 0.611113 | -0.84688 | 0.39706  | 0.497237 | 36.86187 | 14.23271 | 30.61218 | 11.16063 | 19.252   | 25.12449 |
| 19792 | TMEM238   | 40.76187 | -0.51759 | 0.490855 | -1.05446 | 0.291673 | 0.391781 | 55.8349  | 35.03436 | 53.57132 | 49.10679 | 12.83466 | 38.18922 |
| 16594 | LOC103241 | 91.30043 | -0.51763 | 0.332192 | -1.55823 | 0.119178 | 0.190934 | 86.19173 | 145.6115 | 89.05362 | 73.66019 | 91.98176 | 61.30375 |
| 4280  | LOC119621 | 4534.965 | -0.51791 | 0.100228 | -5.16732 | 2.37E-07 | 1.48E-06 | 5353.103 | 5395.291 | 5281.993 | 3678.545 | 3390.49  | 4110.366 |
| 8583  | PSMG4     | 503.8083 | -0.51804 | 0.160197 | -3.2338  | 0.001222 | 0.003784 | 653.7562 | 499.787  | 624.7668 | 446.4254 | 402.1528 | 395.9619 |
| 22194 | LOC119621 | 12.31918 | -0.51837 | 0.748169 | -0.69285 | 0.488406 | 0.58502  | 15.7205  | 17.51718 | 9.740239 | 8.928508 | 14.97377 | 7.034856 |
| 25039 | LOC119611 | 1.276842 | -0.51848 | 2.167986 | -0.23915 | 0.810985 | 0.86099  | 1.084173 | 2.737059 | 0.695731 | 0        | 2.139111 | 1.004979 |
| 3960  | CAVIN1    | 29561.2  | -0.51857 | 0.095966 | -5.40365 | 6.53E-08 | 4.38E-07 | 34561.26 | 36961.25 | 32937.31 | 24412.77 | 22293.81 | 26200.82 |
| 18110 | LOC119621 | 51.87075 | -0.51857 | 0.393112 | -1.31914 | 0.187124 | 0.274693 | 61.25576 | 77.18507 | 44.52681 | 35.71403 | 51.33866 | 41.20416 |
| 3980  | RFC4      | 1881.645 | -0.51889 | 0.096294 | -5.38859 | 7.10E-08 | 4.74E-07 | 2262.126 | 2151.328 | 2238.168 | 1558.025 | 1497.377 | 1582.843 |
| 10417 | HNRNP3    | 4685.615 | -0.51889 | 0.187869 | -2.76199 | 0.005745 | 0.014662 | 3988.672 | 7759.562 | 4810.287 | 3749.973 | 3820.452 | 3984.744 |
| 19872 | LOC103215 | 25.79005 | -0.51896 | 0.496189 | -1.04589 | 0.295614 | 0.395012 | 30.35684 | 30.65506 | 29.91645 | 22.32127 | 21.39111 | 20.09959 |
| 4194  | LOC103241 | 1468.631 | -0.51896 | 0.099364 | -5.22282 | 1.76E-07 | 1.12E-06 | 1706.488 | 1768.688 | 1713.586 | 1209.813 | 1219.293 | 1193.916 |
| 4272  | GNPAT     | 3144.553 | -0.519   | 0.100262 | -5.1764  | 2.26E-07 | 1.41E-06 | 3961.567 | 3418.587 | 3736.773 | 2511.143 | 2534.846 | 2704.4   |
| 23968 | TRNAT-AG  | 3.943666 | -0.51916 | 1.260432 | -0.41189 | 0.680419 | 0.754712 | 5.96295  | 2.737059 | 5.565851 | 2.232127 | 2.139111 | 5.024897 |
| 10257 | SFR1      | 380.0839 | -0.51919 | 0.185415 | -2.80015 | 0.005108 | 0.013239 | 490.5882 | 361.8392 | 487.7077 | 325.8905 | 340.1186 | 274.3594 |
| 5082  | FAF2      | 5491.761 | -0.51935 | 0.111862 | -4.64277 | 3.44E-06 | 1.80E-05 | 6148.344 | 7390.607 | 5874.06  | 4341.487 | 4419.403 | 4776.667 |
| 9114  | CCDC30    | 517.355  | -0.51945 | 0.168683 | -3.07944 | 0.002074 | 0.006049 | 551.3018 | 727.5103 | 546.1491 | 437.4969 | 457.7697 | 383.9022 |
| 4558  | PPRC1     | 3164.532 | -0.5195  | 0.104579 | -4.96752 | 6.78E-07 | 3.96E-06 | 3650.952 | 4010.339 | 3530.141 | 2544.625 | 2432.169 | 2818.967 |
| 12589 | RHBDL1    | 176.5167 | -0.51963 | 0.227317 | -2.28593 | 0.022259 | 0.047005 | 215.7504 | 172.4347 | 237.2444 | 149.5525 | 128.3466 | 155.7718 |
| 3950  | ANKS6     | 2226.605 | -0.51994 | 0.096119 | -5.40933 | 6.33E-08 | 4.26E-07 | 2673.028 | 2559.698 | 2640.996 | 1841.505 | 1730.541 | 1911.471 |
| 10392 | TARBP2    | 882.424  | -0.52016 | 0.187944 | -2.76764 | 0.005646 | 0.014444 | 1252.762 | 782.7989 | 1088.82  | 709.8164 | 601.0901 | 859.2574 |
| 4739  | PTDSS1    | 1760.006 | -0.5202  | 0.107097 | -4.85728 | 1.19E-06 | 6.68E-06 | 2210.628 | 1966.851 | 2046.146 | 1506.686 | 1343.361 | 1486.365 |
| 8119  | LOC103215 | 764.3165 | -0.52023 | 0.154248 | -3.37272 | 0.000744 | 0.002437 | 1024.543 | 739.0059 | 941.3245 | 618.2992 | 590.3945 | 672.3313 |
| 23427 | LOC119621 | 8.315197 | -0.52025 | 1.050122 | -0.49542 | 0.620307 | 0.703895 | 14.63633 | 8.758589 | 6.957314 | 4.464254 | 0        | 15.07469 |
| 7905  | PPM1H     | 418.3193 | -0.52055 | 0.151469 | -3.43666 | 0.000589 | 0.001981 | 484.0831 | 535.9162 | 459.1827 | 350.4439 | 331.5622 | 348.7279 |
| 7374  | PGAM5     | 3615.614 | -0.52057 | 0.144262 | -3.60853 | 0.000308 | 0.00111  | 4873.899 | 3385.742 | 4528.515 | 2955.336 | 2641.802 | 3308.392 |
| 5482  | HDAC4     | 1034.195 | -0.52115 | 0.11798  | -4.41726 | 1.00E-05 | 4.85E-05 | 1212.647 | 1197.737 | 1253.012 | 828.1191 | 785.0536 | 928.601  |
| 19528 | LOC103241 | 31.21484 | -0.52125 | 0.475604 | -1.09598 | 0.273089 | 0.371778 | 30.89892 | 44.34036 | 36.17803 | 22.32127 | 21.39111 | 32.15934 |
| 6149  | CCDC14    | 4367.437 | -0.52131 | 0.127244 | -4.0969  | 4.19E-05 | 0.000181 | 4617.492 | 6196.702 | 4628.005 | 3676.313 | 3578.732 | 3507.378 |
| 6701  | PIGF      | 1458.337 | -0.52147 | 0.135305 | -3.85403 | 0.000116 | 0.000461 | 1858.272 | 1408.491 | 1890.302 | 1218.741 | 1189.346 | 1184.871 |
| 19393 | LOC119621 | 32.38622 | -0.52157 | 0.466339 | -1.11845 | 0.263377 | 0.361051 | 47.16151 | 31.20247 | 36.17803 | 31.24978 | 21.39111 | 27.13445 |
| 4769  | VPS25     | 2164.489 | -0.52166 | 0.107983 | -4.83094 | 1.36E-06 | 7.58E-06 | 2719.647 | 2426.129 | 2516.46  | 1694.184 | 1689.897 | 1940.615 |
| 8865  | LOC119621 | 316.4233 | -0.52204 | 0.165568 | -3.15303 | 0.001616 | 0.004846 | 391.9284 | 380.9986 | 345.7785 | 274.5516 | 245.9977 | 259.2847 |
| 4826  | G3BP2     | 15058.58 | -0.52207 | 0.108858 | -4.79584 | 1.62E-06 | 8.92E-06 | 16429.55 | 20527.4  | 16302.38 | 12490.98 | 12488.13 | 12113.02 |
| 4494  | NAA15     | 9502.676 | -0.52208 | 0.104136 | -5.01341 | 5.35E-07 | 3.16E-06 | 10596.16 | 12707.07 | 10308.65 | 7653.963 | 7792.78  | 7957.427 |
| 5210  | BICC1     | 41962.83 | -0.5222  | 0.114176 | -4.57364 | 4.79E-06 | 2.45E-05 | 45752.09 | 57692.83 | 44985.29 | 34187.26 | 32572.24 | 36587.28 |
| 5406  | RNF115    | 1175.379 | -0.52225 | 0.117085 | -4.46041 | 8.18E-06 | 4.02E-05 | 1361.721 | 1517.426 | 1279.45  | 944.1897 | 962.5998 | 986.8898 |
| 4198  | TUFM      | 11896.16 | -0.52227 | 0.100064 | -5.2193  | 1.80E-07 | 1.14E-06 | 13814.53 | 15214.22 | 13056.09 | 9758.859 | 9046.299 | 10486.96 |
| 8291  | LOC103241 | 482.296  | -0.52232 | 0.15751  | -3.31608 | 0.000913 | 0.002927 | 632.0727 | 516.2093 | 553.8022 | 399.5507 | 436.3786 | 355.7627 |
| 5791  | OSBPL1A   | 5441.634 | -0.52233 | 0.122042 | -4.2799  | 1.87E-05 | 8.58E-05 | 5959.155 | 7530.197 | 5761.351 | 4118.274 | 4624.757 | 4656.07  |
| 21767 | LOC119611 | 16.12221 | -0.52236 | 0.682747 | -0.76509 | 0.444218 | 0.542544 | 19.51511 | 19.70683 | 16.69755 | 13.39276 | 21.39111 | 6.029877 |
| 3508  | RPL7L1    | 9967.638 | -0.52239 | 0.089316 | -5.84881 | 4.95E-09 | 3.75E-08 | 12471.78 | 10973.96 | 11816.3  | 7912.89  | 8214.185 | 8416.703 |
| 5296  | KLHL11    | 944.1356 | -0.52253 | 0.115611 | -4.5197  | 6.19E-06 | 3.11E-05 | 1161.149 | 1103.582 | 1071.426 | 812.4942 | 776.4972 | 739.6649 |
| 8479  | KIN       | 847.3838 | -0.52266 | 0.160318 | -3.26012 | 0.001114 | 0.003492 | 913.9576 | 1236.056 | 848.7923 | 680.7987 | 678.0981 | 726.6002 |
| 18419 | KCNIP3    | 48.89456 | -0.52266 | 0.414242 | -1.26172 | 0.207048 | 0.298824 | 63.96619 | 43.79295 | 63.31155 | 49.10679 | 47.06043 | 26.12947 |
| 5686  | ERH       | 7245.578 | -0.52268 | 0.120635 | -4.33278 | 1.47E-05 | 6.88E-05 | 9212.216 | 7058.875 | 9358.283 | 6198.617 | 5955.284 | 5690.194 |
| 3894  | STARD7    | 7924.403 | -0.52299 | 0.09597  | -5.44947 | 5.05E-08 | 3.45E-07 | 9266.966 | 10156.13 | 8615.937 | 6424.061 | 6316.794 | 6766.527 |
| 6305  | CCDC88A   | 7816.674 | -0.52308 | 0.12999  | -4.02399 | 5.72E-05 | 0.000241 | 8374.15  | 11233.44 | 8049.612 | 6278.973 | 6252.62  | 6711.253 |
| 5480  | SDAD1     | 2703.023 | -0.52309 | 0.118341 | -4.42018 | 9.86E-06 | 4.78E-05 | 3028.094 | 3671.491 | 2865.718 | 2200.877 | 2145.528 | 2306.428 |
| 4992  | ZNFB39    | 1160.661 | -0.52318 | 0.111491 | -4.69259 | 2.70E-06 | 1.44E-05 | 1335.701 | 1468.158 | 1303.105 | 950.8861 | 943.3478 | 962.7703 |
| 4990  | NIPA2     | 2265.45  | -0.52337 | 0.111473 | -4.69508 | 2.67E-06 | 1.42E-05 | 2904.499 | 2448.026 | 2669.521 | 1774.541 | 1786.157 | 2009.959 |
| 4897  | SBNO1     | 5333.062 | -0.52355 | 0.110369 | -4.74367 | 2.10E-06 | 1.14E-05 | 6063.778 | 7146.461 | 5663.253 | 4361.576 | 4192.657 | 4570.647 |
| 14717 | ERFL      | 135.6109 | -0.52362 | 0.27752  | -1.88677 | 0.059191 | 0.106923 | 137.1479 | 208.0165 | 134.2762 | 131.6955 | 91.98176 | 110.5477 |
| 9134  | LOC103241 | 359.0997 | -0.52378 | 0.170543 | -3.07123 | 0.002132 | 0.006205 | 446.1371 | 399.0632 | 430.6577 | 256.6946 | 282.3626 | 339.6831 |
| 8225  | SMC4      | 17828.16 | -0.52382 | 0.156867 | -3.33928 | 0.00084  | 0.002715 | 17651.96 | 27854.5  | 17582.52 | 14218.65 | 14836.87 | 14824.45 |
| 5201  | DGKD      | 3355.892 | -0.52387 | 0.114419 | -4.57852 | 4.68E-06 | 2.39E-05 | 4174.607 | 3830.24  | 3881.485 | 2573.642 | 2517.733 | 3157.645 |
| 4078  | MRPL37    | 4864.931 | -0.52389 | 0.098572 | -5.31479 | 1.07E-07 | 6.96E-07 | 5671.85  | 6074.081 | 5477.493 | 3933.008 | 3717.774 | 4315.382 |
| 6323  | RNF135    | 760.1001 | -0.52425 | 0.130578 | -4.01482 | 5.95E-05 | 0.00025  | 980.6342 | 865.4581 | 847.4008 | 607.1385 | 594.6728 | 665.2964 |
| 5063  | GGPS1     | 1455.592 | -0.52446 | 0.112698 | -4.65372 | 3.26E-06 | 1.71E-05 | 1811.111 | 1548.628 | 1792.9   | 1214.277 | 1163.676 | 1202.96  |
| 5972  | LOC119621 | 1577.764 | -0.52447 | 0.125589 | -4.17613 | 2.97E-05 | 0.000132 | 1817.074 | 2126.695 | 1641.926 | 1310.259 | 1229.989 | 1340.643 |
| 4327  | MYO19     | 2957.643 | -0.52449 | 0.102176 | -5.13319 | 2.85E-07 | 1.75E-06 | 3659.083 | 3358.371 | 3459.176 | 2328.108 | 2290.988 | 2650.131 |
| 3779  | SMAD5     | 4312.408 | -0.52451 | 0.094231 | -5.56617 | 2.60E-08 | 1.83E-07 | 5043.029 | 5410.618 | 4809.591 | 3379.44  | 3694.244 | 3537.528 |
| 8409  | WNT7A     | 382.8445 | -0.52484 | 0.160054 | -3.27914 | 0.001041 | 0.003292 | 478.6623 | 448.8777 | 425.0919 | 354.9082 | 293.0582 | 296.4689 |
| 3545  | LOC103241 | 53875.61 | -0.52484 | 0.090369 | -5.80777 | 6.33E-09 | 4.75E-08 | 63716.29 | 66117.49 | 60882.06 | 41901.49 | 42715.9  | 47920.44 |
| 8396  | E2F2      | 416.1046 | -0.52485 | 0.159873 | -3.28292 | 0.001027 | 0.003253 | 545.3389 | 437.9295 | 491.8821 | 328.1227 | 331.5622 | 361.7926 |
| 10530 | LOC119621 | 329.7236 | -0.52486 | 0.191669 | -2.73834 | 0.006175 | 0.015591 | 318.7468 | 464.2052 | 382.6523 | 287.9444 | 269.5279 | 255.2648 |
| 17746 | LOC119621 | 64.48118 | -0.52486 | 0.381317 | -1.37644 | 0.168686 | 0.252436 | 93.23886 | 56.93083 | 77.22618 | 75.89232 | 36.36488 | 47.23404 |
| 14058 | LOC103241 | 115.355  | -0.52487 | 0.262166 | -2.002   |          |          |          |          |          |          |          |          |



|       |             |          |          |          |          |          |          |          |          |          |          |          |          |
|-------|-------------|----------|----------|----------|----------|----------|----------|----------|----------|----------|----------|----------|----------|
| 3130  | ATP5PD      | 7383.817 | -0.52543 | 0.084161 | -6.24315 | 4.29E-10 | 3.64E-09 | 8896.721 | 8297.121 | 8944.323 | 6138.349 | 6122.135 | 5904.254 |
| 18198 | LOC103225   | 43.0156  | -0.52564 | 0.403626 | -1.30229 | 0.192817 | 0.281682 | 54.75072 | 45.98259 | 51.48412 | 26.78552 | 44.92132 | 34.1693  |
| 15022 | LOC103245   | 96.63389 | -0.52572 | 0.287425 | -1.82908 | 0.067387 | 0.119257 | 110.0435 | 128.0944 | 102.2725 | 73.66019 | 98.39909 | 67.33362 |
| 4597  | TTC21B      | 2345.74  | -0.52588 | 0.106365 | -4.94413 | 7.65E-07 | 4.42E-06 | 2787.408 | 2998.722 | 2515.765 | 1959.807 | 1961.564 | 1851.172 |
| 13296 | APOBEC3D    | 209.7315 | -0.52592 | 0.244797 | -2.1484  | 0.031682 | 0.063348 | 202.7403 | 320.2359 | 219.8511 | 140.624  | 201.0764 | 173.8614 |
| 3765  | TTC26       | 2030.828 | -0.526   | 0.094277 | -5.57932 | 2.41E-08 | 1.71E-07 | 2473.54  | 2390     | 2326.526 | 1683.024 | 1655.672 | 1656.206 |
| 4080  | TLL12       | 4488.67  | -0.52628 | 0.099054 | -5.31303 | 1.08E-07 | 7.03E-07 | 5337.924 | 5372.847 | 5193.635 | 3620.51  | 3369.099 | 4038.008 |
| 4995  | NUP160      | 2404.796 | -0.52654 | 0.11225  | -4.69074 | 2.72E-06 | 1.45E-05 | 2943.529 | 2850.921 | 2731.441 | 1774.541 | 1912.365 | 2215.98  |
| 4863  | WDR19       | 2452.55  | -0.5269  | 0.11056  | -4.76577 | 1.88E-06 | 1.03E-05 | 2931.603 | 3033.209 | 2730.05  | 1933.022 | 1850.331 | 2237.084 |
| 5273  | ABLIM1      | 1150.383 | -0.52713 | 0.116217 | -4.53572 | 5.74E-06 | 2.89E-05 | 1324.859 | 1459.947 | 1291.973 | 874.9938 | 979.7127 | 970.8102 |
| 4659  | RTCB        | 3728.609 | -0.52741 | 0.107337 | -4.91358 | 8.94E-07 | 5.10E-06 | 4883.656 | 4040.447 | 4288.488 | 3024.532 | 2898.495 | 3236.034 |
| 22394 | P2RX3       | 11.08312 | -0.52758 | 0.801079 | -0.65859 | 0.510158 | 0.605633 | 11.38381 | 15.87494 | 11.1317  | 13.39276 | 10.69555 | 4.019918 |
| 10157 | LOC119627   | 347.6427 | -0.52763 | 0.186845 | -2.82391 | 0.004744 | 0.012417 | 479.2044 | 332.279  | 420.9175 | 270.0874 | 290.9191 | 292.449  |
| 5859  | RANBP17     | 1599.369 | -0.52768 | 0.124535 | -4.23723 | 2.26E-05 | 0.000103 | 2014.393 | 1659.205 | 1987.009 | 1337.044 | 1409.674 | 1188.891 |
| 9438  | LOC103214   | 400.4193 | -0.52778 | 0.175968 | -2.99931 | 0.002706 | 0.007622 | 414.154  | 556.7178 | 445.9638 | 312.4978 | 363.6488 | 309.5337 |
| 8653  | CCDC149     | 417.7968 | -0.52784 | 0.164198 | -3.21464 | 0.001306 | 0.004013 | 441.2583 | 553.4333 | 487.7077 | 352.6761 | 305.8928 | 365.8125 |
| 5730  | LIN9        | 765.4963 | -0.52791 | 0.122506 | -4.30929 | 1.64E-05 | 7.60E-05 | 872.7591 | 934.432  | 905.8422 | 584.8173 | 660.9852 | 634.142  |
| 5864  | CLDN2       | 1414.01  | -0.52791 | 0.124648 | -4.23524 | 2.28E-05 | 0.000104 | 1562.835 | 1861.748 | 1591.138 | 1091.51  | 1099.503 | 1277.329 |
| 17218 | F12         | 72.7006  | -0.52798 | 0.360388 | -1.46503 | 0.142914 | 0.220662 | 102.4543 | 56.38342 | 98.09812 | 73.66019 | 51.33866 | 54.26889 |
| 3653  | COL6A1      | 27067.3  | -0.52803 | 0.092711 | -5.69544 | 1.23E-08 | 8.96E-08 | 30653.9  | 33555.25 | 31696.83 | 22336.89 | 20392.14 | 23768.77 |
| 20371 | LOC103222   | 22.89207 | -0.52827 | 0.546903 | -0.96593 | 0.334081 | 0.43599  | 28.73058 | 32.84471 | 19.48048 | 20.08914 | 17.11289 | 19.09461 |
| 20148 | CRNAM       | 24.13367 | -0.52827 | 0.5262   | -1.00394 | 0.315408 | 0.41617  | 22.76763 | 33.93953 | 28.52499 | 20.08914 | 21.39111 | 18.08963 |
| 22479 | TRNAT-UG    | 10.73938 | -0.5283  | 0.823154 | -0.6418  | 0.521003 | 0.616132 | 11.38381 | 11.49565 | 15.30609 | 2.232127 | 14.97377 | 9.044815 |
| 8415  | ESF1        | 2931.706 | -0.52841 | 0.161225 | -3.27749 | 0.001047 | 0.003309 | 2977.68  | 4552.277 | 2857.369 | 2417.394 | 2393.665 | 2391.851 |
| 6284  | TEAD4       | 635.7374 | -0.52843 | 0.130929 | -4.03598 | 5.44E-05 | 0.00023  | 738.8637 | 781.1567 | 736.7795 | 486.6037 | 511.2474 | 559.7736 |
| 6178  | USP31       | 1298.826 | -0.52852 | 0.129294 | -4.08775 | 4.36E-05 | 0.000187 | 1510.795 | 1657.563 | 1441.555 | 1024.546 | 945.4869 | 1213.01  |
| 5163  | MIS12       | 1075.259 | -0.52859 | 0.115005 | -4.59624 | 4.30E-06 | 2.22E-05 | 1324.859 | 1197.737 | 1283.624 | 933.0291 | 879.1745 | 833.128  |
| 20455 | LOC119625   | 22.59197 | -0.52867 | 0.554745 | -0.953   | 0.340592 | 0.442648 | 31.44101 | 27.918   | 21.56767 | 13.39276 | 17.11289 | 24.11951 |
| 6563  | MTFR2       | 512.7966 | -0.52909 | 0.135145 | -3.915   | 9.04E-05 | 0.000366 | 595.2108 | 602.153  | 621.9838 | 404.015  | 419.2657 | 434.1511 |
| 10453 | RBX1        | 2440.305 | -0.52944 | 0.192189 | -2.7548  | 0.005873 | 0.014935 | 3405.387 | 1820.692 | 3422.998 | 2051.325 | 1995.79  | 1945.64  |
| 9356  | NFKBIB      | 258.6621 | -0.52951 | 0.175499 | -3.01715 | 0.002552 | 0.00725  | 295.4371 | 318.0463 | 304.7303 | 200.8914 | 211.772  | 221.0955 |
| 9952  | WBP4        | 673.3283 | -0.52968 | 0.184281 | -2.87429 | 0.004049 | 0.010817 | 668.9346 | 1034.061 | 683.2082 | 513.3892 | 594.6728 | 545.7039 |
| 7567  | CUNH17or    | 614.5029 | -0.52971 | 0.149825 | -3.53551 | 0.000407 | 0.00143  | 783.8569 | 623.5021 | 774.349  | 486.6037 | 477.0217 | 541.6839 |
| 14934 | FBXO43      | 107.9161 | -0.52975 | 0.286716 | -1.84765 | 0.064653 | 0.115092 | 130.6428 | 124.8099 | 123.8402 | 91.51721 | 13.3729  | 63.31371 |
| 7483  | LOC103215   | 866.0661 | -0.5298  | 0.148448 | -3.56895 | 0.000358 | 0.001273 | 1032.675 | 1180.22  | 854.3581 | 696.4236 | 759.3843 | 673.3362 |
| 23838 | LOC119625   | 4.245448 | -0.53001 | 1.227492 | -0.43178 | 0.665902 | 0.742638 | 5.96295  | 3.284471 | 5.565851 | 2.232127 | 6.417332 | 2.009959 |
| 5470  | CUNH15or    | 1015.361 | -0.53039 | 0.119768 | -4.42845 | 9.49E-06 | 4.61E-05 | 1119.408 | 1251.383 | 1225.879 | 808.03   | 900.5656 | 786.8989 |
| 9990  | PEX7        | 457.2655 | -0.53051 | 0.185267 | -2.86348 | 0.00419  | 0.011151 | 626.1098 | 444.4984 | 547.5406 | 448.6575 | 340.1186 | 336.6681 |
| 22746 | LOC103213   | 10.31478 | -0.53062 | 0.882354 | -0.60137 | 0.547596 | 0.640018 | 12.46799 | 4.379295 | 19.48048 | 6.696381 | 12.83466 | 6.029877 |
| 3612  | PPARG       | 2832.558 | -0.53091 | 0.092696 | -5.72741 | 1.02E-08 | 7.51E-08 | 3361.478 | 3484.824 | 3200.364 | 2258.913 | 2305.961 | 2383.811 |
| 4610  | CCT3        | 15555.76 | -0.53103 | 0.107521 | -4.93887 | 7.86E-07 | 4.53E-06 | 19461.98 | 15745.75 | 19954.97 | 12649.46 | 12533.05 | 12989.36 |
| 21694 | LOC103226   | 17.69836 | -0.53111 | 0.682596 | -0.77808 | 0.436524 | 0.53494  | 20.0572  | 15.87494 | 25.74206 | 26.78552 | 10.69555 | 7.034856 |
| 12462 | LOC119625   | 150.0269 | -0.53114 | 0.230127 | -2.308   | 0.020999 | 0.044797 | 184.3094 | 175.1718 | 171.1499 | 109.3742 | 147.5986 | 112.5577 |
| 8407  | MLYCD       | 701.6261 | -0.53119 | 0.161944 | -3.28007 | 0.001038 | 0.003282 | 948.6511 | 679.3381 | 864.0984 | 513.3892 | 571.1425 | 633.1371 |
| 24920 | LOC119625   | 1.696202 | -0.53128 | 2.035684 | -0.26098 | 0.794107 | 0.847178 | 1.084173 | 0.547412 | 4.174388 | 2.232127 | 2.139111 | 0        |
| 8837  | SLC22A17    | 601.8384 | -0.53136 | 0.168101 | -3.16095 | 0.001573 | 0.004731 | 784.9411 | 582.9936 | 770.8704 | 484.3716 | 432.1004 | 555.7536 |
| 5214  | RNFT1       | 1541.999 | -0.53158 | 0.116249 | -4.57279 | 4.81E-06 | 2.45E-05 | 1876.703 | 1639.498 | 1950.135 | 1229.902 | 1349.779 | 1205.975 |
| 4114  | GTF2A2      | 1766.21  | -0.53169 | 0.100618 | -5.2842  | 1.26E-07 | 8.16E-07 | 2015.477 | 2068.122 | 2179.031 | 1515.614 | 1398.978 | 1420.036 |
| 4461  | SRI         | 2534.842 | -0.53175 | 0.10561  | -5.035   | 4.78E-07 | 2.85E-06 | 3114.828 | 2745.818 | 3126.617 | 2011.146 | 2226.814 | 1983.829 |
| 5503  | AARS2       | 2419.871 | -0.53179 | 0.120611 | -4.40915 | 1.04E-05 | 5.01E-05 | 3129.465 | 2605.133 | 2855.977 | 1912.933 | 1794.714 | 2221.005 |
| 3277  | CCT4        | 10771.12 | -0.53183 | 0.087756 | -6.06027 | 1.36E-09 | 1.10E-08 | 13497.95 | 12023.35 | 12685.27 | 8814.669 | 8509.382 | 9096.069 |
| 5353  | ABRAXAS2    | 1371.724 | -0.53185 | 0.118505 | -4.48804 | 7.19E-06 | 3.57E-05 | 1505.916 | 1820.692 | 1537.566 | 1127.224 | 1129.45  | 1109.497 |
| 4573  | ARIH2       | 3068.512 | -0.53188 | 0.107263 | -4.95862 | 7.10E-07 | 4.13E-06 | 3766.416 | 3636.457 | 3489.789 | 2428.554 | 2290.988 | 2798.868 |
| 4892  | FOXK1       | 4662.748 | -0.53188 | 0.112072 | -4.74588 | 2.08E-06 | 1.13E-05 | 5582.405 | 5285.261 | 5677.864 | 3957.561 | 3268.561 | 4204.834 |
| 5975  | NBDY        | 1087.568 | -0.5319  | 0.127394 | -4.17526 | 2.98E-05 | 0.000132 | 1254.93  | 1416.154 | 1191.788 | 850.4404 | 834.2532 | 977.845  |
| 4690  | RIF1        | 9539.006 | -0.53193 | 0.10877  | -4.89039 | 1.01E-06 | 5.70E-06 | 10690.49 | 12910.16 | 10235.6  | 7515.572 | 7782.085 | 8100.135 |
| 5464  | LSR         | 882.6635 | -0.53197 | 0.120014 | -4.43256 | 9.31E-06 | 4.53E-05 | 1019.664 | 1021.47  | 1092.994 | 738.834  | 665.2634 | 757.7545 |
| 19272 | LOC103230   | 35.62164 | -0.53204 | 0.466228 | -1.14116 | 0.253804 | 0.350135 | 43.909   | 41.6033  | 38.96096 | 37.94616 | 34.22577 | 17.08465 |
| 10467 | NLGN2       | 290.505  | -0.53216 | 0.193346 | -2.75236 | 0.005917 | 0.015028 | 307.363  | 409.464  | 315.862  | 225.4448 | 224.6066 | 260.2897 |
| 24576 | LOC103238   | 2.125322 | -0.53238 | 1.664988 | -0.31975 | 0.749156 | 0.810397 | 3.794605 | 2.189647 | 1.391463 | 2.232127 | 2.139111 | 1.004979 |
| 6369  | FAM83D      | 1167.475 | -0.53243 | 0.133254 | -3.99557 | 6.45E-05 | 0.000269 | 1417.014 | 1399.732 | 1333.717 | 897.315  | 838.5314 | 1118.542 |
| 4949  | LOC103235   | 2318.273 | -0.53251 | 0.112964 | -4.71393 | 2.43E-06 | 1.31E-05 | 2699.048 | 2950.55  | 2581.859 | 1845.969 | 1734.819 | 2097.392 |
| 5439  | TRAPPC13    | 1208.632 | -0.53257 | 0.119825 | -4.44454 | 8.81E-06 | 4.31E-05 | 1504.832 | 1283.681 | 1500.693 | 928.5648 | 1031.051 | 1002.97  |
| 4833  | TIMM9       | 1775.544 | -0.53285 | 0.111154 | -4.79383 | 1.64E-06 | 9.00E-06 | 2038.787 | 2018.307 | 2235.385 | 1520.078 | 1525.186 | 1315.518 |
| 22295 | LOC119618   | 10.27997 | -0.53288 | 0.789287 | -0.67514 | 0.499585 | 0.595715 | 14.09425 | 11.49565 | 10.43597 | 8.928508 | 10.69555 | 6.029877 |
| 18692 | LOC119620   | 37.00113 | -0.53302 | 0.433252 | -1.23027 | 0.218595 | 0.3109   | 46.61943 | 36.12918 | 49.39693 | 29.01765 | 25.66933 | 35.17428 |
| 5948  | PRKCE       | 745.4317 | -0.53308 | 0.12733  | -4.18662 | 2.83E-05 | 0.000127 | 893.9004 | 907.6088 | 848.0965 | 595.9779 | 564.7252 | 662.2815 |
| 4469  | TOMM20      | 5255.999 | -0.53319 | 0.106007 | -5.02974 | 4.91E-07 | 2.92E-06 | 6364.094 | 5458.791 | 6827.908 | 4299.077 | 4237.578 | 4348.546 |
| 8013  | LOC103222   | 457.9909 | -0.53332 | 0.15648  | -3.40823 | 0.000654 | 0.002169 | 510.6454 | 561.6445 | 547.5406 | 388.3901 | 417.1266 | 322.5984 |
| 6325  | LOC103227   | 1858.279 | -0.53334 | 0.132865 | -4.01417 | 5.97E-05 | 0.000251 | 2011.14  | 2627.029 | 1954.309 | 1508.918 | 1550.855 | 1497.419 |
| 19772 | LOC119625</ |          |          |          |          |          |          |          |          |          |          |          |          |



|       |           |          |          |          |          |          |          |          |          |          |          |          |            |
|-------|-----------|----------|----------|----------|----------|----------|----------|----------|----------|----------|----------|----------|------------|
| 23634 | LOC119615 | 4.721004 | -0.53412 | 1.151793 | -0.46373 | 0.642842 | 0.723122 | 4.878777 | 8.211177 | 3.478657 | 4.464254 | 4.278221 | 3.014938   |
| 5841  | GGACT     | 765.2817 | -0.5342  | 0.1256   | -4.2532  | 2.11E-05 | 9.59E-05 | 860.8332 | 942.0957 | 917.6697 | 609.3707 | 590.3945 | 671.3263   |
| 7473  | CEP76     | 513.8795 | -0.53423 | 0.149586 | -3.57136 | 0.000355 | 0.001263 | 616.8943 | 600.5108 | 611.5479 | 354.9082 | 432.1004 | 467.3155   |
| 8992  | LCA5      | 409.341  | -0.53423 | 0.171268 | -3.11927 | 0.001813 | 0.00536  | 434.2112 | 568.7609 | 452.2254 | 319.1942 | 320.8666 | 360.7876   |
| 4575  | GATC      | 1485.98  | -0.53427 | 0.107769 | -4.95757 | 7.14E-07 | 4.15E-06 | 1724.377 | 1888.023 | 1664.189 | 1183.027 | 1200.041 | 1256.224   |
| 7362  | JARID2    | 804.8908 | -0.53448 | 0.147938 | -3.61288 | 0.000303 | 0.001093 | 889.0216 | 1091.539 | 881.4916 | 580.353  | 650.2896 | 736.65     |
| 9491  | MRPL21    | 1165.003 | -0.53456 | 0.179008 | -2.98624 | 0.002824 | 0.007911 | 1629.512 | 971.656  | 1536.175 | 948.654  | 892.0091 | 1012.014   |
| 6380  | CCND3     | 2757.467 | -0.53501 | 0.134177 | -3.98733 | 6.68E-05 | 0.000278 | 3578.312 | 2848.184 | 3371.514 | 2107.128 | 2008.625 | 2631.036   |
| 19515 | EPHX3     | 27.69412 | -0.53503 | 0.486915 | -1.09881 | 0.271852 | 0.370365 | 29.27266 | 38.31883 | 30.61218 | 22.32127 | 23.53022 | 22.10955   |
| 6309  | JUNB      | 2972.246 | -0.53514 | 0.133066 | -4.02162 | 5.78E-05 | 0.000244 | 3666.672 | 2966.425 | 3919.751 | 2685.249 | 2124.137 | 2471.245   |
| 23735 | LOC119627 | 4.658939 | -0.53595 | 1.197287 | -0.44764 | 0.654415 | 0.732995 | 4.878777 | 4.926706 | 6.261582 | 4.464254 | 6.417332 | 1.004979   |
| 22168 | LOC103247 | 12.08079 | -0.53609 | 0.769377 | -0.69679 | 0.485936 | 0.582759 | 19.51511 | 15.32753 | 7.653045 | 13.39276 | 8.556443 | 8.039836   |
| 23207 | LOC119620 | 7.23126  | -0.53614 | 1.014729 | -0.52836 | 0.597252 | 0.684188 | 5.96295  | 8.211177 | 11.1317  | 2.232127 | 12.83466 | 3.014938   |
| 19800 | LOC119627 | 27.50971 | -0.53614 | 0.508886 | -1.05356 | 0.292083 | 0.392173 | 37.94605 | 33.93953 | 25.04633 | 20.08914 | 29.94755 | 18.08963   |
| 24657 | TRNAA-AG  | 2.165545 | -0.5362  | 1.748388 | -0.30669 | 0.759083 | 0.818438 | 3.794605 | 1.642235 | 2.087194 | 4.464254 | 0        | 1.004979   |
| 4861  | MCM8      | 2009.753 | -0.53653 | 0.112426 | -4.77234 | 1.82E-06 | 9.96E-06 | 2312.54  | 2629.766 | 2199.207 | 1546.864 | 1638.559 | 1731.58    |
| 5956  | TAF10     | 3509.737 | -0.53654 | 0.128238 | -4.18396 | 2.86E-05 | 0.000128 | 3826.046 | 4937.655 | 3704.77  | 2819.176 | 2699.558 | 3071.217   |
| 11645 | LOC119620 | 210.1959 | -0.53663 | 0.21618  | -2.48233 | 0.013053 | 0.029799 | 214.6662 | 292.3179 | 237.2444 | 194.195  | 168.9897 | 153.7619   |
| 14486 | LOC103240 | 166.4726 | -0.53675 | 0.278439 | -1.92771 | 0.053891 | 0.098903 | 235.8076 | 126.4521 | 228.1999 | 136.1597 | 147.5986 | 124.6175   |
| 7684  | TBC1D19   | 476.8532 | -0.53676 | 0.153474 | -3.49736 | 0.00047  | 0.001626 | 593.5846 | 608.7219 | 492.5778 | 379.4616 | 380.7617 | 406.0117   |
| 24314 | TRNAS-GCI | 2.591244 | -0.53682 | 1.493509 | -0.35944 | 0.719269 | 0.786451 | 3.794605 | 3.284471 | 2.087194 | 2.232127 | 2.139111 | 2.009959   |
| 6254  | SORT1     | 1883.667 | -0.5369  | 0.132631 | -4.04809 | 5.16E-05 | 0.00022  | 2139.073 | 2518.094 | 2041.276 | 1397.311 | 1437.482 | 1768.764   |
| 18401 | LOC119627 | 63.99639 | -0.53699 | 0.424715 | -1.26436 | 0.206099 | 0.297764 | 65.05036 | 112.2194 | 48.00546 | 62.49956 | 62.03421 | 34.1693    |
| 5027  | MIF4GD    | 1934.24  | -0.53709 | 0.114914 | -4.67382 | 2.96E-06 | 1.56E-05 | 2213.881 | 2460.069 | 2204.077 | 1542.4   | 1435.343 | 1749.669   |
| 21656 | LOC103216 | 19.72969 | -0.53711 | 0.686238 | -0.78268 | 0.433813 | 0.532477 | 28.18849 | 12.04306 | 29.22072 | 8.928508 | 29.94755 | 10.04979   |
| 22370 | DPY19L2   | 14.53809 | -0.53721 | 0.809516 | -0.66361 | 0.506938 | 0.602457 | 20.59928 | 13.13788 | 16.69755 | 13.39276 | 21.39111 | 2.009959   |
| 4290  | NPEPPS    | 5656.979 | -0.53745 | 0.1041   | -5.1628  | 2.43E-07 | 1.51E-06 | 6543.525 | 7339.698 | 6216.36  | 4236.577 | 4795.886 | 4809.832   |
| 5710  | LOC103215 | 2396.877 | -0.53759 | 0.124424 | -4.3206  | 1.56E-05 | 7.24E-05 | 2648.634 | 3334.285 | 2530.375 | 1966.504 | 1982.956 | 1918.506   |
| 4794  | ASCC1     | 1042.889 | -0.53762 | 0.111593 | -4.81764 | 1.45E-06 | 8.06E-06 | 1243.546 | 1262.879 | 1199.441 | 801.3336 | 889.87   | 860.2624   |
| 5124  | CDC26     | 1461.672 | -0.53775 | 0.116484 | -4.6165  | 3.90E-06 | 2.02E-05 | 1668     | 1920.321 | 1601.574 | 1187.492 | 1244.962 | 1147.687   |
| 7435  | RGS2      | 531.263  | -0.53781 | 0.149965 | -3.58624 | 0.000335 | 0.0012   | 569.7328 | 707.8035 | 611.5479 | 441.9611 | 404.2919 | 452.2408   |
| 17744 | LOC103225 | 55.9114  | -0.53782 | 0.390475 | -1.37735 | 0.168404 | 0.252319 | 75.89209 | 71.16354 | 52.87558 | 26.78552 | 53.47777 | 55.27387   |
| 4229  | PIGRMC1   | 4072.004 | -0.53782 | 0.103457 | -5.19853 | 2.01E-07 | 1.26E-06 | 5220.292 | 4391.338 | 4861.075 | 3198.638 | 3232.196 | 3528.483   |
| 3641  | PP5K1A    | 6777.602 | -0.53784 | 0.094318 | -5.70247 | 1.18E-08 | 8.62E-08 | 7815.259 | 8694.542 | 7572.34  | 5602.639 | 5283.603 | 5697.229   |
| 4288  | NIT1      | 1323.672 | -0.53795 | 0.104187 | -5.16327 | 2.43E-07 | 1.50E-06 | 1592.65  | 1582.02  | 1532     | 1044.635 | 1063.138 | 1127.587   |
| 24254 | LOC103248 | 2.960074 | -0.53806 | 1.462436 | -0.36792 | 0.71293  | 0.781475 | 5.420864 | 2.737059 | 2.087194 | 2.232127 | 4.278221 | 1.004979   |
| 4590  | GABPA     | 2399.693 | -0.53815 | 0.108748 | -4.94862 | 7.47E-07 | 4.33E-06 | 2706.637 | 3163.493 | 2656.998 | 1879.451 | 2010.764 | 1980.815   |
| 19449 | LOC119615 | 34.84577 | -0.53826 | 0.484772 | -1.11034 | 0.266852 | 0.364803 | 44.99317 | 39.96106 | 36.87376 | 37.94616 | 34.22577 | 15.07469   |
| 21954 | LOC119628 | 14.12644 | -0.53831 | 0.732037 | -0.73535 | 0.462125 | 0.559606 | 21.68345 | 14.23271 | 13.2189  | 15.62489 | 14.97377 | 5.024897   |
| 22315 | SIM2      | 10.45484 | -0.53831 | 0.800252 | -0.67267 | 0.501156 | 0.597053 | 14.09425 | 10.40082 | 12.52316 | 13.39276 | 4.278221 | 8.039836   |
| 3535  | OSBPL3    | 3245.344 | -0.53851 | 0.092505 | -5.82137 | 5.84E-09 | 4.39E-08 | 3788.1   | 4049.753 | 3697.117 | 2656.231 | 2558.376 | 2722.489   |
| 15725 | LOC103220 | 106.8518 | -0.53859 | 0.31434  | -1.7134  | 0.086639 | 0.146473 | 111.1277 | 144.5167 | 121.0573 | 127.2312 | 74.86887 | 62.30873   |
| 9250  | ZNHIT6    | 892.2279 | -0.53865 | 0.177031 | -3.04269 | 0.002345 | 0.006739 | 886.8533 | 1358.676 | 928.1056 | 647.3168 | 729.4367 | 802.9786   |
| 24000 | LOC119620 | 3.809571 | -0.53867 | 1.32523  | -0.40647 | 0.684394 | 0.758109 | 2.710432 | 4.926706 | 5.565851 | 2.232127 | 6.417332 | 1.004979   |
| 3281  | NUP155    | 6051.124 | -0.5387  | 0.088936 | -6.05717 | 1.39E-09 | 1.12E-08 | 7318.166 | 7309.59  | 6882.87  | 4803.537 | 4761.66  | 5230.918   |
| 8753  | LOC119627 | 305.974  | -0.53872 | 0.168988 | -3.18788 | 0.001433 | 0.004353 | 375.1238 | 367.3133 | 347.8657 | 243.3018 | 228.8848 | 273.3544   |
| 5565  | GIN52     | 756.4199 | -0.53886 | 0.122803 | -4.388   | 1.14E-05 | 5.47E-05 | 847.8231 | 943.1906 | 895.4063 | 633.9241 | 618.203  | 599.9727   |
| 6435  | KLHL26    | 687.9265 | -0.53893 | 0.135874 | -3.96635 | 7.30E-05 | 0.000302 | 841.318  | 728.6051 | 876.6215 | 573.6566 | 530.4994 | 576.8582   |
| 5759  | NUCKS1    | 30274.85 | -0.53909 | 0.125476 | -4.29634 | 1.74E-05 | 8.02E-05 | 32601.07 | 43329.83 | 31671.08 | 24127.06 | 23731.29 | 26188.76   |
| 6002  | LOC103235 | 3075.244 | -0.53934 | 0.129546 | -4.16331 | 3.14E-05 | 0.000139 | 3284.501 | 4379.295 | 3264.372 | 2573.642 | 2515.594 | 2434.06    |
| 20632 | LOC119618 | 21.03931 | -0.53938 | 0.579552 | -0.93069 | 0.352014 | 0.453582 | 26.56223 | 27.37059 | 20.17621 | 13.39276 | 25.66933 | 13.06473   |
| 4759  | LOC119620 | 5967.264 | -0.5395  | 0.111507 | -4.83827 | 1.31E-06 | 7.32E-06 | 6442.697 | 8162.458 | 6604.578 | 4953.09  | 4793.747 | 4847.016   |
| 3143  | SLC20A1   | 17459.37 | -0.53952 | 0.08665  | -6.22644 | 4.77E-10 | 4.04E-09 | 21134.32 | 20975.73 | 19957.75 | 13912.85 | 13566.24 | 15209.36   |
| 3036  | PSME1     | 7208.901 | -0.53962 | 0.084885 | -6.35709 | 2.06E-10 | 1.80E-09 | 8485.82  | 8213.367 | 8922.755 | 5868.262 | 6040.849 | 5722.353   |
| 7285  | PRKCZ     | 437.3302 | -0.53966 | 0.148318 | -3.63856 | 0.000274 | 0.001001 | 505.7666 | 551.7911 | 498.1437 | 328.1227 | 374.3444 | 365.8125   |
| 6370  | DIS3      | 3037.082 | -0.53982 | 0.135115 | -3.99526 | 6.46E-05 | 0.00027  | 3194.515 | 4401.191 | 3198.973 | 2504.446 | 2496.342 | 2427.025   |
| 8864  | LOC103245 | 449.4118 | -0.54018 | 0.1713   | -3.15341 | 0.001614 | 0.00484  | 602.8    | 485.5543 | 514.8412 | 332.5869 | 331.5622 | 429.1262   |
| 6395  | KTN1      | 23541.87 | -0.54032 | 0.135707 | -3.98153 | 6.85E-05 | 0.000285 | 24744.07 | 34859.73 | 24095.96 | 18669.51 | 19046.64 | 19835.28   |
| 3613  | ZNF207    | 11253.43 | -0.54033 | 0.094372 | -5.72556 | 1.03E-08 | 7.59E-08 | 13235.04 | 14471.38 | 12306.79 | 9033.418 | 8928.648 | 9545.295   |
| 8793  | CBX5      | 4277.799 | -0.54055 | 0.170207 | -3.17582 | 0.001494 | 0.004517 | 4075.405 | 6863.997 | 4270.399 | 3573.635 | 3349.847 | 3533.508   |
| 20608 | LOC103245 | 20.16633 | -0.54072 | 0.577896 | -0.93568 | 0.349439 | 0.450788 | 26.56223 | 22.44388 | 23.65487 | 13.39276 | 12.83466 | 22.10955   |
| 20231 | LOC119625 | 27.04516 | -0.54082 | 0.545916 | -0.99066 | 0.321852 | 0.422937 | 31.9831  | 26.82318 | 36.17803 | 17.85702 | 36.36488 | 13.06473   |
| 7772  | ATF7IP2   | 439.5268 | -0.54088 | 0.155805 | -3.47154 | 0.000517 | 0.00177  | 524.7396 | 544.1273 | 491.8821 | 325.8905 | 412.8484 | 337.6731   |
| 22790 | LOC119620 | 10.55106 | -0.54091 | 0.91045  | -0.59411 | 0.552438 | 0.64443  | 15.17842 | 15.87494 | 7.653045 | 2.232127 | 4.278221 | 18.08963   |
| 4098  | CUNH8orf  | 1642.158 | -0.54145 | 0.102214 | -5.29722 | 1.18E-07 | 7.63E-07 | 1872.366 | 2059.363 | 1906.304 | 1372.758 | 1332.666 | 1309.488   |
| 7806  | LOC103247 | 635.1021 | -0.54154 | 0.156354 | -3.46354 | 0.000533 | 0.001815 | 657.5508 | 892.2813 | 709.646  | 486.6037 | 536.9168 | 527.6142   |
| 24484 | LOC119627 | 2.643549 | -0.54158 | 1.624674 | -0.33335 | 0.738871 | 0.802274 | 1.084173 | 2.737059 | 5.565851 | 4.464254 | 0        | 2.009959   |
| 10509 | TGFB3     | 220.488  | -0.54174 | 0.197512 | -2.74281 | 0.006092 | 0.01541  | 241.2284 | 294.5076 | 248.3761 | 167.4095 | 192.52   | 178.8863   |
| 4504  | TMCC1     | 2599.466 | -0.54175 | 0.108159 | -5.00882 | 5.48E-07 | 3.23E-06 | 2969.549 | 3397.785 | 2883.111 | 2024.539 | 2070.659 | 2251.154   |
| 5672  | CHD3      | 9211.153 | -0.54209 | 0.124946 | -4.33858 | 1.43E-05 | 6.72E-05 | 9920.181 | 13073.29 | 9775.026 | 7281.198 | 7204.525 | 8012.701</ |



|       |            |          |          |           |          |          |          |          |          |          |          |          |          |
|-------|------------|----------|----------|-----------|----------|----------|----------|----------|----------|----------|----------|----------|----------|
| 6126  | SETD4      | 1247.613 | -0.54314 | 0.132285  | -4.1058  | 4.03E-05 | 0.000175 | 1691.852 | 1299.008 | 1450.6   | 941.9576 | 1046.025 | 1056.233 |
| 17455 | MRGPRF     | 74.0331  | -0.5432  | 0.383085  | -1.41796 | 0.156201 | 0.237902 | 102.9964 | 49.26706 | 110.6213 | 71.42806 | 55.61688 | 54.26889 |
| 4901  | ZNF460     | 2751.395 | -0.54355 | 0.114642  | -4.74131 | 2.12E-06 | 1.15E-05 | 3184.757 | 3570.767 | 3043.129 | 2154.003 | 2066.381 | 2489.334 |
| 3835  | DR1        | 2898.763 | -0.54361 | 0.098693  | -5.5081  | 3.63E-08 | 2.51E-07 | 3376.114 | 3719.663 | 3219.149 | 2390.608 | 2327.352 | 2359.692 |
| 4542  | RRP7A      | 1501.508 | -0.54364 | 0.109077  | -4.98398 | 6.23E-07 | 3.65E-06 | 1889.171 | 1678.912 | 1778.289 | 1140.617 | 1257.797 | 1264.264 |
| 9253  | SGK1       | 406.5109 | -0.54365 | 0.1787    | -3.04225 | 0.002348 | 0.006747 | 412.5277 | 544.1273 | 494.665  | 292.4086 | 314.4493 | 380.8872 |
| 4908  | LOC1032323 | 1450.173 | -0.54375 | 0.114727  | -4.73949 | 2.14E-06 | 1.16E-05 | 1812.195 | 1616.507 | 1735.154 | 1241.063 | 1060.999 | 1235.12  |
| 5798  | SHROOM2    | 895.964  | -0.54395 | 0.127251  | -4.27462 | 1.91E-05 | 8.78E-05 | 1053.274 | 1052.126 | 1089.515 | 732.1376 | 641.7332 | 806.9985 |
| 6145  | BBIP1      | 1082.885 | -0.54395 | 0.132687  | -4.0995  | 4.14E-05 | 0.000179 | 1250.593 | 1462.137 | 1137.521 | 892.8508 | 924.0958 | 830.113  |
| 4322  | TRA2B      | 10183.46 | -0.54432 | 0.105878  | -5.14098 | 2.73E-07 | 1.68E-06 | 11231.49 | 13782.73 | 11232.58 | 8035.657 | 8438.792 | 8379.519 |
| 5708  | SRP72      | 3537.077 | -0.54452 | 0.125971  | -4.32255 | 1.54E-05 | 7.18E-05 | 3853.692 | 4995.133 | 3743.035 | 2888.372 | 2759.453 | 2982.779 |
| 23159 | LOC119621  | 6.464998 | -0.54468 | 0.1016096 | -0.53605 | 0.591923 | 0.679488 | 10.84173 | 6.568942 | 5.565851 | 2.232127 | 8.556443 | 5.024897 |
| 4679  | INTS1      | 9790.282 | -0.54477 | 0.111232  | -4.8976  | 9.70E-07 | 5.51E-06 | 11956.26 | 10375.1  | 12527.34 | 8028.961 | 7148.908 | 8705.132 |
| 20368 | LOC119615  | 21.57613 | -0.54504 | 0.563997  | -0.96639 | 0.333847 | 0.435728 | 23.8518  | 29.01283 | 22.95914 | 22.32127 | 19.252   | 12.05975 |
| 5278  | PARP1      | 7798.686 | -0.5451  | 0.120247  | -4.53319 | 5.81E-06 | 2.93E-05 | 8886.422 | 10637.31 | 8245.808 | 6343.705 | 5743.512 | 6935.363 |
| 5033  | CHD1L      | 2438.47  | -0.54542 | 0.116748  | -4.67174 | 2.99E-06 | 1.58E-05 | 2809.634 | 3289.945 | 2583.946 | 1991.057 | 1908.087 | 2048.148 |
| 4028  | LOC103245  | 1697.776 | -0.54561 | 0.101946  | -5.35194 | 8.70E-08 | 5.74E-07 | 2044.208 | 1920.321 | 2076.758 | 1441.954 | 1381.865 | 1321.548 |
| 18122 | LRNAL-CA   | 51.64428 | -0.54565 | 0.414248  | -1.31722 | 0.187766 | 0.27546  | 68.30288 | 40.50847 | 76.53045 | 40.17829 | 32.08666 | 52.25893 |
| 23370 | LOC119615  | 5.625681 | -0.54598 | 1.084373  | -0.5035  | 0.614616 | 0.699168 | 8.131296 | 3.284471 | 8.348776 | 6.696381 | 4.278221 | 3.014938 |
| 9849  | LOC103245  | 1958.003 | -0.546   | 0.188751  | -2.89271 | 0.003819 | 0.01031  | 1793.764 | 3246.152 | 1932.742 | 1607.131 | 1540.16  | 1628.067 |
| 7803  | LOC1032323 | 472.0061 | -0.54612 | 0.15763   | -3.4646  | 0.000531 | 0.001809 | 517.1504 | 532.6317 | 629.6369 | 428.5684 | 357.2315 | 366.8175 |
| 4333  | CGGBP1     | 6425.444 | -0.54622 | 0.106475  | -5.13003 | 2.90E-07 | 1.78E-06 | 7245.526 | 8613.525 | 7026.887 | 5008.893 | 5193.761 | 5464.073 |
| 4212  | EARS2      | 1367.961 | -0.54645 | 0.104915  | -5.2085  | 1.90E-07 | 1.20E-06 | 1664.747 | 1615.96  | 1596.008 | 1078.117 | 1078.112 | 1174.821 |
| 2926  | SNRPC      | 3825.843 | -0.54647 | 0.083854  | -6.51689 | 7.18E-11 | 6.52E-10 | 4586.647 | 4489.324 | 4586.957 | 3104.889 | 3135.936 | 3089.307 |
| 4563  | COX7A2L    | 4939.665 | -0.54677 | 0.110143  | -4.96413 | 6.90E-07 | 4.02E-06 | 6093.593 | 5069.581 | 6429.254 | 4073.632 | 4068.588 | 3903.34  |
| 4770  | NOL12      | 1546.516 | -0.54685 | 0.113202  | -4.83076 | 1.36E-06 | 7.58E-06 | 1963.979 | 1680.554 | 1865.256 | 1314.723 | 1172.233 | 1282.354 |
| 5068  | NGDN       | 1053.998 | -0.54686 | 0.117624  | -4.6492  | 3.33E-06 | 1.75E-05 | 1314.017 | 1202.116 | 1240.489 | 897.315  | 778.6363 | 891.4168 |
| 14682 | LOC103245  | 87.12742 | -0.54688 | 0.288983  | -1.89242 | 0.058435 | 0.10581  | 116.5486 | 91.41777 | 102.9682 | 64.73168 | 72.72976 | 74.36848 |
| 23856 | TRNAR-AC   | 3.993993 | -0.54702 | 1.274357  | -0.42925 | 0.667742 | 0.744128 | 5.420864 | 2.189647 | 6.957314 | 2.232127 | 2.139111 | 5.024897 |
| 15808 | HES2       | 74.98833 | -0.5473  | 0.322017  | -1.69958 | 0.089209 | 0.150027 | 103.5385 | 78.8273  | 84.1835  | 75.89232 | 49.19955 | 58.28881 |
| 3911  | COL6A2     | 21144.22 | -0.54753 | 0.100711  | -5.4367  | 5.43E-08 | 3.69E-07 | 25594.61 | 23307.15 | 26432.92 | 17548.98 | 15467.91 | 18513.73 |
| 22601 | LOC103245  | 8.579128 | -0.5476  | 0.877453  | -0.62408 | 0.532572 | 0.626451 | 8.131296 | 11.49565 | 10.43597 | 6.696381 | 10.69555 | 4.019918 |
| 21728 | LOC119621  | 14.03713 | -0.54773 | 0.707923  | -0.77371 | 0.439101 | 0.537256 | 20.59928 | 18.612   | 11.1317  | 13.39276 | 6.417332 | 14.06971 |
| 3088  | BIVM       | 7358.637 | -0.54775 | 0.087043  | -6.29288 | 3.12E-10 | 2.68E-09 | 8722.17  | 9211.846 | 8286.161 | 5874.958 | 5908.224 | 6148.464 |
| 6496  | BCDIN3D    | 868.7646 | -0.54787 | 0.138998  | -3.94161 | 8.09E-05 | 0.000331 | 1123.745 | 979.8671 | 995.5916 | 747.7625 | 596.8119 | 768.8093 |
| 16412 | LOC103245  | 63.15854 | -0.54788 | 0.345287  | -1.58675 | 0.112569 | 0.182344 | 76.43418 | 77.18507 | 70.26887 | 69.19594 | 40.6431  | 45.22408 |
| 6217  | PA2G4      | 7239.317 | -0.54791 | 0.134718  | -4.06705 | 4.76E-05 | 0.000204 | 7637.997 | 10593.51 | 7563.296 | 5953.083 | 5544.575 | 6143.439 |
| 23905 | LOC103245  | 3.848906 | -0.54792 | 1.298419  | -0.42199 | 0.673032 | 0.748486 | 3.252518 | 3.831883 | 6.261582 | 4.464254 | 4.278221 | 1.004979 |
| 4940  | ZNF23      | 1442.395 | -0.54793 | 0.11612   | -4.71864 | 2.37E-06 | 1.28E-05 | 1660.953 | 1894.592 | 1582.789 | 1223.206 | 1123.033 | 1169.796 |
| 23816 | LOC119618  | 3.895468 | -0.5481  | 1.260675  | -0.43477 | 0.663732 | 0.740916 | 3.252518 | 7.116354 | 3.478657 | 2.232127 | 4.278221 | 3.014938 |
| 3999  | XPO5       | 5484.492 | -0.54816 | 0.101988  | -5.37475 | 7.67E-08 | 5.10E-07 | 6804.81  | 6241.042 | 6506.48  | 4091.489 | 4331.699 | 4931.434 |
| 6346  | LOC1032323 | 593.1159 | -0.54817 | 0.13678   | -4.00771 | 6.13E-05 | 0.000257 | 712.8436 | 746.6697 | 652.596  | 457.586  | 517.6648 | 471.3354 |
| 22205 | LOC119615  | 14.34859 | -0.54831 | 0.792851  | -0.69157 | 0.489206 | 0.585704 | 8.131296 | 33.39212 | 9.740239 | 8.928508 | 12.83466 | 13.06473 |
| 4844  | EXOC3      | 2245.436 | -0.54849 | 0.114586  | -4.78673 | 1.70E-06 | 9.30E-06 | 2558.648 | 2809.865 | 2642.388 | 1749.988 | 1653.533 | 2058.198 |
| 24926 | LOC1032323 | 1.752184 | -0.54859 | 2.11395   | -0.25951 | 0.795243 | 0.848172 | 0        | 2.189647 | 4.174388 | 0        | 2.139111 | 2.009959 |
| 3687  | EXOSC2     | 2078.974 | -0.54863 | 0.097047  | -5.65319 | 1.57E-08 | 1.14E-07 | 2520.16  | 2496.198 | 2395.403 | 1716.506 | 1597.916 | 1747.659 |
| 4422  | SLC19A2    | 1405.198 | -0.54868 | 0.108369  | -5.06306 | 4.13E-07 | 2.48E-06 | 1746.06  | 1573.262 | 1691.323 | 1160.706 | 1075.973 | 1183.866 |
| 3419  | SRSF10     | 4991.162 | -0.54877 | 0.092609  | -5.92573 | 3.11E-09 | 2.42E-08 | 5773.762 | 6363.662 | 5648.643 | 3953.097 | 4196.935 | 4010.873 |
| 8560  | LOC103222  | 278.951  | -0.54902 | 0.169535  | -3.23841 | 0.001202 | 0.003733 | 340.9723 | 323.5204 | 329.0809 | 238.8376 | 218.1893 | 323.1054 |
| 24385 | CLDN19     | 3.104146 | -0.54912 | 1.575362  | -0.34857 | 0.727415 | 0.79301  | 6.263691 | 0.547412 | 6.261582 | 4.464254 | 0        | 3.014938 |
| 19460 | LOC119621  | 31.20972 | -0.54914 | 0.495521  | -1.10821 | 0.767771 | 0.365812 | 35.23561 | 27.37059 | 48.00546 | 22.32127 | 34.22577 | 20.09959 |
| 5329  | ARHGEF1    | 1958.052 | -0.54919 | 0.121946  | -4.50351 | 6.68E-06 | 3.33E-05 | 2516.365 | 2054.437 | 2414.884 | 1517.846 | 1493.099 | 1751.679 |
| 5473  | ICE1       | 6137.187 | -0.54927 | 0.124086  | -4.42656 | 9.57E-06 | 4.65E-05 | 6731.629 | 8663.339 | 6482.129 | 5040.143 | 4673.957 | 5231.923 |
| 3158  | GLS        | 24464.13 | -0.54934 | 0.088487  | -6.20811 | 5.36E-10 | 4.51E-09 | 30696.18 | 27430.81 | 29078.79 | 18952.99 | 19686.24 | 20939.75 |
| 13004 | LOC119621  | 347.5545 | -0.54941 | 0.249387  | -2.20306 | 0.027591 | 0.056406 | 440.7162 | 261.6628 | 534.3217 | 296.8729 | 316.5884 | 235.1652 |
| 3797  | CNN2       | 3086.807 | -0.54976 | 0.099078  | -5.54876 | 2.88E-08 | 2.01E-07 | 3740.938 | 3698.314 | 3573.276 | 2395.072 | 2378.691 | 2734.549 |
| 11148 | MEX3A      | 237.9305 | -0.54983 | 0.212088  | -2.59245 | 0.009529 | 0.022725 | 243.9389 | 327.8997 | 276.2054 | 160.7131 | 228.8848 | 189.9411 |
| 4153  | PAFAH1B2   | 7806.339 | -0.54994 | 0.104649  | -5.25512 | 1.48E-07 | 9.47E-07 | 9016.523 | 10437.5  | 8377.301 | 6270.045 | 6201.282 | 6535.381 |
| 12221 | LOC103245  | 139.8413 | -0.55014 | 0.232882  | -2.36231 | 0.018161 | 0.039507 | 150.7    | 172.9821 | 176.02   | 116.0706 | 102.6773 | 120.5975 |
| 4186  | TAF6       | 2621.395 | -0.55032 | 0.105108  | -5.23575 | 1.64E-07 | 1.04E-06 | 3139.764 | 3041.967 | 3173.927 | 2051.325 | 1963.704 | 2357.682 |
| 9018  | TEDC2      | 490.2068 | -0.55039 | 0.176931  | -3.11076 | 0.001866 | 0.005501 | 642.9144 | 460.9207 | 647.0302 | 386.158  | 370.0661 | 434.1511 |
| 24543 | LOC119621  | 2.207799 | -0.55046 | 1.700651  | -0.32368 | 0.746184 | 0.808165 | 1.626259 | 4.379295 | 2.087194 | 0        | 2.139111 | 3.014938 |
| 4326  | UFM1       | 1494.94  | -0.55054 | 0.107238  | -5.1338  | 2.84E-07 | 1.75E-06 | 1717.872 | 1712.852 | 1896.564 | 1267.848 | 1210.737 | 1163.766 |
| 22419 | LOC103215  | 9.238004 | -0.55063 | 0.842322  | -0.65371 | 0.5133   | 0.608684 | 10.29964 | 7.663765 | 15.30609 | 6.696381 | 6.417332 | 9.044815 |
| 4420  | QSOX2      | 2787.368 | -0.55073 | 0.108715  | -5.06582 | 4.07E-07 | 2.45E-06 | 3468.811 | 3147.071 | 3331.858 | 2216.502 | 2053.546 | 2506.419 |
| 6946  | NFIX       | 748.3702 | -0.55077 | 0.146545  | -3.7584  | 0.000171 | 0.000655 | 778.9781 | 1030.229 | 859.2282 | 640.6204 | 571.1425 | 610.0225 |
| 19705 | LOC119621  | 26.57093 | -0.55088 | 0.515269  | -1.06911 | 0.285022 | 0.384537 | 26.02015 | 42.15071 | 26.43779 | 22.32127 | 21.39111 | 21.10457 |
| 4449  | RASA3      | 3120.959 | -0.55095 | 0.109235  | -5.04377 | 4.56E-07 | 2.73E-06 | 3559.881 | 4117.632 | 3456.393 | 2520.071 | 2374.413 | 2697.365 |
| 3932  | PRKRA      | 1976.385 | -0.55099 | 0.101699  | -5.41787 | 6.03E-08 | 4.08E-07 | 2413.369 | 2287.087 | 2342.528 | 1571.417 | 1728.401 | 1515.509 |
| 6481  | GILR1      | 496.2666 | -0.55108 | 0.139622  | -3.94695 | 7.92E-05 | 0.000325 | 583.2849 | 612.5538 | 576.0656 | 372.7652 | 412.8484 | 420.0814 |
| 3892  | MCM7       | 13335.59 | -0.5514  | 0.10116   | -5.45074 | 5.0      |          |          |          |          |          |          |          |



|       |           |          |          |          |          |          |          |          |          |          |          |          |          |
|-------|-----------|----------|----------|----------|----------|----------|----------|----------|----------|----------|----------|----------|----------|
| 5799  | LOC103235 | 1300.588 | -0.55176 | 0.1291   | -4.2739  | 1.92E-05 | 8.81E-05 | 1708.656 | 1351.012 | 1584.18  | 995.5286 | 1022.495 | 1141.657 |
| 26593 | TRNAN-GL  | 0.23191  | -0.5519  | 4.021063 | -0.13725 | 0.890831 | NA       | 0        | 0        | 1.391463 | 0        | 0        | 0        |
| 26661 | LOC119618 | 0.23191  | -0.5519  | 4.021063 | -0.13725 | 0.890831 | NA       | 0        | 0        | 1.391463 | 0        | 0        | 0        |
| 26682 | SPINK9    | 0.23191  | -0.5519  | 4.021063 | -0.13725 | 0.890831 | NA       | 0        | 0        | 1.391463 | 0        | 0        | 0        |
| 26694 | DCANP1    | 0.23191  | -0.5519  | 4.021063 | -0.13725 | 0.890831 | NA       | 0        | 0        | 1.391463 | 0        | 0        | 0        |
| 26743 | LOC119619 | 0.23191  | -0.5519  | 4.021063 | -0.13725 | 0.890831 | NA       | 0        | 0        | 1.391463 | 0        | 0        | 0        |
| 26860 | MYF5      | 0.23191  | -0.5519  | 4.021063 | -0.13725 | 0.890831 | NA       | 0        | 0        | 1.391463 | 0        | 0        | 0        |
| 27283 | LOC119625 | 0.23191  | -0.5519  | 4.021063 | -0.13725 | 0.890831 | NA       | 0        | 0        | 1.391463 | 0        | 0        | 0        |
| 27693 | CRISP1    | 0.23191  | -0.5519  | 4.021063 | -0.13725 | 0.890831 | NA       | 0        | 0        | 1.391463 | 0        | 0        | 0        |
| 27837 | LOC119627 | 0.23191  | -0.5519  | 4.021063 | -0.13725 | 0.890831 | NA       | 0        | 0        | 1.391463 | 0        | 0        | 0        |
| 27903 | LOC103246 | 0.23191  | -0.5519  | 4.021063 | -0.13725 | 0.890831 | NA       | 0        | 0        | 1.391463 | 0        | 0        | 0        |
| 27952 | LOC103216 | 0.23191  | -0.5519  | 4.021063 | -0.13725 | 0.890831 | NA       | 0        | 0        | 1.391463 | 0        | 0        | 0        |
| 28079 | LOC103244 | 0.23191  | -0.5519  | 4.021063 | -0.13725 | 0.890831 | NA       | 0        | 0        | 1.391463 | 0        | 0        | 0        |
| 28342 | LOC119619 | 0.23191  | -0.5519  | 4.021063 | -0.13725 | 0.890831 | NA       | 0        | 0        | 1.391463 | 0        | 0        | 0        |
| 28497 | MAB21L1   | 0.23191  | -0.5519  | 4.021063 | -0.13725 | 0.890831 | NA       | 0        | 0        | 1.391463 | 0        | 0        | 0        |
| 28556 | LOC103235 | 0.23191  | -0.5519  | 4.021063 | -0.13725 | 0.890831 | NA       | 0        | 0        | 1.391463 | 0        | 0        | 0        |
| 28560 | LOC119620 | 0.23191  | -0.5519  | 4.021063 | -0.13725 | 0.890831 | NA       | 0        | 0        | 1.391463 | 0        | 0        | 0        |
| 28598 | LOC119620 | 0.23191  | -0.5519  | 4.021063 | -0.13725 | 0.890831 | NA       | 0        | 0        | 1.391463 | 0        | 0        | 0        |
| 28680 | LOC119620 | 0.23191  | -0.5519  | 4.021063 | -0.13725 | 0.890831 | NA       | 0        | 0        | 1.391463 | 0        | 0        | 0        |
| 28797 | LOC119625 | 0.23191  | -0.5519  | 4.021063 | -0.13725 | 0.890831 | NA       | 0        | 0        | 1.391463 | 0        | 0        | 0        |
| 28899 | LOC119625 | 0.23191  | -0.5519  | 4.021063 | -0.13725 | 0.890831 | NA       | 0        | 0        | 1.391463 | 0        | 0        | 0        |
| 28969 | LOC103234 | 0.23191  | -0.5519  | 4.021063 | -0.13725 | 0.890831 | NA       | 0        | 0        | 1.391463 | 0        | 0        | 0        |
| 29134 | LOC103245 | 0.23191  | -0.5519  | 4.021063 | -0.13725 | 0.890831 | NA       | 0        | 0        | 1.391463 | 0        | 0        | 0        |
| 4651  | TMSB10    | 41715.73 | -0.55193 | 0.112252 | -4.9169  | 8.79E-07 | 5.03E-06 | 51185.42 | 41847.99 | 55764.26 | 34334.58 | 33928.43 | 33233.67 |
| 21440 | LOC103225 | 13.53577 | -0.552   | 0.679304 | -0.81259 | 0.41645  | 0.516387 | 14.63633 | 16.96977 | 16.69755 | 11.16063 | 10.69555 | 11.05477 |
| 5938  | NDUF56    | 2721.708 | -0.55234 | 0.131799 | -4.1908  | 2.78E-05 | 0.000124 | 3535.487 | 2635.788 | 3536.403 | 2361.59  | 2128.415 | 2132.566 |
| 3650  | IMPACT    | 2362.201 | -0.55243 | 0.096939 | -5.69874 | 1.21E-08 | 8.79E-08 | 2967.923 | 2727.206 | 2735.616 | 1859.362 | 1895.252 | 1987.849 |
| 8046  | TMCC2     | 365.9036 | -0.55301 | 0.162616 | -3.40072 | 0.000672 | 0.002221 | 459.1472 | 400.158  | 449.4425 | 292.4086 | 271.6671 | 322.5984 |
| 8677  | LOC119618 | 348.6181 | -0.55306 | 0.172323 | -3.20943 | 0.00133  | 0.004075 | 464.568  | 360.7444 | 419.526  | 290.1765 | 265.2497 | 291.444  |
| 5499  | METTL26   | 1506.605 | -0.55326 | 0.12546  | -4.4099  | 1.03E-05 | 5.00E-05 | 1814.905 | 1670.153 | 1900.042 | 1149.545 | 1108.059 | 1396.921 |
| 8473  | SERF1A    | 426.4828 | -0.55333 | 0.169661 | -3.26138 | 0.001109 | 0.003479 | 460.2313 | 485.0069 | 573.9784 | 328.1227 | 400.0137 | 311.5436 |
| 24225 | LOC119624 | 3.381894 | -0.55339 | 1.493594 | -0.37051 | 0.711005 | 0.780264 | 4.878777 | 3.284471 | 3.478657 | 2.232127 | 6.417332 | 0        |
| 21488 | LOC103236 | 15.78615 | -0.55347 | 0.686374 | -0.80637 | 0.420032 | 0.519664 | 16.80468 | 22.9913  | 17.39328 | 4.464254 | 14.97377 | 18.08963 |
| 24938 | TRNAC-GC  | 1.314402 | -0.5536  | 2.156221 | -0.25674 | 0.797376 | 0.850038 | 2.710432 | 0.547412 | 1.391463 | 2.232127 | 0        | 1.004979 |
| 7605  | LOC103225 | 15463.13 | -0.55372 | 0.157121 | -3.52419 | 0.000425 | 0.001485 | 15534.03 | 24382.82 | 15267.13 | 12506.61 | 12415.4  | 12672.79 |
| 20801 | LOC119619 | 18.58193 | -0.55384 | 0.612419 | -0.90435 | 0.365809 | 0.467528 | 22.22554 | 23.53871 | 19.48048 | 20.08914 | 17.11289 | 9.044815 |
| 4178  | LARS2     | 3539.185 | -0.55386 | 0.105643 | -5.24279 | 1.58E-07 | 1.01E-06 | 4272.183 | 4267.623 | 4101.336 | 2752.213 | 2626.828 | 3214.929 |
| 6460  | HAUS6     | 2841.718 | -0.55406 | 0.140018 | -3.95703 | 7.59E-05 | 0.000312 | 3067.667 | 4179.489 | 2894.938 | 2263.377 | 2327.352 | 2317.483 |
| 7575  | CLSPN     | 2734.305 | -0.55439 | 0.156881 | -3.53381 | 0.00041  | 0.001438 | 2854.627 | 4199.743 | 2707.091 | 2174.092 | 2132.693 | 2337.582 |
| 7059  | PITX2     | 561.5992 | -0.5544  | 0.149532 | -3.7076  | 0.000209 | 0.000788 | 615.268  | 760.355  | 628.9412 | 426.3363 | 483.439  | 455.2557 |
| 3570  | NCS1      | 4190.716 | -0.55448 | 0.095893 | -5.78233 | 7.37E-09 | 5.49E-08 | 5054.413 | 4924.517 | 4988.394 | 3363.815 | 3135.936 | 3677.22  |
| 3109  | SINHCAF   | 5568.246 | -0.55459 | 0.088451 | -6.27001 | 3.61E-10 | 3.09E-09 | 6898.591 | 6467.123 | 6516.22  | 4506.664 | 4297.473 | 4723.404 |
| 19500 | DCLK3     | 35.11061 | -0.55494 | 0.504027 | -1.10101 | 0.270893 | 0.369299 | 42.82482 | 44.88777 | 35.4823  | 40.17829 | 34.22577 | 13.06473 |
| 4177  | TCFL5     | 1633.768 | -0.55506 | 0.105868 | -5.24291 | 1.58E-07 | 1.01E-06 | 1982.952 | 1992.032 | 1863.864 | 1270.08  | 1270.632 | 1423.051 |
| 12582 | LOC103245 | 177.2299 | -0.5555  | 0.242803 | -2.28788 | 0.022145 | 0.04679  | 232.5551 | 163.6761 | 239.3316 | 127.2312 | 134.764  | 165.8216 |
| 3997  | RPL35A    | 16280.22 | -0.55561 | 0.103342 | -5.37636 | 7.60E-08 | 5.06E-07 | 20544.53 | 16850.98 | 20733.49 | 13461.96 | 13234.68 | 12855.7  |
| 5583  | EDEM2     | 2154.077 | -0.55564 | 0.126848 | -4.38034 | 1.18E-05 | 5.64E-05 | 2848.664 | 2216.47  | 2632.648 | 1678.559 | 1623.585 | 1924.536 |
| 5035  | CARS2     | 1998.788 | -0.55567 | 0.118968 | -4.67076 | 3.00E-06 | 1.58E-05 | 2591.173 | 2179.794 | 2373.14  | 1587.042 | 1471.708 | 1789.868 |
| 5620  | ENTPD3    | 884.8967 | -0.55615 | 0.127475 | -4.36287 | 1.28E-05 | 6.07E-05 | 1009.365 | 1127.121 | 1029.682 | 676.3345 | 675.959  | 790.9188 |
| 23299 | CLDN22    | 6.008379 | -0.55645 | 1.081798 | -0.51438 | 0.606989 | 0.692597 | 7.047123 | 10.40082 | 3.478657 | 6.696381 | 6.417332 | 2.009959 |
| 21777 | LOC119628 | 12.96757 | -0.5566  | 0.72914  | -0.76336 | 0.445249 | 0.543553 | 15.7205  | 19.70683 | 10.43597 | 8.928508 | 14.97377 | 8.039836 |
| 4666  | FADS3     | 6335.662 | -0.55662 | 0.11345  | -4.90627 | 9.28E-07 | 5.29E-06 | 8042.393 | 6919.285 | 7676.004 | 5098.178 | 4530.636 | 5747.478 |
| 5024  | ATG12     | 2922.444 | -0.55663 | 0.119035 | -4.67622 | 2.92E-06 | 1.55E-05 | 3762.621 | 2934.127 | 3740.948 | 2388.376 | 2367.996 | 2340.597 |
| 4488  | CENPO     | 1189.234 | -0.55684 | 0.110986 | -5.01718 | 5.24E-07 | 3.11E-06 | 1381.236 | 1396.448 | 1475.646 | 933.0291 | 921.9567 | 1027.089 |
| 21519 | LOC103236 | 13.7038  | -0.55685 | 0.694809 | -0.80145 | 0.422873 | 0.522426 | 17.88885 | 13.6853  | 18.08902 | 8.928508 | 8.556443 | 15.07469 |
| 8732  | HSCB      | 396.3128 | -0.55686 | 0.174397 | -3.19306 | 0.001408 | 0.004286 | 457.5209 | 427.5286 | 525.9729 | 339.2833 | 257.2315 | 270.3395 |
| 5242  | MPHOSPH   | 3105.422 | -0.55702 | 0.1222   | -4.5583  | 5.16E-06 | 2.62E-05 | 3405.929 | 4336.596 | 3352.729 | 2439.715 | 2468.534 | 2629.026 |
| 7906  | ARMC2     | 377.3543 | -0.55711 | 0.162135 | -3.43609 | 0.00059  | 0.001985 | 422.8274 | 491.0284 | 436.9193 | 274.5516 | 310.171  | 328.6283 |
| 20086 | LOC103236 | 23.46256 | -0.55727 | 0.548992 | -1.01507 | 0.310073 | 0.410399 | 27.6464  | 21.34906 | 34.09084 | 20.08914 | 23.53022 | 14.06971 |
| 7045  | SYNC      | 627.9779 | -0.55728 | 0.150024 | -3.71457 | 0.000204 | 0.000768 | 712.8436 | 850.1305 | 684.5997 | 466.5145 | 491.9955 | 561.7835 |
| 3198  | CUL4A     | 5068.635 | -0.55728 | 0.090424 | -6.16303 | 7.14E-10 | 5.93E-09 | 6110.398 | 6244.874 | 5757.177 | 3908.454 | 4083.562 | 4307.342 |
| 17317 | LOC119620 | 186.6593 | -0.5573  | 0.385436 | -1.44589 | 0.148208 | 0.227529 | 297.0633 | 88.1333  | 283.8584 | 145.0883 | 104.8164 | 200.9959 |
| 3572  | ACACA     | 12520.39 | -0.55731 | 0.096419 | -5.78005 | 7.47E-09 | 5.56E-08 | 14926.89 | 15322.06 | 14488.61 | 9870.466 | 9332.94  | 11181.4  |
| 12999 | HS3ST5    | 113.0134 | -0.5574  | 0.252951 | -2.20357 | 0.027554 | 0.056353 | 129.5586 | 146.159  | 128.7103 | 93.74933 | 83.42532 | 96.47803 |
| 3693  | POLE      | 5181.791 | -0.55759 | 0.09874  | -5.6471  | 1.63E-08 | 1.17E-07 | 6316.39  | 6020.983 | 6185.748 | 3999.972 | 3931.685 | 4635.97  |
| 22363 | LOC103225 | 13.14452 | -0.55785 | 0.839364 | -0.66461 | 0.506297 | 0.601883 | 22.76763 | 5.474118 | 18.08902 | 20.08914 | 6.417332 | 6.029877 |
| 21560 | LOC119625 | 15.55697 | -0.55787 | 0.701661 | -0.79507 | 0.426572 | 0.525993 | 16.80468 | 25.18094 | 13.2189  | 6.696381 | 21.39111 | 10.04979 |
| 7985  | IFI6      | 480.8941 | -0.558   | 0.163321 | -3.4166  | 0.000634 | 0.002111 | 504.1403 | 672.2217 | 541.9747 | 404.015  | 370.0661 | 392.947  |
| 6538  | LOC103244 | 2115.411 | -0.55808 | 0.142191 | -3.92487 | 8.68E-05 | 0.000353 | 2304.951 | 3008.575 | 2250.691 | 1662.935 | 1533.742 | 1931.571 |
| 6686  | LOC103235 | 898.977  | -0.55837 | 0.144548 | -3.86287 | 0.000112 | 0.000446 | 1016.412 | 1236.056 | 964.2837 | 714.2806 | 658.8461 | 803.9836 |
| 5812  | TBC1D22A  | 828.7242 | -0.55865 | 0.130917 | -4.26722 | 1.98E-05 | 9.05E-05 | 1044.058 | 993.5524 | 928.1056 | 687.4951 | 592.5337 | 726.6002 |
| 5627  | DBAF10    | 814.4795 | -0.55877 | 0.128141 | -4.3606  | 1.30E-05 | 6.13E-05 | 1024.001 | 905.4191 | 986.5471 | 636.1562 | 618.203  | 716.5504 |
| 4339  | GCN1      | 15495.05 | -0.55886 | 0.109007 | -5.12681 | 2.95E-07 | 1.81E-06 | 19328.09 | 17681.95 | 18379.14 | 12080.27 | 11176.85 | 14323.97 |
| 13072 | FAM78B    | 128.9523 | -0.55886 | 0.254883 | -2.19261 | 0.028335 | 0.057627 | 142.0266 | 159.2968 | 156.5396 | 109.3742 | 124.0684 | 82.40832 |



|       |           |          |          |          |          |          |          |          |          |          |          |          |          |
|-------|-----------|----------|----------|----------|----------|----------|----------|----------|----------|----------|----------|----------|----------|
| 5779  | MRPS33    | 2897.358 | -0.55929 | 0.130528 | -4.28483 | 1.83E-05 | 8.41E-05 | 3741.48  | 2813.697 | 3797.998 | 2441.947 | 2385.108 | 2203.92  |
| 4802  | DCAF17    | 916.8211 | -0.5593  | 0.116234 | -4.81189 | 1.50E-06 | 8.28E-06 | 1130.792 | 1084.97  | 1057.512 | 745.5304 | 778.6363 | 703.4856 |
| 5545  | SLC38A10  | 5164.579 | -0.55935 | 0.127323 | -4.3932  | 1.12E-05 | 5.36E-05 | 6727.834 | 5253.511 | 6486.999 | 4035.686 | 3752     | 4731.443 |
| 5691  | LOC103227 | 615.4933 | -0.55973 | 0.129239 | -4.33096 | 1.48E-05 | 6.93E-05 | 704.7123 | 762.5447 | 731.2137 | 493.3001 | 519.8039 | 481.3852 |
| 3472  | RNF220    | 3524.918 | -0.55982 | 0.095099 | -5.88668 | 3.94E-09 | 3.02E-08 | 4069.442 | 4458.669 | 4078.377 | 2792.391 | 2748.757 | 3001.874 |
| 11814 | LOC103235 | 138.3998 | -0.55987 | 0.228914 | -2.44577 | 0.014454 | 0.032526 | 153.4104 | 172.4347 | 169.0627 | 113.8385 | 109.0946 | 112.5577 |
| 4401  | MBTD1     | 1791.165 | -0.55993 | 0.110207 | -5.08071 | 3.76E-07 | 2.27E-06 | 2235.022 | 2178.699 | 1996.053 | 1348.205 | 1418.23  | 1570.783 |
| 22568 | LOC119618 | 9.055453 | -0.56014 | 0.889198 | -0.62994 | 0.528732 | 0.622844 | 14.09425 | 9.853413 | 7.653045 | 11.16063 | 8.556443 | 3.014938 |
| 23559 | LOC119625 | 4.853465 | -0.56031 | 1.17888  | -0.47529 | 0.634583 | 0.716078 | 7.047123 | 2.189647 | 8.348776 | 2.232127 | 4.278221 | 5.024897 |
| 15407 | CHCHD2    | 13890.22 | -0.5604  | 0.318609 | -1.7589  | 0.078595 | 0.135607 | 20401.42 | 9410.556 | 19852.69 | 11064.65 | 10419.61 | 12192.41 |
| 4750  | PARN      | 2233.735 | -0.56053 | 0.115678 | -4.84556 | 1.26E-06 | 7.07E-06 | 2508.776 | 3029.377 | 2447.583 | 1763.38  | 1867.444 | 1785.849 |
| 4379  | BCAP29    | 1343.703 | -0.56076 | 0.110083 | -5.09397 | 3.51E-07 | 2.13E-06 | 1517.3   | 1714.494 | 1575.832 | 1037.939 | 1093.086 | 1123.567 |
| 13727 | TRIM36    | 116.8664 | -0.56093 | 0.271618 | -2.06516 | 0.038908 | 0.075347 | 142.0266 | 156.5598 | 120.3615 | 107.1421 | 70.59065 | 104.5179 |
| 16065 | LOC103225 | 70.86202 | -0.56142 | 0.339478 | -1.65377 | 0.098174 | 0.162452 | 66.13454 | 107.8401 | 79.31338 | 53.57105 | 62.03421 | 56.27885 |
| 20786 | LOC119615 | 22.14784 | -0.56147 | 0.619346 | -0.90655 | 0.364646 | 0.466388 | 24.93597 | 16.96977 | 36.17803 | 20.08914 | 25.66933 | 9.044815 |
| 3793  | SEN3      | 3274.13  | -0.56148 | 0.101133 | -5.55194 | 2.83E-08 | 1.98E-07 | 4094.378 | 3637.552 | 3981.671 | 2738.82  | 2440.725 | 2751.634 |
| 9401  | TMEM256   | 1023.44  | -0.5615  | 0.186729 | -3.00707 | 0.002638 | 0.00746  | 1412.677 | 846.8461 | 1402.594 | 866.0653 | 740.1323 | 872.3222 |
| 5644  | GDF9      | 978.0981 | -0.56158 | 0.129114 | -4.34946 | 1.36E-05 | 6.43E-05 | 1174.701 | 1236.603 | 1089.515 | 845.9761 | 686.6545 | 835.1379 |
| 2883  | TNPO1     | 12795.02 | -0.56161 | 0.085468 | -6.57097 | 5.00E-11 | 4.61E-10 | 15345.92 | 15763.27 | 14661.15 | 10102.61 | 9981.09  | 10916.09 |
| 8303  | LOC103235 | 898.4744 | -0.56162 | 0.16957  | -3.31202 | 0.000926 | 0.002966 | 1196.385 | 801.4109 | 1217.53  | 674.1023 | 748.6887 | 752.7296 |
| 7371  | EPC2      | 1711.98  | -0.56184 | 0.155669 | -3.60917 | 0.000307 | 0.001108 | 1737.387 | 2595.279 | 1789.421 | 1437.49  | 1362.613 | 1349.687 |
| 3586  | ME2       | 3071.569 | -0.56197 | 0.097495 | -5.76412 | 8.21E-09 | 6.09E-08 | 3555.544 | 3929.869 | 3503.007 | 2368.287 | 2556.237 | 2516.469 |
| 4362  | BBS1      | 1076.971 | -0.5622  | 0.110106 | -5.106   | 3.29E-07 | 2.01E-06 | 1234.331 | 1320.905 | 1300.322 | 843.744  | 862.0616 | 900.4616 |
| 18113 | HOXA13    | 43.06852 | -0.56222 | 0.426276 | -1.31892 | 0.187197 | 0.274755 | 40.65648 | 53.64636 | 58.44144 | 33.4819  | 47.06043 | 25.12449 |
| 5320  | RAD51     | 765.567  | -0.5624  | 0.124736 | -4.50872 | 6.52E-06 | 3.26E-05 | 964.3717 | 858.3417 | 916.9739 | 640.6204 | 583.9772 | 629.1171 |
| 5568  | PDE6D     | 1229.98  | -0.5624  | 0.128226 | -4.38605 | 1.15E-05 | 5.51E-05 | 1363.889 | 1613.223 | 1418.596 | 950.8861 | 1118.755 | 914.5313 |
| 5028  | RNF126    | 844.6669 | -0.56249 | 0.120353 | -4.67368 | 2.96E-06 | 1.56E-05 | 956.2404 | 1018.186 | 1049.163 | 705.3521 | 639.5941 | 699.4657 |
| 10536 | SH3YL1    | 189.007  | -0.5625  | 0.205465 | -2.7377  | 0.006187 | 0.015612 | 226.5921 | 226.0811 | 226.1127 | 151.7846 | 132.6249 | 170.8465 |
| 8652  | LOC119625 | 437.9117 | -0.56271 | 0.175028 | -3.21499 | 0.001304 | 0.004008 | 572.4432 | 416.5804 | 578.1528 | 350.4439 | 355.0924 | 354.7578 |
| 5261  | CUNH1orf  | 749.0918 | -0.56273 | 0.123772 | -4.54649 | 5.45E-06 | 2.76E-05 | 944.8565 | 870.3848 | 862.7069 | 636.1562 | 592.5337 | 587.913  |
| 9586  | LOC103225 | 247.9893 | -0.56279 | 0.189859 | -2.96427 | 0.003034 | 0.008414 | 329.5885 | 284.6541 | 274.8139 | 203.1236 | 179.6853 | 216.0706 |
| 9798  | LOC119625 | 203.0076 | -0.56294 | 0.193783 | -2.905   | 0.003673 | 0.009964 | 232.013  | 249.0724 | 244.8974 | 174.1059 | 156.1551 | 161.8017 |
| 13094 | LOC103225 | 258.7782 | -0.56302 | 0.252774 | -2.18842 | 0.028639 | 0.058146 | 371.3292 | 196.5208 | 360.3888 | 183.0344 | 203.2155 | 238.1801 |
| 6105  | RAB5C     | 5537.91  | -0.56304 | 0.136687 | -4.11922 | 3.80E-05 | 0.000166 | 5781.893 | 8185.449 | 5849.014 | 4486.575 | 4299.612 | 4624.196 |
| 4168  | FRYL      | 6509.81  | -0.56312 | 0.107333 | -5.24651 | 1.55E-07 | 9.89E-07 | 7430.92  | 8707.132 | 7160.467 | 5145.053 | 4988.406 | 5626.88  |
| 4627  | LOC103225 | 1263.802 | -0.5632  | 0.114213 | -4.93112 | 8.18E-07 | 4.70E-06 | 1554.704 | 1555.197 | 1417.901 | 964.2789 | 988.2691 | 1102.462 |
| 4691  | LIAS      | 960.0545 | -0.56326 | 0.115206 | -4.88919 | 1.01E-06 | 5.74E-06 | 1217.526 | 1109.056 | 1107.604 | 792.4051 | 767.9407 | 765.7944 |
| 3918  | NUDT4     | 6109.365 | -0.56329 | 0.103704 | -5.43171 | 5.58E-08 | 3.79E-07 | 6870.403 | 8211.725 | 6780.598 | 4843.716 | 4917.815 | 5031.932 |
| 18505 | LOC119624 | 44.77999 | -0.56337 | 0.450317 | -1.25105 | 0.210915 | 0.303008 | 46.61943 | 53.09895 | 59.8329  | 20.08914 | 59.8951  | 29.1444  |
| 4389  | SLC1A5    | 5440.732 | -0.56395 | 0.11088  | -5.08617 | 3.65E-07 | 2.21E-06 | 6921.359 | 5881.94  | 6677.63  | 4305.773 | 3991.581 | 4866.111 |
| 17894 | LOC103245 | 45.33472 | -0.56412 | 0.414161 | -1.36208 | 0.173174 | 0.25727  | 41.74065 | 65.68942 | 53.57132 | 37.94616 | 44.92132 | 28.13943 |
| 8010  | DCTPP1    | 2113.903 | -0.56417 | 0.165497 | -3.40896 | 0.000652 | 0.002164 | 2882.815 | 1819.049 | 2866.413 | 1756.684 | 1561.551 | 1796.903 |
| 24307 | KCNE2     | 2.656187 | -0.56429 | 1.564292 | -0.36073 | 0.718299 | 0.785629 | 3.794605 | 2.189647 | 3.478657 | 4.464254 | 0        | 2.009959 |
| 3500  | ABCC3     | 27397.84 | -0.56432 | 0.096416 | -5.85301 | 4.83E-09 | 3.67E-08 | 31959.24 | 34296.99 | 31821.36 | 21354.76 | 20539.74 | 24414.97 |
| 5224  | LRRK49    | 758.3159 | -0.56437 | 0.123524 | -4.56892 | 4.90E-06 | 2.49E-05 | 909.0788 | 930.0527 | 878.7087 | 613.8349 | 569.0034 | 649.2167 |
| 20380 | LOC119624 | 21.12893 | -0.56443 | 0.584965 | -0.9649  | 0.334594 | 0.436466 | 27.6464  | 30.65506 | 18.08902 | 11.16063 | 17.11289 | 22.10955 |
| 6327  | IER3      | 6643.864 | -0.56452 | 0.140676 | -4.01292 | 6.00E-05 | 0.000252 | 6836.251 | 9978.77  | 6967.054 | 5424.069 | 5247.238 | 5409.804 |
| 24573 | TRNAE-UU  | 3.101943 | -0.56453 | 1.764498 | -0.31994 | 0.749013 | 0.810331 | 3.794605 | 0        | 7.653045 | 0        | 2.139111 | 5.024897 |
| 15768 | LOC119625 | 74.15798 | -0.56471 | 0.330727 | -1.70747 | 0.087735 | 0.147932 | 84.02339 | 98.53413 | 84.87923 | 62.49956 | 40.6431  | 74.36848 |
| 3928  | TTC27     | 1994.955 | -0.56481 | 0.104157 | -5.4227  | 5.87E-08 | 3.97E-07 | 2473.54  | 2340.733 | 2334.874 | 1513.382 | 1561.551 | 1745.649 |
| 19513 | LOC103238 | 27.20833 | -0.56492 | 0.514137 | -1.09877 | 0.27187  | 0.370365 | 27.10432 | 43.79295 | 26.43779 | 24.5534  | 19.252   | 22.10955 |
| 4686  | NOM1      | 2486.874 | -0.56492 | 0.115465 | -4.89256 | 9.95E-07 | 5.65E-06 | 2849.748 | 3294.324 | 2765.532 | 1868.29  | 1944.452 | 2198.895 |
| 6123  | SIRT3     | 587.9852 | -0.565   | 0.137558 | -4.10737 | 4.00E-05 | 0.000174 | 691.7022 | 729.1525 | 688.7741 | 468.7467 | 429.9612 | 519.5744 |
| 3755  | UBA52     | 29110.05 | -0.56504 | 0.101141 | -5.58663 | 2.32E-08 | 1.64E-07 | 37222.9  | 30951.76 | 36047.93 | 23323.49 | 22167.6  | 24946.61 |
| 16302 | LOC119625 | 55.20971 | -0.56508 | 0.351797 | -1.60627 | 0.108214 | 0.176474 | 63.96619 | 66.78424 | 66.09448 | 53.57105 | 40.6431  | 40.19918 |
| 5962  | PTP4A1    | 7818.679 | -0.56513 | 0.13516  | -4.18119 | 2.90E-05 | 0.000129 | 7645.044 | 11393.28 | 8954.758 | 6368.258 | 6117.857 | 6432.874 |
| 18350 | TIGD3     | 49.05762 | -0.56525 | 0.443932 | -1.27329 | 0.202916 | 0.29398  | 68.30288 | 45.98259 | 61.92009 | 55.80317 | 17.11289 | 45.22408 |
| 9948  | LOC103235 | 271.7274 | -0.56529 | 0.196597 | -2.87538 | 0.004035 | 0.010784 | 339.8882 | 278.6326 | 350.6486 | 238.8376 | 237.4413 | 184.9162 |
| 4884  | ASB3      | 1171.065 | -0.56538 | 0.119014 | -4.75053 | 2.03E-06 | 1.10E-05 | 1464.717 | 1284.228 | 1438.772 | 984.368  | 983.9909 | 870.3122 |
| 10616 | ARMC7     | 227.9084 | -0.56572 | 0.208316 | -2.71568 | 0.006614 | 0.016563 | 298.1475 | 247.9776 | 274.1182 | 174.1059 | 154.016  | 219.0855 |
| 13306 | LOC119625 | 133.9312 | -0.56595 | 0.263765 | -2.14567 | 0.031899 | 0.063734 | 183.2252 | 123.1677 | 174.6286 | 93.74933 | 111.2338 | 117.5826 |
| 12117 | ARID3B    | 149.8025 | -0.56595 | 0.23756  | -2.38237 | 0.017202 | 0.037741 | 177.8043 | 172.4347 | 182.9774 | 147.3204 | 119.7902 | 98.48799 |
| 3985  | FLOT2     | 5768.97  | -0.56601 | 0.105119 | -5.38447 | 7.27E-08 | 4.85E-07 | 6303.38  | 7727.813 | 6631.016 | 4620.503 | 4492.132 | 4838.976 |
| 12513 | LOC119625 | 388.968  | -0.56661 | 0.246475 | -2.29885 | 0.021513 | 0.045707 | 349.6457 | 681.5277 | 361.7803 | 296.8729 | 329.423  | 314.5586 |
| 10554 | LOC103225 | 230.5024 | -0.56662 | 0.207306 | -2.73323 | 0.006272 | 0.015798 | 269.959  | 317.4989 | 238.6359 | 158.481  | 207.4937 | 190.9461 |
| 3462  | LIMS1     | 3390.889 | -0.56669 | 0.096138 | -5.89455 | 3.76E-09 | 2.89E-08 | 3971.325 | 4362.325 | 3812.608 | 2676.32  | 2753.035 | 2769.723 |
| 18201 | LOC119618 | 35.94245 | -0.56671 | 0.435377 | -1.30165 | 0.193034 | 0.281953 | 48.24569 | 41.05589 | 38.65669 | 22.32127 | 34.22577 | 30.14938 |
| 20252 | LOC119625 | 23.11285 | -0.56699 | 0.574486 | -0.98696 | 0.323664 | 0.424877 | 35.23561 | 20.25424 | 27.13352 | 11.16063 | 27.80844 | 17.08465 |
| 9169  | MTG1      | 1504.849 | -0.567   | 0.185157 | -3.06225 | 0.002197 | 0.006369 | 2190.029 | 1231.129 | 1971.007 | 1272.312 | 1080.251 | 1284.364 |
| 6154  | SLAIN2    | 3666.307 | -0.56717 | 0.138513 | -4.09472 | 4.23E-05 | 0.000183 | 3884.049 | 5430.325 | 3818.869 | 2910.694 | 2986.198 | 2967.704 |
| 6632  |           |          |          |          |          |          |          |          |          |          |          |          |          |



|       |           |          |            |          |          |          |          |          |          |          |          |          |          |
|-------|-----------|----------|------------|----------|----------|----------|----------|----------|----------|----------|----------|----------|----------|
| 5496  | CDCA5     | 664.4927 | -0.56773   | 0.128693 | -4.41153 | 1.03E-05 | 4.96E-05 | 759.463  | 836.9927 | 784.785  | 504.4607 | 562.5861 | 538.669  |
| 3864  | PHB       | 5401.138 | -0.56775   | 0.103538 | -5.48349 | 4.17E-08 | 2.87E-07 | 6888.291 | 5765.889 | 6702.676 | 4214.256 | 4226.883 | 4608.836 |
| 11364 | PRELID3A  | 163.045  | -0.56801   | 0.223159 | -2.54531 | 0.010918 | 0.025542 | 184.8515 | 219.5121 | 178.1072 | 136.1597 | 139.0422 | 120.5975 |
| 5085  | DERA      | 1925.578 | -0.56803   | 0.122409 | -4.64045 | 3.48E-06 | 1.82E-05 | 2425.837 | 1956.45  | 2519.243 | 1533.471 | 1531.603 | 1586.863 |
| 8539  | LOC119625 | 257.7311 | -0.56808   | 0.175136 | -3.24362 | 0.00118  | 0.003674 | 303.0263 | 298.3394 | 321.4279 | 209.8199 | 211.772  | 202.0009 |
| 6053  | PARP2     | 2019.664 | -0.56822   | 0.137151 | -4.14299 | 3.43E-05 | 0.000151 | 2113.053 | 2927.011 | 2195.728 | 1669.631 | 1608.611 | 1603.947 |
| 4231  | RNP26     | 1910.587 | -0.56826   | 0.109318 | -5.19827 | 2.01E-07 | 1.26E-06 | 2162.925 | 2531.232 | 2151.897 | 1537.935 | 1535.881 | 1543.648 |
| 12848 | NT5M      | 140.3041 | -0.56909   | 0.255302 | -2.22908 | 0.025809 | 0.053404 | 202.1982 | 134.1159 | 167.6713 | 107.1421 | 109.0946 | 121.6025 |
| 4968  | STX16     | 1759.191 | -0.56918   | 0.120956 | -4.70566 | 2.53E-06 | 1.35E-05 | 1918.986 | 2364.819 | 2026.665 | 1348.205 | 1366.892 | 1529.579 |
| 11085 | LTK       | 267.5111 | -0.56935   | 0.218242 | -2.60881 | 0.009086 | 0.02179  | 375.1238 | 244.6931 | 341.6041 | 185.2665 | 218.1893 | 240.1901 |
| 24636 | LOC119624 | 2.594592 | -0.56949   | 1.839478 | -0.30959 | 0.756871 | 0.816748 | 2.710432 | 6.568942 | 0        | 0        | 4.278221 | 2.009959 |
| 7596  | CWC25     | 1187.567 | -0.56985   | 0.161553 | -3.52731 | 0.00042  | 0.001469 | 1260.893 | 1776.351 | 1223.096 | 883.9223 | 917.6785 | 1062.263 |
| 12451 | ZFP69B    | 165.8744 | -0.56987   | 0.246649 | -2.31046 | 0.020863 | 0.044545 | 214.1241 | 231.0078 | 149.5822 | 120.5349 | 143.3204 | 136.6772 |
| 6101  | WDR17     | 479.1746 | -0.57003   | 0.138312 | -4.12135 | 3.77E-05 | 0.000164 | 555.6385 | 594.4892 | 567.7168 | 388.3901 | 382.9008 | 385.9121 |
| 4457  | LOC119618 | 1511.334 | -0.57046   | 0.113251 | -5.03717 | 4.72E-07 | 2.82E-06 | 1774.791 | 1895.14  | 1756.026 | 1191.956 | 1114.477 | 1335.618 |
| 3142  | PMAIP1    | 2792.379 | -0.57074   | 0.091651 | -6.22732 | 4.74E-10 | 4.01E-09 | 3228.124 | 3425.703 | 3354.817 | 2281.234 | 2301.683 | 2162.716 |
| 9976  | KREMEN1   | 215.8865 | -0.57129   | 0.199213 | -2.86774 | 0.004134 | 0.011017 | 267.7907 | 275.3481 | 229.5914 | 194.195  | 162.5724 | 165.8216 |
| 3721  | LATS2     | 2757.484 | -0.57136   | 0.101666 | -5.61998 | 1.91E-08 | 1.36E-07 | 3341.42  | 3368.225 | 3188.537 | 2089.271 | 2128.415 | 2429.035 |
| 17450 | LOC119618 | 41.56727 | -0.57155   | 0.402978 | -1.41831 | 0.1561   | 0.237815 | 52.04029 | 47.62483 | 48.7012  | 31.24978 | 40.6431  | 29.1444  |
| 7422  | MED22     | 2822.229 | -0.57156   | 0.159152 | -3.59128 | 0.000329 | 0.001179 | 3886.759 | 2602.396 | 3640.067 | 2078.11  | 2057.824 | 2668.22  |
| 3934  | NADK2     | 1469.418 | -0.57165   | 0.105514 | -5.41775 | 6.04E-08 | 4.08E-07 | 1695.646 | 1877.623 | 1696.193 | 1176.331 | 1197.902 | 1172.811 |
| 21227 | LOC103236 | 15.70646 | -0.57179   | 0.675035 | -0.84705 | 0.396965 | 0.497164 | 20.0572  | 24.63353 | 11.1317  | 13.39276 | 14.97377 | 10.04979 |
| 20996 | LOC103246 | 18.85607 | -0.572     | 0.650668 | -0.87909 | 0.379352 | 0.480333 | 26.56223 | 10.94824 | 29.91645 | 13.39276 | 19.252   | 13.06473 |
| 16787 | LOC103246 | 59.8455  | -0.57204   | 0.374481 | -1.52755 | 0.126625 | 0.200507 | 67.7608  | 84.84883 | 59.8329  | 53.57105 | 59.8951  | 33.16432 |
| 23606 | TRNAL-AA  | 4.897366 | -0.57228   | 1.223861 | -0.46761 | 0.640067 | 0.720841 | 8.673382 | 3.831883 | 5.565851 | 0        | 4.278221 | 7.034856 |
| 4983  | RNF19A    | 2069.377 | -0.5724    | 0.121861 | -4.69712 | 2.64E-06 | 1.41E-05 | 2314.709 | 2867.89  | 2240.951 | 1624.988 | 1698.454 | 1669.271 |
| 3868  | PDCD11    | 7260.256 | -0.57265   | 0.104506 | -5.47956 | 4.26E-08 | 2.93E-07 | 8572.012 | 9203.087 | 8281.986 | 5707.549 | 5300.716 | 6496.187 |
| 22760 | LOC103246 | 7.377333 | -0.57272   | 0.95507  | -0.59966 | 0.54873  | 0.640948 | 6.505036 | 7.663765 | 11.82743 | 6.696381 | 8.556443 | 3.014938 |
| 15562 | LOC103238 | 77.70184 | -0.57273   | 0.330229 | -1.73433 | 0.08286  | 0.141551 | 104.6227 | 74.99542 | 99.48959 | 44.64254 | 79.14709 | 63.31371 |
| 11576 | LOC103246 | 474.6643 | -0.57286   | 0.229108 | -2.5004  | 0.012405 | 0.028489 | 452.6421 | 788.8204 | 458.487  | 377.2295 | 449.2132 | 321.5934 |
| 20441 | LOC119625 | 20.99201 | -0.57317   | 0.599772 | -0.95564 | 0.339253 | 0.44121  | 27.6464  | 18.06459 | 28.52499 | 24.5534  | 17.11289 | 10.04979 |
| 9227  | MRPS14    | 1266.786 | -0.57322   | 0.188031 | -3.04853 | 0.0023   | 0.006626 | 1781.296 | 1023.66  | 1741.416 | 1084.814 | 928.374  | 1041.159 |
| 6324  | LRIF1     | 979.3988 | -0.57332   | 0.142815 | -4.01442 | 5.96E-05 | 0.000251 | 1066.826 | 1389.331 | 1056.816 | 823.6549 | 767.9407 | 771.8242 |
| 5851  | LOC103246 | 1236.512 | -0.57337   | 0.135026 | -4.2464  | 2.17E-05 | 9.87E-05 | 1366.6   | 1743.507 | 1327.455 | 984.368  | 986.13   | 1011.009 |
| 12990 | LOC103225 | 117.634  | -0.57344   | 0.260008 | -2.20547 | 0.027421 | 0.05612  | 140.4004 | 146.7064 | 137.0591 | 71.42806 | 102.6773 | 107.5328 |
| 4063  | TARBP1    | 3441.359 | -0.57356   | 0.107759 | -5.32255 | 1.02E-07 | 6.70E-07 | 4399.031 | 3941.365 | 4018.544 | 2562.482 | 2652.497 | 3074.232 |
| 20473 | LOC103246 | 19.35123 | -0.57357   | 0.603284 | -0.95075 | 0.341729 | 0.443784 | 18.43094 | 31.20247 | 19.48048 | 20.08914 | 12.83466 | 14.06971 |
| 2547  | OCIAD1    | 6369.523 | -0.57358   | 0.08124  | -7.06026 | 1.66E-12 | 1.73E-11 | 7768.098 | 7641.322 | 7446.413 | 5082.553 | 5223.708 | 5055.047 |
| 8065  | NCL       | 35459.73 | -0.57387   | 0.169027 | -3.39516 | 0.000686 | 0.002261 | 35501.24 | 57890.99 | 33871.68 | 27805.61 | 27348.53 | 30340.33 |
| 4325  | WDR73     | 1355.348 | -0.57389   | 0.111773 | -5.13441 | 2.83E-07 | 1.74E-06 | 1701.067 | 1555.197 | 1614.097 | 1060.26  | 1024.634 | 1176.831 |
| 6851  | IFT81     | 869.0723 | -0.57409   | 0.151242 | -3.7958  | 0.000147 | 0.000571 | 955.6983 | 1237.698 | 925.3227 | 758.9232 | 635.3159 | 701.4757 |
| 3597  | UTRN      | 23892.7  | -0.57411   | 0.09989  | -5.74746 | 9.06E-09 | 6.70E-08 | 27282.12 | 31831.45 | 26646.51 | 18560.14 | 18702.24 | 20333.75 |
| 18424 | LOC119624 | 41.04499 | -0.57418   | 0.455228 | -1.26129 | 0.207204 | 0.298975 | 40.11439 | 64.59459 | 41.04815 | 33.4819  | 44.92132 | 22.10955 |
| 3967  | CUNH1orf4 | 3313.658 | -0.57437   | 0.106357 | -5.40034 | 6.65E-08 | 4.46E-07 | 4163.223 | 3534.638 | 4198.739 | 2524.536 | 2742.34  | 2718.469 |
| 5048  | IL15      | 935.3839 | -0.57441   | 0.123225 | -4.66148 | 3.14E-06 | 1.65E-05 | 1185.543 | 1018.733 | 1154.914 | 709.8164 | 776.4972 | 766.7993 |
| 27163 | TRNAA-AG  | 0.606598 | -0.57445   | 3.366599 | -0.17063 | 0.864512 | NA       | 0        | 0.547412 | 2.087194 | 0        | 0        | 1.004979 |
| 8809  | FNDCC5    | 250.2573 | -0.57475   | 0.181205 | -3.17182 | 0.001515 | 0.004571 | 274.8378 | 319.1411 | 304.7303 | 200.8914 | 198.9373 | 203.0059 |
| 3749  | HNRNPA0   | 4413.228 | -0.57481   | 0.102761 | -5.59365 | 2.22E-08 | 1.58E-07 | 5189.935 | 5671.186 | 4989.785 | 3383.905 | 3373.378 | 3871.181 |
| 6955  | MRPS5     | 3075.411 | -0.57482   | 0.153123 | -3.754   | 0.000174 | 0.000665 | 3159.821 | 4725.259 | 3156.533 | 2459.804 | 2372.274 | 2578.777 |
| 4296  | RAD51AP1  | 1043.293 | -0.57486   | 0.111441 | -5.15842 | 2.49E-07 | 1.54E-06 | 1243.546 | 1223.465 | 1277.363 | 888.3865 | 797.8883 | 829.1081 |
| 5601  | TESC      | 598.9694 | -0.57489   | 0.131435 | -4.37395 | 1.22E-05 | 5.79E-05 | 737.7795 | 715.4672 | 700.6015 | 466.5145 | 459.9088 | 513.5445 |
| 10586 | SYTL1     | 494.4634 | -0.57489   | 0.210908 | -2.7258  | 0.006415 | 0.016109 | 698.2072 | 408.9166 | 669.9893 | 417.4077 | 340.1186 | 432.1412 |
| 10302 | LOC119627 | 256.692  | -0.57524   | 0.206352 | -2.78765 | 0.005309 | 0.013701 | 336.6356 | 257.831  | 331.1681 | 180.8023 | 192.52   | 241.1951 |
| 16087 | LOC103246 | 58.77565 | -0.57543   | 0.349045 | -1.64858 | 0.099234 | 0.163992 | 80.22878 | 66.23683 | 63.31155 | 51.33892 | 51.33866 | 40.19918 |
| 10651 | LOC119625 | 269.0111 | -0.57544   | 0.212848 | -2.70354 | 0.00686  | 0.017124 | 328.5043 | 262.2103 | 377.0864 | 238.8736 | 173.268  | 234.1602 |
| 16869 | LOC103227 | 53.39526 | -0.57546   | 0.380681 | -1.51166 | 0.130621 | 0.205867 | 75.35001 | 56.93083 | 58.44144 | 35.71403 | 57.75599 | 36.17926 |
| 14189 | LOC119625 | 103.9146 | -0.57547   | 0.290788 | -1.97899 | 0.047817 | 0.089598 | 106.791  | 134.1159 | 130.7975 | 69.19594 | 111.2338 | 71.35354 |
| 5343  | TBPL1     | 711.0608 | -0.57554   | 0.128078 | -4.49364 | 7.00E-06 | 3.48E-05 | 876.0116 | 786.6308 | 892.6233 | 571.4245 | 549.7514 | 589.9229 |
| 19504 | SLFN5     | 27.09453 | -0.57577   | 0.523079 | -1.10073 | 0.271013 | 0.369405 | 30.89892 | 26.27577 | 38.96096 | 24.5534  | 27.80844 | 14.06971 |
| 4541  | CUL9      | 2200.726 | -0.57578   | 0.115521 | -4.98419 | 6.22E-07 | 3.64E-06 | 2725.068 | 2531.232 | 2656.302 | 1658.47  | 1619.307 | 2013.979 |
| 6886  | NCAPH2    | 2684.44  | -0.57579   | 0.152284 | -3.78101 | 0.000156 | 0.000603 | 3719.797 | 2492.366 | 3430.651 | 2249.984 | 1880.278 | 2333.562 |
| 23759 | LOC103245 | 4.321939 | -0.57642   | 1.29893  | -0.44377 | 0.65721  | 0.735382 | 10.29964 | 2.189647 | 2.782925 | 2.232127 | 6.417332 | 2.009959 |
| 4258  | SMOX      | 1362.772 | -0.57676   | 0.111252 | -5.18425 | 2.17E-07 | 1.35E-06 | 1671.794 | 1649.352 | 1580.006 | 1073.653 | 1013.938 | 1187.886 |
| 16126 | LOC103215 | 74.02462 | -0.57696   | 0.351563 | -1.64113 | 0.100771 | 0.16613  | 80.77087 | 107.2927 | 75.83472 | 84.82083 | 49.19955 | 46.22906 |
| 4806  | KIF23     | 3929.118 | -0.57724   | 0.12001  | -4.80991 | 1.51E-06 | 8.35E-06 | 4448.361 | 5485.614 | 4181.346 | 3241.048 | 2988.338 | 3230.004 |
| 4387  | ILF3      | 12372.54 | -0.5773    | 0.113458 | -5.08824 | 3.61E-07 | 2.19E-06 | 13781.46 | 17183.8  | 13485.36 | 9649.485 | 9593.911 | 10541.23 |
| 19231 | LOC103238 | 30.59994 | -0.57735   | 0.502569 | -1.14488 | 0.250639 | 0.346484 | 27.6464  | 46.53    | 34.78657 | 22.32127 | 34.22577 | 18.08963 |
| 8041  | TIMM8A    | 792.2849 | -0.57738   | 0.169745 | -3.40145 | 0.00067  | 0.002216 | 1029.422 | 732.437  | 1082.558 | 604.9064 | 714.463  | 589.9229 |
| 6527  | CWC22     | 2781.014 | -0.57752   | 0.147031 | -3.92788 | 8.57E-05 | 0.000349 | 2894.741 | 4189.343 | 2908.853 | 2158.467 | 2184.032 | 2350.647 |
| 3268  | MLLT6     | 3670.986 | -0.57757   | 0.095056 | -6.07616 | 1.23E-09 | 1.00E-08 | 4392.526 | 4409.402 | 4394.935 | 2899.533 | 2748.757 | 3180.76  |
| 5765  | ZNF273    | 1230.841 | -0.57763</ |          |          |          |          |          |          |          |          |          |          |



|       |           |           |          |          |          |          |          |          |          |          |          |          |          |
|-------|-----------|-----------|----------|----------|----------|----------|----------|----------|----------|----------|----------|----------|----------|
| 7653  | LOC119624 | 575.3545  | -0.57786 | 0.164669 | -3.5092  | 0.000449 | 0.001561 | 728.5641 | 688.0967 | 644.2472 | 450.8897 | 560.447  | 379.8822 |
| 4022  | YWHA      | 21983.24  | -0.57803 | 0.107935 | -5.35536 | 8.54E-08 | 5.64E-07 | 23223.52 | 29918.25 | 25842.25 | 17803.44 | 18193.14 | 16918.83 |
| 6998  | PRDX4     | 2290.111  | -0.57819 | 0.154819 | -3.73464 | 0.000188 | 0.000714 | 3112.66  | 2034.73  | 3080.699 | 1848.201 | 1884.556 | 1779.819 |
| 10873 | LOC119625 | 168.9833  | -0.57826 | 0.217768 | -2.65541 | 0.007921 | 0.019368 | 202.7403 | 195.426  | 210.8066 | 111.6063 | 147.5986 | 145.722  |
| 4213  | MYH14     | 946.5006  | -0.57828 | 0.111027 | -5.20844 | 1.90E-07 | 1.20E-06 | 1107.482 | 1156.681 | 1136.825 | 754.4589 | 765.8016 | 757.7545 |
| 4524  | RAB11FIP2 | 4113.78   | -0.57828 | 0.115636 | -5.00086 | 5.71E-07 | 3.35E-06 | 4606.65  | 5706.768 | 4470.77  | 3265.602 | 3212.944 | 3419.945 |
| 5286  | HECA      | 899.7157  | -0.57832 | 0.127743 | -4.52721 | 5.98E-06 | 3.01E-05 | 1148.681 | 1066.906 | 1023.421 | 660.7096 | 701.6283 | 796.9487 |
| 5370  | ZCCHC9    | 1957.753  | -0.57845 | 0.129117 | -4.48007 | 7.46E-06 | 3.69E-05 | 2144.494 | 2599.111 | 2283.39  | 1636.149 | 1732.68  | 1350.692 |
| 6247  | FNBP1     | 1417.858  | -0.5787  | 0.142782 | -4.05303 | 5.06E-05 | 0.000215 | 1509.168 | 2067.027 | 1518.086 | 1133.921 | 1159.398 | 1119.547 |
| 13577 | EFCA13    | 97.23741  | -0.57873 | 0.276508 | -2.09298 | 0.036351 | 0.071178 | 130.6428 | 106.7453 | 113.4042 | 69.19594 | 77.00798 | 86.42823 |
| 3785  | TRIM5     | 2154.321  | -0.57904 | 0.104179 | -5.55815 | 2.73E-08 | 1.92E-07 | 2481.129 | 2725.016 | 2537.332 | 1839.273 | 1591.498 | 1751.679 |
| 3448  | PTTG1     | 1855.211  | -0.57907 | 0.098108 | -5.90238 | 3.58E-09 | 2.76E-08 | 2197.076 | 2249.863 | 2220.775 | 1562.489 | 1409.674 | 1491.39  |
| 17695 | SEMA4G    | 41.18317  | -0.57915 | 0.417915 | -1.38581 | 0.165806 | 0.249107 | 45.53526 | 57.47824 | 43.83108 | 33.4819  | 40.6431  | 26.12947 |
| 22872 | LOC119626 | 7.479162  | -0.57924 | 0.993716 | -0.5829  | 0.559959 | 0.650862 | 8.673382 | 9.306001 | 8.348776 | 13.39276 | 2.139111 | 3.014938 |
| 7074  | SPSB1     | 570.8984  | -0.57924 | 0.156386 | -3.70392 | 0.000212 | 0.000798 | 643.9986 | 767.4714 | 645.6387 | 395.0865 | 455.6306 | 517.5644 |
| 17989 | FBXO2     | 44.32683  | -0.57928 | 0.430717 | -1.34493 | 0.178648 | 0.264002 | 55.8349  | 42.69812 | 60.52863 | 51.33892 | 21.39111 | 34.1693  |
| 14769 | LOC119627 | 96.51223  | -0.57942 | 0.308469 | -1.87839 | 0.060328 | 0.108596 | 132.2691 | 82.65918 | 130.7975 | 82.5887  | 83.42532 | 67.33362 |
| 4307  | TIMM22    | 1291.288  | -0.57944 | 0.112475 | -5.15168 | 2.58E-07 | 1.59E-06 | 1527.599 | 1612.675 | 1506.954 | 1026.778 | 956.1825 | 1117.537 |
| 16684 | LOC119628 | 66.95019  | -0.57946 | 0.375121 | -1.54473 | 0.122411 | 0.195051 | 100.286  | 60.76271 | 82.0963  | 42.41041 | 42.78221 | 73.3635  |
| 19071 | PPP1R1B   | 29.47138  | -0.57952 | 0.493502 | -1.1743  | 0.240273 | 0.334941 | 30.35684 | 30.10765 | 45.22254 | 20.08914 | 29.94755 | 21.10457 |
| 7322  | FDX2      | 408.1719  | -0.5797  | 0.159848 | -3.62655 | 0.000287 | 0.001043 | 545.3389 | 465.8475 | 453.6169 | 325.8905 | 350.8141 | 307.5237 |
| 6139  | PSMB3     | 4194.486  | -0.57985 | 0.141385 | -4.10124 | 4.11E-05 | 0.000178 | 5721.722 | 3886.624 | 5473.319 | 3343.726 | 3197.97  | 3543.558 |
| 7020  | CUNH12or  | 727.1725  | -0.57997 | 0.155617 | -3.72687 | 0.000194 | 0.000734 | 908.5368 | 724.2258 | 981.677  | 640.6204 | 524.0821 | 583.8931 |
| 19475 | LOC119629 | 29.02440  | -0.58002 | 0.525188 | -1.10441 | 0.269417 | 0.367739 | 28.73058 | 35.03436 | 41.74388 | 26.78552 | 10.69555 | 31.15436 |
| 5849  | HIVEP1    | 2257.748  | -0.58048 | 0.136654 | -4.2478  | 2.16E-05 | 9.81E-05 | 2354.281 | 3257.1   | 2509.503 | 1790.166 | 1704.871 | 1930.566 |
| 5569  | LOC103240 | 1067.661  | -0.58064 | 0.132383 | -4.38605 | 1.15E-05 | 5.51E-05 | 1454.418 | 1133.69  | 1251.621 | 805.7978 | 894.1483 | 866.2923 |
| 4553  | DYRK2     | 1885.141  | -0.58069 | 0.116826 | -4.97052 | 6.68E-07 | 3.90E-06 | 2228.517 | 2454.047 | 2103.196 | 1421.865 | 1428.926 | 1674.296 |
| 7400  | MIPOL1    | 449.2084  | -0.58083 | 0.161341 | -3.6     | 0.000318 | 0.001143 | 498.7195 | 623.5021 | 493.2735 | 343.7476 | 372.2053 | 363.8026 |
| 4192  | RBM18     | 1016.977  | -0.58096 | 0.111112 | -5.2286  | 1.71E-07 | 1.08E-06 | 1227.826 | 1180.22  | 1246.055 | 837.0476 | 827.8358 | 782.879  |
| 3443  | FARSB     | 2579.516  | -0.58143 | 0.098418 | -5.90775 | 3.47E-09 | 2.68E-08 | 3021.047 | 3217.139 | 3044.52  | 2080.342 | 1925.2   | 2188.845 |
| 3930  | VRK1      | 2001.593  | -0.58144 | 0.107303 | -5.41867 | 6.00E-08 | 4.06E-07 | 2311.456 | 2629.219 | 2256.953 | 1665.167 | 1550.855 | 1595.907 |
| 18182 | LOC119630 | 37.98004  | -0.58146 | 0.445514 | -1.30513 | 0.191848 | 0.280512 | 32.52518 | 56.38342 | 47.30973 | 35.71403 | 27.80844 | 28.13943 |
| 3255  | DCA2SE2   | 5040.322  | -0.58156 | 0.095484 | -6.09066 | 1.12E-09 | 9.18E-09 | 6292.539 | 5749.466 | 6094.607 | 3843.723 | 3906.016 | 4355.581 |
| 6926  | PQR5      | 631.6618  | -0.5818  | 0.154536 | -3.76482 | 0.000167 | 0.00064  | 801.0893 | 801.9583 | 713.1247 | 404.015  | 554.0297 | 555.7536 |
| 4099  | CCNA2     | 5022.043  | -0.58185 | 0.109849 | -5.29679 | 1.18E-07 | 7.64E-07 | 5526.028 | 6901.221 | 5635.424 | 4013.364 | 4066.449 | 3989.768 |
| 16873 | LOC119631 | 47.47676  | -0.58191 | 0.385201 | -1.51066 | 0.130874 | 0.206205 | 58.00324 | 64.04718 | 48.00546 | 35.71403 | 44.92132 | 34.1693  |
| 3684  | SEPTIN8   | 10113.87  | -0.58205 | 0.102793 | -5.66232 | 1.49E-08 | 1.08E-07 | 11641.85 | 13400.64 | 11344.6  | 7919.587 | 7647.321 | 8729.252 |
| 7044  | NUP37     | 1257.082  | -0.58219 | 0.156722 | -3.71478 | 0.000203 | 0.000768 | 1731.424 | 1153.397 | 1637.056 | 970.9752 | 1056.721 | 992.9197 |
| 2858  | GPX8      | 3690.351  | -0.58241 | 0.088214 | -6.60223 | 4.05E-11 | 3.77E-10 | 4534.552 | 4284.592 | 4458.942 | 2843.73  | 3020.424 | 2999.864 |
| 3588  | DDX47     | 1920.837  | -0.5827  | 0.101211 | -5.75725 | 8.55E-09 | 6.33E-08 | 2406.321 | 2335.806 | 2172.073 | 1495.525 | 1512.351 | 1602.942 |
| 23436 | FRMPD1    | 7.580245  | -0.58315 | 1.180427 | -0.49401 | 0.621296 | 0.704777 | 9.215468 | 7.663765 | 9.740239 | 17.85702 | 0        | 1.004979 |
| 4864  | DCAF1     | 5316.954  | -0.58333 | 0.122438 | -4.76429 | 1.90E-06 | 1.04E-05 | 5929.341 | 7522.533 | 5684.125 | 4069.167 | 4169.127 | 4527.433 |
| 7485  | PRIMPOL   | 475.7562  | -0.5835  | 0.163565 | -3.5674  | 0.000361 | 0.001281 | 613.6418 | 483.3646 | 618.5052 | 354.9082 | 370.0661 | 414.0515 |
| 8480  | SLC19A1   | 7462.3539 | -0.58364 | 0.179044 | -3.25979 | 0.001115 | 0.003495 | 608.763  | 447.7829 | 611.5479 | 339.2833 | 348.675  | 418.0715 |
| 7066  | ARL16     | 747.0709  | -0.58367 | 0.157497 | -3.7059  | 0.000211 | 0.000793 | 981.7184 | 713.825  | 993.5044 | 613.8349 | 577.5599 | 601.9827 |
| 12865 | MSLN      | 149.5844  | -0.58369 | 0.26227  | -2.22554 | 0.026045 | 0.053821 | 187.0198 | 139.0426 | 212.1981 | 98.21359 | 145.4595 | 115.5726 |
| 8772  | CCDC18    | 878.436   | -0.58403 | 0.183588 | -3.18121 | 0.001467 | 0.004445 | 915.0418 | 1393.163 | 852.2709 | 669.6381 | 755.1061 | 685.396  |
| 4115  | ATXN2L    | 4256.222  | -0.58423 | 0.110573 | -5.28369 | 1.27E-07 | 8.18E-07 | 4659.232 | 5763.699 | 4900.732 | 3366.047 | 3240.753 | 3606.871 |
| 3891  | DENR      | 4749.53   | -0.58471 | 0.107257 | -5.45155 | 4.99E-08 | 3.41E-07 | 5405.685 | 6432.089 | 5261.121 | 3850.419 | 3636.488 | 3911.38  |
| 23003 | LOC103241 | 8.88605   | -0.58476 | 1.039622 | -0.56248 | 0.573791 | 0.663142 | 1.084173 | 13.6853  | 17.39328 | 6.696381 | 6.417332 | 8.039836 |
| 12229 | LOC103227 | 121.2637  | -0.58495 | 0.247794 | -2.36065 | 0.018243 | 0.039659 | 131.1849 | 153.2753 | 151.6694 | 107.1421 | 89.84265 | 94.46807 |
| 4875  | SVEP1     | 795.2014  | -0.58495 | 0.122968 | -4.75697 | 1.97E-06 | 1.07E-05 | 918.2943 | 1012.164 | 935.063  | 636.1562 | 603.2292 | 666.3014 |
| 7801  | RPF2      | 1287.078  | -0.585   | 0.168841 | -3.4648  | 0.000531 | 0.001808 | 1325.943 | 2015.023 | 1291.973 | 1004.457 | 1060.999 | 1024.074 |
| 3909  | SEN2      | 2574.811  | -0.58506 | 0.107588 | -5.43796 | 5.39E-08 | 3.67E-07 | 2924.014 | 3431.177 | 2915.81  | 2100.431 | 1967.982 | 2109.452 |
| 21854 | LOC119632 | 11.5365   | -0.58516 | 0.778283 | -0.75187 | 0.452132 | 0.54999  | 18.97302 | 12.59047 | 10.43597 | 4.464254 | 10.69555 | 12.05975 |
| 3796  | TCEA1     | 7433.661  | -0.58532 | 0.105468 | -5.54973 | 2.86E-08 | 2.00E-07 | 8257.602 | 10107.96 | 8395.39  | 5919.601 | 6147.804 | 5773.607 |
| 6742  | RAD50     | 5506.51   | -0.58545 | 0.152426 | -3.8409  | 0.000123 | 0.000483 | 5694.075 | 8563.71  | 5569.33  | 4337.023 | 4310.308 | 4564.617 |
| 8724  | LOC119633 | 556.447   | -0.58545 | 0.18322  | -3.19536 | 0.001397 | 0.004256 | 684.113  | 581.8988 | 741.6496 | 491.0679 | 329.423  | 510.5296 |
| 10712 | LOC103242 | 227.1772  | -0.58561 | 0.217763 | -2.6892  | 0.007162 | 0.017775 | 234.7234 | 338.8479 | 244.2017 | 171.8738 | 192.52   | 180.8963 |
| 3506  | RCHY1     | 1870.001  | -0.58575 | 0.100124 | -5.85025 | 4.91E-09 | 3.72E-08 | 2336.392 | 2133.811 | 2264.606 | 1533.471 | 1433.204 | 1518.524 |
| 10577 | LOC103243 | 300.5498  | -0.58589 | 0.214795 | -2.7277  | 0.006378 | 0.016031 | 396.2651 | 268.7792 | 418.1346 | 263.391  | 207.4937 | 249.2349 |
| 4521  | UTP11     | 1654.54   | -0.58594 | 0.117164 | -5.00103 | 5.70E-07 | 3.35E-06 | 1853.393 | 2242.199 | 1861.081 | 1359.365 | 1302.718 | 1308.483 |
| 3516  | GOSR2     | 3390.595  | -0.58597 | 0.100253 | -5.8449  | 5.07E-09 | 3.83E-08 | 3939.884 | 4309.226 | 3968.452 | 2569.178 | 2618.271 | 2938.56  |
| 6991  | STOX2     | 620.6869  | -0.58634 | 0.156878 | -3.73756 | 0.000186 | 0.000707 | 668.3925 | 888.4494 | 679.7295 | 482.1394 | 489.8563 | 515.5545 |
| 21452 | TRNAT-UG  | 16.89088  | -0.58649 | 0.723222 | -0.81095 | 0.417397 | 0.517288 | 18.43094 | 8.211177 | 34.09084 | 17.85702 | 10.69555 | 12.05975 |
| 12836 | LOC103244 | 122.5261  | -0.5865  | 0.262829 | -2.23149 | 0.025648 | 0.053121 | 150.1579 | 122.6202 | 169.0627 | 82.5887  | 111.2338 | 99.49297 |
| 23953 | LOC119634 | 3.552588  | -0.58651 | 1.416009 | -0.4142  | 0.678726 | 0.753305 | 6.505036 | 1.642235 | 4.87012  | 0        | 4.278221 | 4.019918 |
| 4032  | ALG9      | 1539.645  | -0.58655 | 0.109652 | -5.34921 | 8.83E-08 | 5.82E-07 | 1813.821 | 1986.01  | 1747.677 | 1258.92  | 1155.12  | 1276.324 |
| 16410 | LOC119635 | 54.15077  | -0.58664 | 0.369693 | -1.58683 | 0.112551 | 0.182338 | 66.67662 | 69.5213  | 57.04997 | 53.57105 | 44.92132 | 33.16432 |
| 3595  | LOC103228 | 4668.821  | -0.58691 | 0.102051 | -5.75116 | 8.86E-09 | 6.55E-08 | 5893.563 | 4990.754 | 5930.414 | 3772.295 | 3796.921 | 3628.981 |
| 5540  | BAZ1B     | 15453.16  | -0.58727 | 0.133586 | -4.39622 | 1.10E-05 | 5.29E-05 |          |          |          |          |          |          |



|       |           |          |          |          |          |          |          |          |          |          |          |          |          |
|-------|-----------|----------|----------|----------|----------|----------|----------|----------|----------|----------|----------|----------|----------|
| 2686  | RABGGTB   | 3849.506 | -0.58749 | 0.085743 | -6.85173 | 7.30E-12 | 7.22E-11 | 4583.34  | 4725.259 | 4557.736 | 3026.764 | 3165.884 | 3038.053 |
| 11776 | LOC119618 | 178.5055 | -0.58754 | 0.23947  | -2.45348 | 0.014148 | 0.03194  | 182.141  | 248.525  | 212.8938 | 169.6417 | 109.0946 | 148.737  |
| 4625  | CPSF6     | 6648.565 | -0.58759 | 0.119137 | -4.93204 | 8.14E-07 | 4.68E-06 | 7416.826 | 9426.979 | 7109.679 | 5180.767 | 5307.134 | 5450.004 |
| 11928 | LOC119618 | 122.8978 | -0.58805 | 0.243078 | -2.41919 | 0.015555 | 0.034669 | 145.8212 | 151.0857 | 147.4951 | 87.05295 | 98.39909 | 107.5328 |
| 2723  | GRSF1     | 4081.644 | -0.58817 | 0.086335 | -6.81262 | 9.58E-12 | 9.36E-11 | 4999.12  | 4925.612 | 4777.587 | 3352.655 | 3279.257 | 3155.636 |
| 5857  | LIPE      | 1302.825 | -0.58855 | 0.13886  | -4.2384  | 2.25E-05 | 0.000102 | 1600.781 | 1460.495 | 1639.839 | 1098.206 | 842.8096 | 1174.821 |
| 20030 | EFCAB3    | 21.93453 | -0.58894 | 0.575785 | -1.02284 | 0.306382 | 0.406663 | 24.93597 | 28.46541 | 24.3506  | 24.5534  | 19.252   | 10.04979 |
| 22068 | TRNAE-UU  | 13.37953 | -0.5891  | 0.825349 | -0.71376 | 0.475379 | 0.572661 | 23.8518  | 4.379295 | 20.17621 | 13.39276 | 6.417332 | 12.05975 |
| 17345 | LOC119624 | 60.69761 | -0.58922 | 0.409263 | -1.4397  | 0.149951 | 0.229819 | 98.11763 | 41.05589 | 80.00911 | 42.41041 | 51.33866 | 51.25395 |
| 8709  | HOXC6     | 574.8928 | -0.58939 | 0.184199 | -3.19977 | 0.001375 | 0.004199 | 574.6116 | 868.1951 | 628.2454 | 415.1756 | 521.943  | 441.186  |
| 11693 | LOC103232 | 220.9922 | -0.58958 | 0.238431 | -2.47275 | 0.013408 | 0.030483 | 237.4338 | 349.2487 | 208.7194 | 183.0344 | 179.6853 | 167.8316 |
| 3777  | SLC11A2   | 3796.037 | -0.58963 | 0.105914 | -5.56712 | 2.59E-08 | 1.82E-07 | 4873.356 | 4293.898 | 4525.037 | 2901.765 | 2838.6   | 3343.567 |
| 13523 | DLX6      | 113.8341 | -0.58966 | 0.280397 | -2.10297 | 0.035469 | 0.069728 | 122.5115 | 164.771  | 121.0573 | 87.05295 | 111.2338 | 76.37844 |
| 7666  | HIPK2     | 3521.941 | -0.58969 | 0.168291 | -3.50401 | 0.000458 | 0.001589 | 3321.905 | 5655.859 | 3718.684 | 2810.248 | 2714.531 | 2910.421 |
| 4774  | MRPL11    | 3046.422 | -0.58993 | 0.122197 | -4.82773 | 1.38E-06 | 7.69E-06 | 4002.766 | 3055.105 | 3923.229 | 2511.143 | 2406.5   | 2379.791 |
| 6646  | TOMM34    | 861.226  | -0.58994 | 0.152046 | -3.87999 | 0.000104 | 0.000418 | 993.6443 | 1120.552 | 995.5916 | 734.3698 | 543.3341 | 779.8641 |
| 5284  | SMARCE1   | 7248.518 | -0.59003 | 0.130325 | -4.52733 | 5.97E-06 | 3.01E-05 | 7720.936 | 10664.68 | 7744.882 | 5732.102 | 5873.998 | 5754.512 |
| 4116  | CAV1      | 8137.565 | -0.59019 | 0.111722 | -5.28268 | 1.27E-07 | 8.22E-07 | 9110.846 | 11162.27 | 9070.25  | 6171.831 | 6312.516 | 6997.672 |
| 4082  | AARS1     | 14737.25 | -0.59041 | 0.111187 | -5.31003 | 1.10E-07 | 7.14E-07 | 16653.98 | 19906.08 | 16582.06 | 11348.13 | 10913.74 | 13019.51 |
| 4239  | SREK1P1   | 2233.517 | -0.59045 | 0.113677 | -5.19411 | 2.06E-07 | 1.29E-06 | 2532.628 | 3042.515 | 2478.195 | 1783.469 | 1758.349 | 1805.948 |
| 6544  | EIF6      | 4414.867 | -0.59064 | 0.150603 | -3.92181 | 8.79E-05 | 0.000357 | 6153.222 | 4058.511 | 5711.955 | 3430.779 | 3202.249 | 3932.485 |
| 3829  | CDCA8     | 1195.06  | -0.59072 | 0.107106 | -5.51527 | 3.48E-08 | 2.42E-07 | 1424.061 | 1458.852 | 1426.945 | 901.7793 | 998.9647 | 959.7554 |
| 7822  | LOC103228 | 341.8851 | -0.59092 | 0.170795 | -3.45982 | 0.000541 | 0.001837 | 422.8274 | 424.7916 | 381.9565 | 258.9267 | 316.5884 | 246.22   |
| 5492  | HNRNPDL   | 16320.05 | -0.59093 | 0.133911 | -4.41284 | 1.02E-05 | 4.94E-05 | 17039.94 | 24387.74 | 17421.81 | 12738.75 | 13159.81 | 13172.27 |
| 17276 | LOC119622 | 64.81377 | -0.59093 | 0.406456 | -1.45385 | 0.145987 | 0.224651 | 68.84497 | 77.73248 | 84.1835  | 60.26743 | 72.72976 | 25.12449 |
| 13634 | LOC119622 | 112.7465 | -0.59138 | 0.284058 | -2.08189 | 0.037353 | 0.07284  | 110.5856 | 163.6761 | 130.1018 | 98.21359 | 100.5382 | 73.3635  |
| 16624 | TEX14     | 51.5504  | -0.59144 | 0.380665 | -1.55369 | 0.120258 | 0.192315 | 53.12446 | 68.97389 | 62.61582 | 37.94616 | 53.47777 | 33.16432 |
| 2871  | RPE       | 4481.207 | -0.59165 | 0.089827 | -6.58656 | 4.50E-11 | 4.17E-10 | 5474.53  | 5062.464 | 5627.771 | 3528.993 | 3559.48  | 3634.006 |
| 25159 | LOC119622 | 0.83564  | -0.59185 | 2.684156 | -0.2205  | 0.825484 | 0.872272 | 1.084173 | 1.094824 | 0.695731 | 0        | 2.139111 | 0        |
| 5184  | MMD       | 754.0225 | -0.59196 | 0.129029 | -4.58777 | 4.48E-06 | 2.30E-05 | 902.0317 | 973.8456 | 847.4008 | 571.4245 | 588.2554 | 641.1769 |
| 4132  | DNMT1     | 7022.368 | -0.5923  | 0.112394 | -5.26989 | 1.37E-07 | 8.78E-07 | 7843.99  | 9636.09  | 7856.199 | 5638.353 | 5198.039 | 5961.538 |
| 25149 | LOC119620 | 0.851142 | -0.59234 | 2.67113  | -0.22175 | 0.824505 | 0.871584 | 1.084173 | 1.094824 | 0.695731 | 2.232127 | 0        | 0        |
| 7353  | DNAJC2    | 1973.656 | -0.59268 | 0.163919 | -3.6157  | 0.0003   | 0.001083 | 2032.824 | 3104.92  | 1981.443 | 1633.917 | 1540.16  | 1548.673 |
| 7665  | ATF5      | 490.5107 | -0.59271 | 0.169148 | -3.50407 | 0.000458 | 0.001589 | 533.9551 | 674.4114 | 555.8894 | 439.729  | 406.431  | 332.6482 |
| 21723 | TRNAT-CG  | 12.2931  | -0.59272 | 0.765135 | -0.77466 | 0.438541 | 0.536694 | 18.97302 | 8.758589 | 16.00182 | 11.16063 | 12.83466 | 6.029877 |
| 4571  | POLR3G    | 2547.806 | -0.59283 | 0.119537 | -4.95937 | 7.07E-07 | 4.11E-06 | 2834.57  | 3465.664 | 2885.894 | 2044.628 | 2196.867 | 1859.212 |
| 15972 | TRNAY-GU  | 70.79804 | -0.59297 | 0.354921 | -1.67071 | 0.094779 | 0.157757 | 86.19173 | 60.76271 | 109.9256 | 49.10679 | 53.47777 | 65.32367 |
| 19192 | LOC119620 | 30.61252 | -0.593   | 0.513388 | -1.15507 | 0.24806  | 0.343616 | 49.32986 | 28.46541 | 33.39511 | 13.39276 | 29.94755 | 29.1444  |
| 12744 | TLCD2     | 101.6357 | -0.59321 | 0.263637 | -2.2501  | 0.024443 | 0.050986 | 130.6428 | 116.0513 | 119.6658 | 87.05295 | 77.00798 | 79.39338 |
| 25169 | TRNAG-CC  | 0.836527 | -0.59323 | 2.710465 | -0.21887 | 0.826754 | 0.873267 | 0.542086 | 1.642235 | 0.695731 | 0        | 2.139111 | 0        |
| 3539  | FAM104A   | 2013.723 | -0.59367 | 0.102064 | -5.81662 | 6.00E-09 | 4.51E-08 | 2330.971 | 2607.322 | 2328.613 | 1562.489 | 1644.976 | 1607.967 |
| 25163 | NPYSR     | 0.85203  | -0.5937  | 2.697464 | -0.2201  | 0.825796 | 0.872456 | 0.542086 | 1.642235 | 0.695731 | 2.232127 | 0        | 0        |
| 3486  | PCNX4     | 1622.638 | -0.59392 | 0.101177 | -5.87009 | 4.36E-09 | 3.32E-08 | 1956.39  | 2005.169 | 1897.955 | 1227.67  | 1306.997 | 1341.648 |
| 3947  | SCRN1     | 3984.546 | -0.59405 | 0.109802 | -5.41016 | 6.30E-08 | 4.24E-07 | 4618.034 | 5292.925 | 4476.336 | 3107.121 | 2947.694 | 3465.169 |
| 3194  | AGL       | 2850.901 | -0.59415 | 0.096346 | -6.16681 | 6.97E-10 | 5.80E-09 | 3356.599 | 3634.814 | 3301.941 | 2267.841 | 2175.476 | 2368.737 |
| 3174  | DCP1A     | 2922.161 | -0.59419 | 0.095955 | -6.19241 | 5.92E-10 | 4.96E-09 | 3451.464 | 3766.741 | 3329.075 | 2330.341 | 2301.683 | 2353.662 |
| 5767  | CAPS2     | 1127.135 | -0.59432 | 0.138508 | -4.29087 | 1.78E-05 | 8.20E-05 | 1337.869 | 1500.456 | 1225.183 | 841.5119 | 1041.747 | 816.0433 |
| 16014 | LOC103222 | 71.49053 | -0.59437 | 0.35753  | -1.66242 | 0.096428 | 0.16008  | 88.90216 | 95.24966 | 70.9646  | 69.19594 | 68.45154 | 36.17926 |
| 11260 | VWA3B     | 141.2496 | -0.59438 | 0.231464 | -2.56793 | 0.010231 | 0.024155 | 189.1881 | 161.4865 | 159.3225 | 113.8385 | 109.0946 | 114.5677 |
| 3341  | SUPV3L1   | 3419.405 | -0.59451 | 0.099041 | -6.0026  | 1.94E-09 | 1.55E-08 | 4173.523 | 4219.998 | 3957.32  | 2638.374 | 2560.515 | 2966.699 |
| 20628 | LOC103215 | 18.15841 | -0.59454 | 0.638091 | -0.93175 | 0.351467 | 0.452964 | 29.27266 | 17.51718 | 18.08902 | 22.32127 | 10.69555 | 11.05477 |
| 5265  | GTF2F2    | 574.9182 | -0.59455 | 0.130844 | -4.54398 | 5.52E-06 | 2.79E-05 | 698.2072 | 715.4672 | 660.9448 | 457.586  | 462.0479 | 455.2557 |
| 17215 | LOC119622 | 44.54519 | -0.59472 | 0.405844 | -1.46539 | 0.142814 | 0.220546 | 67.21871 | 44.88777 | 49.39693 | 33.4819  | 32.08666 | 40.19918 |
| 6800  | CISD3     | 1362.091 | -0.59493 | 0.155834 | -3.81771 | 0.000135 | 0.000527 | 1779.127 | 1254.12  | 1884.041 | 1142.849 | 1031.051 | 1081.358 |
| 3275  | MCM3      | 6011.068 | -0.59494 | 0.098082 | -6.06568 | 1.31E-09 | 1.07E-08 | 7295.94  | 7401.555 | 7011.581 | 4707.556 | 4393.733 | 5256.043 |
| 13166 | LOC103232 | 250.4863 | -0.59514 | 0.273314 | -2.1775  | 0.029443 | 0.059452 | 217.9187 | 448.3303 | 237.2444 | 203.1236 | 205.3546 | 190.9461 |
| 2594  | METAP1    | 3776.014 | -0.59519 | 0.085165 | -6.98865 | 2.78E-12 | 2.84E-11 | 4505.822 | 4653     | 4474.944 | 2966.497 | 3009.729 | 3046.093 |
| 3569  | RNASEH1   | 1716.8   | -0.59532 | 0.102946 | -5.78279 | 7.35E-09 | 5.47E-08 | 2021.982 | 2139.833 | 2040.58  | 1388.383 | 1274.91  | 1435.111 |
| 19040 | LOC119618 | 28.65957 | -0.59553 | 0.505424 | -1.17828 | 0.238686 | 0.33327  | 37.40396 | 27.918   | 36.87376 | 29.01765 | 25.66933 | 15.07469 |
| 7707  | RPA3      | 1910.398 | -0.5957  | 0.170639 | -3.49101 | 0.000481 | 0.00166  | 2501.187 | 1622.529 | 2773.881 | 1566.953 | 1514.49  | 1483.35  |
| 17915 | LOC119628 | 38.48015 | -0.59574 | 0.438581 | -1.35834 | 0.174355 | 0.258734 | 39.03022 | 58.57306 | 40.35242 | 35.71403 | 32.08666 | 25.12449 |
| 20973 | LOC103244 | 17.30448 | -0.59588 | 0.675138 | -0.8826  | 0.377453 | 0.478453 | 26.02015 | 14.78012 | 20.87194 | 24.5534  | 8.556443 | 9.044815 |
| 3092  | WDR12     | 2200.965 | -0.59612 | 0.094805 | -6.28783 | 3.22E-10 | 2.77E-09 | 2657.307 | 2746.365 | 2546.377 | 1736.595 | 1726.262 | 1792.883 |
| 4662  | ATAD3A    | 1799.822 | -0.59619 | 0.121365 | -4.91233 | 9.00E-07 | 5.13E-06 | 2291.941 | 1935.648 | 2275.042 | 1520.078 | 1272.771 | 1503.449 |
| 2663  | EEF1A1    | 439710.6 | -0.59624 | 0.086688 | -6.87802 | 6.07E-12 | 6.06E-11 | 559454.8 | 485779.3 | 542669.1 | 350843.5 | 350735   | 348782.1 |
| 20715 | LOC103218 | 15.02945 | -0.59625 | 0.650327 | -0.91684 | 0.359224 | 0.461018 | 17.34676 | 19.15941 | 17.39328 | 13.39276 | 12.83466 | 10.04979 |
| 22003 | LOC103242 | 10.92728 | -0.59631 | 0.82055  | -0.72672 | 0.467398 | 0.564731 | 18.43094 | 9.306001 | 11.1317  | 6.696381 | 14.97377 | 5.024897 |
| 24785 | CYTL1     | 1.326282 | -0.59655 | 2.101872 | -0.28382 | 0.776549 | 0.832962 | 1.084173 | 1.642235 | 2.087194 | 0        | 2.139111 | 1.004979 |
| 5074  | COQ2      | 882.9404 | -0.59674 | 0.128439 | -4.64611 | 3.38E-06 | 1.77E-05 | 1005.028 | 1187.884 | 994.2001 | 703.12   | 723.0194 | 684.391  |
| 3470  | LOC103222 | 7820.08  | -0.59679 | 0.101354 | -5.88818 | 3.90E-09 | 2.99E-08 | 9241.488 | 10174.2  | 8837.18  | 5930.761 | 5938.171 | 6798.686 |
| 6367  | LOC103232 | 452.948  | -0.59702 | 0.149392 | -3.9963  |          |          |          |          |          |          |          |          |



|       |           |          |          |          |          |          |          |          |          |          |          |          |          |
|-------|-----------|----------|----------|----------|----------|----------|----------|----------|----------|----------|----------|----------|----------|
| 18127 | PDE8B     | 37.83869 | -0.59739 | 0.453823 | -1.31635 | 0.188057 | 0.275804 | 43.909   | 47.07742 | 43.83108 | 33.4819  | 40.6431  | 18.08963 |
| 3578  | RPL39     | 8479.706 | -0.59739 | 0.103432 | -5.77573 | 7.66E-09 | 5.69E-08 | 10164.12 | 9245.238 | 11217.28 | 6944.147 | 7016.283 | 6291.171 |
| 4791  | RNF19B    | 940.5723 | -0.59748 | 0.123982 | -4.81906 | 1.44E-06 | 8.00E-06 | 1140.008 | 1161.06  | 1103.43  | 725.4413 | 682.3763 | 831.118  |
| 4612  | NABP2     | 946.0695 | -0.59756 | 0.12101  | -4.93809 | 7.89E-07 | 4.55E-06 | 1141.634 | 1191.168 | 1082.558 | 823.6549 | 703.7674 | 733.635  |
| 3132  | NBEAL1    | 4638.003 | -0.59773 | 0.095771 | -6.24123 | 4.34E-10 | 3.69E-09 | 5577.527 | 6021.53  | 5157.457 | 3613.814 | 3724.192 | 3733.499 |
| 2745  | KCMF1     | 2853.321 | -0.59774 | 0.088182 | -6.77848 | 1.21E-11 | 1.18E-10 | 3504.046 | 3401.617 | 3400.735 | 2310.251 | 2263.179 | 2240.099 |
| 5136  | MYH10     | 10085.52 | -0.59785 | 0.129733 | -4.60827 | 4.06E-06 | 2.10E-05 | 10531.11 | 14684.87 | 11225.63 | 7734.32  | 7694.381 | 8642.823 |
| 4257  | ASNSD1    | 2852.486 | -0.59787 | 0.11531  | -5.18489 | 2.16E-07 | 1.35E-06 | 3139.222 | 3887.719 | 3273.416 | 2348.198 | 2350.883 | 2115.482 |
| 6299  | ZNF621    | 611.1018 | -0.59805 | 0.148539 | -4.02623 | 5.67E-05 | 0.000239 | 717.7224 | 841.9194 | 647.7259 | 502.2286 | 470.6043 | 486.4101 |
| 15991 | LOC119627 | 78.8039  | -0.59805 | 0.358626 | -1.66762 | 0.09539  | 0.158586 | 118.1748 | 57.47824 | 109.2298 | 64.73168 | 59.8951  | 63.31371 |
| 5247  | PEX10     | 1537.274 | -0.59817 | 0.131325 | -4.55489 | 5.24E-06 | 2.66E-05 | 1911.939 | 1757.739 | 1895.172 | 1093.742 | 1120.894 | 1444.155 |
| 22728 | LOC119618 | 6.749959 | -0.59825 | 0.990243 | -0.60414 | 0.545751 | 0.638366 | 9.757555 | 9.306001 | 5.565851 | 6.696381 | 2.139111 | 7.034856 |
| 3833  | CEP57     | 3511.337 | -0.59835 | 0.108565 | -5.5114  | 3.56E-08 | 2.47E-07 | 3995.177 | 4747.155 | 3940.622 | 2877.212 | 2855.713 | 2652.141 |
| 3151  | ATG4C     | 2721.684 | -0.59835 | 0.096217 | -6.21878 | 5.01E-10 | 4.23E-09 | 3163.616 | 3412.018 | 3260.197 | 2035.7   | 2271.736 | 2186.835 |
| 21731 | LOC119627 | 11.10904 | -0.59866 | 0.774779 | -0.77268 | 0.43971  | 0.537927 | 12.46799 | 18.612   | 9.044508 | 8.928508 | 8.556443 | 9.044815 |
| 21492 | LOC119618 | 12.97451 | -0.5987  | 0.743985 | -0.80471 | 0.420984 | 0.520746 | 11.38381 | 24.08612 | 11.82743 | 8.928508 | 8.556443 | 13.06473 |
| 3047  | SPTLC1    | 6623.612 | -0.59876 | 0.09439  | -6.34352 | 2.25E-10 | 1.96E-09 | 7687.327 | 8719.175 | 7531.292 | 5174.07  | 5262.212 | 5367.595 |
| 19318 | LOC103227 | 26.10195 | -0.59877 | 0.528751 | -1.13242 | 0.257457 | 0.354432 | 34.15144 | 29.01283 | 32.69937 | 15.62489 | 14.97377 | 30.14938 |
| 14305 | LOC103237 | 94.35671 | -0.59881 | 0.305446 | -1.96043 | 0.049946 | 0.092822 | 89.98634 | 133.0211 | 116.1871 | 73.66019 | 91.98176 | 61.30375 |
| 3319  | FKBP3     | 2126.278 | -0.59881 | 0.099383 | -6.02531 | 1.69E-09 | 1.35E-08 | 2491.971 | 2717.9   | 2471.238 | 1761.148 | 1664.228 | 1651.181 |
| 19480 | LOC103237 | 22.9399  | -0.59905 | 0.542659 | -1.10392 | 0.269628 | 0.367971 | 24.39389 | 30.65506 | 27.13352 | 17.85702 | 23.53022 | 14.06971 |
| 4270  | SRRD      | 869.941  | -0.5992  | 0.115745 | -5.17685 | 2.26E-07 | 1.40E-06 | 1022.375 | 1058.694 | 1063.773 | 658.4775 | 720.8803 | 695.4458 |
| 5180  | PRPF3     | 2811.446 | -0.5992  | 0.130565 | -4.5893  | 4.45E-06 | 2.28E-05 | 3065.498 | 4080.955 | 3013.908 | 2227.663 | 2254.623 | 2226.03  |
| 14836 | LOC119627 | 82.10356 | -0.59923 | 0.321327 | -1.86488 | 0.062199 | 0.111461 | 78.06044 | 124.2625 | 93.228   | 69.19594 | 70.59065 | 57.28383 |
| 20679 | LOC103237 | 17.25999 | -0.59931 | 0.647995 | -0.92487 | 0.355034 | 0.456442 | 12.46799 | 25.18094 | 24.3506  | 13.39276 | 17.11289 | 11.05477 |
| 14168 | LOC103247 | 96.91112 | -0.5995  | 0.302475 | -1.98199 | 0.047481 | 0.089068 | 134.4374 | 92.5126  | 123.8402 | 91.51721 | 57.75599 | 81.40334 |
| 4000  | SLC3A2    | 9058.829 | -0.59952 | 0.111548 | -5.37457 | 7.68E-08 | 5.10E-07 | 11885.79 | 9614.194 | 11249.98 | 7200.842 | 6588.461 | 7813.715 |
| 3091  | GPBP1L1   | 4646.946 | -0.59998 | 0.095409 | -6.28854 | 3.20E-10 | 2.76E-09 | 5360.692 | 6024.814 | 5417.66  | 3678.545 | 3533.811 | 3866.156 |
| 7655  | LOC103227 | 313.341  | -0.60002 | 0.171022 | -3.50844 | 0.000451 | 0.001565 | 346.3932 | 419.3174 | 366.6504 | 254.4625 | 245.9977 | 247.2249 |
| 15482 | LOC119627 | 66.30129 | -0.60002 | 0.343272 | -1.74796 | 0.080472 | 0.138182 | 76.97626 | 71.71095 | 93.228   | 44.64254 | 44.92132 | 66.32864 |
| 16435 | LOC119627 | 70.51781 | -0.60006 | 0.37903  | -1.58316 | 0.113385 | 0.183402 | 73.72375 | 118.241  | 63.31155 | 37.94616 | 70.59065 | 59.29379 |
| 3364  | GOSR1     | 3617.329 | -0.60024 | 0.100454 | -5.97529 | 2.30E-09 | 1.82E-08 | 4305.25  | 4663.401 | 4115.251 | 2814.712 | 2723.088 | 3082.272 |
| 4637  | PAK1      | 1222.618 | -0.60081 | 0.12199  | -4.92505 | 8.43E-07 | 4.84E-06 | 1353.048 | 1654.826 | 1413.03  | 946.4218 | 992.5473 | 975.8351 |
| 2733  | TBL1XR1   | 11016.27 | -0.60101 | 0.088354 | -6.8023  | 1.03E-11 | 1.00E-10 | 1234.5   | 14038.92 | 12565.6  | 8354.851 | 8838.805 | 9064.915 |
| 16812 | LOC119627 | 49.92919 | -0.60111 | 0.394583 | -1.52341 | 0.127656 | 0.201863 | 59.08741 | 63.49977 | 57.04997 | 29.01765 | 57.75599 | 33.16432 |
| 6726  | PEAK1     | 1126.739 | -0.60114 | 0.156286 | -3.84644 | 0.00012  | 0.000474 | 1214.273 | 1626.908 | 1237.706 | 915.1721 | 759.3843 | 1006.989 |
| 15331 | LOC103247 | 63.60756 | -0.60126 | 0.339086 | -1.77317 | 0.0762   | 0.132127 | 72.63957 | 84.84883 | 73.05179 | 37.94616 | 59.8951  | 53.26391 |
| 6489  | MAGOHB    | 518.0508 | -0.60128 | 0.152427 | -3.94474 | 7.99E-06 | 0.000327 | 665.14   | 544.1273 | 664.4235 | 383.9258 | 440.6568 | 410.0316 |
| 4975  | ZNF169    | 675.7211 | -0.60163 | 0.127978 | -4.70105 | 2.59E-06 | 1.38E-05 | 854.8702 | 757.0705 | 832.0947 | 535.7105 | 536.9168 | 537.664  |
| 6531  | KIAA1614  | 430.0257 | -0.60179 | 0.153255 | -3.92669 | 8.61E-05 | 0.000351 | 551.3018 | 463.6578 | 540.5833 | 348.2118 | 333.7013 | 342.698  |
| 23367 | LOC103237 | 5.257678 | -0.60194 | 1.194807 | -0.5038  | 0.614404 | 0.698987 | 4.878777 | 2.737059 | 11.1317  | 2.232127 | 8.556443 | 2.009959 |
| 3207  | PLAU      | 3492.15  | -0.60209 | 0.097832 | -6.15432 | 7.54E-10 | 6.25E-09 | 4245.62  | 4172.373 | 4221.002 | 2792.391 | 2532.707 | 2988.809 |
| 2837  | EEF2      | 115728   | -0.60225 | 0.090785 | -6.6338  | 3.27E-11 | 3.07E-10 | 137410.2 | 144328.4 | 136885.8 | 91840.86 | 84529.1  | 99373.37 |
| 11153 | LOC119627 | 153.6913 | -0.60259 | 0.232515 | -2.5916  | 0.009553 | 0.022771 | 197.3194 | 187.2148 | 168.367  | 138.3919 | 128.3466 | 102.5079 |
| 7255  | LOC119627 | 530.096  | -0.60307 | 0.165191 | -3.65078 | 0.000261 | 0.000958 | 677.608  | 567.1186 | 674.8594 | 477.6752 | 340.1186 | 443.1959 |
| 2893  | GSTCD     | 2204.935 | -0.60316 | 0.091959 | -6.559   | 5.42E-11 | 4.98E-10 | 2667.065 | 2613.344 | 2697.351 | 1783.469 | 1717.706 | 1750.674 |
| 7344  | LOC119627 | 911.8986 | -0.6034  | 0.16677  | -3.61816 | 0.000297 | 0.001074 | 1351.963 | 904.8717 | 1042.901 | 640.6204 | 806.4447 | 724.5902 |
| 3720  | TTC4      | 1749.512 | -0.60353 | 0.107362 | -5.62149 | 1.89E-08 | 1.35E-07 | 2044.208 | 2256.979 | 2030.84  | 1453.115 | 1289.884 | 1422.046 |
| 17239 | LOC103219 | 56.71196 | -0.60371 | 0.413295 | -1.46072 | 0.144093 | 0.222212 | 86.19173 | 45.43518 | 72.35606 | 37.94616 | 64.17332 | 34.1693  |
| 4423  | NUP35     | 1182.224 | -0.6038  | 0.11927  | -5.0625  | 4.14E-07 | 2.49E-06 | 1388.768 | 1519.615 | 1383.114 | 984.368  | 988.2691 | 849.2077 |
| 14393 | LOC119627 | 75.13767 | -0.6039  | 0.310547 | -1.94463 | 0.05182  | 0.095716 | 93.23886 | 81.01695 | 98.09812 | 66.96381 | 49.19955 | 62.30873 |
| 3137  | JPT1      | 2560.64  | -0.60399 | 0.096847 | -6.2366  | 4.47E-10 | 3.79E-09 | 3243.845 | 2901.283 | 3124.53  | 1975.432 | 2036.433 | 2082.317 |
| 6754  | HASPIN    | 495.8196 | -0.60404 | 0.157505 | -3.83504 | 0.000126 | 0.000494 | 568.6486 | 639.9244 | 587.1973 | 441.9611 | 325.1448 | 412.0416 |
| 2900  | NOP56     | 8380.654 | -0.60424 | 0.092259 | -6.54945 | 5.77E-11 | 5.29E-10 | 9983.605 | 10494.98 | 9861.296 | 6582.542 | 6197.004 | 7164.499 |
| 4396  | ELP2      | 2741.111 | -0.6043  | 0.118885 | -5.0831  | 3.71E-07 | 2.25E-06 | 3671.551 | 2865.153 | 3388.908 | 2116.056 | 2083.494 | 2321.503 |
| 17941 | LOC119618 | 34.21141 | -0.60497 | 0.44721  | -1.35276 | 0.176133 | 0.260979 | 47.16151 | 35.58177 | 40.35242 | 31.24978 | 27.80844 | 23.11453 |
| 5546  | H2AFX     | 2301.514 | -0.60505 | 0.137728 | -4.39305 | 1.12E-05 | 5.36E-05 | 2919.135 | 2298.035 | 3110.615 | 2060.253 | 1732.68  | 1688.366 |
| 6130  | LRRFIP1   | 8116.984 | -0.60521 | 0.147455 | -4.10438 | 4.05E-05 | 0.000176 | 8468.473 | 12588.28 | 8328.6   | 6399.508 | 6342.463 | 6574.576 |
| 4061  | MRPS15    | 5078.699 | -0.60526 | 0.113674 | -5.32454 | 1.01E-07 | 6.63E-07 | 5523.86  | 7023.294 | 5834.403 | 4218.72  | 4060.032 | 3811.887 |
| 8305  | PGBD1     | 265.1148 | -0.60534 | 0.182778 | -3.31186 | 0.000927 | 0.002967 | 308.4471 | 343.7746 | 308.209  | 183.0344 | 233.1631 | 214.0606 |
| 14820 | LOC103247 | 68.54045 | -0.60537 | 0.324009 | -1.86836 | 0.061712 | 0.110702 | 94.32303 | 71.71095 | 81.40057 | 55.80317 | 57.75599 | 50.24897 |
| 3423  | MSH3      | 1677.083 | -0.60539 | 0.102225 | -5.92207 | 3.18E-09 | 2.47E-08 | 2018.73  | 2091.113 | 1957.788 | 1412.936 | 1300.579 | 1281.349 |
| 4535  | ASAP2     | 4188.735 | -0.60552 | 0.121297 | -4.99201 | 5.98E-07 | 3.50E-06 | 4562.199 | 5948.724 | 4656.53  | 3328.101 | 3178.718 | 3458.134 |
| 2965  | AURKA     | 2459.239 | -0.60561 | 0.093591 | -6.47086 | 9.74E-11 | 8.74E-10 | 3015.084 | 2997.08  | 2890.068 | 2044.628 | 1876     | 1932.576 |
| 20198 | CUNH9orf1 | 18.45105 | -0.60591 | 0.607791 | -0.99691 | 0.318808 | 0.419621 | 24.39389 | 19.15941 | 23.65487 | 17.85702 | 8.556443 | 17.08465 |
| 20926 | CCDC68    | 18.67633 | -0.60622 | 0.683324 | -0.88716 | 0.374994 | 0.476404 | 18.97302 | 22.9913  | 24.3506  | 29.01765 | 10.69555 | 6.029877 |
| 20667 | LOC119618 | 15.91851 | -0.60626 | 0.65431  | -0.26656 | 0.354155 | 0.455567 | 17.88885 | 20.80165 | 18.08902 | 17.85702 | 12.83466 | 8.039836 |
| 2153  | RBM3      | 9173.832 | -0.60642 | 0.079009 | -7.67535 | 1.65E-14 | 2.04E-13 | 11319.85 | 11017.21 | 10881.93 | 7316.912 | 7360.68  | 7146.409 |
| 12556 | CFAP53    | 177.8085 | -0.60642 | 0.264551 | -2.29227 | 0.02189  | 0.046348 | 185.9356 | 292.3179 | 164.8883 | 136.1597 | 151.8769 | 135.6722 |
| 3455  | CMTM4     | 6730.252 | -0.60644 | 0.10284  | -5.89689 | 3.70E-09 | 2.85E-08 | 8319.4   | 8028.889 | 8034.306 | 5334.783 | 4748.826 | 5915.309 |
| 18806 | HPCAL4    | 38.10151 | -0.60668 | 0.498695 | -1.21653 | 0.223784 |          |          |          |          |          |          |          |



|       |           |          |          |          |          |          |          |          |          |          |          |          |          |
|-------|-----------|----------|----------|----------|----------|----------|----------|----------|----------|----------|----------|----------|----------|
| 23012 | LOC119621 | 7.099953 | -0.60775 | 1.084812 | -0.56023 | 0.575321 | 0.664649 | 6.505036 | 2.737059 | 16.00182 | 8.928508 | 6.417332 | 2.009959 |
| 22888 | LOC119620 | 5.796528 | -0.60807 | 1.046358 | -0.58113 | 0.56115  | 0.651791 | 8.673382 | 5.474118 | 6.957314 | 2.232127 | 6.417332 | 5.024897 |
| 24047 | LOC119625 | 3.189972 | -0.60809 | 1.524705 | -0.39883 | 0.690021 | 0.762848 | 1.084173 | 6.02153  | 4.87012  | 0        | 2.139111 | 5.024897 |
| 11625 | DNAI4     | 164.5083 | -0.60819 | 0.244524 | -2.48726 | 0.012873 | 0.029433 | 179.9727 | 209.6587 | 203.1536 | 122.767  | 168.9897 | 102.5079 |
| 23493 | LOC119625 | 4.495512 | -0.60831 | 1.252609 | -0.48564 | 0.627225 | 0.709776 | 1.626259 | 9.853413 | 4.87012  | 4.464254 | 2.139111 | 4.019918 |
| 12968 | CAB39L    | 112.2443 | -0.60833 | 0.275326 | -2.20948 | 0.027141 | 0.055641 | 130.1007 | 149.4434 | 130.1018 | 84.82083 | 68.45154 | 110.5477 |
| 23234 | TRNAC-GC  | 4.847952 | -0.60838 | 1.160973 | -0.52403 | 0.600261 | 0.686836 | 3.794605 | 8.758589 | 4.87012  | 2.232127 | 6.417332 | 3.014938 |
| 4372  | CCDC86    | 1320.22  | -0.60849 | 0.119332 | -5.09913 | 3.41E-07 | 2.07E-06 | 1544.946 | 1691.503 | 1554.96  | 955.3503 | 1011.799 | 1162.761 |
| 19261 | LOC103237 | 25.72161 | -0.60849 | 0.532455 | -1.14281 | 0.253119 | 0.349382 | 23.30971 | 39.96106 | 29.22072 | 20.08914 | 25.66933 | 16.07967 |
| 15027 | PCDHB3    | 64.46682 | -0.60854 | 0.332889 | -1.82806 | 0.067541 | 0.119489 | 65.59245 | 83.75401 | 84.87923 | 49.10679 | 49.19955 | 54.26889 |
| 21139 | LOC103238 | 20.23512 | -0.60887 | 0.708313 | -0.85961 | 0.390003 | 0.490456 | 33.06727 | 16.42235 | 22.95914 | 6.696381 | 34.22577 | 8.039836 |
| 12821 | ICAM3     | 115.6791 | -0.60894 | 0.27252  | -2.23446 | 0.025453 | 0.052778 | 147.4475 | 125.9047 | 146.1036 | 113.8385 | 66.31243 | 94.46807 |
| 4907  | SF1       | 968.0276 | -0.60895 | 0.128475 | -4.7398  | 2.14E-06 | 1.16E-05 | 1199.095 | 1080.044 | 1235.619 | 698.6557 | 746.5496 | 848.2027 |
| 3658  | RAD54B    | 1504.917 | -0.60908 | 0.107021 | -5.69127 | 1.26E-08 | 9.16E-08 | 1762.865 | 1952.071 | 1741.416 | 1174.099 | 1167.954 | 1231.1   |
| 6502  | LRRC20    | 619.4633 | -0.60918 | 0.154614 | -3.93999 | 8.15E-05 | 0.000333 | 808.7929 | 651.4201 | 790.3508 | 439.729  | 472.7435 | 553.7437 |
| 4361  | RSL24D1   | 2262.852 | -0.60929 | 0.119327 | -5.10605 | 3.29E-07 | 2.01E-06 | 2700.674 | 2434.888 | 3061.914 | 1779.005 | 1927.339 | 1673.291 |
| 2881  | IPO7      | 25370.32 | -0.60946 | 0.092695 | -6.57491 | 4.87E-11 | 4.49E-10 | 29229.3  | 33779.69 | 28944.51 | 20138.25 | 19763.24 | 20366.91 |
| 7471  | LOC103228 | 355.7837 | -0.60947 | 0.170616 | -3.57218 | 0.000354 | 0.00126  | 429.3324 | 385.3779 | 474.4888 | 256.6946 | 314.4493 | 274.3594 |
| 24750 | LUZP2     | 1.7688   | -0.60961 | 2.107742 | -0.28923 | 0.772408 | 0.829676 | 2.168345 | 3.284471 | 0.695731 | 4.464254 | 0        | 0        |
| 3402  | AFAP1L1   | 2643.654 | -0.60986 | 0.102607 | -5.94364 | 2.79E-09 | 2.18E-08 | 3160.906 | 3406.544 | 3021.561 | 2022.307 | 2006.486 | 2244.119 |
| 24151 | LOC119620 | 2.641369 | -0.60999 | 1.59329  | -0.38285 | 0.701832 | 0.772564 | 4.336691 | 3.831883 | 1.391463 | 0        | 4.278221 | 2.009959 |
| 20857 | TRNAC-AC  | 15.27853 | -0.61005 | 0.679919 | -0.89724 | 0.369592 | 0.471094 | 16.26259 | 13.13788 | 26.43779 | 8.928508 | 12.83466 | 14.06971 |
| 4043  | NCAPG2    | 5471.982 | -0.61012 | 0.11427  | -5.33931 | 9.33E-08 | 6.13E-07 | 6167.859 | 7670.334 | 5999.987 | 4299.077 | 4220.465 | 4474.169 |
| 7804  | POLR1H    | 1174.356 | -0.61019 | 0.176159 | -3.46386 | 0.000532 | 0.001814 | 1605.118 | 1021.47  | 1634.273 | 892.8508 | 866.3398 | 1026.084 |
| 5297  | TNFRSF12A | 8164.901 | -0.61032 | 0.135038 | -4.51959 | 6.20E-06 | 3.11E-05 | 11033.63 | 7933.639 | 10638.43 | 6415.133 | 5831.216 | 7137.364 |
| 16654 | TRNAD-GU  | 51.7198  | -0.61037 | 0.394451 | -1.54738 | 0.121772 | 0.194386 | 70.47123 | 45.98259 | 72.35606 | 40.17829 | 32.08666 | 49.24399 |
| 6641  | IFT43     | 749.1667 | -0.61069 | 0.157328 | -3.88164 | 0.000104 | 0.000415 | 994.7285 | 732.437  | 992.1129 | 544.639  | 598.951  | 632.1321 |
| 4734  | TFB1M     | 1557.163 | -0.61075 | 0.125694 | -4.859   | 1.18E-06 | 6.63E-06 | 1985.12  | 1602.822 | 2059.365 | 1191.956 | 1253.519 | 1250.194 |
| 5212  | YES1      | 5539.268 | -0.61108 | 0.133626 | -4.5731  | 4.81E-06 | 2.45E-05 | 6026.374 | 8239.643 | 5818.401 | 4352.648 | 4460.046 | 4338.496 |
| 23760 | LOC119615 | 3.14929  | -0.61135 | 1.378001 | -0.44365 | 0.657298 | 0.735449 | 3.252518 | 5.474118 | 2.782925 | 2.232127 | 2.139111 | 3.014938 |
| 3842  | BOK       | 2943.159 | -0.61142 | 0.111112 | -5.5027  | 3.74E-08 | 2.59E-07 | 3872.665 | 3212.76  | 3592.757 | 2341.501 | 2151.945 | 2487.324 |
| 8847  | RPS28     | 5078.538 | -0.61143 | 0.193648 | -3.15742 | 0.001592 | 0.004783 | 7167.466 | 3795.206 | 7456.153 | 3984.347 | 3779.809 | 4288.247 |
| 5325  | LOC103225 | 2266.27  | -0.61147 | 0.135677 | -4.50682 | 6.58E-06 | 3.29E-05 | 3033.515 | 2211.544 | 2975.643 | 1678.559 | 1848.192 | 1850.167 |
| 8310  | GRHL1     | 282.6939 | -0.61156 | 0.184705 | -3.31102 | 0.00093  | 0.002974 | 350.1878 | 348.1539 | 330.4724 | 180.8023 | 235.3022 | 251.2449 |
| 4117  | PPAN      | 1673.739 | -0.61181 | 0.11588  | -5.27967 | 1.29E-07 | 8.36E-07 | 1907.06  | 2184.173 | 1984.922 | 1328.116 | 1200.041 | 1438.126 |
| 23693 | LOC103240 | 4.388327 | -0.61195 | 1.346878 | -0.45435 | 0.64958  | 0.728869 | 6.505036 | 3.284471 | 5.565851 | 6.696381 | 4.278221 | 0        |
| 4715  | KRR1      | 2574.983 | -0.61201 | 0.125569 | -4.8739  | 1.09E-06 | 6.17E-06 | 2826.438 | 3684.082 | 2829.539 | 2006.682 | 2027.877 | 2075.283 |
| 2992  | VRK2      | 2446.225 | -0.61207 | 0.095065 | -6.43851 | 1.21E-10 | 1.07E-09 | 2874.684 | 3098.351 | 2903.287 | 1879.451 | 1916.643 | 2004.934 |
| 3876  | SPPL2A    | 2238.408 | -0.61234 | 0.111913 | -5.47158 | 4.46E-08 | 3.06E-07 | 2568.405 | 2936.317 | 2622.212 | 1654.006 | 1704.871 | 1944.635 |
| 5705  | YBEY      | 620.7371 | -0.61278 | 0.141705 | -4.32433 | 1.53E-05 | 7.13E-05 | 744.8267 | 818.3807 | 690.1655 | 517.8535 | 440.6568 | 512.5395 |
| 3663  | LOC103247 | 2220.095 | -0.61297 | 0.107833 | -5.68444 | 1.31E-08 | 9.53E-08 | 2560.274 | 2956.024 | 2539.42  | 1665.167 | 1811.827 | 1787.858 |
| 23345 | LOC119615 | 5.528873 | -0.61312 | 1.209403 | -0.50696 | 0.612183 | 0.697147 | 4.878777 | 7.663765 | 8.348776 | 2.232127 | 0        | 10.04979 |
| 2505  | LAYN      | 6188.844 | -0.61321 | 0.086067 | -7.12475 | 1.04E-12 | 1.11E-11 | 7423.873 | 7829.631 | 7204.298 | 4776.752 | 4851.503 | 5047.007 |
| 5697  | SNRPE     | 2220.316 | -0.61331 | 0.141712 | -4.32782 | 1.51E-05 | 7.03E-05 | 3008.037 | 2128.885 | 2922.767 | 1723.202 | 1655.672 | 1883.332 |
| 5382  | POC5      | 493.563  | -0.61339 | 0.137102 | -4.47397 | 7.68E-06 | 3.79E-05 | 590.3321 | 619.6702 | 580.24   | 390.6222 | 393.5964 | 386.9171 |
| 4323  | KLHDC4    | 1298.25  | -0.61383 | 0.119414 | -5.14038 | 2.74E-07 | 1.69E-06 | 1542.778 | 1673.438 | 1499.301 | 1060.26  | 911.2611 | 1102.462 |
| 14322 | LOC103247 | 95.42485 | -0.6141  | 0.313681 | -1.95772 | 0.050263 | 0.0933   | 92.69677 | 145.6115 | 107.1426 | 62.49956 | 96.25998 | 68.3386  |
| 3669  | MAP3K14   | 2801.327 | -0.61453 | 0.108156 | -5.68184 | 1.33E-08 | 9.66E-08 | 3346.299 | 3509.457 | 3321.422 | 2004.45  | 2154.084 | 2472.249 |
| 5206  | ELK4      | 4097.268 | -0.61454 | 0.134332 | -4.5748  | 4.77E-06 | 2.43E-05 | 4333.981 | 6036.31  | 4503.469 | 3205.334 | 3067.485 | 3437.03  |
| 5000  | NDC80     | 1073.622 | -0.61466 | 0.131111 | -4.68809 | 2.76E-06 | 1.47E-05 | 1178.496 | 1493.887 | 1223.791 | 837.0476 | 866.3398 | 842.1728 |
| 3635  | TMEM168   | 1127.192 | -0.61492 | 0.107726 | -5.70822 | 1.14E-08 | 8.35E-08 | 1373.647 | 1401.922 | 1317.715 | 872.7616 | 885.5918 | 911.5164 |
| 2908  | HNRNPL    | 13914.67 | -0.61499 | 0.094076 | -6.53713 | 6.27E-11 | 5.73E-10 | 17575.52 | 16298.64 | 16644.68 | 10725.37 | 10246.34 | 11997.44 |
| 3774  | ZWILCH    | 2348.673 | -0.6151  | 0.110407 | -5.57118 | 2.53E-08 | 1.78E-07 | 2976.596 | 2508.788 | 3041.738 | 1812.487 | 1878.139 | 1874.287 |
| 7460  | SLTM      | 4680.275 | -0.61551 | 0.172026 | -3.57799 | 0.000346 | 0.001234 | 4740.003 | 7721.791 | 4529.907 | 3602.653 | 3698.522 | 3788.773 |
| 7592  | ITGB3     | 29877.86 | -0.61551 | 0.091731 | -6.70998 | 1.95E-11 | 1.85E-10 | 36862.96 | 36910.88 | 34705.86 | 22783.32 | 22442.47 | 25761.64 |
| 7547  | DNAAF2    | 494.3604 | -0.61593 | 0.173798 | -3.54393 | 0.000394 | 0.001389 | 655.3824 | 476.7957 | 663.032  | 419.6399 | 359.3706 | 391.942  |
| 23576 | LOC119620 | 3.913444 | -0.61612 | 1.303775 | -0.47256 | 0.636524 | 0.717763 | 5.420864 | 4.926706 | 3.478657 | 2.232127 | 6.417332 | 1.004979 |
| 4522  | RBMS2     | 1180.941 | -0.6162  | 0.123217 | -5.00093 | 5.71E-07 | 3.35E-06 | 1370.394 | 1606.106 | 1309.366 | 955.3503 | 936.9305 | 907.4965 |
| 4719  | AADAT     | 839.9076 | -0.6167  | 0.126621 | -4.87044 | 1.11E-06 | 6.27E-06 | 975.2134 | 1107.414 | 969.8495 | 676.3345 | 618.203  | 692.4309 |
| 12857 | LOC119615 | 102.6218 | -0.61685 | 0.276929 | -2.22746 | 0.025917 | 0.053589 | 141.4845 | 116.0513 | 116.1871 | 64.73168 | 89.84265 | 87.43321 |
| 3069  | ANKLE2    | 6327.076 | -0.61726 | 0.097793 | -6.31198 | 2.75E-10 | 2.39E-09 | 7801.707 | 7756.825 | 7432.498 | 4857.108 | 4614.062 | 5500.253 |
| 2759  | NUP88     | 2940.197 | -0.61742 | 0.091345 | -6.75919 | 1.39E-11 | 1.34E-10 | 3690.524 | 3548.871 | 3443.87  | 2296.859 | 2263.179 | 2397.881 |
| 11781 | LOC119620 | 232.5578 | -0.61753 | 0.251762 | -2.45283 | 0.014174 | 0.031985 | 307.363  | 194.3312 | 345.7785 | 180.8023 | 154.016  | 213.0556 |
| 3746  | URB1      | 2658.118 | -0.61753 | 0.110331 | -5.5971  | 2.18E-08 | 1.55E-07 | 3446.585 | 3004.743 | 3212.192 | 2035.7   | 1938.034 | 2311.453 |
| 9069  | LOC103215 | 297.6273 | -0.61766 | 0.199829 | -3.09093 | 0.001995 | 0.005849 | 316.5784 | 437.9295 | 329.0809 | 207.5878 | 235.3022 | 259.2847 |
| 17442 | TMEM255I  | 36.75231 | -0.61799 | 0.435378 | -1.41942 | 0.155776 | 0.237433 | 40.65648 | 38.86624 | 53.57132 | 33.4819  | 27.80844 | 26.12947 |
| 14901 | LOC119620 | 111.0214 | -0.61826 | 0.333354 | -1.85466 | 0.063644 | 0.113549 | 163.168  | 96.34448 | 147.4951 | 69.19594 | 66.31243 | 123.6125 |
| 20187 | LOC119620 | 17.40231 | -0.61849 | 0.619148 | -0.99893 | 0.317827 | 0.418558 | 16.26259 | 23.53871 | 22.95914 | 15.62489 | 14.97377 | 11.05477 |
| 2927  | LANCL1    | 2657.811 | -0.6185  | 0.094923 | -6.51578 | 7.23E-11 | 6.57E-10 | 3347.925 | 3158.566 | 3155.837 | 2006.682 | 2074.937 | 2202.915 |
| 10449 | LOC103247 | 145.97   | -0.61892 | 0.224612 | -2.75551 | 0.00586  | 0.01491  | 170.2151 | 171.8873 | 189.2389 | 109.3742 | 115.512  | 119.5926 |
| 6636  | PHF12     | 1747.246 | -0.61902 | 0.15929  | -3.88609 | 0.000102 | 0.0004   |          |          |          |          |          |          |



|       |           |          |          |          |          |          |          |          |          |          |          |          |          |
|-------|-----------|----------|----------|----------|----------|----------|----------|----------|----------|----------|----------|----------|----------|
| 6261  | MRPL57    | 1529.579 | -0.6197  | 0.1532   | -4.04506 | 5.23E-05 | 0.000222 | 1963.437 | 1441.335 | 2154.68  | 1301.33  | 1118.755 | 1197.936 |
| 14319 | RBM20     | 89.01304 | -0.62004 | 0.316679 | -1.95794 | 0.050237 | 0.093272 | 87.27591 | 136.853  | 98.79385 | 60.26743 | 85.56443 | 65.32367 |
| 20391 | LOC119621 | 17.33281 | -0.62016 | 0.643925 | -0.96309 | 0.335502 | 0.437415 | 26.56223 | 14.78012 | 20.87194 | 15.62489 | 17.11289 | 9.044815 |
| 21376 | LOC103224 | 15.92983 | -0.62018 | 0.755809 | -0.82055 | 0.411901 | 0.512275 | 22.22554 | 8.758589 | 27.82925 | 13.39276 | 4.278221 | 19.09461 |
| 6028  | SRD5A1    | 451.3472 | -0.62029 | 0.149371 | -4.15267 | 3.29E-05 | 0.000145 | 557.8069 | 584.0884 | 500.2309 | 357.1403 | 337.9795 | 370.8374 |
| 3503  | TTF2      | 3665.804 | -0.62033 | 0.106021 | -5.85103 | 4.89E-09 | 3.71E-08 | 4497.691 | 4746.06  | 4089.509 | 2698.642 | 2819.348 | 3143.576 |
| 7479  | LOC119620 | 1958.21  | -0.62057 | 0.173821 | -3.57019 | 0.000357 | 0.001268 | 2007.888 | 3174.441 | 1938.308 | 1529.007 | 1452.456 | 1647.161 |
| 2853  | SLC25A6   | 20042.71 | -0.621   | 0.093979 | -6.60789 | 3.90E-11 | 3.63E-10 | 24996.14 | 21988.99 | 25890.25 | 16084.71 | 15198.38 | 16097.76 |
| 4283  | RNMT      | 2975.489 | -0.62101 | 0.120233 | -5.16507 | 2.40E-07 | 1.49E-06 | 3490.494 | 4098.472 | 3234.455 | 2332.573 | 2158.363 | 2538.578 |
| 20994 | PKDREJ    | 13.00376 | -0.62103 | 0.706152 | -0.87946 | 0.37915  | 0.480124 | 17.88885 | 13.13788 | 16.00182 | 13.39276 | 8.556443 | 9.044815 |
| 10432 | LOC119625 | 494.5679 | -0.62131 | 0.225092 | -2.76024 | 0.005776 | 0.014719 | 505.2245 | 825.497  | 466.14   | 339.2833 | 468.4652 | 362.7976 |
| 4039  | MYBL2     | 4399.311 | -0.6215  | 0.116277 | -5.34496 | 9.04E-08 | 5.95E-07 | 4992.615 | 6094.336 | 4916.038 | 3399.529 | 3240.753 | 3752.593 |
| 3097  | CSNK1G3   | 3412.797 | -0.62157 | 0.098897 | -6.28498 | 3.28E-10 | 2.81E-09 | 3964.278 | 4487.682 | 3953.841 | 2741.052 | 2755.175 | 2574.757 |
| 22632 | LOC119618 | 7.60678  | -0.62176 | 1.005394 | -0.61843 | 0.536294 | 0.629954 | 15.7205  | 2.737059 | 9.044508 | 6.696381 | 6.417332 | 5.024897 |
| 3991  | BYSL      | 1520.46  | -0.62188 | 0.115582 | -5.3804  | 7.43E-08 | 4.95E-07 | 1952.595 | 1811.386 | 1772.028 | 1071.421 | 1212.876 | 1302.453 |
| 3278  | EIF3B     | 10227.75 | -0.62193 | 0.102669 | -6.0576  | 1.38E-09 | 1.12E-08 | 12866.42 | 12452.52 | 11887.96 | 7830.301 | 7313.619 | 9015.671 |
| 20321 | LOC103236 | 17.83711 | -0.62199 | 0.638224 | -0.97457 | 0.329774 | 0.431428 | 22.22554 | 29.01283 | 13.2189  | 13.39276 | 17.11289 | 12.05975 |
| 6066  | PABPC1L   | 451.5617 | -0.62224 | 0.150315 | -4.13958 | 3.48E-05 | 0.000153 | 580.0324 | 507.4508 | 555.1936 | 325.8905 | 385.0399 | 355.7627 |
| 4417  | MPP3      | 1282.152 | -0.62232 | 0.122763 | -5.06931 | 3.99E-07 | 2.40E-06 | 1718.414 | 1453.378 | 1497.214 | 957.5825 | 966.878  | 1099.448 |
| 5763  | LOC103241 | 1616.363 | -0.62243 | 0.144964 | -4.29367 | 1.76E-05 | 8.11E-05 | 1776.959 | 2368.104 | 1733.763 | 1156.242 | 1396.839 | 1266.274 |
| 5107  | CAST      | 17269.44 | -0.62245 | 0.134603 | -4.62438 | 3.76E-06 | 1.96E-05 | 18116.53 | 26003.7  | 18696.39 | 13316.87 | 13249.65 | 14233.52 |
| 3247  | FBXO10    | 3160.389 | -0.62271 | 0.102055 | -6.10168 | 1.05E-09 | 8.59E-09 | 4013.607 | 3773.31  | 3715.206 | 2542.393 | 2254.623 | 2663.196 |
| 2929  | FTSJ1     | 2769.911 | -0.62276 | 0.095631 | -6.51208 | 7.41E-11 | 6.73E-10 | 3340.878 | 3486.466 | 3254.631 | 2078.11  | 2151.945 | 2307.433 |
| 8081  | SNF74     | 342.6117 | -0.62309 | 0.18392  | -3.38786 | 0.000704 | 0.002317 | 431.5008 | 364.0289 | 453.6169 | 218.7484 | 297.3364 | 290.4391 |
| 18758 | LOC119620 | 35.18643 | -0.62317 | 0.509246 | -1.22372 | 0.221058 | 0.313298 | 62.33993 | 24.08612 | 42.43961 | 24.5534  | 23.53022 | 34.1693  |
| 5528  | TK1       | 3611.792 | -0.62355 | 0.141698 | -4.40054 | 1.08E-05 | 5.19E-05 | 4930.818 | 3600.875 | 4617.569 | 2631.678 | 2590.463 | 3299.348 |
| 9504  | LOC103236 | 173.6718 | -0.62361 | 0.209024 | -2.98344 | 0.00285  | 0.007973 | 206.5349 | 217.8699 | 207.3279 | 149.5525 | 124.0684 | 136.6772 |
| 14541 | ZSCAN31   | 67.08478 | -0.62381 | 0.325294 | -1.91768 | 0.055152 | 0.100827 | 80.22878 | 84.84883 | 77.92191 | 49.10679 | 64.17332 | 46.22906 |
| 3984  | POGK      | 3144.29  | -0.62413 | 0.115887 | -5.38571 | 7.22E-08 | 4.82E-07 | 3644.447 | 4309.773 | 3491.18  | 2537.928 | 2267.457 | 2614.957 |
| 6491  | RP9       | 822.7859 | -0.62449 | 0.158321 | -3.94446 | 8.00E-05 | 0.000328 | 908.5368 | 1188.431 | 891.9276 | 691.9594 | 693.0719 | 562.7885 |
| 3851  | FASTKD1   | 1041.978 | -0.62455 | 0.113618 | -5.49688 | 3.87E-08 | 2.67E-07 | 1346     | 1210.328 | 1234.227 | 837.0476 | 819.2794 | 804.9886 |
| 3972  | ANKRA2    | 1142.765 | -0.62462 | 0.115709 | -5.39819 | 6.73E-08 | 4.51E-07 | 1414.845 | 1271.638 | 1470.776 | 901.7793 | 926.2349 | 871.3172 |
| 4724  | APOL5     | 790.7985 | -0.62474 | 0.128359 | -4.86714 | 1.13E-06 | 6.37E-06 | 912.8734 | 1049.388 | 912.7996 | 633.9241 | 643.8723 | 591.9329 |
| 3199  | SPCS3     | 5142.635 | -0.62476 | 0.10138  | -6.16253 | 7.16E-10 | 5.95E-09 | 6691.514 | 5549.661 | 6476.563 | 4071.4   | 4006.554 | 4060.117 |
| 8434  | TMEM251   | 483.4256 | -0.62478 | 0.190893 | -3.27292 | 0.001064 | 0.003355 | 678.6921 | 452.7096 | 632.4198 | 337.0512 | 361.5097 | 438.171  |
| 22688 | LOC119625 | 8.935182 | -0.625   | 1.025008 | -0.60975 | 0.542028 | 0.635156 | 12.46799 | 1.642235 | 18.08902 | 6.696381 | 10.69555 | 4.019918 |
| 18756 | CDSN      | 37.81559 | -0.62516 | 0.510817 | -1.22384 | 0.221014 | 0.313252 | 44.45108 | 54.19377 | 36.87376 | 31.24978 | 47.06043 | 13.06473 |
| 3040  | USP1      | 4900.068 | -0.62546 | 0.098501 | -6.34981 | 2.16E-10 | 1.88E-09 | 5609.51  | 6526.791 | 5702.91  | 3707.563 | 3940.242 | 3913.39  |
| 18293 | LEKR1     | 29.43107 | -0.62594 | 0.487241 | -1.28465 | 0.198914 | 0.28908  | 33.06727 | 37.77142 | 35.4823  | 20.08914 | 32.08666 | 18.08963 |
| 13424 | LOC119615 | 147.9143 | -0.62612 | 0.295039 | -2.12217 | 0.033824 | 0.066985 | 222.2554 | 120.978  | 197.5877 | 87.05295 | 121.9293 | 137.6822 |
| 4214  | CNOT1     | 16834.24 | -0.62614 | 0.120221 | -5.20822 | 1.91E-07 | 1.20E-06 | 18726.37 | 23851.28 | 18722.13 | 12600.36 | 12500.96 | 14604.36 |
| 4006  | ZNF248    | 1367.2   | -0.62624 | 0.116643 | -5.36883 | 7.92E-08 | 5.26E-07 | 1550.367 | 1826.713 | 1602.269 | 1111.599 | 1011.799 | 1100.453 |
| 4588  | WDR77     | 1760.728 | -0.6263  | 0.126519 | -4.95021 | 7.41E-07 | 4.30E-06 | 2322.84  | 1941.67  | 2154.68  | 1332.58  | 1242.823 | 1569.778 |
| 3434  | EIF2AK4   | 7528.427 | -0.62645 | 0.105905 | -5.91523 | 3.31E-09 | 2.57E-08 | 8864.196 | 10187.88 | 8366.865 | 5738.798 | 5664.365 | 6348.455 |
| 2559  | CCZ1      | 4022.009 | -0.62647 | 0.089053 | -7.03476 | 2.00E-12 | 2.07E-11 | 4878.235 | 5122.132 | 4644.007 | 3183.013 | 3153.049 | 3151.616 |
| 6173  | CUNH10or  | 639.6068 | -0.62665 | 0.153248 | -4.08912 | 4.33E-05 | 0.000186 | 816.9242 | 645.3985 | 866.1856 | 497.7643 | 521.943  | 489.425  |
| 5681  | NBL1      | 1269.059 | -0.62669 | 0.144525 | -4.33623 | 1.45E-05 | 6.78E-05 | 1691.309 | 1313.788 | 1623.141 | 964.2789 | 879.1745 | 1142.662 |
| 2780  | PGAP1     | 2972.715 | -0.62673 | 0.093089 | -6.73259 | 1.67E-11 | 1.59E-10 | 3691.066 | 3560.914 | 3579.538 | 2209.806 | 2333.77  | 2461.195 |
| 2978  | PARD3     | 6148.196 | -0.6268  | 0.097152 | -6.4518  | 1.11E-10 | 9.87E-10 | 7473.203 | 7909.553 | 7014.364 | 4689.699 | 4590.531 | 5211.824 |
| 13761 | LOC103216 | 127.6926 | -0.62693 | 0.305107 | -2.05478 | 0.0399   | 0.077083 | 137.1479 | 200.9001 | 124.5359 | 89.28508 | 66.9031  | 77.38342 |
| 7496  | CFAP20DC  | 402.2355 | -0.62709 | 0.176052 | -3.56193 | 0.000368 | 0.001306 | 426.0799 | 575.8772 | 461.2699 | 348.2118 | 299.4755 | 302.4988 |
| 24369 | LOC119618 | 2.597267 | -0.62714 | 1.78602  | -0.35114 | 0.725483 | 0.791455 | 3.794605 | 3.284471 | 2.087194 | 0        | 6.417332 | 0        |
| 2876  | RPL21     | 32615.54 | -0.62745 | 0.095348 | -6.58065 | 4.68E-11 | 4.33E-10 | 38804.17 | 37946.04 | 42035.39 | 26452.94 | 27160.29 | 23294.42 |
| 4026  | ITGA1     | 12538.88 | -0.62782 | 0.117264 | -5.35389 | 8.61E-08 | 5.68E-07 | 13941.38 | 17931.57 | 13804.7  | 9441.897 | 9805.683 | 10308.07 |
| 4367  | UBXN1     | 3185.99  | -0.62805 | 0.123094 | -5.10217 | 3.36E-07 | 2.04E-06 | 3515.972 | 4564.32  | 3524.575 | 2459.804 | 2584.046 | 2467.225 |
| 4587  | RWDD1     | 3394.639 | -0.62848 | 0.126945 | -4.95079 | 7.39E-07 | 4.28E-06 | 3636.315 | 4839.668 | 3886.355 | 2767.837 | 2791.539 | 2446.12  |
| 4599  | FCF1      | 1291.957 | -0.62855 | 0.127158 | -4.94311 | 7.69E-07 | 4.44E-06 | 1466.886 | 1758.287 | 1487.474 | 984.368  | 941.2087 | 1113.517 |
| 4091  | ASB1      | 3036.436 | -0.62869 | 0.118548 | -5.3033  | 1.14E-07 | 7.39E-07 | 3931.21  | 3460.737 | 3680.419 | 2359.358 | 2083.494 | 2703.395 |
| 2807  | PIGS      | 3255.664 | -0.62872 | 0.094035 | -6.68597 | 2.29E-11 | 2.17E-10 | 3962.651 | 4118.179 | 3786.866 | 2506.679 | 2464.255 | 2695.355 |
| 6401  | DCLRE1B   | 727.8717 | -0.62893 | 0.158031 | -3.97978 | 6.90E-05 | 0.000286 | 807.7087 | 1040.63  | 807.0484 | 593.7458 | 491.9955 | 626.1022 |
| 3212  | VRK3      | 1766.194 | -0.62895 | 0.10225  | -6.15115 | 7.69E-10 | 6.37E-09 | 2232.854 | 2050.057 | 2156.767 | 1390.615 | 1317.692 | 1449.18  |
| 2684  | SFXN2     | 3378.647 | -0.62908 | 0.09176  | -6.85576 | 7.09E-12 | 7.03E-11 | 4208.759 | 4106.683 | 4002.543 | 2573.642 | 2573.35  | 2806.908 |
| 3718  | NIF3L1    | 1283.98  | -0.62911 | 0.111902 | -5.62197 | 1.89E-08 | 1.35E-07 | 1518.384 | 1655.921 | 1507.65  | 935.2612 | 1037.469 | 1049.199 |
| 19271 | AK7       | 25.80269 | -0.62921 | 0.551398 | -1.14112 | 0.253819 | 0.350135 | 25.47806 | 33.93953 | 33.39511 | 17.85702 | 32.08666 | 12.05975 |
| 4376  | PIP4K2A   | 2179.011 | -0.62939 | 0.123515 | -5.09563 | 3.48E-07 | 2.11E-06 | 2402.527 | 3090.687 | 2446.887 | 1676.327 | 1756.21  | 1701.43  |
| 4400  | TAOK1     | 9782.071 | -0.6296  | 0.123894 | -5.08178 | 3.74E-07 | 2.26E-06 | 10656.88 | 14230.52 | 10765.75 | 7437.447 | 7482.609 | 8119.229 |
| 16317 | RAWD227A  | 51.48537 | -0.62967 | 0.392985 | -1.60229 | 0.109092 | 0.177742 | 60.17159 | 55.83601 | 73.05179 | 24.5534  | 47.06043 | 48.23901 |
| 3285  | SPIN1     | 3984.896 | -0.62968 | 0.104009 | -6.05413 | 1.41E-09 | 1.14E-08 | 4726.451 | 5368.468 | 4430.417 | 3051.318 | 3101.71  | 3231.009 |
| 15256 | LOC119615 | 54.6346  | -0.62983 | 0.352422 | -1.78715 | 0.073913 | 0.128801 | 69.38706 | 69.5213  | 60.52863 | 44.64254 | 38.50399 | 45.22408 |
| 6889  | TSEN54    | 1111.795 | -0.62994 | 0.166625 | -3.78059 | 0.000156 | 0.000604 | 1569.882 | 1037.345 | 1449.904 | 794.6372 | 832.114  | 986.8898 |
| 11924 | LOC119625 | 115.8772 | -0.63011 | 0.260407 | -2.41973 | 0.015532 | 0.03463  | 119.259  | 154.     |          |          |          |          |



|       |           |          |          |          |          |          |          |          |          |          |          |          |          |
|-------|-----------|----------|----------|----------|----------|----------|----------|----------|----------|----------|----------|----------|----------|
| 12290 | LOC119615 | 127.9351 | -0.63106 | 0.268971 | -2.34622 | 0.018965 | 0.041024 | 187.0198 | 142.3271 | 138.4505 | 75.89232 | 113.3729 | 110.5477 |
| 24036 | MYL5      | 2.668752 | -0.63136 | 1.573286 | -0.4013  | 0.688198 | 0.761198 | 2.710432 | 4.926706 | 2.087194 | 0        | 4.278221 | 2.009959 |
| 23290 | C8B       | 4.481869 | -0.63136 | 1.225304 | -0.51527 | 0.606363 | 0.692141 | 7.047123 | 2.737059 | 6.261582 | 6.696381 | 2.139111 | 2.009959 |
| 9803  | LOC103230 | 204.3854 | -0.63152 | 0.217438 | -2.90435 | 0.00368  | 0.00998  | 250.986  | 247.4301 | 246.2889 | 200.8914 | 121.9293 | 158.7868 |
| 2892  | SRSF2     | 8831.639 | -0.63155 | 0.096283 | -6.55926 | 5.41E-11 | 4.97E-10 | 11139.33 | 9942.093 | 11130.31 | 6589.239 | 6733.92  | 7454.938 |
| 7264  | HEXD      | 573.0503 | -0.63158 | 0.173159 | -3.6474  | 0.000265 | 0.00097  | 806.0824 | 556.7178 | 730.5179 | 424.1041 | 421.4048 | 499.4748 |
| 3441  | LOC103231 | 1177.309 | -0.63165 | 0.106898 | -5.9089  | 3.44E-09 | 2.66E-08 | 1434.361 | 1455.568 | 1403.986 | 953.1182 | 879.1745 | 937.6458 |
| 3272  | PAIP1     | 5032.45  | -0.63182 | 0.104108 | -6.06883 | 1.29E-09 | 1.05E-08 | 5707.085 | 6886.988 | 5756.481 | 3982.115 | 3929.546 | 3932.485 |
| 24327 | GFI1B     | 2.695878 | -0.63204 | 1.765988 | -0.3579  | 0.720421 | 0.78729  | 2.168345 | 3.831883 | 3.478657 | 6.696381 | 0        | 0        |
| 5154  | DDX27     | 3765.661 | -0.63208 | 0.137395 | -4.60044 | 4.22E-06 | 2.17E-05 | 4103.594 | 5634.51  | 3996.977 | 2830.337 | 2924.164 | 3104.382 |
| 2416  | AHCY      | 4434.975 | -0.63228 | 0.087221 | -7.24912 | 4.19E-13 | 4.62E-12 | 5228.965 | 5582.506 | 5367.568 | 3370.512 | 3467.498 | 3592.802 |
| 21319 | YIPF7     | 11.17735 | -0.63246 | 0.7617   | -0.83033 | 0.406352 | 0.506725 | 14.09425 | 15.87494 | 10.43597 | 8.928508 | 10.69555 | 7.034856 |
| 3101  | SOC57     | 2117.035 | -0.63256 | 0.10078  | -6.2766  | 3.46E-10 | 2.97E-09 | 2617.193 | 2614.439 | 2496.98  | 1602.667 | 1585.081 | 1785.849 |
| 15582 | RAPGEF1   | 59.98863 | -0.6326  | 0.365216 | -1.73213 | 0.08325  | 0.142036 | 72.63957 | 65.68942 | 78.61764 | 44.64254 | 64.17332 | 34.1693  |
| 23194 | LOC119621 | 4.615004 | -0.63264 | 1.192687 | -0.53043 | 0.595812 | 0.682921 | 7.047123 | 3.284471 | 6.957314 | 2.232127 | 2.139111 | 6.029877 |
| 3971  | ADSL      | 1929.238 | -0.63268 | 0.11719  | -5.39874 | 6.71E-08 | 4.49E-07 | 2556.479 | 2102.609 | 2383.576 | 1468.74  | 1428.926 | 1635.102 |
| 15468 | SEC61G    | 1992.168 | -0.6328  | 0.361582 | -1.7501  | 0.080101 | 0.13767  | 3124.044 | 1355.392 | 2787.796 | 1439.722 | 1580.803 | 1665.251 |
| 24708 | TRNAE-UU  | 1.365617 | -0.63282 | 2.127901 | -0.29739 | 0.766169 | 0.824373 | 1.626259 | 0.547412 | 2.782925 | 2.232127 | 0        | 1.004979 |
| 5133  | DDIAS     | 847.2485 | -0.63287 | 0.13731  | -4.60908 | 4.04E-06 | 2.09E-05 | 963.8296 | 1175.841 | 947.5861 | 669.6381 | 699.4892 | 627.1072 |
| 7232  | ZNF841    | 420.0114 | -0.6329  | 0.173042 | -3.65747 | 0.000255 | 0.000936 | 501.4299 | 591.7522 | 439.7022 | 292.4086 | 355.0924 | 339.6831 |
| 2281  | CLIP4     | 8383.623 | -0.63295 | 0.084973 | -7.44888 | 9.41E-14 | 1.10E-12 | 10558.22 | 10161.61 | 9867.558 | 6386.115 | 6445.14  | 6883.104 |
| 4332  | MAD2L2    | 2180.682 | -0.63364 | 0.123514 | -5.13014 | 2.90E-07 | 1.78E-06 | 2897.452 | 2289.276 | 2775.272 | 1636.149 | 1625.724 | 1860.217 |
| 5977  | LOC103215 | 478.7249 | -0.6337  | 0.151829 | -4.17374 | 3.00E-05 | 0.000133 | 575.6957 | 593.9418 | 583.0229 | 350.4439 | 340.1186 | 429.1265 |
| 4687  | ANP32A    | 5055.619 | -0.63375 | 0.129541 | -4.8923  | 9.97E-07 | 5.65E-06 | 5596.5   | 7425.094 | 5426.705 | 3783.455 | 3925.268 | 4176.695 |
| 23886 | TRNAR-AC  | 2.717507 | -0.63404 | 1.493683 | -0.42448 | 0.671217 | 0.747061 | 2.168345 | 2.189647 | 5.565851 | 2.232127 | 2.139111 | 2.009959 |
| 3392  | SUV39H2   | 1611.468 | -0.63455 | 0.106628 | -5.95109 | 2.66E-09 | 2.09E-08 | 1940.669 | 2103.156 | 1834.644 | 1258.92  | 1296.301 | 1235.12  |
| 4960  | ZC3HC1    | 1581.853 | -0.63484 | 0.13482  | -4.70882 | 2.49E-06 | 1.34E-05 | 2137.989 | 1682.744 | 1958.484 | 1245.527 | 1084.529 | 1381.847 |
| 22374 | LOC103211 | 7.645488 | -0.63489 | 0.958392 | -0.66245 | 0.507682 | 0.603232 | 7.047123 | 5.474118 | 15.30609 | 4.464254 | 8.556443 | 5.024897 |
| 19683 | LOC103245 | 19.24452 | -0.63535 | 0.592506 | -1.07232 | 0.283578 | 0.383017 | 25.47806 | 19.70683 | 24.3506  | 15.62489 | 19.252   | 11.05477 |
| 5203  | GPN2      | 827.8456 | -0.63537 | 0.138812 | -4.5772  | 4.71E-06 | 2.41E-05 | 1090.136 | 906.514  | 1028.987 | 674.1023 | 566.8643 | 700.4707 |
| 22209 | DIRAS3    | 7.986946 | -0.63557 | 0.919959 | -0.69086 | 0.489651 | 0.586131 | 11.38381 | 10.40082 | 6.957314 | 4.464254 | 10.69555 | 4.019918 |
| 2652  | SMARCD2   | 3760.424 | -0.63595 | 0.092282 | -6.89137 | 5.53E-12 | 5.54E-11 | 4567.078 | 4658.475 | 4509.035 | 2955.336 | 2755.175 | 3117.446 |
| 21316 | LOC119624 | 10.93176 | -0.63595 | 0.7657   | -0.83055 | 0.40623  | 0.50664  | 14.63633 | 10.94824 | 14.61036 | 8.928508 | 6.417332 | 10.04979 |
| 4922  | E2F8      | 1394.601 | -0.63599 | 0.134382 | -4.73271 | 2.22E-06 | 1.20E-05 | 1572.05  | 2009.549 | 1509.737 | 1089.278 | 1084.529 | 1102.462 |
| 4121  | YBX3      | 6277.787 | -0.63602 | 0.120545 | -5.27621 | 1.32E-07 | 8.51E-07 | 6990.204 | 8946.351 | 6987.23  | 4723.181 | 4712.461 | 5307.297 |
| 7238  | LOC103221 | 450.907  | -0.63608 | 0.173988 | -3.65588 | 0.000256 | 0.000941 | 575.1536 | 455.4466 | 612.2436 | 395.0865 | 352.9533 | 314.5586 |
| 6747  | MRNIP     | 431.2636 | -0.63614 | 0.165726 | -3.8385  | 0.000124 | 0.000488 | 585.4533 | 483.912  | 509.9711 | 301.3371 | 323.0057 | 383.9022 |
| 9427  | LOC103231 | 232.7103 | -0.63652 | 0.212088 | -3.00122 | 0.002689 | 0.007582 | 300.8579 | 228.2707 | 322.8194 | 176.338  | 168.9897 | 198.9859 |
| 8950  | TMEM267   | 268.9559 | -0.63683 | 0.203325 | -3.13207 | 0.001736 | 0.005156 | 338.804  | 273.7059 | 366.6504 | 209.8199 | 243.8586 | 180.8963 |
| 4933  | TEX30     | 1914.576 | -0.63741 | 0.13491  | -4.72475 | 2.30E-06 | 1.24E-05 | 2343.981 | 2013.381 | 2628.473 | 1595.971 | 1602.194 | 1303.458 |
| 7315  | CUNH2orf3 | 300.8924 | -0.63769 | 0.175713 | -3.62915 | 0.000284 | 0.001033 | 351.272  | 375.5245 | 368.0419 | 245.534  | 260.9715 | 204.0108 |
| 3140  | GAPVD1    | 6413.921 | -0.63786 | 0.10238  | -6.23036 | 4.65E-10 | 3.94E-09 | 7627.155 | 8598.197 | 7207.777 | 4877.197 | 4823.695 | 5349.506 |
| 7557  | RILPL1    | 1470.692 | -0.6381  | 0.180278 | -3.53954 | 0.000401 | 0.00141  | 1392.62  | 2405.875 | 1573.744 | 1194.188 | 1090.946 | 1166.781 |
| 13954 | LOC103230 | 103.1019 | -0.63811 | 0.315707 | -2.02121 | 0.043258 | 0.082416 | 102.9964 | 145.0641 | 125.2316 | 91.51721 | 100.5382 | 53.26391 |
| 2510  | ATG5      | 3693.329 | -0.6383  | 0.089683 | -7.11729 | 1.10E-12 | 1.17E-11 | 4608.276 | 4415.424 | 4474.248 | 2765.605 | 2866.408 | 3030.013 |
| 4962  | ANKRD26   | 3912.546 | -0.63833 | 0.13562  | -4.70677 | 2.52E-06 | 1.35E-05 | 4216.89  | 5868.255 | 4206.392 | 3073.639 | 3093.154 | 3016.948 |
| 22175 | LOC119621 | 7.802538 | -0.63837 | 0.917844 | -0.69551 | 0.486734 | 0.583553 | 12.46799 | 8.211177 | 8.348776 | 4.464254 | 4.278221 | 9.044815 |
| 8438  | FOXF2     | 317.6245 | -0.63838 | 0.195107 | -3.27193 | 0.001068 | 0.003365 | 349.1036 | 425.339  | 386.1309 | 194.195  | 303.7537 | 247.2249 |
| 20558 | GALR1     | 13.96068 | -0.63868 | 0.676941 | -0.94348 | 0.345437 | 0.447515 | 15.7205  | 17.51718 | 17.39328 | 13.39276 | 10.69555 | 9.044815 |
| 13237 | GXYLT2    | 83.79033 | -0.63869 | 0.295714 | -2.15984 | 0.030785 | 0.061828 | 101.3702 | 114.4091 | 90.44508 | 71.42806 | 57.75599 | 67.33362 |
| 2256  | BZW1      | 19820.34 | -0.63873 | 0.085165 | -7.49992 | 6.39E-14 | 7.53E-13 | 24648.67 | 22643.14 | 25116.6  | 15792.3  | 15765.25 | 14956.1  |
| 4029  | NAT10     | 2051.054 | -0.63874 | 0.119378 | -5.35055 | 8.77E-08 | 5.79E-07 | 2370.002 | 2859.679 | 2265.997 | 1564.721 | 1578.664 | 1667.261 |
| 23365 | LOC119621 | 4.645379 | -0.63903 | 1.267196 | -0.50429 | 0.61406  | 0.698686 | 6.505036 | 4.926706 | 6.261582 | 0        | 2.139111 | 8.039836 |
| 16924 | LOC103221 | 43.07108 | -0.63944 | 0.425505 | -1.50278 | 0.132895 | 0.208758 | 43.909   | 53.64636 | 58.44144 | 31.24978 | 47.06043 | 24.11951 |
| 22105 | GABRD     | 9.302378 | -0.63986 | 0.903611 | -0.70812 | 0.478874 | 0.575927 | 11.38381 | 8.758589 | 13.2189  | 4.464254 | 14.97377 | 3.014938 |
| 4779  | LOC119618 | 558.9925 | -0.63987 | 0.13261  | -4.82522 | 1.40E-06 | 7.78E-06 | 685.1972 | 699.5923 | 656.7704 | 457.586  | 425.683  | 429.1262 |
| 2531  | MLX       | 4013.663 | -0.64009 | 0.090376 | -7.0825  | 1.42E-12 | 1.49E-11 | 4931.902 | 4807.918 | 4934.823 | 3180.781 | 2941.277 | 3285.278 |
| 5846  | AVEN      | 433.8987 | -0.64009 | 0.150604 | -4.25018 | 2.14E-05 | 9.71E-05 | 567.0223 | 489.9336 | 529.4516 | 319.1942 | 355.0924 | 342.698  |
| 18370 | LOC119621 | 26.21798 | -0.64027 | 0.504609 | -1.26883 | 0.2045   | 0.295952 | 28.18849 | 38.31883 | 29.22072 | 20.08914 | 21.39111 | 20.09959 |
| 19514 | LOC119620 | 22.55649 | -0.64037 | 0.582812 | -1.09877 | 0.27187  | 0.370365 | 30.35684 | 19.15941 | 32.00364 | 26.78552 | 14.97377 | 12.05975 |
| 5378  | TAF8      | 626.1143 | -0.64039 | 0.143055 | -4.47655 | 7.59E-06 | 3.75E-05 | 709.5911 | 807.4324 | 771.5661 | 430.8005 | 551.8906 | 485.4051 |
| 24831 | RGS1      | 1.341582 | -0.64103 | 2.320843 | -0.27621 | 0.78239  | 0.837623 | 2.168345 | 2.737059 | 0        | 0        | 2.139111 | 1.004979 |
| 3152  | MTMR4     | 4629.251 | -0.64109 | 0.103096 | -6.21838 | 5.02E-10 | 4.24E-09 | 5839.354 | 5560.609 | 5534.543 | 3415.154 | 3379.795 | 4046.047 |
| 3852  | TAF1      | 3409.042 | -0.64141 | 0.116688 | -5.49684 | 3.87E-08 | 2.67E-07 | 3892.18  | 4802.444 | 3771.56  | 2616.053 | 2603.298 | 2768.718 |
| 4055  | NOP2      | 3036.105 | -0.64155 | 0.120413 | -5.32796 | 9.93E-08 | 6.51E-07 | 3610.295 | 4172.92  | 3323.509 | 2334.805 | 2171.197 | 2603.902 |
| 17646 | LOC119621 | 36.38481 | -0.64162 | 0.459121 | -1.39749 | 0.162266 | 0.244466 | 45.53526 | 31.20247 | 57.04997 | 24.5534  | 27.80844 | 32.15934 |
| 3112  | CUL1      | 10234.47 | -0.64194 | 0.102441 | -6.26643 | 3.69E-10 | 3.16E-09 | 12070.64 | 13858.28 | 11500.44 | 7743.248 | 7720.05  | 8514.186 |
| 4797  | NCOA7     | 1354.278 | -0.64195 | 0.133319 | -4.81511 | 1.47E-06 | 8.15E-06 | 1556.33  | 1925.795 | 1470.776 | 1095.974 | 990.4082 | 1086.383 |
| 3839  | LYRM9     | 1033.57  | -0.64212 | 0.116604 | -5.50681 | 3.65E-08 | 2.53E-07 | 1249.509 | 1240.435 | 1284.32  | 881.6902 | 795.7492 | 749.7147 |
| 3808  | BTBD1     | 4837.874 | -0.64222 | 0.116101 | -5.53156 | 3.17E-08 | 2.22E-07 | 5399.18  | 6882.061 | 5411.399 | 3772.295 | 3709.218 | 3853.091 |
| 2129  | RPL32     | 17857.57 | -0.64224 | 0.083005 | -7.7373  | 1.02E-14 | 1.27E-13 | 21087.16 | 21095.61 | 23121.94 | 13807.9  |          |          |



|       |           |          |          |          |          |          |          |          |          |          |          |          |          |
|-------|-----------|----------|----------|----------|----------|----------|----------|----------|----------|----------|----------|----------|----------|
| 3557  | PFDN2     | 1249.149 | -0.6424  | 0.110759 | -5.79997 | 6.63E-09 | 4.96E-08 | 1528.141 | 1606.654 | 1433.902 | 1008.921 | 928.374  | 988.8998 |
| 4476  | WDR5B     | 627.0635 | -0.64278 | 0.12791  | -5.02529 | 5.03E-07 | 2.99E-06 | 784.9411 | 771.3032 | 738.8667 | 493.3001 | 468.4652 | 505.5047 |
| 2778  | GFM2      | 2574.483 | -0.64299 | 0.095492 | -6.73342 | 1.66E-11 | 1.59E-10 | 3127.296 | 3301.988 | 2984.688 | 1995.522 | 2070.659 | 1966.745 |
| 5430  | ANP32B    | 8486.997 | -0.64305 | 0.144627 | -4.44626 | 8.74E-06 | 4.28E-05 | 8827.877 | 13200.84 | 9014.591 | 6502.186 | 6678.304 | 6698.188 |
| 4697  | NT5DC3    | 958.8555 | -0.64328 | 0.13167  | -4.88559 | 1.03E-06 | 5.84E-06 | 1135.129 | 1321.452 | 1050.554 | 716.5128 | 780.7754 | 748.7097 |
| 4602  | RBM8A     | 2514.247 | -0.64329 | 0.130167 | -4.94208 | 7.73E-07 | 4.47E-06 | 2791.203 | 3645.215 | 2762.054 | 1832.576 | 2036.433 | 2017.999 |
| 4049  | STAT4     | 2965.283 | -0.64371 | 0.120643 | -5.33562 | 9.52E-08 | 6.25E-07 | 3362.02  | 4227.661 | 3257.414 | 2366.055 | 2278.153 | 2300.398 |
| 2587  | U2AF2     | 6925.763 | -0.64382 | 0.091956 | -7.00143 | 2.53E-12 | 2.60E-11 | 8480.941 | 8516.633 | 8346.689 | 5544.603 | 4941.346 | 5724.363 |
| 3449  | CKAP5     | 13777.79 | -0.64418 | 0.109176 | -5.90041 | 3.63E-09 | 2.79E-08 | 15656.54 | 19136.97 | 15622.65 | 10642.78 | 10115.85 | 11491.94 |
| 14986 | SLC43A1   | 55.28205 | -0.64418 | 0.35077  | -1.83649 | 0.066286 | 0.117589 | 60.17159 | 71.71095 | 70.26887 | 42.41041 | 44.92132 | 42.20914 |
| 23251 | LOC103231 | 4.657889 | -0.64432 | 1.234071 | -0.52211 | 0.601593 | 0.687856 | 5.420864 | 4.379295 | 7.653045 | 4.464254 | 0        | 6.029877 |
| 13939 | LOC103241 | 85.61759 | -0.64464 | 0.318318 | -2.02513 | 0.042854 | 0.081732 | 120.8853 | 75.54283 | 116.1871 | 69.19594 | 70.59065 | 61.30375 |
| 3014  | TYW5      | 1559.744 | -0.64467 | 0.100782 | -6.39669 | 1.59E-10 | 1.40E-09 | 1901.097 | 1977.251 | 1829.774 | 1196.42  | 1227.85  | 1226.075 |
| 14998 | SCG3      | 65.88085 | -0.64477 | 0.351379 | -1.83496 | 0.066511 | 0.117895 | 70.47123 | 96.34448 | 75.83472 | 35.71403 | 55.61688 | 61.30375 |
| 25171 | LOC119621 | 0.874975 | -0.64485 | 2.948276 | -0.21872 | 0.826866 | 0.873351 | 1.626259 | 0        | 1.391463 | 2.232127 | 0        | 0        |
| 3044  | MAP3K20   | 12412.04 | -0.64489 | 0.101589 | -6.348   | 2.18E-10 | 1.91E-09 | 14294.28 | 17032.17 | 14099    | 9584.753 | 9431.339 | 10030.7  |
| 3060  | CUL7      | 4178.423 | -0.64495 | 0.102022 | -6.32166 | 2.59E-10 | 2.25E-09 | 5346.056 | 4824.34  | 5129.627 | 3207.566 | 3003.311 | 3559.637 |
| 4807  | LOC103211 | 1977.906 | -0.64497 | 0.134108 | -4.80932 | 1.51E-06 | 8.38E-06 | 2264.295 | 2829.572 | 2149.81  | 1417.401 | 1505.934 | 1700.425 |
| 2242  | TMEM33    | 3937.484 | -0.6453  | 0.08572  | -7.52796 | 5.15E-14 | 6.11E-13 | 4892.329 | 4843.5   | 4675.315 | 3129.442 | 2999.033 | 3085.287 |
| 2769  | SNRPA     | 2792.328 | -0.6454  | 0.095687 | -6.74497 | 1.53E-11 | 1.47E-10 | 3271.491 | 3629.34  | 3318.639 | 2236.591 | 2124.137 | 2173.771 |
| 3800  | MED13     | 10634.05 | -0.64554 | 0.116512 | -5.54058 | 3.01E-08 | 2.11E-07 | 12085.27 | 15156.19 | 11685.5  | 7995.479 | 8060.169 | 8821.71  |
| 19384 | PRR22     | 20.74071 | -0.64565 | 0.576556 | -1.11984 | 0.26278  | 0.360401 | 27.6464  | 19.70683 | 27.82925 | 20.08914 | 17.11289 | 12.05975 |
| 8292  | PRKN      | 212.4115 | -0.64591 | 0.194835 | -3.31516 | 0.000916 | 0.002937 | 247.7335 | 269.874  | 257.4206 | 178.5702 | 171.1289 | 149.7419 |
| 3519  | SHMT2     | 5546.273 | -0.64607 | 0.110635 | -5.83963 | 5.23E-09 | 3.95E-08 | 7350.691 | 6337.934 | 6624.058 | 4194.167 | 3933.825 | 4836.966 |
| 18882 | LOC103211 | 22.73653 | -0.64614 | 0.535552 | -1.20649 | 0.227629 | 0.320475 | 25.47806 | 30.65506 | 27.13352 | 20.08914 | 14.97377 | 18.08963 |
| 17642 | LOC103221 | 35.96784 | -0.64641 | 0.461995 | -1.39917 | 0.161761 | 0.24376  | 39.5723  | 51.45671 | 40.35242 | 40.17829 | 17.11289 | 27.13445 |
| 3020  | KIFC1     | 2292.249 | -0.64647 | 0.101197 | -6.38822 | 1.68E-10 | 1.48E-09 | 2764.098 | 2868.985 | 2766.228 | 1642.845 | 1796.853 | 1914.486 |
| 1891  | LOC103221 | 13201.29 | -0.64654 | 0.078687 | -8.21663 | 2.09E-16 | 2.94E-15 | 16402.45 | 16376.92 | 15554.47 | 10196.36 | 10272.01 | 10405.56 |
| 16075 | SYCE1L    | 50.06918 | -0.64657 | 0.391287 | -1.65242 | 0.098449 | 0.162817 | 61.79785 | 59.12048 | 61.92009 | 26.78552 | 55.61688 | 35.17428 |
| 4702  | HNRNPUL1  | 7649.556 | -0.64699 | 0.132473 | -4.88394 | 1.04E-06 | 5.88E-06 | 8216.945 | 11452.95 | 8342.515 | 5761.12  | 5854.746 | 6269.062 |
| 3469  | PLOD2     | 4804.488 | -0.647   | 0.109871 | -5.88875 | 3.89E-09 | 2.98E-08 | 5657.213 | 6607.261 | 5329.302 | 3877.205 | 3503.863 | 3852.086 |
| 15116 | LOC103221 | 61.31825 | -0.64706 | 0.357392 | -1.81051 | 0.070216 | 0.123492 | 69.92914 | 85.94365 | 67.48594 | 40.17829 | 64.17332 | 40.19918 |
| 22291 | LOC103231 | 6.877794 | -0.64717 | 0.957682 | -0.67577 | 0.499188 | 0.595348 | 8.131296 | 10.40082 | 6.957314 | 4.464254 | 4.278221 | 7.034856 |
| 3821  | LOC103211 | 1212.004 | -0.64727 | 0.117202 | -5.5227  | 3.34E-08 | 2.32E-07 | 1594.276 | 1362.508 | 1482.604 | 982.1359 | 887.7309 | 962.7703 |
| 5116  | GNPNAT1   | 2320.848 | -0.6473  | 0.14009  | -4.6206  | 3.83E-06 | 1.99E-05 | 2503.897 | 3448.694 | 2542.202 | 1935.254 | 1809.688 | 1685.351 |
| 5042  | TRMT13    | 873.7815 | -0.64745 | 0.138773 | -4.66555 | 3.08E-06 | 1.62E-05 | 1027.796 | 1157.776 | 1008.81  | 656.2453 | 785.0536 | 607.0076 |
| 10087 | SHF       | 198.1418 | -0.64755 | 0.227953 | -2.84071 | 0.004501 | 0.011864 | 266.1644 | 186.12   | 274.1182 | 151.7846 | 151.8769 | 158.7868 |
| 4808  | CCP110    | 1611.451 | -0.64762 | 0.134684 | -4.80843 | 1.52E-06 | 8.41E-06 | 1813.821 | 2345.112 | 1740.72  | 1270.08  | 1274.91  | 1224.065 |
| 5417  | TLNRD1    | 584.0843 | -0.64773 | 0.145494 | -4.45195 | 8.51E-06 | 4.18E-05 | 642.3723 | 795.9368 | 703.3844 | 437.4969 | 444.935  | 480.3802 |
| 19236 | LOC103241 | 26.53081 | -0.64783 | 0.564667 | -1.14728 | 0.251267 | 0.347262 | 28.73058 | 31.20247 | 36.87376 | 8.928508 | 36.36488 | 17.08465 |
| 6629  | ZNF830    | 870.697  | -0.64787 | 0.166619 | -3.88834 | 0.000101 | 0.000405 | 944.3145 | 1332.4   | 909.3209 | 736.6019 | 667.4025 | 634.142  |
| 21237 | LOC119621 | 11.64075 | -0.64791 | 0.767143 | -0.84458 | 0.398348 | 0.498662 | 13.55216 | 12.59047 | 16.00182 | 6.696381 | 14.97377 | 6.029877 |
| 7570  | LOC103211 | 329.2487 | -0.64792 | 0.183284 | -3.53505 | 0.000408 | 0.001432 | 443.9687 | 337.2057 | 427.1791 | 254.4625 | 235.3022 | 277.3743 |
| 3025  | NSMCE1    | 2348.254 | -0.64808 | 0.101641 | -6.37614 | 1.82E-10 | 1.60E-09 | 3035.684 | 2641.262 | 2926.942 | 1794.63  | 1809.688 | 1881.322 |
| 2433  | UHMK1     | 16889.3  | -0.64808 | 0.089719 | -7.22344 | 5.07E-13 | 5.54E-12 | 20626.39 | 21627.69 | 19614.75 | 12560.18 | 12841.08 | 14065.69 |
| 4158  | PHF14     | 4449.931 | -0.64811 | 0.123425 | -5.2511  | 1.51E-07 | 9.67E-07 | 5052.787 | 6459.459 | 4785.936 | 3426.315 | 3520.976 | 3454.114 |
| 4238  | LOC103241 | 1711.045 | -0.64818 | 0.12477  | -5.19502 | 2.05E-07 | 1.28E-06 | 1964.521 | 2420.655 | 1881.953 | 1354.901 | 1300.579 | 1343.658 |
| 5018  | OPN3      | 499.6034 | -0.64836 | 0.138593 | -4.67816 | 2.89E-06 | 1.53E-05 | 597.9213 | 603.7952 | 628.2454 | 412.9435 | 365.7879 | 388.9271 |
| 2675  | KARS1     | 8845.599 | -0.64883 | 0.094507 | -6.86542 | 6.63E-12 | 6.59E-11 | 11081.33 | 10790.58 | 10543.81 | 6694.149 | 6417.332 | 7546.391 |
| 20023 | LOC103221 | 16.41036 | -0.64887 | 0.63365  | -1.02402 | 0.305826 | 0.406052 | 18.97302 | 24.63353 | 16.69755 | 13.39276 | 10.69555 | 14.06971 |
| 22244 | LAMP3     | 8.959242 | -0.6489  | 0.947153 | -0.6851  | 0.493279 | 0.589556 | 5.420864 | 14.78012 | 11.82743 | 11.16063 | 8.556443 | 2.009959 |
| 3905  | MON1B     | 1005.953 | -0.64914 | 0.119303 | -5.44111 | 5.29E-08 | 3.60E-07 | 1254.93  | 1165.987 | 1270.405 | 765.6196 | 731.5758 | 847.1977 |
| 3279  | PWWP3A    | 2124.592 | -0.64915 | 0.107166 | -6.05747 | 1.38E-09 | 1.12E-08 | 2764.64  | 2436.53  | 2589.512 | 1551.328 | 1625.724 | 1779.819 |
| 15096 | BRME1     | 58.90185 | -0.64917 | 0.357303 | -1.81686 | 0.069238 | 0.121935 | 71.5554  | 59.66789 | 84.1835  | 40.17829 | 55.61688 | 42.20914 |
| 5457  | MINDY4    | 596.2078 | -0.64918 | 0.146315 | -4.43689 | 9.13E-06 | 4.45E-05 | 698.7493 | 787.1782 | 704.0801 | 448.6575 | 414.9875 | 523.5943 |
| 19253 | LOC103231 | 21.38655 | -0.64928 | 0.567299 | -1.14451 | 0.252414 | 0.348539 | 29.27266 | 18.612   | 30.61218 | 15.62489 | 17.11289 | 17.08465 |
| 3098  | GTF2H3    | 1772.879 | -0.64934 | 0.103375 | -6.28135 | 3.36E-10 | 2.88E-09 | 2106.548 | 2280.518 | 2103.196 | 1426.329 | 1418.23  | 1302.453 |
| 16498 | TIFA      | 41.25326 | -0.64939 | 0.412148 | -1.57562 | 0.115114 | 0.185496 | 50.95612 | 44.34036 | 54.96278 | 40.17829 | 29.94755 | 27.13445 |
| 22822 | LOC119621 | 5.488761 | -0.64955 | 1.101868 | -0.5895  | 0.555527 | 0.647123 | 6.505036 | 3.831883 | 9.740239 | 6.696381 | 2.139111 | 4.019918 |
| 2569  | EIF2D     | 4042.96  | -0.64957 | 0.092477 | -7.02411 | 2.15E-12 | 2.23E-11 | 5038.693 | 4859.375 | 4922.995 | 3153.995 | 2939.138 | 3343.567 |
| 3100  | LOC103241 | 2232.092 | -0.64965 | 0.103469 | -6.27867 | 3.41E-10 | 2.93E-09 | 2772.772 | 2810.96  | 2602.731 | 1662.935 | 1657.811 | 1885.341 |
| 3383  | PRTG      | 2063.008 | -0.64984 | 0.10909  | -5.95688 | 2.57E-09 | 2.02E-08 | 2427.463 | 2784.136 | 2350.876 | 1580.346 | 1567.968 | 1667.261 |
| 16888 | LOC119621 | 37.93058 | -0.64989 | 0.43081  | -1.50854 | 0.131417 | 0.206876 | 49.87195 | 48.17224 | 40.35242 | 24.5534  | 38.50399 | 26.12947 |
| 4220  | NXT1      | 647.5619 | -0.64999 | 0.124903 | -5.20395 | 1.95E-07 | 1.23E-06 | 813.1296 | 780.6092 | 779.2191 | 495.5322 | 513.3866 | 503.4947 |
| 6339  | PAQR8     | 399.2315 | -0.65009 | 0.16213  | -4.00966 | 6.08E-05 | 0.000255 | 485.1673 | 520.0412 | 462.6614 | 292.4086 | 282.3626 | 352.7478 |
| 3181  | EBNA1BP2  | 4080.348 | -0.65026 | 0.105159 | -6.18361 | 6.27E-10 | 5.24E-09 | 4691.215 | 5508.605 | 4750.454 | 3399.529 | 3061.067 | 3071.217 |
| 3053  | DUT       | 1779.022 | -0.6503  | 0.102649 | -6.33512 | 2.37E-10 | 2.07E-09 | 2288.689 | 2075.786 | 2158.854 | 1392.847 | 1319.831 | 1438.126 |
| 3307  | LOC103211 | 1924.053 | -0.65036 | 0.107793 | -6.0334  | 1.61E-09 | 1.29E-08 | 2267.005 | 2557.508 | 2231.211 | 1475.436 | 1435.343 | 1577.818 |
| 4846  | CFAP97    | 3298.803 | -0.65041 | 0.135977 | -4.78325 | 1.72E-06 | 9.46E-06 | 3563.676 | 4932.18  | 3591.365 | 2633.91  | 2622.55  | 2449.135 |
| 3366  | LSM14A    | 4944.696 | -0.65044 | 0.108922 | -5.97159 | 2.35E-09 | 1.86E-08 | 5769.967 | 6820.751 | 5535.935 | 3778.991 | 3696.383 | 4066.147 |
| 2657  | LOC119621 | 2496.759 | -0.65061 | 0.094505 | -6.88446 | 5.80E-12 | 5.80     |          |          |          |          |          |          |



|       |           |          |          |          |          |          |          |          |          |          |          |          |          |
|-------|-----------|----------|----------|----------|----------|----------|----------|----------|----------|----------|----------|----------|----------|
| 4426  | CUNH17or  | 1451.162 | -0.65102 | 0.128681 | -5.05922 | 4.21E-07 | 2.53E-06 | 1661.495 | 2062.1   | 1593.921 | 1136.153 | 1150.842 | 1102.462 |
| 6219  | EIF3A     | 23499.02 | -0.65126 | 0.160142 | -4.06675 | 4.77E-05 | 0.000204 | 24128.26 | 38230.15 | 23787.75 | 17553.45 | 17788.84 | 19505.65 |
| 2315  | WSB1      | 11029.81 | -0.65132 | 0.088131 | -7.39038 | 1.46E-13 | 1.68E-12 | 14493.76 | 12874.03 | 13068.62 | 8390.565 | 8620.616 | 8731.262 |
| 3881  | ORC6      | 1317.63  | -0.65139 | 0.119185 | -5.46542 | 4.62E-08 | 3.16E-07 | 1689.683 | 1431.482 | 1709.412 | 986.6001 | 1069.555 | 1019.049 |
| 25164 | GPRC6A    | 0.862135 | -0.65153 | 2.961229 | -0.22002 | 0.825855 | 0.872456 | 0        | 1.642235 | 1.391463 | 0        | 2.139111 | 0        |
| 25165 | LOC119620 | 0.862135 | -0.65153 | 2.961229 | -0.22002 | 0.825855 | 0.872456 | 0        | 1.642235 | 1.391463 | 0        | 2.139111 | 0        |
| 5095  | TCEANC2   | 516.9987 | -0.65172 | 0.140712 | -4.63155 | 3.63E-06 | 1.89E-05 | 621.231  | 662.9157 | 610.1564 | 377.2295 | 438.5177 | 391.942  |
| 4650  | LOC103220 | 1854.351 | -0.65184 | 0.13257  | -4.91695 | 8.79E-07 | 5.03E-06 | 2381.928 | 1948.786 | 2471.238 | 1549.096 | 1253.519 | 1521.539 |
| 4210  | TPX2      | 6502.489 | -0.65213 | 0.125184 | -5.20939 | 1.89E-07 | 1.20E-06 | 7155.54  | 9521.134 | 7168.816 | 5008.893 | 4847.225 | 5313.326 |
| 18046 | FES       | 34.34354 | -0.65233 | 0.488584 | -1.33515 | 0.181826 | 0.267863 | 38.48813 | 33.39212 | 53.57132 | 17.85702 | 40.6431  | 22.10955 |
| 17431 | LOC103215 | 31.2424  | -0.65269 | 0.45884  | -1.42248 | 0.154886 | 0.236225 | 37.40396 | 38.31883 | 38.26523 | 24.5534  | 27.80844 | 21.10457 |
| 2251  | TOMM22    | 4731.644 | -0.65282 | 0.08697  | -7.50619 | 6.09E-14 | 7.19E-13 | 5613.304 | 6081.745 | 5656.992 | 3729.884 | 3640.766 | 3667.17  |
| 3239  | GPR180    | 1569.089 | -0.65283 | 0.106665 | -6.12032 | 9.34E-10 | 7.67E-09 | 1852.309 | 2051.152 | 1852.037 | 1160.706 | 1264.214 | 1234.115 |
| 9275  | LOC119615 | 210.0378 | -0.65286 | 0.214866 | -3.03844 | 0.002378 | 0.006816 | 228.7604 | 286.2964 | 251.8548 | 194.195  | 160.4333 | 138.6872 |
| 6202  | MTX1      | 633.72   | -0.65297 | 0.16033  | -4.07269 | 4.65E-05 | 0.000199 | 826.1396 | 691.9285 | 809.1356 | 546.8711 | 393.5964 | 534.6491 |
| 2466  | ACTL6A    | 2205.631 | -0.65329 | 0.091084 | -7.17244 | 7.37E-13 | 7.94E-12 | 2694.711 | 2696.551 | 2700.133 | 1698.649 | 1709.149 | 1734.595 |
| 3286  | PRPF4     | 2891.2   | -0.65336 | 0.10793  | -6.05352 | 1.42E-09 | 1.15E-08 | 3691.608 | 3517.121 | 3405.605 | 2151.77  | 2070.659 | 2510.439 |
| 16738 | SAMD10    | 41.15911 | -0.65342 | 0.42532  | -1.5363  | 0.124464 | 0.197686 | 43.36691 | 61.85754 | 44.52681 | 35.71403 | 36.36488 | 25.12449 |
| 3713  | SRSF3     | 8130.858 | -0.65358 | 0.116041 | -5.63226 | 1.78E-08 | 1.27E-07 | 10518.1  | 8480.504 | 10833.23 | 5991.029 | 6126.413 | 6835.87  |
| 8607  | LOC103220 | 181.0873 | -0.65359 | 0.202579 | -3.22634 | 0.001254 | 0.003873 | 224.9658 | 214.5854 | 224.0255 | 145.0883 | 141.1813 | 136.6772 |
| 12722 | LOC103220 | 103.3715 | -0.65389 | 0.290239 | -2.25295 | 0.024262 | 0.0507   | 144.7371 | 102.9134 | 133.5804 | 80.35657 | 64.17332 | 94.46807 |
| 21363 | TRNAI-AAI | 11.49212 | -0.65393 | 0.795446 | -0.82209 | 0.411027 | 0.511498 | 17.34676 | 7.116354 | 18.08902 | 8.928508 | 6.417332 | 11.05477 |
| 27594 | LOC103240 | 0.631317 | -0.65406 | 3.765776 | -0.17368 | 0.862114 | NA       | 0        | 0        | 2.782925 | 0        | 0        | 1.004979 |
| 6943  | CENPM     | 1621.875 | -0.65416 | 0.173953 | -3.76054 | 0.00017  | 0.000649 | 2274.594 | 1446.262 | 2234.689 | 1194.188 | 1127.311 | 1454.205 |
| 3303  | INTS13    | 1412.143 | -0.65419 | 0.108361 | -6.03711 | 1.57E-09 | 1.26E-08 | 1709.74  | 1839.304 | 1632.882 | 1049.1   | 1127.311 | 1114.522 |
| 4005  | SUV39H1   | 863.6186 | -0.65427 | 0.12182  | -5.37079 | 7.84E-08 | 5.20E-07 | 1070.078 | 1055.41  | 1049.163 | 631.6919 | 641.7332 | 733.635  |
| 11740 | LOC103220 | 111.4898 | -0.65434 | 0.26595  | -2.46039 | 0.013879 | 0.031428 | 138.232  | 146.7064 | 122.4487 | 80.35657 | 104.8164 | 76.37844 |
| 6326  | ZFP69     | 363.8729 | -0.65438 | 0.163069 | -4.0129  | 6.00E-05 | 0.000252 | 412.5277 | 495.9551 | 427.1791 | 276.7837 | 282.3626 | 288.4291 |
| 3917  | DHRS11    | 1186.643 | -0.65451 | 0.120466 | -5.43318 | 5.54E-08 | 3.76E-07 | 1514.047 | 1388.784 | 1458.949 | 859.3689 | 870.618  | 1028.094 |
| 24999 | LOC119620 | 0.86036  | -0.65454 | 2.666169 | -0.2455  | 0.806071 | 0.857176 | 1.084173 | 0.547412 | 1.391463 | 0        | 2.139111 | 0        |
| 25000 | TRNAG-GC  | 0.86036  | -0.65454 | 2.666169 | -0.2455  | 0.806071 | 0.857176 | 1.084173 | 0.547412 | 1.391463 | 0        | 2.139111 | 0        |
| 4118  | ZBED4     | 1111.596 | -0.65458 | 0.124031 | -5.27753 | 1.31E-07 | 8.45E-07 | 1310.765 | 1502.098 | 1268.318 | 886.1544 | 795.7492 | 906.4915 |
| 3033  | LOC119620 | 2539.65  | -0.65495 | 0.102931 | -6.36295 | 1.98E-10 | 1.73E-09 | 3187.468 | 3103.825 | 3036.867 | 1828.112 | 1920.921 | 2160.706 |
| 2952  | PIPAK2B   | 6253.031 | -0.65562 | 0.101085 | -6.4858  | 8.83E-11 | 7.95E-10 | 7467.24  | 8225.957 | 7264.827 | 4712.02  | 4549.888 | 5298.252 |
| 9239  | LOC119620 | 245.3807 | -0.65587 | 0.215398 | -3.04491 | 0.002327 | 0.006697 | 266.1644 | 371.1452 | 262.9865 | 212.0521 | 168.9897 | 190.9461 |
| 5322  | LOC119620 | 447.7566 | -0.65609 | 0.14555  | -4.50769 | 6.55E-06 | 3.27E-05 | 552.386  | 524.4205 | 565.6296 | 374.9973 | 329.423  | 339.6831 |
| 3818  | PNPO      | 1399.636 | -0.65646 | 0.118758 | -5.52773 | 3.24E-08 | 2.26E-07 | 1747.144 | 1770.33  | 1625.924 | 1120.528 | 954.0434 | 1179.846 |
| 16712 | ANO5      | 44.67304 | -0.6567  | 0.426505 | -1.53972 | 0.12363  | 0.196667 | 59.08741 | 54.74118 | 48.00546 | 40.17829 | 44.92132 | 21.10457 |
| 15345 | STYK1     | 50.36974 | -0.65679 | 0.370784 | -1.77136 | 0.0765   | 0.132536 | 68.30288 | 60.2153  | 55.65851 | 37.94616 | 44.92132 | 35.17428 |
| 4605  | HNRNPM    | 8776.088 | -0.65704 | 0.132979 | -4.94096 | 7.77E-07 | 4.49E-06 | 9580.292 | 13106.68 | 9539.173 | 6636.114 | 6423.749 | 7370.519 |
| 24987 | OLAH      | 0.87675  | -0.65718 | 2.653182 | -0.24769 | 0.80437  | 0.855825 | 0.542086 | 1.094824 | 1.391463 | 2.232127 | 0        | 0        |
| 20894 | LOC103220 | 12.97812 | -0.65738 | 0.737698 | -0.89112 | 0.372864 | 0.474423 | 13.55216 | 15.32753 | 19.48048 | 11.16063 | 4.278221 | 14.06971 |
| 3725  | BAG2      | 2509.47  | -0.65763 | 0.1171   | -5.61601 | 1.95E-08 | 1.39E-07 | 2972.26  | 3485.371 | 2753.009 | 1993.289 | 2010.764 | 1842.127 |
| 3497  | NUP50     | 5655.92  | -0.65766 | 0.11229  | -5.85679 | 4.72E-09 | 3.59E-08 | 6414.508 | 7945.135 | 6413.948 | 4247.738 | 4278.221 | 4635.97  |
| 4129  | ALCAM     | 5350.867 | -0.65773 | 0.124774 | -5.27131 | 1.35E-07 | 8.72E-07 | 6006.859 | 7852.622 | 5790.572 | 4140.596 | 4100.675 | 4213.879 |
| 1642  | SEPTIN2   | 32482.17 | -0.65795 | 0.074164 | -8.87161 | 7.21E-19 | 1.17E-17 | 39461.72 | 39674.77 | 40151.35 | 25397.14 | 25305.68 | 24902.39 |
| 15549 | LOC103240 | 64.22129 | -0.65835 | 0.379337 | -1.73552 | 0.082649 | 0.141302 | 89.98634 | 54.74118 | 93.228   | 42.41041 | 40.6431  | 64.31869 |
| 12193 | LOC103215 | 108.4003 | -0.65851 | 0.2781   | -2.36788 | 0.01789  | 0.039012 | 138.7741 | 133.0211 | 123.1445 | 93.74933 | 98.39909 | 63.31371 |
| 23714 | LOC119620 | 2.732807 | -0.65854 | 1.456844 | -0.45203 | 0.651248 | 0.730093 | 3.252518 | 3.284471 | 3.478657 | 2.232127 | 2.139111 | 2.009959 |
| 2481  | RHOT1     | 2894.872 | -0.65868 | 0.092079 | -7.15338 | 8.47E-13 | 9.07E-12 | 3451.464 | 3730.612 | 3449.436 | 2274.537 | 2248.205 | 2214.975 |
| 20460 | LOC119620 | 17.99354 | -0.65885 | 0.691804 | -0.95236 | 0.340913 | 0.44297  | 21.68345 | 21.34906 | 21.56767 | 20.08914 | 19.252   | 4.019918 |
| 1928  | SEMA3C    | 22032.75 | -0.65896 | 0.080937 | -8.14156 | 3.90E-16 | 5.38E-15 | 27013.25 | 27968.91 | 25959.13 | 16845.86 | 16725.71 | 17683.62 |
| 4470  | FAM120AC  | 1398.602 | -0.65909 | 0.131069 | -5.02858 | 4.94E-07 | 2.94E-06 | 1711.367 | 1956.45  | 1471.472 | 1089.278 | 1037.469 | 1125.577 |
| 12151 | LOC103240 | 126.9687 | -0.65934 | 0.277603 | -2.37513 | 0.017543 | 0.038382 | 169.1309 | 116.5987 | 179.4987 | 118.3027 | 89.84265 | 88.43819 |
| 23681 | LOC119620 | 3.147185 | -0.65946 | 1.445618 | -0.45618 | 0.64826  | 0.727694 | 1.626259 | 5.474118 | 4.174388 | 4.464254 | 2.139111 | 1.004979 |
| 7043  | NUFIP1    | 412.2063 | -0.6598  | 0.177592 | -3.71524 | 0.000203 | 0.000766 | 447.2213 | 607.0797 | 460.5742 | 294.6408 | 340.1186 | 323.6034 |
| 2919  | ELAVL1    | 4298.364 | -0.65985 | 0.101087 | -6.52758 | 6.68E-11 | 6.09E-10 | 5159.578 | 5631.225 | 5009.962 | 3071.407 | 3341.291 | 3576.722 |
| 4632  | LOC103240 | 596.9976 | -0.65986 | 0.133878 | -4.92881 | 8.27E-07 | 4.75E-06 | 721.517  | 746.6697 | 721.4734 | 506.6928 | 453.4915 | 432.1412 |
| 8146  | FOXCl     | 733.7371 | -0.66007 | 0.196119 | -3.36568 | 0.000764 | 0.002492 | 724.2274 | 1200.474 | 768.7832 | 555.7996 | 639.5941 | 513.5445 |
| 2147  | MTPN      | 19782.94 | -0.6603  | 0.085905 | -7.68644 | 1.51E-14 | 1.87E-13 | 24934.89 | 23722.09 | 24050.74 | 14644.99 | 14941.69 | 16403.27 |
| 16699 | LOC103220 | 37.67315 | -0.66034 | 0.427969 | -1.54297 | 0.122839 | 0.195561 | 50.95612 | 41.05589 | 47.30973 | 29.01765 | 23.53022 | 34.1693  |
| 14059 | LOC119620 | 67.90308 | -0.66043 | 0.329877 | -2.00205 | 0.04528  | 0.085622 | 93.23886 | 74.44801 | 83.48776 | 46.87467 | 47.06043 | 62.30873 |
| 3990  | DAZAP1    | 3775.684 | -0.66046 | 0.122727 | -5.38154 | 7.38E-08 | 4.92E-07 | 4162.681 | 5480.14  | 4231.438 | 2915.158 | 2973.364 | 2891.326 |
| 23073 | MC5R      | 4.523665 | -0.66059 | 1.199701 | -0.55063 | 0.581888 | 0.670458 | 7.047123 | 4.379295 | 4.87012  | 6.696381 | 2.139111 | 2.009959 |
| 3824  | ZNF580    | 1645.886 | -0.6606  | 0.11965  | -5.52105 | 3.37E-08 | 2.34E-07 | 2114.137 | 1823.429 | 2115.023 | 1337.044 | 1138.007 | 1347.677 |
| 4622  | HNRNPC    | 34697.28 | -0.66071 | 0.133925 | -4.93345 | 8.08E-07 | 4.65E-06 | 37199.05 | 52490.22 | 37825.52 | 27470.79 | 28255.51 | 24942.59 |
| 8666  | YIF1A     | 1443.542 | -0.66079 | 0.205689 | -3.21259 | 0.001315 | 0.004035 | 2194.366 | 1111.793 | 2002.315 | 1080.349 | 1018.217 | 1254.214 |
| 11077 | LOC119618 | 119.2794 | -0.661   | 0.25324  | -2.61016 | 0.00905  | 0.02172  | 150.7    | 139.0426 | 150.9737 | 89.28508 | 79.14709 | 106.5278 |
| 9701  | CCDC17    | 156.0945 | -0.66145 | 0.225851 | -2.92872 | 0.003404 | 0.009327 | 200.572  | 170.2451 | 203.1536 | 109.3742 | 132.6249 | 120.5975 |
| 2783  | AKIRIN1   | 2676.207 | -0.66147 | 0.098354 | -6.72543 | 1.75E-11 | 1.67E-10 | 3339.794 | 3282.829 | 3220.541 | 1897.308 | 2136.972 | 2179.8   |
| 7210  | AGER      | 352.459  | -0.66149 | 0.180569 | -3.66337 | 0.000249 | 0.000918 | 373.4975 | 504.1663 |          |          |          |          |



|       |           |          |          |          |          |          |          |          |          |          |          |          |          |
|-------|-----------|----------|----------|----------|----------|----------|----------|----------|----------|----------|----------|----------|----------|
| 6980  | EMC9      | 678.7942 | -0.66213 | 0.176987 | -3.74112 | 0.000183 | 0.000698 | 892.2742 | 656.3468 | 951.0648 | 544.639  | 438.5177 | 589.9229 |
| 5213  | TRMT44    | 469.0249 | -0.66216 | 0.144805 | -4.57279 | 4.81E-06 | 2.45E-05 | 605.5105 | 570.9505 | 551.0192 | 341.5154 | 357.2315 | 387.9221 |
| 7776  | LOC10324  | 926.0722 | -0.66237 | 0.190818 | -3.47121 | 0.000518 | 0.001771 | 1336.243 | 809.0747 | 1264.144 | 698.6557 | 618.203  | 830.113  |
| 7432  | LOC10322  | 245.3563 | -0.66256 | 0.184734 | -3.58653 | 0.000335 | 0.001199 | 316.5784 | 276.9904 | 310.2962 | 189.7308 | 177.5462 | 200.9959 |
| 7201  | TWIST2    | 328.412  | -0.66279 | 0.180776 | -3.66638 | 0.000246 | 0.000908 | 421.2011 | 375.5245 | 416.0474 | 209.8199 | 252.4151 | 295.464  |
| 5267  | CCDC43    | 1701.815 | -0.6628  | 0.145901 | -4.5428  | 5.55E-06 | 2.80E-05 | 1874.535 | 2581.594 | 1801.944 | 1305.794 | 1313.414 | 1333.608 |
| 2519  | RAN       | 19740.63 | -0.66319 | 0.093426 | -7.09852 | 1.26E-12 | 1.33E-11 | 25744.77 | 21946.83 | 24909.97 | 15495.43 | 14721.36 | 15625.42 |
| 12457 | LOC11962  | 102.1004 | -0.66338 | 0.287267 | -2.30927 | 0.020928 | 0.044665 | 115.4644 | 151.0857 | 107.1426 | 89.28508 | 81.28621 | 68.3386  |
| 24583 | LOC10322  | 1.838982 | -0.66341 | 2.080428 | -0.31888 | 0.749816 | 0.810879 | 2.710432 | 0        | 4.174388 | 0        | 2.139111 | 2.009959 |
| 24012 | LOC11961  | 2.244827 | -0.66353 | 1.639218 | -0.40479 | 0.685635 | 0.759104 | 1.626259 | 4.379295 | 2.087194 | 2.232127 | 2.139111 | 1.004979 |
| 8697  | LOC11962  | 209.8845 | -0.66355 | 0.207095 | -3.20411 | 0.001355 | 0.004141 | 287.3058 | 228.2707 | 258.1163 | 140.624  | 171.1289 | 173.8614 |
| 4101  | TP53      | 3066.878 | -0.66357 | 0.125301 | -5.29584 | 1.18E-07 | 7.68E-07 | 3397.797 | 4391.338 | 3496.05  | 2234.359 | 2305.961 | 2575.762 |
| 3258  | CTPS2     | 2169.603 | -0.6639  | 0.109055 | -6.08773 | 1.15E-09 | 9.34E-09 | 2528.833 | 2899.093 | 2558.204 | 1651.774 | 1580.803 | 1798.913 |
| 5169  | PLAGL1    | 708.7435 | -0.66476 | 0.144684 | -4.59455 | 4.34E-06 | 2.23E-05 | 818.5504 | 998.4791 | 792.438  | 558.0317 | 509.1083 | 575.8532 |
| 23791 | LOC10323  | 2.811734 | -0.66486 | 1.51946  | -0.43756 | 0.661703 | 0.739413 | 3.252518 | 3.284471 | 4.174388 | 0        | 2.139111 | 4.019918 |
| 8324  | LOC11962  | 435.4129 | -0.66506 | 0.201095 | -3.30721 | 0.000942 | 0.00301  | 653.7562 | 390.3046 | 557.2808 | 359.3724 | 325.1448 | 326.6183 |
| 5253  | MIS18BP1  | 1990.055 | -0.66513 | 0.146136 | -4.55145 | 5.33E-06 | 2.70E-05 | 2144.494 | 3040.873 | 2137.983 | 1506.686 | 1529.464 | 1580.833 |
| 4341  | ZNF334    | 959.9905 | -0.66533 | 0.129795 | -5.12598 | 2.96E-07 | 1.81E-06 | 1126.455 | 1333.495 | 1072.818 | 729.9055 | 746.5496 | 750.7197 |
| 4685  | ACAD10    | 1388.49  | -0.66579 | 0.136066 | -4.89311 | 9.93E-07 | 5.63E-06 | 1965.605 | 1465.969 | 1682.278 | 1060.26  | 1001.104 | 1155.726 |
| 4684  | TRMT1     | 1545.825 | -0.66582 | 0.136064 | -4.89344 | 9.91E-07 | 5.62E-06 | 2116.305 | 1598.99  | 1977.269 | 1234.366 | 1071.694 | 1276.324 |
| 4855  | ZNF770    | 5277.52  | -0.66585 | 0.139357 | -4.77806 | 1.77E-06 | 9.69E-06 | 5529.281 | 8071.587 | 5823.272 | 3968.722 | 4049.336 | 4222.924 |
| 5669  | BTBD6     | 693.571  | -0.66595 | 0.153464 | -4.33948 | 1.43E-05 | 6.70E-05 | 877.6378 | 748.312  | 932.9758 | 517.8535 | 470.6043 | 614.0425 |
| 2541  | PTAR1     | 4641.974 | -0.666   | 0.094278 | -7.06423 | 1.62E-12 | 1.69E-11 | 5620.351 | 5940.513 | 5531.76  | 3392.833 | 3510.281 | 3856.106 |
| 10131 | CEL       | 137.6517 | -0.66605 | 0.235261 | -2.83109 | 0.004639 | 0.012173 | 183.2252 | 164.2235 | 160.7139 | 104.91   | 96.25998 | 116.5776 |
| 10148 | PLCH2     | 136.5836 | -0.66616 | 0.235698 | -2.82633 | 0.004708 | 0.012335 | 177.2622 | 154.3701 | 171.1499 | 116.0706 | 94.12087 | 106.5278 |
| 3599  | MTDH      | 10331.53 | -0.66616 | 0.115994 | -5.7431  | 9.30E-09 | 6.87E-08 | 11879.82 | 14903.83 | 11242.32 | 7928.515 | 7976.744 | 8057.925 |
| 3237  | PHF5A     | 3094.675 | -0.6662  | 0.10878  | -6.12425 | 9.11E-10 | 7.48E-09 | 3900.854 | 3368.772 | 4117.338 | 2441.947 | 2457.838 | 2281.303 |
| 6681  | NR6A1     | 328.0973 | -0.66652 | 0.172448 | -3.86504 | 0.000111 | 0.000442 | 403.3123 | 423.1493 | 384.0437 | 212.0521 | 271.6671 | 274.3594 |
| 21813 | LOC11962  | 8.217272 | -0.66656 | 0.879537 | -0.75785 | 0.44854  | 0.546635 | 8.673382 | 13.13788 | 8.348776 | 6.696381 | 6.417332 | 6.029877 |
| 3781  | MGME1     | 1453.523 | -0.66675 | 0.119847 | -5.56332 | 2.65E-08 | 1.86E-07 | 1812.195 | 1901.161 | 1637.056 | 1225.438 | 1009.66  | 1135.627 |
| 7288  | GPC6      | 231.7719 | -0.66683 | 0.183285 | -3.63822 | 0.000275 | 0.001001 | 288.3899 | 283.5593 | 281.0755 | 189.7308 | 168.9897 | 178.8863 |
| 21120 | LOC11962  | 10.90529 | -0.66721 | 0.77429  | -0.8617  | 0.388852 | 0.489448 | 10.84173 | 14.23271 | 14.61036 | 11.16063 | 8.556443 | 6.029877 |
| 24078 | TRNAN-GL  | 2.324642 | -0.66744 | 1.696435 | -0.39344 | 0.693997 | 0.766256 | 1.084173 | 4.926706 | 2.782925 | 0        | 2.139111 | 3.014938 |
| 3013  | RBMX      | 17337.71 | -0.6676  | 0.104334 | -6.39864 | 1.57E-10 | 1.38E-09 | 19890.23 | 24288.11 | 19659.28 | 13142.76 | 13529.87 | 13515.97 |
| 3766  | DDX11     | 969.0437 | -0.66771 | 0.119681 | -5.57905 | 2.42E-08 | 1.71E-07 | 1155.186 | 1244.267 | 1170.916 | 787.9408 | 678.0981 | 777.8541 |
| 3386  | TTC17     | 3179.882 | -0.66775 | 0.112122 | -5.95557 | 2.59E-09 | 2.03E-08 | 3684.019 | 4449.911 | 3575.364 | 2475.429 | 2402.221 | 2492.349 |
| 2536  | TMEM181   | 3584.65  | -0.66804 | 0.094464 | -7.07185 | 1.53E-12 | 1.60E-11 | 4422.341 | 4539.139 | 4241.178 | 2883.908 | 2571.211 | 2850.122 |
| 24175 | KRT25     | 2.230212 | -0.66824 | 1.766467 | -0.37829 | 0.705215 | 0.775517 | 1.084173 | 4.926706 | 2.087194 | 0        | 4.278221 | 1.004979 |
| 2409  | HAUS4     | 4054.757 | -0.66826 | 0.092    | -7.26371 | 3.77E-13 | 4.16E-12 | 5139.521 | 4648.074 | 5147.716 | 3104.889 | 3082.458 | 3205.885 |
| 5848  | HNRNPA3   | 5816.223 | -0.66844 | 0.157299 | -4.24948 | 2.14E-05 | 9.74E-05 | 6018.243 | 9384.281 | 6017.381 | 4343.719 | 4618.34  | 4515.373 |
| 19367 | LOC11962  | 20.77934 | -0.66855 | 0.594163 | -1.12519 | 0.260509 | 0.357599 | 32.52518 | 23.53871 | 20.87194 | 20.08914 | 8.556443 | 19.09461 |
| 4226  | EPRS1     | 22492.96 | -0.66876 | 0.128603 | -5.20016 | 1.99E-07 | 1.25E-06 | 24961.45 | 33749.58 | 24135.62 | 17057.91 | 16903.25 | 18149.93 |
| 2659  | GTF3C3    | 2712.911 | -0.66877 | 0.097202 | -6.88025 | 5.97E-12 | 5.97E-11 | 3441.164 | 3344.686 | 3212.887 | 2046.86  | 1995.79  | 2236.079 |
| 13209 | LOC10324  | 165.4171 | -0.6689  | 0.30884  | -2.16584 | 0.030323 | 0.061029 | 257.491  | 126.4521 | 226.8084 | 147.3204 | 87.70354 | 146.727  |
| 8189  | DNAH10    | 273.5438 | -0.66911 | 0.199766 | -3.34948 | 0.00081  | 0.002628 | 319.831  | 378.2616 | 304.7303 | 238.8376 | 262.7457 | 172.8565 |
| 19295 | LOC10324  | 23.2355  | -0.66913 | 0.588821 | -1.13638 | 0.255796 | 0.35244  | 35.23561 | 18.612   | 30.61218 | 26.78552 | 17.11289 | 11.05477 |
| 3563  | THOP1     | 2706.307 | -0.66917 | 0.115556 | -5.79088 | 7.00E-09 | 5.22E-08 | 3469.353 | 3060.579 | 3448.74  | 1917.397 | 1985.095 | 2356.677 |
| 11804 | LOC11962  | 125.2409 | -0.66924 | 0.273393 | -2.44791 | 0.014369 | 0.032361 | 192.4407 | 128.6418 | 138.4505 | 102.6778 | 104.8164 | 84.41828 |
| 3453  | CENPV     | 1839.097 | -0.66924 | 0.113464 | -5.8983  | 3.67E-09 | 2.83E-08 | 2388.975 | 2006.812 | 2379.401 | 1470.972 | 1358.335 | 1430.086 |
| 5076  | LOC10324  | 731.7671 | -0.6693  | 0.144096 | -4.64483 | 3.40E-06 | 1.78E-05 | 835.8972 | 1040.63  | 820.963  | 553.5675 | 547.613  | 591.9329 |
| 3064  | ARL5B     | 2798.399 | -0.6693  | 0.10597  | -6.31594 | 2.69E-10 | 2.33E-09 | 3210.235 | 3818.745 | 3276.895 | 2194.181 | 2181.893 | 2108.447 |
| 2575  | SLC25A32  | 2263.802 | -0.66932 | 0.095395 | -7.0163  | 2.28E-12 | 2.35E-11 | 2865.469 | 2637.43  | 2837.193 | 1761.148 | 1719.845 | 1761.729 |
| 2282  | RPL37A    | 26618.92 | -0.66966 | 0.08996  | -7.44399 | 9.77E-14 | 1.14E-12 | 34385.08 | 30119.69 | 33562.78 | 20999.85 | 19619.92 | 21026.18 |
| 2841  | NSL1      | 2873.925 | -0.66989 | 0.101033 | -6.63042 | 3.35E-11 | 3.13E-10 | 3493.747 | 3430.63  | 3656.068 | 2252.216 | 2380.83  | 2030.059 |
| 2913  | SMIM15    | 3493.173 | -0.66993 | 0.102588 | -6.5303  | 6.56E-11 | 5.99E-10 | 4084.079 | 4722.522 | 4067.246 | 2611.589 | 2654.636 | 2818.967 |
| 3507  | NOLC1     | 7197     | -0.67022 | 0.114579 | -5.84941 | 4.93E-09 | 3.74E-08 | 8171.41  | 10089.89 | 8263.201 | 5361.569 | 5225.847 | 6070.076 |
| 3186  | ALKBH3    | 1555.326 | -0.67089 | 0.108572 | -6.17922 | 6.44E-10 | 5.38E-09 | 1786.717 | 2054.437 | 1890.302 | 1243.295 | 1157.259 | 1199.945 |
| 4302  | ERCC6L    | 1936.38  | -0.67099 | 0.130203 | -5.15344 | 2.56E-07 | 1.58E-06 | 2143.952 | 2797.274 | 2198.511 | 1464.275 | 1420.369 | 1593.897 |
| 2109  | EDF1      | 8311.489 | -0.67105 | 0.086192 | -7.78558 | 6.94E-15 | 8.75E-14 | 9930.48  | 10644.97 | 10058.88 | 6562.453 | 6081.492 | 6590.655 |
| 24454 | LOC10324  | 1.788325 | -0.67159 | 1.990395 | -0.33742 | 0.735803 | 0.799946 | 0.542086 | 1.642235 | 4.174388 | 2.232127 | 2.139111 | 0        |
| 4141  | DPM2      | 1025.773 | -0.6716  | 0.127592 | -5.26363 | 1.41E-07 | 9.07E-07 | 1221.321 | 1415.06  | 1145.87  | 799.1015 | 757.2452 | 816.0433 |
| 10382 | CCDC163   | 141.4531 | -0.67199 | 0.242642 | -2.76947 | 0.005615 | 0.014378 | 180.5148 | 154.9175 | 185.7603 | 91.51721 | 130.4858 | 105.5228 |
| 6965  | LOC10324  | 301.1406 | -0.67209 | 0.179189 | -3.75071 | 0.000176 | 0.000673 | 361.0295 | 328.4471 | 420.9175 | 232.1412 | 233.1631 | 231.1453 |
| 4517  | KNOP1     | 1974.887 | -0.6721  | 0.13436  | -5.00227 | 5.67E-07 | 3.33E-06 | 2248.574 | 2900.735 | 2133.112 | 1513.382 | 1454.595 | 1598.922 |
| 3248  | CDK4      | 6083.991 | -0.67227 | 0.110198 | -6.10055 | 1.06E-09 | 8.65E-09 | 8075.461 | 6564.015 | 7795.67  | 4665.145 | 4378.76  | 5024.897 |
| 5241  | HNRNPAB   | 8078.801 | -0.67254 | 0.147538 | -4.55843 | 5.15E-06 | 2.61E-05 | 8521.598 | 12716.92 | 8548.451 | 6238.795 | 5931.754 | 6515.282 |
| 4007  | CDON      | 973.1036 | -0.67289 | 0.125344 | -5.36838 | 7.94E-08 | 5.27E-07 | 1216.984 | 1272.185 | 1104.126 | 703.12   | 725.1585 | 817.0483 |
| 7011  | PKMYT1    | 768.1738 | -0.67292 | 0.180447 | -3.72919 | 0.000192 | 0.000728 | 1059.779 | 701.2345 | 1075.601 | 542.4069 | 564.7252 | 665.2964 |
| 21506 | LOC10323  | 9.586654 | -0.67299 | 0.8384   | -0.80271 | 0.422141 | 0.521854 | 9.757555 | 9.853413 | 15.30609 | 11.16063 | 6.417332 | 5.024897 |
| 3193  | CUNH4orf4 | 1202.008 | -0.67312 | 0.109129 | -6.16808 | 6.91E-10 | 5.76E-09 | 1487.485 | 1430.934 | 1511.824 | 895.0829 | 988.2691 | 898.4516 |
| 7844  | FAAP100   | 1585.307 | -0.67329 | 0.194884 | -3.45481 | 0.000551 | 0.001866 | 2344.524 | 1283.133 | 2222.166 | 1        |          |          |



|       |           |          |          |          |          |          |          |          |          |          |          |          |          |
|-------|-----------|----------|----------|----------|----------|----------|----------|----------|----------|----------|----------|----------|----------|
| 19311 | STPG2     | 23.26188 | -0.67384 | 0.595095 | -1.13233 | 0.257497 | 0.354432 | 31.44101 | 25.72836 | 27.13352 | 31.24978 | 14.97377 | 9.044815 |
| 3567  | GOLT1B    | 3325.362 | -0.67447 | 0.116524 | -5.78825 | 7.11E-09 | 5.30E-08 | 4187.075 | 3594.853 | 4478.423 | 2685.249 | 2676.027 | 2330.547 |
| 4016  | KIF20A    | 3047.214 | -0.6745  | 0.125867 | -5.3588  | 8.38E-08 | 5.55E-07 | 3517.598 | 4388.601 | 3338.815 | 2225.431 | 2280.292 | 2532.548 |
| 3297  | IDUA      | 1591.235 | -0.67458 | 0.111597 | -6.0448  | 1.50E-09 | 1.21E-08 | 1916.275 | 1911.562 | 2050.32  | 1171.867 | 1148.702 | 1348.682 |
| 4343  | ARNTL     | 1082.048 | -0.67461 | 0.131634 | -5.12485 | 2.98E-07 | 1.82E-06 | 1243.546 | 1525.637 | 1225.183 | 803.5657 | 815.0012 | 879.357  |
| 16294 | GP1BB     | 47.09004 | -0.67472 | 0.419497 | -1.60842 | 0.107744 | 0.175801 | 57.46116 | 51.45671 | 66.79021 | 20.08914 | 38.50399 | 48.23901 |
| 4534  | SUMF2     | 3733.894 | -0.67477 | 0.135149 | -4.99279 | 5.95E-07 | 3.49E-06 | 5178.009 | 3688.461 | 4912.559 | 2669.624 | 2866.408 | 3088.302 |
| 22061 | LOC119625 | 7.647286 | -0.67498 | 0.944186 | -0.71489 | 0.47468  | 0.572022 | 9.757555 | 8.211177 | 9.740239 | 4.464254 | 10.69555 | 3.014938 |
| 22342 | LOC119625 | 7.269581 | -0.6752  | 1.010555 | -0.66815 | 0.504041 | 0.599737 | 13.55216 | 3.284471 | 9.740239 | 4.464254 | 8.556443 | 4.019918 |
| 2632  | GPNMB     | 98542.37 | -0.6754  | 0.097549 | -6.92366 | 4.40E-12 | 4.45E-11 | 116653.7 | 133331.5 | 113610.8 | 74267.33 | 72220.65 | 81170.18 |
| 16839 | LOC103238 | 34.82538 | -0.6755  | 0.445018 | -1.51792 | 0.129033 | 0.203714 | 37.40396 | 49.26706 | 41.74388 | 22.32127 | 32.08666 | 26.12947 |
| 6379  | LRCC1     | 855.3358 | -0.67556 | 0.169387 | -3.98828 | 6.66E-05 | 0.000277 | 931.3044 | 1336.232 | 886.3618 | 669.6381 | 682.3763 | 626.1022 |
| 8366  | MNX1      | 242.859  | -0.67565 | 0.20513  | -3.29379 | 0.000988 | 0.003141 | 307.363  | 267.137  | 322.1236 | 220.9806 | 147.5986 | 191.9511 |
| 15362 | LOC103248 | 57.51384 | -0.67584 | 0.382532 | -1.76676 | 0.077268 | 0.133706 | 86.19173 | 47.62483 | 78.61764 | 44.64254 | 42.78221 | 45.22408 |
| 3907  | RHOD      | 763.781  | -0.6759  | 0.124258 | -5.43948 | 5.34E-08 | 3.64E-07 | 928.594  | 930.0527 | 961.5008 | 622.7634 | 534.7777 | 604.9976 |
| 4431  | BUB1      | 4591.873 | -0.67594 | 0.133636 | -5.05806 | 4.24E-07 | 2.54E-06 | 5078.807 | 6932.971 | 4933.431 | 3537.921 | 3480.333 | 3587.777 |
| 2983  | UGDH      | 22064.52 | -0.67602 | 0.104826 | -6.44896 | 1.13E-10 | 1.00E-09 | 25424.39 | 30229.18 | 25778.24 | 16598.1  | 15895.73 | 18461.47 |
| 3638  | UBASH3B   | 11364.97 | -0.6761  | 0.118541 | -5.7035  | 1.17E-08 | 8.58E-08 | 12900.57 | 16483.66 | 12560.04 | 8589.225 | 8419.54  | 9236.766 |
| 2873  | CZIB      | 1461.29  | -0.67626 | 0.102754 | -6.58136 | 4.66E-11 | 4.31E-10 | 1747.686 | 1869.411 | 1778.289 | 1087.046 | 1131.59  | 1153.716 |
| 12699 | CCDC168   | 143.079  | -0.67641 | 0.299424 | -2.25902 | 0.023882 | 0.049996 | 135.5216 | 250.1672 | 141.9292 | 95.98146 | 128.3466 | 106.5278 |
| 3775  | IGF2BP3   | 5514.105 | -0.67646 | 0.121423 | -5.57106 | 2.53E-08 | 1.78E-07 | 6118.529 | 8060.639 | 6172.529 | 4158.453 | 4261.108 | 4313.372 |
| 11220 | TRNAG-CC  | 606.6638 | -0.67651 | 0.262518 | -2.57699 | 0.009967 | 0.023615 | 484.6252 | 1163.798 | 588.5887 | 495.5322 | 498.4128 | 409.0266 |
| 17752 | LOC119625 | 57.56895 | -0.6768  | 0.491567 | -1.37683 | 0.168565 | 0.252436 | 100.8281 | 26.27577 | 86.27069 | 42.41041 | 36.36488 | 53.26391 |
| 2921  | TRIM25    | 4550.5   | -0.67687 | 0.10378  | -6.52212 | 6.93E-11 | 6.31E-10 | 5455.557 | 5961.315 | 5389.135 | 3339.262 | 3283.535 | 3874.196 |
| 3054  | G6PC3     | 1965.677 | -0.6772  | 0.106901 | -6.33482 | 2.38E-10 | 2.07E-09 | 2371.628 | 2509.336 | 2383.576 | 1455.347 | 1413.952 | 1660.226 |
| 13622 | LOC119618 | 135.0899 | -0.67758 | 0.325031 | -2.08465 | 0.037101 | 0.072408 | 130.1007 | 248.525  | 118.2743 | 113.8385 | 113.3729 | 86.42823 |
| 4150  | CHCHD3    | 5748.61  | -0.67759 | 0.128877 | -5.25765 | 1.46E-07 | 9.35E-07 | 6310.427 | 8594.365 | 6318.632 | 4316.934 | 4460.046 | 4491.253 |
| 2554  | KDM5C     | 6836.318 | -0.67772 | 0.096263 | -7.04032 | 1.92E-12 | 2.00E-11 | 8621.342 | 8443.28  | 8184.584 | 5160.678 | 4851.503 | 5756.522 |
| 3243  | NUP188    | 3543.984 | -0.67822 | 0.111067 | -6.10637 | 1.02E-09 | 8.36E-09 | 4496.064 | 4387.506 | 4211.958 | 2703.106 | 2400.082 | 3065.187 |
| 19875 | RAB3C     | 16.08326 | -0.67832 | 0.648793 | -1.04551 | 0.295788 | 0.395012 | 16.26259 | 25.18094 | 18.08902 | 8.928508 | 14.97377 | 13.06473 |
| 24582 | FUCA1     | 1.38003  | -0.67862 | 2.127893 | -0.31892 | 0.749789 | 0.810879 | 3.252518 | 1.094824 | 0.695731 | 2.232127 | 0        | 1.004979 |
| 12391 | LOC103227 | 91.07055 | -0.67863 | 0.292165 | -2.32277 | 0.020191 | 0.043317 | 102.4543 | 111.672  | 124.5359 | 58.0353  | 66.31243 | 83.4133  |
| 20248 | LOC103231 | 16.53667 | -0.67879 | 0.686974 | -0.98808 | 0.323113 | 0.424237 | 18.97302 | 15.32753 | 27.13352 | 4.464254 | 19.252   | 14.06971 |
| 5054  | DMAC1     | 1628.366 | -0.67883 | 0.145717 | -4.65853 | 3.18E-06 | 1.68E-05 | 2220.386 | 1569.977 | 2222.166 | 1258.92  | 1287.745 | 1211     |
| 2633  | USP36     | 3073.479 | -0.67918 | 0.098134 | -6.92092 | 4.49E-12 | 4.53E-11 | 3796.231 | 3976.947 | 3584.408 | 2238.823 | 2338.048 | 2506.419 |
| 3157  | METTL21A  | 1027.708 | -0.67919 | 0.10939  | -6.20885 | 5.34E-10 | 4.49E-09 | 1234.873 | 1272.732 | 1286.407 | 805.7978 | 793.6101 | 772.8292 |
| 3253  | STX12     | 1223.241 | -0.67927 | 0.111427 | -6.09609 | 1.09E-09 | 8.88E-09 | 1499.953 | 1609.938 | 1408.16  | 944.1897 | 930.5131 | 946.6907 |
| 19414 | LOC119618 | 18.50965 | -0.67929 | 0.60857  | -1.11621 | 0.264333 | 0.361971 | 23.30971 | 26.27577 | 19.48048 | 8.928508 | 14.97377 | 18.08963 |
| 5053  | GATA2     | 518.6977 | -0.67954 | 0.145841 | -4.65949 | 3.17E-06 | 1.67E-05 | 612.0155 | 700.6871 | 603.8948 | 419.6399 | 367.927  | 408.0217 |
| 17743 | LOC103246 | 49.91505 | -0.67962 | 0.49343  | -1.37733 | 0.168409 | 0.252319 | 87.27591 | 29.56024 | 66.79021 | 58.0353  | 25.66933 | 32.15934 |
| 2866  | LOC103245 | 31275.78 | -0.67965 | 0.103138 | -6.58971 | 4.41E-11 | 4.09E-10 | 40374.59 | 37038.43 | 38126.77 | 23388.23 | 21692.72 | 27033.95 |
| 3587  | DDX31     | 1299.124 | -0.67977 | 0.118023 | -5.75965 | 8.43E-09 | 6.25E-08 | 1581.266 | 1657.563 | 1568.179 | 959.8146 | 913.4003 | 1114.522 |
| 3234  | RPL36     | 14761.32 | -0.67991 | 0.11091  | -6.13027 | 8.77E-10 | 7.21E-09 | 19650.63 | 15387.2  | 19493    | 11593.67 | 11022.84 | 11420.59 |
| 3232  | CRLS1     | 1129.429 | -0.68038 | 0.110968 | -6.13132 | 8.72E-10 | 7.17E-09 | 1429.482 | 1433.672 | 1309.366 | 843.744  | 892.0091 | 868.3023 |
| 3280  | ANKRD10   | 2415.428 | -0.68079 | 0.112392 | -6.05732 | 1.38E-09 | 1.12E-08 | 3255.771 | 2688.887 | 2986.079 | 1761.148 | 1811.827 | 1988.854 |
| 6167  | NUDT15    | 333.6691 | -0.68105 | 0.166508 | -4.09018 | 4.31E-05 | 0.000186 | 396.2651 | 442.8562 | 393.0882 | 281.248  | 235.3022 | 253.2548 |
| 2306  | INTS7     | 2790.712 | -0.68128 | 0.091984 | -7.40659 | 1.30E-13 | 1.49E-12 | 3485.073 | 3443.768 | 3385.429 | 2223.198 | 2030.016 | 2176.786 |
| 6745  | TRAPPC2   | 444.59   | -0.68134 | 0.177459 | -3.83944 | 0.000123 | 0.000486 | 609.8472 | 455.4466 | 581.6314 | 341.5154 | 295.1973 | 383.9022 |
| 3271  | CHAF1A    | 3740.225 | -0.68148 | 0.112186 | -6.0746  | 1.24E-09 | 1.01E-08 | 4412.041 | 5126.512 | 4291.271 | 2678.552 | 2789.4   | 3143.576 |
| 5138  | ZNF347    | 457.6783 | -0.68154 | 0.147915 | -4.60764 | 4.07E-06 | 2.11E-05 | 577.322  | 599.9633 | 514.1455 | 341.5154 | 359.3706 | 353.7528 |
| 3262  | TERF1     | 2512.416 | -0.68183 | 0.11203  | -6.08612 | 1.16E-09 | 9.43E-09 | 3041.647 | 3461.285 | 2784.317 | 1861.594 | 1950.869 | 1974.785 |
| 3794  | KIF22     | 2225.5   | -0.68188 | 0.122822 | -5.55178 | 2.83E-08 | 1.98E-07 | 2983.101 | 2370.293 | 2878.241 | 1642.845 | 1619.307 | 1859.212 |
| 15903 | LOC103231 | 53.36729 | -0.68206 | 0.405049 | -1.68389 | 0.092203 | 0.154136 | 81.31296 | 47.07742 | 67.48594 | 55.80317 | 36.36488 | 32.15934 |
| 2465  | CLNS1A    | 3299.163 | -0.68206 | 0.095081 | -7.17345 | 7.31E-13 | 7.89E-12 | 4227.19  | 3932.059 | 4033.155 | 2703.106 | 2400.082 | 2499.384 |
| 12011 | LOC119626 | 96.01583 | -0.68241 | 0.283824 | -2.40435 | 0.016201 | 0.03586  | 107.3331 | 137.9478 | 108.5341 | 73.66019 | 81.28621 | 67.33362 |
| 3562  | LOC103246 | 1741.582 | -0.68247 | 0.117786 | -5.79416 | 6.87E-09 | 5.12E-08 | 1989.457 | 2409.159 | 2037.797 | 1419.633 | 1274.91  | 1318.533 |
| 3815  | MRPL4     | 1865.361 | -0.68265 | 0.123481 | -5.52837 | 3.23E-08 | 2.25E-07 | 2128.773 | 2651.115 | 2116.415 | 1486.597 | 1354.057 | 1455.21  |
| 14993 | LOC103227 | 113.504  | -0.68291 | 0.372078 | -1.83538 | 0.066449 | 0.11782  | 202.7403 | 73.90059 | 144.7121 | 84.82083 | 66.31243 | 108.5378 |
| 6076  | PAIP2B    | 386.4608 | -0.68299 | 0.165222 | -4.13378 | 3.57E-05 | 0.000156 | 453.7263 | 525.5153 | 452.9211 | 296.8729 | 263.1106 | 326.6183 |
| 18244 | ANKRD31   | 32.3737  | -0.68303 | 0.527963 | -1.2937  | 0.195768 | 0.285272 | 37.40396 | 53.64636 | 27.82925 | 15.62489 | 40.6431  | 19.09461 |
| 2489  | DDX50     | 3654.728 | -0.68305 | 0.095565 | -7.14744 | 8.84E-13 | 9.44E-12 | 4458.66  | 4710.479 | 4349.017 | 2816.944 | 2622.55  | 2970.719 |
| 2690  | EIF3F     | 7476.233 | -0.68317 | 0.099746 | -6.8491  | 7.43E-12 | 7.35E-11 | 9397.067 | 9018.61  | 9236.53  | 5694.156 | 5176.648 | 6334.386 |
| 5911  | CDKL1     | 391.7646 | -0.68383 | 0.162581 | -4.2061  | 2.60E-05 | 0.000117 | 471.0731 | 533.1791 | 441.7894 | 296.8729 | 327.2839 | 280.3893 |
| 3544  | GEN1      | 2433.941 | -0.68404 | 0.117768 | -5.80837 | 6.31E-09 | 4.73E-08 | 2843.243 | 3376.983 | 2787.1   | 1763.38  | 1796.853 | 2036.088 |
| 3859  | CCNE1     | 1480.709 | -0.68414 | 0.124697 | -5.48637 | 4.10E-08 | 2.83E-07 | 1681.552 | 2094.398 | 1702.455 | 1116.063 | 1105.92  | 1183.866 |
| 16296 | TRNAK-CU  | 57.13447 | -0.68426 | 0.425613 | -1.6077  | 0.107901 | 0.176027 | 74.80792 | 44.34036 | 93.92374 | 44.64254 | 27.80844 | 57.28383 |
| 3163  | LOC119625 | 3872.358 | -0.68435 | 0.110337 | -6.20234 | 5.56E-10 | 4.68E-09 | 4608.276 | 5151.693 | 4571.651 | 2763.373 | 2808.652 | 3330.502 |
| 3717  | LOC103238 | 20626.88 | -0.68443 | 0.121712 | -5.62337 | 1.87E-08 | 1.34E-07 | 23058.73 | 30002    | 23234.64 | 15493.19 | 14736.33 | 17236.4  |
| 5747  | R3HDM2    | 1657.261 | -0.68456 | 0.159179 | -4.30058 | 1.70E-05 | 7.88E-05 | 1744.434 | 2582.689 | 1805.423 | 1138.385 | 1304.858 | 1367.777 |
| 7983  | B3GALT9   | 199.6812 | -0.68459 | 0.200343 | -3.41711 | 0.000633 | 0.002108 | 252.0702 | 250.7146 | 234.4615 | 142.8561 | 173.268  | 144.717  |
| 9693  | PAM16     | 661.1485 | -0.68508 | 0.233603 | -2.93268 | 0.00336  | 0.009217 | 9        |          |          |          |          |          |



|       |           |          |          |          |          |          |          |          |          |          |          |          |          |
|-------|-----------|----------|----------|----------|----------|----------|----------|----------|----------|----------|----------|----------|----------|
| 2942  | LOC103246 | 1715.316 | -0.68545 | 0.105526 | -6.49563 | 8.27E-11 | 7.47E-10 | 2160.756 | 2226.324 | 1961.267 | 1274.545 | 1311.275 | 1357.727 |
| 22916 | TMEM221   | 4.575767 | -0.68548 | 1.18791  | -0.57705 | 0.563908 | 0.654193 | 5.420864 | 4.926706 | 6.261582 | 6.696381 | 2.139111 | 2.009959 |
| 3156  | CIBAR1    | 3817.653 | -0.68569 | 0.110431 | -6.20921 | 5.33E-10 | 4.49E-09 | 4395.236 | 5269.386 | 4453.377 | 3028.996 | 3052.511 | 2706.41  |
| 22389 | LOC119624 | 5.939407 | -0.68586 | 1.039716 | -0.65966 | 0.509474 | 0.604957 | 9.215468 | 5.474118 | 6.957314 | 6.696381 | 4.278221 | 3.014938 |
| 17880 | LOC103247 | 30.14224 | -0.6859  | 0.502783 | -1.36422 | 0.172499 | 0.256482 | 40.65648 | 33.93953 | 36.17803 | 15.62489 | 36.36488 | 18.08963 |
| 16657 | LOC103237 | 36.21247 | -0.68593 | 0.443497 | -1.54665 | 0.121949 | 0.194633 | 39.03022 | 48.17224 | 48.00546 | 20.08914 | 27.80844 | 34.1693  |
| 2801  | NMT1      | 8262.091 | -0.68615 | 0.10254  | -6.69155 | 2.21E-11 | 2.10E-10 | 10049.2  | 11015.02 | 9516.214 | 6104.867 | 5948.867 | 6938.378 |
| 4669  | DNAJB11   | 8528.264 | -0.6863  | 0.139938 | -4.90434 | 9.37E-07 | 5.34E-06 | 9210.047 | 13233.68 | 9115.472 | 6403.972 | 6457.975 | 6748.437 |
| 4094  | RSL1D1    | 7406.245 | -0.68645 | 0.129513 | -5.30025 | 1.16E-07 | 7.51E-07 | 8247.302 | 11145.3  | 8015.521 | 5636.121 | 5572.383 | 5820.841 |
| 14195 | LOC103227 | 94.56974 | -0.68648 | 0.347067 | -1.97794 | 0.047935 | 0.089775 | 145.8212 | 70.61612 | 134.2762 | 58.0353  | 81.28621 | 77.38342 |
| 5012  | LOC103248 | 728.4776 | -0.68677 | 0.146713 | -4.68105 | 2.85E-06 | 1.51E-05 | 855.4123 | 1030.776 | 806.3527 | 549.1032 | 609.6465 | 519.5744 |
| 2787  | NUDT21    | 5263.789 | -0.68714 | 0.102215 | -6.72248 | 1.79E-11 | 1.70E-10 | 6258.929 | 7171.095 | 6056.342 | 3810.241 | 4079.284 | 4206.844 |
| 4079  | MRE11     | 1617.287 | -0.68757 | 0.129377 | -5.31444 | 1.07E-07 | 6.97E-07 | 1875.077 | 2335.259 | 1774.115 | 1252.223 | 1262.075 | 1204.97  |
| 3639  | FAXC      | 870.7463 | -0.68763 | 0.120568 | -5.70326 | 1.18E-08 | 8.59E-08 | 1050.563 | 1154.492 | 1018.551 | 674.1023 | 652.4288 | 674.3412 |
| 20286 | LOC119618 | 14.1166  | -0.68768 | 0.701394 | -0.98044 | 0.326867 | 0.428362 | 15.7205  | 16.42235 | 19.48048 | 8.928508 | 17.11289 | 7.034856 |
| 6772  | GNB5      | 325.4796 | -0.68802 | 0.179774 | -3.82715 | 0.00013  | 0.000509 | 424.4536 | 351.9858 | 432.0492 | 218.7484 | 250.2759 | 275.3644 |
| 24109 | LOC119627 | 2.299463 | -0.68804 | 1.768092 | -0.38914 | 0.69717  | 0.76877  | 3.252518 | 4.379295 | 0.695731 | 4.464254 | 0        | 1.004979 |
| 3138  | SLC35E2B  | 2542.667 | -0.68805 | 0.110334 | -6.23609 | 4.49E-10 | 3.80E-09 | 3292.633 | 3022.808 | 3107.136 | 1890.612 | 1769.045 | 2173.771 |
| 2909  | PRMT1     | 5686.635 | -0.68816 | 0.105287 | -6.53601 | 6.32E-11 | 5.77E-10 | 7468.866 | 6284.288 | 7306.571 | 4308.005 | 4089.98  | 4662.1   |
| 2203  | TRAP1     | 5097.186 | -0.68835 | 0.090602 | -7.59751 | 3.02E-14 | 3.64E-13 | 6372.225 | 6335.744 | 6171.137 | 3903.99  | 3651.462 | 4148.555 |
| 2050  | PGM2      | 4905.52  | -0.68838 | 0.08733  | -7.88252 | 3.21E-15 | 4.16E-14 | 6134.791 | 6091.051 | 5943.633 | 3622.742 | 3679.27  | 3961.629 |
| 3791  | ZBTB14    | 862.6576 | -0.68844 | 0.123974 | -5.55307 | 2.81E-08 | 1.97E-07 | 1051.105 | 1107.414 | 1041.51  | 611.6028 | 641.7332 | 722.5802 |
| 8261  | LOC103249 | 237.8077 | -0.68851 | 0.207044 | -3.32544 | 0.000883 | 0.002841 | 260.7435 | 333.3738 | 290.12   | 154.0168 | 177.5462 | 211.0457 |
| 19472 | ADGRL3    | 22.74529 | -0.68853 | 0.62302  | -1.10514 | 0.269097 | 0.367396 | 28.18849 | 27.918   | 26.43779 | 20.08914 | 27.80844 | 6.029877 |
| 3843  | SYNE2     | 81415.87 | -0.68859 | 0.125155 | -5.50191 | 3.76E-08 | 2.60E-07 | 91245.6  | 121490.9 | 88721.75 | 60314.3  | 60534.69 | 66187.95 |
| 13230 | LOC119628 | 74.15293 | -0.68885 | 0.318419 | -2.16334 | 0.030515 | 0.061318 | 97.57555 | 90.32295 | 84.87923 | 71.42806 | 53.47777 | 47.23404 |
| 2973  | ERCC8     | 1371.595 | -0.68902 | 0.10664  | -6.46115 | 1.04E-10 | 9.29E-10 | 1763.407 | 1630.74  | 1684.366 | 1104.903 | 998.9647 | 1047.189 |
| 2620  | ISY1      | 2248.661 | -0.68911 | 0.099158 | -6.94956 | 3.66E-12 | 3.72E-11 | 2780.903 | 2944.528 | 2602.731 | 1720.97  | 1694.176 | 1748.664 |
| 2596  | ANGEL2    | 1906.009 | -0.6892  | 0.098686 | -6.9838  | 2.87E-12 | 2.94E-11 | 2382.47  | 2414.086 | 2261.127 | 1404.008 | 1525.186 | 1449.18  |
| 2901  | ARSJ      | 4434.144 | -0.68921 | 0.105264 | -6.54744 | 5.85E-11 | 5.36E-10 | 5181.804 | 6154.551 | 5083.709 | 3470.957 | 3322.039 | 3391.806 |
| 23981 | LOC119629 | 2.836324 | -0.68924 | 1.681968 | -0.40978 | 0.681965 | 0.756028 | 8.131296 | 0.547412 | 2.087194 | 2.232127 | 0        | 4.019918 |
| 3006  | TTC7B     | 2459.906 | -0.6893  | 0.107538 | -6.40988 | 1.46E-10 | 1.29E-09 | 2967.381 | 3328.264 | 2818.408 | 1863.826 | 1794.714 | 1986.844 |
| 3442  | XRCC2     | 963.1026 | -0.68982 | 0.116761 | -5.90797 | 3.46E-09 | 2.68E-08 | 1176.87  | 1252.478 | 1134.042 | 752.2268 | 761.5234 | 701.4757 |
| 13739 | CD163L1   | 69.40377 | -0.68991 | 0.334546 | -2.06222 | 0.039187 | 0.075827 | 77.51835 | 81.01695 | 96.70666 | 55.80317 | 64.17332 | 41.20416 |
| 4306  | AK6       | 1539.506 | -0.69016 | 0.133962 | -5.15187 | 2.58E-07 | 1.59E-06 | 1655.532 | 2217.565 | 1825.599 | 1212.045 | 1227.85  | 1098.443 |
| 6787  | THAP11    | 770.9802 | -0.69023 | 0.180576 | -3.82239 | 0.000132 | 0.000518 | 1091.22  | 710.5405 | 1056.12  | 633.9241 | 506.9692 | 627.1072 |
| 7593  | ACVR1C    | 327.7445 | -0.69027 | 0.195637 | -3.5283  | 0.000418 | 0.001464 | 362.1137 | 474.606  | 372.912  | 261.1589 | 286.6408 | 209.0357 |
| 17223 | NACAD     | 34.85411 | -0.69032 | 0.47165  | -1.46363 | 0.143295 | 0.221186 | 33.60935 | 42.69812 | 51.48412 | 29.01765 | 34.22577 | 18.08963 |
| 19533 | LOC119618 | 25.28609 | -0.69043 | 0.630389 | -1.09525 | 0.273407 | 0.372115 | 32.52518 | 20.25424 | 41.74388 | 26.78552 | 4.278221 | 26.12947 |
| 3087  | SGPL1     | 4478.707 | -0.69056 | 0.109707 | -6.2946  | 3.08E-10 | 2.65E-09 | 5684.318 | 5584.148 | 5334.868 | 3212.031 | 3144.493 | 3912.385 |
| 4254  | DIAPH3    | 1354.054 | -0.69125 | 0.133264 | -5.18705 | 2.14E-07 | 1.34E-06 | 1531.394 | 1950.976 | 1538.262 | 982.1359 | 1016.078 | 1105.477 |
| 4837  | IFT27     | 910.2536 | -0.69147 | 0.144322 | -4.79117 | 1.66E-06 | 9.11E-06 | 1124.287 | 1019.281 | 1234.923 | 723.2091 | 583.9772 | 775.8442 |
| 4282  | RPL22     | 13357.16 | -0.69159 | 0.133893 | -5.16522 | 2.40E-07 | 1.49E-06 | 14523.04 | 20447.47 | 14523.39 | 10196.36 | 10592.88 | 9859.854 |
| 8107  | ZSCAN9    | 247.5351 | -0.69198 | 0.204872 | -3.37762 | 0.000731 | 0.002398 | 276.464  | 362.934  | 275.5096 | 191.9629 | 207.4937 | 170.8465 |
| 9271  | MBOAT1    | 148.9646 | -0.692   | 0.227668 | -3.0395  | 0.00237  | 0.006795 | 197.3194 | 172.9821 | 183.6731 | 109.3742 | 104.8164 | 125.6224 |
| 15496 | LOC119625 | 45.58541 | -0.69234 | 0.396748 | -1.74505 | 0.080977 | 0.138924 | 52.58238 | 58.57306 | 56.35424 | 44.64254 | 34.22577 | 27.13445 |
| 5355  | POLR2G    | 2465.952 | -0.69236 | 0.154322 | -4.48644 | 7.24E-06 | 3.60E-05 | 3384.787 | 2270.664 | 3487.006 | 1850.433 | 1813.966 | 1988.854 |
| 14564 | GSDMB     | 52.21857 | -0.69251 | 0.362033 | -1.91284 | 0.055769 | 0.101802 | 72.09749 | 60.76271 | 60.52863 | 37.94616 | 42.78221 | 39.1942  |
| 19336 | LOC103225 | 22.84598 | -0.69289 | 0.613696 | -1.12905 | 0.258877 | 0.355929 | 21.68345 | 39.96106 | 22.2634  | 11.16063 | 29.94755 | 12.05975 |
| 24001 | TRNAM-C4  | 2.253157 | -0.69291 | 1.705509 | -0.40627 | 0.684541 | 0.758181 | 2.168345 | 3.284471 | 2.782925 | 0        | 4.278221 | 1.004979 |
| 16707 | LOC119627 | 33.80832 | -0.6933  | 0.44979  | -1.54138 | 0.123225 | 0.196082 | 47.7036  | 35.03436 | 42.43961 | 29.01765 | 23.53022 | 25.12449 |
| 10842 | MARCKSL1  | 182.4258 | -0.6933  | 0.260428 | -2.66215 | 0.007764 | 0.019039 | 268.8748 | 162.5813 | 246.9846 | 145.0883 | 111.2338 | 159.7917 |
| 3379  | PSME3     | 6603.84  | -0.69355 | 0.11636  | -5.96041 | 2.52E-09 | 1.98E-08 | 7475.913 | 9564.379 | 7445.021 | 4897.287 | 5071.831 | 5168.609 |
| 16210 | FRRS1L    | 40.54081 | -0.69358 | 0.42665  | -1.62564 | 0.104026 | 0.170596 | 43.36691 | 56.93083 | 51.48412 | 22.32127 | 29.94755 | 39.1942  |
| 4243  | SH3D19    | 5093.856 | -0.69376 | 0.133609 | -5.19243 | 2.08E-07 | 1.30E-06 | 5504.887 | 7736.024 | 5645.86  | 3941.936 | 3796.921 | 3937.51  |
| 12628 | LOC103244 | 87.2346  | -0.69381 | 0.304877 | -2.27571 | 0.022864 | 0.048133 | 92.15468 | 123.7151 | 109.2298 | 51.33892 | 70.59065 | 76.37844 |
| 3660  | LOC119615 | 1399.957 | -0.69382 | 0.121994 | -5.68735 | 1.29E-08 | 9.37E-08 | 1658.242 | 1883.644 | 1654.449 | 1082.582 | 954.0434 | 1166.781 |
| 22928 | CRYBA4    | 6.762146 | -0.69383 | 1.206217 | -0.57521 | 0.565151 | 0.655292 | 7.589209 | 6.568942 | 10.43597 | 0        | 14.97377 | 1.004979 |
| 3236  | KPNB1     | 29121.08 | -0.69394 | 0.113243 | -6.12789 | 8.90E-10 | 7.32E-09 | 34062.54 | 41936.67 | 31982.08 | 21832.43 | 21626.41 | 23286.38 |
| 16723 | LOC119627 | 36.34239 | -0.69421 | 0.451339 | -1.53811 | 0.124022 | 0.197161 | 45.53526 | 41.05589 | 46.614   | 37.94616 | 27.80844 | 19.09461 |
| 3883  | TFAP2C    | 979.4234 | -0.69422 | 0.127126 | -5.46083 | 4.74E-08 | 3.24E-07 | 1160.607 | 1354.844 | 1116.649 | 770.0838 | 716.6021 | 757.7545 |
| 7734  | LOC103237 | 234.4674 | -0.69464 | 0.19952  | -3.48156 | 0.000499 | 0.001714 | 308.9892 | 299.9817 | 264.3779 | 160.7131 | 164.7115 | 208.0308 |
| 21905 | LOC119625 | 10.03127 | -0.69497 | 0.934636 | -0.74357 | 0.457137 | 0.554804 | 11.38381 | 13.13788 | 12.52316 | 0        | 17.11289 | 6.029877 |
| 22053 | LOC103245 | 7.054254 | -0.69502 | 0.970765 | -0.71595 | 0.474021 | 0.571435 | 10.84173 | 6.568942 | 9.044508 | 6.696381 | 2.139111 | 7.034856 |
| 6968  | RAB39A    | 296.6516 | -0.69543 | 0.185514 | -3.74867 | 0.000178 | 0.000678 | 332.2989 | 424.2442 | 341.6041 | 232.1412 | 239.5804 | 210.0407 |
| 3172  | EPN1      | 3165.932 | -0.69547 | 0.112286 | -6.1938  | 5.87E-10 | 4.92E-09 | 3968.614 | 3659.448 | 4125.687 | 2334.805 | 2192.588 | 2714.45  |
| 2799  | SAMD4A    | 4415.947 | -0.69572 | 0.103901 | -6.69597 | 2.14E-11 | 2.03E-10 | 5277.211 | 5968.431 | 5142.846 | 3270.066 | 3200.11  | 3637.021 |
| 14506 | LOC119626 | 52.62932 | -0.69592 | 0.361915 | -1.92289 | 0.054494 | 0.09987  | 60.17159 | 66.23683 | 68.18167 | 37.94616 | 47.06043 | 36.17926 |
| 2189  | ACBD6     | 2638.975 | -0.69629 | 0.091309 | -7.62559 | 2.43E-14 | 2.95E-13 | 3384.245 | 3217.687 | 3191.32  | 1977.665 | 2010.764 | 2052.168 |
| 4523  | MRPS11    | 2712.502 | -0.69653 | 0.139279 | -5.00095 | 5.70E-07 | 3.35E-06 | 3590.78  | 2659.874 | 3811.216 | 2176.324 | 2094.189 | 1942.625 |
| 4291  | ZGRF1     | 630.2014 | -0.69691 | 0.135037 | -5.16087 | 2.46E-07 | 1        |          |          |          |          |          |          |



|       |           |          |          |          |          |          |          |          |          |          |          |          |          |
|-------|-----------|----------|----------|----------|----------|----------|----------|----------|----------|----------|----------|----------|----------|
| 24795 | LOC119621 | 1.045137 | -0.6973  | 2.474564 | -0.28179 | 0.778108 | 0.834281 | 1.626259 | 0.547412 | 2.087194 | 0        | 0        | 2.009959 |
| 3601  | AURKB     | 1600.137 | -0.69763 | 0.12154  | -5.7399  | 9.47E-09 | 6.99E-08 | 2070.228 | 1790.037 | 2086.498 | 1151.778 | 1146.563 | 1355.717 |
| 2935  | NUP42     | 1349.116 | -0.69781 | 0.107289 | -6.50405 | 7.82E-11 | 7.08E-10 | 1724.919 | 1719.968 | 1564.004 | 1006.689 | 1028.912 | 1050.204 |
| 9776  | LOC103224 | 135.8925 | -0.6981  | 0.23992  | -2.90972 | 0.003618 | 0.009838 | 153.9525 | 179.0037 | 172.5414 | 111.6063 | 87.70354 | 110.5477 |
| 3475  | TASOR     | 6899.728 | -0.69814 | 0.11865  | -5.88406 | 4.00E-09 | 3.06E-08 | 7815.259 | 10070.74 | 7726.097 | 5392.819 | 5076.11  | 5317.346 |
| 9121  | GNF7      | 166.5434 | -0.69824 | 0.226914 | -3.07711 | 0.00209  | 0.006092 | 199.4878 | 212.3958 | 205.9365 | 102.6778 | 156.1551 | 122.6075 |
| 6708  | TAF15     | 2142.857 | -0.69868 | 0.181366 | -3.85232 | 0.000117 | 0.000464 | 2156.962 | 3600.328 | 2201.294 | 1491.061 | 1591.498 | 1815.998 |
| 4399  | ADK       | 603.1697 | -0.6989  | 0.137519 | -5.08219 | 3.73E-07 | 2.25E-06 | 749.7054 | 681.5277 | 807.7441 | 475.443  | 451.3524 | 453.2457 |
| 2747  | LAMA4     | 32293.97 | -0.69899 | 0.10314  | -6.7771  | 1.23E-11 | 1.19E-10 | 37886.42 | 44377.03 | 37646.72 | 24305.63 | 22929.13 | 26618.89 |
| 5189  | DDX10     | 2925.881 | -0.69914 | 0.152501 | -4.5845  | 4.55E-06 | 2.33E-05 | 3104.529 | 4642.6   | 3117.572 | 2167.395 | 2226.814 | 2296.378 |
| 18104 | LOC103241 | 28.48995 | -0.6993  | 0.52981  | -1.3199  | 0.186868 | 0.274414 | 33.60935 | 43.79295 | 27.82925 | 13.39276 | 34.22577 | 18.08963 |
| 2121  | SLC7A11   | 20102.59 | -0.69972 | 0.090267 | -7.75163 | 9.07E-15 | 1.14E-13 | 24195.48 | 26962.22 | 23499.02 | 14930.7  | 15136.35 | 15891.74 |
| 3657  | FBX034    | 1906.889 | -0.69974 | 0.122947 | -5.69141 | 1.26E-08 | 9.16E-08 | 2309.288 | 2595.279 | 2181.118 | 1524.543 | 1266.354 | 1564.753 |
| 14805 | LOC103241 | 65.19355 | -0.69975 | 0.373824 | -1.87186 | 0.061225 | 0.109941 | 68.84497 | 74.44801 | 98.79385 | 31.24978 | 70.59065 | 47.23404 |
| 3131  | HUS1      | 1653.767 | -0.69977 | 0.112098 | -6.24251 | 4.31E-10 | 3.66E-09 | 2088.117 | 2026.519 | 2035.71  | 1212.045 | 1157.259 | 1402.951 |
| 19088 | LOC119621 | 21.83846 | -0.69981 | 0.597368 | -1.17149 | 0.241401 | 0.336213 | 24.39389 | 29.56024 | 26.43779 | 29.01765 | 8.556443 | 13.06473 |
| 22548 | LOC119621 | 5.619257 | -0.70002 | 1.107467 | -0.63209 | 0.527329 | 0.621742 | 11.9259  | 4.379295 | 4.87012  | 2.232127 | 4.278221 | 6.029877 |
| 9452  | FCGRT     | 175.2084 | -0.70028 | 0.233634 | -2.99734 | 0.002723 | 0.00766  | 240.1443 | 182.8355 | 230.9828 | 124.9991 | 115.512  | 156.7768 |
| 4708  | AK8       | 596.7928 | -0.7003  | 0.143506 | -4.87996 | 1.06E-06 | 5.99E-06 | 813.1296 | 672.7691 | 733.9966 | 424.1041 | 451.3524 | 485.4051 |
| 20588 | CD302     | 14.00715 | -0.7006  | 0.746055 | -0.93907 | 0.347694 | 0.448972 | 9.757555 | 21.34906 | 21.56767 | 4.464254 | 12.83466 | 14.06971 |
| 15313 | LOC119621 | 45.81253 | -0.70098 | 0.394414 | -1.77727 | 0.075524 | 0.131118 | 58.54533 | 59.66789 | 50.78839 | 44.64254 | 32.08666 | 29.1444  |
| 10008 | LOC119621 | 123.1792 | -0.70121 | 0.245234 | -2.85935 | 0.004245 | 0.011277 | 166.4205 | 149.4434 | 141.9292 | 98.21359 | 87.70354 | 95.47305 |
| 3529  | LOC103221 | 2275.749 | -0.7026  | 0.120594 | -5.82616 | 5.67E-09 | 4.27E-08 | 3046.525 | 2520.831 | 2898.417 | 1598.203 | 1659.95  | 1930.566 |
| 24611 | SLC2A9    | 1.45807  | -0.70262 | 2.233306 | -0.31461 | 0.753057 | 0.813458 | 3.794605 | 0.547412 | 1.391463 | 0        | 0        | 3.014938 |
| 16784 | LOC103241 | 44.32073 | -0.70265 | 0.459732 | -1.52839 | 0.126416 | 0.200237 | 66.67662 | 33.39212 | 66.09448 | 22.32127 | 34.22577 | 43.21412 |
| 2483  | FOXMI     | 2985.802 | -0.70272 | 0.098257 | -7.15181 | 8.56E-13 | 9.17E-12 | 3656.373 | 3888.266 | 3558.666 | 2238.823 | 2147.667 | 2425.015 |
| 3538  | MTR       | 6867.223 | -0.70285 | 0.120834 | -5.8167  | 6.00E-09 | 4.51E-08 | 7693.29  | 10041.17 | 7792.191 | 5153.981 | 4986.267 | 5536.432 |
| 2872  | QDPR      | 2051.385 | -0.70292 | 0.10675  | -6.5847  | 4.56E-11 | 4.22E-10 | 2682.785 | 2309.53  | 2634.735 | 1573.65  | 1501.656 | 1605.957 |
| 2581  | SLC30A6   | 2083.28  | -0.70294 | 0.100274 | -7.01018 | 2.38E-12 | 2.45E-11 | 2695.253 | 2634.693 | 2415.579 | 1542.4   | 1578.664 | 1633.092 |
| 3659  | ORC1      | 1173.478 | -0.70312 | 0.123623 | -5.68757 | 1.29E-08 | 9.36E-08 | 1441.408 | 1544.796 | 1383.114 | 816.9585 | 855.6443 | 998.9496 |
| 13117 | LOC119621 | 71.28268 | -0.70312 | 0.321796 | -2.185   | 0.028889 | 0.058551 | 93.78094 | 84.30142 | 86.27069 | 44.64254 | 68.45154 | 50.24897 |
| 2636  | PMS1      | 1953.649 | -0.70356 | 0.101666 | -6.92035 | 4.51E-12 | 4.54E-11 | 2469.203 | 2510.978 | 2285.478 | 1497.757 | 1411.813 | 1546.663 |
| 3327  | ETAA1     | 3002.329 | -0.70424 | 0.117001 | -6.01907 | 1.75E-09 | 1.40E-08 | 3377.74  | 4270.907 | 3509.965 | 2357.126 | 2329.492 | 2168.746 |
| 19310 | LOC119621 | 18.15266 | -0.70427 | 0.621902 | -1.13245 | 0.257447 | 0.354432 | 25.47806 | 14.78012 | 27.13352 | 15.62489 | 12.83466 | 13.06473 |
| 21057 | LOC119621 | 13.27665 | -0.70437 | 0.807774 | -0.87199 | 0.383213 | 0.483794 | 22.22554 | 12.59047 | 16.00182 | 4.464254 | 4.278221 | 20.09959 |
| 2431  | FIGNL1    | 1845.634 | -0.70442 | 0.097502 | -7.22466 | 5.02E-13 | 5.49E-12 | 2309.288 | 2342.375 | 2211.73  | 1354.901 | 1437.482 | 1418.026 |
| 6070  | LOC103221 | 594.5124 | -0.70482 | 0.170396 | -4.13638 | 3.53E-05 | 0.000155 | 607.6788 | 788.8204 | 809.1356 | 482.1394 | 498.4128 | 380.8872 |
| 5560  | ZFP36L2   | 569.8583 | -0.70508 | 0.160635 | -4.38932 | 1.14E-05 | 5.44E-05 | 648.8774 | 819.4755 | 653.9875 | 374.9973 | 453.4915 | 468.3204 |
| 3407  | MELK      | 1969.15  | -0.70525 | 0.118772 | -5.93782 | 2.89E-09 | 2.25E-08 | 2288.689 | 2732.68  | 2297.305 | 1464.275 | 1630.002 | 1401.946 |
| 5361  | KCTD1     | 882.9112 | -0.70546 | 0.157331 | -4.48394 | 7.33E-06 | 3.63E-05 | 982.8026 | 1344.991 | 954.5434 | 707.5843 | 650.2896 | 657.2566 |
| 9714  | LOC103241 | 152.1431 | -0.7057  | 0.241194 | -2.92588 | 0.003435 | 0.0094   | 177.8043 | 226.0811 | 161.4097 | 122.767  | 111.2338 | 113.5627 |
| 2714  | HCF1      | 4119.67  | -0.70571 | 0.103479 | -6.81989 | 9.11E-12 | 8.92E-11 | 4770.902 | 5454.411 | 5105.973 | 3035.693 | 2939.138 | 3411.905 |
| 5127  | LOC103221 | 567.0454 | -0.70587 | 0.152913 | -4.61616 | 3.91E-06 | 2.03E-05 | 599.5475 | 783.8937 | 727.0393 | 419.6399 | 429.9612 | 442.191  |
| 3898  | ZNF689    | 767.1953 | -0.706   | 0.129632 | -5.44621 | 5.15E-08 | 3.51E-07 | 910.163  | 1007.785 | 941.3245 | 560.2639 | 545.4732 | 638.162  |
| 15862 | LOC103231 | 39.8     | -0.70676 | 0.418426 | -1.68909 | 0.091202 | 0.152859 | 46.61943 | 53.64636 | 46.614   | 35.71403 | 32.08666 | 24.11951 |
| 8513  | CD83      | 163.9048 | -0.707   | 0.217326 | -3.25321 | 0.001141 | 0.003564 | 211.9558 | 184.4778 | 213.5895 | 118.3027 | 130.4858 | 124.6175 |
| 18170 | LOC103241 | 24.13004 | -0.70709 | 0.540252 | -1.30882 | 0.190596 | 0.278866 | 32.52518 | 35.58177 | 21.56767 | 15.62489 | 21.39111 | 18.08963 |
| 12787 | LOC103231 | 176.5062 | -0.7071  | 0.315416 | -2.2418  | 0.024975 | 0.051924 | 268.8748 | 118.241  | 268.5523 | 160.7131 | 124.0684 | 118.5876 |
| 6334  | CLBA1     | 311.3549 | -0.70711 | 0.176279 | -4.01131 | 6.04E-05 | 0.000253 | 419.5748 | 372.7874 | 368.7376 | 245.534  | 203.2155 | 258.2797 |
| 4038  | E2F7      | 1772.579 | -0.70718 | 0.132307 | -5.345   | 9.04E-08 | 5.95E-07 | 1987.289 | 2605.133 | 2005.098 | 1352.669 | 1281.327 | 1403.956 |
| 6210  | LOC103231 | 523.3692 | -0.70753 | 0.173879 | -4.06913 | 4.72E-05 | 0.000202 | 703.086  | 620.765  | 631.7241 | 341.5154 | 348.675  | 494.4499 |
| 19424 | LOC103211 | 22.95841 | -0.70775 | 0.634972 | -1.11462 | 0.265013 | 0.362715 | 41.74065 | 12.59047 | 31.30791 | 22.32127 | 10.69555 | 19.09461 |
| 9021  | KCTD13    | 200.4088 | -0.70784 | 0.227614 | -3.10981 | 0.001872 | 0.005517 | 242.8547 | 277.5378 | 225.417  | 187.4987 | 113.3729 | 155.7718 |
| 4581  | LOC103231 | 547.3891 | -0.70796 | 0.142968 | -4.95189 | 7.35E-07 | 4.27E-06 | 662.9716 | 739.0059 | 635.2027 | 386.158  | 444.935  | 416.0615 |
| 7553  | LOC119621 | 295.4722 | -0.70801 | 0.199953 | -3.54088 | 0.000399 | 0.001403 | 314.9522 | 418.2226 | 365.259  | 270.0874 | 188.2417 | 216.0706 |
| 17931 | LOC119621 | 29.6116  | -0.70838 | 0.522918 | -1.35467 | 0.175524 | 0.260237 | 46.07734 | 25.18094 | 39.65669 | 26.78552 | 12.83466 | 27.13445 |
| 24086 | LOC119621 | 1.882552 | -0.70851 | 1.804673 | -0.3926  | 0.694616 | 0.766685 | 1.626259 | 2.737059 | 2.782925 | 0        | 2.139111 | 2.009959 |
| 2619  | QRS11     | 1518.586 | -0.70876 | 0.101912 | -6.95463 | 3.53E-12 | 3.59E-11 | 1873.45  | 1880.907 | 1897.259 | 1218.741 | 1099.503 | 1141.657 |
| 12282 | LOC119621 | 93.93671 | -0.7088  | 0.301764 | -2.34886 | 0.018831 | 0.04076  | 127.3903 | 108.935  | 110.6213 | 71.42806 | 91.98176 | 53.26391 |
| 8908  | LOC103231 | 147.4202 | -0.70893 | 0.225569 | -3.14287 | 0.001673 | 0.004993 | 185.9356 | 182.8355 | 178.1072 | 122.767  | 113.3729 | 101.5029 |
| 4931  | SERPINB9  | 1293.17  | -0.70894 | 0.150039 | -4.72506 | 2.30E-06 | 1.24E-05 | 1446.286 | 1973.967 | 1395.637 | 973.2074 | 934.7914 | 1035.129 |
| 7040  | LOC103211 | 210.5607 | -0.70901 | 0.190771 | -3.71655 | 0.000202 | 0.000763 | 267.7907 | 258.3784 | 256.7249 | 167.4095 | 158.2942 | 154.7668 |
| 4069  | DDX42     | 4897.012 | -0.70911 | 0.133309 | -5.31926 | 1.04E-07 | 6.81E-07 | 5636.072 | 7318.896 | 5279.905 | 3421.851 | 3696.383 | 4028.963 |
| 1921  | TOMM40    | 4235.816 | -0.70914 | 0.087026 | -8.14858 | 3.68E-16 | 5.10E-15 | 5376.413 | 5273.765 | 5120.583 | 3294.619 | 3080.319 | 3269.198 |
| 22377 | LOC119621 | 5.65374  | -0.70915 | 1.071655 | -0.66174 | 0.508141 | 0.603697 | 5.96295  | 9.853413 | 5.565851 | 2.232127 | 4.278221 | 6.029877 |
| 25024 | TRNAM-CA  | 0.88508  | -0.70934 | 2.941088 | -0.24118 | 0.809413 | 0.859869 | 1.084173 | 0        | 2.087194 | 0        | 2.139111 | 0        |
| 7641  | LOC103231 | 219.7601 | -0.70946 | 0.202031 | -3.51164 | 0.000445 | 0.001549 | 246.6493 | 294.5076 | 278.9883 | 176.338  | 141.1813 | 180.8963 |
| 20734 | LOC119621 | 11.71162 | -0.7096  | 0.777173 | -0.91305 | 0.361218 | 0.463151 | 17.34676 | 8.211177 | 18.08902 | 11.16063 | 6.417332 | 9.044815 |
| 3882  | FRMD4B    | 2118.818 | -0.70996 | 0.129913 | -5.46491 | 4.63E-08 | 3.17E-07 | 2406.321 | 3099.993 | 2381.488 | 1720.97  | 1527.325 | 1576.813 |
| 8217  | CCDC85B   | 204.704  | -0.71018 | 0.212533 | -3.34151 | 0.000833 | 0.002696 | 259.1173 | 212.9432 | 289.4243 | 160.7131 | 158.2942 | 147.732  |
| 4292  | MID1      | 1261.    |          |          |          |          |          |          |          |          |          |          |          |



|       |           |          |          |          |          |          |          |          |          |          |          |          |          |
|-------|-----------|----------|----------|----------|----------|----------|----------|----------|----------|----------|----------|----------|----------|
| 2833  | NIP7      | 1774.77  | -0.71121 | 0.107062 | -6.64302 | 3.07E-11 | 2.88E-10 | 2370.002 | 2068.669 | 2168.595 | 1339.276 | 1409.674 | 1292.404 |
| 20442 | LOC103232 | 12.64196 | -0.71133 | 0.74436  | -0.95563 | 0.33926  | 0.44121  | 9.757555 | 20.25424 | 17.39328 | 6.696381 | 10.69555 | 11.05477 |
| 2219  | DNAJA3    | 5524.692 | -0.71142 | 0.09404  | -7.56509 | 3.88E-14 | 4.64E-13 | 6796.137 | 7095.005 | 6695.023 | 4267.827 | 3846.121 | 4448.039 |
| 13347 | LOC11962  | 80.11109 | -0.71144 | 0.332789 | -2.13782 | 0.032531 | 0.064797 | 121.9694 | 71.16354 | 104.3597 | 64.73168 | 64.17332 | 54.26889 |
| 2625  | NCBP1     | 5823.762 | -0.71177 | 0.102571 | -6.93928 | 3.94E-12 | 3.99E-11 | 7384.843 | 7373.09  | 6948.965 | 4178.542 | 4115.649 | 4941.484 |
| 4548  | RPL11     | 28870.37 | -0.71207 | 0.143094 | -4.97627 | 6.48E-07 | 3.79E-06 | 30793.22 | 45509.08 | 31255.73 | 22785.55 | 22490.61 | 20388.02 |
| 2700  | LOC103232 | 1737.275 | -0.71214 | 0.104251 | -6.831   | 8.43E-12 | 8.30E-11 | 2229.601 | 2006.812 | 2233.298 | 1339.276 | 1343.361 | 1271.299 |
| 13417 | LOC10324  | 70.71826 | -0.71239 | 0.335503 | -2.12336 | 0.033723 | 0.066821 | 86.19173 | 105.6505 | 72.35606 | 58.0353  | 42.78221 | 59.29379 |
| 5148  | HYLS1     | 505.5817 | -0.7125  | 0.154776 | -4.60342 | 4.16E-06 | 2.15E-05 | 582.7428 | 708.8983 | 588.5887 | 395.0865 | 406.431  | 351.7428 |
| 21849 | TRNAL-AA  | 10.0431  | -0.71271 | 0.9467   | -0.75283 | 0.451551 | 0.54943  | 10.84173 | 10.94824 | 16.69755 | 6.696381 | 0        | 15.07469 |
| 3446  | ATIC      | 2566.586 | -0.71277 | 0.120715 | -5.90452 | 3.54E-09 | 2.73E-08 | 2856.795 | 3445.957 | 3269.937 | 1765.612 | 1882.417 | 2178.795 |
| 22525 | LOC103225 | 7.447388 | -0.71291 | 1.119623 | -0.63674 | 0.524295 | 0.618796 | 13.55216 | 1.094824 | 13.2189  | 2.232127 | 8.556443 | 6.029877 |
| 2319  | CNOT9     | 3888.156 | -0.71293 | 0.09654  | -7.38481 | 1.53E-13 | 1.75E-12 | 4925.939 | 5016.482 | 4553.562 | 2886.14  | 2802.235 | 3144.581 |
| 12933 | LOC11962  | 100.758  | -0.71303 | 0.321797 | -2.21577 | 0.026707 | 0.054899 | 100.8281 | 159.8442 | 112.7085 | 69.19594 | 102.6773 | 59.29379 |
| 2560  | VARS1     | 6368.544 | -0.71312 | 0.10141  | -7.03205 | 2.04E-12 | 2.11E-11 | 7886.815 | 7969.769 | 7888.898 | 4622.735 | 4432.237 | 5410.809 |
| 2525  | DPF2      | 2313.487 | -0.71333 | 0.100603 | -7.09054 | 1.34E-12 | 1.41E-11 | 2843.243 | 2972.446 | 2813.538 | 1727.666 | 1640.698 | 1883.332 |
| 19207 | LOC103225 | 16.9021  | -0.71345 | 0.619371 | -1.15189 | 0.249364 | 0.34515  | 21.68345 | 18.612   | 22.95914 | 13.39276 | 10.69555 | 14.06971 |
| 2308  | PTPMT1    | 1878.25  | -0.71384 | 0.096394 | -7.40542 | 1.31E-13 | 1.51E-12 | 2325.008 | 2357.155 | 2321.656 | 1441.954 | 1360.474 | 1463.25  |
| 12398 | CFAP61    | 92.57764 | -0.71385 | 0.307463 | -2.32174 | 0.020247 | 0.043415 | 112.754  | 137.9478 | 93.92374 | 55.80317 | 87.70354 | 67.33362 |
| 2370  | TAF1D     | 7687.7   | -0.71397 | 0.097637 | -7.31248 | 2.62E-13 | 2.94E-12 | 9046.879 | 10485.67 | 9121.038 | 5662.906 | 6128.552 | 5681.149 |
| 3411  | BLM       | 2644.996 | -0.71407 | 0.120304 | -5.93559 | 2.93E-09 | 2.28E-08 | 3027.552 | 3817.65  | 3014.604 | 2055.789 | 1927.339 | 2027.044 |
| 25009 | LOC119618 | 0.902357 | -0.71412 | 2.925043 | -0.24414 | 0.807123 | 0.857985 | 0        | 1.094824 | 2.087194 | 2.232127 | 0        | 0        |
| 4758  | DDX46     | 3742.787 | -0.71416 | 0.147602 | -4.83845 | 1.31E-06 | 7.31E-06 | 4080.826 | 5872.087 | 4001.847 | 2656.231 | 2825.765 | 3019.963 |
| 2648  | CBX1      | 4669.696 | -0.71424 | 0.103482 | -6.9021  | 5.12E-12 | 5.14E-11 | 5566.143 | 6460.007 | 5384.265 | 3540.153 | 3405.464 | 3662.145 |
| 5071  | FXN       | 545.0705 | -0.71427 | 0.153683 | -4.64772 | 3.36E-06 | 1.76E-05 | 635.3252 | 777.8722 | 619.2009 | 433.0326 | 382.9008 | 422.0914 |
| 21056 | LOC11962  | 11.62227 | -0.71438 | 0.819166 | -0.87208 | 0.383165 | 0.483779 | 16.26259 | 15.87494 | 10.43597 | 17.85702 | 4.278221 | 5.024897 |
| 2777  | HPS4      | 2225.365 | -0.71443 | 0.106102 | -6.73341 | 1.66E-11 | 1.59E-10 | 2967.381 | 2633.051 | 2702.221 | 1587.042 | 1653.533 | 1808.963 |
| 2969  | FBF1      | 2926.941 | -0.71471 | 0.110513 | -6.46717 | 9.99E-11 | 8.94E-10 | 3949.641 | 3304.725 | 3665.113 | 2093.735 | 2145.528 | 2402.906 |
| 12948 | CSTL1     | 86.34576 | -0.7148  | 0.32287  | -2.2139  | 0.026836 | 0.0551   | 116.0065 | 87.58589 | 116.1871 | 89.28508 | 57.75599 | 51.25395 |
| 2920  | LUZP6     | 5235.573 | -0.71507 | 0.109586 | -6.5252  | 6.79E-11 | 6.18E-10 | 6733.797 | 6210.934 | 6587.88  | 3506.671 | 3906.016 | 4468.139 |
| 12851 | GEMIN7    | 114.7457 | -0.71508 | 0.320884 | -2.22847 | 0.025849 | 0.053475 | 172.9256 | 89.77554 | 164.8883 | 73.66019 | 104.8164 | 82.40832 |
| 4507  | GPR75     | 1080.04  | -0.71509 | 0.142782 | -5.00825 | 5.49E-07 | 3.24E-06 | 1201.805 | 1601.18  | 1225.183 | 828.1191 | 780.7754 | 843.1778 |
| 13190 | LOC10324  | 72.67978 | -0.71517 | 0.32941  | -2.17106 | 0.029927 | 0.060317 | 106.2489 | 78.27989 | 84.87923 | 66.96381 | 53.47777 | 46.22906 |
| 4064  | NEMP2     | 754.9833 | -0.7154  | 0.134413 | -5.32237 | 1.02E-07 | 0.70E-07 | 1035.973 | 864.9107 | 916.9739 | 529.0141 | 586.1163 | 596.9578 |
| 4923  | UQCC2     | 3334.265 | -0.7154  | 0.151161 | -4.7327  | 2.22E-06 | 1.20E-05 | 4495.522 | 3102.73  | 4833.246 | 2598.196 | 2584.046 | 2391.851 |
| 4586  | ROCK2     | 8137.174 | -0.71541 | 0.144498 | -4.95097 | 7.38E-07 | 4.28E-06 | 8961.23  | 12839.54 | 8542.885 | 5859.333 | 6333.907 | 6286.147 |
| 24384 | LOC11962  | 1.786347 | -0.71541 | 2.048577 | -0.34922 | 0.726923 | 0.792541 | 2.710432 | 1.642235 | 2.087194 | 0        | 4.278221 | 0        |
| 4286  | FANCL     | 628.2634 | -0.71554 | 0.138566 | -5.1639  | 2.42E-07 | 1.50E-06 | 817.4662 | 708.3509 | 814.0057 | 475.443  | 509.1083 | 445.2059 |
| 12456 | LOC103238 | 75.33655 | -0.71561 | 0.309886 | -2.30926 | 0.020929 | 0.044665 | 91.6126  | 99.08154 | 89.05362 | 53.57105 | 68.45154 | 50.24897 |
| 20513 | LOC10324  | 11.74788 | -0.71569 | 0.758104 | -0.94405 | 0.345145 | 0.447311 | 10.29964 | 14.78012 | 18.78475 | 11.16063 | 6.417332 | 9.044815 |
| 11214 | LOC11962  | 91.09754 | -0.71573 | 0.277577 | -2.57847 | 0.009924 | 0.023526 | 118.1748 | 105.1031 | 116.1871 | 69.19594 | 70.59065 | 67.33362 |
| 22416 | PLAAT1    | 5.695524 | -0.71601 | 1.094649 | -0.6541  | 0.51305  | 0.608469 | 4.878777 | 4.926706 | 11.82743 | 2.232127 | 4.278221 | 6.029877 |
| 24416 | TRNAG-GC  | 1.390135 | -0.71602 | 2.081327 | -0.34402 | 0.730831 | 0.795754 | 2.710432 | 1.094824 | 1.391463 | 0        | 2.139111 | 1.004979 |
| 2915  | NEMP1     | 2659.25  | -0.71607 | 0.10967  | -6.52932 | 6.61E-11 | 6.03E-10 | 3253.602 | 3662.732 | 3004.864 | 1988.825 | 1938.034 | 2107.442 |
| 15106 | TRNAG-GC  | 168.7695 | -0.71616 | 0.395054 | -1.81281 | 0.069861 | 0.122948 | 260.2015 | 75.54283 | 294.9901 | 129.4634 | 102.6773 | 149.7419 |
| 3051  | FAN1      | 1450.788 | -0.7162  | 0.113014 | -6.33721 | 2.34E-10 | 2.04E-09 | 1925.491 | 1755.55  | 1734.458 | 1116.063 | 1005.382 | 1167.786 |
| 4148  | IFI16     | 6149.173 | -0.71634 | 0.136203 | -5.25939 | 1.45E-07 | 9.26E-07 | 6688.262 | 9500.879 | 6745.811 | 4674.074 | 4644.009 | 4642     |
| 2577  | FKBP4     | 5993.483 | -0.71638 | 0.102141 | -7.0137  | 2.32E-12 | 2.39E-11 | 7704.674 | 7332.581 | 7328.139 | 4462.022 | 4098.536 | 5034.947 |
| 1974  | CLDND1    | 5370.838 | -0.71679 | 0.089167 | -8.03869 | 9.08E-16 | 1.22E-14 | 6369.515 | 6969.647 | 6690.849 | 4066.935 | 4224.744 | 3903.34  |
| 22711 | LOC103235 | 5.562646 | -0.71679 | 1.180641 | -0.60712 | 0.54377  | 0.636525 | 3.794605 | 6.568942 | 10.43597 | 0        | 8.556443 | 4.019918 |
| 24368 | LOC10324  | 1.787235 | -0.71735 | 2.041917 | -0.35131 | 0.725354 | 0.791346 | 2.168345 | 2.189647 | 2.087194 | 0        | 4.278221 | 0        |
| 20400 | TRNAK-CU  | 12.65967 | -0.71764 | 0.746494 | -0.96134 | 0.33638  | 0.438365 | 10.29964 | 20.80165 | 16.00182 | 13.39276 | 6.417332 | 9.044815 |
| 21167 | LOC11962  | 10.7911  | -0.71766 | 0.838993 | -0.85538 | 0.392339 | 0.492764 | 18.97302 | 5.474118 | 16.00182 | 6.696381 | 8.556443 | 9.044815 |
| 8076  | EMX2      | 1044.608 | -0.7177  | 0.211696 | -3.39024 | 0.000698 | 0.002299 | 983.8868 | 1867.769 | 1045.684 | 729.9055 | 853.5052 | 786.8989 |
| 4644  | SEYB      | 1564.414 | -0.7179  | 0.145873 | -4.92139 | 8.59E-07 | 4.92E-06 | 1695.646 | 2350.586 | 1787.334 | 1162.938 | 1300.579 | 1089.398 |
| 4075  | SNP1      | 1709.267 | -0.71824 | 0.135097 | -5.31646 | 1.06E-07 | 6.90E-07 | 1955.306 | 2515.905 | 1911.174 | 1261.152 | 1217.154 | 1394.912 |
| 3546  | SARS2     | 806.1524 | -0.71832 | 0.123686 | -5.80761 | 6.34E-09 | 4.75E-08 | 1032.675 | 949.7595 | 1029.682 | 611.6028 | 569.0034 | 644.1918 |
| 2758  | TRDMT1    | 1254.167 | -0.71866 | 0.106288 | -6.76149 | 1.37E-11 | 1.32E-10 | 1578.013 | 1554.102 | 1549.394 | 895.0829 | 994.6865 | 953.7255 |
| 2804  | MINPP1    | 1322.861 | -0.71895 | 0.107505 | -6.68762 | 2.27E-11 | 2.15E-10 | 1723.293 | 1637.856 | 1578.614 | 1013.386 | 951.9042 | 1032.114 |
| 21100 | LOC10323  | 9.518684 | -0.71905 | 0.831198 | -0.86508 | 0.386995 | 0.487596 | 12.46799 | 10.40082 | 13.2189  | 6.696381 | 4.278221 | 10.04979 |
| 2330  | PRMT3     | 2119.942 | -0.71924 | 0.097629 | -7.36707 | 1.74E-13 | 1.99E-12 | 2529.375 | 2748.555 | 2633.343 | 1566.953 | 1670.645 | 1570.783 |
| 15402 | LOC103218 | 65.99784 | -0.71959 | 0.408999 | -1.7594  | 0.07851  | 0.135514 | 115.4644 | 44.34036 | 86.27069 | 51.33892 | 51.33866 | 47.23404 |
| 3676  | NIFK      | 2265.909 | -0.71962 | 0.126843 | -5.67329 | 1.40E-08 | 1.01E-07 | 2600.388 | 3316.768 | 2539.42  | 1680.792 | 1796.853 | 1661.231 |
| 6406  | RBMS3     | 539.1293 | -0.71975 | 0.181021 | -3.97605 | 7.01E-05 | 0.000291 | 591.4162 | 846.8461 | 572.5869 | 428.5684 | 406.431  | 388.9271 |
| 24405 | LOC119628 | 1.392797 | -0.71992 | 2.080797 | -0.34598 | 0.729356 | 0.794501 | 1.084173 | 2.737059 | 1.391463 | 0        | 2.139111 | 1.004979 |
| 9548  | LOC11962  | 138.5373 | -0.72002 | 0.24221  | -2.9727  | 0.002952 | 0.008219 | 190.2723 | 156.5598 | 171.1499 | 87.05295 | 117.6511 | 108.5378 |
| 6996  | SLC38A5   | 224.2322 | -0.72014 | 0.192783 | -3.7355  | 0.000187 | 0.000712 | 305.1946 | 257.2836 | 274.8139 | 160.7131 | 177.5462 | 169.8415 |
| 11319 | LOC119628 | 128.0488 | -0.72014 | 0.282072 | -2.55305 | 0.010678 | 0.02508  | 133.3532 | 210.2061 | 133.5804 | 93.74933 | 106.9555 | 90.44815 |
| 14960 | NOTCH3    | 78.06801 | -0.72031 | 0.391045 | -1.84201 | 0.065473 | 0.116351 | 108.9594 | 76.09024 | 104.3597 | 42.41041 | 98.39909 | 38.18922 |
| 19023 | LOC11962  | 259.0706 | -0.72048 | 0.610237 | -1.18065 | 0.237741 | 0.332248 | 171.8414 | 599.9633 | 194.8048 | 218.7484 | 220.3284 | 148.737  |
| 23840 | SLC10A4   | 2.405773 | -0.72053 | 1.669353 | -0.43162 | 0        |          |          |          |          |          |          |          |



|       |           |          |          |          |          |          |          |          |          |          |          |          |          |
|-------|-----------|----------|----------|----------|----------|----------|----------|----------|----------|----------|----------|----------|----------|
| 13307 | NUDT7     | 79.33549 | -0.72116 | 0.336133 | -2.14547 | 0.031915 | 0.063761 | 111.1277 | 96.34448 | 91.14081 | 35.71403 | 66.31243 | 75.37346 |
| 3452  | EIF5A     | 17110.98 | -0.72131 | 0.122279 | -5.89888 | 3.66E-09 | 2.82E-08 | 23869.15 | 18204.73 | 21839.01 | 12395    | 11874.2  | 14483.76 |
| 2701  | DUSP12    | 1567.597 | -0.72156 | 0.105642 | -6.83022 | 8.48E-12 | 8.34E-11 | 1992.709 | 1848.062 | 2019.012 | 1124.992 | 1178.65  | 1242.155 |
| 20034 | LOC119620 | 13.07173 | -0.72169 | 0.706011 | -1.02221 | 0.306681 | 0.406963 | 15.7205  | 15.32753 | 17.39328 | 13.39276 | 8.556443 | 8.039836 |
| 20741 | LOC119615 | 14.79413 | -0.72173 | 0.791797 | -0.91151 | 0.362025 | 0.464029 | 19.51511 | 14.23271 | 20.17621 | 17.85702 | 14.97377 | 2.009959 |
| 2391  | MAFG      | 6433.035 | -0.72202 | 0.09912  | -7.28434 | 3.23E-13 | 3.59E-12 | 8360.056 | 7618.33  | 8062.135 | 4566.932 | 4648.287 | 5342.471 |
| 2941  | PPP4R4    | 1139.892 | -0.72287 | 0.111281 | -6.49592 | 8.25E-11 | 7.46E-10 | 1420.266 | 1493.339 | 1344.153 | 841.5119 | 889.87   | 850.2126 |
| 12544 | LOC103215 | 91.53943 | -0.72292 | 0.315132 | -2.29403 | 0.021789 | 0.046178 | 129.5586 | 94.15483 | 115.4914 | 87.05295 | 72.72976 | 50.24897 |
| 3184  | XPNPPEP3  | 1485.619 | -0.72347 | 0.117053 | -6.18067 | 6.38E-10 | 5.33E-09 | 1790.511 | 2042.941 | 1721.935 | 1053.564 | 1120.894 | 1183.866 |
| 15591 | LOC119620 | 6235.374 | -0.7235  | 0.417915 | -1.73122 | 0.083412 | 0.142228 | 8960.146 | 3847.758 | 10493.02 | 4767.823 | 4614.062 | 4729.433 |
| 11422 | HOXB5     | 129.3441 | -0.72356 | 0.285792 | -2.53178 | 0.011349 | 0.026417 | 158.2892 | 160.9391 | 164.1926 | 60.26743 | 136.9031 | 95.47305 |
| 2677  | LOC103225 | 2369.406 | -0.72357 | 0.105432 | -6.86289 | 6.75E-12 | 6.70E-11 | 3066.583 | 2750.197 | 3044.52  | 1756.684 | 1674.924 | 1923.531 |
| 10812 | LOC103215 | 392.2596 | -0.72358 | 0.271171 | -2.66834 | 0.007623 | 0.018743 | 355.6087 | 745.0275 | 362.476  | 310.2657 | 337.9795 | 242.2001 |
| 21951 | ANGPTL7   | 6.51022  | -0.72378 | 0.983187 | -0.73615 | 0.461637 | 0.559092 | 6.505036 | 9.306001 | 8.348776 | 4.464254 | 6.417332 | 4.019918 |
| 2446  | SRM       | 2562.544 | -0.7238  | 0.100524 | -7.20021 | 6.01E-13 | 6.53E-12 | 3269.323 | 3029.924 | 3283.852 | 1928.558 | 1805.409 | 2058.198 |
| 6264  | LOC103238 | 370.1022 | -0.72388 | 0.179012 | -4.04377 | 5.26E-05 | 0.000223 | 458.063  | 456.5415 | 461.9656 | 319.1942 | 303.7537 | 221.0955 |
| 3205  | CUNH1orf  | 1115.337 | -0.72399 | 0.117574 | -6.15775 | 7.38E-10 | 6.12E-09 | 1448.997 | 1273.827 | 1448.513 | 796.8693 | 853.5052 | 870.3122 |
| 23616 | LOC119620 | 2.793239 | -0.72419 | 1.553418 | -0.46619 | 0.64108  | 0.721616 | 2.168345 | 2.737059 | 5.565851 | 0        | 4.278221 | 2.009959 |
| 3760  | BEND7     | 1416.751 | -0.72427 | 0.129703 | -5.58405 | 2.35E-08 | 1.66E-07 | 1682.636 | 2033.087 | 1582.789 | 1053.564 | 1011.799 | 1136.632 |
| 2753  | MORC4     | 23825.59 | -0.72434 | 0.107002 | -6.76939 | 1.29E-11 | 1.25E-10 | 28100.13 | 34083.5  | 26870.54 | 17921.75 | 17517.18 | 18460.47 |
| 1681  | SMAD2     | 5282.114 | -0.72435 | 0.082534 | -8.77635 | 1.69E-18 | 2.67E-17 | 6507.747 | 6752.872 | 6484.216 | 3968.722 | 3938.103 | 4041.022 |
| 17832 | LOC119625 | 24.82124 | -0.72438 | 0.528002 | -1.37193 | 0.170085 | 0.253583 | 26.02015 | 35.58177 | 31.30791 | 13.39276 | 23.53022 | 19.09461 |
| 6099  | LOC103230 | 1009.66  | -0.72448 | 0.175769 | -4.12179 | 3.76E-05 | 0.000164 | 1042.974 | 1649.899 | 1081.167 | 736.6019 | 776.4972 | 770.8193 |
| 4011  | SKA3      | 640.9591 | -0.72468 | 0.135096 | -5.3642  | 8.13E-08 | 5.39E-07 | 767.5943 | 864.9107 | 763.2173 | 453.1218 | 515.5257 | 481.3852 |
| 17188 | GAL3ST2   | 29.26211 | -0.72492 | 0.493387 | -1.46928 | 0.141757 | 0.219262 | 35.23561 | 33.93953 | 38.96096 | 24.5534  | 27.80844 | 15.07469 |
| 9244  | ZNF311    | 178.6944 | -0.72508 | 0.238225 | -3.04368 | 0.002337 | 0.006721 | 211.4137 | 263.3051 | 189.9347 | 145.0883 | 151.8769 | 110.5477 |
| 15777 | LOC103215 | 37.78011 | -0.72514 | 0.425189 | -1.70545 | 0.088111 | 0.148471 | 44.45108 | 47.07742 | 48.7012  | 31.24978 | 32.08666 | 23.11453 |
| 3165  | EVIS      | 2638.084 | -0.72536 | 0.116974 | -6.201   | 5.61E-10 | 4.71E-09 | 3037.852 | 3748.129 | 3081.394 | 1915.165 | 1929.478 | 2116.487 |
| 2821  | CKAP4     | 5007.417 | -0.72544 | 0.108926 | -6.65997 | 2.74E-11 | 2.58E-10 | 6162.438 | 6913.264 | 5652.122 | 3613.814 | 3623.653 | 4079.212 |
| 4395  | LOC103225 | 3656.946 | -0.72562 | 0.142753 | -5.08306 | 3.71E-07 | 2.25E-06 | 3938.257 | 5693.083 | 4038.721 | 2843.73  | 2812.931 | 2614.957 |
| 20646 | LOC119625 | 11.72503 | -0.72568 | 0.781231 | -0.9289  | 0.352942 | 0.454468 | 16.80468 | 14.78012 | 11.82743 | 15.62489 | 4.278221 | 7.034856 |
| 20324 | PTGES     | 15.63836 | -0.72577 | 0.744862 | -0.97437 | 0.329872 | 0.431493 | 20.0572  | 16.42235 | 20.87194 | 8.928508 | 23.53022 | 4.019918 |
| 3798  | FBXO17    | 741.1338 | -0.72577 | 0.130843 | -5.5469  | 2.91E-08 | 2.04E-07 | 984.9709 | 880.2382 | 910.0166 | 562.496  | 509.1083 | 599.9727 |
| 2272  | LOC103238 | 65396.26 | -0.72599 | 0.097317 | -7.46006 | 8.65E-14 | 1.01E-12 | 79319.16 | 90522.21 | 74697.89 | 48682.69 | 47943.89 | 51211.74 |
| 4731  | PODXL     | 1316.615 | -0.72645 | 0.149426 | -4.86159 | 1.16E-06 | 6.54E-06 | 1451.707 | 2018.855 | 1455.47  | 957.5825 | 966.878  | 1049.199 |
| 5727  | LOC119618 | 330.457  | -0.72649 | 0.168538 | -4.31056 | 1.63E-05 | 7.56E-05 | 369.7029 | 419.8649 | 446.6595 | 256.6946 | 239.5804 | 250.2399 |
| 2830  | RPS15A    | 30877.01 | -0.72656 | 0.109299 | -6.64747 | 2.98E-11 | 2.80E-10 | 34958.07 | 38948.9  | 41558.82 | 24249.83 | 25063.96 | 20482.49 |
| 4657  | TSPAN6    | 1100.612 | -0.72675 | 0.147883 | -4.91436 | 8.91E-07 | 5.08E-06 | 1495.616 | 1095.371 | 1525.043 | 816.9585 | 855.6443 | 815.0383 |
| 3530  | ARGLU1    | 3928.973 | -0.72681 | 0.124759 | -5.82566 | 5.69E-09 | 4.28E-08 | 4399.031 | 5843.074 | 4453.377 | 2928.551 | 2934.86  | 3014.938 |
| 2823  | TDP1      | 1486.442 | -0.72694 | 0.109181 | -6.65814 | 2.77E-11 | 2.61E-10 | 1722.208 | 1989.295 | 1849.95  | 1091.51  | 1123.033 | 1142.662 |
| 11538 | LOC119625 | 112.7334 | -0.72695 | 0.290112 | -2.50575 | 0.012219 | 0.028154 | 125.764  | 179.5511 | 117.5786 | 69.19594 | 89.84265 | 94.46807 |
| 1406  | RPL7A     | 71012.59 | -0.72711 | 0.07643  | -9.51339 | 1.85E-21 | 3.49E-20 | 86803.21 | 91773.59 | 87037.39 | 54160.33 | 52803.95 | 53497.07 |
| 16017 | LOC119618 | 34.24148 | -0.7272  | 0.437484 | -1.66223 | 0.096466 | 0.160105 | 42.82482 | 42.69812 | 42.43961 | 24.5534  | 27.80844 | 25.12449 |
| 3003  | LMNB1     | 2740.292 | -0.72724 | 0.113443 | -6.41063 | 1.45E-10 | 1.28E-09 | 3231.919 | 3866.917 | 3154.446 | 1964.272 | 2068.52  | 2155.681 |
| 6356  | TIMM10B   | 1344.833 | -0.72734 | 0.181691 | -4.00315 | 6.25E-05 | 0.000261 | 1954.763 | 1153.944 | 1923.697 | 946.4218 | 1028.912 | 1061.258 |
| 16891 | LOC119625 | 30.69946 | -0.72774 | 0.482502 | -1.50826 | 0.131488 | 0.206951 | 43.36691 | 38.31883 | 33.39511 | 29.01765 | 14.97377 | 25.12449 |
| 11040 | LOC119625 | 102.5604 | -0.72783 | 0.277823 | -2.61974 | 0.0088   | 0.02119  | 147.4475 | 115.5039 | 118.9701 | 84.82083 | 81.28621 | 67.33362 |
| 2934  | NVL       | 2231.046 | -0.72793 | 0.111903 | -6.50495 | 7.77E-11 | 7.04E-10 | 2729.947 | 3078.097 | 2539.42  | 1745.523 | 1580.803 | 1712.485 |
| 4551  | FAM161A   | 589.7149 | -0.72844 | 0.146532 | -4.97122 | 6.65E-07 | 3.89E-06 | 717.7224 | 820.0229 | 665.8149 | 437.4969 | 479.1608 | 418.0715 |
| 2703  | GIT1      | 2870.456 | -0.72857 | 0.106687 | -6.82904 | 8.55E-12 | 8.41E-11 | 3616.8   | 3399.975 | 3733.295 | 2104.896 | 1982.956 | 2384.816 |
| 2461  | LOC103215 | 1710.471 | -0.72859 | 0.101458 | -7.18118 | 6.91E-13 | 7.47E-12 | 2045.834 | 2165.561 | 2185.292 | 1281.241 | 1349.779 | 1235.12  |
| 10874 | LPCAT2    | 94.7401  | -0.72865 | 0.274416 | -2.65528 | 0.007924 | 0.019374 | 113.8381 | 125.3573 | 114.7957 | 66.96381 | 79.14709 | 68.3386  |
| 2208  | WDR46     | 3932.649 | -0.72887 | 0.096088 | -7.58549 | 3.31E-14 | 3.99E-13 | 5144.942 | 4838.026 | 4741.409 | 2843.73  | 2845.017 | 3182.77  |
| 11087 | MEIG1     | 97.77784 | -0.72888 | 0.279439 | -2.60838 | 0.009097 | 0.021815 | 118.7169 | 122.0728 | 123.8402 | 64.73168 | 91.98176 | 65.32367 |
| 3810  | COL8A1    | 3807.613 | -0.72894 | 0.1318   | -5.53065 | 3.19E-08 | 2.23E-07 | 4272.725 | 5721.001 | 4257.18  | 2935.247 | 2654.636 | 3004.889 |
| 3514  | LTO1      | 700.5718 | -0.72921 | 0.12476  | -5.84494 | 5.07E-09 | 3.83E-08 | 888.4796 | 834.803  | 900.9721 | 520.0856 | 513.3866 | 545.7039 |
| 22529 | PLA2G7    | 5.095163 | -0.72932 | 1.146381 | -0.63619 | 0.52465  | 0.619106 | 4.878777 | 9.853413 | 4.174388 | 2.232127 | 6.417332 | 3.014938 |
| 5420  | LOC119625 | 647.6711 | -0.72955 | 0.163902 | -4.45113 | 8.54E-06 | 4.19E-05 | 751.8738 | 977.6775 | 691.557  | 513.3892 | 496.2737 | 455.2557 |
| 7669  | LOC103215 | 1057.292 | -0.73023 | 0.208427 | -3.50356 | 0.000459 | 0.001591 | 1028.88  | 1892.403 | 1035.248 | 814.7263 | 810.7229 | 761.7744 |
| 2144  | METTL16   | 2321.267 | -0.73026 | 0.094905 | -7.69465 | 1.42E-14 | 1.76E-13 | 2972.26  | 2900.188 | 2821.886 | 1678.559 | 1732.68  | 1822.028 |
| 8083  | LOC103225 | 166.3259 | -0.7306  | 0.215687 | -3.38729 | 0.000706 | 0.002322 | 209.7874 | 190.4993 | 223.3298 | 122.767  | 121.9293 | 129.6424 |
| 9535  | LOC103215 | 166.8331 | -0.73071 | 0.245587 | -2.97536 | 0.002926 | 0.008159 | 227.6763 | 179.0037 | 221.9383 | 116.0706 | 100.5382 | 155.7718 |
| 2429  | MTX3      | 2019.431 | -0.73114 | 0.101129 | -7.22977 | 4.84E-13 | 5.30E-12 | 2632.371 | 2567.361 | 2364.791 | 1506.686 | 1469.569 | 1575.808 |
| 4486  | GTSE1     | 917.7233 | -0.73117 | 0.145679 | -5.01904 | 5.19E-07 | 3.08E-06 | 1055.442 | 1352.655 | 1030.378 | 698.6557 | 639.5941 | 729.6151 |
| 6872  | LOC103245 | 242.9842 | -0.7314  | 0.193083 | -3.788   | 0.000152 | 0.000587 | 323.6256 | 266.0421 | 319.3407 | 200.8914 | 171.1289 | 176.8764 |
| 3677  | SERBP1    | 20956.96 | -0.73147 | 0.12897  | -5.67162 | 1.41E-08 | 1.02E-07 | 23374.76 | 31946.95 | 23157.42 | 15430.69 | 15200.52 | 16631.41 |
| 21822 | LOC103225 | 7.212464 | -0.73196 | 0.967441 | -0.75659 | 0.449296 | 0.547337 | 8.673382 | 9.306001 | 9.740239 | 2.232127 | 4.278221 | 9.044815 |
| 3216  | ARNT2     | 795.6309 | -0.73199 | 0.119062 | -6.14801 | 7.85E-10 | 6.49E-09 | 995.8127 | 1012.164 | 972.6325 | 618.2992 | 566.8643 | 608.0126 |
| 3482  | RIOK2     | 1681.733 | -0.73253 | 0.124672 | -5.87567 | 4.21E-09 | 3.22E-08 | 2033.366 | 2376.862 | 1890.302 | 1156.242 | 1341.222 | 1292.404 |
| 3331  | NCAPIH    | 2385.507 | -0.73273 | 0.121838 | -6.01394 | 1.81E-09 | 1.45E-08 | 2819.391 | 3436.651 | 2683.436 | 1729.898 | 1741.236 | 1902.426 |
| 9179  | LOC119625 | 138.2539 | -0.73277 |          |          |          |          |          |          |          |          |          |          |



|       |           |            |          |          |          |          |          |          |          |          |          |          |          |
|-------|-----------|------------|----------|----------|----------|----------|----------|----------|----------|----------|----------|----------|----------|
| 4646  | CDK12     | 4823.669   | -0.73292 | 0.148965 | -4.92008 | 8.65E-07 | 4.95E-06 | 5099.406 | 7719.601 | 5251.38  | 3611.581 | 3546.645 | 3713.399 |
| 5216  | LOC119621 | 1022.924   | -0.73318 | 0.160385 | -4.57137 | 4.85E-06 | 2.47E-05 | 1472.307 | 991.3628 | 1367.808 | 832.5834 | 718.7412 | 754.7396 |
| 2574  | ZNF740    | 2694.12    | -0.73337 | 0.104491 | -7.01843 | 2.24E-12 | 2.32E-11 | 3443.333 | 3413.113 | 3246.283 | 1948.647 | 1880.278 | 2233.064 |
| 12714 | DEPDC4    | 70.63502   | -0.7334  | 0.32522  | -2.25508 | 0.024128 | 0.050452 | 96.49137 | 80.46954 | 88.35788 | 40.17829 | 62.03421 | 56.27885 |
| 2115  | SOC55     | 3187.631   | -0.73357 | 0.09441  | -7.77006 | 7.85E-15 | 9.86E-14 | 3911.695 | 4219.998 | 3815.391 | 2341.501 | 2350.883 | 2486.319 |
| 3858  | ACD       | 583.1354   | -0.73363 | 0.133702 | -5.48705 | 4.09E-08 | 2.82E-07 | 706.3385 | 770.2084 | 708.9503 | 453.1218 | 414.9875 | 445.2059 |
| 4012  | MAGOH     | 1309.922   | -0.73365 | 0.136812 | -5.3625  | 8.21E-08 | 5.44E-07 | 1495.502 | 1467.297 | 979.9037 | 981.8518 | 989.9048 |          |
| 2457  | GLDC      | 5855.831   | -0.73366 | 0.102092 | -7.18632 | 6.66E-13 | 7.20E-12 | 7216.254 | 7707.011 | 7027.583 | 4207.559 | 4096.397 | 4880.18  |
| 2263  | EPHB2     | 8894.071   | -0.73371 | 0.098053 | -7.48286 | 7.27E-14 | 8.54E-13 | 10646.03 | 12043.61 | 10641.91 | 6618.256 | 6261.177 | 7153.444 |
| 22243 | LOC103232 | 6.656408   | -0.73372 | 1.071007 | -0.68508 | 0.493295 | 0.589556 | 9.757555 | 2.189647 | 13.2189  | 4.464254 | 4.278221 | 6.029877 |
| 2555  | LOC103234 | 4118.11    | -0.73388 | 0.104249 | -7.03972 | 1.93E-12 | 2.00E-11 | 4975.811 | 5552.398 | 4909.081 | 3102.657 | 2832.183 | 3336.532 |
| 7426  | COA3      | 1566.064   | -0.7339  | 0.204407 | -3.59038 | 0.00033  | 0.001182 | 2452.399 | 1239.34  | 2179.726 | 1122.76  | 1069.555 | 1332.603 |
| 2805  | NHLRC2    | 2272.192   | -0.73395 | 0.10976  | -6.68684 | 2.28E-11 | 2.16E-10 | 2695.796 | 3167.325 | 2651.432 | 1734.363 | 1655.672 | 1728.565 |
| 2819  | LIG1      | 3356.027   | -0.73396 | 0.110198 | -6.6604  | 2.73E-11 | 2.58E-10 | 4395.778 | 4023.477 | 4165.344 | 2499.982 | 2239.649 | 2811.933 |
| 4787  | LOC119621 | 488.7302   | -0.73399 | 0.152259 | -4.82066 | 1.43E-06 | 7.95E-06 | 535.5813 | 662.3683 | 634.507  | 357.1403 | 367.927  | 374.8573 |
| 4440  | DROSHA    | 3022.515   | -0.73423 | 0.14539  | -5.05009 | 4.42E-07 | 2.64E-06 | 3313.774 | 4753.724 | 3258.11  | 2292.394 | 2258.901 | 2258.189 |
| 4744  | DTWD2     | 403.2758   | -0.73462 | 0.151442 | -4.85083 | 1.23E-06 | 6.89E-06 | 480.2885 | 528.7998 | 500.2309 | 321.4263 | 299.4755 | 289.4341 |
| 3395  | RP56KB1   | 4043.743   | -0.73482 | 0.12353  | -5.94855 | 2.71E-09 | 2.12E-08 | 4645.68  | 5993.612 | 4518.08  | 2966.497 | 2999.033 | 3139.556 |
| 18195 | LPAR2     | 20.74992   | -0.73489 | 0.564183 | -1.30257 | 0.19272  | 0.281587 | 28.18849 | 21.89647 | 27.82925 | 13.39276 | 17.11289 | 16.07967 |
| 11342 | LOC103240 | 96.44003   | -0.735   | 0.28848  | -2.54784 | 0.010839 | 0.025405 | 124.6799 | 122.0728 | 112.0128 | 75.89232 | 87.70354 | 56.27885 |
| 17346 | LOC119618 | 38.71063   | -0.73527 | 0.510699 | -1.43973 | 0.149943 | 0.229819 | 62.88202 | 26.27577 | 54.96278 | 44.64254 | 21.39111 | 22.10955 |
| 2434  | NOB1      | 1701.545   | -0.73544 | 0.101845 | -7.22121 | 5.15E-13 | 5.63E-12 | 2135.278 | 2195.121 | 2052.408 | 1263.384 | 1221.432 | 1341.648 |
| 1696  | HIST1H2BC | 4907.237   | -0.73561 | 0.084143 | -8.74229 | 2.28E-18 | 3.58E-17 | 5944.519 | 6226.262 | 6221.926 | 3707.563 | 3741.305 | 3601.846 |
| 11420 | LOC103225 | 123.6244   | -0.73564 | 0.290565 | -2.53175 | 0.01135  | 0.026417 | 190.2723 | 107.2927 | 165.5841 | 100.4457 | 87.70354 | 90.44815 |
| 3363  | RBM28     | 1277.985   | -0.73577 | 0.123128 | -5.97566 | 2.29E-09 | 1.81E-08 | 1480.98  | 1808.649 | 1502.78  | 939.7255 | 951.9042 | 983.8749 |
| 3032  | TBRG1     | 1175.979   | -0.7359  | 0.115635 | -6.36401 | 1.97E-10 | 1.72E-09 | 1491.28  | 1421.081 | 1499.997 | 790.173  | 934.7914 | 918.5512 |
| 10446 | LEAP2     | 113.3937   | -0.73609 | 0.26706  | -2.75626 | 0.005847 | 0.01488  | 144.7371 | 129.1892 | 148.8865 | 104.91   | 81.28621 | 71.35354 |
| 4190  | FKBP14    | 587.3226   | -0.7361  | 0.140711 | -5.23129 | 1.68E-07 | 1.07E-06 | 727.4799 | 759.8076 | 720.7777 | 410.7114 | 410.7092 | 494.4499 |
| 11267 | LOC119624 | 102.0144   | -0.73615 | 0.286889 | -2.56596 | 0.010289 | 0.024276 | 137.6899 | 119.3358 | 127.3188 | 84.82083 | 53.47777 | 89.44317 |
| 18260 | LOC103238 | 25.98807   | -0.73616 | 0.56997  | -1.29158 | 0.196503 | 0.286091 | 32.52518 | 30.10765 | 33.39511 | 15.62489 | 34.22577 | 10.04979 |
| 2818  | RAB34     | 4445.859   | -0.73617 | 0.110473 | -6.66381 | 2.67E-11 | 2.52E-10 | 5954.277 | 5088.74  | 5634.033 | 3290.155 | 3024.702 | 3683.25  |
| 21119 | LOC119627 | 9.989527   | -0.73633 | 0.854414 | -0.86179 | 0.388802 | 0.489431 | 11.38381 | 16.96977 | 9.740239 | 2.232127 | 8.556443 | 11.05477 |
| 8204  | MFSDB6    | 226.5441   | -0.73655 | 0.220205 | -3.34486 | 0.000823 | 0.002668 | 258.0331 | 347.6065 | 244.2017 | 147.3204 | 188.2417 | 173.8614 |
| 2544  | CLF3      | 1503.198   | -0.73657 | 0.104288 | -7.06284 | 1.63E-12 | 1.70E-11 | 1909.228 | 1950.976 | 1777.594 | 1089.278 | 1144.424 | 1144.424 |
| 2743  | KAT7      | 3917.156   | -0.73663 | 0.108567 | -6.78504 | 1.16E-11 | 1.12E-10 | 4651.643 | 5469.191 | 4572.347 | 2899.533 | 2778.705 | 3131.516 |
| 3007  | KLHL36    | 2111.079   | -0.73666 | 0.114932 | -6.40955 | 1.46E-10 | 1.29E-09 | 2812.344 | 2600.206 | 2512.286 | 1513.382 | 1452.456 | 1775.799 |
| 3161  | MAP4      | 10574.13   | -0.7371  | 0.118764 | -6.20642 | 5.42E-10 | 4.56E-09 | 11942.16 | 15588.65 | 12127.29 | 7716.463 | 7683.686 | 8386.554 |
| 16421 | CHODL     | 37.41339   | -0.73739 | 0.464936 | -1.586   | 0.112739 | 0.182521 | 46.07734 | 44.88777 | 47.30973 | 40.17829 | 29.94755 | 16.07967 |
| 2795  | SPTLC2    | 9246.729   | -0.73749 | 0.110003 | -6.70422 | 2.02E-11 | 1.93E-10 | 11028.75 | 13084.24 | 10572.33 | 6892.808 | 6464.392 | 7437.853 |
| 2654  | WIP1      | 1589.575   | -0.73766 | 0.10708  | -6.88883 | 5.63E-12 | 5.63E-11 | 2040.413 | 1923.058 | 2005.098 | 1176.331 | 1110.198 | 1282.354 |
| 2118  | BOD1      | 2871.096   | -0.7377  | 0.094985 | -7.76655 | 8.07E-15 | 1.01E-13 | 3610.837 | 3383.552 | 3775.734 | 2187.484 | 2094.189 | 2174.776 |
| 1965  | TRUB1     | 3412.411   | -0.73772 | 0.091576 | -8.05588 | 7.89E-16 | 1.07E-14 | 4180.028 | 4419.803 | 4193.869 | 2687.481 | 2539.124 | 2454.16  |
| 2318  | INTS11    | 2648.048   | -0.73831 | 0.099946 | -7.38715 | 1.50E-13 | 1.72E-12 | 3457.427 | 3101.088 | 3379.863 | 1997.754 | 1873.861 | 2078.298 |
| 3084  | RNF138    | 815.0964   | -0.73835 | 0.117275 | -6.29595 | 3.06E-10 | 2.63E-09 | 1019.664 | 1048.294 | 990.0257 | 598.21   | 620.3421 | 614.0425 |
| 22349 | LOC103227 | 6.43       | -0.73868 | 1.107625 | -0.66691 | 0.504832 | 0.600517 | 9.215468 | 10.94824 | 3.478657 | 2.232127 | 10.69555 | 2.009959 |
| 7317  | LOC119621 | 186.703    | -0.73869 | 0.203591 | -3.6283  | 0.000285 | 0.001037 | 234.7234 | 220.607  | 246.2889 | 131.6955 | 141.1813 | 145.722  |
| 5958  | CCDC15    | 510.5093   | -0.73967 | 0.176835 | -4.18282 | 2.88E-05 | 0.000128 | 601.7159 | 764.7343 | 545.4534 | 377.2295 | 434.2395 | 339.6831 |
| 2903  | ARHGAP15  | 1646.848   | -0.73969 | 0.11302  | -6.54479 | 5.96E-11 | 5.46E-10 | 2034.45  | 2240.557 | 1909.783 | 1176.331 | 1206.458 | 1313.508 |
| 3579  | PUS7      | 1303.862   | -0.73987 | 0.128116 | -5.77503 | 7.69E-09 | 5.72E-08 | 1625.175 | 1799.89  | 1466.602 | 1078.117 | 885.5918 | 967.7952 |
| 1731  | PRELID1   | 5744.941   | -0.73998 | 0.085687 | -8.63579 | 5.83E-18 | 8.96E-17 | 7379.964 | 7051.759 | 7131.942 | 4392.826 | 4094.258 | 4418.895 |
| 4111  | EYA3      | 1523.516   | -0.74    | 0.140004 | -5.28558 | 1.25E-07 | 8.10E-07 | 1756.902 | 2292.561 | 1670.451 | 1098.206 | 1123.033 | 1199.945 |
| 10227 | DOK3      | 140.4623   | -0.74011 | 0.263534 | -2.80841 | 0.004979 | 0.012941 | 142.5687 | 214.5854 | 169.7585 | 89.28508 | 124.0684 | 102.5079 |
| 9876  | LOC103247 | 274.7805   | -0.74039 | 0.256425 | -2.88734 | 0.003885 | 0.010458 | 385.9655 | 212.3958 | 433.4406 | 212.0521 | 196.7982 | 208.0308 |
| 7486  | CUNH16orf | 1168.618   | -0.74039 | 0.207556 | -3.5672  | 0.000361 | 0.001281 | 1794.306 | 926.2208 | 1667.668 | 915.1721 | 763.6625 | 944.6807 |
| 2305  | UTP6      | 4457.9     | -0.74053 | 0.099979 | -7.40687 | 1.29E-13 | 1.49E-12 | 5554.759 | 6058.207 | 5118.496 | 3223.191 | 3480.333 | 3312.412 |
| 10460 | RSDA2     | 108.383    | -0.74056 | 0.268895 | -2.75407 | 0.005886 | 0.014959 | 135.5216 | 126.4521 | 142.6249 | 98.21359 | 79.14709 | 68.3386  |
| 4264  | LDLRAD4   | 499.5572   | -0.74071 | 0.142994 | -5.18005 | 2.22E-07 | 1.38E-06 | 587.6216 | 660.1786 | 625.4625 | 401.7829 | 361.5097 | 360.7876 |
| 4740  | EXOSC5    | 990.7724   | -0.74091 | 0.152546 | -4.85693 | 1.19E-06 | 6.69E-06 | 1407.798 | 992.4576 | 1321.89  | 727.6734 | 705.9065 | 788.9089 |
| 3903  | CUNH5orf  | 5274.869   | -0.74097 | 0.136174 | -5.44135 | 5.29E-08 | 3.60E-07 | 5850.738 | 8181.07  | 5768.309 | 3999.972 | 3948.798 | 3900.325 |
| 6220  | CENPL     | 390.678    | -0.74119 | 0.182287 | -4.06608 | 4.78E-05 | 0.000204 | 546.9651 | 390.3046 | 528.7558 | 310.2657 | 282.3626 | 285.4142 |
| 13772 | VWA3A     | 52.44094   | -0.7414  | 0.361259 | -2.05227 | 0.040143 | 0.077491 | 72.63957 | 60.2153  | 64.00729 | 37.94616 | 40.6431  | 39.1942  |
| 4479  | CEP290    | 2305.555   | -0.74149 | 0.147587 | -5.02407 | 5.06E-07 | 3.00E-06 | 2613.398 | 3615.655 | 2426.015 | 1700.881 | 1766.905 | 1710.475 |
| 2754  | HAX1      | 4563.204   | -0.74149 | 0.109556 | -6.76814 | 1.30E-11 | 1.26E-10 | 5361.234 | 6468.765 | 5297.299 | 3484.35  | 3529.533 | 3238.044 |
| 17992 | LOC119627 | 22.93072   | -0.74168 | 0.551607 | -1.34457 | 0.178764 | 0.264141 | 24.39389 | 31.74989 | 29.22072 | 15.62489 | 23.53022 | 13.06473 |
| 2087  | HDHD2     | 2222.094   | -0.74185 | 0.094951 | -7.81298 | 5.59E-15 | 7.11E-14 | 2825.354 | 2716.257 | 2800.319 | 1743.291 | 1602.194 | 1645.151 |
| 18145 | LOC119618 | 26.57301   | -0.74198 | 0.564992 | -1.31326 | 0.189096 | 0.277026 | 40.11439 | 16.96977 | 43.13534 | 17.85702 | 19.252   | 22.10955 |
| 13714 | LOC119627 | 55.29161   | -0.74205 | 0.359099 | -2.06643 | 0.038788 | 0.075191 | 59.6295  | 80.46954 | 67.48594 | 40.17829 | 42.78221 | 41.20416 |
| 2788  | SACS      | 7589.609   | -0.74212 | 0.110426 | -6.72051 | 1.81E-11 | 1.73E-10 | 8792.099 | 10789.49 | 8923.451 | 5517.818 | 5405.533 | 6109.27  |
| 1892  | PELI1     | 4798.702   | -0.74212 | 0.090383 | -8.21086 | 2.20E-16 | 3.09E-15 | 5915.789 | 6316.038 | 5791.268 | 3624.974 | 3424.716 | 3719.429 |
| 4199  | IFT20     | 1095.637   | -0.74239 | 0.142295 | -5.21726 | 1.82E-07 | 1.15E-06 | 1508.626 | 1126.574 | 1481.908 | 810.2621 | 787.1927 | 859.2574 |
| 13531 | LOC103227 | 65.26194</ |          |          |          |          |          |          |          |          |          |          |          |



|       |           |          |          |          |          |          |          |          |          |          |          |          |          |
|-------|-----------|----------|----------|----------|----------|----------|----------|----------|----------|----------|----------|----------|----------|
| 14183 | PECAM1    | 66.79065 | -0.74285 | 0.37523  | -1.97973 | 0.047734 | 0.089474 | 58.00324 | 102.9134 | 88.35788 | 49.10679 | 64.17332 | 38.18922 |
| 3175  | IFT46     | 833.1465 | -0.74298 | 0.119989 | -6.19204 | 5.94E-10 | 4.97E-09 | 1030.506 | 1100.845 | 998.3745 | 600.4422 | 639.5941 | 629.1171 |
| 16587 | LOC119624 | 93.45502 | -0.74319 | 0.476581 | -1.55941 | 0.118899 | 0.190567 | 200.0299 | 44.34036 | 108.5341 | 60.26743 | 47.06043 | 100.4979 |
| 18317 | LOC119623 | 19.38963 | -0.74321 | 0.580703 | -1.27985 | 0.2006   | 0.291147 | 23.30971 | 24.63353 | 25.04633 | 11.16063 | 17.11289 | 15.07469 |
| 15178 | LOC119615 | 43.80049 | -0.74351 | 0.41294  | -1.80052 | 0.071778 | 0.125723 | 64.50828 | 47.62483 | 52.17985 | 24.5534  | 42.78221 | 31.15436 |
| 1858  | WNT5A     | 5791.589 | -0.74362 | 0.089759 | -8.28466 | 1.18E-16 | 1.69E-15 | 7012.429 | 7657.196 | 7092.286 | 4200.863 | 4248.274 | 4538.487 |
| 3532  | CBX4      | 1478.031 | -0.74389 | 0.127729 | -5.82399 | 5.75E-09 | 4.32E-08 | 1757.986 | 2062.1   | 1733.067 | 1214.277 | 971.1562 | 1129.597 |
| 13913 | LOC119618 | 55.65917 | -0.74398 | 0.366807 | -2.02825 | 0.042535 | 0.081276 | 80.77087 | 56.38342 | 70.9646  | 46.87467 | 42.78221 | 36.17926 |
| 2397  | EXT1      | 7096.462 | -0.74432 | 0.102324 | -7.27417 | 3.49E-13 | 3.87E-12 | 8772.042 | 9675.504 | 8222.153 | 5176.302 | 5003.38  | 5729.388 |
| 8412  | LOC119622 | 196.1028 | -0.74446 | 0.227076 | -3.27845 | 0.001044 | 0.003299 | 209.7874 | 285.2016 | 238.6359 | 169.6417 | 149.7377 | 123.6125 |
| 23058 | LOC119621 | 3.8069   | -0.74448 | 1.347471 | -0.5525  | 0.580605 | 0.669415 | 3.252518 | 7.116354 | 4.174388 | 0        | 4.278221 | 4.019918 |
| 9238  | TMOD4     | 160.2802 | -0.74456 | 0.244516 | -3.04502 | 0.002327 | 0.006696 | 190.8144 | 237.0293 | 171.8456 | 118.3027 | 141.1813 | 102.5079 |
| 7514  | LOC103248 | 178.4492 | -0.7447  | 0.209539 | -3.554   | 0.000379 | 0.001342 | 222.7975 | 221.1544 | 224.0255 | 145.0883 | 139.0422 | 118.5876 |
| 2680  | HMGB1     | 6646.584 | -0.74471 | 0.108558 | -6.86008 | 6.88E-12 | 6.83E-11 | 7780.566 | 9502.522 | 7693.397 | 5035.678 | 4768.078 | 5099.266 |
| 12041 | ZNF461    | 73.47536 | -0.74482 | 0.310518 | -2.39863 | 0.016456 | 0.036334 | 91.6126  | 97.4393  | 86.96642 | 62.49956 | 47.06043 | 55.27387 |
| 4161  | CENPQ     | 672.7182 | -0.74511 | 0.14193  | -5.24982 | 1.52E-07 | 9.73E-07 | 832.1026 | 872.5744 | 816.0929 | 564.7281 | 517.6648 | 433.1462 |
| 2076  | LOC103238 | 3566.292 | -0.74533 | 0.095022 | -7.84381 | 4.37E-15 | 5.60E-14 | 4300.371 | 4622.345 | 4472.161 | 2787.927 | 2731.644 | 2483.304 |
| 14499 | LOC119625 | 51.05674 | -0.74554 | 0.387217 | -1.92539 | 0.054181 | 0.099345 | 53.12446 | 81.01695 | 57.7457  | 33.4819  | 42.78221 | 38.18922 |
| 2213  | SMARCAD1  | 4562.398 | -0.74572 | 0.098379 | -7.58008 | 3.45E-14 | 4.15E-13 | 5536.328 | 6255.275 | 5352.957 | 3403.994 | 3512.42  | 3313.417 |
| 2235  | HEBP2     | 2558.191 | -0.74575 | 0.098939 | -7.53746 | 4.79E-14 | 5.70E-13 | 3055.741 | 3231.372 | 3321.422 | 1991.057 | 1963.704 | 1785.849 |
| 14485 | LOC103222 | 59.22886 | -0.74608 | 0.387006 | -1.92783 | 0.053876 | 0.098882 | 92.69677 | 52.55153 | 76.53045 | 58.0353  | 36.36488 | 39.1942  |
| 2385  | KYAT3     | 2070.639 | -0.74616 | 0.102303 | -7.29369 | 3.02E-13 | 3.36E-12 | 2670.86  | 2474.301 | 2645.171 | 1504.454 | 1473.847 | 1655.201 |
| 2665  | AHI1      | 1812.495 | -0.74661 | 0.108557 | -6.87759 | 6.09E-12 | 6.07E-11 | 2247.49  | 2468.28  | 2094.847 | 1381.687 | 1371.17  | 1311.498 |
| 19115 | LOC119627 | 19.19731 | -0.74665 | 0.640505 | -1.16573 | 0.243724 | 0.33897  | 24.39389 | 16.42235 | 32.00364 | 17.85702 | 6.417332 | 18.08963 |
| 21986 | LOC103228 | 6.25945  | -0.74689 | 1.02321  | -0.72995 | 0.465421 | 0.562777 | 6.505036 | 9.853413 | 7.653045 | 2.232127 | 4.278221 | 7.034856 |
| 3771  | ARAP2     | 1799.388 | -0.74719 | 0.134059 | -5.57358 | 2.50E-08 | 1.76E-07 | 2076.191 | 2691.076 | 2000.228 | 1305.794 | 1324.11  | 1398.931 |
| 15311 | LOC119628 | 47.91806 | -0.74721 | 0.420332 | -1.77767 | 0.075458 | 0.131021 | 76.43418 | 42.69812 | 60.52863 | 46.87467 | 27.80844 | 33.16432 |
| 22391 | LOC119619 | 5.592232 | -0.74742 | 1.133428 | -0.65944 | 0.509616 | 0.605071 | 2.710432 | 8.211177 | 9.740239 | 4.464254 | 6.417332 | 2.009959 |
| 7798  | LOC119627 | 187.2519 | -0.74751 | 0.215684 | -3.46577 | 0.000529 | 0.001802 | 260.7435 | 214.5854 | 231.6785 | 127.2312 | 130.4858 | 158.7868 |
| 3591  | POLR3B    | 3215.444 | -0.74755 | 0.129919 | -5.75392 | 8.72E-09 | 6.46E-08 | 3721.965 | 4796.422 | 3575.364 | 2441.947 | 2220.397 | 2536.568 |
| 2474  | PAQR3     | 1606.602 | -0.74795 | 0.104458 | -7.1603  | 8.05E-13 | 8.65E-12 | 2122.268 | 1892.95  | 2028.057 | 1165.17  | 1217.154 | 1214.015 |
| 11221 | SAMD13    | 91.00502 | -0.74803 | 0.29033  | -2.5765  | 0.009981 | 0.023647 | 124.1378 | 114.9565 | 102.2725 | 82.5887  | 57.75599 | 64.31869 |
| 3961  | MRPL58    | 1812.627 | -0.74822 | 0.138477 | -5.40318 | 6.55E-08 | 4.39E-07 | 2410.658 | 1827.808 | 2577.685 | 1370.526 | 1377.587 | 1311.498 |
| 5474  | TMEM2001  | 361.7348 | -0.74842 | 0.169094 | -4.42606 | 9.60E-06 | 4.66E-05 | 459.1472 | 454.8992 | 452.2254 | 249.9892 | 239.5804 | 314.5586 |
| 3257  | FASTKD3   | 751.4593 | -0.74845 | 0.12293  | -6.08847 | 1.14E-09 | 9.30E-09 | 962.2033 | 941.0009 | 927.4099 | 535.7105 | 545.4732 | 596.9578 |
| 13972 | LOC103217 | 64.72323 | -0.74856 | 0.371125 | -2.01702 | 0.043694 | 0.083138 | 89.98634 | 74.44801 | 76.53045 | 71.42806 | 42.78221 | 33.16432 |
| 19028 | SNAP91    | 26.58    | -0.74865 | 0.634619 | -1.17968 | 0.238126 | 0.332699 | 31.9831  | 36.12918 | 30.61218 | 8.928508 | 42.78221 | 9.044815 |
| 2148  | PDCD6     | 2981.072 | -0.74873 | 0.097442 | -7.68386 | 1.54E-14 | 1.91E-13 | 4011.439 | 3516.026 | 3688.072 | 2174.092 | 2222.536 | 2274.269 |
| 4165  | TFPT      | 946.5153 | -0.74874 | 0.142664 | -5.24827 | 1.54E-07 | 9.80E-07 | 1093.93  | 1381.667 | 1088.124 | 707.5843 | 646.0114 | 761.7744 |
| 22758 | LOC119628 | 5.113467 | -0.74899 | 1.248737 | -0.5998  | 0.548641 | 0.6409   | 9.757555 | 6.568942 | 2.782925 | 0        | 8.556443 | 3.014938 |
| 1342  | RPL30     | 21216    | -0.74905 | 0.076963 | -9.73269 | 2.19E-22 | 4.33E-21 | 25803.31 | 27053.64 | 26950.55 | 15912.83 | 15966.32 | 15609.34 |
| 10821 | RNF112    | 148.7051 | -0.74921 | 0.281038 | -2.66587 | 0.007679 | 0.018866 | 183.2252 | 187.7623 | 183.6731 | 122.767  | 145.4595 | 69.34358 |
| 18054 | TRNAI-UAI | 45.71622 | -0.74928 | 0.561851 | -1.3336  | 0.182336 | 0.268494 | 67.7608  | 16.96977 | 86.96642 | 44.64254 | 27.80844 | 30.14938 |
| 23093 | LOC119625 | 3.80398  | -0.74929 | 1.372525 | -0.54592 | 0.585119 | 0.673598 | 5.96295  | 3.284471 | 4.87012  | 6.696381 | 0        | 2.009959 |
| 4840  | MARCHF3   | 552.7809 | -0.7494  | 0.156501 | -4.78851 | 1.68E-06 | 9.23E-06 | 705.7965 | 610.3642 | 766.696  | 357.1403 | 438.5177 | 438.171  |
| 22421 | LOC119621 | 4.864877 | -0.74949 | 1.147532 | -0.65313 | 0.513674 | 0.609073 | 6.505036 | 6.02153  | 6.261582 | 2.232127 | 2.139111 | 6.029877 |
| 15937 | LOC103245 | 44.26073 | -0.74974 | 0.446781 | -1.6781  | 0.093328 | 0.155683 | 71.5554  | 33.39212 | 61.92009 | 35.71403 | 27.80844 | 35.17428 |
| 2285  | IDH3B     | 3646.538 | -0.7498  | 0.100737 | -7.44311 | 9.83E-14 | 1.14E-12 | 4889.619 | 4307.036 | 4529.211 | 2734.356 | 2532.707 | 2886.301 |
| 6831  | CUNH3orf  | 220.9696 | -0.75008 | 0.197041 | -3.80669 | 0.000141 | 0.000548 | 307.363  | 257.831  | 267.1608 | 171.8738 | 149.7377 | 171.8515 |
| 3096  | TMEM40    | 1279.188 | -0.75017 | 0.119346 | -6.28566 | 3.26E-10 | 2.80E-09 | 1650.111 | 1436.409 | 1730.284 | 926.3327 | 939.0696 | 992.9197 |
| 7938  | LOC103238 | 647.378  | -0.75025 | 0.218897 | -3.42744 | 0.000609 | 0.002041 | 655.9245 | 1144.638 | 632.4198 | 520.0856 | 509.1083 | 422.0914 |
| 13568 | LOC103215 | 122.0335 | -0.75038 | 0.358149 | -2.09516 | 0.036157 | 0.070845 | 91.07051 | 241.4086 | 125.9274 | 102.6778 | 87.70354 | 83.4133  |
| 1727  | PDCD2     | 3665.91  | -0.75133 | 0.086862 | -8.6497  | 5.16E-18 | 7.95E-17 | 4657.064 | 4700.625 | 4442.245 | 2720.963 | 2703.836 | 2770.728 |
| 8558  | LOC103235 | 157.5182 | -0.75141 | 0.231978 | -3.23914 | 0.001199 | 0.003724 | 181.5989 | 228.8181 | 182.9774 | 104.91   | 126.2075 | 120.5975 |
| 18303 | LOC103234 | 26.54823 | -0.75142 | 0.586436 | -1.28133 | 0.200077 | 0.290611 | 39.03022 | 15.87494 | 45.22254 | 13.39276 | 25.66933 | 20.09959 |
| 19370 | FABP4     | 15.07899 | -0.75194 | 0.668722 | -1.12445 | 0.260824 | 0.357977 | 19.51511 | 16.42235 | 20.17621 | 15.62489 | 10.69555 | 8.039836 |
| 2937  | CCDC59    | 1449.194 | -0.7522  | 0.115684 | -6.5022  | 7.92E-11 | 7.16E-10 | 1749.313 | 1976.157 | 1725.414 | 1075.885 | 1159.398 | 1008.999 |
| 2939  | STN1      | 956.0433 | -0.75229 | 0.115762 | -6.49861 | 8.11E-11 | 7.33E-10 | 1251.135 | 1201.022 | 1147.957 | 736.6019 | 675.959  | 723.5852 |
| 6475  | CFAP251   | 293.2813 | -0.75245 | 0.190479 | -3.95031 | 7.81E-05 | 0.00032  | 340.4302 | 421.5071 | 338.8212 | 220.9806 | 245.9977 | 191.9511 |
| 3857  | YARS2     | 1310.84  | -0.75247 | 0.137132 | -5.48722 | 4.08E-08 | 2.81E-07 | 1877.787 | 1412.322 | 1650.275 | 908.4757 | 951.9042 | 1064.273 |
| 2356  | PRMT5     | 3933.975 | -0.75254 | 0.102672 | -7.3296  | 2.31E-13 | 2.60E-12 | 4697.178 | 5440.179 | 4678.793 | 2917.39  | 2800.096 | 3070.212 |
| 2713  | NBR1      | 8925.37  | -0.75277 | 0.110362 | -6.82093 | 9.05E-12 | 8.86E-11 | 10914.37 | 12720.76 | 9976.092 | 6609.328 | 6318.933 | 7012.747 |
| 4566  | NAT9      | 655.7439 | -0.75282 | 0.151731 | -4.96154 | 6.99E-07 | 4.07E-06 | 899.8634 | 690.8337 | 875.9258 | 511.1571 | 498.4128 | 458.2706 |
| 1963  | AKR1E2    | 2518.551 | -0.75284 | 0.093333 | -8.06611 | 7.26E-16 | 9.83E-15 | 3199.394 | 3150.355 | 3139.14  | 1785.702 | 1876     | 1960.715 |
| 23941 | TRNAP-AG  | 1.938963 | -0.75291 | 1.806214 | -0.41684 | 0.676792 | 0.751536 | 2.168345 | 3.831883 | 1.391463 | 2.232127 | 0        | 2.009959 |
| 2014  | POLD2     | 8364.929 | -0.75311 | 0.094797 | -7.94442 | 1.95E-15 | 2.58E-14 | 10352.22 | 10747.34 | 10410.92 | 6089.242 | 5767.042 | 6822.806 |
| 17007 | BMP8B     | 30.00476 | -0.75325 | 0.505127 | -1.94121 | 0.135905 | 0.212444 | 42.82482 | 33.93953 | 34.78657 | 22.32127 | 32.08666 | 14.06971 |
| 14599 | LOC103246 | 61.46378 | -0.75341 | 0.395187 | -1.90647 | 0.056589 | 0.10305  | 60.17159 | 111.672  | 60.52863 | 44.64254 | 38.50399 | 53.26391 |
| 1463  | STK17B    | 8703.023 | -0.75363 | 0.080716 | -9.33681 | 9.93E-21 | 1.80E-19 | 11265.64 | 10680    | 10831.15 | 6372.723 | 6622.687 | 6445.938 |
| 11630 | LOC103233 | 80.73975 | -0.7538  | 0.303075 | -2.48718 | 0.012876 | 0.029434 | 98.11763 | 89.22813 | 116.1871 | 64.73168 | 59.8951  | 56.27885 |
| 2284  | KIF2C     | 3385.389 | -0.75399 | 0.1013   | -7.44317 | 9.83E-1  |          |          |          |          |          |          |          |



|       |           |          |          |          |          |          |          |          |          |          |          |          |          |
|-------|-----------|----------|----------|----------|----------|----------|----------|----------|----------|----------|----------|----------|----------|
| 2335  | NCAPD2    | 5543.507 | -0.75551 | 0.102654 | -7.35977 | 1.84E-13 | 2.10E-12 | 6985.325 | 7090.078 | 6823.733 | 4020.061 | 3737.026 | 4604.816 |
| 2960  | ANAPC4    | 1302.696 | -0.75556 | 0.116615 | -6.47906 | 9.23E-11 | 8.29E-10 | 1770.996 | 1492.792 | 1648.188 | 953.1182 | 939.0696 | 1012.014 |
| 2553  | QARS1     | 8439.86  | -0.75558 | 0.107307 | -7.04131 | 1.90E-12 | 1.98E-11 | 11297.08 | 9887.352 | 10628.69 | 6031.207 | 5749.929 | 7044.906 |
| 3432  | NOP58     | 5935.755 | -0.75564 | 0.127729 | -5.91597 | 3.30E-09 | 2.56E-08 | 6810.773 | 9018.61  | 6535.7   | 4424.076 | 4504.967 | 4320.407 |
| 16013 | LOC103221 | 33.67807 | -0.75566 | 0.45454  | -1.66248 | 0.096417 | 0.160073 | 40.65648 | 41.6033  | 43.83108 | 33.4819  | 21.39111 | 21.10457 |
| 2702  | TAGLN     | 1114.576 | -0.7557  | 0.110645 | -6.82991 | 8.50E-12 | 8.36E-11 | 1367.142 | 1457.21  | 1376.157 | 861.601  | 787.1927 | 838.1529 |
| 7048  | LOC119620 | 194.0901 | -0.75571 | 0.20353  | -3.71301 | 0.000205 | 0.000773 | 239.6022 | 232.1026 | 258.1163 | 140.624  | 160.4333 | 133.6623 |
| 8576  | LOC103222 | 212.0134 | -0.75572 | 0.233644 | -3.23451 | 0.001219 | 0.003777 | 303.5684 | 208.0165 | 290.8157 | 136.1597 | 147.5986 | 185.9212 |
| 12972 | LOC119621 | 156.0867 | -0.75583 | 0.342239 | -2.20848 | 0.027211 | 0.055766 | 157.7471 | 303.2661 | 124.5359 | 133.9276 | 132.6249 | 84.41828 |
| 16688 | TRNAL-AA  | 48.69637 | -0.75586 | 0.489355 | -1.5446  | 0.122444 | 0.19506  | 73.72375 | 33.39212 | 78.61764 | 20.08914 | 32.08666 | 54.26889 |
| 13329 | LOC103223 | 65.33651 | -0.75628 | 0.35294  | -2.1428  | 0.032129 | 0.064083 | 77.51835 | 81.56436 | 89.74935 | 44.64254 | 34.22577 | 64.31869 |
| 11897 | LOC119622 | 84.98899 | -0.75637 | 0.311813 | -2.4257  | 0.015279 | 0.034142 | 107.3331 | 100.1764 | 113.4042 | 42.41041 | 81.28621 | 65.32367 |
| 3218  | PARDB6    | 2120.629 | -0.75649 | 0.123173 | -6.14165 | 8.17E-10 | 6.75E-09 | 2478.961 | 3089.592 | 2426.711 | 1513.382 | 1567.968 | 1647.161 |
| 1977  | NT5C3B    | 2443.985 | -0.7568  | 0.094179 | -8.03579 | 9.30E-16 | 1.25E-14 | 2952.202 | 3153.639 | 3105.049 | 1772.309 | 1888.835 | 1791.878 |
| 2260  | AASDHPPT  | 3163.865 | -0.75691 | 0.10098  | -7.49566 | 6.60E-14 | 7.76E-13 | 4204.422 | 3672.038 | 4054.722 | 2341.501 | 2233.232 | 2477.274 |
| 3145  | SLC9A7    | 1025.019 | -0.75708 | 0.121637 | -6.22409 | 4.84E-10 | 4.09E-09 | 1264.145 | 1403.016 | 1198.745 | 774.5481 | 718.7412 | 790.9188 |
| 2802  | CAD       | 8836.564 | -0.75714 | 0.113172 | -6.69013 | 2.23E-11 | 2.12E-10 | 11494.94 | 10358.67 | 11469.13 | 6214.242 | 5918.919 | 7563.475 |
| 2216  | MAD2L1    | 3414.002 | -0.75742 | 0.100021 | -7.57261 | 3.66E-14 | 4.39E-13 | 4251.583 | 4042.089 | 4570.259 | 2631.678 | 2624.689 | 2363.712 |
| 3227  | EBAG9     | 1061.088 | -0.75743 | 0.123459 | -6.13506 | 8.51E-10 | 7.01E-09 | 1266.314 | 1441.335 | 1286.407 | 830.3512 | 823.5576 | 718.5603 |
| 12567 | GSDME     | 64.86787 | -0.75764 | 0.330834 | -2.2901  | 0.022015 | 0.046572 | 86.73382 | 79.92212 | 76.53045 | 51.33892 | 53.47777 | 41.20416 |
| 19907 | LOC119623 | 19.21352 | -0.75769 | 0.724158 | -1.0463  | 0.29542  | 0.395012 | 38.48813 | 15.32753 | 20.17621 | 4.464254 | 10.69555 | 26.12947 |
| 18495 | LOC103231 | 19.13895 | -0.75786 | 0.604534 | -1.25362 | 0.209979 | 0.301974 | 29.81475 | 16.96977 | 25.74206 | 13.39276 | 12.83466 | 16.07967 |
| 11241 | LOC103241 | 128.8468 | -0.75787 | 0.294592 | -2.57261 | 0.010094 | 0.023871 | 126.3061 | 216.2277 | 145.4079 | 89.28508 | 81.28621 | 114.5677 |
| 10274 | THBS2     | 123.3905 | -0.75824 | 0.271315 | -2.79469 | 0.005195 | 0.013443 | 126.3061 | 174.6244 | 163.4969 | 78.12444 | 113.3729 | 84.41828 |
| 3249  | PLCXD2    | 673.7391 | -0.75896 | 0.124421 | -6.0999  | 1.06E-09 | 8.68E-09 | 836.4393 | 874.7641 | 829.3118 | 491.0679 | 513.3866 | 497.4648 |
| 3041  | LOC103224 | 1309.52  | -0.75916 | 0.119557 | -6.3498  | 2.16E-10 | 1.88E-09 | 1652.821 | 1492.245 | 1790.117 | 1024.546 | 981.8518 | 915.5363 |
| 4228  | CDT1      | 1021.122 | -0.75936 | 0.146063 | -5.19881 | 2.01E-07 | 1.26E-06 | 1446.829 | 1065.263 | 1343.457 | 741.0662 | 708.0456 | 822.0732 |
| 3523  | LOC103225 | 1075.977 | -0.7595  | 0.130153 | -5.83541 | 5.37E-09 | 4.05E-08 | 1478.812 | 1227.845 | 1358.068 | 732.1376 | 778.6363 | 880.362  |
| 4189  | MIX23     | 977.7711 | -0.75953 | 0.145171 | -5.23195 | 1.68E-07 | 1.06E-06 | 1089.594 | 1429.292 | 1163.959 | 765.6196 | 767.9407 | 650.2217 |
| 10249 | LOC103216 | 129.4891 | -0.75966 | 0.271106 | -2.80206 | 0.005078 | 0.013171 | 190.2723 | 122.0728 | 176.02   | 89.28508 | 104.8164 | 94.46807 |
| 13749 | LOC119624 | 92.02434 | -0.75986 | 0.369169 | -2.05831 | 0.039561 | 0.076494 | 133.8953 | 63.49977 | 150.9737 | 55.80317 | 70.59065 | 77.38342 |
| 9334  | CHDH      | 135.1401 | -0.76008 | 0.251468 | -3.02256 | 0.002507 | 0.007139 | 187.5619 | 142.8745 | 179.4987 | 113.8385 | 85.56443 | 101.5029 |
| 4225  | LOC103216 | 672.9329 | -0.76022 | 0.146172 | -5.20087 | 1.98E-07 | 1.25E-06 | 804.4562 | 955.781  | 782.0021 | 504.4607 | 449.2132 | 541.6839 |
| 4328  | B3GNTL1   | 592.8223 | -0.76053 | 0.148187 | -5.13221 | 2.86E-07 | 1.76E-06 | 774.0993 | 645.3985 | 817.4844 | 421.872  | 459.9088 | 438.1971 |
| 3287  | RGS12     | 657.1281 | -0.76056 | 0.125662 | -6.05241 | 1.43E-09 | 1.15E-08 | 823.9713 | 823.3074 | 834.8776 | 466.5145 | 485.5781 | 508.5196 |
| 2974  | LOC103238 | 892.1016 | -0.76097 | 0.117783 | -6.4608  | 1.04E-10 | 9.31E-10 | 1057.611 | 1176.935 | 1132.651 | 656.2453 | 658.8461 | 670.3213 |
| 3301  | PPIH      | 1581.454 | -0.76112 | 0.125989 | -6.0412  | 1.53E-09 | 1.23E-08 | 1857.73  | 2265.737 | 1839.514 | 1272.312 | 1152.981 | 1100.453 |
| 2113  | DTL       | 2876.553 | -0.76114 | 0.097862 | -7.77764 | 7.39E-15 | 9.30E-14 | 3623.305 | 3816.008 | 3420.215 | 2113.824 | 2042.851 | 2243.114 |
| 3340  | HAUS1     | 846.2786 | -0.76123 | 0.126814 | -6.00275 | 1.94E-09 | 1.54E-08 | 1106.398 | 980.962  | 1110.387 | 582.5851 | 631.0376 | 666.3014 |
| 4874  | LOC103233 | 2275.636 | -0.7613  | 0.160036 | -4.75704 | 1.96E-06 | 1.07E-05 | 3251.976 | 2077.428 | 3258.806 | 1678.559 | 1685.619 | 1701.43  |
| 3015  | TMEM97    | 1788.251 | -0.76142 | 0.119046 | -6.39608 | 1.59E-10 | 1.41E-09 | 2107.632 | 2567.909 | 2072.584 | 1314.723 | 1339.083 | 1327.578 |
| 2889  | MMS19     | 3631.821 | -0.76145 | 0.116029 | -6.56258 | 5.29E-11 | 4.87E-10 | 4966.595 | 4329.48  | 4418.59  | 2665.16  | 2385.108 | 3025.993 |
| 10043 | KRT80     | 107.8243 | -0.76148 | 0.266997 | -2.85202 | 0.004344 | 0.0115   | 137.6899 | 122.0728 | 145.4079 | 82.5887  | 89.84265 | 69.34358 |
| 2811  | KPNA5     | 1062.215 | -0.76163 | 0.113954 | -6.68369 | 2.33E-11 | 2.20E-10 | 1295.044 | 1426.008 | 1285.712 | 792.4051 | 804.3056 | 769.8143 |
| 3179  | DIMT1     | 1737.552 | -0.76166 | 0.123101 | -6.18728 | 6.12E-10 | 5.12E-09 | 2024.693 | 2497.84  | 2032.927 | 1241.063 | 1377.587 | 1251.199 |
| 14198 | LOC119615 | 47.41506 | -0.76169 | 0.385205 | -1.97737 | 0.047999 | 0.089876 | 59.08741 | 52.55153 | 68.18167 | 31.24978 | 34.22577 | 39.1942  |
| 2660  | LAS1L     | 3360.648 | -0.76173 | 0.110723 | -6.8796  | 6.00E-12 | 6.00E-11 | 4086.247 | 4699.53  | 3903.749 | 2415.161 | 2365.856 | 2693.345 |
| 13195 | LOC103226 | 68.6395  | -0.76197 | 0.351127 | -2.17008 | 0.030001 | 0.060446 | 66.13454 | 112.7668 | 80.00911 | 51.33892 | 51.33866 | 50.24897 |
| 18322 | TNFAIP8L3 | 18.95829 | -0.76204 | 0.595676 | -1.27929 | 0.200794 | 0.291349 | 24.93597 | 27.37059 | 18.78475 | 15.62489 | 14.97377 | 12.05975 |
| 14576 | LOC103226 | 56.80607 | -0.76234 | 0.399059 | -1.91035 | 0.056088 | 0.102298 | 60.17159 | 99.62895 | 54.26705 | 51.33892 | 34.22577 | 41.20416 |
| 3252  | LOC119624 | 790.9903 | -0.76239 | 0.12503  | -6.09764 | 1.08E-09 | 8.80E-09 | 1042.974 | 988.6257 | 951.0648 | 569.1924 | 635.3159 | 558.7686 |
| 2120  | JADE1     | 9883.251 | -0.76265 | 0.098285 | -7.75954 | 8.52E-15 | 1.07E-13 | 12400.77 | 13478.37 | 11435.74 | 6935.219 | 7287.95  | 7761.456 |
| 2271  | MRT04     | 1659.198 | -0.76295 | 0.102244 | -7.46204 | 8.52E-14 | 9.97E-13 | 2190.029 | 1983.82  | 2092.064 | 1198.652 | 1236.406 | 1254.214 |
| 16069 | LOC103242 | 35.94585 | -0.76302 | 0.461633 | -1.65286 | 0.098358 | 0.162727 | 53.66655 | 38.86624 | 42.43961 | 20.08914 | 38.50399 | 22.10955 |
| 3477  | PTPN11    | 10272.55 | -0.76307 | 0.129772 | -5.88006 | 4.10E-09 | 3.14E-08 | 1155.37  | 15647.77 | 11581.14 | 7415.126 | 7198.107 | 8234.802 |
| 9945  | LOC119627 | 125.2632 | -0.76345 | 0.265427 | -2.8763  | 0.004024 | 0.010757 | 161.5417 | 166.9606 | 142.6249 | 78.12444 | 121.9293 | 80.39836 |
| 2151  | RNPS1     | 5542.193 | -0.76357 | 0.099431 | -7.67939 | 1.60E-14 | 1.98E-13 | 6719.703 | 7569.063 | 6643.539 | 4118.274 | 3843.982 | 4358.596 |
| 8937  | ARRB2     | 178.5159 | -0.76372 | 0.24361  | -3.13502 | 0.001718 | 0.005112 | 178.8885 | 270.9688 | 226.1127 | 136.1597 | 111.2338 | 147.732  |
| 8137  | LOC103233 | 159.0911 | -0.76386 | 0.2268   | -3.36799 | 0.000757 | 0.002474 | 214.6662 | 183.9304 | 204.545  | 116.0706 | 102.6773 | 132.6573 |
| 16024 | LOC103238 | 32.22661 | -0.76403 | 0.459793 | -1.66169 | 0.096575 | 0.160225 | 38.48813 | 42.15071 | 40.35242 | 22.32127 | 29.94755 | 20.09959 |
| 19007 | LOC119618 | 16.7745  | -0.76421 | 0.645575 | -1.18377 | 0.236504 | 0.330797 | 27.6464  | 16.96977 | 18.78475 | 15.62489 | 8.556443 | 13.06473 |
| 1961  | ORC2      | 2661.804 | -0.76449 | 0.094763 | -8.06744 | 7.18E-16 | 9.73E-15 | 3324.074 | 3523.69  | 3202.451 | 1962.04  | 2030.016 | 1928.556 |
| 15772 | LOC103227 | 42.10487 | -0.76453 | 0.448058 | -1.70631 | 0.087951 | 0.148248 | 48.24569 | 43.24553 | 66.09448 | 29.01765 | 44.92132 | 21.10457 |
| 2273  | NCEH1     | 1499.568 | -0.76476 | 0.10254  | -7.45821 | 8.77E-14 | 1.03E-12 | 1858.814 | 1955.355 | 1853.428 | 1095.974 | 1078.112 | 1155.726 |
| 4906  | TJP1      | 10301.38 | -0.76489 | 0.161363 | -4.7402  | 2.14E-06 | 1.16E-05 | 10830.34 | 17275.22 | 10806.1  | 7535.661 | 7287.95  | 8073     |
| 14061 | LOC119627 | 62.85871 | -0.76497 | 0.382171 | -2.00163 | 0.045324 | 0.085694 | 61.25576 | 103.4608 | 73.05179 | 31.24978 | 59.8951  | 48.23901 |
| 23477 | LOC119627 | 2.822065 | -0.76514 | 1.568717 | -0.48775 | 0.62573  | 0.708506 | 5.420864 | 3.831883 | 1.391463 | 0        | 4.278221 | 2.009959 |
| 3654  | OBSCN     | 1089.047 | -0.76538 | 0.134405 | -5.69455 | 1.24E-08 | 9.00E-08 | 1472.307 | 1188.978 | 1458.253 | 761.1553 | 772.219  | 881.367  |
| 2576  | RCC2      | 6796.94  | -0.7655  | 0.109128 | -7.0147  | 2.30E-12 | 2.38E-11 | 8280.369 | 9364.026 | 8041.959 | 4859.34  | 4631.175 | 5604.77  |
| 13367 | LOC119615 | 59.94085 | -0.76592 | 0.359014 | -2.13339 | 0.032893 | 0.065419 | 86.73382 | 62.40495 | 75.83472 | 53.57105 | 44.      |          |



|       |           |          |          |          |          |          |          |          |          |          |          |          |          |
|-------|-----------|----------|----------|----------|----------|----------|----------|----------|----------|----------|----------|----------|----------|
| 16817 | LOC103234 | 28.45175 | -0.76739 | 0.504049 | -1.52246 | 0.127894 | 0.20218  | 30.89892 | 44.34036 | 31.30791 | 24.5534  | 23.53022 | 16.07967 |
| 3329  | ATP23     | 833.0042 | -0.76751 | 0.127558 | -6.01695 | 1.78E-09 | 1.42E-08 | 1099.893 | 1080.591 | 968.4581 | 656.2453 | 564.7252 | 628.1122 |
| 2644  | NFE2L1    | 20203.6  | -0.76754 | 0.111036 | -6.91254 | 4.76E-12 | 4.79E-11 | 24062.67 | 28977.79 | 23329.96 | 14734.27 | 13910.64 | 16206.3  |
| 2610  | MAP2K5    | 1920.419 | -0.76765 | 0.110245 | -6.9631  | 3.33E-12 | 3.39E-11 | 2298.446 | 2649.473 | 2305.654 | 1482.132 | 1448.178 | 1338.633 |
| 8812  | LOC119626 | 152.8241 | -0.76772 | 0.242051 | -3.17175 | 0.001515 | 0.004571 | 224.9658 | 159.8442 | 194.1091 | 111.6063 | 104.8164 | 121.6025 |
| 5260  | ZFAND4    | 410.8629 | -0.76783 | 0.168833 | -4.54787 | 5.42E-06 | 2.74E-05 | 480.8306 | 569.3083 | 502.318  | 261.1589 | 355.0924 | 296.4689 |
| 4160  | LRR1      | 439.647  | -0.76805 | 0.146285 | -5.25036 | 1.52E-07 | 9.70E-07 | 573.5274 | 539.748  | 551.0192 | 301.3371 | 331.5622 | 340.688  |
| 14201 | TRNAS-GC1 | 78.72768 | -0.76808 | 0.388517 | -1.97695 | 0.048047 | 0.089947 | 128.4745 | 56.93083 | 114.0999 | 53.57105 | 44.92132 | 74.36848 |
| 17922 | LOC103226 | 21.16572 | -0.76818 | 0.566149 | -1.35685 | 0.17483  | 0.259337 | 29.27266 | 21.34906 | 29.91645 | 13.39276 | 14.97377 | 18.08963 |
| 5636  | HIST4H4   | 5191.606 | -0.76821 | 0.176349 | -4.35619 | 1.32E-05 | 6.24E-05 | 7432.546 | 4334.407 | 7859.677 | 3908.454 | 3775.53  | 3839.022 |
| 2628  | TIPIN     | 1695.134 | -0.76854 | 0.110837 | -6.934   | 4.09E-12 | 4.14E-11 | 2077.275 | 2305.151 | 2025.97  | 1171.867 | 1343.361 | 1247.18  |
| 7613  | LOC103235 | 214.3166 | -0.76869 | 0.218286 | -3.5215  | 0.000429 | 0.001498 | 248.2756 | 319.1411 | 242.8102 | 133.9276 | 183.9635 | 157.7818 |
| 3451  | PAPOLA    | 9602.19  | -0.76874 | 0.130293 | -5.90005 | 3.63E-09 | 2.80E-08 | 10475.82 | 14763.7  | 11067.69 | 6986.557 | 6881.519 | 7437.853 |
| 7157  | PIDD1     | 413.266  | -0.76901 | 0.209081 | -3.67803 | 0.000235 | 0.000873 | 578.9482 | 397.421  | 590.6759 | 308.0335 | 241.7195 | 362.7976 |
| 4068  | FANCA     | 1962.725 | -0.76944 | 0.144644 | -5.31953 | 1.04E-07 | 6.80E-07 | 2875.768 | 2036.372 | 2515.765 | 1417.401 | 1306.997 | 1624.047 |
| 12713 | ATP13A4   | 117.1868 | -0.76955 | 0.341221 | -2.25529 | 0.024115 | 0.050429 | 154.4946 | 139.0426 | 145.4079 | 93.74933 | 126.2075 | 44.2191  |
| 10275 | LOC119626 | 101.4722 | -0.76958 | 0.275398 | -2.79441 | 0.005199 | 0.013453 | 136.6058 | 108.935  | 137.7548 | 82.5887  | 70.59065 | 72.35852 |
| 5998  | LOC119623 | 290.5711 | -0.76959 | 0.184789 | -4.16468 | 3.12E-05 | 0.000138 | 352.3561 | 420.9597 | 325.6023 | 223.2127 | 203.2155 | 218.0805 |
| 4184  | HOOK1     | 1258.38  | -0.7696  | 0.146955 | -5.23697 | 1.63E-07 | 1.04E-06 | 1464.175 | 1924.7   | 1371.287 | 946.4218 | 874.8963 | 968.8002 |
| 20145 | LOC119626 | 185.1797 | -0.76983 | 0.766501 | -1.00435 | 0.315212 | 0.41598  | 366.9925 | 54.19377 | 279.684  | 133.9276 | 98.39909 | 177.8814 |
| 22426 | LOC119623 | 4.67513  | -0.76994 | 1.180448 | -0.65225 | 0.514243 | 0.609584 | 7.047123 | 5.474118 | 4.87012  | 2.232127 | 6.417332 | 2.009959 |
| 13157 | MEGF10    | 65.18263 | -0.77032 | 0.353489 | -2.17919 | 0.029318 | 0.059239 | 66.13454 | 95.79707 | 82.79203 | 53.57105 | 55.61688 | 37.18424 |
| 3315  | LOC103226 | 4745.714 | -0.77061 | 0.1278   | -6.02982 | 1.64E-09 | 1.32E-08 | 6558.161 | 4920.685 | 6478.651 | 3334.798 | 3369.099 | 3812.892 |
| 9071  | CUNH3orf1 | 116.93   | -0.77063 | 0.249375 | -3.09026 | 0.002    | 0.00586  | 151.7842 | 144.5167 | 144.7121 | 87.05295 | 94.12087 | 79.39338 |
| 10891 | LOC103218 | 119.0169 | -0.7707  | 0.290569 | -2.65237 | 0.007993 | 0.019511 | 152.8684 | 112.2194 | 187.1517 | 73.66019 | 87.70354 | 100.4979 |
| 25090 | LOC103235 | 0.90393  | -0.77122 | 3.320152 | -0.23228 | 0.816318 | 0.864998 | 0        | 3.284471 | 0        | 0        | 2.139111 | 0        |
| 4557  | RHBDL3    | 472.4818 | -0.77127 | 0.155221 | -4.96886 | 6.73E-07 | 3.93E-06 | 590.3321 | 606.5323 | 594.8503 | 287.9444 | 374.3444 | 380.8872 |
| 12242 | LOC119615 | 69.52594 | -0.77129 | 0.327082 | -2.3581  | 0.018369 | 0.039892 | 89.44425 | 72.80577 | 100.881  | 53.57105 | 49.19955 | 51.25395 |
| 6416  | LOC119623 | 236.1891 | -0.77133 | 0.194121 | -3.97348 | 7.08E-05 | 0.000293 | 314.9522 | 267.137  | 313.0791 | 183.0344 | 154.016  | 184.9162 |
| 4577  | LSM11     | 358.2881 | -0.77143 | 0.155721 | -4.95394 | 7.27E-07 | 4.22E-06 | 450.4738 | 455.994  | 451.5297 | 258.9267 | 252.4151 | 280.3893 |
| 2902  | PPWD1     | 1569.714 | -0.77204 | 0.117956 | -6.54518 | 5.94E-11 | 5.44E-10 | 1850.683 | 2172.13  | 1922.306 | 1160.706 | 1065.277 | 1247.18  |
| 5800  | LOC103235 | 334.8422 | -0.7721  | 0.180687 | -4.27313 | 1.93E-05 | 8.83E-05 | 475.4097 | 353.0806 | 438.3108 | 247.7661 | 250.2759 | 244.21   |
| 5698  | MFSD10    | 1345.371 | -0.77227 | 0.178457 | -4.32747 | 1.51E-05 | 7.04E-05 | 1963.437 | 1195     | 1934.829 | 1033.475 | 896.2874 | 1049.199 |
| 15887 | LOC119623 | 40.27811 | -0.7724  | 0.457939 | -1.68669 | 0.091663 | 0.153387 | 48.78777 | 43.24553 | 62.61582 | 24.5534  | 19.252   | 43.21412 |
| 1868  | BRD9      | 2218.785 | -0.77252 | 0.093561 | -8.25685 | 1.50E-16 | 2.13E-15 | 2842.701 | 2823.003 | 2733.529 | 1656.238 | 1582.942 | 1674.296 |
| 2887  | CDK2AP1   | 4164.139 | -0.77259 | 0.117702 | -6.56397 | 5.24E-11 | 4.82E-10 | 4880.404 | 6110.211 | 4772.021 | 2968.729 | 3037.537 | 3215.934 |
| 11250 | LOC119626 | 85.03259 | -0.77263 | 0.300605 | -2.57024 | 0.010163 | 0.024014 | 123.0536 | 90.32295 | 109.2298 | 62.49956 | 57.75599 | 67.33362 |
| 4515  | INPP4B    | 442.3879 | -0.77269 | 0.154433 | -5.00342 | 5.63E-07 | 3.32E-06 | 550.2177 | 592.2996 | 527.3644 | 363.8367 | 325.1448 | 295.464  |
| 3740  | SMC1A     | 7202.531 | -0.77283 | 0.137903 | -5.60416 | 2.09E-08 | 1.49E-07 | 8000.653 | 11317.19 | 7943.861 | 5399.515 | 5054.719 | 5499.248 |
| 19152 | LOC119626 | 15.70389 | -0.77318 | 0.666507 | -1.16005 | 0.246027 | 0.341511 | 24.39389 | 13.6853  | 20.87194 | 13.39276 | 12.83466 | 9.044815 |
| 24914 | DYNLT4    | 0.911575 | -0.77347 | 2.955326 | -0.26172 | 0.793537 | 0.846727 | 0        | 0.547412 | 2.782925 | 0        | 2.139111 | 0        |
| 24627 | LOC119623 | 1.494872 | -0.77405 | 2.48433  | -0.31157 | 0.755364 | 0.81542  | 1.084173 | 0        | 4.87012  | 0        | 0        | 3.014938 |
| 8834  | LOC119623 | 134.0193 | -0.77429 | 0.244863 | -3.16215 | 0.001566 | 0.004713 | 182.141  | 179.0037 | 146.1036 | 89.28508 | 109.0946 | 98.48799 |
| 1664  | ECHDC1    | 5793.283 | -0.77437 | 0.087933 | -8.80641 | 1.29E-18 | 2.06E-17 | 7586.499 | 7278.935 | 7075.588 | 4256.666 | 4087.84  | 4474.169 |
| 2158  | PSMG3     | 1740.173 | -0.77438 | 0.100944 | -7.67142 | 1.70E-14 | 2.10E-13 | 2259.958 | 2252.052 | 2078.845 | 1279.009 | 1255.658 | 1315.518 |
| 19649 | LOC103235 | 14.30687 | -0.77442 | 0.718534 | -1.07778 | 0.281132 | 0.380371 | 26.02015 | 13.6853  | 13.91463 | 15.62489 | 8.556443 | 8.039836 |
| 10605 | FANCF     | 110.5591 | -0.77452 | 0.28471  | -2.72037 | 0.006521 | 0.016347 | 166.9626 | 113.3142 | 138.4505 | 66.96381 | 96.25998 | 81.40334 |
| 23573 | LOC119623 | 2.355457 | -0.77471 | 1.637266 | -0.47317 | 0.636091 | 0.717348 | 4.878777 | 1.094824 | 2.782925 | 2.232127 | 2.139111 | 1.004979 |
| 3509  | TLK2      | 3651.147 | -0.77488 | 0.132499 | -5.84817 | 4.97E-09 | 3.77E-08 | 4164.85  | 5581.411 | 4082.552 | 2555.785 | 2695.279 | 2827.007 |
| 14362 | LOC103215 | 49.91318 | -0.77543 | 0.397752 | -1.94953 | 0.051232 | 0.094883 | 60.17159 | 72.80577 | 57.04997 | 22.32127 | 44.92132 | 42.20914 |
| 2342  | MRPS6     | 1596.548 | -0.77543 | 0.105484 | -7.35123 | 1.96E-13 | 2.23E-12 | 1948.258 | 2040.204 | 2053.799 | 1154.01  | 1268.493 | 1114.522 |
| 3121  | UCN2      | 834.5988 | -0.77551 | 0.12403  | -6.25261 | 4.04E-10 | 3.44E-09 | 1003.944 | 1139.164 | 1017.159 | 640.6204 | 594.6728 | 612.0325 |
| 6825  | LOC103247 | 449.7382 | -0.77562 | 0.203632 | -3.80893 | 0.00014  | 0.000544 | 679.7763 | 406.727  | 618.5052 | 303.5693 | 340.1186 | 349.7329 |
| 11851 | LOC103247 | 97.12261 | -0.77563 | 0.31842  | -2.43588 | 0.014856 | 0.033325 | 131.727  | 85.94365 | 151.6694 | 60.26743 | 72.72976 | 80.39836 |
| 12648 | LOC103247 | 82.79871 | -0.77577 | 0.341558 | -2.27125 | 0.023132 | 0.048621 | 109.5014 | 105.6505 | 101.5768 | 33.4819  | 64.1732  | 82.40832 |
| 4786  | LOC103245 | 749.3986 | -0.77653 | 0.161055 | -4.82148 | 1.42E-06 | 7.92E-06 | 782.7727 | 1092.087 | 960.1093 | 622.7634 | 541.195  | 497.4648 |
| 2246  | TARS1     | 10828.12 | -0.77666 | 0.103315 | -7.51739 | 5.59E-14 | 6.61E-13 | 13012.78 | 15475.88 | 12534.3  | 8080.3   | 7820.589 | 8044.861 |
| 19928 | LOC103245 | 16.05881 | -0.77683 | 0.745364 | -1.04221 | 0.297314 | 0.396633 | 28.73058 | 10.40082 | 20.87194 | 8.928508 | 21.39111 | 6.029877 |
| 3399  | KLF12     | 1499.368 | -0.77693 | 0.130665 | -5.94597 | 2.75E-09 | 2.15E-08 | 1724.377 | 2193.479 | 1764.375 | 1156.242 | 1016.078 | 1141.657 |
| 6262  | DLX1      | 262.2621 | -0.77704 | 0.192114 | -4.0447  | 5.24E-05 | 0.000222 | 302.4842 | 375.5245 | 317.9492 | 169.6417 | 198.9373 | 209.0357 |
| 18564 | EDN2      | 19.3481  | -0.77711 | 0.626205 | -1.24098 | 0.214614 | 0.307342 | 23.8518  | 22.44388 | 25.74206 | 15.62489 | 21.39111 | 7.034856 |
| 3893  | SYT14     | 1768.967 | -0.77722 | 0.142612 | -5.4499  | 5.04E-08 | 3.44E-07 | 1974.279 | 2712.426 | 2012.751 | 1290.169 | 1401.117 | 1223.06  |
| 19565 | TRNAH-GU  | 20.8199  | -0.7774  | 0.713644 | -1.08934 | 0.276004 | 0.375035 | 40.11439 | 8.211177 | 31.30791 | 15.62489 | 8.556443 | 21.10457 |
| 1816  | FBXL5     | 3670.799 | -0.77773 | 0.092402 | -8.41681 | 3.87E-17 | 5.66E-16 | 4722.114 | 4497.535 | 4683.664 | 2785.694 | 2802.235 | 2533.553 |
| 3610  | POLR1C    | 1835.201 | -0.77773 | 0.135756 | -5.72887 | 1.01E-08 | 7.45E-08 | 2581.957 | 1904.446 | 2471.934 | 1352.669 | 1262.075 | 1438.126 |
| 1803  | IPO11     | 4048.753 | -0.77803 | 0.092212 | -8.43735 | 3.25E-17 | 4.79E-16 | 5258.78  | 5103.52  | 4989.785 | 2906.229 | 2851.435 | 3182.77  |
| 2998  | ALG13     | 890.5531 | -0.77804 | 0.12122  | -6.4184  | 1.38E-10 | 1.22E-09 | 1075.499 | 1215.802 | 1082.558 | 674.1023 | 648.1505 | 647.2068 |
| 10897 | ZNF772    | 86.76753 | -0.7781  | 0.293511 | -2.65102 | 0.008025 | 0.019578 | 100.286  | 119.3358 | 109.2298 | 53.57105 | 74.86887 | 63.31371 |
| 24876 | LOC103244 | 0.91677  | -0.7784  | 2.882646 | -0.27003 | 0.787137 | 0.841214 | 1.626259 | 1.642235 | 0        | 2.232127 | 0        | 0        |
| 3521  | LSM12     | 3660.334 | -0.77859 | 0.133351 | -5.83867 | 5.26E-09 | 3.97E-08 | 4119.856 | 5649.837 | 4103.424 | 2694.177 | 2729.505 | 2665.206 |
| 3061  | LETMD1    | 2077.066 | -0.77905 | 0.123277 | -6.31947 | 2.62E-10 | 2.28E-09 | 2920.219 | 2387.263 | 2573.51  | 149      |          |          |



|       |           |          |          |          |          |          |          |          |          |          |          |          |          |
|-------|-----------|----------|----------|----------|----------|----------|----------|----------|----------|----------|----------|----------|----------|
| 9895  | LOC103234 | 108.2242 | -0.77932 | 0.27004  | -2.88593 | 0.003903 | 0.010485 | 123.0536 | 156.5598 | 129.406  | 78.12444 | 89.84265 | 72.35852 |
| 4211  | PPP1R3F   | 427.1823 | -0.77948 | 0.149636 | -5.20914 | 1.90E-07 | 1.20E-06 | 541.5443 | 506.9033 | 573.2826 | 303.5693 | 310.171  | 327.6233 |
| 6790  | LOC103217 | 426.744  | -0.77951 | 0.203974 | -3.8216  | 0.000133 | 0.000519 | 404.9385 | 666.7476 | 543.3662 | 350.4439 | 316.5884 | 278.3793 |
| 1876  | ANXA1     | 24146.48 | -0.77964 | 0.094643 | -8.23764 | 1.76E-16 | 2.49E-15 | 31960.87 | 27370.59 | 32215.84 | 17912.82 | 18113.99 | 17304.74 |
| 23107 | TRNAY-GU  | 3.360372 | -0.77982 | 1.436989 | -0.54268 | 0.587351 | 0.675758 | 6.505036 | 2.189647 | 4.174388 | 0        | 4.278221 | 3.014938 |
| 27795 | LOC119627 | 0.671338 | -0.77997 | 2.872186 | -0.27156 | 0.785961 | NA       | 1.084173 | 0.547412 | 1.391463 | 0        | 0        | 1.004979 |
| 2506  | SLC6A6    | 17402.66 | -0.7801  | 0.109511 | -7.12348 | 1.05E-12 | 1.12E-11 | 20567.84 | 24482.99 | 20947.08 | 12406.16 | 11801.47 | 14210.41 |
| 1991  | PIGN      | 3513.982 | -0.78031 | 0.097369 | -8.01399 | 1.11E-15 | 1.48E-14 | 4715.067 | 4220.545 | 4396.327 | 2511.143 | 2494.203 | 2746.609 |
| 13573 | PAX9      | 49.21367 | -0.78034 | 0.372715 | -2.09367 | 0.036289 | 0.071078 | 61.79785 | 61.85754 | 63.31155 | 40.17829 | 29.94755 | 38.18922 |
| 16364 | NRGN      | 39.55468 | -0.78088 | 0.48968  | -1.59467 | 0.110786 | 0.179973 | 30.89892 | 63.49977 | 54.26705 | 26.78552 | 42.78221 | 19.09461 |
| 14374 | LOC119629 | 42.56908 | -0.78103 | 0.400797 | -1.94869 | 0.051333 | 0.094941 | 50.41403 | 55.28859 | 54.96278 | 31.24978 | 36.36488 | 27.13445 |
| 1643  | CCT5      | 17836.4  | -0.78112 | 0.088088 | -8.86758 | 7.48E-19 | 1.21E-17 | 21839.03 | 24374.61 | 21436.18 | 12968.66 | 13384.42 | 13015.49 |
| 4140  | PGS1      | 1463.551 | -0.78124 | 0.148403 | -5.26431 | 1.41E-07 | 9.04E-07 | 2043.124 | 1562.313 | 1953.614 | 1031.243 | 934.7914 | 1256.224 |
| 16577 | LOC103236 | 31.79715 | -0.78131 | 0.50055  | -1.5609  | 0.118546 | 0.190116 | 52.04029 | 27.918   | 40.35242 | 31.24978 | 17.11289 | 22.10955 |
| 22680 | LOC119627 | 4.186263 | -0.78143 | 1.280136 | -0.61043 | 0.541579 | 0.634821 | 5.96295  | 6.02153  | 3.478657 | 2.232127 | 6.417332 | 1.004979 |
| 5541  | RPS15     | 23430    | -0.78164 | 0.177814 | -4.39584 | 1.10E-05 | 5.29E-05 | 34492.96 | 19242.62 | 35144.87 | 17490.95 | 16280.77 | 17927.83 |
| 3074  | MRPS18B   | 926.6581 | -0.78172 | 0.123956 | -6.30642 | 2.86E-10 | 2.47E-09 | 1156.27  | 1161.06  | 1203.615 | 691.9594 | 605.3683 | 741.6748 |
| 4444  | ZC3H6     | 1501.507 | -0.7818  | 0.154883 | -5.04768 | 4.47E-07 | 2.68E-06 | 1669.626 | 2382.336 | 1644.013 | 1033.475 | 1170.094 | 1109.497 |
| 2068  | RUVBL2    | 4101.618 | -0.78196 | 0.099588 | -7.852   | 4.09E-15 | 5.26E-14 | 5387.796 | 4746.608 | 5429.488 | 3080.335 | 2845.017 | 3120.461 |
| 2583  | LOC103217 | 30384.11 | -0.78267 | 0.111691 | -7.00746 | 2.43E-12 | 2.50E-11 | 36056.87 | 43529.09 | 35710.5  | 21673.95 | 20700.17 | 24634.06 |
| 4501  | RPL10A    | 20990.2  | -0.78305 | 0.156282 | -5.01046 | 5.43E-07 | 3.21E-06 | 29997.98 | 18819.47 | 30836.21 | 15399.44 | 15097.84 | 15790.24 |
| 22412 | LOC103236 | 4.307188 | -0.78318 | 1.196496 | -0.65456 | 0.512748 | 0.608191 | 4.878777 | 6.568942 | 4.87012  | 2.232127 | 4.278221 | 3.014938 |
| 2590  | LOC103248 | 1140.7   | -0.78326 | 0.111986 | -6.99422 | 2.67E-12 | 2.74E-11 | 1532.478 | 1382.762 | 1410.943 | 848.2083 | 857.7834 | 812.0234 |
| 3977  | P2RY11    | 479.2084 | -0.7834  | 0.145322 | -5.39076 | 7.02E-08 | 4.69E-07 | 595.7529 | 641.0192 | 585.1101 | 348.2118 | 327.2839 | 377.8723 |
| 9150  | FOXO6     | 171.0548 | -0.78349 | 0.255496 | -3.06656 | 0.002165 | 0.006291 | 179.4306 | 280.8223 | 187.1517 | 129.4634 | 136.9031 | 112.5577 |
| 22428 | TRNAA-AG  | 4.308075 | -0.78354 | 1.201894 | -0.65192 | 0.514454 | 0.609807 | 4.336691 | 7.116354 | 4.87012  | 2.232127 | 4.278221 | 3.014938 |
| 17174 | LOC119627 | 23.17498 | -0.78363 | 0.532495 | -1.47163 | 0.141121 | 0.218452 | 31.9831  | 29.01283 | 27.13352 | 17.85702 | 14.97377 | 18.08963 |
| 11270 | LOC103247 | 139.3467 | -0.78365 | 0.305452 | -2.56554 | 0.010301 | 0.0243   | 133.8953 | 251.262  | 143.3207 | 120.5349 | 85.56443 | 101.5029 |
| 17325 | TRNAS-CG  | 25.49485 | -0.78366 | 0.542626 | -1.44419 | 0.148685 | 0.228155 | 34.69353 | 20.80165 | 41.04815 | 20.08914 | 19.252   | 17.08465 |
| 20235 | TRNAG-GC  | 14.95892 | -0.78403 | 0.791988 | -0.98995 | 0.322197 | 0.423306 | 25.47806 | 4.926706 | 26.43779 | 11.16063 | 10.69555 | 11.05477 |
| 2039  | SRSF7     | 6477.39  | -0.7842  | 0.099312 | -7.89628 | 2.87E-15 | 3.75E-14 | 8656.035 | 7421.262 | 8515.056 | 4502.2   | 4800.164 | 4969.623 |
| 6757  | ANAPC11   | 1127.68  | -0.78423 | 0.204621 | -3.83258 | 0.000127 | 0.000499 | 1740.097 | 907.0614 | 1635.664 | 814.7263 | 770.0798 | 898.4516 |
| 10570 | LOC103214 | 165.785  | -0.78437 | 0.287454 | -2.72868 | 0.006359 | 0.015992 | 158.2892 | 298.8869 | 173.2371 | 120.5349 | 109.0946 | 134.6672 |
| 2133  | UTP15     | 2067.544 | -0.78442 | 0.101523 | -7.72655 | 1.11E-14 | 3.18E-13 | 2591.173 | 2763.882 | 2497.676 | 1515.614 | 1446.039 | 1590.883 |
| 5801  | TEAD3     | 264.961  | -0.78444 | 0.183605 | -4.27242 | 1.93E-05 | 8.86E-05 | 309.5313 | 365.6711 | 332.5596 | 196.4272 | 177.5462 | 208.0308 |
| 20474 | LOC119629 | 5.989875 | -0.7845  | 0.825281 | -0.95058 | 0.341818 | 0.443821 | 15.17842 | 9.853413 | 11.1317  | 8.928508 | 6.417332 | 6.029877 |
| 17393 | MC3R      | 27.55577 | -0.7847  | 0.548573 | -1.43044 | 0.15259  | 0.233236 | 28.73058 | 45.98259 | 28.52499 | 20.08914 | 29.94755 | 12.05975 |
| 11226 | SFMBT2    | 82.38234 | -0.78472 | 0.304769 | -2.57482 | 0.010029 | 0.023749 | 102.9964 | 98.53413 | 109.9256 | 53.57105 | 77.00798 | 52.25893 |
| 22651 | LOC103247 | 3.79947  | -0.78532 | 1.276075 | -0.61542 | 0.538279 | 0.631778 | 4.878777 | 3.831883 | 5.565851 | 2.232127 | 4.278221 | 2.009959 |
| 1982  | RANBP1    | 6329.487 | -0.78576 | 0.097865 | -8.02899 | 9.83E-16 | 1.32E-14 | 7434.172 | 8839.059 | 7760.883 | 4723.181 | 4609.873 | 4609.841 |
| 13724 | LOC103236 | 50.80687 | -0.7858  | 0.380391 | -2.06577 | 0.03885  | 0.075257 | 60.17159 | 55.28859 | 77.92191 | 40.17829 | 32.08666 | 39.1942  |
| 4495  | UBE2T     | 513.0043 | -0.78594 | 0.156768 | -5.01341 | 5.35E-07 | 3.16E-06 | 697.6652 | 554.5282 | 695.0356 | 363.8367 | 402.1528 | 364.8075 |
| 2803  | JAM3      | 1883.076 | -0.78653 | 0.117607 | -6.68782 | 2.27E-11 | 2.15E-10 | 2539.675 | 2152.971 | 2465.672 | 1383.919 | 1257.797 | 1498.424 |
| 19930 | RAET1E    | 12.8128  | -0.78687 | 0.755092 | -1.04209 | 0.29737  | 0.396667 | 19.51511 | 10.94824 | 17.39328 | 11.16063 | 12.83466 | 5.024897 |
| 19148 | SLC25A53  | 14.82073 | -0.78702 | 0.677838 | -1.16107 | 0.245613 | 0.341008 | 18.43094 | 23.53871 | 13.91463 | 11.16063 | 12.83466 | 9.044815 |
| 2843  | RPS24     | 54815.92 | -0.78708 | 0.118868 | -6.62143 | 3.56E-11 | 3.33E-10 | 63510.3  | 70772.68 | 73931.2  | 41872.47 | 44998.33 | 33810.52 |
| 3485  | LOC103245 | 927.7775 | -0.78719 | 0.13409  | -5.87062 | 4.34E-09 | 3.31E-08 | 1080.92  | 1347.728 | 1096.473 | 678.5666 | 669.5416 | 693.4358 |
| 3333  | THNSL2    | 3267.978 | -0.78726 | 0.131015 | -6.00893 | 1.87E-09 | 1.49E-08 | 4587.677 | 3637.004 | 4199.435 | 2229.895 | 2169.058 | 2784.798 |
| 15025 | SLC7A9    | 38.72565 | -0.7875  | 0.430627 | -1.82873 | 0.06744  | 0.119328 | 51.49821 | 45.98259 | 48.7012  | 24.5534  | 38.50399 | 23.11453 |
| 2302  | IRS2      | 1558.608 | -0.78782 | 0.106329 | -7.40927 | 1.27E-13 | 1.47E-12 | 1949.343 | 2086.186 | 1890.302 | 1133.921 | 1090.946 | 1200.95  |
| 3605  | LOC103225 | 783.4562 | -0.78798 | 0.137432 | -5.73356 | 9.83E-09 | 7.25E-08 | 989.3076 | 1093.181 | 894.7105 | 522.3177 | 620.3421 | 580.8781 |
| 3714  | LOC119629 | 739.8082 | -0.78803 | 0.13992  | -5.63197 | 1.78E-08 | 1.28E-07 | 871.6749 | 997.9317 | 947.5861 | 533.4783 | 479.1608 | 609.0176 |
| 26590 | TRNAN-GL  | 0.673113 | -0.78815 | 3.210285 | -0.24551 | 0.806064 | NA       | 0        | 1.642235 | 1.391463 | 0        | 0        | 1.004979 |
| 1999  | LARS1     | 14489.42 | -0.7882  | 0.098543 | -7.99855 | 1.26E-15 | 1.67E-14 | 17902.4  | 20203.88 | 16954.97 | 10292.34 | 10336.18 | 11246.73 |
| 2653  | NPM1      | 58829.56 | -0.78875 | 0.114458 | -6.89112 | 5.54E-12 | 5.55E-11 | 66863.1  | 85521.05 | 71175.41 | 43678.26 | 46418.7  | 39320.83 |
| 2368  | MYO1E     | 5695.094 | -0.78891 | 0.107899 | -7.31333 | 2.61E-13 | 2.93E-12 | 6851.43  | 8100.6   | 6698.502 | 3986.579 | 4064.31  | 4469.144 |
| 2521  | TCF3      | 2951.819 | -0.78926 | 0.1112   | -7.09766 | 1.27E-12 | 1.34E-11 | 3867.244 | 3473.875 | 3880.094 | 2350.43  | 1910.226 | 2229.044 |
| 4205  | MND1      | 491.0121 | -0.78938 | 0.151396 | -5.21398 | 1.85E-07 | 1.17E-06 | 582.7428 | 668.3898 | 610.8521 | 361.6046 | 397.8746 | 324.6084 |
| 5479  | ICA1      | 264.6267 | -0.78953 | 0.178608 | -4.42048 | 9.85E-06 | 4.78E-05 | 326.336  | 362.934  | 317.2535 | 189.7308 | 192.52   | 198.9859 |
| 2796  | FAM234B   | 1032.753 | -0.78957 | 0.117802 | -6.70251 | 2.05E-11 | 1.95E-10 | 1317.27  | 1363.603 | 1250.229 | 723.2091 | 725.1585 | 817.0483 |
| 12643 | LOC119629 | 59.22149 | -0.78991 | 0.347654 | -2.27211 | 0.02308  | 0.048531 | 78.60252 | 67.87906 | 80.00911 | 37.94616 | 40.6431  | 50.24897 |
| 2183  | SLC35B4   | 1784.368 | -0.79017 | 0.103379 | -7.6434  | 2.12E-14 | 2.58E-13 | 2262.669 | 2370.841 | 2151.897 | 1232.134 | 1354.057 | 1334.613 |
| 2088  | DARS2     | 2104.127 | -0.79023 | 0.10115  | -7.81245 | 5.61E-15 | 7.14E-14 | 2626.408 | 2807.675 | 2570.727 | 1504.454 | 1482.404 | 1633.092 |
| 3596  | LOC103216 | 624.3933 | -0.79033 | 0.137481 | -5.74866 | 9.00E-09 | 6.65E-08 | 821.8029 | 737.3637 | 809.8313 | 482.1394 | 479.1608 | 416.0615 |
| 24536 | LOC119628 | 1.086933 | -0.79033 | 2.431306 | -0.32507 | 0.745132 | 0.807358 | 1.626259 | 2.189647 | 0.695731 | 0        | 0        | 2.009959 |
| 2299  | CNDP2     | 2450.006 | -0.79046 | 0.106577 | -7.41679 | 1.20E-13 | 1.39E-12 | 3286.67  | 2966.972 | 3069.567 | 1671.863 | 1741.236 | 1963.73  |
| 3491  | RPLP2     | 8854.894 | -0.79076 | 0.134821 | -5.86525 | 4.48E-09 | 3.42E-08 | 12663.14 | 8889.42  | 12118.25 | 6727.631 | 5923.197 | 6807.731 |
| 2717  | ZNF22     | 1539.597 | -0.79082 | 0.116007 | -6.81702 | 9.30E-12 | 9.09E-11 | 1862.067 | 2148.044 | 1842.992 | 1062.492 | 1206.458 | 1115.527 |
| 1399  | CCT6A     | 23035.5  | -0.79104 | 0.083009 | -9.52955 | 1.58E-21 | 3.00E-20 | 30298.29 | 28202.11 | 29098.27 | 16613.72 | 16297.88 | 17702.71 |
| 10815 | LOC103225 | 81.72215 | -0.79104 | 0.296636 | -2.6667  | 0.00766  | 0.018829 | 99.74389 | 104.5557 | 105.0554 | 60.26743 | 68.45154 | 52.25893 |
| 20950 | LOC119627 | 10.12291 | -0.79106 | 0.893888 | -0.88496 | 0.376177 | 0.477359 | 9.215468 | 21.89647 |          |          |          |          |



|       |           |          |          |          |          |          |          |          |          |          |          |          |          |
|-------|-----------|----------|----------|----------|----------|----------|----------|----------|----------|----------|----------|----------|----------|
| 19197 | LOC103231 | 15.688   | -0.79178 | 0.685957 | -1.15427 | 0.24839  | 0.343983 | 21.68345 | 13.13788 | 25.74206 | 8.928508 | 8.556443 | 16.07967 |
| 2359  | SNRNP200  | 19138.45 | -0.79182 | 0.108056 | -7.32786 | 2.34E-13 | 2.64E-12 | 23586.18 | 26296.02 | 22916    | 13488.74 | 12755.52 | 15788.23 |
| 10400 | LOC103221 | 141.2319 | -0.79183 | 0.286227 | -2.76643 | 0.005667 | 0.014487 | 222.2554 | 120.4306 | 194.1091 | 113.8385 | 96.25998 | 100.4979 |
| 5008  | TMEM18    | 580.4879 | -0.79184 | 0.16905  | -4.68409 | 2.81E-06 | 1.49E-05 | 766.5101 | 584.0884 | 857.141  | 421.872  | 434.2395 | 419.0764 |
| 5563  | LOC119615 | 325.2328 | -0.79225 | 0.180528 | -4.38852 | 1.14E-05 | 5.45E-05 | 424.4536 | 382.6409 | 425.7876 | 232.1412 | 282.3626 | 204.0108 |
| 4344  | LOC119624 | 399.2231 | -0.79255 | 0.154698 | -5.12319 | 3.00E-07 | 1.84E-06 | 513.3558 | 489.9336 | 514.8412 | 323.6584 | 263.1106 | 290.4391 |
| 2455  | GTPBP4    | 4571.431 | -0.79265 | 0.110229 | -7.19096 | 6.43E-13 | 6.97E-12 | 5638.24  | 6551.425 | 5203.375 | 3263.37  | 3272.839 | 3499.339 |
| 20116 | LOC119621 | 17.70915 | -0.79339 | 0.785684 | -1.00981 | 0.312588 | 0.413112 | 13.55216 | 39.96106 | 13.91463 | 2.232127 | 23.53022 | 13.06473 |
| 1997  | ECT2      | 6256.138 | -0.79364 | 0.099172 | -8.00257 | 1.22E-15 | 1.62E-14 | 7552.347 | 8785.412 | 7467.981 | 4424.076 | 4658.983 | 4648.03  |
| 4757  | STIM2     | 754.7232 | -0.79388 | 0.164046 | -4.83935 | 1.30E-06 | 7.28E-06 | 835.8972 | 1178.03  | 860.6197 | 540.1747 | 517.6648 | 595.9528 |
| 4244  | ZNF195    | 424.9254 | -0.79418 | 0.152992 | -5.191   | 2.09E-07 | 1.31E-06 | 544.2547 | 571.4979 | 502.318  | 283.4801 | 329.423  | 318.5785 |
| 4936  | CENPE     | 5559.712 | -0.79418 | 0.168132 | -4.72355 | 2.32E-06 | 1.25E-05 | 5907.657 | 9541.935 | 5707.084 | 4015.596 | 4152.014 | 4033.988 |
| 4978  | HIKESHI   | 1947.489 | -0.7942  | 0.168988 | -4.69978 | 2.60E-06 | 1.39E-05 | 2843.243 | 1747.886 | 2821.886 | 1417.401 | 1371.17  | 1483.35  |
| 3636  | GLI3      | 2515.151 | -0.79424 | 0.139182 | -5.70647 | 1.15E-08 | 8.43E-08 | 2791.203 | 3898.12  | 2885.198 | 1774.541 | 1786.157 | 1955.69  |
| 20157 | LOC103221 | 10.58258 | -0.79446 | 0.792893 | -1.00197 | 0.316357 | 0.417234 | 15.7205  | 10.94824 | 13.2189  | 11.16063 | 6.417332 | 6.029877 |
| 1641  | KCTD20    | 8388.799 | -0.79523 | 0.089601 | -8.87528 | 6.98E-19 | 1.13E-17 | 10433.54 | 11336.35 | 10167.42 | 6040.136 | 5944.589 | 6410.764 |
| 3191  | TLCD3A    | 1253.815 | -0.79554 | 0.128905 | -6.17152 | 6.76E-10 | 5.63E-09 | 1609.997 | 1641.688 | 1530.609 | 872.7616 | 808.5838 | 1059.248 |
| 3640  | WDR25     | 547.2292 | -0.79557 | 0.139496 | -5.7032  | 1.18E-08 | 8.59E-08 | 709.5911 | 707.8035 | 669.9893 | 363.8367 | 400.0137 | 432.1412 |
| 3541  | RAD1      | 724.4912 | -0.79594 | 0.136935 | -5.81255 | 6.15E-09 | 4.62E-08 | 1003.402 | 815.0962 | 940.6288 | 506.6928 | 545.4732 | 535.6541 |
| 19402 | LOC103211 | 14.48113 | -0.79595 | 0.712402 | -1.11727 | 0.263879 | 0.361572 | 19.51511 | 11.49565 | 23.65487 | 15.62489 | 8.556443 | 8.039836 |
| 6583  | ANKAR     | 217.9786 | -0.79595 | 0.203648 | -3.90843 | 9.29E-05 | 0.000375 | 299.2317 | 269.3266 | 258.8121 | 149.5525 | 188.2417 | 142.7071 |
| 6106  | LOC103231 | 238.6503 | -0.79646 | 0.193407 | -4.11805 | 3.82E-05 | 0.000166 | 294.895  | 281.3697 | 332.5596 | 194.195  | 154.016  | 174.8664 |
| 3576  | ZSWIM6    | 843.8156 | -0.79653 | 0.137878 | -5.77707 | 7.60E-09 | 5.65E-08 | 969.2504 | 1230.034 | 1012.289 | 618.2992 | 631.0376 | 601.9827 |
| 4783  | GAR1      | 776.5375 | -0.79671 | 0.165206 | -4.82249 | 1.42E-06 | 7.88E-06 | 847.8231 | 1209.233 | 903.7551 | 531.2462 | 539.0559 | 628.1122 |
| 1746  | HEATR1    | 6102.343 | -0.79675 | 0.092621 | -8.6023  | 7.81E-18 | 1.19E-16 | 7636.913 | 8166.289 | 7440.847 | 4446.397 | 4201.213 | 4722.399 |
| 13173 | SOX15     | 53.99563 | -0.79685 | 0.366302 | -2.1754  | 0.0296   | 0.059738 | 58.00324 | 72.25836 | 74.44326 | 40.17829 | 44.92132 | 34.1693  |
| 18682 | LOC103211 | 15.91189 | -0.7969  | 0.647214 | -1.23127 | 0.218222 | 0.310522 | 17.34676 | 22.9913  | 20.17621 | 8.928508 | 14.97377 | 11.05477 |
| 6729  | LOC119624 | 201.5213 | -0.797   | 0.207261 | -3.84537 | 0.00012  | 0.000476 | 230.3867 | 255.0939 | 279.684  | 154.0168 | 158.2942 | 131.6523 |
| 7447  | SHROOM1   | 188.5426 | -0.79704 | 0.222411 | -3.58362 | 0.000339 | 0.00121  | 249.3597 | 206.9217 | 265.0737 | 122.767  | 128.3466 | 158.7868 |
| 2301  | PCSK5     | 5038.742 | -0.79758 | 0.107619 | -7.41112 | 1.25E-13 | 1.45E-12 | 6139.67  | 7111.974 | 5946.416 | 3560.243 | 3497.446 | 3976.704 |
| 18627 | LOC103211 | 18.69859 | -0.79778 | 0.646259 | -1.23445 | 0.217034 | 0.309867 | 31.9831  | 15.87494 | 22.95914 | 8.928508 | 21.39111 | 11.05477 |
| 22359 | LOC103231 | 4.369467 | -0.79779 | 1.198611 | -0.66559 | 0.50567  | 0.601245 | 6.505036 | 3.831883 | 6.261582 | 4.464254 | 2.139111 | 3.014938 |
| 14087 | LOC103221 | 48.97242 | -0.79841 | 0.399808 | -1.99699 | 0.045826 | 0.086483 | 60.71367 | 69.5213  | 58.44144 | 31.24978 | 25.66933 | 48.23901 |
| 14180 | LOC119621 | 47.78212 | -0.79846 | 0.403253 | -1.98005 | 0.047698 | 0.089425 | 61.79785 | 71.71095 | 50.09266 | 26.78552 | 32.08666 | 44.2191  |
| 5838  | LOC103231 | 245.0412 | -0.79862 | 0.187723 | -4.25425 | 2.10E-05 | 9.55E-05 | 319.2889 | 280.2748 | 335.3425 | 171.8738 | 177.5462 | 185.9212 |
| 2389  | CENPN     | 2055.953 | -0.79873 | 0.109582 | -7.28882 | 3.13E-13 | 3.48E-12 | 2706.637 | 2398.759 | 2724.484 | 1439.722 | 1630.002 | 1436.116 |
| 8135  | FUT9      | 165.5932 | -0.79876 | 0.237081 | -3.36915 | 0.000754 | 0.002464 | 188.104  | 256.1887 | 185.7603 | 124.9991 | 121.9293 | 116.5776 |
| 2011  | SLC36A4   | 5600.18  | -0.79877 | 0.100399 | -7.95597 | 1.78E-15 | 2.35E-14 | 6679.588 | 7917.217 | 6737.463 | 4133.899 | 4104.953 | 4027.958 |
| 20396 | C5AR2     | 10.53703 | -0.79929 | 0.830778 | -0.9621  | 0.336    | 0.437956 | 10.29964 | 10.40082 | 18.78475 | 11.16063 | 8.556443 | 4.019918 |
| 17692 | LOC103221 | 21.568   | -0.79937 | 0.576672 | -1.38619 | 0.16569  | 0.248975 | 28.18849 | 20.80165 | 34.09084 | 13.39276 | 12.83466 | 20.09959 |
| 1518  | PHB2      | 6393.812 | -0.79968 | 0.087133 | -9.17763 | 4.41E-20 | 7.72E-19 | 8017.999 | 8276.319 | 8079.528 | 4544.611 | 4487.854 | 4956.559 |
| 17738 | LOC103211 | 21.08636 | -0.79974 | 0.580336 | -1.37807 | 0.168183 | 0.252066 | 26.56223 | 25.72836 | 29.22072 | 8.928508 | 14.97377 | 21.10457 |
| 10250 | LOC103221 | 92.29671 | -0.79994 | 0.285517 | -2.80173 | 0.005083 | 0.013183 | 125.222  | 119.3358 | 107.1426 | 78.12444 | 55.61688 | 68.3386  |
| 3365  | C2CD3     | 1778.978 | -0.79997 | 0.13393  | -5.97306 | 2.33E-09 | 1.84E-08 | 2013.309 | 2687.792 | 2080.933 | 1232.134 | 1306.997 | 1352.702 |
| 4260  | NEK1      | 1961.349 | -0.79999 | 0.154369 | -5.18231 | 2.19E-07 | 1.37E-06 | 2169.972 | 3173.346 | 2132.417 | 1406.24  | 1411.813 | 1474.305 |
| 3068  | ENOX2     | 807.2784 | -0.80003 | 0.126743 | -6.31223 | 2.75E-10 | 2.38E-09 | 1019.122 | 1045.557 | 1018.551 | 537.9426 | 573.2817 | 649.2167 |
| 12957 | LOC103231 | 96.32264 | -0.80003 | 0.361673 | -2.21203 | 0.026964 | 0.055326 | 169.673  | 75.54283 | 123.8402 | 66.96381 | 53.47777 | 88.43819 |
| 23281 | LDB2      | 2.933443 | -0.80013 | 1.548489 | -0.51672 | 0.605353 | 0.691264 | 1.626259 | 6.02153  | 3.478657 | 4.464254 | 0        | 2.009959 |
| 18092 | LOC103231 | 18.86984 | -0.80015 | 0.604836 | -1.32291 | 0.185864 | 0.273115 | 18.97302 | 22.9913  | 29.91645 | 11.16063 | 17.11289 | 13.06473 |
| 7474  | LOC103241 | 158.1397 | -0.80024 | 0.224093 | -3.57103 | 0.000356 | 0.001265 | 178.3464 | 205.2794 | 219.1554 | 113.8385 | 117.6511 | 114.5677 |
| 1950  | SRP68     | 3810.434 | -0.80072 | 0.098884 | -8.09758 | 5.61E-16 | 7.64E-15 | 4876.609 | 4891.125 | 4767.151 | 2573.642 | 2705.975 | 3048.103 |
| 2399  | BAG1      | 1301.401 | -0.80073 | 0.110088 | -7.2735  | 3.50E-13 | 3.88E-12 | 1725.461 | 1592.421 | 1646.1   | 973.2074 | 881.3136 | 989.9048 |
| 2049  | LOC103221 | 1715.97  | -0.80073 | 0.10155  | -7.88512 | 3.14E-15 | 4.08E-14 | 2255.621 | 2140.928 | 2149.81  | 1205.349 | 1223.571 | 1320.543 |
| 12463 | LOC103211 | 69.20367 | -0.80152 | 0.347306 | -2.30782 | 0.021009 | 0.044815 | 87.27591 | 85.94365 | 88.35788 | 46.87467 | 70.59065 | 36.17926 |
| 15337 | LOC119621 | 35.78498 | -0.80221 | 0.452518 | -1.77276 | 0.076268 | 0.132211 | 40.11439 | 53.09895 | 44.52681 | 24.5534  | 19.252   | 33.16432 |
| 3010  | RBPJ      | 2161.171 | -0.80256 | 0.125313 | -6.40443 | 1.51E-10 | 1.33E-09 | 2553.227 | 3195.79  | 2494.893 | 1607.131 | 1473.847 | 1642.136 |
| 2393  | MTIF2     | 2759.318 | -0.80263 | 0.110244 | -7.28052 | 3.33E-13 | 3.69E-12 | 3390.75  | 3924.395 | 3210.105 | 1924.093 | 2034.294 | 2072.268 |
| 3476  | L3MBTL2   | 2545.554 | -0.80328 | 0.136569 | -5.88187 | 4.06E-09 | 3.10E-08 | 3609.211 | 2709.688 | 3397.952 | 1779.005 | 1677.063 | 2100.407 |
| 3028  | NEDD1     | 3152.14  | -0.80347 | 0.126192 | -6.36706 | 1.93E-10 | 1.69E-09 | 3634.689 | 4771.789 | 3618.499 | 2247.752 | 2282.431 | 2357.682 |
| 14671 | LOC119621 | 43.91618 | -0.80378 | 0.42446  | -1.89365 | 0.058271 | 0.105585 | 46.07734 | 66.23683 | 53.57132 | 42.41041 | 32.08666 | 23.11453 |
| 1578  | DDX18     | 5873.344 | -0.80404 | 0.088953 | -9.03888 | 1.58E-19 | 2.67E-18 | 7745.872 | 7216.53  | 7449.892 | 4314.701 | 4042.919 | 4470.149 |
| 11548 | LOC103231 | 76.34267 | -0.80482 | 0.321351 | -2.50449 | 0.012263 | 0.02823  | 109.5014 | 82.11177 | 98.09812 | 55.80317 | 66.31243 | 46.22906 |
| 4676  | FTCDNL1   | 320.4344 | -0.80494 | 0.164239 | -4.90103 | 9.53E-07 | 5.42E-06 | 423.3695 | 415.4856 | 384.0437 | 241.0697 | 222.4675 | 236.1702 |
| 13419 | NKX2-6    | 54.3902  | -0.80604 | 0.37967  | -2.123   | 0.033754 | 0.066872 | 73.18166 | 66.78424 | 65.39875 | 44.64254 | 49.19955 | 27.13445 |
| 11237 | WDR38     | 269.7318 | -0.80613 | 0.313297 | -2.57307 | 0.01008  | 0.023848 | 240.1443 | 521.136  | 264.3779 | 254.4625 | 209.6328 | 128.6374 |
| 2470  | MARS1     | 10157.21 | -0.8062  | 0.112518 | -7.16514 | 7.77E-13 | 8.36E-12 | 13810.73 | 12032.11 | 12937.82 | 7383.876 | 6466.532 | 8312.185 |
| 3125  | DDX21     | 13766.62 | -0.80637 | 0.129082 | -6.24691 | 4.19E-10 | 3.56E-09 | 15795.31 | 21432.27 | 15324.18 | 9897.251 | 9818.518 | 10332.19 |
| 3688  | PRKAR2B   | 824.4385 | -0.80644 | 0.142703 | -5.65116 | 1.59E-08 | 1.15E-07 | 975.2134 | 1221.823 | 951.7605 | 573.6566 | 601.0901 | 623.0873 |
| 5190  | TRNAC-GC  | 415.9787 | -0.80651 | 0.175956 | -4.5836  | 4.57E-06 | 2.34E-05 | 435.8374 | 601.0582 | 549.6278 | 294.6408 | 327.2839 | 287.4241 |
| 3169  | FDP5      | 9071.79  | -0.80665 | 0.130211 | -6.19496 | 5.83E-10 | 4.89E-09 | 13322.31 | 9505.259 | 11810.04 | 6430.758 | 6111.439 | 7250.927 |
| 10618 | IKZF2     | 102.7793 | -0.80697 | 0.297174 | -2       |          |          |          |          |          |          |          |          |



|                 |          |          |          |          |          |          |          |          |          |          |          |          |
|-----------------|----------|----------|----------|----------|----------|----------|----------|----------|----------|----------|----------|----------|
| 2024 AKAP1      | 3418.725 | -0.80768 | 0.101905 | -7.92577 | 2.27E-15 | 2.98E-14 | 4299.829 | 4704.457 | 4055.418 | 2444.179 | 2374.413 | 2634.051 |
| 22875 LOC119621 | 3.308827 | -0.80782 | 1.387095 | -0.58238 | 0.560309 | 0.651097 | 4.878777 | 3.284471 | 4.174388 | 2.232127 | 4.278221 | 1.004979 |
| 19394 LOC119621 | 13.15143 | -0.80797 | 0.722447 | -1.11838 | 0.263403 | 0.361069 | 14.09425 | 21.34906 | 14.61036 | 13.39276 | 6.417332 | 9.044815 |
| 3380 ZNF581     | 1397.513 | -0.80799 | 0.135599 | -5.95861 | 2.54E-09 | 2.00E-08 | 1939.043 | 1507.572 | 1893.085 | 1066.957 | 909.122  | 1069.298 |
| 4035 LOC103244  | 528.1495 | -0.80817 | 0.151187 | -5.34552 | 9.02E-08 | 5.94E-07 | 671.1029 | 593.3944 | 751.3899 | 392.8543 | 389.3181 | 370.8374 |
| 1458 KLHL5      | 5960.788 | -0.80832 | 0.086472 | -9.34775 | 8.95E-21 | 1.63E-19 | 7756.714 | 7544.977 | 7470.763 | 4214.256 | 4203.352 | 4574.667 |
| 20930 ACKR1     | 7.707453 | -0.80889 | 0.912435 | -0.88652 | 0.375336 | 0.47673  | 8.673382 | 9.306001 | 11.1317  | 6.696381 | 6.417332 | 4.019918 |
| 3560 MRPL23     | 2279.181 | -0.80893 | 0.139542 | -5.79699 | 6.75E-09 | 5.04E-08 | 3134.343 | 2300.224 | 3273.416 | 1667.399 | 1587.22  | 1712.485 |
| 2154 ZNF827     | 2607.613 | -0.809   | 0.105419 | -7.67412 | 1.67E-14 | 2.05E-13 | 3114.828 | 3673.681 | 3171.839 | 1861.594 | 1927.339 | 1896.396 |
| 4554 CUNH11or   | 1708.712 | -0.80917 | 0.162816 | -4.96985 | 6.70E-07 | 3.91E-06 | 2529.917 | 1666.322 | 2336.266 | 1220.973 | 1088.807 | 1409.986 |
| 7608 LOC119621  | 178.3891 | -0.80922 | 0.229689 | -3.5231  | 0.000427 | 0.00149  | 249.3597 | 205.8268 | 227.5042 | 149.5525 | 98.39909 | 139.6921 |
| 2850 CLDN15     | 711.6545 | -0.80941 | 0.122427 | -6.61132 | 3.81E-11 | 3.55E-10 | 929.6781 | 903.7769 | 884.9703 | 531.2462 | 502.691  | 517.5644 |
| 1988 RPL24      | 23300.84 | -0.80966 | 0.100929 | -8.02203 | 1.04E-15 | 1.39E-14 | 30691.85 | 26267.01 | 32055.13 | 17303.45 | 17405.94 | 16081.68 |
| 1364 PPP1R14B   | 7839.55  | -0.8098  | 0.083729 | -9.67177 | 3.97E-22 | 7.75E-21 | 10060.04 | 9744.478 | 10152.11 | 5738.798 | 5437.619 | 5904.254 |
| 2009 LOC103221  | 2140.803 | -0.80998 | 0.101763 | -7.95946 | 1.73E-15 | 2.29E-14 | 2612.856 | 2878.291 | 2693.872 | 1531.239 | 1482.404 | 1646.156 |
| 18206 TRNAM-C4  | 18.13239 | -0.81072 | 0.623386 | -1.30052 | 0.193424 | 0.282443 | 26.02015 | 15.87494 | 27.82925 | 11.16063 | 12.83466 | 15.07469 |
| 2785 RPS27      | 26940.59 | -0.81076 | 0.120597 | -6.72291 | 1.78E-11 | 1.70E-10 | 37721.08 | 27909.79 | 37321.12 | 20051.2  | 19290.5  | 19349.87 |
| 3585 LOC103211  | 1797.423 | -0.81081 | 0.140643 | -5.76502 | 8.16E-09 | 6.05E-08 | 1998.672 | 2793.442 | 2076.062 | 1296.866 | 1324.11  | 1295.419 |
| 9523 LOC119621  | 109.9543 | -0.81085 | 0.272267 | -2.97813 | 0.0029   | 0.008096 | 164.2522 | 133.5685 | 123.8402 | 75.89232 | 72.72976 | 89.44317 |
| 2605 MTRR       | 3883.623 | -0.81098 | 0.116269 | -6.97503 | 3.06E-12 | 3.12E-11 | 4578.461 | 5748.371 | 4515.992 | 2776.766 | 2812.931 | 2869.216 |
| 10632 LOC103221 | 95.05127 | -0.81135 | 0.299338 | -2.71049 | 0.006718 | 0.016799 | 134.4374 | 104.0082 | 125.9274 | 80.35657 | 49.19955 | 76.37844 |
| 3630 ZNF778     | 1070.852 | -0.81188 | 0.142164 | -5.71084 | 1.12E-08 | 8.23E-08 | 1317.27  | 1591.326 | 1188.309 | 720.977  | 770.0798 | 837.1479 |
| 4278 CBX2       | 669.229  | -0.81195 | 0.157062 | -5.16961 | 2.35E-07 | 1.46E-06 | 942.1461 | 723.6784 | 897.4935 | 470.9788 | 436.3786 | 544.6989 |
| 2513 PAK1IP1    | 1417.375 | -0.81196 | 0.114287 | -7.10458 | 1.21E-12 | 1.28E-11 | 1730.34  | 1919.226 | 1761.592 | 1062.492 | 1090.946 | 939.6558 |
| 2425 CMSS1      | 963.2761 | -0.81234 | 0.11229  | -7.23425 | 4.68E-13 | 5.13E-12 | 1192.59  | 1242.625 | 1247.446 | 680.7987 | 718.7412 | 697.4558 |
| 6568 YRDC       | 558.3185 | -0.81255 | 0.207684 | -3.91245 | 9.14E-05 | 0.00037  | 841.318  | 534.8213 | 764.6088 | 332.5869 | 370.0661 | 506.5097 |
| 12673 LOC119611 | 58.8793  | -0.81308 | 0.358827 | -2.26593 | 0.023455 | 0.049204 | 71.01331 | 88.1333  | 66.09448 | 33.4819  | 51.33866 | 43.21412 |
| 14622 LOC103231 | 37.43269 | -0.81309 | 0.427147 | -1.90354 | 0.05697  | 0.103582 | 52.58238 | 42.15071 | 48.00546 | 26.78552 | 29.94755 | 25.12449 |
| 2621 ZDHHC4     | 1753.316 | -0.81325 | 0.117043 | -6.94833 | 3.70E-12 | 3.75E-11 | 2388.433 | 2162.824 | 2160.246 | 1279.009 | 1129.45  | 1399.936 |
| 2528 EDA2R      | 2395.04  | -0.81337 | 0.114796 | -7.08535 | 1.39E-12 | 1.46E-11 | 2967.923 | 3335.38  | 2862.935 | 1689.72  | 1595.777 | 1918.506 |
| 2145 MYBBP1A    | 4080.117 | -0.81367 | 0.105772 | -7.69267 | 1.44E-14 | 1.79E-13 | 5469.651 | 4768.504 | 5373.829 | 2874.98  | 2763.731 | 3230.004 |
| 2161 LBR        | 2760.017 | -0.81367 | 0.106131 | -7.6667  | 1.76E-14 | 2.17E-13 | 3460.679 | 3869.654 | 3227.498 | 1937.486 | 1991.512 | 2073.273 |
| 2816 CPOX       | 2289.6   | -0.81374 | 0.122027 | -6.66852 | 2.58E-11 | 2.44E-10 | 3141.933 | 2691.076 | 2933.203 | 1517.846 | 1555.133 | 1898.406 |
| 10500 LOC103231 | 194.8571 | -0.81426 | 0.296675 | -2.74462 | 0.006058 | 0.015338 | 192.4407 | 373.3349 | 178.803  | 129.4634 | 160.4333 | 134.6672 |
| 16318 LOC119621 | 25.48044 | -0.81427 | 0.508216 | -1.60221 | 0.109109 | 0.177758 | 33.06727 | 30.65506 | 34.09084 | 17.85702 | 17.11289 | 20.09959 |
| 5600 THAP2      | 239.6982 | -0.81436 | 0.186175 | -4.37417 | 1.22E-05 | 5.79E-05 | 300.3158 | 321.8781 | 297.0773 | 167.4095 | 162.5724 | 188.9361 |
| 2343 TUBGCP3    | 3909.233 | -0.81472 | 0.110831 | -7.35094 | 1.97E-13 | 2.23E-12 | 4733.498 | 5503.678 | 4724.712 | 2732.123 | 2643.941 | 3117.446 |
| 3408 TRNT1      | 1014.241 | -0.81476 | 0.137221 | -5.93755 | 2.89E-09 | 2.26E-08 | 1259.267 | 1492.245 | 1129.172 | 738.834  | 710.1847 | 755.7446 |
| 2410 NCAMT1     | 948.4885 | -0.81479 | 0.112173 | -7.26363 | 3.77E-13 | 4.16E-12 | 1240.294 | 1184.052 | 1205.007 | 676.3345 | 688.7936 | 696.4508 |
| 10917 C6DC169   | 74.66868 | -0.81544 | 0.308009 | -2.64745 | 0.00811  | 0.01975  | 101.3702 | 85.39624 | 98.79385 | 53.57105 | 55.61688 | 53.26391 |
| 8467 LOC119621  | 312.9901 | -0.81573 | 0.249995 | -3.26299 | 0.001102 | 0.003461 | 484.6252 | 262.2103 | 454.3126 | 212.0521 | 190.3808 | 274.3594 |
| 17310 FYB2      | 22.90443 | -0.81585 | 0.56397  | -1.44662 | 0.148003 | 0.227306 | 26.02015 | 39.41365 | 22.2634  | 13.39276 | 19.252   | 17.08465 |
| 2735 CDC27      | 9097.936 | -0.81609 | 0.119992 | -6.8012  | 1.04E-11 | 1.01E-10 | 10698.62 | 13775.07 | 10342.05 | 6395.044 | 6584.183 | 6792.656 |
| 2108 CLCN5      | 2783.271 | -0.81617 | 0.104824 | -7.78615 | 6.91E-15 | 8.71E-14 | 3558.797 | 3652.879 | 3447.349 | 2011.146 | 1822.522 | 2206.935 |
| 20987 LOC103244 | 7.727191 | -0.81661 | 0.926854 | -0.88106 | 0.378286 | 0.479189 | 7.047123 | 13.13788 | 9.044508 | 6.696381 | 6.417332 | 4.019918 |
| 3031 PHKA2      | 1544.285 | -0.81662 | 0.128291 | -6.36536 | 1.95E-10 | 1.71E-09 | 2028.487 | 1943.859 | 1945.265 | 1158.474 | 928.374  | 1261.249 |
| 9045 LOC103231  | 117.2309 | -0.81662 | 0.26344  | -3.09985 | 0.001936 | 0.005691 | 157.205  | 162.5813 | 130.7975 | 82.5887  | 72.72976 | 97.48301 |
| 2054 MLLT1      | 1755.216 | -0.81676 | 0.103676 | -7.87798 | 3.33E-15 | 4.31E-14 | 2183.524 | 2278.875 | 2257.648 | 1334.812 | 1167.954 | 1308.483 |
| 4223 PEX12      | 378.6876 | -0.81678 | 0.157023 | -5.20165 | 1.98E-07 | 1.24E-06 | 461.3155 | 512.9249 | 476.576  | 283.4801 | 252.4151 | 285.4142 |
| 15292 LOC103244 | 40.57526 | -0.81729 | 0.459017 | -1.78052 | 0.074992 | 0.103072 | 42.82482 | 65.68942 | 45.91827 | 44.64254 | 19.252   | 25.12449 |
| 1903 LOC103244  | 12236.47 | -0.81741 | 0.099764 | -8.19345 | 2.54E-16 | 3.55E-15 | 15258.65 | 16549.9  | 15041.02 | 8676.278 | 8128.621 | 9764.381 |
| 3094 ZNF146     | 5666.68  | -0.81747 | 0.130018 | -6.28736 | 3.23E-10 | 2.77E-09 | 6670.915 | 8755.852 | 6267.148 | 4011.132 | 3993.72  | 4301.312 |
| 1394 WDR36      | 4250.663 | -0.81753 | 0.0857   | -9.53942 | 1.44E-21 | 2.74E-20 | 5404.601 | 5613.161 | 5254.163 | 3073.639 | 3061.067 | 3097.347 |
| 26996 LOC119621 | 0.271043 | -0.81755 | 4.002093 | -0.20428 | 0.838134 | NA       | 1.626259 | 0        | 0        | 0        | 0        | 0        |
| 27308 LOC103211 | 0.271043 | -0.81755 | 4.002093 | -0.20428 | 0.838134 | NA       | 1.626259 | 0        | 0        | 0        | 0        | 0        |
| 27446 LOC119621 | 0.271043 | -0.81755 | 4.002093 | -0.20428 | 0.838134 | NA       | 1.626259 | 0        | 0        | 0        | 0        | 0        |
| 28890 LOC119621 | 0.271043 | -0.81755 | 4.002093 | -0.20428 | 0.838134 | NA       | 1.626259 | 0        | 0        | 0        | 0        | 0        |
| 28909 LOC119621 | 0.271043 | -0.81755 | 4.002093 | -0.20428 | 0.838134 | NA       | 1.626259 | 0        | 0        | 0        | 0        | 0        |
| 23084 LOC103231 | 3.01715  | -0.81791 | 1.490115 | -0.54889 | 0.583083 | 0.671515 | 4.336691 | 2.737059 | 4.87012  | 0        | 2.139111 | 4.019918 |
| 2706 LOC103221  | 4982.663 | -0.81802 | 0.11981  | -6.82766 | 8.63E-12 | 8.48E-11 | 6806.436 | 5274.86  | 6994.883 | 3631.671 | 3587.289 | 3600.841 |
| 8630 NR1D1      | 141.4989 | -0.8183  | 0.254146 | -3.21982 | 0.001283 | 0.003951 | 149.6158 | 217.8699 | 174.6286 | 109.3742 | 91.98176 | 105.5228 |
| 13097 LOC103244 | 53.65965 | -0.81845 | 0.374048 | -2.18809 | 0.028663 | 0.058182 | 58.00324 | 82.65918 | 64.70302 | 33.4819  | 44.92132 | 38.18922 |
| 16845 C1QTNF1   | 28.73026 | -0.81862 | 0.539984 | -1.516   | 0.129519 | 0.204409 | 30.35684 | 37.224   | 41.04815 | 35.71403 | 14.97377 | 13.06473 |
| 17240 LOC119621 | 23.44455 | -0.81863 | 0.560462 | -1.46063 | 0.144116 | 0.222235 | 32.52518 | 27.37059 | 29.22072 | 26.78552 | 10.69555 | 14.06971 |
| 5513 LOC103211  | 321.642  | -0.81864 | 0.185797 | -4.40611 | 1.05E-05 | 5.08E-05 | 410.3594 | 347.6065 | 471.7059 | 245.534  | 239.5804 | 215.0656 |
| 2243 POLR1E     | 2632.863 | -0.81906 | 0.108833 | -7.52589 | 5.24E-14 | 6.21E-13 | 3467.727 | 3405.449 | 3219.149 | 1816.951 | 1758.349 | 2129.551 |
| 18177 LOC103244 | 20.87492 | -0.81907 | 0.626972 | -1.30638 | 0.191422 | 0.279967 | 15.7205  | 38.86624 | 25.04633 | 11.16063 | 21.39111 | 13.06473 |
| 4040 PAX6       | 5545.959 | -0.81916 | 0.153353 | -5.34165 | 9.21E-08 | 6.06E-07 | 5978.128 | 9211.846 | 6047.993 | 4033.453 | 3989.441 | 4014.893 |
| 4867 SLC25A27   | 333.6448 | -0.81919 | 0.172051 | -4.7613  | 1.92E-06 | 1.05E-05 | 434.7533 | 457.0889 | 387.5224 | 254.4625 | 211.772  | 256.2698 |
| 17319 TESMIN    | 22.37816 | -0.81924 | 0.566786 | -1.44541 | 0.148342 | 0.227707 | 23.8518  | 26.27577 | 34.78657 | 22.32127 | 14.97377 | 12.05975 |
| 5874 LY6G5B     | 286.0864 | -0.81941 | 0.193783 | -4.22852 | 2.35E-05 | 0.000106 | 352.3561 | 411.6537 | 336.0383 | 176.338  | 198.9373 | 241.1951 |
| 1987 TIMM44     | 2399.561 | -0.81954 | 0.102156 | -8.02244 | 1.04E-15 | 1.39E-14 | 3167.411 | 3059.485 | 2971.469 | 1674.095 | 1638.559 | 1886.346 |
| 12357 LOC119621 | 111.931  | -0.81969 | 0.351694 | -2.3307  | 0.019769 | 0.042532 | 171.8414 | 93.60742 | 161.4097 | 62.49956 | 121.929  |          |



|       |           |          |          |          |          |          |          |           |          |          |          |          |          |
|-------|-----------|----------|----------|----------|----------|----------|----------|-----------|----------|----------|----------|----------|----------|
| 6160  | LOC103221 | 238.1392 | -0.82007 | 0.200356 | -4.09304 | 4.26E-05 | 0.000184 | 321.9993  | 292.3179 | 299.8602 | 191.9629 | 134.764  | 187.9312 |
| 3197  | ATF1      | 2008.637 | -0.82022 | 0.133085 | -6.16315 | 7.13E-10 | 5.93E-09 | 2301.699  | 3028.83  | 2358.529 | 1520.078 | 1508.073 | 1334.613 |
| 21893 | LOC119624 | 7.16532  | -0.82043 | 1.101189 | -0.74504 | 0.456245 | 0.554019 | 7.047123  | 13.13788 | 6.957314 | 0        | 12.83466 | 3.014938 |
| 2358  | LOC103236 | 1205.117 | -0.82055 | 0.111975 | -7.32796 | 2.34E-13 | 2.63E-12 | 1484.232  | 1627.455 | 1502.084 | 852.6725 | 924.0958 | 840.1628 |
| 7761  | KCTD12    | 155.7951 | -0.82076 | 0.23618  | -3.47516 | 0.000511 | 0.001749 | 177.2622  | 235.3871 | 185.0645 | 109.3742 | 109.0946 | 118.5876 |
| 21902 | TRNAV-UA  | 5.344895 | -0.8211  | 1.103962 | -0.74377 | 0.457014 | 0.554706 | 8.131296  | 3.831883 | 8.348776 | 4.464254 | 4.278221 | 3.014938 |
| 2174  | LOC119618 | 15103.75 | -0.82111 | 0.107233 | -7.65725 | 1.90E-14 | 2.32E-13 | 157918.94 | 45670.02 | 37120.05 | 22638.23 | 21371.85 | 24303.42 |
| 17182 | LOC119618 | 24.09596 | -0.82116 | 0.558531 | -1.47021 | 0.141506 | 0.218946 | 31.44101  | 20.25424 | 41.04815 | 15.62489 | 17.11289 | 19.09461 |
| 12693 | RAB3B     | 64.18414 | -0.8218  | 0.363323 | -2.2619  | 0.023704 | 0.049647 | 72.09749  | 94.15483 | 77.22618 | 60.26743 | 49.19955 | 32.15934 |
| 27660 | TRNAA-AG  | 0.271931 | -0.8218  | 4.001816 | -0.20536 | 0.837293 | NA       | 1.084173  | 0.547412 | 0        | 0        | 0        | 0        |
| 28224 | LOC119618 | 0.271931 | -0.8218  | 4.001816 | -0.20536 | 0.837293 | NA       | 1.084173  | 0.547412 | 0        | 0        | 0        | 0        |
| 28661 | LOC119620 | 0.271931 | -0.8218  | 4.001816 | -0.20536 | 0.837293 | NA       | 1.084173  | 0.547412 | 0        | 0        | 0        | 0        |
| 28988 | TRNAL-AA  | 0.271931 | -0.8218  | 4.001816 | -0.20536 | 0.837293 | NA       | 1.084173  | 0.547412 | 0        | 0        | 0        | 0        |
| 5416  | LOC103221 | 360.4124 | -0.82185 | 0.184565 | -4.45289 | 8.47E-06 | 4.16E-05 | 426.0799  | 411.6537 | 541.9747 | 299.105  | 237.4413 | 246.22   |
| 2641  | ZC3H10    | 34973.92 | -0.822   | 0.118869 | -6.91514 | 4.67E-12 | 4.71E-11 | 48193.65  | 36537    | 49299.52 | 25553.39 | 24717.42 | 25542.56 |
| 19412 | LOC103241 | 15.14577 | -0.82207 | 0.736226 | -1.1166  | 0.264164 | 0.361777 | 9.757555  | 32.2973  | 16.00182 | 8.928508 | 12.83466 | 11.05477 |
| 21941 | TRNAA-UG  | 5.914262 | -0.8221  | 1.115045 | -0.73728 | 0.460954 | 0.558491 | 9.215468  | 5.474118 | 8.348776 | 0        | 6.417332 | 6.029877 |
| 2044  | GFPT1     | 12774.91 | -0.82231 | 0.104221 | -7.89011 | 3.02E-15 | 3.93E-14 | 15723.76  | 18283.55 | 14958.92 | 8886.098 | 8971.43  | 9825.684 |
| 10296 | LOC119621 | 119.4653 | -0.82246 | 0.294835 | -2.78956 | 0.005278 | 0.013628 | 181.0568  | 107.8401 | 169.7585 | 71.42806 | 96.25998 | 90.44815 |
| 2348  | UBAC2     | 1076.939 | -0.8229  | 0.112073 | -7.34261 | 2.09E-13 | 2.37E-12 | 1412.677  | 1410.68  | 1307.279 | 765.6196 | 759.3843 | 805.9935 |
| 2852  | NOC4L     | 1498.265 | -0.82352 | 0.124627 | -6.60788 | 3.90E-11 | 3.63E-10 | 1926.033  | 1845.873 | 1980.747 | 1080.349 | 930.5131 | 1226.075 |
| 16424 | LOC119621 | 25.0695  | -0.82382 | 0.519548 | -1.58565 | 0.112818 | 0.182616 | 29.81475  | 37.224   | 29.22072 | 20.08914 | 14.97377 | 19.09461 |
| 5448  | LOC103231 | 272.3595 | -0.82407 | 0.185547 | -4.44132 | 8.94E-06 | 4.36E-05 | 303.0263  | 366.2185 | 375.6949 | 203.1236 | 186.1026 | 199.9909 |
| 8519  | LOC119621 | 140.7506 | -0.82422 | 0.253439 | -3.25213 | 0.001145 | 0.003575 | 183.7673  | 190.4993 | 162.1054 | 129.4634 | 96.25998 | 82.40832 |
| 7072  | LOC103220 | 184.0761 | -0.82424 | 0.222532 | -3.70391 | 0.000212 | 0.000798 | 207.077   | 253.9991 | 242.1145 | 158.481  | 126.2075 | 116.5776 |
| 2033  | GRPEL2    | 2375.851 | -0.82434 | 0.104273 | -7.90558 | 2.67E-15 | 3.49E-14 | 2888.778  | 3308.557 | 2916.506 | 1700.881 | 1653.533 | 1786.853 |
| 5075  | KLF5      | 2370.923 | -0.82445 | 0.177467 | -4.64567 | 3.39E-06 | 1.78E-05 | 2435.594  | 4132.959 | 2523.418 | 1723.202 | 1655.672 | 1754.694 |
| 3119  | SLC6A17   | 599.1706 | -0.82454 | 0.131783 | -6.25682 | 3.93E-10 | 3.35E-09 | 725.3116  | 788.8204 | 784.785  | 417.4077 | 438.5177 | 440.181  |
| 4159  | TRNRC6C   | 1150.446 | -0.82487 | 0.157087 | -5.25104 | 1.51E-07 | 9.67E-07 | 1334.617  | 1814.123 | 1259.97  | 912.9399 | 802.1665 | 778.8591 |
| 1691  | DES12     | 3273.765 | -0.82499 | 0.094288 | -8.74972 | 2.14E-18 | 3.36E-17 | 4272.725  | 4305.394 | 3982.366 | 2348.198 | 2254.623 | 2479.284 |
| 9737  | ZNF783    | 133.3883 | -0.82512 | 0.282602 | -2.91973 | 0.003503 | 0.009565 | 206.5349  | 129.7366 | 172.5414 | 104.91   | 111.2338 | 75.37346 |
| 4377  | TLE2      | 320.3832 | -0.82531 | 0.162004 | -5.09438 | 3.50E-07 | 2.13E-06 | 401.1439  | 412.7485 | 413.2644 | 236.6055 | 237.4413 | 221.0955 |
| 2991  | URB2      | 1610.646 | -0.82536 | 0.128177 | -6.43925 | 1.20E-10 | 1.07E-09 | 2279.473  | 1867.222 | 2037.797 | 1151.778 | 1033.19  | 1294.414 |
| 2471  | QTRT2     | 1335.639 | -0.82551 | 0.115233 | -7.16381 | 7.85E-13 | 8.44E-12 | 1639.269  | 1826.166 | 1662.102 | 979.9037 | 881.3136 | 1025.079 |
| 10091 | LOC103221 | 465.2683 | -0.82564 | 0.29066  | -2.84058 | 0.004503 | 0.011864 | 368.6187  | 949.7595 | 463.3571 | 383.9258 | 363.6488 | 262.2996 |
| 27025 | LOC119624 | 0.272818 | -0.82605 | 4.00154  | -0.20643 | 0.836453 | NA       | 0.542086  | 1.094824 | 0        | 0        | 0        | 0        |
| 27428 | LOC119625 | 0.272818 | -0.82605 | 4.00154  | -0.20643 | 0.836453 | NA       | 0.542086  | 1.094824 | 0        | 0        | 0        | 0        |
| 28026 | LOC119618 | 0.272818 | -0.82605 | 4.00154  | -0.20643 | 0.836453 | NA       | 0.542086  | 1.094824 | 0        | 0        | 0        | 0        |
| 2269  | ANAPC16   | 1669.664 | -0.82673 | 0.110679 | -7.4696  | 8.04E-14 | 9.42E-13 | 2205.749  | 1932.364 | 2268.78  | 1232.134 | 1167.954 | 1211     |
| 2291  | L2HGDH    | 1523.233 | -0.82682 | 0.111202 | -7.4353  | 1.04E-13 | 1.21E-12 | 2070.77   | 1778.541 | 1998.14  | 1080.349 | 1075.973 | 1135.627 |
| 17532 | LOC119628 | 22.0221  | -0.82682 | 0.585812 | -1.41141 | 0.158122 | 0.239772 | 40.11439  | 19.15941 | 25.04633 | 15.62489 | 17.11289 | 15.07469 |
| 20889 | HPDL      | 8.614945 | -0.82706 | 0.927686 | -0.89153 | 0.372646 | 0.474258 | 9.215468  | 9.853413 | 13.2189  | 6.696381 | 10.69555 | 2.009959 |
| 2520  | RGS19     | 831.1276 | -0.82714 | 0.116533 | -7.09788 | 1.27E-12 | 1.34E-11 | 1065.2    | 1086.065 | 1038.031 | 609.3707 | 586.1163 | 601.9827 |
| 4442  | CPNE7     | 362.3752 | -0.8273  | 0.163877 | -5.04829 | 4.46E-07 | 2.67E-06 | 492.2144  | 423.6967 | 474.4888 | 241.0697 | 284.5017 | 258.2797 |
| 2400  | EIF4A3    | 5917.79  | -0.82769 | 0.113844 | -7.27044 | 3.58E-13 | 3.97E-12 | 8261.396  | 6585.364 | 7870.113 | 4252.202 | 3950.937 | 4586.726 |
| 12834 | LOC103218 | 54.95766 | -0.82795 | 0.370777 | -2.23302 | 0.025547 | 0.05292  | 73.18166  | 66.23683 | 69.57314 | 42.41041 | 49.19955 | 29.1444  |
| 19806 | LOC103220 | 12.66038 | -0.828   | 0.787013 | -1.05208 | 0.292762 | 0.392965 | 26.56223  | 9.306001 | 12.52316 | 6.696381 | 12.83466 | 8.039836 |
| 4014  | LOC103218 | 361.9636 | -0.82832 | 0.15455  | -5.35954 | 8.34E-08 | 5.53E-07 | 473.7835  | 464.2052 | 452.2254 | 249.9982 | 265.2497 | 266.3196 |
| 1609  | MRPL10    | 4936.244 | -0.82838 | 0.092512 | -8.95424 | 3.42E-19 | 5.65E-18 | 6295.249  | 6568.394 | 6089.737 | 3575.867 | 3330.595 | 3757.618 |
| 3768  | TRNPHOSP  | 2169.296 | -0.82854 | 0.148556 | -5.57726 | 2.44E-08 | 1.72E-07 | 2348.86   | 3396.69  | 2578.38  | 1477.668 | 1751.932 | 1462.245 |
| 19546 | TRNAN-GL  | 13.12715 | -0.82855 | 0.759308 | -1.0912  | 0.275187 | 0.374289 | 18.43094  | 16.42235 | 14.61036 | 17.85702 | 6.417332 | 5.024897 |
| 4738  | CCL25     | 312.0196 | -0.82855 | 0.170573 | -4.85747 | 1.19E-06 | 6.67E-06 | 417.4065  | 360.7444 | 419.526  | 232.1412 | 218.1893 | 224.1104 |
| 16851 | LOC119624 | 46.32004 | -0.8288  | 0.54698  | -1.51523 | 0.129714 | 0.204642 | 78.60252  | 19.70683 | 80.70484 | 29.01765 | 25.66933 | 44.2191  |
| 24183 | TRNAV-CA  | 1.548417 | -0.82905 | 2.200226 | -0.3768  | 0.706321 | 0.776477 | 4.336691  | 0.547412 | 1.391463 | 0        | 0        | 3.014938 |
| 11858 | LOC119618 | 80.57591 | -0.82906 | 0.340559 | -2.4344  | 0.014917 | 0.033443 | 120.3432  | 75.54283 | 115.4914 | 55.80317 | 44.92132 | 71.35354 |
| 10994 | DERL3     | 74.02969 | -0.82907 | 0.315195 | -2.63033 | 0.00853  | 0.020627 | 106.791   | 85.39624 | 91.14081 | 60.26743 | 51.33866 | 49.24399 |
| 2844  | TXLNG     | 4193.231 | -0.82914 | 0.125237 | -6.62054 | 3.58E-11 | 3.35E-10 | 4847.878  | 6418.951 | 4831.854 | 3015.604 | 2981.92  | 3063.177 |
| 24791 | TRNAI-UAI | 0.924212 | -0.82922 | 2.930744 | -0.28294 | 0.777225 | 0.833498 | 2.710432  | 0        | 0.695731 | 0        | 2.139111 | 0        |
| 11357 | LOC103211 | 68.95937 | -0.82926 | 0.325664 | -2.54636 | 0.010885 | 0.02548  | 94.32303  | 79.92212 | 89.74935 | 44.64254 | 59.8951  | 45.22408 |
| 3000  | KHDRBS1   | 4067.942 | -0.82927 | 0.129211 | -6.41799 | 1.38E-10 | 1.22E-09 | 4704.226  | 6178.09  | 4740.714 | 2863.819 | 2720.949 | 3199.855 |
| 14217 | LOC103231 | 44.38623 | -0.82934 | 0.420128 | -1.97403 | 0.048379 | 0.090471 | 46.07734  | 65.14201 | 59.13717 | 42.41041 | 21.39111 | 32.15934 |
| 17648 | FAM153B   | 19.99888 | -0.82937 | 0.593851 | -1.3966  | 0.162533 | 0.24484  | 29.81475  | 19.15941 | 27.13352 | 17.85702 | 14.97377 | 11.05477 |
| 1924  | TBCD      | 5142.165 | -0.82941 | 0.101828 | -8.14514 | 3.79E-16 | 5.23E-15 | 6766.864  | 6299.615 | 6687.37  | 3531.225 | 3452.525 | 4115.391 |
| 2511  | RAD17     | 1962.542 | -0.82968 | 0.116609 | -7.11502 | 1.12E-12 | 1.18E-11 | 2302.241  | 2849.278 | 2382.184 | 1439.722 | 1413.952 | 1387.877 |
| 16732 | NDUFA4L2  | 27.78658 | -0.82993 | 0.54005  | -1.53676 | 0.124352 | 0.197568 | 42.28274  | 23.53871 | 39.65669 | 26.78552 | 21.39111 | 13.06473 |
| 2882  | DSG2      | 2326.275 | -0.83011 | 0.126305 | -6.57233 | 4.95E-11 | 4.57E-10 | 2747.836  | 3478.802 | 2707.786 | 1555.793 | 1751.932 | 1715.5   |
| 2169  | CSNK2A1   | 15640.85 | -0.83021 | 0.108352 | -7.66213 | 1.83E-14 | 2.24E-13 | 18300.84  | 23038.37 | 18726.31 | 11169.56 | 10952.25 | 11657.76 |
| 2836  | CIT       | 3045.683 | -0.83028 | 0.125145 | -6.63456 | 3.25E-11 | 3.05E-10 | 3585.901  | 4473.449 | 3644.241 | 2066.95  | 2051.407 | 2452.15  |
| 26927 | MSTO1     | 0.273706 | -0.83029 | 4.001265 | -0.20751 | 0.835614 | NA       | 0         | 1.642235 | 0        | 0        | 0        | 0        |
| 27101 | LOC119624 | 0.273706 | -0.83029 | 4.001265 | -0.20751 | 0.835614 | NA       | 0         | 1.642235 | 0        | 0        | 0        | 0        |
| 27771 | LOC119621 | 0.273706 | -0.83029 | 4.001265 | -0.20751 | 0.835614 | NA       | 0         | 1.642235 | 0        | 0        | 0        | 0        |
| 27842 | TRNAG-GC  | 0.273706 | -0.83029 | 4.001265 | -0.20751 | 0.835614 | NA       | 0         | 1.642235 | 0        | 0        | 0        | 0        |
| 28160 | LOC119618 | 0.273706 | -0.83029 | 4.       |          |          |          |           |          |          |          |          |          |



|       |           |          |          |          |          |          |          |          |          |          |          |          |          |
|-------|-----------|----------|----------|----------|----------|----------|----------|----------|----------|----------|----------|----------|----------|
| 29053 | LOC103243 | 0.273706 | -0.83029 | 4.001265 | -0.20751 | 0.835614 | NA       | 0        | 1.642235 | 0        | 0        | 0        | 0        |
| 29420 | LOC119623 | 0.273706 | -0.83029 | 4.001265 | -0.20751 | 0.835614 | NA       | 0        | 1.642235 | 0        | 0        | 0        | 0        |
| 29553 | LOC119623 | 0.273706 | -0.83029 | 4.001265 | -0.20751 | 0.835614 | NA       | 0        | 1.642235 | 0        | 0        | 0        | 0        |
| 2122  | NOTCH2    | 22418.79 | -0.83036 | 0.107151 | -7.74942 | 9.23E-15 | 1.16E-13 | 27817.16 | 31060.15 | 27228.14 | 15426.23 | 14791.95 | 18189.12 |
| 2452  | BRCA2     | 3633.554 | -0.83059 | 0.115424 | -7.19602 | 6.20E-13 | 6.72E-12 | 4454.324 | 5324.675 | 4179.258 | 2526.768 | 2562.655 | 2753.644 |
| 4974  | TOB1      | 1002.269 | -0.83077 | 0.176704 | -4.70145 | 2.58E-06 | 1.38E-05 | 1050.021 | 1679.459 | 1118.04  | 732.1376 | 746.5496 | 687.406  |
| 6422  | APRT      | 1792.813 | -0.83097 | 0.209227 | -3.9716  | 7.14E-05 | 0.000296 | 2847.038 | 1399.185 | 2642.388 | 1294.634 | 1146.563 | 1427.071 |
| 3150  | LOC119624 | 821.8024 | -0.83138 | 0.13368  | -6.21915 | 5.00E-10 | 4.22E-09 | 1129.708 | 997.9317 | 1022.725 | 654.0132 | 596.8119 | 529.6242 |
| 17884 | LOC103233 | 22.92325 | -0.83139 | 0.609684 | -1.36364 | 0.172681 | 0.256695 | 40.65648 | 15.87494 | 30.61218 | 20.08914 | 19.252   | 11.05477 |
| 2770  | TMEM222   | 1511.355 | -0.83151 | 0.123326 | -6.74236 | 1.56E-11 | 1.50E-10 | 2081.07  | 1768.688 | 1964.05  | 1020.082 | 1018.217 | 1216.025 |
| 3496  | LOC103233 | 916.9399 | -0.83165 | 0.141961 | -5.85832 | 4.68E-09 | 3.56E-08 | 1252.22  | 1037.345 | 1239.793 | 582.5851 | 646.0114 | 743.6848 |
| 1992  | RPS17     | 22089.04 | -0.83173 | 0.103812 | -8.01187 | 1.13E-15 | 1.51E-14 | 26542.17 | 30226.99 | 28076.94 | 16426.22 | 17162.08 | 14099.86 |
| 1980  | CELSR1    | 5496.189 | -0.83177 | 0.103561 | -8.03167 | 9.62E-16 | 1.29E-14 | 7119.22  | 6815.824 | 7191.079 | 3792.384 | 3623.653 | 4434.974 |
| 2073  | KAT2A     | 3299.135 | -0.83186 | 0.106001 | -7.84766 | 4.24E-15 | 5.44E-14 | 4440.772 | 3996.106 | 4247.44  | 2232.127 | 2250.344 | 2628.021 |
| 4203  | CENPJ     | 2128.631 | -0.83203 | 0.159511 | -5.21614 | 1.83E-07 | 1.16E-06 | 2250.743 | 3513.836 | 2414.884 | 1453.115 | 1542.299 | 1596.912 |
| 23267 | LOC119628 | 2.54201  | -0.83262 | 1.602046 | -0.51972 | 0.603258 | 0.689286 | 4.336691 | 2.189647 | 3.478657 | 2.232127 | 0        | 3.014938 |
| 1778  | NOP53     | 4882.454 | -0.83303 | 0.097804 | -8.51732 | 1.63E-17 | 2.44E-16 | 5774.304 | 6580.985 | 6412.556 | 3535.689 | 3304.926 | 3686.265 |
| 22012 | CCDC38    | 5.254903 | -0.83339 | 1.151554 | -0.72371 | 0.469246 | 0.566732 | 5.420864 | 6.568942 | 7.653045 | 4.464254 | 6.417332 | 1.004979 |
| 18154 | PACRG     | 17.36517 | -0.83341 | 0.635189 | -1.31206 | 0.1895   | 0.277507 | 18.97302 | 19.15941 | 29.22072 | 8.928508 | 12.83466 | 15.07469 |
| 3185  | LOC103221 | 789.8954 | -0.83345 | 0.134848 | -6.18069 | 6.38E-10 | 5.33E-09 | 1129.708 | 907.0614 | 997.6788 | 575.8888 | 573.2817 | 555.7536 |
| 2022  | CCNB2     | 2262.432 | -0.83346 | 0.105031 | -7.93542 | 2.10E-15 | 2.76E-14 | 2881.189 | 3013.502 | 2805.885 | 1671.863 | 1469.569 | 1732.585 |
| 1887  | SYMPK     | 3287.365 | -0.8335  | 0.101325 | -8.226   | 1.94E-16 | 2.73E-15 | 4330.728 | 4248.463 | 4062.375 | 2390.608 | 2143.389 | 2548.628 |
| 1995  | TACO1     | 2009.786 | -0.83352 | 0.104121 | -8.00531 | 1.19E-15 | 1.59E-14 | 2721.274 | 2414.634 | 2593.687 | 1390.615 | 1413.952 | 1524.554 |
| 1056  | UCHL1     | 36833.01 | -0.83359 | 0.077852 | -10.7073 | 9.41E-27 | 2.37E-25 | 46535.95 | 48051.26 | 46982.04 | 26191.78 | 25737.78 | 27499.25 |
| 22742 | LOC119615 | 3.459466 | -0.83361 | 1.384645 | -0.60204 | 0.547151 | 0.63961  | 6.505036 | 5.474118 | 1.391463 | 2.232127 | 2.139111 | 3.014938 |
| 2244  | CARS1     | 6716.842 | -0.83379 | 0.110865 | -7.52079 | 5.44E-14 | 6.45E-13 | 9249.62  | 8022.868 | 8554.713 | 4660.681 | 4370.203 | 5442.969 |
| 8478  | LOC103221 | 184.0741 | -0.83471 | 0.256014 | -3.26042 | 0.001112 | 0.003488 | 255.3227 | 170.7925 | 281.0755 | 156.2489 | 113.3729 | 127.6324 |
| 3235  | MED1      | 7460.221 | -0.83481 | 0.136228 | -6.12804 | 8.90E-10 | 7.31E-09 | 8405.591 | 11858.58 | 8418.35  | 5410.676 | 5114.614 | 5553.517 |
| 2930  | LOC103221 | 1090.227 | -0.83491 | 0.128229 | -6.51104 | 7.46E-11 | 6.77E-10 | 1430.566 | 1435.861 | 1333.717 | 736.6019 | 710.1847 | 894.4317 |
| 1721  | GNL3      | 5706.123 | -0.83535 | 0.096383 | -8.66699 | 4.44E-18 | 6.85E-17 | 7115.968 | 8016.299 | 6807.731 | 4100.417 | 4089.98  | 4106.346 |
| 2355  | NCF2      | 1134.31  | -0.8357  | 0.113943 | -7.33433 | 2.23E-13 | 2.52E-12 | 1549.825 | 1422.723 | 1392.158 | 774.5481 | 821.4185 | 845.1877 |
| 8968  | TMEM14C   | 308.1477 | -0.83588 | 0.267339 | -3.12666 | 0.001768 | 0.005241 | 493.2986 | 227.1759 | 465.4443 | 198.6593 | 233.1631 | 231.1453 |
| 17427 | LOC119624 | 502.5072 | -0.83591 | 0.587158 | -1.42365 | 0.154547 | 0.235735 | 832.6447 | 226.6285 | 873.8386 | 350.4439 | 297.3364 | 434.1511 |
| 11314 | LOC119628 | 71.42714 | -0.83607 | 0.32725  | -2.55483 | 0.102624 | 0.024963 | 102.4543 | 87.03848 | 83.48776 | 51.33892 | 62.03421 | 42.20914 |
| 12244 | TRNAI-AAI | 66.12663 | -0.83638 | 0.354759 | -2.35759 | 0.018394 | 0.039935 | 68.30288 | 110.5772 | 75.83472 | 46.87467 | 44.92132 | 50.24897 |
| 9998  | LOC103221 | 88.8318  | -0.83638 | 0.292246 | -2.86192 | 0.004211 | 0.011197 | 114.3802 | 111.1246 | 118.2743 | 62.49956 | 51.33866 | 75.37346 |
| 2442  | CENPI     | 1398.181 | -0.83657 | 0.116156 | -7.20209 | 5.93E-13 | 6.46E-12 | 1900.013 | 1684.386 | 1800.553 | 941.9576 | 964.7389 | 1097.438 |
| 3764  | LOC103221 | 566.8231 | -0.83682 | 0.149985 | -5.57938 | 2.41E-08 | 1.70E-07 | 664.5979 | 827.6867 | 685.9911 | 428.5684 | 402.1528 | 391.942  |
| 6293  | LOC119628 | 293.1941 | -0.83688 | 0.207703 | -4.0292  | 5.60E-05 | 0.002236 | 429.3324 | 307.6454 | 391.001  | 171.8738 | 250.2759 | 209.0357 |
| 4580  | CDCA3     | 815.636  | -0.83708 | 0.169006 | -4.95299 | 7.31E-07 | 4.24E-06 | 1212.647 | 809.0747 | 1119.432 | 571.4245 | 539.0559 | 642.1819 |
| 4839  | LOC103215 | 420.0306 | -0.8371  | 0.174773 | -4.78962 | 1.67E-06 | 9.18E-06 | 463.4838 | 630.071  | 523.8857 | 312.4978 | 271.6671 | 318.5785 |
| 22871 | LOC103221 | 3.537505 | -0.83746 | 1.436033 | -0.58317 | 0.559777 | 0.650678 | 7.047123 | 4.926706 | 2.087194 | 0        | 2.139111 | 5.024897 |
| 3376  | STX18     | 856.2924 | -0.83746 | 0.140431 | -5.9635  | 2.47E-09 | 1.94E-08 | 1016.412 | 1239.34  | 1040.814 | 651.7811 | 541.195  | 648.2118 |
| 2423  | LOC103243 | 1636.667 | -0.83757 | 0.115729 | -7.27336 | 4.58E-13 | 5.02E-12 | 2231.227 | 2033.087 | 2039.884 | 1156.242 | 1063.138 | 1296.424 |
| 3082  | CUNH18or  | 1459.17  | -0.83762 | 0.132948 | -6.30036 | 2.97E-10 | 2.56E-09 | 1720.582 | 2194.027 | 1696.889 | 1022.314 | 1110.198 | 1011.009 |
| 11990 | LOC119621 | 61.5193  | -0.83805 | 0.347968 | -2.40841 | 0.016022 | 0.035525 | 87.81799 | 73.35318 | 74.44326 | 55.80317 | 38.50399 | 39.1942  |
| 10562 | LOC103221 | 84.13096 | -0.83827 | 0.307023 | -2.73033 | 0.006327 | 0.015926 | 103.5385 | 128.0944 | 91.83654 | 53.57105 | 68.45154 | 59.29379 |
| 5900  | CCS       | 305.841  | -0.83833 | 0.199022 | -4.21225 | 2.53E-05 | 0.000114 | 421.2011 | 367.8607 | 393.784  | 207.5878 | 173.268  | 271.3445 |
| 12899 | LOC119615 | 55.65075 | -0.83887 | 0.378009 | -2.21919 | 0.026474 | 0.054561 | 88.36008 | 53.64636 | 71.66033 | 42.41041 | 40.6431  | 37.18424 |
| 12987 | LOC103233 | 49.01845 | -0.83896 | 0.380293 | -2.20609 | 0.027378 | 0.056039 | 68.84497 | 62.40495 | 56.35424 | 35.71403 | 40.6431  | 30.14938 |
| 9420  | LOC119621 | 107.1888 | -0.83921 | 0.279466 | -3.00291 | 0.002674 | 0.007547 | 112.754  | 161.4865 | 139.1463 | 69.19594 | 79.14709 | 81.40334 |
| 8771  | LOC119621 | 186.7399 | -0.83943 | 0.263849 | -3.18147 | 0.001465 | 0.004441 | 287.8479 | 164.2235 | 265.0737 | 131.6955 | 154.016  | 117.5826 |
| 1201  | RPL14     | 38192.97 | -0.8395  | 0.082772 | -10.1424 | 3.58E-24 | 7.93E-23 | 4926.86  | 46409.57 | 51365.15 | 27649.36 | 27960.32 | 26546.53 |
| 2656  | HMGB2     | 5955.873 | -0.83965 | 0.12196  | -6.88461 | 5.79E-12 | 5.80E-11 | 6980.988 | 8998.903 | 6949.661 | 4196.399 | 4038.641 | 4570.647 |
| 3017  | RPL31     | 21440.22 | -0.83973 | 0.131424 | -6.3895  | 1.66E-10 | 1.47E-09 | 30086.34 | 21493.58 | 30948.22 | 15473.1  | 15534.22 | 15105.85 |
| 8828  | LOC119621 | 109.6689 | -0.83978 | 0.265436 | -3.16378 | 0.001557 | 0.00469  | 146.3633 | 131.3788 | 146.7993 | 71.42806 | 70.59065 | 91.45313 |
| 16012 | LOC103224 | 28.09051 | -0.83989 | 0.505171 | -1.66259 | 0.096395 | 0.160046 | 32.52518 | 36.67659 | 38.26523 | 29.01765 | 14.97377 | 17.08465 |
| 2031  | SAAL1     | 1388.637 | -0.84012 | 0.106251 | -7.90698 | 2.64E-15 | 3.45E-14 | 1727.087 | 1857.368 | 1756.722 | 1029.011 | 1013.938 | 947.6956 |
| 3155  | RNASEH2A  | 1158.316 | -0.84013 | 0.135247 | -6.21179 | 5.24E-10 | 4.41E-09 | 1636.559 | 1334.043 | 1494.431 | 720.977  | 851.366  | 912.5214 |
| 18944 | LOC119621 | 17.44903 | -0.84017 | 0.70239  | -1.19616 | 0.231633 | 0.325062 | 20.59928 | 18.06459 | 27.13352 | 15.62489 | 19.252   | 4.019918 |
| 2352  | RPL17     | 40271.99 | -0.84023 | 0.114515 | -7.33732 | 2.18E-13 | 2.46E-12 | 51763.83 | 45174.07 | 58090.79 | 30254.25 | 30358.26 | 25990.78 |
| 5863  | LOC103234 | 308.1463 | -0.84034 | 0.198396 | -4.23564 | 2.28E-05 | 0.000103 | 348.0194 | 483.3646 | 352.7358 | 225.4448 | 235.3022 | 204.0108 |
| 11441 | LOC103243 | 72.8668  | -0.84037 | 0.332449 | -2.52783 | 0.011477 | 0.026669 | 73.72375 | 112.2194 | 93.92374 | 51.33892 | 57.75599 | 48.23901 |
| 11428 | LOC103233 | 99.71993 | -0.84047 | 0.332162 | -2.53028 | 0.011397 | 0.026513 | 95.4072  | 171.8873 | 114.7957 | 66.96381 | 91.98176 | 57.28383 |
| 2439  | ANXA8L1   | 886.8619 | -0.8405  | 0.116564 | -7.21066 | 5.57E-13 | 6.07E-12 | 1161.691 | 1146.28  | 1109.692 | 604.9064 | 635.3159 | 663.2864 |
| 22084 | LOC103233 | 4.422255 | -0.84175 | 1.181928 | -0.71218 | 0.47635  | 0.573437 | 5.420864 | 6.02153  | 5.565851 | 2.232127 | 4.278221 | 3.014938 |
| 1455  | SARS1     | 4035.477 | -0.84197 | 0.09     | -9.35524 | 8.34E-21 | 1.52E-19 | 5247.938 | 5250.774 | 5048.227 | 2930.783 | 2725.227 | 3009.914 |
| 13359 | GPR19     | 50.33158 | -0.842   | 0.394308 | -2.13538 | 0.03273  | 0.065134 | 60.71367 | 70.61612 | 60.52863 | 37.94616 | 47.06043 | 25.12449 |
| 11017 | LOC119621 | 77.46026 | -0.84215 | 0.320748 | -2.62557 | 0.008651 | 0.020874 | 110.5856 | 80.46954 | 108.5341 | 55.80317 | 47.06043 | 62.30873 |
| 1821  | ATP6V0A2  | 2015.925 | -0.84293 | 0.100441 | -8.3923  | 4.77E-17 | 6.96E-16 | 2686.038 | 2623.197 | 2461.498 | 1401.776 | 1407.535 | 1515.509 |
| 5096  | LOC103224 | 343.1065 | -0.84302 | 0.182034 | -4.63113 | 3.64E-06 | 1.90E-05 | 443.4267 | 464.2052 | 416.7431 | 189.7308 |          |          |



|       |           |          |          |          |          |          |          |          |          |          |          |          |          |
|-------|-----------|----------|----------|----------|----------|----------|----------|----------|----------|----------|----------|----------|----------|
| 9696  | LOC103245 | 87.43807 | -0.84389 | 0.287828 | -2.93192 | 0.003369 | 0.009237 | 121.4273 | 110.5772 | 105.0554 | 55.80317 | 68.45154 | 63.31371 |
| 3753  | XRCC3     | 509.4693 | -0.84396 | 0.150944 | -5.59122 | 2.25E-08 | 1.60E-07 | 687.9076 | 579.7091 | 697.1228 | 377.2295 | 337.9795 | 376.8673 |
| 12626 | TRIM66    | 54.58489 | -0.84436 | 0.370995 | -2.27593 | 0.02285  | 0.048113 | 78.60252 | 64.04718 | 66.09448 | 49.10679 | 38.50399 | 31.15436 |
| 19447 | ATP6V1C2  | 13.17179 | -0.8445  | 0.760546 | -1.11039 | 0.266832 | 0.364803 | 11.9259  | 25.18094 | 13.2189  | 6.696381 | 14.97377 | 7.034856 |
| 1813  | IRAK1     | 5556.509 | -0.84469 | 0.100319 | -8.42003 | 3.76E-17 | 5.52E-16 | 7600.593 | 6567.847 | 7253     | 3957.561 | 3722.053 | 4237.998 |
| 8215  | WNK4      | 136.0651 | -0.84469 | 0.25277  | -3.34173 | 0.000833 | 0.002694 | 143.1108 | 185.0252 | 196.892  | 87.05295 | 104.8164 | 99.49297 |
| 2582  | XRCC4     | 989.0353 | -0.84563 | 0.120676 | -7.00745 | 2.43E-12 | 2.50E-11 | 1206.684 | 1374.551 | 1230.053 | 680.7987 | 748.6887 | 693.4358 |
| 3527  | METTL23   | 784.7689 | -0.84625 | 0.145166 | -5.8295  | 5.56E-09 | 4.19E-08 | 1053.274 | 864.3633 | 1104.821 | 555.7996 | 611.7857 | 518.5694 |
| 16110 | LOC119625 | 28.08719 | -0.8465  | 0.515127 | -1.64329 | 0.100323 | 0.165554 | 37.40396 | 35.03436 | 34.78657 | 31.24978 | 14.97377 | 15.07469 |
| 2623  | BORA      | 1248.782 | -0.84662 | 0.12191  | -6.94463 | 3.79E-12 | 3.85E-11 | 1550.909 | 1782.373 | 1484.691 | 899.5472 | 838.5314 | 936.6409 |
| 4021  | LOC119625 | 819.9783 | -0.84664 | 0.158071 | -5.35607 | 8.50E-08 | 5.62E-07 | 1082.004 | 863.8158 | 1214.051 | 553.5675 | 656.707  | 549.7238 |
| 20653 | LOC103245 | 8.424209 | -0.84665 | 0.912207 | -0.92814 | 0.353336 | 0.454822 | 11.38381 | 10.40082 | 10.43597 | 11.16063 | 2.139111 | 5.024897 |
| 3944  | CATSPERZ  | 369.053  | -0.84689 | 0.156508 | -5.41118 | 6.26E-08 | 4.22E-07 | 497.6353 | 446.1406 | 479.3589 | 272.3195 | 254.5542 | 264.3096 |
| 2275  | TCOF1     | 4574.104 | -0.84692 | 0.11359  | -7.45597 | 8.92E-14 | 1.04E-12 | 5674.56  | 6463.291 | 5508.801 | 3232.12  | 2934.86  | 3630.991 |
| 8035  | B3GALT5   | 118.7723 | -0.84714 | 0.248931 | -3.40312 | 0.000666 | 0.002204 | 142.5687 | 162.5813 | 152.3652 | 89.28508 | 83.42532 | 82.40832 |
| 4458  | COMMD8    | 1066.949 | -0.84749 | 0.168277 | -5.0363  | 4.75E-07 | 2.83E-06 | 1528.141 | 1017.091 | 1571.657 | 716.5128 | 774.3581 | 793.9338 |
| 19646 | LOC103235 | 12.02754 | -0.84752 | 0.785958 | -1.07833 | 0.280887 | 0.380097 | 17.88885 | 14.78012 | 13.91463 | 13.39276 | 2.139111 | 10.04979 |
| 21286 | LOC119625 | 7.68944  | -0.84765 | 1.012799 | -0.83694 | 0.402627 | 0.502858 | 9.215468 | 11.49565 | 8.348776 | 2.232127 | 12.83466 | 2.009959 |
| 3117  | BBS7      | 1451.507 | -0.84769 | 0.135468 | -6.2575  | 3.91E-10 | 3.34E-09 | 1658.784 | 2215.376 | 1724.022 | 1058.028 | 1009.66  | 1043.169 |
| 4252  | BEND6     | 688.6025 | -0.84781 | 0.16344  | -5.18728 | 2.13E-07 | 1.33E-06 | 760.0051 | 1081.686 | 815.3972 | 495.5322 | 468.4652 | 510.5296 |
| 1719  | RAD23A    | 5846.801 | -0.84781 | 0.097641 | -8.68294 | 3.86E-18 | 5.96E-17 | 7163.671 | 8176.143 | 7216.822 | 4122.739 | 3991.581 | 4409.85  |
| 3426  | FOXO1     | 470.907  | -0.84782 | 0.143248 | -5.91853 | 3.25E-09 | 2.52E-08 | 606.5946 | 603.7952 | 609.4607 | 330.3548 | 314.4493 | 360.7876 |
| 1255  | LOC103225 | 5569.824 | -0.84809 | 0.084877 | -9.992   | 1.65E-23 | 3.50E-22 | 6991.83  | 7467.245 | 7019.93  | 4055.775 | 3970.189 | 3910.375 |
| 3030  | SGO2      | 2059.274 | -0.84843 | 0.133269 | -6.36626 | 1.94E-10 | 1.70E-09 | 2339.103 | 3165.135 | 2442.017 | 1408.472 | 1525.186 | 1479.33  |
| 17247 | LOC103235 | 23.68511 | -0.84845 | 0.581856 | -1.45818 | 0.144791 | 0.223185 | 33.06727 | 38.31883 | 20.17621 | 8.928508 | 23.53022 | 18.08963 |
| 4147  | TCERG1    | 7603.759 | -0.84851 | 0.161311 | -5.26009 | 1.44E-07 | 9.23E-07 | 8118.828 | 13028.95 | 8185.28  | 5261.123 | 5471.845 | 5556.531 |
| 10310 | CD101     | 93.62728 | -0.8486  | 0.304524 | -2.78663 | 0.005326 | 0.013733 | 110.5856 | 123.1677 | 126.6231 | 49.10679 | 91.98176 | 60.29877 |
| 18078 | LOC119625 | 21.00055 | -0.84906 | 0.639495 | -1.3277  | 0.184278 | 0.270994 | 41.19856 | 23.53871 | 17.39328 | 8.928508 | 12.83466 | 22.10955 |
| 2126  | HUWE1     | 20892.72 | -0.84936 | 0.109745 | -7.73937 | 9.99E-15 | 1.25E-13 | 25114.32 | 30680.24 | 24825.09 | 14426.24 | 14235.78 | 16074.65 |
| 3076  | MIS18A    | 870.1915 | -0.84936 | 0.134713 | -6.30495 | 2.88E-10 | 2.49E-09 | 1077.668 | 1266.164 | 1010.898 | 636.1562 | 635.3159 | 594.9478 |
| 2428  | LOC119625 | 822.54   | -0.84981 | 0.117542 | -7.22983 | 4.84E-13 | 5.30E-12 | 1033.759 | 1066.906 | 1074.905 | 595.9779 | 564.7252 | 598.9678 |
| 19383 | LOC119625 | 11.3752  | -0.84986 | 0.758721 | -1.12012 | 0.262661 | 0.360256 | 13.55216 | 14.78012 | 15.30609 | 11.16063 | 6.417332 | 7.034856 |
| 19084 | TRNAL-CA1 | 15.00992 | -0.8504  | 0.725637 | -1.17193 | 0.241225 | 0.336038 | 24.39389 | 9.853413 | 24.3506  | 6.696381 | 10.69555 | 14.06971 |
| 2231  | CDC25C    | 1825.268 | -0.85042 | 0.112712 | -7.54507 | 4.52E-14 | 5.39E-13 | 1381.778 | 1291.892 | 1285.712 | 718.7449 | 718.7412 | 754.7396 |
| 17052 | PIP5K1B   | 20.64808 | -0.85044 | 0.572032 | -1.4867  | 0.137095 | 0.213739 | 25.47806 | 25.18094 | 28.52499 | 13.39276 | 19.252   | 12.05975 |
| 13247 | PTGES3L   | 43.73667 | -0.85082 | 0.394234 | -2.15816 | 0.030916 | 0.062044 | 55.8349  | 52.00412 | 61.22436 | 31.24978 | 29.94755 | 32.15934 |
| 3526  | RPS19     | 30910.35 | -0.8511  | 0.145963 | -5.83094 | 5.51E-09 | 4.16E-08 | 45173.68 | 29457.32 | 44688.91 | 21979.75 | 21083.07 | 23079.35 |
| 2402  | NANOS1    | 1114.669 | -0.85113 | 0.117093 | -7.26882 | 3.63E-13 | 4.01E-12 | 1385.573 | 1534.943 | 1386.593 | 790.173  | 746.5496 | 844.1828 |
| 1714  | BMI1      | 3351.174 | -0.85119 | 0.097954 | -8.68963 | 3.64E-18 | 5.64E-17 | 4080.284 | 4686.393 | 4168.127 | 2383.912 | 2423.612 | 2364.717 |
| 1663  | DDX5      | 34739.53 | -0.85128 | 0.096665 | -8.80654 | 1.29E-18 | 2.06E-17 | 42321.22 | 49567.59 | 42220.46 | 24149.38 | 24216.87 | 25961.63 |
| 8930  | CFAP70    | 97.86904 | -0.85145 | 0.271361 | -3.13769 | 0.001703 | 0.005069 | 132.8112 | 116.5987 | 128.7103 | 71.42806 | 66.31243 | 71.35354 |
| 2112  | ATXN7L3   | 4538.941 | -0.85196 | 0.109498 | -7.78055 | 7.22E-15 | 9.09E-14 | 6181.953 | 5296.757 | 6054.95  | 3124.978 | 3003.311 | 3571.697 |
| 3057  | PLXNC1    | 605.2872 | -0.85209 | 0.134594 | -6.33081 | 2.44E-10 | 2.12E-09 | 758.9209 | 818.3807 | 755.5643 | 448.6575 | 449.2132 | 400.9868 |
| 3270  | RPS7      | 33428.34 | -0.85218 | 0.140265 | -6.07545 | 1.24E-09 | 1.01E-08 | 45028.4  | 33347.23 | 50691.68 | 24602.5  | 25115.3  | 21784.94 |
| 14978 | LOC119625 | 1825.249 | -0.85358 | 0.464306 | -1.8384  | 0.066004 | 0.117152 | 2880.647 | 1054.315 | 3115.485 | 1267.848 | 1234.267 | 1398.931 |
| 3968  | FAM117B   | 485.0935 | -0.8537  | 0.158104 | -5.39964 | 6.68E-08 | 4.47E-07 | 606.5946 | 697.4027 | 568.4125 | 386.158  | 312.3102 | 339.6831 |
| 13629 | LOC119625 | 42.33389 | -0.85425 | 0.410075 | -2.08317 | 0.037236 | 0.072633 | 55.29281 | 54.19377 | 52.87558 | 29.01765 | 38.50399 | 24.11951 |
| 2020  | SKP2      | 1817.588 | -0.85428 | 0.107624 | -7.9376  | 2.06E-15 | 2.71E-14 | 2300.615 | 2536.159 | 2187.379 | 1294.634 | 1247.102 | 1339.638 |
| 2855  | BTF3      | 10821.34 | -0.85469 | 0.129376 | -6.60626 | 3.94E-11 | 3.67E-10 | 11926.98 | 16976.34 | 12903.03 | 7888.337 | 7754.276 | 7479.057 |
| 3873  | PROCA1    | 377.4956 | -0.85478 | 0.156188 | -5.47279 | 4.43E-08 | 3.04E-07 | 506.8508 | 488.2913 | 460.5742 | 276.7837 | 280.2235 | 252.2498 |
| 18304 | LOC103225 | 15.40903 | -0.85553 | 0.667752 | -1.28121 | 0.200121 | 0.290626 | 15.17842 | 26.27577 | 18.08902 | 11.16063 | 10.69555 | 11.05477 |
| 5135  | TMEM52B   | 285.0719 | -0.85567 | 0.18568  | -4.60832 | 4.06E-06 | 2.10E-05 | 334.4673 | 406.1796 | 357.6059 | 209.8199 | 222.4675 | 179.8913 |
| 3787  | ATP7B     | 470.3885 | -0.8558  | 0.154015 | -5.55659 | 2.75E-08 | 1.93E-07 | 635.3252 | 575.3298 | 611.5479 | 341.5154 | 288.7799 | 369.8324 |
| 4459  | ATP6AP1L  | 514.3217 | -0.85581 | 0.169943 | -5.03587 | 4.76E-07 | 2.84E-06 | 622.3152 | 765.8291 | 594.1546 | 377.2295 | 412.8484 | 313.5536 |
| 8579  | LOC103215 | 106.8847 | -0.85616 | 0.264722 | -3.23419 | 0.00122  | 0.00378  | 138.232  | 138.4952 | 134.9719 | 71.42806 | 89.84265 | 68.3386  |
| 10515 | LOC103225 | 82.39548 | -0.85621 | 0.312387 | -2.74086 | 0.006128 | 0.015493 | 100.8281 | 90.32295 | 128.7103 | 53.57105 | 55.61688 | 65.32367 |
| 3914  | RFNG      | 1123.421 | -0.85649 | 0.157589 | -5.43494 | 5.48E-08 | 3.72E-07 | 1563.377 | 1126.026 | 1656.536 | 756.691  | 778.6363 | 859.2574 |
| 7654  | HHEX      | 127.445  | -0.8567  | 0.244132 | -3.50915 | 0.00045  | 0.001561 | 177.8043 | 158.202  | 155.1481 | 95.98146 | 94.12087 | 83.4133  |
| 22171 | LOC119625 | 4.596928 | -0.8569  | 1.231805 | -0.69565 | 0.486648 | 0.583514 | 6.505036 | 6.02153  | 5.565851 | 4.464254 | 0        | 5.024897 |
| 18220 | MSANTD1   | 18.11715 | -0.8571  | 0.660082 | -1.29848 | 0.194122 | 0.283245 | 26.56223 | 15.32753 | 27.13352 | 13.39276 | 19.252   | 7.034856 |
| 15284 | LOC103245 | 31.19057 | -0.85729 | 0.480922 | -1.7826  | 0.074652 | 0.12985  | 36.31979 | 49.26706 | 34.78657 | 17.85702 | 27.80844 | 21.10457 |
| 3788  | RPS25     | 21701.27 | -0.85738 | 0.154315 | -5.556   | 2.76E-08 | 1.94E-07 | 31510.4  | 19961.92 | 32427.34 | 15600.34 | 15221.91 | 15485.73 |
| 10866 | LOC103245 | 71.96211 | -0.85748 | 0.322849 | -2.65597 | 0.007908 | 0.019345 | 98.65972 | 91.96518 | 86.27069 | 64.73168 | 44.92132 | 45.22408 |
| 1159  | TAF4A     | 5089.077 | -0.85825 | 0.083385 | -10.2927 | 7.60E-25 | 1.74E-23 | 6657.363 | 6600.692 | 6422.992 | 3656.224 | 3520.976 | 3676.215 |
| 2089  | FAM133B   | 2236.425 | -0.85845 | 0.1099   | -7.81118 | 5.67E-15 | 7.21E-14 | 2780.361 | 3195.79  | 2669.521 | 1571.417 | 1657.811 | 1543.648 |
| 18105 | LOC103245 | 16.71834 | -0.85851 | 0.650454 | -1.31987 | 0.186879 | 0.274414 | 26.56223 | 19.15941 | 18.08902 | 15.62489 | 12.83466 | 8.039836 |
| 22214 | LOC103235 | 4.549733 | -0.85862 | 1.244816 | -0.88975 | 0.490348 | 0.586812 | 5.96295  | 4.379295 | 7.653045 | 0        | 4.278221 | 5.024897 |
| 10663 | LOC103235 | 143.5361 | -0.85899 | 0.318103 | -2.70035 | 0.006927 | 0.01727  | 211.4137 | 107.8401 | 234.4615 | 120.5349 | 100.5382 | 86.42823 |
| 22753 | LOC119625 | 2.990325 | -0.85919 | 1.430767 | -0.60051 | 0.548165 | 0.640486 | 2.710432 | 3.284471 | 5.565851 | 2.232127 | 2.139111 | 2.009959 |
| 2809  | TBC1D4    | 1119.456 | -0.8592  | 0.128526 | -6.68504 | 2.31E-11 | 2.18E-10 | 1392.078 | 1562.313 | 1382.418 | 783.4766 | 708.0456 | 888.4019 |
| 2640  | HMOX2     | 1146.55  | -0.85922 | 0.124214 | -6.9     |          |          |          |          |          |          |          |          |



|       |           |          |          |          |          |          |          |          |          |          |          |          |          |
|-------|-----------|----------|----------|----------|----------|----------|----------|----------|----------|----------|----------|----------|----------|
| 1819  | BTG3      | 2721.588 | -0.86006 | 0.10235  | -8.40313 | 4.35E-17 | 6.35E-16 | 3311.064 | 3770.573 | 3444.566 | 1866.058 | 2059.964 | 1877.302 |
| 10697 | TTYH2     | 73.28412 | -0.8601  | 0.3194   | -2.69286 | 0.007084 | 0.017606 | 96.49137 | 93.60742 | 95.3152  | 51.33892 | 40.6431  | 62.30873 |
| 17641 | ETV7      | 19.11121 | -0.86019 | 0.614676 | -1.39942 | 0.161687 | 0.243662 | 25.47806 | 24.63353 | 22.95914 | 11.16063 | 21.39111 | 9.044815 |
| 3382  | CENPF     | 23009.73 | -0.86058 | 0.144445 | -5.95786 | 2.56E-09 | 2.01E-08 | 25482.4  | 37869.4  | 25678.75 | 15912.83 | 15795.19 | 17319.82 |
| 22466 | LOC119621 | 3.511568 | -0.86074 | 1.33151  | -0.64644 | 0.517993 | 0.612964 | 4.878777 | 6.02153  | 2.782925 | 2.232127 | 2.139111 | 3.014938 |
| 15700 | LOC103224 | 28.33722 | -0.86083 | 0.501736 | -1.71571 | 0.086215 | 0.145899 | 38.48813 | 27.918   | 43.13534 | 18.57502 | 23.53022 | 19.09461 |
| 2395  | COIL      | 1251.696 | -0.86086 | 0.118285 | -7.27787 | 3.39E-13 | 3.76E-12 | 1561.751 | 1783.468 | 1499.997 | 863.8331 | 885.5918 | 915.5363 |
| 20611 | LOC119615 | 7.976163 | -0.861   | 0.92057  | -0.93529 | 0.349638 | 0.450979 | 14.63633 | 6.568942 | 9.740239 | 4.464254 | 6.417332 | 6.029877 |
| 2233  | SPRED1    | 2790.993 | -0.86101 | 0.114206 | -7.5391  | 4.73E-14 | 5.63E-13 | 3409.181 | 4105.589 | 3285.244 | 1926.326 | 2025.738 | 1993.879 |
| 7150  | LOC103245 | 333.8839 | -0.86121 | 0.233974 | -3.68081 | 0.000232 | 0.000864 | 389.218  | 581.3513 | 318.645  | 258.9267 | 248.1368 | 207.0258 |
| 17373 | LOC103226 | 47.17796 | -0.86139 | 0.599964 | -1.43574 | 0.151075 | 0.231183 | 93.23886 | 20.25424 | 69.57314 | 49.10679 | 10.69555 | 40.19918 |
| 12388 | LOC119622 | 84.00182 | -0.86196 | 0.370739 | -2.32497 | 0.020074 | 0.043078 | 150.7    | 68.42648 | 107.8384 | 51.33892 | 51.33866 | 74.36848 |
| 2870  | LSP1      | 880.0002 | -0.862   | 0.13087  | -6.58673 | 4.50E-11 | 4.16E-10 | 1031.048 | 1214.707 | 1157.001 | 687.4951 | 596.8119 | 592.9379 |
| 17399 | LOC119624 | 18.04637 | -0.86214 | 0.603142 | -1.42942 | 0.152883 | 0.233589 | 21.68345 | 24.08612 | 24.3506  | 13.39276 | 10.69555 | 14.06971 |
| 20312 | LOC103230 | 8.894636 | -0.86218 | 0.883048 | -0.97637 | 0.328879 | 0.430448 | 11.38381 | 12.59047 | 10.43597 | 2.232127 | 10.69555 | 6.029877 |
| 1267  | DHX40     | 7733.532 | -0.86221 | 0.086716 | -9.94287 | 2.71E-23 | 5.68E-22 | 10229.71 | 9365.669 | 10339.96 | 5372.73  | 5578.801 | 5514.322 |
| 1357  | POGLUT2   | 3654.281 | -0.86258 | 0.088943 | -9.69809 | 3.07E-22 | 6.02E-21 | 4889.619 | 4646.979 | 4612.699 | 2502.214 | 2613.993 | 2660.181 |
| 3550  | LRATD1    | 433.7716 | -0.86265 | 0.148627 | -5.8041  | 6.47E-09 | 4.85E-08 | 531.2446 | 583.541  | 562.8467 | 299.105  | 329.423  | 296.4689 |
| 23129 | LOC119618 | 2.872063 | -0.86269 | 1.598158 | -0.5398  | 0.589333 | 0.677409 | 2.168345 | 4.379295 | 4.174388 | 2.232127 | 4.278221 | 0        |
| 4718  | LOC119627 | 277.4561 | -0.86298 | 0.177175 | -4.87078 | 1.11E-06 | 6.26E-06 | 355.0666 | 337.2057 | 381.2608 | 214.2842 | 183.9635 | 192.9561 |
| 18446 | CREB3L1   | 18.96644 | -0.8632  | 0.686405 | -1.25757 | 0.208546 | 0.300563 | 14.63633 | 34.48694 | 23.65487 | 24.5534  | 6.417332 | 10.04979 |
| 11307 | LOC103233 | 84.65276 | -0.86334 | 0.337696 | -2.55657 | 0.010571 | 0.024853 | 126.8482 | 91.96518 | 105.7512 | 71.42806 | 72.72976 | 39.1942  |
| 21857 | CHN2      | 4.90813  | -0.86346 | 1.149195 | -0.75136 | 0.452436 | 0.550304 | 5.420864 | 4.926706 | 8.348776 | 4.464254 | 4.278221 | 2.009959 |
| 12601 | LOC119618 | 61.07839 | -0.86352 | 0.378232 | -2.28305 | 0.022428 | 0.047317 | 86.19173 | 71.16354 | 79.31338 | 24.5534  | 62.03421 | 43.21412 |
| 17324 | LOC103227 | 25.97556 | -0.86385 | 0.598018 | -1.44453 | 0.148591 | 0.228024 | 35.7777  | 41.05589 | 22.2634  | 15.62489 | 32.08666 | 9.044815 |
| 1502  | UBE2C     | 2232.623 | -0.86414 | 0.093461 | -9.2459  | 2.33E-20 | 4.13E-19 | 2883.357 | 2911.683 | 2855.282 | 1553.56  | 1548.716 | 1643.141 |
| 20044 | LOC119625 | 9.452551 | -0.86444 | 0.846521 | -1.02116 | 0.307177 | 0.407419 | 15.7205  | 12.59047 | 8.348776 | 4.464254 | 8.556443 | 7.034856 |
| 1729  | SEL1L3    | 11345.92 | -0.86447 | 0.100026 | -8.64245 | 5.50E-18 | 8.46E-17 | 14176.1  | 16080.77 | 13691.3  | 7799.052 | 7696.52  | 8631.769 |
| 1996  | CST3      | 14573.41 | -0.86458 | 0.108016 | -8.00416 | 1.20E-15 | 1.60E-14 | 17293.64 | 21313.48 | 17839.25 | 10502.16 | 9593.911 | 10898    |
| 3173  | LOC103227 | 6126.264 | -0.86458 | 0.139604 | -6.19311 | 5.90E-10 | 4.94E-09 | 7950.781 | 6294.141 | 9479.34  | 4642.824 | 4293.195 | 4097.301 |
| 20418 | CCDC87    | 8.847055 | -0.86476 | 0.902245 | -0.95846 | 0.337831 | 0.439828 | 16.80468 | 6.568942 | 10.43597 | 6.696381 | 8.556443 | 4.019918 |
| 6462  | LOC103230 | 176.9796 | -0.86485 | 0.218686 | -3.95475 | 7.66E-05 | 0.000315 | 206.5349 | 249.6198 | 227.5042 | 142.8561 | 119.7902 | 115.5726 |
| 10356 | LOC103214 | 103.4862 | -0.86491 | 0.311673 | -2.77505 | 0.005519 | 0.014169 | 157.205  | 93.60742 | 148.8865 | 69.19594 | 87.70354 | 64.31869 |
| 5310  | EEF2KMT   | 400.8342 | -0.86524 | 0.191719 | -4.51306 | 6.39E-06 | 3.20E-05 | 619.6047 | 409.464  | 524.5815 | 301.3371 | 254.5542 | 295.464  |
| 2026  | SLC24A2   | 8914.603 | -0.86532 | 0.109251 | -7.92048 | 2.37E-15 | 3.10E-14 | 10869.37 | 12995.01 | 10674.61 | 6069.153 | 6036.57  | 6842.905 |
| 14635 | MALRD1    | 32.78429 | -0.8656  | 0.455542 | -1.90016 | 0.057412 | 0.104291 | 41.19856 | 45.43518 | 39.65669 | 26.78552 | 23.53022 | 20.09959 |
| 21312 | OLFM1     | 5.955728 | -0.86599 | 1.041886 | -0.83118 | 0.405874 | 0.506296 | 6.505036 | 8.211177 | 8.348776 | 2.232127 | 6.417332 | 4.019918 |
| 4890  | LOC103244 | 583.8753 | -0.8662  | 0.182433 | -4.74805 | 2.05E-06 | 1.12E-05 | 800.1195 | 579.7091 | 882.1874 | 464.2824 | 367.927  | 409.0266 |
| 9161  | LOC119627 | 241.3709 | -0.86632 | 0.2828   | -3.06337 | 0.002189 | 0.006351 | 387.0497 | 204.1846 | 348.5614 | 131.6955 | 147.5986 | 229.1353 |
| 21335 | LOC119626 | 6.517737 | -0.86635 | 1.048215 | -0.8265  | 0.408521 | 0.509048 | 13.01007 | 3.284471 | 9.044508 | 4.464254 | 4.278221 | 5.024897 |
| 1984  | LIFR      | 2512.846 | -0.86673 | 0.10798  | -8.02679 | 1.00E-15 | 1.34E-14 | 3106.697 | 3576.789 | 3058.435 | 1691.952 | 1766.905 | 1876.297 |
| 10522 | LOC103245 | 81.93889 | -0.86681 | 0.316432 | -2.73933 | 0.006156 | 0.015555 | 87.81799 | 123.1677 | 105.7512 | 71.42806 | 49.19955 | 54.26889 |
| 13046 | LOC103214 | 52.42672 | -0.86713 | 0.394771 | -2.19653 | 0.028054 | 0.057168 | 75.89209 | 60.76271 | 68.87741 | 24.5534  | 34.22577 | 50.24897 |
| 3502  | DTWD1     | 504.5123 | -0.86736 | 0.148217 | -5.85196 | 4.86E-09 | 3.69E-08 | 636.9515 | 691.9285 | 621.2881 | 388.3901 | 367.927  | 320.5885 |
| 14296 | LOC103238 | 42.73437 | -0.86755 | 0.442106 | -1.9623  | 0.049727 | 0.092473 | 69.92914 | 55.28859 | 41.04815 | 35.71403 | 19.252   | 35.17428 |
| 19943 | TRNAK-UU  | 13.77527 | -0.86759 | 0.834812 | -1.03926 | 0.298685 | 0.398161 | 16.80468 | 22.9913  | 14.61036 | 11.16063 | 0        | 17.08465 |
| 3058  | LOC103235 | 2193.524 | -0.86774 | 0.137106 | -6.32893 | 2.47E-10 | 2.15E-09 | 3144.643 | 2317.194 | 3045.216 | 1537.935 | 1426.787 | 1689.37  |
| 19742 | LOC119625 | 11.75196 | -0.86783 | 0.817601 | -1.06143 | 0.288495 | 0.388474 | 9.215468 | 17.51718 | 18.08902 | 6.696381 | 14.97377 | 4.019918 |
| 18648 | LOC103247 | 13.46706 | -0.86831 | 0.703998 | -1.23339 | 0.217429 | 0.309971 | 19.51511 | 13.13788 | 19.48048 | 8.928508 | 10.69555 | 9.044815 |
| 8849  | LOC119627 | 277.6539 | -0.86849 | 0.275081 | -3.15722 | 0.001593 | 0.004785 | 442.8846 | 201.995  | 432.0492 | 200.8914 | 186.1026 | 202.0009 |
| 4518  | RPS14     | 31564.53 | -0.86851 | 0.173645 | -5.00166 | 5.68E-07 | 3.34E-06 | 46404.22 | 26891.06 | 49069.93 | 22935.1  | 22477.77 | 21609.07 |
| 1354  | EIF3K     | 7140.533 | -0.86852 | 0.089474 | -9.70699 | 2.82E-22 | 5.53E-21 | 9586.797 | 8666.624 | 9432.726 | 5091.482 | 4838.668 | 5226.898 |
| 3767  | SYT9      | 587.7226 | -0.86853 | 0.155724 | -5.57735 | 2.44E-08 | 1.72E-07 | 744.2846 | 849.5831 | 687.3826 | 352.6761 | 449.2132 | 443.1959 |
| 1740  | AJUBA     | 7880.713 | -0.86893 | 0.100811 | -8.61933 | 6.73E-18 | 1.03E-16 | 10657.96 | 9735.719 | 10171.59 | 5392.819 | 5144.561 | 6181.629 |
| 3620  | FYP7      | 423.1497 | -0.86895 | 0.151951 | -5.71861 | 1.07E-08 | 7.89E-08 | 580.5745 | 530.442  | 532.9302 | 285.7123 | 286.6408 | 322.5984 |
| 9568  | CZPD27B1  | 93.35777 | -0.86923 | 0.292872 | -2.96795 | 0.002998 | 0.00833  | 134.9795 | 101.2712 | 127.3188 | 58.0353  | 64.17332 | 74.36848 |
| 6348  | LOC103215 | 158.9013 | -0.86955 | 0.217014 | -4.00686 | 6.15E-05 | 0.000258 | 209.7874 | 197.6157 | 208.0237 | 116.0706 | 113.3729 | 108.5378 |
| 6110  | LOC119618 | 282.0347 | -0.86961 | 0.211344 | -4.11468 | 3.88E-05 | 0.000169 | 422.2853 | 277.5378 | 394.4797 | 185.2665 | 209.6328 | 203.0059 |
| 22397 | TRNAI-UAI | 3.54482  | -0.86967 | 1.32175  | -0.65797 | 0.510559 | 0.606028 | 4.336691 | 3.284471 | 6.261582 | 2.232127 | 2.139111 | 3.014938 |
| 1611  | RBSN      | 4018.893 | -0.87032 | 0.097257 | -8.94869 | 3.60E-19 | 5.94E-18 | 5413.274 | 5288.546 | 4892.383 | 2683.017 | 2800.096 | 3036.043 |
| 16220 | LOC119625 | 30.05451 | -0.87038 | 0.536113 | -1.6235  | 0.104482 | 0.171249 | 24.93597 | 58.02565 | 34.09084 | 15.62489 | 23.53022 | 24.11951 |
| 3090  | FAM193A   | 839.1803 | -0.87038 | 0.138401 | -6.28884 | 3.20E-10 | 2.75E-09 | 1018.038 | 1230.582 | 1001.853 | 633.9241 | 598.951  | 551.7337 |
| 1970  | MCM10     | 3088.068 | -0.87079 | 0.108204 | -8.04769 | 8.44E-16 | 1.14E-14 | 3826.588 | 4438.415 | 3717.988 | 2120.521 | 2113.441 | 2311.453 |
| 8145  | LOC103215 | 130.3881 | -0.871   | 0.258775 | -3.36587 | 0.000763 | 0.00249  | 190.8144 | 155.465  | 157.2353 | 87.05295 | 113.3729 | 78.3884  |
| 6419  | LOC103247 | 202.1293 | -0.8714  | 0.219326 | -3.97306 | 7.10E-05 | 0.000294 | 215.7504 | 293.4127 | 275.5096 | 127.2312 | 156.1551 | 144.717  |
| 22464 | LOC103245 | 3.915223 | -0.87157 | 1.347589 | -0.64676 | 0.517787 | 0.612774 | 5.96295  | 4.926706 | 4.174388 | 0        | 6.417332 | 2.009959 |
| 1236  | UBA2      | 9733.281 | -0.87188 | 0.086891 | -10.0342 | 5.10E-23 | 2.32E-22 | 13305.51 | 11887.59 | 12374.65 | 6843.701 | 6723.225 | 7065.006 |
| 3337  | LOC119618 | 444.5424 | -0.87188 | 0.145159 | -6.00642 | 1.90E-09 | 1.51E-08 | 575.6957 | 586.8255 | 559.368  | 325.8905 | 323.0057 | 296.4689 |
| 9752  | LOC103245 | 114.0644 | -0.872   | 0.29901  | -2.91628 | 0.003542 | 0.009657 | 185.9356 | 104.0082 | 152.3652 | 78.12444 | 85.56443 | 78.3884  |
| 3037  | MRPL12    | 2399.961 | -0.8721  | 0.137189 | -6.35692 | 2.06E-10 | 1.80E-09 | 3335.457 | 2468.827 | 3507.878 | 1        |          |          |



|       |           |          |          |          |          |          |          |          |          |          |          |          |          |
|-------|-----------|----------|----------|----------|----------|----------|----------|----------|----------|----------|----------|----------|----------|
| 3656  | PBX3      | 539.5164 | -0.87375 | 0.15348  | -5.69291 | 1.25E-08 | 9.08E-08 | 681.9447 | 791.5575 | 622.6796 | 381.6937 | 357.2315 | 401.9918 |
| 10162 | CUNH21or  | 85.94597 | -0.87404 | 0.309603 | -2.8231  | 0.004756 | 0.012443 | 134.9795 | 91.96518 | 107.8384 | 55.80317 | 57.75599 | 67.33362 |
| 16943 | LOC10323  | 25.55997 | -0.87413 | 0.582575 | -1.50046 | 0.133496 | 0.209467 | 26.02015 | 53.09895 | 20.17621 | 17.85702 | 17.11289 | 19.09461 |
| 1693  | HTT       | 7621.617 | -0.87429 | 0.099947 | -8.74752 | 2.18E-18 | 3.42E-17 | 9680.578 | 10089.35 | 9829.989 | 5258.891 | 4894.285 | 5976.613 |
| 2172  | NOC3L     | 2980.214 | -0.87476 | 0.114223 | -7.65834 | 1.88E-14 | 2.31E-13 | 3575.06  | 4413.234 | 3584.408 | 2104.896 | 2044.99  | 2158.696 |
| 16175 | LCT       | 34.08772 | -0.87494 | 0.536391 | -1.63116 | 0.102857 | 0.169054 | 48.24569 | 39.41365 | 42.43961 | 29.01765 | 36.36488 | 9.044815 |
| 3464  | FAM149A   | 802.6889 | -0.8753  | 0.1485   | -5.89426 | 3.76E-09 | 2.89E-08 | 941.0619 | 1216.896 | 962.8922 | 540.1747 | 539.0559 | 616.0524 |
| 8774  | CFAP43    | 112.7505 | -0.87544 | 0.275207 | -3.18101 | 0.001468 | 0.004447 | 159.9155 | 156.5598 | 119.6658 | 75.89232 | 94.12087 | 70.34856 |
| 4607  | ACOX3     | 464.0078 | -0.87558 | 0.177273 | -4.93913 | 7.85E-07 | 4.53E-06 | 649.9616 | 526.0628 | 632.4198 | 270.0874 | 316.5884 | 388.9271 |
| 17277 | LOC11962  | 19.43468 | -0.87582 | 0.602456 | -1.45375 | 0.146016 | 0.224682 | 25.47806 | 29.01283 | 20.87194 | 8.928508 | 19.252   | 13.06473 |
| 16225 | CFAP92    | 28.24713 | -0.8762  | 0.539853 | -1.62303 | 0.104583 | 0.171362 | 47.16151 | 25.18094 | 36.17803 | 20.08914 | 27.80844 | 13.06473 |
| 3556  | KIAA1958  | 534.6771 | -0.87626 | 0.151049 | -5.8012  | 6.58E-09 | 4.92E-08 | 699.2914 | 743.3852 | 637.9857 | 383.9258 | 329.423  | 414.0515 |
| 3757  | PUM3      | 3687.878 | -0.87627 | 0.156875 | -5.58576 | 2.33E-08 | 1.65E-07 | 4164.85  | 6207.103 | 3950.363 | 2720.963 | 2543.403 | 2540.588 |
| 1450  | PLK2      | 38121.49 | -0.87631 | 0.093598 | -9.36251 | 7.79E-21 | 1.43E-19 | 47673.24 | 54164.21 | 46234.13 | 26939.54 | 25844.74 | 27873.11 |
| 2193  | LYRM4     | 986.1616 | -0.8765  | 0.114979 | -7.6232  | 2.47E-14 | 3.00E-13 | 1242.462 | 1324.737 | 1264.84  | 720.977  | 652.4288 | 711.5255 |
| 8622  | LOC10323  | 128.9784 | -0.87658 | 0.271986 | -3.22287 | 0.001269 | 0.003913 | 164.7943 | 175.7192 | 156.5396 | 95.98146 | 115.512  | 65.32367 |
| 2637  | PLK4      | 2258.343 | -0.87658 | 0.126686 | -6.91928 | 4.54E-12 | 4.58E-11 | 2683.87  | 3422.419 | 2665.347 | 1506.686 | 1689.897 | 1581.838 |
| 3134  | TAPT1     | 586.6471 | -0.87673 | 0.140508 | -6.23967 | 4.39E-10 | 3.72E-09 | 733.4429 | 815.6436 | 733.3009 | 372.7652 | 423.5439 | 441.186  |
| 1130  | PPP1CC    | 7018.93  | -0.87678 | 0.084361 | -10.3933 | 2.66E-25 | 6.26E-24 | 9414.414 | 8743.261 | 9109.211 | 4796.841 | 5061.136 | 4988.718 |
| 1750  | FKBP10    | 18020.95 | -0.87684 | 0.102036 | -8.59339 | 8.44E-18 | 1.28E-16 | 22477.61 | 25389.51 | 22145.13 | 12725.36 | 11589.7  | 13798.37 |
| 1989  | HELLS     | 7267.956 | -0.8769  | 0.109343 | -8.0197  | 1.06E-15 | 1.42E-14 | 9101.63  | 10612.67 | 8524.101 | 4794.609 | 5148.839 | 5425.884 |
| 20730 | TRNAV-CA  | 7.525743 | -0.87731 | 0.96018  | -0.91369 | 0.360879 | 0.462806 | 14.63633 | 5.474118 | 9.044508 | 6.696381 | 4.278221 | 5.024897 |
| 3468  | H2AFJ     | 1550.819 | -0.87735 | 0.148957 | -5.88993 | 3.86E-09 | 2.96E-08 | 2215.507 | 1561.766 | 2249.995 | 1069.189 | 1073.834 | 1134.622 |
| 1421  | TUBB      | 51914.44 | -0.87754 | 0.092777 | -9.4586  | 3.12E-21 | 5.84E-20 | 65785.98 | 72524.95 | 63397.83 | 36162.69 | 34696.38 | 38918.83 |
| 1668  | MRPL48    | 3954.64  | -0.87758 | 0.099693 | -8.80284 | 1.33E-18 | 2.13E-17 | 4964.969 | 5584.148 | 4810.982 | 2821.409 | 2877.104 | 2669.225 |
| 7852  | LOC10323  | 126.3607 | -0.87782 | 0.254255 | -3.45254 | 0.000555 | 0.00188  | 156.663  | 171.3399 | 161.4097 | 78.12444 | 111.2338 | 79.39338 |
| 1793  | UTP18     | 2537.961 | -0.87793 | 0.103615 | -8.47302 | 2.39E-17 | 3.55E-16 | 3467.184 | 3063.317 | 3333.945 | 1859.362 | 1657.811 | 1846.147 |
| 4443  | CLTCL1    | 418.6123 | -0.87799 | 0.17392  | -5.04825 | 4.46E-07 | 2.67E-06 | 613.6418 | 451.0673 | 564.2381 | 287.9444 | 280.2235 | 314.5586 |
| 11799 | LOC10322  | 67.90675 | -0.87806 | 0.358478 | -2.4494  | 0.01431  | 0.032242 | 107.8752 | 68.97389 | 88.35788 | 33.4819  | 53.47777 | 55.27387 |
| 4985  | LOC10324  | 495.2934 | -0.87822 | 0.187002 | -4.69631 | 2.65E-06 | 1.41E-05 | 571.9011 | 816.191  | 535.7132 | 343.7476 | 361.5097 | 342.698  |
| 15222 | SYCE2     | 30.06521 | -0.87822 | 0.490106 | -1.79191 | 0.073148 | 0.127752 | 47.7036  | 38.86624 | 29.91645 | 24.5534  | 19.252   | 20.09959 |
| 1805  | DUSP14    | 3203.098 | -0.87834 | 0.10411  | -8.43668 | 3.26E-17 | 4.81E-16 | 4319.344 | 3935.344 | 4202.217 | 2180.788 | 2100.607 | 2480.289 |
| 5867  | LOC10324  | 204.8602 | -0.87849 | 0.207514 | -4.23341 | 2.30E-05 | 0.000104 | 299.7738 | 246.8827 | 251.159  | 145.0883 | 130.4858 | 155.7718 |
| 9576  | LOC11961  | 166.6656 | -0.87868 | 0.296182 | -2.9667  | 0.00301  | 0.008357 | 160.9997 | 315.8566 | 171.8456 | 107.1421 | 115.512  | 128.6374 |
| 2164  | HIST2H2BE | 9417.244 | -0.87902 | 0.114684 | -7.66473 | 1.79E-14 | 2.20E-13 | 12773.18 | 10332.4  | 13499.97 | 6676.292 | 6310.376 | 6911.244 |
| 2923  | RRP12     | 3285.571 | -0.87978 | 0.134935 | -6.52003 | 7.03E-11 | 6.39E-10 | 4744.882 | 3728.969 | 4308.664 | 2120.521 | 2089.911 | 2720.479 |
| 2030  | PFKFB2    | 1037.714 | -0.88018 | 0.111257 | -7.91127 | 2.55E-15 | 3.34E-14 | 1357.926 | 1337.327 | 1339.283 | 694.1915 | 767.9407 | 729.6151 |
| 6230  | ZC3H8     | 386.4046 | -0.88027 | 0.216689 | -4.06234 | 4.86E-05 | 0.000207 | 422.8274 | 651.9675 | 424.3961 | 258.9267 | 325.1448 | 235.1652 |
| 10574 | LOC11962  | 90.8664  | -0.88038 | 0.322695 | -2.72822 | 0.006368 | 0.016009 | 131.1849 | 83.75401 | 137.0591 | 75.89232 | 62.03421 | 55.27387 |
| 6525  | LOC10324  | 221.9185 | -0.8807  | 0.224166 | -3.92881 | 8.54E-05 | 0.000348 | 319.831  | 247.4301 | 300.556  | 131.6955 | 139.0422 | 192.9561 |
| 8379  | GALNT16   | 110.8996 | -0.88083 | 0.267726 | -3.29005 | 0.001002 | 0.003178 | 140.4004 | 153.2753 | 134.9719 | 82.5887  | 89.84265 | 64.31869 |
| 19333 | GPR87     | 11.69115 | -0.88105 | 0.779965 | -1.1296  | 0.258644 | 0.355665 | 18.97302 | 10.40082 | 16.69755 | 4.464254 | 8.556443 | 11.05477 |
| 13544 | LOC10324  | 48.85166 | -0.88119 | 0.419622 | -2.09997 | 0.035731 | 0.070135 | 46.07734 | 76.09024 | 66.09448 | 37.94616 | 42.78221 | 24.11951 |
| 4601  | LOC11962  | 379.196  | -0.88178 | 0.178403 | -4.94262 | 7.71E-07 | 4.45E-06 | 571.9011 | 424.2442 | 480.7504 | 241.0697 | 273.8062 | 283.4042 |
| 2387  | ARHGEF39  | 808.0199 | -0.882   | 0.120992 | -7.28979 | 3.10E-13 | 3.46E-12 | 1095.014 | 1007.785 | 1040.814 | 542.4069 | 588.2554 | 573.8433 |
| 14781 | DUSP2     | 44.88945 | -0.8822  | 0.470124 | -1.87652 | 0.060583 | 0.108957 | 61.79785 | 36.12918 | 75.13899 | 31.24978 | 44.92132 | 20.09959 |
| 1595  | RACK1     | 110185   | -0.88222 | 0.098102 | -8.99291 | 2.41E-19 | 4.01E-18 | 151601.5 | 127338.4 | 149651.8 | 78729.35 | 73337.27 | 80451.62 |
| 21028 | LOC10322  | 6.56042  | -0.88226 | 1.006752 | -0.87635 | 0.380842 | 0.481485 | 12.46799 | 5.474118 | 7.653045 | 4.464254 | 4.278221 | 5.024897 |
| 3729  | ARL13B    | 2132.484 | -0.88231 | 0.157182 | -5.61333 | 1.98E-08 | 1.41E-07 | 2422.042 | 3533.543 | 2336.266 | 1504.454 | 1593.637 | 1404.961 |
| 2337  | TSPAN2    | 1032.898 | -0.88246 | 0.119947 | -7.35709 | 1.88E-13 | 2.14E-12 | 1426.771 | 1228.94  | 1363.633 | 743.2983 | 693.0719 | 741.6748 |
| 2499  | FAM114A1  | 3325.487 | -0.88268 | 0.123707 | -7.13523 | 9.66E-13 | 1.03E-11 | 4036.917 | 5000.06  | 3903.053 | 2408.465 | 2124.137 | 2480.289 |
| 17934 | ERMN      | 16.00191 | -0.88338 | 0.652216 | -1.35443 | 0.175598 | 0.260302 | 16.80468 | 22.9913  | 22.2634  | 8.928508 | 14.97377 | 10.04979 |
| 2363  | COX11     | 2341.361 | -0.88348 | 0.12062  | -7.32446 | 2.40E-13 | 2.70E-12 | 3203.188 | 2585.426 | 3319.334 | 1678.559 | 1672.785 | 1588.873 |
| 2382  | SRBD1     | 3846.607 | -0.88433 | 0.121127 | -7.30084 | 2.86E-13 | 3.19E-12 | 4593.64  | 5878.108 | 4499.295 | 2651.767 | 2693.14  | 2763.694 |
| 8913  | LOC10321  | 100.6987 | -0.88449 | 0.281602 | -3.14093 | 0.001684 | 0.005023 | 149.0738 | 124.2625 | 120.3615 | 69.19594 | 59.8951  | 81.40334 |
| 20844 | LOC10323  | 7.045066 | -0.88449 | 0.983893 | -0.89897 | 0.368667 | 0.470192 | 7.589209 | 9.853413 | 9.740239 | 8.928508 | 2.139111 | 4.019918 |
| 19162 | LOC11962  | 12.34026 | -0.88485 | 0.763628 | -1.15874 | 0.24656  | 0.342083 | 15.7205  | 14.23271 | 17.39328 | 6.696381 | 14.97377 | 5.024897 |
| 17102 | LOC11962  | 47.99656 | -0.8849  | 0.597471 | -1.48107 | 0.138587 | 0.215434 | 25.47806 | 127.547  | 33.39511 | 46.87467 | 23.53022 | 31.15436 |
| 19506 | SPATA25   | 11.76154 | -0.88536 | 0.804779 | -1.10013 | 0.271276 | 0.369725 | 19.51511 | 12.59047 | 14.61036 | 2.232127 | 8.556443 | 13.06473 |
| 8584  | LOC10323  | 106.9658 | -0.88536 | 0.273793 | -3.2337  | 0.001222 | 0.003785 | 144.7371 | 134.1159 | 140.5377 | 62.49956 | 68.45154 | 91.45313 |
| 2038  | PHKA1     | 2003.853 | -0.8855  | 0.112135 | -7.89675 | 2.86E-15 | 3.73E-14 | 2459.446 | 2894.166 | 2450.366 | 1388.383 | 1360.474 | 1470.285 |
| 10847 | LOC11962  | 82.69436 | -0.88603 | 0.332952 | -2.66115 | 0.007788 | 0.019087 | 134.4374 | 82.11177 | 103.664  | 60.26743 | 68.45154 | 47.23404 |
| 6782  | TEN1      | 332.2696 | -0.88659 | 0.231805 | -3.82472 | 0.000131 | 0.000513 | 528.5342 | 286.2964 | 479.3589 | 234.3733 | 228.8848 | 236.1702 |
| 23425 | LOC10323  | 2.047947 | -0.88662 | 1.788913 | -0.49562 | 0.620164 | 0.703824 | 1.626259 | 1.642235 | 4.87012  | 0        | 2.139111 | 2.009959 |
| 3750  | ZBTB49    | 427.3863 | -0.88674 | 0.158539 | -5.59322 | 2.23E-08 | 1.58E-07 | 549.1335 | 599.9633 | 515.5369 | 265.6231 | 331.5622 | 302.4988 |
| 14594 | LOC10323  | 42.72396 | -0.88779 | 0.465351 | -1.90778 | 0.056419 | 0.102775 | 43.909   | 77.73248 | 45.91827 | 33.4819  | 17.11289 | 38.18922 |
| 13388 | SLC45A1   | 51.7495  | -0.88813 | 0.41703  | -2.12967 | 0.033199 | 0.065926 | 69.38706 | 70.06871 | 59.8329  | 33.4819  | 55.61688 | 22.10955 |
| 8502  | LOC10321  | 101.7434 | -0.88854 | 0.272899 | -3.25591 | 0.00113  | 0.003534 | 142.0266 | 120.978  | 134.9719 | 62.49956 | 70.59065 | 79.39338 |
| 2591  | ATF3      | 777.6683 | -0.88876 | 0.127091 | -6.99307 | 2.69E-12 | 2.76E-11 | 1047.311 | 968.3715 | 1017.159 | 491.0679 | 573.2817 | 568.8184 |
| 1487  | TGIF1     | 5331.859 | -0.88895 | 0.095679 | -9.2909  | 1.53E-20 | 2.74E-19 | 6771.201 | 7532.934 | 6470.997 | 3745.509 | 3653.601 | 3816.912 |
| 2476  | USP44     | 1139.702 | -0.88917 | 0.12425  | -7.15632 | 8.29E-13 | 8.90     |          |          |          |          |          |          |



|       |           |          |          |          |          |          |          |          |          |          |          |          |          |
|-------|-----------|----------|----------|----------|----------|----------|----------|----------|----------|----------|----------|----------|----------|
| 14328 | LOC119621 | 35.73545 | -0.89    | 0.454938 | -1.9563  | 0.05043  | 0.09357  | 44.99317 | 50.9093  | 42.43961 | 35.71403 | 19.252   | 21.10457 |
| 17190 | CYRIA     | 20.81817 | -0.89075 | 0.606293 | -1.46917 | 0.141786 | 0.219277 | 29.27266 | 29.01283 | 21.56767 | 15.62489 | 21.39111 | 8.039836 |
| 10513 | LOC103241 | 80.02099 | -0.89095 | 0.324977 | -2.74157 | 0.006115 | 0.015463 | 111.1277 | 91.41777 | 112.0128 | 53.57105 | 40.6431  | 71.35354 |
| 2097  | SUPT4H1   | 1568.263 | -0.89126 | 0.114267 | -7.79976 | 6.20E-15 | 7.86E-14 | 2122.81  | 1854.631 | 2138.678 | 1140.617 | 1018.217 | 1134.622 |
| 18506 | LOC119618 | 15.02957 | -0.89137 | 0.712911 | -1.25033 | 0.211178 | 0.303371 | 25.47806 | 10.40082 | 22.2634  | 11.16063 | 12.83466 | 8.039836 |
| 2752  | ANKRD44   | 655.7595 | -0.89143 | 0.131661 | -6.77068 | 1.28E-11 | 1.24E-10 | 834.813  | 916.3674 | 804.2655 | 453.1218 | 472.7435 | 453.2457 |
| 11819 | NR4A1     | 59.71917 | -0.89163 | 0.364483 | -2.44396 | 0.014527 | 0.032677 | 85.10756 | 71.16354 | 74.44326 | 55.80317 | 40.6431  | 31.15436 |
| 3574  | NUBP1     | 446.4968 | -0.89173 | 0.154282 | -5.77989 | 7.47E-09 | 5.56E-08 | 571.9011 | 616.9331 | 556.5851 | 301.3371 | 284.5017 | 347.7229 |
| 19942 | LOC119621 | 11.3152  | -0.89225 | 0.858371 | -1.03946 | 0.29859  | 0.398055 | 17.88885 | 11.49565 | 13.91463 | 4.464254 | 17.11289 | 3.014938 |
| 1949  | WDR3      | 3395.071 | -0.89234 | 0.11019  | -8.09818 | 5.58E-16 | 7.61E-15 | 4331.812 | 4865.944 | 4046.374 | 2194.181 | 2391.526 | 2540.588 |
| 3643  | MARCKS    | 1569.623 | -0.89256 | 0.156526 | -5.70233 | 1.18E-08 | 8.62E-08 | 1775.333 | 2577.762 | 1769.245 | 1024.546 | 1125.172 | 1145.677 |
| 2953  | RPS10     | 21597.29 | -0.89268 | 0.13764  | -6.48559 | 8.84E-11 | 7.96E-10 | 31726.15 | 21398.88 | 31097.11 | 15031.14 | 15050.78 | 15279.71 |
| 12001 | CUNH6orf  | 71.33344 | -0.89275 | 0.370989 | -2.40641 | 0.01611  | 0.035688 | 100.286  | 65.68942 | 109.9256 | 58.0353  | 59.8951  | 34.1693  |
| 3645  | ANKRD11   | 4622.518 | -0.89308 | 0.15666  | -5.70074 | 1.19E-08 | 8.70E-08 | 4992.615 | 7830.179 | 5206.854 | 3207.566 | 3091.015 | 3406.88  |
| 16338 | LOC119621 | 21.58535 | -0.89327 | 0.558975 | -1.59805 | 0.110031 | 0.179041 | 31.44101 | 27.918   | 24.3506  | 15.62489 | 17.11289 | 13.06473 |
| 6927  | LOC103211 | 452.9059 | -0.8933  | 0.237302 | -3.76442 | 0.000167 | 0.000641 | 461.3155 | 853.9624 | 451.5297 | 323.6584 | 297.3364 | 329.6333 |
| 10817 | LOC119621 | 77.69601 | -0.89331 | 0.335015 | -2.66647 | 0.007665 | 0.018839 | 112.2119 | 95.24966 | 92.53227 | 66.96381 | 62.03421 | 37.18424 |
| 2917  | DEK       | 6654.215 | -0.89351 | 0.136851 | -6.52905 | 6.62E-11 | 6.03E-10 | 7783.818 | 10756.09 | 7413.018 | 4622.735 | 4748.826 | 4600.796 |
| 1273  | RUSC2     | 4797.373 | -0.89374 | 0.090036 | -9.92646 | 3.19E-23 | 6.67E-22 | 6325.064 | 6278.814 | 6116.174 | 3345.958 | 3161.606 | 3556.622 |
| 3450  | RIOK1     | 1404.065 | -0.89396 | 0.151519 | -5.90001 | 3.63E-09 | 2.80E-08 | 1606.202 | 2270.117 | 1598.791 | 1017.85  | 979.7127 | 951.7156 |
| 6206  | LOC103241 | 167.1969 | -0.89408 | 0.219659 | -4.07029 | 4.70E-05 | 0.000201 | 231.4709 | 195.9734 | 225.417  | 122.767  | 106.9555 | 120.5975 |
| 2064  | METTL5    | 1273.067 | -0.89412 | 0.113754 | -7.86011 | 3.84E-15 | 4.94E-14 | 1561.209 | 1660.847 | 1738.633 | 930.797  | 919.8176 | 827.0981 |
| 23136 | HBM       | 2.457685 | -0.89481 | 1.660126 | -0.539   | 0.589885 | 0.677822 | 3.794605 | 2.189647 | 3.478657 | 0        | 4.278221 | 1.004979 |
| 3733  | IQCC      | 338.5942 | -0.89483 | 0.159501 | -5.61016 | 2.02E-08 | 1.44E-07 | 435.8374 | 449.4251 | 435.5278 | 249.9982 | 224.6066 | 236.1702 |
| 19299 | LOC119618 | 10.60832 | -0.89525 | 0.788355 | -1.13559 | 0.256127 | 0.352823 | 11.9259  | 12.04306 | 17.39328 | 6.696381 | 8.556443 | 7.034856 |
| 8848  | LOC119621 | 142.0035 | -0.89545 | 0.283608 | -3.15734 | 0.001592 | 0.004784 | 235.2655 | 148.3486 | 168.367  | 89.28508 | 128.3466 | 82.40832 |
| 1316  | RPS3      | 40460.88 | -0.89549 | 0.091342 | -9.80377 | 1.08E-22 | 2.19E-21 | 52341.15 | 48650.68 | 56893.43 | 29086.85 | 28608.47 | 27184.69 |
| 19668 | LOC103211 | 9.509306 | -0.8959  | 0.833246 | -1.0752  | 0.282287 | 0.381565 | 13.01007 | 9.853413 | 13.91463 | 6.696381 | 8.556443 | 5.024897 |
| 1780  | RTTN      | 1976.961 | -0.8959  | 0.105224 | -8.51422 | 1.68E-17 | 2.50E-16 | 2618.277 | 2479.776 | 2625.69  | 1339.276 | 1296.301 | 1502.444 |
| 22619 | LOC103231 | 3.48795  | -0.89647 | 1.441152 | -0.62205 | 0.53391  | 0.627525 | 5.96295  | 1.094824 | 6.261582 | 4.464254 | 2.139111 | 1.004979 |
| 2598  | TMCO6     | 1028.492 | -0.89664 | 0.128424 | -6.98187 | 2.91E-12 | 2.98E-11 | 1452.249 | 1237.151 | 1325.368 | 785.7087 | 643.8723 | 726.6002 |
| 4751  | BEGAIN    | 371.0821 | -0.89665 | 0.185098 | -4.84418 | 1.27E-06 | 7.11E-06 | 512.8137 | 410.5589 | 530.1473 | 223.2127 | 250.2759 | 299.4839 |
| 1415  | FAM126A   | 6614.678 | -0.89682 | 0.0946   | -9.48014 | 2.54E-21 | 4.77E-20 | 8384.45  | 9354.72  | 8085.094 | 4531.218 | 4549.888 | 4782.697 |
| 1852  | PSMC5     | 3380.092 | -0.89683 | 0.108114 | -8.29524 | 1.08E-16 | 1.56E-15 | 4303.624 | 4681.466 | 4218.219 | 2330.341 | 2156.932 | 2609.932 |
| 4054  | LSM4      | 2784.282 | -0.89684 | 0.16828  | -5.32943 | 9.85E-08 | 6.46E-07 | 4185.991 | 2591.448 | 4094.379 | 2004.45  | 1721.984 | 2107.442 |
| 1517  | WDR43     | 8716.024 | -0.89717 | 0.097559 | -9.19618 | 3.71E-20 | 6.50E-19 | 10896.48 | 12542.3  | 10590.42 | 5991.029 | 5993.788 | 6282.127 |
| 6570  | CIB2      | 189.1048 | -0.89726 | 0.229347 | -3.91223 | 9.14E-05 | 0.00037  | 262.3698 | 230.4604 | 243.506  | 171.8738 | 104.8164 | 121.6025 |
| 2093  | HNRNPA1   | 40312.95 | -0.89746 | 0.114991 | -7.80459 | 5.97E-15 | 7.58E-14 | 48659.3  | 61607.37 | 47123.97 | 27785.52 | 27158.15 | 29543.38 |
| 1964  | TSEN2     | 1260.569 | -0.89748 | 0.111338 | -8.06087 | 7.58E-16 | 1.03E-14 | 1634.932 | 1706.283 | 1577.919 | 839.2797 | 949.7651 | 855.2375 |
| 23278 | LOC119621 | 2.07875  | -0.89763 | 1.736293 | -0.51698 | 0.605171 | 0.691171 | 2.710432 | 2.737059 | 2.782925 | 2.232127 | 0        | 2.009959 |
| 1883  | GPT2      | 4069.602 | -0.89805 | 0.109156 | -8.22724 | 1.92E-16 | 2.70E-15 | 5570.48  | 5013.745 | 5317.475 | 2705.338 | 2609.715 | 3200.86  |
| 1667  | B3GALNT2  | 3480.949 | -0.89822 | 0.102014 | -8.80491 | 1.31E-18 | 2.09E-17 | 4530.758 | 4894.409 | 4172.301 | 2363.822 | 2363.717 | 2560.688 |
| 16378 | CLEC18C   | 23.62595 | -0.8983  | 0.564338 | -1.59178 | 0.111434 | 0.180877 | 29.81475 | 25.18094 | 36.17803 | 24.5534  | 14.97377 | 11.05477 |
| 12608 | SOX2      | 54.88471 | -0.89852 | 0.393944 | -2.28082 | 0.022559 | 0.047567 | 56.37698 | 90.87036 | 65.39875 | 46.87467 | 40.6431  | 29.1444  |
| 17292 | LOC103211 | 21.9436  | -0.89872 | 0.6198   | -1.45002 | 0.147052 | 0.226079 | 33.60935 | 21.34906 | 29.91645 | 8.928508 | 27.80844 | 10.04979 |
| 14148 | LOC103211 | 37.41128 | -0.89879 | 0.452595 | -1.98585 | 0.04705  | 0.088409 | 59.08741 | 34.48694 | 52.17985 | 26.78552 | 27.80844 | 24.11951 |
| 2217  | LOC103241 | 6501.639 | -0.90013 | 0.118938 | -7.56804 | 3.79E-14 | 4.54E-13 | 9015.98  | 7068.181 | 9314.452 | 4767.823 | 4387.316 | 4456.079 |
| 4139  | DISC1     | 277.8617 | -0.90037 | 0.171003 | -5.26522 | 1.40E-07 | 8.99E-07 | 355.6087 | 363.4814 | 365.9547 | 198.6593 | 192.52   | 190.9461 |
| 1940  | CEP55     | 2621.922 | -0.90042 | 0.110935 | -8.11662 | 4.79E-16 | 6.57E-15 | 3198.852 | 3849.947 | 3192.711 | 1866.058 | 1831.079 | 1792.883 |
| 1567  | MTA1      | 3973.978 | -0.90057 | 0.099461 | -9.05456 | 1.37E-19 | 2.33E-18 | 5053.329 | 5240.373 | 5239.553 | 2866.051 | 2489.925 | 2954.64  |
| 8894  | MACROD2   | 87.90511 | -0.9016  | 0.286565 | -3.14624 | 0.001654 | 0.004943 | 111.6698 | 114.9565 | 115.4914 | 64.73168 | 66.31243 | 54.26889 |
| 10458 | LOC103211 | 118.2821 | -0.90177 | 0.327398 | -2.75434 | 0.005881 | 0.01495  | 191.8986 | 93.06001 | 176.02   | 98.21359 | 79.14709 | 71.35354 |
| 1911  | RBMS1     | 8296.581 | -0.90186 | 0.110309 | -8.17575 | 2.94E-16 | 4.09E-15 | 10311.02 | 12355.63 | 9762.503 | 5745.495 | 5531.74  | 6073.091 |
| 24341 | LOC119621 | 0.967098 | -0.9021  | 2.5378   | -0.35547 | 0.722239 | 0.788758 | 1.084173 | 1.094824 | 1.391463 | 2.232127 | 0        | 0        |
| 21942 | LOC119621 | 5.109769 | -0.90249 | 1.224033 | -0.73731 | 0.460933 | 0.558491 | 5.96295  | 1.642235 | 12.52316 | 2.232127 | 4.278221 | 4.019918 |
| 2354  | CTIF      | 1188.073 | -0.90254 | 0.123054 | -7.33452 | 2.23E-13 | 2.51E-12 | 1585.061 | 1505.93  | 1559.134 | 859.3689 | 714.463  | 904.4815 |
| 2341  | THOC6     | 1696.654 | -0.90256 | 0.122765 | -7.35193 | 1.95E-13 | 2.22E-12 | 2450.772 | 1923.605 | 2261.127 | 1133.921 | 1174.372 | 1236.125 |
| 13677 | LOC103231 | 44.00706 | -0.90257 | 0.435356 | -2.07318 | 0.038155 | 0.074165 | 62.33993 | 53.09895 | 57.04997 | 42.41041 | 14.97377 | 34.1693  |
| 23824 | TRNAG-UC  | 1.627015 | -0.90274 | 2.079883 | -0.43404 | 0.664263 | 0.741245 | 1.626259 | 1.642235 | 3.478657 | 0        | 0        | 3.014938 |
| 1486  | KIAA0100  | 24589.71 | -0.90279 | 0.097168 | -9.29104 | 1.53E-20 | 2.73E-19 | 31964.12 | 33477.52 | 30695.67 | 16283.37 | 16122.48 | 18995.12 |
| 2228  | EIF2S2    | 11712.13 | -0.90292 | 0.119479 | -7.55711 | 4.12E-14 | 4.92E-13 | 13822.12 | 18158.2  | 13803.31 | 8249.941 | 8301.888 | 7937.328 |
| 2015  | ARAP3     | 1769.743 | -0.90335 | 0.113714 | -7.94401 | 1.96E-15 | 2.58E-14 | 2377.591 | 2260.263 | 2291.043 | 1113.831 | 1197.902 | 1377.827 |
| 14813 | LOC103231 | 53.02049 | -0.90336 | 0.48302  | -1.87024 | 0.061451 | 0.110286 | 99.20181 | 30.10765 | 78.61764 | 40.17829 | 27.80844 | 42.20914 |
| 2946  | NLN       | 4893.516 | -0.9034  | 0.13915  | -6.4923  | 8.45E-11 | 7.63E-10 | 5696.786 | 7945.682 | 5490.016 | 3310.244 | 3480.333 | 3438.035 |
| 19463 | LOC119618 | 9.663494 | -0.90345 | 0.815823 | -1.10741 | 0.268117 | 0.366228 | 12.46799 | 14.23271 | 11.1317  | 6.696381 | 6.417332 | 7.034856 |
| 5236  | AMT       | 276.8542 | -0.90376 | 0.198143 | -4.56117 | 5.09E-06 | 2.58E-05 | 414.154  | 304.361  | 365.259  | 205.3557 | 168.9897 | 203.0059 |
| 23071 | LOC119621 | 2.601555 | -0.90398 | 1.641448 | -0.55072 | 0.581824 | 0.670414 | 3.794605 | 1.094824 | 5.565851 | 0        | 2.139111 | 3.014938 |
| 1544  | FOXK2     | 3948.301 | -0.90402 | 0.099284 | -9.10542 | 8.59E-20 | 1.48E-18 | 5016.467 | 5609.876 | 4815.853 | 2747.748 | 2656.775 | 2843.087 |
| 1284  | NUP107    | 3865.735 | -0.90408 | 0.091334 | -9.89861 | 4.22E-23 | 8.74E-22 | 5097.238 | 5155.524 | 4870.12  | 2555.785 | 2686.723 | 2829.017 |
| 13061 | SEZ6L2    | 46.27988 | -0.90428 | 0.412043 | -2.19463 | 0.02819  | 0.05738  | 59.6295  | 52.00412 | 67.48594 | 37.94616 | 38.50399 | 22.10955 |
| 1828  | CENPA     | 2168.873 | -0.90456 | 0.108083 | -8.36912 | 5.80E-17 | 8.44E-16 | 2765.725 | 3011.86  | 2        |          |          |          |



|       |           |          |          |          |          |          |          |          |          |          |          |          |          |
|-------|-----------|----------|----------|----------|----------|----------|----------|----------|----------|----------|----------|----------|----------|
| 3552  | MPP7      | 419.8399 | -0.90524 | 0.156    | -5.80283 | 6.52E-09 | 4.88E-08 | 504.6824 | 595.5841 | 540.5833 | 283.4801 | 312.3102 | 282.3992 |
| 18067 | HESX1     | 18.08023 | -0.90546 | 0.680593 | -1.33041 | 0.183385 | 0.269845 | 28.18849 | 14.78012 | 28.52499 | 15.62489 | 4.278221 | 17.08465 |
| 4589  | LOC119625 | 252.0507 | -0.90614 | 0.183108 | -4.94869 | 7.47E-07 | 4.33E-06 | 314.9522 | 348.7013 | 322.8194 | 160.7131 | 188.2417 | 176.8764 |
| 21266 | TRNAK-CU  | 7.197052 | -0.90622 | 1.078763 | -0.84005 | 0.400878 | 0.501144 | 8.131296 | 2.189647 | 18.08902 | 4.464254 | 4.278221 | 6.029877 |
| 3609  | LOC103226 | 339.6745 | -0.90637 | 0.158159 | -5.73072 | 1.00E-08 | 7.37E-08 | 442.3425 | 445.5932 | 440.398  | 245.534  | 231.024  | 233.1552 |
| 7907  | LOC103226 | 116.6816 | -0.9068  | 0.26392  | -3.43588 | 0.000591 | 0.001986 | 156.663  | 142.8745 | 156.5396 | 100.4457 | 64.17332 | 79.39338 |
| 21140 | LOC119625 | 6.538707 | -0.90683 | 1.054915 | -0.85963 | 0.389995 | 0.490456 | 7.589209 | 3.831883 | 13.91463 | 4.464254 | 6.417332 | 3.014938 |
| 1504  | RPL35     | 31387.02 | -0.90689 | 0.098128 | -9.24189 | 2.42E-20 | 4.28E-19 | 40460.78 | 37931.26 | 44418.97 | 23261    | 22000.75 | 20249.33 |
| 1430  | KNTC1     | 5495.51  | -0.90694 | 0.096104 | -9.43704 | 3.83E-21 | 7.13E-20 | 7252.031 | 7418.525 | 6843.214 | 3705.331 | 3604.401 | 4149.56  |
| 1176  | CDH17     | 6424.377 | -0.90716 | 0.08857  | -10.2423 | 1.28E-24 | 2.90E-23 | 8437.032 | 8753.115 | 7954.992 | 4453.093 | 4306.03  | 4642     |
| 20384 | LOC119618 | 8.052999 | -0.90742 | 0.941347 | -0.96396 | 0.335066 | 0.436996 | 5.420864 | 15.32753 | 10.43597 | 6.696381 | 6.417332 | 4.019918 |
| 3396  | RPIA      | 467.9383 | -0.90796 | 0.152641 | -5.94832 | 2.71E-09 | 2.12E-08 | 646.167  | 642.6615 | 544.0619 | 325.8905 | 310.171  | 338.6781 |
| 2051  | OTUD6B    | 2636.261 | -0.90805 | 0.115248 | -7.87909 | 3.30E-15 | 4.27E-14 | 3195.057 | 3940.27  | 3182.971 | 1814.719 | 1852.47  | 1832.078 |
| 9287  | TENT5B    | 80.75681 | -0.90815 | 0.299278 | -3.03449 | 0.002409 | 0.006896 | 104.6227 | 102.366  | 109.9256 | 60.26743 | 47.06043 | 60.29877 |
| 2376  | LOC119624 | 739.8053 | -0.90821 | 0.124318 | -7.30554 | 2.76E-13 | 3.09E-12 | 910.7051 | 1003.953 | 980.2855 | 511.1571 | 526.2212 | 506.5097 |
| 2099  | PNO1      | 2800.851 | -0.90845 | 0.116536 | -7.79541 | 6.42E-15 | 8.13E-14 | 3853.15  | 3129.006 | 3980.975 | 1979.897 | 1946.591 | 1915.491 |
| 1162  | POLDIP2   | 4071.461 | -0.90862 | 0.088308 | -10.2891 | 7.89E-25 | 1.81E-23 | 5250.106 | 5477.403 | 5216.594 | 2778.998 | 2753.035 | 2952.63  |
| 2192  | PDE5A     | 1167.946 | -0.9087  | 0.119202 | -7.62322 | 2.47E-14 | 3.00E-13 | 1464.175 | 1678.912 | 1431.119 | 810.2621 | 785.0536 | 838.1529 |
| 12777 | LOC119626 | 62.41369 | -0.9088  | 0.405066 | -2.24358 | 0.024859 | 0.051725 | 110.5856 | 60.2153  | 73.74753 | 58.0353  | 25.66933 | 46.22906 |
| 2202  | SUZ12     | 4970.436 | -0.90887 | 0.119616 | -7.59825 | 3.00E-14 | 3.62E-13 | 6091.425 | 7559.21  | 5812.14  | 3252.209 | 3452.525 | 3655.11  |
| 3034  | LOC103245 | 1695.599 | -0.90895 | 0.142863 | -6.36239 | 1.99E-10 | 1.74E-09 | 2070.228 | 2553.129 | 2021.795 | 1180.795 | 998.9647 | 1348.682 |
| 2664  | SLITRK5   | 1101.921 | -0.90962 | 0.132254 | -6.87787 | 6.08E-12 | 6.06E-11 | 1296.129 | 1626.361 | 1388.68  | 830.3512 | 744.4105 | 725.5952 |
| 29020 | LOC103245 | 0.712246 | -0.90978 | 3.128069 | -0.29084 | 0.771171 | NA       | 1.626259 | 1.642235 | 0        | 0        | 0        | 1.004979 |
| 6067  | LOC119615 | 191.9913 | -0.90979 | 0.219824 | -4.13871 | 3.49E-05 | 0.000153 | 241.7705 | 240.3138 | 274.1182 | 118.3027 | 117.6511 | 159.7917 |
| 1522  | ZBTB80S   | 1539.898 | -0.9099  | 0.099191 | -9.17318 | 4.59E-20 | 8.02E-19 | 2046.376 | 2000.79  | 1982.139 | 1084.814 | 1060.999 | 1064.273 |
| 21779 | LOC119620 | 5.03528  | -0.91016 | 1.193069 | -0.76288 | 0.445537 | 0.543854 | 3.252518 | 4.379295 | 11.82743 | 4.464254 | 4.278221 | 2.009959 |
| 6982  | UNC5B     | 126.1459 | -0.91064 | 0.243432 | -3.74083 | 0.000183 | 0.000698 | 159.3734 | 173.5295 | 160.0182 | 95.98146 | 85.56443 | 82.40832 |
| 3085  | PDE9A     | 638.4399 | -0.9109  | 0.144694 | -6.29536 | 3.07E-10 | 2.64E-09 | 786.0252 | 944.2854 | 768.0874 | 468.7467 | 436.3786 | 427.1163 |
| 17418 | LOC119618 | 21.1408  | -0.91106 | 0.638665 | -1.4265  | 0.153724 | 0.234629 | 21.14137 | 38.31883 | 22.95914 | 6.696381 | 25.66933 | 12.05975 |
| 8205  | LOC103245 | 99.93747 | -0.9113  | 0.27247  | -3.3446  | 0.000824 | 0.00267  | 140.4004 | 123.7151 | 128.0146 | 60.26743 | 74.86887 | 72.35852 |
| 1712  | EML1      | 2820.945 | -0.91139 | 0.104817 | -8.6951  | 3.47E-18 | 5.38E-17 | 3628.726 | 3893.193 | 3536.403 | 1941.95  | 1796.853 | 2128.547 |
| 12369 | LOC103235 | 74.0368  | -0.9118  | 0.391609 | -2.32834 | 0.019894 | 0.042759 | 112.2119 | 68.42648 | 111.317  | 60.26743 | 25.66933 | 66.32864 |
| 6890  | LOC103235 | 243.5983 | -0.91181 | 0.241198 | -3.78033 | 0.000157 | 0.000604 | 342.5986 | 223.344  | 388.2181 | 189.7308 | 151.8769 | 165.8216 |
| 3081  | LOC119625 | 1671.27  | -0.9121  | 0.144721 | -6.30246 | 2.93E-10 | 2.53E-09 | 2042.581 | 2529.59  | 1982.834 | 1154.01  | 983.9909 | 1334.613 |
| 9425  | LOC103216 | 108.9175 | -0.91232 | 0.303906 | -3.00197 | 0.002682 | 0.007566 | 119.259  | 159.8442 | 146.7993 | 104.91   | 51.33866 | 71.35354 |
| 11895 | LOC119626 | 62.71723 | -0.91234 | 0.37606  | -2.42604 | 0.015265 | 0.034114 | 107.3331 | 56.93083 | 81.40057 | 44.64254 | 42.78221 | 43.21412 |
| 6459  | ARSG      | 158.122  | -0.91273 | 0.230654 | -3.95713 | 7.59E-05 | 0.000312 | 191.8986 | 232.1026 | 194.8048 | 124.9991 | 98.39909 | 106.5278 |
| 21359 | LOC119618 | 6.159698 | -0.91301 | 1.109514 | -0.8229  | 0.410567 | 0.511023 | 11.38381 | 5.474118 | 7.653045 | 0        | 6.417332 | 6.029877 |
| 10967 | LOC103245 | 15179.26 | -0.91309 | 0.346387 | -2.63605 | 0.008388 | 0.020332 | 23853.43 | 10418.34 | 25214.7  | 10624.92 | 9925.473 | 11038.69 |
| 7773  | LOC103215 | 111.3316 | -0.91317 | 0.263065 | -3.47126 | 0.000518 | 0.001771 | 127.9324 | 160.3917 | 148.1908 | 80.35657 | 72.72976 | 78.3884  |
| 1231  | TBC1D14   | 4113.2   | -0.91381 | 0.090835 | -10.0601 | 8.29E-24 | 1.79E-22 | 5562.89  | 5307.158 | 5259.033 | 2778.998 | 2755.175 | 3015.943 |
| 3168  | CEP72     | 1165.627 | -0.91413 | 0.147475 | -6.19859 | 5.70E-10 | 4.78E-09 | 1743.35  | 1269.448 | 1561.917 | 765.6196 | 752.967  | 900.4616 |
| 19999 | LOC119620 | 9.247416 | -0.91416 | 0.887477 | -1.03007 | 0.302979 | 0.402756 | 10.29964 | 9.853413 | 16.00182 | 11.16063 | 2.139111 | 6.029877 |
| 6043  | EPHB6     | 165.3146 | -0.91444 | 0.22053  | -4.14653 | 3.38E-05 | 0.000149 | 226.05   | 201.995  | 218.4597 | 109.3742 | 130.4858 | 105.5228 |
| 3837  | LOC103225 | 395.4021 | -0.91449 | 0.166042 | -5.50762 | 3.64E-08 | 2.52E-07 | 559.4331 | 489.3862 | 506.4924 | 249.9982 | 254.5542 | 312.5486 |
| 17262 | LOC119615 | 17.9281  | -0.9146  | 0.627864 | -1.45668 | 0.145204 | 0.223614 | 21.68345 | 17.51718 | 31.30791 | 11.16063 | 12.83466 | 13.06473 |
| 2532  | NCK2      | 898.9991 | -0.9147  | 0.129197 | -7.07989 | 1.44E-12 | 1.51E-11 | 1147.055 | 1293.534 | 1086.732 | 578.1209 | 635.3159 | 653.2367 |
| 20707 | CUZD1     | 6.521643 | -0.91523 | 0.99584  | -0.91906 | 0.358066 | 0.459709 | 8.673382 | 8.211177 | 8.348776 | 4.464254 | 6.417332 | 3.014938 |
| 2708  | AP1AR     | 727.2828 | -0.91524 | 0.134072 | -6.82643 | 8.71E-12 | 8.55E-11 | 952.9878 | 1015.449 | 878.013  | 522.3177 | 532.6386 | 462.2906 |
| 7604  | LOC103235 | 246.1167 | -0.91538 | 0.259723 | -3.52447 | 0.000424 | 0.001484 | 250.986  | 454.8992 | 257.4206 | 187.4987 | 171.1289 | 154.7688 |
| 11300 | LOC103245 | 75.18107 | -0.91619 | 0.358019 | -2.55905 | 0.010496 | 0.024693 | 87.27591 | 117.6935 | 89.74935 | 31.24978 | 74.86887 | 50.24897 |
| 3481  | HYI       | 620.2605 | -0.91633 | 0.155923 | -5.87678 | 4.18E-09 | 3.19E-08 | 841.8601 | 765.8291 | 832.0947 | 426.3363 | 352.9533 | 502.4897 |
| 1272  | PCGF5     | 2914.147 | -0.91641 | 0.092318 | -9.92674 | 3.18E-23 | 6.66E-22 | 3845.561 | 3937.533 | 3649.111 | 2017.843 | 1961.564 | 2073.273 |
| 4404  | PABIR3    | 312.9422 | -0.9165  | 0.18049  | -5.07788 | 3.82E-07 | 2.30E-06 | 380.5446 | 437.382  | 411.1772 | 178.5702 | 243.8586 | 226.1204 |
| 8117  | LOC103235 | 142.9427 | -0.91688 | 0.271785 | -3.37356 | 0.000742 | 0.00243  | 151.2421 | 240.3138 | 170.4542 | 102.6778 | 83.42532 | 109.5428 |
| 6122  | CDK3      | 192.383  | -0.91717 | 0.223261 | -4.10806 | 3.99E-05 | 0.000173 | 278.0903 | 210.7535 | 267.8566 | 113.8385 | 139.0422 | 144.717  |
| 2606  | LOC103245 | 858.8838 | -0.9173  | 0.131587 | -6.97105 | 3.15E-12 | 3.21E-11 | 1197.469 | 1068.548 | 1102.734 | 531.2462 | 667.4025 | 585.903  |
| 1788  | INTS3     | 4114.919 | -0.91787 | 0.108137 | -8.48805 | 2.10E-17 | 3.12E-16 | 5629.567 | 5229.425 | 5297.299 | 2638.374 | 2673.888 | 3220.959 |
| 14088 | LOC119625 | 40.52302 | -0.91863 | 0.460025 | -1.99691 | 0.045835 | 0.086495 | 63.96619 | 38.31883 | 54.96278 | 35.71403 | 32.08666 | 18.08963 |
| 20575 | LOC119624 | 14.53718 | -0.91909 | 0.976097 | -0.9416  | 0.346399 | 0.447583 | 11.9259  | 16.42235 | 27.82925 | 2.232127 | 27.80844 | 1.004979 |
| 20742 | LOC103225 | 8.066652 | -0.91919 | 1.008728 | -0.91123 | 0.362172 | 0.464195 | 13.01007 | 3.831883 | 14.61036 | 2.232127 | 10.69555 | 4.019918 |
| 13945 | XRRRA1    | 37.2253  | -0.9192  | 0.454206 | -2.02376 | 0.042995 | 0.081966 | 49.87195 | 54.19377 | 43.13534 | 29.01765 | 14.97377 | 32.15934 |
| 2964  | HROB      | 658.3236 | -0.91924 | 0.142057 | -6.47093 | 9.74E-11 | 8.74E-10 | 864.0857 | 907.6088 | 818.8758 | 410.7114 | 432.1004 | 516.5594 |
| 1279  | BARO1     | 2135.732 | -0.91952 | 0.092803 | -9.90838 | 3.83E-23 | 7.96E-22 | 2784.698 | 2810.96  | 2788.491 | 1491.061 | 1441.761 | 1497.419 |
| 4500  | LOC103245 | 724.6234 | -0.9196  | 0.183537 | -5.01043 | 5.43E-07 | 3.21E-06 | 753.5001 | 1178.578 | 907.2337 | 535.7105 | 547.6123 | 425.1063 |
| 20480 | LOC119620 | 7.193311 | -0.91989 | 0.968141 | -0.95016 | 0.34203  | 0.443988 | 12.46799 | 7.663765 | 8.348776 | 2.232127 | 6.417332 | 6.029877 |
| 2683  | MED28     | 681.0005 | -0.92004 | 0.134197 | -6.85593 | 7.08E-12 | 7.02E-11 | 953.5299 | 906.514  | 812.6142 | 450.8897 | 494.1346 | 468.3204 |
| 2321  | GPAT3     | 833.7193 | -0.92022 | 0.124654 | -7.38223 | 1.56E-13 | 1.78E-12 | 1097.725 | 1113.436 | 1065.165 | 600.4422 | 515.5257 | 610.0225 |
| 2928  | PIGL      | 514.7702 | -0.92068 | 0.141376 | -6.5123  | 7.40E-11 | 6.72E-10 | 691.7022 | 689.7389 | 642.8558 | 330.3548 | 355.0924 | 378.8773 |
| 17173 | LOC103245 | 18.20136 | -0.92146 | 0.62615  | -1.47163 | 0.141121 | 0.218452 | 26.02015 | 20.80165 | 23.65487 | 17.85702 | 12.83466 | 8.039836 |
| 1228  | FANCD2    | 6416.365 | -0.9216  | 0.091499 | -10.0722 | 7.33E-24 |          |          |          |          |          |          |          |



|       |           |          |          |          |          |          |          |          |          |          |          |          |          |
|-------|-----------|----------|----------|----------|----------|----------|----------|----------|----------|----------|----------|----------|----------|
| 4841  | CUNH20or  | 994.0307 | -0.92194 | 0.192542 | -4.78826 | 1.68E-06 | 9.24E-06 | 1559.582 | 904.3243 | 1443.643 | 678.5666 | 603.2292 | 774.8392 |
| 9344  | ESAM      | 78.97136 | -0.92222 | 0.305367 | -3.02004 | 0.002527 | 0.007191 | 94.32303 | 100.1764 | 116.1871 | 49.10679 | 57.75599 | 56.27885 |
| 2502  | ENAH      | 5959.831 | -0.92229 | 0.129349 | -7.13021 | 1.00E-12 | 1.06E-11 | 7068.264 | 9447.781 | 6894.002 | 4087.025 | 3944.52  | 4317.392 |
| 13937 | PHF24     | 46.02594 | -0.92303 | 0.455758 | -2.02525 | 0.042841 | 0.08172  | 53.12446 | 76.63765 | 49.39693 | 24.5534  | 51.33866 | 21.10457 |
| 10558 | LOC11961f | 75.70637 | -0.92345 | 0.338064 | -2.7316  | 0.006303 | 0.015871 | 85.10756 | 129.7366 | 82.0963  | 53.57105 | 53.47777 | 50.24897 |
| 3225  | LOC10322f | 521.6596 | -0.9236  | 0.150509 | -6.13649 | 8.44E-10 | 6.95E-09 | 665.6821 | 766.3765 | 616.418  | 372.7652 | 352.9533 | 355.7627 |
| 22208 | LOC11961f | 4.006458 | -0.92384 | 1.337002 | -0.69098 | 0.489579 | 0.586071 | 5.96295  | 5.474118 | 4.174388 | 0        | 6.417332 | 2.009959 |
| 18943 | LOC10322f | 15.42415 | -0.92417 | 0.772584 | -1.19621 | 0.231614 | 0.325052 | 24.39389 | 9.306001 | 26.43779 | 20.08914 | 4.278221 | 8.039836 |
| 10255 | LOC10323f | 69.51095 | -0.92428 | 0.330046 | -2.80045 | 0.005103 | 0.013229 | 104.6227 | 76.63765 | 91.14081 | 49.10679 | 51.33866 | 44.2191  |
| 17191 | LOC11962f | 17.29968 | -0.9252  | 0.629807 | -1.46903 | 0.141826 | 0.219327 | 23.8518  | 26.27577 | 17.39328 | 13.39276 | 12.83466 | 10.04979 |
| 23666 | LOC11961f | 1.531697 | -0.9255  | 2.013257 | -0.4597  | 0.64573  | 0.725375 | 2.168345 | 1.094824 | 2.782925 | 0        | 2.139111 | 1.004979 |
| 2004  | MYC       | 6947.566 | -0.92576 | 0.116222 | -7.96541 | 1.65E-15 | 2.18E-14 | 8176.289 | 10620.34 | 8515.752 | 4774.52  | 4609.783 | 4988.718 |
| 1698  | RNF213    | 31562.96 | -0.92577 | 0.106007 | -8.73307 | 2.48E-18 | 3.88E-17 | 39652.53 | 44217.19 | 40210.49 | 20923.96 | 19769.66 | 24603.91 |
| 5447  | PDIK1L    | 178.4747 | -0.92589 | 0.208474 | -4.4413  | 8.94E-06 | 4.36E-05 | 249.3597 | 226.6285 | 225.417  | 122.767  | 124.0684 | 122.6075 |
| 3409  | PODXL2    | 660.2724 | -0.92624 | 0.156013 | -5.93697 | 2.90E-09 | 2.26E-08 | 937.2673 | 743.9327 | 919.0611 | 464.2824 | 393.5964 | 503.4947 |
| 23641 | LOC11961f | 1.532585 | -0.92664 | 2.001812 | -0.4629  | 0.643437 | 0.723563 | 1.626259 | 1.642235 | 2.782925 | 0        | 2.139111 | 1.004979 |
| 2986  | FAU       | 11776.5  | -0.92668 | 0.143844 | -6.44225 | 1.18E-10 | 1.05E-09 | 17402.06 | 11567.36 | 17333.45 | 8252.173 | 7792.78  | 8311.18  |
| 1491  | CDK1      | 4098.434 | -0.9268  | 0.100014 | -9.26668 | 1.92E-20 | 3.42E-19 | 5718.469 | 4879.629 | 5512.28  | 2850.426 | 2911.33  | 2718.469 |
| 8766  | FMN2      | 92.49068 | -0.92697 | 0.291277 | -3.18242 | 0.001461 | 0.004429 | 109.5014 | 139.59   | 115.4914 | 53.57105 | 68.45154 | 68.3386  |
| 12047 | GRTP1     | 54.84683 | -0.92704 | 0.386636 | -2.39771 | 0.016498 | 0.036407 | 76.97626 | 60.76271 | 75.83472 | 40.17829 | 49.19955 | 26.12947 |
| 1624  | ADAM17    | 7489.433 | -0.92717 | 0.104015 | -8.91386 | 4.93E-19 | 8.07E-18 | 9327.138 | 11017.76 | 9107.819 | 5191.927 | 4926.372 | 5365.585 |
| 14807 | LOC11962f | 31.89674 | -0.92717 | 0.495441 | -1.87141 | 0.061288 | 0.110038 | 48.78777 | 43.24553 | 32.00364 | 22.32127 | 29.94755 | 15.07469 |
| 3359  | YBX1      | 34329.38 | -0.92757 | 0.1551   | -5.98044 | 2.23E-09 | 1.76E-08 | 37511.83 | 59477.39 | 38011.28 | 23641.89 | 23643.59 | 23870.27 |
| 1655  | EFTUD2    | 14411.55 | -0.92777 | 0.105031 | -8.83327 | 1.02E-18 | 1.63E-17 | 19445.72 | 18941    | 18301.91 | 9640.556 | 8894.422 | 11245.72 |
| 5827  | PLCG2     | 195.7357 | -0.92792 | 0.217797 | -4.26047 | 2.04E-05 | 9.31E-05 | 224.4238 | 285.2016 | 257.4206 | 154.0168 | 134.764  | 118.5876 |
| 4074  | LOC10324f | 307.058  | -0.92809 | 0.174567 | -5.31656 | 1.06E-07 | 6.90E-07 | 390.3022 | 424.2442 | 396.5669 | 183.0344 | 216.0502 | 232.1503 |
| 5952  | MTURN     | 246.3014 | -0.92826 | 0.221808 | -4.18495 | 2.85E-05 | 0.000127 | 308.4471 | 391.3994 | 267.8566 | 145.0883 | 203.2155 | 161.8017 |
| 4320  | LOC10322f | 310.2294 | -0.92863 | 0.180605 | -5.14175 | 2.72E-07 | 1.68E-06 | 393.5547 | 443.4036 | 387.5224 | 207.5878 | 186.1026 | 243.205  |
| 10065 | LOC11962f | 65.88365 | -0.92869 | 0.326132 | -2.84759 | 0.004405 | 0.011635 | 83.4813  | 88.68071 | 87.66215 | 40.17829 | 47.06043 | 48.23901 |
| 21371 | LOC11962f | 5.038498 | -0.9288  | 1.13091  | -0.82128 | 0.411485 | 0.511877 | 7.047123 | 5.474118 | 6.957314 | 4.464254 | 4.278221 | 2.009959 |
| 3144  | ITPA      | 1208.772 | -0.92916 | 0.149265 | -6.22487 | 4.82E-10 | 4.08E-09 | 1834.42  | 1313.788 | 1612.705 | 783.4766 | 778.6363 | 929.606  |
| 10495 | LOC10322f | 86.63839 | -0.92923 | 0.338484 | -2.74526 | 0.006046 | 0.015316 | 133.8953 | 89.22813 | 115.4914 | 53.57105 | 83.42532 | 44.2191  |
| 1787  | SMIM13    | 1550.741 | -0.92923 | 0.109445 | -8.4904  | 2.06E-17 | 3.06E-16 | 2013.309 | 2191.289 | 1893.085 | 1091.51  | 1078.112 | 1037.139 |
| 1187  | ATP10D    | 13847.05 | -0.92964 | 0.091181 | -10.1955 | 2.08E-24 | 4.65E-23 | 17824.34 | 19672.89 | 16986.28 | 9517.789 | 9279.462 | 9801.565 |
| 3222  | CENPW     | 723.6138 | -0.9302  | 0.151524 | -6.13898 | 8.31E-10 | 6.85E-09 | 979.008  | 803.0531 | 1061.686 | 535.7105 | 506.9692 | 455.2557 |
| 2631  | FAM76A    | 605.6652 | -0.93025 | 0.134267 | -6.92841 | 4.26E-12 | 4.30E-11 | 851.0756 | 760.9024 | 770.1746 | 410.7114 | 432.1004 | 409.0266 |
| 2040  | ATP5ME    | 2322.294 | -0.93028 | 0.117835 | -7.89474 | 2.91E-15 | 3.79E-14 | 2754.883 | 3391.216 | 2990.253 | 1502.221 | 1745.514 | 1549.678 |
| 9818  | SLC7A2    | 88.64017 | -0.93039 | 0.320759 | -2.9006  | 0.003725 | 0.010085 | 118.7169 | 123.7151 | 104.3597 | 49.10679 | 87.70354 | 48.23901 |
| 2493  | BRIP1     | 2431.558 | -0.93056 | 0.13029  | -7.1422  | 9.18E-13 | 9.79E-12 | 2922.93  | 3812.723 | 2832.322 | 1654.006 | 1709.149 | 1658.216 |
| 18415 | LOC11961f | 17.90974 | -0.93065 | 0.73739  | -1.26208 | 0.20692  | 0.298706 | 35.7777  | 9.853413 | 25.04633 | 4.464254 | 19.252   | 13.06473 |
| 10942 | GPR3      | 55.93583 | -0.9307  | 0.352427 | -2.64084 | 0.00827  | 0.020093 | 72.63957 | 70.06871 | 77.22618 | 35.71403 | 42.78221 | 37.18424 |
| 1374  | ICE2      | 2872.955 | -0.93077 | 0.096524 | -9.64285 | 5.27E-22 | 1.02E-20 | 3718.712 | 4011.981 | 3576.755 | 1912.933 | 2021.46  | 1995.889 |
| 22531 | HTR6      | 4.975472 | -0.93129 | 1.4645   | -0.63591 | 0.524835 | 0.619269 | 3.794605 | 4.926706 | 10.43597 | 0        | 10.69555 | 0        |
| 3459  | ALKBH2    | 428.8416 | -0.93142 | 0.15798  | -5.89581 | 3.73E-09 | 2.87E-08 | 540.4601 | 610.3642 | 541.279  | 287.9444 | 267.3888 | 325.6133 |
| 1495  | ADD1      | 5553.858 | -0.93144 | 0.10059  | -9.25977 | 2.05E-20 | 3.64E-19 | 7170.718 | 7673.071 | 7025.495 | 3834.794 | 3467.498 | 4151.57  |
| 3739  | GLIS2     | 447.1221 | -0.93179 | 0.166244 | -5.60496 | 2.08E-08 | 1.48E-07 | 510.6454 | 596.1315 | 657.4661 | 283.4801 | 297.3364 | 337.6731 |
| 23720 | LOC10323f | 1.642315 | -0.93218 | 2.068076 | -0.45075 | 0.652172 | 0.730935 | 2.710432 | 2.737059 | 1.391463 | 0        | 0        | 3.014938 |
| 23721 | LOC11962f | 1.642315 | -0.93218 | 2.068076 | -0.45075 | 0.652172 | 0.730935 | 2.710432 | 2.737059 | 1.391463 | 0        | 0        | 3.014938 |
| 15830 | MAN1A1    | 24.97855 | -0.93224 | 0.550395 | -1.69377 | 0.090309 | 0.151666 | 28.73058 | 31.20247 | 38.96096 | 22.32127 | 8.556443 | 20.09959 |
| 4671  | ZSCAN10   | 219.0182 | -0.93287 | 0.190226 | -4.90403 | 9.39E-07 | 5.34E-06 | 287.8479 | 278.0852 | 297.0773 | 154.0168 | 143.3204 | 153.7619 |
| 1807  | CSTF3     | 3234.253 | -0.93327 | 0.11067  | -8.43284 | 3.37E-17 | 4.96E-16 | 4035.833 | 4778.358 | 3926.012 | 2169.627 | 2154.084 | 2341.602 |
| 10273 | LOC10323f | 72.42782 | -0.93335 | 0.333928 | -2.79506 | 0.005189 | 0.013428 | 104.6227 | 77.73248 | 101.5768 | 62.49956 | 44.92132 | 43.21412 |
| 26697 | LOC11961f | 0.296651 | -0.93378 | 3.994803 | -0.23375 | 0.81518  | NA       | 1.084173 | 0        | 0.695731 | 0        | 0        | 0        |
| 27431 | CAV3      | 0.296651 | -0.93378 | 3.994803 | -0.23375 | 0.81518  | NA       | 1.084173 | 0        | 0.695731 | 0        | 0        | 0        |
| 27964 | LOC11962f | 0.296651 | -0.93378 | 3.994803 | -0.23375 | 0.81518  | NA       | 1.084173 | 0        | 0.695731 | 0        | 0        | 0        |
| 29044 | LOC11962f | 0.296651 | -0.93378 | 3.994803 | -0.23375 | 0.81518  | NA       | 1.084173 | 0        | 0.695731 | 0        | 0        | 0        |
| 13695 | LOC11962f | 46.02494 | -0.93384 | 0.451417 | -2.06868 | 0.038576 | 0.074884 | 59.6295  | 82.65918 | 37.56949 | 37.94616 | 34.22577 | 24.11951 |
| 15917 | LOC11962f | 22.76236 | -0.93417 | 0.555455 | -1.68181 | 0.092605 | 0.154671 | 32.52518 | 25.18094 | 32.00364 | 20.08914 | 10.69555 | 16.07967 |
| 2464  | MTFP1     | 1230.692 | -0.93442 | 0.130184 | -7.17767 | 7.09E-13 | 7.65E-12 | 1730.34  | 1382.762 | 1735.154 | 877.2259 | 806.4447 | 852.2226 |
| 11117 | LOC10321f | 63.88584 | -0.93459 | 0.359575 | -2.59916 | 0.009345 | 0.022346 | 95.4072  | 67.33165 | 86.96642 | 49.10679 | 51.33866 | 33.16432 |
| 7634  | LOC11962f | 107.3515 | -0.93462 | 0.265956 | -3.51419 | 0.000441 | 0.001536 | 146.9054 | 136.853  | 140.5377 | 60.26743 | 79.14709 | 80.39836 |
| 1723  | GJA1      | 3259.067 | -0.93464 | 0.107895 | -8.66249 | 4.62E-18 | 7.12E-17 | 4085.705 | 4719.785 | 4038.721 | 2098.199 | 2216.119 | 2395.871 |
| 2669  | DHRS13    | 1498.986 | -0.93475 | 0.135943 | -6.87607 | 6.15E-12 | 6.13E-11 | 2182.44  | 1767.593 | 1961.962 | 1035.707 | 883.4527 | 1162.761 |
| 2961  | CARD10    | 6756.629 | -0.93509 | 0.144347 | -6.47803 | 9.29E-11 | 8.34E-10 | 9751.05  | 7234.047 | 9642.141 | 4470.95  | 3991.581 | 5450.004 |
| 8042  | ELMO3     | 130.2493 | -0.93537 | 0.274998 | -3.40138 | 0.00067  | 0.002216 | 178.3464 | 130.8314 | 204.545  | 100.4457 | 74.86887 | 92.45811 |
| 2067  | SLT2      | 1325.006 | -0.93542 | 0.119119 | -7.85286 | 4.07E-15 | 5.23E-14 | 1710.282 | 1875.98  | 1640.535 | 837.0476 | 896.2874 | 989.9048 |
| 1556  | CD6C      | 3273.618 | -0.93586 | 0.103191 | -9.06923 | 1.20E-19 | 2.05E-18 | 4137.745 | 4708.289 | 4057.505 | 2227.663 | 2149.806 | 2360.697 |
| 2032  | IQCB1     | 1192.568 | -0.93588 | 0.118375 | -7.90606 | 2.66E-15 | 3.48E-14 | 1672.879 | 1453.926 | 1573.744 | 861.601  | 755.1061 | 838.1529 |
| 16774 | LOC10323f | 17.54243 | -0.93628 | 0.612115 | -1.52958 | 0.126121 | 0.199887 | 23.8518  | 22.9913  | 22.2634  | 13.39276 | 10.69555 | 12.05975 |
| 1546  | NUSAP1    | 5818.172 | -0.9363  | 0.102845 | -9.1039  | 8.71E-20 | 1.50E-18 | 7185.355 | 8501.853 | 7245.346 | 3843.723 | 3935.964 | 4196.794 |
| 1990  | EXOSC8    | 1062.979 | -0.93642 | 0.116826 | -8.01551 | 1.10E-15 | 1.47E-14 | 1395.872 | 1300.65  | 1494.431 | 729.9055 | 712.3239 | 744.6898 |
| 2206  |           |          |          |          |          |          |          |          |          |          |          |          |          |



|       |          |          |          |          |          |          |          |          |          |          |          |          |          |
|-------|----------|----------|----------|----------|----------|----------|----------|----------|----------|----------|----------|----------|----------|
| 1350  | ARMCX2   | 2389.652 | -0.9371  | 0.096448 | -9.71609 | 2.57E-22 | 5.07E-21 | 3219.993 | 3184.295 | 3017.387 | 1671.863 | 1552.994 | 1691.38  |
| 813   | LOC10324 | 32431.73 | -0.93746 | 0.078116 | -12.0008 | 3.52E-33 | 1.15E-31 | 43875.39 | 41451.66 | 42516.84 | 22073.5  | 21782.56 | 22890.42 |
| 5815  | CUNH2orf | 193.696  | -0.93748 | 0.21971  | -4.2669  | 1.98E-05 | 9.06E-05 | 262.9119 | 239.219  | 265.7694 | 107.1421 | 128.3466 | 158.7868 |
| 29251 | LOC11962 | 0.297538 | -0.93777 | 3.994563 | -0.23476 | 0.814394 | NA       | 0.542086 | 0.547412 | 0.695731 | 0        | 0        | 0        |
| 8038  | LOC10322 | 118.6709 | -0.93784 | 0.275674 | -3.40199 | 0.000669 | 0.002213 | 156.1209 | 139.0426 | 173.2371 | 100.4457 | 57.75599 | 85.42325 |
| 5384  | LOC10324 | 174.1484 | -0.93794 | 0.209706 | -4.47266 | 7.73E-06 | 3.81E-05 | 233.0971 | 232.65   | 221.9383 | 116.0706 | 115.512  | 125.6224 |
| 3343  | TYW3     | 735.8228 | -0.93799 | 0.15631  | -6.00087 | 1.96E-09 | 1.56E-08 | 880.8904 | 1146.28  | 871.7514 | 560.2639 | 466.3261 | 489.425  |
| 2579  | RAB23    | 739.5407 | -0.93812 | 0.133816 | -7.01051 | 2.37E-12 | 2.45E-11 | 956.2404 | 1072.927 | 884.9703 | 513.3892 | 511.2474 | 498.4698 |
| 17914 | FCER2    | 17.8466  | -0.9382  | 0.690606 | -1.35851 | 0.174302 | 0.25867  | 28.18849 | 27.37059 | 14.61036 | 4.464254 | 21.39111 | 11.05477 |
| 22095 | SPATA9   | 3.659888 | -0.93884 | 1.321316 | -0.71053 | 0.477375 | 0.574358 | 4.878777 | 2.737059 | 6.957314 | 2.232127 | 2.139111 | 3.014938 |
| 1956  | PKP2     | 1851.49  | -0.93886 | 0.116248 | -8.07637 | 6.67E-16 | 9.07E-15 | 2326.635 | 2674.654 | 2306.349 | 1189.724 | 1225.71  | 1385.867 |
| 1872  | AI1      | 1632.976 | -0.93895 | 0.113821 | -8.24937 | 1.59E-16 | 2.26E-15 | 2017.103 | 2370.293 | 2053.103 | 1149.545 | 1063.138 | 1144.672 |
| 3951  | RPL34    | 8576.468 | -0.93917 | 0.173629 | -5.40905 | 6.34E-08 | 4.26E-07 | 13248.59 | 7498.994 | 13074.18 | 5912.904 | 5660.087 | 6064.046 |
| 2150  | ATF4     | 21302.17 | -0.93993 | 0.122369 | -7.68111 | 1.58E-14 | 1.95E-13 | 24946.81 | 33742.46 | 25329.49 | 14560.16 | 14385.52 | 14848.57 |
| 1268  | SNF8     | 3216.926 | -0.94019 | 0.094596 | -9.93901 | 2.82E-23 | 5.90E-22 | 4393.068 | 4270.36  | 4031.068 | 2120.521 | 2169.058 | 2317.483 |
| 2629  | ADAT1    | 572.5158 | -0.94042 | 0.135697 | -6.93025 | 4.20E-12 | 4.25E-11 | 735.6112 | 798.6738 | 724.2564 | 406.2471 | 374.3444 | 395.9619 |
| 19808 | LOC11962 | 8.286671 | -0.94086 | 0.894369 | -1.05198 | 0.292809 | 0.392989 | 11.9259  | 7.663765 | 13.2189  | 4.464254 | 6.417332 | 6.029877 |
| 20459 | LOC10322 | 7.305244 | -0.941   | 0.987966 | -0.95246 | 0.340862 | 0.442925 | 14.09425 | 9.306001 | 5.565851 | 6.696381 | 2.139111 | 6.029877 |
| 9978  | LOC11962 | 65.72878 | -0.94115 | 0.328289 | -2.86684 | 0.004146 | 0.011046 | 85.10756 | 81.56436 | 93.228   | 40.17829 | 47.06043 | 47.23404 |
| 27148 | CA1      | 0.298426 | -0.94174 | 3.994325 | -0.23577 | 0.813611 | NA       | 0        | 1.094824 | 0.695731 | 0        | 0        | 0        |
| 28540 | TRNAR-UC | 0.298426 | -0.94174 | 3.994325 | -0.23577 | 0.813611 | NA       | 0        | 1.094824 | 0.695731 | 0        | 0        | 0        |
| 29300 | LOC11962 | 0.298426 | -0.94174 | 3.994325 | -0.23577 | 0.813611 | NA       | 0        | 1.094824 | 0.695731 | 0        | 0        | 0        |
| 29419 | LOC11962 | 0.298426 | -0.94174 | 3.994325 | -0.23577 | 0.813611 | NA       | 0        | 1.094824 | 0.695731 | 0        | 0        | 0        |
| 3332  | ZNFA485  | 387.5607 | -0.9418  | 0.156721 | -6.00943 | 1.86E-09 | 1.49E-08 | 490.0461 | 526.6102 | 512.0583 | 243.3018 | 293.0582 | 260.2897 |
| 21551 | SLC35F1  | 5.476304 | -0.94204 | 1.182656 | -0.79655 | 0.425713 | 0.525153 | 8.131296 | 8.758589 | 4.174388 | 2.232127 | 8.556443 | 1.004979 |
| 6758  | SLC6A13  | 176.5096 | -0.94251 | 0.24596  | -3.83196 | 0.000127 | 0.0005   | 256.9489 | 195.426  | 240.0273 | 136.1597 | 139.0422 | 91.45313 |
| 8708  | LOC11962 | 104.5572 | -0.94252 | 0.29451  | -3.20028 | 0.001373 | 0.004191 | 162.0838 | 102.9134 | 148.1908 | 69.19594 | 70.59065 | 74.36848 |
| 22787 | LOC10322 | 2.991438 | -0.94254 | 1.584415 | -0.59488 | 0.551922 | 0.643936 | 4.878777 | 4.379295 | 2.087194 | 4.464254 | 2.139111 | 0        |
| 2443  | RFC1     | 10599.46 | -0.94272 | 0.130905 | -7.20154 | 5.95E-13 | 6.48E-12 | 12560.14 | 17117.02 | 12156.51 | 7026.736 | 7362.819 | 7373.534 |
| 4359  | LOC11962 | 1006.974 | -0.94276 | 0.18462  | -5.10646 | 3.28E-07 | 2.00E-06 | 1576.387 | 921.8415 | 1475.646 | 723.2091 | 667.4025 | 677.3562 |
| 1512  | ANAPC1   | 9117.623 | -0.94297 | 0.102296 | -9.21812 | 3.02E-20 | 5.32E-19 | 11632.09 | 13257.77 | 11103.18 | 6149.51  | 5908.224 | 6654.974 |
| 2768  | LOC11962 | 6799.126 | -0.94305 | 0.139817 | -6.74493 | 1.53E-11 | 1.47E-10 | 9030.075 | 7337.508 | 10461.71 | 5004.429 | 4954.18  | 4006.853 |
| 1867  | TTTC39B  | 2217.623 | -0.94313 | 0.114214 | -8.25753 | 1.49E-16 | 2.12E-15 | 2865.469 | 3219.876 | 2673.696 | 1470.972 | 1439.621 | 1636.107 |
| 12795 | CNS5A    | 54.64701 | -0.94332 | 0.420983 | -2.24075 | 0.025042 | 0.052034 | 64.50828 | 76.63765 | 71.66033 | 44.64254 | 51.33866 | 19.09461 |
| 3869  | GMEB1    | 447.6991 | -0.94353 | 0.172197 | -5.47934 | 4.27E-08 | 2.93E-07 | 574.6116 | 688.6441 | 504.4052 | 325.8905 | 278.0844 | 314.5586 |
| 24488 | LOC11962 | 0.975427 | -0.94377 | 2.839032 | -0.33243 | 0.739566 | 0.802833 | 1.626259 | 0        | 2.087194 | 0        | 2.139111 | 0        |
| 2083  | PDZD8    | 7333.383 | -0.94407 | 0.120668 | -7.82372 | 5.13E-15 | 6.55E-14 | 8811.072 | 11415.18 | 8729.342 | 4843.716 | 4917.815 | 5283.177 |
| 2265  | GPS1     | 4155.955 | -0.9448  | 0.126376 | -7.47612 | 7.65E-14 | 8.98E-13 | 5880.011 | 4626.177 | 5912.325 | 2714.266 | 2633.245 | 3169.705 |
| 2484  | EBF1     | 1517.981 | -0.94543 | 0.132202 | -7.15141 | 8.59E-13 | 9.19E-12 | 1733.05  | 2329.237 | 1934.133 | 1031.243 | 1013.938 | 1066.283 |
| 7131  | LMCD1    | 138.3703 | -0.94549 | 0.256513 | -3.68593 | 0.000228 | 0.00085  | 183.2252 | 149.9908 | 212.1981 | 89.28508 | 109.0946 | 86.42823 |
| 2331  | GPATCH8  | 3307.842 | -0.94564 | 0.128362 | -7.36702 | 1.74E-13 | 1.99E-12 | 4011.981 | 5213.55  | 3839.741 | 2261.145 | 2201.145 | 2319.493 |
| 21795 | LOC11962 | 4.072288 | -0.94578 | 1.243658 | -0.76048 | 0.446967 | 0.545203 | 5.420864 | 4.926706 | 5.565851 | 2.232127 | 4.278221 | 2.009959 |
| 3374  | ZFP92    | 527.1854 | -0.94589 | 0.158598 | -5.96405 | 2.46E-09 | 1.94E-08 | 678.15   | 792.6523 | 612.9393 | 325.8905 | 378.6226 | 374.8573 |
| 2728  | TNFAIP8  | 539.7574 | -0.94619 | 0.138995 | -6.80742 | 9.94E-12 | 9.68E-11 | 673.2713 | 743.3852 | 717.9948 | 368.301  | 348.675  | 386.9171 |
| 8931  | LOC10322 | 84.22147 | -0.94653 | 0.301729 | -3.13702 | 0.001707 | 0.005081 | 106.791  | 102.9134 | 124.5359 | 46.87467 | 59.8951  | 64.31869 |
| 16352 | RUBCNL   | 21.99096 | -0.94668 | 0.593272 | -1.59569 | 0.110558 | 0.179744 | 35.7777  | 24.08612 | 25.74206 | 22.32127 | 14.97377 | 9.044815 |
| 9973  | DLL3     | 82.851   | -0.94673 | 0.329935 | -2.86945 | 0.004112 | 0.010961 | 120.3432 | 78.27989 | 128.0146 | 64.73168 | 53.47777 | 52.25893 |
| 1323  | EIF3D    | 13433.91 | -0.94691 | 0.096743 | -9.78795 | 1.27E-22 | 2.55E-21 | 17237.8  | 19214.7  | 16627.28 | 9024.489 | 8697.624 | 9801.565 |
| 8113  | EMP1     | 91.2252  | -0.94738 | 0.280711 | -3.37492 | 0.000738 | 0.00242  | 112.2119 | 120.978  | 127.3188 | 62.49956 | 62.03421 | 62.30873 |
| 2414  | KAT8     | 1182.903 | -0.94744 | 0.13066  | -7.25121 | 4.13E-13 | 4.55E-12 | 1743.892 | 1360.866 | 1572.353 | 796.8693 | 772.219  | 851.2176 |
| 22591 | LOC11962 | 3.208152 | -0.94762 | 1.514256 | -0.6258  | 0.531447 | 0.625405 | 3.794605 | 1.642235 | 7.653045 | 0        | 2.139111 | 4.019918 |
| 2697  | AATF     | 3880.922 | -0.94789 | 0.138623 | -6.83791 | 8.04E-12 | 7.92E-11 | 4592.014 | 6286.477 | 4459.638 | 2683.017 | 2468.534 | 2795.853 |
| 2567  | ECSIT    | 1199.705 | -0.94807 | 0.134927 | -7.02654 | 2.12E-12 | 2.19E-11 | 1623.007 | 1491.697 | 1636.36  | 763.3874 | 723.0194 | 960.7604 |
| 3874  | NUDT1    | 507.1213 | -0.94819 | 0.173256 | -5.47277 | 4.43E-08 | 3.04E-07 | 694.4126 | 578.6143 | 733.3009 | 390.6222 | 275.9453 | 369.8324 |
| 1889  | EXO1     | 2071.14  | -0.94873 | 0.115431 | -8.21897 | 2.05E-16 | 2.89E-15 | 2672.486 | 3029.377 | 2488.631 | 1395.079 | 1334.805 | 1506.464 |
| 2286  | HMGGB3   | 2540.373 | -0.94899 | 0.127501 | -7.44302 | 9.84E-14 | 1.14E-12 | 3086.098 | 3974.21  | 2979.817 | 1754.452 | 1724.123 | 1723.54  |
| 15717 | LOC10324 | 27.84645 | -0.94951 | 0.55355  | -1.71531 | 0.086288 | 0.145955 | 33.60935 | 50.36189 | 25.04633 | 29.01765 | 14.97377 | 14.06971 |
| 2578  | CSTF2    | 792.1789 | -0.94999 | 0.135469 | -7.01261 | 2.34E-12 | 2.41E-11 | 1049.479 | 1019.281 | 1070.731 | 466.5145 | 539.0559 | 608.0126 |
| 20884 | TINAGL1  | 6.164361 | -0.95007 | 1.064817 | -0.89224 | 0.372263 | 0.473871 | 11.38381 | 8.758589 | 4.174388 | 2.232127 | 6.417332 | 4.019918 |
| 1732  | BSDC1    | 2909.094 | -0.95023 | 0.110037 | -8.6356  | 5.84E-18 | 8.97E-17 | 3975.119 | 3777.689 | 3760.428 | 1810.255 | 1890.974 | 2240.099 |
| 15678 | LOC11962 | 23.53923 | -0.95024 | 0.552019 | -1.72139 | 0.085179 | 0.144437 | 32.52518 | 31.20247 | 28.52499 | 13.39276 | 23.53022 | 12.05975 |
| 1933  | TMEM237  | 1354.9   | -0.95054 | 0.116908 | -8.13065 | 4.27E-16 | 5.87E-15 | 1869.656 | 1642.235 | 1849.95  | 845.9761 | 949.7651 | 971.8151 |
| 3888  | CUNH9orf | 497.3928 | -0.95062 | 0.174207 | -5.45684 | 4.85E-08 | 3.31E-07 | 617.4364 | 754.8809 | 591.3717 | 303.5693 | 408.5701 | 308.5287 |
| 1644  | PHF19    | 2210.855 | -0.95119 | 0.107277 | -8.86666 | 7.54E-19 | 1.22E-17 | 2997.738 | 2989.416 | 2764.141 | 1470.972 | 1394.7   | 1648.166 |
| 5768  | LRRN3    | 213.5039 | -0.95123 | 0.221751 | -4.2896  | 1.79E-05 | 8.25E-05 | 258.0331 | 332.8264 | 250.4633 | 145.0883 | 168.9897 | 125.6224 |
| 15933 | LOC10323 | 25.12124 | -0.95161 | 0.566964 | -1.67843 | 0.093262 | 0.155595 | 40.11439 | 36.67659 | 22.95914 | 22.32127 | 8.556443 | 20.09959 |
| 1392  | LADA2A   | 2241.638 | -0.95218 | 0.099663 | -9.55402 | 1.25E-21 | 2.38E-20 | 2946.239 | 3130.648 | 2792.666 | 1479.9   | 1531.603 | 1568.773 |
| 1675  | GYG2     | 1194.617 | -0.95233 | 0.108356 | -8.78888 | 1.51E-18 | 2.40E-17 | 1593.192 | 1590.779 | 1541.741 | 772.3159 | 855.6443 | 814.0334 |
| 1650  | RPL26    | 32328.03 | -0.95273 | 0.107635 | -8.85151 | 8.63E-19 | 1.39E-17 | 38953.78 | 46012.15 | 42915.49 | 23104.75 | 23536.63 | 19445.35 |
| 1493  | CPSF2    | 5166.976 | -0.95327 | 0.102913 | -9.26288 | 1.99E-20 | 3.54E-19 | 6554.908 | 7605.74  | 6284.541 | 3522.296 | 3437.551 | 3596.822 |
| 2332  | LSM6     | 1885.692 | -0.95349 | 0.1295   | -7.36288 | 1.80E-13 | 2.05E-12 | 2192.197 | 2825.192 | 2437.843 | 1301.33  | 1396.839 | 1160.751 |
| 23600 | LOC11962 | 2.047488 | -0.95363 | 2.036071 | -0.46837 | 0.639522 | 0.720411 | 3.794605 | 0.547    |          |          |          |          |



|       |           |          |          |          |          |          |          |          |          |          |          |          |          |
|-------|-----------|----------|----------|----------|----------|----------|----------|----------|----------|----------|----------|----------|----------|
| 1935  | LOC103246 | 831.4622 | -0.95489 | 0.117514 | -8.12571 | 4.45E-16 | 6.11E-15 | 1106.94  | 1113.436 | 1070.035 | 584.8173 | 549.7514 | 563.7935 |
| 1302  | RPRD1A    | 2433.686 | -0.95548 | 0.09702  | -9.84825 | 6.98E-23 | 1.42E-21 | 3312.69  | 3103.278 | 3222.628 | 1678.559 | 1559.412 | 1725.55  |
| 19703 | LOC119615 | 9.25919  | -0.9556  | 0.893722 | -1.06923 | 0.284964 | 0.384479 | 17.34676 | 10.40082 | 8.348776 | 11.16063 | 4.278221 | 4.019918 |
| 16783 | LOC103220 | 18.44262 | -0.95572 | 0.625274 | -1.52849 | 0.126391 | 0.20021  | 21.14137 | 22.44388 | 28.52499 | 13.39276 | 17.11289 | 8.039836 |
| 1215  | TRMT112   | 4717.488 | -0.95663 | 0.094592 | -10.1133 | 4.83E-24 | 1.06E-22 | 5902.778 | 6756.157 | 6020.859 | 3241.048 | 3170.162 | 3213.924 |
| 3759  | MRM1      | 595.301  | -0.95696 | 0.171361 | -5.58449 | 2.34E-08 | 1.66E-07 | 900.4055 | 668.9372 | 794.5252 | 359.3724 | 372.2053 | 476.3603 |
| 1863  | LGALSL    | 1169.172 | -0.95707 | 0.115692 | -8.27258 | 1.31E-16 | 1.87E-15 | 1549.283 | 1557.387 | 1530.609 | 779.0123 | 729.4367 | 869.3072 |
| 1621  | RPL18     | 19924.54 | -0.9572  | 0.107338 | -8.91762 | 4.76E-19 | 7.81E-18 | 28344.61 | 22532.57 | 28029.63 | 13870.44 | 13172.64 | 13597.37 |
| 10423 | LOC103241 | 72.23112 | -0.95732 | 0.346676 | -2.76142 | 0.005755 | 0.014679 | 105.7068 | 101.8186 | 79.31338 | 31.24978 | 62.03421 | 53.26391 |
| 11471 | LOC103242 | 91.09967 | -0.95739 | 0.379508 | -2.52271 | 0.011646 | 0.026988 | 130.1007 | 62.95236 | 167.6713 | 60.26743 | 66.31243 | 59.29379 |
| 2223  | NUP85     | 2632.01  | -0.9575  | 0.126632 | -7.56127 | 3.99E-14 | 4.77E-13 | 3898.143 | 3061.127 | 3473.091 | 1633.917 | 1719.845 | 2005.939 |
| 2500  | LOC103248 | 688.7641 | -0.95759 | 0.134223 | -7.13433 | 9.73E-13 | 1.03E-11 | 860.8332 | 978.7723 | 888.449  | 502.2286 | 429.9612 | 472.3404 |
| 1390  | SLC38A1   | 10965.31 | -0.95773 | 0.100164 | -9.56158 | 1.16E-21 | 2.22E-20 | 13748.94 | 15945.01 | 13744.17 | 7153.967 | 7215.22  | 7984.562 |
| 2278  | PHC1      | 1253.829 | -0.95788 | 0.128529 | -7.45267 | 9.15E-14 | 1.07E-12 | 1540.067 | 1886.929 | 1543.132 | 830.3512 | 815.0012 | 907.4965 |
| 2090  | DUS1L     | 2445.974 | -0.95871 | 0.122787 | -7.80788 | 5.82E-15 | 7.40E-14 | 3392.376 | 2954.929 | 3353.425 | 1571.417 | 1495.238 | 1908.456 |
| 6414  | LOC119622 | 273.9688 | -0.95914 | 0.241357 | -3.97395 | 7.07E-05 | 0.000293 | 434.7533 | 263.8525 | 391.001  | 176.338  | 149.7377 | 228.1303 |
| 4508  | CUNH16or  | 314.8192 | -0.95933 | 0.191559 | -5.00802 | 5.50E-07 | 3.24E-06 | 466.1943 | 347.6065 | 436.9193 | 205.3557 | 194.6591 | 238.1801 |
| 8819  | LOC119626 | 90.72302 | -0.96076 | 0.303262 | -3.16808 | 0.001534 | 0.004626 | 98.11763 | 133.0211 | 126.6231 | 64.73168 | 70.59065 | 51.25395 |
| 17202 | LOC103215 | 16.28278 | -0.96078 | 0.654673 | -1.46757 | 0.142222 | 0.219799 | 25.47806 | 15.87494 | 23.65487 | 8.928508 | 10.69555 | 13.06473 |
| 1396  | MAPKAP1   | 4024.369 | -0.96083 | 0.100788 | -9.5332  | 1.53E-21 | 2.90E-20 | 5002.373 | 5830.483 | 5119.887 | 2799.087 | 2607.576 | 2786.808 |
| 2230  | OFD1      | 3347.434 | -0.96137 | 0.127345 | -7.54934 | 4.37E-14 | 5.22E-13 | 4093.836 | 5281.977 | 3892.617 | 2249.984 | 2323.074 | 2243.114 |
| 20065 | TRNAL-CA1 | 7.375096 | -0.96148 | 0.944194 | -1.01831 | 0.308532 | 0.408787 | 11.9259  | 7.116354 | 10.43597 | 4.464254 | 4.278221 | 6.029877 |
| 4181  | LOC103218 | 253.5199 | -0.96192 | 0.183609 | -5.23897 | 1.61E-07 | 1.03E-06 | 330.1306 | 352.5332 | 320.0364 | 187.4987 | 171.1289 | 159.7917 |
| 8033  | SMIM4     | 218.3763 | -0.96215 | 0.282701 | -3.40342 | 0.000665 | 0.002202 | 327.9623 | 175.7192 | 364.5632 | 145.0883 | 124.0684 | 172.8565 |
| 21040 | LOC119627 | 6.229978 | -0.96222 | 1.099866 | -0.87485 | 0.381656 | 0.48224  | 10.84173 | 2.737059 | 11.1317  | 2.232127 | 6.417332 | 4.019918 |
| 2602  | TICRR     | 1105.259 | -0.96234 | 0.137922 | -6.97746 | 3.01E-12 | 3.07E-11 | 1375.815 | 1640.593 | 1373.374 | 667.406  | 725.1585 | 849.2077 |
| 8098  | LOC119628 | 116.5465 | -0.96374 | 0.285045 | -3.38102 | 0.000722 | 0.002371 | 180.5148 | 113.8617 | 168.367  | 78.12444 | 77.00798 | 81.40334 |
| 13405 | TRNAA-AG  | 56.67926 | -0.9638  | 0.453339 | -2.12601 | 0.033503 | 0.066443 | 94.32303 | 37.77142 | 93.228   | 46.87467 | 25.66933 | 42.20914 |
| 1923  | LOC103243 | 5149.012 | -0.96422 | 0.118367 | -8.14602 | 3.76E-16 | 5.20E-15 | 7535.001 | 5872.634 | 7024.8   | 3294.619 | 3354.126 | 3812.892 |
| 1467  | SFXN4     | 1876.394 | -0.96438 | 0.103356 | -9.33063 | 1.05E-20 | 1.91E-19 | 2615.567 | 2337.448 | 2494.893 | 1241.063 | 1242.823 | 1326.573 |
| 4925  | LOC103234 | 290.2139 | -0.96457 | 0.203892 | -4.73077 | 2.24E-06 | 1.21E-05 | 432.5849 | 300.5291 | 419.526  | 198.6593 | 183.9635 | 206.0208 |
| 7113  | CTBS      | 117.2419 | -0.96502 | 0.261387 | -3.69191 | 0.000223 | 0.000832 | 151.2421 | 158.202  | 157.931  | 82.5887  | 62.03421 | 91.45313 |
| 2394  | LOC103245 | 3684.786 | -0.96541 | 0.132615 | -7.27974 | 3.34E-13 | 3.71E-12 | 4433.724 | 5931.207 | 4256.485 | 2459.804 | 2489.925 | 2537.573 |
| 5410  | LOC103220 | 260.2343 | -0.96547 | 0.216641 | -4.45655 | 8.33E-06 | 4.09E-05 | 400.6018 | 262.2103 | 370.8248 | 165.1774 | 179.6853 | 182.9063 |
| 2744  | TM6SF1    | 669.6514 | -0.96584 | 0.142453 | -6.78006 | 1.20E-11 | 1.16E-10 | 978.4659 | 814.5488 | 866.8813 | 473.2109 | 406.431  | 478.3702 |
| 1572  | MRPL38    | 2694.68  | -0.96614 | 0.106806 | -9.04576 | 1.49E-19 | 2.51E-18 | 3744.191 | 3378.626 | 3580.929 | 1714.274 | 1739.097 | 2010.964 |
| 21771 | LOC119615 | 4.778982 | -0.96623 | 1.263629 | -0.76465 | 0.444481 | 0.542764 | 7.589209 | 2.737059 | 9.044508 | 0        | 4.278221 | 5.024897 |
| 1116  | OGT       | 9217.941 | -0.96627 | 0.092401 | -10.4574 | 1.36E-25 | 3.23E-24 | 11977.4  | 12706.52 | 11909.53 | 6062.457 | 5893.25  | 6758.487 |
| 8224  | LOC119624 | 99.43745 | -0.96631 | 0.289369 | -3.33937 | 0.00084  | 0.002714 | 115.4644 | 146.159  | 135.6676 | 58.0353  | 59.8951  | 81.40334 |
| 3196  | PLCXD1    | 666.3569 | -0.96657 | 0.156766 | -6.16568 | 7.02E-10 | 5.84E-09 | 996.3547 | 760.355  | 893.3191 | 433.0326 | 408.5701 | 506.5097 |
| 2851  | SYT10     | 2489.936 | -0.96668 | 0.146266 | -6.60906 | 3.87E-11 | 3.61E-10 | 2929.977 | 4128.58  | 2824.669 | 1687.488 | 1651.393 | 1717.51  |
| 1411  | ENTR1     | 1937.954 | -0.96676 | 0.101883 | -9.48898 | 2.33E-21 | 4.40E-20 | 2632.371 | 2511.525 | 2554.03  | 1214.277 | 1332.666 | 1382.852 |
| 1216  | RPS2      | 67933.98 | -0.96707 | 0.095659 | -10.1096 | 5.01E-24 | 1.10E-22 | 92894.63 | 82372.34 | 94401.01 | 46399.22 | 42713.76 | 48822.91 |
| 1341  | LRRC59    | 10961.56 | -0.96766 | 0.099362 | -9.73875 | 2.06E-22 | 4.09E-21 | 14181.52 | 15870.56 | 13472.14 | 7272.27  | 7052.648 | 7920.243 |
| 2556  | TFAP4     | 655.1932 | -0.96782 | 0.137496 | -7.03894 | 1.94E-12 | 2.01E-11 | 904.2001 | 802.5057 | 896.102  | 473.2109 | 397.8746 | 457.2657 |
| 15160 | LOC103215 | 34.78031 | -0.96791 | 0.536547 | -1.80397 | 0.071236 | 0.124922 | 46.61943 | 67.33165 | 22.95914 | 29.01765 | 25.66933 | 17.08465 |
| 2312  | PAFAH2    | 803.2035 | -0.96811 | 0.1309   | -7.39576 | 1.41E-13 | 1.62E-12 | 1117.782 | 976.0353 | 1098.56  | 493.3001 | 564.7252 | 568.8184 |
| 1355  | SH3RF1    | 2372.889 | -0.96827 | 0.099788 | -9.70323 | 2.92E-22 | 5.73E-21 | 3015.626 | 3362.203 | 3047.303 | 1562.489 | 1591.498 | 1658.216 |
| 1724  | WDHD1     | 3436.282 | -0.96836 | 0.111805 | -8.66117 | 4.67E-18 | 7.20E-17 | 4425.051 | 5079.982 | 4145.168 | 2216.502 | 2254.623 | 2496.369 |
| 6828  | LOC103220 | 179.0229 | -0.96863 | 0.254379 | -3.80781 | 0.00014  | 0.000546 | 190.2723 | 295.6024 | 221.9383 | 140.624  | 126.2075 | 99.49273 |
| 19764 | DNASE2B   | 8.75591  | -0.9691  | 0.915001 | -1.05912 | 0.289545 | 0.389473 | 14.63633 | 10.40082 | 9.044508 | 11.16063 | 4.278221 | 3.014938 |
| 7235  | LOC103246 | 327.1493 | -0.96916 | 0.265051 | -3.65648 | 0.000256 | 0.00094  | 526.908  | 253.4517 | 521.1028 | 189.7308 | 222.4675 | 249.2349 |
| 691   | RPL12     | 39993.55 | -0.96917 | 0.075295 | -12.8717 | 6.50E-38 | 2.50E-36 | 52360.66 | 52334.76 | 54132.77 | 27479.72 | 26991.3  | 26662.11 |
| 4208  | HAUS3     | 533.4153 | -0.96929 | 0.186011 | -5.21091 | 1.88E-07 | 1.19E-06 | 609.8472 | 899.3976 | 607.3735 | 357.1403 | 385.0399 | 341.693  |
| 7670  | AKAP3     | 107.5553 | -0.9694  | 0.276719 | -3.50318 | 0.00046  | 0.001593 | 138.7741 | 152.7279 | 133.5804 | 66.96381 | 91.98176 | 61.30375 |
| 13453 | LOC119627 | 46.4589  | -0.96957 | 0.458087 | -2.11657 | 0.034297 | 0.067775 | 75.35001 | 37.224   | 73.74753 | 24.5534  | 25.66933 | 42.20914 |
| 11643 | TXNDC17   | 1378.957 | -0.96977 | 0.390266 | -2.4849  | 0.012959 | 0.02959  | 2239.901 | 955.781  | 2281.999 | 908.4757 | 902.7047 | 984.8799 |
| 13837 | LOC119627 | 39.19855 | -0.97031 | 0.475141 | -2.04215 | 0.041136 | 0.079035 | 69.38706 | 46.53    | 41.74388 | 20.08914 | 19.252   | 38.18922 |
| 1826  | LOC103247 | 1501.978 | -0.97033 | 0.11579  | -8.38008 | 5.29E-17 | 7.70E-16 | 2109.258 | 2042.393 | 1815.859 | 1071.421 | 934.7914 | 1038.144 |
| 2041  | MKS1      | 962.4643 | -0.97068 | 0.123    | -7.89173 | 2.98E-15 | 3.88E-14 | 1354.132 | 1186.789 | 1287.799 | 624.9956 | 624.6203 | 696.4508 |
| 2046  | TGM2      | 2924.989 | -0.97076 | 0.123069 | -7.88794 | 3.07E-15 | 3.99E-14 | 3686.187 | 4149.929 | 3795.215 | 1921.861 | 1713.428 | 2283.313 |
| 9353  | EMID1     | 87.81419 | -0.97099 | 0.321726 | -3.01805 | 0.002544 | 0.007231 | 128.4745 | 93.60742 | 124.5359 | 58.0353  | 77.00798 | 45.22408 |
| 1758  | PUM1      | 6672.416 | -0.97136 | 0.113251 | -8.57701 | 9.74E-18 | 1.47E-16 | 8417.517 | 10011.61 | 8088.573 | 4566.932 | 4119.927 | 4829.931 |
| 2526  | YEATS4    | 922.8072 | -0.97149 | 0.13709  | -7.08655 | 1.38E-12 | 1.45E-11 | 1108.025 | 1325.284 | 1226.574 | 660.7096 | 669.5416 | 546.7088 |
| 11540 | LOC119627 | 57.09057 | -0.9715  | 0.387763 | -2.50538 | 0.012232 | 0.028179 | 74.80792 | 71.16354 | 83.48776 | 22.32127 | 38.50399 | 52.25893 |
| 8397  | LOC119626 | 90.33369 | -0.97297 | 0.296398 | -3.28265 | 0.001028 | 0.003254 | 124.1378 | 114.4091 | 122.4487 | 64.73168 | 44.92132 | 71.35354 |
| 2453  | RPS16     | 17306.4  | -0.97342 | 0.135289 | -7.19517 | 6.24E-13 | 6.76E-12 | 17715.38 | 24700.86 | 26383.53 | 11665.1  | 11713.77 | 11659.77 |
| 14386 | LOC103234 | 32.11466 | -0.97352 | 0.500076 | -1.94675 | 0.051565 | 0.095291 | 47.7036  | 47.62483 | 33.39511 | 11.16063 | 25.66933 | 27.13445 |
| 18778 | LOC103246 | 11.26296 | -0.97356 | 0.79713  | -1.22133 | 0.221961 | 0.314225 | 14.63633 | 14.78012 | 14.61036 | 6.696381 | 12.83466 | 4.019918 |
| 6291  | CCDC122   | 170.1273 | -0.97385 | 0.241637 | -4.03023 | 5.57E-05 | 0.000235 | 190.2723 | 277.5378 | 207.3279 | 118.3027 | 119.7902 | 107.5328 |
| 1845  | SPATA5    | 1178.901 | -0.97403 | 0.       |          |          |          |          |          |          |          |          |          |



|       |          |          |          |          |          |          |          |          |          |          |          |          |          |
|-------|----------|----------|----------|----------|----------|----------|----------|----------|----------|----------|----------|----------|----------|
| 13171 | PYY      | 36.33131 | -0.97494 | 0.447942 | -2.17649 | 0.029519 | 0.059582 | 40.11439 | 45.43518 | 59.13717 | 26.78552 | 21.39111 | 25.12449 |
| 1330  | LOC10324 | 2110.589 | -0.97505 | 0.099811 | -9.76901 | 1.53E-22 | 3.05E-21 | 2831.317 | 2932.485 | 2631.256 | 1381.687 | 1439.621 | 1447.17  |
| 22638 | LOC11962 | 3.052073 | -0.97527 | 1.579526 | -0.61744 | 0.536942 | 0.63056  | 2.710432 | 2.737059 | 6.261582 | 4.464254 | 2.139111 | 0        |
| 12888 | NEFL     | 47.02969 | -0.97545 | 0.439206 | -2.22093 | 0.026356 | 0.054365 | 65.05036 | 59.66789 | 59.8329  | 33.4819  | 47.06043 | 17.08465 |
| 2734  | LUC7L3   | 8930.923 | -0.97551 | 0.14342  | -6.80181 | 1.03E-11 | 1.00E-10 | 10049.74 | 15045.61 | 10424.84 | 5950.851 | 6149.943 | 5964.553 |
| 7808  | LOC10323 | 105.2624 | -0.97571 | 0.281717 | -3.46343 | 0.000533 | 0.001816 | 127.9324 | 160.3917 | 128.7103 | 87.05295 | 64.17332 | 63.31371 |
| 22154 | HCRT     | 3.145413 | -0.97588 | 1.396247 | -0.69893 | 0.484593 | 0.581516 | 4.336691 | 3.284471 | 4.87012  | 2.232127 | 2.139111 | 2.009959 |
| 8016  | LOC10322 | 138.6982 | -0.97603 | 0.286444 | -3.40741 | 0.000656 | 0.002175 | 223.3396 | 133.5685 | 193.4133 | 118.3027 | 79.14709 | 84.41828 |
| 6887  | LOC11962 | 205.938  | -0.9761  | 0.258171 | -3.78082 | 0.000156 | 0.000603 | 205.4507 | 367.3133 | 245.5932 | 129.4634 | 156.1551 | 131.6523 |
| 1519  | RBFA     | 2297.002 | -0.97627 | 0.106396 | -9.17585 | 4.48E-20 | 7.84E-19 | 2964.128 | 3333.738 | 2842.063 | 1484.364 | 1565.829 | 1591.887 |
| 20164 | LOC11962 | 7.517876 | -0.97686 | 0.975481 | -1.00141 | 0.316628 | 0.417454 | 13.55216 | 6.568942 | 10.43597 | 2.232127 | 4.278221 | 8.039836 |
| 4817  | LOC11962 | 788.9117 | -0.97722 | 0.203533 | -4.80126 | 1.58E-06 | 8.70E-06 | 1228.91  | 684.8122 | 1225.183 | 520.0856 | 551.8906 | 522.5893 |
| 8726  | LOC10323 | 271.3091 | -0.97753 | 0.306008 | -3.19447 | 0.001401 | 0.004268 | 226.05   | 576.9721 | 277.5968 | 174.1059 | 171.1289 | 202.0009 |
| 11509 | LOC10324 | 52.77099 | -0.97779 | 0.389198 | -2.51232 | 0.011994 | 0.027704 | 72.09749 | 68.97389 | 68.87741 | 49.10679 | 21.39111 | 36.17926 |
| 11949 | LOC10322 | 54.52942 | -0.97785 | 0.405035 | -2.41424 | 0.015768 | 0.035082 | 53.12446 | 100.7238 | 62.61582 | 40.17829 | 36.36488 | 34.1693  |
| 1726  | HSPA9    | 39255.32 | -0.97826 | 0.113064 | -8.65226 | 5.05E-18 | 7.78E-17 | 48744.41 | 60856.32 | 46632.79 | 26042.23 | 25705.69 | 27550.51 |
| 11108 | LOC10324 | 55.36584 | -0.97856 | 0.375869 | -2.60347 | 0.009229 | 0.022087 | 72.63957 | 88.1333  | 58.44144 | 40.17829 | 40.6431  | 32.15934 |
| 1859  | DKC1     | 3684.542 | -0.97861 | 0.118182 | -8.28055 | 1.23E-16 | 1.75E-15 | 4641.343 | 5591.812 | 4436.679 | 2493.286 | 2290.988 | 2653.146 |
| 2000  | TWINK    | 1630.774 | -0.97868 | 0.122519 | -7.98794 | 1.37E-15 | 1.82E-14 | 2115.221 | 2355.513 | 2028.753 | 1017.85  | 1033.19  | 1234.115 |
| 11166 | LOC11962 | 67.09488 | -0.97885 | 0.378269 | -2.5877  | 0.009662 | 0.023004 | 111.1277 | 57.47824 | 98.09812 | 40.17829 | 53.47777 | 42.20914 |
| 4071  | LOC10322 | 259.3219 | -0.97898 | 0.184084 | -5.31813 | 1.05E-07 | 6.85E-07 | 317.1205 | 348.7013 | 365.9547 | 189.7308 | 162.5724 | 171.8515 |
| 8639  | LOC10324 | 97.19647 | -0.979   | 0.304256 | -3.2177  | 0.001292 | 0.003977 | 115.4644 | 154.3701 | 119.6658 | 49.10679 | 64.17332 | 80.39836 |
| 16918 | MZB1     | 16.26163 | -0.98001 | 0.65179  | -1.50357 | 0.132693 | 0.208513 | 27.10432 | 20.25424 | 17.39328 | 8.928508 | 12.83466 | 11.05477 |
| 6449  | LOC10323 | 147.4151 | -0.98035 | 0.24753  | -3.96054 | 7.48E-05 | 0.000308 | 205.4507 | 203.0898 | 174.6286 | 113.8385 | 109.0946 | 78.3884  |
| 5907  | LOC11962 | 488.2866 | -0.98041 | 0.232995 | -4.20787 | 2.58E-05 | 0.000116 | 808.7929 | 401.2529 | 735.3881 | 334.819  | 303.7537 | 345.7129 |
| 6236  | FAAP24   | 135.3582 | -0.98072 | 0.241659 | -4.05829 | 4.94E-05 | 0.000211 | 174.5518 | 185.5726 | 181.5859 | 80.35657 | 85.56443 | 104.5179 |
| 5149  | LOC10324 | 180.3885 | -0.98185 | 0.213285 | -4.60345 | 4.16E-06 | 2.15E-05 | 237.9759 | 257.2836 | 224.0255 | 129.4634 | 106.9555 | 126.6274 |
| 2106  | MB21D2   | 871.3999 | -0.9819  | 0.126011 | -7.79221 | 6.58E-15 | 8.31E-14 | 1209.395 | 1164.892 | 1102.734 | 564.7281 | 545.4732 | 641.1769 |
| 12109 | LOC11962 | 44.10172 | -0.98194 | 0.411836 | -2.3843  | 0.017112 | 0.037566 | 58.54533 | 64.04718 | 52.17985 | 40.17829 | 23.53022 | 26.12947 |
| 2722  | LOC10322 | 6936.85  | -0.98213 | 0.144158 | -6.81291 | 9.56E-12 | 9.34E-11 | 9894.16  | 6988.259 | 10748.35 | 4854.876 | 4680.374 | 4455.074 |
| 3543  | SNRPD2   | 5196.33  | -0.98232 | 0.169053 | -5.81076 | 6.22E-09 | 4.67E-08 | 7887.899 | 4717.048 | 8096.922 | 3446.404 | 3426.855 | 3602.851 |
| 700   | RPL4     | 59049.73 | -0.98279 | 0.076614 | -12.8277 | 1.15E-37 | 4.36E-36 | 80010.32 | 77731.93 | 77521.17 | 39392.58 | 38679.4  | 40962.96 |
| 18592 | LOC11961 | 14.43421 | -0.98287 | 0.795015 | -1.2363  | 0.216349 | 0.309361 | 23.8518  | 7.116354 | 27.13352 | 11.16063 | 4.278221 | 13.06473 |
| 5531  | SPRY1    | 156.2471 | -0.98305 | 0.223419 | -4.40001 | 1.08E-05 | 5.20E-05 | 210.8716 | 195.9734 | 216.3725 | 111.6063 | 94.12087 | 108.5378 |
| 9954  | TRNAS-AG | 62.8243  | -0.98359 | 0.342255 | -2.87385 | 0.004055 | 0.01083  | 85.10756 | 74.99542 | 89.05362 | 42.41041 | 49.19955 | 36.17926 |
| 1375  | DHDDS    | 8023.043 | -0.98399 | 0.10207  | -9.64031 | 5.40E-22 | 1.04E-20 | 10691.57 | 9620.215 | 11656.28 | 5495.497 | 5589.496 | 5085.196 |
| 20138 | TRPV2    | 7.717916 | -0.98424 | 0.978582 | -1.00579 | 0.314519 | 0.415209 | 7.589209 | 10.94824 | 11.82743 | 2.232127 | 10.69555 | 3.014938 |
| 8799  | STK31    | 92.03222 | -0.98443 | 0.310061 | -3.17495 | 0.001499 | 0.004528 | 149.0738 | 106.7453 | 111.317  | 46.87467 | 74.86887 | 63.31371 |
| 1362  | ILF2     | 6454.782 | -0.98464 | 0.101712 | -9.68071 | 3.64E-22 | 7.11E-21 | 8041.851 | 9607.077 | 8076.745 | 4321.398 | 4404.429 | 4277.193 |
| 5252  | LOC10323 | 211.3559 | -0.98465 | 0.216301 | -4.55221 | 5.31E-06 | 2.69E-05 | 268.3328 | 314.7618 | 255.3334 | 149.5525 | 162.5724 | 117.5826 |
| 3373  | RDM1     | 363.1712 | -0.98486 | 0.165125 | -5.96437 | 2.46E-09 | 1.94E-08 | 486.2515 | 474.606  | 486.3162 | 279.0159 | 209.6328 | 243.205  |
| 15036 | LOC11962 | 34.05107 | -0.98541 | 0.539543 | -1.82637 | 0.067794 | 0.119866 | 57.46116 | 22.44388 | 57.04997 | 20.08914 | 17.11289 | 30.14938 |
| 14307 | CLEC2D   | 30.92589 | -0.98552 | 0.502861 | -1.95982 | 0.050017 | 0.092941 | 34.15144 | 39.96106 | 48.00546 | 31.24978 | 17.11289 | 15.07469 |
| 7717  | LOC10324 | 145.5253 | -0.98552 | 0.282508 | -3.48848 | 0.000486 | 0.001674 | 169.673  | 253.9991 | 153.7566 | 109.3742 | 106.9555 | 79.39338 |
| 3269  | LOC11962 | 738.982  | -0.98573 | 0.162241 | -6.07573 | 1.23E-09 | 1.00E-08 | 835.8972 | 1156.681 | 948.2819 | 537.9426 | 521.943  | 433.1462 |
| 5579  | LOC10323 | 358.4543 | -0.98613 | 0.22505  | -4.38181 | 1.18E-05 | 5.61E-05 | 368.0766 | 636.0925 | 422.3089 | 252.2303 | 260.9715 | 211.0457 |
| 17013 | LOC11962 | 16.34686 | -0.98621 | 0.661596 | -1.49065 | 0.136055 | 0.212603 | 29.81475 | 15.87494 | 19.48048 | 11.16063 | 10.69555 | 11.05477 |
| 2545  | CNTNAP1  | 534.6035 | -0.98659 | 0.139693 | -7.06256 | 1.63E-12 | 1.71E-11 | 691.1601 | 728.0577 | 711.0375 | 337.0512 | 393.5964 | 346.7179 |
| 14349 | LOC10324 | 37.03599 | -0.98673 | 0.505329 | -1.95265 | 0.050862 | 0.094233 | 67.21871 | 25.72836 | 54.96278 | 26.78552 | 21.39111 | 26.12947 |
| 5649  | LOC10321 | 154.399  | -0.98694 | 0.22705  | -4.3468  | 1.38E-05 | 6.50E-05 | 219.0029 | 210.7535 | 187.1517 | 102.6778 | 96.25998 | 110.5477 |
| 1336  | LOC10321 | 2962.116 | -0.98704 | 0.101193 | -9.75405 | 1.77E-22 | 3.53E-21 | 3974.577 | 4100.114 | 3746.513 | 1857.13  | 1948.73  | 2145.631 |
| 16300 | SUSD2    | 17.78125 | -0.98716 | 0.614426 | -1.60663 | 0.108135 | 0.176367 | 23.30971 | 23.53871 | 23.65487 | 11.16063 | 14.97377 | 10.04979 |
| 9331  | LOC10322 | 2461.148 | -0.98742 | 0.326573 | -3.02358 | 0.002498 | 0.007117 | 3970.783 | 1944.954 | 3900.966 | 1640.613 | 1550.855 | 1758.714 |
| 13326 | CDHR1    | 47.95918 | -0.98786 | 0.46098  | -2.14296 | 0.032116 | 0.064071 | 57.46116 | 60.76271 | 70.26887 | 42.41041 | 42.78221 | 14.06971 |
| 15748 | LOC11962 | 22.85681 | -0.98803 | 0.578467 | -1.70802 | 0.087633 | 0.147877 | 27.6464  | 39.41365 | 24.3506  | 20.08914 | 8.556443 | 17.08465 |
| 3246  | IER2     | 2185.203 | -0.98813 | 0.161917 | -6.10267 | 1.04E-09 | 8.54E-09 | 3369.067 | 2165.561 | 3187.145 | 1417.401 | 1336.944 | 1635.102 |
| 1505  | SLC12A2  | 2271.181 | -0.98814 | 0.106962 | -9.23827 | 2.51E-20 | 4.43E-19 | 2989.606 | 3277.902 | 2796.84  | 1470.972 | 1488.821 | 1602.942 |
| 15667 | LOXL4    | 22.36284 | -0.9882  | 0.573698 | -1.72251 | 0.084977 | 0.144177 | 31.44101 | 28.46541 | 28.52499 | 11.16063 | 23.53022 | 11.05477 |
| 13666 | SLIT1    | 56.90636 | -0.98854 | 0.476405 | -2.075   | 0.037986 | 0.073896 | 63.42411 | 71.16354 | 89.74935 | 35.71403 | 66.31243 | 15.07469 |
| 1289  | CTBP1    | 4342.85  | -0.98859 | 0.099979 | -9.88801 | 4.69E-23 | 9.68E-22 | 6023.122 | 5338.907 | 5970.767 | 2886.14  | 2733.783 | 3104.382 |
| 22974 | LOC10324 | 2.570977 | -0.98867 | 1.73927  | -0.56844 | 0.569735 | 0.659256 | 5.420864 | 0.547412 | 4.174388 | 0        | 4.278221 | 1.004979 |
| 15724 | PLAAT2   | 21.08372 | -0.98873 | 0.577038 | -1.71347 | 0.086627 | 0.146471 | 35.7777  | 24.63353 | 23.65487 | 13.39276 | 14.97377 | 14.06971 |
| 15927 | CPLX1    | 19.85967 | -0.98927 | 0.588896 | -1.67987 | 0.092982 | 0.155212 | 23.30971 | 27.37059 | 27.82925 | 15.62489 | 14.97377 | 10.04979 |
| 2168  | MRPL2    | 963.4116 | -0.98989 | 0.129173 | -7.66334 | 1.81E-14 | 2.22E-13 | 1323.233 | 1150.112 | 1375.461 | 647.3168 | 598.951  | 685.396  |
| 2496  | LOC10323 | 663.2342 | -0.99014 | 0.138664 | -7.14054 | 9.30E-13 | 9.90E-12 | 982.8026 | 820.5703 | 841.835  | 446.4254 | 455.6306 | 432.1412 |
| 17021 | LOC11962 | 19.93806 | -0.99051 | 0.66489  | -1.48974 | 0.136293 | 0.212795 | 40.65648 | 13.6853  | 25.04633 | 8.928508 | 19.252   | 12.05975 |
| 16129 | LOC10323 | 18.37576 | -0.99081 | 0.603981 | -1.64046 | 0.100909 | 0.166325 | 26.02015 | 24.08612 | 22.95914 | 11.16063 | 14.97377 | 11.05477 |
| 1570  | RPLP1    | 20222.05 | -0.99109 | 0.109505 | -9.05061 | 1.42E-19 | 2.41E-18 | 28118.56 | 23162.64 | 29442.66 | 14033.38 | 12706.32 | 13868.72 |
| 2762  | TRMT10A  | 577.5556 | -0.99115 | 0.146752 | -6.75389 | 1.44E-11 | 1.39E-10 | 783.8569 | 826.5918 | 697.8186 | 343.7476 | 404.2919 | 409.0266 |
| 2948  | TMEM129  | 1260.885 | -0.99154 | 0.152787 | -6.48965 | 8.60E-11 | 7.76E-10 | 1855.562 | 1363.603 | 1818.642 | 883.9223 | 723.0194 | 920.5612 |
| 1025  | TFAM     | 2579.984 | -0.99174 | 0.0910   |          |          |          |          |          |          |          |          |          |



|       |           |          |            |          |          |          |          |          |          |          |          |          |          |
|-------|-----------|----------|------------|----------|----------|----------|----------|----------|----------|----------|----------|----------|----------|
| 11646 | SOX11     | 78.01587 | -0.99314   | 0.400092 | -2.48228 | 0.013054 | 0.0298   | 89.44425 | 126.4521 | 92.53227 | 49.10679 | 83.42532 | 27.13445 |
| 2002  | CSNK2A2   | 1317.426 | -0.99336   | 0.124517 | -7.97767 | 1.49E-15 | 1.98E-14 | 1615.959 | 1976.704 | 1672.538 | 832.5834 | 879.1745 | 927.5961 |
| 2095  | TADA2B    | 846.9821 | -0.9946    | 0.127448 | -7.80398 | 6.00E-15 | 7.61E-14 | 1192.048 | 1078.949 | 1118.736 | 546.8711 | 526.2212 | 619.0674 |
| 16242 | LOC103221 | 20.60934 | -0.99473   | 0.614697 | -1.61824 | 0.10561  | 0.172863 | 20.0572  | 31.74989 | 29.91645 | 22.32127 | 8.556443 | 11.05477 |
| 4614  | SCARF2    | 534.2932 | -0.99496   | 0.201506 | -4.93761 | 7.91E-07 | 4.56E-06 | 783.8569 | 526.0628 | 826.5289 | 401.7829 | 286.6408 | 380.8872 |
| 16637 | LOC103234 | 18.78363 | -0.99511   | 0.641329 | -1.55164 | 0.120749 | 0.192949 | 21.68345 | 27.37059 | 26.43779 | 17.85702 | 4.278221 | 15.07469 |
| 3910  | LOC103224 | 266.8038 | -0.99559   | 0.183122 | -5.43673 | 5.43E-08 | 3.69E-07 | 327.4202 | 384.8305 | 354.1273 | 165.1774 | 190.3808 | 178.8863 |
| 2328  | TTK       | 1074.377 | -0.99584   | 0.135081 | -7.3722  | 1.68E-13 | 1.92E-12 | 1293.418 | 1631.835 | 1367.112 | 669.6381 | 780.7754 | 703.4856 |
| 1377  | SPDL1     | 2499.904 | -0.99595   | 0.103493 | -9.62333 | 6.37E-22 | 1.23E-20 | 3222.703 | 3626.603 | 3137.748 | 1662.935 | 1728.401 | 1621.032 |
| 1248  | LMNB2     | 8865.839 | -0.99621   | 0.099467 | -10.0155 | 1.30E-23 | 2.78E-22 | 11844.05 | 11686.15 | 11913.7  | 5850.405 | 5339.22  | 6561.511 |
| 1537  | OTUD3     | 1894.472 | -0.99621   | 0.108985 | -9.14082 | 6.20E-20 | 1.07E-18 | 2620.988 | 2651.115 | 2302.871 | 1256.687 | 1208.598 | 1326.573 |
| 1402  | LOC103221 | 7424.72  | -0.99701   | 0.10471  | -9.52162 | 1.70E-21 | 3.23E-20 | 10238.93 | 8765.158 | 10669.04 | 5178.535 | 5020.493 | 4676.169 |
| 1049  | RUVBL1    | 4732.462 | -0.99718   | 0.092629 | -10.7653 | 5.02E-27 | 1.27E-25 | 6231.825 | 6538.287 | 6150.265 | 3296.852 | 2928.443 | 3249.099 |
| 24363 | LOC119620 | 1.001035 | -0.99727   | 2.831006 | -0.35227 | 0.724637 | 0.790727 | 1.084173 | 0        | 2.782925 | 0        | 2.139111 | 0        |
| 2353  | RAVER2    | 1996.982 | -0.99748   | 0.135956 | -7.33681 | 2.19E-13 | 2.47E-12 | 2429.631 | 3186.484 | 2368.27  | 1241.063 | 1394.7   | 1361.747 |
| 4004  | LOC119620 | 1970.741 | -0.99772   | 0.185741 | -5.37157 | 7.81E-08 | 5.18E-07 | 2892.573 | 1760.476 | 3225.411 | 1433.026 | 1223.571 | 1289.389 |
| 18949 | LOC119621 | 9.934679 | -0.99793   | 0.835344 | -1.19463 | 0.232232 | 0.325816 | 11.9259  | 11.49565 | 16.00182 | 4.464254 | 10.69555 | 5.024897 |
| 1722  | ZNF516    | 896.7837 | -0.99851   | 0.115257 | -8.6634  | 4.58E-18 | 7.07E-17 | 1181.206 | 1233.866 | 1169.524 | 609.3707 | 596.8119 | 589.9229 |
| 2059  | SOC53     | 1151.561 | -0.99853   | 0.126843 | -7.87214 | 3.49E-15 | 4.50E-14 | 1603.491 | 1395.353 | 1612.705 | 749.9947 | 701.6283 | 846.1927 |
| 4275  | HIST1H2AI | 2595.706 | -0.99874   | 0.193063 | -5.17313 | 2.30E-07 | 1.43E-06 | 3908.985 | 2191.837 | 4278.052 | 1819.183 | 1721.984 | 1654.196 |
| 1152  | ZPR1      | 3890.417 | -0.99882   | 0.096885 | -10.3093 | 6.39E-25 | 1.48E-23 | 4935.154 | 5606.044 | 5020.398 | 2533.464 | 2554.098 | 2693.345 |
| 1313  | CEP85     | 3094.548 | -0.9991    | 0.101829 | -9.81157 | 1.00E-22 | 2.03E-21 | 4111.183 | 4288.972 | 3984.454 | 2022.307 | 1910.226 | 2250.149 |
| 2403  | EPHB4     | 1433.853 | -0.99973   | 0.137544 | -7.26845 | 3.64E-13 | 4.02E-12 | 2137.447 | 1631.287 | 1972.398 | 935.2612 | 868.4789 | 1058.243 |
| 16526 | LOC119620 | 17.65394 | -0.99987   | 0.636671 | -1.57047 | 0.116307 | 0.187109 | 16.80468 | 26.27577 | 27.82925 | 13.39276 | 8.556443 | 13.06473 |
| 15162 | LOC103240 | 26.79828 | -0.99995   | 0.554432 | -1.80355 | 0.071302 | 0.125021 | 45.53526 | 25.72836 | 35.4823  | 11.16063 | 27.80844 | 15.07469 |
| 16127 | LOC119621 | 21.59069 | -1.00004   | 0.609487 | -1.64079 | 0.100841 | 0.166234 | 24.39389 | 19.70683 | 41.74388 | 13.39276 | 19.252   | 11.05477 |
| 22613 | LOC103221 | 3.040676 | -1.00083   | 1.607043 | -0.62278 | 0.53343  | 0.6271   | 5.96295  | 4.379295 | 1.391463 | 2.232127 | 4.278221 | 0        |
| 3052  | L3MBTL3   | 677.6828 | -1.001     | 0.157963 | -6.3369  | 2.34E-10 | 2.04E-09 | 793.0724 | 1080.591 | 838.3563 | 426.3363 | 468.4652 | 459.2756 |
| 17559 | LOC103233 | 18.92427 | -1.00119   | 0.712231 | -1.40572 | 0.159809 | 0.241957 | 35.7777  | 9.306001 | 29.91645 | 13.39276 | 17.11289 | 8.039836 |
| 2685  | THAP10    | 630.1909 | -1.00188   | 0.146186 | -6.85346 | 7.21E-12 | 7.14E-11 | 762.1734 | 948.1173 | 808.4399 | 437.4969 | 429.9612 | 394.9569 |
| 12356 | LOC119621 | 62.74291 | -1.00201   | 0.429897 | -2.33082 | 0.019763 | 0.042522 | 98.65972 | 50.9093  | 103.664  | 42.41041 | 23.53022 | 57.28383 |
| 8881  | GALC      | 75.25301 | -1.0021    | 0.318292 | -3.14837 | 0.001642 | 0.004915 | 91.6126  | 101.8186 | 106.4469 | 62.49956 | 44.92132 | 44.2191  |
| 11240 | KHLH31    | 50.26175 | -1.00295   | 0.389827 | -2.5728  | 0.010088 | 0.02386  | 55.8349  | 73.35318 | 71.66033 | 26.78552 | 42.78221 | 31.15436 |
| 2894  | EHD3      | 481.8088 | -1.00297   | 0.152949 | -6.55758 | 5.47E-11 | 5.02E-10 | 627.736  | 714.3724 | 588.5887 | 308.0335 | 314.4493 | 337.6731 |
| 15097 | LOC103233 | 22.67641 | -1.00346   | 0.552372 | -1.81663 | 0.069274 | 0.121986 | 33.60935 | 26.82318 | 29.91645 | 13.39276 | 19.252   | 13.06473 |
| 18819 | LAMC3     | 10.9887  | -1.00364   | 0.825898 | -1.21521 | 0.224288 | 0.316862 | 10.84173 | 12.59047 | 20.17621 | 4.464254 | 12.83466 | 5.024897 |
| 24113 | DEFB136   | 1.001922 | -1.00406   | 2.584349 | -0.38852 | 0.697635 | 0.769122 | 0.542086 | 0.547412 | 2.782925 | 0        | 2.139111 | 0        |
| 24114 | LOC119621 | 1.001922 | -1.00406   | 2.584349 | -0.38852 | 0.697635 | 0.769122 | 0.542086 | 0.547412 | 2.782925 | 0        | 2.139111 | 0        |
| 24329 | LOC119621 | 1.008893 | -1.00437   | 2.809045 | -0.35755 | 0.72068  | 0.87516  | 1.084173 | 2.737059 | 0        | 2.232127 | 0        | 0        |
| 23313 | LOC119621 | 2.019145 | -1.00455   | 1.963271 | -0.51167 | 0.608882 | 0.694352 | 2.168345 | 2.189647 | 3.478657 | 0        | 4.278221 | 0        |
| 20055 | LOC103233 | 7.433626 | -1.0049    | 0.98544  | -1.01975 | 0.307849 | 0.408086 | 8.131296 | 5.474118 | 16.00182 | 6.696381 | 4.278221 | 4.019918 |
| 11084 | LOC119619 | 47.33474 | -1.00499   | 0.385166 | -2.60924 | 0.009074 | 0.021765 | 70.47123 | 59.12048 | 59.8329  | 33.4819  | 29.94755 | 31.15436 |
| 1298  | ARL6IP6   | 2058.052 | -1.00515   | 0.101888 | -9.86522 | 5.89E-23 | 1.21E-21 | 2701.758 | 2766.619 | 2765.532 | 1457.579 | 1392.561 | 1264.264 |
| 17537 | LOC103221 | 13.73204 | -1.00526   | 0.712821 | -1.41026 | 0.158462 | 0.240205 | 14.09425 | 19.15941 | 21.56767 | 6.696381 | 12.83466 | 8.039836 |
| 1436  | PDS5A     | 12045.12 | -1.00537   | 0.106722 | -9.42042 | 4.49E-21 | 8.32E-20 | 15194.14 | 18288.48 | 14762.03 | 7821.373 | 7779.945 | 8424.743 |
| 4249  | SDHAF3    | 316.5216 | -1.00575   | 0.193847 | -5.18838 | 2.12E-07 | 1.33E-06 | 447.2213 | 339.9427 | 481.4461 | 216.5163 | 198.9373 | 215.0656 |
| 7695  | NES       | 131.3945 | -1.0061    | 0.287822 | -3.49556 | 0.000473 | 0.001634 | 162.0838 | 189.4045 | 171.1499 | 80.35657 | 124.0684 | 61.30375 |
| 10965 | RNF43     | 71.20661 | -1.00662   | 0.381841 | -2.63623 | 0.008383 | 0.020326 | 89.98634 | 89.77554 | 102.9682 | 78.12444 | 34.22577 | 32.15934 |
| 4216  | MSX1      | 248.5065 | -1.00663   | 0.193303 | -5.20751 | 1.91E-07 | 1.21E-06 | 312.7838 | 369.503  | 311.6877 | 185.2665 | 154.016  | 157.7818 |
| 3430  | LOC119621 | 5205.896 | -1.00727   | 0.170216 | -5.9176  | 3.27E-09 | 2.53E-08 | 8371.982 | 4886.745 | 7604.344 | 3390.601 | 3114.545 | 3867.161 |
| 19100 | LOC103220 | 9.392822 | -1.00768   | 0.861407 | -1.16981 | 0.242078 | 0.336944 | 13.01007 | 10.94824 | 13.2189  | 4.464254 | 10.69555 | 4.019918 |
| 6793  | LOC103221 | 193.7878 | -1.00838   | 0.264004 | -3.81955 | 0.000134 | 0.000523 | 343.1407 | 182.2881 | 250.4633 | 129.4634 | 134.764  | 122.6075 |
| 1184  | RP511     | 50448.06 | -1.00934   | 0.098868 | -10.2089 | 1.81E-24 | 4.06E-23 | 72627.11 | 59249.67 | 70349.57 | 33611.37 | 33680.3  | 33170.35 |
| 13161 | TRNAG-CC  | 38.23027 | -1.00984   | 0.463548 | -2.17851 | 0.029368 | 0.059324 | 43.909   | 62.95236 | 45.22254 | 37.94616 | 19.252   | 20.09959 |
| 2848  | CEP95     | 1113.166 | -1.01051   | 0.152722 | -6.61669 | 3.67E-11 | 3.43E-10 | 1359.011 | 1780.731 | 1322.585 | 660.7096 | 836.3923 | 719.5653 |
| 1637  | LSM5      | 1713.943 | -1.01072   | 0.113812 | -8.88033 | 6.67E-19 | 1.08E-17 | 2302.783 | 2061.005 | 2508.807 | 1127.224 | 1157.259 | 1126.582 |
| 1527  | LAP3      | 2909.815 | -1.01107   | 0.110383 | -9.15971 | 5.20E-20 | 9.06E-19 | 3981.082 | 4107.778 | 3588.582 | 1879.451 | 1775.462 | 2126.537 |
| 16518 | LOC119621 | 24.26449 | -1.01111   | 0.643331 | -1.57168 | 0.116025 | 0.186732 | 27.10432 | 54.19377 | 15.30609 | 13.39276 | 23.53022 | 12.05975 |
| 2884  | SLAIN1    | 569.9404 | -1.01117   | 0.153914 | -6.56972 | 5.04E-11 | 4.65E-10 | 692.2443 | 882.4278 | 712.4289 | 370.5331 | 370.0661 | 391.942  |
| 1994  | NEO1      | 7258.157 | -1.01122   | 0.126288 | -8.00728 | 1.17E-15 | 1.56E-14 | 8788.846 | 11645.64 | 8677.162 | 4633.896 | 4691.07  | 5112.331 |
| 11358 | LOC119619 | 47.47525 | -1.01144   | 0.397206 | -2.54639 | 0.010884 | 0.02548  | 70.47123 | 56.38342 | 64.00729 | 22.32127 | 38.50399 | 33.16432 |
| 16150 | LOC119621 | 21.42247 | -1.01158   | 0.617811 | -1.63736 | 0.101554 | 0.167172 | 23.30971 | 30.65506 | 30.61218 | 13.39276 | 23.53022 | 7.034856 |
| 13067 | KCNH4     | 39.6705  | -1.0119    | 0.461239 | -2.19387 | 0.028245 | 0.057472 | 54.20864 | 39.41365 | 64.70302 | 20.08914 | 38.50399 | 21.10457 |
| 2162  | BBS10     | 639.8147 | -1.01192   | 0.131999 | -7.66617 | 1.77E-14 | 2.18E-13 | 904.7422 | 821.1177 | 839.052  | 410.7114 | 449.2132 | 414.0515 |
| 12249 | PNMA3     | 51.67739 | -1.01265   | 0.429788 | -2.35615 | 0.018465 | 0.040077 | 58.54533 | 66.78424 | 79.31338 | 42.41041 | 44.92132 | 18.08963 |
| 9043  | KCNJ1     | 72.42234 | -1.01341   | 0.326828 | -3.10074 | 0.00193  | 0.005675 | 82.93921 | 103.4608 | 102.9682 | 58.0353  | 44.92132 | 42.20914 |
| 13342 | LOC103220 | 35.82067 | -1.01364   | 0.473832 | -2.13923 | 0.032417 | 0.064593 | 41.74065 | 49.26706 | 50.78839 | 31.24978 | 27.80844 | 14.06971 |
| 15801 | SLC6A3    | 24.23745 | -1.01382   | 0.59593  | -1.70124 | 0.088898 | 0.14957  | 38.48813 | 22.44388 | 34.78657 | 24.5534  | 17.11289 | 8.039836 |
| 11239 | DLX4      | 50.5221  | -1.01422   | 0.394199 | -2.57286 | 0.010086 | 0.023858 | 54.75072 | 83.75401 | 63.31155 | 37.94616 | 34.22577 | 29.1444  |
| 2854  | LURAP1L   | 394.2523 | -1.01438   | 0.153536 | -6.60677 | 3.93E-11 | 3.66E-10 | 519.3187 | 540.8429 | 519.0156 | 279.0159 | 263.1106 | 244.21   |
| 1662  | SGTB      | 2888.407 | -1.01444</ |          |          |          |          |          |          |          |          |          |          |



|       |           |          |          |          |          |          |          |          |          |          |          |          |          |
|-------|-----------|----------|----------|----------|----------|----------|----------|----------|----------|----------|----------|----------|----------|
| 12682 | LOC103236 | 36.6843  | -1.01549 | 0.448645 | -2.26345 | 0.023608 | 0.049489 | 46.61943 | 58.02565 | 43.83108 | 20.08914 | 21.39111 | 30.14938 |
| 13558 | LOC119627 | 44.87172 | -1.01582 | 0.484296 | -2.09752 | 0.035948 | 0.070488 | 71.5554  | 35.58177 | 74.44326 | 33.4819  | 14.97377 | 39.1942  |
| 1585  | PIGG      | 1496.016 | -1.01597 | 0.112783 | -9.00812 | 2.10E-19 | 3.52E-18 | 2121.184 | 1903.898 | 1987.705 | 915.1721 | 981.8518 | 1066.283 |
| 1370  | NUP210    | 4163.795 | -1.01602 | 0.105309 | -9.64802 | 5.01E-22 | 9.72E-21 | 5748.826 | 5296.757 | 5681.342 | 2720.963 | 2487.786 | 3047.098 |
| 9860  | LOC119626 | 63.25046 | -1.01611 | 0.351497 | -2.89079 | 0.003843 | 0.010361 | 76.43418 | 73.35318 | 104.3597 | 44.64254 | 38.50399 | 42.20914 |
| 4402  | SNRPB     | 6991.597 | -1.0164  | 0.200077 | -5.08005 | 3.77E-07 | 2.28E-06 | 11419.59 | 5604.95  | 11050.3  | 4486.575 | 4355.229 | 5032.937 |
| 11982 | LOC119628 | 42.88324 | -1.0184  | 0.422721 | -2.40915 | 0.01599  | 0.035471 | 71.5554  | 45.43518 | 55.65851 | 24.5534  | 29.94755 | 30.14938 |
| 7692  | BAAT      | 88.45688 | -1.01895 | 0.291448 | -3.49617 | 0.000472 | 0.001631 | 119.259  | 127.547  | 107.1426 | 62.49956 | 62.03421 | 52.25893 |
| 3872  | LEPR      | 286.2187 | -1.01902 | 0.18616  | -5.47391 | 4.40E-08 | 3.02E-07 | 429.8745 | 385.9253 | 335.3425 | 187.4987 | 179.6853 | 198.9859 |
| 1733  | TRMT11    | 820.1872 | -1.01904 | 0.118075 | -8.63039 | 6.11E-18 | 9.38E-17 | 1072.789 | 1132.048 | 1089.515 | 544.639  | 545.4732 | 536.659  |
| 2624  | CPSF4     | 3439.925 | -1.01913 | 0.146781 | -6.94322 | 3.83E-12 | 3.88E-11 | 5179.093 | 3772.215 | 4876.381 | 2296.859 | 1908.087 | 2606.917 |
| 1440  | HIST2H2AC | 9597.934 | -1.0192  | 0.108358 | -9.40583 | 5.16E-21 | 9.53E-20 | 11723.16 | 13620.15 | 13207.76 | 6682.988 | 6746.755 | 5606.78  |
| 23758 | LOC119627 | 1.227608 | -1.01953 | 2.296778 | -0.4439  | 0.657117 | 0.735327 | 1.626259 | 1.642235 | 2.087194 | 0        | 0        | 2.009959 |
| 15300 | LOC119625 | 20.70993 | -1.01956 | 0.57298  | -1.77939 | 0.075175 | 0.130623 | 26.56223 | 26.82318 | 29.22072 | 15.62489 | 14.97377 | 11.05477 |
| 21617 | LOC119627 | 4.329248 | -1.01957 | 1.29348  | -0.78824 | 0.430558 | 0.529508 | 8.131296 | 3.284471 | 6.261582 | 0        | 4.278221 | 4.019918 |
| 20939 | LOC103215 | 4.945479 | -1.01961 | 1.150012 | -0.88661 | 0.375291 | 0.47673  | 7.047123 | 7.663765 | 5.565851 | 2.232127 | 2.139111 | 5.024897 |
| 6655  | LOC103245 | 122.5089 | -1.01965 | 0.263118 | -3.87525 | 0.000107 | 0.000425 | 160.9997 | 180.6459 | 150.9737 | 95.98146 | 62.03421 | 84.41828 |
| 22072 | LOC119627 | 3.703886 | -1.01982 | 1.428889 | -0.71372 | 0.475402 | 0.572661 | 5.420864 | 4.926706 | 4.174388 | 6.696381 | 0        | 1.004979 |
| 17843 | LOC119626 | 13.90824 | -1.01995 | 0.74474  | -1.36954 | 0.17083  | 0.254527 | 26.56223 | 10.94824 | 18.08902 | 13.39276 | 6.417332 | 8.039836 |
| 1943  | LOC103224 | 1066.603 | -1.02005 | 0.125808 | -8.10797 | 5.15E-16 | 7.04E-15 | 1382.32  | 1355.392 | 1542.436 | 716.5128 | 765.8016 | 637.157  |
| 9599  | LOC103247 | 1842.036 | -1.0204  | 0.344563 | -2.96144 | 0.003062 | 0.00848  | 2954.913 | 1426.008 | 3022.257 | 1290.169 | 1101.642 | 1257.229 |
| 19664 | FAR2      | 7.923063 | -1.02087 | 0.948716 | -1.07605 | 0.281904 | 0.381124 | 7.047123 | 13.13788 | 11.1317  | 8.928508 | 4.278221 | 3.014938 |
| 5086  | LOC119626 | 186.4174 | -1.02091 | 0.220024 | -4.63999 | 3.48E-06 | 1.82E-05 | 261.2856 | 217.8699 | 268.5523 | 142.8561 | 113.3729 | 114.5677 |
| 24495 | LOC119618 | 0.760798 | -1.021   | 3.078553 | -0.33165 | 0.740154 | 0.803307 | 2.168345 | 0        | 1.391463 | 0        | 0        | 1.004979 |
| 1757  | PSD3      | 2068.237 | -1.02113 | 0.119049 | -8.57733 | 9.71E-18 | 1.47E-16 | 2742.415 | 2969.709 | 2609.688 | 1350.437 | 1208.598 | 1528.574 |
| 10968 | LOC119628 | 121.8718 | -1.02188 | 0.387672 | -2.63594 | 0.00839  | 0.020337 | 103.5385 | 276.9904 | 108.5341 | 98.21359 | 70.59065 | 73.3635  |
| 4623  | FLACC1    | 203.9832 | -1.02208 | 0.207199 | -4.93284 | 8.10E-07 | 4.66E-06 | 272.1274 | 289.5808 | 256.0291 | 158.481  | 124.0684 | 123.6125 |
| 1840  | NSA2      | 10897.77 | -1.02294 | 0.122671 | -8.33892 | 7.50E-17 | 1.08E-15 | 12895.69 | 17455.87 | 13466.58 | 7267.805 | 7420.575 | 6880.089 |
| 1764  | NFASC     | 1547.398 | -1.02305 | 0.119516 | -8.55994 | 1.13E-17 | 1.70E-16 | 1939.043 | 2336.354 | 1948.744 | 1033.475 | 977.5736 | 1049.199 |
| 3103  | LOC103236 | 45579.96 | -1.02368 | 0.163134 | -6.27509 | 3.49E-10 | 2.99E-09 | 66561.7  | 42719.47 | 74030.69 | 30868.08 | 31592.53 | 27707.28 |
| 9836  | LOC119627 | 60.07766 | -1.0247  | 0.353585 | -2.89801 | 0.003755 | 0.01015  | 80.77087 | 88.68071 | 73.74753 | 37.94616 | 32.08666 | 47.23404 |
| 3115  | LOC119615 | 500.3662 | -1.02481 | 0.163617 | -6.26347 | 3.77E-10 | 3.21E-09 | 635.8673 | 788.273  | 588.5887 | 334.819  | 323.0057 | 331.6432 |
| 1622  | PFAS      | 4245.036 | -1.02516 | 0.11497  | -8.91677 | 4.80E-19 | 7.87E-18 | 6085.462 | 5251.869 | 5750.916 | 2776.766 | 2470.673 | 3134.531 |
| 10766 | AGT       | 53.74479 | -1.0252  | 0.383101 | -2.76706 | 0.007449 | 0.018395 | 83.4813  | 60.76271 | 70.26887 | 40.17829 | 40.6431  | 27.13445 |
| 10771 | KCNK13    | 61.15142 | -1.02565 | 0.383486 | -2.67453 | 0.007483 | 0.01847  | 76.97626 | 91.41777 | 76.53045 | 26.78552 | 62.03421 | 33.16432 |
| 1054  | MRPL27    | 2334.423 | -1.0263  | 0.095672 | -10.7273 | 7.58E-27 | 1.91E-25 | 3230.835 | 3002.554 | 3158.62  | 1595.971 | 1508.073 | 1510.484 |
| 1568  | POLA1     | 4862.914 | -1.02641 | 0.113363 | -9.05414 | 1.38E-19 | 2.33E-18 | 6156.475 | 7487.499 | 5929.023 | 3049.085 | 3227.918 | 3327.487 |
| 1388  | MAEA      | 1672.244 | -1.0265  | 0.107151 | -9.57998 | 9.71E-22 | 1.86E-20 | 2304.951 | 2179.246 | 2253.474 | 1026.778 | 1078.112 | 1190.901 |
| 743   | PWP1      | 5325.74  | -1.02675 | 0.081991 | -12.5227 | 5.61E-36 | 2.01E-34 | 7204.328 | 7078.035 | 7148.64  | 3558.01  | 3527.393 | 3438.035 |
| 2069  | HS6ST1    | 1825.465 | -1.02679 | 0.130777 | -7.8515  | 4.11E-15 | 5.28E-14 | 2635.624 | 2249.863 | 2467.759 | 1267.848 | 1001.104 | 1330.593 |
| 5152  | ZNF548    | 156.208  | -1.02711 | 0.223197 | -4.60179 | 4.19E-06 | 2.16E-05 | 209.7874 | 221.7018 | 198.2834 | 102.6778 | 96.25998 | 108.5378 |
| 11797 | LOC119627 | 59.64508 | -1.02719 | 0.419333 | -2.44959 | 0.014302 | 0.03223  | 87.27591 | 63.49977 | 86.27069 | 55.80317 | 44.92132 | 20.09959 |
| 15609 | LOC103224 | 19.7978  | -1.02771 | 0.594801 | -1.72783 | 0.084019 | 0.143091 | 21.14137 | 26.82318 | 31.30791 | 15.62489 | 12.83466 | 11.05477 |
| 3077  | LIPT2     | 340.8014 | -1.02775 | 0.16303  | -6.30405 | 2.90E-10 | 2.51E-09 | 459.6892 | 430.2657 | 483.5333 | 220.9806 | 218.1893 | 232.1503 |
| 13062 | LOC103227 | 44.22652 | -1.02809 | 0.468574 | -2.19409 | 0.028229 | 0.057454 | 72.09749 | 31.74989 | 74.44326 | 31.24978 | 25.66933 | 30.14938 |
| 10414 | FAM189A2  | 52.48321 | -1.02861 | 0.372236 | -2.76332 | 0.005722 | 0.014606 | 66.67662 | 76.09024 | 67.48594 | 42.41041 | 32.08666 | 30.14938 |
| 1861  | AGTPBP1   | 1085.068 | -1.02876 | 0.124305 | -8.27611 | 1.27E-16 | 1.82E-15 | 1431.108 | 1553.007 | 1381.723 | 665.1738 | 800.0274 | 679.3661 |
| 1308  | CHEK1     | 1763.085 | -1.02893 | 0.104713 | -9.82615 | 8.69E-23 | 1.77E-21 | 2316.877 | 2431.056 | 2355.746 | 1060.26  | 1208.598 | 1205.975 |
| 10307 | LOC103246 | 59.29278 | -1.02925 | 0.369296 | -2.78705 | 0.005319 | 0.013721 | 70.47123 | 96.34448 | 70.26887 | 46.87467 | 40.6431  | 31.15436 |
| 1910  | LOC103227 | 7347.865 | -1.02979 | 0.125911 | -8.17871 | 2.87E-16 | 3.99E-15 | 10564.18 | 7976.885 | 11052.39 | 4968.715 | 4691.07  | 4833.951 |
| 1103  | TXLNA     | 5393.387 | -1.02986 | 0.097978 | -10.5112 | 7.67E-26 | 1.85E-24 | 7320.334 | 7275.65  | 7137.508 | 3412.922 | 3298.509 | 3915.4   |
| 15460 | HSF5      | 22.21093 | -1.03038 | 0.588413 | -1.75112 | 0.079926 | 0.13746  | 27.6464  | 33.93953 | 26.43779 | 20.08914 | 17.11289 | 8.039836 |
| 1880  | SH3BP4    | 3065.592 | -1.03074 | 0.125211 | -8.232   | 1.84E-16 | 2.60E-15 | 3821.167 | 4759.198 | 3775.734 | 1915.165 | 1895.252 | 2227.035 |
| 20369 | TRNAE-UU  | 5.826476 | -1.031   | 1.06685  | -0.96639 | 0.333848 | 0.435728 | 8.673382 | 7.663765 | 6.957314 | 2.232127 | 6.417332 | 3.014938 |
| 4311  | ZIC2      | 457.9747 | -1.03189 | 0.200477 | -5.14715 | 2.64E-07 | 1.63E-06 | 523.1133 | 776.7774 | 548.2363 | 319.1942 | 243.8586 | 336.6681 |
| 2131  | DCAKD     | 720.6428 | -1.03218 | 0.133509 | -7.73114 | 1.07E-14 | 1.33E-13 | 981.1763 | 1030.776 | 896.102  | 441.9611 | 466.3261 | 507.5146 |
| 3531  | LOC103224 | 640.7036 | -1.03228 | 0.177197 | -5.82562 | 5.69E-09 | 4.28E-08 | 683.5709 | 1035.703 | 859.2282 | 470.9788 | 412.8484 | 381.8922 |
| 16377 | PATE2     | 17.4763  | -1.03248 | 0.648536 | -1.59202 | 0.111381 | 0.180806 | 18.43094 | 27.37059 | 23.65487 | 13.39276 | 14.97377 | 7.034856 |
| 2668  | RP58      | 52931.88 | -1.0326  | 0.150168 | -6.87633 | 6.14E-12 | 6.12E-11 | 78478.39 | 51656.52 | 83180.25 | 35410.46 | 35312.44 | 33553.25 |
| 3414  | LOC103236 | 343.1791 | -1.0327  | 0.174039 | -5.93372 | 2.96E-09 | 2.31E-08 | 475.9518 | 414.3907 | 495.3607 | 234.3733 | 196.7982 | 242.2001 |
| 12587 | LOC103227 | 45.0562  | -1.03314 | 0.451866 | -2.28638 | 0.022232 | 0.046956 | 41.19856 | 87.58589 | 52.17985 | 29.01765 | 34.22577 | 26.12947 |
| 1806  | COL11A1   | 1747.879 | -1.03319 | 0.122502 | -8.43408 | 3.34E-17 | 4.91E-16 | 2211.17  | 2695.456 | 2140.07  | 1124.992 | 1133.729 | 1181.856 |
| 8727  | LOC103236 | 98.35292 | -1.0333  | 0.323503 | -3.1941  | 0.001403 | 0.004273 | 103.5385 | 180.6459 | 111.317  | 64.73168 | 70.59065 | 59.29379 |
| 1376  | CCDC90B   | 1302.919 | -1.03335 | 0.107264 | -9.63364 | 5.77E-22 | 1.11E-20 | 1769.912 | 1696.429 | 1781.072 | 899.5472 | 853.5052 | 817.0483 |
| 2173  | CCNB1     | 6470.914 | -1.03349 | 0.134963 | -7.65758 | 1.89E-14 | 2.32E-13 | 9824.773 | 6832.794 | 9428.552 | 4254.434 | 4042.919 | 4442.009 |
| 1794  | KIF4A     | 2187.395 | -1.03381 | 0.122047 | -8.4706  | 2.44E-17 | 3.62E-16 | 2789.034 | 3275.165 | 2762.054 | 1341.508 | 1347.64  | 1608.972 |
| 9011  | LOC119615 | 71.72704 | -1.03392 | 0.332204 | -3.11231 | 0.001856 | 0.005477 | 117.0907 | 81.56436 | 90.44508 | 49.10679 | 44.92132 | 47.23404 |
| 1640  | LOC103227 | 905.0027 | -1.03422 | 0.116489 | -8.87826 | 6.79E-19 | 1.10E-17 | 1241.92  | 1215.802 | 1191.788 | 616.067  | 560.447  | 603.9927 |
| 3360  | SLC16A13  | 370.6026 | -1.03423 | 0.17299  | -5.97853 | 2.25E-09 | 1.78E-08 | 440.7162 | 557.8126 | 498.8394 | 229.9091 | 231.024  | 265.3146 |
| 7361  | LOC119625 | 105.8403 | -1.03436 | 0.286297 | -3.61289 | 0.000303 | 0.001093 | 119.259  | 165.8658 | 141.2335 | 82.5887  | 57.75599 | 68.3386  |
| 20972 | NIPAL2    | 6.2505   | -1.03457 | 1.171972 | -0.88276 | 0.377365 | 0.478    |          |          |          |          |          |          |



|       |           |          |          |          |          |          |          |          |          |          |          |          |          |
|-------|-----------|----------|----------|----------|----------|----------|----------|----------|----------|----------|----------|----------|----------|
| 3895  | LOC103214 | 398.0961 | -1.03586 | 0.190105 | -5.44887 | 5.07E-08 | 3.46E-07 | 589.2479 | 416.033  | 602.5034 | 249.9982 | 252.4151 | 278.3793 |
| 16564 | LOC119623 | 22.319   | -1.03612 | 0.662917 | -1.56297 | 0.11806  | 0.189484 | 31.44101 | 29.56024 | 27.13352 | 26.78552 | 14.97377 | 4.019918 |
| 7636  | LOC119618 | 101.7453 | -1.03645 | 0.294975 | -3.5137  | 0.000442 | 0.001539 | 142.0266 | 146.159  | 120.3615 | 55.80317 | 89.84265 | 56.27885 |
| 5895  | TRNAP-AG  | 306.1812 | -1.03676 | 0.24585  | -4.21707 | 2.48E-05 | 0.000112 | 471.6151 | 264.3999 | 500.9266 | 185.2665 | 196.7982 | 218.0805 |
| 9020  | LOC103226 | 106.8394 | -1.03687 | 0.333412 | -3.10988 | 0.001872 | 0.005516 | 163.7101 | 112.2194 | 154.4524 | 102.6778 | 40.6431  | 67.33362 |
| 9985  | LOC119620 | 67.80915 | -1.03691 | 0.362017 | -2.86427 | 0.00418  | 0.011128 | 110.0435 | 78.27989 | 83.48776 | 62.49956 | 36.36488 | 36.17926 |
| 15334 | DUSP15    | 29.17382 | -1.03726 | 0.585035 | -1.77299 | 0.07623  | 0.132162 | 46.07734 | 27.918   | 41.74388 | 22.32127 | 29.94755 | 7.034856 |
| 3487  | LOC103230 | 276.2076 | -1.03733 | 0.176719 | -5.86993 | 4.36E-09 | 3.32E-08 | 358.3191 | 381.546  | 377.0864 | 176.338  | 168.9897 | 194.966  |
| 11778 | LOC103246 | 74.58584 | -1.03755 | 0.422899 | -2.45342 | 0.01415  | 0.03194  | 140.9425 | 46.53    | 113.4042 | 51.33892 | 47.06043 | 48.23901 |
| 12389 | LOC103215 | 38.74572 | -1.03798 | 0.446549 | -2.32446 | 0.020101 | 0.043134 | 62.33993 | 41.6033  | 53.57132 | 24.5534  | 19.252   | 31.15436 |
| 2250  | RDH10     | 722.9134 | -1.03818 | 0.138249 | -7.50946 | 5.94E-14 | 7.02E-13 | 923.7152 | 1055.41  | 942.716  | 477.6752 | 421.4048 | 516.5594 |
| 3728  | LOC103235 | 256.1767 | -1.03848 | 0.184992 | -5.61362 | 1.98E-08 | 1.41E-07 | 325.2518 | 354.7229 | 354.823  | 180.8023 | 147.5986 | 173.8614 |
| 1470  | RPTOR     | 2982.593 | -1.0394  | 0.11145  | -9.32615 | 1.10E-20 | 1.99E-19 | 4026.075 | 3852.137 | 4170.91  | 1919.629 | 1736.958 | 2189.85  |
| 12935 | LOC103227 | 42.76934 | -1.03974 | 0.469288 | -2.21556 | 0.026721 | 0.05492  | 67.7608  | 31.74989 | 73.05179 | 31.24978 | 25.66933 | 27.13445 |
| 1533  | CTH       | 4450.16  | -1.04005 | 0.113733 | -9.14464 | 5.98E-20 | 1.04E-18 | 5426.827 | 6833.889 | 5708.476 | 2877.212 | 2772.287 | 3082.272 |
| 3805  | MAJIN     | 256.7392 | -1.04008 | 0.187958 | -5.53355 | 3.14E-08 | 2.19E-07 | 332.2989 | 353.628  | 353.4315 | 140.624  | 177.5462 | 182.9063 |
| 11502 | LOC103228 | 56.62884 | -1.04022 | 0.413507 | -2.5156  | 0.011883 | 0.027466 | 61.25576 | 60.2153  | 107.1426 | 26.78552 | 49.19955 | 35.17428 |
| 10915 | LOC119618 | 53.71793 | -1.04028 | 0.392838 | -2.64811 | 0.008094 | 0.019715 | 78.60252 | 53.64636 | 85.57496 | 26.78552 | 38.50399 | 39.1942  |
| 1531  | KIF18A    | 1798.369 | -1.04034 | 0.113734 | -9.14721 | 5.84E-20 | 1.01E-18 | 2240.443 | 2689.982 | 2328.613 | 1220.973 | 1144.424 | 1165.776 |
| 2043  | ZNF362    | 1074.524 | -1.04078 | 0.13191  | -7.89013 | 3.02E-15 | 3.93E-14 | 1326.485 | 1635.119 | 1378.244 | 738.834  | 643.8723 | 724.5902 |
| 3627  | LOC103226 | 470.9218 | -1.04086 | 0.182181 | -5.71331 | 1.11E-08 | 8.12E-08 | 526.908  | 723.131  | 647.0302 | 366.0688 | 293.0582 | 269.3345 |
| 10347 | LOC103227 | 57.38431 | -1.04098 | 0.374797 | -2.77746 | 0.005479 | 0.014076 | 70.47123 | 91.41777 | 71.66033 | 35.71403 | 27.80844 | 47.23404 |
| 1744  | ARSD      | 1602.897 | -1.04116 | 0.12096  | -8.60746 | 7.47E-18 | 1.14E-16 | 2179.729 | 2212.091 | 2087.194 | 1091.51  | 894.1483 | 1152.711 |
| 15395 | TRNAA-UG  | 35.35706 | -1.04117 | 0.591405 | -1.7605  | 0.078322 | 0.135252 | 74.26583 | 16.42235 | 52.87558 | 22.32127 | 17.11289 | 29.1444  |
| 806   | KPNA2     | 10770.75 | -1.04185 | 0.086504 | -12.044  | 2.09E-33 | 6.88E-32 | 14630.37 | 14629.58 | 14246.49 | 6997.718 | 6631.243 | 7489.107 |
| 1939  | NFXL1     | 950.2303 | -1.04188 | 0.128331 | -8.11869 | 4.71E-16 | 6.46E-15 | 1276.071 | 1312.146 | 1254.404 | 651.7811 | 532.6386 | 674.3412 |
| 2252  | SH3D21    | 615.8585 | -1.04193 | 0.138823 | -7.50546 | 6.12E-14 | 7.23E-13 | 849.9914 | 853.9624 | 788.2636 | 361.6046 | 402.1528 | 439.176  |
| 1288  | DNA2      | 1478.708 | -1.04209 | 0.105322 | -9.8943  | 4.41E-23 | 9.10E-22 | 2067.517 | 2019.95  | 1881.953 | 968.7431 | 990.4082 | 943.6757 |
| 18215 | LOC103247 | 14.03611 | -1.04269 | 0.802685 | -1.29901 | 0.193942 | 0.28306  | 23.8518  | 8.758589 | 24.3506  | 2.232127 | 14.97377 | 10.04979 |
| 9336  | LOC103240 | 67.02819 | -1.04281 | 0.345042 | -3.02227 | 0.002509 | 0.007143 | 100.8281 | 75.54283 | 94.61947 | 33.4819  | 53.47777 | 44.2191  |
| 1509  | ETV5      | 2839.107 | -1.04284 | 0.11299  | -9.22947 | 2.72E-20 | 4.79E-19 | 3700.824 | 4238.61  | 3535.707 | 1796.862 | 1747.653 | 2014.984 |
| 1426  | CDC45     | 1623.901 | -1.04289 | 0.110405 | -9.44601 | 3.52E-21 | 6.56E-20 | 2195.992 | 2340.733 | 2026.665 | 1053.564 | 1013.938 | 1112.512 |
| 27024 | LOC119624 | 0.322258 | -1.04293 | 3.988461 | -0.26149 | 0.793718 | NA       | 0.542086 | 0        | 1.391463 | 0        | 0        | 0        |
| 28989 | TRNAV-CA  | 0.322258 | -1.04293 | 3.988461 | -0.26149 | 0.793718 | NA       | 0.542086 | 0        | 1.391463 | 0        | 0        | 0        |
| 8258  | LOC103234 | 84.72985 | -1.04293 | 0.313486 | -3.32689 | 0.000878 | 0.002827 | 107.3331 | 117.1461 | 114.7957 | 64.73168 | 64.17332 | 40.19918 |
| 2181  | TULP4     | 2970.97  | -1.04296 | 0.136369 | -7.64805 | 2.04E-14 | 2.49E-13 | 3593.491 | 4896.051 | 3512.748 | 1908.469 | 1925.2   | 1989.859 |
| 2705  | KRT10     | 542.6352 | -1.04322 | 0.152784 | -6.82807 | 8.61E-12 | 8.46E-11 | 672.1871 | 824.9496 | 698.5143 | 339.2833 | 337.9795 | 382.8972 |
| 3679  | LOC119628 | 267.7837 | -1.04324 | 0.183977 | -5.67048 | 1.42E-08 | 1.03E-07 | 362.1137 | 373.8823 | 346.4742 | 149.5525 | 196.7982 | 177.8814 |
| 598   | EEF1G     | 17153.59 | -1.04354 | 0.076617 | -13.6201 | 3.04E-42 | 1.35E-40 | 99086.88 | 93662.16 | 97140.8  | 47200.56 | 45828.31 | 47602.86 |
| 2329  | TGFβ2     | 2157.601 | -1.04495 | 0.141798 | -7.36931 | 1.72E-13 | 1.96E-12 | 2624.24  | 3578.978 | 2515.765 | 1417.401 | 1403.257 | 1405.966 |
| 18265 | LOC119624 | 14.07084 | -1.0454  | 0.810209 | -1.29029 | 0.196951 | 0.28665  | 24.39389 | 8.211177 | 23.65487 | 17.85702 | 4.278221 | 6.029877 |
| 1653  | TRA2A     | 2348.116 | -1.04548 | 0.11825  | -8.84123 | 9.47E-19 | 1.52E-17 | 3113.744 | 3586.095 | 2788.491 | 1575.882 | 1523.047 | 1501.439 |
| 9093  | TRABD2A   | 67.45859 | -1.04603 | 0.339043 | -3.08524 | 0.002034 | 0.005946 | 78.06044 | 98.53413 | 94.61947 | 53.57105 | 42.78221 | 37.18424 |
| 27296 | LOC119625 | 0.323146 | -1.04667 | 3.988252 | -0.26244 | 0.792984 | NA       | 0        | 0.547412 | 1.391463 | 0        | 0        | 0        |
| 27831 | LOC103214 | 0.323146 | -1.04667 | 3.988252 | -0.26244 | 0.792984 | NA       | 0        | 0.547412 | 1.391463 | 0        | 0        | 0        |
| 27975 | LOC119628 | 0.323146 | -1.04667 | 3.988252 | -0.26244 | 0.792984 | NA       | 0        | 0.547412 | 1.391463 | 0        | 0        | 0        |
| 28103 | LOC103247 | 0.323146 | -1.04667 | 3.988252 | -0.26244 | 0.792984 | NA       | 0        | 0.547412 | 1.391463 | 0        | 0        | 0        |
| 28186 | LOC119618 | 0.323146 | -1.04667 | 3.988252 | -0.26244 | 0.792984 | NA       | 0        | 0.547412 | 1.391463 | 0        | 0        | 0        |
| 28770 | LOC119625 | 0.323146 | -1.04667 | 3.988252 | -0.26244 | 0.792984 | NA       | 0        | 0.547412 | 1.391463 | 0        | 0        | 0        |
| 29586 | LOC119625 | 0.323146 | -1.04667 | 3.988252 | -0.26244 | 0.792984 | NA       | 0        | 0.547412 | 1.391463 | 0        | 0        | 0        |
| 10809 | LOC103247 | 48.4099  | -1.04678 | 0.392155 | -2.66931 | 0.007601 | 0.018694 | 56.91907 | 72.25836 | 65.39875 | 31.24978 | 38.50399 | 26.12947 |
| 4924  | LRRIQ1    | 285.9133 | -1.0469  | 0.221267 | -4.7314  | 2.23E-06 | 1.20E-05 | 344.7669 | 500.3344 | 311.6877 | 183.0344 | 179.6853 | 195.971  |
| 2891  | ODAD4     | 620.168  | -1.04735 | 0.159649 | -6.5603  | 5.37E-11 | 4.94E-10 | 765.426  | 985.8887 | 759.0429 | 410.7114 | 365.7879 | 434.1511 |
| 3649  | RPS18     | 55867.37 | -1.04766 | 0.183821 | -5.69933 | 1.20E-08 | 8.76E-08 | 86088.74 | 47636.87 | 92189.28 | 37493.04 | 37577.76 | 34218.55 |
| 5362  | LOC119619 | 214.096  | -1.04799 | 0.233741 | -4.48357 | 7.34E-05 | 3.64E-05 | 297.6054 | 322.4256 | 246.9846 | 167.4095 | 98.39909 | 151.7519 |
| 6300  | LOC103220 | 141.7843 | -1.048   | 0.260327 | -4.02571 | 5.68E-05 | 0.00024  | 227.1342 | 170.7925 | 174.6286 | 113.8385 | 74.86887 | 89.44317 |
| 13393 | LOC119625 | 33.88995 | -1.04821 | 0.492332 | -2.12908 | 0.033248 | 0.065997 | 42.28274 | 60.76271 | 33.39511 | 17.85702 | 29.94755 | 19.09461 |
| 4207  | SPIN4     | 252.9925 | -1.04824 | 0.201098 | -5.21257 | 1.86E-07 | 1.18E-06 | 319.831  | 378.809  | 324.9066 | 133.9276 | 194.6591 | 165.8216 |
| 12471 | ATP2A3    | 40.13456 | -1.04838 | 0.454555 | -2.30638 | 0.02109  | 0.044958 | 49.32986 | 48.71965 | 62.61582 | 24.5534  | 38.50399 | 17.08465 |
| 24260 | LOC119619 | 1.026642 | -1.04867 | 2.855392 | -0.36726 | 0.713425 | 0.781765 | 0.542086 | 0        | 3.478657 | 0        | 2.139111 | 0        |
| 16472 | LOC119624 | 15.96007 | -1.0496  | 0.665732 | -1.57662 | 0.114884 | 0.185417 | 20.0572  | 26.27577 | 18.78475 | 11.16063 | 6.417332 | 13.06473 |
| 19807 | LOC119620 | 7.785371 | -1.04997 | 0.998036 | -1.05204 | 0.292781 | 0.392971 | 7.047123 | 18.06459 | 6.957314 | 4.464254 | 2.139111 | 8.039836 |
| 1741  | CRYBG1    | 17860.23 | -1.05    | 0.121905 | -8.6133  | 7.10E-18 | 1.08E-16 | 21981.06 | 28793.86 | 21489.75 | 11473.13 | 11193.97 | 12229.6  |
| 1306  | LOC119625 | 4571.272 | -1.05043 | 0.106862 | -9.82975 | 8.38E-23 | 1.71E-21 | 6052.394 | 6577.7   | 5874.06  | 3053.55  | 2643.941 | 3225.984 |
| 1475  | FTH1      | 30273.92 | -1.05057 | 0.112777 | -9.31549 | 1.21E-20 | 2.19E-19 | 37438.11 | 47209.89 | 37860.31 | 19127.1  | 18807.06 | 21201.05 |
| 3192  | LOC103227 | 12313.11 | -1.05061 | 0.17024  | -6.17131 | 6.77E-10 | 5.64E-09 | 18763.24 | 11189.64 | 19871.48 | 8363.78  | 7869.788 | 7820.75  |
| 24236 | LOC119619 | 1.043033 | -1.05066 | 2.843543 | -0.36949 | 0.711764 | 0.780749 | 0        | 0.547412 | 3.478657 | 2.232127 | 0        | 0        |
| 17119 | LOC103235 | 13.61992 | -1.05093 | 0.710987 | -1.47813 | 0.139372 | 0.216438 | 17.34676 | 22.44388 | 15.30609 | 11.16063 | 6.417332 | 9.044815 |
| 11448 | LOC103229 | 44.51624 | -1.0516  | 0.416194 | -2.52671 | 0.011514 | 0.026736 | 58.54533 | 55.28859 | 68.18167 | 20.08914 | 27.80844 | 37.18424 |
| 11579 | LOC119627 | 41.16515 | -1.05182 | 0.420854 | -2.49924 | 0.012446 | 0.028575 | 60.17159 | 59.66789 | 46.614   | 22.32127 | 32.08666 | 26.12947 |
| 838   | TADA3     | 3965.511 | -1.05187 | 0.088862 | -11.837  | 2.51E-32 | 7.97E-31 | 5369.908 | 5483.424 | 5203.375 | 2542.393 | 2500.62  | 2693.345 |
| 1459  | RPL7      | 43337.96 | -1.05215 | 0.112572 | -9.34643 | 9.07E-21 | 1.65E-19 | 63787.85 | 48883.33 | 62758.45 | 28109.18 | 27831.97 | 28656.99 |
| 4567  | LOC103    |          |          |          |          |          |          |          |          |          |          |          |          |



|       |           |          |          |          |          |          |          |          |          |          |          |          |          |
|-------|-----------|----------|----------|----------|----------|----------|----------|----------|----------|----------|----------|----------|----------|
| 1865  | POC1A     | 1266.963 | -1.05256 | 0.12727  | -8.27024 | 1.34E-16 | 1.91E-15 | 1847.972 | 1529.469 | 1757.417 | 745.5304 | 829.9749 | 891.4168 |
| 2995  | ING1      | 479.7841 | -1.05295 | 0.163939 | -6.42281 | 1.34E-10 | 1.19E-09 | 628.8202 | 747.7645 | 564.9339 | 299.105  | 331.5622 | 306.5187 |
| 2565  | LOC10322  | 4404.911 | -1.05296 | 0.149812 | -7.02857 | 2.09E-12 | 2.16E-11 | 6409.087 | 4440.057 | 6985.143 | 2957.568 | 2774.427 | 2863.187 |
| 1866  | RPL26L1   | 2007.604 | -1.05306 | 0.127355 | -8.26865 | 1.35E-16 | 1.93E-15 | 2765.183 | 2322.121 | 3036.867 | 1406.24  | 1294.162 | 1221.05  |
| 2336  | HOMER2    | 1609.942 | -1.05308 | 0.143119 | -7.35806 | 1.87E-13 | 2.12E-12 | 1925.491 | 2633.598 | 1962.658 | 1006.689 | 1009.66  | 1121.557 |
| 6321  | GABRA5    | 165.478  | -1.05328 | 0.262267 | -4.01607 | 5.92E-05 | 0.000249 | 178.8885 | 291.7705 | 198.9792 | 118.3027 | 98.39909 | 106.5278 |
| 2859  | TMEM54    | 954.9572 | -1.05341 | 0.159609 | -6.59993 | 4.11E-11 | 3.82E-10 | 1476.101 | 1018.733 | 1375.461 | 613.8349 | 573.2817 | 672.3313 |
| 9252  | LOC119618 | 89.73927 | -1.05412 | 0.34649  | -3.04229 | 0.002348 | 0.006746 | 101.3702 | 166.9606 | 96.70666 | 60.26743 | 42.78221 | 70.34856 |
| 1250  | RIMKLB    | 3684.572 | -1.05442 | 0.105346 | -10.0092 | 1.39E-23 | 2.95E-22 | 4695.01  | 5497.657 | 4735.148 | 2274.537 | 2376.552 | 2528.528 |
| 11254 | LOC119618 | 43.33774 | -1.05482 | 0.410576 | -2.56913 | 0.010195 | 0.024083 | 62.88202 | 49.81448 | 61.92009 | 33.4819  | 27.80844 | 24.11951 |
| 952   | PABPC4    | 5668.376 | -1.05492 | 0.09423  | -11.1952 | 4.31E-29 | 1.20E-27 | 7519.28  | 8097.863 | 7348.315 | 3718.724 | 3441.829 | 3884.246 |
| 1131  | YTHDF2    | 3296.069 | -1.05507 | 0.101559 | -10.3887 | 2.79E-25 | 6.56E-24 | 4287.903 | 4777.263 | 4291.967 | 2145.074 | 1997.929 | 2276.278 |
| 18997 | LOC11962  | 9.260338 | -1.05529 | 0.889843 | -1.18593 | 0.23565  | 0.329781 | 17.34676 | 12.04306 | 8.348776 | 2.232127 | 8.556443 | 7.034856 |
| 11989 | LOC10322  | 50.95095 | -1.05538 | 0.438179 | -2.40855 | 0.016016 | 0.035515 | 89.98634 | 46.53    | 71.66033 | 20.08914 | 34.22577 | 43.21412 |
| 17686 | LOC10323  | 12.2806  | -1.05542 | 0.760607 | -1.3876  | 0.16526  | 0.248413 | 16.80468 | 19.70683 | 12.52316 | 8.928508 | 10.69555 | 5.024897 |
| 18305 | LOC10324  | 11.5908  | -1.05562 | 0.823905 | -1.28124 | 0.200109 | 0.290626 | 10.84173 | 22.44388 | 13.91463 | 11.16063 | 2.139111 | 9.044815 |
| 1383  | PHLDB2    | 7683.367 | -1.05589 | 0.109922 | -9.6058  | 7.56E-22 | 1.45E-20 | 9608.481 | 11706.4  | 9820.248 | 4743.27  | 4812.999 | 5408.8   |
| 4138  | TMETAP1D  | 299.944  | -1.05605 | 0.20054  | -5.26603 | 1.39E-07 | 8.96E-07 | 453.7263 | 319.6885 | 441.0937 | 189.7308 | 207.4937 | 187.9312 |
| 4394  | CCDC113   | 265.8469 | -1.0566  | 0.207863 | -5.08313 | 3.71E-07 | 2.25E-06 | 319.831  | 440.6665 | 315.862  | 183.0344 | 166.8506 | 168.8366 |
| 1648  | THG1L     | 781.349  | -1.05666 | 0.119312 | -8.85628 | 8.27E-19 | 1.33E-17 | 1062.489 | 1063.621 | 1038.727 | 520.0856 | 502.691  | 500.4798 |
| 2156  | PCK2      | 1842.506 | -1.05675 | 0.137734 | -7.6724  | 1.69E-14 | 2.08E-13 | 2633.456 | 2171.583 | 2667.434 | 1249.991 | 998.9647 | 1333.608 |
| 1317  | LOC11962  | 4562.608 | -1.05727 | 0.107857 | -9.80246 | 1.10E-22 | 2.22E-21 | 6052.394 | 6577.7   | 5867.798 | 3031.228 | 2622.55  | 3223.974 |
| 1925  | TMEM101   | 1795.927 | -1.05734 | 0.129845 | -8.14311 | 3.85E-16 | 5.32E-15 | 2630.745 | 2057.174 | 2595.078 | 1167.402 | 1075.973 | 1249.189 |
| 6546  | LOC10324  | 241.3303 | -1.0576  | 0.26971  | -3.92124 | 8.81E-05 | 0.000358 | 269.4169 | 472.9638 | 235.1572 | 156.2489 | 160.4333 | 153.7619 |
| 1126  | HEATR6    | 4121.236 | -1.05773 | 0.101584 | -10.4123 | 2.18E-25 | 5.15E-24 | 5427.911 | 6141.961 | 5134.498 | 2622.749 | 2688.862 | 2711.435 |
| 2936  | PALLD     | 1114.134 | -1.0578  | 0.162674 | -6.50259 | 7.89E-11 | 7.15E-10 | 1323.233 | 1882.002 | 1314.237 | 703.12   | 665.2634 | 796.9487 |
| 8475  | LOC10323  | 85.08151 | -1.05828 | 0.324522 | -3.26104 | 0.00111  | 0.003482 | 134.9795 | 84.30142 | 125.9274 | 49.10679 | 59.8951  | 56.27885 |
| 16960 | ZNF501    | 17.0889  | -1.05843 | 0.706748 | -1.4976  | 0.134237 | 0.21036  | 22.22554 | 16.96977 | 29.22072 | 6.696381 | 21.39111 | 6.029877 |
| 17985 | LOC11962  | 11.25109 | -1.05847 | 0.786333 | -1.34609 | 0.178275 | 0.263525 | 17.88885 | 12.59047 | 14.61036 | 6.696381 | 10.9555  | 5.024897 |
| 1922  | NUF2      | 1387.356 | -1.0585  | 0.129919 | -8.14738 | 3.72E-16 | 5.14E-15 | 1741.181 | 2155.16  | 1723.327 | 906.2436 | 954.0434 | 844.1828 |
| 21331 | LOC11962  | 3.860321 | -1.05882 | 1.279329 | -0.82764 | 0.407877 | 0.50834  | 4.336691 | 6.568942 | 4.87012  | 2.232127 | 2.139111 | 3.014938 |
| 11674 | LOC11962  | 46.95113 | -1.0605  | 0.428194 | -2.47668 | 0.013261 | 0.030197 | 49.87195 | 78.8273  | 63.31155 | 31.24978 | 19.252   | 39.1942  |
| 22781 | LOC11962  | 2.339261 | -1.06069 | 1.780669 | -0.59567 | 0.551397 | 0.64347  | 3.252518 | 3.284471 | 3.478657 | 0        | 0        | 4.019918 |
| 2828  | EMG1      | 1765.799 | -1.06085 | 0.159504 | -6.65097 | 9.91E-11 | 2.74E-10 | 2761.388 | 1773.614 | 2627.777 | 1178.563 | 1086.668 | 1166.781 |
| 1166  | LOC10322  | 1588.974 | -1.0609  | 0.10326  | -10.2741 | 9.22E-25 | 2.10E-23 | 2211.712 | 2204.427 | 2029.448 | 1029.011 | 1016.078 | 1043.169 |
| 15852 | LOC11962  | 22.83546 | -1.06118 | 0.627485 | -1.69116 | 0.090807 | 0.152289 | 34.15144 | 14.23271 | 43.83108 | 15.62489 | 17.11289 | 12.05975 |
| 16598 | RPL3      | 15.82393 | -1.06184 | 0.681749 | -1.55752 | 0.119347 | 0.191159 | 26.56223 | 16.42235 | 20.87194 | 15.62489 | 6.417332 | 9.044815 |
| 2599  | SOGA3     | 897.7342 | -1.06287 | 0.152235 | -6.98176 | 2.92E-12 | 2.98E-11 | 1109.109 | 1437.503 | 1092.298 | 651.7811 | 554.0297 | 541.6839 |
| 12095 | LOC10322  | 35.79785 | -1.0629  | 0.445114 | -2.38792 | 0.016944 | 0.037243 | 44.99317 | 53.64636 | 45.91827 | 22.32127 | 27.80844 | 20.09959 |
| 14383 | LOC11962  | 24.62303 | -1.06299 | 0.545702 | -1.94793 | 0.051423 | 0.095049 | 39.03022 | 25.72836 | 35.4823  | 11.16063 | 19.252   | 17.8465  |
| 1404  | LOC10323  | 8029.028 | -1.06328 | 0.111694 | -9.51954 | 1.74E-21 | 3.29E-20 | 9938.611 | 12582.26 | 10058.88 | 5272.284 | 5242.96  | 5079.166 |
| 2140  | HMBS      | 887.8401 | -1.06362 | 0.138066 | -7.70368 | 1.32E-14 | 1.64E-13 | 1316.186 | 1078.949 | 1214.051 | 517.8535 | 566.8643 | 633.1371 |
| 19539 | TRNAL-CA  | 8.531187 | -1.06374 | 0.973454 | -1.09275 | 0.274503 | 0.373491 | 9.757555 | 9.306001 | 16.69755 | 2.232127 | 2.139111 | 11.05477 |
| 885   | GTF3A     | 3824.34  | -1.06376 | 0.091939 | -11.5703 | 5.83E-31 | 1.75E-29 | 5169.336 | 5229.425 | 5131.019 | 2350.43  | 2425.751 | 2640.081 |
| 6845  | LOC10324  | 104.9517 | -1.06385 | 0.280025 | -3.79913 | 0.000145 | 0.000564 | 160.9997 | 117.1461 | 147.4951 | 71.42806 | 66.31243 | 66.32864 |
| 1223  | RIOX2     | 1742.816 | -1.06402 | 0.105475 | -10.0879 | 6.25E-24 | 1.36E-22 | 2271.884 | 2535.612 | 2268.084 | 1093.742 | 1135.868 | 1151.706 |
| 16728 | LOC11962  | 17.57978 | -1.06444 | 0.692239 | -1.53768 | 0.124126 | 0.197268 | 26.02015 | 24.63353 | 19.48048 | 8.928508 | 21.39111 | 5.024897 |
| 23900 | ZSCAN4    | 1.01811  | -1.06447 | 2.517155 | -0.42288 | 0.67238  | 0.747917 | 1.084173 | 2.189647 | 0.695731 | 0        | 2.139111 | 0        |
| 13423 | ICAM5     | 34.21845 | -1.06477 | 0.501699 | -2.12232 | 0.033811 | 0.066964 | 47.16151 | 35.03436 | 57.04997 | 31.24978 | 10.69555 | 24.11951 |
| 23939 | LOC11962  | 1.034501 | -1.06477 | 2.550565 | -0.41746 | 0.676339 | 0.075112 | 0.542086 | 2.737059 | 0.695731 | 2.232127 | 0        | 0        |
| 9479  | LOC10322  | 70.51899 | -1.06485 | 0.356094 | -2.99035 | 0.002787 | 0.007815 | 94.86511 | 76.09024 | 114.0999 | 62.49956 | 36.36488 | 39.1942  |
| 17581 | ZNF138    | 12.3747  | -1.06509 | 0.759098 | -1.40309 | 0.160589 | 0.242834 | 14.09425 | 20.80165 | 14.61036 | 11.16063 | 8.556443 | 5.024897 |
| 1848  | WASF2     | 3327.211 | -1.06539 | 0.128115 | -8.31589 | 9.11E-17 | 1.31E-15 | 4068.9   | 5293.472 | 4152.125 | 2055.789 | 2034.294 | 2358.687 |
| 972   | SEPHS1    | 3888.257 | -1.06552 | 0.095755 | -11.1276 | 9.20E-29 | 2.52E-27 | 5295.642 | 5454.959 | 5037.791 | 2645.07  | 2327.352 | 2568.728 |
| 2065  | LOC10322  | 986.477  | -1.06561 | 0.135597 | -7.85864 | 3.88E-15 | 5.00E-14 | 1456.044 | 1177.483 | 1377.548 | 709.3707 | 598.951  | 699.4657 |
| 1789  | LOC10324  | 11010.74 | -1.06581 | 0.125663 | -8.48151 | 2.22E-17 | 3.30E-16 | 15739.48 | 12045.8  | 16922.27 | 7359.323 | 6911.467 | 7086.11  |
| 14214 | LOC11962  | 27.39271 | -1.0659  | 0.539872 | -1.97436 | 0.048341 | 0.090413 | 42.28274 | 35.58177 | 32.00364 | 15.62489 | 27.80844 | 11.05477 |
| 7257  | LOC10324  | 128.6109 | -1.0666  | 0.292233 | -3.64984 | 0.000262 | 0.000961 | 145.8212 | 236.4819 | 139.842  | 84.82083 | 81.28621 | 83.4133  |
| 1846  | SLC39A11  | 909.5814 | -1.06675 | 0.128225 | -8.31935 | 8.84E-17 | 1.27E-15 | 1257.64  | 1251.931 | 1191.788 | 573.6566 | 526.2212 | 656.2516 |
| 2320  | IGF2BP2   | 6193.358 | -1.06717 | 0.14455  | -7.3827  | 1.55E-13 | 1.78E-12 | 7172.887 | 10640.59 | 7342.749 | 3944.168 | 3925.268 | 4134.486 |
| 1247  | STEAP3    | 6251.24  | -1.06811 | 0.10664  | -10.0161 | 1.30E-23 | 2.76E-22 | 8983.455 | 7852.622 | 8567.236 | 4118.274 | 3600.123 | 4385.73  |
| 2311  | RPL13     | 23393.92 | -1.06813 | 0.144423 | -7.39587 | 1.40E-13 | 1.62E-12 | 36396.22 | 23742.89 | 34900.67 | 15267.75 | 14199.42 | 15856.57 |
| 7372  | LOC11962  | 87.54778 | -1.06817 | 0.295982 | -3.60891 | 0.000307 | 0.001109 | 118.1748 | 107.8401 | 128.7103 | 66.96381 | 51.33866 | 52.25893 |
| 1689  | FAM169A   | 2640.647 | -1.06828 | 0.122078 | -8.75079 | 2.12E-18 | 3.33E-17 | 3411.35  | 4142.813 | 3176.709 | 1662.935 | 1664.228 | 1785.849 |
| 6808  | LOC10324  | 171.0989 | -1.06902 | 0.280278 | -3.81416 | 0.000137 | 0.000534 | 277.5482 | 164.2235 | 253.942  | 136.1597 | 79.14709 | 115.5726 |
| 3474  | LOC11962  | 330.7635 | -1.06925 | 0.181678 | -5.88541 | 3.97E-09 | 3.04E-08 | 462.3997 | 454.3518 | 430.6577 | 232.1412 | 166.8506 | 238.1801 |
| 19016 | LOC11962  | 8.749745 | -1.06943 | 0.905082 | -1.18159 | 0.237369 | 0.331849 | 8.673382 | 15.87494 | 11.1317  | 2.232127 | 8.556443 | 6.029877 |
| 18217 | LOC11962  | 11.27234 | -1.06987 | 0.823701 | -1.29885 | 0.193994 | 0.283106 | 16.26259 | 15.32753 | 13.2189  | 13.39276 | 6.417332 | 3.014938 |
| 1134  | CDK14     | 5002.451 | -1.07013 | 0.10308  | -10.3815 | 3.01E-25 | 7.05E-24 | 6522.925 | 7434.947 | 6379.857 | 3020.068 | 3227.918 | 3428.99  |
| 15071 | ERV3-1    | 22.56658 | -1.07018 | 0.587538 | -1.82146 | 0.068537 | 0.120898 | 34.15144 | 26.27577 | 29.91645 | 15.62489 | 21.39111 | 8.039836 |
| 7018  | LOC10321  | 116.25   |          |          |          |          |          |          |          |          |          |          |          |



|       |           |          |          |          |          |          |          |          |          |          |          |          |          |
|-------|-----------|----------|----------|----------|----------|----------|----------|----------|----------|----------|----------|----------|----------|
| 15185 | LOC119616 | 24.42962 | -1.07101 | 0.595473 | -1.79859 | 0.072083 | 0.126199 | 41.74065 | 18.06459 | 40.35242 | 15.62489 | 10.69555 | 20.09959 |
| 568   | RPL37     | 29149.79 | -1.07106 | 0.076775 | -13.9507 | 3.12E-44 | 1.46E-42 | 38618.23 | 39569.12 | 40307.2  | 19276.65 | 18635.93 | 18491.62 |
| 2592  | COL16A1   | 414.1627 | -1.07122 | 0.153205 | -6.99204 | 2.71E-12 | 2.78E-11 | 578.9482 | 520.5886 | 583.0229 | 279.0159 | 263.1106 | 260.2897 |
| 2091  | NOP14     | 2458.436 | -1.07127 | 0.13722  | -7.80694 | 5.86E-15 | 7.45E-14 | 3026.468 | 4059.606 | 2909.549 | 1562.489 | 1559.412 | 1633.092 |
| 928   | ALYREF    | 2618.893 | -1.07199 | 0.094461 | -11.3485 | 7.55E-30 | 2.16E-28 | 3596.743 | 3449.242 | 3608.759 | 1649.542 | 1634.281 | 1774.794 |
| 14785 | NRTN      | 21.08037 | -1.07211 | 0.571432 | -1.87618 | 0.06063  | 0.109019 | 28.73058 | 26.27577 | 31.30791 | 13.39276 | 10.69555 | 16.07967 |
| 6081  | FAM227B   | 112.6926 | -1.07234 | 0.259627 | -4.13029 | 3.62E-05 | 0.000158 | 156.1209 | 146.159  | 155.1481 | 66.96381 | 83.42532 | 68.3386  |
| 5835  | KRT3      | 120.491  | -1.07263 | 0.252021 | -4.25613 | 2.08E-05 | 9.48E-05 | 152.3263 | 173.5295 | 163.4969 | 73.66019 | 85.56443 | 74.36848 |
| 8575  | LOC119626 | 69.61111 | -1.07265 | 0.33159  | -3.23487 | 0.001217 | 0.003773 | 100.286  | 81.01695 | 102.9682 | 44.64254 | 38.50399 | 50.24897 |
| 12465 | LOC103243 | 44.03736 | -1.07269 | 0.464993 | -2.30689 | 0.021061 | 0.044918 | 53.12446 | 62.95236 | 60.52863 | 46.87467 | 25.66933 | 15.07469 |
| 1589  | SP4       | 1947.905 | -1.07271 | 0.11917  | -9.00146 | 2.23E-19 | 3.73E-18 | 2442.641 | 3018.976 | 2460.802 | 1256.687 | 1229.989 | 1278.334 |
| 2681  | TBX20     | 435.6408 | -1.07307 | 0.156483 | -6.85739 | 7.01E-12 | 6.95E-11 | 603.3421 | 605.4375 | 568.4125 | 263.391  | 256.6933 | 316.5685 |
| 1472  | LIG3      | 2976.66  | -1.07311 | 0.1151   | -9.32326 | 1.13E-20 | 2.04E-19 | 3727.386 | 4558.846 | 3825.131 | 1897.308 | 1801.131 | 2050.158 |
| 1494  | PACRGL    | 1758.626 | -1.07313 | 0.115887 | -9.2601  | 2.04E-20 | 3.63E-19 | 2383.012 | 2543.275 | 2224.253 | 1037.939 | 1257.797 | 1105.477 |
| 13925 | LOC119620 | 24.51693 | -1.07332 | 0.52952  | -2.02698 | 0.042665 | 0.081448 | 31.9831  | 32.2973  | 34.78657 | 17.85702 | 17.11289 | 13.06473 |
| 13445 | KCNIP1    | 42.15617 | -1.0734  | 0.506798 | -2.11801 | 0.034174 | 0.067572 | 51.49821 | 54.74118 | 62.61582 | 31.24978 | 42.78221 | 10.04979 |
| 685   | EIF2S3    | 17386.16 | -1.07378 | 0.083294 | -12.8914 | 5.03E-38 | 1.95E-36 | 23407.83 | 24666.38 | 22650.93 | 11131.62 | 10851.71 | 11608.52 |
| 13658 | LOC103245 | 14.12111 | -1.07381 | 0.517192 | -2.07623 | 0.037873 | 0.073719 | 71.01331 | 27.918   | 68.18167 | 35.71403 | 29.94755 | 16.07967 |
| 1200  | ATP5IF1   | 2678.744 | -1.07397 | 0.10581  | -10.15   | 3.31E-24 | 7.34E-23 | 3328.952 | 3963.809 | 3601.106 | 1707.577 | 1794.714 | 1676.306 |
| 1754  | PKP4      | 4424.59  | -1.07412 | 0.125073 | -8.58797 | 8.85E-18 | 1.34E-16 | 5495.672 | 7109.237 | 5398.18  | 2725.427 | 2782.983 | 3036.043 |
| 8003  | LOC103247 | 10058.63 | -1.07443 | 0.315008 | -3.4108  | 0.000648 | 0.002152 | 16247.95 | 7719.601 | 16952.89 | 6712.006 | 6297.542 | 6421.819 |
| 22445 | LOC103238 | 2.655456 | -1.07464 | 1.653709 | -0.64983 | 0.515799 | 0.610911 | 4.878777 | 4.379295 | 1.391463 | 0        | 4.278221 | 1.004979 |
| 10323 | LOC119615 | 70.00555 | -1.0759  | 0.386584 | -2.7831  | 0.005384 | 0.013866 | 121.9694 | 59.66789 | 102.2725 | 40.17829 | 57.75599 | 38.18922 |
| 1252  | IQGA3     | 3410.166 | -1.07628 | 0.107647 | -9.99822 | 1.55E-23 | 3.29E-22 | 4719.946 | 4584.027 | 4586.957 | 1975.432 | 2128.415 | 2466.22  |
| 9495  | LOC103227 | 85.46287 | -1.07636 | 0.360564 | -2.9852  | 0.002834 | 0.007935 | 125.222  | 70.06871 | 153.0609 | 55.80317 | 51.33866 | 57.28383 |
| 20269 | RAMP1     | 6.782689 | -1.07698 | 1.094126 | -0.98433 | 0.324953 | 0.426174 | 12.46799 | 5.474118 | 10.43597 | 0        | 4.278221 | 8.039836 |
| 1195  | LONP1     | 14013.27 | -1.07711 | 0.105997 | -10.1617 | 2.94E-22 | 6.54E-23 | 19776.39 | 17871.9  | 19406.73 | 8749.938 | 8124.342 | 10150.29 |
| 1343  | MTO1      | 1356.255 | -1.07746 | 0.110707 | -9.73249 | 2.19E-22 | 4.34E-21 | 1922.238 | 1762.666 | 1841.601 | 868.2974 | 817.1403 | 925.5861 |
| 1389  | HNRNPLL   | 1583.804 | -1.07864 | 0.112638 | -9.57611 | 1.01E-21 | 1.93E-20 | 2251.827 | 1935.648 | 2260.431 | 1033.475 | 1022.495 | 998.9496 |
| 7003  | LOC103220 | 123.387  | -1.07892 | 0.289141 | -3.73147 | 0.00019  | 0.000723 | 209.7874 | 132.4737 | 162.8011 | 69.19594 | 70.59065 | 95.47305 |
| 1763  | FTSJ3     | 5063.448 | -1.07944 | 0.126078 | -8.56175 | 1.11E-17 | 1.68E-16 | 6200.384 | 8214.462 | 6210.794 | 3160.692 | 3157.327 | 3437.03  |
| 9984  | JCHAIN    | 50.38939 | -1.07945 | 0.376725 | -2.86536 | 0.004165 | 0.011091 | 68.84497 | 70.61612 | 64.70302 | 37.94616 | 32.08666 | 28.13943 |
| 4900  | LOC103225 | 156.6142 | -1.07952 | 0.227666 | -4.7417  | 2.12E-06 | 1.15E-05 | 201.6561 | 235.3871 | 199.6749 | 102.6778 | 104.8164 | 95.47305 |
| 16790 | FAM229A   | 14.12111 | -1.07964 | 0.706697 | -1.52713 | 0.126729 | 0.200624 | 21.14137 | 17.51718 | 18.08902 | 13.39276 | 8.556443 | 6.029877 |
| 9367  | CUBN      | 106.0185 | -1.07967 | 0.358163 | -3.01447 | 0.002574 | 0.007306 | 146.3633 | 139.0426 | 141.9292 | 80.35657 | 96.25998 | 32.15934 |
| 5366  | LOC103235 | 171.7049 | -1.07968 | 0.240938 | -4.48117 | 7.42E-06 | 3.68E-05 | 241.2284 | 203.0898 | 253.942  | 89.28508 | 141.1813 | 101.5029 |
| 12853 | CCDC158   | 30.8335  | -1.07979 | 0.48465  | -2.22798 | 0.025882 | 0.053534 | 35.23561 | 51.45671 | 38.96096 | 17.85702 | 21.39111 | 20.09959 |
| 1575  | TMA16     | 977.4799 | -1.08004 | 0.119428 | -9.04345 | 1.52E-19 | 2.56E-18 | 1304.26  | 1373.456 | 1297.539 | 651.7811 | 660.9852 | 576.8582 |
| 1649  | PCGF3     | 1796.275 | -1.08005 | 0.121982 | -8.85417 | 8.43E-19 | 1.36E-17 | 2386.264 | 2708.046 | 2229.123 | 1120.528 | 1067.416 | 1266.274 |
| 5553  | LOC103234 | 143.9905 | -1.08082 | 0.246169 | -4.39058 | 1.13E-05 | 5.41E-05 | 200.0299 | 170.7925 | 217.0682 | 75.89232 | 102.6773 | 97.48301 |
| 17175 | RUNX3     | 15.14763 | -1.08151 | 0.735106 | -1.47122 | 0.141231 | 0.218598 | 18.97302 | 24.08612 | 17.39328 | 17.85702 | 8.556443 | 4.019918 |
| 3148  | CEP44     | 604.1277 | -1.08161 | 0.173894 | -6.21995 | 4.97E-10 | 4.20E-09 | 929.6781 | 634.4503 | 896.7977 | 408.4792 | 376.4835 | 378.8773 |
| 852   | DUSP1     | 4613.054 | -1.08165 | 0.091819 | -11.7803 | 4.93E-32 | 1.54E-30 | 6457.875 | 6000.728 | 6343.679 | 3008.907 | 2780.844 | 3086.292 |
| 23052 | LRRC26    | 2.086548 | -1.08219 | 1.952537 | -0.55425 | 0.579409 | 0.668264 | 1.626259 | 3.831883 | 2.782925 | 0        | 4.278221 | 0        |
| 2875  | ATP10A    | 457.4666 | -1.08285 | 0.164545 | -6.58086 | 4.68E-11 | 4.33E-10 | 631.5306 | 606.5323 | 627.5497 | 341.5154 | 233.1631 | 304.5088 |
| 6079  | LOC103237 | 177.3949 | -1.08373 | 0.262274 | -4.13204 | 3.60E-05 | 0.000157 | 291.6425 | 168.0554 | 264.3779 | 111.6063 | 109.0946 | 119.5926 |
| 1276  | ZNHIT3    | 1320.964 | -1.08448 | 0.109369 | -9.91578 | 3.55E-23 | 7.41E-22 | 1875.619 | 1686.028 | 1826.991 | 832.5834 | 834.2532 | 870.3122 |
| 9760  | PCDHGB3   | 59.87508 | -1.0847  | 0.372288 | -2.9136  | 0.003573 | 0.009732 | 92.15468 | 84.30142 | 67.48594 | 26.78552 | 51.33866 | 37.18424 |
| 5100  | TREX2     | 530.1409 | -1.08506 | 0.234469 | -4.62772 | 3.70E-06 | 1.93E-05 | 878.1799 | 449.4251 | 837.6606 | 314.7299 | 305.8928 | 394.9569 |
| 13200 | LOC119620 | 55.01468 | -1.08601 | 0.50064  | -2.16925 | 0.030064 | 0.060549 | 30.10765 | 97.03346 | 98.79385 | 31.24978 | 25.66933 | 47.23404 |
| 1481  | LOC119618 | 1990.264 | -1.08613 | 0.116766 | -9.30176 | 1.38E-20 | 2.48E-19 | 2577.079 | 3027.735 | 2517.852 | 126.152  | 1200.041 | 1375.727 |
| 16206 | ZGLP1     | 16.75011 | -1.08616 | 0.667778 | -1.62653 | 0.103836 | 0.170338 | 26.02015 | 20.25424 | 22.2634  | 15.62489 | 4.278221 | 12.05975 |
| 1574  | IFRD2     | 2021.613 | -1.08694 | 0.120189 | -9.04359 | 1.52E-19 | 2.56E-18 | 2932.687 | 2453.5   | 2869.196 | 1209.813 | 1236.406 | 1428.076 |
| 1478  | POLG2     | 1112.165 | -1.08846 | 0.11699  | -9.30385 | 1.35E-20 | 2.44E-19 | 1608.37  | 1442.978 | 1490.952 | 660.7096 | 727.2976 | 742.6798 |
| 1203  | PHLDA1    | 6888.76  | -1.08855 | 0.107381 | -10.1372 | 3.78E-24 | 8.34E-23 | 8579.059 | 10660.3  | 8876.141 | 4283.452 | 4400.151 | 4533.462 |
| 1617  | GLK       | 763.614  | -1.08891 | 0.121895 | -8.93321 | 4.14E-19 | 6.80E-18 | 1035.385 | 1015.996 | 1062.382 | 504.4607 | 494.1346 | 469.3254 |
| 823   | SLC2A3    | 8513.112 | -1.08932 | 0.091436 | -11.9135 | 1.01E-32 | 3.25E-31 | 11860.31 | 11713.52 | 11182.49 | 5453.086 | 5050.44  | 5818.831 |
| 6403  | LOC103226 | 111.6663 | -1.08954 | 0.27387  | -3.97832 | 6.94E-05 | 0.000288 | 178.8885 | 139.0426 | 137.0591 | 80.35657 | 66.31243 | 68.3386  |
| 18602 | TRNAH-GLU | 10.19757 | -1.09043 | 0.882599 | -1.23548 | 0.216653 | 0.30963  | 18.43094 | 6.568942 | 17.39328 | 4.464254 | 4.278221 | 10.04979 |
| 9738  | LOC119625 | 62.05661 | -1.09115 | 0.37376  | -2.9194  | 0.003507 | 0.009575 | 103.5385 | 66.78424 | 84.87923 | 37.94616 | 29.94755 | 49.24399 |
| 1497  | RHBDD1    | 1308.948 | -1.09194 | 0.117977 | -9.25554 | 2.13E-20 | 3.79E-19 | 1740.639 | 1955.355 | 1653.058 | 801.3336 | 829.9749 | 873.3272 |
| 19300 | CCDC65    | 10.35811 | -1.09196 | 0.961666 | -1.13549 | 0.256169 | 0.352844 | 9.215468 | 15.32753 | 16.69755 | 15.62489 | 4.278221 | 1.004979 |
| 6870  | LOC103224 | 98.37726 | -1.09214 | 0.288261 | -3.78872 | 0.000151 | 0.000586 | 139.8583 | 133.0211 | 130.7975 | 44.64254 | 70.59065 | 71.35354 |
| 1658  | MARS2     | 1971.56  | -1.09228 | 0.12376  | -8.82582 | 1.09E-18 | 1.74E-17 | 2979.307 | 2437.077 | 2644.475 | 1176.331 | 1187.206 | 1404.961 |
| 1953  | KPTN      | 639.6212 | -1.0939  | 0.135181 | -8.09211 | 5.86E-16 | 7.98E-15 | 886.3112 | 841.372  | 889.1447 | 424.1041 | 363.6488 | 433.1462 |
| 5294  | TERB1     | 145.1513 | -1.0949  | 0.242183 | -4.52095 | 6.16E-06 | 3.09E-05 | 217.9187 | 179.0037 | 194.1091 | 91.51721 | 106.9555 | 81.40334 |
| 10245 | LOC103246 | 50.9933  | -1.09505 | 0.390543 | -2.80391 | 0.005049 | 0.013101 | 65.59245 | 79.92212 | 63.31155 | 22.32127 | 40.6431  | 34.1693  |
| 23594 | LOC119615 | 1.278823 | -1.09518 | 2.335302 | -0.46897 | 0.639092 | 0.720109 | 0.542086 | 1.642235 | 3.478657 | 0        | 0        | 2.009959 |
| 1633  | FBXO4     | 1731.976 | -1.09529 | 0.123225 | -8.88851 | 6.19E-19 | 1.01E-17 | 2416.079 | 2151.328 | 2502.546 | 1209.813 | 1142.285 | 969.8052 |
| 21451 | CEND1     | 3.783169 | -1.09581 | 1.351319 | -0.81092 | 0.417411 | 0.517288 | 3.252518 | 7.663765 | 4.174388 | 4.464254 | 2.139111 | 1.004979 |
| 1239  | NT5DC2    | 1445.435 | -1.09608 | 0.109269 | -10.0311 | 1.11E-23 | 2.39E-22 | 1991.6   |          |          |          |          |          |



|       |           |          |          |          |          |          |          |          |          |          |          |          |          |
|-------|-----------|----------|----------|----------|----------|----------|----------|----------|----------|----------|----------|----------|----------|
| 9419  | LOC119620 | 56.57519 | -1.0981  | 0.36566  | -3.00306 | 0.002673 | 0.007544 | 74.26583 | 90.32295 | 66.79021 | 31.24978 | 40.6431  | 36.17926 |
| 7069  | CYBSR2    | 87.18273 | -1.09834 | 0.296478 | -3.70463 | 0.000212 | 0.000796 | 107.3331 | 135.7581 | 113.4042 | 53.57105 | 57.75599 | 55.27387 |
| 15656 | LOC103217 | 20.21326 | -1.09841 | 0.637193 | -1.72382 | 0.08474  | 0.143895 | 37.40396 | 15.32753 | 30.61218 | 11.16063 | 10.69555 | 16.07967 |
| 1174  | LOC103220 | 4143.767 | -1.09856 | 0.107081 | -10.2591 | 1.08E-24 | 2.44E-23 | 5246.312 | 5714.979 | 5977.028 | 2823.641 | 2735.923 | 2364.717 |
| 9924  | LOC119620 | 50.60701 | -1.09904 | 0.381716 | -2.87919 | 0.003987 | 0.01068  | 80.22878 | 60.2153  | 66.79021 | 29.01765 | 34.22577 | 33.16432 |
| 1297  | KIF18B    | 1227.186 | -1.09926 | 0.111381 | -9.86934 | 5.65E-23 | 1.16E-21 | 1630.054 | 1700.261 | 1693.41  | 716.5128 | 812.8621 | 810.0135 |
| 14814 | LOC103210 | 23.06136 | -1.09999 | 0.58826  | -1.86991 | 0.061496 | 0.110361 | 43.909   | 29.01283 | 22.2634  | 13.39276 | 10.69555 | 19.09461 |
| 9040  | LOC119620 | 60.40494 | -1.10055 | 0.354764 | -3.10219 | 0.001921 | 0.005649 | 74.26583 | 85.39624 | 86.27069 | 49.10679 | 34.22577 | 33.16432 |
| 12606 | LOC103230 | 38.22707 | -1.10099 | 0.482579 | -2.28146 | 0.022521 | 0.047495 | 55.29281 | 51.45671 | 47.30973 | 29.01765 | 34.22577 | 12.05975 |
| 742   | TNFAIP6   | 3475.069 | -1.1014  | 0.08794  | -12.5244 | 5.49E-36 | 1.97E-34 | 4678.747 | 4844.047 | 4694.795 | 2236.591 | 2254.623 | 2141.611 |
| 2608  | UVSSA     | 432.3905 | -1.10151 | 0.158157 | -6.96464 | 3.29E-12 | 3.36E-11 | 599.0054 | 626.7865 | 548.2363 | 263.391  | 252.4151 | 304.5088 |
| 941   | RHOBTB3   | 4452.388 | -1.10174 | 0.097824 | -11.2626 | 2.01E-29 | 5.67E-28 | 5918.499 | 6553.614 | 5756.481 | 2814.712 | 2695.279 | 2975.744 |
| 1592  | CLPTM1L   | 4465.305 | -1.10199 | 0.122483 | -8.99716 | 2.32E-19 | 3.87E-18 | 6860.103 | 5192.201 | 6230.274 | 2832.569 | 2622.55  | 3054.133 |
| 20711 | TRNAA-AG  | 4.552829 | -1.10218 | 1.200318 | -0.91824 | 0.358496 | 0.460171 | 7.589209 | 4.379295 | 6.957314 | 2.232127 | 2.139111 | 4.019918 |
| 22666 | TCEAL1    | 2.377506 | -1.10257 | 1.800441 | -0.61239 | 0.540281 | 0.633716 | 5.420864 | 2.737059 | 2.087194 | 0        | 0        | 4.019918 |
| 2507  | CHAC1     | 1072.843 | -1.10307 | 0.154895 | -7.1214  | 1.07E-12 | 1.13E-11 | 1650.653 | 1190.073 | 1553.568 | 738.834  | 590.3945 | 713.5354 |
| 2487  | LOC103230 | 948.2301 | -1.10321 | 0.154334 | -7.14821 | 8.79E-13 | 9.40E-12 | 1121.577 | 1579.83  | 1179.96  | 620.5313 | 592.5337 | 594.9478 |
| 10228 | LOC119620 | 56.51277 | -1.10396 | 0.393093 | -2.8084  | 0.004979 | 0.012941 | 78.06044 | 73.35318 | 77.92191 | 55.80317 | 27.80844 | 26.12947 |
| 6545  | LOC119620 | 213.3316 | -1.10423 | 0.281572 | -3.92166 | 8.79E-05 | 0.000357 | 359.9453 | 180.6459 | 330.4724 | 151.7846 | 147.5986 | 109.5428 |
| 1217  | CDK5RAP3  | 2492.189 | -1.1046  | 0.109294 | -10.1066 | 5.16E-24 | 1.13E-22 | 3378.282 | 3490.298 | 3347.859 | 1569.185 | 1411.813 | 1755.699 |
| 1108  | RPL19     | 57092.78 | -1.10532 | 0.105241 | -10.5027 | 8.39E-26 | 2.01E-24 | 82948.43 | 66897.01 | 84015.13 | 36421.62 | 35626.89 | 36647.58 |
| 9291  | LOC119620 | 58.41376 | -1.10559 | 0.364361 | -3.03432 | 0.002411 | 0.006898 | 79.6867  | 83.2066  | 74.44326 | 37.94616 | 47.06043 | 28.13943 |
| 1976  | SSRP1     | 10489.97 | -1.10582 | 0.137606 | -8.03612 | 9.27E-16 | 1.25E-14 | 12794.32 | 17818.25 | 12363.15 | 6636.114 | 6291.124 | 7036.866 |
| 17901 | LOC119620 | 10.18284 | -1.10591 | 0.812468 | -1.36117 | 0.173459 | 0.257617 | 15.17842 | 13.6853  | 13.2189  | 6.696381 | 4.278221 | 8.039836 |
| 2119  | LOC103220 | 78288.75 | -1.10645 | 0.142583 | -7.76004 | 8.49E-15 | 1.07E-13 | 122807   | 81017.5  | 116940.6 | 48510.82 | 46737.43 | 53719.17 |
| 3371  | GABBR2    | 562.373  | -1.10671 | 0.18545  | -5.9677  | 2.41E-09 | 1.90E-08 | 653.7562 | 980.4146 | 672.0765 | 345.9797 | 340.1186 | 381.8922 |
| 3022  | CWC27     | 1615.476 | -1.10764 | 0.173533 | -6.38289 | 1.74E-10 | 1.53E-09 | 1834.42  | 2929.748 | 1855.516 | 1082.582 | 977.5736 | 1013.019 |
| 6893  | LOC119620 | 181.4323 | -1.10779 | 0.293232 | -3.77786 | 0.000158 | 0.00061  | 176.1781 | 351.9858 | 214.2853 | 100.4457 | 141.1813 | 104.5179 |
| 2630  | LOC103240 | 501.2918 | -1.10782 | 0.159875 | -6.92927 | 4.23E-12 | 4.28E-11 | 736.6954 | 616.9331 | 706.8631 | 292.4086 | 293.0582 | 361.7926 |
| 792   | DDX52     | 3814.679 | -1.10858 | 0.091265 | -12.1468 | 5.96E-34 | 2.00E-32 | 5181.262 | 5488.898 | 4966.131 | 2368.287 | 2468.534 | 2414.966 |
| 937   | RPL10     | 53903.89 | -1.10863 | 0.098269 | -11.2816 | 1.62E-29 | 4.59E-28 | 77987.26 | 66885.51 | 76093.53 | 33879.22 | 31926.23 | 36651.6  |
| 23017 | TRNAK-CU  | 1.67326  | -1.10936 | 1.983224 | -0.55937 | 0.575909 | 0.665185 | 1.626259 | 1.094824 | 4.174388 | 0        | 2.139111 | 1.004979 |
| 2812  | FAM81A    | 448.0062 | -1.10953 | 0.166134 | -6.67851 | 2.41E-11 | 2.28E-10 | 561.6015 | 713.2776 | 562.8467 | 270.0874 | 288.7799 | 291.444  |
| 1584  | ABCC9     | 9694.744 | -1.10964 | 0.123009 | -9.02078 | 1.87E-19 | 3.13E-18 | 12199.11 | 15889.72 | 11660.46 | 6124.956 | 6047.266 | 6246.952 |
| 7108  | LOC103210 | 131.1779 | -1.10985 | 0.300429 | -3.69424 | 0.000221 | 0.000825 | 164.2522 | 192.689  | 176.7158 | 80.35657 | 119.7902 | 53.26391 |
| 4741  | LOC103230 | 1064.246 | -1.10986 | 0.228554 | -4.85603 | 1.20E-06 | 6.72E-06 | 1739.013 | 838.6349 | 1788.725 | 640.6204 | 626.7594 | 751.7246 |
| 1682  | CDC20     | 3216.091 | -1.11022 | 0.126524 | -8.77474 | 1.71E-18 | 2.71E-17 | 4788.791 | 3836.809 | 4569.564 | 2064.717 | 1775.462 | 2261.204 |
| 4912  | LOC119620 | 264.7162 | -1.11062 | 0.234427 | -4.73758 | 2.16E-06 | 1.17E-05 | 429.3324 | 264.3999 | 395.1754 | 142.8561 | 162.5724 | 193.961  |
| 3978  | LOC103220 | 1758.444 | -1.11094 | 0.206135 | -5.38941 | 7.07E-08 | 4.72E-07 | 2611.23  | 1499.908 | 3098.788 | 1232.134 | 1084.529 | 1024.074 |
| 15995 | CD8A      | 19.04983 | -1.11103 | 0.66671  | -1.66644 | 0.095625 | 0.158937 | 28.73058 | 25.72836 | 22.2634  | 11.16063 | 21.39111 | 5.024897 |
| 20549 | LOC119610 | 5.19378  | -1.1117  | 1.180255 | -0.94191 | 0.346238 | 0.447515 | 6.505036 | 8.211177 | 6.957314 | 4.464254 | 0        | 5.024897 |
| 2611  | LOC103220 | 6783.372 | -1.11173 | 0.159725 | -6.96024 | 3.40E-12 | 3.46E-11 | 10225.92 | 6605.618 | 10992.56 | 4528.986 | 4141.318 | 4205.839 |
| 1454  | PTCD2     | 1234.352 | -1.11193 | 0.118855 | -9.35536 | 8.33E-21 | 1.52E-19 | 1648.485 | 1847.515 | 1569.57  | 792.4051 | 740.1323 | 808.0035 |
| 1040  | SET       | 9593.705 | -1.11201 | 0.102818 | -10.8153 | 2.91E-27 | 7.45E-26 | 12617.06 | 14727.02 | 12013.89 | 6008.886 | 5908.224 | 6287.152 |
| 20877 | LOC119620 | 5.696719 | -1.1122  | 1.244325 | -0.89382 | 0.371419 | 0.472969 | 5.420864 | 2.737059 | 15.30609 | 6.696381 | 0        | 4.019918 |
| 2094  | ITPRIPL1  | 526.191  | -1.11247 | 0.14255  | -7.80408 | 5.99E-15 | 7.61E-14 | 693.3285 | 759.8076 | 707.5588 | 345.9797 | 303.7537 | 346.7179 |
| 2975  | FSD1      | 444.3062 | -1.11248 | 0.172301 | -6.45661 | 1.07E-10 | 9.57E-10 | 665.6821 | 509.093  | 645.6387 | 314.7299 | 267.3888 | 263.3046 |
| 1057  | RPL5      | 40089.25 | -1.11316 | 0.103964 | -10.7072 | 9.42E-27 | 2.37E-25 | 51607.71 | 55737.47 | 57135.55 | 26906.06 | 26984.88 | 22163.82 |
| 13636 | LOC103220 | 25.05178 | -1.11342 | 0.53487  | -2.08166 | 0.037374 | 0.072859 | 33.06727 | 32.84471 | 36.17803 | 22.32127 | 12.83466 | 13.06473 |
| 2138  | EMB       | 1581.541 | -1.11351 | 0.144345 | -7.71423 | 1.22E-14 | 1.51E-13 | 1883.75  | 2640.715 | 1963.354 | 1037.939 | 994.6865 | 968.8002 |
| 5041  | PIF1      | 372.1857 | -1.11353 | 0.23862  | -4.66654 | 3.06E-06 | 1.62E-05 | 591.9583 | 329.5419 | 608.7649 | 212.0521 | 222.4675 | 268.3295 |
| 7339  | LOC119620 | 96.48161 | -1.11366 | 0.307703 | -3.61926 | 0.000295 | 0.00107  | 106.2489 | 163.1287 | 125.9274 | 53.57105 | 72.72976 | 57.28383 |
| 4483  | FBXO36    | 187.7345 | -1.11439 | 0.221962 | -5.02063 | 5.15E-07 | 3.05E-06 | 262.9119 | 286.8438 | 220.5468 | 131.6955 | 104.8164 | 119.5926 |
| 8323  | DHRS2     | 65.85922 | -1.11463 | 0.336988 | -3.30762 | 0.000941 | 0.003005 | 99.20181 | 82.11177 | 89.74935 | 44.64254 | 34.22577 | 45.22408 |
| 1554  | BECN1     | 4232.389 | -1.11493 | 0.122871 | -9.07398 | 1.15E-19 | 1.96E-18 | 5188.309 | 6847.574 | 5339.738 | 2627.213 | 2609.715 | 2781.783 |
| 6929  | RPL18A    | 19706.43 | -1.115   | 0.296225 | -3.76402 | 0.000167 | 0.000642 | 33420.71 | 16503.37 | 30969.09 | 12133.84 | 11296.64 | 13914.95 |
| 892   | FANCI     | 2741.078 | -1.11501 | 0.096836 | -11.5145 | 1.12E-30 | 3.32E-29 | 3851.524 | 3886.076 | 3517.618 | 1698.649 | 1702.732 | 1789.868 |
| 10474 | LOC119620 | 48.99079 | -1.11568 | 0.405643 | -2.75039 | 0.005953 | 0.015109 | 81.31296 | 55.28859 | 64.00729 | 24.5534  | 40.6431  | 28.13943 |
| 2229  | LOC119620 | 11812.97 | -1.11583 | 0.14774  | -7.5527  | 4.26E-14 | 5.08E-13 | 18946.46 | 12247.79 | 17310.49 | 7066.914 | 7063.343 | 8242.842 |
| 991   | NCAPG     | 3601.296 | -1.11593 | 0.101227 | -11.0241 | 2.92E-28 | 7.85E-27 | 4736.209 | 5364.636 | 4690.621 | 2214.27  | 2201.145 | 2400.896 |
| 11026 | LOC119620 | 79.22246 | -1.11626 | 0.425414 | -2.62393 | 0.008692 | 0.020958 | 143.1108 | 48.17224 | 134.9719 | 46.87467 | 44.92132 | 57.28383 |
| 4273  | DIPK1A    | 175.92   | -1.11663 | 0.215728 | -5.17607 | 2.27E-07 | 1.41E-06 | 226.5921 | 262.7577 | 232.3743 | 118.3027 | 106.9555 | 108.5378 |
| 15980 | LOC119620 | 15.2925  | -1.11676 | 0.669249 | -1.66868 | 0.095181 | 0.158347 | 20.0572  | 20.80165 | 22.2634  | 11.16063 | 6.417332 | 11.05477 |
| 879   | RPL27A    | 40221.5  | -1.11698 | 0.096113 | -11.6215 | 3.20E-31 | 9.69E-30 | 53626.98 | 52561.93 | 58975.06 | 26301.15 | 26745.3  | 23118.55 |
| 775   | VIM       | 78005.32 | -1.11769 | 0.090993 | -12.2832 | 1.12E-34 | 3.82E-33 | 105089.9 | 114281   | 101025.1 | 48017.52 | 47086.1  | 52532.29 |
| 14051 | LOC103220 | 24.98672 | -1.11775 | 0.557477 | -2.00502 | 0.044961 | 0.085068 | 30.35684 | 40.50847 | 30.61218 | 24.5534  | 12.83466 | 11.05477 |
| 16559 | IL1RN     | 13.4471  | -1.1183  | 0.715024 | -1.564   | 0.117818 | 0.189153 | 20.59928 | 19.15941 | 15.30609 | 11.16063 | 6.417332 | 8.039836 |
| 14616 | APBA1     | 28.24909 | -1.11862 | 0.587373 | -1.90444 | 0.056853 | 0.10341  | 35.7777  | 39.96106 | 38.26523 | 33.4819  | 14.97377 | 7.034856 |
| 2407  | BOD1L1    | 6169.916 | -1.1198  | 0.154153 | -7.26424 | 3.75E-13 | 4.14E-12 | 7272.089 | 10961.92 | 7121.506 | 3660.688 | 3888.903 | 4114.386 |
| 6842  | LOC103230 | 94.57601 | -1.12022 | 0.294681 | -3.80146 | 0.000144 | 0.000559 | 125.222  | 132.4737 | 128.7103 | 55.80317 | 77.00798 | 48.23901 |
| 6902  | LOC119620 | 84.17977 | -1.12139 | 0.296976 | -3.77602 | 0.00     |          |          |          |          |          |          |          |



|       |           |          |          |          |          |          |          |          |          |          |          |          |           |
|-------|-----------|----------|----------|----------|----------|----------|----------|----------|----------|----------|----------|----------|-----------|
| 12316 | CISH      | 47.97425 | -1.12243 | 0.479167 | -2.34246 | 0.019157 | 0.041349 | 67.21871 | 82.11177 | 48.00546 | 11.16063 | 49.19955 | 30.14938  |
| 1045  | SEC14L1   | 5789.53  | -1.12263 | 0.103919 | -10.8029 | 3.33E-27 | 8.48E-26 | 7618.482 | 8331.608 | 7865.939 | 3551.314 | 3317.761 | 4052.077  |
| 4224  | LOC119620 | 206.9005 | -1.12305 | 0.215906 | -5.20158 | 1.98E-07 | 1.24E-06 | 331.2148 | 254.5465 | 262.9865 | 136.1597 | 136.9031 | 119.5926  |
| 10090 | LOC119620 | 49.28987 | -1.12309 | 0.395363 | -2.84065 | 0.004502 | 0.011864 | 65.05036 | 77.18507 | 61.22436 | 35.71403 | 21.39111 | 35.17428  |
| 3537  | LOC119620 | 231.2728 | -1.12317 | 0.193089 | -5.81683 | 6.00E-09 | 4.51E-08 | 339.3461 | 292.8653 | 317.9492 | 140.624  | 156.1551 | 140.6971  |
| 6601  | LOC119620 | 100.131  | -1.12338 | 0.287887 | -3.90216 | 9.53E-05 | 0.000384 | 146.9054 | 152.7279 | 112.7085 | 55.80317 | 66.31243 | 66.32864  |
| 1333  | SURF2     | 1364.249 | -1.124   | 0.115118 | -9.76393 | 1.61E-22 | 3.21E-21 | 1740.639 | 1971.23  | 1895.172 | 837.0476 | 928.374  | 813.0284  |
| 4397  | RCN3      | 332.3287 | -1.12438 | 0.221198 | -5.08316 | 3.71E-07 | 2.25E-06 | 385.9655 | 582.4462 | 402.1327 | 165.1774 | 216.0502 | 242.2001  |
| 18558 | THEGL     | 9.591804 | -1.12462 | 0.905484 | -1.24201 | 0.214234 | 0.306897 | 6.505036 | 18.612   | 14.61036 | 2.232127 | 8.556443 | 7.034856  |
| 4860  | LOC103230 | 197.0877 | -1.12519 | 0.235771 | -4.77236 | 1.82E-06 | 9.96E-06 | 294.895  | 205.2794 | 310.9919 | 120.5349 | 126.2075 | 124.6175  |
| 21420 | LOC119620 | 3.376436 | -1.1253  | 1.381178 | -0.81474 | 0.415221 | 0.515344 | 4.878777 | 2.737059 | 6.261582 | 2.232127 | 2.139111 | 2.009959  |
| 15823 | LOC103240 | 22.11796 | -1.12569 | 0.664083 | -1.69511 | 0.090055 | 0.151306 | 49.87195 | 13.13788 | 28.52499 | 13.39276 | 10.69555 | 17.08465  |
| 1148  | KIF14     | 2200.742 | -1.12571 | 0.109071 | -10.3208 | 5.67E-25 | 1.31E-23 | 2892.573 | 3349.613 | 2812.842 | 1363.83  | 1394.7   | 1390.892  |
| 13380 | CYP2D6    | 31.19884 | -1.12573 | 0.528313 | -2.1308  | 0.033106 | 0.065778 | 62.33993 | 32.2973  | 34.78657 | 13.39276 | 19.252   | 25.12449  |
| 1109  | CENPK     | 1902.32  | -1.12706 | 0.107349 | -10.499  | 8.73E-26 | 2.09E-24 | 2614.483 | 2420.108 | 2794.057 | 1151.778 | 1255.658 | 1177.836  |
| 16994 | FAM25G    | 11.83194 | -1.1283  | 0.755784 | -1.49288 | 0.135468 | 0.211923 | 13.55216 | 16.96977 | 18.08902 | 8.928508 | 6.417332 | 7.034856  |
| 1258  | PI4K2B    | 1172.05  | -1.1285  | 0.113056 | -9.98183 | 1.83E-23 | 3.87E-22 | 1675.047 | 1651.541 | 1497.91  | 723.2091 | 752.967  | 731.6251  |
| 4760  | PIGZ      | 144.651  | -1.13079 | 0.233767 | -4.83726 | 1.32E-06 | 7.35E-06 | 215.2083 | 191.5941 | 189.2389 | 95.98146 | 83.42532 | 92.45811  |
| 1532  | PWP2      | 3933.411 | -1.13082 | 0.12363  | -9.14679 | 5.86E-20 | 1.02E-18 | 6005.775 | 4753.177 | 5452.447 | 2283.466 | 2318.796 | 2786.808  |
| 18550 | LOC119620 | 9.952816 | -1.13123 | 0.909981 | -1.24313 | 0.213819 | 0.306446 | 15.7205  | 10.40082 | 13.91463 | 13.39276 | 4.278221 | 2.009959  |
| 1593  | MZT1      | 1121.205 | -1.13127 | 0.125738 | -8.99703 | 2.32E-19 | 3.87E-18 | 1615.417 | 1375.646 | 1623.141 | 716.5128 | 742.2714 | 654.2416  |
| 2522  | HAUS7     | 1289.559 | -1.13152 | 0.159537 | -7.09249 | 1.32E-12 | 1.39E-11 | 2082.696 | 1406.848 | 1827.686 | 812.4942 | 710.1847 | 897.4467  |
| 11890 | LOC119620 | 39.08451 | -1.1316  | 0.466136 | -2.42763 | 0.015198 | 0.033981 | 53.66655 | 39.41365 | 66.79021 | 22.32127 | 34.22577 | 18.08963  |
| 18130 | CYP2C19   | 9.219294 | -1.13184 | 0.860028 | -1.31605 | 0.188158 | 0.275906 | 11.9259  | 14.78012 | 11.82743 | 4.464254 | 4.278221 | 8.039836  |
| 1058  | N4BP2     | 2210.763 | -1.13206 | 0.105779 | -10.7021 | 9.95E-27 | 2.50E-25 | 2926.724 | 3327.169 | 2854.586 | 1363.83  | 1405.396 | 1386.872  |
| 2655  | LOC103230 | 1267.215 | -1.13219 | 0.164382 | -6.88755 | 5.68E-12 | 5.68E-11 | 1983.494 | 1330.211 | 1910.478 | 834.8155 | 693.0719 | 851.2176  |
| 17921 | CUNH1orf  | 11.04746 | -1.13227 | 0.834392 | -1.357   | 0.174782 | 0.259281 | 9.757555 | 21.89647 | 13.2189  | 6.696381 | 10.69555 | 4.019918  |
| 18282 | LOC119620 | 9.073637 | -1.13234 | 0.879826 | -1.28701 | 0.198092 | 0.288058 | 11.9259  | 8.211177 | 17.39328 | 4.464254 | 6.417332 | 6.029877  |
| 2124  | CHD5      | 641.9542 | -1.13239 | 0.146167 | -7.74728 | 9.39E-15 | 1.18E-13 | 840.776  | 910.3458 | 896.102  | 334.819  | 455.6306 | 414.0515  |
| 2226  | LOC103230 | 1393.604 | -1.13262 | 0.149855 | -7.55815 | 4.09E-14 | 4.88E-13 | 1663.121 | 2089.471 | 1982.834 | 841.5119 | 1046.025 | 738.6599  |
| 10521 | LOC103230 | 73.05446 | -1.13284 | 0.413516 | -2.73954 | 0.006153 | 0.015546 | 67.7608  | 154.3701 | 78.61764 | 60.26743 | 32.08666 | 45.22408  |
| 1021  | LOC103220 | 2915.338 | -1.13288 | 0.103852 | -10.9085 | 1.05E-27 | 2.73E-26 | 3744.191 | 4367.799 | 3904.444 | 1861.594 | 1732.68  | 1881.322  |
| 20494 | LOC103210 | 5.613365 | -1.13349 | 1.195699 | -0.94797 | 0.343143 | 0.445129 | 9.215468 | 6.568942 | 6.957314 | 8.928508 | 0        | 2.009959  |
| 16085 | PTPRR     | 15.98819 | -1.13367 | 0.687378 | -1.64927 | 0.090902 | 0.163778 | 19.51511 | 22.9913  | 22.2634  | 11.16063 | 14.97377 | 15.024891 |
| 3680  | LOC103220 | 255.7434 | -1.13373 | 0.199984 | -5.66911 | 1.44E-08 | 1.04E-07 | 373.4975 | 293.9601 | 386.8266 | 169.6417 | 149.7377 | 160.7967  |
| 1189  | PTGFRN    | 7417.228 | -1.13374 | 0.111403 | -10.1768 | 2.52E-24 | 5.63E-23 | 9915.302 | 11117.93 | 9548.913 | 4426.308 | 4258.969 | 5235.943  |
| 19612 | LOC119620 | 6.446793 | -1.13442 | 1.046623 | -1.08388 | 0.278417 | 0.377407 | 8.673382 | 10.94824 | 7.653045 | 2.232127 | 2.139111 | 7.034856  |
| 688   | PITRM1    | 8344.246 | -1.13479 | 0.088139 | -12.875  | 6.22E-38 | 2.40E-36 | 11106.27 | 12101.09 | 11199.19 | 5033.446 | 5157.396 | 5468.093  |
| 19392 | LOC103210 | 9.90353  | -1.13504 | 1.014643 | -1.11866 | 0.263284 | 0.360943 | 14.63633 | 15.32753 | 9.740239 | 11.16063 | 8.556443 | 0         |
| 17715 | LOC103210 | 10.71344 | -1.13512 | 0.821389 | -1.38195 | 0.166988 | 0.2506   | 15.17842 | 13.13788 | 16.00182 | 2.232127 | 10.69555 | 7.034856  |
| 1802  | NUDC      | 4050.162 | -1.13514 | 0.13451  | -8.43913 | 3.20E-17 | 4.72E-16 | 4865.225 | 6806.518 | 5028.746 | 2504.446 | 2459.977 | 2636.061  |
| 1521  | STXBP5L   | 1738.456 | -1.13589 | 0.123815 | -9.17407 | 4.55E-20 | 7.96E-19 | 2362.954 | 2668.085 | 2143.548 | 1011.154 | 1063.138 | 1181.856  |
| 7304  | LOC119620 | 85.63473 | -1.13687 | 0.312918 | -3.63312 | 0.00028  | 0.001019 | 107.3331 | 116.0513 | 129.406  | 40.17829 | 70.59065 | 50.24897  |
| 5376  | DNTT      | 152.8245 | -1.13693 | 0.253932 | -4.47733 | 7.56E-06 | 3.74E-05 | 196.7774 | 251.262  | 181.5859 | 80.35657 | 115.512  | 91.45313  |
| 2958  | H1-2      | 16914.23 | -1.13709 | 0.175467 | -6.48035 | 9.15E-11 | 8.22E-10 | 28408.04 | 15524.6  | 25835.98 | 10232.07 | 9908.361 | 11576.36  |
| 2247  | TAF1A     | 602.5439 | -1.13753 | 0.1514   | -7.51344 | 5.76E-14 | 6.81E-13 | 810.4191 | 939.9061 | 736.0838 | 348.2118 | 395.7355 | 384.9071  |
| 3583  | LOC103230 | 224.8409 | -1.13765 | 0.197173 | -5.76982 | 7.94E-09 | 5.89E-08 | 302.4842 | 297.2446 | 330.4724 | 122.767  | 143.3204 | 152.7569  |
| 4845  | LOC103240 | 196.9792 | -1.13849 | 0.237876 | -4.78605 | 1.70E-06 | 9.33E-06 | 303.0263 | 214.5854 | 293.5986 | 109.3742 | 149.7377 | 111.5527  |
| 3298  | LOC119610 | 439.6019 | -1.13855 | 0.188394 | -6.04344 | 1.51E-09 | 1.22E-08 | 633.699  | 478.9853 | 697.8186 | 279.0159 | 305.8928 | 242.2001  |
| 1600  | ADAT2     | 679.8686 | -1.13871 | 0.126785 | -8.98137 | 2.67E-19 | 4.44E-18 | 955.1562 | 908.7036 | 940.6288 | 410.7114 | 444.935  | 419.0764  |
| 20550 | LOC119610 | 4.477452 | -1.13911 | 1.208328 | -0.94272 | 0.345826 | 0.447515 | 5.420864 | 6.568942 | 6.261582 | 4.464254 | 2.139111 | 2.009959  |
| 1460  | ZFAND1    | 1702.201 | -1.13915 | 0.121923 | -9.34315 | 9.35E-21 | 1.70E-19 | 2260.5   | 2296.393 | 2462.193 | 982.1359 | 1232.128 | 979.855   |
| 12719 | TLX3      | 27.67158 | -1.13929 | 0.505466 | -2.25394 | 0.0242   | 0.050582 | 40.65648 | 39.41365 | 34.09084 | 13.39276 | 21.39111 | 17.08465  |
| 10656 | KCNJ12    | 44.40507 | -1.13996 | 0.421899 | -2.70198 | 0.006893 | 0.017196 | 65.05036 | 49.26706 | 67.48594 | 35.71403 | 27.80844 | 21.10457  |
| 15005 | LOC103210 | 20.80852 | -1.14011 | 0.621746 | -1.83372 | 0.066695 | 0.118206 | 34.69353 | 20.25424 | 32.00364 | 13.39276 | 6.417332 | 18.08963  |
| 21255 | LOC103210 | 3.980168 | -1.14032 | 1.355152 | -0.84147 | 0.400084 | 0.500407 | 7.589209 | 2.737059 | 6.261582 | 0        | 4.278221 | 3.014938  |
| 13797 | LOC119620 | 25.94547 | -1.14044 | 0.557047 | -2.04729 | 0.040629 | 0.078287 | 37.40396 | 45.98259 | 23.65487 | 11.16063 | 21.39111 | 16.07967  |
| 1628  | PPP2R2C   | 2292.182 | -1.14144 | 0.128175 | -8.90529 | 5.32E-19 | 8.69E-18 | 3021.589 | 3635.362 | 2812.842 | 1343.74  | 1364.753 | 1574.803  |
| 10325 | LOC103240 | 68.46938 | -1.14163 | 0.410254 | -2.78273 | 0.00539  | 0.013879 | 54.75072 | 139.0426 | 88.35788 | 42.41041 | 47.06043 | 39.1942   |
| 680   | DDIT3     | 3836.834 | -1.14322 | 0.088539 | -12.912  | 3.85E-38 | 1.51E-36 | 5336.84  | 5088.74  | 5421.139 | 2455.34  | 2323.074 | 2395.871  |
| 9008  | LOC103210 | 55.02943 | -1.14337 | 0.367271 | -3.11316 | 0.001851 | 0.005463 | 70.47123 | 82.65918 | 74.44326 | 26.78552 | 40.6431  | 35.17428  |
| 1010  | NSUN2     | 5621.909 | -1.14351 | 0.104404 | -10.9527 | 6.45E-28 | 1.70E-26 | 7447.183 | 8548.383 | 7232.128 | 3379.44  | 3362.682 | 3761.638  |
| 1309  | HDAC1     | 3583.824 | -1.14375 | 0.116414 | -9.8249  | 8.80E-23 | 1.79E-21 | 5320.036 | 4465.786 | 5019.702 | 2428.554 | 1959.425 | 2309.443  |
| 3623  | OIP5      | 400.5784 | -1.14392 | 0.20011  | -5.71645 | 1.09E-08 | 7.98E-08 | 593.0425 | 420.4123 | 642.1601 | 216.5163 | 278.0844 | 253.2548  |
| 1461  | GJC1      | 3569.942 | -1.14481 | 0.122547 | -9.34183 | 9.47E-21 | 1.72E-19 | 4610.987 | 5781.764 | 4358.061 | 2218.734 | 2164.78  | 2285.323  |
| 5160  | LOC119620 | 149.6971 | -1.14499 | 0.249032 | -4.59775 | 4.27E-06 | 2.20E-05 | 204.9086 | 235.9345 | 175.3243 | 91.51721 | 109.0946 | 81.40334  |
| 12222 | CUNH12orf | 36.38253 | -1.1452  | 0.484824 | -2.3621  | 0.018172 | 0.039527 | 62.33993 | 37.77142 | 48.7012  | 22.32127 | 32.08666 | 15.07469  |
| 4142  | LOC119620 | 285.0509 | -1.14524 | 0.217597 | -5.26313 | 1.42E-07 | 9.09E-07 | 431.5008 | 293.4127 | 452.9211 | 162.9453 | 194.6591 | 174.8664  |
| 758   | H1-4      | 17515.33 | -1.14531 | 0.092152 | -12.4285 | 1.83E-35 | 6.42E-34 | 24756    | 22294.99 | 25326.01 | 11191.88 | 10261.31 | 11261.8   |
| 1294  | CDR2L     | 1617.544 | -1.14554 | 0.116012 | -9.87435 | 5.38E-23 | 1.10E-21 | 2197.076 | 2273.401 | 2222.862 | 991.0644 | 896.287  |           |



|       |           |          |          |          |          |          |          |          |          |          |          |          |          |
|-------|-----------|----------|----------|----------|----------|----------|----------|----------|----------|----------|----------|----------|----------|
| 28494 | LOC119620 | 0.347866 | -1.14562 | 3.982907 | -0.28763 | 0.773627 | NA       | 0        | 0        | 2.087194 | 0        | 0        | 0        |
| 28702 | LOC119620 | 0.347866 | -1.14562 | 3.982907 | -0.28763 | 0.773627 | NA       | 0        | 0        | 2.087194 | 0        | 0        | 0        |
| 28944 | IFNL3     | 0.347866 | -1.14562 | 3.982907 | -0.28763 | 0.773627 | NA       | 0        | 0        | 2.087194 | 0        | 0        | 0        |
| 1122  | DOCK2     | 1847.545 | -1.14567 | 0.109878 | -10.4268 | 1.87E-25 | 4.43E-24 | 2472.998 | 2789.063 | 2375.227 | 1133.921 | 1125.172 | 1188.891 |
| 4421  | LOC10324  | 203.7621 | -1.14603 | 0.226321 | -5.06375 | 4.11E-07 | 2.47E-06 | 247.1914 | 343.7746 | 250.4633 | 122.767  | 134.764  | 123.6125 |
| 18020 | LOC10321  | 10.72405 | -1.1464  | 0.85577  | -1.33961 | 0.180373 | 0.266105 | 9.757555 | 22.9913  | 11.1317  | 11.16063 | 4.278221 | 5.024897 |
| 1670  | DPY19L3   | 732.3035 | -1.1465  | 0.130336 | -8.79654 | 1.41E-18 | 2.25E-17 | 1020.207 | 1077.854 | 929.4971 | 444.1933 | 457.7697 | 464.3005 |
| 12068 | LOC11962  | 60.03216 | -1.14676 | 0.479034 | -2.3939  | 0.01667  | 0.036723 | 113.2961 | 40.50847 | 96.70666 | 22.32127 | 32.08666 | 55.27387 |
| 7934  | LOC10322  | 104.4665 | -1.14697 | 0.33447  | -3.42922 | 0.000605 | 0.002028 | 108.4173 | 188.8571 | 131.4932 | 73.66019 | 79.14709 | 45.22408 |
| 18047 | LIN28B    | 11.0741  | -1.14719 | 0.859338 | -1.33498 | 0.181884 | 0.267934 | 15.17842 | 17.51718 | 12.52316 | 2.232127 | 14.97377 | 4.019918 |
| 1144  | CUNH11or  | 1737.911 | -1.14748 | 0.110959 | -10.3415 | 4.57E-25 | 1.06E-23 | 2397.106 | 2214.281 | 2567.944 | 1129.456 | 1101.642 | 1017.039 |
| 2066  | METTL2    | 450.6546 | -1.14757 | 0.14608  | -7.85574 | 3.97E-15 | 5.11E-14 | 638.5777 | 621.8598 | 603.8948 | 263.391  | 288.7799 | 287.4241 |
| 1359  | LOC10322  | 15996.49 | -1.14792 | 0.118459 | -9.69046 | 3.31E-22 | 6.48E-21 | 23264.18 | 18169.15 | 24700.55 | 9964.215 | 10043.12 | 9837.744 |
| 19763 | SLC16A12  | 6.716072 | -1.14793 | 1.083587 | -1.05938 | 0.289425 | 0.389331 | 3.794605 | 8.211177 | 15.30609 | 6.696381 | 4.278221 | 2.009959 |
| 1034  | RCN2      | 3193.43  | -1.14799 | 0.105992 | -10.8309 | 2.46E-27 | 6.32E-26 | 4229.9   | 4472.355 | 4493.033 | 1921.861 | 2220.397 | 1823.033 |
| 7071  | LOC10323  | 189.8819 | -1.14804 | 0.309947 | -3.70399 | 0.000212 | 0.000798 | 334.4673 | 148.896  | 304.0346 | 116.0706 | 94.12087 | 141.7021 |
| 738   | SLC25A39  | 11948.49 | -1.14833 | 0.091518 | -12.5476 | 4.10E-36 | 1.48E-34 | 15967.15 | 17360.62 | 16083.92 | 7374.948 | 6964.944 | 7939.338 |
| 3602  | TMEM126   | 830.6008 | -1.14841 | 0.200089 | -5.73946 | 9.50E-09 | 7.01E-08 | 1335.159 | 777.8722 | 1323.281 | 446.4254 | 556.1688 | 544.6989 |
| 1329  | ZDBF2     | 1589.38  | -1.14875 | 0.11755  | -9.77248 | 1.48E-22 | 2.96E-21 | 2064.807 | 2442.004 | 2064.235 | 948.654  | 1041.747 | 974.8301 |
| 827   | TBCCD1    | 2146.771 | -1.14877 | 0.096589 | -11.8934 | 1.28E-32 | 4.12E-31 | 2942.445 | 3075.907 | 2861.543 | 1303.562 | 1328.388 | 1368.782 |
| 18340 | LOC11962  | 9.524913 | -1.14945 | 0.900555 | -1.27638 | 0.201822 | 0.292553 | 15.17842 | 8.211177 | 15.30609 | 11.16063 | 4.278221 | 3.014938 |
| 891   | WDR45B    | 5676.036 | -1.14981 | 0.099841 | -11.5164 | 1.09E-30 | 3.26E-29 | 7428.752 | 8691.805 | 7355.968 | 3526.761 | 3495.307 | 3557.627 |
| 3795  | LOC10323  | 244.3698 | -1.15024 | 0.207205 | -5.5512  | 2.84E-08 | 1.99E-07 | 327.4202 | 313.1196 | 365.259  | 174.1059 | 164.7115 | 121.6025 |
| 16593 | LOC11962  | 12.5463  | -1.15025 | 0.738173 | -1.55824 | 0.119175 | 0.190934 | 19.51511 | 13.6853  | 18.78475 | 6.696381 | 8.556443 | 8.039836 |
| 1761  | GALNT7    | 1222.548 | -1.15053 | 0.134284 | -8.56792 | 1.05E-17 | 1.59E-16 | 1547.114 | 1965.208 | 1546.611 | 727.6734 | 765.8016 | 782.879  |
| 1756  | ERAL1     | 1038.247 | -1.15114 | 0.134132 | -8.58214 | 9.31E-18 | 1.41E-16 | 1440.323 | 1425.46  | 1440.164 | 584.8173 | 583.9772 | 754.7396 |
| 1071  | CA5B      | 1566.993 | -1.15119 | 0.108144 | -10.645  | 1.84E-26 | 4.57E-25 | 2078.901 | 2323.216 | 2079.541 | 950.8861 | 1009.66  | 959.7554 |
| 2186  | CACNA2D4  | 484.3693 | -1.15144 | 0.150808 | -7.63515 | 2.26E-14 | 2.74E-13 | 634.7831 | 653.6097 | 717.299  | 267.8552 | 325.1448 | 307.5237 |
| 12657 | LOC11962  | 30.75608 | -1.15188 | 0.50764  | -2.26909 | 0.023263 | 0.048862 | 47.7036  | 27.918   | 51.48412 | 20.08914 | 19.252   | 18.08963 |
| 17370 | TRNAA-UG  | 12.35936 | -1.15216 | 0.802403 | -1.43589 | 0.151033 | 0.231158 | 17.34676 | 12.04306 | 22.95914 | 4.464254 | 4.278221 | 13.06473 |
| 1549  | TBC1D16   | 1765.172 | -1.15222 | 0.126776 | -9.08861 | 1.00E-19 | 1.72E-18 | 2602.015 | 2137.643 | 2572.815 | 1040.171 | 1020.356 | 1218.035 |
| 858   | PAPPA     | 4957.037 | -1.15242 | 0.098202 | -11.7352 | 8.41E-32 | 2.61E-30 | 6503.952 | 7371.447 | 6643.539 | 3116.049 | 2879.243 | 3227.994 |
| 2437  | ZDHHC18   | 912.6124 | -1.15274 | 0.159781 | -7.2145  | 5.41E-13 | 5.91E-12 | 1374.189 | 1075.117 | 1334.413 | 573.6566 | 462.0479 | 656.2516 |
| 8751  | LOC10322  | 79.80576 | -1.15297 | 0.361596 | -3.18855 | 0.00143  | 0.004344 | 88.36008 | 151.0857 | 89.05362 | 49.10679 | 62.3421  | 39.1902  |
| 9375  | LOC10323  | 94.592   | -1.15329 | 0.382716 | -3.01344 | 0.002583 | 0.007325 | 175.636  | 66.23683 | 148.8865 | 62.49956 | 62.03421 | 52.25893 |
| 2940  | LOC10324  | 717.3141 | -1.15332 | 0.177494 | -6.49778 | 8.15E-11 | 7.37E-10 | 844.5706 | 1265.069 | 857.8368 | 441.9611 | 466.3261 | 428.1213 |
| 13016 | LOC10322  | 27.2793  | -1.15344 | 0.524092 | -2.20084 | 0.027747 | 0.056672 | 42.82482 | 33.93953 | 37.56949 | 13.39276 | 12.83466 | 23.11453 |
| 1752  | LOC10324  | 1551.953 | -1.15459 | 0.134416 | -8.5897  | 8.72E-18 | 1.32E-16 | 1921.696 | 2527.948 | 1977.964 | 968.7431 | 913.4003 | 1001.965 |
| 11566 | LOC11962  | 34.95544 | -1.15466 | 0.461485 | -2.50205 | 0.012348 | 0.028382 | 53.12446 | 47.07742 | 43.13534 | 26.78552 | 23.53022 | 16.07967 |
| 18039 | LOC11962  | 9.681551 | -1.15478 | 0.863911 | -1.33669 | 0.181324 | 0.267228 | 13.01007 | 8.758589 | 18.08902 | 8.928508 | 4.278221 | 5.024897 |
| 1259  | DBF4      | 1800.526 | -1.1548  | 0.115703 | -9.98074 | 1.85E-23 | 3.91E-22 | 2304.409 | 2763.882 | 2385.663 | 1066.957 | 1180.789 | 1101.457 |
| 6951  | LOC10321  | 187.669  | -1.15555 | 0.307718 | -3.75523 | 0.000173 | 0.000662 | 325.7939 | 143.4219 | 308.209  | 129.4634 | 100.5382 | 118.5876 |
| 2835  | LOC10323  | 454.6979 | -1.15564 | 0.174182 | -6.6347  | 3.25E-11 | 3.05E-10 | 546.9651 | 705.0664 | 625.4625 | 301.3371 | 310.171  | 239.1851 |
| 18871 | LOC11962  | 8.545981 | -1.15592 | 0.95646  | -1.20854 | 0.22684  | 0.319566 | 4.336691 | 16.42235 | 14.61036 | 4.464254 | 6.417332 | 5.024897 |
| 6289  | LOC11962  | 141.8869 | -1.15609 | 0.286598 | -4.03385 | 5.49E-05 | 0.000232 | 248.2756 | 159.2968 | 176.7158 | 93.74933 | 106.9555 | 66.32864 |
| 6837  | LOC10322  | 88.76044 | -1.15619 | 0.304048 | -3.80267 | 0.000143 | 0.000557 | 112.2119 | 137.4004 | 120.3615 | 51.33892 | 44.92132 | 66.32864 |
| 17512 | LOC11962  | 10.72063 | -1.15667 | 0.818922 | -1.41244 | 0.157822 | 0.239589 | 17.34676 | 9.306001 | 17.39328 | 6.696381 | 8.556443 | 5.024897 |
| 1331  | PRKCA     | 4990.731 | -1.15704 | 0.118439 | -9.76903 | 1.53E-22 | 3.05E-21 | 6322.895 | 8021.773 | 6333.243 | 2921.854 | 3082.458 | 3262.163 |
| 1030  | MED24     | 2384.535 | -1.15749 | 0.106536 | -10.8647 | 1.70E-27 | 4.38E-26 | 3340.336 | 3224.803 | 3324.204 | 1350.437 | 1435.343 | 1632.087 |
| 20049 | LOC11962  | 6.302377 | -1.1576  | 1.134144 | -1.02068 | 0.307404 | 0.407618 | 14.63633 | 5.474118 | 6.261582 | 0        | 6.417332 | 5.024897 |
| 5886  | PRSS12    | 125.7581 | -1.15787 | 0.274285 | -4.2214  | 2.43E-05 | 0.00011  | 158.2892 | 212.3958 | 148.1908 | 87.05295 | 81.28621 | 67.33362 |
| 12065 | RPS29     | 7367.461 | -1.15827 | 0.483755 | -2.39433 | 0.016651 | 0.036689 | 13997.21 | 4384.221 | 12146.08 | 4524.521 | 4267.526 | 4885.205 |
| 1559  | RND3      | 1495.798 | -1.15856 | 0.127814 | -9.06439 | 1.25E-19 | 2.14E-18 | 1959.642 | 2378.504 | 1856.907 | 959.8146 | 930.5131 | 889.4068 |
| 12938 | LOC11962  | 40.95641 | -1.15868 | 0.523028 | -2.21533 | 0.026738 | 0.054941 | 63.96619 | 26.82318 | 78.61764 | 17.85702 | 36.36488 | 22.10955 |
| 1437  | RNF144A   | 1050.247 | -1.15882 | 0.123072 | -9.41577 | 4.70E-21 | 8.69E-20 | 1408.34  | 1562.861 | 1386.593 | 598.21   | 646.0114 | 699.4657 |
| 5687  | ANKRD61   | 138.6894 | -1.15916 | 0.267557 | -4.3324  | 1.47E-05 | 6.89E-05 | 171.2993 | 231.5552 | 169.7585 | 107.1421 | 77.00798 | 75.37346 |
| 1849  | LOC10321  | 699.6538 | -1.15984 | 0.139537 | -8.31203 | 9.41E-17 | 1.35E-15 | 1025.627 | 917.4622 | 961.5008 | 448.6575 | 374.3444 | 470.3304 |
| 15391 | BMP5      | 16.03126 | -1.15995 | 0.658544 | -1.76139 | 0.078173 | 0.135029 | 24.39389 | 24.63353 | 17.39328 | 11.16063 | 8.556443 | 10.04979 |
| 6549  | LOC10321  | 105.0293 | -1.16026 | 0.296013 | -3.91962 | 8.87E-05 | 0.00036  | 169.673  | 111.672  | 154.4524 | 71.42806 | 55.61688 | 67.33362 |
| 797   | IMPDPH2   | 9139.9   | -1.16031 | 0.095922 | -12.0964 | 1.10E-33 | 3.68E-32 | 13080    | 12318.41 | 12501.6  | 5401.747 | 5317.829 | 6219.818 |
| 3309  | RANGRF    | 610.1775 | -1.16049 | 0.192343 | -6.03344 | 1.61E-09 | 1.29E-08 | 916.126  | 687.0018 | 928.1056 | 450.8897 | 275.9453 | 402.9968 |
| 10100 | LOC10322  | 57.8851  | -1.16103 | 0.408976 | -2.83886 | 0.004527 | 0.011917 | 97.03346 | 48.71965 | 94.61947 | 31.24978 | 38.50399 | 37.18424 |
| 10429 | LOC11961  | 76.51393 | -1.16171 | 0.420791 | -2.76078 | 0.005766 | 0.014699 | 85.10756 | 165.3184 | 67.48594 | 29.01765 | 59.8951  | 52.25893 |
| 5571  | LOC10324  | 108.4019 | -1.16178 | 0.264948 | -4.38494 | 1.16E-05 | 5.54E-05 | 151.7842 | 160.3917 | 137.7548 | 66.96381 | 64.17332 | 69.34358 |
| 1516  | CHMP4C    | 770.1462 | -1.16202 | 0.126339 | -9.19766 | 3.66E-20 | 6.42E-19 | 1020.749 | 1126.574 | 1042.901 | 482.1394 | 496.2737 | 452.2408 |
| 11257 | GPR132    | 38.58    | -1.1629  | 0.452748 | -2.56854 | 0.010213 | 0.024119 | 65.05036 | 41.6033  | 53.57132 | 29.01765 | 17.11289 | 25.12449 |
| 6734  | LOC11962  | 112.8176 | -1.16303 | 0.302647 | -3.84287 | 0.000122 | 0.00048  | 134.4374 | 197.0683 | 133.5804 | 84.82083 | 72.72976 | 54.26889 |
| 2658  | CRABP1    | 327.7807 | -1.16319 | 0.169029 | -6.88163 | 5.92E-12 | 5.92E-11 | 441.8004 | 488.2913 | 428.5705 | 216.5163 | 192.52   | 198.9859 |
| 712   | MYO1D     | 10837.61 | -1.16533 | 0.091551 | -12.7288 | 4.09E-37 | 1.53E-35 | 14745.83 | 15756.7  | 14480.95 | 6486.561 | 6365.993 | 7189.623 |
| 16508 | LOC11961  | 14.04979 | -1.16536 | 0.74049  | -1.57377 | 0.115541 | 0.18607  | 26.56223 | 13.6853  | 18.78475 | 8.928508 | 4.278221 | 12.05975 |
| 994   | DEPDC1    | 3114.68  | -1.16567 | 0.105941 | -11.003  | 3.70E-28 | 9.89E-27 | 4081.368 | 4766.315 | 4074.203 | 1921.861 | 2002.208 | 1842.127 |



|       |           |          |          |          |          |          |          |          |          |          |          |          |          |
|-------|-----------|----------|----------|----------|----------|----------|----------|----------|----------|----------|----------|----------|----------|
| 19416 | LOC103221 | 6.56773  | -1.16819 | 1.047143 | -1.1156  | 0.264593 | 0.36229  | 10.29964 | 6.568942 | 11.1317  | 2.232127 | 2.139111 | 7.034856 |
| 8501  | CUNH4orf4 | 89.26493 | -1.1685  | 0.358835 | -3.25638 | 0.001128 | 0.003529 | 149.0738 | 74.99542 | 145.4079 | 53.57105 | 66.31243 | 46.22906 |
| 22720 | LOC119624 | 1.71328  | -1.16852 | 1.930363 | -0.60534 | 0.544954 | 0.63763  | 2.710432 | 1.642235 | 2.782925 | 0        | 2.139111 | 1.004979 |
| 2910  | LOC119623 | 384.9329 | -1.16885 | 0.17884  | -6.53574 | 6.33E-11 | 5.78E-10 | 577.322  | 464.7526 | 552.4107 | 232.1412 | 275.9453 | 207.0258 |
| 14248 | TRNAD-GU  | 20.34432 | -1.16921 | 0.594035 | -1.96825 | 0.049039 | 0.091495 | 22.22554 | 32.2973  | 30.61218 | 11.16063 | 10.69555 | 15.07469 |
| 7383  | LOC119620 | 73.49515 | -1.16928 | 0.324205 | -3.60662 | 0.00031  | 0.001117 | 105.7068 | 106.7453 | 94.61947 | 35.71403 | 44.92132 | 53.26391 |
| 4713  | ARHGAP27  | 140.0818 | -1.16967 | 0.23983  | -4.87707 | 1.08E-06 | 6.07E-06 | 187.5619 | 188.8571 | 203.1536 | 89.28508 | 96.25998 | 75.37346 |
| 2212  | LOC103211 | 447.5295 | -1.17023 | 0.154343 | -7.58202 | 3.40E-14 | 4.09E-13 | 588.7058 | 605.9849 | 660.2491 | 287.9444 | 293.0582 | 249.2349 |
| 16855 | LOC103231 | 12.75472 | -1.17026 | 0.77253  | -1.51484 | 0.129812 | 0.204759 | 22.76763 | 20.25424 | 10.43597 | 4.464254 | 8.556443 | 10.04979 |
| 13311 | TMEM150   | 35.02988 | -1.17048 | 0.545743 | -2.14474 | 0.031974 | 0.063858 | 46.07734 | 53.09895 | 45.22254 | 8.928508 | 42.78221 | 14.06971 |
| 646   | UHRF1     | 5816.536 | -1.17095 | 0.088905 | -13.1709 | 1.29E-39 | 5.31E-38 | 8035.346 | 8136.182 | 8004.389 | 3392.833 | 3514.559 | 3815.907 |
| 10623 | LOC103218 | 39.56227 | -1.17098 | 0.431554 | -2.7134  | 0.00666  | 0.016666 | 62.33993 | 45.43518 | 56.35424 | 22.32127 | 27.80844 | 23.11453 |
| 12258 | LOC119627 | 37.19686 | -1.17196 | 0.497848 | -2.35405 | 0.01857  | 0.040274 | 34.69353 | 76.63765 | 42.43961 | 26.78552 | 23.53022 | 19.09461 |
| 834   | RBFox2    | 13524.07 | -1.17215 | 0.098896 | -11.8524 | 2.09E-32 | 6.67E-31 | 18294.33 | 20356.6  | 17561.65 | 7917.354 | 8025.943 | 8988.536 |
| 16995 | LOC103220 | 12.19755 | -1.17216 | 0.785246 | -1.49273 | 0.135508 | 0.211972 | 11.38381 | 25.72836 | 13.91463 | 6.696381 | 6.417332 | 9.044815 |
| 1361  | JMY       | 1830.004 | -1.17246 | 0.121098 | -9.68195 | 3.60E-22 | 7.03E-21 | 2343.981 | 2905.114 | 2357.834 | 1122.76  | 1101.642 | 1148.692 |
| 1777  | LOC103221 | 1854.238 | -1.17251 | 0.137651 | -8.51794 | 1.62E-17 | 2.43E-16 | 2828.065 | 2068.669 | 2808.668 | 1169.635 | 1135.868 | 1114.522 |
| 2241  | NPM3      | 4106.579 | -1.17258 | 0.155757 | -7.52822 | 5.14E-14 | 6.10E-13 | 6263.808 | 4147.192 | 6655.366 | 2575.875 | 2571.211 | 2426.02  |
| 2127  | CRLF1     | 669.9478 | -1.17302 | 0.151568 | -7.73925 | 1.00E-14 | 1.25E-13 | 1010.449 | 788.8204 | 988.6343 | 410.7114 | 382.9008 | 438.171  |
| 19249 | LOC119620 | 7.791761 | -1.17308 | 1.024493 | -1.14504 | 0.252194 | 0.348308 | 7.589209 | 15.87494 | 8.348776 | 2.232127 | 10.69555 | 2.009959 |
| 919   | PTRH2     | 1592.289 | -1.17336 | 0.102925 | -11.4001 | 4.18E-30 | 1.21E-28 | 2124.979 | 2285.444 | 2204.773 | 1004.457 | 990.4082 | 943.6757 |
| 7600  | LOC119625 | 100.4378 | -1.17353 | 0.332822 | -3.526   | 0.000422 | 0.001476 | 161.5417 | 102.9134 | 150.278  | 87.05295 | 55.61688 | 45.22408 |
| 2137  | LOC103214 | 15514.8  | -1.17362 | 0.152113 | -7.71544 | 1.21E-14 | 1.50E-13 | 24686.07 | 15573.32 | 24239.28 | 9642.789 | 9112.611 | 9834.729 |
| 3953  | PAR6G     | 188.989  | -1.17374 | 0.217043 | -5.40788 | 6.38E-08 | 4.29E-07 | 256.9489 | 271.5163 | 254.6377 | 107.1421 | 141.1813 | 102.5079 |
| 5011  | LOC119625 | 172.6298 | -1.17383 | 0.250762 | -4.68105 | 2.85E-06 | 1.51E-05 | 270.5011 | 226.6285 | 217.0682 | 95.98146 | 141.1813 | 84.41828 |
| 18979 | LOC103231 | 7.633516 | -1.17416 | 0.98756  | -1.18895 | 0.234461 | 0.328423 | 13.55216 | 13.13788 | 5.565851 | 2.232127 | 4.278221 | 7.034856 |
| 1242  | ZRANB3    | 1175.718 | -1.17431 | 0.117095 | -10.0287 | 1.14E-23 | 2.44E-22 | 1659.326 | 1700.261 | 1527.826 | 776.7802 | 669.5416 | 720.5703 |
| 4799  | LOC103231 | 360.5062 | -1.17432 | 0.243918 | -4.81442 | 1.48E-06 | 8.18E-06 | 652.672  | 331.7316 | 517.6241 | 191.9629 | 211.772  | 257.2747 |
| 17473 | LOC119627 | 10.86206 | -1.17499 | 0.830104 | -1.41548 | 0.156929 | 0.23877  | 11.38381 | 20.80165 | 12.52316 | 11.16063 | 4.278221 | 5.024897 |
| 2738  | CUNH17orf | 365.8464 | -1.17629 | 0.173124 | -6.79448 | 1.09E-11 | 1.06E-10 | 565.9382 | 457.6363 | 495.3607 | 220.9806 | 248.1368 | 207.0258 |
| 1408  | SMAD7     | 1228.951 | -1.17679 | 0.123877 | -9.49965 | 2.11E-21 | 3.98E-20 | 1722.75  | 1802.08  | 1584.876 | 845.9761 | 682.3763 | 735.645  |
| 23830 | LOC119625 | 0.826426 | -1.17688 | 2.715909 | -0.43333 | 0.664776 | 0.741631 | 2.710432 | 0.547412 | 0.695731 | 0        | 0        | 1.004979 |
| 18082 | LOC119615 | 9.24792  | -1.17818 | 0.88902  | -1.32526 | 0.185086 | 0.272123 | 7.589209 | 19.15941 | 11.82743 | 4.464254 | 6.417332 | 6.029877 |
| 4919  | LOC119627 | 143.7468 | -1.17823 | 0.248901 | -4.73373 | 2.20E-06 | 1.19E-05 | 222.7975 | 204.1846 | 172.5414 | 93.74933 | 72.72976 | 96.47803 |
| 16265 | LOC103211 | 14.89413 | -1.17935 | 0.730484 | -1.61448 | 0.106423 | 0.173947 | 28.73058 | 11.49565 | 21.56767 | 6.696381 | 12.83466 | 8.039836 |
| 3945  | LOC103241 | 184.0906 | -1.17936 | 0.217969 | -5.41069 | 6.28E-08 | 4.23E-07 | 269.4169 | 251.262  | 246.2889 | 91.51721 | 130.4858 | 115.5726 |
| 4349  | LOC119627 | 438.4817 | -1.17936 | 0.230395 | -5.11887 | 3.07E-07 | 1.88E-06 | 744.8267 | 393.5891 | 686.6869 | 296.8729 | 239.5804 | 269.3345 |
| 960   | SPAG5     | 5101.149 | -1.17978 | 0.105708 | -11.1608 | 6.35E-29 | 1.76E-27 | 7443.93  | 6965.268 | 6836.952 | 2892.837 | 2960.529 | 3507.378 |
| 5251  | LOC119624 | 134.751  | -1.1802  | 0.259234 | -4.55264 | 5.30E-06 | 2.68E-05 | 174.5518 | 226.0811 | 160.7139 | 82.5887  | 79.14709 | 85.42325 |
| 3129  | LOC103221 | 3121.87  | -1.18037 | 0.188999 | -6.24541 | 4.23E-10 | 3.59E-09 | 5053.329 | 2774.283 | 5168.588 | 2044.628 | 1816.105 | 1874.287 |
| 4854  | LOC119627 | 144.9776 | -1.18124 | 0.247209 | -4.77832 | 1.77E-06 | 9.68E-06 | 190.8144 | 222.2492 | 193.4133 | 89.28508 | 70.59065 | 103.5129 |
| 1196  | ZNFX18B   | 2114.01  | -1.18138 | 0.11629  | -10.1589 | 3.02E-24 | 6.72E-23 | 2771.688 | 3297.061 | 2735.616 | 1341.508 | 1208.598 | 1329.588 |
| 1666  | RNA5H2B   | 1033.512 | -1.18143 | 0.134176 | -8.80507 | 1.31E-18 | 2.09E-17 | 1483.148 | 1262.332 | 1552.872 | 685.263  | 639.5941 | 577.8632 |
| 23768 | LOC119618 | 0.829088 | -1.18196 | 2.671135 | -0.44249 | 0.658132 | 0.736134 | 1.084173 | 2.189647 | 0.695731 | 0        | 0        | 1.004979 |
| 14194 | VEGFD     | 36.04474 | -1.18236 | 0.597682 | -1.97824 | 0.047902 | 0.089719 | 58.54533 | 47.07742 | 44.52681 | 2.232127 | 42.78221 | 21.10457 |
| 5090  | LOC119620 | 120.8864 | -1.18237 | 0.254883 | -4.63888 | 3.50E-06 | 1.83E-05 | 174.0097 | 154.9175 | 176.02   | 73.66019 | 66.31243 | 80.39836 |
| 5868  | LOC119625 | 151.0185 | -1.18243 | 0.279314 | -4.23333 | 2.30E-05 | 0.000104 | 253.6964 | 145.6115 | 228.8956 | 104.91   | 85.56443 | 87.43321 |
| 2104  | LOC103221 | 3159.101 | -1.18262 | 0.151742 | -7.79359 | 6.51E-15 | 8.23E-14 | 4719.404 | 3329.906 | 5104.581 | 2031.236 | 2010.764 | 1758.714 |
| 9821  | LOC119620 | 51.03933 | -1.18376 | 0.408133 | -2.90042 | 0.003727 | 0.010088 | 78.06044 | 74.44801 | 62.61582 | 20.08914 | 27.80844 | 43.21412 |
| 2292  | DTYMK     | 1039.428 | -1.18517 | 0.159425 | -7.43398 | 1.05E-13 | 1.22E-12 | 1620.296 | 1117.268 | 1596.703 | 609.3707 | 624.6203 | 668.3113 |
| 2580  | LOC119625 | 2877.129 | -1.1856  | 0.169123 | -7.01029 | 2.38E-12 | 2.45E-11 | 4838.121 | 2819.171 | 4336.494 | 1716.506 | 1679.202 | 1873.282 |
| 2634  | LOC103220 | 478.2221 | -1.18589 | 0.171351 | -6.92081 | 4.49E-12 | 4.53E-11 | 706.8806 | 541.3903 | 744.4326 | 303.5693 | 286.6408 | 286.4191 |
| 1530  | TMEM209   | 1775.069 | -1.18597 | 0.129532 | -9.15575 | 5.40E-20 | 9.38E-19 | 2255.621 | 2891.977 | 2249.995 | 1129.456 | 1046.025 | 1077.338 |
| 2943  | LOC103241 | 280.2765 | -1.18612 | 0.182638 | -6.49439 | 8.34E-11 | 7.53E-10 | 419.0328 | 366.2185 | 379.8693 | 187.4987 | 173.268  | 155.7718 |
| 8063  | LOC119625 | 87.40637 | -1.18755 | 0.349744 | -3.3955  | 0.000685 | 0.002259 | 121.4273 | 146.7064 | 97.40239 | 29.01765 | 70.59065 | 59.29379 |
| 14865 | LOC119615 | 17.35687 | -1.18793 | 0.638675 | -1.85999 | 0.062886 | 0.112476 | 29.27266 | 18.612   | 24.3506  | 11.16063 | 10.69555 | 10.04979 |
| 5051  | HTR1D     | 146.1995 | -1.18798 | 0.254946 | -4.65972 | 3.17E-06 | 1.67E-05 | 177.8043 | 242.5034 | 188.5432 | 104.91   | 77.00798 | 86.42823 |
| 675   | NOL11     | 4103.965 | -1.18807 | 0.091599 | -12.9704 | 1.80E-38 | 7.10E-37 | 5582.405 | 5971.715 | 5565.155 | 2468.732 | 2410.778 | 2625.006 |
| 1263  | QKI       | 16750.52 | -1.18829 | 0.119344 | -9.95685 | 2.35E-23 | 4.95E-22 | 21364.71 | 27535.36 | 20955.43 | 9883.858 | 9901.943 | 10861.82 |
| 670   | CHRD1     | 9044.425 | -1.18831 | 0.091381 | -13.0039 | 1.16E-38 | 4.62E-37 | 12729.27 | 13025.66 | 11970.75 | 5283.445 | 5337.081 | 5920.334 |
| 1694  | CUNH17orf | 1151.344 | -1.18848 | 0.135928 | -8.74347 | 2.26E-18 | 3.55E-17 | 1784.548 | 1377.288 | 1644.013 | 687.4951 | 660.9852 | 753.7346 |
| 23880 | USP51     | 1.095691 | -1.18864 | 2.789184 | -0.42616 | 0.66999  | 0.745883 | 3.794605 | 0.547412 | 0        | 2.232127 | 0        | 0        |
| 2826  | TMEM234   | 333.8033 | -1.18866 | 0.178615 | -6.65486 | 2.84E-11 | 2.67E-10 | 522.0292 | 416.5804 | 456.3998 | 194.195  | 192.52   | 221.0955 |
| 1717  | BMPR2     | 11323.12 | -1.18879 | 0.136845 | -8.68716 | 3.72E-18 | 5.75E-17 | 13388.99 | 19582.02 | 14254.84 | 6729.863 | 6753.172 | 7229.822 |
| 7528  | LOC119627 | 84.01489 | -1.18886 | 0.334928 | -3.5496  | 0.000386 | 0.001362 | 114.3802 | 143.9693 | 89.74935 | 58.0353  | 57.75599 | 40.19918 |
| 24165 | TRNAP-AG  | 1.101904 | -1.18902 | 3.124955 | -0.38049 | 0.703581 | 0.774009 | 0        | 4.379295 | 0        | 2.232127 | 0        | 0        |
| 1178  | FOXp1     | 6141.462 | -1.1896  | 0.116244 | -10.2337 | 1.40E-24 | 3.16E-23 | 7890.067 | 10001.21 | 7726.097 | 3716.491 | 3756.278 | 3758.623 |
| 2199  | RPS13     | 16571.98 | -1.18979 | 0.156468 | -7.60405 | 2.87E-14 | 3.47E-13 | 26245.65 | 16375.82 | 26508.76 | 10116    | 9730.814 | 10454.8  |
| 11067 | LOC119624 | 39.00918 | -1.19063 | 0.455799 | -2.61218 | 0.008997 | 0.021612 | 60.71367 | 45.98259 | 54.26705 | 33.4819  | 23.53022 | 16.07967 |
| 5478  | LOC103230 | 119.1552 | -1.19104 | 0.269226 | -4.42394 | 9.69E-06 | 4.70E-05 | 158.8313 | 186.6674 | 153.0609 | 80.35657 | 55.61688 | 80.39836 |
| 23262 | LOC119624 | 1.341788 | -1.19108 | 2.290095 | -0.52    |          |          |          |          |          |          |          |          |



|       |           |          |          |          |          |          |          |          |          |          |          |          |          |
|-------|-----------|----------|----------|----------|----------|----------|----------|----------|----------|----------|----------|----------|----------|
| 10133 | LOC103221 | 46.4651  | -1.19139 | 0.420875 | -2.83075 | 0.004644 | 0.01218  | 77.51835 | 45.43518 | 70.9646  | 26.78552 | 29.94755 | 28.13943 |
| 2674  | LOC103246 | 344.1934 | -1.19161 | 0.173507 | -6.8678  | 6.52E-12 | 6.48E-11 | 531.7867 | 472.9638 | 433.4406 | 191.9629 | 213.9111 | 221.0955 |
| 6378  | PSIP1     | 9630.555 | -1.19185 | 0.298825 | -3.98845 | 6.65E-05 | 0.000277 | 10662.84 | 18933.33 | 10593.9  | 5772.28  | 6032.292 | 5788.682 |
| 13974 | DCDC2B    | 21.60542 | -1.19242 | 0.591255 | -2.01677 | 0.04372  | 0.083176 | 38.48813 | 31.20247 | 20.87194 | 11.16063 | 12.83466 | 15.07469 |
| 925   | SLC1A4    | 5067.324 | -1.1935  | 0.104993 | -11.3674 | 6.08E-30 | 1.75E-28 | 6919.733 | 7458.486 | 6784.772 | 3131.674 | 2746.618 | 3362.661 |
| 1064  | LOC103245 | 3514.78  | -1.19372 | 0.111838 | -10.6737 | 1.35E-26 | 3.38E-25 | 4652.727 | 5485.066 | 4541.039 | 2145.074 | 1991.512 | 2273.264 |
| 23792 | LOC119621 | 1.081963 | -1.19416 | 2.730877 | -0.43728 | 0.661907 | 0.73961  | 2.710432 | 1.642235 | 0        | 0        | 2.139111 | 0        |
| 1669  | ATAD5     | 2194.423 | -1.19553 | 0.135906 | -8.7967  | 1.41E-18 | 2.24E-17 | 2837.28  | 3610.181 | 2722.397 | 1194.188 | 1358.335 | 1444.155 |
| 9098  | LOC119620 | 53.13321 | -1.19607 | 0.387834 | -3.08398 | 0.002042 | 0.005968 | 81.31296 | 58.57306 | 80.70484 | 35.71403 | 36.36488 | 26.12947 |
| 1098  | EREG      | 1795.685 | -1.19629 | 0.113597 | -10.531  | 6.22E-26 | 1.51E-24 | 2371.628 | 2778.662 | 2350.181 | 1055.796 | 1129.45  | 1088.393 |
| 21769 | TRNAI-GAI | 3.011712 | -1.19633 | 1.563833 | -0.765   | 0.444274 | 0.542564 | 6.505036 | 4.926706 | 1.391463 | 2.232127 | 0        | 3.014938 |
| 1634  | LOC119618 | 795.8714 | -1.19661 | 0.134632 | -8.88801 | 6.22E-19 | 1.01E-17 | 1108.567 | 1223.465 | 991.4172 | 488.8358 | 485.5781 | 477.3652 |
| 4596  | LOC119627 | 405.2222 | -1.19675 | 0.242006 | -4.94512 | 7.61E-07 | 4.40E-06 | 713.3857 | 348.1539 | 631.7241 | 232.1412 | 256.6933 | 249.2349 |
| 12977 | LOC119618 | 29.74049 | -1.19709 | 0.542252 | -2.20763 | 0.02727  | 0.055866 | 47.7036  | 29.01283 | 45.91827 | 20.08914 | 25.66933 | 10.04979 |
| 13587 | LOC103221 | 31.82671 | -1.19725 | 0.572336 | -2.09186 | 0.036451 | 0.071322 | 49.32986 | 24.08612 | 61.22436 | 8.928508 | 19.252   | 28.13943 |
| 6940  | RPS5      | 28855.55 | -1.19774 | 0.318446 | -3.76119 | 0.000169 | 0.000648 | 49661.07 | 22824.34 | 48085.47 | 17171.75 | 16400.56 | 18990.09 |
| 1485  | CCDC85C   | 1656.414 | -1.19786 | 0.128913 | -9.29199 | 1.51E-20 | 2.71E-19 | 2554.853 | 2040.751 | 2330.7   | 1037.939 | 889.87   | 1084.373 |
| 866   | RECQL     | 3136.76  | -1.19789 | 0.102371 | -11.7014 | 1.25E-31 | 3.85E-30 | 4350.243 | 4653.548 | 4099.945 | 2051.325 | 1803.27  | 1862.227 |
| 22737 | LOC119621 | 1.757053 | -1.19826 | 1.987421 | -0.60292 | 0.546559 | 0.639058 | 0.542086 | 3.284471 | 3.478657 | 2.232127 | 0        | 1.004979 |
| 2963  | CCDC136   | 410.67   | -1.19865 | 0.185212 | -6.47177 | 9.69E-11 | 8.69E-10 | 513.3558 | 695.213  | 508.5796 | 223.2127 | 267.3888 | 256.2698 |
| 573   | MRPS27    | 3926.371 | -1.20012 | 0.086551 | -13.8662 | 1.02E-43 | 4.71E-42 | 5585.116 | 5390.912 | 5440.619 | 2408.465 | 2308.1   | 2425.015 |
| 22715 | LOC119624 | 1.730356 | -1.20071 | 1.980006 | -0.60642 | 0.544236 | 0.636931 | 2.710432 | 3.831883 | 0.695731 | 0        | 2.139111 | 1.004979 |
| 17404 | LOC119626 | 9.819372 | -1.201   | 0.840584 | -1.42876 | 0.153072 | 0.23382  | 16.80468 | 14.23271 | 9.740239 | 6.696381 | 6.417332 | 5.024897 |
| 798   | LOC119618 | 4372.843 | -1.20126 | 0.099333 | -12.0933 | 1.15E-33 | 3.82E-32 | 5896.273 | 6628.062 | 5766.222 | 2540.161 | 2622.55  | 2783.793 |
| 15061 | LOC103221 | 18.33242 | -1.20199 | 0.659487 | -1.82261 | 0.068362 | 0.12067  | 23.30971 | 36.12918 | 18.08902 | 6.696381 | 10.69555 | 15.07469 |
| 1471  | PAWR      | 1720.152 | -1.20249 | 0.128967 | -9.32401 | 1.12E-20 | 2.02E-19 | 2218.76  | 2794.537 | 2179.031 | 1020.082 | 1099.503 | 1008.999 |
| 4633  | LOC103245 | 398.1721 | -1.2028  | 0.244065 | -4.92819 | 8.30E-07 | 4.76E-06 | 700.3756 | 341.0376 | 624.7668 | 223.2127 | 252.4151 | 247.2249 |
| 4357  | FOX11     | 159.6542 | -1.20352 | 0.235585 | -5.10865 | 3.24E-07 | 1.98E-06 | 193.5248 | 250.7146 | 221.9383 | 104.91   | 98.39909 | 88.43819 |
| 15344 | LOC103235 | 16.66084 | -1.20357 | 0.679344 | -1.77167 | 0.076449 | 0.132456 | 31.9831  | 20.25424 | 16.69755 | 11.16063 | 12.83466 | 7.034856 |
| 7973  | JAKMIP1   | 59.33366 | -1.20373 | 0.352134 | -3.41838 | 0.00063  | 0.0021   | 75.89209 | 90.32295 | 82.79203 | 35.71403 | 32.08666 | 39.1942  |
| 2347  | LOC103245 | 923.548  | -1.20503 | 0.16408  | -7.34414 | 2.07E-13 | 2.35E-12 | 1103.688 | 1611.58  | 1147.261 | 578.1209 | 569.0034 | 531.6341 |
| 2472  | RMI2      | 485.1475 | -1.20505 | 0.168217 | -7.16368 | 7.85E-13 | 8.45E-12 | 669.4767 | 742.8378 | 622.6796 | 305.8014 | 237.4413 | 332.6482 |
| 6147  | LOC103211 | 147.2048 | -1.20643 | 0.294313 | -4.09914 | 4.15E-05 | 0.000179 | 250.986  | 150.5382 | 217.0682 | 98.21359 | 59.8951  | 106.5278 |
| 516   | NUP58     | 6431.876 | -1.20738 | 0.083893 | -14.3919 | 5.82E-47 | 3.00E-45 | 9283.771 | 8965.511 | 8683.423 | 3857.115 | 3824.73  | 3976.704 |
| 14711 | LOC119621 | 23.77534 | -1.20739 | 0.639324 | -1.88854 | 0.058953 | 0.106537 | 28.73058 | 42.15071 | 29.22072 | 22.32127 | 2.139111 | 18.08963 |
| 21530 | TRNAL-AAI | 3.323801 | -1.20782 | 1.5096   | -0.80009 | 0.423657 | 0.523127 | 4.878777 | 4.379295 | 4.174388 | 2.232127 | 4.278221 | 0        |
| 5369  | LOC103246 | 163.6963 | -1.2086  | 0.269773 | -4.48005 | 7.46E-06 | 3.69E-05 | 238.518  | 177.3614 | 266.4651 | 129.4634 | 91.98176 | 78.3884  |
| 1630  | PAAF1     | 658.6438 | -1.20863 | 0.135773 | -8.90182 | 5.49E-19 | 8.96E-18 | 932.3886 | 892.8287 | 938.5416 | 352.6761 | 404.2919 | 431.1362 |
| 689   | CEBPG     | 4760.818 | -1.20868 | 0.093891 | -12.8733 | 6.36E-38 | 2.46E-36 | 6724.581 | 6881.514 | 6340.2   | 2830.337 | 2723.088 | 3065.187 |
| 1676  | RPLP0     | 82028.71 | -1.20933 | 0.137624 | -8.78719 | 1.53E-18 | 2.43E-17 | 132055.5 | 88557.55 | 122974.7 | 48934.92 | 46504.27 | 53145.32 |
| 2895  | POU6F1    | 261.7589 | -1.20989 | 0.184595 | -6.55428 | 5.59E-11 | 5.13E-10 | 363.1979 | 389.2098 | 344.387  | 169.6417 | 143.3204 | 160.7967 |
| 12048 | NKX3-2    | 29.2972  | -1.21039 | 0.504828 | -2.39763 | 0.016502 | 0.036409 | 39.5723  | 36.12918 | 46.614   | 24.5534  | 12.83466 | 16.07967 |
| 14470 | LRRC43    | 22.29798 | -1.21044 | 0.62715  | -1.93007 | 0.053598 | 0.09846  | 31.9831  | 26.27577 | 33.39511 | 17.85702 | 19.252   | 5.024897 |
| 1442  | LOC103221 | 5048.165 | -1.21148 | 0.128965 | -9.39381 | 5.79E-21 | 1.07E-19 | 7087.237 | 5902.742 | 8158.842 | 3272.298 | 3076.041 | 2791.833 |
| 5344  | LOC103247 | 136.7396 | -1.21211 | 0.269761 | -4.49328 | 7.01E-06 | 3.49E-05 | 214.6662 | 175.1718 | 181.5859 | 111.6063 | 62.03421 | 75.37346 |
| 1183  | RGL1      | 3058.529 | -1.21216 | 0.118715 | -10.2107 | 1.78E-24 | 3.99E-23 | 4157.26  | 4720.332 | 3950.363 | 1758.916 | 1692.037 | 2072.268 |
| 15540 | LOC103215 | 15.4533  | -1.21265 | 0.697807 | -1.7378  | 0.082245 | 0.14071  | 22.76763 | 23.53871 | 17.39328 | 11.16063 | 12.83466 | 5.024897 |
| 20279 | CFTR      | 5.657077 | -1.21284 | 1.234108 | -0.98277 | 0.325722 | 0.426988 | 5.96295  | 6.568942 | 10.43597 | 6.696381 | 4.278221 | 0        |
| 9067  | LOC103247 | 65.3708  | -1.21322 | 0.392494 | -3.09104 | 0.001995 | 0.005848 | 102.4543 | 55.83601 | 116.1871 | 40.17829 | 36.36488 | 41.20416 |
| 3035  | SYT7      | 312.27   | -1.21381 | 0.190787 | -6.36213 | 1.99E-10 | 1.74E-09 | 400.6018 | 486.6491 | 416.7431 | 205.3557 | 207.4937 | 156.7768 |
| 3724  | LOC103221 | 179.7667 | -1.21431 | 0.216213 | -5.61629 | 1.95E-08 | 1.39E-07 | 232.013  | 269.3266 | 250.4633 | 116.0706 | 111.2338 | 99.49297 |
| 9671  | LOC103215 | 46.17444 | -1.21435 | 0.413194 | -2.93893 | 0.003293 | 0.009054 | 61.79785 | 53.64636 | 79.31338 | 22.32127 | 27.80844 | 32.15934 |
| 1699  | LOC103235 | 1108.884 | -1.21436 | 0.139064 | -8.73243 | 2.49E-18 | 3.90E-17 | 1624.091 | 1297.913 | 1728.197 | 642.8526 | 690.9327 | 669.3163 |
| 1167  | SDCCAG8   | 2041.397 | -1.21439 | 0.118213 | -10.2729 | 9.34E-25 | 2.13E-23 | 2736.452 | 3171.704 | 2649.345 | 1147.313 | 1347.64  | 1195.926 |
| 7237  | LOC119621 | 78.9562  | -1.21441 | 0.332147 | -3.65625 | 0.000256 | 0.00094  | 93.78094 | 139.59   | 96.70666 | 49.10679 | 51.33866 | 43.21412 |
| 1606  | CASK      | 2650.706 | -1.21444 | 0.135476 | -8.96429 | 3.12E-19 | 5.17E-18 | 3476.4   | 4359.588 | 3285.939 | 1466.507 | 1520.988 | 1794.893 |
| 14493 | TMEM255   | 23.61675 | -1.215   | 0.630763 | -1.92624 | 0.054075 | 0.099191 | 19.51511 | 45.43518 | 32.69937 | 15.62489 | 21.39111 | 7.034856 |
| 420   | RPL23     | 44435.23 | -1.21523 | 0.078665 | -15.4482 | 7.75E-54 | 4.91E-52 | 62910.75 | 59527.75 | 63911.28 | 27292.22 | 26231.91 | 26737.48 |
| 15544 | LOC119621 | 19.14531 | -1.21565 | 0.699854 | -1.737   | 0.082387 | 0.140907 | 41.74065 | 12.59047 | 25.04633 | 15.62489 | 12.83466 | 7.034856 |
| 1353  | OXCT1     | 2803.867 | -1.21578 | 0.125209 | -9.71002 | 2.73E-22 | 5.37E-21 | 3618.427 | 4610.302 | 3533.62  | 1696.417 | 1610.75  | 1753.689 |
| 1541  | LOC119618 | 796.4323 | -1.21637 | 0.133415 | -9.1172  | 7.71E-20 | 1.33E-18 | 1035.385 | 1219.634 | 1090.211 | 462.0503 | 457.7697 | 513.5445 |
| 4694  | LOC103221 | 179.8913 | -1.21644 | 0.248886 | -4.88751 | 1.02E-06 | 5.78E-06 | 285.1374 | 202.5424 | 270.6395 | 102.6778 | 87.70354 | 130.6473 |
| 22044 | LOC119618 | 2.413646 | -1.2165  | 1.695242 | -0.71759 | 0.473008 | 0.570446 | 5.96295  | 2.189647 | 2.087194 | 2.232127 | 0        | 2.009959 |
| 17813 | KRT85     | 10.66039 | -1.21685 | 0.885185 | -1.37469 | 0.169228 | 0.252565 | 7.589209 | 14.78012 | 22.2634  | 11.16063 | 2.139111 | 6.029877 |
| 17854 | LOC119621 | 10.32376 | -1.217   | 0.889255 | -1.36856 | 0.171138 | 0.254829 | 11.9259  | 10.94824 | 19.48048 | 11.16063 | 6.417332 | 2.009959 |
| 15101 | KKRX      | 16.25889 | -1.21721 | 0.671065 | -1.81384 | 0.069702 | 0.122709 | 26.02015 | 25.72836 | 16.00182 | 8.928508 | 12.83466 | 8.039836 |
| 16233 | TRNAK-UU  | 14.58739 | -1.21771 | 0.751183 | -1.62106 | 0.105006 | 0.171969 | 11.9259  | 32.84471 | 16.00182 | 11.16063 | 8.556443 | 7.034856 |
| 19700 | HMX2      | 6.780836 | -1.21793 | 1.138416 | -1.06985 | 0.284687 | 0.384183 | 8.673382 | 9.853413 | 9.044508 | 6.696381 | 6.417332 | 0        |
| 1234  | NIPAL1    | 1093.067 | -1.21808 | 0.1212   | -10.0502 | 9.17E-24 | 1.98E-22 | 1511.337 | 1643.878 | 1426.249 | 674.1023 | 688.7936 | 614.0425 |
| 736   | PPP1R8    | 2024.671 | -1.21851 | 0.096935 | -12.5705 | 3.07E-36 | 1.11E-34 | 2809.634 | 2837.783 | 2846.933 | 1281.241 | 1176.511 | 1195.926 |
| 3012  | LOC103221 | 11414.5  | -1.21852 | 0.19034  | -6.4018  | 1.54E-10 | 1.36E-09 | 18732.88 | 9825.49  |          |          |          |          |



|       |           |          |          |          |          |          |          |          |          |          |          |          |          |
|-------|-----------|----------|----------|----------|----------|----------|----------|----------|----------|----------|----------|----------|----------|
| 1671  | HDGFL3    | 4887.733 | -1.22007 | 0.138704 | -8.79619 | 1.42E-18 | 2.25E-17 | 6004.691 | 8439.448 | 6072.343 | 2810.248 | 3161.606 | 2838.062 |
| 4670  | SYNGR3    | 160.2894 | -1.22026 | 0.248818 | -4.90421 | 9.38E-07 | 5.34E-06 | 237.9759 | 175.7192 | 259.5078 | 91.51721 | 100.5382 | 96.47803 |
| 1792  | SEMA5A    | 505.0214 | -1.22035 | 0.144022 | -8.4734  | 2.38E-17 | 3.54E-16 | 699.8335 | 744.4801 | 679.0338 | 285.7123 | 299.4755 | 321.5934 |
| 15740 | SLC10A6   | 14.43628 | -1.22047 | 0.713059 | -1.71159 | 0.086972 | 0.146896 | 20.0572  | 20.80165 | 18.78475 | 13.39276 | 8.556443 | 5.024897 |
| 13754 | LOC103232 | 24.97458 | -1.22064 | 0.593351 | -2.0572  | 0.039667 | 0.076673 | 26.56223 | 40.50847 | 38.96096 | 4.464254 | 19.252   | 20.09959 |
| 1998  | CUHNH17or | 429.1525 | -1.22087 | 0.152563 | -8.00239 | 1.22E-15 | 1.62E-14 | 606.0526 | 566.0238 | 628.9412 | 276.7837 | 243.8586 | 253.2548 |
| 923   | TRIM37    | 7695.838 | -1.22101 | 0.107337 | -11.3755 | 5.54E-30 | 1.59E-28 | 10263.32 | 12241.22 | 9811.9   | 4551.307 | 4513.524 | 4793.752 |
| 10278 | LOC103242 | 43.57095 | -1.22137 | 0.437132 | -2.79405 | 0.005205 | 0.013464 | 68.84497 | 45.43518 | 70.26887 | 22.32127 | 21.39111 | 33.16432 |
| 1690  | DTNB      | 511.9454 | -1.2217  | 0.139622 | -8.75006 | 2.13E-18 | 3.35E-17 | 718.8065 | 726.9629 | 706.8631 | 299.105  | 297.3364 | 322.5984 |
| 18041 | LOC103232 | 9.545455 | -1.22184 | 0.914401 | -1.33622 | 0.181478 | 0.267424 | 16.80468 | 17.51718 | 6.261582 | 2.232127 | 6.417332 | 8.039836 |
| 17691 | PLAC9     | 11.95539 | -1.22191 | 0.881138 | -1.38674 | 0.165521 | 0.248736 | 13.55216 | 20.80165 | 14.61036 | 8.928508 | 12.83466 | 1.004979 |
| 8571  | LOC119616 | 55.36789 | -1.22249 | 0.37778  | -3.23599 | 0.001212 | 0.00376  | 67.7608  | 81.56436 | 81.40057 | 35.71403 | 40.6431  | 25.12449 |
| 7778  | ERICH3    | 114.823  | -1.22292 | 0.352366 | -3.47061 | 0.000519 | 0.001775 | 126.8482 | 217.3225 | 134.2762 | 82.5887  | 87.70354 | 40.19918 |
| 944   | GPD2      | 2682.34  | -1.22347 | 0.108933 | -11.2314 | 2.86E-29 | 8.05E-28 | 3550.666 | 4206.86  | 3509.965 | 1611.596 | 1615.029 | 1599.927 |
| 3063  | SORCS3    | 250.7016 | -1.22354 | 0.193723 | -6.31592 | 2.69E-10 | 2.33E-09 | 366.4504 | 361.2918 | 322.1236 | 149.5525 | 171.1289 | 133.6623 |
| 1745  | MSI1      | 519.9563 | -1.2239  | 0.142254 | -8.60357 | 7.73E-18 | 1.18E-16 | 742.1162 | 757.618  | 687.3826 | 299.105  | 305.8928 | 327.6233 |
| 5026  | ZNF607    | 123.4935 | -1.22412 | 0.261909 | -4.67385 | 2.96E-06 | 1.56E-05 | 184.8515 | 171.8873 | 159.3225 | 75.89232 | 87.70354 | 61.30375 |
| 3495  | ZIC5      | 195.4568 | -1.2245  | 0.208976 | -5.85949 | 4.64E-09 | 3.53E-08 | 269.4169 | 290.6757 | 263.6822 | 102.6778 | 117.6511 | 128.6374 |
| 2236  | RPS23     | 20876.22 | -1.22477 | 0.162564 | -7.53411 | 4.92E-14 | 5.85E-13 | 33464.08 | 20225.77 | 34032.4  | 12854.82 | 12633.59 | 12046.69 |
| 23649 | LOC119616 | 0.852033 | -1.22543 | 2.653469 | -0.46182 | 0.64421  | 0.724188 | 2.168345 | 0.547412 | 1.391463 | 0        | 0        | 1.004979 |
| 604   | RPS4X     | 62842.69 | -1.22595 | 0.090376 | -13.565  | 6.46E-42 | 2.84E-40 | 81687.54 | 95495.99 | 86946.25 | 38245.26 | 38268.69 | 36412.42 |
| 649   | LOC103242 | 8942.761 | -1.22628 | 0.0933   | -13.1434 | 1.86E-39 | 7.60E-38 | 12072.26 | 12842.83 | 12664.4  | 5437.461 | 5724.26  | 4915.355 |
| 2748  | CKAP2L    | 2648.525 | -1.22658 | 0.181006 | -6.77646 | 1.23E-11 | 1.19E-10 | 2989.606 | 5058.633 | 3088.352 | 1426.329 | 1593.637 | 1734.595 |
| 21150 | LOC103232 | 3.562327 | -1.22709 | 1.429527 | -0.85839 | 0.390677 | 0.491112 | 7.589209 | 3.831883 | 3.478657 | 4.464254 | 0        | 2.009959 |
| 18285 | SP5       | 7.75112  | -1.22752 | 0.954052 | -1.28663 | 0.198222 | 0.288199 | 8.673382 | 14.23271 | 9.740239 | 6.696381 | 2.139111 | 5.024897 |
| 10433 | LOC119616 | 55.39498 | -1.22827 | 0.445094 | -2.75958 | 0.005788 | 0.014748 | 94.32303 | 41.6033  | 98.09812 | 33.4819  | 25.66933 | 39.1942  |
| 2070  | KLHL29    | 513.3667 | -1.22839 | 0.156479 | -7.85016 | 4.16E-15 | 5.34E-14 | 755.6684 | 696.3078 | 712.4289 | 252.2303 | 320.8666 | 342.698  |
| 15145 | AHSJ      | 23.67218 | -1.22892 | 0.680134 | -1.80687 | 0.070782 | 0.124248 | 42.28274 | 26.82318 | 28.52499 | 17.85702 | 23.53022 | 3.014938 |
| 2447  | COLEC12   | 603.6282 | -1.22936 | 0.170742 | -7.20007 | 6.02E-13 | 6.54E-12 | 786.0252 | 1028.587 | 725.6478 | 325.8905 | 380.7617 | 374.8573 |
| 17436 | LOC119622 | 9.54198  | -1.2294  | 0.865581 | -1.42032 | 0.155515 | 0.237117 | 14.09425 | 14.23271 | 11.82743 | 8.928508 | 2.139111 | 6.029877 |
| 26952 | TRNAE-UU  | 0.361391 | -1.22974 | 3.978638 | -0.30909 | 0.757256 | NA       | 2.168345 | 0        | 0        | 0        | 0        | 0        |
| 1427  | NTN4      | 883.6577 | -1.23011 | 0.130268 | -9.44293 | 3.63E-21 | 6.75E-20 | 1177.954 | 1370.172 | 1171.612 | 493.3001 | 541.195  | 547.7138 |
| 15225 | SULT1B1   | 18.48121 | -1.23021 | 0.686797 | -1.79122 | 0.073258 | 0.127919 | 22.76763 | 20.80165 | 32.69937 | 15.62489 | 14.97377 | 4.019918 |
| 15743 | LOC103222 | 20.80432 | -1.2303  | 0.719609 | -1.70968 | 0.087324 | 0.147463 | 21.14137 | 52.55153 | 14.61036 | 4.464254 | 14.97377 | 17.08465 |
| 8086  | LOC119622 | 57.2337  | -1.23031 | 0.363325 | -3.38626 | 0.000709 | 0.00233  | 73.72375 | 90.32295 | 76.53045 | 29.01765 | 40.6431  | 33.16432 |
| 3743  | LOC119622 | 263.4357 | -1.23061 | 0.219711 | -5.60103 | 2.13E-08 | 1.51E-07 | 335.5515 | 449.9725 | 322.8194 | 185.2665 | 126.2075 | 160.7967 |
| 21789 | LOC119628 | 3.468987 | -1.23148 | 1.617711 | -0.76125 | 0.446508 | 0.54479  | 5.96295  | 3.284471 | 4.87012  | 6.696381 | 0        | 0        |
| 5433  | LOC103222 | 158.4619 | -1.23158 | 0.277055 | -4.44525 | 8.78E-06 | 4.30E-05 | 260.7435 | 161.4865 | 247.6804 | 89.28508 | 77.00798 | 114.5677 |
| 617   | RPL38     | 28266.85 | -1.23216 | 0.091807 | -13.4212 | 4.54E-41 | 1.96E-39 | 39516.47 | 36678.78 | 42761.04 | 17441.84 | 17035.88 | 16167.1  |
| 1210  | YOD1      | 1156.616 | -1.23238 | 0.121721 | -10.1247 | 4.29E-24 | 9.44E-23 | 1594.818 | 1755.002 | 1522.956 | 633.9241 | 697.3501 | 735.645  |
| 1356  | TMEM98    | 3786.216 | -1.23243 | 0.12706  | -9.69956 | 3.03E-22 | 5.94E-21 | 5837.728 | 4464.143 | 5640.99  | 2124.985 | 2154.084 | 2495.364 |
| 27275 | LOC119622 | 0.362278 | -1.23301 | 3.978477 | -0.30992 | 0.756621 | NA       | 1.626259 | 0.547412 | 0        | 0        | 0        | 0        |
| 29201 | LOC119622 | 0.362278 | -1.23301 | 3.978477 | -0.30992 | 0.756621 | NA       | 1.626259 | 0.547412 | 0        | 0        | 0        | 0        |
| 7945  | COLEC10   | 77.73062 | -1.23324 | 0.360044 | -3.42525 | 0.000614 | 0.002055 | 102.4543 | 114.9565 | 107.1426 | 37.94616 | 72.72976 | 31.15436 |
| 1591  | NSUN6     | 666.4929 | -1.23439 | 0.137165 | -8.99933 | 2.27E-19 | 3.79E-18 | 930.7623 | 994.6473 | 876.6215 | 392.8543 | 434.2395 | 369.8324 |
| 19932 | CPVL      | 4.846273 | -1.23446 | 1.185095 | -1.04166 | 0.297571 | 0.396865 | 5.96295  | 9.853413 | 4.87012  | 2.232127 | 2.139111 | 4.019918 |
| 7354  | IQCD      | 69.66478 | -1.23527 | 0.341655 | -3.61556 | 0.0003   | 0.001083 | 84.02339 | 115.5039 | 92.53227 | 49.10679 | 40.6431  | 36.17926 |
| 9848  | CCDC200   | 70.7227  | -1.23557 | 0.426859 | -2.89455 | 0.003797 | 0.01025  | 85.10756 | 123.7151 | 85.57496 | 69.19594 | 40.6431  | 20.09959 |
| 10483 | LOC103242 | 7797.197 | -1.23603 | 0.449659 | -2.74882 | 0.005981 | 0.015168 | 13648.65 | 5045.495 | 14147    | 4843.716 | 4331.699 | 4766.618 |
| 5501  | LOC103222 | 97.9492  | -1.23617 | 0.280326 | -4.40976 | 1.03E-05 | 5.00E-05 | 139.8583 | 133.5685 | 137.7548 | 55.80317 | 68.45154 | 52.25893 |
| 27017 | LOC119622 | 0.363166 | -1.23628 | 3.978316 | -0.31075 | 0.755988 | NA       | 1.084173 | 1.094824 | 0        | 0        | 0        | 0        |
| 28481 | LOC119620 | 0.363166 | -1.23628 | 3.978316 | -0.31075 | 0.755988 | NA       | 1.084173 | 1.094824 | 0        | 0        | 0        | 0        |
| 6071  | ADGRA2    | 105.6566 | -1.23639 | 0.298936 | -4.13597 | 3.53E-05 | 0.000155 | 143.6529 | 138.4952 | 159.3225 | 66.96381 | 81.28621 | 44.2191  |
| 17888 | LOC119622 | 9.080944 | -1.23651 | 0.907639 | -1.36234 | 0.173092 | 0.257248 | 8.131296 | 10.40082 | 20.17621 | 4.464254 | 4.278221 | 7.034856 |
| 761   | METTL2A   | 1843.28  | -1.23667 | 0.099529 | -12.4253 | 1.91E-35 | 6.66E-34 | 2634.54  | 2517     | 2615.254 | 1044.635 | 1133.729 | 1114.522 |
| 958   | RAD51C    | 1740.444 | -1.23725 | 0.110829 | -11.1636 | 6.15E-29 | 1.71E-27 | 2398.19  | 2658.779 | 2272.954 | 1087.046 | 1009.66  | 1016.034 |
| 4698  | NSG1      | 119.075  | -1.23738 | 0.2533   | -4.88502 | 1.03E-06 | 5.85E-06 | 159.9155 | 174.6244 | 166.2798 | 71.42806 | 74.86887 | 67.33362 |
| 6854  | SOX8      | 71.63569 | -1.23824 | 0.326367 | -3.79403 | 0.000148 | 0.000575 | 98.11763 | 90.32295 | 112.7085 | 42.41041 | 47.06043 | 39.1942  |
| 1577  | CHRN81    | 1430.692 | -1.23857 | 0.137021 | -9.0393  | 1.58E-19 | 2.66E-18 | 1827.373 | 2382.884 | 1821.425 | 823.6549 | 836.3923 | 892.4218 |
| 2149  | SCLT1     | 1264.268 | -1.23949 | 0.161347 | -7.68217 | 1.56E-14 | 1.93E-13 | 1553.62  | 2250.41  | 1522.26  | 781.2444 | 761.5234 | 716.5504 |
| 26929 | LOC119622 | 0.364054 | -1.23954 | 3.978156 | -0.31159 | 0.755355 | NA       | 0.542086 | 1.642235 | 0        | 0        | 0        | 0        |
| 27470 | LOC119620 | 0.364054 | -1.23954 | 3.978156 | -0.31159 | 0.755355 | NA       | 0.542086 | 1.642235 | 0        | 0        | 0        | 0        |
| 27764 | LOC119622 | 0.364054 | -1.23954 | 3.978156 | -0.31159 | 0.755355 | NA       | 0.542086 | 1.642235 | 0        | 0        | 0        | 0        |
| 1573  | EXPH5     | 2281.103 | -1.23965 | 0.137066 | -9.04422 | 1.51E-19 | 2.55E-18 | 2908.293 | 3886.076 | 2819.799 | 1408.472 | 1311.275 | 1352.702 |
| 4857  | PLPPR4    | 150.4768 | -1.24019 | 0.259749 | -4.77454 | 1.80E-06 | 9.86E-06 | 172.9256 | 255.6413 | 206.6322 | 73.66019 | 100.5382 | 93.46309 |
| 735   | STRADB    | 2891.076 | -1.24057 | 0.098685 | -12.571  | 3.05E-36 | 1.10E-34 | 3955.604 | 4374.368 | 3856.439 | 1700.881 | 1764.766 | 1694.395 |
| 4881  | LOC119622 | 136.544  | -1.2414  | 0.261242 | -4.75192 | 2.01E-06 | 1.10E-05 | 215.7504 | 166.9606 | 196.1962 | 64.73168 | 79.14709 | 96.47803 |
| 696   | RPSA      | 48422.76 | -1.24144 | 0.096663 | -12.8429 | 9.42E-38 | 3.60E-36 | 72976.75 | 60945    | 70261.91 | 28801.13 | 27641.59 | 29910.2  |
| 10848 | MIR1915H  | 36.95111 | -1.24256 | 0.466986 | -2.6608  | 0.007796 | 0.019101 | 47.7036  | 45.43518 | 61.22436 | 22.32127 | 29.94755 | 15.07469 |
| 1520  | BST1      | 665.633  | -1.24372 | 0.13556  | -9.17472 | 4.53E-20 | 7.92E-19 | 924.2573 | 920.1993 | 968.4581 | 348.2118 | 408.5701 | 424.1013 |
| 12016 | LOC119622 | 35.84542 | -1.24535 | 0.51806  | -2.40388 | 0.016222 | 0.035891 | 57.46116 | 26.82318 | 66.79021 | 26.78552 | 17.11289 | 20.09959 |
| 6020  | LOC103222 | 123.568  | -1.24554 | 0.299699 | -4.15597 | 3.24E-05 | 0.000143 | 205.9928 | 117.6935 | 198      |          |          |          |



|       |           |          |          |          |          |          |          |          |          |          |          |          |          |
|-------|-----------|----------|----------|----------|----------|----------|----------|----------|----------|----------|----------|----------|----------|
| 5715  | PRSS35    | 112.9474 | -1.24699 | 0.288832 | -4.31735 | 1.58E-05 | 7.35E-05 | 169.1309 | 164.771  | 144.7121 | 42.41041 | 81.28621 | 75.37346 |
| 1381  | MAGEF1    | 789.9312 | -1.24768 | 0.129817 | -9.61107 | 7.18E-22 | 1.38E-20 | 1108.025 | 1156.134 | 1064.469 | 506.6928 | 479.1608 | 425.1063 |
| 15404 | LOC119625 | 17.97008 | -1.24774 | 0.70923  | -1.75929 | 0.078529 | 0.135529 | 21.14137 | 24.63353 | 28.52499 | 13.39276 | 17.11289 | 3.014938 |
| 9938  | LOC103235 | 45.37813 | -1.24777 | 0.43369  | -2.87709 | 0.004014 | 0.010737 | 71.5554  | 48.17224 | 73.74753 | 20.08914 | 23.53022 | 35.17428 |
| 15507 | LOC119625 | 14.05741 | -1.24805 | 0.716154 | -1.74272 | 0.081383 | 0.139522 | 21.68345 | 19.70683 | 17.39328 | 6.696381 | 12.83466 | 6.029877 |
| 9958  | FRAS1     | 49.84952 | -1.2483  | 0.434522 | -2.87282 | 0.004068 | 0.010861 | 65.59245 | 71.71095 | 70.26887 | 37.94616 | 38.50399 | 15.07469 |
| 1424  | LOC119625 | 2566.926 | -1.24848 | 0.132091 | -9.45164 | 3.34E-21 | 6.23E-20 | 3848.813 | 2993.795 | 3996.977 | 1642.845 | 1392.561 | 1526.564 |
| 22482 | LOC119625 | 1.777133 | -1.24889 | 1.946275 | -0.64168 | 0.521079 | 0.616176 | 4.336691 | 1.094824 | 2.087194 | 0        | 2.139111 | 1.004979 |
| 1914  | MAGI3     | 728.7256 | -1.24924 | 0.152887 | -8.171   | 3.06E-16 | 4.25E-15 | 928.594  | 1203.211 | 949.6733 | 410.7114 | 412.8484 | 467.3155 |
| 902   | KPNA6     | 5680.509 | -1.2507  | 0.109175 | -11.4559 | 2.20E-30 | 6.47E-29 | 8025.047 | 8367.737 | 7616.171 | 3341.494 | 2966.946 | 3765.658 |
| 3263  | PIMREG    | 404.9102 | -1.25124 | 0.205728 | -6.082   | 1.19E-09 | 9.67E-09 | 675.9817 | 413.2959 | 621.9838 | 232.1412 | 243.8586 | 242.2001 |
| 1915  | SLC25A19  | 413.8897 | -1.25135 | 0.153247 | -8.16555 | 3.20E-16 | 4.44E-15 | 602.258  | 591.7522 | 557.2808 | 229.9091 | 243.8586 | 258.2797 |
| 580   | SLC38A2   | 8257.56  | -1.2516  | 0.090632 | -13.8096 | 2.23E-43 | 1.02E-41 | 11636.43 | 11956.02 | 11309.81 | 4705.324 | 4669.679 | 5268.102 |
| 1564  | FZD2      | 1222.991 | -1.25168 | 0.138179 | -9.05837 | 1.32E-19 | 2.25E-18 | 1821.41  | 1465.969 | 1881.953 | 776.7802 | 648.1505 | 743.6848 |
| 2259  | SMIM20    | 706.1241 | -1.25212 | 0.167032 | -7.49628 | 6.57E-14 | 7.73E-13 | 1089.594 | 784.4411 | 1108.996 | 395.0865 | 455.6306 | 402.9968 |
| 11111 | LOC119625 | 37.66801 | -1.25307 | 0.481439 | -2.60276 | 0.009248 | 0.022127 | 68.30288 | 38.31883 | 54.26705 | 17.85702 | 17.11289 | 30.14938 |
| 706   | TXNDC12   | 2350.2   | -1.25335 | 0.098046 | -12.7832 | 2.03E-37 | 7.66E-36 | 3194.515 | 3522.048 | 3217.062 | 1379.454 | 1403.257 | 1384.862 |
| 23310 | LOC103245 | 1.124848 | -1.25362 | 2.448507 | -0.51199 | 0.608656 | 0.694171 | 1.084173 | 2.737059 | 0.695731 | 2.232127 | 0        | 0        |
| 6533  | LOC119625 | 103.1463 | -1.25364 | 0.319333 | -3.92582 | 8.64E-05 | 0.000352 | 157.205  | 140.6848 | 141.9292 | 33.4819  | 64.17332 | 81.40334 |
| 914   | EGFR      | 9947.548 | -1.25495 | 0.109964 | -11.4124 | 3.63E-30 | 1.06E-28 | 13009.53 | 15838.81 | 13220.29 | 5776.745 | 5480.402 | 6359.51  |
| 20173 | TRNAG-UC  | 5.031724 | -1.25496 | 1.254346 | -1.00049 | 0.317075 | 0.417753 | 5.96295  | 4.926706 | 11.1317  | 0        | 2.139111 | 6.029877 |
| 16616 | LOC103235 | 11.31379 | -1.25669 | 0.807837 | -1.55562 | 0.119798 | 0.191673 | 13.01007 | 14.23271 | 20.17621 | 11.16063 | 4.278221 | 5.024897 |
| 10435 | LOC103245 | 44.60142 | -1.25718 | 0.455697 | -2.7588  | 0.005801 | 0.01478  | 70.47123 | 44.34036 | 73.74753 | 37.94616 | 14.97377 | 26.12947 |
| 11286 | LOC119625 | 29.74475 | -1.25728 | 0.490914 | -2.5611  | 0.010434 | 0.02458  | 42.82482 | 39.41365 | 44.52681 | 15.62489 | 14.97377 | 21.10457 |
| 1155  | LOC103235 | 1205.353 | -1.2575  | 0.122073 | -10.3012 | 6.96E-25 | 1.60E-23 | 1729.256 | 1653.731 | 1722.631 | 736.6019 | 616.0639 | 773.8342 |
| 11573 | SLC2A12   | 28.01866 | -1.25752 | 0.502814 | -2.50096 | 0.012386 | 0.028452 | 43.36691 | 37.224   | 37.56949 | 15.62489 | 19.252   | 15.07469 |
| 2562  | STAC      | 344.1176 | -1.25823 | 0.178943 | -7.03149 | 2.04E-12 | 2.12E-11 | 468.9047 | 522.2309 | 459.1827 | 223.2127 | 220.3284 | 170.8465 |
| 10102 | PTGER2    | 45.72059 | -1.2588  | 0.443444 | -2.83869 | 0.00453  | 0.011921 | 65.59245 | 54.74118 | 70.9646  | 42.41041 | 23.53022 | 17.08465 |
| 467   | LOC103225 | 4305.443 | -1.25885 | 0.084475 | -14.9019 | 3.20E-50 | 1.82E-48 | 6137.502 | 5938.871 | 6142.612 | 2560.25  | 2519.872 | 2533.553 |
| 1043  | GCNT2     | 1326.69  | -1.2596  | 0.116532 | -10.809  | 3.12E-27 | 7.95E-26 | 1822.494 | 2044.036 | 1744.894 | 799.1015 | 797.8883 | 751.7246 |
| 1312  | RECQL5    | 1680.233 | -1.2601  | 0.128387 | -9.81486 | 9.72E-23 | 1.97E-21 | 2587.92  | 2141.475 | 2390.533 | 984.368  | 870.618  | 1106.482 |
| 18451 | TRNAK-CU  | 7.389388 | -1.26056 | 1.002945 | -1.25686 | 0.208804 | 0.300853 | 13.01007 | 5.474118 | 13.2189  | 4.464254 | 2.139111 | 6.029877 |
| 1198  | LOC103245 | 1672.864 | -1.26075 | 0.124158 | -10.1543 | 3.17E-24 | 7.03E-23 | 2465.409 | 2337.996 | 2289.652 | 868.2974 | 941.2087 | 1134.622 |
| 15842 | LOC119625 | 12.56073 | -1.26077 | 0.745027 | -1.69225 | 0.090599 | 0.152038 | 15.17842 | 21.89647 | 16.00182 | 6.696381 | 8.56443  | 7.034856 |
| 9741  | CEP126    | 53.79336 | -1.26132 | 0.432145 | -2.91874 | 0.003515 | 0.009592 | 59.08741 | 85.94365 | 80.00911 | 35.71403 | 44.92132 | 17.08465 |
| 3986  | ELAPOR2   | 167.0749 | -1.26203 | 0.234432 | -5.38335 | 7.31E-08 | 4.88E-07 | 220.0871 | 246.3353 | 237.9401 | 93.74933 | 121.9293 | 82.40832 |
| 1772  | EIF2B3    | 864.4666 | -1.26255 | 0.148092 | -8.52546 | 1.52E-17 | 2.28E-16 | 1329.196 | 1015.449 | 1317.715 | 531.2462 | 470.6043 | 522.5893 |
| 13726 | LOC103245 | 20.69392 | -1.26266 | 0.611358 | -2.06534 | 0.03889  | 0.075324 | 34.15144 | 21.89647 | 32.00364 | 15.62489 | 6.417332 | 14.06971 |
| 921   | CDC7      | 1933.476 | -1.26407 | 0.110915 | -11.3968 | 4.34E-30 | 1.25E-28 | 2542.385 | 3007.481 | 2640.996 | 1095.974 | 1174.372 | 1139.647 |
| 5321  | LOC103215 | 101.2462 | -1.26448 | 0.280503 | -4.50792 | 6.55E-06 | 3.27E-05 | 136.6058 | 139.59   | 152.3652 | 71.42806 | 49.19955 | 58.28881 |
| 1282  | PEF1      | 1700.54  | -1.26515 | 0.127781 | -9.90087 | 4.13E-23 | 8.56E-22 | 2648.634 | 2059.911 | 2501.85  | 959.8146 | 964.7389 | 1068.293 |
| 5087  | KCNJ14    | 133.2877 | -1.26665 | 0.273006 | -4.63964 | 3.49E-06 | 1.82E-05 | 202.7403 | 165.8658 | 194.1091 | 64.73168 | 106.9555 | 65.32367 |
| 13812 | TRNAA-CG  | 21.0144  | -1.26673 | 0.619284 | -2.04548 | 0.040807 | 0.078545 | 34.15144 | 30.10765 | 25.04633 | 4.464254 | 19.252   | 13.06473 |
| 10231 | LOC119625 | 64.07248 | -1.26772 | 0.451467 | -2.808   | 0.004985 | 0.012954 | 62.88202 | 147.2538 | 59.8329  | 42.41041 | 44.92132 | 27.13445 |
| 19698 | PI3       | 5.373527 | -1.26773 | 1.18422  | -1.07052 | 0.284387 | 0.383817 | 7.047123 | 6.02153  | 9.740239 | 0        | 6.417332 | 3.014938 |
| 907   | H1FO      | 14566.37 | -1.26844 | 0.110942 | -11.4334 | 2.85E-30 | 8.35E-29 | 19675.02 | 23655.85 | 18434.1  | 8470.922 | 8177.82  | 8984.516 |
| 2687  | CENPX     | 808.3164 | -1.26961 | 0.185321 | -6.85088 | 7.34E-12 | 7.26E-11 | 1282.576 | 829.8763 | 1319.107 | 473.2109 | 423.5439 | 521.5843 |
| 1749  | STXBP6    | 550.3421 | -1.26981 | 0.147763 | -8.59355 | 8.43E-18 | 1.28E-16 | 801.2037 | 795.9368 | 742.3454 | 321.4263 | 282.3626 | 358.7777 |
| 18422 | TRNAA-CG  | 8.308558 | -1.27038 | 1.007088 | -1.26144 | 0.207149 | 0.29894  | 13.01007 | 8.211177 | 13.91463 | 0        | 10.69555 | 4.019918 |
| 11615 | HPGD      | 30.20741 | -1.27063 | 0.51018  | -2.49055 | 0.012754 | 0.029193 | 47.7036  | 40.50847 | 38.26523 | 22.32127 | 21.39111 | 11.05477 |
| 2401  | LOC103225 | 5687.345 | -1.27186 | 0.174974 | -7.26882 | 3.63E-13 | 4.01E-12 | 9126.024 | 5372.3   | 9632.401 | 3477.654 | 3219.362 | 3296.333 |
| 7130  | ADCY5     | 80.45899 | -1.27251 | 0.345205 | -3.68623 | 0.000228 | 0.000849 | 103.5385 | 118.7884 | 115.4914 | 58.0353  | 57.75599 | 29.1444  |
| 1260  | LOC103215 | 1704.974 | -1.27261 | 0.127544 | -9.97783 | 1.91E-23 | 4.02E-22 | 2562.442 | 2142.022 | 2538.724 | 982.1359 | 892.0091 | 1112.512 |
| 943   | PXDN      | 2259.11  | -1.27274 | 0.113287 | -11.2346 | 2.76E-29 | 7.77E-28 | 3083.387 | 3436.651 | 3076.524 | 1256.687 | 1232.128 | 1469.28  |
| 1059  | ADGRA3    | 1689.093 | -1.27316 | 0.118969 | -10.7016 | 1.00E-26 | 2.51E-25 | 2300.072 | 2675.749 | 2194.337 | 1017.85  | 930.5131 | 1016.034 |
| 21314 | LOC119615 | 3.451839 | -1.27434 | 1.533861 | -0.8308  | 0.406085 | 0.50651  | 2.168345 | 4.379295 | 7.653045 | 2.232127 | 4.278221 | 0        |
| 14563 | MOGAT1    | 15.6066  | -1.27442 | 0.666248 | -1.91283 | 0.05577  | 0.101802 | 23.30971 | 19.70683 | 22.95914 | 8.928508 | 10.69555 | 8.039836 |
| 23811 | TRNAR-CC  | 0.876753 | -1.27478 | 2.929147 | -0.4352  | 0.663415 | 0.740703 | 2.168345 | 0        | 2.087194 | 0        | 0        | 1.004979 |
| 5200  | TRIM63    | 100.1095 | -1.27493 | 0.278455 | -4.57858 | 4.68E-06 | 2.39E-05 | 147.4475 | 135.2107 | 141.9292 | 51.33892 | 68.45154 | 56.27885 |
| 9130  | LOC103225 | 2642.09  | -1.2752  | 0.415015 | -3.07266 | 0.002122 | 0.006178 | 4657.606 | 1852.442 | 4708.014 | 1546.864 | 1486.682 | 1600.932 |
| 6005  | TENT5A    | 94.66323 | -1.27522 | 0.306443 | -4.16136 | 3.16E-05 | 0.00014  | 117.0907 | 166.9606 | 116.8829 | 58.0353  | 57.75599 | 51.25395 |
| 17661 | KCNJ13    | 8.830229 | -1.27567 | 0.914975 | -1.39421 | 0.163253 | 0.245743 | 16.80468 | 10.40082 | 9.740239 | 4.464254 | 8.556443 | 3.014938 |
| 23490 | LOC103245 | 0.879416 | -1.27587 | 2.622857 | -0.48644 | 0.626652 | 0.709219 | 0.542086 | 1.642235 | 2.087194 | 0        | 0        | 1.004979 |
| 1114  | EPB41     | 2687.214 | -1.27631 | 0.122003 | -10.4613 | 1.30E-25 | 3.10E-24 | 3560.423 | 4406.118 | 3447.349 | 1609.364 | 1475.986 | 1624.047 |
| 18026 | LOC103235 | 8.208878 | -1.27759 | 0.954534 | -1.33844 | 0.180752 | 0.266575 | 9.757555 | 15.32753 | 9.044508 | 6.696381 | 6.417332 | 2.009959 |
| 1862  | MECR      | 1277.773 | -1.27801 | 0.154483 | -8.27279 | 1.31E-16 | 1.87E-15 | 2027.403 | 1546.438 | 1858.298 | 823.6549 | 596.8119 | 814.0334 |
| 2142  | PHF7      | 382.5161 | -1.27884 | 0.166038 | -7.70208 | 1.34E-14 | 1.66E-13 | 539.918  | 593.9418 | 492.5778 | 205.3557 | 233.1631 | 230.1403 |
| 1506  | CLSTN3    | 522.2523 | -1.27948 | 0.138513 | -9.23729 | 2.53E-20 | 4.46E-19 | 730.1903 | 761.9972 | 725.6478 | 308.0335 | 310.171  | 297.4739 |
| 1902  | L3HYPDH   | 429.3634 | -1.27989 | 0.156193 | -8.19428 | 2.52E-16 | 3.52E-15 | 629.3623 | 576.4246 | 618.5052 | 225.4448 | 280.2235 | 246.22   |
| 2362  | PNMA2     | 304.9846 | -1.28014 | 0.174765 | -7.32492 | 2.39E-13 | 2.69E-12 | 455.3526 | 407.8218 | 433.4406 | 191.9629 | 160.4333 | 180.8963 |
| 794   | CSRP1     | 9340.067 | -1.28126 | 0.105633 | -12.1    |          |          |          |          |          |          |          |          |



|       |           |          |          |          |          |          |          |          |          |          |          |          |          |
|-------|-----------|----------|----------|----------|----------|----------|----------|----------|----------|----------|----------|----------|----------|
| 2445  | NLE1      | 1198.458 | -1.28511 | 0.178472 | -7.20059 | 6.00E-13 | 6.52E-12 | 2000.841 | 1271.09  | 1833.252 | 622.7634 | 641.7332 | 821.0682 |
| 11824 | LOC119620 | 32.1432  | -1.28565 | 0.526208 | -2.44324 | 0.014556 | 0.032728 | 55.29281 | 45.43518 | 34.09084 | 22.32127 | 25.66933 | 10.04979 |
| 6964  | LOC10322  | 74.11298 | -1.28589 | 0.342826 | -3.75084 | 0.000176 | 0.000673 | 97.03346 | 130.284  | 89.74935 | 35.71403 | 40.6431  | 51.25395 |
| 5908  | HOXA1     | 86.16809 | -1.28604 | 0.305679 | -4.20714 | 2.59E-05 | 0.000116 | 105.7068 | 133.5685 | 128.7103 | 42.41041 | 51.33866 | 55.27387 |
| 3489  | CEP112    | 202.6188 | -1.28621 | 0.21925  | -5.86642 | 4.45E-09 | 3.39E-08 | 261.2856 | 308.1929 | 290.12   | 107.1421 | 145.4595 | 103.5129 |
| 900   | SLC22A15  | 1525.251 | -1.28625 | 0.112198 | -11.4641 | 2.00E-30 | 5.90E-29 | 2313.083 | 2075.238 | 2108.066 | 828.1191 | 881.3136 | 945.6857 |
| 1888  | TMEM128   | 928.2917 | -1.28652 | 0.156448 | -8.22329 | 1.98E-16 | 2.79E-15 | 1479.354 | 1068     | 1405.377 | 477.6752 | 577.5599 | 561.7835 |
| 5896  | CCL27     | 101.1926 | -1.28658 | 0.30512  | -4.21664 | 2.48E-05 | 0.000112 | 151.2421 | 142.8745 | 135.6676 | 82.5887  | 38.50399 | 56.27885 |
| 12808 | EHF       | 38.87141 | -1.28668 | 0.575125 | -2.23722 | 0.025272 | 0.052456 | 48.24569 | 60.2153  | 54.26705 | 31.24978 | 34.22577 | 5.024897 |
| 1839  | LOC10322  | 672.8483 | -1.28749 | 0.15436  | -8.34084 | 7.38E-17 | 1.07E-15 | 1005.028 | 798.6738 | 1061.686 | 401.7829 | 367.927  | 401.9918 |
| 1240  | LOC11962  | 1044.06  | -1.28768 | 0.128397 | -10.0289 | 1.14E-23 | 2.44E-22 | 1459.839 | 1544.796 | 1447.817 | 593.7458 | 534.7777 | 683.386  |
| 14606 | CRYM      | 17.66569 | -1.28791 | 0.676068 | -1.905   | 0.05678  | 0.103347 | 24.39389 | 16.42235 | 34.09084 | 15.62489 | 6.417332 | 9.044815 |
| 829   | DNAJC24   | 1236.707 | -1.28915 | 0.108528 | -11.8784 | 1.53E-32 | 4.91E-31 | 1715.703 | 1810.838 | 1737.937 | 696.4236 | 750.8278 | 708.5105 |
| 614   | DSE       | 3666.334 | -1.28922 | 0.095774 | -13.461  | 2.65E-41 | 1.15E-39 | 5125.969 | 5441.273 | 5051.01  | 2104.896 | 2008.625 | 2266.229 |
| 2972  | PPP2R3B   | 426.0304 | -1.28951 | 0.199558 | -6.46183 | 1.03E-10 | 9.25E-10 | 660.2612 | 506.3559 | 654.6832 | 194.195  | 233.1631 | 307.5237 |
| 842   | DHFR      | 2976.32  | -1.28994 | 0.109179 | -11.8149 | 3.27E-32 | 1.03E-30 | 4229.358 | 4387.506 | 4059.593 | 1886.147 | 1514.49  | 1780.824 |
| 12216 | LOC10323  | 34.39061 | -1.29047 | 0.545869 | -2.36407 | 0.018075 | 0.039337 | 30.35684 | 78.27989 | 36.87376 | 20.08914 | 25.66933 | 15.07469 |
| 1117  | DNAJC8    | 3474.972 | -1.291   | 0.123486 | -10.4546 | 1.40E-25 | 3.32E-24 | 4374.095 | 5823.367 | 4602.959 | 2042.396 | 2000.068 | 2006.944 |
| 1088  | EPCAM     | 1817.758 | -1.29142 | 0.122398 | -10.5509 | 5.03E-26 | 1.23E-24 | 2350.486 | 2962.593 | 2430.885 | 1029.011 | 1065.277 | 1068.293 |
| 766   | PPIL3     | 3556.319 | -1.29201 | 0.104374 | -12.3786 | 3.41E-35 | 1.18E-33 | 4720.488 | 5240.921 | 5180.416 | 2084.807 | 2228.953 | 1882.327 |
| 1737  | PHACTR4   | 1732.352 | -1.29323 | 0.149968 | -8.62336 | 6.50E-18 | 9.95E-17 | 2165.093 | 3054.558 | 2165.116 | 993.2965 | 949.7651 | 1066.283 |
| 1767  | RPL13A    | 41646.8  | -1.29433 | 0.151398 | -8.54918 | 1.24E-17 | 1.87E-16 | 66961.76 | 42629.7  | 67915.21 | 24560.09 | 23904.56 | 23909.47 |
| 9646  | LOC11962  | 101.7501 | -1.29569 | 0.439539 | -2.94784 | 0.0032   | 0.008819 | 205.9928 | 53.64636 | 175.3243 | 60.26743 | 44.92132 | 70.34856 |
| 985   | H1-5      | 14389.69 | -1.29621 | 0.117101 | -11.0691 | 1.77E-28 | 4.78E-27 | 21824.94 | 16912.29 | 22618.23 | 8303.512 | 8331.836 | 8347.359 |
| 1810  | KIAA0408  | 1123.232 | -1.29641 | 0.153788 | -8.42983 | 3.46E-17 | 5.08E-16 | 1462.007 | 1963.019 | 1365.025 | 654.0132 | 631.0376 | 664.2914 |
| 23126 | C2CD4B    | 1.134066 | -1.29647 | 2.401156 | -0.53993 | 0.589243 | 0.677401 | 1.084173 | 2.189647 | 1.391463 | 0        | 2.139111 | 0        |
| 3274  | LOC11961  | 1025.906 | -1.2973  | 0.213802 | -6.06774 | 1.30E-09 | 1.05E-08 | 1628.427 | 905.4191 | 1840.209 | 647.3168 | 573.2817 | 560.7785 |
| 21208 | LOC11962  | 3.192739 | -1.29731 | 1.528095 | -0.84897 | 0.395897 | 0.496271 | 1.626259 | 6.02153  | 6.261582 | 2.232127 | 0        | 3.014938 |
| 673   | MMS22L    | 2917.986 | -1.29753 | 0.099987 | -12.9769 | 1.65E-38 | 6.53E-37 | 4174.065 | 4386.411 | 3887.747 | 1589.274 | 1734.819 | 1735.6   |
| 2922  | SMKR1     | 226.1988 | -1.29786 | 0.199052 | -6.52021 | 7.02E-11 | 6.39E-10 | 325.7939 | 301.6239 | 337.4297 | 147.3204 | 113.3729 | 131.6523 |
| 4570  | PABPC3    | 154.5458 | -1.29899 | 0.261906 | -4.95976 | 7.06E-07 | 4.11E-06 | 201.114  | 264.9473 | 192.7176 | 111.6063 | 68.45154 | 88.43819 |
| 9604  | VSTM4     | 71.77108 | -1.29922 | 0.438859 | -2.96046 | 0.003072 | 0.008503 | 91.6126  | 106.1979 | 105.0554 | 37.94616 | 72.72976 | 17.08465 |
| 661   | AXL       | 30625.57 | -1.2994  | 0.099471 | -13.0631 | 5.35E-39 | 2.15E-37 | 45567.78 | 41362.44 | 43747.59 | 17185.15 | 16240.13 | 19650.36 |
| 1985  | CHST14    | 444.9551 | -1.29958 | 0.161934 | -8.0254  | 1.01E-15 | 1.36E-14 | 680.3184 | 590.1099 | 633.8113 | 236.6055 | 237.4413 | 291.444  |
| 3159  | CCDC171   | 265.6382 | -1.29995 | 0.209399 | -6.20801 | 5.37E-10 | 4.52E-09 | 352.8982 | 429.7183 | 347.8657 | 136.1597 | 192.52   | 134.6672 |
| 17298 | LOC11962  | 10.04614 | -1.3002  | 0.897567 | -1.44858 | 0.147455 | 0.226621 | 16.80468 | 7.116354 | 19.48048 | 6.696381 | 2.139111 | 8.039836 |
| 8544  | LOC11962  | 64.23381 | -1.30105 | 0.401355 | -3.24164 | 0.001188 | 0.003697 | 115.4644 | 60.76271 | 98.79385 | 44.64254 | 23.53022 | 42.20914 |
| 1423  | CADM1     | 1298.743 | -1.3011  | 0.137639 | -9.45305 | 3.29E-21 | 6.15E-20 | 1664.747 | 2171.583 | 1710.108 | 709.8164 | 742.2714 | 793.9338 |
| 12459 | LOC11962  | 26.78602 | -1.30201 | 0.563919 | -2.30885 | 0.020952 | 0.044707 | 43.36691 | 25.72836 | 46.614   | 8.928508 | 14.97377 | 21.10457 |
| 9094  | LOC10324  | 45.90769 | -1.30327 | 0.422424 | -3.08522 | 0.002034 | 0.005946 | 62.33993 | 58.02565 | 73.74753 | 29.01765 | 34.22577 | 18.08963 |
| 10407 | LOC10323  | 40.32708 | -1.30336 | 0.471408 | -2.76483 | 0.005695 | 0.014549 | 35.23561 | 69.5213  | 66.79021 | 26.78552 | 23.53022 | 20.09959 |
| 782   | EIF1      | 6063.901 | -1.30353 | 0.106734 | -12.2129 | 2.65E-34 | 9.02E-33 | 8819.745 | 8183.259 | 8903.274 | 3330.333 | 3202.249 | 3944.544 |
| 2904  | LOC11962  | 347.9297 | -1.30405 | 0.199365 | -6.54101 | 6.11E-11 | 5.59E-10 | 578.4062 | 387.0202 | 521.1028 | 185.2665 | 211.772  | 204.0108 |
| 13521 | LOC10324  | 19.59859 | -1.30513 | 0.620432 | -2.10359 | 0.035415 | 0.069632 | 20.59928 | 32.84471 | 29.91645 | 15.62489 | 8.556443 | 10.04979 |
| 4921  | FOX2      | 136.972  | -1.30526 | 0.275771 | -4.73313 | 2.21E-06 | 1.19E-05 | 171.2993 | 245.7879 | 170.4542 | 66.96381 | 74.86887 | 92.45811 |
| 1631  | CCDC150   | 677.39   | -1.30536 | 0.146733 | -8.89614 | 5.78E-19 | 9.42E-18 | 949.7353 | 1077.854 | 868.9685 | 350.4439 | 404.2919 | 413.0466 |
| 1790  | CENPH     | 498.1528 | -1.30594 | 0.154004 | -8.47986 | 2.25E-17 | 3.35E-16 | 636.9515 | 786.0834 | 705.4716 | 276.7837 | 295.1973 | 288.4291 |
| 5684  | CUNH4orf  | 98.04131 | -1.30597 | 0.301289 | -4.33459 | 1.46E-05 | 6.83E-05 | 161.5417 | 128.0944 | 132.189  | 46.87467 | 49.19955 | 70.34856 |
| 1283  | RPL27     | 31127.74 | -1.30611 | 0.131925 | -9.90043 | 4.14E-23 | 8.59E-22 | 46888.3  | 34892.58 | 51202.35 | 18569.06 | 18071.21 | 17142.94 |
| 993   | ADCY3     | 2429.559 | -1.30633 | 0.118709 | -11.0044 | 3.64E-28 | 9.74E-27 | 3673.177 | 3138.859 | 3577.451 | 1366.062 | 1262.075 | 1559.728 |
| 10465 | EPHA6     | 32.83416 | -1.307   | 0.474779 | -2.75286 | 0.005908 | 0.015008 | 44.99317 | 48.71965 | 45.91827 | 15.62489 | 25.66933 | 16.07967 |
| 16089 | CALB1     | 16.67023 | -1.30706 | 0.793096 | -1.64805 | 0.099343 | 0.164143 | 16.26259 | 33.39212 | 20.17621 | 8.928508 | 19.252   | 2.009959 |
| 22446 | LOC11962  | 1.824254 | -1.30752 | 2.012083 | -0.64984 | 0.515798 | 0.610911 | 1.084173 | 6.02153  | 0.695731 | 0        | 2.139111 | 1.004979 |
| 11459 | LOC11962  | 27.82561 | -1.30776 | 0.517982 | -2.52472 | 0.011579 | 0.026862 | 45.53526 | 31.20247 | 42.43961 | 17.85702 | 12.83466 | 17.08465 |
| 8372  | LOC10322  | 52.7243  | -1.30798 | 0.397333 | -3.2919  | 0.000995 | 0.00316  | 81.31296 | 68.42648 | 74.44326 | 44.64254 | 21.39111 | 26.12947 |
| 7574  | LRR9      | 52.66985 | -1.30812 | 0.370133 | -3.5342  | 0.000409 | 0.001436 | 74.80792 | 73.90059 | 75.83472 | 31.24978 | 32.08666 | 28.13943 |
| 7336  | LOC11961  | 85.2681  | -1.30816 | 0.36137  | -3.62    | 0.000295 | 0.001068 | 150.1579 | 77.73248 | 137.0591 | 58.0353  | 36.36488 | 52.25893 |
| 8722  | CCDC39    | 66.23518 | -1.30819 | 0.409176 | -3.19714 | 0.001388 | 0.004231 | 69.92914 | 130.8314 | 80.00911 | 40.17829 | 51.33866 | 25.12449 |
| 2254  | PRR5L     | 350.522  | -1.30897 | 0.174516 | -7.50059 | 6.35E-14 | 7.49E-13 | 565.3961 | 448.8777 | 483.5333 | 203.1236 | 203.2155 | 198.9859 |
| 338   | IPO5      | 27034.9  | -1.309   | 0.07888  | -16.5949 | 7.59E-62 | 5.97E-60 | 39273.62 | 37793.31 | 38506.64 | 15461.94 | 15037.95 | 16135.95 |
| 13360 | LOC10321  | 21.34947 | -1.30909 | 0.613187 | -2.13489 | 0.03277  | 0.065208 | 31.44101 | 30.65506 | 30.61218 | 4.464254 | 12.83466 | 18.08963 |
| 9316  | LOC10321  | 68.07642 | -1.30934 | 0.432311 | -3.02869 | 0.002456 | 0.007009 | 121.4273 | 47.62483 | 123.1445 | 37.94616 | 32.08666 | 46.22906 |
| 1133  | LOC10324  | 992.3775 | -1.30953 | 0.126132 | -10.3823 | 2.99E-25 | 7.00E-24 | 1437.071 | 1344.443 | 1461.732 | 629.4598 | 502.691  | 578.8682 |
| 20338 | LOC10321  | 4.674477 | -1.30998 | 1.349148 | -0.97097 | 0.331565 | 0.433409 | 4.878777 | 5.474118 | 9.044508 | 2.232127 | 6.417332 | 0        |
| 18878 | LOC11961  | 5.989984 | -1.31004 | 1.085325 | -1.20705 | 0.227413 | 0.320255 | 8.673382 | 10.94824 | 5.565851 | 4.464254 | 4.278221 | 2.009959 |
| 762   | ARL5A     | 4710.263 | -1.31059 | 0.105558 | -12.4158 | 2.14E-35 | 7.48E-34 | 6500.7   | 7517.059 | 6121.045 | 2770.07  | 2699.558 | 2653.146 |
| 7789  | LOC11962  | 53.31729 | -1.31091 | 0.377975 | -3.46825 | 0.000524 | 0.001788 | 82.93921 | 71.71095 | 73.05179 | 24.5534  | 38.50399 | 29.1444  |
| 5270  | LOC11961  | 96.73209 | -1.31142 | 0.288989 | -4.53796 | 5.68E-06 | 2.87E-05 | 157.7471 | 129.7366 | 126.6231 | 49.10679 | 59.8951  | 57.28383 |
| 14540 | FGL2      | 21.60323 | -1.31373 | 0.684962 | -1.91796 | 0.055116 | 0.100774 | 31.44101 | 30.65506 | 29.22072 | 4.464254 | 27.80844 | 6.029877 |
| 459   | HMGA1     | 14667.25 | -1.31374 | 0.087737 | -14.9736 | 1.09E-50 | 6.33E-49 | 20546.7  | 21979.68 | 20239.52 | 8321.369 | 8013.109 | 8903.113 |
| 12253 | KNKIN2    | 24.56499 | -1.31378 | 0.557757 | -2.35547 | 0.018499 | 0.040134 | 32.52518 | 42.69812 | 29.91    |          |          |          |



|        |           |          |          |          |          |          |          |          |          |          |          |          |          |
|--------|-----------|----------|----------|----------|----------|----------|----------|----------|----------|----------|----------|----------|----------|
| 2987   | TMEM79    | 280.1914 | -1.31541 | 0.204188 | -6.44212 | 1.18E-10 | 1.05E-09 | 429.8745 | 349.2487 | 422.3089 | 122.767  | 186.1026 | 170.8465 |
| 387    | LOC103232 | 16111.14 | -1.3155  | 0.08271  | -15.9051 | 5.84E-57 | 4.01E-55 | 22018.46 | 24215.31 | 22725.37 | 9113.774 | 9401.391 | 9192.547 |
| 3671   | LOC10322  | 179.7869 | -1.31586 | 0.231675 | -5.67978 | 1.35E-08 | 9.77E-08 | 253.6964 | 234.2923 | 277.5968 | 122.767  | 106.9555 | 83.4133  |
| 2339   | EGR1      | 3106.849 | -1.31644 | 0.179008 | -7.35409 | 1.92E-13 | 2.18E-12 | 3430.865 | 6075.176 | 3795.91  | 1705.345 | 1777.601 | 1856.197 |
| 1736   | NELFA     | 822.4551 | -1.3171  | 0.152727 | -8.62383 | 6.47E-18 | 9.92E-17 | 1188.795 | 1115.078 | 1224.487 | 497.7643 | 367.927  | 540.679  |
| 23756  | LOC11962  | 0.891166 | -1.31743 | 2.966723 | -0.44407 | 0.656992 | 0.73526  | 3.794605 | 0.547412 | 0        | 0        | 0        | 1.004979 |
| 10300  | LOC10322  | 33.54649 | -1.31756 | 0.472457 | -2.78873 | 0.005291 | 0.013658 | 53.12446 | 42.15071 | 47.30973 | 20.08914 | 23.53022 | 15.07469 |
| 927    | NSF       | 5485.074 | -1.3184  | 0.116046 | -11.361  | 6.54E-30 | 1.88E-28 | 7484.044 | 9047.075 | 6963.575 | 3087.032 | 3035.398 | 3293.318 |
| 27476  | LOC11962  | 0.386998 | -1.32008 | 3.974316 | -0.33215 | 0.739774 | NA       | 1.626259 | 0        | 0.695731 | 0        | 0        | 0        |
| 29189  | LOC10321  | 0.386998 | -1.32008 | 3.974316 | -0.33215 | 0.739774 | NA       | 1.626259 | 0        | 0.695731 | 0        | 0        | 0        |
| 29203  | LOC11962  | 0.386998 | -1.32008 | 3.974316 | -0.33215 | 0.739774 | NA       | 1.626259 | 0        | 0.695731 | 0        | 0        | 0        |
| 15197  | LOC11962  | 15.38015 | -1.32021 | 0.734893 | -1.79647 | 0.07242  | 0.126689 | 28.18849 | 16.96977 | 20.87194 | 2.232127 | 14.97377 | 9.044815 |
| 15211  | XK        | 13.97822 | -1.32057 | 0.736007 | -1.79424 | 0.072775 | 0.127192 | 21.68345 | 21.34906 | 16.00182 | 13.39276 | 6.417332 | 5.024897 |
| 1367   | KDM7A     | 1597.919 | -1.32087 | 0.136711 | -9.66178 | 4.38E-22 | 8.52E-21 | 2061.012 | 2725.016 | 2062.148 | 886.1544 | 915.5394 | 937.6458 |
| 10505  | LIPI      | 31.78432 | -1.32124 | 0.481581 | -2.74354 | 0.006078 | 0.015382 | 44.45108 | 48.17224 | 42.43961 | 22.32127 | 19.252   | 14.06971 |
| 23690  | LOC11961  | 0.902361 | -1.32185 | 2.906259 | -0.45483 | 0.649233 | 0.728571 | 1.626259 | 0        | 2.782925 | 0        | 0        | 1.004979 |
| 23438  | TRNAG-CC  | 1.171625 | -1.3226  | 2.678917 | -0.49371 | 0.621513 | 0.704906 | 2.710432 | 0        | 2.087194 | 2.232127 | 0        | 0        |
| 27038  | TRNAL-UA  | 0.387886 | -1.32323 | 3.883528 | -0.34073 | 0.733308 | NA       | 1.084173 | 0.547412 | 0.695731 | 0        | 0        | 0        |
| 29548  | LOC11962  | 0.387886 | -1.32323 | 3.883528 | -0.34073 | 0.733308 | NA       | 1.084173 | 0.547412 | 0.695731 | 0        | 0        | 0        |
| 718    | FBL       | 4743.033 | -1.32361 | 0.104521 | -12.6637 | 9.40E-37 | 3.48E-35 | 7153.372 | 6644.485 | 6548.224 | 2537.928 | 2556.237 | 3017.953 |
| 578    | AQP1      | 24970.69 | -1.32421 | 0.095763 | -13.828  | 1.73E-43 | 7.94E-42 | 37771.49 | 33440.29 | 35864.26 | 13997.67 | 13298.85 | 15451.56 |
| 8591   | LOC10324  | 47.6223  | -1.32461 | 0.409815 | -3.23222 | 0.001228 | 0.003801 | 79.14461 | 55.28859 | 70.9646  | 26.78552 | 21.39111 | 32.15934 |
| 14213  | LOC11962  | 17.39932 | -1.32492 | 0.670915 | -1.9748  | 0.048291 | 0.090326 | 34.15144 | 22.9913  | 17.39328 | 13.39276 | 6.417332 | 10.04979 |
| 2086   | TOMM7     | 3750.99  | -1.32529 | 0.16959  | -7.81464 | 5.51E-15 | 7.02E-14 | 6558.703 | 3861.99  | 5669.515 | 2198.645 | 1867.444 | 2349.642 |
| 3050   | PDE7B     | 216.2978 | -1.32552 | 0.209107 | -6.33897 | 2.31E-10 | 2.02E-09 | 305.1946 | 315.3092 | 304.0346 | 113.8385 | 151.8769 | 107.5328 |
| 3666   | LOC10324  | 217.8936 | -1.3256  | 0.233255 | -5.68307 | 1.32E-08 | 9.59E-08 | 365.9083 | 235.9345 | 332.5596 | 131.6955 | 117.6511 | 123.6125 |
| 26731  | LOC11961  | 0.388774 | -1.32632 | 3.880395 | -0.3418  | 0.732502 | NA       | 0.542086 | 1.094824 | 0.695731 | 0        | 0        | 0        |
| 7142   | LOC11961  | 65.13981 | -1.32659 | 0.360144 | -3.68349 | 0.00023  | 0.000856 | 110.0435 | 76.63765 | 91.14081 | 37.94616 | 44.92132 | 30.14938 |
| 4047   | LOC11962  | 153.6687 | -1.32722 | 0.24867  | -5.33727 | 9.44E-08 | 6.20E-07 | 197.8615 | 258.3784 | 203.1536 | 100.4457 | 72.72976 | 89.44317 |
| 1657   | CCT6B     | 633.9022 | -1.3273  | 0.150371 | -8.82686 | 1.08E-18 | 1.73E-17 | 981.1763 | 778.967  | 960.1093 | 377.2295 | 340.1186 | 365.8125 |
| 2013   | ZBTB8A    | 385.4315 | -1.32791 | 0.167128 | -7.94545 | 1.93E-15 | 2.56E-14 | 544.7968 | 599.9633 | 507.8839 | 200.8914 | 245.9977 | 213.0556 |
| 1885   | PABPC1    | 18515.34 | -1.32824 | 0.161464 | -8.22626 | 1.93E-16 | 2.72E-15 | 20826.42 | 35232.52 | 23393.27 | 10051.27 | 10629.24 | 10959.3  |
| 1204   | CCNJL     | 1296.863 | -1.32838 | 0.131075 | -10.1345 | 3.88E-24 | 8.58E-23 | 1748.771 | 2089.471 | 1731.675 | 754.4589 | 658.8461 | 797.9537 |
| 27119  | LOC11962  | 0.389661 | -1.32937 | 3.973887 | -0.33453 | 0.737983 | NA       | 0        | 1.642235 | 0.695731 | 0        | 0        | 0        |
| 3308   | GTPBP6    | 342.1933 | -1.33103 | 0.220608 | -6.03347 | 1.60E-09 | 1.29E-08 | 581.6587 | 364.5763 | 527.3644 | 171.8738 | 177.5462 | 230.1403 |
| 14848  | LOC11962  | 17.45117 | -1.33137 | 0.714843 | -1.86247 | 0.062537 | 0.11197  | 24.93597 | 21.34906 | 27.13352 | 11.16063 | 17.11289 | 3.014938 |
| 16046  | LOC11962  | 10.70077 | -1.33219 | 0.803743 | -1.65748 | 0.097422 | 0.161409 | 16.80468 | 14.78012 | 14.61036 | 6.696381 | 4.278221 | 7.034856 |
| 20793  | LOC11962  | 3.256592 | -1.33221 | 1.471209 | -0.90552 | 0.365189 | 0.466919 | 3.252518 | 5.474118 | 5.565851 | 2.232127 | 0        | 3.014938 |
| 5456   | CABLES1   | 92.8359  | -1.33285 | 0.3004   | -4.43693 | 9.13E-06 | 4.45E-05 | 136.0637 | 119.3358 | 141.2335 | 66.96381 | 49.19955 | 44.2191  |
| 10298  | LOC10323  | 43.88292 | -1.33321 | 0.477966 | -2.78934 | 0.005281 | 0.013635 | 64.50828 | 63.49977 | 58.44144 | 17.85702 | 44.92132 | 14.06971 |
| 6609   | MYO5C     | 95.1442  | -1.33428 | 0.342199 | -3.89913 | 9.65E-05 | 0.000388 | 135.5216 | 147.8012 | 121.753  | 51.33892 | 81.28621 | 33.16432 |
| 14611  | LOC10321  | 15.23855 | -1.33436 | 0.700525 | -1.9048  | 0.056806 | 0.103356 | 21.14137 | 22.44388 | 20.87194 | 13.39276 | 8.556443 | 5.024897 |
| 964    | PRDM5     | 1428.965 | -1.33518 | 0.119804 | -11.1447 | 7.60E-29 | 2.09E-27 | 1896.76  | 2261.358 | 1983.53  | 756.691  | 851.366  | 824.0832 |
| 11779  | LOC11962  | 25.99717 | -1.33556 | 0.544401 | -2.45326 | 0.014157 | 0.031951 | 36.31979 | 30.65506 | 45.91827 | 11.16063 | 12.83466 | 19.09461 |
| 703    | RPA2      | 1535.006 | -1.33642 | 0.104268 | -12.8171 | 1.31E-37 | 4.97E-36 | 2271.884 | 2185.268 | 2144.94  | 848.2083 | 849.2269 | 910.5114 |
| 14250  | LOC10324  | 16.57892 | -1.33645 | 0.679027 | -1.96819 | 0.049046 | 0.091502 | 31.44101 | 22.44388 | 16.69755 | 11.16063 | 10.69555 | 7.034856 |
| 1534   | SRSF4     | 2646.736 | -1.33703 | 0.146217 | -9.14417 | 6.01E-20 | 1.04E-18 | 3312.69  | 4748.797 | 3317.247 | 1477.668 | 1465.291 | 1558.723 |
| 16347  | RPE65     | 12.0066  | -1.33705 | 0.837646 | -1.5962  | 0.110444 | 0.179615 | 14.09425 | 19.70683 | 16.69755 | 6.696381 | 12.83466 | 2.009959 |
| 11501  | LOC11962  | 33.00506 | -1.33778 | 0.531691 | -2.51609 | 0.011867 | 0.02743  | 54.75072 | 42.69812 | 43.13534 | 11.16063 | 34.22577 | 12.05975 |
| 9132   | RSPH9     | 52.921   | -1.33801 | 0.435501 | -3.07234 | 0.002124 | 0.006183 | 89.98634 | 53.09895 | 84.87923 | 15.62489 | 42.78221 | 31.15436 |
| 9615   | LOC11962  | 36.28674 | -1.33835 | 0.452692 | -2.95644 | 0.003112 | 0.008606 | 49.32986 | 59.12048 | 48.00546 | 15.62489 | 23.53022 | 22.10955 |
| 21793  | LOC11962  | 2.348374 | -1.34059 | 1.762486 | -0.76062 | 0.446883 | 0.545147 | 3.252518 | 4.379295 | 2.087194 | 2.232127 | 2.139111 | 0        |
| 3803   | PDK3      | 139.1521 | -1.3407  | 0.242056 | -5.5388  | 3.05E-08 | 2.13E-07 | 189.1881 | 188.8571 | 219.8511 | 80.35657 | 81.28621 | 75.37346 |
| 5404   | JAZF1     | 90.23945 | -1.34082 | 0.300568 | -4.46094 | 8.16E-06 | 4.01E-05 | 125.764  | 139.0426 | 121.753  | 64.73168 | 44.92132 | 45.22408 |
| 5368   | LOC11962  | 99.59075 | -1.34199 | 0.299524 | -4.4804  | 7.45E-06 | 3.69E-05 | 151.2421 | 151.6331 | 123.1445 | 53.57105 | 72.72976 | 45.22408 |
| 11734  | LOC11962  | 38.23326 | -1.34211 | 0.545092 | -2.46217 | 0.01381  | 0.031288 | 58.54533 | 35.58177 | 73.05179 | 8.928508 | 17.11289 | 36.17926 |
| 2945   | SPOCK2    | 243.7943 | -1.34228 | 0.20674  | -6.49262 | 8.44E-11 | 7.61E-10 | 378.9184 | 325.71   | 349.2571 | 131.6955 | 113.3729 | 163.8117 |
| 3856   | LOC10323  | 134.874  | -1.34229 | 0.244553 | -5.48875 | 4.05E-08 | 2.79E-07 | 189.1881 | 192.1415 | 196.892  | 78.12444 | 85.56443 | 67.33362 |
| 20142  | LOC11962  | 3.732845 | -1.34265 | 1.335964 | -1.005   | 0.314896 | 0.415625 | 5.420864 | 7.116354 | 3.478657 | 2.232127 | 2.139111 | 2.009959 |
| 11128  | LOC10323  | 28.68164 | -1.34297 | 0.517142 | -2.5969  | 0.009407 | 0.022473 | 39.5723  | 42.15071 | 41.04815 | 24.5534  | 10.69555 | 14.06971 |
| 1960   | HIST3H2BE | 1228.682 | -1.34344 | 0.166445 | -8.07141 | 6.95E-16 | 9.43E-15 | 1997.046 | 1345.538 | 1950.831 | 676.3345 | 622.4812 | 779.8641 |
| 7387   | LOC10323  | 57.55822 | -1.34382 | 0.372787 | -3.6048  | 0.000312 | 0.001124 | 83.4813  | 72.80577 | 93.228   | 24.5534  | 32.08666 | 39.1942  |
| 5785   | LOC10324  | 152.277  | -1.34445 | 0.313904 | -4.28299 | 1.84E-05 | 8.47E-05 | 157.205  | 320.2359 | 176.7158 | 82.5887  | 100.5382 | 76.37844 |
| 851    | LOC10324  | 955.7941 | -1.34566 | 0.114214 | -11.7819 | 4.84E-32 | 1.51E-30 | 1385.031 | 1370.719 | 1359.459 | 555.7996 | 524.0821 | 539.674  |
| 13790  | LOC11962  | 16.37205 | -1.34672 | 0.657574 | -2.04801 | 0.040559 | 0.078191 | 24.39389 | 26.82318 | 19.48048 | 8.928508 | 8.556443 | 10.04979 |
| 3106   | HYDIN     | 275.1804 | -1.34685 | 0.214714 | -6.27277 | 3.55E-10 | 3.04E-09 | 371.8712 | 437.382  | 370.8248 | 147.3204 | 201.0764 | 122.6075 |
| 632    | PRELID3B  | 3129.694 | -1.3481  | 0.101608 | -13.2677 | 3.56E-40 | 1.50E-38 | 4404.452 | 4573.626 | 4494.425 | 1776.773 | 1920.921 | 1607.967 |
| 3049   | EFCAB8    | 288.3829 | -1.34971 | 0.21281  | -6.34233 | 2.26E-10 | 1.97E-09 | 489.504  | 336.1109 | 414.6559 | 151.7846 | 192.52   | 145.722  |
| 16258  | LOC11962  | 11.57481 | -1.35045 | 0.835891 | -1.61559 | 0.106184 | 0.173631 | 10.29964 | 21.34906 | 17.39328 | 6.696381 | 10.69555 | 3.014938 |
| 933    | NCKAP5    | 6942.615 | -1.35049 | 0.119383 | -11.3122 | 1.14E-29 | 3.25E-28 | 8859.86  | 11772.09 | 9291.492 | 3881.669 | 3839.704 | 4010.873 |
| 1033   | LOC10323  | 720.3827 | -1.35238 | 0.124666 | -10.848  | 2.04E-27 | 5.24E-26 | 1009.907 | 1033.514 | 1062.382 | 401.7829 | 410.7092 | 404.0017 |
| 9534   | LOC10324  | 36.97444 | -1.35377 | 0.454929 | -2.97578 | 0.002922 | 0.008149 | 63.96619 | 44.88777 | 50.09266 | 24.5534  | 19.252   | 19.09461 |
| 1334</ |           |          |          |          |          |          |          |          |          |          |          |          |          |



|       |           |          |          |          |          |          |          |          |          |          |          |          |          |
|-------|-----------|----------|----------|----------|----------|----------|----------|----------|----------|----------|----------|----------|----------|
| 5364  | LOC119622 | 118.295  | -1.35471 | 0.302218 | -4.48255 | 7.38E-06 | 3.66E-05 | 176.7202 | 122.0728 | 212.8938 | 66.96381 | 57.75599 | 73.3635  |
| 2324  | TMEM14A   | 454.8932 | -1.35512 | 0.18371  | -7.37642 | 1.63E-13 | 1.86E-12 | 712.8436 | 534.8213 | 710.3417 | 299.105  | 248.1368 | 224.1104 |
| 9996  | LOC10324  | 32.45901 | -1.35532 | 0.473531 | -2.86216 | 0.004208 | 0.01119  | 46.07734 | 50.9093  | 42.43961 | 17.85702 | 21.39111 | 16.07967 |
| 4036  | LOC11962  | 272.0046 | -1.35578 | 0.253642 | -5.34525 | 9.03E-08 | 5.95E-07 | 307.9051 | 550.1489 | 314.4706 | 165.1774 | 147.5986 | 146.727  |
| 11253 | LPA       | 28.42141 | -1.35648 | 0.527895 | -2.56961 | 0.010181 | 0.024055 | 43.36691 | 33.93953 | 43.83108 | 20.08914 | 19.252   | 10.04979 |
| 380   | UAP1      | 4499.078 | -1.35649 | 0.084499 | -16.0534 | 5.41E-58 | 3.78E-56 | 6421.013 | 6578.248 | 6412.556 | 2491.054 | 2586.185 | 2505.414 |
| 3046  | RAB11FIP4 | 224.8922 | -1.35658 | 0.213787 | -6.34546 | 2.22E-10 | 1.94E-09 | 313.868  | 370.0504 | 287.3371 | 140.624  | 104.8164 | 132.6573 |
| 2614  | SNAI2     | 389.8046 | -1.35727 | 0.195072 | -6.95779 | 3.46E-12 | 3.52E-11 | 492.7565 | 702.8768 | 486.3162 | 212.0521 | 226.7457 | 218.0805 |
| 21017 | LOC11962  | 3.099955 | -1.35764 | 1.546822 | -0.8777  | 0.380108 | 0.480804 | 5.420864 | 4.926706 | 2.782925 | 4.464254 | 0        | 1.004979 |
| 7420  | LOC11962  | 61.0097  | -1.35821 | 0.37809  | -3.59228 | 0.000328 | 0.001174 | 88.36008 | 65.14201 | 109.2298 | 37.94616 | 34.22577 | 31.15436 |
| 7668  | LARGE2    | 54.40105 | -1.3585  | 0.387745 | -3.5036  | 0.000459 | 0.001591 | 81.85504 | 69.5213  | 82.79203 | 22.32127 | 42.78221 | 27.13445 |
| 6756  | FOXN3     | 77.86014 | -1.35861 | 0.354493 | -3.83255 | 0.000127 | 0.000499 | 98.11763 | 140.6848 | 94.61947 | 49.10679 | 53.47777 | 31.15436 |
| 903   | HIST1H2AF | 3596.684 | -1.3587  | 0.118621 | -11.4541 | 2.24E-30 | 6.60E-29 | 5281.547 | 4463.049 | 5777.353 | 2015.611 | 2139.111 | 1903.431 |
| 15798 | LOC10321  | 13.0438  | -1.35912 | 0.798498 | -1.7021  | 0.088737 | 0.149327 | 19.51511 | 24.63353 | 13.2189  | 6.696381 | 2.139111 | 12.05975 |
| 7540  | LOC10322  | 4570.922 | -1.36074 | 0.383707 | -3.54629 | 0.000391 | 0.001378 | 8180.083 | 3466.759 | 8092.747 | 2506.679 | 2573.35  | 2605.912 |
| 846   | RPS27A    | 31760.89 | -1.36104 | 0.115397 | -11.7944 | 4.17E-32 | 1.31E-30 | 48007.71 | 38235.07 | 50919.88 | 18198.53 | 18238.06 | 16966.06 |
| 17705 | LOC10324  | 9.314416 | -1.36359 | 0.98563  | -1.38347 | 0.166519 | 0.250038 | 24.39389 | 10.40082 | 4.87012  | 8.928508 | 4.278221 | 3.014938 |
| 1022  | ELK3      | 3992.096 | -1.3637  | 0.125102 | -10.9007 | 1.14E-27 | 2.97E-26 | 5314.615 | 6810.35  | 5128.236 | 2154.003 | 2194.728 | 2350.647 |
| 7454  | LOC10322  | 91.44312 | -1.36423 | 0.381066 | -3.58004 | 0.000344 | 0.001225 | 113.2961 | 181.7407 | 96.70666 | 64.73168 | 62.03421 | 30.14938 |
| 2185  | ASPSR1    | 344.6368 | -1.3648  | 0.17859  | -7.64207 | 2.14E-14 | 2.60E-13 | 551.3018 | 434.645  | 500.9266 | 203.1236 | 198.9373 | 178.8863 |
| 2289  | LOC10322  | 620.2875 | -1.3655  | 0.183557 | -7.4391  | 1.01E-13 | 1.18E-12 | 788.7357 | 1139.711 | 754.8685 | 339.2833 | 327.2839 | 371.8424 |
| 11553 | LOC11961  | 35.96264 | -1.3656  | 0.545365 | -2.50401 | 0.012279 | 0.028258 | 37.40396 | 74.44801 | 42.43961 | 35.71403 | 10.69555 | 15.07469 |
| 1038  | ACSL6     | 799.1467 | -1.36639 | 0.126278 | -10.8205 | 2.75E-27 | 7.05E-26 | 1166.57  | 1173.104 | 1109.692 | 457.586  | 474.8826 | 413.0466 |
| 15741 | RNLS      | 11.83143 | -1.36674 | 0.798873 | -1.71084 | 0.087111 | 0.147122 | 17.88885 | 12.04306 | 20.87194 | 4.464254 | 10.69555 | 5.024897 |
| 9688  | DCHS1     | 40.94884 | -1.36756 | 0.466076 | -2.93419 | 0.003344 | 0.009177 | 62.33993 | 50.9093  | 61.92009 | 20.08914 | 36.36488 | 14.06971 |
| 1433  | PRR11     | 1462.427 | -1.36768 | 0.145022 | -9.4308  | 4.07E-21 | 7.55E-20 | 2013.851 | 2538.349 | 1772.028 | 785.7087 | 838.5314 | 826.0931 |
| 911   | FAM118B   | 1418.16  | -1.36812 | 0.119827 | -11.4175 | 3.42E-30 | 9.97E-29 | 2103.295 | 1840.399 | 2185.988 | 850.4404 | 770.0798 | 758.7595 |
| 5444  | LOC10323  | 95.49994 | -1.36838 | 0.308044 | -4.44215 | 8.91E-06 | 4.35E-05 | 137.1479 | 117.6935 | 160.0182 | 37.94616 | 59.8951  | 60.29877 |
| 4048  | LOC11961  | 138.356  | -1.3684  | 0.256409 | -5.33679 | 9.46E-08 | 6.21E-07 | 221.1712 | 172.9821 | 205.9365 | 82.5887  | 62.03421 | 85.42325 |
| 804   | POLQ      | 3919.017 | -1.36852 | 0.113409 | -12.0672 | 1.57E-33 | 5.21E-32 | 5570.48  | 6339.029 | 5039.182 | 2069.182 | 2329.492 | 2166.736 |
| 1627  | ARID1A    | 1972.626 | -1.36881 | 0.153663 | -8.90785 | 5.20E-19 | 8.50E-18 | 2369.46  | 3576.241 | 2586.729 | 1147.313 | 1037.469 | 1118.542 |
| 1299  | LOC10324  | 605.4582 | -1.36919 | 0.138859 | -9.86026 | 6.19E-23 | 1.27E-21 | 860.2911 | 907.6088 | 850.8795 | 370.5331 | 303.7537 | 339.6831 |
| 5543  | TRNAC-GC  | 119.043  | -1.36946 | 0.311589 | -4.3951  | 1.11E-05 | 5.31E-05 | 197.3194 | 126.9995 | 193.4133 | 69.19594 | 44.92132 | 82.40832 |
| 12182 | LOC10322  | 2154.239 | -1.36977 | 0.577919 | -2.37017 | 0.01778  | 0.038801 | 4052.638 | 1089.35  | 4177.867 | 1203.116 | 1024.634 | 1377.827 |
| 980   | SMYD2     | 957.3972 | -1.37006 | 0.123565 | -11.0878 | 1.44E-28 | 3.90E-27 | 1463.633 | 1279.849 | 1402.594 | 517.8535 | 517.6648 | 562.7885 |
| 15858 | ZNF135    | 10.69258 | -1.3702  | 0.81095  | -1.68963 | 0.091099 | 0.152715 | 14.09425 | 13.13788 | 18.78475 | 6.696381 | 6.417332 | 5.024897 |
| 14617 | LOC11962  | 16.42453 | -1.37022 | 0.719506 | -1.9044  | 0.056859 | 0.103413 | 27.10432 | 20.25424 | 25.04633 | 8.928508 | 2.139111 | 15.07469 |
| 5525  | LOC10324  | 122.1483 | -1.37176 | 0.311672 | -4.4013  | 1.08E-05 | 5.18E-05 | 151.2421 | 240.8612 | 136.3633 | 55.80317 | 81.28621 | 67.33362 |
| 22654 | LOC10322  | 1.483351 | -1.37223 | 2.23399  | -0.61425 | 0.539048 | 0.632586 | 2.168345 | 0.547412 | 4.174388 | 0        | 0        | 2.009959 |
| 15820 | TRNAY-GU  | 11.38222 | -1.37377 | 0.809861 | -1.6963  | 0.089829 | 0.150954 | 20.0572  | 10.40082 | 18.78475 | 4.464254 | 8.556443 | 6.029877 |
| 22944 | LOC11961  | 1.198121 | -1.3738  | 2.401825 | -0.57198 | 0.567336 | 0.657367 | 1.626259 | 0.547412 | 2.782925 | 2.232127 | 0        | 0        |
| 10406 | LOC11962  | 35.85105 | -1.37468 | 0.497163 | -2.76504 | 0.005692 | 0.014541 | 64.50828 | 36.12918 | 55.65851 | 11.16063 | 23.53022 | 24.11951 |
| 14230 | DMGDH     | 17.21162 | -1.37471 | 0.697602 | -1.97062 | 0.048768 | 0.091103 | 26.56223 | 22.9913  | 23.65487 | 8.928508 | 17.11289 | 4.019918 |
| 536   | COL4A2    | 8180.278 | -1.37495 | 0.096645 | -14.2268 | 6.25E-46 | 3.10E-44 | 12083.65 | 11445.29 | 11907.44 | 4372.737 | 4254.691 | 5017.862 |
| 10111 | LOC10324  | 33.29465 | -1.37514 | 0.484982 | -2.83545 | 0.004576 | 0.012032 | 50.41403 | 39.41365 | 53.57132 | 15.62489 | 25.66933 | 15.07469 |
| 2277  | TNXB      | 254.6345 | -1.37572 | 0.184555 | -7.45426 | 9.04E-14 | 1.06E-12 | 361.0295 | 359.1022 | 381.9565 | 136.1597 | 151.8769 | 137.6822 |
| 2325  | RALGPS2   | 362.9786 | -1.37609 | 0.186602 | -7.37447 | 1.65E-13 | 1.89E-12 | 492.2144 | 626.7865 | 452.2254 | 207.5878 | 201.0764 | 197.981  |
| 8317  | LOC10322  | 114.0581 | -1.37641 | 0.416041 | -3.30835 | 0.000938 | 0.003    | 222.7975 | 64.59459 | 208.0237 | 55.80317 | 57.75599 | 75.37346 |
| 2012  | MED18     | 446.2345 | -1.37722 | 0.173331 | -7.94558 | 1.93E-15 | 2.55E-14 | 718.8065 | 553.4333 | 658.1619 | 234.3733 | 284.5017 | 228.1303 |
| 21922 | TRNAV-CA  | 1.911255 | -1.37722 | 1.859014 | -0.74083 | 0.458795 | 0.55635  | 2.710432 | 2.737059 | 2.782925 | 2.232127 | 0        | 1.004979 |
| 10593 | GAL       | 35.96551 | -1.37853 | 0.506148 | -2.72357 | 0.006458 | 0.016208 | 46.61943 | 49.81448 | 57.7457  | 35.71403 | 12.83466 | 13.06473 |
| 5399  | EFNB3     | 110.2021 | -1.37902 | 0.308924 | -4.46393 | 8.05E-06 | 3.96E-05 | 139.3162 | 190.4993 | 144.7121 | 58.0353  | 83.42532 | 45.22408 |
| 1786  | LOC11962  | 380.7104 | -1.37986 | 0.162407 | -8.49631 | 1.96E-17 | 2.91E-16 | 540.4601 | 514.0197 | 595.5461 | 220.9806 | 203.2155 | 210.0407 |
| 3611  | PFKFB1    | 147.6494 | -1.38209 | 0.241269 | -5.72841 | 1.01E-08 | 7.46E-08 | 206.5349 | 202.5424 | 230.9828 | 95.98146 | 68.45154 | 81.40334 |
| 16360 | NUPR1     | 9.733801 | -1.38356 | 0.867509 | -1.59487 | 0.110741 | 0.179954 | 10.84173 | 15.87494 | 16.00182 | 2.232127 | 6.417332 | 7.034856 |
| 783   | AFAP1     | 163.5842 | -1.38367 | 0.1134   | -12.2017 | 3.04E-34 | 1.03E-32 | 2428.005 | 2463.353 | 2342.528 | 839.2797 | 896.2874 | 1023.069 |
| 1254  | PXDC1     | 1271.714 | -1.384   | 0.138511 | -9.99204 | 1.65E-23 | 3.50E-22 | 1973.194 | 1671.796 | 1881.258 | 676.3345 | 609.6465 | 818.0533 |
| 17312 | LOC10324  | 9.160667 | -1.38436 | 0.957187 | -1.44628 | 0.1481   | 0.227415 | 18.97302 | 15.87494 | 5.565851 | 2.232127 | 4.278221 | 8.039836 |
| 1107  | H1FX      | 3292.704 | -1.38441 | 0.131774 | -10.506  | 8.11E-26 | 1.95E-24 | 5157.41  | 3935.891 | 5195.722 | 1886.147 | 1636.42  | 1944.635 |
| 10750 | TERT      | 42.01711 | -1.38564 | 0.517162 | -2.67932 | 0.007377 | 0.018244 | 63.42411 | 43.24553 | 73.05179 | 31.24978 | 32.08666 | 9.044815 |
| 15081 | CTHRC1    | 14.35497 | -1.38761 | 0.762695 | -1.81935 | 0.068858 | 0.121384 | 26.56223 | 14.23271 | 20.87194 | 4.464254 | 14.97377 | 5.024897 |
| 1400  | RPL9      | 54065.78 | -1.38863 | 0.14577  | -9.52613 | 1.63E-21 | 3.10E-20 | 86082.23 | 57891.54 | 90765.11 | 30767.64 | 30150.76 | 28737.39 |
| 6519  | FAM71E2   | 65.21978 | -1.38921 | 0.35334  | -3.93163 | 8.44E-05 | 0.000344 | 103.5385 | 75.54283 | 103.664  | 40.17829 | 34.22577 | 34.1693  |
| 3352  | IQCA1     | 167.6586 | -1.39041 | 0.232084 | -5.991   | 2.09E-09 | 1.65E-08 | 226.5921 | 257.831  | 242.1145 | 113.8385 | 79.14709 | 86.42823 |
| 949   | LOC10324  | 873.5104 | -1.39124 | 0.124159 | -11.2053 | 3.84E-29 | 1.08E-27 | 1267.94  | 1274.375 | 1250.229 | 446.4254 | 534.7777 | 467.3155 |
| 1020  | DGKE      | 1066.731 | -1.39182 | 0.127574 | -10.9099 | 1.03E-27 | 2.69E-26 | 1567.714 | 1666.322 | 1401.899 | 535.7105 | 626.7594 | 601.9827 |
| 3311  | LOC11962  | 163.5804 | -1.39192 | 0.230764 | -6.03178 | 1.62E-09 | 1.30E-08 | 227.1342 | 257.2836 | 227.5042 | 98.21359 | 74.86887 | 96.47803 |
| 5989  | POLN      | 70.28484 | -1.392   | 0.333921 | -4.16864 | 3.06E-05 | 0.000136 | 105.1648 | 93.60742 | 107.1426 | 44.64254 | 29.94755 | 41.20416 |
| 1185  | EVC2      | 998.0392 | -1.39229 | 0.136505 | -10.1995 | 1.99E-24 | 4.47E-23 | 1421.893 | 1637.856 | 1278.059 | 515.6213 | 569.0034 | 565.8034 |
| 1452  | TNN       | 587.8988 | -1.39253 | 0.148786 | -9.35929 | 8.03E-21 | 1.47E-19 | 830.4763 | 927.863  | 801.4825 | 314.7299 | 293.0582 | 359.7826 |
| 17164 | LOC11962  | 8.196445 | -1.39277 | 0.945797 | -1.47259 | 0.140862 | 0.218163 | 7.589209 | 13.6853  | 13.9146  |          |          |          |



|       |           |          |          |          |          |          |          |          |          |          |          |          |          |
|-------|-----------|----------|----------|----------|----------|----------|----------|----------|----------|----------|----------|----------|----------|
| 16776 | LOC119621 | 9.098592 | -1.39486 | 0.912112 | -1.52926 | 0.1262   | 0.199989 | 7.589209 | 19.70683 | 12.52316 | 4.464254 | 4.278221 | 6.029877 |
| 626   | SMTN      | 1737.051 | -1.39717 | 0.104885 | -13.3209 | 1.75E-40 | 7.43E-39 | 2520.16  | 2531.232 | 2506.024 | 1002.225 | 872.7572 | 989.9048 |
| 14875 | TRNAA-AG  | 13.01875 | -1.39771 | 0.751976 | -1.85871 | 0.063068 | 0.112717 | 18.43094 | 14.78012 | 23.65487 | 8.928508 | 4.278221 | 8.039836 |
| 3397  | LOC103231 | 151.3306 | -1.39814 | 0.235065 | -5.94788 | 2.72E-09 | 2.13E-08 | 215.2083 | 239.219  | 202.4578 | 89.28508 | 83.42532 | 78.3884  |
| 513   | AGAP1     | 5210.173 | -1.39852 | 0.097022 | -14.4144 | 4.20E-47 | 2.18E-45 | 7313.287 | 8101.147 | 7257.87  | 2741.052 | 2791.539 | 3056.143 |
| 622   | PTP4A2    | 9431.988 | -1.40057 | 0.104653 | -13.383  | 7.60E-41 | 3.25E-39 | 12776.98 | 15508.72 | 12761.8  | 5169.606 | 5050.44  | 5324.381 |
| 14200 | LOC119621 | 18.10253 | -1.40118 | 0.708751 | -1.97697 | 0.048045 | 0.089947 | 31.44101 | 21.34906 | 24.3506  | 15.62489 | 12.83466 | 3.014938 |
| 13675 | SRPX      | 16.11522 | -1.40395 | 0.677163 | -2.07328 | 0.038146 | 0.074158 | 18.43094 | 29.56024 | 22.2634  | 6.696381 | 10.69555 | 9.044815 |
| 9376  | LOC103221 | 54.1839  | -1.40505 | 0.466303 | -3.01316 | 0.002585 | 0.007331 | 96.49137 | 41.05589 | 100.1853 | 26.78552 | 21.39111 | 39.1942  |
| 716   | CDCA7     | 2017.598 | -1.40579 | 0.110874 | -12.6792 | 7.72E-37 | 2.87E-35 | 2758.135 | 3213.855 | 2821.191 | 1098.206 | 1052.442 | 1161.756 |
| 27608 | LOC103241 | 0.412606 | -1.40588 | 3.970451 | -0.35408 | 0.723275 | NA       | 1.084173 | 0        | 1.391463 | 0        | 0        | 0        |
| 29528 | LOC103221 | 0.412606 | -1.40588 | 3.970451 | -0.35408 | 0.723275 | NA       | 1.084173 | 0        | 1.391463 | 0        | 0        | 0        |
| 22566 | LOC119621 | 1.503089 | -1.4063  | 2.231077 | -0.63032 | 0.528484 | 0.622606 | 0.542086 | 4.379295 | 2.087194 | 0        | 0        | 2.009959 |
| 600   | LAMB1     | 10526.24 | -1.40682 | 0.103458 | -13.598  | 4.11E-42 | 1.82E-40 | 14980.01 | 16234.59 | 14659.06 | 5575.853 | 5275.047 | 6432.874 |
| 4914  | DQX1      | 109.7816 | -1.40703 | 0.297025 | -4.73708 | 2.17E-06 | 1.17E-05 | 166.4205 | 143.4219 | 166.9755 | 84.82083 | 42.78221 | 54.26889 |
| 1006  | EVL       | 883.6253 | -1.40726 | 0.128355 | -10.9638 | 5.70E-28 | 1.51E-26 | 1314.017 | 1300.65  | 1243.272 | 441.9611 | 464.187  | 537.664  |
| 23020 | LOC119621 | 0.944156 | -1.40743 | 2.518501 | -0.55883 | 0.576275 | 0.665491 | 1.626259 | 1.642235 | 1.391463 | 0        | 0        | 1.004979 |
| 23021 | LOC119621 | 0.944156 | -1.40743 | 2.518501 | -0.55883 | 0.576275 | 0.665491 | 1.626259 | 1.642235 | 1.391463 | 0        | 0        | 1.004979 |
| 6723  | SOHLH2    | 55.83087 | -1.40785 | 0.36597  | -3.8469  | 0.00012  | 0.000473 | 76.43418 | 78.27989 | 89.05362 | 31.24978 | 27.80844 | 32.15934 |
| 9683  | LOC103211 | 56.25682 | -1.40877 | 0.479873 | -2.93571 | 0.003328 | 0.009137 | 106.2489 | 41.05589 | 98.79385 | 15.62489 | 40.6431  | 35.17428 |
| 6439  | LOC119621 | 72.74912 | -1.40891 | 0.355333 | -3.96504 | 7.34E-05 | 0.000303 | 118.7169 | 101.2712 | 100.1853 | 24.5534  | 38.50399 | 53.26391 |
| 1100  | IL20RA    | 615.8031 | -1.40901 | 0.133957 | -10.5183 | 7.11E-26 | 1.72E-24 | 855.9544 | 940.4535 | 887.7532 | 339.2833 | 333.7013 | 337.6731 |
| 13947 | LOC103221 | 20.65502 | -1.40934 | 0.696771 | -2.02268 | 0.043107 | 0.082167 | 38.48813 | 26.82318 | 22.95914 | 13.39276 | 19.252   | 3.014938 |
| 984   | GARS1     | 21349.91 | -1.4112  | 0.127482 | -11.0698 | 1.76E-28 | 4.75E-27 | 28031.83 | 37706.82 | 27360.33 | 11537.86 | 11174.71 | 12287.88 |
| 2047  | MRPS23    | 1644.872 | -1.41121 | 0.178914 | -7.88766 | 3.08E-15 | 4.00E-14 | 2680.075 | 1655.921 | 2836.497 | 955.3503 | 844.9487 | 896.4417 |
| 3866  | LOC119621 | 125.0812 | -1.41151 | 0.257455 | -5.48258 | 4.19E-08 | 2.88E-07 | 174.0097 | 168.0554 | 203.8493 | 62.49956 | 72.72976 | 69.34358 |
| 1105  | HSPD1     | 27328.7  | -1.41165 | 0.134309 | -10.5105 | 7.73E-26 | 1.86E-24 | 34632.27 | 49471.8  | 35073.91 | 14564.63 | 14811.2  | 15418.4  |
| 28631 | LOC119621 | 0.414381 | -1.41176 | 3.970194 | -0.35559 | 0.722147 | NA       | 0        | 1.094824 | 1.391463 | 0        | 0        | 0        |
| 13897 | LOC119621 | 15.93843 | -1.41239 | 0.695749 | -2.03002 | 0.042354 | 0.081024 | 23.30971 | 20.80165 | 25.04633 | 4.464254 | 14.97377 | 7.034856 |
| 19015 | LOC119621 | 5.5877   | -1.41287 | 1.195576 | -1.18175 | 0.237307 | 0.33178  | 10.29964 | 3.831883 | 9.740239 | 2.232127 | 6.417332 | 1.004979 |
| 1031  | ZNF853    | 2427.71  | -1.41322 | 0.130086 | -10.8638 | 1.72E-27 | 4.42E-26 | 3268.239 | 4135.149 | 3192.016 | 1308.026 | 1225.71  | 1437.121 |
| 951   | TACC3     | 2117.221 | -1.41359 | 0.1262   | -11.2011 | 4.03E-29 | 1.13E-27 | 3255.771 | 2827.929 | 3160.708 | 1191.956 | 977.5736 | 1289.389 |
| 8073  | LGR6      | 46.21258 | -1.41377 | 0.416841 | -3.39162 | 0.000695 | 0.002288 | 77.51835 | 63.49977 | 59.8329  | 20.08914 | 34.22577 | 22.10955 |
| 14822 | LOC119621 | 15.05759 | -1.41418 | 0.756992 | -1.86815 | 0.061741 | 0.11074  | 30.35684 | 20.80165 | 14.61036 | 13.39276 | 2.139111 | 9.044815 |
| 5005  | LOC119611 | 86.39121 | -1.4145  | 0.301873 | -4.68574 | 2.79E-06 | 1.48E-05 | 124.6799 | 113.8617 | 138.4505 | 51.33892 | 42.78221 | 47.23404 |
| 1661  | CCDC138   | 454.4597 | -1.41478 | 0.160557 | -8.81171 | 1.23E-18 | 1.97E-17 | 678.6921 | 610.3642 | 690.8613 | 287.9444 | 226.7457 | 232.1503 |
| 5508  | ADRB2     | 85.84596 | -1.4156  | 0.321178 | -4.40754 | 1.05E-05 | 5.05E-05 | 116.0065 | 148.3486 | 112.7085 | 37.94616 | 42.78221 | 57.28383 |
| 740   | WWC2      | 10537.19 | -1.41653 | 0.113008 | -12.5347 | 4.82E-36 | 1.73E-34 | 14465.57 | 17517.18 | 14018.29 | 5428.533 | 5561.688 | 6231.878 |
| 1395  | PALM2AKA  | 5919.754 | -1.41677 | 0.148583 | -9.53524 | 1.50E-21 | 2.85E-20 | 7377.253 | 10950.43 | 7515.986 | 3203.102 | 3007.59  | 3464.164 |
| 1039  | LOC103211 | 855.5463 | -1.41701 | 0.130994 | -10.8173 | 2.85E-27 | 7.29E-26 | 1359.553 | 1153.397 | 1223.791 | 479.9073 | 434.2395 | 482.3901 |
| 2237  | LOC119621 | 250.8541 | -1.41728 | 0.18815  | -7.53272 | 4.97E-14 | 5.91E-13 | 376.75   | 344.8694 | 375.6949 | 129.4634 | 132.6249 | 145.722  |
| 8765  | LOC119621 | 40.1406  | -1.41763 | 0.445345 | -3.18321 | 0.001457 | 0.004418 | 63.96619 | 48.71965 | 64.00729 | 15.62489 | 21.39111 | 27.13445 |
| 2880  | LOC103211 | 261.4512 | -1.4177  | 0.215607 | -6.5754  | 4.85E-11 | 4.48E-10 | 316.5784 | 467.4897 | 356.9102 | 136.1597 | 151.8769 | 139.6921 |
| 5810  | SMCO2     | 70.02741 | -1.41846 | 0.332331 | -4.26822 | 1.97E-05 | 9.02E-05 | 102.4543 | 110.0298 | 94.61947 | 33.4819  | 36.36488 | 43.21412 |
| 2485  | FAM53A    | 392.1756 | -1.41893 | 0.198449 | -7.15012 | 8.67E-13 | 9.28E-12 | 643.4565 | 465.3    | 609.4607 | 200.8914 | 179.6853 | 254.2598 |
| 22893 | LOC119611 | 1.216971 | -1.41973 | 2.446608 | -0.58028 | 0.561723 | 0.652314 | 0.542086 | 3.831883 | 0.695731 | 2.232127 | 0        | 0        |
| 14595 | LOC103221 | 13.0925  | -1.41978 | 0.744233 | -1.90772 | 0.056428 | 0.102785 | 20.59928 | 15.32753 | 21.56767 | 4.464254 | 8.556443 | 8.039836 |
| 998   | MMP16     | 1073.999 | -1.41996 | 0.129187 | -10.9916 | 4.20E-28 | 1.12E-26 | 1542.236 | 1727.632 | 1424.162 | 535.7105 | 603.2292 | 611.0275 |
| 2601  | LOC103231 | 728.6507 | -1.42001 | 0.203495 | -6.97809 | 2.99E-12 | 3.06E-11 | 1253.846 | 739.0059 | 1193.875 | 395.0865 | 335.8404 | 454.2507 |
| 1465  | RAB9B     | 504.209  | -1.42015 | 0.152125 | -9.33546 | 1.01E-20 | 1.82E-19 | 739.9479 | 763.6395 | 695.0356 | 258.9267 | 314.4493 | 253.2548 |
| 9638  | LOC119621 | 93.40251 | -1.42034 | 0.48123  | -2.95148 | 0.003163 | 0.008723 | 85.10756 | 257.2836 | 64.00729 | 55.80317 | 62.03421 | 36.17926 |
| 14077 | MAGI2     | 16.96183 | -1.4206  | 0.710953 | -1.99816 | 0.045699 | 0.086305 | 24.93597 | 24.63353 | 22.95914 | 13.39276 | 12.83466 | 3.014938 |
| 3836  | TMEM232   | 156.6067 | -1.42237 | 0.258239 | -5.50797 | 3.63E-08 | 2.52E-07 | 204.9086 | 255.6413 | 219.8511 | 84.82083 | 109.0946 | 65.32367 |
| 2548  | LOC119621 | 209.3422 | -1.42357 | 0.201703 | -7.05776 | 1.69E-12 | 1.77E-11 | 307.9051 | 299.9817 | 308.209  | 100.4457 | 121.9293 | 117.5826 |
| 323   | PKIA      | 8669.725 | -1.42392 | 0.08438  | -16.8751 | 6.86E-64 | 5.64E-62 | 12800.29 | 12398.88 | 12704.75 | 4522.289 | 4639.731 | 4952.539 |
| 591   | HDCC2     | 3765.249 | -1.42466 | 0.104075 | -13.6889 | 1.18E-42 | 5.32E-41 | 5681.065 | 4910.284 | 5871.277 | 1986.593 | 2057.824 | 2084.327 |
| 848   | LARP6     | 1488.574 | -1.42665 | 0.121065 | -11.7842 | 4.71E-32 | 1.48E-30 | 2121.726 | 2319.384 | 2078.15  | 761.1553 | 746.5496 | 904.4815 |
| 13803 | RNF151    | 18.53364 | -1.4274  | 0.697473 | -2.04653 | 0.040705 | 0.078398 | 36.31979 | 18.612   | 27.13352 | 2.232127 | 12.83466 | 14.06971 |
| 454   | SLC39A10  | 9583.16  | -1.42785 | 0.094837 | -15.0558 | 3.16E-51 | 1.85E-49 | 13558.12 | 15139.22 | 13218.9  | 4995.5   | 5488.958 | 5098.261 |
| 1809  | TUB       | 321.5836 | -1.42996 | 0.169622 | -8.43027 | 3.45E-17 | 5.07E-16 | 451.0159 | 470.7742 | 484.229  | 167.4095 | 188.2417 | 167.8316 |
| 780   | LYPD1     | 5853.444 | -1.43103 | 0.117087 | -12.2219 | 2.37E-34 | 8.09E-33 | 7617.398 | 9965.632 | 8038.48  | 3160.692 | 3080.319 | 3258.143 |
| 621   | CETN3     | 2736.902 | -1.4313  | 0.106945 | -13.3835 | 7.55E-41 | 3.23E-39 | 3673.719 | 4391.338 | 3914.185 | 1435.258 | 1531.603 | 1475.31  |
| 5162  | LOC119611 | 117.6532 | -1.43176 | 0.311484 | -4.59657 | 4.30E-06 | 2.21E-05 | 140.9425 | 232.65   | 141.9292 | 51.33892 | 72.72976 | 66.32864 |
| 11745 | LOC119621 | 22.58141 | -1.43184 | 0.582197 | -2.45937 | 0.013918 | 0.031504 | 30.89892 | 37.77142 | 29.22072 | 17.85702 | 10.69555 | 9.044815 |
| 811   | NRP1      | 3596.238 | -1.43298 | 0.119249 | -12.0167 | 2.90E-33 | 9.52E-32 | 4854.383 | 6071.344 | 4824.897 | 1899.54  | 1861.026 | 2066.238 |
| 5418  | LOC119621 | 190.9228 | -1.43321 | 0.321929 | -4.45196 | 8.51E-06 | 4.18E-05 | 213.0399 | 433.0027 | 191.3261 | 80.35657 | 111.2338 | 116.5776 |
| 11201 | LOC119621 | 23.76864 | -1.43322 | 0.555041 | -2.58218 | 0.009818 | 0.023302 | 35.23561 | 35.03436 | 34.09084 | 15.62489 | 8.556443 | 14.06971 |
| 2467  | LOC119611 | 279.6673 | -1.43415 | 0.200056 | -7.16875 | 7.57E-13 | 8.16E-12 | 410.9015 | 343.2272 | 472.4016 | 145.0883 | 147.5986 | 158.7868 |
| 1213  | MLH1      | 847.9609 | -1.43611 | 0.141195 | -10.117  | 4.65E-24 | 1.02E-22 | 1285.829 | 1219.634 | 1212.66  | 511.1571 | 370.0661 | 488.42   |
| 9851  | KCNGB3    | 35.90169 | -1.43646 | 0.496682 | -2.8921  | 0.003827 | 0.010327 | 61.79785 | 52.00412 | 41.74388 | 17.85702 | 29.94755 | 12.05975 |
| 17640 | FAM124A   | 6.608667 | -1.43684 | 1.026701 | -1.39947 | 0.161671 | 0.243653 | 7.589209 | 10.40082 | 11.1317  | 2.232127 | 4.278221 | 4.019918 |
| 5388  | SARM1     | 88.52048 |          |          |          |          |          |          |          |          |          |          |          |



|       |           |          |          |          |          |          |          |          |          |          |          |          |          |
|-------|-----------|----------|----------|----------|----------|----------|----------|----------|----------|----------|----------|----------|----------|
| 20041 | LOC119624 | 5.125947 | -1.44177 | 1.411495 | -1.02145 | 0.307042 | 0.407281 | 5.96295  | 8.211177 | 7.653045 | 8.928508 | 0        | 0        |
| 18674 | LOC119624 | 5.137066 | -1.44265 | 1.171355 | -1.23161 | 0.218095 | 0.310471 | 8.673382 | 8.758589 | 4.87012  | 2.232127 | 4.278221 | 2.009959 |
| 10177 | LOC119624 | 35.86157 | -1.44294 | 0.511675 | -2.82003 | 0.004802 | 0.012544 | 65.05036 | 30.10765 | 61.22436 | 22.32127 | 21.39111 | 15.07469 |
| 4180  | CCDC148   | 109.9037 | -1.44571 | 0.275805 | -5.24179 | 1.59E-07 | 1.01E-06 | 137.1479 | 172.9821 | 171.8456 | 60.26743 | 59.8951  | 57.28383 |
| 869   | SLC41A1   | 2646.75  | -1.44759 | 0.123834 | -11.6898 | 1.44E-31 | 4.40E-30 | 3577.77  | 4506.294 | 3538.49  | 1453.115 | 1330.527 | 1474.305 |
| 1908  | LOC103234 | 530.3831 | -1.44807 | 0.176981 | -8.18203 | 2.79E-16 | 3.89E-15 | 707.9648 | 922.3889 | 697.1228 | 247.7661 | 333.7013 | 273.3544 |
| 7382  | LOC119624 | 48.71802 | -1.44818 | 0.401535 | -3.6066  | 0.00031  | 0.001117 | 73.18166 | 71.16354 | 68.87741 | 35.71403 | 19.252   | 24.11951 |
| 10350 | LOC103244 | 27.68662 | -1.44825 | 0.521581 | -2.77665 | 0.005492 | 0.014107 | 40.65648 | 33.39212 | 47.30973 | 17.85702 | 12.83466 | 14.06971 |
| 8870  | LOC103224 | 37.77944 | -1.44905 | 0.459901 | -3.15078 | 0.001628 | 0.00488  | 50.41403 | 49.81448 | 64.70302 | 17.85702 | 27.80844 | 16.07967 |
| 610   | FARP1     | 11666.98 | -1.44976 | 0.10742  | -13.4962 | 1.65E-41 | 7.17E-40 | 16604.11 | 17782.13 | 16870.09 | 6100.403 | 5550.992 | 7094.15  |
| 11898 | LOC119624 | 26.44277 | -1.45261 | 0.598889 | -2.42551 | 0.015287 | 0.034157 | 47.16151 | 24.63353 | 43.83108 | 24.5534  | 6.417332 | 12.05975 |
| 1973  | ANKEF1    | 308.9102 | -1.4542  | 0.180867 | -8.04016 | 8.97E-16 | 1.21E-14 | 405.4806 | 491.0284 | 459.1827 | 171.8738 | 171.1289 | 154.7668 |
| 750   | ATP8A1    | 1443.383 | -1.45426 | 0.116651 | -12.4667 | 1.13E-35 | 4.02E-34 | 2001.383 | 2324.858 | 2020.404 | 732.1376 | 793.6101 | 787.9039 |
| 13635 | RSPO2     | 15.61393 | -1.45439 | 0.698614 | -2.08182 | 0.037359 | 0.07284  | 16.26259 | 24.63353 | 27.13352 | 8.928508 | 10.69555 | 6.029877 |
| 9542  | LOC103214 | 31.60864 | -1.45447 | 0.489053 | -2.97405 | 0.002939 | 0.008188 | 44.99317 | 54.74118 | 38.96096 | 15.62489 | 19.252   | 16.07967 |
| 20825 | LOC103244 | 2.696569 | -1.45448 | 1.614364 | -0.90096 | 0.36761  | 0.469265 | 5.96295  | 3.284471 | 2.782925 | 0        | 2.139111 | 2.009959 |
| 510   | AMZ2      | 1912.264 | -1.45469 | 0.100727 | -14.4419 | 2.82E-47 | 1.47E-45 | 2763.556 | 2908.399 | 2739.79  | 999.9929 | 992.5473 | 1069.298 |
| 11066 | LOC103244 | 27.67274 | -1.45657 | 0.557533 | -2.61252 | 0.008988 | 0.021592 | 37.94605 | 42.15071 | 39.65669 | 17.85702 | 21.39111 | 7.034856 |
| 13102 | FBLN5     | 22.5007  | -1.45658 | 0.665915 | -2.18733 | 0.028718 | 0.058271 | 22.22554 | 40.50847 | 34.78657 | 8.928508 | 23.53022 | 5.024897 |
| 1569  | FAM184A   | 1381.504 | -1.45732 | 0.16101  | -9.05111 | 1.42E-19 | 2.40E-18 | 1773.707 | 2573.383 | 1729.588 | 703.12   | 761.5234 | 747.7047 |
| 521   | MTHFD1L   | 3581.991 | -1.45843 | 0.10153  | -14.3645 | 8.64E-47 | 4.41E-45 | 5411.106 | 5341.644 | 5014.136 | 1904.004 | 1749.793 | 2071.263 |
| 1266  | LOC103244 | 1469.001 | -1.45878 | 0.146668 | -9.94616 | 2.62E-23 | 5.50E-22 | 1935.248 | 2625.387 | 1902.825 | 814.7263 | 735.8541 | 799.9637 |
| 22694 | LOC119624 | 1.226188 | -1.45885 | 2.395196 | -0.60908 | 0.542474 | 0.635484 | 0.542086 | 3.284471 | 1.391463 | 0        | 2.139111 | 0        |
| 15764 | LOC119624 | 10.13242 | -1.45887 | 0.854411 | -1.70746 | 0.087736 | 0.147932 | 20.59928 | 12.59047 | 11.82743 | 4.464254 | 4.278221 | 7.034856 |
| 581   | GHITM     | 22943.46 | -1.45952 | 0.105756 | -13.8009 | 2.52E-43 | 1.15E-41 | 36075.31 | 29021.04 | 35860.08 | 12203.04 | 11882.76 | 12618.52 |
| 19279 | LOC103224 | 4.46251  | -1.45973 | 1.281409 | -1.13916 | 0.254637 | 0.351103 | 3.794605 | 7.116354 | 8.348776 | 2.232127 | 4.278221 | 1.004979 |
| 6659  | TRNAC-GC  | 63.712   | -1.45983 | 0.3769   | -3.87327 | 0.000107 | 0.000429 | 91.6126  | 94.70224 | 97.40239 | 26.78552 | 23.53022 | 48.23901 |
| 1007  | PARP8     | 1368.316 | -1.4613  | 0.133336 | -10.9595 | 5.98E-28 | 1.58E-26 | 1804.606 | 2345.112 | 1872.213 | 720.977  | 744.4105 | 722.5802 |
| 1687  | HOXB13    | 376.9117 | -1.46155 | 0.166928 | -8.75558 | 2.03E-18 | 3.20E-17 | 568.1065 | 520.0412 | 567.0211 | 198.6593 | 226.7457 | 180.8963 |
| 1576  | ARHGAP32  | 930.0747 | -1.4618  | 0.161655 | -9.04272 | 1.53E-19 | 2.58E-18 | 1218.61  | 1684.934 | 1187.613 | 497.7643 | 526.2212 | 465.3055 |
| 6259  | LOC119624 | 62.07226 | -1.46187 | 0.361315 | -4.04597 | 5.21E-05 | 0.000221 | 99.74389 | 73.90059 | 100.1853 | 33.4819  | 29.94755 | 35.17428 |
| 9987  | LOC103224 | 32.15369 | -1.46216 | 0.510526 | -2.86402 | 0.004183 | 0.011135 | 54.75072 | 33.39212 | 54.26705 | 11.16063 | 19.252   | 20.09959 |
| 2438  | YDJC      | 514.3221 | -1.4629  | 0.202855 | -7.21156 | 5.53E-13 | 6.03E-12 | 916.6681 | 542.4851 | 807.0484 | 279.0159 | 250.2759 | 290.4391 |
| 2267  | ACSGB1    | 258.3439 | -1.46442 | 0.195923 | -7.47446 | 7.75E-14 | 9.09E-13 | 380.0025 | 353.0806 | 409.09   | 122.767  | 128.3466 | 156.7768 |
| 3351  | SLC37A2   | 189.2578 | -1.46714 | 0.244825 | -5.99261 | 2.07E-09 | 1.64E-08 | 306.8209 | 253.4517 | 272.031  | 75.89232 | 136.9031 | 90.44815 |
| 13153 | RAD51AP2  | 18.82742 | -1.46868 | 0.673657 | -2.18016 | 0.029246 | 0.059112 | 27.10432 | 35.03436 | 19.48048 | 15.62489 | 10.69555 | 5.024897 |
| 5269  | LOC103224 | 86.54418 | -1.46932 | 0.323639 | -4.54001 | 5.63E-06 | 2.84E-05 | 102.4543 | 158.202  | 120.3615 | 49.10679 | 44.92132 | 44.2191  |
| 2060  | DENND5B   | 371.7137 | -1.46945 | 0.186691 | -7.87106 | 3.52E-15 | 4.54E-14 | 537.7497 | 597.2263 | 499.5351 | 247.7661 | 171.1289 | 176.8764 |
| 16237 | LOC103244 | 8.707385 | -1.46993 | 0.907914 | -1.61902 | 0.105444 | 0.172644 | 13.01007 | 16.42235 | 9.044508 | 4.464254 | 4.278221 | 5.024897 |
| 21528 | LOC103238 | 1.986099 | -1.47035 | 1.837128 | -0.80035 | 0.423508 | 0.522992 | 3.252518 | 2.737059 | 2.782925 | 0        | 2.139111 | 1.004979 |
| 15374 | LOC119614 | 10.90599 | -1.47192 | 0.834053 | -1.76478 | 0.077601 | 0.134188 | 20.59928 | 14.23271 | 13.91463 | 2.232127 | 6.417332 | 8.039836 |
| 1327  | LOC103244 | 655.3214 | -1.47238 | 0.150622 | -9.77536 | 1.44E-22 | 2.88E-21 | 903.658  | 1089.35  | 893.3191 | 386.158  | 335.8404 | 323.6034 |
| 15961 | LOC103224 | 10.47832 | -1.47349 | 0.880711 | -1.67307 | 0.094314 | 0.157091 | 23.8518  | 8.758589 | 13.2189  | 4.464254 | 8.556443 | 4.019918 |
| 15434 | LOC119614 | 10.47012 | -1.47433 | 0.840207 | -1.75472 | 0.079308 | 0.136607 | 18.43094 | 12.04306 | 15.30609 | 4.464254 | 8.556443 | 4.019918 |
| 1136  | CCNB1IP1  | 842.9857 | -1.47495 | 0.142158 | -10.3755 | 3.21E-25 | 7.51E-24 | 1369.852 | 1088.802 | 1263.448 | 401.7829 | 472.7435 | 461.2856 |
| 947   | WNT3      | 1010.415 | -1.47529 | 0.131449 | -11.2233 | 3.13E-29 | 8.80E-28 | 1492.906 | 1509.762 | 1465.21  | 524.5498 | 462.0479 | 608.0126 |
| 11302 | P2RY1     | 30.10953 | -1.47554 | 0.576939 | -2.55753 | 0.010542 | 0.024797 | 45.53526 | 42.69812 | 43.83108 | 31.24978 | 4.278221 | 13.06473 |
| 4667  | EDARADD   | 93.51874 | -1.47594 | 0.300934 | -4.90455 | 9.36E-07 | 5.33E-06 | 151.2421 | 134.6633 | 124.5359 | 60.26743 | 49.19955 | 41.20416 |
| 446   | EHD4      | 7546.5   | -1.47608 | 0.097395 | -15.1556 | 6.96E-52 | 4.15E-50 | 11109.52 | 11095.49 | 11112.92 | 3991.043 | 3604.401 | 4365.631 |
| 16626 | LOC119624 | 8.205322 | -1.47652 | 0.950406 | -1.55356 | 0.120288 | 0.192341 | 12.46799 | 15.87494 | 8.348776 | 2.232127 | 4.278221 | 6.029877 |
| 1062  | CRYGS     | 710.6594 | -1.47709 | 0.138244 | -10.6847 | 1.20E-26 | 3.01E-25 | 1026.712 | 1139.164 | 967.0666 | 401.7829 | 376.4835 | 352.7478 |
| 566   | SKA2      | 5334.333 | -1.47885 | 0.10576  | -13.9831 | 1.98E-44 | 9.29E-43 | 7347.439 | 8580.68  | 7618.259 | 2845.962 | 3026.842 | 2586.817 |
| 19190 | LOC119624 | 4.776639 | -1.47961 | 1.280334 | -1.15565 | 0.247826 | 0.34331  | 11.38381 | 4.926706 | 4.87012  | 4.464254 | 0        | 3.014938 |
| 22297 | LOC119624 | 1.573698 | -1.47992 | 2.192419 | -0.67502 | 0.499664 | 0.595756 | 2.710432 | 0.547412 | 4.174388 | 0        | 0        | 2.009959 |
| 6012  | TIGD4     | 79.06239 | -1.48022 | 0.355911 | -4.15895 | 3.20E-05 | 0.000141 | 126.8482 | 100.7238 | 118.2743 | 44.64254 | 57.75599 | 26.12947 |
| 4873  | LOC119624 | 193.3521 | -1.48077 | 0.311219 | -4.75796 | 1.96E-06 | 1.07E-05 | 391.3864 | 164.2235 | 300.556  | 84.82083 | 100.5382 | 118.5876 |
| 1755  | TMEM39B   | 339.1623 | -1.48111 | 0.172467 | -8.58778 | 8.87E-18 | 1.34E-16 | 509.5612 | 497.0499 | 496.7522 | 158.481  | 171.1289 | 202.0009 |
| 476   | TOP2A     | 22323.04 | -1.48137 | 0.099854 | -14.8354 | 8.64E-50 | 4.83E-48 | 31599.3  | 36595.03 | 30429.9  | 11562.42 | 11350.12 | 12401.45 |
| 601   | NAP1L1    | 35414.6  | -1.48266 | 0.109184 | -13.5794 | 5.31E-42 | 2.35E-40 | 47687.88 | 60456.71 | 48345.68 | 18196.3  | 19187.82 | 18613.22 |
| 1526  | TNIP2     | 851.7617 | -1.484   | 0.161921 | -9.16496 | 4.96E-20 | 8.64E-19 | 1415.93  | 1043.914 | 1312.149 | 404.015  | 414.9875 | 519.5744 |
| 11483 | LOC103244 | 20.8524  | -1.48509 | 0.589177 | -2.52061 | 0.011715 | 0.027122 | 27.10432 | 34.48694 | 30.61218 | 11.16063 | 10.69555 | 11.05477 |
| 2074  | LOC103214 | 339.7136 | -1.48663 | 0.189437 | -7.84759 | 4.24E-15 | 5.44E-14 | 498.7195 | 419.8649 | 583.0229 | 185.2665 | 177.5462 | 173.8614 |
| 26974 | PROK1     | 0.438213 | -1.48749 | 3.966977 | -0.37497 | 0.707683 | NA       | 0.542086 | 0        | 2.087194 | 0        | 0        | 0        |
| 27277 | LOC103214 | 0.438213 | -1.48749 | 3.966977 | -0.37497 | 0.707683 | NA       | 0.542086 | 0        | 2.087194 | 0        | 0        | 0        |
| 22828 | LOC119614 | 0.993596 | -1.48762 | 2.527782 | -0.58851 | 0.55619  | 0.647727 | 1.626259 | 0.547412 | 2.782925 | 0        | 0        | 1.004979 |
| 1077  | CHRNA5    | 543.3001 | -1.4881  | 0.140092 | -10.6223 | 2.35E-26 | 5.79E-25 | 788.7357 | 840.2771 | 773.6533 | 294.6408 | 278.0844 | 284.4092 |
| 934   | SYT12     | 1232.725 | -1.48815 | 0.131681 | -11.3012 | 1.29E-29 | 3.68E-28 | 2025.777 | 1567.24  | 1861.081 | 631.6919 | 650.2896 | 660.2715 |
| 9434  | ZNF229    | 36.19454 | -1.48821 | 0.496053 | -3.00009 | 0.002699 | 0.007606 | 57.46116 | 60.2153  | 40.35242 | 24.5534  | 23.53022 | 11.05477 |
| 20578 | RIPPLY2   | 2.788895 | -1.48865 | 1.581895 | -0.94106 | 0.346676 | 0.447847 | 4.336691 | 3.284471 | 4.87012  | 2.232127 | 0        | 2.009959 |
| 3582  | LOC103244 | 122.3999 | -1.48897 | 0.258023 | -5.7707  | 7.89E-09 | 5.86E-08 | 186.4777 | 172.9821 | 180.1944 | 64.73168 | 72.72976 | 57.28383 |
| 10908 | LOC119624 | 32.09851 | -1.48954 | 0.562185 | -2.64956 | 0.00806  | 0.019643 | 61.79785 | 24.08612 | 57.04997 | 17.85702 | 10.69555 |          |



|       |           |          |          |          |          |          |          |          |          |          |          |          |          |
|-------|-----------|----------|----------|----------|----------|----------|----------|----------|----------|----------|----------|----------|----------|
| 18186 | LOC103233 | 5.818382 | -1.49142 | 1.143033 | -1.30479 | 0.191963 | 0.280634 | 5.420864 | 9.306001 | 10.43597 | 4.464254 | 4.278221 | 1.004979 |
| 987   | MBOAT2    | 696.6544 | -1.49186 | 0.134958 | -11.0542 | 2.09E-28 | 5.63E-27 | 1100.435 | 1041.725 | 941.3245 | 363.8367 | 365.7879 | 366.8175 |
| 17476 | LOC103227 | 11.97803 | -1.49288 | 1.054826 | -1.41528 | 0.156985 | 0.23883  | 20.59928 | 10.40082 | 20.87194 | 17.85702 | 2.139111 | 0        |
| 595   | COL5A2    | 4665.991 | -1.49448 | 0.109505 | -13.6476 | 2.09E-42 | 9.32E-41 | 6867.692 | 7261.418 | 6546.136 | 2323.644 | 2235.371 | 2761.684 |
| 3016  | LOC103237 | 705.3453 | -1.49496 | 0.233813 | -6.39379 | 1.62E-10 | 1.43E-09 | 763.2576 | 1542.606 | 816.7886 | 372.7652 | 382.9008 | 353.7528 |
| 5770  | UNC5C     | 74.23067 | -1.49554 | 0.348791 | -4.28778 | 1.80E-05 | 8.31E-05 | 98.11763 | 129.1892 | 100.1853 | 31.24978 | 53.47777 | 33.16432 |
| 663   | RPL28     | 24833.44 | -1.49588 | 0.114529 | -13.0611 | 5.49E-39 | 2.20E-37 | 38593.3  | 30961.06 | 40448.43 | 13287.85 | 12177.96 | 13532.05 |
| 2135  | TFPI2     | 276.6678 | -1.49612 | 0.193686 | -7.72443 | 1.12E-14 | 1.40E-13 | 447.7633 | 381.546  | 400.7413 | 127.2312 | 136.9031 | 165.8216 |
| 15639 | LOC119623 | 10.1198  | -1.49678 | 0.866578 | -1.72723 | 0.084126 | 0.143097 | 10.29964 | 21.89647 | 12.52316 | 6.696381 | 4.278221 | 5.024897 |
| 9703  | SLA2      | 33.03359 | -1.49684 | 0.511187 | -2.92816 | 0.00341  | 0.009342 | 59.6295  | 35.03436 | 52.87558 | 17.85702 | 10.69555 | 22.10955 |
| 403   | EIF3I     | 6107.685 | -1.49694 | 0.095622 | -15.6549 | 3.08E-55 | 2.03E-53 | 9590.05  | 8241.832 | 9226.789 | 3274.53  | 3123.102 | 3189.805 |
| 4630  | ABHD15    | 118.6926 | -1.49744 | 0.303779 | -4.92936 | 8.25E-07 | 4.74E-06 | 190.8144 | 156.5598 | 182.2816 | 64.73168 | 36.36488 | 81.40334 |
| 647   | PIGW      | 1515.096 | -1.49772 | 0.113811 | -13.1598 | 1.50E-39 | 6.15E-38 | 2406.321 | 2162.824 | 2148.418 | 729.9055 | 815.0012 | 828.1031 |
| 12835 | LOC119623 | 18.05261 | -1.49945 | 0.671616 | -2.2326  | 0.025575 | 0.052974 | 31.44101 | 29.01283 | 18.78475 | 15.62489 | 6.417332 | 7.034856 |
| 22104 | TRNAV-UA  | 1.588999 | -1.5002  | 2.118297 | -0.70821 | 0.478814 | 0.575881 | 3.794605 | 1.642235 | 2.087194 | 0        | 0        | 2.009959 |
| 534   | BRCA1     | 7083.86  | -1.50047 | 0.105403 | -14.2355 | 5.52E-46 | 2.75E-44 | 10244.35 | 11575.02 | 9591.353 | 3662.92  | 3473.916 | 3955.599 |
| 19456 | LOC119623 | 8.831644 | -1.50083 | 1.352817 | -1.10941 | 0.267253 | 0.36518  | 20.0572  | 0        | 19.48048 | 0        | 6.417332 | 7.034856 |
| 5504  | LOC119623 | 67.67619 | -1.50318 | 0.340926 | -4.40909 | 1.04E-05 | 5.01E-05 | 110.0435 | 87.58589 | 102.2725 | 33.4819  | 38.50399 | 34.1693  |
| 3265  | EFCAB11   | 147.4462 | -1.50471 | 0.247546 | -6.07853 | 1.21E-09 | 9.88E-09 | 210.3295 | 245.7879 | 196.1962 | 89.28508 | 72.72976 | 70.34856 |
| 442   | NCR3LG1   | 4939.473 | -1.50495 | 0.099172 | -15.1752 | 5.16E-52 | 3.11E-50 | 7284.015 | 7748.614 | 6891.915 | 2424.09  | 2513.455 | 2774.748 |
| 805   | LOC119623 | 2039.028 | -1.50541 | 0.124853 | -12.0574 | 1.77E-33 | 5.85E-32 | 3286.67  | 2578.31  | 3185.754 | 1078.117 | 996.8256 | 1108.492 |
| 4745  | LOC119615 | 100.02   | -1.50636 | 0.310544 | -4.85072 | 1.23E-06 | 6.89E-06 | 133.8953 | 171.8873 | 135.6676 | 46.87467 | 70.59065 | 41.20416 |
| 1115  | ZNF593    | 605.5711 | -1.50663 | 0.14403  | -10.4606 | 1.31E-25 | 3.12E-24 | 983.3447 | 821.6651 | 880.7959 | 316.962  | 325.1448 | 305.5138 |
| 263   | RBBP4     | 5510.564 | -1.50871 | 0.083392 | -18.0917 | 3.70E-73 | 3.74E-71 | 8220.74  | 8086.915 | 8158.842 | 233.015  | 2776.566 | 2887.306 |
| 1563  | LOC119623 | 829.6656 | -1.51076 | 0.166775 | -9.05867 | 1.32E-19 | 2.25E-18 | 1496.158 | 1058.694 | 1126.389 | 412.9435 | 489.8563 | 393.952  |
| 6792  | LOC119623 | 110.587  | -1.51334 | 0.396109 | -3.82051 | 0.000133 | 0.000521 | 227.1342 | 72.80577 | 191.3261 | 62.49956 | 53.47777 | 56.27885 |
| 6786  | LOC119623 | 47.61266 | -1.51351 | 0.395922 | -3.82275 | 0.000132 | 0.000517 | 73.72375 | 69.5213  | 68.18167 | 22.32127 | 27.80844 | 24.11951 |
| 882   | GUF1      | 1779.388 | -1.51365 | 0.130425 | -11.6055 | 3.86E-31 | 1.16E-29 | 2510.944 | 2953.834 | 2444.104 | 796.8693 | 1028.912 | 941.6658 |
| 18254 | LOC119615 | 5.571504 | -1.51368 | 1.170904 | -1.29274 | 0.1961   | 0.285598 | 8.673382 | 6.02153  | 10.43597 | 0        | 4.278221 | 4.019918 |
| 5940  | SCNN1B    | 60.09834 | -1.51402 | 0.361275 | -4.19078 | 2.78E-05 | 0.000124 | 84.56547 | 84.84883 | 98.09812 | 24.5534  | 36.36488 | 32.15934 |
| 824   | EEF1B2    | 22227.33 | -1.51425 | 0.127185 | -11.9059 | 1.10E-32 | 3.56E-31 | 34133.55 | 26805.11 | 37838.74 | 11756.61 | 12148.01 | 10681.93 |
| 5279  | AOC3      | 70.28756 | -1.51559 | 0.334363 | -4.53276 | 5.82E-06 | 2.93E-05 | 108.4173 | 101.2712 | 102.2725 | 44.64254 | 29.94755 | 35.17428 |
| 7722  | LOC119615 | 47.86996 | -1.51604 | 0.43497  | -3.48539 | 0.000491 | 0.001692 | 84.56547 | 48.71965 | 79.31338 | 31.24978 | 19.252   | 24.11951 |
| 2338  | FBLL1     | 299.8264 | -1.51606 | 0.20609  | -7.35627 | 1.89E-13 | 2.15E-12 | 485.1673 | 350.3436 | 498.8394 | 158.481  | 143.3204 | 162.8007 |
| 2834  | MGAT5B    | 182.1966 | -1.51796 | 0.228684 | -6.63779 | 3.18E-11 | 2.99E-10 | 279.7166 | 255.0939 | 276.9011 | 109.3742 | 70.59065 | 101.5029 |
| 13395 | DNASE2    | 17.80124 | -1.51887 | 0.713644 | -2.12833 | 0.03331  | 0.066109 | 28.73058 | 19.70683 | 29.22072 | 11.16063 | 14.97377 | 3.014938 |
| 344   | ARNTL2    | 2727.28  | -1.51979 | 0.092007 | -16.5183 | 2.71E-61 | 2.09E-59 | 4169.186 | 3929.869 | 4033.85  | 1399.544 | 1418.23  | 1413.001 |
| 12125 | LOC119623 | 18.14586 | -1.52288 | 0.639923 | -2.37979 | 0.017322 | 0.037981 | 27.10432 | 30.10765 | 24.3506  | 6.696381 | 8.556443 | 12.05975 |
| 8801  | ZNF488    | 32.75911 | -1.52423 | 0.480311 | -3.17343 | 0.001507 | 0.004551 | 50.41403 | 43.79295 | 51.48412 | 13.39276 | 21.39111 | 16.07967 |
| 771   | EME1      | 1932.831 | -1.52511 | 0.123773 | -12.3218 | 6.91E-35 | 2.38E-33 | 2599.304 | 3300.893 | 2704.308 | 1037.939 | 979.7127 | 974.8301 |
| 7647  | LOC119623 | 44.51098 | -1.52524 | 0.434481 | -3.51047 | 0.000447 | 0.001555 | 59.08741 | 82.65918 | 57.7457  | 22.32127 | 17.11289 | 28.13943 |
| 10716 | MREG      | 29.04139 | -1.52554 | 0.567641 | -2.6875  | 0.007199 | 0.017859 | 52.04029 | 28.46541 | 47.30973 | 24.5534  | 12.83466 | 9.044815 |
| 16583 | CLEC2L    | 9.257384 | -1.52588 | 0.977977 | -1.56024 | 0.118704 | 0.1903   | 7.589209 | 14.23271 | 18.78475 | 2.232127 | 10.69555 | 2.009959 |
| 3672  | LOC119623 | 110.4352 | -1.52697 | 0.268955 | -5.67743 | 1.37E-08 | 9.90E-08 | 170.7572 | 151.6331 | 169.0627 | 60.26743 | 55.61688 | 55.27387 |
| 360   | MRPL45    | 2246.721 | -1.52733 | 0.093937 | -16.2591 | 1.92E-59 | 1.42E-57 | 3290.464 | 3391.216 | 3327.683 | 1165.17  | 1138.007 | 1167.786 |
| 425   | WFS1      | 5913.303 | -1.5276  | 0.099424 | -15.3645 | 2.83E-53 | 1.77E-51 | 8809.446 | 8854.386 | 8688.989 | 3091.496 | 2723.088 | 3312.412 |
| 679   | PHC2      | 8026.321 | -1.52847 | 0.118226 | -12.9283 | 3.12E-38 | 1.22E-36 | 12847.99 | 10682.74 | 12242.78 | 3957.561 | 3713.496 | 4713.354 |
| 562   | ATP2B1    | 39763.39 | -1.52906 | 0.108991 | -14.0292 | 1.03E-44 | 4.88E-43 | 54887.87 | 67895.49 | 54407.58 | 19740.93 | 19942.93 | 21705.55 |
| 5732  | FSTL4     | 83.16743 | -1.52972 | 0.355091 | -4.30797 | 1.65E-05 | 7.64E-05 | 101.3702 | 137.9478 | 128.0146 | 44.64254 | 59.8951  | 27.13445 |
| 1119  | LOC119623 | 787.3497 | -1.53007 | 0.146588 | -10.4379 | 1.66E-25 | 3.95E-24 | 1226.741 | 1002.858 | 1275.971 | 437.4969 | 402.1528 | 378.8773 |
| 16676 | TMEM61    | 8.518513 | -1.53047 | 0.99026  | -1.54552 | 0.12222  | 0.194844 | 11.9259  | 9.853413 | 15.30609 | 4.464254 | 8.556443 | 1.004979 |
| 10052 | LOC103223 | 47.70782 | -1.53108 | 0.537119 | -2.85053 | 0.004365 | 0.011543 | 73.72375 | 65.14201 | 70.9646  | 22.32127 | 47.06043 | 7.034856 |
| 1222  | CHN1      | 579.7362 | -1.5327  | 0.15193  | -10.0882 | 6.23E-24 | 1.36E-22 | 804.4562 | 961.8026 | 814.7014 | 325.8905 | 295.1973 | 276.3694 |
| 3802  | PCDHB13   | 113.726  | -1.53598 | 0.277289 | -5.53927 | 3.04E-08 | 2.12E-07 | 155.0367 | 189.4045 | 160.7139 | 69.19594 | 57.75599 | 50.24897 |
| 10329 | ST8SIA3   | 27.63197 | -1.53778 | 0.552802 | -2.78179 | 0.005406 | 0.013914 | 35.7777  | 41.05589 | 45.22254 | 11.16063 | 23.53022 | 9.044815 |
| 2297  | WASF1     | 282.4712 | -1.53809 | 0.207277 | -7.42048 | 1.17E-13 | 1.35E-12 | 396.2651 | 492.6706 | 371.5206 | 120.5349 | 171.1289 | 142.7071 |
| 861   | LOC103233 | 1118.634 | -1.5389  | 0.131311 | -11.7195 | 1.01E-31 | 3.13E-30 | 1609.454 | 1889.118 | 1493.735 | 584.8173 | 566.8643 | 567.8134 |
| 20819 | LOC103214 | 2.820169 | -1.53899 | 1.706514 | -0.90183 | 0.367146 | 0.46883  | 5.96295  | 0.547412 | 6.261582 | 0        | 2.139111 | 2.009959 |
| 16093 | TMEM163   | 8.834963 | -1.53953 | 0.934528 | -1.64739 | 0.099478 | 0.164333 | 12.46799 | 15.32753 | 11.1317  | 8.928508 | 2.139111 | 3.014938 |
| 6874  | LOC119623 | 49.67815 | -1.53972 | 0.40648  | -3.78792 | 0.000152 | 0.000588 | 66.13454 | 84.30142 | 69.57314 | 29.01765 | 29.94755 | 19.09461 |
| 773   | SMURF2    | 3763.708 | -1.5402  | 0.125293 | -12.2928 | 9.91E-35 | 3.41E-33 | 5211.076 | 6653.243 | 4939.693 | 1906.236 | 1944.452 | 1927.551 |
| 17114 | TRNAN-GL  | 7.795457 | -1.54181 | 1.042457 | -1.47901 | 0.139137 | 0.216136 | 6.505036 | 15.32753 | 13.2189  | 6.696381 | 0        | 5.024897 |
| 332   | RPL23A    | 31320.09 | -1.5433  | 0.09235  | -16.7115 | 1.08E-62 | 8.66E-61 | 48938.47 | 42339.02 | 48641.36 | 16223.1  | 15399.46 | 16379.16 |
| 14518 | LOC103233 | 17.31245 | -1.54332 | 0.803874 | -1.91985 | 0.054877 | 0.100461 | 20.0572  | 32.2973  | 23.65487 | 4.464254 | 21.39111 | 2.009959 |
| 10493 | NECAB2    | 26.95662 | -1.54347 | 0.562079 | -2.746   | 0.006033 | 0.015285 | 47.7036  | 35.03436 | 36.17803 | 13.39276 | 21.39111 | 8.039836 |
| 10625 | CREB3L3   | 27.00108 | -1.54355 | 0.569059 | -2.71246 | 0.006679 | 0.016711 | 35.7777  | 52.00412 | 31.30791 | 15.62489 | 19.252   | 8.039836 |
| 1111  | SYTL3     | 488.7469 | -1.54365 | 0.147312 | -10.4788 | 1.08E-25 | 2.59E-24 | 737.2375 | 726.4155 | 724.2564 | 264.0697 | 233.1631 | 270.3395 |
| 7123  | NFATC2    | 53.03768 | -1.54378 | 0.418501 | -3.68884 | 0.000225 | 0.000841 | 63.96619 | 96.34448 | 74.44326 | 29.01765 | 36.36488 | 18.08963 |
| 14603 | LOC119623 | 14.58332 | -1.54378 | 0.81024  | -1.90534 | 0.056736 | 0.103289 | 29.27266 | 14.78012 | 21.56767 | 0        | 12.83466 | 9.044815 |
| 1932  | LOC103223 | 280.9397 | -1.54566 | 0.190075 | -8.13185 | 4.23E-16 | 5.82E-15 | 423.9115 | 400.7054 | 425.7876 | 158.481  | 156.1551 | 120.5975 |
| 708   | PPP1R15A  | 5062.086 | -1.54619 | 0.121169 | -12.7606 | 2.72E-37 | 1.02E-35 | 6960.389 | 8800.74  |          |          |          |          |



|       |           |          |          |          |          |          |          |          |          |          |          |          |          |
|-------|-----------|----------|----------|----------|----------|----------|----------|----------|----------|----------|----------|----------|----------|
| 966   | HIST2H2AE | 1877.638 | -1.54897 | 0.139049 | -11.1397 | 8.04E-29 | 2.21E-27 | 2918.051 | 2319.384 | 3163.491 | 979.9037 | 859.9225 | 1025.079 |
| 13970 | LOC119624 | 14.99184 | -1.54918 | 0.767854 | -2.01755 | 0.043638 | 0.083043 | 29.27266 | 15.87494 | 21.56767 | 2.232127 | 14.97377 | 6.029877 |
| 2232  | PHF21B    | 213.1406 | -1.55102 | 0.2056   | -7.54388 | 4.56E-14 | 5.43E-13 | 337.1777 | 287.9386 | 327.6895 | 107.1421 | 113.3729 | 105.5228 |
| 2110  | BLOC1S4   | 428.7761 | -1.55163 | 0.19932  | -7.78463 | 6.99E-15 | 8.81E-14 | 731.8166 | 512.9249 | 677.6424 | 229.9091 | 171.1289 | 249.2349 |
| 3708  | DTNA      | 151.2599 | -1.55199 | 0.275489 | -5.63359 | 1.76E-08 | 1.27E-07 | 192.4407 | 257.831  | 221.9383 | 84.82083 | 96.25998 | 54.26889 |
| 5039  | LOC103237 | 132.293  | -1.5538  | 0.332943 | -4.66686 | 3.06E-06 | 1.61E-05 | 245.5651 | 111.672  | 234.4615 | 71.42806 | 66.31243 | 64.31869 |
| 309   | UBE2S     | 7210.798 | -1.55413 | 0.089956 | -17.2766 | 7.06E-67 | 6.07E-65 | 10949.06 | 10035.15 | 11293.81 | 3658.456 | 3578.732 | 3749.578 |
| 10172 | LOC119624 | 26.97118 | -1.55478 | 0.551122 | -2.82112 | 0.004786 | 0.012507 | 49.87195 | 31.74989 | 40.35242 | 8.928508 | 12.83466 | 18.08963 |
| 26906 | LOC119624 | 0.453514 | -1.55519 | 3.96424  | -0.3923  | 0.694834 | NA       | 1.626259 | 1.094824 | 0        | 0        | 0        | 0        |
| 12816 | LOC119624 | 19.03789 | -1.55553 | 0.695893 | -2.2353  | 0.025398 | 0.052684 | 26.56223 | 27.918   | 29.22072 | 20.08914 | 6.417332 | 4.019918 |
| 26670 | LOC119618 | 0.454401 | -1.55784 | 3.964135 | -0.39298 | 0.694332 | NA       | 1.084173 | 1.642235 | 0        | 0        | 0        | 0        |
| 551   | SLC39A8   | 1477.493 | -1.55816 | 0.110272 | -14.1302 | 2.47E-45 | 1.19E-43 | 2181.898 | 2313.91  | 2128.242 | 723.2091 | 718.7412 | 798.9587 |
| 21137 | TRNAP-UG  | 2.077334 | -1.55859 | 1.812422 | -0.85995 | 0.389819 | 0.490304 | 3.252518 | 3.284471 | 2.782925 | 0        | 2.139111 | 1.004979 |
| 18775 | LOC119624 | 4.93608  | -1.55863 | 1.275279 | -1.22218 | 0.221638 | 0.313835 | 5.420864 | 4.379295 | 12.52316 | 0        | 4.278221 | 3.014938 |
| 11136 | LOC103246 | 20.82736 | -1.55879 | 0.600736 | -2.5948  | 0.009464 | 0.022596 | 37.40396 | 27.918   | 27.82925 | 8.928508 | 12.83466 | 10.04979 |
| 10852 | BARX1     | 23.03855 | -1.55898 | 0.586063 | -2.66009 | 0.007812 | 0.019138 | 37.40396 | 35.58177 | 29.91645 | 17.85702 | 6.417332 | 11.05477 |
| 636   | SEPSECS   | 1122.766 | -1.5595  | 0.117726 | -13.2468 | 4.71E-40 | 1.97E-38 | 1801.353 | 1603.917 | 1627.316 | 549.1032 | 569.0034 | 585.903  |
| 15206 | LOC103218 | 9.690332 | -1.56031 | 0.868992 | -1.79554 | 0.072568 | 0.126872 | 12.46799 | 12.59047 | 18.08902 | 6.696381 | 4.278221 | 4.019918 |
| 22745 | LOC119624 | 1.301236 | -1.56044 | 2.594519 | -0.60144 | 0.547548 | 0.639989 | 0        | 2.189647 | 3.478657 | 0        | 2.139111 | 0        |
| 29071 | NPB       | 0.455289 | -1.56048 | 3.964031 | -0.39366 | 0.693832 | NA       | 0.542086 | 2.189647 | 0        | 0        | 0        | 0        |
| 5003  | ADA       | 82.85199 | -1.56054 | 0.332989 | -4.68648 | 2.78E-06 | 1.48E-05 | 138.232  | 95.79707 | 138.4505 | 33.4819  | 44.92132 | 46.22906 |
| 1975  | FAM72A    | 410.4861 | -1.56116 | 0.194231 | -8.03762 | 9.16E-16 | 1.23E-14 | 551.8439 | 759.8076 | 525.2772 | 227.677  | 205.3546 | 192.9561 |
| 6882  | LOC119624 | 50.56438 | -1.56193 | 0.412677 | -3.78486 | 0.000154 | 0.000594 | 79.14461 | 71.16354 | 75.83472 | 15.62489 | 38.50399 | 23.11453 |
| 16500 | TRPC3     | 10.68232 | -1.56283 | 0.992054 | -1.57535 | 0.115176 | 0.185573 | 15.17842 | 12.04306 | 19.48048 | 6.696381 | 10.69555 | 0        |
| 10441 | LOC103220 | 22.99737 | -1.56481 | 0.567591 | -2.75694 | 0.005835 | 0.014856 | 34.15144 | 38.86624 | 29.91645 | 11.16063 | 12.83466 | 11.05477 |
| 507   | BIRC5     | 5890.816 | -1.56524 | 0.107907 | -14.5055 | 1.12E-47 | 5.86E-46 | 9513.074 | 7679.64  | 9228.877 | 2953.104 | 2889.939 | 3080.262 |
| 27637 | TRNAP-AG  | 0.463821 | -1.56526 | 3.963843 | -0.39488 | 0.692928 | NA       | 0        | 0        | 2.782925 | 0        | 0        | 0        |
| 27891 | LOC119624 | 0.463821 | -1.56526 | 3.963843 | -0.39488 | 0.692928 | NA       | 0        | 0        | 2.782925 | 0        | 0        | 0        |
| 419   | CDCA7L    | 7568.114 | -1.56631 | 0.101346 | -15.455  | 6.98E-54 | 4.43E-52 | 10945.27 | 12467.85 | 10539.63 | 3756.67  | 3647.184 | 4052.077 |
| 13243 | LRRC3     | 17.05075 | -1.56668 | 0.725811 | -2.15852 | 0.030888 | 0.062006 | 35.23561 | 15.32753 | 25.04633 | 6.696381 | 14.97377 | 5.024897 |
| 9486  | LOC119618 | 51.6335  | -1.56776 | 0.524723 | -2.98779 | 0.00281  | 0.007875 | 113.8381 | 30.65506 | 86.96642 | 17.85702 | 36.36488 | 24.11951 |
| 15150 | LOC119624 | 9.983976 | -1.56834 | 0.868456 | -1.8059  | 0.070934 | 0.124478 | 18.43094 | 14.78012 | 11.82743 | 6.696381 | 2.139111 | 6.029877 |
| 767   | STK32A    | 965.3444 | -1.56902 | 0.126985 | -12.356  | 4.52E-35 | 1.57E-33 | 1518.384 | 1390.973 | 1429.728 | 477.6752 | 440.6568 | 534.6491 |
| 6341  | LOC103224 | 56.26496 | -1.57119 | 0.391883 | -4.00934 | 6.09E-05 | 0.000255 | 74.44801 | 75.13899 | 20.08914 | 30.14938 | 30.14938 | 30.14938 |
| 978   | LOC103218 | 804.9832 | -1.57337 | 0.141174 | -11.1004 | 1.25E-28 | 3.40E-27 | 1354.674 | 1080.591 | 1181.352 | 421.872  | 374.3444 | 417.0665 |
| 6032  | LOC103218 | 68.31109 | -1.57408 | 0.379345 | -4.14947 | 3.33E-05 | 0.000147 | 111.1277 | 69.5213  | 125.9274 | 40.17829 | 29.94755 | 33.16432 |
| 503   | DPYSL3    | 19963.86 | -1.5749  | 0.107703 | -14.6227 | 2.01E-48 | 1.06E-46 | 28479.59 | 33576.6  | 27632.36 | 9950.822 | 9288.019 | 10855.79 |
| 22999 | LOC119624 | 1.038054 | -1.57495 | 2.794368 | -0.56362 | 0.573016 | 0.66236  | 0        | 3.831883 | 1.391463 | 0        | 0        | 1.004979 |
| 391   | RASA1     | 8471.625 | -1.57574 | 0.099524 | -15.8328 | 1.85E-56 | 1.26E-54 | 12363.91 | 13960.1  | 11743.25 | 4140.596 | 4147.736 | 4474.169 |
| 3722  | TSPAN19   | 116.8857 | -1.57598 | 0.28043  | -5.61988 | 1.91E-08 | 1.36E-07 | 176.7202 | 149.9908 | 200.3706 | 46.87467 | 62.03421 | 65.32367 |
| 4193  | CAVIN4    | 87.26314 | -1.57679 | 0.301866 | -5.22346 | 1.76E-07 | 1.11E-06 | 135.5216 | 120.4306 | 135.6676 | 49.10679 | 40.6431  | 42.20914 |
| 1820  | LOC103218 | 378.362  | -1.57696 | 0.187876 | -8.39364 | 4.71E-17 | 6.88E-16 | 538.2918 | 662.3683 | 496.7522 | 178.5702 | 220.3284 | 173.8614 |
| 6006  | LOC119624 | 74.51087 | -1.58113 | 0.379973 | -4.16116 | 3.17E-05 | 0.00014  | 138.7741 | 72.80577 | 123.8402 | 44.64254 | 27.80844 | 39.1942  |
| 527   | SPTBN5    | 1767.119 | -1.5818  | 0.110762 | -14.281  | 2.87E-46 | 1.45E-44 | 2787.408 | 2441.457 | 2724.484 | 852.6725 | 862.0616 | 934.6309 |
| 1422  | HOXD13    | 337.3551 | -1.58222 | 0.167301 | -9.45733 | 3.16E-21 | 5.91E-20 | 485.1673 | 521.6835 | 510.6668 | 176.338  | 160.4333 | 169.8415 |
| 14575 | TEX19     | 11.68274 | -1.58272 | 0.828471 | -1.91041 | 0.05608  | 0.102291 | 19.51511 | 17.51718 | 14.61036 | 11.16063 | 4.278221 | 3.014938 |
| 692   | GNB4      | 812.5528 | -1.58462 | 0.123116 | -12.871  | 6.55E-38 | 2.52E-36 | 1209.937 | 1259.595 | 1189.005 | 406.2471 | 391.4573 | 419.0764 |
| 369   | GRPEL1    | 2095.983 | -1.58482 | 0.098151 | -16.1467 | 1.20E-58 | 8.63E-57 | 3186.384 | 3227.54  | 3018.778 | 1064.725 | 1018.217 | 1060.253 |
| 498   | MOCOS     | 2656.775 | -1.58535 | 0.108107 | -14.6646 | 1.09E-48 | 5.80E-47 | 4407.704 | 3665.47  | 3884.964 | 1303.562 | 1326.249 | 1352.702 |
| 3629  | UNORF3    | 108.7188 | -1.58784 | 0.277968 | -5.71233 | 1.11E-08 | 8.16E-08 | 156.663  | 170.2451 | 160.0182 | 60.26743 | 59.8951  | 45.22408 |
| 18903 | DPEP2NB   | 4.729881 | -1.58919 | 1.319958 | -1.20397 | 0.228602 | 0.321504 | 8.673382 | 6.02153  | 6.261582 | 0        | 6.417332 | 1.004979 |
| 334   | TBC1D1    | 23202.61 | -1.58931 | 0.095418 | -16.6564 | 2.72E-62 | 2.16E-60 | 34365.57 | 37353.19 | 32780.77 | 11504.38 | 10798.23 | 12413.51 |
| 9219  | OCA2      | 28.15711 | -1.59031 | 0.521419 | -3.04997 | 0.002289 | 0.0066   | 45.53526 | 36.12918 | 44.52681 | 17.85702 | 12.83466 | 12.05975 |
| 17785 | LOC119618 | 6.081234 | -1.59171 | 1.156799 | -1.37596 | 0.168835 | 0.252436 | 13.01007 | 5.474118 | 8.348776 | 2.232127 | 6.417332 | 1.004979 |
| 18060 | LOC103224 | 6.806537 | -1.59325 | 1.196202 | -1.33192 | 0.182886 | 0.269215 | 7.589209 | 13.13788 | 9.044508 | 8.928508 | 2.139111 | 0        |
| 8290  | LOC119624 | 33.24131 | -1.5939  | 0.480639 | -3.31621 | 0.000912 | 0.002926 | 41.74065 | 52.00412 | 55.65851 | 17.85702 | 17.11289 | 15.07469 |
| 3078  | LOC119624 | 217.096  | -1.59505 | 0.253031 | -6.30376 | 2.91E-10 | 2.51E-09 | 383.7971 | 258.3784 | 334.6468 | 84.82083 | 145.4595 | 95.47305 |
| 1339  | LOC103235 | 1913.367 | -1.59584 | 0.163718 | -9.74749 | 1.89E-22 | 3.75E-21 | 3288.296 | 2113.01  | 3228.889 | 906.2436 | 917.6785 | 1026.084 |
| 2721  | LOC103246 | 170.0817 | -1.59666 | 0.234359 | -6.8129  | 9.57E-12 | 9.34E-11 | 275.3799 | 225.5337 | 266.4651 | 71.42806 | 96.25998 | 85.42325 |
| 415   | TRIB2     | 1836.216 | -1.59856 | 0.103083 | -15.5075 | 3.09E-54 | 1.98E-52 | 2787.95  | 2859.679 | 2635.43  | 944.1897 | 868.4789 | 921.5662 |
| 1026  | BAIAP2L1  | 642.6582 | -1.59902 | 0.146925 | -10.8832 | 1.39E-27 | 3.59E-26 | 898.2371 | 1086.065 | 912.1038 | 319.1942 | 335.8404 | 304.5088 |
| 682   | FBLN1     | 1481.776 | -1.59905 | 0.123939 | -12.9018 | 4.40E-38 | 1.71E-36 | 2318.503 | 2144.212 | 2232.602 | 694.1915 | 660.9852 | 840.1628 |
| 1654  | ADAM19    | 310.0158 | -1.60023 | 0.181022 | -8.84    | 9.57E-19 | 1.54E-17 | 454.2684 | 487.7439 | 453.6169 | 145.0883 | 179.6853 | 139.6921 |
| 749   | RBM11     | 828.1107 | -1.60257 | 0.128542 | -12.4673 | 1.13E-35 | 3.99E-34 | 1271.735 | 1292.987 | 1172.307 | 381.6937 | 444.935  | 405.0067 |
| 18248 | LOC103224 | 4.770911 | -1.60282 | 1.239523 | -1.2931  | 0.195977 | 0.285498 | 8.131296 | 6.02153  | 6.957314 | 2.232127 | 4.278221 | 1.004979 |
| 6652  | LOC119620 | 48.54002 | -1.60395 | 0.413688 | -3.8772  | 0.000106 | 0.000422 | 84.56547 | 60.2153  | 75.83472 | 20.08914 | 21.39111 | 29.1444  |
| 9931  | CUNH2orf  | 27.85354 | -1.60447 | 0.557418 | -2.8784  | 0.003997 | 0.0107   | 41.19856 | 50.9093  | 32.00364 | 17.85702 | 17.11289 | 8.039836 |
| 15390 | LOC119618 | 9.09371  | -1.60456 | 0.910797 | -1.76171 | 0.078118 | 0.134943 | 16.80468 | 9.853413 | 13.91463 | 6.696381 | 4.278221 | 3.014938 |
| 14392 | LOC119618 | 14.0681  | -1.60521 | 0.825327 | -1.94494 | 0.051782 | 0.095652 | 16.80468 | 25.72836 | 20.87194 | 0        | 14.97377 | 6.029877 |
| 8943  | LOC119618 | 30.16378 | -1.60557 | 0.51236  | -3.13368 | 0.001726 | 0.005132 | 45.53526 | 41.6033  | 48.00546 | 13.39276 | 21.39111 | 11.05477 |
| 22118 | LOC119624 | 1.331151 | -1.60627 | 2.275284 | -0.70596 | 0.480211 | 0.577195 | 1.626259 | 2.737059 | 1.391463 | 2.232127 | 0        | 0        |
| 850   | NHSL1     | 1901.236 | -1.60651 | 0.136352 | -11.7    |          |          |          |          |          |          |          |          |



|       |           |          |          |          |          |          |          |          |          |          |          |          |          |
|-------|-----------|----------|----------|----------|----------|----------|----------|----------|----------|----------|----------|----------|----------|
| 6990  | LOC119621 | 60.14299 | -1.60705 | 0.429929 | -3.73795 | 0.000186 | 0.000706 | 99.20181 | 95.24966 | 73.74753 | 37.94616 | 40.6431  | 14.06971 |
| 3937  | LOC103234 | 105.7754 | -1.60786 | 0.296915 | -5.41523 | 6.12E-08 | 4.13E-07 | 162.6259 | 183.9304 | 129.406  | 53.57105 | 59.8951  | 45.22408 |
| 405   | TNFAIP3   | 4068.578 | -1.60898 | 0.102918 | -15.6337 | 4.29E-55 | 2.82E-53 | 6003.064 | 6455.628 | 5935.284 | 2011.146 | 1822.522 | 2183.82  |
| 4552  | LOC103241 | 186.6351 | -1.60967 | 0.323823 | -4.97085 | 6.67E-07 | 3.89E-06 | 344.2248 | 145.0641 | 354.823  | 91.51721 | 87.70354 | 96.47803 |
| 1035  | SLC18A3   | 517.5129 | -1.60997 | 0.148691 | -10.8276 | 2.55E-27 | 6.54E-26 | 763.7997 | 830.9711 | 740.9539 | 279.0159 | 248.1368 | 242.2001 |
| 495   | SLC7A1    | 6259.77  | -1.61089 | 0.109634 | -14.6934 | 7.11E-49 | 3.82E-47 | 9347.195 | 9843.559 | 9118.255 | 2944.175 | 2782.983 | 3522.453 |
| 526   | APBB2     | 11263.81 | -1.61173 | 0.112817 | -14.2862 | 2.67E-46 | 1.35E-44 | 19492.24 | 15405.58 | 5339.248 | 5354.194 | 5961.538 |          |
| 615   | VLDLR     | 1009.143 | -1.6125  | 0.120049 | -13.432  | 3.93E-41 | 1.70E-39 | 1569.882 | 1578.736 | 1414.422 | 484.3716 | 506.9692 | 500.4798 |
| 1233  | TSPAN13   | 381.1104 | -1.61326 | 0.160418 | -10.0566 | 8.59E-24 | 1.85E-22 | 579.4903 | 575.3298 | 567.0211 | 178.5702 | 205.3546 | 180.8963 |
| 1384  | LOC103241 | 611.866  | -1.61343 | 0.168056 | -9.60055 | 7.95E-22 | 1.53E-20 | 1090.136 | 762.5447 | 914.8868 | 287.9444 | 310.171  | 305.5138 |
| 7876  | LOC103241 | 37.30644 | -1.61446 | 0.468373 | -3.44695 | 0.000567 | 0.001914 | 59.6295  | 60.2153  | 47.30973 | 20.08914 | 23.53022 | 13.06473 |
| 549   | PTPN13    | 13795.01 | -1.61483 | 0.114263 | -14.1326 | 2.39E-45 | 1.16E-43 | 19369.29 | 24265.67 | 18765.96 | 6716.47  | 6558.513 | 7094.15  |
| 10628 | ELOVL3    | 29.3442  | -1.61496 | 0.59556  | -2.71167 | 0.006695 | 0.016746 | 39.5723  | 51.45671 | 40.35242 | 6.696381 | 29.94755 | 8.039836 |
| 973   | GADD45A   | 1400.732 | -1.61591 | 0.145227 | -11.1268 | 9.29E-29 | 2.54E-27 | 1917.359 | 2552.581 | 1866.647 | 656.2453 | 725.1585 | 686.401  |
| 518   | DCLK1     | 1960.282 | -1.61626 | 0.112338 | -14.3874 | 6.21E-47 | 3.19E-45 | 2889.32  | 3223.708 | 2760.662 | 899.5472 | 975.4345 | 1013.019 |
| 5218  | LOC103211 | 221.9097 | -1.6189  | 0.354157 | -4.57112 | 4.85E-06 | 2.47E-05 | 478.6623 | 153.8227 | 374.9992 | 89.28508 | 91.98176 | 142.7071 |
| 7719  | RASEF     | 41.52864 | -1.61918 | 0.464375 | -3.48678 | 0.000489 | 0.001684 | 52.04029 | 72.80577 | 61.22436 | 20.08914 | 29.94755 | 13.06473 |
| 20816 | LOC119621 | 2.748212 | -1.62129 | 1.796654 | -0.90239 | 0.366848 | 0.468517 | 6.505036 | 2.737059 | 2.782925 | 4.464254 | 0        | 0        |
| 715   | RAB28     | 766.4065 | -1.62211 | 0.127829 | -12.6897 | 6.74E-37 | 2.51E-35 | 1126.455 | 1219.634 | 1124.302 | 361.6046 | 393.5964 | 372.8474 |
| 5377  | LOC103211 | 70.44656 | -1.62237 | 0.362384 | -4.47692 | 7.57E-06 | 3.74E-05 | 123.0536 | 87.03848 | 107.1426 | 31.24978 | 47.06043 | 27.13445 |
| 8904  | FRMD5     | 32.36618 | -1.62321 | 0.516392 | -3.14336 | 0.00167  | 0.004986 | 47.16151 | 57.47824 | 40.35242 | 15.62489 | 23.53022 | 10.04979 |
| 27297 | LOC119621 | 0.477346 | -1.6238  | 3.961591 | -0.40988 | 0.68189  | NA       | 2.168345 | 0        | 0.695731 | 0        | 0        | 0        |
| 27656 | TRNAM-CA  | 0.477346 | -1.6238  | 3.961591 | -0.40988 | 0.68189  | NA       | 2.168345 | 0        | 0.695731 | 0        | 0        | 0        |
| 2845  | SPOCD1    | 174.8971 | -1.62466 | 0.245408 | -6.62024 | 3.59E-11 | 3.35E-10 | 292.7266 | 260.568  | 243.506  | 62.49956 | 85.56443 | 104.5179 |
| 676   | CEP170    | 15018.89 | -1.62506 | 0.125366 | -12.9625 | 2.00E-38 | 7.85E-37 | 20499.54 | 27330.63 | 20224.91 | 7294.591 | 7016.283 | 7747.387 |
| 8578  | LOC103241 | 32.65582 | -1.62526 | 0.502504 | -3.23432 | 0.001219 | 0.003779 | 42.82482 | 47.07742 | 57.04997 | 13.39276 | 23.53022 | 12.05975 |
| 1565  | LOC103231 | 522.5759 | -1.62544 | 0.179506 | -9.05508 | 1.36E-19 | 2.32E-18 | 696.0389 | 953.5914 | 715.2118 | 245.534  | 290.9191 | 234.1602 |
| 19495 | TRNAC-GC  | 3.540831 | -1.62577 | 1.476059 | -1.10143 | 0.270711 | 0.369172 | 4.336691 | 6.568942 | 4.87012  | 4.464254 | 0        | 1.004979 |
| 1553  | LOC103221 | 287.1509 | -1.62641 | 0.17923  | -9.0744  | 1.14E-19 | 1.96E-18 | 434.2112 | 441.2139 | 425.0919 | 131.6955 | 154.016  | 136.6772 |
| 27522 | LOC119621 | 0.478234 | -1.62683 | 3.587241 | -0.4535  | 0.650185 | NA       | 1.626259 | 0.547412 | 0.695731 | 0        | 0        | 0        |
| 28239 | LOC119611 | 0.478234 | -1.62683 | 3.587241 | -0.4535  | 0.650185 | NA       | 1.626259 | 0.547412 | 0.695731 | 0        | 0        | 0        |
| 5318  | PTPRB     | 102.3473 | -1.62694 | 0.360729 | -4.51014 | 6.48E-06 | 3.24E-05 | 143.1108 | 166.4132 | 149.5822 | 60.26743 | 70.59065 | 24.11951 |
| 6534  | LOC119621 | 47.01023 | -1.62769 | 0.414681 | -3.92516 | 8.67E-05 | 0.000353 | 76.43418 | 62.40495 | 75.83472 | 17.85702 | 21.39111 | 28.13943 |
| 1063  | LOC103241 | 1765.743 | -1.6278  | 0.152393 | -10.6816 | 1.24E-26 | 3.11E-25 | 2447.52  | 3292.682 | 2259.04  | 915.1721 | 894.1483 | 785.8939 |
| 6901  | TRNAI-AAI | 40.55713 | -1.62792 | 0.431107 | -3.77615 | 0.000159 | 0.000614 | 60.17159 | 59.12048 | 64.70302 | 17.85702 | 21.39111 | 20.09959 |
| 652   | LOC119621 | 1903.634 | -1.62894 | 0.124346 | -13.1001 | 3.29E-39 | 1.34E-37 | 2748.92  | 3177.178 | 2714.048 | 906.2436 | 834.2532 | 1041.159 |
| 28888 | LOC119621 | 0.479121 | -1.62937 | 3.559489 | -0.45776 | 0.647128 | NA       | 1.084173 | 1.094824 | 0.695731 | 0        | 0        | 0        |
| 29253 | LOC103241 | 0.479121 | -1.62937 | 3.559489 | -0.45776 | 0.647128 | NA       | 1.084173 | 1.094824 | 0.695731 | 0        | 0        | 0        |
| 4415  | EBF4      | 88.18758 | -1.63123 | 0.321697 | -5.07071 | 3.96E-07 | 2.39E-06 | 136.6058 | 113.8617 | 149.5822 | 31.24978 | 55.61688 | 42.20914 |
| 471   | CKS1B     | 1842.717 | -1.6329  | 0.109719 | -14.8825 | 4.28E-50 | 2.42E-48 | 2710.974 | 2621.008 | 3025.736 | 935.2612 | 892.0091 | 871.3172 |
| 364   | ODC1      | 30246.71 | -1.63337 | 0.100706 | -16.2192 | 3.69E-59 | 2.69E-57 | 49509.29 | 40528.18 | 47210.94 | 14502.13 | 14255.03 | 15474.67 |
| 453   | TSEN15    | 1621.508 | -1.63523 | 0.108609 | -15.0561 | 3.15E-51 | 1.85E-49 | 2601.472 | 2329.237 | 2429.494 | 752.2268 | 825.6967 | 790.9188 |
| 5463  | LOC119621 | 60.69282 | -1.63532 | 0.368925 | -4.43265 | 9.31E-06 | 4.53E-05 | 84.02339 | 100.7238 | 90.44508 | 22.32127 | 38.50399 | 28.13943 |
| 4733  | FOXA3     | 92.64496 | -1.63538 | 0.336436 | -4.86089 | 1.17E-06 | 6.56E-06 | 148.5317 | 128.6418 | 139.842  | 69.19594 | 38.50399 | 31.15436 |
| 961   | SLC47A2   | 1418.37  | -1.63736 | 0.146811 | -11.1528 | 6.94E-29 | 1.92E-27 | 2381.385 | 1800.985 | 2265.997 | 647.3168 | 624.6203 | 789.9139 |
| 14304 | LOC119611 | 15.21777 | -1.6375  | 0.835266 | -1.96045 | 0.049943 | 0.092822 | 27.10432 | 16.96977 | 24.3506  | 17.85702 | 0        | 5.024897 |
| 1051  | TMEFF1    | 513.6708 | -1.63907 | 0.152363 | -10.7576 | 5.46E-27 | 1.38E-25 | 747.5371 | 844.109  | 737.4753 | 252.2303 | 269.5279 | 231.1453 |
| 1214  | CACNB4    | 598.733  | -1.64096 | 0.162249 | -10.1139 | 4.80E-24 | 1.05E-22 | 852.1598 | 1020.923 | 845.3136 | 252.2303 | 344.3968 | 277.3743 |
| 751   | CDC42EP3  | 21057.41 | -1.64115 | 0.13169  | -12.4622 | 1.20E-35 | 4.25E-34 | 27864.87 | 39350.15 | 28458.89 | 10205.28 | 9901.943 | 10563.34 |
| 2791  | FAM71A    | 212.3161 | -1.6421  | 0.244699 | -6.71069 | 1.94E-11 | 8.85E-10 | 296.5212 | 355.2703 | 306.8175 | 131.6955 | 111.2338 | 72.35852 |
| 3631  | LOC119621 | 99.85008 | -1.6423  | 0.287588 | -5.71061 | 1.13E-08 | 8.24E-08 | 152.3263 | 142.3271 | 157.2353 | 55.80317 | 49.19955 | 42.20914 |
| 8752  | LOC119621 | 29.4424  | -1.64374 | 0.515614 | -3.18792 | 0.001433 | 0.004353 | 50.41403 | 42.69812 | 39.65669 | 17.85702 | 14.97377 | 11.05477 |
| 336   | VGF       | 30448.15 | -1.64389 | 0.098895 | -16.6226 | 4.78E-62 | 3.79E-60 | 45791.12 | 44597.64 | 48023.55 | 15055.7  | 13151.25 | 16069.62 |
| 278   | AK2       | 10018.98 | -1.64547 | 0.092048 | -17.8761 | 1.81E-71 | 1.73E-69 | 14477.5  | 16543.33 | 14531.05 | 4921.84  | 4817.277 | 4822.896 |
| 3885  | LOC119621 | 97.94637 | -1.64652 | 0.30163  | -5.45874 | 4.80E-08 | 3.28E-07 | 143.6529 | 141.2322 | 163.4969 | 44.64254 | 36.36488 | 58.28881 |
| 8621  | LOC103211 | 33.37651 | -1.64715 | 0.511006 | -3.22335 | 0.001267 | 0.003907 | 44.99317 | 54.74118 | 50.09266 | 17.85702 | 23.53022 | 9.044815 |
| 1290  | NGEF      | 396.3966 | -1.64837 | 0.166784 | -9.88327 | 4.92E-23 | 1.01E-21 | 631.5306 | 563.8342 | 612.2436 | 189.7308 | 168.9897 | 212.0507 |
| 7231  | LOC103241 | 44.37279 | -1.64841 | 0.450687 | -3.65754 | 0.000255 | 0.000936 | 71.01331 | 53.64636 | 78.61764 | 11.16063 | 25.66933 | 26.12947 |
| 19259 | LOC119621 | 3.535303 | -1.65063 | 1.444402 | -1.14278 | 0.25313  | 0.349382 | 8.673382 | 4.379295 | 2.782925 | 2.232127 | 2.139111 | 1.004979 |
| 6025  | LOC103241 | 49.26552 | -1.6508  | 0.397419 | -4.15381 | 3.27E-05 | 0.000144 | 75.89209 | 70.61612 | 76.53045 | 26.78552 | 25.66933 | 20.09959 |
| 408   | SNRNP40   | 2104.88  | -1.65249 | 0.106018 | -15.5869 | 8.93E-55 | 5.82E-53 | 3291.548 | 3058.937 | 3240.021 | 982.1359 | 956.1825 | 1100.453 |
| 837   | TAF12     | 1520.757 | -1.65256 | 0.139591 | -11.8386 | 2.47E-32 | 7.83E-31 | 2057.218 | 2680.128 | 2179.726 | 718.7449 | 821.4185 | 667.3064 |
| 2756  | LOC119621 | 160.5608 | -1.65341 | 0.244475 | -6.76312 | 1.35E-11 | 1.30E-10 | 257.491  | 211.8484 | 263.6822 | 62.49956 | 83.42532 | 84.41828 |
| 9496  | CHGA      | 35.52538 | -1.65398 | 0.554183 | -2.98453 | 0.00284  | 0.007951 | 46.07734 | 65.14201 | 48.00546 | 20.08914 | 27.80844 | 6.029877 |
| 17875 | LOC119621 | 5.201254 | -1.65933 | 1.215693 | -1.36493 | 0.172277 | 0.256222 | 5.96295  | 8.211177 | 9.740239 | 0        | 4.278221 | 3.014938 |
| 1616  | TMSB15B   | 2142.991 | -1.65976 | 0.185741 | -8.9359  | 4.04E-19 | 6.64E-18 | 3721.965 | 2154.613 | 3888.443 | 1053.564 | 1069.555 | 969.8052 |
| 211   | MTHFD2    | 6782.271 | -1.66155 | 0.083811 | -19.8249 | 1.82E-87 | 2.29E-85 | 10594.54 | 9892.279 | 10433.88 | 3229.888 | 3272.839 | 3270.203 |
| 431   | PTK7      | 10504.1  | -1.6638  | 0.10871  | -15.3049 | 7.09E-53 | 4.38E-51 | 16792.21 | 15262.94 | 15862.68 | 5020.054 | 4423.681 | 5663.059 |
| 2981  | ST6GAL1   | 145.6332 | -1.6659  | 0.258266 | -6.45033 | 1.12E-10 | 9.95E-10 | 215.2083 | 225.5337 | 219.1554 | 80.35657 | 81.28621 | 52.25893 |
| 11339 | LOC103231 | 18.24785 | -1.66604 | 0.65376  | -2.5484  | 0.010822 | 0.025373 | 22.76763 | 25.18094 | 34.78657 | 11.16063 | 8.556443 | 7.034856 |
| 4354  | TIAM2     | 75.14099 | -1.66664 | 0.326047 | -5.11164 | 3.19E-07 | 1.95E-06 | 111.1277 | 120.4306 | 110.6213 | 42.41041 | 32.08666 | 34.1693  |
| 14356 | LOC103231 | 11.9634  | -1.66759 | 0.854929 | -1.95056 | 0.05111  | 0.       |          |          |          |          |          |          |



|       |           |           |          |          |          |          |          |          |          |          |          |          |          |
|-------|-----------|-----------|----------|----------|----------|----------|----------|----------|----------|----------|----------|----------|----------|
| 3113  | AOC2      | 127.2585  | -1.67331 | 0.267103 | -6.26468 | 3.74E-10 | 3.19E-09 | 217.3766 | 177.9088 | 188.5432 | 58.0353  | 51.33866 | 70.34856 |
| 8072  | LOC119621 | 39.57911  | -1.67341 | 0.493354 | -3.39191 | 0.000694 | 0.002286 | 52.58238 | 67.87906 | 57.7457  | 24.5534  | 25.66933 | 9.044815 |
| 1238  | NRP2      | 485.1801  | -1.67375 | 0.166855 | -10.0311 | 1.11E-23 | 2.39E-22 | 677.0659 | 853.9624 | 682.5125 | 236.6055 | 243.8586 | 217.0756 |
| 5357  | TCF15     | 72.45554  | -1.67422 | 0.373282 | -4.48513 | 7.29E-06 | 3.62E-05 | 106.791  | 107.2927 | 113.4042 | 37.94616 | 49.19955 | 20.09959 |
| 11500 | TRNAC-GC  | 20.11937  | -1.67577 | 0.666002 | -2.51617 | 0.011864 | 0.027426 | 29.81475 | 28.46541 | 33.39511 | 17.85702 | 2.139111 | 9.044815 |
| 20903 | LOC119621 | 2.229962  | -1.67616 | 1.882816 | -0.89024 | 0.373337 | 0.47482  | 5.420864 | 0.547412 | 4.174388 | 2.232127 | 0        | 1.004979 |
| 701   | DCAF16    | 1428.594  | -1.67828 | 0.130871 | -12.824  | 1.20E-37 | 4.57E-36 | 2096.79  | 2506.051 | 1929.263 | 683.0309 | 660.9852 | 695.4458 |
| 5202  | LOC119615 | 86.47805  | -1.68031 | 0.367084 | -4.57746 | 4.71E-06 | 2.41E-05 | 154.4946 | 94.15483 | 148.1908 | 22.32127 | 53.47777 | 46.22906 |
| 4942  | LOC119621 | 81.76857  | -1.68099 | 0.35626  | -4.71843 | 2.38E-06 | 1.28E-05 | 121.4273 | 113.3142 | 136.3633 | 33.4819  | 59.8951  | 26.12947 |
| 817   | LOC103241 | 1199.764  | -1.68289 | 0.140711 | -11.9599 | 5.76E-33 | 1.87E-31 | 2014.935 | 1596.253 | 1884.736 | 566.9603 | 500.5519 | 635.147  |
| 1363  | JDP2      | 647.6249  | -1.68382 | 0.174034 | -9.67525 | 3.84E-22 | 7.49E-21 | 835.8972 | 1205.948 | 917.6697 | 328.1227 | 318.7275 | 279.3843 |
| 6479  | RIMS4     | 67.84514  | -1.6843  | 0.426619 | -3.94801 | 7.88E-05 | 0.000323 | 116.5486 | 77.73248 | 112.7085 | 37.94616 | 47.06043 | 15.07469 |
| 4795  | LOC103225 | 81.36447  | -1.6864  | 0.350078 | -4.8172  | 1.46E-06 | 8.07E-06 | 147.9896 | 89.77554 | 134.2762 | 46.87467 | 32.08666 | 37.18424 |
| 2063  | ANGPTL8   | 195.3414  | -1.687   | 0.214493 | -7.86506 | 3.69E-15 | 4.75E-14 | 312.2417 | 288.486  | 296.3816 | 82.5887  | 89.84265 | 102.5079 |
| 638   | RAI14     | 5811.196  | -1.68911 | 0.127705 | -13.2267 | 6.16E-40 | 2.57E-38 | 7994.69  | 10716.13 | 7904.204 | 2725.427 | 2718.81  | 2807.913 |
| 21377 | LOC119624 | 1.769694  | -1.69027 | 2.060396 | -0.82036 | 0.412011 | 0.512363 | 4.878777 | 1.642235 | 2.087194 | 0        | 0        | 2.009959 |
| 5059  | PARM1     | 71.54492  | -1.69208 | 0.363436 | -4.65579 | 3.23E-06 | 1.70E-05 | 97.03346 | 133.0211 | 95.3152  | 42.41041 | 36.36488 | 25.12449 |
| 3038  | ALDOC     | 122.144   | -1.69326 | 0.266405 | -6.35596 | 2.07E-10 | 1.81E-09 | 196.7774 | 183.9304 | 180.1944 | 64.73168 | 44.92132 | 62.30873 |
| 297   | ARHGEF2   | 14641.3   | -1.69352 | 0.096678 | -17.5173 | 1.06E-68 | 9.47E-67 | 21586.42 | 24391.03 | 21132.14 | 6843.701 | 6552.096 | 7342.38  |
| 13475 | LOC103225 | 13.07992  | -1.69398 | 0.802219 | -2.11162 | 0.034719 | 0.068498 | 20.0572  | 19.15941 | 20.17621 | 2.232127 | 12.83466 | 4.019918 |
| 1466  | SHROOM3   | 312.9573  | -1.69402 | 0.181555 | -9.33062 | 1.05E-20 | 1.91E-19 | 455.8946 | 526.0628 | 455.0083 | 145.0883 | 136.9031 | 158.7868 |
| 29141 | TRNAN-GL  | 0.502954  | -1.69456 | 3.958986 | -0.42803 | 0.668631 | NA       | 1.626259 | 0        | 1.391463 | 0        | 0        | 0        |
| 29356 | LOC119621 | 0.502954  | -1.69456 | 3.958986 | -0.42803 | 0.668631 | NA       | 1.626259 | 0        | 1.391463 | 0        | 0        | 0        |
| 9302  | P4HA3     | 26.92722  | -1.69487 | 0.55902  | -3.03187 | 0.00243  | 0.006946 | 37.40396 | 43.24553 | 41.04815 | 17.85702 | 14.97377 | 7.034856 |
| 17142 | CLPSL1    | 7.048893  | -1.69565 | 1.150469 | -1.47388 | 0.140514 | 0.217909 | 12.46799 | 7.116354 | 11.82743 | 4.464254 | 6.417332 | 0        |
| 29363 | LOC119621 | 0.503841  | -1.69623 | 3.499409 | -0.48472 | 0.627875 | NA       | 1.084173 | 0.547412 | 1.391463 | 0        | 0        | 0        |
| 28991 | LOC119621 | 0.504729  | -1.69862 | 3.497345 | -0.48569 | 0.627188 | NA       | 0.542086 | 1.094824 | 1.391463 | 0        | 0        | 0        |
| 21437 | LOC103241 | 1.775907  | -1.69882 | 2.089401 | -0.81307 | 0.416179 | 0.516099 | 1.084173 | 5.474118 | 2.087194 | 0        | 0        | 2.009959 |
| 4695  | EPHA10    | 71.30351  | -1.70218 | 0.348357 | -4.88631 | 1.03E-06 | 5.82E-06 | 116.5486 | 101.2712 | 107.1426 | 44.64254 | 32.08666 | 26.12947 |
| 485   | ADAMTSL3  | 2400.31   | -1.70486 | 0.115277 | -14.7893 | 1.72E-49 | 9.41E-48 | 3598.369 | 3922.753 | 3511.356 | 1062.492 | 1039.608 | 1267.279 |
| 8341  | CXCL16    | 32.32605  | -1.70589 | 0.516949 | -3.29992 | 0.000967 | 0.003082 | 56.91907 | 47.62483 | 42.43961 | 13.39276 | 23.53022 | 10.04979 |
| 21948 | LOC119615 | 1.398554  | -1.70609 | 2.316821 | -0.73639 | 0.461493 | 0.558994 | 1.084173 | 4.379295 | 0.695731 | 2.232127 | 0        | 0        |
| 6357  | DNASE1L3  | 46.63376  | -1.70723 | 0.426495 | -4.00293 | 6.26E-05 | 0.000262 | 76.97626 | 55.28859 | 81.40057 | 26.78552 | 19.252   | 20.09959 |
| 4391  | IL18R1    | 78.1819   | -1.70765 | 0.335922 | -5.08347 | 3.71E-07 | 2.24E-06 | 125.222  | 122.6202 | 111.317  | 24.5534  | 49.19955 | 36.17926 |
| 7398  | LOC119624 | 50.43782  | -1.70973 | 0.474846 | -3.60059 | 0.000317 | 0.001141 | 93.23886 | 52.55153 | 89.05362 | 15.62489 | 14.97377 | 37.18424 |
| 17132 | LOC103225 | 5.955168  | -1.71053 | 1.159035 | -1.47582 | 0.139992 | 0.217234 | 3.794605 | 11.49565 | 11.82743 | 4.464254 | 2.139111 | 2.009959 |
| 484   | DEPDC1B   | 989.2529  | -1.71067 | 0.11561  | -14.7968 | 1.54E-49 | 8.44E-48 | 1533.562 | 1476.37  | 1535.479 | 466.5145 | 466.3261 | 457.2657 |
| 15797 | LOC119625 | 8.433142  | -1.71105 | 1.004938 | -1.70264 | 0.088636 | 0.149166 | 13.55216 | 8.211177 | 17.39328 | 0        | 6.417332 | 5.024897 |
| 812   | INHBE     | 600.1271  | -1.71164 | 0.142516 | -12.0101 | 3.14E-33 | 1.03E-31 | 903.1159 | 885.1649 | 969.1538 | 310.2657 | 256.6933 | 276.3694 |
| 276   | COL4A1    | 8197.556  | -1.71185 | 0.095677 | -17.8919 | 1.36E-71 | 1.31E-69 | 12562.85 | 13262.69 | 11865.7  | 3808.009 | 3578.732 | 4107.351 |
| 4701  | MAP1LC3C  | 79.35035  | -1.71324 | 0.350789 | -4.88396 | 1.04E-06 | 5.88E-06 | 143.6529 | 91.41777 | 128.0146 | 37.94616 | 44.92132 | 30.14938 |
| 605   | E2F5      | 808.7116  | -1.71548 | 0.12651  | -13.56   | 6.91E-42 | 3.04E-40 | 1261.435 | 1197.737 | 1255.795 | 401.7829 | 380.7617 | 354.7578 |
| 16902 | LOC119625 | 6.471419  | -1.71557 | 1.138852 | -1.5064  | 0.131964 | 0.207564 | 13.55216 | 8.758589 | 8.348776 | 0        | 2.139111 | 6.029877 |
| 3700  | LOC119621 | 163.1548  | -1.71818 | 0.304701 | -5.63891 | 1.71E-08 | 1.23E-07 | 186.4777 | 364.0289 | 200.3706 | 73.66019 | 77.00798 | 77.38342 |
| 13799 | LOC119621 | 11.06528  | -1.7194  | 0.839947 | -2.04704 | 0.040655 | 0.078325 | 17.34676 | 17.51718 | 15.30609 | 8.928508 | 4.278221 | 3.014938 |
| 1473  | LOC119621 | 314.4344  | -1.71969 | 0.184541 | -9.31874 | 1.18E-20 | 2.12E-19 | 502.5141 | 425.339  | 519.7113 | 136.1597 | 156.1551 | 146.727  |
| 4618  | LOC119621 | 68.65567  | -1.72058 | 0.348519 | -4.93683 | 7.94E-07 | 4.57E-06 | 115.4644 | 91.96518 | 107.8384 | 29.01765 | 38.50399 | 29.1444  |
| 8830  | LOC119621 | 38.46023  | -1.72167 | 0.544348 | -3.16281 | 0.001563 | 0.004704 | 69.38706 | 58.02565 | 48.00546 | 8.928508 | 36.36488 | 10.04979 |
| 4593  | LOC119615 | 70.51067  | -1.72216 | 0.348186 | -4.9461  | 7.57E-07 | 4.38E-06 | 127.9324 | 92.5126  | 103.664  | 35.71403 | 32.08666 | 31.15436 |
| 6169  | LOC119615 | 80.87881  | -1.72668 | 0.422225 | -4.08948 | 4.32E-05 | 0.000186 | 171.8414 | 68.42648 | 134.9719 | 24.5534  | 34.25277 | 51.25395 |
| 893   | NAT16     | 1768.587  | -1.72763 | 0.150218 | -11.5008 | 1.31E-30 | 3.89E-29 | 2341.813 | 3370.962 | 2439.234 | 834.8155 | 776.4972 | 848.2027 |
| 830   | STK32B    | 978.0277  | -1.72819 | 0.145565 | -11.8723 | 1.65E-32 | 5.28E-31 | 1374.731 | 1733.653 | 1404.682 | 404.015  | 455.6306 | 495.4549 |
| 257   | GTPBP2    | 7398.666  | -1.73184 | 0.094945 | -18.2405 | 2.46E-74 | 2.55E-72 | 11551.32 | 11977.37 | 10599.47 | 3287.923 | 3334.874 | 3641.041 |
| 291   | TRIP13    | 2498.381  | -1.73402 | 0.098385 | -17.6248 | 1.59E-69 | 1.45E-67 | 3972.409 | 3761.267 | 3797.998 | 1084.814 | 1165.815 | 1207.985 |
| 7433  | NKX2-8    | 36.33331  | -1.73506 | 0.483773 | -3.58652 | 0.000335 | 0.001199 | 58.00324 | 42.15071 | 66.79021 | 15.62489 | 21.39111 | 14.06971 |
| 18069 | LOC103241 | 4.553749  | -1.73583 | 1.305219 | -1.32992 | 0.183546 | 0.270052 | 5.420864 | 6.568942 | 9.044508 | 0        | 4.278221 | 2.009959 |
| 1897  | LOC119621 | 1730.902  | -1.73616 | 0.211655 | -8.20277 | 2.35E-16 | 3.29E-15 | 3077.966 | 1628.003 | 3278.286 | 892.8508 | 812.8621 | 695.4458 |
| 1428  | SYNE3     | 350.2284  | -1.73641 | 0.183921 | -9.44106 | 3.69E-21 | 6.87E-20 | 535.5813 | 531.5369 | 542.6705 | 167.4095 | 192.52   | 131.6523 |
| 21685 | LOC119615 | 1.405109  | -1.73766 | 2.229168 | -0.77951 | 0.435679 | 0.534126 | 2.710432 | 2.189647 | 1.391463 | 0        | 2.139111 | 0        |
| 2980  | GCNA      | 134.6253  | -1.73771 | 0.26939  | -6.45052 | 1.11E-10 | 9.94E-10 | 185.3935 | 235.3871 | 198.9792 | 53.57105 | 79.14709 | 55.27387 |
| 11172 | GPR37     | 19.24928  | -1.74223 | 0.673587 | -2.58649 | 0.009696 | 0.023072 | 32.52518 | 22.44388 | 35.4823  | 6.696381 | 4.278221 | 14.06971 |
| 10023 | LOC103241 | 26.15747  | -1.74236 | 0.610085 | -2.85594 | 0.004291 | 0.011381 | 48.78777 | 26.27577 | 44.52681 | 8.928508 | 21.39111 | 7.034856 |
| 616   | TMEM170I  | 1521.264  | -1.74466 | 0.12995  | -13.4256 | 4.28E-41 | 1.85E-39 | 2290.857 | 2683.413 | 2055.886 | 676.3345 | 716.6021 | 704.4906 |
| 2225  | PLAC8L1   | 210.9836  | -1.74504 | 0.230848 | -7.55926 | 4.05E-14 | 4.84E-13 | 346.9353 | 315.3092 | 318.645  | 71.42806 | 91.98176 | 121.6025 |
| 295   | NPC2      | 12623.68  | -1.74643 | 0.099475 | -17.5565 | 5.30E-69 | 4.78E-67 | 20539.11 | 17493.09 | 20325.1  | 5839.244 | 5465.428 | 6080.126 |
| 3454  | C5        | 104.2588  | -1.74727 | 0.296295 | -5.89704 | 3.70E-09 | 2.85E-08 | 151.7842 | 164.2235 | 162.8011 | 62.49956 | 47.06043 | 37.18424 |
| 386   | COL4A3    | 2404.538  | -1.74798 | 0.109806 | -15.9188 | 4.69E-57 | 3.23E-55 | 3634.689 | 4059.606 | 3421.607 | 1060.26  | 1163.676 | 1087.388 |
| 379   | KIF1A     | 2087.861  | -1.74832 | 0.108776 | -16.0727 | 3.97E-58 | 2.78E-56 | 3050.862 | 3366.583 | 3245.587 | 910.7078 | 911.2611 | 1042.164 |
| 4952  | LOC119621 | 77.68931  | -1.74866 | 0.371005 | -4.7133  | 2.44E-06 | 1.31E-05 | 140.4004 | 78.8273  | 141.2335 | 31.24978 | 34.22577 | 40.19918 |
| 3128  | STAT5A    | 125.9707  | -1.74912 | 0.280049 | -6.24575 | 4.22E-10 | 3.58E-09 | 198.9457 | 186.12   | 193.4133 | 60.26743 | 74.86887 | 42.20914 |
| 14691 | NAGS      | 9.195053  | -1.74924 | 0.924758 | -1.89157 | 0.058548 | 0.10595  | 17.88885 | 9.306001 | 15.30609 | 2.232127 | 6.417332 | 4.019918 |
| 6405  | LOC103241 | 87.442228 | -1.7497  | 0.439901 | -3.97749 |          |          |          |          |          |          |          |          |



|       |           |          |          |          |          |          |          |          |          |          |          |          |          |
|-------|-----------|----------|----------|----------|----------|----------|----------|----------|----------|----------|----------|----------|----------|
| 9972  | LOC119621 | 22.60877 | -1.75262 | 0.610767 | -2.86954 | 0.004111 | 0.010959 | 41.74065 | 24.08612 | 38.96096 | 13.39276 | 6.417332 | 11.05477 |
| 1300  | CSRN3     | 486.4709 | -1.75367 | 0.177902 | -9.85749 | 6.36E-23 | 1.30E-21 | 694.4126 | 865.4581 | 686.6869 | 212.0521 | 265.2497 | 194.966  |
| 725   | RASL10B   | 810.1489 | -1.75464 | 0.139027 | -12.6209 | 1.62E-36 | 5.94E-35 | 1263.061 | 1263.974 | 1232.14  | 323.6584 | 352.9533 | 425.1063 |
| 5155  | ADAMTS1   | 68.89946 | -1.75529 | 0.381616 | -4.59963 | 4.23E-06 | 2.18E-05 | 102.4543 | 117.1461 | 96.70666 | 26.78552 | 49.19955 | 21.10457 |
| 533   | KCNMB4    | 949.7458 | -1.75843 | 0.123502 | -14.2381 | 5.32E-46 | 2.65E-44 | 1535.189 | 1463.232 | 1404.682 | 430.8005 | 404.2919 | 460.2806 |
| 8115  | NYNRIN    | 32.41163 | -1.75957 | 0.521575 | -3.37357 | 0.000742 | 0.00243  | 48.78777 | 58.57306 | 41.04815 | 15.62489 | 21.39111 | 9.044815 |
| 983   | MFS02A    | 551.1111 | -1.75998 | 0.158944 | -11.0729 | 1.70E-28 | 4.59E-27 | 923.1731 | 761.9972 | 867.577  | 283.4801 | 218.1893 | 252.2498 |
| 27631 | TRNAM-C   | 0.528561 | -1.76227 | 3.922677 | -0.44925 | 0.65325  | NA       | 1.084173 | 0        | 2.087194 | 0        | 0        | 0        |
| 28840 | LOC10321  | 0.528561 | -1.76227 | 3.922677 | -0.44925 | 0.65325  | NA       | 1.084173 | 0        | 2.087194 | 0        | 0        | 0        |
| 4330  | ZCCHC12   | 69.38753 | -1.7623  | 0.343459 | -5.13105 | 2.88E-07 | 1.77E-06 | 95.94929 | 111.1246 | 113.4042 | 33.4819  | 34.22577 | 28.13943 |
| 968   | PDE4B     | 452.2589 | -1.76334 | 0.158297 | -11.1395 | 8.06E-29 | 2.21E-27 | 685.7393 | 721.4888 | 683.2082 | 218.7484 | 222.4675 | 181.9013 |
| 796   | LOC10323  | 866.4838 | -1.76402 | 0.145574 | -12.1177 | 8.52E-34 | 2.84E-32 | 1432.192 | 1237.698 | 1353.198 | 408.4792 | 325.1448 | 442.191  |
| 16169 | LOC11962  | 7.037207 | -1.76512 | 1.081135 | -1.63265 | 0.102543 | 0.1686   | 11.9259  | 8.758589 | 11.82743 | 6.696381 | 0        | 3.014938 |
| 5281  | HPSE      | 58.03173 | -1.76689 | 0.389995 | -4.53053 | 5.88E-06 | 2.96E-05 | 106.2489 | 81.01695 | 80.70484 | 35.71403 | 21.39111 | 23.11453 |
| 931   | RAD21L1   | 436.2741 | -1.76728 | 0.155885 | -11.3371 | 8.60E-30 | 2.46E-28 | 662.4295 | 709.4457 | 649.1174 | 212.0521 | 194.6591 | 189.9411 |
| 4162  | LOC11962  | 113.5486 | -1.76768 | 0.336729 | -5.24957 | 1.52E-07 | 9.74E-07 | 189.7302 | 117.6935 | 221.9383 | 49.10679 | 38.50399 | 64.31869 |
| 552   | MSH5      | 872.0237 | -1.76845 | 0.125192 | -14.1258 | 2.63E-45 | 1.27E-43 | 1425.687 | 1284.776 | 1334.413 | 379.4616 | 412.8484 | 394.9569 |
| 456   | ADCY7     | 3531.661 | -1.77019 | 0.117645 | -15.047  | 3.61E-51 | 2.11E-49 | 5962.408 | 4784.379 | 5645.86  | 1609.364 | 1467.43  | 1720.525 |
| 8789  | LOC11962  | 29.91579 | -1.77056 | 0.557343 | -3.17678 | 0.001489 | 0.004504 | 50.41403 | 38.31883 | 50.09266 | 22.32127 | 4.278221 | 14.06971 |
| 271   | FRMD6     | 4581.451 | -1.77131 | 0.098484 | -17.9857 | 2.52E-72 | 2.47E-70 | 7225.469 | 7189.707 | 6856.433 | 2042.396 | 1914.504 | 2260.199 |
| 1815  | PIGV      | 224.3037 | -1.77478 | 0.210862 | -8.41679 | 3.87E-17 | 5.66E-16 | 349.6457 | 318.5937 | 373.6077 | 84.82083 | 117.6511 | 101.5029 |
| 7160  | LOC11962  | 41.88972 | -1.77547 | 0.482957 | -3.67625 | 0.000237 | 0.000879 | 81.31296 | 39.41365 | 73.05179 | 20.08914 | 21.39111 | 16.07967 |
| 21824 | LOC11962  | 1.176954 | -1.77812 | 2.352298 | -0.75591 | 0.449703 | 0.547742 | 1.084173 | 2.189647 | 2.782925 | 0        | 0        | 1.004979 |
| 22330 | LOC10323  | 1.165759 | -1.77826 | 2.654799 | -0.66983 | 0.502967 | 0.598808 | 3.252518 | 2.737059 | 0        | 0        | 0        | 1.004979 |
| 6616  | LOC10321  | 62.22514 | -1.77837 | 0.456462 | -3.89599 | 9.78E-05 | 0.000393 | 135.5216 | 47.07742 | 107.1426 | 26.78552 | 25.66933 | 31.15436 |
| 8118  | LOC11962  | 29.58986 | -1.77929 | 0.527512 | -3.37298 | 0.000744 | 0.002435 | 37.94605 | 58.02565 | 41.04815 | 15.62489 | 12.83466 | 12.05975 |
| 3956  | LOC10323  | 78.65775 | -1.7794  | 0.329139 | -5.40624 | 6.44E-08 | 4.33E-07 | 127.9324 | 110.5772 | 128.7103 | 35.71403 | 27.80844 | 41.20416 |
| 6724  | AFF2      | 44.2535  | -1.77996 | 0.462708 | -3.84683 | 0.00012  | 0.000473 | 63.96619 | 81.01695 | 58.44144 | 20.08914 | 29.94755 | 12.05975 |
| 2999  | MAMDC2    | 124.0203 | -1.78106 | 0.277498 | -6.41827 | 1.38E-10 | 1.22E-09 | 195.1511 | 215.6803 | 167.6713 | 42.41041 | 59.8951  | 63.31371 |
| 4246  | CYP24A1   | 75.53558 | -1.78274 | 0.343464 | -5.19045 | 2.10E-07 | 1.31E-06 | 116.0065 | 125.9047 | 108.5341 | 24.5534  | 47.06043 | 31.15436 |
| 305   | TBL1X     | 16485.46 | -1.78356 | 0.102871 | -17.3378 | 2.44E-67 | 2.12E-65 | 24800.45 | 28213.6  | 23644.43 | 7100.396 | 7121.099 | 8032.801 |
| 5914  | RAPSN     | 50.20875 | -1.7837  | 0.424194 | -4.20492 | 2.61E-05 | 0.000117 | 96.49137 | 59.66789 | 78.61764 | 20.08914 | 19.252   | 27.13445 |
| 2798  | DLG2      | 184.6205 | -1.78441 | 0.266388 | -6.69852 | 2.11E-11 | 2.00E-10 | 253.1543 | 314.7618 | 284.5541 | 100.4457 | 100.5382 | 54.26889 |
| 4909  | EFHC2     | 73.76381 | -1.78652 | 0.376954 | -6.73935 | 2.14E-06 | 1.16E-05 | 104.6227 | 117.6935 | 117.5786 | 31.24978 | 51.33866 | 20.09959 |
| 1492  | LOC11961  | 261.478  | -1.78661 | 0.19285  | -9.26427 | 1.96E-20 | 3.50E-19 | 433.6691 | 376.0719 | 405.6114 | 111.6063 | 128.3466 | 113.5627 |
| 4918  | LOC10323  | 170.8377 | -1.7867  | 0.377413 | -4.73408 | 2.20E-06 | 1.19E-05 | 333.9252 | 122.6202 | 341.6041 | 64.73168 | 55.61688 | 106.5278 |
| 719   | LOC10323  | 2430.352 | -1.78779 | 0.141188 | -12.6625 | 9.54E-37 | 3.53E-35 | 3488.868 | 4526.001 | 3299.158 | 1008.921 | 1048.164 | 1211     |
| 17224 | LOC11962  | 5.258564 | -1.78883 | 1.222295 | -1.4635  | 0.14333  | 0.221229 | 8.673382 | 4.926706 | 10.43597 | 2.232127 | 4.278221 | 1.004979 |
| 699   | MFNG      | 2263.262 | -1.78932 | 0.139431 | -12.8331 | 1.07E-37 | 4.07E-36 | 3893.806 | 2864.606 | 3779.213 | 912.9399 | 1039.608 | 1089.398 |
| 10927 | TRPA1     | 18.24577 | -1.79126 | 0.676919 | -2.64619 | 0.00814  | 0.019805 | 26.56223 | 25.72836 | 31.30791 | 11.16063 | 10.69555 | 4.019918 |
| 10334 | MATN3     | 20.69234 | -1.79408 | 0.64514  | -2.78092 | 0.00542  | 0.013945 | 30.89892 | 25.18094 | 38.96096 | 13.39276 | 10.69555 | 5.024897 |
| 20906 | LOC11962  | 1.898619 | -1.79932 | 2.021966 | -0.88989 | 0.373527 | 0.474955 | 1.626259 | 2.189647 | 5.565851 | 0        | 0        | 2.009959 |
| 11293 | LCP1      | 18.28573 | -1.79968 | 0.702993 | -2.56003 | 0.010466 | 0.024641 | 24.93597 | 36.12918 | 22.95914 | 6.696381 | 14.97377 | 4.019918 |
| 1967  | NEB       | 289.6835 | -1.80343 | 0.223894 | -8.05484 | 7.96E-16 | 1.08E-14 | 397.8914 | 572.5928 | 378.4779 | 127.2312 | 143.3204 | 118.5876 |
| 342   | RSKR      | 1702.859 | -1.80442 | 0.10908  | -16.5421 | 1.83E-61 | 1.42E-59 | 2737.536 | 2763.882 | 2442.017 | 763.3874 | 746.5496 | 763.7844 |
| 3403  | SMIM1     | 126.8364 | -1.80542 | 0.303774 | -5.94329 | 2.79E-09 | 2.18E-08 | 239.0601 | 141.7797 | 212.1981 | 44.64254 | 62.03421 | 61.30375 |
| 3834  | LOC10322  | 100.9832 | -1.80576 | 0.327739 | -5.50976 | 3.59E-08 | 2.49E-07 | 183.7673 | 125.9047 | 157.931  | 55.80317 | 51.33866 | 31.15436 |
| 2586  | LOC10323  | 226.8209 | -1.80716 | 0.258044 | -7.0033  | 2.50E-12 | 2.57E-11 | 291.1004 | 459.2785 | 304.0346 | 111.6063 | 115.512  | 79.39338 |
| 411   | TAF4B     | 1653.547 | -1.8078  | 0.116301 | -15.5441 | 1.74E-54 | 1.13E-52 | 2563.526 | 2738.154 | 2420.449 | 656.2453 | 770.0798 | 772.8292 |
| 1439  | ZCCHC4    | 290.0334 | -1.80909 | 0.192319 | -9.40676 | 5.12E-21 | 9.45E-20 | 491.1303 | 392.4943 | 470.3144 | 124.9991 | 132.6249 | 128.6374 |
| 16623 | LOC10322  | 6.208945 | -1.80956 | 1.164422 | -1.55404 | 0.120175 | 0.192194 | 7.589209 | 16.96977 | 4.174388 | 2.232127 | 4.278221 | 2.009959 |
| 3906  | DDX60L    | 103.8022 | -1.80989 | 0.332666 | -5.44058 | 5.31E-08 | 3.61E-07 | 162.0838 | 169.6977 | 148.8865 | 42.41041 | 70.59065 | 29.1444  |
| 5726  | LOC11962  | 51.13657 | -1.81105 | 0.420109 | -4.3109  | 1.63E-05 | 7.55E-05 | 72.63957 | 72.80577 | 94.61947 | 26.78552 | 12.83466 | 27.13445 |
| 27298 | LOC11962  | 0.542086 | -1.81168 | 3.954941 | -0.45808 | 0.646895 | NA       | 3.252518 | 0        | 0        | 0        | 0        | 0        |
| 7402  | IL20RB    | 40.61409 | -1.81172 | 0.503297 | -3.59972 | 0.000319 | 0.001144 | 67.7608  | 64.59459 | 54.96278 | 33.4819  | 12.83466 | 10.04979 |
| 3634  | HSD11B1   | 86.48759 | -1.81282 | 0.317542 | -5.70891 | 1.14E-08 | 8.32E-08 | 149.6158 | 114.9565 | 138.4505 | 37.94616 | 42.78221 | 35.17428 |
| 3786  | CELF2     | 176.7259 | -1.81388 | 0.326425 | -5.5568  | 2.75E-08 | 1.93E-07 | 256.4069 | 319.6885 | 243.506  | 87.05295 | 115.512  | 38.18922 |
| 26956 | TRNAE-UU  | 0.543862 | -1.81647 | 3.865444 | -0.46992 | 0.638409 | NA       | 2.168345 | 1.094824 | 0        | 0        | 0        | 0        |
| 27419 | CUNH3orf  | 0.543862 | -1.81647 | 3.865444 | -0.46992 | 0.638409 | NA       | 2.168345 | 1.094824 | 0        | 0        | 0        | 0        |
| 2191  | LOC10323  | 165.9789 | -1.81813 | 0.238485 | -7.62369 | 2.47E-14 | 2.99E-13 | 258.5752 | 276.443  | 244.2017 | 69.19594 | 62.03421 | 85.42325 |
| 3863  | PHOSPHO   | 90.40482 | -1.81818 | 0.331519 | -5.4844  | 4.15E-08 | 2.86E-07 | 111.1277 | 179.0037 | 132.189  | 42.41041 | 38.50399 | 39.1942  |
| 28482 | LOC10321  | 0.546524 | -1.82302 | 3.896792 | -0.46783 | 0.639908 | NA       | 0.542086 | 2.737059 | 0        | 0        | 0        | 0        |
| 4452  | RGS9      | 144.1563 | -1.82628 | 0.362313 | -5.04061 | 4.64E-07 | 2.77E-06 | 238.518  | 198.7105 | 233.07   | 49.10679 | 113.3729 | 32.15934 |
| 9934  | TRNAC-GC  | 21.2962  | -1.82804 | 0.635104 | -2.87834 | 0.003998 | 0.010701 | 30.35684 | 26.27577 | 42.43961 | 6.696381 | 14.97377 | 7.034856 |
| 1410  | LOC10322  | 565.6698 | -1.82913 | 0.192628 | -9.49562 | 2.19E-21 | 4.13E-20 | 1046.769 | 656.3468 | 943.4117 | 252.2303 | 263.1106 | 232.1503 |
| 4169  | TIMP3     | 69.77712 | -1.8306  | 0.348993 | -5.24539 | 1.56E-07 | 9.94E-07 | 102.9964 | 113.8617 | 107.8384 | 33.4819  | 36.36488 | 24.11951 |
| 12879 | CYP39A1   | 11.45008 | -1.83138 | 0.82398  | -2.2226  | 0.026243 | 0.054171 | 20.0572  | 15.87494 | 18.08902 | 2.232127 | 6.417332 | 6.029877 |
| 1382  | DCLK2     | 309.7593 | -1.83207 | 0.190664 | -9.60888 | 7.33E-22 | 1.41E-20 | 506.3087 | 439.5717 | 500.2309 | 142.8561 | 154.016  | 115.5726 |
| 2117  | SAPCD1    | 157.9921 | -1.83586 | 0.23635  | -7.76755 | 8.00E-15 | 1.00E-13 | 258.0331 | 227.7233 | 253.942  | 69.19594 | 72.72976 | 66.32864 |
| 2516  | SERTM1    | 139.7545 | -1.83612 | 0.258555 | -7.10148 | 1.23E-12 | 1.30E-11 | 220.6292 | 245.2405 | 190.6304 | 55.80317 | 59.8951  | 66.32864 |
| 12831 | GRPR      | 17.19228 | -1.83696 | 0.822507 | -2.23337 | 0.025525 | 0.052886 | 20.59928 | 32.84471 | 26.43779 | 0        | 19.252   | 4.019918 |
| 1218  | NMRK1     | 323.8632 | -1.83836 | 0.181916 | -10.1055 | 5.22E-24 | 1.14E-22 | 495.4669 | 520.5    |          |          |          |          |



|       |           |          |          |          |          |          |          |          |          |          |          |          |          |
|-------|-----------|----------|----------|----------|----------|----------|----------|----------|----------|----------|----------|----------|----------|
| 10494 | LOC119621 | 33.03792 | -1.83998 | 0.670091 | -2.74586 | 0.006035 | 0.015289 | 84.02339 | 15.32753 | 57.04997 | 11.16063 | 8.556443 | 22.10955 |
| 1368  | LYAR      | 919.2997 | -1.84154 | 0.190616 | -9.66098 | 4.42E-22 | 8.58E-21 | 1301.007 | 1894.592 | 1118.04  | 357.1403 | 429.9612 | 415.0565 |
| 256   | NXN       | 6136.724 | -1.84469 | 0.101099 | -18.2464 | 2.21E-74 | 2.29E-72 | 9852.962 | 9457.087 | 9501.603 | 2729.891 | 2374.413 | 2904.391 |
| 3202  | LOC119620 | 127.5007 | -1.84498 | 0.299488 | -6.16044 | 7.25E-10 | 6.02E-09 | 183.7673 | 223.8914 | 186.456  | 80.35657 | 51.33866 | 39.1942  |
| 3026  | RUNDC3B   | 107.89   | -1.84613 | 0.289807 | -6.37019 | 1.89E-10 | 1.66E-09 | 160.4576 | 194.3312 | 150.9737 | 53.57105 | 42.78221 | 45.22408 |
| 4531  | NPR1      | 70.18609 | -1.84637 | 0.36975  | -4.99357 | 5.93E-07 | 3.48E-06 | 102.9964 | 96.89189 | 127.3188 | 29.01765 | 42.78221 | 22.10955 |
| 3291  | PSD4      | 94.8433  | -1.85045 | 0.30584  | -6.05038 | 1.45E-09 | 1.17E-08 | 159.9155 | 140.1374 | 143.3207 | 40.17829 | 51.33866 | 34.1693  |
| 15974 | LOC119620 | 6.356921 | -1.85078 | 1.108537 | -1.66957 | 0.095004 | 0.158112 | 12.46799 | 6.02153  | 11.1317  | 2.232127 | 4.278221 | 2.009959 |
| 3147  | LOC103230 | 15016.32 | -1.85104 | 0.297508 | -6.2218  | 4.91E-10 | 4.15E-09 | 26696.67 | 14053.16 | 29793.3  | 6685.22  | 6671.886 | 6197.708 |
| 14508 | TRNAR-CC  | 8.270499 | -1.85229 | 0.963561 | -1.92234 | 0.054563 | 0.099982 | 9.757555 | 15.32753 | 13.91463 | 4.464254 | 2.139111 | 4.019918 |
| 17092 | LOC103210 | 4.875877 | -1.8532  | 1.249305 | -1.48338 | 0.137973 | 0.214604 | 10.84173 | 4.379295 | 7.653045 | 2.232127 | 2.139111 | 2.009959 |
| 6588  | RGS5      | 45.34632 | -1.85322 | 0.47451  | -3.90555 | 9.40E-05 | 0.000379 | 52.58238 | 102.366  | 57.7457  | 15.62489 | 25.66933 | 18.08963 |
| 10215 | LOC119610 | 25.34303 | -1.85423 | 0.659309 | -2.81239 | 0.004918 | 0.012798 | 58.00324 | 21.89647 | 41.04815 | 4.464254 | 8.556443 | 18.08963 |
| 195   | LOC103230 | 3318.55  | -1.85462 | 0.09081  | -20.423  | 1.05E-92 | 1.42E-90 | 5018.636 | 5359.709 | 5219.377 | 1439.722 | 1441.761 | 1432.096 |
| 15978 | LOC119610 | 6.724725 | -1.85536 | 1.111708 | -1.66892 | 0.095132 | 0.158286 | 18.43094 | 6.568942 | 6.957314 | 2.232127 | 2.139111 | 4.019918 |
| 341   | LOC103240 | 4940.762 | -1.86034 | 0.112313 | -16.5638 | 1.27E-61 | 9.92E-60 | 8305.305 | 6655.433 | 8284.769 | 2127.217 | 2092.05  | 2179.8   |
| 19586 | LOC119610 | 2.791561 | -1.8616  | 1.712081 | -1.08733 | 0.27689  | 0.375811 | 4.336691 | 3.831883 | 5.565851 | 0        | 0        | 3.014938 |
| 548   | CHST10    | 877.9222 | -1.86268 | 0.131761 | -14.1368 | 2.25E-45 | 1.09E-43 | 1431.65  | 1451.736 | 1247.446 | 397.3186 | 361.5097 | 377.8723 |
| 12277 | CPN2      | 13.38765 | -1.86501 | 0.793699 | -2.34976 | 0.018785 | 0.040678 | 17.88885 | 24.08612 | 20.17621 | 4.464254 | 10.69555 | 3.014938 |
| 1685  | LOC103210 | 326.8044 | -1.86609 | 0.212853 | -8.76703 | 1.83E-18 | 2.89E-17 | 503.5982 | 570.9505 | 469.6187 | 149.5525 | 96.25998 | 170.8465 |
| 9908  | LOC103240 | 19.23063 | -1.86658 | 0.647431 | -2.88305 | 0.003938 | 0.010568 | 31.44101 | 28.46541 | 29.91645 | 6.696381 | 12.83466 | 6.029877 |
| 2351  | MAB21L3   | 150.047  | -1.8667  | 0.254306 | -7.34037 | 2.13E-13 | 2.41E-12 | 271.0432 | 209.6587 | 224.7212 | 73.66019 | 59.8951  | 61.30375 |
| 462   | ROB03     | 929.4517 | -1.86855 | 0.124891 | -14.9614 | 1.31E-50 | 7.55E-49 | 1451.707 | 1384.952 | 1545.219 | 392.8543 | 382.9008 | 419.0764 |
| 3974  | AMDHD1    | 71.87318 | -1.87008 | 0.346587 | -5.39571 | 6.83E-08 | 4.57E-07 | 125.222  | 101.2712 | 111.317  | 26.78552 | 38.50399 | 28.13943 |
| 14777 | LOC103220 | 8.332033 | -1.87015 | 0.996141 | -1.87739 | 0.060464 | 0.10878  | 8.131296 | 20.80165 | 10.43597 | 4.464254 | 2.139111 | 4.019918 |
| 233   | IGFBP3    | 166089   | -1.87225 | 0.098876 | -18.9354 | 5.82E-80 | 6.65E-78 | 249375.5 | 290936.8 | 242426.9 | 70606.64 | 68207.68 | 74980.51 |
| 21673 | LOC119620 | 1.251114 | -1.87287 | 2.399555 | -0.78051 | 0.435093 | 0.53367  | 1.084173 | 0.547412 | 4.87012  | 0        | 0        | 1.004979 |
| 3675  | WNK2      | 89.19344 | -1.87501 | 0.330412 | -5.67476 | 1.39E-08 | 1.00E-07 | 133.3532 | 126.4521 | 157.931  | 37.94616 | 51.33866 | 28.13943 |
| 275   | NSD2      | 8777.134 | -1.87584 | 0.104772 | -17.904  | 1.10E-71 | 1.06E-69 | 13116.32 | 15553.61 | 12720.75 | 3694.17  | 3668.575 | 3909.37  |
| 2207  | LOC103230 | 162.0293 | -1.87876 | 0.247655 | -7.5862  | 3.29E-14 | 3.97E-13 | 273.2115 | 219.5121 | 270.6395 | 82.5887  | 59.8951  | 66.32864 |
| 227   | ZCCHC17   | 2605.802 | -1.87915 | 0.098632 | -19.052  | 6.32E-81 | 7.37E-79 | 4041.796 | 4333.859 | 3917.663 | 1084.814 | 1140.146 | 1116.532 |
| 28480 | LOC119620 | 0.569469 | -1.87962 | 3.332485 | -0.56403 | 0.572735 | NA       | 1.626259 | 1.094824 | 0.695731 | 0        | 0        | 0        |
| 27852 | LOC119620 | 0.570357 | -1.88172 | 3.330791 | -0.56495 | 0.572109 | NA       | 1.084173 | 1.642235 | 0.695731 | 0        | 0        | 0        |
| 5505  | KRT78     | 53.87447 | -1.8825  | 0.426971 | -4.40897 | 1.04E-05 | 5.02E-05 | 86.19173 | 88.68071 | 76.53045 | 24.5534  | 34.22577 | 13.06473 |
| 6225  | LOC119620 | 44.91362 | -1.88297 | 0.463269 | -4.06453 | 4.81E-05 | 0.000206 | 64.50828 | 94.70224 | 51.48412 | 22.32127 | 21.39111 | 15.07469 |
| 15914 | LOC103210 | 5.914819 | -1.88323 | 1.119445 | -1.68229 | 0.092513 | 0.154548 | 10.29964 | 8.758589 | 9.044508 | 2.232127 | 2.139111 | 3.014938 |
| 18393 | LOC103210 | 4.75802  | -1.88462 | 1.489087 | -1.26562 | 0.205649 | 0.297243 | 8.131296 | 3.284471 | 10.43597 | 6.696381 | 0        | 0        |
| 28002 | CARTPT    | 0.572132 | -1.88512 | 3.834847 | -0.49158 | 0.623019 | NA       | 0        | 2.737059 | 0.695731 | 0        | 0        | 0        |
| 10949 | LOC119620 | 15.80971 | -1.88662 | 0.714763 | -2.63951 | 0.008303 | 0.02016  | 31.44101 | 19.70683 | 23.65487 | 4.464254 | 8.556443 | 7.034856 |
| 216   | COL5A1    | 7626.1   | -1.88958 | 0.096271 | -19.6277 | 8.97E-86 | 1.10E-83 | 12102.62 | 12057.84 | 11885.18 | 3149.531 | 2994.755 | 3566.672 |
| 6351  | CDS1      | 36.41357 | -1.8907  | 0.471959 | -4.00607 | 6.17E-05 | 0.000258 | 58.54533 | 60.76271 | 52.17985 | 20.08914 | 12.83466 | 14.06971 |
| 3877  | LOC103220 | 79.20618 | -1.89084 | 0.345655 | -5.4703  | 4.49E-08 | 3.08E-07 | 152.8684 | 118.241  | 103.664  | 26.78552 | 38.50399 | 35.17428 |
| 4435  | LOC119620 | 65.38314 | -1.89538 | 0.375033 | -5.0539  | 4.33E-07 | 2.59E-06 | 108.4173 | 92.5126  | 109.2298 | 15.62489 | 36.36488 | 30.14938 |
| 3625  | CLGN      | 89.23402 | -1.8967  | 0.331879 | -5.71504 | 1.10E-08 | 8.04E-08 | 118.1748 | 178.4563 | 125.2316 | 35.71403 | 40.6431  | 37.18424 |
| 11777 | LOC119620 | 17.53377 | -1.90222 | 0.775334 | -2.45342 | 0.01415  | 0.03194  | 34.69353 | 17.51718 | 32.00364 | 8.928508 | 0        | 12.05975 |
| 5298  | LOC103220 | 49.56904 | -1.90398 | 0.421328 | -4.51899 | 6.21E-06 | 3.12E-05 | 76.97626 | 68.42648 | 87.66215 | 29.01765 | 19.252   | 16.07967 |
| 1274  | LOX       | 331.0619 | -1.90602 | 0.192108 | -9.92165 | 3.35E-23 | 6.99E-22 | 490.5882 | 597.7737 | 479.3589 | 120.5349 | 160.4333 | 137.6822 |
| 4784  | SPX       | 53.62577 | -1.90749 | 0.395575 | -4.82207 | 1.42E-06 | 7.90E-06 | 75.89209 | 92.5126  | 85.57496 | 17.85702 | 27.80844 | 22.10955 |
| 6899  | LOC103220 | 35.08803 | -1.91035 | 0.505838 | -3.7766  | 0.000159 | 0.000613 | 48.78777 | 63.49977 | 52.17985 | 15.62489 | 21.39111 | 9.044815 |
| 997   | PRICKLE1  | 496.1904 | -1.91046 | 0.173796 | -10.9925 | 4.15E-28 | 1.11E-26 | 755.6684 | 886.8071 | 715.9076 | 183.0344 | 192.52   | 243.205  |
| 1015  | TRIB3     | 3317.989 | -1.91053 | 0.174845 | -10.927  | 8.56E-28 | 2.24E-26 | 6288.202 | 3768.383 | 5675.777 | 1312.491 | 1229.989 | 1633.092 |
| 14562 | LOC119620 | 10.31369 | -1.91341 | 1.000253 | -1.91292 | 0.055758 | 0.101794 | 26.02015 | 6.02153  | 17.39328 | 0        | 6.417332 | 6.029877 |
| 4170  | LOC103210 | 65.13873 | -1.91882 | 0.365824 | -5.24519 | 1.56E-07 | 9.95E-07 | 120.8853 | 96.89189 | 91.14081 | 31.24978 | 23.53022 | 27.13445 |
| 457   | OSBPL6    | 1187.082 | -1.92408 | 0.128232 | -15.0048 | 6.83E-51 | 3.98E-49 | 1789.427 | 2113.557 | 1734.458 | 499.9964 | 485.5781 | 499.4748 |
| 613   | LOC103230 | 1525.499 | -1.92613 | 0.142953 | -13.4739 | 2.23E-41 | 9.66E-40 | 2230.685 | 2894.714 | 2117.806 | 671.8702 | 628.8985 | 609.0176 |
| 264   | RCC1      | 2193.659 | -1.92985 | 0.106736 | -18.0806 | 4.53E-73 | 4.56E-71 | 3478.568 | 3557.082 | 3400.735 | 857.1368 | 868.4789 | 999.9546 |
| 2997  | LOC119610 | 239.0019 | -1.93065 | 0.300655 | -6.42148 | 1.35E-10 | 1.20E-09 | 492.7565 | 218.9647 | 427.1791 | 78.12444 | 98.39909 | 118.5876 |
| 6844  | FGFR2     | 34.66675 | -1.93194 | 0.508502 | -3.79927 | 0.000145 | 0.000564 | 42.28274 | 73.35318 | 48.7012  | 15.62489 | 14.97377 | 13.06473 |
| 4941  | FAM83B    | 63.25349 | -1.93238 | 0.409531 | -4.71851 | 2.38E-06 | 1.28E-05 | 100.8281 | 118.241  | 78.61764 | 37.94616 | 27.80844 | 16.07967 |
| 245   | PTPRF     | 4048.757 | -1.93238 | 0.104043 | -18.5729 | 5.32E-77 | 5.78E-75 | 6283.865 | 6653.243 | 6322.807 | 1689.72  | 1503.795 | 1839.112 |
| 7762  | CILP2     | 26.59634 | -1.93308 | 0.556297 | -3.47491 | 0.000511 | 0.00175  | 45.53526 | 41.6033  | 38.26523 | 11.16063 | 14.97377 | 8.039836 |
| 1612  | AMZ1      | 305.3454 | -1.9366  | 0.216413 | -8.94859 | 3.60E-19 | 5.94E-18 | 543.7126 | 411.6537 | 491.1863 | 136.1597 | 151.8769 | 97.48301 |
| 814   | SYBU      | 456.6862 | -1.93685 | 0.161395 | -12.0006 | 3.53E-33 | 1.15E-31 | 749.1634 | 690.8337 | 727.735  | 187.4987 | 216.0502 | 168.8366 |
| 4832  | CNN1      | 49.91758 | -1.93758 | 0.404115 | -4.79463 | 1.63E-06 | 8.97E-06 | 76.43418 | 84.30142 | 77.22618 | 22.32127 | 17.11289 | 22.10955 |
| 525   | RAB15     | 2630.358 | -1.93963 | 0.135749 | -14.2883 | 2.59E-46 | 1.31E-44 | 3709.497 | 5042.21  | 3768.081 | 1042.403 | 1114.477 | 1105.477 |
| 4008  | PPFIA2    | 93.37646 | -1.94102 | 0.361713 | -5.36617 | 8.04E-08 | 5.33E-07 | 144.195  | 151.0857 | 144.7121 | 42.41041 | 57.75599 | 20.09959 |
| 1979  | KCNT2     | 153.4571 | -1.94119 | 0.241664 | -8.0326  | 9.54E-16 | 1.28E-14 | 255.3227 | 229.3656 | 244.8974 | 60.26743 | 70.59065 | 60.29877 |
| 13696 | LOC103220 | 9.581511 | -1.94297 | 0.939293 | -2.06854 | 0.038589 | 0.074904 | 16.80468 | 15.32753 | 13.91463 | 0        | 6.417332 | 5.024897 |
| 4044  | ATP8B4    | 71.38283 | -1.94613 | 0.36454  | -5.33858 | 9.37E-08 | 6.16E-07 | 93.78094 | 126.4521 | 118.9701 | 22.32127 | 40.6431  | 26.12947 |
| 14254 | LOC119620 | 9.358977 | -1.9465  | 0.98921  | -1.96773 | 0.049099 | 0.091575 | 16.80468 | 16.96977 | 10.43597 | 8.928508 | 0        | 3.014938 |
| 1851  | LOC103230 | 207.2815 | -1.94655 | 0.234659 | -8.29523 | 1.08E-16 | 1.56E-15 | 366.9925 | 296.6972 | 326.9937 | 60.26743 | 96.25998 | 96.47803 |
| 9404  | LOC103230 | 21.57639 | -        |          |          |          |          |          |          |          |          |          |          |



|       |           |          |          |          |          |           |           |          |          |          |          |          |          |
|-------|-----------|----------|----------|----------|----------|-----------|-----------|----------|----------|----------|----------|----------|----------|
| 1093  | LOC10324  | 796.9798 | -1.95374 | 0.185415 | -10.5371 | 5.83E-26  | 1.42E-24  | 1112.903 | 1623.623 | 1068.643 | 316.962  | 290.9191 | 368.8275 |
| 445   | NGF       | 1182.775 | -1.95976 | 0.129295 | -15.1573 | 6.78E-52  | 4.05E-50  | 1747.144 | 2077.428 | 1824.208 | 435.2648 | 509.1083 | 503.4947 |
| 21257 | LOC11962  | 1.315854 | -1.96002 | 2.330236 | -0.84113 | 0.400278  | 0.500606  | 2.168345 | 0.547412 | 4.174388 | 0        | 0        | 1.004979 |
| 127   | IARS1     | 32025.6  | -1.96011 | 0.084531 | -23.188  | 6.01E-119 | 1.26E-116 | 51738.35 | 51786.8  | 49352.4  | 12566.87 | 12764.07 | 13945.1  |
| 21097 | LOC11962  | 1.307322 | -1.96084 | 2.26538  | -0.86557 | 0.386727  | 0.487327  | 2.710432 | 2.737059 | 1.391463 | 0        | 0        | 1.004979 |
| 3816  | KCNN1     | 78.63227 | -1.96513 | 0.355468 | -5.5283  | 3.23E-08  | 2.25E-07  | 133.8953 | 94.15483 | 148.1908 | 35.71403 | 25.66933 | 34.1693  |
| 3970  | LOC10322  | 72.02884 | -1.96815 | 0.364538 | -5.39903 | 6.70E-08  | 4.49E-07  | 108.4173 | 117.6935 | 114.7957 | 37.94616 | 34.22577 | 19.09461 |
| 1018  | L1CAM     | 387.4379 | -1.96858 | 0.180412 | -10.9116 | 1.01E-27  | 2.65E-26  | 601.1738 | 625.1443 | 621.2881 | 138.3919 | 198.9373 | 139.6921 |
| 270   | ANKRD40   | 3768.822 | -1.9731  | 0.109682 | -17.9893 | 2.36E-72  | 2.33E-70  | 5755.331 | 6710.721 | 5562.372 | 1477.668 | 1488.821 | 1618.017 |
| 4658  | MATN2     | 50.45394 | -1.97329 | 0.40157  | -4.91393 | 8.93E-07  | 5.09E-06  | 76.43418 | 85.39624 | 79.31338 | 20.08914 | 21.39111 | 20.09959 |
| 19212 | TRNAE-CU  | 3.195441 | -1.97756 | 1.717348 | -1.15152 | 0.249519  | 0.345278  | 8.131296 | 3.284471 | 3.478657 | 0        | 4.278221 | 0        |
| 1047  | AZIN2     | 403.9849 | -1.97825 | 0.183269 | -10.7942 | 3.67E-27  | 9.31E-26  | 694.9547 | 581.8988 | 661.6405 | 127.2312 | 173.268  | 184.9162 |
| 1435  | PCDH815   | 269.3884 | -1.97825 | 0.20994  | -9.42295 | 4.39E-21  | 8.13E-20  | 379.4605 | 501.9766 | 404.9157 | 113.8385 | 117.6511 | 98.48799 |
| 8664  | LOC10322  | 21.51225 | -1.98031 | 0.616314 | -3.21315 | 0.001313  | 0.004028  | 30.35684 | 39.96106 | 32.00364 | 11.16063 | 8.556443 | 7.034856 |
| 11774 | LOC10322  | 12.0466  | -1.98152 | 0.807498 | -2.4539  | 0.014132  | 0.031908  | 17.34676 | 19.15941 | 20.87194 | 4.464254 | 6.417332 | 4.019918 |
| 5215  | LOC11962  | 89.24393 | -1.98295 | 0.433692 | -4.57225 | 4.83E-06  | 2.46E-05  | 194.0669 | 67.87906 | 166.2798 | 44.64254 | 21.39111 | 41.20416 |
| 942   | LOC11962  | 386.0274 | -1.98432 | 0.176279 | -11.2567 | 2.15E-29  | 6.06E-28  | 584.9112 | 693.0234 | 569.1083 | 169.6417 | 149.7377 | 149.7419 |
| 801   | LOC10321  | 417.9612 | -1.98453 | 0.164337 | -12.076  | 1.41E-33  | 4.69E-32  | 681.9447 | 695.7604 | 620.5924 | 171.8738 | 181.8244 | 155.7718 |
| 19984 | LOC10324  | 2.118448 | -1.98495 | 1.923402 | -1.032   | 0.302072  | 0.401851  | 4.336691 | 2.189647 | 4.174388 | 0        | 0        | 2.009959 |
| 4083  | LOC11962  | 61.07535 | -1.98652 | 0.374158 | -5.30929 | 1.10E-07  | 7.17E-07  | 107.8752 | 87.58589 | 98.09812 | 20.08914 | 25.66933 | 27.13445 |
| 10240 | EFHD1     | 16.98977 | -1.98842 | 0.708774 | -2.80543 | 0.005025  | 0.013046  | 24.93597 | 31.74989 | 23.65487 | 11.16063 | 6.417332 | 4.019918 |
| 20949 | TMEM74B   | 1.333817 | -1.99052 | 2.248963 | -0.88508 | 0.376112  | 0.477299  | 1.626259 | 3.284471 | 2.087194 | 0        | 0        | 1.004979 |
| 28233 | LOC11961  | 0.618909 | -1.99196 | 3.683863 | -0.54073 | 0.588697  | NA        | 1.626259 | 0        | 2.087194 | 0        | 0        | 0        |
| 5205  | DSC2      | 50.75814 | -1.99588 | 0.436204 | -4.57556 | 4.75E-06  | 2.43E-05  | 68.30288 | 94.15483 | 78.61764 | 29.01765 | 21.39111 | 13.06473 |
| 20618 | LOC11961  | 1.610524 | -1.99763 | 2.139308 | -0.93377 | 0.350421  | 0.451835  | 3.794605 | 1.642235 | 2.087194 | 0        | 2.139111 | 0        |
| 331   | TIAM1     | 1924.265 | -2.00265 | 0.119711 | -16.729  | 8.05E-63  | 6.47E-61  | 2963.044 | 3270.238 | 3014.604 | 792.4051 | 663.1243 | 842.1728 |
| 523   | PLCB1     | 1420.47  | -2.00285 | 0.139606 | -14.3465 | 1.12E-46  | 5.69E-45  | 2097.332 | 2681.223 | 2039.884 | 604.9064 | 549.7514 | 549.7238 |
| 494   | LOC11962  | 2077.374 | -2.00337 | 0.136268 | -14.7016 | 6.29E-49  | 3.39E-47  | 3580.48  | 2838.33  | 3566.319 | 801.3336 | 740.1323 | 937.6458 |
| 8140  | LOC10322  | 24.77065 | -2.0047  | 0.595358 | -3.36721 | 0.000759  | 0.00248   | 50.95612 | 38.86624 | 29.22072 | 6.696381 | 12.83466 | 10.04979 |
| 417   | LOC11962  | 950.2084 | -2.00483 | 0.129569 | -15.473  | 5.28E-54  | 3.36E-52  | 1518.384 | 1631.287 | 1409.552 | 388.3901 | 397.8746 | 355.7627 |
| 2371  | RFLNB     | 134.1913 | -2.00686 | 0.274502 | -7.31093 | 2.65E-13  | 2.97E-12  | 211.4137 | 223.344  | 205.9365 | 55.80317 | 68.45154 | 40.19918 |
| 543   | KBTBD8    | 613.1941 | -2.00734 | 0.141674 | -14.1687 | 1.43E-45  | 7.01E-44  | 999.6073 | 921.2941 | 1027.595 | 238.8376 | 239.5804 | 252.2498 |
| 7544  | MAOA      | 26.17219 | -2.01103 | 0.56721  | -3.54547 | 0.000392  | 0.001381  | 34.69353 | 41.6033  | 48.7012  | 11.16063 | 12.83466 | 8.039836 |
| 6080  | IL17F     | 43.18083 | -2.01244 | 0.487131 | -4.13121 | 3.61E-05  | 0.000158  | 82.93921 | 50.9093  | 71.66033 | 17.85702 | 25.66933 | 10.04979 |
| 21291 | LOC11962  | 1.644878 | -2.0133  | 2.409181 | -0.83568 | 0.403336  | 0.503626  | 2.710432 | 4.926706 | 0        | 2.232127 | 0        | 0        |
| 173   | POGLUT3   | 6096.645 | -2.01527 | 0.095329 | -21.1403 | 3.39E-99  | 5.21E-97  | 9601.434 | 10597.35 | 9128.691 | 2390.608 | 2408.639 | 2453.155 |
| 1227  | MAP1LC3A  | 528.2863 | -2.01549 | 0.20008  | -10.0734 | 7.24E-24  | 1.57E-22  | 982.8026 | 618.0279 | 942.716  | 203.1236 | 198.9373 | 224.1104 |
| 603   | LHX1      | 765.6387 | -2.01568 | 0.148491 | -13.5744 | 5.68E-42  | 2.50E-40  | 1156.812 | 1392.068 | 1131.955 | 285.7123 | 335.8404 | 291.444  |
| 1291  | EPOP      | 250.1509 | -2.01631 | 0.204058 | -9.88109 | 5.03E-23  | 1.04E-21  | 401.686  | 391.3994 | 415.3516 | 87.05295 | 89.84265 | 115.5726 |
| 4331  | LOC10321  | 69.01781 | -2.01681 | 0.39307  | -5.13092 | 2.88E-07  | 1.77E-06  | 104.0806 | 105.1031 | 119.6658 | 44.64254 | 23.53022 | 17.08465 |
| 296   | LOC10323  | 3735.019 | -2.01726 | 0.11491  | -17.555  | 5.44E-69  | 4.89E-67  | 6321.269 | 5200.96  | 6454.3   | 1410.704 | 1463.152 | 1559.728 |
| 4102  | CHRD      | 72.45416 | -2.02274 | 0.382024 | -5.29481 | 1.19E-07  | 7.72E-07  | 112.2119 | 102.366  | 130.7975 | 40.17829 | 32.08666 | 17.08465 |
| 393   | SEMA6A    | 5750.593 | -2.0269  | 0.128203 | -15.8101 | 2.65E-56  | 1.79E-54  | 8264.107 | 10984.37 | 8463.572 | 2156.235 | 2169.058 | 2466.22  |
| 434   | TSP0AP1   | 1088.042 | -2.02738 | 0.132762 | -15.2708 | 1.20E-52  | 7.33E-51  | 1767.202 | 1701.903 | 1769.941 | 377.2295 | 506.9692 | 405.0067 |
| 220   | LOC10323  | 4481.086 | -2.02849 | 0.104357 | -19.438  | 3.68E-84  | 4.45E-82  | 7079.106 | 7869.045 | 6650.496 | 1651.774 | 1798.992 | 1837.102 |
| 132   | WARS1     | 11947.55 | -2.02864 | 0.088082 | -23.0313 | 2.27E-117 | 4.56E-115 | 19301.53 | 19667.41 | 18617.08 | 4584.789 | 4483.576 | 5030.927 |
| 666   | ZNF711    | 1082.748 | -2.0288  | 0.155885 | -13.0147 | 1.01E-38  | 4.03E-37  | 1568.256 | 2122.863 | 1529.218 | 412.9435 | 414.9875 | 448.2208 |
| 436   | PSPH      | 9158.718 | -2.03125 | 0.133188 | -15.251  | 1.62E-52  | 9.89E-51  | 15591.49 | 11631.95 | 16927.14 | 3743.277 | 3486.75  | 3571.697 |
| 7404  | SPAG6     | 31.9244  | -2.0326  | 0.564784 | -3.59889 | 0.00032   | 0.001147  | 56.37698 | 41.6033  | 53.57132 | 17.85702 | 17.11289 | 5.024897 |
| 1191  | SCML2     | 249.2387 | -2.0357  | 0.20016  | -10.1704 | 2.69E-24  | 6.00E-23  | 366.9925 | 429.1709 | 406.3071 | 98.21359 | 96.25998 | 98.48799 |
| 2028  | LOC10324  | 150.5981 | -2.03647 | 0.257279 | -7.91542 | 2.46E-15  | 3.23E-14  | 214.1241 | 273.7059 | 237.9401 | 69.19594 | 51.33866 | 57.28383 |
| 15034 | TRNAT-CG  | 7.467233 | -2.04043 | 1.116828 | -1.82699 | 0.067701  | 0.11971   | 20.0572  | 3.831883 | 12.52316 | 2.232127 | 2.139111 | 4.019918 |
| 6062  | RIC3      | 39.47236 | -2.04239 | 0.49329  | -4.14035 | 3.47E-05  | 0.000152  | 58.54533 | 75.54283 | 54.26705 | 22.32127 | 17.11289 | 9.044815 |
| 3001  | ITGA8     | 97.60645 | -2.04391 | 0.318472 | -6.41788 | 1.38E-10  | 1.22E-09  | 169.1309 | 159.8442 | 139.1463 | 40.17829 | 49.19955 | 28.13943 |
| 4312  | LOC11962  | 51.97919 | -2.04701 | 0.397734 | -5.1467  | 2.65E-07  | 1.63E-06  | 82.39713 | 84.84883 | 84.1835  | 20.08914 | 19.252   | 21.10457 |
| 1074  | SLC05A1   | 262.8941 | -2.05018 | 0.192842 | -10.6314 | 2.13E-26  | 5.27E-25  | 435.2954 | 431.9079 | 402.1327 | 100.4457 | 109.0946 | 98.48799 |
| 141   | YARS1     | 5913.893 | -2.05063 | 0.090529 | -22.6516 | 1.35E-113 | 2.54E-111 | 9744.545 | 9585.181 | 9264.359 | 2218.734 | 2220.397 | 2450.14  |
| 1186  | LOC10324  | 331.1197 | -2.05082 | 0.201138 | -10.1961 | 2.06E-24  | 4.63E-23  | 596.8371 | 546.317  | 452.9211 | 154.0168 | 124.0684 | 112.5577 |
| 20688 | TRNAI-AAI | 2.166112 | -2.05088 | 2.220873 | -0.92346 | 0.355769  | 0.45716   | 5.420864 | 0        | 5.565851 | 0        | 0        | 2.009959 |
| 26960 | LOC10322  | 0.646292 | -2.05122 | 3.638752 | -0.56372 | 0.572947  | NA        | 0        | 1.094824 | 2.782925 | 0        | 0        | 0        |
| 6633  | FOXE1     | 29.9169  | -2.05222 | 0.527971 | -3.88701 | 0.000101  | 0.000407  | 45.53526 | 56.38342 | 42.43961 | 13.39276 | 10.69555 | 11.05477 |
| 389   | HSD17B2   | 2248.209 | -2.05245 | 0.12952  | -15.8466 | 1.48E-56  | 1.01E-54  | 3872.665 | 3298.156 | 3701.291 | 975.4395 | 725.1585 | 916.5413 |
| 2175  | MCIDAS    | 124.552  | -2.05304 | 0.268137 | -7.65669 | 1.91E-14  | 2.33E-13  | 204.3666 | 212.9432 | 184.3688 | 51.33892 | 47.06043 | 47.23404 |
| 416   | PAPSS2    | 1649.515 | -2.05342 | 0.132653 | -15.4797 | 4.76E-54  | 3.04E-52  | 2878.479 | 2660.421 | 2448.279 | 571.4245 | 596.8119 | 741.6748 |
| 7293  | SP8       | 32.2375  | -2.0546  | 0.564966 | -3.63669 | 0.000276  | 0.001007  | 48.24569 | 47.62483 | 57.7457  | 13.39276 | 21.39111 | 5.024897 |
| 2822  | ADGRB3    | 137.4171 | -2.05719 | 0.308961 | -6.6584  | 2.77E-11  | 2.61E-10  | 219.545  | 234.8397 | 205.2408 | 53.57105 | 79.14709 | 32.15934 |
| 4464  | RAB42     | 54.62591 | -2.0576  | 0.408782 | -5.03348 | 4.82E-07  | 2.87E-06  | 92.69677 | 82.65918 | 90.44508 | 11.16063 | 25.66933 | 25.12449 |
| 18757 | VAX2      | 3.134445 | -2.05938 | 1.68272  | -1.22384 | 0.221013  | 0.313252  | 2.710432 | 8.211177 | 4.87012  | 0        | 0        | 3.014938 |
| 18647 | LOC11962  | 4.062069 | -2.0597  | 1.669663 | -1.2336  | 0.217352  | 0.309878  | 8.673382 | 0.547412 | 11.1317  | 0        | 0        | 4.019918 |
| 816   | SLC27A2   | 456.9313 | -2.06022 | 0.172101 | -11.971  | 5.04E-33  | 1.64E-31  | 743.2004 | 815.6436 | 653.9875 | 191.9629 | 151.8769 | 184.9162 |
| 2188  | STC2      | 197.7757 | -2.06154 | 0.270231 | -7.6288  | 2.37E-14  | 2.88E-13  | 320.373  | 330.0893 | 299.8602 | 95.98146 | 94.12087 | 46.22906 |
| 15811 | DDIT4L    | 4.747066 | -2.06239 | 1.213795 | -1.69912 | 0.089296  | 0.150145  | 12.46799 | 4.926706 | 9.044508 | 2.232127 | 2.1      |          |



|       |           |          |          |          |          |          |          |          |          |          |          |          |          |
|-------|-----------|----------|----------|----------|----------|----------|----------|----------|----------|----------|----------|----------|----------|
| 21499 | LOC119621 | 1.393232 | -2.06881 | 2.575644 | -0.80322 | 0.421847 | 0.521643 | 5.96295  | 0        | 1.391463 | 0        | 0        | 1.004979 |
| 20644 | LOC119621 | 1.396782 | -2.06981 | 2.228043 | -0.92898 | 0.352898 | 0.454468 | 3.794605 | 2.189647 | 1.391463 | 0        | 0        | 1.004979 |
| 319   | KCTD15    | 1144.937 | -2.07531 | 0.122521 | -16.9384 | 2.34E-64 | 1.95E-62 | 1958.558 | 1848.062 | 1751.852 | 417.4077 | 421.4048 | 472.3404 |
| 12898 | LOC103221 | 9.927616 | -2.07785 | 0.936305 | -2.21921 | 0.026473 | 0.054561 | 10.29964 | 22.9913  | 14.61036 | 2.232127 | 6.417332 | 3.014938 |
| 2750  | HMCN1     | 95.85197 | -2.07917 | 0.30683  | -6.77628 | 1.23E-11 | 1.19E-10 | 152.3263 | 163.1287 | 147.4951 | 44.64254 | 36.36488 | 31.15436 |
| 1456  | NKAIN1    | 226.4251 | -2.08489 | 0.22292  | -9.35264 | 8.55E-21 | 1.56E-19 | 342.5986 | 429.7183 | 327.6895 | 78.12444 | 91.98176 | 88.43819 |
| 637   | EAF2      | 544.0829 | -2.08494 | 0.157599 | -13.2294 | 5.94E-40 | 2.48E-38 | 931.8465 | 777.3248 | 932.9758 | 216.5163 | 196.7982 | 209.0357 |
| 18749 | LOC119618 | 2.767196 | -2.08885 | 1.705787 | -1.22457 | 0.220738 | 0.312994 | 2.168345 | 7.116354 | 4.174388 | 0        | 2.139111 | 1.004979 |
| 16396 | LOC119621 | 4.945605 | -2.09005 | 1.31541  | -1.5889  | 0.112083 | 0.181735 | 4.878777 | 12.59047 | 6.957314 | 2.232127 | 0        | 3.014938 |
| 1044  | MYO3A     | 364.7755 | -2.09458 | 0.193805 | -10.8077 | 3.17E-27 | 8.06E-26 | 567.5644 | 687.5492 | 516.2327 | 127.2312 | 160.4333 | 129.6424 |
| 28202 | LOC119619 | 0.660704 | -2.09459 | 3.148024 | -0.66537 | 0.505815 | NA       | 1.626259 | 1.642235 | 0.695731 | 0        | 0        | 0        |
| 929   | NAT8L     | 521.3923 | -2.09462 | 0.184665 | -11.3428 | 8.05E-30 | 2.30E-28 | 894.9846 | 682.6225 | 957.3264 | 225.4448 | 168.9897 | 198.9859 |
| 9936  | LOC103216 | 16.79508 | -2.09612 | 0.728431 | -2.87758 | 0.004007 | 0.010722 | 24.39389 | 33.39212 | 23.65487 | 11.16063 | 2.139111 | 6.029877 |
| 27651 | TRNAR-UC  | 0.661592 | -2.09638 | 3.156817 | -0.66408 | 0.506639 | NA       | 1.084173 | 2.189647 | 0.695731 | 0        | 0        | 0        |
| 27907 | LOC103215 | 0.662479 | -2.09809 | 3.197424 | -0.65618 | 0.511708 | NA       | 0.542086 | 2.737059 | 0.695731 | 0        | 0        | 0        |
| 2486  | MAP7D2    | 131.7778 | -2.09816 | 0.293453 | -7.14988 | 8.69E-13 | 9.29E-12 | 206.5349 | 228.8181 | 201.7621 | 44.64254 | 72.72976 | 36.17926 |
| 20702 | LOC119624 | 1.434472 | -2.10024 | 2.280752 | -0.92085 | 0.357127 | 0.458613 | 0.542086 | 2.189647 | 4.87012  | 0        | 0        | 1.004979 |
| 2864  | AXIN2     | 91.63657 | -2.1037  | 0.319145 | -6.59167 | 4.35E-11 | 4.04E-10 | 131.727  | 162.0339 | 150.278  | 42.41041 | 34.22577 | 29.1444  |
| 4565  | LOC119621 | 49.00738 | -2.10737 | 0.424579 | -4.96343 | 6.93E-07 | 4.03E-06 | 72.63957 | 88.1333  | 76.53045 | 24.5534  | 17.11289 | 15.07469 |
| 5243  | LOC103241 | 91.36156 | -2.1096  | 0.462896 | -4.55739 | 5.18E-06 | 2.63E-05 | 226.5921 | 62.95236 | 157.931  | 26.78552 | 25.66933 | 48.23901 |
| 18604 | LOC119620 | 2.825038 | -2.11295 | 1.710659 | -1.23517 | 0.216767 | 0.309759 | 6.505036 | 1.642235 | 5.565851 | 2.232127 | 0        | 1.004979 |
| 8463  | GLS2      | 24.85474 | -2.11879 | 0.649004 | -3.26468 | 0.001096 | 0.003443 | 48.24569 | 41.05589 | 31.30791 | 2.232127 | 19.252   | 7.034856 |
| 7158  | KIAA0040  | 27.06141 | -2.11944 | 0.576288 | -3.67774 | 0.000235 | 0.000874 | 37.40396 | 55.28859 | 38.96096 | 6.696381 | 14.97377 | 9.044815 |
| 4502  | ITGA11    | 56.59921 | -2.11987 | 0.423086 | -5.01049 | 5.43E-07 | 3.21E-06 | 91.07051 | 88.1333  | 93.92374 | 22.32127 | 32.08666 | 12.05975 |
| 7449  | ANKRD1    | 30.10568 | -2.12002 | 0.591802 | -3.58231 | 0.000341 | 0.001215 | 40.65648 | 72.25836 | 33.39511 | 17.85702 | 6.417332 | 10.04979 |
| 9143  | FAM241A   | 18.08115 | -2.12179 | 0.691622 | -3.06784 | 0.002156 | 0.006269 | 20.0572  | 35.58177 | 32.69937 | 6.696381 | 6.417332 | 7.034856 |
| 433   | EPB41L2   | 9958.402 | -2.1219  | 0.138672 | -15.3016 | 7.47E-53 | 4.58E-51 | 14022.15 | 20301.31 | 14265.28 | 3653.992 | 3719.913 | 3787.768 |
| 18331 | LOC103241 | 2.855084 | -2.13019 | 1.666516 | -1.27823 | 0.201168 | 0.29175  | 3.252518 | 4.379295 | 6.261582 | 2.232127 | 0        | 1.004979 |
| 4638  | LOC119621 | 58.92634 | -2.13436 | 0.433423 | -4.92442 | 8.46E-07 | 4.85E-06 | 107.8752 | 60.76271 | 120.3615 | 22.32127 | 17.11289 | 25.12449 |
| 9157  | LOC103231 | 18.04024 | -2.14052 | 0.69856  | -3.06418 | 0.002183 | 0.006337 | 29.81475 | 31.20247 | 28.52499 | 2.232127 | 6.417332 | 10.04979 |
| 19323 | LOC103221 | 2.319769 | -2.14215 | 1.893351 | -1.13141 | 0.257884 | 0.354808 | 3.252518 | 6.568942 | 2.087194 | 0        | 0        | 2.009959 |
| 27925 | LOC119621 | 0.685424 | -2.14347 | 3.083967 | -0.69504 | 0.487032 | NA       | 1.626259 | 1.094824 | 1.391463 | 0        | 0        | 0        |
| 12395 | LOC119621 | 11.22823 | -2.14426 | 0.923428 | -2.32206 | 0.020229 | 0.043389 | 24.39389 | 9.306001 | 22.2634  | 2.232127 | 2.139111 | 7.034856 |
| 20189 | FAM183A   | 1.74178  | -2.14633 | 2.148987 | -0.99876 | 0.31791  | 0.418626 | 4.878777 | 2.737059 | 0.695731 | 0        | 2.139111 | 0        |
| 3790  | PCDHB10   | 67.168   | -2.15295 | 0.387574 | -5.55495 | 2.78E-08 | 1.95E-07 | 103.5385 | 139.0426 | 86.27069 | 20.08914 | 29.94755 | 24.11951 |
| 17769 | LOC103221 | 3.498507 | -2.15373 | 1.565618 | -1.37564 | 0.168932 | 0.252436 | 4.336691 | 6.02153  | 6.261582 | 2.232127 | 2.139111 | 0        |
| 2885  | TMEM92    | 80.28993 | -2.1606  | 0.328895 | -6.56927 | 5.06E-11 | 4.66E-10 | 123.5957 | 135.7581 | 134.2762 | 29.01765 | 29.94755 | 29.1444  |
| 17267 | LOC103221 | 4.038462 | -2.16262 | 1.48518  | -1.45613 | 0.145356 | 0.223783 | 10.84173 | 2.189647 | 6.957314 | 2.232127 | 0        | 2.009959 |
| 2239  | BMPER     | 112.9255 | -2.16727 | 0.287741 | -7.53203 | 5.00E-14 | 5.93E-13 | 191.8986 | 174.6244 | 185.0645 | 46.87467 | 44.92132 | 34.1693  |
| 4849  | NT5C      | 46.284   | -2.1703  | 0.453829 | -4.78219 | 1.73E-06 | 9.51E-06 | 86.73382 | 64.59459 | 73.74753 | 22.32127 | 19.252   | 11.05477 |
| 1695  | LOC119621 | 170.1346 | -2.17064 | 0.24828  | -8.74271 | 2.28E-18 | 3.57E-17 | 300.3158 | 268.2318 | 262.9865 | 78.12444 | 59.8951  | 51.25395 |
| 2018  | BATF3     | 167.3369 | -2.1707  | 0.273363 | -7.94073 | 2.01E-15 | 2.65E-14 | 310.6155 | 201.995  | 310.2962 | 58.0353  | 57.75599 | 65.32367 |
| 18171 | LOC103231 | 3.637609 | -2.17168 | 1.660156 | -1.30812 | 0.190833 | 0.279197 | 4.336691 | 3.284471 | 9.740239 | 4.464254 | 0        | 0        |
| 226   | DDIT4     | 8744.817 | -2.17197 | 0.11349  | -19.1379 | 1.22E-81 | 1.44E-79 | 15618.59 | 12174.44 | 15151.64 | 3066.942 | 3150.91  | 3306.382 |
| 8277  | LOC119621 | 20.77829 | -2.17246 | 0.654178 | -3.32089 | 0.000897 | 0.002882 | 37.40396 | 31.20247 | 34.09084 | 2.232127 | 10.69555 | 9.044815 |
| 873   | ABCA5     | 334.8836 | -2.17683 | 0.186585 | -11.6667 | 1.89E-31 | 5.74E-30 | 554.0123 | 603.7952 | 489.0992 | 113.8385 | 121.9293 | 126.6274 |
| 14103 | TRNAR-CC1 | 7.480752 | -2.17785 | 1.092469 | -1.99351 | 0.046206 | 0.087101 | 12.46799 | 9.853413 | 15.30609 | 2.232127 | 0        | 5.024897 |
| 185   | AKNA      | 2305.038 | -2.17857 | 0.10523  | -20.7029 | 3.26E-95 | 4.69E-93 | 3745.275 | 3841.189 | 3747.905 | 747.7625 | 872.7572 | 875.3371 |
| 365   | MRC2      | 1537.375 | -2.18483 | 0.134774 | -16.2111 | 4.21E-59 | 3.07E-57 | 2685.496 | 2155.16  | 2725.876 | 555.7996 | 506.9692 | 594.9478 |
| 1280  | HBA       | 227.1326 | -2.18557 | 0.220653 | -9.90504 | 3.96E-23 | 8.22E-22 | 364.282  | 357.4599 | 400.0455 | 80.35657 | 64.17332 | 96.47803 |
| 2842  | LOC119618 | 91.53124 | -2.18723 | 0.330255 | -6.62287 | 3.52E-11 | 3.30E-10 | 159.3734 | 170.2451 | 119.6658 | 31.24978 | 38.50399 | 30.14938 |
| 12392 | LOC119615 | 9.417105 | -2.18913 | 0.942459 | -2.32279 | 0.020191 | 0.043317 | 16.80468 | 16.42235 | 12.52316 | 4.464254 | 4.278221 | 2.009959 |
| 15019 | OPRD1     | 6.467366 | -2.18938 | 1.196407 | -1.82996 | 0.067256 | 0.119049 | 10.84173 | 11.49565 | 9.044508 | 0        | 6.417332 | 1.004979 |
| 27314 | TRNAA-CG  | 0.709257 | -2.19002 | 3.497512 | -0.62616 | 0.531207 | NA       | 2.168345 | 0        | 2.087194 | 0        | 0        | 0        |
| 26592 | TRNAN-GL  | 0.710144 | -2.1908  | 3.078187 | -0.71172 | 0.476639 | NA       | 1.626259 | 0.547412 | 2.087194 | 0        | 0        | 0        |
| 2815  | LOC103218 | 83.20042 | -2.19348 | 0.328803 | -6.6711  | 2.54E-11 | 2.40E-10 | 128.4745 | 134.6633 | 145.4079 | 35.71403 | 27.80844 | 27.13445 |
| 234   | TMEM190   | 1113.415 | -2.19434 | 0.11594  | -18.9265 | 6.90E-80 | 7.84E-78 | 1823.036 | 1875.433 | 1785.247 | 390.6222 | 402.1528 | 404.0017 |
| 267   | ANKRD50   | 5183.835 | -2.20397 | 0.122198 | -18.036  | 1.02E-72 | 1.01E-70 | 7935.06  | 9824.4   | 7805.41  | 1801.326 | 1702.732 | 2034.078 |
| 4274  | TBC1D30   | 73.87452 | -2.20931 | 0.426859 | -5.17575 | 2.27E-07 | 1.41E-06 | 111.1277 | 137.9478 | 111.317  | 29.01765 | 42.78221 | 11.05477 |
| 1420  | CUNH3orf1 | 183.7298 | -2.21119 | 0.233657 | -9.4634  | 2.98E-21 | 5.58E-20 | 306.2788 | 295.6024 | 301.2517 | 66.96381 | 77.00798 | 55.27387 |
| 912   | SLC25A43  | 294.9984 | -2.21836 | 0.194354 | -11.414  | 3.56E-30 | 1.04E-28 | 464.568  | 535.3688 | 459.8784 | 98.21359 | 98.39909 | 113.5627 |
| 3782  | B3GAT1    | 53.89239 | -2.2246  | 0.399957 | -5.56209 | 2.67E-08 | 1.87E-07 | 91.6126  | 88.1333  | 86.27069 | 17.85702 | 21.39111 | 18.08963 |
| 2856  | CSKMT     | 2846.908 | -2.22461 | 0.336894 | -6.6033  | 4.02E-11 | 3.74E-10 | 6000.354 | 2833.404 | 5239.553 | 982.1359 | 815.0012 | 1211     |
| 10179 | LOC103215 | 14.92269 | -2.22635 | 0.789582 | -2.81965 | 0.004808 | 0.012556 | 20.59928 | 35.03436 | 18.08902 | 2.232127 | 8.556443 | 5.024897 |
| 337   | RBP1      | 700.6588 | -2.22749 | 0.134008 | -16.622  | 4.83E-62 | 3.81E-60 | 1141.092 | 1158.323 | 1162.567 | 258.9267 | 243.8586 | 239.1851 |
| 9081  | LOC119621 | 17.40047 | -2.22881 | 0.721484 | -3.08921 | 0.002007 | 0.005875 | 35.7777  | 18.612   | 32.00364 | 6.696381 | 4.278221 | 7.034856 |
| 845   | COLCA2    | 431.3264 | -2.23276 | 0.189258 | -11.7975 | 4.02E-32 | 1.27E-30 | 642.3723 | 815.0962 | 681.8167 | 154.0168 | 119.7902 | 174.8664 |
| 3575  | RNF144B   | 57.75426 | -2.23316 | 0.386409 | -5.77925 | 7.50E-09 | 5.58E-08 | 94.86511 | 97.98671 | 93.228   | 20.08914 | 19.252   | 21.10457 |
| 21966 | LOC103241 | 0.736639 | -2.24004 | 3.054282 | -0.73341 | 0.463308 | 0.560733 | 0.542086 | 1.094824 | 2.782925 | 0        | 0        | 0        |
| 10925 | PTGDR2    | 17.03237 | -2.24006 | 0.846464 | -2.64638 | 0.008136 | 0.019798 | 30.35684 | 28.46541 | 23.65487 | 11.16063 | 8.556443 | 0        |
| 768   | THRB      | 395.8585 | -2.24263 | 0.181817 | -12.3346 | 5.90E-35 | 2.04E-33 | 618.5205 | 738.4585 | 606.6778 | 118.3027 | 145.4595 | 147.732  |
| 7476  | KL        | 52.2926  | -2.24704 | 0.629285 | -3.57078 | 0.000356 | 0.001266 | 69.38706 | 89.22813 | 97.40239 | 26.78552 | 29.94755 | 1.004979 |
| 258   | HS3ST3A1  | 17       |          |          |          |          |          |          |          |          |          |          |          |



|       |           |          |          |          |          |           |           |          |          |          |          |          |          |
|-------|-----------|----------|----------|----------|----------|-----------|-----------|----------|----------|----------|----------|----------|----------|
| 594   | LOC103226 | 548.1696 | -2.25639 | 0.165208 | -13.6579 | 1.81E-42  | 8.11E-41  | 994.1864 | 832.066  | 894.0148 | 158.481  | 220.3284 | 189.9411 |
| 14719 | SH3GL2    | 6.142297 | -2.25989 | 1.198624 | -1.88541 | 0.059375  | 0.107241  | 5.96295  | 7.116354 | 17.39328 | 2.232127 | 2.139111 | 2.009959 |
| 1102  | GLI1      | 217.0194 | -2.26137 | 0.215009 | -10.5175 | 7.17E-26  | 1.73E-24  | 350.7299 | 383.7357 | 343.6913 | 78.12444 | 68.45154 | 77.38342 |
| 3715  | ERICH2    | 70.42482 | -2.26208 | 0.401718 | -5.63102 | 1.79E-08  | 1.28E-07  | 87.81799 | 153.2753 | 106.4469 | 31.24978 | 25.66933 | 18.08963 |
| 1014  | SLC40A1   | 235.9373 | -2.26227 | 0.207032 | -10.9271 | 8.55E-28  | 2.24E-26  | 413.0698 | 372.7874 | 384.0437 | 87.05295 | 81.28621 | 77.38342 |
| 4279  | TEAD2     | 56.483   | -2.26306 | 0.43782  | -5.16892 | 2.35E-07  | 1.46E-06  | 95.94929 | 105.6505 | 75.83472 | 29.01765 | 21.39111 | 11.05477 |
| 2790  | IGSF23    | 86.95879 | -2.26599 | 0.337382 | -6.7164  | 1.86E-11  | 1.77E-10  | 157.7471 | 156.5598 | 118.2743 | 33.4819  | 23.53022 | 32.15934 |
| 269   | ENPP1     | 1962.371 | -2.26624 | 0.125797 | -18.015  | 1.49E-72  | 1.47E-70  | 3110.492 | 3724.043 | 2915.114 | 651.7811 | 682.3763 | 690.4209 |
| 1009  | SLCO4C1   | 320.7328 | -2.26797 | 0.20702  | -10.9553 | 6.26E-28  | 1.65E-26  | 467.2785 | 642.1141 | 483.5333 | 113.8385 | 109.0946 | 108.5378 |
| 3940  | HPCA      | 59.34204 | -2.27148 | 0.419629 | -5.41307 | 6.20E-08  | 4.18E-07  | 93.78094 | 122.0728 | 77.22618 | 20.08914 | 27.80844 | 15.07469 |
| 4347  | LOC103236 | 44.93803 | -2.27315 | 0.443861 | -5.1213  | 3.03E-07  | 1.86E-06  | 68.84497 | 81.01695 | 73.05179 | 13.39276 | 19.252   | 14.06971 |
| 857   | GRIP1     | 334.6583 | -2.27545 | 0.193844 | -11.7385 | 8.09E-32  | 2.51E-30  | 536.6655 | 578.0669 | 542.6705 | 136.1597 | 121.9293 | 92.45811 |
| 6972  | LOC103240 | 25.74714 | -2.27611 | 0.607512 | -3.74662 | 0.000179  | 0.000683  | 52.04029 | 30.65506 | 46.614   | 6.696381 | 6.417332 | 12.05975 |
| 16751 | LOC103241 | 4.3207   | -2.27726 | 1.485725 | -1.53276 | 0.125335  | 0.198916  | 10.29964 | 1.642235 | 9.740239 | 2.232127 | 0        | 2.009959 |
| 3306  | LOC103214 | 70.48378 | -2.27762 | 0.377444 | -6.03434 | 1.60E-09  | 1.28E-08  | 129.5586 | 116.0513 | 107.8384 | 22.32127 | 14.97377 | 32.15934 |
| 209   | VEGFA     | 11404.75 | -2.27988 | 0.114583 | -19.8971 | 4.31E-88  | 5.48E-86  | 17282.26 | 21961.07 | 17505.99 | 3859.348 | 3713.496 | 4106.346 |
| 2495  | LOC103246 | 113.1135 | -2.28172 | 0.319486 | -7.14185 | 9.21E-13  | 9.81E-12  | 226.5921 | 139.0426 | 197.5877 | 33.4819  | 42.78221 | 39.1942  |
| 3417  | LYPD6     | 62.01018 | -2.2824  | 0.384881 | -5.93014 | 3.03E-09  | 2.35E-08  | 98.11763 | 101.8186 | 107.1426 | 20.08914 | 27.80844 | 17.08465 |
| 199   | LTBP1     | 1732.985 | -2.28625 | 0.112588 | -20.3063 | 1.13E-91  | 1.51E-89  | 2783.071 | 3059.485 | 2793.361 | 571.4245 | 560.447  | 630.1221 |
| 3211  | GABRQ     | 113.9783 | -2.28673 | 0.371742 | -6.15139 | 7.68E-10  | 6.36E-09  | 182.6831 | 203.6372 | 176.02   | 42.41041 | 62.03421 | 17.08465 |
| 705   | NSUN7     | 400.7778 | -2.28689 | 0.178895 | -12.7834 | 2.03E-37  | 7.65E-36  | 614.7259 | 753.7861 | 628.9412 | 136.1597 | 128.3466 | 142.7071 |
| 2146  | CUNH11or  | 126.3465 | -2.2998  | 0.299029 | -7.69089 | 1.46E-14  | 1.81E-13  | 190.8144 | 238.6716 | 197.5877 | 37.94616 | 59.8951  | 33.16432 |
| 194   | CCN1      | 2847.594 | -2.3005  | 0.112446 | -20.4586 | 5.03E-93  | 6.90E-91  | 4425.593 | 5287.451 | 4485.38  | 1002.225 | 958.3216 | 926.5911 |
| 13470 | LOC119627 | 7.48112  | -2.30186 | 1.089368 | -2.11302 | 0.034599  | 0.068286  | 11.38381 | 19.15941 | 6.957314 | 2.232127 | 2.139111 | 3.014938 |
| 2990  | KCNH1     | 72.24623 | -2.30276 | 0.357603 | -6.43942 | 1.20E-10  | 1.07E-09  | 120.8853 | 121.5254 | 116.1871 | 31.24978 | 23.53022 | 20.09959 |
| 2989  | WNK3      | 115.1138 | -2.30391 | 0.357718 | -6.44057 | 1.19E-10  | 1.06E-09  | 168.0468 | 211.301  | 189.9347 | 42.41041 | 59.8951  | 19.09461 |
| 9288  | LOC119626 | 18.02282 | -2.31415 | 0.762628 | -3.03445 | 0.00241   | 0.006896  | 33.60935 | 23.53871 | 31.30791 | 13.39276 | 4.278221 | 2.009959 |
| 1832  | FGD3      | 133.1372 | -2.31605 | 0.276887 | -8.3646  | 6.03E-17  | 8.75E-16  | 232.013  | 199.8053 | 230.2871 | 51.33892 | 49.19955 | 36.17926 |
| 3176  | LOC103226 | 66.44823 | -2.31873 | 0.374605 | -6.18979 | 6.02E-10  | 5.04E-09  | 125.222  | 95.79707 | 110.6213 | 24.5534  | 21.39111 | 21.10457 |
| 1594  | FAM160A1  | 172.814  | -2.32132 | 0.25802  | -8.99666 | 2.33E-19  | 3.88E-18  | 297.6054 | 323.5204 | 240.0273 | 58.0353  | 68.45154 | 49.24399 |
| 21716 | LOC119619 | 0.774884 | -2.32157 | 2.992928 | -0.77569 | 0.437934  | 0.536124  | 2.710432 | 0.547412 | 1.391463 | 0        | 0        | 0        |
| 7788  | LOC103226 | 21.04363 | -2.32432 | 0.67007  | -3.46877 | 0.000523  | 0.001785  | 41.19856 | 24.63353 | 38.96096 | 11.16063 | 4.278221 | 6.029877 |
| 345   | PAK3      | 1375.503 | -2.32603 | 0.14102  | -16.4943 | 4.03E-61  | 3.11E-59  | 2082.696 | 2696.003 | 2101.109 | 435.2648 | 487.7172 | 450.2308 |
| 17229 | LOC103228 | 3.915421 | -2.33042 | 1.592786 | -1.46311 | 0.143437  | 0.221329  | 7.589209 | 6.568942 | 4.87012  | 4.464254 | 0        | 0        |
| 2613  | CD160     | 95.56096 | -2.33157 | 0.335104 | -6.95773 | 3.46E-12  | 3.52E-11  | 164.2522 | 139.59   | 171.1499 | 33.4819  | 42.78221 | 22.10955 |
| 3415  | IGFBP5    | 79.29179 | -2.33521 | 0.393604 | -5.93289 | 2.98E-09  | 2.32E-08  | 119.259  | 148.3486 | 125.2316 | 33.4819  | 36.36488 | 13.06473 |
| 19696 | LOC119627 | 1.643106 | -2.33528 | 2.180458 | -1.071   | 0.284169  | 0.383568  | 5.420864 | 2.737059 | 0.695731 | 0        | 0        | 1.004979 |
| 20106 | TRNAG-GC  | 1.955727 | -2.33613 | 2.309149 | -1.01168 | 0.311689  | 0.412128  | 5.420864 | 0        | 4.174388 | 0        | 2.139111 | 0        |
| 2454  | LOC103226 | 155.4855 | -2.33855 | 0.325088 | -7.19361 | 6.31E-13  | 6.84E-12  | 252.6122 | 268.7792 | 251.8548 | 49.10679 | 83.42532 | 27.13445 |
| 17637 | LOC119627 | 3.196534 | -2.33969 | 1.670691 | -1.40043 | 0.161384  | 0.243261  | 8.131296 | 1.642235 | 6.261582 | 0        | 2.139111 | 1.004979 |
| 3493  | ZBTB8B    | 63.38127 | -2.3407  | 0.39922  | -5.86317 | 4.54E-09  | 3.46E-08  | 125.764  | 94.15483 | 96.70666 | 15.62489 | 29.94755 | 18.08963 |
| 8182  | PMP22     | 28.49187 | -2.3496  | 0.701049 | -3.35155 | 0.000804  | 0.002611  | 43.36691 | 55.83601 | 41.74388 | 4.464254 | 23.53022 | 2.009959 |
| 251   | TRIQQ     | 955.1758 | -2.35298 | 0.127601 | -18.4402 | 6.26E-76  | 6.63E-74  | 1523.805 | 1687.671 | 1584.876 | 294.6408 | 314.4493 | 325.6133 |
| 3901  | PPM1E     | 60.43914 | -2.35996 | 0.433675 | -5.44177 | 5.28E-08  | 3.60E-07  | 92.69677 | 115.5039 | 91.83654 | 29.01765 | 23.53022 | 10.04979 |
| 131   | AP152     | 2483.568 | -2.35997 | 0.102292 | -23.0709 | 9.08E-118 | 1.84E-115 | 4004.392 | 4405.023 | 4058.201 | 837.0476 | 812.8621 | 783.884  |
| 1898  | HECW2     | 155.5222 | -2.36337 | 0.288227 | -8.19967 | 2.41E-16  | 3.38E-15  | 246.1072 | 297.792  | 233.7657 | 42.41041 | 74.86887 | 38.18922 |
| 21510 | LOC119627 | 0.800492 | -2.36506 | 2.948452 | -0.80214 | 0.422473  | 0.52215   | 2.168345 | 0.547412 | 2.087194 | 0        | 0        | 0        |
| 381   | MEDAG     | 783.9763 | -2.36575 | 0.147399 | -16.05   | 5.72E-58  | 3.99E-56  | 1314.559 | 1403.016 | 1227.27  | 267.8552 | 211.772  | 279.3843 |
| 2676  | ZNF532    | 115.9594 | -2.36583 | 0.344706 | -6.86333 | 6.73E-12  | 6.68E-11  | 175.0939 | 216.7751 | 185.7603 | 42.41041 | 55.61688 | 20.09959 |
| 21422 | LOC119624 | 0.802267 | -2.36801 | 2.90717  | -0.81454 | 0.415336  | 0.515413  | 1.084173 | 1.642235 | 2.087194 | 0        | 0        | 0        |
| 266   | LIMCH1    | 8645.284 | -2.37036 | 0.131418 | -18.0368 | 1.00E-72  | 1.00E-70  | 13052.9  | 17701.11 | 12714.49 | 2709.802 | 2782.983 | 2910.421 |
| 1824  | GALNT13   | 144.4298 | -2.37047 | 0.282732 | -8.38415 | 5.11E-17  | 7.45E-16  | 232.5551 | 273.7059 | 215.6767 | 60.26743 | 49.19955 | 35.17428 |
| 4472  | TRHDE     | 59.00586 | -2.37075 | 0.471517 | -5.02793 | 4.96E-07  | 2.95E-06  | 86.73382 | 136.853  | 70.26887 | 22.32127 | 27.80844 | 10.04979 |
| 643   | PCOLCE    | 387.2635 | -2.37167 | 0.179699 | -13.198  | 9.01E-40  | 3.72E-38  | 658.6349 | 649.2304 | 646.3344 | 107.1421 | 115.512  | 146.727  |
| 181   | MSRB3     | 2561.055 | -2.37602 | 0.114106 | -20.823  | 2.68E-96  | 3.94E-94  | 4098.173 | 4627.819 | 4147.95  | 904.0114 | 840.6705 | 747.7047 |
| 1515  | CPNE4     | 263.3377 | -2.37687 | 0.258401 | -9.19839 | 3.63E-20  | 3.68E-19  | 374.5817 | 535.3688 | 409.09   | 120.5349 | 79.14709 | 61.30375 |
| 1938  | GABPB2    | 152.4705 | -2.38009 | 0.293051 | -8.12176 | 4.59E-16  | 6.30E-15  | 254.7806 | 270.9688 | 237.9401 | 37.94616 | 77.00798 | 36.17926 |
| 10371 | LOC119627 | 11.82955 | -2.38307 | 0.859999 | -2.77101 | 0.005588  | 0.014325  | 16.80468 | 18.06459 | 24.3506  | 4.464254 | 4.278221 | 3.014938 |
| 5043  | ELMOD1    | 35.43213 | -2.38373 | 0.510953 | -4.66527 | 3.08E-06  | 1.62E-05  | 68.30288 | 56.93083 | 52.17985 | 11.16063 | 14.97377 | 9.044815 |
| 4771  | CFAP58    | 37.47764 | -2.38817 | 0.494425 | -4.8302  | 1.36E-06  | 7.60E-06  | 57.46116 | 74.99542 | 56.35424 | 11.16063 | 12.83466 | 12.05975 |
| 589   | KLF4      | 429.5746 | -2.39153 | 0.174373 | -13.715  | 8.26E-43  | 3.73E-41  | 711.2173 | 731.8896 | 729.1265 | 116.0706 | 128.3466 | 160.7967 |
| 1605  | LOC103246 | 160.9195 | -2.39384 | 0.267025 | -8.96488 | 3.11E-19  | 5.15E-18  | 305.7367 | 229.3656 | 277.5968 | 58.0353  | 38.50399 | 56.27885 |
| 121   | NUAK1     | 4589.072 | -2.39514 | 0.102    | -23.4816 | 6.29E-122 | 1.38E-119 | 7776.229 | 8109.359 | 7259.261 | 1475.436 | 1343.361 | 1570.783 |
| 2643  | PKHD1L1   | 111.773  | -2.40046 | 0.347236 | -6.91305 | 4.74E-12  | 4.77E-11  | 189.1881 | 205.8268 | 164.1926 | 35.71403 | 55.61688 | 20.09959 |
| 16942 | LOC119627 | 3.321235 | -2.40276 | 1.601164 | -1.50063 | 0.133451  | 0.209408  | 7.589209 | 4.926706 | 4.174388 | 2.232127 | 0        | 1.004979 |
| 3976  | TRNAA-UG  | 64.31872 | -2.40389 | 0.445908 | -5.391   | 7.01E-08  | 4.68E-07  | 107.8752 | 71.71095 | 147.4951 | 17.85702 | 12.83466 | 28.13943 |
| 99    | LOC103247 | 9061.588 | -2.4061  | 0.098941 | -24.3185 | 1.25E-130 | 3.36E-128 | 15240.22 | 15918.19 | 14595.75 | 2738.82  | 2703.836 | 3172.72  |
| 120   | CTPS1     | 11152.75 | -2.4084  | 0.102408 | -23.5177 | 2.69E-122 | 5.95E-120 | 18119.24 | 20713.52 | 17485.82 | 3466.493 | 3347.708 | 3783.748 |
| 13462 | LOC119627 | 6.651687 | -2.40869 | 1.138743 | -2.11522 | 0.034411  | 0.067956  | 15.17842 | 9.306001 | 9.044508 | 2.232127 | 2.139111 | 2.009959 |
| 690   | GPR63     | 431.3955 | -2.41138 | 0.187323 | -12.8729 | 6.40E-38  | 2.46E-36  | 739.9479 | 805.2428 | 629.6369 | 127.2312 | 164.7115 | 121.6025 |
| 926   | ERFE      | 288.3085 | -2.41204 | 0.212217 | -11.3659 | 6.18E-30  | 1.77E-28  | 480.8306 | 548.5066 | 427.1791 | 107.142  |          |          |



|       |           |          |          |          |          |           |           |          |          |          |          |          |          |
|-------|-----------|----------|----------|----------|----------|-----------|-----------|----------|----------|----------|----------|----------|----------|
| 228   | ATP11C    | 2048.017 | -2.44223 | 0.128188 | -19.052  | 6.32E-81  | 7.37E-79  | 3326.242 | 3835.715 | 3227.498 | 578.1209 | 598.951  | 721.5753 |
| 1332  | UGT8      | 195.9089 | -2.4429  | 0.25018  | -9.76458 | 1.60E-22  | 3.19E-21  | 298.6896 | 360.197  | 329.0809 | 80.35657 | 59.8951  | 47.23404 |
| 9422  | KCNN2     | 13.6653  | -2.44627 | 0.814728 | -3.00256 | 0.002677  | 0.007554  | 25.47806 | 18.612   | 25.04633 | 6.696381 | 2.139111 | 4.019918 |
| 13116 | TAS2R1    | 6.825958 | -2.45134 | 1.121869 | -2.18505 | 0.028885  | 0.058548  | 9.757555 | 13.6853  | 11.1317  | 2.232127 | 2.139111 | 2.009959 |
| 18804 | LOC119625 | 2.085754 | -2.45546 | 2.017943 | -1.21681 | 0.223675  | 0.316231  | 1.626259 | 6.568942 | 2.087194 | 2.232127 | 0        | 0        |
| 1358  | SLC35G2   | 208.1997 | -2.45814 | 0.253501 | -9.69676 | 3.11E-22  | 6.09E-21  | 377.2921 | 279.7274 | 402.1327 | 49.10679 | 70.59065 | 70.34856 |
| 77    | CAND1     | 7484.53  | -2.46166 | 0.093607 | -26.2979 | 2.03E-152 | 6.99E-150 | 12449.65 | 12449.79 | 12622.65 | 2109.36  | 2314.518 | 2464.21  |
| 17622 | SATL1     | 2.849218 | -2.46238 | 1.757035 | -1.40144 | 0.161082  | 0.24309   | 3.794605 | 7.116354 | 4.174388 | 0        | 0        | 2.009959 |
| 205   | SES2      | 3407.66  | -2.46416 | 0.123046 | -20.0264 | 3.24E-89  | 4.20E-87  | 6178.158 | 5297.852 | 5840.665 | 1111.599 | 877.0354 | 1140.652 |
| 570   | RAPGEF4   | 428.0268 | -2.46672 | 0.177503 | -13.8968 | 6.63E-44  | 3.09E-42  | 723.1432 | 805.7902 | 648.4216 | 122.767  | 128.3466 | 139.6921 |
| 6170  | LOC119625 | 27.62903 | -2.47368 | 0.604897 | -4.08943 | 4.32E-05  | 0.000186  | 61.25576 | 35.03436 | 45.22254 | 8.928508 | 4.278221 | 11.05477 |
| 1106  | HRH4      | 199.1393 | -2.48008 | 0.236018 | -10.508  | 7.93E-26  | 1.91E-24  | 364.282  | 331.7316 | 316.5578 | 49.10679 | 74.86887 | 58.28881 |
| 395   | TRIP6     | 819.1571 | -2.48776 | 0.157983 | -15.747  | 7.20E-56  | 4.84E-54  | 1559.04  | 1159.418 | 1452.687 | 236.6055 | 260.9715 | 246.22   |
| 5226  | LOC103234 | 30.82947 | -2.49325 | 0.545924 | -4.56703 | 4.95E-06  | 2.52E-05  | 54.75072 | 55.28859 | 47.30973 | 11.16063 | 6.417332 | 10.04979 |
| 461   | LRP4      | 580.2776 | -2.4946  | 0.166723 | -14.9626 | 1.29E-50  | 7.43E-49  | 972.5029 | 1084.97  | 901.6679 | 196.4272 | 141.1813 | 184.9162 |
| 918   | ALDH1L2   | 346.6808 | -2.49692 | 0.218933 | -11.4049 | 3.95E-30  | 1.14E-28  | 500.8878 | 725.8681 | 542.6705 | 82.5887  | 115.512  | 112.5577 |
| 249   | PYCR1     | 4482.513 | -2.49703 | 0.134981 | -18.4991 | 2.10E-76  | 2.24E-74  | 8369.814 | 6270.055 | 8215.892 | 1343.74  | 1202.18  | 1493.399 |
| 4487  | LOC119625 | 53.63434 | -2.49762 | 0.497734 | -5.01799 | 5.22E-07  | 3.09E-06  | 75.35001 | 110.5772 | 84.1835  | 17.85702 | 27.80844 | 6.029877 |
| 16025 | LOC119618 | 4.205101 | -2.49846 | 1.503924 | -1.6613  | 0.096654  | 0.160346  | 8.131296 | 4.379295 | 8.348776 | 2.232127 | 2.139111 | 0        |
| 198   | COL12A1   | 4072.225 | -2.50231 | 0.122913 | -20.3584 | 3.92E-92  | 5.26E-90  | 6476.848 | 7750.804 | 6551.702 | 1187.492 | 1086.668 | 1379.837 |
| 2551  | COL1A1    | 135.9858 | -2.504   | 0.355119 | -7.05116 | 1.77E-12  | 1.85E-11  | 230.9288 | 235.9345 | 220.5468 | 55.80317 | 55.61688 | 17.08465 |
| 1743  | CSAR1     | 138.4738 | -2.50742 | 0.291248 | -8.60921 | 7.36E-18  | 1.12E-16  | 215.2083 | 261.1154 | 228.1999 | 31.24978 | 59.8951  | 35.17428 |
| 204   | WASF3     | 1804.969 | -2.5113  | 0.12536  | -20.0328 | 2.85E-89  | 3.72E-87  | 2934.314 | 3376.436 | 2910.94  | 540.1747 | 477.0217 | 590.9279 |
| 709   | KRT2      | 305.5859 | -2.51349 | 0.197108 | -12.7518 | 3.04E-37  | 1.14E-35  | 574.0695 | 491.0284 | 493.9693 | 100.4457 | 85.56443 | 88.43819 |
| 18981 | TRNAS-UG  | 1.857941 | -2.52126 | 2.122533 | -1.18786 | 0.23489   | 0.32899   | 5.420864 | 0.547412 | 4.174388 | 0        | 0        | 1.004979 |
| 2027  | RPL22L1   | 7837.691 | -2.52425 | 0.318736 | -7.91955 | 2.38E-15  | 3.13E-14  | 16588.38 | 7496.805 | 15977.47 | 2337.037 | 2222.536 | 2403.911 |
| 118   | ADGRG6    | 19574.65 | -2.53568 | 0.107143 | -23.6664 | 8.01E-124 | 1.80E-121 | 31757.59 | 37733.64 | 30689.41 | 5439.693 | 5675.061 | 6152.484 |
| 4034  | KRT4      | 42.30277 | -2.53707 | 0.474607 | -5.34563 | 9.01E-08  | 5.94E-07  | 74.26583 | 66.78424 | 74.44326 | 11.16063 | 17.11289 | 10.04979 |
| 105   | ASNS      | 6356.525 | -2.53995 | 0.105451 | -24.0866 | 3.45E-128 | 8.74E-126 | 10756.62 | 11234.53 | 10566.77 | 1816.951 | 1674.924 | 2089.352 |
| 6603  | LOC103241 | 21.63975 | -2.54289 | 0.651856 | -3.90099 | 9.58E-05  | 0.000386  | 32.52518 | 35.03436 | 43.13534 | 6.696381 | 6.417332 | 6.029877 |
| 3250  | LOC103228 | 105.0193 | -2.54633 | 0.417527 | -6.09859 | 1.07E-09  | 8.75E-09  | 152.3263 | 203.0898 | 177.4115 | 40.17829 | 47.06043 | 10.04979 |
| 1097  | BTC       | 217.2264 | -2.54738 | 0.241865 | -10.5322 | 6.14E-26  | 1.49E-24  | 361.0295 | 360.197  | 388.9138 | 49.10679 | 89.84265 | 54.26889 |
| 5682  | RBP4      | 29.00079 | -2.5496  | 0.588033 | -4.33582 | 1.45E-05  | 6.79E-05  | 55.8349  | 54.19377 | 38.26523 | 13.39276 | 4.278221 | 8.039836 |
| 1601  | TMEM45A   | 134.822  | -2.55256 | 0.284298 | -8.97847 | 2.75E-19  | 4.56E-18  | 258.0331 | 193.7838 | 239.3316 | 37.94616 | 40.6431  | 39.1942  |
| 4294  | TRMT9B    | 57.12879 | -2.55311 | 0.494833 | -5.15955 | 2.48E-07  | 1.53E-06  | 106.2489 | 110.5772 | 73.74753 | 8.928508 | 34.22577 | 9.044815 |
| 979   | LOC103218 | 254.0352 | -2.56063 | 0.230702 | -11.0993 | 1.26E-28  | 3.43E-27  | 419.5748 | 504.7137 | 379.8693 | 87.05295 | 55.61688 | 77.38342 |
| 3282  | LRRRC69   | 53.92914 | -2.5647  | 0.423441 | -6.05681 | 1.39E-09  | 1.12E-08  | 95.94929 | 96.89189 | 82.79203 | 15.62489 | 19.252   | 13.06473 |
| 840   | TPD52L1   | 255.0862 | -2.56815 | 0.217156 | -11.8263 | 2.85E-32  | 9.03E-31  | 390.8443 | 466.9423 | 454.3126 | 78.12444 | 59.8951  | 80.39836 |
| 304   | F3        | 1314.999 | -2.56851 | 0.147904 | -17.3661 | 1.49E-67  | 1.30E-65  | 2088.659 | 2631.956 | 2028.057 | 350.4439 | 432.1004 | 358.7777 |
| 15970 | TRNAQ-CU  | 4.481672 | -2.57626 | 1.541891 | -1.67084 | 0.094752  | 0.157733  | 5.420864 | 6.568942 | 10.43597 | 4.464254 | 0        | 0        |
| 2839  | FLI1      | 86.60124 | -2.57642 | 0.388409 | -6.63326 | 3.28E-11  | 3.07E-10  | 143.6529 | 157.1072 | 139.842  | 42.41041 | 23.53022 | 13.06473 |
| 2436  | MYEOV     | 80.29832 | -2.57906 | 0.35737  | -7.21676 | 5.32E-13  | 5.81E-12  | 142.0266 | 127.547  | 140.5377 | 26.78552 | 27.80844 | 17.08465 |
| 18226 | LOC119615 | 1.928006 | -2.57941 | 1.989442 | -1.29655 | 0.194787  | 0.284122  | 3.252518 | 3.831883 | 3.478657 | 0        | 0        | 1.004979 |
| 14147 | RETN      | 6.781928 | -2.58011 | 1.29907  | -1.98612 | 0.04702   | 0.08836   | 13.01007 | 9.853413 | 11.1317  | 6.696381 | 0        | 0        |
| 4782  | MARCHF1C  | 34.70359 | -2.58289 | 0.53557  | -4.82269 | 1.42E-06  | 7.87E-06  | 48.24569 | 66.23683 | 62.61582 | 13.39276 | 10.69555 | 7.034856 |
| 14497 | LOC103230 | 5.229503 | -2.59165 | 1.345913 | -1.92557 | 0.054158  | 0.099317  | 12.46799 | 4.926706 | 9.740239 | 2.232127 | 0        | 2.009959 |
| 20656 | TRNAR-AC  | 0.931748 | -2.59166 | 2.793334 | -0.9278  | 0.353511  | 0.454981  | 3.252518 | 1.642235 | 0.695731 | 0        | 0        | 0        |
| 21362 | LOC119625 | 0.941167 | -2.59595 | 3.156763 | -0.82235 | 0.41088   | 0.51134   | 2.168345 | 0        | 3.478657 | 0        | 0        | 0        |
| 2514  | KISS1     | 82.13285 | -2.59657 | 0.365544 | -7.10331 | 1.22E-12  | 1.29E-11  | 147.4475 | 122.0728 | 150.278  | 31.24978 | 25.66933 | 16.07967 |
| 20694 | LOC119620 | 0.935298 | -2.59672 | 2.812848 | -0.92317 | 0.355921  | 0.457219  | 1.084173 | 3.831883 | 0.695731 | 0        | 0        | 0        |
| 2249  | ZNFS43    | 103.8324 | -2.59847 | 0.346002 | -7.51    | 5.91E-14  | 6.99E-13  | 185.3935 | 199.2579 | 149.5822 | 44.64254 | 14.97377 | 29.1444  |
| 21346 | TRNAW-CC  | 0.944717 | -2.60118 | 3.153059 | -0.82497 | 0.409389  | 0.509866  | 0        | 2.189647 | 3.478657 | 0        | 0        | 0        |
| 2019  | PMFBP1    | 120.6256 | -2.6042  | 0.328047 | -7.93849 | 2.05E-15  | 2.69E-14  | 202.7403 | 213.4906 | 200.3706 | 35.71403 | 51.33866 | 20.09959 |
| 401   | LOC103225 | 1040.54  | -2.60586 | 0.166207 | -15.6784 | 2.13E-55  | 1.41E-53  | 2103.295 | 1436.956 | 1826.991 | 265.6231 | 288.7799 | 321.5934 |
| 4204  | LOC119628 | 48.56256 | -2.61109 | 0.500716 | -5.21472 | 1.84E-07  | 1.16E-06  | 74.80792 | 91.41777 | 84.1835  | 2.232127 | 25.66933 | 13.06473 |
| 2136  | LOC119618 | 105.454  | -2.61359 | 0.338669 | -7.71724 | 1.19E-14  | 1.48E-13  | 212.4979 | 136.3055 | 193.4133 | 29.01765 | 36.36488 | 25.12449 |
| 8896  | INSYN2A   | 14.26108 | -2.61459 | 0.831273 | -3.14529 | 0.001659  | 0.004958  | 19.51511 | 30.10765 | 22.95914 | 6.696381 | 4.278221 | 2.009959 |
| 988   | EHD2      | 221.8253 | -2.6193  | 0.236949 | -11.0543 | 2.09E-28  | 5.63E-27  | 359.9453 | 418.2226 | 368.0419 | 42.41041 | 77.00798 | 65.32367 |
| 20357 | LOC119628 | 0.958243 | -2.62924 | 2.715766 | -0.96814 | 0.332975  | 0.434846  | 2.168345 | 2.189647 | 1.391463 | 0        | 0        | 0        |
| 2764  | LOC103233 | 69.89164 | -2.63123 | 0.38966  | -6.75264 | 1.45E-11  | 1.40E-10  | 110.0435 | 123.7151 | 124.5359 | 22.32127 | 25.66933 | 13.06473 |
| 2488  | KLHDC7B   | 84.73677 | -2.63152 | 0.368165 | -7.14766 | 8.83E-13  | 9.43E-12  | 152.8684 | 148.3486 | 132.8847 | 35.71403 | 23.53022 | 15.07469 |
| 4209  | SLC13A1   | 39.50523 | -2.63677 | 0.506041 | -5.21058 | 1.88E-07  | 1.19E-06  | 76.43418 | 70.06871 | 56.35424 | 11.16063 | 14.97377 | 8.039836 |
| 6182  | CALCB     | 22.93698 | -2.64107 | 0.646772 | -4.08346 | 4.44E-05  | 0.000191  | 40.11439 | 31.74989 | 46.614   | 6.696381 | 6.417332 | 6.029877 |
| 104   | SLC7A5    | 7687.079 | -2.65116 | 0.109677 | -24.1724 | 4.35E-129 | 1.11E-126 | 13458.92 | 12853.78 | 13492.32 | 2020.075 | 1882.417 | 2414.966 |
| 10155 | FBXL21P   | 13.06153 | -2.6515  | 0.938802 | -2.82434 | 0.004738  | 0.012402  | 34.15144 | 16.42235 | 16.00182 | 2.232127 | 8.556443 | 1.004979 |
| 896   | PDE10A    | 339.843  | -2.65213 | 0.230714 | -11.4953 | 1.39E-30  | 4.13E-29  | 602.258  | 618.0279 | 531.5388 | 89.28508 | 132.6249 | 65.32367 |
| 2897  | CLIC6     | 81.24768 | -2.65935 | 0.40584  | -6.5527  | 5.65E-11  | 5.19E-10  | 138.7741 | 140.6848 | 137.0591 | 24.5534  | 36.36488 | 10.04979 |
| 4382  | LOC103233 | 43.36762 | -2.66153 | 0.522672 | -5.09216 | 3.54E-07  | 2.15E-06  | 77.51835 | 93.06001 | 52.17985 | 11.16063 | 19.252   | 7.034856 |
| 8012  | CCDC42    | 15.44104 | -2.66371 | 0.781504 | -3.40844 | 0.000653  | 0.002168  | 26.02015 | 26.82318 | 27.13352 | 2.232127 | 6.417332 | 4.019918 |
| 59    | FGF2      | 4274.34  | -2.66724 | 0.093809 | -28.4326 | 8.00E-178 | 3.60E-175 | 7370.748 | 7537.313 | 7259.261 | 1118.296 | 1127.311 | 1233.11  |
| 14031 | LOC119625 | 5.478833 | -2.67166 | 1.330943 | -2.00734 | 0.044713  | 0.084719  | 7.589209 | 14.78012 | 6.261582 | 2.232127 | 0        | 2.009959 |
| 3517  | TSPYL5    | 52.37513 | -2.67589 | 0.457876 |          |           |           |          |          |          |          |          |          |



|       |           |          |          |          |          |           |           |          |          |          |          |          |          |
|-------|-----------|----------|----------|----------|----------|-----------|-----------|----------|----------|----------|----------|----------|----------|
| 2045  | ALDH3A1   | 90.30176 | -2.68893 | 0.340886 | -7.88805 | 3.07E-15  | 3.99E-14  | 168.0468 | 141.2322 | 157.931  | 24.5534  | 29.94755 | 20.09959 |
| 21022 | TRNAV-AA  | 0.99915  | -2.69326 | 3.070337 | -0.87719 | 0.380385  | 0.481059  | 2.710432 | 3.284471 | 0        | 0        | 0        | 0        |
| 119   | PYGL      | 2704.981 | -2.69713 | 0.114387 | -23.5791 | 6.32E-123 | 1.41E-120 | 4520.458 | 5222.856 | 4316.317 | 712.0485 | 748.6887 | 709.5155 |
| 3904  | LOC119621 | 58.65024 | -2.69806 | 0.49586  | -5.44116 | 5.29E-08  | 3.60E-07  | 110.0435 | 95.24966 | 96.01093 | 15.62489 | 29.94755 | 5.024897 |
| 13487 | DAW1      | 7.087723 | -2.69952 | 1.279785 | -2.10935 | 0.034914  | 0.068822  | 10.29964 | 12.59047 | 13.2189  | 0        | 6.417332 | 0        |
| 5917  | SLC9A2    | 37.27712 | -2.70395 | 0.643416 | -4.20249 | 2.64E-05  | 0.000119  | 54.75072 | 81.01695 | 55.65851 | 6.696381 | 23.53022 | 2.009959 |
| 17587 | TRNAV-CA  | 2.408899 | -2.70681 | 1.929736 | -1.40268 | 0.160711  | 0.242935  | 1.626259 | 7.116354 | 3.478657 | 2.232127 | 0        | 0        |
| 10181 | POPDC3    | 10.33964 | -2.71131 | 0.961643 | -2.81946 | 0.00481   | 0.012561  | 14.63633 | 18.612   | 20.17621 | 4.464254 | 2.139111 | 2.009959 |
| 2571  | RIMS1     | 87.18229 | -2.71672 | 0.386864 | -7.02241 | 2.18E-12  | 2.25E-11  | 132.8112 | 165.8658 | 150.9737 | 35.71403 | 25.66933 | 12.05975 |
| 624   | PRDM1     | 385.0114 | -2.71675 | 0.203655 | -13.34   | 1.35E-40  | 5.77E-39  | 589.79   | 807.4324 | 606.6778 | 107.1421 | 100.5382 | 98.48799 |
| 17650 | LOC103214 | 2.111364 | -2.72241 | 1.949486 | -1.39648 | 0.162571  | 0.244864  | 2.710432 | 5.474118 | 3.478657 | 0        | 0        | 1.004979 |
| 10674 | LOC119621 | 9.657985 | -2.72292 | 1.009042 | -2.69852 | 0.006965  | 0.017347  | 22.76763 | 10.40082 | 17.39328 | 2.232127 | 2.139111 | 3.014938 |
| 20128 | TRNAG-GC  | 1.032402 | -2.72915 | 2.706882 | -1.00823 | 0.313346  | 0.413866  | 2.168345 | 0.547412 | 3.478657 | 0        | 0        | 0        |
| 20130 | LOC119621 | 1.025646 | -2.73007 | 2.709512 | -1.00759 | 0.313653  | 0.41423   | 1.626259 | 3.831883 | 0.695731 | 0        | 0        | 0        |
| 1265  | SLC15A2   | 176.9616 | -2.73545 | 0.2748   | -9.95434 | 2.41E-23  | 5.07E-22  | 342.0565 | 264.9473 | 311.6877 | 46.87467 | 62.03421 | 34.1693  |
| 2874  | KLF8      | 64.89657 | -2.74057 | 0.416415 | -6.58136 | 4.66E-11  | 4.31E-10  | 110.5856 | 119.8832 | 105.0554 | 24.5534  | 19.252   | 10.04979 |
| 11208 | LOC119621 | 9.063802 | -2.75271 | 1.066362 | -2.58141 | 0.00984   | 0.02334   | 12.46799 | 22.44388 | 13.2189  | 2.232127 | 0        | 4.019918 |
| 339   | SOC52     | 476.6087 | -2.75687 | 0.16635  | -16.5728 | 1.10E-61  | 8.60E-60  | 831.5605 | 801.4109 | 860.6197 | 129.4634 | 106.9555 | 129.6424 |
| 10209 | LOC119621 | 12.4089  | -2.76746 | 0.983322 | -2.81439 | 0.004887  | 0.012726  | 25.47806 | 24.08612 | 13.91463 | 6.696381 | 4.278221 | 0        |
| 367   | CUNH8orf1 | 506.4504 | -2.77226 | 0.171231 | -16.1902 | 5.91E-59  | 4.28E-57  | 880.3483 | 879.1434 | 893.3191 | 98.21359 | 154.016  | 133.6623 |
| 1599  | LOC103214 | 108.4759 | -2.77578 | 0.309053 | -8.98156 | 2.67E-19  | 4.44E-18  | 191.8986 | 195.426  | 180.8902 | 24.5534  | 29.94755 | 28.13943 |
| 4969  | TMEM156   | 31.32053 | -2.77635 | 0.590203 | -4.70406 | 2.55E-06  | 1.36E-05  | 47.7036  | 62.95236 | 51.48412 | 8.928508 | 12.83466 | 4.019918 |
| 15062 | LOC119621 | 4.140578 | -2.77755 | 1.523976 | -1.82257 | 0.068369  | 0.120673  | 8.673382 | 8.758589 | 4.174388 | 2.232127 | 0        | 1.004979 |
| 868   | MED12L    | 228.5418 | -2.78467 | 0.238174 | -11.6918 | 1.40E-31  | 4.30E-30  | 389.218  | 442.8562 | 361.0846 | 60.26743 | 70.59065 | 47.23404 |
| 4128  | LOC119621 | 37.41227 | -2.79163 | 0.529557 | -5.27163 | 1.35E-07  | 8.71E-07  | 71.01331 | 65.68942 | 57.7457  | 11.16063 | 12.83466 | 6.029877 |
| 175   | HOMER1    | 1729.768 | -2.79323 | 0.13222  | -21.1256 | 4.63E-99  | 7.03E-97  | 2876.852 | 3453.621 | 2741.182 | 457.586  | 402.1528 | 447.2159 |
| 19722 | LOC119621 | 1.075973 | -2.79421 | 2.622619 | -1.06543 | 0.286682  | 0.386444  | 1.084173 | 3.284471 | 2.087194 | 0        | 0        | 0        |
| 1212  | LOC103231 | 157.5617 | -2.79446 | 0.276163 | -10.1189 | 4.56E-24  | 9.99E-23  | 263.454  | 285.749  | 281.0755 | 40.17829 | 25.66933 | 49.24399 |
| 2075  | LOC103231 | 88.69886 | -2.79464 | 0.356118 | -7.84751 | 4.24E-15  | 5.44E-14  | 131.1849 | 180.6459 | 152.3652 | 20.08914 | 27.80844 | 20.09959 |
| 6802  | CDC42EP5  | 19.19184 | -2.79465 | 0.732252 | -3.81651 | 0.000135  | 0.000529  | 43.909   | 25.72836 | 30.61218 | 4.464254 | 6.417332 | 4.019918 |
| 347   | TBX3      | 578.2845 | -2.79581 | 0.169858 | -16.4597 | 7.15E-61  | 5.47E-59  | 946.4828 | 1144.638 | 943.4117 | 124.9991 | 160.4333 | 149.7419 |
| 126   | ATRNL1    | 1273.551 | -2.81351 | 0.121026 | -23.2472 | 1.52E-119 | 3.20E-117 | 2167.261 | 2322.121 | 2204.773 | 294.6408 | 320.8666 | 331.6432 |
| 3066  | LOC119621 | 68.18238 | -2.81751 | 0.446187 | -6.31465 | 2.71E-10  | 2.35E-09  | 140.4004 | 88.68071 | 126.6231 | 13.39276 | 29.94755 | 10.04979 |
| 5285  | LOC119621 | 32.37257 | -2.82305 | 0.623577 | -4.52719 | 5.98E-06  | 3.01E-05  | 73.18166 | 29.01283 | 68.87741 | 6.696381 | 6.417332 | 10.04979 |
| 5022  | SNAI1     | 34.23272 | -2.82619 | 0.604263 | -4.67708 | 2.91E-06  | 1.54E-05  | 36.31979 | 83.75401 | 58.44144 | 11.16063 | 10.69555 | 5.024897 |
| 311   | LOC103231 | 537.2438 | -2.83177 | 0.164693 | -17.1942 | 2.93E-66  | 2.51E-64  | 876.0116 | 988.6257 | 958.0221 | 129.4634 | 149.7377 | 121.6025 |
| 17064 | LOC103241 | 2.266452 | -2.83466 | 1.908227 | -1.48549 | 0.137413  | 0.214084  | 4.336691 | 5.474118 | 2.782925 | 0        | 0        | 1.004979 |
| 374   | AREG      | 1779.822 | -2.83686 | 0.176161 | -16.1038 | 2.40E-58  | 1.70E-56  | 2639.419 | 4062.89  | 2662.564 | 499.9964 | 400.0137 | 414.0515 |
| 2103  | PKC1      | 89.59456 | -2.84445 | 0.36497  | -7.79365 | 6.51E-15  | 8.23E-14  | 175.636  | 137.9478 | 158.6268 | 11.16063 | 32.08666 | 22.10955 |
| 1145  | SMAD9     | 162.8434 | -2.8468  | 0.275367 | -10.3382 | 4.73E-25  | 1.10E-23  | 254.2385 | 324.6152 | 277.5968 | 51.33892 | 32.08666 | 37.18424 |
| 3370  | CUNH4orf1 | 49.92507 | -2.84749 | 0.476981 | -5.96982 | 2.38E-09  | 1.87E-08  | 80.22878 | 87.03848 | 93.92374 | 8.928508 | 21.39111 | 8.039836 |
| 1477  | ID3       | 162.6144 | -2.84754 | 0.305948 | -9.30728 | 1.31E-20  | 2.36E-19  | 299.2317 | 238.1241 | 314.4706 | 62.49956 | 34.22577 | 27.13445 |
| 16578 | LOC119621 | 2.634597 | -2.86206 | 1.833663 | -1.56085 | 0.11856   | 0.190127  | 5.420864 | 3.284471 | 4.87012  | 2.232127 | 0        | 0        |
| 15513 | LOC119621 | 3.69328  | -2.86342 | 1.644168 | -1.74156 | 0.081585  | 0.139815  | 4.878777 | 10.40082 | 4.87012  | 0        | 0        | 2.009959 |
| 2512  | PWWP3B    | 68.68733 | -2.86394 | 0.402746 | -7.11104 | 1.15E-12  | 1.22E-11  | 121.9694 | 121.5254 | 116.1871 | 17.85702 | 23.53022 | 11.05477 |
| 3283  | HACD1     | 46.40055 | -2.86769 | 0.473511 | -6.05622 | 1.39E-09  | 1.13E-08  | 76.97626 | 86.49107 | 80.70484 | 15.62489 | 8.556443 | 10.04979 |
| 192   | GATM      | 833.3    | -2.86809 | 0.140017 | -20.4839 | 3.00E-93  | 4.15E-91  | 1550.909 | 1442.43  | 1408.16  | 183.0344 | 203.2155 | 212.0507 |
| 644   | MECOM     | 349.8288 | -2.87252 | 0.217719 | -13.1937 | 9.54E-40  | 3.94E-38  | 550.7598 | 700.6871 | 591.3717 | 71.42806 | 113.3729 | 71.35354 |
| 65    | IL11      | 16676.51 | -2.8741  | 0.105389 | -27.2713 | 9.30E-164 | 3.80E-161 | 31750    | 25843.86 | 30461.9  | 4020.061 | 3773.391 | 4209.859 |
| 508   | CHST11    | 373.2869 | -2.87665 | 0.198463 | -14.4946 | 1.31E-47  | 6.86E-46  | 608.763  | 750.5016 | 608.7649 | 100.4457 | 89.84265 | 81.40334 |
| 3439  | LOC103241 | 44.93834 | -2.8788  | 0.486978 | -5.91155 | 3.39E-09  | 2.62E-08  | 81.85504 | 68.97389 | 85.57496 | 15.62489 | 8.556443 | 9.044815 |
| 19366 | LOC119621 | 1.138938 | -2.87943 | 2.558768 | -1.12532 | 0.260455  | 0.357557  | 3.252518 | 2.189647 | 1.391463 | 0        | 0        | 0        |
| 19345 | LOC119611 | 1.139826 | -2.88049 | 2.554349 | -1.12768 | 0.259454  | 0.356569  | 2.710432 | 2.737059 | 1.391463 | 0        | 0        | 0        |
| 125   | LOC103221 | 1278.652 | -2.88268 | 0.1237   | -23.3038 | 4.06E-120 | 8.64E-118 | 2236.106 | 2162.277 | 2351.572 | 310.2657 | 327.2839 | 284.4092 |
| 784   | BEST1     | 211.164  | -2.88328 | 0.236417 | -12.1957 | 3.28E-34  | 1.11E-32  | 376.75   | 372.7874 | 367.3462 | 37.96416 | 59.8951  | 52.25893 |
| 1683  | ERC2      | 101.4327 | -2.8837  | 0.328719 | -8.77256 | 1.75E-18  | 2.76E-17  | 190.2723 | 169.6977 | 173.9328 | 26.78552 | 27.80844 | 20.09959 |
| 171   | TNFRSF19  | 853.0852 | -2.89339 | 0.136464 | -21.2026 | 9.05E-100 | 1.41E-97  | 1509.168 | 1505.382 | 1493.04  | 225.4448 | 192.52   | 192.9561 |
| 515   | SATB1     | 628.3267 | -2.90487 | 0.2018   | -14.3948 | 5.58E-47  | 2.88E-45  | 916.6681 | 1382.762 | 1020.638 | 154.0168 | 173.268  | 122.6075 |
| 855   | SESN3     | 209.0264 | -2.90668 | 0.247456 | -11.7463 | 7.38E-32  | 2.30E-30  | 333.3831 | 403.9899 | 365.259  | 53.57105 | 57.75599 | 40.19918 |
| 5968  | LOC119611 | 27.89419 | -2.90829 | 0.696083 | -4.17809 | 2.94E-05  | 0.000131  | 66.67662 | 22.44388 | 59.13717 | 8.928508 | 2.139111 | 8.039836 |
| 789   | LOC119621 | 207.7947 | -2.91368 | 0.239253 | -12.1782 | 4.06E-34  | 1.37E-32  | 382.713  | 375.5245 | 340.9084 | 44.64254 | 57.75599 | 45.22408 |
| 3304  | MERTK     | 45.88636 | -2.92016 | 0.483827 | -6.03555 | 1.58E-09  | 1.27E-08  | 79.14461 | 90.87036 | 72.35606 | 8.928508 | 14.97377 | 9.044815 |
| 1161  | LOC103221 | 183.7476 | -2.92909 | 0.284658 | -10.2898 | 7.83E-25  | 1.79E-23  | 305.1946 | 379.3564 | 287.3371 | 31.24978 | 64.17332 | 35.17428 |
| 12018 | LOC119621 | 7.434769 | -2.93085 | 1.219514 | -2.40329 | 0.016248  | 0.035943  | 15.17842 | 11.49565 | 13.91463 | 0        | 0        | 4.019918 |
| 7981  | LOC119621 | 14.43735 | -2.93699 | 0.859437 | -3.41734 | 0.000632  | 0.002106  | 29.27266 | 20.25424 | 26.43779 | 2.232127 | 6.417332 | 2.009959 |
| 4134  | LOC119621 | 36.43321 | -2.93867 | 0.557696 | -5.2693  | 1.37E-07  | 8.81E-07  | 69.92914 | 58.02565 | 65.39875 | 2.232127 | 14.97377 | 8.039836 |
| 678   | SLC6A9    | 259.9352 | -2.94507 | 0.227779 | -12.9295 | 3.07E-38  | 1.20E-36  | 479.7464 | 465.3    | 429.962  | 62.49956 | 74.86887 | 47.23404 |
| 7475  | LOC119621 | 16.37581 | -2.94523 | 0.824797 | -3.57086 | 0.000356  | 0.001265  | 27.10432 | 31.74989 | 27.82925 | 0        | 8.556443 | 3.014938 |
| 1379  | CADM3     | 177.5894 | -2.95289 | 0.307021 | -9.61786 | 6.72E-22  | 1.30E-20  | 284.0533 | 353.0806 | 301.2517 | 35.71403 | 66.31243 | 25.12449 |
| 1966  | ANO4      | 99.77452 | -2.95451 | 0.366789 | -8.05508 | 7.94E-16  | 1.07E-14  | 171.8414 | 181.1933 | 172.5414 | 26.78552 | 34.22577 | 12.05975 |
| 3844  | LOC119621 | 39.84712 | -2.95488 | 0.537129 | -5.50126 | 3.77E-08  | 2.61E-07  | 52.58238 | 89.22813 | 70.9646  | 6.696381 | 8.556443 | 11.05477 |
| 6368  | RAB38     | 21.2231  | -2.96423 | 0.741864 | -3.99565 | 6.45E-05  | 0.000269  | 33.60935 | 34.48694 | 44.52681 |          |          |          |



|       |           |          |          |          |          |           |           |          |          |          |          |          |          |
|-------|-----------|----------|----------|----------|----------|-----------|-----------|----------|----------|----------|----------|----------|----------|
| 182   | TANC2     | 1066.724 | -2.99287 | 0.144245 | -20.7485 | 1.26E-95  | 1.85E-93  | 1798.1   | 2101.514 | 1781.072 | 229.9091 | 271.6671 | 218.0805 |
| 79    | CSGALNAC  | 3096.51  | -2.99759 | 0.114848 | -26.1004 | 3.61E-150 | 1.21E-147 | 5496.214 | 5922.996 | 5100.407 | 611.6028 | 710.1847 | 737.6549 |
| 2501  | GPM6A     | 74.92296 | -2.99847 | 0.420313 | -7.13389 | 9.76E-13  | 1.04E-11  | 141.4845 | 130.8314 | 123.1445 | 26.78552 | 19.252   | 8.039836 |
| 3959  | SERPING1  | 38.87281 | -3.01016 | 0.556954 | -5.40467 | 6.49E-08  | 4.36E-07  | 62.33993 | 81.56436 | 61.22436 | 13.39276 | 10.69555 | 4.019918 |
| 8563  | LOC10324  | 13.21914 | -3.01195 | 0.930111 | -3.23827 | 0.001203  | 0.003734  | 21.14137 | 16.42235 | 32.00364 | 4.464254 | 4.278221 | 1.004979 |
| 6276  | LOC11962  | 20.01754 | -3.02487 | 0.748729 | -4.04001 | 5.34E-05  | 0.000226  | 30.35684 | 43.24553 | 32.69937 | 2.232127 | 8.556443 | 3.014938 |
| 6000  | SALL4     | 20.07361 | -3.02945 | 0.72751  | -4.16414 | 3.13E-05  | 0.000138  | 35.7777  | 36.67659 | 34.09084 | 4.464254 | 6.417332 | 3.014938 |
| 1748  | MAP3K15   | 118.5178 | -3.03233 | 0.352856 | -8.59368 | 8.42E-18  | 1.28E-16  | 223.8817 | 204.732  | 199.6749 | 31.24978 | 38.50399 | 13.06473 |
| 5398  | LOC10323  | 26.17198 | -3.03881 | 0.680737 | -4.46401 | 8.04E-06  | 3.96E-05  | 45.53526 | 49.81448 | 43.13534 | 13.39276 | 2.139111 | 3.014938 |
| 335   | RNF182    | 402.3491 | -3.04785 | 0.183171 | -16.6394 | 3.61E-62  | 2.87E-60  | 747.5371 | 674.4114 | 731.9094 | 91.51721 | 81.28621 | 87.43321 |
| 1543  | LRRK1     | 113.2445 | -3.05127 | 0.334824 | -9.11307 | 8.01E-20  | 1.38E-18  | 184.8515 | 208.0165 | 209.4151 | 29.01765 | 32.08666 | 16.07967 |
| 2820  | SLC26A7   | 51.81824 | -3.05216 | 0.458278 | -6.66006 | 2.74E-11  | 2.58E-10  | 85.64965 | 97.98671 | 93.228   | 11.16063 | 12.83466 | 10.04979 |
| 108   | TENM3     | 4551.125 | -3.06221 | 0.127938 | -23.9351 | 1.32E-126 | 3.25E-124 | 7068.806 | 9503.069 | 7820.021 | 979.9037 | 904.8438 | 1030.104 |
| 583   | ZNF704    | 388.0797 | -3.06224 | 0.222004 | -13.7936 | 2.78E-43  | 1.27E-41  | 598.4634 | 848.4883 | 627.5497 | 91.51721 | 94.12087 | 68.3386  |
| 1659  | TMEM158   | 95.08732 | -3.06463 | 0.347433 | -8.82077 | 1.14E-18  | 1.82E-17  | 169.673  | 182.2881 | 157.931  | 24.5534  | 14.97377 | 21.10457 |
| 2366  | LOC10321  | 67.47184 | -3.07807 | 0.420411 | -7.32157 | 2.45E-13  | 2.75E-12  | 119.8011 | 122.0728 | 119.6658 | 6.696381 | 23.53022 | 13.06473 |
| 2270  | F2R       | 73.56429 | -3.08678 | 0.413604 | -7.46314 | 8.45E-14  | 9.89E-13  | 126.8482 | 145.0641 | 120.3615 | 13.39276 | 25.66933 | 10.04979 |
| 468   | ASPHD2    | 298.3251 | -3.08851 | 0.207313 | -14.8979 | 3.40E-50  | 1.93E-48  | 534.4972 | 556.7178 | 512.0583 | 64.73168 | 55.61688 | 66.32864 |
| 5159  | LOC11961  | 26.76282 | -3.09318 | 0.672726 | -4.59798 | 4.27E-06  | 2.20E-05  | 47.16151 | 48.71965 | 46.614   | 2.232127 | 12.83466 | 3.014938 |
| 965   | NTNG2     | 165.8018 | -3.09442 | 0.277686 | -11.1436 | 7.70E-29  | 2.12E-27  | 326.336  | 260.0206 | 301.9474 | 35.71403 | 40.6431  | 30.14938 |
| 557   | ADAM23    | 384.3594 | -3.09616 | 0.219497 | -14.1058 | 3.50E-45  | 1.67E-43  | 618.5205 | 844.109  | 598.329  | 89.28508 | 85.56443 | 70.34856 |
| 9476  | LOC10322  | 10.8903  | -3.09967 | 1.036139 | -2.99156 | 0.002776  | 0.007787  | 23.8518  | 23.53871 | 10.43597 | 2.232127 | 4.278221 | 1.004979 |
| 114   | LRRRC8C   | 1658.251 | -3.10653 | 0.130679 | -23.7722 | 6.48E-125 | 1.51E-122 | 2735.91  | 3326.074 | 2858.064 | 323.6584 | 337.9795 | 367.8225 |
| 631   | LOC10324  | 238.7936 | -3.11276 | 0.234587 | -13.2691 | 3.50E-40  | 1.47E-38  | 445.595  | 435.1924 | 399.3498 | 55.80317 | 55.61688 | 41.20416 |
| 4414  | ANKRD34B  | 34.1507  | -3.11277 | 0.613868 | -5.07074 | 3.96E-07  | 2.39E-06  | 59.08741 | 65.68942 | 56.35424 | 8.928508 | 12.83466 | 2.009959 |
| 43    | THBS1     | 46789.21 | -3.11542 | 0.099095 | -31.4388 | 5.97E-217 | 3.69E-214 | 83560.99 | 88895.85 | 79250.76 | 9428.504 | 8922.231 | 10676.9  |
| 1154  | ELOVL4    | 135.0654 | -3.11547 | 0.302294 | -10.3061 | 6.61E-25  | 1.52E-23  | 230.3867 | 262.7577 | 230.9828 | 26.78552 | 36.36488 | 23.11453 |
| 18216 | FAM124B   | 1.347904 | -3.12095 | 2.40267  | -1.29895 | 0.193961  | 0.283073  | 2.168345 | 3.831883 | 2.087194 | 0        | 0        | 0        |
| 3840  | LOC10323  | 50.47264 | -3.12207 | 0.567028 | -5.50603 | 3.67E-08  | 2.54E-07  | 73.18166 | 99.08154 | 96.01093 | 11.16063 | 21.39111 | 2.009959 |
| 10728 | PLAC1     | 8.109894 | -3.13053 | 1.16577  | -2.68537 | 0.007245  | 0.017954  | 19.51511 | 9.853413 | 13.91463 | 2.232127 | 2.139111 | 1.004979 |
| 1555  | LOC10322  | 200.2364 | -3.13673 | 0.345865 | -9.06923 | 1.20E-19  | 2.05E-18  | 310.0734 | 450.5199 | 311.6877 | 46.87467 | 64.17332 | 18.08963 |
| 524   | RTL1      | 376.4752 | -3.13879 | 0.219317 | -14.3116 | 1.85E-46  | 9.39E-45  | 589.79   | 804.6954 | 633.1155 | 95.98146 | 59.8951  | 75.37346 |
| 155   | LOC11962  | 895.3996 | -3.14172 | 0.143955 | -21.8243 | 1.36E-105 | 2.34E-103 | 1553.077 | 1567.24  | 1698.28  | 194.195  | 196.7982 | 162.8067 |
| 35    | FSTL5     | 4823.927 | -3.14565 | 0.095977 | -32.7751 | 1.33E-235 | 1.01E-232 | 8641.941 | 9071.709 | 8297.988 | 966.511  | 943.3478 | 1022.064 |
| 207   | LOC11961  | 721.5271 | -3.15693 | 0.15857  | -19.9087 | 3.42E-88  | 4.39E-86  | 1361.179 | 1287.513 | 1235.619 | 162.9453 | 158.2942 | 123.6125 |
| 15996 | TRNAI-UAI | 2.837685 | -3.17012 | 1.902413 | -1.66637 | 0.09564   | 0.158952  | 3.794605 | 1.094824 | 11.1317  | 0        | 0        | 1.004979 |
| 189   | LOC10322  | 786.6032 | -3.17161 | 0.154514 | -20.5264 | 1.25E-93  | 1.76E-91  | 1367.684 | 1375.098 | 1497.214 | 167.4095 | 177.5462 | 134.6672 |
| 2180  | SLFN13    | 74.38008 | -3.1731  | 0.414753 | -7.65057 | 2.00E-14  | 2.44E-13  | 123.5957 | 140.1374 | 135.6676 | 11.16063 | 25.66933 | 10.04979 |
| 18021 | LOC11962  | 1.413532 | -3.19173 | 2.382995 | -1.33938 | 0.180447  | 0.2662    | 2.710432 | 4.379295 | 1.391463 | 0        | 0        | 0        |
| 5475  | LOC11962  | 28.77526 | -3.19245 | 0.721494 | -4.42478 | 9.65E-06  | 4.69E-05  | 52.58238 | 48.17224 | 52.17985 | 11.16063 | 8.556443 | 0        |
| 10966 | LOC11962  | 7.580793 | -3.19496 | 1.211993 | -2.63612 | 0.008386  | 0.02033   | 15.7205  | 15.87494 | 9.740239 | 0        | 2.139111 | 2.009959 |
| 98    | XYLT1     | 1327.642 | -3.20142 | 0.131097 | -24.4202 | 1.04E-131 | 2.83E-129 | 2289.773 | 2606.228 | 2288.956 | 279.0159 | 239.5804 | 262.2996 |
| 3256  | SLITRK6   | 55.70753 | -3.20314 | 0.526058 | -6.08894 | 1.14E-09  | 9.28E-09  | 94.32303 | 125.3573 | 79.31338 | 6.696381 | 23.53022 | 5.024897 |
| 1900  | LOC11962  | 112.9223 | -3.20608 | 0.391181 | -8.1959  | 2.49E-16  | 3.48E-15  | 237.4338 | 140.6848 | 231.6785 | 37.94616 | 10.69555 | 19.09461 |
| 14942 | LOC10322  | 3.228583 | -3.21512 | 1.740739 | -1.84699 | 0.064749  | 0.115205  | 8.131296 | 4.926706 | 4.174388 | 0        | 2.139111 | 0        |
| 168   | LCN2      | 5412.666 | -3.21801 | 0.151096 | -21.2978 | 1.19E-100 | 1.88E-98  | 8231.582 | 12239.58 | 8846.224 | 1142.849 | 1078.112 | 937.6458 |
| 6548  | DRD5      | 17.10435 | -3.22193 | 0.821845 | -3.92036 | 8.84E-05  | 0.000359  | 31.44101 | 33.39212 | 27.13352 | 2.232127 | 6.417332 | 2.009959 |
| 1385  | NRIP3     | 105.6001 | -3.23341 | 0.336839 | -9.59926 | 8.05E-22  | 1.55E-20  | 177.8043 | 191.5941 | 203.8493 | 17.85702 | 21.39111 | 21.10457 |
| 1372  | LOC11962  | 117.6626 | -3.23488 | 0.335343 | -9.64646 | 5.09E-22  | 9.86E-21  | 218.4608 | 214.038  | 201.7621 | 24.5534  | 32.08666 | 15.07469 |
| 1946  | STK33     | 125.95   | -3.24197 | 0.400026 | -8.10441 | 5.30E-16  | 7.24E-15  | 239.6022 | 246.3353 | 189.2389 | 31.24978 | 38.50399 | 8.039836 |
| 1507  | TRPC5OS   | 123.4693 | -3.24425 | 0.351251 | -9.23627 | 2.55E-20  | 4.50E-19  | 190.8144 | 283.5593 | 192.7176 | 24.5534  | 32.08666 | 17.08465 |
| 730   | DNAH11    | 399.9663 | -3.25267 | 0.25802  | -12.6063 | 1.95E-36  | 7.10E-35  | 672.1871 | 797.0316 | 692.9484 | 93.74933 | 102.6773 | 41.20416 |
| 17541 | LOC11962  | 1.488579 | -3.26097 | 2.313382 | -1.40961 | 0.158654  | 0.240455  | 2.168345 | 3.284471 | 3.478657 | 0        | 0        | 0        |
| 71    | VGLL3     | 4815.804 | -3.26545 | 0.122486 | -26.6597 | 1.38E-156 | 5.17E-154 | 8084.676 | 10116.72 | 7977.256 | 850.4404 | 906.9829 | 958.7504 |
| 1127  | LOC10324  | 142.2561 | -3.26582 | 0.313791 | -10.4076 | 2.29E-25  | 5.40E-24  | 266.1644 | 270.9688 | 233.7657 | 42.41041 | 17.11289 | 23.11453 |
| 1005  | KRT79     | 165.2669 | -3.26869 | 0.297956 | -10.9704 | 5.30E-28  | 1.40E-26  | 282.9691 | 300.5291 | 309.6005 | 33.4819  | 44.92132 | 20.09959 |
| 5150  | CCND2     | 174.6265 | -3.27515 | 0.711537 | -4.60293 | 4.17E-06  | 2.15E-05  | 268.3328 | 389.2098 | 290.12   | 29.01765 | 62.03421 | 9.044815 |
| 262   | RUNX1T1   | 1313.442 | -3.2863  | 0.181336 | -18.1227 | 2.11E-73  | 2.14E-71  | 1968.316 | 3043.062 | 2137.287 | 209.8199 | 275.9453 | 246.22   |
| 1618  | LOC10323  | 106.0568 | -3.29102 | 0.368428 | -8.93259 | 4.16E-19  | 6.84E-18  | 210.3295 | 186.6674 | 176.02   | 22.32127 | 29.94755 | 11.05477 |
| 1629  | ZNF502    | 119.3535 | -3.29424 | 0.37004  | -8.90238 | 5.47E-19  | 8.92E-18  | 230.3867 | 193.2364 | 221.9383 | 17.85702 | 40.6431  | 12.05975 |
| 80    | INHBA     | 13612.64 | -3.30691 | 0.127835 | -25.8686 | 1.50E-147 | 5.00E-145 | 22520.98 | 29916.6  | 21746.48 | 2446.411 | 2436.447 | 2608.927 |
| 12331 | LOC11962  | 5.746685 | -3.31466 | 1.41748  | -2.33842 | 0.019366  | 0.041751  | 10.84173 | 14.23271 | 6.261582 | 0        | 2.139111 | 1.004979 |
| 5803  | FOXQ1     | 22.98844 | -3.33139 | 0.779782 | -4.27221 | 1.94E-05  | 8.87E-05  | 39.5723  | 49.26706 | 34.78657 | 11.16063 | 2.139111 | 1.004979 |
| 938   | BMPRI1B   | 170.9606 | -3.33345 | 0.295489 | -11.2811 | 1.63E-29  | 4.61E-28  | 287.8479 | 348.1539 | 292.2072 | 37.94616 | 38.50399 | 21.10457 |
| 11657 | TMEFF2    | 6.704025 | -3.3353  | 1.345174 | -2.47946 | 0.013158  | 0.030009  | 10.84173 | 10.40082 | 14.61036 | 2.232127 | 2.139111 | 0        |
| 7134  | FABP3     | 14.21941 | -3.34136 | 0.906738 | -3.68504 | 0.000229  | 0.000852  | 27.6464  | 30.10765 | 20.17621 | 2.232127 | 2.139111 | 3.014938 |
| 3626  | LOC11962  | 41.09864 | -3.35398 | 0.586924 | -5.71451 | 1.10E-08  | 8.07E-08  | 94.86511 | 62.40495 | 65.39875 | 15.62489 | 4.278221 | 4.019918 |
| 793   | RPS6KA2   | 194.9131 | -3.35808 | 0.2767   | -12.1362 | 6.79E-34  | 2.28E-32  | 364.282  | 367.3133 | 328.3852 | 46.87467 | 38.50399 | 24.11951 |
| 62    | MYO10     | 5743.027 | -3.3719  | 0.121906 | -27.6598 | 2.13E-168 | 9.12E-166 | 9860.551 | 11878.84 | 9695.017 | 921.8684 | 973.2954 | 1128.592 |
| 1936  | CDO1      | 72.18194 | -3.38085 | 0.416094 | -8.12521 | 4.47E-16  | 6.13E-15  | 146.9054 | 125.3573 | 122.4487 | 15.62489 | 10.69555 | 12.05975 |
| 16959 | LOC10322  | 1.620722 | -3.38786 | 2.261714 | -1.49792 | 0.134155  | 0.210301  | 2.710432 | 4.926706 | 2.087    |          |          |          |



|       |           |          |          |          |          |           |           |          |          |          |          |          |          |
|-------|-----------|----------|----------|----------|----------|-----------|-----------|----------|----------|----------|----------|----------|----------|
| 3664  | CITED4    | 36.07683 | -3.45512 | 0.607852 | -5.68415 | 1.31E-08  | 9.54E-08  | 48.78777 | 78.8273  | 69.57314 | 6.696381 | 8.556443 | 4.019918 |
| 247   | B4GALT6   | 524.234  | -3.46266 | 0.186645 | -18.5521 | 7.84E-77  | 8.43E-75  | 892.8163 | 1090.444 | 898.1892 | 95.98146 | 85.56443 | 82.40832 |
| 16403 | LOC119615 | 1.734015 | -3.48424 | 2.194173 | -1.58795 | 0.112297  | 0.181993  | 4.336691 | 3.284471 | 2.782925 | 0        | 0        | 0        |
| 3936  | LOC119615 | 30.43212 | -3.49642 | 0.645618 | -5.41562 | 6.11E-08  | 4.13E-07  | 58.00324 | 54.19377 | 54.26705 | 6.696381 | 6.417332 | 3.014938 |
| 13466 | SMIM10    | 3.860462 | -3.50194 | 1.656558 | -2.11399 | 0.034516  | 0.068143  | 6.505036 | 5.474118 | 9.044508 | 0        | 2.139111 | 0        |
| 1800  | LOC119620 | 77.30933 | -3.50945 | 0.415394 | -8.44847 | 2.95E-17  | 4.36E-16  | 136.6058 | 152.7279 | 134.9719 | 13.39276 | 17.11289 | 9.044815 |
| 3703  | FST       | 40.8503  | -3.51002 | 0.622698 | -5.6368  | 1.73E-08  | 1.24E-07  | 88.36008 | 67.87906 | 66.09448 | 8.928508 | 12.83466 | 1.004979 |
| 2857  | EXO5      | 47.64289 | -3.51512 | 0.53241  | -6.60229 | 4.05E-11  | 3.77E-10  | 101.3702 | 79.92212 | 80.00911 | 6.696381 | 12.83466 | 5.024897 |
| 1083  | LOC103215 | 130.0321 | -3.51953 | 0.333145 | -10.5646 | 4.35E-26  | 1.07E-24  | 239.0601 | 236.4819 | 237.9401 | 31.24978 | 21.39111 | 14.06971 |
| 3292  | TMEM200   | 41.17794 | -3.54565 | 0.5861   | -6.04957 | 1.45E-09  | 1.17E-08  | 68.30288 | 91.41777 | 66.79021 | 13.39276 | 2.139111 | 5.024897 |
| 1104  | GPR85     | 124.8949 | -3.55377 | 0.338106 | -10.5108 | 7.70E-26  | 1.85E-24  | 219.545  | 246.3353 | 221.2426 | 26.78552 | 21.39111 | 14.06971 |
| 225   | FHL1      | 507.9066 | -3.5553  | 0.18562  | -19.1536 | 9.03E-82  | 1.07E-79  | 890.1058 | 1022.565 | 895.4063 | 91.51721 | 68.45154 | 79.39338 |
| 2253  | LOC119621 | 57.62978 | -3.5584  | 0.474284 | -7.50268 | 6.25E-14  | 7.38E-13  | 108.9594 | 98.53413 | 110.6213 | 8.928508 | 10.69555 | 8.039836 |
| 458   | LOC103235 | 278.1171 | -3.56053 | 0.237658 | -14.9818 | 9.66E-51  | 5.61E-49  | 469.9889 | 579.1617 | 489.0992 | 40.17829 | 47.06043 | 43.21412 |
| 15981 | TRNAN-GL  | 1.84997  | -3.57651 | 2.143418 | -1.6686  | 0.095197  | 0.158363  | 4.336691 | 3.284471 | 3.478657 | 0        | 0        | 0        |
| 473   | GCA       | 280.509  | -3.58934 | 0.241354 | -14.8717 | 5.03E-50  | 2.83E-48  | 559.4331 | 463.6578 | 526.6686 | 44.64254 | 53.47777 | 35.17428 |
| 448   | L3MBTL4   | 316.5844 | -3.59123 | 0.237493 | -15.1214 | 1.17E-51  | 6.94E-50  | 578.4062 | 599.9633 | 567.7168 | 62.49956 | 57.75599 | 33.16432 |
| 1968  | ANGPT1    | 68.22013 | -3.60456 | 0.447671 | -8.0518  | 8.16E-16  | 1.10E-14  | 133.8953 | 136.3055 | 108.5341 | 6.696381 | 12.83466 | 11.05477 |
| 1700  | LOC103245 | 87.33909 | -3.60684 | 0.413083 | -8.73152 | 2.51E-18  | 3.93E-17  | 157.7471 | 171.8873 | 151.6694 | 11.16063 | 23.53022 | 8.039836 |
| 15860 | TRNAK-CU  | 1.90296  | -3.6144  | 2.139864 | -1.68908 | 0.091204  | 0.152859  | 2.168345 | 4.379295 | 4.87012  | 0        | 0        | 0        |
| 5538  | CUNH2orf1 | 22.07617 | -3.62928 | 0.825439 | -4.39679 | 1.10E-05  | 5.27E-05  | 28.18849 | 54.74118 | 38.96096 | 0        | 8.556443 | 2.009959 |
| 12776 | LOC103236 | 4.188804 | -3.63062 | 1.618117 | -2.24373 | 0.024849  | 0.051708  | 8.131296 | 7.116354 | 7.653045 | 2.232127 | 0        | 0        |
| 409   | GDNF      | 352.0399 | -3.63179 | 0.233265 | -15.5694 | 1.18E-54  | 7.64E-53  | 594.1267 | 789.3678 | 571.8912 | 49.10679 | 53.47777 | 54.26889 |
| 47    | GRB10     | 1903.848 | -3.63517 | 0.119455 | -30.4312 | 2.12E-203 | 1.20E-200 | 3592.406 | 3524.237 | 3455.002 | 254.4625 | 316.5884 | 280.3893 |
| 279   | ZDHHC2    | 414.9223 | -3.63951 | 0.203617 | -17.8743 | 1.87E-71  | 1.78E-69  | 770.3047 | 829.3289 | 708.9503 | 60.26743 | 51.33866 | 69.34358 |
| 1296  | EPHA4     | 133.5918 | -3.64219 | 0.368985 | -9.87083 | 5.57E-23  | 1.14E-21  | 234.7234 | 276.443  | 226.1127 | 17.85702 | 36.36488 | 10.04979 |
| 786   | IQGAP2    | 211.1059 | -3.68734 | 0.302422 | -12.1927 | 3.40E-34  | 1.15E-32  | 362.1137 | 473.5112 | 334.6468 | 33.4819  | 42.78221 | 20.09959 |
| 208   | ATP2B3    | 843.056  | -3.70307 | 0.186106 | -19.8976 | 4.27E-88  | 5.46E-86  | 1450.623 | 1696.429 | 1538.958 | 136.1597 | 149.7377 | 86.42823 |
| 272   | ELOVL7    | 414.6376 | -3.7098  | 0.206444 | -17.97   | 3.35E-72  | 3.27E-70  | 796.867  | 812.9065 | 704.0801 | 64.73168 | 44.92132 | 64.31869 |
| 5592  | CCDC85A   | 21.11679 | -3.71049 | 0.84784  | -4.37641 | 1.21E-05  | 5.73E-05  | 39.03022 | 42.69812 | 34.09084 | 4.464254 | 6.417332 | 0        |
| 274   | FUT1      | 568.6162 | -3.71411 | 0.207174 | -17.9275 | 7.20E-72  | 6.98E-70  | 1234.331 | 845.7513 | 1086.732 | 84.82083 | 87.70354 | 72.35852 |
| 21    | ALPK2     | 14435.6  | -3.71735 | 0.099116 | -37.505  | 7.63E-308 | 9.66E-305 | 25791.39 | 29391.64 | 25319.06 | 2011.146 | 1948.73  | 2151.661 |
| 12358 | TRNAP-AG  | 4.443456 | -3.73109 | 1.600991 | -2.33049 | 0.01978   | 0.042552  | 10.29964 | 6.568942 | 7.653045 | 0        | 2.139111 | 0        |
| 765   | ADORA2B   | 159.1097 | -3.75283 | 0.302664 | -12.3993 | 2.63E-35  | 9.16E-34  | 302.4842 | 288.486  | 297.773  | 24.5534  | 19.252   | 22.10955 |
| 5610  | LOC103215 | 20.90878 | -3.7642  | 0.861776 | -4.36796 | 1.25E-05  | 5.94E-05  | 33.60935 | 44.34036 | 37.56949 | 8.928508 | 0        | 1.004979 |
| 5315  | SPINK2    | 20.72611 | -3.77005 | 0.835771 | -4.51087 | 6.46E-06  | 3.23E-05  | 44.99317 | 30.65506 | 38.96096 | 4.464254 | 4.278221 | 1.004979 |
| 179   | RORA      | 794.9497 | -3.77336 | 0.180494 | -20.9058 | 4.75E-97  | 7.05E-95  | 1363.347 | 1666.869 | 1408.856 | 95.98146 | 141.1813 | 93.46309 |
| 2639  | G0S2      | 48.51232 | -3.77956 | 0.546296 | -6.91852 | 4.56E-12  | 4.60E-11  | 88.90216 | 93.60742 | 86.96642 | 11.16063 | 6.417332 | 4.019918 |
| 769   | PRR16     | 199.0651 | -3.78982 | 0.307424 | -12.3277 | 6.43E-35  | 2.22E-33  | 320.373  | 471.3216 | 323.5151 | 20.08914 | 29.94755 | 29.1444  |
| 10517 | LOC103246 | 6.990033 | -3.79431 | 1.38449  | -2.74059 | 0.006133  | 0.015504  | 11.38381 | 15.32753 | 13.2189  | 0        | 0        | 2.009959 |
| 444   | FLT1      | 398.7189 | -3.79871 | 0.250591 | -15.159  | 6.61E-52  | 3.96E-50  | 686.2813 | 876.4063 | 661.6405 | 55.80317 | 77.00798 | 35.17428 |
| 1070  | TGFB1     | 115.5769 | -3.8033  | 0.357129 | -10.6496 | 1.75E-26  | 4.35E-25  | 221.7133 | 217.8699 | 205.9365 | 15.62489 | 19.252   | 13.06473 |
| 86    | DDR2      | 1555.851 | -3.80426 | 0.149899 | -25.3789 | 4.32E-142 | 1.33E-139 | 2715.853 | 3314.579 | 2673     | 218.7484 | 231.024  | 181.9013 |
| 15293 | TRNAP-AG  | 2.182203 | -3.817   | 2.143934 | -1.78037 | 0.075015  | 0.130404  | 9.215468 | 1.094824 | 2.782925 | 0        | 0        | 0        |
| 14847 | LOC119620 | 2.19606  | -3.8214  | 2.051577 | -1.86267 | 0.062509  | 0.111929  | 5.420864 | 2.189647 | 5.565851 | 0        | 0        | 0        |
| 14806 | LOC119621 | 2.190191 | -3.82237 | 2.04246  | -1.87145 | 0.061282  | 0.110036  | 4.336691 | 6.02153  | 2.782925 | 0        | 0        | 0        |
| 831   | TRPM5     | 173.5293 | -3.83202 | 0.322815 | -11.8706 | 1.68E-32  | 5.38E-31  | 342.0565 | 263.8525 | 363.8675 | 20.08914 | 34.22577 | 17.08465 |
| 2016  | FGF21     | 68.57123 | -3.83339 | 0.482581 | -7.94351 | 1.97E-15  | 2.59E-14  | 114.9223 | 131.3788 | 134.9719 | 11.16063 | 14.97377 | 4.019918 |
| 1158  | IHO1      | 189.417  | -3.8462  | 0.373662 | -10.2933 | 7.56E-25  | 1.73E-23  | 374.5817 | 350.891  | 329.7767 | 35.71403 | 38.50399 | 7.034856 |
| 66    | PID1      | 1730.097 | -3.85266 | 0.141516 | -27.2243 | 3.35E-163 | 1.35E-160 | 3035.684 | 3672.038 | 3003.472 | 198.6593 | 239.5804 | 231.1453 |
| 1037  | SPINK5    | 163.4825 | -3.85736 | 0.356435 | -10.8221 | 2.71E-27  | 6.94E-26  | 269.4169 | 390.852  | 253.2462 | 20.08914 | 34.22577 | 13.06473 |
| 129   | STK26     | 725.2099 | -3.8584  | 0.167214 | -23.0747 | 8.31E-118 | 1.71E-115 | 1417.556 | 1271.09  | 1378.94  | 89.28508 | 106.9555 | 87.43321 |
| 217   | ITGA4     | 518.6389 | -3.86097 | 0.198122 | -19.4878 | 1.39E-84  | 1.71E-82  | 952.4458 | 1093.181 | 868.2728 | 60.26743 | 66.31243 | 71.35354 |
| 3465  | MAL       | 43.20466 | -3.88284 | 0.658928 | -5.89266 | 3.80E-09  | 2.92E-08  | 63.96619 | 86.49107 | 89.05362 | 11.16063 | 8.556443 | 0        |
| 1431  | LOC103236 | 89.19006 | -3.88288 | 0.411461 | -9.43682 | 3.84E-21  | 7.14E-20  | 174.0097 | 151.6331 | 176.7158 | 11.16063 | 8.556443 | 13.06473 |
| 31    | PMEP1A1   | 3293.407 | -3.88418 | 0.116085 | -33.4598 | 1.85E-245 | 1.59E-242 | 5935.304 | 6784.622 | 5791.268 | 41.42454 | 402.1528 | 434.1511 |
| 5971  | LOC119615 | 16.62054 | -3.88617 | 0.930516 | -4.17635 | 2.96E-05  | 0.000132  | 31.9831  | 25.18094 | 36.17803 | 2.232127 | 2.139111 | 2.009959 |
| 464   | FLT3      | 284.049  | -3.88899 | 0.260528 | -14.9273 | 2.19E-50  | 1.25E-48  | 514.9821 | 591.2048 | 484.9248 | 35.71403 | 51.33866 | 26.12947 |
| 935   | JAM2      | 131.6407 | -3.91524 | 0.346714 | -11.2924 | 1.43E-29  | 4.07E-28  | 236.8917 | 274.8007 | 228.1999 | 15.62489 | 19.252   | 15.07469 |
| 822   | PLEKHG1   | 187.4674 | -3.92796 | 0.329518 | -11.9203 | 9.28E-33  | 3.00E-31  | 329.5885 | 399.6106 | 322.1236 | 15.62489 | 42.78221 | 15.07469 |
| 26    | LOC103221 | 2814.208 | -3.93072 | 0.112011 | -35.0923 | 8.85E-270 | 9.05E-267 | 5369.908 | 5167.568 | 5311.213 | 372.7652 | 308.0319 | 355.7627 |
| 2333  | RAB20     | 57.37143 | -3.9379  | 0.534887 | -7.36211 | 1.81E-13  | 2.06E-12  | 107.3331 | 93.60742 | 121.0573 | 2.232127 | 14.97377 | 5.024897 |
| 11384 | LOC119620 | 5.103273 | -3.9507  | 1.554628 | -2.54125 | 0.011046  | 0.025795  | 12.46799 | 7.663765 | 8.348776 | 0        | 2.139111 | 0        |
| 406   | ROR2      | 315.1973 | -3.96857 | 0.254284 | -15.6068 | 6.54E-55  | 4.28E-53  | 601.7159 | 580.2565 | 588.5887 | 60.26743 | 34.22577 | 26.12947 |
| 2924  | LOC103235 | 47.59551 | -3.97057 | 0.609055 | -6.51923 | 7.07E-11  | 6.43E-10  | 110.0435 | 74.44801 | 81.40057 | 13.39276 | 4.278221 | 2.009959 |
| 2262  | LOC119621 | 55.00584 | -3.98076 | 0.531929 | -7.48364 | 7.23E-14  | 8.50E-13  | 102.4543 | 99.62895 | 106.4469 | 8.928508 | 8.556443 | 4.019918 |
| 717   | CACNA2D1  | 295.5901 | -3.9812  | 0.314166 | -12.6723 | 8.42E-37  | 3.12E-35  | 532.3288 | 601.6056 | 525.2772 | 44.64254 | 55.61688 | 14.06971 |
| 3652  | C1QTNF3   | 33.76082 | -3.98768 | 0.699958 | -5.69703 | 1.22E-08  | 8.87E-08  | 74.80792 | 60.76271 | 52.87558 | 6.696381 | 6.417332 | 1.004979 |
| 363   | TMTC1     | 300.1541 | -3.99352 | 0.246154 | -16.2237 | 3.43E-59  | 2.51E-57  | 572.4432 | 590.1099 | 527.3644 | 37.94616 | 44.92132 | 28.13943 |
| 1710  | LOC119621 | 80.89875 | -3.99383 | 0.459091 | -8.69944 | 3.34E-18  | 5.19E-17  | 150.1579 | 151.0857 | 151.6694 | 15.62489 | 12.83466 | 4.019918 |
| 3067  | LOC103221 | 38.7582  | -4.00154 | 0.633869 | -6.31288 | 2.74E-10  | 2.37E-09  | 63.96619 | 71.16354 | 84.87923 | 2.232127 | 4.278221 | 6.029877 |
| 193   | DAB1      | 1048.727 | -4.01185 | 0.195878 | -20.4813 | 3.1       |           |          |          |          |          |          |          |



|       |           |          |          |          |          |           |           |          |          |          |          |          |          |
|-------|-----------|----------|----------|----------|----------|-----------|-----------|----------|----------|----------|----------|----------|----------|
| 333   | MYCL      | 295.3039 | -4.06884 | 0.243493 | -16.7103 | 1.10E-62  | 8.81E-61  | 576.7799 | 540.8429 | 553.1064 | 35.71403 | 34.22577 | 31.15436 |
| 1445  | CDH11     | 93.48283 | -4.07673 | 0.434324 | -9.38639 | 6.21E-21  | 1.14E-19  | 169.673  | 198.7105 | 157.931  | 17.85702 | 10.69555 | 6.029877 |
| 1948  | ADGRL4    | 78.05911 | -4.07804 | 0.503453 | -8.10014 | 5.49E-16  | 7.49E-15  | 132.2691 | 171.3399 | 134.2762 | 15.62489 | 12.83466 | 2.009959 |
| 723   | WIPF1     | 252.2941 | -4.0859  | 0.323163 | -12.6435 | 1.22E-36  | 4.47E-35  | 414.154  | 543.5799 | 464.7486 | 29.01765 | 49.19955 | 13.06473 |
| 183   | BGN       | 484.2971 | -4.08972 | 0.197347 | -20.7235 | 2.13E-95  | 3.09E-93  | 893.3583 | 931.6949 | 920.4526 | 55.80317 | 49.19955 | 55.27387 |
| 1132  | SH3GL3    | 108.5459 | -4.09198 | 0.393925 | -10.3877 | 2.82E-25  | 6.62E-24  | 187.5619 | 231.5552 | 196.1962 | 8.928508 | 14.97377 | 12.05975 |
| 992   | HTR7      | 148.5866 | -4.10521 | 0.372929 | -11.008  | 3.50E-28  | 9.37E-27  | 266.1644 | 285.749  | 285.2499 | 33.4819  | 12.83466 | 8.039836 |
| 807   | HOXB9     | 234.1578 | -4.11037 | 0.341294 | -12.0435 | 2.10E-33  | 6.91E-32  | 343.1407 | 605.4375 | 374.9992 | 26.78552 | 38.50399 | 16.07967 |
| 909   | APBA2     | 172.4903 | -4.11617 | 0.360236 | -11.4263 | 3.09E-30  | 9.03E-29  | 361.5716 | 272.6111 | 338.1254 | 26.78552 | 27.80844 | 8.039836 |
| 2307  | LOC119618 | 54.85967 | -4.12269 | 0.556652 | -7.40622 | 1.30E-13  | 1.50E-12  | 93.23886 | 124.8099 | 91.83654 | 6.696381 | 8.556443 | 4.019918 |
| 2947  | MFAP2     | 220.6289 | -4.12902 | 0.636118 | -6.49096 | 8.53E-11  | 7.69E-10  | 508.477  | 244.6931 | 496.7522 | 42.41041 | 21.39111 | 10.04979 |
| 645   | CMBL      | 261.5893 | -4.13255 | 0.313658 | -13.1753 | 1.22E-39  | 5.02E-38  | 511.1874 | 469.1319 | 496.0565 | 46.87467 | 34.22577 | 12.05975 |
| 8152  | CNNB3     | 91.00079 | -4.13774 | 1.229888 | -3.36433 | 0.000767  | 0.002502  | 153.4104 | 211.301  | 150.9737 | 8.928508 | 21.39111 | 0        |
| 1224  | ST8SIA1   | 102.1748 | -4.1407  | 0.410469 | -10.0877 | 6.26E-24  | 1.36E-22  | 190.8144 | 208.0165 | 181.5859 | 4.464254 | 17.11289 | 11.05477 |
| 800   | HMX3      | 158.9262 | -4.14114 | 0.342866 | -12.078  | 1.38E-33  | 4.59E-32  | 316.0364 | 280.2748 | 301.2517 | 24.5534  | 21.39111 | 10.04979 |
| 3673  | KRT73     | 31.698   | -4.14899 | 0.730831 | -5.67708 | 1.37E-08  | 9.92E-08  | 62.88202 | 59.66789 | 55.65851 | 6.696381 | 4.278221 | 1.004979 |
| 1905  | FIBIN     | 63.88608 | -4.15673 | 0.507677 | -8.18774 | 2.66E-16  | 3.71E-15  | 114.3802 | 116.5987 | 132.189  | 6.696381 | 6.417332 | 7.034856 |
| 317   | NTM       | 505.0756 | -4.17058 | 0.244808 | -17.0361 | 4.43E-65  | 3.72E-63  | 894.4425 | 1052.673 | 913.4953 | 66.96381 | 72.72976 | 30.14938 |
| 10491 | LOC119618 | 5.871401 | -4.17166 | 1.518747 | -2.74678 | 0.006018  | 0.015251  | 14.63633 | 11.49565 | 6.957314 | 0        | 2.139111 | 0        |
| 144   | KCNG1     | 602.8622 | -4.17558 | 0.186002 | -22.4491 | 1.31E-111 | 2.41E-109 | 1153.56  | 1136.974 | 1134.738 | 78.12444 | 53.47777 | 60.29877 |
| 815   | CSRP2     | 147.6222 | -4.18088 | 0.348709 | -11.9896 | 4.03E-33  | 1.31E-31  | 277.5482 | 310.3825 | 249.7676 | 17.85702 | 17.11289 | 13.06473 |
| 479   | NFATC4    | 307.8035 | -4.18127 | 0.282021 | -14.8261 | 9.93E-50  | 5.51E-48  | 608.763  | 515.1145 | 621.9838 | 20.08914 | 57.75599 | 23.11453 |
| 1     | PHGDH     | 6288.725 | -4.18785 | 0.094605 | -44.2667 | 0         | 0         | 12111.29 | 11884.86 | 11778.04 | 618.2992 | 669.5416 | 670.3213 |
| 147   | CEACAM2C  | 949.7027 | -4.18935 | 0.188059 | -22.2767 | 6.21E-110 | 1.12E-107 | 1773.707 | 1986.01  | 1632.882 | 138.3919 | 89.84265 | 77.38342 |
| 4     | PSAT1     | 13260.8  | -4.2228  | 0.087712 | -48.1441 | 0         | 0         | 24928.93 | 25695.51 | 24905.79 | 1316.955 | 1300.579 | 1417.021 |
| 109   | LOC103248 | 974.8182 | -4.22411 | 0.176513 | -23.9309 | 1.46E-126 | 3.56E-124 | 1925.491 | 1702.998 | 1914.653 | 93.74933 | 132.6249 | 79.39338 |
| 1352  | SNX31     | 119.1968 | -4.23328 | 0.43597  | -9.71001 | 2.73E-22  | 5.37E-21  | 234.1813 | 208.5639 | 231.6785 | 8.928508 | 27.80844 | 4.019918 |
| 6248  | LOC103227 | 15.14551 | -4.23783 | 1.045656 | -4.0528  | 5.06E-05  | 0.000215  | 27.6464  | 28.46541 | 30.61218 | 0        | 2.139111 | 2.009959 |
| 753   | ADGRG2    | 228.5854 | -4.24458 | 0.340652 | -12.4602 | 1.23E-35  | 4.35E-34  | 387.0497 | 521.136  | 387.5224 | 37.94616 | 27.80844 | 10.04979 |
| 1378  | GPX3      | 110.9187 | -4.27125 | 0.444004 | -9.61984 | 6.59E-22  | 1.27E-20  | 218.4608 | 222.7966 | 186.456  | 13.39276 | 21.39111 | 3.014938 |
| 52    | TENM2     | 3527.932 | -4.27834 | 0.144122 | -29.6855 | 1.18E-193 | 6.05E-191 | 6074.62  | 8005.35  | 6043.123 | 368.301  | 363.6488 | 312.5486 |
| 12397 | LOC119618 | 3.05276  | -4.30114 | 1.852471 | -2.32184 | 0.020241  | 0.043407  | 9.215468 | 4.926706 | 4.174388 | 0        | 0        | 0        |
| 1562  | VGLL2     | 94.97331 | -4.30704 | 0.47543  | -9.05924 | 1.31E-19  | 2.24E-18  | 146.9054 | 247.4301 | 146.7993 | 6.696381 | 14.97377 | 7.034856 |
| 1674  | LHFPL6    | 81.96969 | -4.31567 | 0.491    | -8.78954 | 1.50E-18  | 2.38E-17  | 152.3263 | 176.814  | 135.6676 | 11.16063 | 12.83466 | 3.014938 |
| 1391  | TIMP4     | 91.67456 | -4.31958 | 0.451837 | -9.56004 | 1.18E-21  | 2.25E-20  | 163.7101 | 188.8571 | 168.367  | 13.39276 | 10.69555 | 5.024897 |
| 4885  | CFAP300   | 21.10501 | -4.32504 | 0.910597 | -4.74968 | 2.04E-06  | 1.11E-05  | 43.909   | 35.03436 | 42.43961 | 2.232127 | 0        | 3.014938 |
| 2078  | LOC103225 | 76.32628 | -4.36399 | 0.556435 | -7.84277 | 4.41E-15  | 5.64E-14  | 112.2119 | 165.3184 | 155.1481 | 17.85702 | 6.417332 | 1.004979 |
| 259   | FZD8      | 386.2008 | -4.38962 | 0.241722 | -18.1598 | 1.07E-73  | 1.10E-71  | 796.867  | 669.4846 | 741.6496 | 49.10679 | 29.94755 | 30.14938 |
| 2293  | NZF286A   | 254.8152 | -4.41095 | 0.593421 | -7.43309 | 1.06E-13  | 1.23E-12  | 970.8767 | 1098.108 | 935.7587 | 44.64254 | 83.42532 | 16.07967 |
| 37    | NPTX1     | 1548.072 | -4.41504 | 0.137143 | -32.1931 | 2.21E-227 | 1.59E-224 | 3075.256 | 2871.722 | 2927.638 | 140.624  | 130.4858 | 142.7071 |
| 224   | NEGR1     | 667.327  | -4.44513 | 0.230393 | -19.2937 | 6.07E-83  | 7.21E-81  | 1145.971 | 1482.391 | 1189.701 | 78.12444 | 70.59065 | 37.18424 |
| 1112  | ESRP1     | 111.5876 | -4.44681 | 0.424441 | -10.4769 | 1.10E-25  | 2.64E-24  | 211.9558 | 233.1974 | 192.0219 | 15.62489 | 10.69555 | 6.029877 |
| 2227  | SLPI      | 55.78256 | -4.45347 | 0.589298 | -7.55724 | 4.12E-14  | 4.91E-13  | 99.74389 | 108.3875 | 110.6213 | 2.232127 | 10.69555 | 3.014938 |
| 9102  | LOC103236 | 7.113656 | -4.46818 | 1.449453 | -3.08267 | 0.002052  | 0.005992  | 15.17842 | 14.23271 | 11.1317  | 0        | 2.139111 | 0        |
| 1765  | ZNF239    | 80.25282 | -4.47454 | 0.522799 | -8.55882 | 1.14E-17  | 1.72E-16  | 146.9054 | 154.3701 | 155.1481 | 13.39276 | 10.69555 | 1.004979 |
| 1558  | ZNF215    | 83.74339 | -4.47731 | 0.493917 | -9.0649  | 1.25E-19  | 2.13E-18  | 157.205  | 172.9821 | 147.4951 | 8.928508 | 12.83466 | 3.014938 |
| 748   | LRCH2     | 193.7813 | -4.50354 | 0.361181 | -12.4689 | 1.10E-35  | 3.92E-34  | 293.2687 | 485.0069 | 334.6468 | 11.16063 | 23.53022 | 15.07469 |
| 284   | FYN       | 425.1493 | -4.50379 | 0.253225 | -17.7857 | 9.12E-71  | 8.53E-69  | 746.4529 | 942.0957 | 753.4771 | 20.08914 | 55.61688 | 33.16432 |
| 6728  | LOC103215 | 14.08595 | -4.57161 | 1.188767 | -3.84568 | 0.000012  | 0.000475  | 29.81475 | 27.37059 | 22.95914 | 2.232127 | 2.139111 | 0        |
| 101   | SYT1      | 899.2815 | -4.57446 | 0.188319 | -24.291  | 2.44E-130 | 6.47E-128 | 1629.512 | 1958.639 | 1589.05  | 91.51721 | 55.61688 | 71.35354 |
| 4104  | LOC119618 | 28.81498 | -4.58819 | 0.866874 | -5.2928  | 1.20E-07  | 7.80E-07  | 66.13454 | 41.05589 | 57.04997 | 2.232127 | 6.417332 | 0        |
| 465   | CCN2      | 231.2841 | -4.61233 | 0.309102 | -14.9217 | 2.38E-50  | 1.36E-48  | 470.531  | 427.5286 | 432.0492 | 17.85702 | 25.66933 | 14.06971 |
| 820   | SCN9A     | 140.347  | -4.61906 | 0.387347 | -11.9248 | 8.78E-33  | 2.85E-31  | 258.0331 | 289.0334 | 262.2907 | 6.696381 | 14.97377 | 11.05477 |
| 10858 | LOC119618 | 3.837952 | -4.62825 | 1.740599 | -2.659   | 0.007837  | 0.019189  | 10.29964 | 4.379295 | 8.348776 | 0        | 0        | 0        |
| 2933  | LOC103237 | 41.87706 | -4.63097 | 0.711524 | -6.50852 | 7.59E-11  | 6.88E-10  | 64.50828 | 97.98671 | 77.92191 | 6.696381 | 2.139111 | 2.009959 |
| 1069  | ST6GALNA  | 110.8604 | -4.63441 | 0.435075 | -10.652  | 1.71E-26  | 4.24E-25  | 209.7874 | 216.7751 | 210.8066 | 8.928508 | 12.83466 | 6.029877 |
| 486   | BDNF      | 254.3529 | -4.63511 | 0.31366  | -14.7775 | 2.05E-49  | 1.12E-47  | 449.9317 | 557.2652 | 454.3126 | 29.01765 | 23.53022 | 12.05975 |
| 1301  | SLIT3     | 713.9623 | -4.65002 | 0.471902 | -9.85379 | 6.60E-23  | 1.35E-21  | 1297.213 | 1562.861 | 1255.795 | 62.49956 | 81.28621 | 24.11951 |
| 213   | GFRA1     | 655.1146 | -4.68089 | 0.236691 | -19.7764 | 4.75E-87  | 5.93E-85  | 1206.142 | 1420.534 | 1145.87  | 66.96381 | 62.03421 | 29.1444  |
| 145   | GPR176    | 646.9009 | -4.69407 | 0.209248 | -22.433  | 1.88E-111 | 3.44E-109 | 1256.014 | 1210.328 | 1264.84  | 73.66019 | 36.36488 | 40.19918 |
| 432   | RNF157    | 260.4927 | -4.71502 | 0.308112 | -15.3029 | 7.31E-53  | 4.50E-51  | 501.4299 | 516.7568 | 481.4461 | 22.32127 | 29.94755 | 11.05477 |
| 2698  | LRP1B     | 310.1283 | -4.72664 | 0.691409 | -6.83625 | 8.13E-12  | 8.01E-11  | 608.763  | 626.2391 | 556.5851 | 8.928508 | 49.19955 | 11.05477 |
| 2432  | RBM24     | 55.1499  | -4.75924 | 0.658802 | -7.22408 | 5.04E-13  | 5.51E-12  | 83.4813  | 133.0211 | 100.1853 | 8.928508 | 4.278221 | 1.004979 |
| 427   | RORB      | 303.8654 | -4.80992 | 0.31362  | -15.3368 | 4.34E-53  | 2.70E-51  | 535.0392 | 704.519  | 514.8412 | 26.78552 | 29.94755 | 12.05975 |
| 91    | ULK2      | 822.9258 | -4.84885 | 0.195334 | -24.8233 | 5.02E-136 | 1.47E-133 | 1667.458 | 1553.007 | 1544.524 | 51.33892 | 77.00798 | 44.2191  |
| 67    | TES       | 916.243  | -4.86943 | 0.179027 | -27.1995 | 6.59E-163 | 2.61E-160 | 1762.323 | 1825.618 | 1731.675 | 58.0353  | 53.47777 | 66.32864 |
| 888   | CYR1      | 168.703  | -4.87487 | 0.421597 | -11.5629 | 6.35E-31  | 1.90E-29  | 284.5953 | 402.8951 | 287.3371 | 6.696381 | 25.66933 | 5.024897 |
| 30    | AKAP12    | 18301.17 | -4.88436 | 0.145118 | -33.6579 | 2.39E-248 | 2.12E-245 | 30947.71 | 44924.99 | 30337.37 | 1214.277 | 1195.763 | 1186.881 |
| 2956  | LOC119618 | 40.71841 | -4.88989 | 0.754334 | -6.48239 | 9.03E-11  | 8.12E-10  | 80.22878 | 77.73248 | 77.92191 | 0        | 6.417332 | 2.009959 |
| 313   | UAP1L1    | 329.9011 | -4.90373 | 0.286269 | -17.1298 | 8.90E-66  | 7.56E-64  | 681.4026 | 562.1919 | 668.5978 | 22.32127 | 27.80844 | 17.08465 |
| 687   | FBLN7     | 169.582  | -4.97788 | 0.386612 | -12.8757 | 6.17E-38  | 2.39E-36  | 319.2889 | 307.6454 | 359.6931 | 13.39276 | 6.417332 | 11.05477 |
| 542   | NOX4      | 206.9327 |          |          |          |           |           |          |          |          |          |          |          |



|      |           |          |          |          |          |           |           |          |          |          |          |          |          |
|------|-----------|----------|----------|----------|----------|-----------|-----------|----------|----------|----------|----------|----------|----------|
| 7001 | ACSS1     | 10.59042 | -5.06979 | 1.358435 | -3.73208 | 0.00019   | 0.000721  | 22.22554 | 17.51718 | 21.56767 | 2.232127 | 0        | 0        |
| 8768 | LOC119615 | 5.275316 | -5.0879  | 1.598929 | -3.18207 | 0.001462  | 0.004433  | 13.55216 | 7.663765 | 10.43597 | 0        | 0        | 0        |
| 188  | CNRIP1    | 471.1577 | -5.0969  | 0.248072 | -20.546  | 8.35E-94  | 1.18E-91  | 870.5907 | 961.2551 | 914.191  | 31.24978 | 23.53022 | 26.12947 |
| 488  | HTATIP2   | 235.357  | -5.11012 | 0.346301 | -14.7563 | 2.80E-49  | 1.53E-47  | 484.6252 | 411.6537 | 474.4888 | 8.928508 | 21.39111 | 11.05477 |
| 159  | DKK1      | 545.8411 | -5.11703 | 0.236354 | -21.6498 | 6.10E-104 | 1.02E-101 | 1131.334 | 982.0568 | 1067.948 | 33.4819  | 32.08666 | 28.13943 |
| 2612 | LOC119621 | 49.54661 | -5.13868 | 0.738519 | -6.95808 | 3.45E-12  | 3.51E-11  | 95.94929 | 81.56436 | 109.9256 | 6.696381 | 2.139111 | 1.004979 |
| 388  | LRRC15    | 291.4846 | -5.14517 | 0.323599 | -15.8998 | 6.35E-57  | 4.35E-55  | 560.5173 | 632.2606 | 505.101  | 11.16063 | 27.80844 | 12.05975 |
| 38   | GLB1L3    | 1531.956 | -5.16817 | 0.160969 | -32.1066 | 3.56E-226 | 2.49E-223 | 3191.805 | 2833.404 | 2916.506 | 93.74933 | 74.86887 | 81.40334 |
| 48   | CDH13     | 1453.209 | -5.20849 | 0.172473 | -30.1988 | 2.45E-200 | 1.36E-197 | 2699.59  | 3162.945 | 2629.169 | 64.73168 | 83.42532 | 79.39338 |
| 2209 | LOC119621 | 58.04433 | -5.22718 | 0.689239 | -7.58399 | 3.35E-14  | 4.03E-13  | 118.7169 | 106.1979 | 116.1871 | 0        | 2.139111 | 5.024897 |
| 6598 | LOC119615 | 11.45156 | -5.24158 | 1.342763 | -3.90358 | 9.48E-05  | 0.000382  | 24.93597 | 21.89647 | 20.87194 | 0        | 0        | 1.004979 |
| 553  | DACT1     | 222.7869 | -5.25326 | 0.372108 | -14.1175 | 2.96E-45  | 1.42E-43  | 401.1439 | 461.4682 | 435.5278 | 11.16063 | 21.39111 | 6.029877 |
| 660  | DNER      | 193.0551 | -5.26486 | 0.40293  | -13.0664 | 5.12E-39  | 2.06E-37  | 427.7061 | 336.6583 | 360.3888 | 17.85702 | 10.69555 | 5.024897 |
| 87   | VASH2     | 952.5557 | -5.26566 | 0.207763 | -25.3446 | 1.03E-141 | 3.15E-139 | 1771.538 | 2113.557 | 1690.627 | 49.10679 | 34.22577 | 56.27885 |
| 496  | BVES      | 239.4973 | -5.32025 | 0.36234  | -14.683  | 8.28E-49  | 4.44E-47  | 463.4838 | 520.0412 | 416.0474 | 13.39276 | 14.97377 | 9.044815 |
| 1318 | TWIST1    | 100.8181 | -5.37168 | 0.548002 | -9.8023  | 1.10E-22  | 2.22E-21  | 201.6561 | 210.7535 | 177.4115 | 8.928508 | 2.139111 | 4.019918 |
| 110  | MMP10     | 760.3488 | -5.41567 | 0.226323 | -23.9289 | 1.53E-126 | 3.70E-124 | 1574.219 | 1361.961 | 1527.826 | 33.4819  | 21.39111 | 43.21412 |
| 167  | ZNF354C   | 578.4779 | -5.45116 | 0.255465 | -21.3382 | 5.02E-101 | 7.99E-99  | 1104.772 | 1238.246 | 1048.467 | 15.62489 | 40.6431  | 23.11453 |
| 250  | PCOLCE2   | 394.5687 | -5.45517 | 0.295822 | -18.4407 | 6.19E-76  | 6.58E-74  | 783.3148 | 810.7169 | 716.6033 | 22.32127 | 21.39111 | 13.06473 |
| 19   | IL1A      | 5653.506 | -5.48908 | 0.121476 | -45.1865 | 0         | 0         | 10500.76 | 11998.72 | 10689.22 | 243.3018 | 226.7457 | 262.2996 |
| 3589 | LOC103241 | 35.6003  | -5.49545 | 0.954664 | -5.75642 | 8.59E-09  | 6.36E-08  | 63.42411 | 93.06001 | 52.87558 | 2.232127 | 0        | 2.009959 |
| 330  | NEDD9     | 366.4355 | -5.50727 | 0.329196 | -16.7295 | 8.00E-63  | 6.44E-61  | 646.709  | 853.415  | 645.6387 | 24.5534  | 19.252   | 9.044815 |
| 103  | SLC6A15   | 739.7003 | -5.50907 | 0.227907 | -24.1725 | 4.33E-129 | 1.11E-126 | 1472.849 | 1464.874 | 1406.769 | 15.62489 | 44.92132 | 33.16432 |
| 137  | RNF150    | 720.088  | -5.52379 | 0.24205  | -22.8208 | 2.85E-115 | 5.53E-113 | 1295.044 | 1581.473 | 1345.544 | 35.71403 | 40.6431  | 22.10955 |
| 920  | TAL1      | 1395.246 | -5.60891 | 0.492127 | -11.3973 | 4.31E-30  | 1.25E-28  | 2818.849 | 2723.374 | 2658.39  | 40.17829 | 100.5382 | 30.14938 |
| 6703 | LOC103241 | 7.852838 | -5.66011 | 1.468868 | -3.85339 | 0.000116  | 0.000462  | 13.55216 | 14.78012 | 18.78475 | 0        | 0        | 0        |
| 107  | PTPDC1    | 731.5885 | -5.70829 | 0.237952 | -23.9892 | 3.60E-127 | 8.95E-125 | 1427.313 | 1502.645 | 1374.069 | 35.71403 | 25.66933 | 24.11951 |
| 18   | BCAT1     | 6118.319 | -5.77019 | 0.131243 | -43.9656 | 0         | 0         | 11433.69 | 13240.25 | 11367.55 | 258.9267 | 207.4937 | 202.0009 |
| 1146 | LOC119621 | 140.3017 | -5.80812 | 0.562502 | -10.3255 | 5.40E-25  | 1.25E-23  | 329.5885 | 179.0037 | 315.862  | 8.928508 | 6.417332 | 2.009959 |
| 990  | GGH       | 152.65   | -5.83882 | 0.529529 | -11.0264 | 2.85E-28  | 7.65E-27  | 343.6828 | 221.1544 | 335.3425 | 0        | 10.69555 | 5.024897 |
| 280  | NRCAM     | 424.1248 | -5.84172 | 0.327234 | -17.8519 | 2.80E-71  | 2.65E-69  | 733.9849 | 990.8154 | 777.8277 | 8.928508 | 17.11289 | 16.07967 |
| 324  | PELI2     | 371.3396 | -5.86485 | 0.348423 | -16.8326 | 1.41E-63  | 1.16E-61  | 716.0961 | 788.8204 | 679.0338 | 13.39276 | 25.66933 | 5.024897 |
| 162  | PNMA8A    | 640.3216 | -5.89563 | 0.27413  | -21.5067 | 1.35E-102 | 2.21E-100 | 1253.304 | 1314.336 | 1202.224 | 26.78552 | 34.22577 | 11.05477 |
| 480  | CYP27A1   | 1318.804 | -5.90661 | 0.398434 | -14.8246 | 1.02E-49  | 5.63E-48  | 2785.782 | 2397.116 | 2595.078 | 60.26743 | 53.47777 | 21.10457 |
| 39   | MSC       | 1491.439 | -5.91236 | 0.185484 | -31.8754 | 5.86E-223 | 3.99E-220 | 2916.967 | 2821.908 | 3063.305 | 46.87467 | 51.33866 | 48.23901 |
| 5943 | MYL9      | 9.751703 | -5.97352 | 1.426036 | -4.1889  | 2.80E-05  | 0.000125  | 13.55216 | 24.08612 | 20.87194 | 0        | 0        | 0        |
| 15   | ALDH1A3   | 8428.989 | -5.99507 | 0.125194 | -47.8863 | 0         | 0         | 15898.85 | 18623.5  | 15272.7  | 261.1589 | 252.4151 | 265.3146 |
| 4965 | LOC103221 | 19.79948 | -6.00255 | 1.275562 | -4.70581 | 2.53E-06  | 1.35E-05  | 37.40396 | 28.46541 | 50.78839 | 0        | 2.139111 | 0        |
| 134  | IL1B      | 697.5611 | -6.00349 | 0.261696 | -22.9407 | 1.83E-116 | 3.62E-114 | 1324.317 | 1468.706 | 1328.847 | 17.85702 | 23.53022 | 22.10955 |
| 164  | NPR3      | 635.912  | -6.01715 | 0.28155  | -21.3715 | 2.46E-101 | 3.99E-99  | 1199.637 | 1371.267 | 1179.96  | 29.01765 | 23.53022 | 12.05975 |
| 438  | LGI2      | 312.9008 | -6.01932 | 0.395233 | -15.2298 | 2.24E-52  | 1.36E-50  | 570.2749 | 746.6697 | 530.843  | 4.464254 | 17.11289 | 8.039836 |
| 8    | ADAMTS6   | 6188.465 | -6.05023 | 0.121572 | -49.7664 | 0         | 0         | 12206.16 | 12182.65 | 12179.47 | 200.8914 | 196.7982 | 164.8166 |
| 343  | LOC103221 | 369.0039 | -6.23221 | 0.376915 | -16.5348 | 2.06E-61  | 1.60E-59  | 752.4159 | 728.0577 | 699.21   | 8.928508 | 21.39111 | 4.019918 |
| 166  | WIF1      | 622.3564 | -6.23779 | 0.292162 | -21.3505 | 3.86E-101 | 6.18E-99  | 1266.314 | 1199.927 | 1218.226 | 8.928508 | 25.66933 | 15.07469 |
| 492  | DOK6      | 286.73   | -6.26104 | 0.425719 | -14.707  | 5.81E-49  | 3.14E-47  | 540.4601 | 630.6184 | 525.9729 | 4.464254 | 12.83466 | 6.029877 |
| 142  | ITIH5     | 780.4843 | -6.31873 | 0.28057  | -22.5211 | 2.58E-112 | 4.83E-110 | 1465.802 | 1718.873 | 1433.902 | 22.32127 | 29.94755 | 12.05975 |
| 1118 | MOXD1     | 158.9695 | -6.59402 | 0.631367 | -10.444  | 1.56E-25  | 3.71E-24  | 284.5953 | 374.4297 | 281.7712 | 4.464254 | 8.556443 | 0        |
| 563  | GSPT2     | 302.9416 | -6.69688 | 0.477403 | -14.0277 | 1.06E-44  | 4.98E-43  | 545.881  | 721.4888 | 532.2345 | 4.464254 | 8.556443 | 5.024897 |
| 4222 | LOC119615 | 17.69688 | -6.83343 | 1.313659 | -5.20183 | 1.97E-07  | 1.24E-06  | 36.86187 | 31.74989 | 37.56949 | 0        | 0        | 0        |
| 133  | CSTA      | 933.8292 | -6.99243 | 0.303796 | -23.0169 | 3.16E-117 | 6.31E-115 | 1901.639 | 1693.145 | 1966.833 | 17.85702 | 6.417332 | 17.08465 |
| 243  | POSTN     | 638.3276 | -7.03237 | 0.376657 | -18.6705 | 8.61E-78  | 9.42E-76  | 1141.634 | 1474.727 | 1179.265 | 8.928508 | 21.39111 | 4.019918 |
| 202  | NPEPL1    | 698.5032 | -7.04174 | 0.349873 | -20.1266 | 4.32E-90  | 5.66E-88  | 1458.754 | 1277.659 | 1421.379 | 15.62489 | 8.556443 | 9.044815 |
| 3867 | LOC119615 | 21.15583 | -7.09234 | 1.293836 | -5.48164 | 4.21E-08  | 2.90E-07  | 41.74065 | 47.62483 | 37.56949 | 0        | 0        | 0        |
| 3736 | LOC119615 | 22.90281 | -7.20638 | 1.285121 | -5.60755 | 2.05E-08  | 1.46E-07  | 42.82482 | 51.45671 | 43.13534 | 0        | 0        | 0        |
| 61   | EDN1      | 1805.89  | -7.21056 | 0.258143 | -27.9324 | 1.08E-171 | 4.70E-169 | 3166.869 | 4279.118 | 3315.16  | 17.85702 | 34.22577 | 22.10955 |
| 75   | LRRC10B   | 1399.749 | -7.25672 | 0.274758 | -26.4113 | 1.02E-153 | 3.60E-151 | 2933.229 | 2508.788 | 2904.678 | 17.85702 | 12.83466 | 21.10457 |
| 1019 | DNAJC15   | 217.8495 | -7.36335 | 0.674922 | -10.9099 | 1.03E-27  | 2.69E-26  | 378.9184 | 462.563  | 457.0955 | 2.232127 | 4.278221 | 2.009959 |
| 1337 | SPINK6    | 195.41   | -7.48949 | 0.767878 | -9.75349 | 1.78E-22  | 3.54E-21  | 460.2313 | 245.7879 | 457.7912 | 2.232127 | 6.417332 | 0        |
| 112  | CRMP1     | 1262.429 | -7.61574 | 0.318917 | -23.88   | 4.94E-126 | 1.17E-123 | 2418.247 | 2708.594 | 2402.36  | 20.08914 | 19.252   | 6.029877 |
| 818  | PENK      | 339.0601 | -7.99569 | 0.669211 | -11.9479 | 6.66E-33  | 2.16E-31  | 623.3993 | 793.7471 | 607.3735 | 6.696381 | 2.139111 | 1.004979 |
| 95   | ZNF521    | 1658.615 | -8.2098  | 0.33504  | -24.5039 | 1.34E-132 | 3.76E-130 | 3338.168 | 3488.655 | 3084.873 | 17.85702 | 17.11289 | 5.024897 |
| 13   | CXCL12    | 4767.754 | -8.2527  | 0.216661 | -38.0903 | 0         | 0         | 8979.119 | 10303.39 | 9226.094 | 29.01765 | 42.78221 | 26.12947 |
