# Supplementary material for: Comparative Transcriptomic Analyses of a Vero Cell Line in Suspension versus Adherent Culture Conditions
Source: Int J Cell Biol. 2023 Aug 30;2023:9364689. doi: 10.1155/2023/9364689 (PMC10482560; doi:10.1155/2023/9364689)
Supplement: Supplementary Materials — Two supplementary materials are made available. Supplementary Table S1: compiling the differentially expressed gene list. Supplementary Table S2: containing the raw results from metabolic analysis. [file 9364689.f1.zip]

Archive with 2 entries (2 files):
- Supplementary_table_S1_Differentially_expressed_genes.pdf
- Supplementary_table_S2_MaREA_-_Results__Adherent_vs_Suspension.pdf
